# Supplementary material
Source: PubMed Central journal article supplement (PMC8197659)
Supplement: NIHMS1588170-supplement-lncRNA_annotation_file.pdf [file NIHMS1588170-supplement-lncRNA_annotation_file.pdf]

|      |           |      |        |        |   |   |   |                                                                                                          |
|------|-----------|------|--------|--------|---|---|---|----------------------------------------------------------------------------------------------------------|
| chr1 | Cufflinks | exon | 840002 | 840341 | . | + | . | gene_id "XLOC_000010"; transcript_id "TCONS_00000011"; exon_number "1"; oId "CUFF.68.1"; tss_id "TSS11"; |
| chr1 | Cufflinks | exon | 840675 | 841059 | . | + | . | gene_id "XLOC_000010"; transcript_id "TCONS_00000011"; exon_number "2"; oId "CUFF.68.1"; tss_id "TSS11"; |
| chr1 | Cufflinks | exon | 841182 | 843868 | . | + | . | gene_id "XLOC_000010"; transcript_id "TCONS_00000011"; exon_number "3"; oId "CUFF.68.1"; tss_id "TSS11"; |
| chr1 | Cufflinks | exon | 840459 | 841059 | . | + | . | gene_id "XLOC_000010"; transcript_id "TCONS_00000012"; exon_number "1"; oId "CUFF.68.2"; tss_id "TSS12"; |
| chr1 | Cufflinks | exon | 841182 | 843592 | . | + | . | gene_id "XLOC_000010"; transcript_id "TCONS_00000012"; exon_number "2"; oId "CUFF.68.2"; tss_id "TSS12"; |
| chr1 | Cufflinks | exon | 846248 | 850615 | . | + | . | gene_id "XLOC_000010"; transcript_id "TCONS_00000012"; exon_number "3"; oId "CUFF.68.2"; tss_id "TSS12"; |
| chr1 | Cufflinks | exon | 850699 | 850851 | . | + | . | gene_id "XLOC_000010"; transcript_id "TCONS_00000012"; exon_number "4"; oId "CUFF.68.2"; tss_id "TSS12"; |
| chr1 | Cufflinks | exon | 851130 | 853506 | . | + | . | gene_id "XLOC_000010"; transcript_id "TCONS_00000012"; exon_number "5"; oId "CUFF.68.2"; tss_id "TSS12"; |
| chr1 | Cufflinks | exon | 845561 | 849824 | . | + | . | gene_id "XLOC_000010"; transcript_id "TCONS_00000014"; exon_number "1"; oId "CUFF.68.4"; tss_id "TSS13"; |
| chr1 | Cufflinks | exon | 850183 | 850851 | . | + | . | gene_id "XLOC_000010"; transcript_id "TCONS_00000014"; exon_number "2"; oId "CUFF.68.4"; tss_id "TSS13"; |
| chr1 | Cufflinks | exon | 851130 | 851329 | . | + | . | gene_id "XLOC_000010"; transcript_id "TCONS_00000014"; exon_number "3"; oId "CUFF.68.4"; tss_id "TSS13"; |
| chr1 | Cufflinks | exon | 851697 | 851813 | . | + | . | gene_id "XLOC_000010"; transcript_id "TCONS_00000014"; exon_number "4"; oId "CUFF.68.4"; tss_id "TSS13"; |
| chr1 | Cufflinks | exon | 853262 | 853451 | . | + | . | gene_id "XLOC_000010"; transcript_id "TCONS_00000014"; exon_number "5"; oId "CUFF.68.4"; tss_id "TSS13"; |
| chr1 | Cufflinks | exon | 854835 | 855176 | . | + | . | gene_id "XLOC_000010"; transcript_id "TCONS_00000014"; exon_number "6"; oId "CUFF.68.4"; tss_id "TSS13"; |
| chr1 | Cufflinks | exon | 855350 | 856399 | . | + | . | gene_id "XLOC_000010"; transcript_id "TCONS_00000014"; exon_number "7"; oId "CUFF.68.4"; tss_id "TSS13"; |
| chr1 | Cufflinks | exon | 845561 | 850383 | . | + | . | gene_id "XLOC_000010"; transcript_id "TCONS_00000013"; exon_number "1"; oId "CUFF.68.3"; tss_id "TSS13"; |
| chr1 | Cufflinks | exon | 850699 | 850851 | . | + | . | gene_id "XLOC_000010"; transcript_id "TCONS_00000013"; exon_number "2"; oId "CUFF.68.3"; tss_id "TSS13"; |
| chr1 | Cufflinks | exon | 851130 | 851329 | . | + | . | gene_id "XLOC_000010"; transcript_id "TCONS_00000013"; exon_number "3"; oId "CUFF.68.3"; tss_id "TSS13"; |
| chr1 | Cufflinks | exon | 853262 | 853451 | . | + | . | gene_id "XLOC_000010"; transcript_id "TCONS_00000013"; exon_number "4"; oId "CUFF.68.3"; tss_id "TSS13"; |
| chr1 | Cufflinks | exon | 855350 | 855461 | . | + | . | gene_id "XLOC_000010"; transcript_id "TCONS_00000013"; exon_number "5"; oId "CUFF.68.3"; tss_id "TSS13"; |
| chr1 | Cufflinks | exon | 855601 | 856399 | . | + | . | gene_id "XLOC_000010"; transcript_id "TCONS_00000013"; exon_number "6"; oId "CUFF.68.3"; tss_id "TSS13"; |
| chr1 | Cufflinks | exon | 847106 | 849824 | . | + | . | gene_id "XLOC_000010"; transcript_id "TCONS_00000015"; exon_number "1"; oId                              |

"CUFF.68.5"; tss\_id "TSS14";  
chr1 Cufflinks exon 850183 850383 . + . gene\_id "XLOC\_000010"; transcript\_id "TCONS\_00000015"; exon\_number "2"; oId  
"CUFF.68.5"; tss\_id "TSS14";  
chr1 Cufflinks exon 850551 850851 . + . gene\_id "XLOC\_000010"; transcript\_id "TCONS\_00000015"; exon\_number "3"; oId  
"CUFF.68.5"; tss\_id "TSS14";  
chr1 Cufflinks exon 851130 853506 . + . gene\_id "XLOC\_000010"; transcript\_id "TCONS\_00000015"; exon\_number "4"; oId  
"CUFF.68.5"; tss\_id "TSS14";  
chr1 Cufflinks exon 1209394 1209861 . + . gene\_id "XLOC\_000027"; transcript\_id "TCONS\_00000040"; exon\_number "1"; oId  
"CUFF.139.3"; tss\_id "TSS34";  
chr1 Cufflinks exon 1210183 1210679 . + . gene\_id "XLOC\_000027"; transcript\_id "TCONS\_00000040"; exon\_number "2"; oId  
"CUFF.139.3"; tss\_id "TSS34";  
chr1 Cufflinks exon 1214448 1214610 . + . gene\_id "XLOC\_000027"; transcript\_id "TCONS\_00000040"; exon\_number "3"; oId  
"CUFF.139.3"; tss\_id "TSS34";  
chr1 Cufflinks exon 1214711 1214779 . + . gene\_id "XLOC\_000027"; transcript\_id "TCONS\_00000040"; exon\_number "4"; oId  
"CUFF.139.3"; tss\_id "TSS34";  
chr1 Cufflinks exon 1209394 1209861 . + . gene\_id "XLOC\_000027"; transcript\_id "TCONS\_00000039"; exon\_number "1"; oId  
"CUFF.139.2"; tss\_id "TSS34";  
chr1 Cufflinks exon 1214448 1214610 . + . gene\_id "XLOC\_000027"; transcript\_id "TCONS\_00000039"; exon\_number "2"; oId  
"CUFF.139.2"; tss\_id "TSS34";  
chr1 Cufflinks exon 1214711 1214779 . + . gene\_id "XLOC\_000027"; transcript\_id "TCONS\_00000039"; exon\_number "3"; oId  
"CUFF.139.2"; tss\_id "TSS34";  
chr1 Cufflinks exon 1209394 1209861 . + . gene\_id "XLOC\_000027"; transcript\_id "TCONS\_00000038"; exon\_number "1"; oId  
"CUFF.139.1"; tss\_id "TSS34";  
chr1 Cufflinks exon 1210342 1210679 . + . gene\_id "XLOC\_000027"; transcript\_id "TCONS\_00000038"; exon\_number "2"; oId  
"CUFF.139.1"; tss\_id "TSS34";  
chr1 Cufflinks exon 1214448 1214528 . + . gene\_id "XLOC\_000027"; transcript\_id "TCONS\_00000038"; exon\_number "3"; oId  
"CUFF.139.1"; tss\_id "TSS34";  
chr1 Cufflinks exon 1214711 1214779 . + . gene\_id "XLOC\_000027"; transcript\_id "TCONS\_00000038"; exon\_number "4"; oId  
"CUFF.139.1"; tss\_id "TSS34";  
chr1 Cufflinks exon 1209397 1209861 . + . gene\_id "XLOC\_000027"; transcript\_id "TCONS\_00000043"; exon\_number "1"; oId  
"CUFF.139.6"; tss\_id "TSS34";  
chr1 Cufflinks exon 1210342 1210679 . + . gene\_id "XLOC\_000027"; transcript\_id "TCONS\_00000043"; exon\_number "2"; oId  
"CUFF.139.6"; tss\_id "TSS34";  
chr1 Cufflinks exon 1214448 1214610 . + . gene\_id "XLOC\_000027"; transcript\_id "TCONS\_00000043"; exon\_number "3"; oId  
"CUFF.139.6"; tss\_id "TSS34";  
chr1 Cufflinks exon 1214711 1214779 . + . gene\_id "XLOC\_000027"; transcript\_id "TCONS\_00000043"; exon\_number "4"; oId  
"CUFF.139.6"; tss\_id "TSS34";  
chr1 Cufflinks exon 1209397 1209861 . + . gene\_id "XLOC\_000027"; transcript\_id "TCONS\_00000042"; exon\_number "1"; oId  
"CUFF.139.5"; tss\_id "TSS34";  
chr1 Cufflinks exon 1214448 1214563 . + . gene\_id "XLOC\_000027"; transcript\_id "TCONS\_00000042"; exon\_number "2"; oId  
"CUFF.139.5"; tss\_id "TSS34";  
chr1 Cufflinks exon 1214711 1214779 . + . gene\_id "XLOC\_000027"; transcript\_id "TCONS\_00000042"; exon\_number "3"; oId  
"CUFF.139.5"; tss\_id "TSS34";

|      |           |      |         |         |   |   |   |                                                                                                           |
|------|-----------|------|---------|---------|---|---|---|-----------------------------------------------------------------------------------------------------------|
| chr1 | Cufflinks | exon | 1209397 | 1209861 | . | + | . | gene_id "XLOC_000027"; transcript_id "TCONS_00000041"; exon_number "1"; oId "CUFF.139.4"; tss_id "TSS34"; |
| chr1 | Cufflinks | exon | 1214448 | 1214528 | . | + | . | gene_id "XLOC_000027"; transcript_id "TCONS_00000041"; exon_number "2"; oId "CUFF.139.4"; tss_id "TSS34"; |
| chr1 | Cufflinks | exon | 1214711 | 1214779 | . | + | . | gene_id "XLOC_000027"; transcript_id "TCONS_00000041"; exon_number "3"; oId "CUFF.139.4"; tss_id "TSS34"; |
| chr1 | Cufflinks | exon | 1209875 | 1210679 | . | + | . | gene_id "XLOC_000027"; transcript_id "TCONS_00000044"; exon_number "1"; oId "CUFF.139.7"; tss_id "TSS35"; |
| chr1 | Cufflinks | exon | 1214448 | 1214779 | . | + | . | gene_id "XLOC_000027"; transcript_id "TCONS_00000044"; exon_number "2"; oId "CUFF.139.7"; tss_id "TSS35"; |
| chr1 | Cufflinks | exon | 1286809 | 1290456 | . | + | . | gene_id "XLOC_000035"; transcript_id "TCONS_00000059"; exon_number "1"; oId "CUFF.159.2"; tss_id "TSS46"; |
| chr1 | Cufflinks | exon | 1290688 | 1291116 | . | + | . | gene_id "XLOC_000035"; transcript_id "TCONS_00000059"; exon_number "2"; oId "CUFF.159.2"; tss_id "TSS46"; |
| chr1 | Cufflinks | exon | 1292594 | 1297623 | . | + | . | gene_id "XLOC_000035"; transcript_id "TCONS_00000059"; exon_number "3"; oId "CUFF.159.2"; tss_id "TSS46"; |
| chr1 | Cufflinks | exon | 1286809 | 1287289 | . | + | . | gene_id "XLOC_000035"; transcript_id "TCONS_00000058"; exon_number "1"; oId "CUFF.159.1"; tss_id "TSS46"; |
| chr1 | Cufflinks | exon | 1287518 | 1290456 | . | + | . | gene_id "XLOC_000035"; transcript_id "TCONS_00000058"; exon_number "2"; oId "CUFF.159.1"; tss_id "TSS46"; |
| chr1 | Cufflinks | exon | 1290688 | 1291120 | . | + | . | gene_id "XLOC_000035"; transcript_id "TCONS_00000058"; exon_number "3"; oId "CUFF.159.1"; tss_id "TSS46"; |
| chr1 | Cufflinks | exon | 1292594 | 1297623 | . | + | . | gene_id "XLOC_000035"; transcript_id "TCONS_00000058"; exon_number "4"; oId "CUFF.159.1"; tss_id "TSS46"; |
| chr1 | Cufflinks | exon | 1286814 | 1290456 | . | + | . | gene_id "XLOC_000035"; transcript_id "TCONS_00000061"; exon_number "1"; oId "CUFF.159.4"; tss_id "TSS46"; |
| chr1 | Cufflinks | exon | 1290643 | 1291116 | . | + | . | gene_id "XLOC_000035"; transcript_id "TCONS_00000061"; exon_number "2"; oId "CUFF.159.4"; tss_id "TSS46"; |
| chr1 | Cufflinks | exon | 1292594 | 1297623 | . | + | . | gene_id "XLOC_000035"; transcript_id "TCONS_00000061"; exon_number "3"; oId "CUFF.159.4"; tss_id "TSS46"; |
| chr1 | Cufflinks | exon | 1286814 | 1290456 | . | + | . | gene_id "XLOC_000035"; transcript_id "TCONS_00000060"; exon_number "1"; oId "CUFF.159.3"; tss_id "TSS46"; |
| chr1 | Cufflinks | exon | 1290688 | 1291120 | . | + | . | gene_id "XLOC_000035"; transcript_id "TCONS_00000060"; exon_number "2"; oId "CUFF.159.3"; tss_id "TSS46"; |
| chr1 | Cufflinks | exon | 1292594 | 1297623 | . | + | . | gene_id "XLOC_000035"; transcript_id "TCONS_00000060"; exon_number "3"; oId "CUFF.159.3"; tss_id "TSS46"; |
| chr1 | Cufflinks | exon | 1535722 | 1535962 | . | + | . | gene_id "XLOC_000047"; transcript_id "TCONS_00000078"; exon_number "1"; oId "CUFF.198.3"; tss_id "TSS60"; |
| chr1 | Cufflinks | exon | 1536037 | 1536086 | . | + | . | gene_id "XLOC_000047"; transcript_id "TCONS_00000078"; exon_number "2"; oId "CUFF.198.3"; tss_id "TSS60"; |
| chr1 | Cufflinks | exon | 1537453 | 1537476 | . | + | . | gene_id "XLOC_000047"; transcript_id "TCONS_00000078"; exon_number "3"; oId "CUFF.198.3"; tss_id "TSS60"; |
| chr1 | Cufflinks | exon | 1535722 | 1535962 | . | + | . | gene_id "XLOC_000047"; transcript_id "TCONS_00000077"; exon_number "1"; oId "CUFF.198.3"; tss_id "TSS60"; |

"CUFF.198.2"; tss\_id "TSS60";  
chr1 Cufflinks exon 1536037 1536086 . + . gene\_id "XLOC\_000047"; transcript\_id "TCONS\_00000077"; exon\_number "2"; oId  
"CUFF.198.2"; tss\_id "TSS60";  
chr1 Cufflinks exon 1536333 1537476 . + . gene\_id "XLOC\_000047"; transcript\_id "TCONS\_00000077"; exon\_number "3"; oId  
"CUFF.198.2"; tss\_id "TSS60";  
chr1 Cufflinks exon 1535722 1535962 . + . gene\_id "XLOC\_000047"; transcript\_id "TCONS\_00000076"; exon\_number "1"; oId  
"CUFF.198.1"; tss\_id "TSS60";  
chr1 Cufflinks exon 1536037 1537476 . + . gene\_id "XLOC\_000047"; transcript\_id "TCONS\_00000076"; exon\_number "2"; oId  
"CUFF.198.1"; tss\_id "TSS60";  
chr1 Cufflinks exon 1822993 1823291 . + . gene\_id "XLOC\_000051"; transcript\_id "TCONS\_00000087"; exon\_number "1"; oId  
"CUFF.220.2"; tss\_id "TSS65";  
chr1 Cufflinks exon 1823574 1828601 . + . gene\_id "XLOC\_000051"; transcript\_id "TCONS\_00000087"; exon\_number "2"; oId  
"CUFF.220.2"; tss\_id "TSS65";  
chr1 Cufflinks exon 2246759 2247437 . + . gene\_id "XLOC\_000065"; transcript\_id "TCONS\_00000106"; exon\_number "1"; oId  
"CUFF.260.2"; tss\_id "TSS81";  
chr1 Cufflinks exon 2247831 2248450 . + . gene\_id "XLOC\_000065"; transcript\_id "TCONS\_00000106"; exon\_number "2"; oId  
"CUFF.260.2"; tss\_id "TSS81";  
chr1 Cufflinks exon 2249050 2249168 . + . gene\_id "XLOC\_000065"; transcript\_id "TCONS\_00000106"; exon\_number "3"; oId  
"CUFF.260.2"; tss\_id "TSS81";  
chr1 Cufflinks exon 2250429 2250928 . + . gene\_id "XLOC\_000065"; transcript\_id "TCONS\_00000106"; exon\_number "4"; oId  
"CUFF.260.2"; tss\_id "TSS81";  
chr1 Cufflinks exon 2246759 2247437 . + . gene\_id "XLOC\_000065"; transcript\_id "TCONS\_00000105"; exon\_number "1"; oId  
"CUFF.260.1"; tss\_id "TSS81";  
chr1 Cufflinks exon 2247831 2248450 . + . gene\_id "XLOC\_000065"; transcript\_id "TCONS\_00000105"; exon\_number "2"; oId  
"CUFF.260.1"; tss\_id "TSS81";  
chr1 Cufflinks exon 2250429 2250928 . + . gene\_id "XLOC\_000065"; transcript\_id "TCONS\_00000105"; exon\_number "3"; oId  
"CUFF.260.1"; tss\_id "TSS81";  
chr1 Cufflinks exon 2246783 2248451 . + . gene\_id "XLOC\_000065"; transcript\_id "TCONS\_00000107"; exon\_number "1"; oId  
"CUFF.260.3"; tss\_id "TSS81";  
chr1 Cufflinks exon 2250430 2250928 . + . gene\_id "XLOC\_000065"; transcript\_id "TCONS\_00000107"; exon\_number "2"; oId  
"CUFF.260.3"; tss\_id "TSS81";  
chr1 Cufflinks exon 2246799 2247437 . + . gene\_id "XLOC\_000065"; transcript\_id "TCONS\_00000108"; exon\_number "1"; oId  
"CUFF.260.4"; tss\_id "TSS81";  
chr1 Cufflinks exon 2250429 2250928 . + . gene\_id "XLOC\_000065"; transcript\_id "TCONS\_00000108"; exon\_number "2"; oId  
"CUFF.260.4"; tss\_id "TSS81";  
chr1 Cufflinks exon 2347461 2347968 . + . gene\_id "XLOC\_000071"; transcript\_id "TCONS\_00000116"; exon\_number "1"; oId  
"CUFF.283.1"; tss\_id "TSS87";  
chr1 Cufflinks exon 2357148 2357411 . + . gene\_id "XLOC\_000071"; transcript\_id "TCONS\_00000116"; exon\_number "2"; oId  
"CUFF.283.1"; tss\_id "TSS87";  
chr1 Cufflinks exon 2347461 2347968 . + . gene\_id "XLOC\_000071"; transcript\_id "TCONS\_00000117"; exon\_number "1"; oId  
"CUFF.283.2"; tss\_id "TSS87";  
chr1 Cufflinks exon 2361777 2361937 . + . gene\_id "XLOC\_000071"; transcript\_id "TCONS\_00000117"; exon\_number "2"; oId  
"CUFF.283.2"; tss\_id "TSS87";

|      |           |      |         |         |   |   |   |                                                                                                            |
|------|-----------|------|---------|---------|---|---|---|------------------------------------------------------------------------------------------------------------|
| chr1 | Cufflinks | exon | 2465568 | 2466361 | . | + | . | gene_id "XLOC_000075"; transcript_id "TCONS_00000124"; exon_number "1"; oId "CUFF.291.2"; tss_id "TSS93";  |
| chr1 | Cufflinks | exon | 2477408 | 2480279 | . | + | . | gene_id "XLOC_000075"; transcript_id "TCONS_00000124"; exon_number "2"; oId "CUFF.291.2"; tss_id "TSS93";  |
| chr1 | Cufflinks | exon | 2465568 | 2466361 | . | + | . | gene_id "XLOC_000075"; transcript_id "TCONS_00000125"; exon_number "1"; oId "CUFF.291.1"; tss_id "TSS93";  |
| chr1 | Cufflinks | exon | 2477408 | 2478509 | . | + | . | gene_id "XLOC_000075"; transcript_id "TCONS_00000125"; exon_number "2"; oId "CUFF.291.1"; tss_id "TSS93";  |
| chr1 | Cufflinks | exon | 2481992 | 2482002 | . | + | . | gene_id "XLOC_000075"; transcript_id "TCONS_00000125"; exon_number "3"; oId "CUFF.291.1"; tss_id "TSS93";  |
| chr1 | Cufflinks | exon | 2509013 | 2509335 | . | + | . | gene_id "XLOC_000079"; transcript_id "TCONS_00000139"; exon_number "1"; oId "CUFF.299.2"; tss_id "TSS102"; |
| chr1 | Cufflinks | exon | 2512999 | 2513089 | . | + | . | gene_id "XLOC_000079"; transcript_id "TCONS_00000139"; exon_number "2"; oId "CUFF.299.2"; tss_id "TSS102"; |
| chr1 | Cufflinks | exon | 2514809 | 2514934 | . | + | . | gene_id "XLOC_000079"; transcript_id "TCONS_00000139"; exon_number "3"; oId "CUFF.299.2"; tss_id "TSS102"; |
| chr1 | Cufflinks | exon | 2515564 | 2515973 | . | + | . | gene_id "XLOC_000079"; transcript_id "TCONS_00000139"; exon_number "4"; oId "CUFF.299.2"; tss_id "TSS102"; |
| chr1 | Cufflinks | exon | 3824174 | 3830023 | . | + | . | gene_id "XLOC_000094"; transcript_id "TCONS_00000175"; exon_number "1"; oId "CUFF.351.2"; tss_id "TSS127"; |
| chr1 | Cufflinks | exon | 3830959 | 3834082 | . | + | . | gene_id "XLOC_000094"; transcript_id "TCONS_00000175"; exon_number "2"; oId "CUFF.351.2"; tss_id "TSS127"; |
| chr1 | Cufflinks | exon | 6296176 | 6296396 | . | + | . | gene_id "XLOC_000109"; transcript_id "TCONS_00000203"; exon_number "1"; oId "CUFF.416.3"; tss_id "TSS151"; |
| chr1 | Cufflinks | exon | 6297305 | 6297405 | . | + | . | gene_id "XLOC_000109"; transcript_id "TCONS_00000203"; exon_number "2"; oId "CUFF.416.3"; tss_id "TSS151"; |
| chr1 | Cufflinks | exon | 6297530 | 6297908 | . | + | . | gene_id "XLOC_000109"; transcript_id "TCONS_00000203"; exon_number "3"; oId "CUFF.416.3"; tss_id "TSS151"; |
| chr1 | Cufflinks | exon | 6298281 | 6299519 | . | + | . | gene_id "XLOC_000109"; transcript_id "TCONS_00000203"; exon_number "4"; oId "CUFF.416.3"; tss_id "TSS151"; |
| chr1 | Cufflinks | exon | 6296176 | 6296396 | . | + | . | gene_id "XLOC_000109"; transcript_id "TCONS_00000202"; exon_number "1"; oId "CUFF.416.2"; tss_id "TSS151"; |
| chr1 | Cufflinks | exon | 6297026 | 6297210 | . | + | . | gene_id "XLOC_000109"; transcript_id "TCONS_00000202"; exon_number "2"; oId "CUFF.416.2"; tss_id "TSS151"; |
| chr1 | Cufflinks | exon | 6297305 | 6297405 | . | + | . | gene_id "XLOC_000109"; transcript_id "TCONS_00000202"; exon_number "3"; oId "CUFF.416.2"; tss_id "TSS151"; |
| chr1 | Cufflinks | exon | 6297530 | 6297908 | . | + | . | gene_id "XLOC_000109"; transcript_id "TCONS_00000202"; exon_number "4"; oId "CUFF.416.2"; tss_id "TSS151"; |
| chr1 | Cufflinks | exon | 6298281 | 6299519 | . | + | . | gene_id "XLOC_000109"; transcript_id "TCONS_00000202"; exon_number "5"; oId "CUFF.416.2"; tss_id "TSS151"; |
| chr1 | Cufflinks | exon | 6296176 | 6296396 | . | + | . | gene_id "XLOC_000109"; transcript_id "TCONS_00000201"; exon_number "1"; oId "CUFF.416.1"; tss_id "TSS151"; |
| chr1 | Cufflinks | exon | 6297026 | 6297206 | . | + | . | gene_id "XLOC_000109"; transcript_id "TCONS_00000201"; exon_number "2"; oId "CUFF.416.1"; tss_id "TSS151"; |

"CUFF.416.1"; tss\_id "TSS151";  
chr1 Cufflinks exon 6297305 6297405 . + . gene\_id "XLOC\_000109"; transcript\_id "TCONS\_00000201"; exon\_number "3"; oId  
"CUFF.416.1"; tss\_id "TSS151";  
chr1 Cufflinks exon 6297874 6297908 . + . gene\_id "XLOC\_000109"; transcript\_id "TCONS\_00000201"; exon\_number "4"; oId  
"CUFF.416.1"; tss\_id "TSS151";  
chr1 Cufflinks exon 6298281 6299519 . + . gene\_id "XLOC\_000109"; transcript\_id "TCONS\_00000201"; exon\_number "5"; oId  
"CUFF.416.1"; tss\_id "TSS151";  
chr1 Cufflinks exon6296206 6296396 . + . gene\_id "XLOC\_000109"; transcript\_id "TCONS\_00000204"; exon\_number "1"; oId  
"CUFF.416.4"; tss\_id "TSS151";  
chr1 Cufflinks exon6297026 6297206 . + . gene\_id "XLOC\_000109"; transcript\_id "TCONS\_00000204"; exon\_number "2"; oId  
"CUFF.416.4"; tss\_id "TSS151";  
chr1 Cufflinks exon6297305 6297405 . + . gene\_id "XLOC\_000109"; transcript\_id "TCONS\_00000204"; exon\_number "3"; oId  
"CUFF.416.4"; tss\_id "TSS151";  
chr1 Cufflinks exon6297530 6297908 . + . gene\_id "XLOC\_000109"; transcript\_id "TCONS\_00000204"; exon\_number "4"; oId  
"CUFF.416.4"; tss\_id "TSS151";  
chr1 Cufflinks exon6298281 6299519 . + . gene\_id "XLOC\_000109"; transcript\_id "TCONS\_00000204"; exon\_number "5"; oId  
"CUFF.416.4"; tss\_id "TSS151";  
chr1 Cufflinks exon6296212 6296396 . + . gene\_id "XLOC\_000109"; transcript\_id "TCONS\_00000206"; exon\_number "1"; oId  
"CUFF.416.6"; tss\_id "TSS151";  
chr1 Cufflinks exon6297029 6297210 . + . gene\_id "XLOC\_000109"; transcript\_id "TCONS\_00000206"; exon\_number "2"; oId  
"CUFF.416.6"; tss\_id "TSS151";  
chr1 Cufflinks exon6297305 6297405 . + . gene\_id "XLOC\_000109"; transcript\_id "TCONS\_00000206"; exon\_number "3"; oId  
"CUFF.416.6"; tss\_id "TSS151";  
chr1 Cufflinks exon6297530 6297908 . + . gene\_id "XLOC\_000109"; transcript\_id "TCONS\_00000206"; exon\_number "4"; oId  
"CUFF.416.6"; tss\_id "TSS151";  
chr1 Cufflinks exon6298281 6299519 . + . gene\_id "XLOC\_000109"; transcript\_id "TCONS\_00000206"; exon\_number "5"; oId  
"CUFF.416.6"; tss\_id "TSS151";  
chr1 Cufflinks exon6296212 6296396 . + . gene\_id "XLOC\_000109"; transcript\_id "TCONS\_00000205"; exon\_number "1"; oId  
"CUFF.416.5"; tss\_id "TSS151";  
chr1 Cufflinks exon6297305 6297406 . + . gene\_id "XLOC\_000109"; transcript\_id "TCONS\_00000205"; exon\_number "2"; oId  
"CUFF.416.5"; tss\_id "TSS151";  
chr1 Cufflinks exon6297531 6297908 . + . gene\_id "XLOC\_000109"; transcript\_id "TCONS\_00000205"; exon\_number "3"; oId  
"CUFF.416.5"; tss\_id "TSS151";  
chr1 Cufflinks exon6298281 6299519 . + . gene\_id "XLOC\_000109"; transcript\_id "TCONS\_00000205"; exon\_number "4"; oId  
"CUFF.416.5"; tss\_id "TSS151";  
chr1 Cufflinks exon6296242 6296396 . + . gene\_id "XLOC\_000109"; transcript\_id "TCONS\_00000207"; exon\_number "1"; oId  
"CUFF.416.7"; tss\_id "TSS151";  
chr1 Cufflinks exon6297305 6297405 . + . gene\_id "XLOC\_000109"; transcript\_id "TCONS\_00000207"; exon\_number "2"; oId  
"CUFF.416.7"; tss\_id "TSS151";  
chr1 Cufflinks exon6297874 6297908 . + . gene\_id "XLOC\_000109"; transcript\_id "TCONS\_00000207"; exon\_number "3"; oId  
"CUFF.416.7"; tss\_id "TSS151";  
chr1 Cufflinks exon6298281 6299519 . + . gene\_id "XLOC\_000109"; transcript\_id "TCONS\_00000207"; exon\_number "4"; oId  
"CUFF.416.7"; tss\_id "TSS151";

|                                      |   |   |                                                                                                             |
|--------------------------------------|---|---|-------------------------------------------------------------------------------------------------------------|
| chr1 Cufflinks exon6296300 6296396 . | + | . | gene_id "XLOC_000109"; transcript_id "TCONS_00000210"; exon_number "1"; oId "CUFF.416.9"; tss_id "TSS152";  |
| chr1 Cufflinks exon6297029 6297206 . | + | . | gene_id "XLOC_000109"; transcript_id "TCONS_00000210"; exon_number "2"; oId "CUFF.416.9"; tss_id "TSS152";  |
| chr1 Cufflinks exon6297305 6297405 . | + | . | gene_id "XLOC_000109"; transcript_id "TCONS_00000210"; exon_number "3"; oId "CUFF.416.9"; tss_id "TSS152";  |
| chr1 Cufflinks exon6297874 6297908 . | + | . | gene_id "XLOC_000109"; transcript_id "TCONS_00000210"; exon_number "4"; oId "CUFF.416.9"; tss_id "TSS152";  |
| chr1 Cufflinks exon6298281 6299519 . | + | . | gene_id "XLOC_000109"; transcript_id "TCONS_00000210"; exon_number "5"; oId "CUFF.416.9"; tss_id "TSS152";  |
| chr1 Cufflinks exon6296300 6296396 . | + | . | gene_id "XLOC_000109"; transcript_id "TCONS_00000209"; exon_number "1"; oId "CUFF.416.8"; tss_id "TSS152";  |
| chr1 Cufflinks exon6297026 6297210 . | + | . | gene_id "XLOC_000109"; transcript_id "TCONS_00000209"; exon_number "2"; oId "CUFF.416.8"; tss_id "TSS152";  |
| chr1 Cufflinks exon6297305 6297405 . | + | . | gene_id "XLOC_000109"; transcript_id "TCONS_00000209"; exon_number "3"; oId "CUFF.416.8"; tss_id "TSS152";  |
| chr1 Cufflinks exon6297874 6297908 . | + | . | gene_id "XLOC_000109"; transcript_id "TCONS_00000209"; exon_number "4"; oId "CUFF.416.8"; tss_id "TSS152";  |
| chr1 Cufflinks exon6298281 6299519 . | + | . | gene_id "XLOC_000109"; transcript_id "TCONS_00000209"; exon_number "5"; oId "CUFF.416.8"; tss_id "TSS152";  |
| chr1 Cufflinks exon6296300 6296396 . | + | . | gene_id "XLOC_000109"; transcript_id "TCONS_00000208"; exon_number "1"; oId "CUFF.416.10"; tss_id "TSS152"; |
| chr1 Cufflinks exon6297029 6297210 . | + | . | gene_id "XLOC_000109"; transcript_id "TCONS_00000208"; exon_number "2"; oId "CUFF.416.10"; tss_id "TSS152"; |
| chr1 Cufflinks exon6297305 6297405 . | + | . | gene_id "XLOC_000109"; transcript_id "TCONS_00000208"; exon_number "3"; oId "CUFF.416.10"; tss_id "TSS152"; |
| chr1 Cufflinks exon6297874 6297908 . | + | . | gene_id "XLOC_000109"; transcript_id "TCONS_00000208"; exon_number "4"; oId "CUFF.416.10"; tss_id "TSS152"; |
| chr1 Cufflinks exon6298281 6299519 . | + | . | gene_id "XLOC_000109"; transcript_id "TCONS_00000208"; exon_number "5"; oId "CUFF.416.10"; tss_id "TSS152"; |
| chr1 Cufflinks exon9687280 9687598 . | + | . | gene_id "XLOC_000150"; transcript_id "TCONS_00000279"; exon_number "1"; oId "CUFF.547.1"; tss_id "TSS201";  |
| chr1 Cufflinks exon9688538 9688639 . | + | . | gene_id "XLOC_000150"; transcript_id "TCONS_00000279"; exon_number "2"; oId "CUFF.547.1"; tss_id "TSS201";  |
| chr1 Cufflinks exon9690196 9690282 . | + | . | gene_id "XLOC_000150"; transcript_id "TCONS_00000279"; exon_number "3"; oId "CUFF.547.1"; tss_id "TSS201";  |
| chr1 Cufflinks exon9694052 9694130 . | + | . | gene_id "XLOC_000150"; transcript_id "TCONS_00000279"; exon_number "4"; oId "CUFF.547.1"; tss_id "TSS201";  |
| chr1 Cufflinks exon9695188 9696497 . | + | . | gene_id "XLOC_000150"; transcript_id "TCONS_00000279"; exon_number "5"; oId "CUFF.547.1"; tss_id "TSS201";  |
| chr1 Cufflinks exon9693146 9694130 . | + | . | gene_id "XLOC_000150"; transcript_id "TCONS_00000282"; exon_number "1"; oId "CUFF.547.2"; tss_id "TSS202";  |
| chr1 Cufflinks exon9695188 9696497 . | + | . | gene_id "XLOC_000150"; transcript_id "TCONS_00000282"; exon_number "2"; oId "CUFF.547.2"; tss_id "TSS202";  |

"CUFF.547.2"; tss\_id "TSS202";  
chr1 Cufflinks exon21992408 21992745 . + . gene\_id "XLOC\_000326"; transcript\_id "TCONS\_00000587"; exon\_number "1";  
oId "CUFF.1075.1"; tss\_id "TSS428";  
chr1 Cufflinks exon21997090 21999062 . + . gene\_id "XLOC\_000326"; transcript\_id "TCONS\_00000587"; exon\_number "2";  
oId "CUFF.1075.1"; tss\_id "TSS428";  
chr1 Cufflinks exon21999927 22001340 . + . gene\_id "XLOC\_000326"; transcript\_id "TCONS\_00000587"; exon\_number "3";  
oId "CUFF.1075.1"; tss\_id "TSS428";  
chr1 Cufflinks exon22338175 22338188 . + . gene\_id "XLOC\_000334"; transcript\_id "TCONS\_00000597"; exon\_number "1";  
oId "CUFF.1091.1"; tss\_id "TSS440";  
chr1 Cufflinks exon22353425 22353804 . + . gene\_id "XLOC\_000334"; transcript\_id "TCONS\_00000597"; exon\_number "2";  
oId "CUFF.1091.1"; tss\_id "TSS440";  
chr1 Cufflinks exon27974965 27975090 . + . gene\_id "XLOC\_000456"; transcript\_id "TCONS\_00000787"; exon\_number "1";  
oId "CUFF.1482.1"; tss\_id "TSS583";  
chr1 Cufflinks exon27975904 27976452 . + . gene\_id "XLOC\_000456"; transcript\_id "TCONS\_00000787"; exon\_number "2";  
oId "CUFF.1482.1"; tss\_id "TSS583";  
chr1 Cufflinks exon31191590 31192079 . + . gene\_id "XLOC\_000481"; transcript\_id "TCONS\_00000843"; exon\_number "1";  
oId "CUFF.1578.2"; tss\_id "TSS618";  
chr1 Cufflinks exon31194135 31198198 . + . gene\_id "XLOC\_000481"; transcript\_id "TCONS\_00000843"; exon\_number "2";  
oId "CUFF.1578.2"; tss\_id "TSS618";  
chr1 Cufflinks exon31191590 31192079 . + . gene\_id "XLOC\_000481"; transcript\_id "TCONS\_00000844"; exon\_number "1";  
oId "CUFF.1578.1"; tss\_id "TSS618";  
chr1 Cufflinks exon31194135 31194569 . + . gene\_id "XLOC\_000481"; transcript\_id "TCONS\_00000844"; exon\_number "2";  
oId "CUFF.1578.1"; tss\_id "TSS618";  
chr1 Cufflinks exon31198582 31198898 . + . gene\_id "XLOC\_000481"; transcript\_id "TCONS\_00000844"; exon\_number "3";  
oId "CUFF.1578.1"; tss\_id "TSS618";  
chr1 Cufflinks exon31199090 31199828 . + . gene\_id "XLOC\_000481"; transcript\_id "TCONS\_00000844"; exon\_number "4";  
oId "CUFF.1578.1"; tss\_id "TSS618";  
chr1 Cufflinks exon31191592 31194569 . + . gene\_id "XLOC\_000481"; transcript\_id "TCONS\_00000845"; exon\_number "1";  
oId "CUFF.1578.3"; tss\_id "TSS618";  
chr1 Cufflinks exon31198582 31198898 . + . gene\_id "XLOC\_000481"; transcript\_id "TCONS\_00000845"; exon\_number "2";  
oId "CUFF.1578.3"; tss\_id "TSS618";  
chr1 Cufflinks exon31199090 31199828 . + . gene\_id "XLOC\_000481"; transcript\_id "TCONS\_00000845"; exon\_number "3";  
oId "CUFF.1578.3"; tss\_id "TSS618";  
chr1 Cufflinks exon31191597 31192412 . + . gene\_id "XLOC\_000481"; transcript\_id "TCONS\_00000846"; exon\_number "1";  
oId "CUFF.1578.4"; tss\_id "TSS618";  
chr1 Cufflinks exon31194135 31198198 . + . gene\_id "XLOC\_000481"; transcript\_id "TCONS\_00000846"; exon\_number "2";  
oId "CUFF.1578.4"; tss\_id "TSS618";  
chr1 Cufflinks exon31191610 31192412 . + . gene\_id "XLOC\_000481"; transcript\_id "TCONS\_00000848"; exon\_number "1";  
oId "CUFF.1578.6"; tss\_id "TSS618";  
chr1 Cufflinks exon31194135 31194569 . + . gene\_id "XLOC\_000481"; transcript\_id "TCONS\_00000848"; exon\_number "2";  
oId "CUFF.1578.6"; tss\_id "TSS618";  
chr1 Cufflinks exon31198582 31198898 . + . gene\_id "XLOC\_000481"; transcript\_id "TCONS\_00000848"; exon\_number "3";  
oId "CUFF.1578.6"; tss\_id "TSS618";



|                                     |          |   |   |   |                                                                         |
|-------------------------------------|----------|---|---|---|-------------------------------------------------------------------------|
| chr1 Cufflinks exon31199090         | 31199828 | . | + | . | gene_id "XLOC_000481"; transcript_id "TCONS_00000848"; exon_number "4"; |
| oId "CUFF.1578.6"; tss_id "TSS618"; |          |   |   |   |                                                                         |
| chr1 Cufflinks exon31191610         | 31192412 | . | + | . | gene_id "XLOC_000481"; transcript_id "TCONS_00000847"; exon_number "1"; |
| oId "CUFF.1578.5"; tss_id "TSS618"; |          |   |   |   |                                                                         |
| chr1 Cufflinks exon31194134         | 31194569 | . | + | . | gene_id "XLOC_000481"; transcript_id "TCONS_00000847"; exon_number "2"; |
| oId "CUFF.1578.5"; tss_id "TSS618"; |          |   |   |   |                                                                         |
| chr1 Cufflinks exon31198582         | 31198898 | . | + | . | gene_id "XLOC_000481"; transcript_id "TCONS_00000847"; exon_number "3"; |
| oId "CUFF.1578.5"; tss_id "TSS618"; |          |   |   |   |                                                                         |
| chr1 Cufflinks exon31199090         | 31199828 | . | + | . | gene_id "XLOC_000481"; transcript_id "TCONS_00000847"; exon_number "4"; |
| oId "CUFF.1578.5"; tss_id "TSS618"; |          |   |   |   |                                                                         |
| chr1 Cufflinks exon31845971         | 31847234 | . | + | . | gene_id "XLOC_000483"; transcript_id "TCONS_00000852"; exon_number "1"; |
| oId "CUFF.1591.1"; tss_id "TSS620"; |          |   |   |   |                                                                         |
| chr1 Cufflinks exon31849659         | 31850327 | . | + | . | gene_id "XLOC_000483"; transcript_id "TCONS_00000852"; exon_number "2"; |
| oId "CUFF.1591.1"; tss_id "TSS620"; |          |   |   |   |                                                                         |
| chr1 Cufflinks exon32516026         | 32516586 | . | + | . | gene_id "XLOC_000502"; transcript_id "TCONS_00000883"; exon_number "1"; |
| oId "CUFF.1660.1"; tss_id "TSS644"; |          |   |   |   |                                                                         |
| chr1 Cufflinks exon32520957         | 32521858 | . | + | . | gene_id "XLOC_000502"; transcript_id "TCONS_00000883"; exon_number "2"; |
| oId "CUFF.1660.1"; tss_id "TSS644"; |          |   |   |   |                                                                         |
| chr1 Cufflinks exon32801009         | 32801105 | . | + | . | gene_id "XLOC_000518"; transcript_id "TCONS_00000906"; exon_number "1"; |
| oId "CUFF.1699.1"; tss_id "TSS664"; |          |   |   |   |                                                                         |
| chr1 Cufflinks exon32814007         | 32814696 | . | + | . | gene_id "XLOC_000518"; transcript_id "TCONS_00000906"; exon_number "2"; |
| oId "CUFF.1699.1"; tss_id "TSS664"; |          |   |   |   |                                                                         |
| chr1 Cufflinks exon32817441         | 32817729 | . | + | . | gene_id "XLOC_000520"; transcript_id "TCONS_00000910"; exon_number "1"; |
| oId "CUFF.1703.3"; tss_id "TSS668"; |          |   |   |   |                                                                         |
| chr1 Cufflinks exon32818313         | 32818403 | . | + | . | gene_id "XLOC_000520"; transcript_id "TCONS_00000910"; exon_number "2"; |
| oId "CUFF.1703.3"; tss_id "TSS668"; |          |   |   |   |                                                                         |
| chr1 Cufflinks exon32819057         | 32819142 | . | + | . | gene_id "XLOC_000520"; transcript_id "TCONS_00000910"; exon_number "3"; |
| oId "CUFF.1703.3"; tss_id "TSS668"; |          |   |   |   |                                                                         |
| chr1 Cufflinks exon32823976         | 32826838 | . | + | . | gene_id "XLOC_000520"; transcript_id "TCONS_00000910"; exon_number "4"; |
| oId "CUFF.1703.3"; tss_id "TSS668"; |          |   |   |   |                                                                         |
| chr1 Cufflinks exon33341656         | 33341816 | . | + | . | gene_id "XLOC_000532"; transcript_id "TCONS_00000935"; exon_number "1"; |
| oId "CUFF.1739.1"; tss_id "TSS687"; |          |   |   |   |                                                                         |
| chr1 Cufflinks exon33347500         | 33347634 | . | + | . | gene_id "XLOC_000532"; transcript_id "TCONS_00000935"; exon_number "2"; |
| oId "CUFF.1739.1"; tss_id "TSS687"; |          |   |   |   |                                                                         |
| chr1 Cufflinks exon33347766         | 33347823 | . | + | . | gene_id "XLOC_000532"; transcript_id "TCONS_00000935"; exon_number "3"; |
| oId "CUFF.1739.1"; tss_id "TSS687"; |          |   |   |   |                                                                         |
| chr1 Cufflinks exon33350368         | 33351305 | . | + | . | gene_id "XLOC_000532"; transcript_id "TCONS_00000935"; exon_number "4"; |
| oId "CUFF.1739.1"; tss_id "TSS687"; |          |   |   |   |                                                                         |
| chr1 Cufflinks exon33347509         | 33347634 | . | + | . | gene_id "XLOC_000532"; transcript_id "TCONS_00000941"; exon_number "1"; |
| oId "CUFF.1739.3"; tss_id "TSS688"; |          |   |   |   |                                                                         |
| chr1 Cufflinks exon33347766         | 33348334 | . | + | . | gene_id "XLOC_000532"; transcript_id "TCONS_00000941"; exon_number "2"; |
| oId "CUFF.1739.3"; tss_id "TSS688"; |          |   |   |   |                                                                         |
| chr1 Cufflinks exon33597291         | 33603477 | . | + | . | gene_id "XLOC_000540"; transcript_id "TCONS_00000952"; exon_number "1"; |

oId "CUFF.1766.1"; tss\_id "TSS699";  
chr1 Cufflinks exon33603668 33614873 . + . gene\_id "XLOC\_000540"; transcript\_id "TCONS\_00000952"; exon\_number "2";  
oId "CUFF.1766.1"; tss\_id "TSS699";  
chr1 Cufflinks exon33721225 33721417 . + . gene\_id "XLOC\_000543"; transcript\_id "TCONS\_00000955"; exon\_number "1";  
oId "CUFF.1773.1"; tss\_id "TSS702";  
chr1 Cufflinks exon33734897 33735309 . + . gene\_id "XLOC\_000543"; transcript\_id "TCONS\_00000955"; exon\_number "2";  
oId "CUFF.1773.1"; tss\_id "TSS702";  
chr1 Cufflinks exon47644922 47645110 . + . gene\_id "XLOC\_000736"; transcript\_id "TCONS\_00001345"; exon\_number "1";  
oId "CUFF.2550.3"; tss\_id "TSS954";  
chr1 Cufflinks exon47645537 47646011 . + . gene\_id "XLOC\_000736"; transcript\_id "TCONS\_00001345"; exon\_number "2";  
oId "CUFF.2550.3"; tss\_id "TSS954";  
chr1 Cufflinks exon47644922 47645110 . + . gene\_id "XLOC\_000736"; transcript\_id "TCONS\_00001344"; exon\_number "1";  
oId "CUFF.2550.2"; tss\_id "TSS954";  
chr1 Cufflinks exon47645540 47646011 . + . gene\_id "XLOC\_000736"; transcript\_id "TCONS\_00001344"; exon\_number "2";  
oId "CUFF.2550.2"; tss\_id "TSS954";  
chr1 Cufflinks exon47644922 47645172 . + . gene\_id "XLOC\_000736"; transcript\_id "TCONS\_00001343"; exon\_number "1";  
oId "CUFF.2550.1"; tss\_id "TSS954";  
chr1 Cufflinks exon47645540 47646011 . + . gene\_id "XLOC\_000736"; transcript\_id "TCONS\_00001343"; exon\_number "2";  
oId "CUFF.2550.1"; tss\_id "TSS954";  
chr1 Cufflinks exon59486046 59486295 . + . gene\_id "XLOC\_000813"; transcript\_id "TCONS\_00001453"; exon\_number "1";  
oId "CUFF.2939.2"; tss\_id "TSS1045";  
chr1 Cufflinks exon59487160 59487249 . + . gene\_id "XLOC\_000813"; transcript\_id "TCONS\_00001453"; exon\_number "2";  
oId "CUFF.2939.2"; tss\_id "TSS1045";  
chr1 Cufflinks exon59498533 59498582 . + . gene\_id "XLOC\_000813"; transcript\_id "TCONS\_00001453"; exon\_number "3";  
oId "CUFF.2939.2"; tss\_id "TSS1045";  
chr1 Cufflinks exon59486046 59486295 . + . gene\_id "XLOC\_000813"; transcript\_id "TCONS\_00001454"; exon\_number "1";  
oId "CUFF.2939.1"; tss\_id "TSS1045";  
chr1 Cufflinks exon59487160 59487249 . + . gene\_id "XLOC\_000813"; transcript\_id "TCONS\_00001454"; exon\_number "2";  
oId "CUFF.2939.1"; tss\_id "TSS1045";  
chr1 Cufflinks exon59488656 59488789 . + . gene\_id "XLOC\_000813"; transcript\_id "TCONS\_00001454"; exon\_number "3";  
oId "CUFF.2939.1"; tss\_id "TSS1045";  
chr1 Cufflinks exon59507844 59507902 . + . gene\_id "XLOC\_000813"; transcript\_id "TCONS\_00001454"; exon\_number "4";  
oId "CUFF.2939.1"; tss\_id "TSS1045";  
chr1 Cufflinks exon59527787 59527830 . + . gene\_id "XLOC\_000813"; transcript\_id "TCONS\_00001454"; exon\_number "5";  
oId "CUFF.2939.1"; tss\_id "TSS1045";  
chr1 Cufflinks exon59486093 59486295 . + . gene\_id "XLOC\_000813"; transcript\_id "TCONS\_00001455"; exon\_number "1";  
oId "CUFF.2939.4"; tss\_id "TSS1045";  
chr1 Cufflinks exon59487160 59487249 . + . gene\_id "XLOC\_000813"; transcript\_id "TCONS\_00001455"; exon\_number "2";  
oId "CUFF.2939.4"; tss\_id "TSS1045";  
chr1 Cufflinks exon59507844 59507902 . + . gene\_id "XLOC\_000813"; transcript\_id "TCONS\_00001455"; exon\_number "3";  
oId "CUFF.2939.4"; tss\_id "TSS1045";  
chr1 Cufflinks exon59511117 59511203 . + . gene\_id "XLOC\_000813"; transcript\_id "TCONS\_00001455"; exon\_number "4";  
oId "CUFF.2939.4"; tss\_id "TSS1045";

|                                      |          |   |   |   |                                                                         |
|--------------------------------------|----------|---|---|---|-------------------------------------------------------------------------|
| chr1 Cufflinks exon59511836          | 59513940 | . | + | . | gene_id "XLOC_000813"; transcript_id "TCONS_00001455"; exon_number "5"; |
| oId "CUFF.2939.4"; tss_id "TSS1045"; |          |   |   |   |                                                                         |
| chr1 Cufflinks exon59486093          | 59486295 | . | + | . | gene_id "XLOC_000813"; transcript_id "TCONS_00001456"; exon_number "1"; |
| oId "CUFF.2939.5"; tss_id "TSS1045"; |          |   |   |   |                                                                         |
| chr1 Cufflinks exon59487160          | 59487249 | . | + | . | gene_id "XLOC_000813"; transcript_id "TCONS_00001456"; exon_number "2"; |
| oId "CUFF.2939.5"; tss_id "TSS1045"; |          |   |   |   |                                                                         |
| chr1 Cufflinks exon59569184          | 59569450 | . | + | . | gene_id "XLOC_000813"; transcript_id "TCONS_00001456"; exon_number "3"; |
| oId "CUFF.2939.5"; tss_id "TSS1045"; |          |   |   |   |                                                                         |
| chr1 Cufflinks exon59486148          | 59486295 | . | + | . | gene_id "XLOC_000813"; transcript_id "TCONS_00001457"; exon_number "1"; |
| oId "CUFF.2939.6"; tss_id "TSS1046"; |          |   |   |   |                                                                         |
| chr1 Cufflinks exon59487160          | 59487249 | . | + | . | gene_id "XLOC_000813"; transcript_id "TCONS_00001457"; exon_number "2"; |
| oId "CUFF.2939.6"; tss_id "TSS1046"; |          |   |   |   |                                                                         |
| chr1 Cufflinks exon59553687          | 59553919 | . | + | . | gene_id "XLOC_000813"; transcript_id "TCONS_00001457"; exon_number "3"; |
| oId "CUFF.2939.6"; tss_id "TSS1046"; |          |   |   |   |                                                                         |
| chr1 Cufflinks exon60559716          | 60560316 | . | + | . | gene_id "XLOC_000823"; transcript_id "TCONS_00001473"; exon_number "1"; |
| oId "CUFF.2969.1"; tss_id "TSS1058"; |          |   |   |   |                                                                         |
| chr1 Cufflinks exon60563066          | 60564163 | . | + | . | gene_id "XLOC_000823"; transcript_id "TCONS_00001473"; exon_number "2"; |
| oId "CUFF.2969.1"; tss_id "TSS1058"; |          |   |   |   |                                                                         |
| chr1 Cufflinks exon66902249          | 66902386 | . | + | . | gene_id "XLOC_000866"; transcript_id "TCONS_00001545"; exon_number "1"; |
| oId "CUFF.3130.1"; tss_id "TSS1119"; |          |   |   |   |                                                                         |
| chr1 Cufflinks exon66905123          | 66905334 | . | + | . | gene_id "XLOC_000866"; transcript_id "TCONS_00001545"; exon_number "2"; |
| oId "CUFF.3130.1"; tss_id "TSS1119"; |          |   |   |   |                                                                         |
| chr1 Cufflinks exon90223392          | 90224499 | . | + | . | gene_id "XLOC_000996"; transcript_id "TCONS_00001787"; exon_number "1"; |
| oId "CUFF.3773.2"; tss_id "TSS1295"; |          |   |   |   |                                                                         |
| chr1 Cufflinks exon90227562          | 90230703 | . | + | . | gene_id "XLOC_000996"; transcript_id "TCONS_00001787"; exon_number "2"; |
| oId "CUFF.3773.2"; tss_id "TSS1295"; |          |   |   |   |                                                                         |
| chr1 Cufflinks exon90223392          | 90223693 | . | + | . | gene_id "XLOC_000996"; transcript_id "TCONS_00001786"; exon_number "1"; |
| oId "CUFF.3773.1"; tss_id "TSS1295"; |          |   |   |   |                                                                         |
| chr1 Cufflinks exon90224416          | 90224499 | . | + | . | gene_id "XLOC_000996"; transcript_id "TCONS_00001786"; exon_number "2"; |
| oId "CUFF.3773.1"; tss_id "TSS1295"; |          |   |   |   |                                                                         |
| chr1 Cufflinks exon90227562          | 90230703 | . | + | . | gene_id "XLOC_000996"; transcript_id "TCONS_00001786"; exon_number "3"; |
| oId "CUFF.3773.1"; tss_id "TSS1295"; |          |   |   |   |                                                                         |
| chr1 Cufflinks exon95392890          | 95393958 | . | + | . | gene_id "XLOC_001061"; transcript_id "TCONS_00001878"; exon_number "1"; |
| oId "CUFF.4060.1"; tss_id "TSS1371"; |          |   |   |   |                                                                         |
| chr1 Cufflinks exon95397428          | 95397541 | . | + | . | gene_id "XLOC_001061"; transcript_id "TCONS_00001878"; exon_number "2"; |
| oId "CUFF.4060.1"; tss_id "TSS1371"; |          |   |   |   |                                                                         |
| chr1 Cufflinks exon95426873          | 95426989 | . | + | . | gene_id "XLOC_001061"; transcript_id "TCONS_00001878"; exon_number "3"; |
| oId "CUFF.4060.1"; tss_id "TSS1371"; |          |   |   |   |                                                                         |
| chr1 Cufflinks exon95428535          | 95428826 | . | + | . | gene_id "XLOC_001061"; transcript_id "TCONS_00001878"; exon_number "4"; |
| oId "CUFF.4060.1"; tss_id "TSS1371"; |          |   |   |   |                                                                         |
| chr1 Cufflinks exon95392911          | 95393958 | . | + | . | gene_id "XLOC_001061"; transcript_id "TCONS_00001879"; exon_number "1"; |
| oId "CUFF.4060.2"; tss_id "TSS1371"; |          |   |   |   |                                                                         |
| chr1 Cufflinks exon95397428          | 95397541 | . | + | . | gene_id "XLOC_001061"; transcript_id "TCONS_00001879"; exon_number "2"; |

oId "CUFF.4060.2"; tss\_id "TSS1371";  
chr1 Cufflinks exon95428535 95428826 . + . gene\_id "XLOC\_001061"; transcript\_id "TCONS\_00001879"; exon\_number "3";  
oId "CUFF.4060.2"; tss\_id "TSS1371";  
chr1 Cufflinks exon95393584 95393958 . + . gene\_id "XLOC\_001061"; transcript\_id "TCONS\_00001880"; exon\_number "1";  
oId "CUFF.4060.3"; tss\_id "TSS1372";  
chr1 Cufflinks exon95397428 95397541 . + . gene\_id "XLOC\_001061"; transcript\_id "TCONS\_00001880"; exon\_number "2";  
oId "CUFF.4060.3"; tss\_id "TSS1372";  
chr1 Cufflinks exon95426873 95426989 . + . gene\_id "XLOC\_001061"; transcript\_id "TCONS\_00001880"; exon\_number "3";  
oId "CUFF.4060.3"; tss\_id "TSS1372";  
chr1 Cufflinks exon95428481 95428826 . + . gene\_id "XLOC\_001061"; transcript\_id "TCONS\_00001880"; exon\_number "4";  
oId "CUFF.4060.3"; tss\_id "TSS1372";  
chr1 Cufflinks exon101491402 101491617 . + . gene\_id "XLOC\_001113"; transcript\_id "TCONS\_00001964"; exon\_number "1";  
oId "CUFF.4188.3"; tss\_id "TSS1429";  
chr1 Cufflinks exon101552408 101552935 . + . gene\_id "XLOC\_001113"; transcript\_id "TCONS\_00001964"; exon\_number "2";  
oId "CUFF.4188.3"; tss\_id "TSS1429";  
chr1 Cufflinks exon101491402 101491617 . + . gene\_id "XLOC\_001113"; transcript\_id "TCONS\_00001965"; exon\_number "1";  
oId "CUFF.4188.4"; tss\_id "TSS1429";  
chr1 Cufflinks exon101538216 101538386 . + . gene\_id "XLOC\_001113"; transcript\_id "TCONS\_00001965"; exon\_number "2";  
oId "CUFF.4188.4"; tss\_id "TSS1429";  
chr1 Cufflinks exon101540951 101541272 . + . gene\_id "XLOC\_001113"; transcript\_id "TCONS\_00001965"; exon\_number "3";  
oId "CUFF.4188.4"; tss\_id "TSS1429";  
chr1 Cufflinks exon101542919 101543064 . + . gene\_id "XLOC\_001113"; transcript\_id "TCONS\_00001965"; exon\_number "4";  
oId "CUFF.4188.4"; tss\_id "TSS1429";  
chr1 Cufflinks exon101549017 101549130 . + . gene\_id "XLOC\_001113"; transcript\_id "TCONS\_00001965"; exon\_number "5";  
oId "CUFF.4188.4"; tss\_id "TSS1429";  
chr1 Cufflinks exon101552408 101552935 . + . gene\_id "XLOC\_001113"; transcript\_id "TCONS\_00001965"; exon\_number "6";  
oId "CUFF.4188.4"; tss\_id "TSS1429";  
chr1 Cufflinks exon101491402 101491617 . + . gene\_id "XLOC\_001113"; transcript\_id "TCONS\_00001963"; exon\_number "1";  
oId "CUFF.4188.2"; tss\_id "TSS1429";  
chr1 Cufflinks exon101540951 101541272 . + . gene\_id "XLOC\_001113"; transcript\_id "TCONS\_00001963"; exon\_number "2";  
oId "CUFF.4188.2"; tss\_id "TSS1429";  
chr1 Cufflinks exon101542919 101543064 . + . gene\_id "XLOC\_001113"; transcript\_id "TCONS\_00001963"; exon\_number "3";  
oId "CUFF.4188.2"; tss\_id "TSS1429";  
chr1 Cufflinks exon101549017 101549130 . + . gene\_id "XLOC\_001113"; transcript\_id "TCONS\_00001963"; exon\_number "4";  
oId "CUFF.4188.2"; tss\_id "TSS1429";  
chr1 Cufflinks exon101552408 101552935 . + . gene\_id "XLOC\_001113"; transcript\_id "TCONS\_00001963"; exon\_number "5";  
oId "CUFF.4188.2"; tss\_id "TSS1429";  
chr1 Cufflinks exon101491402 101491617 . + . gene\_id "XLOC\_001113"; transcript\_id "TCONS\_00001962"; exon\_number "1";  
oId "CUFF.4188.1"; tss\_id "TSS1429";  
chr1 Cufflinks exon101542919 101543064 . + . gene\_id "XLOC\_001113"; transcript\_id "TCONS\_00001962"; exon\_number "2";  
oId "CUFF.4188.1"; tss\_id "TSS1429";  
chr1 Cufflinks exon101552408 101552935 . + . gene\_id "XLOC\_001113"; transcript\_id "TCONS\_00001962"; exon\_number "3";  
oId "CUFF.4188.1"; tss\_id "TSS1429";

chr1 Cufflinks exon101540895 101540950 . + . gene\_id "XLOC\_001113"; transcript\_id "TCONS\_00001967"; exon\_number "1";  
oId "CUFF.4188.5"; tss\_id "TSS1430";  
chr1 Cufflinks exon101542919 101543064 . + . gene\_id "XLOC\_001113"; transcript\_id "TCONS\_00001967"; exon\_number "2";  
oId "CUFF.4188.5"; tss\_id "TSS1430";  
chr1 Cufflinks exon101545945 101546169 . + . gene\_id "XLOC\_001113"; transcript\_id "TCONS\_00001967"; exon\_number "3";  
oId "CUFF.4188.5"; tss\_id "TSS1430";  
chr1 Cufflinks exon101549017 101549130 . + . gene\_id "XLOC\_001113"; transcript\_id "TCONS\_00001967"; exon\_number "4";  
oId "CUFF.4188.5"; tss\_id "TSS1430";  
chr1 Cufflinks exon101552408 101552935 . + . gene\_id "XLOC\_001113"; transcript\_id "TCONS\_00001967"; exon\_number "5";  
oId "CUFF.4188.5"; tss\_id "TSS1430";  
chr1 Cufflinks exon101763214 101763239 . + . gene\_id "XLOC\_001122"; transcript\_id "TCONS\_00001976"; exon\_number "1";  
oId "CUFF.4212.1"; tss\_id "TSS1439";  
chr1 Cufflinks exon101785854 101785970 . + . gene\_id "XLOC\_001122"; transcript\_id "TCONS\_00001976"; exon\_number "2";  
oId "CUFF.4212.1"; tss\_id "TSS1439";  
chr1 Cufflinks exon101788892 101789022 . + . gene\_id "XLOC\_001122"; transcript\_id "TCONS\_00001976"; exon\_number "3";  
oId "CUFF.4212.1"; tss\_id "TSS1439";  
chr1 Cufflinks exon101815603 101815741 . + . gene\_id "XLOC\_001122"; transcript\_id "TCONS\_00001976"; exon\_number "4";  
oId "CUFF.4212.1"; tss\_id "TSS1439";  
chr1 Cufflinks exon101855226 101859171 . + . gene\_id "XLOC\_001122"; transcript\_id "TCONS\_00001976"; exon\_number "5";  
oId "CUFF.4212.1"; tss\_id "TSS1439";  
chr1 Cufflinks exon101774522 101774574 . + . gene\_id "XLOC\_001122"; transcript\_id "TCONS\_00001977"; exon\_number "1";  
oId "CUFF.4212.2"; tss\_id "TSS1440";  
chr1 Cufflinks exon101803794 101803854 . + . gene\_id "XLOC\_001122"; transcript\_id "TCONS\_00001977"; exon\_number "2";  
oId "CUFF.4212.2"; tss\_id "TSS1440";  
chr1 Cufflinks exon101815603 101815741 . + . gene\_id "XLOC\_001122"; transcript\_id "TCONS\_00001977"; exon\_number "3";  
oId "CUFF.4212.2"; tss\_id "TSS1440";  
chr1 Cufflinks exon101855226 101859171 . + . gene\_id "XLOC\_001122"; transcript\_id "TCONS\_00001977"; exon\_number "4";  
oId "CUFF.4212.2"; tss\_id "TSS1440";  
chr1 Cufflinks exon101777404 101777483 . + . gene\_id "XLOC\_001122"; transcript\_id "TCONS\_00001978"; exon\_number "1";  
oId "CUFF.4212.3"; tss\_id "TSS1441";  
chr1 Cufflinks exon101788892 101789022 . + . gene\_id "XLOC\_001122"; transcript\_id "TCONS\_00001978"; exon\_number "2";  
oId "CUFF.4212.3"; tss\_id "TSS1441";  
chr1 Cufflinks exon101815603 101815741 . + . gene\_id "XLOC\_001122"; transcript\_id "TCONS\_00001978"; exon\_number "3";  
oId "CUFF.4212.3"; tss\_id "TSS1441";  
chr1 Cufflinks exon101855226 101859171 . + . gene\_id "XLOC\_001122"; transcript\_id "TCONS\_00001978"; exon\_number "4";  
oId "CUFF.4212.3"; tss\_id "TSS1441";  
chr1 Cufflinks exon101778622 101778661 . + . gene\_id "XLOC\_001122"; transcript\_id "TCONS\_00001979"; exon\_number "1";  
oId "CUFF.4212.4"; tss\_id "TSS1442";  
chr1 Cufflinks exon101815603 101815741 . + . gene\_id "XLOC\_001122"; transcript\_id "TCONS\_00001979"; exon\_number "2";  
oId "CUFF.4212.4"; tss\_id "TSS1442";  
chr1 Cufflinks exon101855226 101859171 . + . gene\_id "XLOC\_001122"; transcript\_id "TCONS\_00001979"; exon\_number "3";  
oId "CUFF.4212.4"; tss\_id "TSS1442";  
chr1 Cufflinks exon101789189 101789431 . + . gene\_id "XLOC\_001122"; transcript\_id "TCONS\_00001983"; exon\_number "1";

oId "CUFF.4212.6"; tss\_id "TSS1443";  
chr1 Cufflinks exon101815603 101815741 . + . gene\_id "XLOC\_001122"; transcript\_id "TCONS\_00001983"; exon\_number "2";  
oId "CUFF.4212.6"; tss\_id "TSS1443";  
chr1 Cufflinks exon101855226 101859171 . + . gene\_id "XLOC\_001122"; transcript\_id "TCONS\_00001983"; exon\_number "3";  
oId "CUFF.4212.6"; tss\_id "TSS1443";  
chr1 Cufflinks exon101789393 101789431 . + . gene\_id "XLOC\_001122"; transcript\_id "TCONS\_00001984"; exon\_number "1";  
oId "CUFF.4212.8"; tss\_id "TSS1444";  
chr1 Cufflinks exon101803794 101803854 . + . gene\_id "XLOC\_001122"; transcript\_id "TCONS\_00001984"; exon\_number "2";  
oId "CUFF.4212.8"; tss\_id "TSS1444";  
chr1 Cufflinks exon101809395 101809551 . + . gene\_id "XLOC\_001122"; transcript\_id "TCONS\_00001984"; exon\_number "3";  
oId "CUFF.4212.8"; tss\_id "TSS1444";  
chr1 Cufflinks exon101811319 101811401 . + . gene\_id "XLOC\_001122"; transcript\_id "TCONS\_00001984"; exon\_number "4";  
oId "CUFF.4212.8"; tss\_id "TSS1444";  
chr1 Cufflinks exon101815603 101815741 . + . gene\_id "XLOC\_001122"; transcript\_id "TCONS\_00001984"; exon\_number "5";  
oId "CUFF.4212.8"; tss\_id "TSS1444";  
chr1 Cufflinks exon101842814 101842898 . + . gene\_id "XLOC\_001122"; transcript\_id "TCONS\_00001984"; exon\_number "6";  
oId "CUFF.4212.8"; tss\_id "TSS1444";  
chr1 Cufflinks exon101855226 101859171 . + . gene\_id "XLOC\_001122"; transcript\_id "TCONS\_00001984"; exon\_number "7";  
oId "CUFF.4212.8"; tss\_id "TSS1444";  
chr1 Cufflinks exon101812727 101812887 . + . gene\_id "XLOC\_001122"; transcript\_id "TCONS\_00001989"; exon\_number "1";  
oId "CUFF.4212.9"; tss\_id "TSS1445";  
chr1 Cufflinks exon101814920 101815063 . + . gene\_id "XLOC\_001122"; transcript\_id "TCONS\_00001989"; exon\_number "2";  
oId "CUFF.4212.9"; tss\_id "TSS1445";  
chr1 Cufflinks exon101815603 101815741 . + . gene\_id "XLOC\_001122"; transcript\_id "TCONS\_00001989"; exon\_number "3";  
oId "CUFF.4212.9"; tss\_id "TSS1445";  
chr1 Cufflinks exon101855226 101859171 . + . gene\_id "XLOC\_001122"; transcript\_id "TCONS\_00001989"; exon\_number "4";  
oId "CUFF.4212.9"; tss\_id "TSS1445";  
chr1 Cufflinks exon101814815 101815063 . + . gene\_id "XLOC\_001122"; transcript\_id "TCONS\_00001990"; exon\_number "1";  
oId "CUFF.4212.11"; tss\_id "TSS1446";  
chr1 Cufflinks exon101815603 101815741 . + . gene\_id "XLOC\_001122"; transcript\_id "TCONS\_00001990"; exon\_number "2";  
oId "CUFF.4212.11"; tss\_id "TSS1446";  
chr1 Cufflinks exon101842814 101842898 . + . gene\_id "XLOC\_001122"; transcript\_id "TCONS\_00001990"; exon\_number "3";  
oId "CUFF.4212.11"; tss\_id "TSS1446";  
chr1 Cufflinks exon101855226 101859171 . + . gene\_id "XLOC\_001122"; transcript\_id "TCONS\_00001990"; exon\_number "4";  
oId "CUFF.4212.11"; tss\_id "TSS1446";  
chr1 Cufflinks exon101837016 101837079 . + . gene\_id "XLOC\_001122"; transcript\_id "TCONS\_00001992"; exon\_number "1";  
oId "CUFF.4212.13"; tss\_id "TSS1447";  
chr1 Cufflinks exon101848974 101849106 . + . gene\_id "XLOC\_001122"; transcript\_id "TCONS\_00001992"; exon\_number "2";  
oId "CUFF.4212.13"; tss\_id "TSS1447";  
chr1 Cufflinks exon101855226 101859171 . + . gene\_id "XLOC\_001122"; transcript\_id "TCONS\_00001992"; exon\_number "3";  
oId "CUFF.4212.13"; tss\_id "TSS1447";  
chr1 Cufflinks exon101848758 101849102 . + . gene\_id "XLOC\_001122"; transcript\_id "TCONS\_00001994"; exon\_number "1";  
oId "CUFF.4212.14"; tss\_id "TSS1448";

chr1 Cufflinks exon101855226 101859171 . + . gene\_id "XLOC\_001122"; transcript\_id "TCONS\_00001994"; exon\_number "2";  
oId "CUFF.4212.14"; tss\_id "TSS1448";

chr1 Cufflinks exon108506980 108507126 . + . gene\_id "XLOC\_001149"; transcript\_id "TCONS\_00002020"; exon\_number "1";  
oId "CUFF.4293.1"; tss\_id "TSS1477";

chr1 Cufflinks exon108535349 108535384 . + . gene\_id "XLOC\_001149"; transcript\_id "TCONS\_00002020"; exon\_number "2";  
oId "CUFF.4293.1"; tss\_id "TSS1477";

chr1 Cufflinks exon108536127 108536257 . + . gene\_id "XLOC\_001149"; transcript\_id "TCONS\_00002020"; exon\_number "3";  
oId "CUFF.4293.1"; tss\_id "TSS1477";

chr1 Cufflinks exon108536804 108537229 . + . gene\_id "XLOC\_001149"; transcript\_id "TCONS\_00002020"; exon\_number "4";  
oId "CUFF.4293.1"; tss\_id "TSS1477";

chr1 Cufflinks exon108507065 108507126 . + . gene\_id "XLOC\_001149"; transcript\_id "TCONS\_00002021"; exon\_number "1";  
oId "CUFF.4293.2"; tss\_id "TSS1477";

chr1 Cufflinks exon108536127 108536257 . + . gene\_id "XLOC\_001149"; transcript\_id "TCONS\_00002021"; exon\_number "2";  
oId "CUFF.4293.2"; tss\_id "TSS1477";

chr1 Cufflinks exon108536804 108537229 . + . gene\_id "XLOC\_001149"; transcript\_id "TCONS\_00002021"; exon\_number "3";  
oId "CUFF.4293.2"; tss\_id "TSS1477";

chr1 Cufflinks exon108592932 108593357 . + . gene\_id "XLOC\_001157"; transcript\_id "TCONS\_00002030"; exon\_number "1";  
oId "CUFF.4315.2"; tss\_id "TSS1485";

chr1 Cufflinks exon108609479 108609658 . + . gene\_id "XLOC\_001157"; transcript\_id "TCONS\_00002030"; exon\_number "2";  
oId "CUFF.4315.2"; tss\_id "TSS1485";

chr1 Cufflinks exon108614106 108614259 . + . gene\_id "XLOC\_001157"; transcript\_id "TCONS\_00002030"; exon\_number "3";  
oId "CUFF.4315.2"; tss\_id "TSS1485";

chr1 Cufflinks exon108615171 108615319 . + . gene\_id "XLOC\_001157"; transcript\_id "TCONS\_00002030"; exon\_number "4";  
oId "CUFF.4315.2"; tss\_id "TSS1485";

chr1 Cufflinks exon108617015 108617080 . + . gene\_id "XLOC\_001157"; transcript\_id "TCONS\_00002030"; exon\_number "5";  
oId "CUFF.4315.2"; tss\_id "TSS1485";

chr1 Cufflinks exon108592932 108593357 . + . gene\_id "XLOC\_001157"; transcript\_id "TCONS\_00002029"; exon\_number "1";  
oId "CUFF.4315.1"; tss\_id "TSS1485";

chr1 Cufflinks exon108614106 108614259 . + . gene\_id "XLOC\_001157"; transcript\_id "TCONS\_00002029"; exon\_number "2";  
oId "CUFF.4315.1"; tss\_id "TSS1485";

chr1 Cufflinks exon108615160 108615319 . + . gene\_id "XLOC\_001157"; transcript\_id "TCONS\_00002029"; exon\_number "3";  
oId "CUFF.4315.1"; tss\_id "TSS1485";

chr1 Cufflinks exon108617015 108617080 . + . gene\_id "XLOC\_001157"; transcript\_id "TCONS\_00002029"; exon\_number "4";  
oId "CUFF.4315.1"; tss\_id "TSS1485";

chr1 Cufflinks exon109642815 109642891 . + . gene\_id "XLOC\_001170"; transcript\_id "TCONS\_00002050"; exon\_number "1";  
oId "CUFF.4374.1"; tss\_id "TSS1500";

chr1 Cufflinks exon109645124 109646304 . + . gene\_id "XLOC\_001170"; transcript\_id "TCONS\_00002050"; exon\_number "2";  
oId "CUFF.4374.1"; tss\_id "TSS1500";

chr1 Cufflinks exon110331813 110332866 . + . gene\_id "XLOC\_001196"; transcript\_id "TCONS\_00002102"; exon\_number "1";  
oId "CUFF.4434.1"; tss\_id "TSS1531";

chr1 Cufflinks exon110375922 110376037 . + . gene\_id "XLOC\_001196"; transcript\_id "TCONS\_00002102"; exon\_number "2";  
oId "CUFF.4434.1"; tss\_id "TSS1531";

chr1 Cufflinks exon110425260 110428692 . + . gene\_id "XLOC\_001196"; transcript\_id "TCONS\_00002102"; exon\_number "3";

oId "CUFF.4434.1"; tss\_id "TSS1531";  
chr1 Cufflinks exon113499016 113500344 . + . gene\_id "XLOC\_001265"; transcript\_id "TCONS\_00002221"; exon\_number "1";  
oId "CUFF.4648.2"; tss\_id "TSS1621";  
chr1 Cufflinks exon113503099 113503197 . + . gene\_id "XLOC\_001265"; transcript\_id "TCONS\_00002221"; exon\_number "2";  
oId "CUFF.4648.2"; tss\_id "TSS1621";  
chr1 Cufflinks exon113517406 113518172 . + . gene\_id "XLOC\_001265"; transcript\_id "TCONS\_00002221"; exon\_number "3";  
oId "CUFF.4648.2"; tss\_id "TSS1621";  
chr1 Cufflinks exon113499016 113499578 . + . gene\_id "XLOC\_001265"; transcript\_id "TCONS\_00002220"; exon\_number "1";  
oId "CUFF.4648.1"; tss\_id "TSS1621";  
chr1 Cufflinks exon113503099 113503197 . + . gene\_id "XLOC\_001265"; transcript\_id "TCONS\_00002220"; exon\_number "2";  
oId "CUFF.4648.1"; tss\_id "TSS1621";  
chr1 Cufflinks exon113510657 113518172 . + . gene\_id "XLOC\_001265"; transcript\_id "TCONS\_00002220"; exon\_number "3";  
oId "CUFF.4648.1"; tss\_id "TSS1621";  
chr1 Cufflinks exon113499019 113499578 . + . gene\_id "XLOC\_001265"; transcript\_id "TCONS\_00002222"; exon\_number "1";  
oId "CUFF.4648.3"; tss\_id "TSS1621";  
chr1 Cufflinks exon113500181 113500344 . + . gene\_id "XLOC\_001265"; transcript\_id "TCONS\_00002222"; exon\_number "2";  
oId "CUFF.4648.3"; tss\_id "TSS1621";  
chr1 Cufflinks exon113503099 113503197 . + . gene\_id "XLOC\_001265"; transcript\_id "TCONS\_00002222"; exon\_number "3";  
oId "CUFF.4648.3"; tss\_id "TSS1621";  
chr1 Cufflinks exon113510657 113518172 . + . gene\_id "XLOC\_001265"; transcript\_id "TCONS\_00002222"; exon\_number "4";  
oId "CUFF.4648.3"; tss\_id "TSS1621";  
chr1 Cufflinks exon113499037 113500344 . + . gene\_id "XLOC\_001265"; transcript\_id "TCONS\_00002224"; exon\_number "1";  
oId "CUFF.4648.5"; tss\_id "TSS1621";  
chr1 Cufflinks exon113503099 113503197 . + . gene\_id "XLOC\_001265"; transcript\_id "TCONS\_00002224"; exon\_number "2";  
oId "CUFF.4648.5"; tss\_id "TSS1621";  
chr1 Cufflinks exon113506594 113506690 . + . gene\_id "XLOC\_001265"; transcript\_id "TCONS\_00002224"; exon\_number "3";  
oId "CUFF.4648.5"; tss\_id "TSS1621";  
chr1 Cufflinks exon113499037 113499578 . + . gene\_id "XLOC\_001265"; transcript\_id "TCONS\_00002223"; exon\_number "1";  
oId "CUFF.4648.4"; tss\_id "TSS1621";  
chr1 Cufflinks exon113503099 113503197 . + . gene\_id "XLOC\_001265"; transcript\_id "TCONS\_00002223"; exon\_number "2";  
oId "CUFF.4648.4"; tss\_id "TSS1621";  
chr1 Cufflinks exon113506594 113506690 . + . gene\_id "XLOC\_001265"; transcript\_id "TCONS\_00002223"; exon\_number "3";  
oId "CUFF.4648.4"; tss\_id "TSS1621";  
chr1 Cufflinks exon116047910 116048381 . + . gene\_id "XLOC\_001293"; transcript\_id "TCONS\_00002270"; exon\_number "1";  
oId "CUFF.4770.1"; tss\_id "TSS1656";  
chr1 Cufflinks exon116077323 116077596 . + . gene\_id "XLOC\_001293"; transcript\_id "TCONS\_00002270"; exon\_number "2";  
oId "CUFF.4770.1"; tss\_id "TSS1656";  
chr1 Cufflinks exon120837799 120838005 . + . gene\_id "XLOC\_001351"; transcript\_id "TCONS\_00002343"; exon\_number "1";  
oId "CUFF.4995.1"; tss\_id "TSS1720";  
chr1 Cufflinks exon120838291 120838869 . + . gene\_id "XLOC\_001351"; transcript\_id "TCONS\_00002343"; exon\_number "2";  
oId "CUFF.4995.1"; tss\_id "TSS1720";  
chr1 Cufflinks exon146644268 146645138 . + . gene\_id "XLOC\_001452"; transcript\_id "TCONS\_00002492"; exon\_number "1";  
oId "CUFF.5381.1"; tss\_id "TSS1841";



|                                      |           |   |   |   |                                                                         |
|--------------------------------------|-----------|---|---|---|-------------------------------------------------------------------------|
| chr1 Cufflinks exon146646003         | 146646164 | . | + | . | gene_id "XLOC_001452"; transcript_id "TCONS_00002492"; exon_number "2"; |
| oId "CUFF.5381.1"; tss_id "TSS1841"; |           |   |   |   |                                                                         |
| chr1 Cufflinks exon146686123         | 146686370 | . | + | . | gene_id "XLOC_001452"; transcript_id "TCONS_00002492"; exon_number "3"; |
| oId "CUFF.5381.1"; tss_id "TSS1841"; |           |   |   |   |                                                                         |
| chr1 Cufflinks exon149287130         | 149288896 | . | + | . | gene_id "XLOC_001494"; transcript_id "TCONS_00002563"; exon_number "1"; |
| oId "CUFF.5520.2"; tss_id "TSS1892"; |           |   |   |   |                                                                         |
| chr1 Cufflinks exon149291204         | 149291743 | . | + | . | gene_id "XLOC_001494"; transcript_id "TCONS_00002563"; exon_number "2"; |
| oId "CUFF.5520.2"; tss_id "TSS1892"; |           |   |   |   |                                                                         |
| chr1 Cufflinks exon151319486         | 151319664 | . | + | . | gene_id "XLOC_001551"; transcript_id "TCONS_00002674"; exon_number "1"; |
| oId "CUFF.5730.1"; tss_id "TSS1964"; |           |   |   |   |                                                                         |
| chr1 Cufflinks exon151320108         | 151320367 | . | + | . | gene_id "XLOC_001551"; transcript_id "TCONS_00002674"; exon_number "2"; |
| oId "CUFF.5730.1"; tss_id "TSS1964"; |           |   |   |   |                                                                         |
| chr1 Cufflinks exon151763059         | 151763721 | . | + | . | gene_id "XLOC_001560"; transcript_id "TCONS_00002689"; exon_number "1"; |
| oId "CUFF.5756.3"; tss_id "TSS1976"; |           |   |   |   |                                                                         |
| chr1 Cufflinks exon151763911         | 151764116 | . | + | . | gene_id "XLOC_001560"; transcript_id "TCONS_00002689"; exon_number "2"; |
| oId "CUFF.5756.3"; tss_id "TSS1976"; |           |   |   |   |                                                                         |
| chr1 Cufflinks exon151765681         | 151766024 | . | + | . | gene_id "XLOC_001560"; transcript_id "TCONS_00002689"; exon_number "3"; |
| oId "CUFF.5756.3"; tss_id "TSS1976"; |           |   |   |   |                                                                         |
| chr1 Cufflinks exon151763059         | 151763721 | . | + | . | gene_id "XLOC_001560"; transcript_id "TCONS_00002692"; exon_number "1"; |
| oId "CUFF.5756.4"; tss_id "TSS1976"; |           |   |   |   |                                                                         |
| chr1 Cufflinks exon151766291         | 151771046 | . | + | . | gene_id "XLOC_001560"; transcript_id "TCONS_00002692"; exon_number "2"; |
| oId "CUFF.5756.4"; tss_id "TSS1976"; |           |   |   |   |                                                                         |
| chr1 Cufflinks exon151763059         | 151763721 | . | + | . | gene_id "XLOC_001560"; transcript_id "TCONS_00002691"; exon_number "1"; |
| oId "CUFF.5756.2"; tss_id "TSS1976"; |           |   |   |   |                                                                         |
| chr1 Cufflinks exon151765681         | 151765798 | . | + | . | gene_id "XLOC_001560"; transcript_id "TCONS_00002691"; exon_number "2"; |
| oId "CUFF.5756.2"; tss_id "TSS1976"; |           |   |   |   |                                                                         |
| chr1 Cufflinks exon151766291         | 151771046 | . | + | . | gene_id "XLOC_001560"; transcript_id "TCONS_00002691"; exon_number "3"; |
| oId "CUFF.5756.2"; tss_id "TSS1976"; |           |   |   |   |                                                                         |
| chr1 Cufflinks exon151763059         | 151763721 | . | + | . | gene_id "XLOC_001560"; transcript_id "TCONS_00002690"; exon_number "1"; |
| oId "CUFF.5756.1"; tss_id "TSS1976"; |           |   |   |   |                                                                         |
| chr1 Cufflinks exon151763911         | 151764116 | . | + | . | gene_id "XLOC_001560"; transcript_id "TCONS_00002690"; exon_number "2"; |
| oId "CUFF.5756.1"; tss_id "TSS1976"; |           |   |   |   |                                                                         |
| chr1 Cufflinks exon151766291         | 151771046 | . | + | . | gene_id "XLOC_001560"; transcript_id "TCONS_00002690"; exon_number "3"; |
| oId "CUFF.5756.1"; tss_id "TSS1976"; |           |   |   |   |                                                                         |
| chr1 Cufflinks exon151798558         | 151798921 | . | + | . | gene_id "XLOC_001561"; transcript_id "TCONS_00002693"; exon_number "1"; |
| oId "CUFF.5759.1"; tss_id "TSS1977"; |           |   |   |   |                                                                         |
| chr1 Cufflinks exon151814217         | 151814507 | . | + | . | gene_id "XLOC_001561"; transcript_id "TCONS_00002693"; exon_number "2"; |
| oId "CUFF.5759.1"; tss_id "TSS1977"; |           |   |   |   |                                                                         |
| chr1 Cufflinks exon151816521         | 151816718 | . | + | . | gene_id "XLOC_001561"; transcript_id "TCONS_00002693"; exon_number "3"; |
| oId "CUFF.5759.1"; tss_id "TSS1977"; |           |   |   |   |                                                                         |
| chr1 Cufflinks exon151822709         | 151828833 | . | + | . | gene_id "XLOC_001561"; transcript_id "TCONS_00002693"; exon_number "4"; |
| oId "CUFF.5759.1"; tss_id "TSS1977"; |           |   |   |   |                                                                         |
| chr1 Cufflinks exon151798892         | 151798921 | . | + | . | gene_id "XLOC_001561"; transcript_id "TCONS_00002694"; exon_number "1"; |

oId "CUFF.5759.2"; tss\_id "TSS1978";  
chr1 Cufflinks exon151814217 151814507 . + . gene\_id "XLOC\_001561"; transcript\_id "TCONS\_00002694"; exon\_number "2";  
oId "CUFF.5759.2"; tss\_id "TSS1978";  
chr1 Cufflinks exon151815585 151815784 . + . gene\_id "XLOC\_001561"; transcript\_id "TCONS\_00002694"; exon\_number "3";  
oId "CUFF.5759.2"; tss\_id "TSS1978";  
chr1 Cufflinks exon151816521 151816718 . + . gene\_id "XLOC\_001561"; transcript\_id "TCONS\_00002694"; exon\_number "4";  
oId "CUFF.5759.2"; tss\_id "TSS1978";  
chr1 Cufflinks exon151822709 151828833 . + . gene\_id "XLOC\_001561"; transcript\_id "TCONS\_00002694"; exon\_number "5";  
oId "CUFF.5759.2"; tss\_id "TSS1978";  
chr1 Cufflinks exon151803590 151803636 . + . gene\_id "XLOC\_001561"; transcript\_id "TCONS\_00002695"; exon\_number "1";  
oId "CUFF.5759.3"; tss\_id "TSS1979";  
chr1 Cufflinks exon151822709 151828833 . + . gene\_id "XLOC\_001561"; transcript\_id "TCONS\_00002695"; exon\_number "2";  
oId "CUFF.5759.3"; tss\_id "TSS1979";  
chr1 Cufflinks exon151810903 151811213 . + . gene\_id "XLOC\_001561"; transcript\_id "TCONS\_00002696"; exon\_number "1";  
oId "CUFF.5759.4"; tss\_id "TSS1980";  
chr1 Cufflinks exon151811502 151811581 . + . gene\_id "XLOC\_001561"; transcript\_id "TCONS\_00002696"; exon\_number "2";  
oId "CUFF.5759.4"; tss\_id "TSS1980";  
chr1 Cufflinks exon151814217 151814507 . + . gene\_id "XLOC\_001561"; transcript\_id "TCONS\_00002696"; exon\_number "3";  
oId "CUFF.5759.4"; tss\_id "TSS1980";  
chr1 Cufflinks exon151816521 151816718 . + . gene\_id "XLOC\_001561"; transcript\_id "TCONS\_00002696"; exon\_number "4";  
oId "CUFF.5759.4"; tss\_id "TSS1980";  
chr1 Cufflinks exon151822709 151828833 . + . gene\_id "XLOC\_001561"; transcript\_id "TCONS\_00002696"; exon\_number "5";  
oId "CUFF.5759.4"; tss\_id "TSS1980";  
chr1 Cufflinks exon151810945 151811213 . + . gene\_id "XLOC\_001561"; transcript\_id "TCONS\_00002698"; exon\_number "1";  
oId "CUFF.5759.6"; tss\_id "TSS1980";  
chr1 Cufflinks exon151811502 151811581 . + . gene\_id "XLOC\_001561"; transcript\_id "TCONS\_00002698"; exon\_number "2";  
oId "CUFF.5759.6"; tss\_id "TSS1980";  
chr1 Cufflinks exon151814217 151814507 . + . gene\_id "XLOC\_001561"; transcript\_id "TCONS\_00002698"; exon\_number "3";  
oId "CUFF.5759.6"; tss\_id "TSS1980";  
chr1 Cufflinks exon151816509 151816718 . + . gene\_id "XLOC\_001561"; transcript\_id "TCONS\_00002698"; exon\_number "4";  
oId "CUFF.5759.6"; tss\_id "TSS1980";  
chr1 Cufflinks exon151822709 151828833 . + . gene\_id "XLOC\_001561"; transcript\_id "TCONS\_00002698"; exon\_number "5";  
oId "CUFF.5759.6"; tss\_id "TSS1980";  
chr1 Cufflinks exon151810945 151811213 . + . gene\_id "XLOC\_001561"; transcript\_id "TCONS\_00002697"; exon\_number "1";  
oId "CUFF.5759.5"; tss\_id "TSS1980";  
chr1 Cufflinks exon151811502 151811581 . + . gene\_id "XLOC\_001561"; transcript\_id "TCONS\_00002697"; exon\_number "2";  
oId "CUFF.5759.5"; tss\_id "TSS1980";  
chr1 Cufflinks exon151814217 151814508 . + . gene\_id "XLOC\_001561"; transcript\_id "TCONS\_00002697"; exon\_number "3";  
oId "CUFF.5759.5"; tss\_id "TSS1980";  
chr1 Cufflinks exon151816522 151816718 . + . gene\_id "XLOC\_001561"; transcript\_id "TCONS\_00002697"; exon\_number "4";  
oId "CUFF.5759.5"; tss\_id "TSS1980";  
chr1 Cufflinks exon151822709 151828833 . + . gene\_id "XLOC\_001561"; transcript\_id "TCONS\_00002697"; exon\_number "5";  
oId "CUFF.5759.5"; tss\_id "TSS1980";

|                                      |           |   |   |   |                                                                         |
|--------------------------------------|-----------|---|---|---|-------------------------------------------------------------------------|
| chr1 Cufflinks exon151813736         | 151814507 | . | + | . | gene_id "XLOC_001561"; transcript_id "TCONS_00002699"; exon_number "1"; |
| oId "CUFF.5759.7"; tss_id "TSS1981"; |           |   |   |   |                                                                         |
| chr1 Cufflinks exon151816521         | 151816719 | . | + | . | gene_id "XLOC_001561"; transcript_id "TCONS_00002699"; exon_number "2"; |
| oId "CUFF.5759.7"; tss_id "TSS1981"; |           |   |   |   |                                                                         |
| chr1 Cufflinks exon151822709         | 151828833 | . | + | . | gene_id "XLOC_001561"; transcript_id "TCONS_00002699"; exon_number "3"; |
| oId "CUFF.5759.7"; tss_id "TSS1981"; |           |   |   |   |                                                                         |
| chr1 Cufflinks exon151813977         | 151814159 | . | + | . | gene_id "XLOC_001561"; transcript_id "TCONS_00002700"; exon_number "1"; |
| oId "CUFF.5759.8"; tss_id "TSS1982"; |           |   |   |   |                                                                         |
| chr1 Cufflinks exon151816521         | 151816718 | . | + | . | gene_id "XLOC_001561"; transcript_id "TCONS_00002700"; exon_number "2"; |
| oId "CUFF.5759.8"; tss_id "TSS1982"; |           |   |   |   |                                                                         |
| chr1 Cufflinks exon151822709         | 151828833 | . | + | . | gene_id "XLOC_001561"; transcript_id "TCONS_00002700"; exon_number "3"; |
| oId "CUFF.5759.8"; tss_id "TSS1982"; |           |   |   |   |                                                                         |
| chr1 Cufflinks exon151815013         | 151815784 | . | + | . | gene_id "XLOC_001561"; transcript_id "TCONS_00002702"; exon_number "1"; |
| oId "CUFF.5759.9"; tss_id "TSS1983"; |           |   |   |   |                                                                         |
| chr1 Cufflinks exon151816521         | 151816718 | . | + | . | gene_id "XLOC_001561"; transcript_id "TCONS_00002702"; exon_number "2"; |
| oId "CUFF.5759.9"; tss_id "TSS1983"; |           |   |   |   |                                                                         |
| chr1 Cufflinks exon151822709         | 151828833 | . | + | . | gene_id "XLOC_001561"; transcript_id "TCONS_00002702"; exon_number "3"; |
| oId "CUFF.5759.9"; tss_id "TSS1983"; |           |   |   |   |                                                                         |
| chr1 Cufflinks exon153895811         | 153896438 | . | + | . | gene_id "XLOC_001593"; transcript_id "TCONS_00002745"; exon_number "1"; |
| oId "CUFF.5844.1"; tss_id "TSS2020"; |           |   |   |   |                                                                         |
| chr1 Cufflinks exon153898717         | 153898771 | . | + | . | gene_id "XLOC_001593"; transcript_id "TCONS_00002745"; exon_number "2"; |
| oId "CUFF.5844.1"; tss_id "TSS2020"; |           |   |   |   |                                                                         |
| chr1 Cufflinks exon159824722         | 159825436 | . | + | . | gene_id "XLOC_001708"; transcript_id "TCONS_00002983"; exon_number "1"; |
| oId "CUFF.6313.1"; tss_id "TSS2176"; |           |   |   |   |                                                                         |
| chr1 Cufflinks exon159825700         | 159825914 | . | + | . | gene_id "XLOC_001708"; transcript_id "TCONS_00002983"; exon_number "2"; |
| oId "CUFF.6313.1"; tss_id "TSS2176"; |           |   |   |   |                                                                         |
| chr1 Cufflinks exon159830436         | 159837614 | . | + | . | gene_id "XLOC_001708"; transcript_id "TCONS_00002983"; exon_number "3"; |
| oId "CUFF.6313.1"; tss_id "TSS2176"; |           |   |   |   |                                                                         |
| chr1 Cufflinks exon159824753         | 159825128 | . | + | . | gene_id "XLOC_001708"; transcript_id "TCONS_00002984"; exon_number "1"; |
| oId "CUFF.6313.2"; tss_id "TSS2176"; |           |   |   |   |                                                                         |
| chr1 Cufflinks exon159825700         | 159825914 | . | + | . | gene_id "XLOC_001708"; transcript_id "TCONS_00002984"; exon_number "2"; |
| oId "CUFF.6313.2"; tss_id "TSS2176"; |           |   |   |   |                                                                         |
| chr1 Cufflinks exon159830436         | 159830634 | . | + | . | gene_id "XLOC_001708"; transcript_id "TCONS_00002984"; exon_number "3"; |
| oId "CUFF.6313.2"; tss_id "TSS2176"; |           |   |   |   |                                                                         |
| chr1 Cufflinks exon159830869         | 159837614 | . | + | . | gene_id "XLOC_001708"; transcript_id "TCONS_00002984"; exon_number "4"; |
| oId "CUFF.6313.2"; tss_id "TSS2176"; |           |   |   |   |                                                                         |
| chr1 Cufflinks exon159824766         | 159824840 | . | + | . | gene_id "XLOC_001708"; transcript_id "TCONS_00002985"; exon_number "1"; |
| oId "CUFF.6313.3"; tss_id "TSS2176"; |           |   |   |   |                                                                         |
| chr1 Cufflinks exon159825700         | 159825914 | . | + | . | gene_id "XLOC_001708"; transcript_id "TCONS_00002985"; exon_number "2"; |
| oId "CUFF.6313.3"; tss_id "TSS2176"; |           |   |   |   |                                                                         |
| chr1 Cufflinks exon159830436         | 159837614 | . | + | . | gene_id "XLOC_001708"; transcript_id "TCONS_00002985"; exon_number "3"; |
| oId "CUFF.6313.3"; tss_id "TSS2176"; |           |   |   |   |                                                                         |
| chr1 Cufflinks exon161359976         | 161360022 | . | + | . | gene_id "XLOC_001757"; transcript_id "TCONS_00003051"; exon_number "1"; |

oId "CUFF.6471.2"; tss\_id "TSS2227";  
chr1 Cufflinks exon 161367532 161367653 . + . gene\_id "XLOC\_001757"; transcript\_id "TCONS\_00003051"; exon\_number "2";  
oId "CUFF.6471.2"; tss\_id "TSS2227";  
chr1 Cufflinks exon 161368745 161371752 . + . gene\_id "XLOC\_001757"; transcript\_id "TCONS\_00003051";  
exon\_number "3"; oId "CUFF.6471.2"; tss\_id "TSS2227";  
chr1 Cufflinks exon 168323512 168323864 . + . gene\_id "XLOC\_001826"; transcript\_id "TCONS\_00003190";  
exon\_number "1"; oId "CUFF.6727.1"; tss\_id "TSS2319";  
chr1 Cufflinks exon 168513125 168513276 . + . gene\_id "XLOC\_001826"; transcript\_id "TCONS\_00003190";  
exon\_number "2"; oId "CUFF.6727.1"; tss\_id "TSS2319";  
chr1 Cufflinks exon 168528844 168528970 . + . gene\_id "XLOC\_001826"; transcript\_id "TCONS\_00003190";  
exon\_number "3"; oId "CUFF.6727.1"; tss\_id "TSS2319";  
chr1 Cufflinks exon 168534620 168537110 . + . gene\_id "XLOC\_001826"; transcript\_id "TCONS\_00003190";  
exon\_number "4"; oId "CUFF.6727.1"; tss\_id "TSS2319";  
chr1 Cufflinks exon 168323672 168323779 . + . gene\_id "XLOC\_001826"; transcript\_id "TCONS\_00003191";  
exon\_number "1"; oId "CUFF.6727.2"; tss\_id "TSS2320";  
chr1 Cufflinks exon 168348847 168349020 . + . gene\_id "XLOC\_001826"; transcript\_id "TCONS\_00003191";  
exon\_number "2"; oId "CUFF.6727.2"; tss\_id "TSS2320";  
chr1 Cufflinks exon 168473454 168474193 . + . gene\_id "XLOC\_001826"; transcript\_id "TCONS\_00003191";  
exon\_number "3"; oId "CUFF.6727.2"; tss\_id "TSS2320";  
chr1 Cufflinks exon 168348852 168349020 . + . gene\_id "XLOC\_001826"; transcript\_id "TCONS\_00003192";  
exon\_number "1"; oId "CUFF.6727.3"; tss\_id "TSS2321";  
chr1 Cufflinks exon 168528844 168528976 . + . gene\_id "XLOC\_001826"; transcript\_id "TCONS\_00003192";  
exon\_number "2"; oId "CUFF.6727.3"; tss\_id "TSS2321";  
chr1 Cufflinks exon 168532748 168537110 . + . gene\_id "XLOC\_001826"; transcript\_id "TCONS\_00003192";  
exon\_number "3"; oId "CUFF.6727.3"; tss\_id "TSS2321";  
chr1 Cufflinks exon 170624553 170624599 . + . gene\_id "XLOC\_001848"; transcript\_id "TCONS\_00003223";  
exon\_number "1"; oId "CUFF.6803.1"; tss\_id "TSS2344";  
chr1 Cufflinks exon 170625927 170625988 . + . gene\_id "XLOC\_001848"; transcript\_id "TCONS\_00003223";  
exon\_number "2"; oId "CUFF.6803.1"; tss\_id "TSS2344";  
chr1 Cufflinks exon 170629340 170629935 . + . gene\_id "XLOC\_001848"; transcript\_id "TCONS\_00003223";  
exon\_number "3"; oId "CUFF.6803.1"; tss\_id "TSS2344";  
chr1 Cufflinks exon 178511416 178512020 . + . gene\_id "XLOC\_001894"; transcript\_id "TCONS\_00003311";  
exon\_number "1"; oId "CUFF.6980.5"; tss\_id "TSS2394";  
chr1 Cufflinks exon 178516229 178521288 . + . gene\_id "XLOC\_001894"; transcript\_id "TCONS\_00003311";  
exon\_number "2"; oId "CUFF.6980.5"; tss\_id "TSS2394";  
chr1 Cufflinks exon 178511416 178512020 . + . gene\_id "XLOC\_001894"; transcript\_id "TCONS\_00003309";  
exon\_number "1"; oId "CUFF.6980.2"; tss\_id "TSS2394";  
chr1 Cufflinks exon 178516229 178516298 . + . gene\_id "XLOC\_001894"; transcript\_id "TCONS\_00003309";  
exon\_number "2"; oId "CUFF.6980.2"; tss\_id "TSS2394";  
chr1 Cufflinks exon 178517411 178521288 . + . gene\_id "XLOC\_001894"; transcript\_id "TCONS\_00003309";  
exon\_number "3"; oId "CUFF.6980.2"; tss\_id "TSS2394";  
chr1 Cufflinks exon 178511416 178512020 . + . gene\_id "XLOC\_001894"; transcript\_id "TCONS\_00003308";  
exon\_number "1"; oId "CUFF.6980.1"; tss\_id "TSS2394";

chr1 Cufflinks exon 178514010 178515038 . + . gene\_id "XLOC\_001894"; transcript\_id "TCONS\_00003308";  
 exon\_number "2"; oId "CUFF.6980.1"; tss\_id "TSS2394";

chr1 Cufflinks exon 178516229 178521288 . + . gene\_id "XLOC\_001894"; transcript\_id "TCONS\_00003308"; exon\_number  
 "3"; oId "CUFF.6980.1"; tss\_id "TSS2394";

chr1 Cufflinks exon 178511416 178516298 . + . gene\_id "XLOC\_001894"; transcript\_id "TCONS\_00003312"; exon\_number "1";  
 oId "CUFF.6980.3"; tss\_id "TSS2394";

chr1 Cufflinks exon 178631318 178632090 . + . gene\_id "XLOC\_001894"; transcript\_id "TCONS\_00003312"; exon\_number "2";  
 oId "CUFF.6980.3"; tss\_id "TSS2394";

chr1 Cufflinks exon 178511426 178512020 . + . gene\_id "XLOC\_001894"; transcript\_id "TCONS\_00003313"; exon\_number "1";  
 oId "CUFF.6980.6"; tss\_id "TSS2394";

chr1 Cufflinks exon 178514348 178521288 . + . gene\_id "XLOC\_001894"; transcript\_id "TCONS\_00003313"; exon\_number "2";  
 oId "CUFF.6980.6"; tss\_id "TSS2394";

chr1 Cufflinks exon 178511427 178512020 . + . gene\_id "XLOC\_001894"; transcript\_id "TCONS\_00003314"; exon\_number "1";  
 oId "CUFF.6980.7"; tss\_id "TSS2394";

chr1 Cufflinks exon 178514348 178515038 . + . gene\_id "XLOC\_001894"; transcript\_id "TCONS\_00003314"; exon\_number "2";  
 oId "CUFF.6980.7"; tss\_id "TSS2394";

chr1 Cufflinks exon 178516229 178521288 . + . gene\_id "XLOC\_001894"; transcript\_id "TCONS\_00003314"; exon\_number "3";  
 oId "CUFF.6980.7"; tss\_id "TSS2394";

chr1 Cufflinks exon 178512968 178515038 . + . gene\_id "XLOC\_001894"; transcript\_id "TCONS\_00003315"; exon\_number "1";  
 oId "CUFF.6980.8"; tss\_id "TSS2395";

chr1 Cufflinks exon 178516229 178521288 . + . gene\_id "XLOC\_001894"; transcript\_id "TCONS\_00003315"; exon\_number "2";  
 oId "CUFF.6980.8"; tss\_id "TSS2395";

chr1 Cufflinks exon 180528043 180528191 . + . gene\_id "XLOC\_001914"; transcript\_id "TCONS\_00003347"; exon\_number "1";  
 oId "CUFF.7042.1"; tss\_id "TSS2420";

chr1 Cufflinks exon 180531340 180531485 . + . gene\_id "XLOC\_001914"; transcript\_id "TCONS\_00003347"; exon\_number "2";  
 oId "CUFF.7042.1"; tss\_id "TSS2420";

chr1 Cufflinks exon 180534387 180535654 . + . gene\_id "XLOC\_001914"; transcript\_id "TCONS\_00003347"; exon\_number "3";  
 oId "CUFF.7042.1"; tss\_id "TSS2420";

chr1 Cufflinks exon 180528110 180528191 . + . gene\_id "XLOC\_001914"; transcript\_id "TCONS\_00003348"; exon\_number "1";  
 oId "CUFF.7042.2"; tss\_id "TSS2420";

chr1 Cufflinks exon 180531340 180531480 . + . gene\_id "XLOC\_001914"; transcript\_id "TCONS\_00003348"; exon\_number "2";  
 oId "CUFF.7042.2"; tss\_id "TSS2420";

chr1 Cufflinks exon 180534387 180535654 . + . gene\_id "XLOC\_001914"; transcript\_id "TCONS\_00003348"; exon\_number "3";  
 oId "CUFF.7042.2"; tss\_id "TSS2420";

chr1 Cufflinks exon 187041625 187042156 . + . gene\_id "XLOC\_001973"; transcript\_id "TCONS\_00003447"; exon\_number "1";  
 oId "CUFF.7186.1"; tss\_id "TSS2491";

chr1 Cufflinks exon 187061957 187062078 . + . gene\_id "XLOC\_001973"; transcript\_id "TCONS\_00003447"; exon\_number "2";  
 oId "CUFF.7186.1"; tss\_id "TSS2491";

chr1 Cufflinks exon 187296053 187296155 . + . gene\_id "XLOC\_001973"; transcript\_id "TCONS\_00003447"; exon\_number "3";  
 oId "CUFF.7186.1"; tss\_id "TSS2491";

chr1 Cufflinks exon 187298123 187298192 . + . gene\_id "XLOC\_001973"; transcript\_id "TCONS\_00003447"; exon\_number "4";  
 oId "CUFF.7186.1"; tss\_id "TSS2491";

chr1 Cufflinks exon 187387043 187387135 . + . gene\_id "XLOC\_001973"; transcript\_id "TCONS\_00003447"; exon\_number "5";

oId "CUFF.7186.1"; tss\_id "TSS2491";  
chr1 Cufflinks exon187412760 187412858 . + . gene\_id "XLOC\_001973"; transcript\_id "TCONS\_00003447"; exon\_number "6";  
oId "CUFF.7186.1"; tss\_id "TSS2491";  
chr1 Cufflinks exon187449387 187450158 . + . gene\_id "XLOC\_001973"; transcript\_id "TCONS\_00003447"; exon\_number "7";  
oId "CUFF.7186.1"; tss\_id "TSS2491";  
chr1 Cufflinks exon187041635 187042156 . + . gene\_id "XLOC\_001973"; transcript\_id "TCONS\_00003448"; exon\_number "1";  
oId "CUFF.7186.2"; tss\_id "TSS2491";  
chr1 Cufflinks exon187298123 187298192 . + . gene\_id "XLOC\_001973"; transcript\_id "TCONS\_00003448"; exon\_number "2";  
oId "CUFF.7186.2"; tss\_id "TSS2491";  
chr1 Cufflinks exon187412760 187412858 . + . gene\_id "XLOC\_001973"; transcript\_id "TCONS\_00003448"; exon\_number "3";  
oId "CUFF.7186.2"; tss\_id "TSS2491";  
chr1 Cufflinks exon187453555 187456333 . + . gene\_id "XLOC\_001973"; transcript\_id "TCONS\_00003448"; exon\_number "4";  
oId "CUFF.7186.2"; tss\_id "TSS2491";  
chr1 Cufflinks exon187041642 187042156 . + . gene\_id "XLOC\_001973"; transcript\_id "TCONS\_00003450"; exon\_number "1";  
oId "CUFF.7186.4"; tss\_id "TSS2491";  
chr1 Cufflinks exon187061957 187062078 . + . gene\_id "XLOC\_001973"; transcript\_id "TCONS\_00003450"; exon\_number "2";  
oId "CUFF.7186.4"; tss\_id "TSS2491";  
chr1 Cufflinks exon187272598 187272671 . + . gene\_id "XLOC\_001973"; transcript\_id "TCONS\_00003450"; exon\_number "3";  
oId "CUFF.7186.4"; tss\_id "TSS2491";  
chr1 Cufflinks exon187298123 187298192 . + . gene\_id "XLOC\_001973"; transcript\_id "TCONS\_00003450"; exon\_number "4";  
oId "CUFF.7186.4"; tss\_id "TSS2491";  
chr1 Cufflinks exon187387043 187387135 . + . gene\_id "XLOC\_001973"; transcript\_id "TCONS\_00003450"; exon\_number "5";  
oId "CUFF.7186.4"; tss\_id "TSS2491";  
chr1 Cufflinks exon187412760 187412858 . + . gene\_id "XLOC\_001973"; transcript\_id "TCONS\_00003450"; exon\_number "6";  
oId "CUFF.7186.4"; tss\_id "TSS2491";  
chr1 Cufflinks exon187439203 187439324 . + . gene\_id "XLOC\_001973"; transcript\_id "TCONS\_00003450"; exon\_number "7";  
oId "CUFF.7186.4"; tss\_id "TSS2491";  
chr1 Cufflinks exon187439927 187445960 . + . gene\_id "XLOC\_001973"; transcript\_id "TCONS\_00003450"; exon\_number "8";  
oId "CUFF.7186.4"; tss\_id "TSS2491";  
chr1 Cufflinks exon187446152 187450158 . + . gene\_id "XLOC\_001973"; transcript\_id "TCONS\_00003450"; exon\_number "9";  
oId "CUFF.7186.4"; tss\_id "TSS2491";  
chr1 Cufflinks exon187041642 187042156 . + . gene\_id "XLOC\_001973"; transcript\_id "TCONS\_00003449"; exon\_number "1";  
oId "CUFF.7186.3"; tss\_id "TSS2491";  
chr1 Cufflinks exon187061957 187062078 . + . gene\_id "XLOC\_001973"; transcript\_id "TCONS\_00003449"; exon\_number "2";  
oId "CUFF.7186.3"; tss\_id "TSS2491";  
chr1 Cufflinks exon187272598 187272671 . + . gene\_id "XLOC\_001973"; transcript\_id "TCONS\_00003449"; exon\_number "3";  
oId "CUFF.7186.3"; tss\_id "TSS2491";  
chr1 Cufflinks exon187298123 187298192 . + . gene\_id "XLOC\_001973"; transcript\_id "TCONS\_00003449"; exon\_number "4";  
oId "CUFF.7186.3"; tss\_id "TSS2491";  
chr1 Cufflinks exon187387043 187387135 . + . gene\_id "XLOC\_001973"; transcript\_id "TCONS\_00003449"; exon\_number "5";  
oId "CUFF.7186.3"; tss\_id "TSS2491";  
chr1 Cufflinks exon187412760 187412858 . + . gene\_id "XLOC\_001973"; transcript\_id "TCONS\_00003449"; exon\_number "6";  
oId "CUFF.7186.3"; tss\_id "TSS2491";

|                                      |           |   |   |   |                                                                         |
|--------------------------------------|-----------|---|---|---|-------------------------------------------------------------------------|
| chr1 Cufflinks exon187439203         | 187450158 | . | + | . | gene_id "XLOC_001973"; transcript_id "TCONS_00003449"; exon_number "7"; |
| oId "CUFF.7186.3"; tss_id "TSS2491"; |           |   |   |   |                                                                         |
| chr1 Cufflinks exon187238529         | 187238640 | . | + | . | gene_id "XLOC_001973"; transcript_id "TCONS_00003507"; exon_number "1"; |
| oId "CUFF.7186.7"; tss_id "TSS2492"; |           |   |   |   |                                                                         |
| chr1 Cufflinks exon187296053         | 187296155 | . | + | . | gene_id "XLOC_001973"; transcript_id "TCONS_00003507"; exon_number "2"; |
| oId "CUFF.7186.7"; tss_id "TSS2492"; |           |   |   |   |                                                                         |
| chr1 Cufflinks exon187298123         | 187298197 | . | + | . | gene_id "XLOC_001973"; transcript_id "TCONS_00003507"; exon_number "3"; |
| oId "CUFF.7186.7"; tss_id "TSS2492"; |           |   |   |   |                                                                         |
| chr1 Cufflinks exon187412765         | 187412862 | . | + | . | gene_id "XLOC_001973"; transcript_id "TCONS_00003507"; exon_number "4"; |
| oId "CUFF.7186.7"; tss_id "TSS2492"; |           |   |   |   |                                                                         |
| chr1 Cufflinks exon187453559         | 187456333 | . | + | . | gene_id "XLOC_001973"; transcript_id "TCONS_00003507"; exon_number "5"; |
| oId "CUFF.7186.7"; tss_id "TSS2492"; |           |   |   |   |                                                                         |
| chr1 Cufflinks exon191150901         | 191150911 | . | + | . | gene_id "XLOC_002074"; transcript_id "TCONS_00003552"; exon_number "1"; |
| oId "CUFF.7401.1"; tss_id "TSS2593"; |           |   |   |   |                                                                         |
| chr1 Cufflinks exon191151000         | 191151196 | . | + | . | gene_id "XLOC_002074"; transcript_id "TCONS_00003552"; exon_number "2"; |
| oId "CUFF.7401.1"; tss_id "TSS2593"; |           |   |   |   |                                                                         |
| chr1 Cufflinks exon191164053         | 191164308 | . | + | . | gene_id "XLOC_002074"; transcript_id "TCONS_00003552"; exon_number "3"; |
| oId "CUFF.7401.1"; tss_id "TSS2593"; |           |   |   |   |                                                                         |
| chr1 Cufflinks exon191150901         | 191150911 | . | + | . | gene_id "XLOC_002074"; transcript_id "TCONS_00003553"; exon_number "1"; |
| oId "CUFF.7401.2"; tss_id "TSS2593"; |           |   |   |   |                                                                         |
| chr1 Cufflinks exon191151000         | 191151196 | . | + | . | gene_id "XLOC_002074"; transcript_id "TCONS_00003553"; exon_number "2"; |
| oId "CUFF.7401.2"; tss_id "TSS2593"; |           |   |   |   |                                                                         |
| chr1 Cufflinks exon191177233         | 191177348 | . | + | . | gene_id "XLOC_002074"; transcript_id "TCONS_00003553"; exon_number "3"; |
| oId "CUFF.7401.2"; tss_id "TSS2593"; |           |   |   |   |                                                                         |
| chr1 Cufflinks exon191229079         | 191229154 | . | + | . | gene_id "XLOC_002074"; transcript_id "TCONS_00003553"; exon_number "4"; |
| oId "CUFF.7401.2"; tss_id "TSS2593"; |           |   |   |   |                                                                         |
| chr1 Cufflinks exon191233976         | 191234055 | . | + | . | gene_id "XLOC_002074"; transcript_id "TCONS_00003553"; exon_number "5"; |
| oId "CUFF.7401.2"; tss_id "TSS2593"; |           |   |   |   |                                                                         |
| chr1 Cufflinks exon192578464         | 192579066 | . | + | . | gene_id "XLOC_002082"; transcript_id "TCONS_00003563"; exon_number "1"; |
| oId "CUFF.7425.2"; tss_id "TSS2601"; |           |   |   |   |                                                                         |
| chr1 Cufflinks exon192603139         | 192604056 | . | + | . | gene_id "XLOC_002082"; transcript_id "TCONS_00003563"; exon_number "2"; |
| oId "CUFF.7425.2"; tss_id "TSS2601"; |           |   |   |   |                                                                         |
| chr1 Cufflinks exon198057715         | 198058027 | . | + | . | gene_id "XLOC_002103"; transcript_id "TCONS_00003608"; exon_number "1"; |
| oId "CUFF.7508.1"; tss_id "TSS2631"; |           |   |   |   |                                                                         |
| chr1 Cufflinks exon198101710         | 198101728 | . | + | . | gene_id "XLOC_002103"; transcript_id "TCONS_00003608"; exon_number "2"; |
| oId "CUFF.7508.1"; tss_id "TSS2631"; |           |   |   |   |                                                                         |
| chr1 Cufflinks exon198057715         | 198058027 | . | + | . | gene_id "XLOC_002103"; transcript_id "TCONS_00003609"; exon_number "1"; |
| oId "CUFF.7508.2"; tss_id "TSS2631"; |           |   |   |   |                                                                         |
| chr1 Cufflinks exon198120758         | 198120861 | . | + | . | gene_id "XLOC_002103"; transcript_id "TCONS_00003609"; exon_number "2"; |
| oId "CUFF.7508.2"; tss_id "TSS2631"; |           |   |   |   |                                                                         |
| chr1 Cufflinks exon199131052         | 199131084 | . | + | . | gene_id "XLOC_002117"; transcript_id "TCONS_00003627"; exon_number "1"; |
| oId "CUFF.7626.1"; tss_id "TSS2646"; |           |   |   |   |                                                                         |
| chr1 Cufflinks exon199131593         | 199134166 | . | + | . | gene_id "XLOC_002117"; transcript_id "TCONS_00003627"; exon_number "2"; |

oId "CUFF.7626.1"; tss\_id "TSS2646";  
chr1 Cufflinks exon199134971 199135090 . + . gene\_id "XLOC\_002117"; transcript\_id "TCONS\_00003627"; exon\_number "3";  
oId "CUFF.7626.1"; tss\_id "TSS2646";  
chr1 Cufflinks exon199150390 199151978 . + . gene\_id "XLOC\_002117"; transcript\_id "TCONS\_00003627"; exon\_number "4";  
oId "CUFF.7626.1"; tss\_id "TSS2646";  
chr1 Cufflinks exon199131114 199131279 . + . gene\_id "XLOC\_002117"; transcript\_id "TCONS\_00003628"; exon\_number "1";  
oId "CUFF.7626.2"; tss\_id "TSS2646";  
chr1 Cufflinks exon199131593 199135090 . + . gene\_id "XLOC\_002117"; transcript\_id "TCONS\_00003628"; exon\_number "2";  
oId "CUFF.7626.2"; tss\_id "TSS2646";  
chr1 Cufflinks exon199150390 199151978 . + . gene\_id "XLOC\_002117"; transcript\_id "TCONS\_00003628"; exon\_number "3";  
oId "CUFF.7626.2"; tss\_id "TSS2646";  
chr1 Cufflinks exon199131116 199131279 . + . gene\_id "XLOC\_002117"; transcript\_id "TCONS\_00003629"; exon\_number "1";  
oId "CUFF.7626.3"; tss\_id "TSS2646";  
chr1 Cufflinks exon199131593 199131698 . + . gene\_id "XLOC\_002117"; transcript\_id "TCONS\_00003629"; exon\_number "2";  
oId "CUFF.7626.3"; tss\_id "TSS2646";  
chr1 Cufflinks exon199133124 199133213 . + . gene\_id "XLOC\_002117"; transcript\_id "TCONS\_00003629"; exon\_number "3";  
oId "CUFF.7626.3"; tss\_id "TSS2646";  
chr1 Cufflinks exon199134000 199134166 . + . gene\_id "XLOC\_002117"; transcript\_id "TCONS\_00003629"; exon\_number "4";  
oId "CUFF.7626.3"; tss\_id "TSS2646";  
chr1 Cufflinks exon199134971 199135090 . + . gene\_id "XLOC\_002117"; transcript\_id "TCONS\_00003629"; exon\_number "5";  
oId "CUFF.7626.3"; tss\_id "TSS2646";  
chr1 Cufflinks exon199150390 199151978 . + . gene\_id "XLOC\_002117"; transcript\_id "TCONS\_00003629"; exon\_number "6";  
oId "CUFF.7626.3"; tss\_id "TSS2646";  
chr1 Cufflinks exon202780019 202780498 . + . gene\_id "XLOC\_002156"; transcript\_id "TCONS\_00003710"; exon\_number "1";  
oId "CUFF.7763.4"; tss\_id "TSS2701";  
chr1 Cufflinks exon202781151 202781428 . + . gene\_id "XLOC\_002156"; transcript\_id "TCONS\_00003710"; exon\_number "2";  
oId "CUFF.7763.4"; tss\_id "TSS2701";  
chr1 Cufflinks exon202780019 202780498 . + . gene\_id "XLOC\_002156"; transcript\_id "TCONS\_00003709"; exon\_number "1";  
oId "CUFF.7763.3"; tss\_id "TSS2701";  
chr1 Cufflinks exon202780703 202781428 . + . gene\_id "XLOC\_002156"; transcript\_id "TCONS\_00003709"; exon\_number "2";  
oId "CUFF.7763.3"; tss\_id "TSS2701";  
chr1 Cufflinks exon202780019 202780498 . + . gene\_id "XLOC\_002156"; transcript\_id "TCONS\_00003708"; exon\_number "1";  
oId "CUFF.7763.2"; tss\_id "TSS2701";  
chr1 Cufflinks exon202780817 202781428 . + . gene\_id "XLOC\_002156"; transcript\_id "TCONS\_00003708"; exon\_number "2";  
oId "CUFF.7763.2"; tss\_id "TSS2701";  
chr1 Cufflinks exon203256280 203256439 . + . gene\_id "XLOC\_002167"; transcript\_id "TCONS\_00003734"; exon\_number "1";  
oId "CUFF.7798.1"; tss\_id "TSS2715";  
chr1 Cufflinks exon203257117 203257434 . + . gene\_id "XLOC\_002167"; transcript\_id "TCONS\_00003734"; exon\_number "2";  
oId "CUFF.7798.1"; tss\_id "TSS2715";  
chr1 Cufflinks exon203257633 203257924 . + . gene\_id "XLOC\_002167"; transcript\_id "TCONS\_00003734"; exon\_number "3";  
oId "CUFF.7798.1"; tss\_id "TSS2715";  
chr1 Cufflinks exon203256658 203256959 . + . gene\_id "XLOC\_002167"; transcript\_id "TCONS\_00003735"; exon\_number "1";  
oId "CUFF.7798.2"; tss\_id "TSS2716";



|                                      |           |           |   |   |   |                                                                         |
|--------------------------------------|-----------|-----------|---|---|---|-------------------------------------------------------------------------|
| chr1 Cufflinks exon                  | 203257117 | 203257378 | . | + | . | gene_id "XLOC_002167"; transcript_id "TCONS_00003735"; exon_number "2"; |
| oId "CUFF.7798.2"; tss_id "TSS2716"; |           |           |   |   |   |                                                                         |
| chr1 Cufflinks exon                  | 203257633 | 203257811 | . | + | . | gene_id "XLOC_002167"; transcript_id "TCONS_00003735"; exon_number "3"; |
| oId "CUFF.7798.2"; tss_id "TSS2716"; |           |           |   |   |   |                                                                         |
| chr1 Cufflinks exon                  | 203257928 | 203258083 | . | + | . | gene_id "XLOC_002167"; transcript_id "TCONS_00003735"; exon_number "4"; |
| oId "CUFF.7798.2"; tss_id "TSS2716"; |           |           |   |   |   |                                                                         |
| chr1 Cufflinks exon                  | 203256731 | 203256768 | . | + | . | gene_id "XLOC_002167"; transcript_id "TCONS_00003736"; exon_number "1"; |
| oId "CUFF.7798.3"; tss_id "TSS2716"; |           |           |   |   |   |                                                                         |
| chr1 Cufflinks exon                  | 203257117 | 203257434 | . | + | . | gene_id "XLOC_002167"; transcript_id "TCONS_00003736"; exon_number "2"; |
| oId "CUFF.7798.3"; tss_id "TSS2716"; |           |           |   |   |   |                                                                         |
| chr1 Cufflinks exon                  | 203257633 | 203257924 | . | + | . | gene_id "XLOC_002167"; transcript_id "TCONS_00003736"; exon_number "3"; |
| oId "CUFF.7798.3"; tss_id "TSS2716"; |           |           |   |   |   |                                                                         |
| chr1 Cufflinks exon                  | 203256818 | 203257434 | . | + | . | gene_id "XLOC_002167"; transcript_id "TCONS_00003737"; exon_number "1"; |
| oId "CUFF.7798.4"; tss_id "TSS2717"; |           |           |   |   |   |                                                                         |
| chr1 Cufflinks exon                  | 203257633 | 203257924 | . | + | . | gene_id "XLOC_002167"; transcript_id "TCONS_00003737"; exon_number "2"; |
| oId "CUFF.7798.4"; tss_id "TSS2717"; |           |           |   |   |   |                                                                         |
| chr1 Cufflinks exon                  | 203256828 | 203257226 | . | + | . | gene_id "XLOC_002167"; transcript_id "TCONS_00003738"; exon_number "1"; |
| oId "CUFF.7798.5"; tss_id "TSS2717"; |           |           |   |   |   |                                                                         |
| chr1 Cufflinks exon                  | 203257633 | 203257924 | . | + | . | gene_id "XLOC_002167"; transcript_id "TCONS_00003738"; exon_number "2"; |
| oId "CUFF.7798.5"; tss_id "TSS2717"; |           |           |   |   |   |                                                                         |
| chr1 Cufflinks exon                  | 205410389 | 205410431 | . | + | . | gene_id "XLOC_002198"; transcript_id "TCONS_00003798"; exon_number "1"; |
| oId "CUFF.7892.2"; tss_id "TSS2763"; |           |           |   |   |   |                                                                         |
| chr1 Cufflinks exon                  | 205411169 | 205411342 | . | + | . | gene_id "XLOC_002198"; transcript_id "TCONS_00003798"; exon_number "2"; |
| oId "CUFF.7892.2"; tss_id "TSS2763"; |           |           |   |   |   |                                                                         |
| chr1 Cufflinks exon                  | 205415338 | 205415446 | . | + | . | gene_id "XLOC_002198"; transcript_id "TCONS_00003798"; exon_number "3"; |
| oId "CUFF.7892.2"; tss_id "TSS2763"; |           |           |   |   |   |                                                                         |
| chr1 Cufflinks exon                  | 205426020 | 205428671 | . | + | . | gene_id "XLOC_002198"; transcript_id "TCONS_00003798"; exon_number "4"; |
| oId "CUFF.7892.2"; tss_id "TSS2763"; |           |           |   |   |   |                                                                         |
| chr1 Cufflinks exon                  | 205410389 | 205410431 | . | + | . | gene_id "XLOC_002198"; transcript_id "TCONS_00003797"; exon_number "1"; |
| oId "CUFF.7892.1"; tss_id "TSS2763"; |           |           |   |   |   |                                                                         |
| chr1 Cufflinks exon                  | 205411169 | 205411342 | . | + | . | gene_id "XLOC_002198"; transcript_id "TCONS_00003797"; exon_number "2"; |
| oId "CUFF.7892.1"; tss_id "TSS2763"; |           |           |   |   |   |                                                                         |
| chr1 Cufflinks exon                  | 205426020 | 205428671 | . | + | . | gene_id "XLOC_002198"; transcript_id "TCONS_00003797"; exon_number "3"; |
| oId "CUFF.7892.1"; tss_id "TSS2763"; |           |           |   |   |   |                                                                         |
| chr1 Cufflinks exon                  | 205410401 | 205411342 | . | + | . | gene_id "XLOC_002198"; transcript_id "TCONS_00003799"; exon_number "1"; |
| oId "CUFF.7892.3"; tss_id "TSS2763"; |           |           |   |   |   |                                                                         |
| chr1 Cufflinks exon                  | 205415338 | 205415792 | . | + | . | gene_id "XLOC_002198"; transcript_id "TCONS_00003799"; exon_number "2"; |
| oId "CUFF.7892.3"; tss_id "TSS2763"; |           |           |   |   |   |                                                                         |
| chr1 Cufflinks exon                  | 205434896 | 205434919 | . | + | . | gene_id "XLOC_002199"; transcript_id "TCONS_00003800"; exon_number "1"; |
| oId "CUFF.7893.1"; tss_id "TSS2764"; |           |           |   |   |   |                                                                         |
| chr1 Cufflinks exon                  | 205435749 | 205439568 | . | + | . | gene_id "XLOC_002199"; transcript_id "TCONS_00003800"; exon_number "2"; |
| oId "CUFF.7893.1"; tss_id "TSS2764"; |           |           |   |   |   |                                                                         |
| chr1 Cufflinks exon                  | 210849769 | 210850054 | . | + | . | gene_id "XLOC_002281"; transcript_id "TCONS_00003932"; exon_number "1"; |

oId "CUFF.8155.1"; tss\_id "TSS2860";  
chr1 Cufflinks exon210852462 210852519 . + . gene\_id "XLOC\_002281"; transcript\_id "TCONS\_00003932"; exon\_number "2";  
oId "CUFF.8155.1"; tss\_id "TSS2860";  
chr1 Cufflinks exon210853839 210853994 . + . gene\_id "XLOC\_002281"; transcript\_id "TCONS\_00003932"; exon\_number "3";  
oId "CUFF.8155.1"; tss\_id "TSS2860";  
chr1 Cufflinks exon210859059 210859072 . + . gene\_id "XLOC\_002281"; transcript\_id "TCONS\_00003932"; exon\_number "4";  
oId "CUFF.8155.1"; tss\_id "TSS2860";  
chr1 Cufflinks exon211556097 211556267 . + . gene\_id "XLOC\_002294"; transcript\_id "TCONS\_00003956"; exon\_number "1";  
oId "CUFF.8181.8"; tss\_id "TSS2876";  
chr1 Cufflinks exon211564958 211565039 . + . gene\_id "XLOC\_002294"; transcript\_id "TCONS\_00003956"; exon\_number "2";  
oId "CUFF.8181.8"; tss\_id "TSS2876";  
chr1 Cufflinks exon211565169 211565318 . + . gene\_id "XLOC\_002294"; transcript\_id "TCONS\_00003956"; exon\_number "3";  
oId "CUFF.8181.8"; tss\_id "TSS2876";  
chr1 Cufflinks exon211570109 211570173 . + . gene\_id "XLOC\_002294"; transcript\_id "TCONS\_00003956"; exon\_number "4";  
oId "CUFF.8181.8"; tss\_id "TSS2876";  
chr1 Cufflinks exon211599553 211599625 . + . gene\_id "XLOC\_002294"; transcript\_id "TCONS\_00003956"; exon\_number "5";  
oId "CUFF.8181.8"; tss\_id "TSS2876";  
chr1 Cufflinks exon211605661 211605970 . + . gene\_id "XLOC\_002294"; transcript\_id "TCONS\_00003956"; exon\_number "6";  
oId "CUFF.8181.8"; tss\_id "TSS2876";  
chr1 Cufflinks exon213541663 213541732 . + . gene\_id "XLOC\_002328"; transcript\_id "TCONS\_00004002"; exon\_number "1";  
oId "CUFF.8298.1"; tss\_id "TSS2910";  
chr1 Cufflinks exon213552076 213552225 . + . gene\_id "XLOC\_002328"; transcript\_id "TCONS\_00004002"; exon\_number "2";  
oId "CUFF.8298.1"; tss\_id "TSS2910";  
chr1 Cufflinks exon213648264 213650534 . + . gene\_id "XLOC\_002328"; transcript\_id "TCONS\_00004002"; exon\_number "3";  
oId "CUFF.8298.1"; tss\_id "TSS2910";  
chr1 Cufflinks exon223317435 223317585 . + . gene\_id "XLOC\_002399"; transcript\_id "TCONS\_00004106"; exon\_number "1";  
oId "CUFF.8465.3"; tss\_id "TSS2988";  
chr1 Cufflinks exon223317879 223319188 . + . gene\_id "XLOC\_002399"; transcript\_id "TCONS\_00004106"; exon\_number "2";  
oId "CUFF.8465.3"; tss\_id "TSS2988";  
chr1 Cufflinks exon224622616 224622889 . + . gene\_id "XLOC\_002411"; transcript\_id "TCONS\_00004129"; exon\_number "1";  
oId "CUFF.8536.3"; tss\_id "TSS3003";  
chr1 Cufflinks exon224627336 224627476 . + . gene\_id "XLOC\_002411"; transcript\_id "TCONS\_00004129"; exon\_number "2";  
oId "CUFF.8536.3"; tss\_id "TSS3003";  
chr1 Cufflinks exon224628113 224629292 . + . gene\_id "XLOC\_002411"; transcript\_id "TCONS\_00004129"; exon\_number "3";  
oId "CUFF.8536.3"; tss\_id "TSS3003";  
chr1 Cufflinks exon224622616 224622889 . + . gene\_id "XLOC\_002411"; transcript\_id "TCONS\_00004130"; exon\_number "1";  
oId "CUFF.8536.2"; tss\_id "TSS3003";  
chr1 Cufflinks exon224701483 224701555 . + . gene\_id "XLOC\_002411"; transcript\_id "TCONS\_00004130"; exon\_number "2";  
oId "CUFF.8536.2"; tss\_id "TSS3003";  
chr1 Cufflinks exon224622617 224622889 . + . gene\_id "XLOC\_002411"; transcript\_id "TCONS\_00004131"; exon\_number "1";  
oId "CUFF.8536.5"; tss\_id "TSS3003";  
chr1 Cufflinks exon224627336 224627476 . + . gene\_id "XLOC\_002411"; transcript\_id "TCONS\_00004131"; exon\_number "2";  
oId "CUFF.8536.5"; tss\_id "TSS3003";

|                                      |           |   |   |   |                                                                         |
|--------------------------------------|-----------|---|---|---|-------------------------------------------------------------------------|
| chr1 Cufflinks exon224700791         | 224700968 | . | + | . | gene_id "XLOC_002411"; transcript_id "TCONS_00004131"; exon_number "3"; |
| oId "CUFF.8536.5"; tss_id "TSS3003"; |           |   |   |   |                                                                         |
| chr1 Cufflinks exon224622617         | 224622889 | . | + | . | gene_id "XLOC_002411"; transcript_id "TCONS_00004132"; exon_number "1"; |
| oId "CUFF.8536.7"; tss_id "TSS3003"; |           |   |   |   |                                                                         |
| chr1 Cufflinks exon224627336         | 224627476 | . | + | . | gene_id "XLOC_002411"; transcript_id "TCONS_00004132"; exon_number "2"; |
| oId "CUFF.8536.7"; tss_id "TSS3003"; |           |   |   |   |                                                                         |
| chr1 Cufflinks exon224701483         | 224701555 | . | + | . | gene_id "XLOC_002411"; transcript_id "TCONS_00004132"; exon_number "3"; |
| oId "CUFF.8536.7"; tss_id "TSS3003"; |           |   |   |   |                                                                         |
| chr1 Cufflinks exon224622617         | 224622889 | . | + | . | gene_id "XLOC_002411"; transcript_id "TCONS_00004134"; exon_number "1"; |
| oId "CUFF.8536.6"; tss_id "TSS3003"; |           |   |   |   |                                                                         |
| chr1 Cufflinks exon224627336         | 224627476 | . | + | . | gene_id "XLOC_002411"; transcript_id "TCONS_00004134"; exon_number "2"; |
| oId "CUFF.8536.6"; tss_id "TSS3003"; |           |   |   |   |                                                                         |
| chr1 Cufflinks exon224703443         | 224703578 | . | + | . | gene_id "XLOC_002411"; transcript_id "TCONS_00004134"; exon_number "3"; |
| oId "CUFF.8536.6"; tss_id "TSS3003"; |           |   |   |   |                                                                         |
| chr1 Cufflinks exon224770866         | 224770969 | . | + | . | gene_id "XLOC_002411"; transcript_id "TCONS_00004134"; exon_number "4"; |
| oId "CUFF.8536.6"; tss_id "TSS3003"; |           |   |   |   |                                                                         |
| chr1 Cufflinks exon224776063         | 224777897 | . | + | . | gene_id "XLOC_002411"; transcript_id "TCONS_00004134"; exon_number "5"; |
| oId "CUFF.8536.6"; tss_id "TSS3003"; |           |   |   |   |                                                                         |
| chr1 Cufflinks exon224622617         | 224622889 | . | + | . | gene_id "XLOC_002411"; transcript_id "TCONS_00004133"; exon_number "1"; |
| oId "CUFF.8536.4"; tss_id "TSS3003"; |           |   |   |   |                                                                         |
| chr1 Cufflinks exon224627336         | 224627476 | . | + | . | gene_id "XLOC_002411"; transcript_id "TCONS_00004133"; exon_number "2"; |
| oId "CUFF.8536.4"; tss_id "TSS3003"; |           |   |   |   |                                                                         |
| chr1 Cufflinks exon224703443         | 224703578 | . | + | . | gene_id "XLOC_002411"; transcript_id "TCONS_00004133"; exon_number "3"; |
| oId "CUFF.8536.4"; tss_id "TSS3003"; |           |   |   |   |                                                                         |
| chr1 Cufflinks exon224770866         | 224770969 | . | + | . | gene_id "XLOC_002411"; transcript_id "TCONS_00004133"; exon_number "4"; |
| oId "CUFF.8536.4"; tss_id "TSS3003"; |           |   |   |   |                                                                         |
| chr1 Cufflinks exon224776063         | 224776285 | . | + | . | gene_id "XLOC_002411"; transcript_id "TCONS_00004133"; exon_number "5"; |
| oId "CUFF.8536.4"; tss_id "TSS3003"; |           |   |   |   |                                                                         |
| chr1 Cufflinks exon224776690         | 224777897 | . | + | . | gene_id "XLOC_002411"; transcript_id "TCONS_00004133"; exon_number "6"; |
| oId "CUFF.8536.4"; tss_id "TSS3003"; |           |   |   |   |                                                                         |
| chr1 Cufflinks exon224640838         | 224642045 | . | + | . | gene_id "XLOC_002413"; transcript_id "TCONS_00004137"; exon_number "1"; |
| oId "CUFF.8541.1"; tss_id "TSS3008"; |           |   |   |   |                                                                         |
| chr1 Cufflinks exon224644561         | 224648214 | . | + | . | gene_id "XLOC_002413"; transcript_id "TCONS_00004137"; exon_number "2"; |
| oId "CUFF.8541.1"; tss_id "TSS3008"; |           |   |   |   |                                                                         |
| chr1 Cufflinks exon225652688         | 225653012 | . | + | . | gene_id "XLOC_002437"; transcript_id "TCONS_00004174"; exon_number "1"; |
| oId "CUFF.8610.2"; tss_id "TSS3033"; |           |   |   |   |                                                                         |
| chr1 Cufflinks exon225657507         | 225660073 | . | + | . | gene_id "XLOC_002437"; transcript_id "TCONS_00004174"; exon_number "2"; |
| oId "CUFF.8610.2"; tss_id "TSS3033"; |           |   |   |   |                                                                         |
| chr1 Cufflinks exon225652688         | 225653012 | . | + | . | gene_id "XLOC_002437"; transcript_id "TCONS_00004173"; exon_number "1"; |
| oId "CUFF.8610.1"; tss_id "TSS3033"; |           |   |   |   |                                                                         |
| chr1 Cufflinks exon225653281         | 225653353 | . | + | . | gene_id "XLOC_002437"; transcript_id "TCONS_00004173"; exon_number "2"; |
| oId "CUFF.8610.1"; tss_id "TSS3033"; |           |   |   |   |                                                                         |
| chr1 Cufflinks exon225657508         | 225660073 | . | + | . | gene_id "XLOC_002437"; transcript_id "TCONS_00004173"; exon_number "3"; |

oId "CUFF.8610.1"; tss\_id "TSS3033";  
chr1 Cufflinks exon225652742 225653012 . + . gene\_id "XLOC\_002437"; transcript\_id "TCONS\_00004175"; exon\_number "1";  
oId "CUFF.8610.3"; tss\_id "TSS3033";  
chr1 Cufflinks exon225653279 225653353 . + . gene\_id "XLOC\_002437"; transcript\_id "TCONS\_00004175"; exon\_number "2";  
oId "CUFF.8610.3"; tss\_id "TSS3033";  
chr1 Cufflinks exon225657508 225660073 . + . gene\_id "XLOC\_002437"; transcript\_id "TCONS\_00004175"; exon\_number "3";  
oId "CUFF.8610.3"; tss\_id "TSS3033";  
chr1 Cufflinks exon225653136 225653352 . + . gene\_id "XLOC\_002437"; transcript\_id "TCONS\_00004176"; exon\_number "1";  
oId "CUFF.8610.4"; tss\_id "TSS3034";  
chr1 Cufflinks exon225657507 225660073 . + . gene\_id "XLOC\_002437"; transcript\_id "TCONS\_00004176"; exon\_number "2";  
oId "CUFF.8610.4"; tss\_id "TSS3034";  
chr1 Cufflinks exon225655028 225656709 . + . gene\_id "XLOC\_002437"; transcript\_id "TCONS\_00004177"; exon\_number "1";  
oId "CUFF.8610.5"; tss\_id "TSS3035";  
chr1 Cufflinks exon225657507 225660073 . + . gene\_id "XLOC\_002437"; transcript\_id "TCONS\_00004177"; exon\_number "2";  
oId "CUFF.8610.5"; tss\_id "TSS3035";  
chr1 Cufflinks exon225655580 225655835 . + . gene\_id "XLOC\_002437"; transcript\_id "TCONS\_00004179"; exon\_number "1";  
oId "CUFF.8610.7"; tss\_id "TSS3036";  
chr1 Cufflinks exon225657507 225660073 . + . gene\_id "XLOC\_002437"; transcript\_id "TCONS\_00004179"; exon\_number "2";  
oId "CUFF.8610.7"; tss\_id "TSS3036";  
chr1 Cufflinks exon226536550 226537035 . + . gene\_id "XLOC\_002453"; transcript\_id "TCONS\_00004198"; exon\_number "1";  
oId "CUFF.8664.1"; tss\_id "TSS3052";  
chr1 Cufflinks exon226538216 226538672 . + . gene\_id "XLOC\_002453"; transcript\_id "TCONS\_00004198"; exon\_number "2";  
oId "CUFF.8664.1"; tss\_id "TSS3052";  
chr1 Cufflinks exon226536550 226537035 . + . gene\_id "XLOC\_002453"; transcript\_id "TCONS\_00004199"; exon\_number "1";  
oId "CUFF.8664.2"; tss\_id "TSS3052";  
chr1 Cufflinks exon226541242 226541457 . + . gene\_id "XLOC\_002453"; transcript\_id "TCONS\_00004199"; exon\_number "2";  
oId "CUFF.8664.2"; tss\_id "TSS3052";  
chr1 Cufflinks exon228594702 228594727 . + . gene\_id "XLOC\_002498"; transcript\_id "TCONS\_00004265"; exon\_number "1";  
oId "CUFF.8790.1"; tss\_id "TSS3103";  
chr1 Cufflinks exon228594971 228595179 . + . gene\_id "XLOC\_002498"; transcript\_id "TCONS\_00004265"; exon\_number "2";  
oId "CUFF.8790.1"; tss\_id "TSS3103";  
chr1 Cufflinks exon228597823 228604326 . + . gene\_id "XLOC\_002498"; transcript\_id "TCONS\_00004265"; exon\_number "3";  
oId "CUFF.8790.1"; tss\_id "TSS3103";  
chr1 Cufflinks exon228594848 228599714 . + . gene\_id "XLOC\_002498"; transcript\_id "TCONS\_00004266"; exon\_number "1";  
oId "CUFF.8790.2"; tss\_id "TSS3104";  
chr1 Cufflinks exon228599821 228604326 . + . gene\_id "XLOC\_002498"; transcript\_id "TCONS\_00004266"; exon\_number "2";  
oId "CUFF.8790.2"; tss\_id "TSS3104";  
chr1 Cufflinks exon228594944 228595027 . + . gene\_id "XLOC\_002498"; transcript\_id "TCONS\_00004267"; exon\_number "1";  
oId "CUFF.8790.4"; tss\_id "TSS3104";  
chr1 Cufflinks exon228595123 228595179 . + . gene\_id "XLOC\_002498"; transcript\_id "TCONS\_00004267"; exon\_number "2";  
oId "CUFF.8790.4"; tss\_id "TSS3104";  
chr1 Cufflinks exon228600532 228604326 . + . gene\_id "XLOC\_002498"; transcript\_id "TCONS\_00004267"; exon\_number "3";  
oId "CUFF.8790.4"; tss\_id "TSS3104";

|                                      |           |   |   |   |                                                                         |
|--------------------------------------|-----------|---|---|---|-------------------------------------------------------------------------|
| chr1 Cufflinks exon229389049         | 229389229 | . | + | . | gene_id "XLOC_002520"; transcript_id "TCONS_00004293"; exon_number "1"; |
| oId "CUFF.8861.1"; tss_id "TSS3127"; |           |   |   |   |                                                                         |
| chr1 Cufflinks exon229393826         | 229393997 | . | + | . | gene_id "XLOC_002520"; transcript_id "TCONS_00004293"; exon_number "2"; |
| oId "CUFF.8861.1"; tss_id "TSS3127"; |           |   |   |   |                                                                         |
| chr1 Cufflinks exon230274136         | 230274201 | . | + | . | gene_id "XLOC_002535"; transcript_id "TCONS_00004312"; exon_number "1"; |
| oId "CUFF.8899.1"; tss_id "TSS3142"; |           |   |   |   |                                                                         |
| chr1 Cufflinks exon230418749         | 230420159 | . | + | . | gene_id "XLOC_002535"; transcript_id "TCONS_00004312"; exon_number "2"; |
| oId "CUFF.8899.1"; tss_id "TSS3142"; |           |   |   |   |                                                                         |
| chr1 Cufflinks exon230418017         | 230418677 | . | + | . | gene_id "XLOC_002535"; transcript_id "TCONS_00004314"; exon_number "1"; |
| oId "CUFF.8899.3"; tss_id "TSS3143"; |           |   |   |   |                                                                         |
| chr1 Cufflinks exon230419005         | 230420159 | . | + | . | gene_id "XLOC_002535"; transcript_id "TCONS_00004314"; exon_number "2"; |
| oId "CUFF.8899.3"; tss_id "TSS3143"; |           |   |   |   |                                                                         |
| chr1 Cufflinks exon234859789         | 234859829 | . | + | . | gene_id "XLOC_002612"; transcript_id "TCONS_00004421"; exon_number "1"; |
| oId "CUFF.9106.2"; tss_id "TSS3228"; |           |   |   |   |                                                                         |
| chr1 Cufflinks exon234860970         | 234861425 | . | + | . | gene_id "XLOC_002612"; transcript_id "TCONS_00004421"; exon_number "2"; |
| oId "CUFF.9106.2"; tss_id "TSS3228"; |           |   |   |   |                                                                         |
| chr1 Cufflinks exon234864095         | 234867390 | . | + | . | gene_id "XLOC_002612"; transcript_id "TCONS_00004421"; exon_number "3"; |
| oId "CUFF.9106.2"; tss_id "TSS3228"; |           |   |   |   |                                                                         |
| chr1 Cufflinks exon234859789         | 234859829 | . | + | . | gene_id "XLOC_002612"; transcript_id "TCONS_00004420"; exon_number "1"; |
| oId "CUFF.9106.1"; tss_id "TSS3228"; |           |   |   |   |                                                                         |
| chr1 Cufflinks exon234860970         | 234861425 | . | + | . | gene_id "XLOC_002612"; transcript_id "TCONS_00004420"; exon_number "2"; |
| oId "CUFF.9106.1"; tss_id "TSS3228"; |           |   |   |   |                                                                         |
| chr1 Cufflinks exon234864526         | 234867390 | . | + | . | gene_id "XLOC_002612"; transcript_id "TCONS_00004420"; exon_number "3"; |
| oId "CUFF.9106.1"; tss_id "TSS3228"; |           |   |   |   |                                                                         |
| chr1 Cufflinks exon234861892         | 234862262 | . | + | . | gene_id "XLOC_002613"; transcript_id "TCONS_00004422"; exon_number "1"; |
| oId "CUFF.9107.1"; tss_id "TSS3229"; |           |   |   |   |                                                                         |
| chr1 Cufflinks exon234862364         | 234862567 | . | + | . | gene_id "XLOC_002613"; transcript_id "TCONS_00004422"; exon_number "2"; |
| oId "CUFF.9107.1"; tss_id "TSS3229"; |           |   |   |   |                                                                         |
| chr1 Cufflinks exon242062024         | 242062931 | . | + | . | gene_id "XLOC_002647"; transcript_id "TCONS_00004484"; exon_number "1"; |
| oId "CUFF.9239.1"; tss_id "TSS3272"; |           |   |   |   |                                                                         |
| chr1 Cufflinks exon242063444         | 242066874 | . | + | . | gene_id "XLOC_002647"; transcript_id "TCONS_00004484"; exon_number "2"; |
| oId "CUFF.9239.1"; tss_id "TSS3272"; |           |   |   |   |                                                                         |
| chr1 Cufflinks exon242072178         | 242072365 | . | + | . | gene_id "XLOC_002650"; transcript_id "TCONS_00004488"; exon_number "1"; |
| oId "CUFF.9245.2"; tss_id "TSS3275"; |           |   |   |   |                                                                         |
| chr1 Cufflinks exon242072887         | 242073019 | . | + | . | gene_id "XLOC_002650"; transcript_id "TCONS_00004488"; exon_number "2"; |
| oId "CUFF.9245.2"; tss_id "TSS3275"; |           |   |   |   |                                                                         |
| chr1 Cufflinks exon242089298         | 242089861 | . | + | . | gene_id "XLOC_002650"; transcript_id "TCONS_00004488"; exon_number "3"; |
| oId "CUFF.9245.2"; tss_id "TSS3275"; |           |   |   |   |                                                                         |
| chr1 Cufflinks exon242072178         | 242072365 | . | + | . | gene_id "XLOC_002650"; transcript_id "TCONS_00004487"; exon_number "1"; |
| oId "CUFF.9245.1"; tss_id "TSS3275"; |           |   |   |   |                                                                         |
| chr1 Cufflinks exon242089298         | 242089861 | . | + | . | gene_id "XLOC_002650"; transcript_id "TCONS_00004487"; exon_number "2"; |
| oId "CUFF.9245.1"; tss_id "TSS3275"; |           |   |   |   |                                                                         |
| chr1 Cufflinks exon242072551         | 242073019 | . | + | . | gene_id "XLOC_002650"; transcript_id "TCONS_00004489"; exon_number "1"; |

oId "CUFF.9245.3"; tss\_id "TSS3276";  
chr1 Cufflinks exon242074676 242074875 . + . gene\_id "XLOC\_002650"; transcript\_id "TCONS\_00004489"; exon\_number "2";  
oId "CUFF.9245.3"; tss\_id "TSS3276";  
chr1 Cufflinks exon242089298 242089861 . + . gene\_id "XLOC\_002650"; transcript\_id "TCONS\_00004489"; exon\_number "3";  
oId "CUFF.9245.3"; tss\_id "TSS3276";  
chr1 Cufflinks exon246931694 246939570 . + . gene\_id "XLOC\_002682"; transcript\_id "TCONS\_00004536"; exon\_number "1";  
oId "CUFF.9355.2"; tss\_id "TSS3316";  
chr1 Cufflinks exon246940281 246940404 . + . gene\_id "XLOC\_002682"; transcript\_id "TCONS\_00004536"; exon\_number "2";  
oId "CUFF.9355.2"; tss\_id "TSS3316";  
chr1 Cufflinks exon246943686 246943885 . + . gene\_id "XLOC\_002682"; transcript\_id "TCONS\_00004536"; exon\_number "3";  
oId "CUFF.9355.2"; tss\_id "TSS3316";  
chr1 Cufflinks exon246952810 246953000 . + . gene\_id "XLOC\_002682"; transcript\_id "TCONS\_00004536"; exon\_number "4";  
oId "CUFF.9355.2"; tss\_id "TSS3316";  
chr1 Cufflinks exon246953748 246955310 . + . gene\_id "XLOC\_002682"; transcript\_id "TCONS\_00004536"; exon\_number "5";  
oId "CUFF.9355.2"; tss\_id "TSS3316";  
chr1 Cufflinks exon246946668 246947096 . + . gene\_id "XLOC\_002682"; transcript\_id "TCONS\_00004538"; exon\_number "1";  
oId "CUFF.9355.4"; tss\_id "TSS3317";  
chr1 Cufflinks exon246947180 246947345 . + . gene\_id "XLOC\_002682"; transcript\_id "TCONS\_00004538"; exon\_number "2";  
oId "CUFF.9355.4"; tss\_id "TSS3317";  
chr1 Cufflinks exon246952919 246953000 . + . gene\_id "XLOC\_002682"; transcript\_id "TCONS\_00004538"; exon\_number "3";  
oId "CUFF.9355.4"; tss\_id "TSS3317";  
chr1 Cufflinks exon246953748 246955310 . + . gene\_id "XLOC\_002682"; transcript\_id "TCONS\_00004538"; exon\_number "4";  
oId "CUFF.9355.4"; tss\_id "TSS3317";  
chr1 Cufflinks exon247494436 247495783 . + . gene\_id "XLOC\_002694"; transcript\_id "TCONS\_00004550"; exon\_number "1";  
oId "CUFF.9440.2"; tss\_id "TSS3330";  
chr1 Cufflinks exon247496030 247497728 . + . gene\_id "XLOC\_002694"; transcript\_id "TCONS\_00004550"; exon\_number "2";  
oId "CUFF.9440.2"; tss\_id "TSS3330";  
chr1 Cufflinks exon247521084 247521105 . + . gene\_id "XLOC\_002694"; transcript\_id "TCONS\_00004550"; exon\_number "3";  
oId "CUFF.9440.2"; tss\_id "TSS3330";  
chr1 Cufflinks exon852198 853100 . - . gene\_id "XLOC\_002748"; transcript\_id "TCONS\_00004635"; exon\_number "1"; oId  
"CUFF.69.1"; tss\_id "TSS3396";  
chr1 Cufflinks exon853402 853495 . - . gene\_id "XLOC\_002748"; transcript\_id "TCONS\_00004635"; exon\_number "2"; oId  
"CUFF.69.1"; tss\_id "TSS3396";  
chr1 Cufflinks exon854205 854295 . - . gene\_id "XLOC\_002748"; transcript\_id "TCONS\_00004635"; exon\_number "3"; oId  
"CUFF.69.1"; tss\_id "TSS3396";  
chr1 Cufflinks exon854715 855072 . - . gene\_id "XLOC\_002748"; transcript\_id "TCONS\_00004635"; exon\_number "4"; oId  
"CUFF.69.1"; tss\_id "TSS3396";  
chr1 Cufflinks exon1070493 1071564 . - . gene\_id "XLOC\_002761"; transcript\_id "TCONS\_00004657"; exon\_number "1"; oId  
"CUFF.108.1"; tss\_id "TSS3414";  
chr1 Cufflinks exon1078093 1078635 . - . gene\_id "XLOC\_002761"; transcript\_id "TCONS\_00004657"; exon\_number "2"; oId  
"CUFF.108.1"; tss\_id "TSS3414";  
chr1 Cufflinks exon1542730 1542747 . - . gene\_id "XLOC\_002799"; transcript\_id "TCONS\_00004715"; exon\_number "1"; oId  
"CUFF.199.1"; tss\_id "TSS3461";

chr1 Cufflinks exon1549150 1551515 . - . gene\_id "XLOC\_002799"; transcript\_id "TCONS\_00004715"; exon\_number "2"; oId "CUFF.199.1"; tss\_id "TSS3461";

chr1 Cufflinks exon3652134 3655899 . - . gene\_id "XLOC\_002857"; transcript\_id "TCONS\_00004826"; exon\_number "1"; oId "CUFF.331.4"; tss\_id "TSS3535";

chr1 Cufflinks exon3655936 3655971 . - . gene\_id "XLOC\_002857"; transcript\_id "TCONS\_00004826"; exon\_number "2"; oId "CUFF.331.4"; tss\_id "TSS3535";

chr1 Cufflinks exon3656400 3656951 . - . gene\_id "XLOC\_002857"; transcript\_id "TCONS\_00004826"; exon\_number "3"; oId "CUFF.331.4"; tss\_id "TSS3535";

chr1 Cufflinks exon3659368 3659475 . - . gene\_id "XLOC\_002857"; transcript\_id "TCONS\_00004826"; exon\_number "4"; oId "CUFF.331.4"; tss\_id "TSS3535";

chr1 Cufflinks exon3659625 3659754 . - . gene\_id "XLOC\_002857"; transcript\_id "TCONS\_00004826"; exon\_number "5"; oId "CUFF.331.4"; tss\_id "TSS3535";

chr1 Cufflinks exon3662171 3663937 . - . gene\_id "XLOC\_002857"; transcript\_id "TCONS\_00004826"; exon\_number "6"; oId "CUFF.331.4"; tss\_id "TSS3535";

chr1 Cufflinks exon3652134 3655077 . - . gene\_id "XLOC\_002857"; transcript\_id "TCONS\_00004825"; exon\_number "1"; oId "CUFF.331.3"; tss\_id "TSS3535";

chr1 Cufflinks exon3656797 3656951 . - . gene\_id "XLOC\_002857"; transcript\_id "TCONS\_00004825"; exon\_number "2"; oId "CUFF.331.3"; tss\_id "TSS3535";

chr1 Cufflinks exon3659368 3659475 . - . gene\_id "XLOC\_002857"; transcript\_id "TCONS\_00004825"; exon\_number "3"; oId "CUFF.331.3"; tss\_id "TSS3535";

chr1 Cufflinks exon3659625 3659754 . - . gene\_id "XLOC\_002857"; transcript\_id "TCONS\_00004825"; exon\_number "4"; oId "CUFF.331.3"; tss\_id "TSS3535";

chr1 Cufflinks exon3662171 3663937 . - . gene\_id "XLOC\_002857"; transcript\_id "TCONS\_00004825"; exon\_number "5"; oId "CUFF.331.3"; tss\_id "TSS3535";

chr1 Cufflinks exon3652134 3656951 . - . gene\_id "XLOC\_002857"; transcript\_id "TCONS\_00004824"; exon\_number "1"; oId "CUFF.331.2"; tss\_id "TSS3535";

chr1 Cufflinks exon3659368 3659475 . - . gene\_id "XLOC\_002857"; transcript\_id "TCONS\_00004824"; exon\_number "2"; oId "CUFF.331.2"; tss\_id "TSS3535";

chr1 Cufflinks exon3659625 3659754 . - . gene\_id "XLOC\_002857"; transcript\_id "TCONS\_00004824"; exon\_number "3"; oId "CUFF.331.2"; tss\_id "TSS3535";

chr1 Cufflinks exon3662171 3663937 . - . gene\_id "XLOC\_002857"; transcript\_id "TCONS\_00004824"; exon\_number "4"; oId "CUFF.331.2"; tss\_id "TSS3535";

chr1 Cufflinks exon3652134 3653122 . - . gene\_id "XLOC\_002857"; transcript\_id "TCONS\_00004827"; exon\_number "1"; oId "CUFF.331.1"; tss\_id "TSS3535";

chr1 Cufflinks exon3653490 3655899 . - . gene\_id "XLOC\_002857"; transcript\_id "TCONS\_00004827"; exon\_number "2"; oId "CUFF.331.1"; tss\_id "TSS3535";

chr1 Cufflinks exon3655936 3656951 . - . gene\_id "XLOC\_002857"; transcript\_id "TCONS\_00004827"; exon\_number "3"; oId "CUFF.331.1"; tss\_id "TSS3535";

chr1 Cufflinks exon3659368 3659475 . - . gene\_id "XLOC\_002857"; transcript\_id "TCONS\_00004827"; exon\_number "4"; oId "CUFF.331.1"; tss\_id "TSS3535";

chr1 Cufflinks exon3662171 3662750 . - . gene\_id "XLOC\_002857"; transcript\_id "TCONS\_00004827"; exon\_number "5"; oId "CUFF.331.1"; tss\_id "TSS3535";

chr1 Cufflinks exon3663001 3663944 . - . gene\_id "XLOC\_002857"; transcript\_id "TCONS\_00004827"; exon\_number "6"; oId

"CUFF.331.1"; tss\_id "TSS3535";  
chr1 Cufflinks exon4074980 4076767 . - . gene\_id "XLOC\_002864"; transcript\_id "TCONS\_00004836"; exon\_number "1"; oId  
"CUFF.358.3"; tss\_id "TSS3542";  
chr1 Cufflinks exon4078539 4083104 . - . gene\_id "XLOC\_002864"; transcript\_id "TCONS\_00004836"; exon\_number "2"; oId  
"CUFF.358.3"; tss\_id "TSS3542";  
chr1 Cufflinks exon4093164 4093661 . - . gene\_id "XLOC\_002864"; transcript\_id "TCONS\_00004836"; exon\_number "3"; oId  
"CUFF.358.3"; tss\_id "TSS3542";  
chr1 Cufflinks exon4103796 4104830 . - . gene\_id "XLOC\_002864"; transcript\_id "TCONS\_00004836"; exon\_number "4"; oId  
"CUFF.358.3"; tss\_id "TSS3542";  
chr1 Cufflinks exon4106596 4107162 . - . gene\_id "XLOC\_002864"; transcript\_id "TCONS\_00004836"; exon\_number "5"; oId  
"CUFF.358.3"; tss\_id "TSS3542";  
chr1 Cufflinks exon4074980 4076766 . - . gene\_id "XLOC\_002864"; transcript\_id "TCONS\_00004835"; exon\_number "1"; oId  
"CUFF.358.2"; tss\_id "TSS3542";  
chr1 Cufflinks exon4078538 4083104 . - . gene\_id "XLOC\_002864"; transcript\_id "TCONS\_00004835"; exon\_number "2"; oId  
"CUFF.358.2"; tss\_id "TSS3542";  
chr1 Cufflinks exon4093164 4093661 . - . gene\_id "XLOC\_002864"; transcript\_id "TCONS\_00004835"; exon\_number "3"; oId  
"CUFF.358.2"; tss\_id "TSS3542";  
chr1 Cufflinks exon4106596 4106827 . - . gene\_id "XLOC\_002864"; transcript\_id "TCONS\_00004835"; exon\_number "4"; oId  
"CUFF.358.2"; tss\_id "TSS3542";  
chr1 Cufflinks exon4106934 4107162 . - . gene\_id "XLOC\_002864"; transcript\_id "TCONS\_00004835"; exon\_number "5"; oId  
"CUFF.358.2"; tss\_id "TSS3542";  
chr1 Cufflinks exon4074980 4076766 . - . gene\_id "XLOC\_002864"; transcript\_id "TCONS\_00004834"; exon\_number "1"; oId  
"CUFF.358.1"; tss\_id "TSS3542";  
chr1 Cufflinks exon4078538 4083104 . - . gene\_id "XLOC\_002864"; transcript\_id "TCONS\_00004834"; exon\_number "2"; oId  
"CUFF.358.1"; tss\_id "TSS3542";  
chr1 Cufflinks exon4106596 4106828 . - . gene\_id "XLOC\_002864"; transcript\_id "TCONS\_00004834"; exon\_number "3"; oId  
"CUFF.358.1"; tss\_id "TSS3542";  
chr1 Cufflinks exon4106935 4107162 . - . gene\_id "XLOC\_002864"; transcript\_id "TCONS\_00004834"; exon\_number "4"; oId  
"CUFF.358.1"; tss\_id "TSS3542";  
chr1 Cufflinks exon4078528 4083104 . - . gene\_id "XLOC\_002864"; transcript\_id "TCONS\_00004837"; exon\_number "1"; oId  
"CUFF.358.4"; tss\_id "TSS3542";  
chr1 Cufflinks exon4093164 4093661 . - . gene\_id "XLOC\_002864"; transcript\_id "TCONS\_00004837"; exon\_number "2"; oId  
"CUFF.358.4"; tss\_id "TSS3542";  
chr1 Cufflinks exon4103796 4104830 . - . gene\_id "XLOC\_002864"; transcript\_id "TCONS\_00004837"; exon\_number "3"; oId  
"CUFF.358.4"; tss\_id "TSS3542";  
chr1 Cufflinks exon4106596 4106687 . - . gene\_id "XLOC\_002864"; transcript\_id "TCONS\_00004837"; exon\_number "4"; oId  
"CUFF.358.4"; tss\_id "TSS3542";  
chr1 Cufflinks exon4106934 4107162 . - . gene\_id "XLOC\_002864"; transcript\_id "TCONS\_00004837"; exon\_number "5"; oId  
"CUFF.358.4"; tss\_id "TSS3542";  
chr1 Cufflinks exon6663073 6664707 . - . gene\_id "XLOC\_002901"; transcript\_id "TCONS\_00004903"; exon\_number "1"; oId  
"CUFF.441.2"; tss\_id "TSS3590";  
chr1 Cufflinks exon6672752 6673472 . - . gene\_id "XLOC\_002901"; transcript\_id "TCONS\_00004903"; exon\_number "2"; oId  
"CUFF.441.2"; tss\_id "TSS3590";



chr1 Cufflinks exon6669278 6672966 . - . gene\_id "XLOC\_002901"; transcript\_id "TCONS\_00004904"; exon\_number "1"; oId "CUFF.441.3"; tss\_id "TSS3590";

chr1 Cufflinks exon6673057 6673472 . - . gene\_id "XLOC\_002901"; transcript\_id "TCONS\_00004904"; exon\_number "2"; oId "CUFF.441.3"; tss\_id "TSS3590";

chr1 Cufflinks exon9431597 9432447 . - . gene\_id "XLOC\_002914"; transcript\_id "TCONS\_00004928"; exon\_number "1"; oId "CUFF.511.1"; tss\_id "TSS3607";

chr1 Cufflinks exon9433200 9433241 . - . gene\_id "XLOC\_002914"; transcript\_id "TCONS\_00004928"; exon\_number "2"; oId "CUFF.511.1"; tss\_id "TSS3607";

chr1 Cufflinks exon9467189 9467682 . - . gene\_id "XLOC\_002920"; transcript\_id "TCONS\_00004934"; exon\_number "1"; oId "CUFF.525.2"; tss\_id "TSS3613";

chr1 Cufflinks exon9726707 9726728 . - . gene\_id "XLOC\_002920"; transcript\_id "TCONS\_00004934"; exon\_number "2"; oId "CUFF.525.2"; tss\_id "TSS3613";

chr1 Cufflinks exon9482204 9483270 . - . gene\_id "XLOC\_002926"; transcript\_id "TCONS\_00004941"; exon\_number "1"; oId "CUFF.536.2"; tss\_id "TSS3620";

chr1 Cufflinks exon9485723 9487289 . - . gene\_id "XLOC\_002926"; transcript\_id "TCONS\_00004941"; exon\_number "2"; oId "CUFF.536.2"; tss\_id "TSS3620";

chr1 Cufflinks exon9482204 9483270 . - . gene\_id "XLOC\_002926"; transcript\_id "TCONS\_00004942"; exon\_number "1"; oId "CUFF.536.1"; tss\_id "TSS3621";

chr1 Cufflinks exon9485612 9487440 . - . gene\_id "XLOC\_002926"; transcript\_id "TCONS\_00004942"; exon\_number "2"; oId "CUFF.536.1"; tss\_id "TSS3621";

chr1 Cufflinks exon9488981 9489055 . - . gene\_id "XLOC\_002926"; transcript\_id "TCONS\_00004942"; exon\_number "3"; oId "CUFF.536.1"; tss\_id "TSS3621";

chr1 Cufflinks exon9485136 9487440 . - . gene\_id "XLOC\_002926"; transcript\_id "TCONS\_00004944"; exon\_number "1"; oId "CUFF.536.4"; tss\_id "TSS3622";

chr1 Cufflinks exon9488666 9488765 . - . gene\_id "XLOC\_002926"; transcript\_id "TCONS\_00004944"; exon\_number "2"; oId "CUFF.536.4"; tss\_id "TSS3622";

chr1 Cufflinks exon9485136 9487440 . - . gene\_id "XLOC\_002926"; transcript\_id "TCONS\_00004945"; exon\_number "1"; oId "CUFF.536.7"; tss\_id "TSS3621";

chr1 Cufflinks exon9488901 9488975 . - . gene\_id "XLOC\_002926"; transcript\_id "TCONS\_00004945"; exon\_number "2"; oId "CUFF.536.7"; tss\_id "TSS3621";

chr1 Cufflinks exon9485136 9487440 . - . gene\_id "XLOC\_002926"; transcript\_id "TCONS\_00004947"; exon\_number "1"; oId "CUFF.536.6"; tss\_id "TSS3621";

chr1 Cufflinks exon9488981 9489055 . - . gene\_id "XLOC\_002926"; transcript\_id "TCONS\_00004947"; exon\_number "2"; oId "CUFF.536.6"; tss\_id "TSS3621";

chr1 Cufflinks exon9485136 9487440 . - . gene\_id "XLOC\_002926"; transcript\_id "TCONS\_00004946"; exon\_number "1"; oId "CUFF.536.5"; tss\_id "TSS3621";

chr1 Cufflinks exon9488926 9489055 . - . gene\_id "XLOC\_002926"; transcript\_id "TCONS\_00004946"; exon\_number "2"; oId "CUFF.536.5"; tss\_id "TSS3621";

chr1 Cufflinks exon11785689 11785883 . - . gene\_id "XLOC\_002955"; transcript\_id "TCONS\_00005000"; exon\_number "1"; oId "CUFF.668.1"; tss\_id "TSS3664";

chr1 Cufflinks exon11786445 11786601 . - . gene\_id "XLOC\_002955"; transcript\_id "TCONS\_00005000"; exon\_number "2"; oId "CUFF.668.1"; tss\_id "TSS3664";

chr1 Cufflinks exon11791787 11791888 . - . gene\_id "XLOC\_002955"; transcript\_id "TCONS\_00005000"; exon\_number "3";

oId "CUFF.668.1"; tss\_id "TSS3664";  
chr1 Cufflinks exon16931538 16931715 . - . gene\_id "XLOC\_003008"; transcript\_id "TCONS\_00005074"; exon\_number "1";  
oId "CUFF.890.1"; tss\_id "TSS3729";  
chr1 Cufflinks exon16965444 16966501 . - . gene\_id "XLOC\_003008"; transcript\_id "TCONS\_00005074"; exon\_number "2";  
oId "CUFF.890.1"; tss\_id "TSS3729";  
chr1 Cufflinks exon20509451 20511117 . - . gene\_id "XLOC\_003050"; transcript\_id "TCONS\_00005172"; exon\_number "1";  
oId "CUFF.1021.2"; tss\_id "TSS3801";  
chr1 Cufflinks exon20512851 20513033 . - . gene\_id "XLOC\_003050"; transcript\_id "TCONS\_00005172"; exon\_number "2";  
oId "CUFF.1021.2"; tss\_id "TSS3801";  
chr1 Cufflinks exon20509451 20511117 . - . gene\_id "XLOC\_003050"; transcript\_id "TCONS\_00005173"; exon\_number "1";  
oId "CUFF.1021.1"; tss\_id "TSS3801";  
chr1 Cufflinks exon20512853 20513046 . - . gene\_id "XLOC\_003050"; transcript\_id "TCONS\_00005173"; exon\_number "2";  
oId "CUFF.1021.1"; tss\_id "TSS3801";  
chr1 Cufflinks exon22350487 22350940 . - . gene\_id "XLOC\_003079"; transcript\_id "TCONS\_00005235"; exon\_number "1";  
oId "CUFF.1092.2"; tss\_id "TSS3847";  
chr1 Cufflinks exon22351299 22351582 . - . gene\_id "XLOC\_003079"; transcript\_id "TCONS\_00005235"; exon\_number "2";  
oId "CUFF.1092.2"; tss\_id "TSS3847";  
chr1 Cufflinks exon22350487 22350938 . - . gene\_id "XLOC\_003079"; transcript\_id "TCONS\_00005236"; exon\_number "1";  
oId "CUFF.1092.1"; tss\_id "TSS3848";  
chr1 Cufflinks exon22351299 22351459 . - . gene\_id "XLOC\_003079"; transcript\_id "TCONS\_00005236"; exon\_number "2";  
oId "CUFF.1092.1"; tss\_id "TSS3848";  
chr1 Cufflinks exon22352457 22352541 . - . gene\_id "XLOC\_003079"; transcript\_id "TCONS\_00005236"; exon\_number "3";  
oId "CUFF.1092.1"; tss\_id "TSS3848";  
chr1 Cufflinks exon22974568 22974750 . - . gene\_id "XLOC\_003081"; transcript\_id "TCONS\_00005238"; exon\_number "1";  
oId "CUFF.1123.1"; tss\_id "TSS3850";  
chr1 Cufflinks exon22989667 22989765 . - . gene\_id "XLOC\_003081"; transcript\_id "TCONS\_00005238"; exon\_number "2";  
oId "CUFF.1123.1"; tss\_id "TSS3850";  
chr1 Cufflinks exon23606565 23610903 . - . gene\_id "XLOC\_003087"; transcript\_id "TCONS\_00005246"; exon\_number "1";  
oId "CUFF.1140.6"; tss\_id "TSS3857";  
chr1 Cufflinks exon23611603 23612011 . - . gene\_id "XLOC\_003087"; transcript\_id "TCONS\_00005246"; exon\_number "2";  
oId "CUFF.1140.6"; tss\_id "TSS3857";  
chr1 Cufflinks exon23606565 23609606 . - . gene\_id "XLOC\_003087"; transcript\_id "TCONS\_00005247"; exon\_number "1";  
oId "CUFF.1140.3"; tss\_id "TSS3858";  
chr1 Cufflinks exon23610488 23610642 . - . gene\_id "XLOC\_003087"; transcript\_id "TCONS\_00005247"; exon\_number "2";  
oId "CUFF.1140.3"; tss\_id "TSS3858";  
chr1 Cufflinks exon23612055 23612121 . - . gene\_id "XLOC\_003087"; transcript\_id "TCONS\_00005247"; exon\_number "3";  
oId "CUFF.1140.3"; tss\_id "TSS3858";  
chr1 Cufflinks exon23614513 23614526 . - . gene\_id "XLOC\_003087"; transcript\_id "TCONS\_00005247"; exon\_number "4";  
oId "CUFF.1140.3"; tss\_id "TSS3858";  
chr1 Cufflinks exon23606565 23609606 . - . gene\_id "XLOC\_003087"; transcript\_id "TCONS\_00005248"; exon\_number "1";  
oId "CUFF.1140.2"; tss\_id "TSS3859";  
chr1 Cufflinks exon23610488 23610642 . - . gene\_id "XLOC\_003087"; transcript\_id "TCONS\_00005248"; exon\_number "2";  
oId "CUFF.1140.2"; tss\_id "TSS3859";

|                                      |          |   |   |   |                                                                         |
|--------------------------------------|----------|---|---|---|-------------------------------------------------------------------------|
| chr1 Cufflinks exon23612055          | 23614708 | . | - | . | gene_id "XLOC_003087"; transcript_id "TCONS_00005248"; exon_number "3"; |
| oId "CUFF.1140.2"; tss_id "TSS3859"; |          |   |   |   |                                                                         |
| chr1 Cufflinks exon23606565          | 23609606 | . | - | . | gene_id "XLOC_003087"; transcript_id "TCONS_00005251"; exon_number "1"; |
| oId "CUFF.1140.5"; tss_id "TSS3860"; |          |   |   |   |                                                                         |
| chr1 Cufflinks exon23610488          | 23610642 | . | - | . | gene_id "XLOC_003087"; transcript_id "TCONS_00005251"; exon_number "2"; |
| oId "CUFF.1140.5"; tss_id "TSS3860"; |          |   |   |   |                                                                         |
| chr1 Cufflinks exon23615053          | 23615625 | . | - | . | gene_id "XLOC_003087"; transcript_id "TCONS_00005251"; exon_number "3"; |
| oId "CUFF.1140.5"; tss_id "TSS3860"; |          |   |   |   |                                                                         |
| chr1 Cufflinks exon23606565          | 23610642 | . | - | . | gene_id "XLOC_003087"; transcript_id "TCONS_00005250"; exon_number "1"; |
| oId "CUFF.1140.4"; tss_id "TSS3860"; |          |   |   |   |                                                                         |
| chr1 Cufflinks exon23612055          | 23615625 | . | - | . | gene_id "XLOC_003087"; transcript_id "TCONS_00005250"; exon_number "2"; |
| oId "CUFF.1140.4"; tss_id "TSS3860"; |          |   |   |   |                                                                         |
| chr1 Cufflinks exon23874667          | 23875934 | . | - | . | gene_id "XLOC_003094"; transcript_id "TCONS_00005271"; exon_number "1"; |
| oId "CUFF.1153.2"; tss_id "TSS3872"; |          |   |   |   |                                                                         |
| chr1 Cufflinks exon23878112          | 23878204 | . | - | . | gene_id "XLOC_003094"; transcript_id "TCONS_00005271"; exon_number "2"; |
| oId "CUFF.1153.2"; tss_id "TSS3872"; |          |   |   |   |                                                                         |
| chr1 Cufflinks exon23878411          | 23880925 | . | - | . | gene_id "XLOC_003094"; transcript_id "TCONS_00005271"; exon_number "3"; |
| oId "CUFF.1153.2"; tss_id "TSS3872"; |          |   |   |   |                                                                         |
| chr1 Cufflinks exon23874667          | 23875934 | . | - | . | gene_id "XLOC_003094"; transcript_id "TCONS_00005272"; exon_number "1"; |
| oId "CUFF.1153.6"; tss_id "TSS3873"; |          |   |   |   |                                                                         |
| chr1 Cufflinks exon23877256          | 23877947 | . | - | . | gene_id "XLOC_003094"; transcript_id "TCONS_00005272"; exon_number "2"; |
| oId "CUFF.1153.6"; tss_id "TSS3873"; |          |   |   |   |                                                                         |
| chr1 Cufflinks exon23878112          | 23878204 | . | - | . | gene_id "XLOC_003094"; transcript_id "TCONS_00005272"; exon_number "3"; |
| oId "CUFF.1153.6"; tss_id "TSS3873"; |          |   |   |   |                                                                         |
| chr1 Cufflinks exon23878411          | 23878564 | . | - | . | gene_id "XLOC_003094"; transcript_id "TCONS_00005272"; exon_number "4"; |
| oId "CUFF.1153.6"; tss_id "TSS3873"; |          |   |   |   |                                                                         |
| chr1 Cufflinks exon23880963          | 23881411 | . | - | . | gene_id "XLOC_003094"; transcript_id "TCONS_00005272"; exon_number "5"; |
| oId "CUFF.1153.6"; tss_id "TSS3873"; |          |   |   |   |                                                                         |
| chr1 Cufflinks exon23874667          | 23875934 | . | - | . | gene_id "XLOC_003094"; transcript_id "TCONS_00005273"; exon_number "1"; |
| oId "CUFF.1153.4"; tss_id "TSS3873"; |          |   |   |   |                                                                         |
| chr1 Cufflinks exon23878112          | 23878207 | . | - | . | gene_id "XLOC_003094"; transcript_id "TCONS_00005273"; exon_number "2"; |
| oId "CUFF.1153.4"; tss_id "TSS3873"; |          |   |   |   |                                                                         |
| chr1 Cufflinks exon23878414          | 23881432 | . | - | . | gene_id "XLOC_003094"; transcript_id "TCONS_00005273"; exon_number "3"; |
| oId "CUFF.1153.4"; tss_id "TSS3873"; |          |   |   |   |                                                                         |
| chr1 Cufflinks exon23939960          | 23941826 | . | - | . | gene_id "XLOC_003098"; transcript_id "TCONS_00005277"; exon_number "1"; |
| oId "CUFF.1161.3"; tss_id "TSS3877"; |          |   |   |   |                                                                         |
| chr1 Cufflinks exon23945104          | 23945886 | . | - | . | gene_id "XLOC_003098"; transcript_id "TCONS_00005277"; exon_number "2"; |
| oId "CUFF.1161.3"; tss_id "TSS3877"; |          |   |   |   |                                                                         |
| chr1 Cufflinks exon23939960          | 23941826 | . | - | . | gene_id "XLOC_003098"; transcript_id "TCONS_00005278"; exon_number "1"; |
| oId "CUFF.1161.4"; tss_id "TSS3878"; |          |   |   |   |                                                                         |
| chr1 Cufflinks exon23945166          | 23946291 | . | - | . | gene_id "XLOC_003098"; transcript_id "TCONS_00005278"; exon_number "2"; |
| oId "CUFF.1161.4"; tss_id "TSS3878"; |          |   |   |   |                                                                         |
| chr1 Cufflinks exon23939960          | 23941826 | . | - | . | gene_id "XLOC_003098"; transcript_id "TCONS_00005279"; exon_number "1"; |

oId "CUFF.1161.1"; tss\_id "TSS3878";  
chr1 Cufflinks exon23946315 23946328 . - . gene\_id "XLOC\_003098"; transcript\_id "TCONS\_00005279"; exon\_number "2";  
oId "CUFF.1161.1"; tss\_id "TSS3878";  
chr1 Cufflinks exon25188466 25188962 . - . gene\_id "XLOC\_003115"; transcript\_id "TCONS\_00005316"; exon\_number "1";  
oId "CUFF.1251.2"; tss\_id "TSS3903";  
chr1 Cufflinks exon25191827 25192102 . - . gene\_id "XLOC\_003115"; transcript\_id "TCONS\_00005316"; exon\_number "2";  
oId "CUFF.1251.2"; tss\_id "TSS3903";  
chr1 Cufflinks exon25193470 25193600 . - . gene\_id "XLOC\_003115"; transcript\_id "TCONS\_00005316"; exon\_number "3";  
oId "CUFF.1251.2"; tss\_id "TSS3903";  
chr1 Cufflinks exon25194517 25194609 . - . gene\_id "XLOC\_003115"; transcript\_id "TCONS\_00005316"; exon\_number "4";  
oId "CUFF.1251.2"; tss\_id "TSS3903";  
chr1 Cufflinks exon25197457 25197605 . - . gene\_id "XLOC\_003115"; transcript\_id "TCONS\_00005316"; exon\_number "5";  
oId "CUFF.1251.2"; tss\_id "TSS3903";  
chr1 Cufflinks exon25192791 25193324 . - . gene\_id "XLOC\_003115"; transcript\_id "TCONS\_00005318"; exon\_number "1";  
oId "CUFF.1251.4"; tss\_id "TSS3903";  
chr1 Cufflinks exon25193471 25193600 . - . gene\_id "XLOC\_003115"; transcript\_id "TCONS\_00005318"; exon\_number "2";  
oId "CUFF.1251.4"; tss\_id "TSS3903";  
chr1 Cufflinks exon25194517 25194609 . - . gene\_id "XLOC\_003115"; transcript\_id "TCONS\_00005318"; exon\_number "3";  
oId "CUFF.1251.4"; tss\_id "TSS3903";  
chr1 Cufflinks exon25197457 25197589 . - . gene\_id "XLOC\_003115"; transcript\_id "TCONS\_00005318"; exon\_number "4";  
oId "CUFF.1251.4"; tss\_id "TSS3903";  
chr1 Cufflinks exon25192791 25193323 . - . gene\_id "XLOC\_003115"; transcript\_id "TCONS\_00005319"; exon\_number "1";  
oId "CUFF.1251.3"; tss\_id "TSS3903";  
chr1 Cufflinks exon25193470 25193600 . - . gene\_id "XLOC\_003115"; transcript\_id "TCONS\_00005319"; exon\_number "2";  
oId "CUFF.1251.3"; tss\_id "TSS3903";  
chr1 Cufflinks exon25194517 25194609 . - . gene\_id "XLOC\_003115"; transcript\_id "TCONS\_00005319"; exon\_number "3";  
oId "CUFF.1251.3"; tss\_id "TSS3903";  
chr1 Cufflinks exon25197457 25197605 . - . gene\_id "XLOC\_003115"; transcript\_id "TCONS\_00005319"; exon\_number "4";  
oId "CUFF.1251.3"; tss\_id "TSS3903";  
chr1 Cufflinks exon25619961 25621159 . - . gene\_id "XLOC\_003124"; transcript\_id "TCONS\_00005332"; exon\_number "1";  
oId "CUFF.1282.1"; tss\_id "TSS3914";  
chr1 Cufflinks exon25663531 25664466 . - . gene\_id "XLOC\_003124"; transcript\_id "TCONS\_00005332"; exon\_number "2";  
oId "CUFF.1282.1"; tss\_id "TSS3914";  
chr1 Cufflinks exon25629229 25631312 . - . gene\_id "XLOC\_003124"; transcript\_id "TCONS\_00005336"; exon\_number "1";  
oId "CUFF.1282.6"; tss\_id "TSS3914";  
chr1 Cufflinks exon25663531 25664466 . - . gene\_id "XLOC\_003124"; transcript\_id "TCONS\_00005336"; exon\_number "2";  
oId "CUFF.1282.6"; tss\_id "TSS3914";  
chr1 Cufflinks exon25629229 25631312 . - . gene\_id "XLOC\_003124"; transcript\_id "TCONS\_00005335"; exon\_number "1";  
oId "CUFF.1282.2"; tss\_id "TSS3914";  
chr1 Cufflinks exon25644554 25644762 . - . gene\_id "XLOC\_003124"; transcript\_id "TCONS\_00005335"; exon\_number "2";  
oId "CUFF.1282.2"; tss\_id "TSS3914";  
chr1 Cufflinks exon25663531 25664466 . - . gene\_id "XLOC\_003124"; transcript\_id "TCONS\_00005335"; exon\_number "3";  
oId "CUFF.1282.2"; tss\_id "TSS3914";

|                                      |          |   |   |   |                                                                         |
|--------------------------------------|----------|---|---|---|-------------------------------------------------------------------------|
| chr1 Cufflinks exon25629229          | 25631312 | . | - | . | gene_id "XLOC_003124"; transcript_id "TCONS_00005338"; exon_number "1"; |
| oId "CUFF.1282.3"; tss_id "TSS3917"; |          |   |   |   |                                                                         |
| chr1 Cufflinks exon25633387          | 25633440 | . | - | . | gene_id "XLOC_003124"; transcript_id "TCONS_00005338"; exon_number "2"; |
| oId "CUFF.1282.3"; tss_id "TSS3917"; |          |   |   |   |                                                                         |
| chr1 Cufflinks exon25644554          | 25644762 | . | - | . | gene_id "XLOC_003124"; transcript_id "TCONS_00005338"; exon_number "3"; |
| oId "CUFF.1282.3"; tss_id "TSS3917"; |          |   |   |   |                                                                         |
| chr1 Cufflinks exon25664560          | 25664705 | . | - | . | gene_id "XLOC_003124"; transcript_id "TCONS_00005338"; exon_number "4"; |
| oId "CUFF.1282.3"; tss_id "TSS3917"; |          |   |   |   |                                                                         |
| chr1 Cufflinks exon28905050          | 28905192 | . | - | . | gene_id "XLOC_003190"; transcript_id "TCONS_00005459"; exon_number "1"; |
| oId "CUFF.1541.1"; tss_id "TSS4007"; |          |   |   |   |                                                                         |
| chr1 Cufflinks exon28906045          | 28906099 | . | - | . | gene_id "XLOC_003190"; transcript_id "TCONS_00005459"; exon_number "2"; |
| oId "CUFF.1541.1"; tss_id "TSS4007"; |          |   |   |   |                                                                         |
| chr1 Cufflinks exon28906424          | 28906493 | . | - | . | gene_id "XLOC_003190"; transcript_id "TCONS_00005459"; exon_number "3"; |
| oId "CUFF.1541.1"; tss_id "TSS4007"; |          |   |   |   |                                                                         |
| chr1 Cufflinks exon28907072          | 28907158 | . | - | . | gene_id "XLOC_003190"; transcript_id "TCONS_00005459"; exon_number "4"; |
| oId "CUFF.1541.1"; tss_id "TSS4007"; |          |   |   |   |                                                                         |
| chr1 Cufflinks exon28907623          | 28907741 | . | - | . | gene_id "XLOC_003190"; transcript_id "TCONS_00005459"; exon_number "5"; |
| oId "CUFF.1541.1"; tss_id "TSS4007"; |          |   |   |   |                                                                         |
| chr1 Cufflinks exon28908102          | 28908366 | . | - | . | gene_id "XLOC_003190"; transcript_id "TCONS_00005459"; exon_number "6"; |
| oId "CUFF.1541.1"; tss_id "TSS4007"; |          |   |   |   |                                                                         |
| chr1 Cufflinks exon28905050          | 28905192 | . | - | . | gene_id "XLOC_003190"; transcript_id "TCONS_00005460"; exon_number "1"; |
| oId "CUFF.1541.4"; tss_id "TSS4007"; |          |   |   |   |                                                                         |
| chr1 Cufflinks exon28906045          | 28906493 | . | - | . | gene_id "XLOC_003190"; transcript_id "TCONS_00005460"; exon_number "2"; |
| oId "CUFF.1541.4"; tss_id "TSS4007"; |          |   |   |   |                                                                         |
| chr1 Cufflinks exon28907072          | 28907741 | . | - | . | gene_id "XLOC_003190"; transcript_id "TCONS_00005460"; exon_number "3"; |
| oId "CUFF.1541.4"; tss_id "TSS4007"; |          |   |   |   |                                                                         |
| chr1 Cufflinks exon28908102          | 28908423 | . | - | . | gene_id "XLOC_003190"; transcript_id "TCONS_00005460"; exon_number "4"; |
| oId "CUFF.1541.4"; tss_id "TSS4007"; |          |   |   |   |                                                                         |
| chr1 Cufflinks exon28905050          | 28905192 | . | - | . | gene_id "XLOC_003190"; transcript_id "TCONS_00005461"; exon_number "1"; |
| oId "CUFF.1541.2"; tss_id "TSS4008"; |          |   |   |   |                                                                         |
| chr1 Cufflinks exon28906045          | 28906101 | . | - | . | gene_id "XLOC_003190"; transcript_id "TCONS_00005461"; exon_number "2"; |
| oId "CUFF.1541.2"; tss_id "TSS4008"; |          |   |   |   |                                                                         |
| chr1 Cufflinks exon28906195          | 28906493 | . | - | . | gene_id "XLOC_003190"; transcript_id "TCONS_00005461"; exon_number "3"; |
| oId "CUFF.1541.2"; tss_id "TSS4008"; |          |   |   |   |                                                                         |
| chr1 Cufflinks exon28906937          | 28907741 | . | - | . | gene_id "XLOC_003190"; transcript_id "TCONS_00005461"; exon_number "4"; |
| oId "CUFF.1541.2"; tss_id "TSS4008"; |          |   |   |   |                                                                         |
| chr1 Cufflinks exon28908102          | 28909405 | . | - | . | gene_id "XLOC_003190"; transcript_id "TCONS_00005461"; exon_number "5"; |
| oId "CUFF.1541.2"; tss_id "TSS4008"; |          |   |   |   |                                                                         |
| chr1 Cufflinks exon28905050          | 28905192 | . | - | . | gene_id "XLOC_003190"; transcript_id "TCONS_00005462"; exon_number "1"; |
| oId "CUFF.1541.3"; tss_id "TSS4008"; |          |   |   |   |                                                                         |
| chr1 Cufflinks exon28906045          | 28906493 | . | - | . | gene_id "XLOC_003190"; transcript_id "TCONS_00005462"; exon_number "2"; |
| oId "CUFF.1541.3"; tss_id "TSS4008"; |          |   |   |   |                                                                         |
| chr1 Cufflinks exon28907072          | 28907158 | . | - | . | gene_id "XLOC_003190"; transcript_id "TCONS_00005462"; exon_number "3"; |

|                                       |   |   |   |                                                                         |  |
|---------------------------------------|---|---|---|-------------------------------------------------------------------------|--|
| oId "CUFF.1541.3"; tss_id "TSS4008";  |   |   |   |                                                                         |  |
| chr1 Cufflinks exon28907623 28907741  | . | - | . | gene_id "XLOC_003190"; transcript_id "TCONS_00005462"; exon_number "4"; |  |
| oId "CUFF.1541.3"; tss_id "TSS4008";  |   |   |   |                                                                         |  |
| chr1 Cufflinks exon28908102 28909435  | . | - | . | gene_id "XLOC_003190"; transcript_id "TCONS_00005462"; exon_number "5"; |  |
| oId "CUFF.1541.3"; tss_id "TSS4008";  |   |   |   |                                                                         |  |
| chr1 Cufflinks exon32813963 32814501  | . | - | . | gene_id "XLOC_003228"; transcript_id "TCONS_00005550"; exon_number "1"; |  |
| oId "CUFF.1700.2"; tss_id "TSS4068";  |   |   |   |                                                                         |  |
| chr1 Cufflinks exon32816855 32816890  | . | - | . | gene_id "XLOC_003228"; transcript_id "TCONS_00005550"; exon_number "2"; |  |
| oId "CUFF.1700.2"; tss_id "TSS4068";  |   |   |   |                                                                         |  |
| chr1 Cufflinks exon36138213 36138225  | . | - | . | gene_id "XLOC_003282"; transcript_id "TCONS_00005645"; exon_number "1"; |  |
| oId "CUFF.1873.1"; tss_id "TSS4141";  |   |   |   |                                                                         |  |
| chr1 Cufflinks exon36194537 36196120  | . | - | . | gene_id "XLOC_003282"; transcript_id "TCONS_00005645"; exon_number "2"; |  |
| oId "CUFF.1873.1"; tss_id "TSS4141";  |   |   |   |                                                                         |  |
| chr1 Cufflinks exon37920480 37921513  | . | - | . | gene_id "XLOC_003304"; transcript_id "TCONS_00005682"; exon_number "1"; |  |
| oId "CUFF.1969.2"; tss_id "TSS4170";  |   |   |   |                                                                         |  |
| chr1 Cufflinks exon37921968 37922060  | . | - | . | gene_id "XLOC_003304"; transcript_id "TCONS_00005682"; exon_number "2"; |  |
| oId "CUFF.1969.2"; tss_id "TSS4170";  |   |   |   |                                                                         |  |
| chr1 Cufflinks exon37939745 37940044  | . | - | . | gene_id "XLOC_003304"; transcript_id "TCONS_00005682"; exon_number "3"; |  |
| oId "CUFF.1969.2"; tss_id "TSS4170";  |   |   |   |                                                                         |  |
| chr1 Cufflinks exon37920480 37921513  | . | - | . | gene_id "XLOC_003304"; transcript_id "TCONS_00005681"; exon_number "1"; |  |
| oId "CUFF.1969.1"; tss_id "TSS4170";  |   |   |   |                                                                         |  |
| chr1 Cufflinks exon37921968 37922060  | . | - | . | gene_id "XLOC_003304"; transcript_id "TCONS_00005681"; exon_number "2"; |  |
| oId "CUFF.1969.1"; tss_id "TSS4170";  |   |   |   |                                                                         |  |
| chr1 Cufflinks exon37939765 37940044  | . | - | . | gene_id "XLOC_003304"; transcript_id "TCONS_00005681"; exon_number "3"; |  |
| oId "CUFF.1969.1"; tss_id "TSS4170";  |   |   |   |                                                                         |  |
| chr1 Cufflinks exon44411223 44411615  | . | - | . | gene_id "XLOC_003393"; transcript_id "TCONS_00005852"; exon_number "1"; |  |
| oId "CUFF.2351.5"; tss_id "TSS4299";  |   |   |   |                                                                         |  |
| chr1 Cufflinks exon44411916 44412318  | . | - | . | gene_id "XLOC_003393"; transcript_id "TCONS_00005852"; exon_number "2"; |  |
| oId "CUFF.2351.5"; tss_id "TSS4299";  |   |   |   |                                                                         |  |
| chr1 Cufflinks exon47846468 47846815  | . | - | . | gene_id "XLOC_003448"; transcript_id "TCONS_00005964"; exon_number "1"; |  |
| oId "CUFF.2567.1"; tss_id "TSS4381";  |   |   |   |                                                                         |  |
| chr1 Cufflinks exon47851920 47852028  | . | - | . | gene_id "XLOC_003448"; transcript_id "TCONS_00005964"; exon_number "2"; |  |
| oId "CUFF.2567.1"; tss_id "TSS4381";  |   |   |   |                                                                         |  |
| chr1 Cufflinks exon47873992 47874147  | . | - | . | gene_id "XLOC_003448"; transcript_id "TCONS_00005964"; exon_number "3"; |  |
| oId "CUFF.2567.1"; tss_id "TSS4381";  |   |   |   |                                                                         |  |
| chr1 Cufflinks exon47875354 47875573  | . | - | . | gene_id "XLOC_003448"; transcript_id "TCONS_00005964"; exon_number "4"; |  |
| oId "CUFF.2567.1"; tss_id "TSS4381";  |   |   |   |                                                                         |  |
| chr1 Cufflinks exon47902962 47902989  | . | - | . | gene_id "XLOC_003448"; transcript_id "TCONS_00005964"; exon_number "5"; |  |
| oId "CUFF.2567.1"; tss_id "TSS4381";  |   |   |   |                                                                         |  |
| chr1 Cufflinks exon54374943 54378291  | . | - | . | gene_id "XLOC_003509"; transcript_id "TCONS_00006088"; exon_number "1"; |  |
| oId "CUFF.2747.10"; tss_id "TSS4469"; |   |   |   |                                                                         |  |
| chr1 Cufflinks exon54382452 54382787  | . | - | . | gene_id "XLOC_003509"; transcript_id "TCONS_00006088"; exon_number "2"; |  |
| oId "CUFF.2747.10"; tss_id "TSS4469"; |   |   |   |                                                                         |  |

|                                                       |          |   |   |   |                                                                         |
|-------------------------------------------------------|----------|---|---|---|-------------------------------------------------------------------------|
| chr1 Cufflinks exon63786555                           | 63786861 | . | - | . | gene_id "XLOC_003604"; transcript_id "TCONS_00006244"; exon_number "1"; |
| oId "CUFF.3044.2"; tss_id "TSS4592";                  |          |   |   |   |                                                                         |
| chr1 Cufflinks exon63787038                           | 63787134 | . | - | . | gene_id "XLOC_003604"; transcript_id "TCONS_00006244"; exon_number "2"; |
| oId "CUFF.3044.2"; tss_id "TSS4592";                  |          |   |   |   |                                                                         |
| chr1 Cufflinks exon63787336                           | 63787751 | . | - | . | gene_id "XLOC_003604"; transcript_id "TCONS_00006244"; exon_number "3"; |
| oId "CUFF.3044.2"; tss_id "TSS4592";                  |          |   |   |   |                                                                         |
| chr1 Cufflinks exon63787987                           | 63788129 | . | - | . | gene_id "XLOC_003604"; transcript_id "TCONS_00006244"; exon_number "4"; |
| oId "CUFF.3044.2"; tss_id "TSS4592";                  |          |   |   |   |                                                                         |
| chr1 Cufflinks exon63786555                           | 63786861 | . | - | . | gene_id "XLOC_003604"; transcript_id "TCONS_00006243"; exon_number "1"; |
| oId "CUFF.3044.1"; tss_id "TSS4592";                  |          |   |   |   |                                                                         |
| chr1 Cufflinks exon63787038                           | 63787134 | . | - | . | gene_id "XLOC_003604"; transcript_id "TCONS_00006243"; exon_number "2"; |
| oId "CUFF.3044.1"; tss_id "TSS4592";                  |          |   |   |   |                                                                         |
| chr1 Cufflinks exon63787987                           | 63788129 | . | - | . | gene_id "XLOC_003604"; transcript_id "TCONS_00006243"; exon_number "3"; |
| oId "CUFF.3044.1"; tss_id "TSS4592";                  |          |   |   |   |                                                                         |
| chr1 Cufflinks exon63786555                           | 63786861 | . | - | . | gene_id "XLOC_003604"; transcript_id "TCONS_00006245"; exon_number "1"; |
| oId "CUFF.3044.3"; tss_id "TSS4593";                  |          |   |   |   |                                                                         |
| chr1 Cufflinks exon63787038                           | 63787134 | . | - | . | gene_id "XLOC_003604"; transcript_id "TCONS_00006245"; exon_number "2"; |
| oId "CUFF.3044.3"; tss_id "TSS4593";                  |          |   |   |   |                                                                         |
| chr1 Cufflinks exon63789162                           | 63789346 | . | - | . | gene_id "XLOC_003604"; transcript_id "TCONS_00006245"; exon_number "3"; |
| oId "CUFF.3044.3"; tss_id "TSS4593";                  |          |   |   |   |                                                                         |
| chr1 Cufflinks exon63786555                           | 63786861 | . | - | . | gene_id "XLOC_003604"; transcript_id "TCONS_00006246"; exon_number "1"; |
| oId "CUFF.3044.4"; tss_id "TSS4593";                  |          |   |   |   |                                                                         |
| chr1 Cufflinks exon63787038                           | 63787134 | . | - | . | gene_id "XLOC_003604"; transcript_id "TCONS_00006246"; exon_number "2"; |
| oId "CUFF.3044.4"; tss_id "TSS4593";                  |          |   |   |   |                                                                         |
| chr1 Cufflinks exon63788719                           | 63788831 | . | - | . | gene_id "XLOC_003604"; transcript_id "TCONS_00006246"; exon_number "3"; |
| oId "CUFF.3044.4"; tss_id "TSS4593";                  |          |   |   |   |                                                                         |
| chr1 Cufflinks exon63789162                           | 63789425 | . | - | . | gene_id "XLOC_003604"; transcript_id "TCONS_00006246"; exon_number "4"; |
| oId "CUFF.3044.4"; tss_id "TSS4593";                  |          |   |   |   |                                                                         |
| chr1 Cufflinks exon 63786555                          | 63786861 | . | - | . | gene_id "XLOC_003604"; transcript_id "TCONS_00006247";                  |
| exon_number "1"; oId "CUFF.3044.5"; tss_id "TSS4594"; |          |   |   |   |                                                                         |
| chr1 Cufflinks exon 63787038                          | 63787134 | . | - | . | gene_id "XLOC_003604"; transcript_id "TCONS_00006247";                  |
| exon_number "2"; oId "CUFF.3044.5"; tss_id "TSS4594"; |          |   |   |   |                                                                         |
| chr1 Cufflinks exon 63790026                          | 63790112 | . | - | . | gene_id "XLOC_003604"; transcript_id "TCONS_00006247";                  |
| exon_number "3"; oId "CUFF.3044.5"; tss_id "TSS4594"; |          |   |   |   |                                                                         |
| chr1 Cufflinks exon 73584343                          | 73584374 | . | - | . | gene_id "XLOC_003667"; transcript_id "TCONS_00006332";                  |
| exon_number "1"; oId "CUFF.3281.1"; tss_id "TSS4664"; |          |   |   |   |                                                                         |
| chr1 Cufflinks exon 73808128                          | 73808202 | . | - | . | gene_id "XLOC_003667"; transcript_id "TCONS_00006332";                  |
| exon_number "2"; oId "CUFF.3281.1"; tss_id "TSS4664"; |          |   |   |   |                                                                         |
| chr1 Cufflinks exon 73832570                          | 73832880 | . | - | . | gene_id "XLOC_003667"; transcript_id "TCONS_00006332";                  |
| exon_number "3"; oId "CUFF.3281.1"; tss_id "TSS4664"; |          |   |   |   |                                                                         |
| chr1 Cufflinks exon 73622164                          | 73622358 | . | - | . | gene_id "XLOC_003667"; transcript_id "TCONS_00006333";                  |
| exon_number "1"; oId "CUFF.3281.2"; tss_id "TSS4664"; |          |   |   |   |                                                                         |
| chr1 Cufflinks exon 73808128                          | 73808202 | . | - | . | gene_id "XLOC_003667"; transcript_id "TCONS_00006333";                  |

exon\_number "2"; oId "CUFF.3281.2"; tss\_id "TSS4664";  
 chr1 Cufflinks exon 73832570 73832880 . - . gene\_id "XLOC\_003667"; transcript\_id "TCONS\_00006333";  
 exon\_number "3"; oId "CUFF.3281.2"; tss\_id "TSS4664";  
 chr1 Cufflinks exon 90090408 90090764 . - . gene\_id "XLOC\_003830"; transcript\_id "TCONS\_00006568";  
 exon\_number "1"; oId "CUFF.3756.1"; tss\_id "TSS4845";  
 chr1 Cufflinks exon 90097575 90097768 . - . gene\_id "XLOC\_003830"; transcript\_id "TCONS\_00006568";  
 exon\_number "2"; oId "CUFF.3756.1"; tss\_id "TSS4845";  
 chr1 Cufflinks exon 90098216 90098453 . - . gene\_id "XLOC\_003830"; transcript\_id "TCONS\_00006568";  
 exon\_number "3"; oId "CUFF.3756.1"; tss\_id "TSS4845";  
 chr1 Cufflinks exon 90091579 90097768 . - . gene\_id "XLOC\_003830"; transcript\_id "TCONS\_00006569";  
 exon\_number "1"; oId "CUFF.3756.2"; tss\_id "TSS4846";  
 chr1 Cufflinks exon 90098216 90099487 . - . gene\_id "XLOC\_003830"; transcript\_id "TCONS\_00006569";  
 exon\_number "2"; oId "CUFF.3756.2"; tss\_id "TSS4846";  
 chr1 Cufflinks exon 90205195 90205395 . - . gene\_id "XLOC\_003831"; transcript\_id "TCONS\_00006571";  
 exon\_number "1"; oId "CUFF.3764.2"; tss\_id "TSS4848";  
 chr1 Cufflinks exon 90206276 90206650 . - . gene\_id "XLOC\_003831"; transcript\_id "TCONS\_00006571";  
 exon\_number "2"; oId "CUFF.3764.2"; tss\_id "TSS4848";  
 chr1 Cufflinks exon 90978808 90979566 . - . gene\_id "XLOC\_003852"; transcript\_id "TCONS\_00006595";  
 exon\_number "1"; oId "CUFF.3826.1"; tss\_id "TSS4869";  
 chr1 Cufflinks exon 90998925 90999196 . - . gene\_id "XLOC\_003852"; transcript\_id "TCONS\_00006595";  
 exon\_number "2"; oId "CUFF.3826.1"; tss\_id "TSS4869";  
 chr1 Cufflinks exon 91023306 91023682 . - . gene\_id "XLOC\_003852"; transcript\_id "TCONS\_00006595";  
 exon\_number "3"; oId "CUFF.3826.1"; tss\_id "TSS4869";  
 chr1 Cufflinks exon 91248452 91248980 . - . gene\_id "XLOC\_003854"; transcript\_id "TCONS\_00006599";  
 exon\_number "1"; oId "CUFF.3828.2"; tss\_id "TSS4873";  
 chr1 Cufflinks exon 91254955 91255044 . - . gene\_id "XLOC\_003854"; transcript\_id "TCONS\_00006599";  
 exon\_number "2"; oId "CUFF.3828.2"; tss\_id "TSS4873";  
 chr1 Cufflinks exon 91317040 91317195 . - . gene\_id "XLOC\_003854"; transcript\_id "TCONS\_00006599";  
 exon\_number "3"; oId "CUFF.3828.2"; tss\_id "TSS4873";  
 chr1 Cufflinks exon 91248452 91248980 . - . gene\_id "XLOC\_003854"; transcript\_id "TCONS\_00006600";  
 exon\_number "1"; oId "CUFF.3828.1"; tss\_id "TSS4873";  
 chr1 Cufflinks exon 91254955 91255044 . - . gene\_id "XLOC\_003854"; transcript\_id "TCONS\_00006600";  
 exon\_number "2"; oId "CUFF.3828.1"; tss\_id "TSS4873";  
 chr1 Cufflinks exon 91297487 91297753 . - . gene\_id "XLOC\_003854"; transcript\_id "TCONS\_00006600";  
 exon\_number "3"; oId "CUFF.3828.1"; tss\_id "TSS4873";  
 chr1 Cufflinks exon 91317040 91317228 . - . gene\_id "XLOC\_003854"; transcript\_id "TCONS\_00006600";  
 exon\_number "4"; oId "CUFF.3828.1"; tss\_id "TSS4873";  
 chr1 Cufflinks exon 95081975 95082627 . - . gene\_id "XLOC\_003907"; transcript\_id "TCONS\_00006718";  
 exon\_number "1"; oId "CUFF.4052.1"; tss\_id "TSS4954";  
 chr1 Cufflinks exon 95088275 95090168 . - . gene\_id "XLOC\_003907"; transcript\_id "TCONS\_00006718"; exon\_number  
 "2"; oId "CUFF.4052.1"; tss\_id "TSS4954";  
 chr1 Cufflinks exon 95081975 95082627 . - . gene\_id "XLOC\_003907"; transcript\_id "TCONS\_00006719"; exon\_number "1";  
 oId "CUFF.4052.2"; tss\_id "TSS4955";



|                                      |           |   |   |   |                                                                         |
|--------------------------------------|-----------|---|---|---|-------------------------------------------------------------------------|
| chr1 Cufflinks exon95144981          | 95145163  | . | - | . | gene_id "XLOC_003907"; transcript_id "TCONS_00006719"; exon_number "2"; |
| oId "CUFF.4052.2"; tss_id "TSS4955"; |           |   |   |   |                                                                         |
| chr1 Cufflinks exon95285512          | 95285838  | . | - | . | gene_id "XLOC_003907"; transcript_id "TCONS_00006719"; exon_number "3"; |
| oId "CUFF.4052.2"; tss_id "TSS4955"; |           |   |   |   |                                                                         |
| chr1 Cufflinks exon101700429         | 101701437 | . | - | . | gene_id "XLOC_003944"; transcript_id "TCONS_00006789"; exon_number "1"; |
| oId "CUFF.4203.1"; tss_id "TSS5001"; |           |   |   |   |                                                                         |
| chr1 Cufflinks exon101701881         | 101702084 | . | - | . | gene_id "XLOC_003944"; transcript_id "TCONS_00006789"; exon_number "2"; |
| oId "CUFF.4203.1"; tss_id "TSS5001"; |           |   |   |   |                                                                         |
| chr1 Cufflinks exon110751073         | 110751826 | . | - | . | gene_id "XLOC_004002"; transcript_id "TCONS_00006895"; exon_number "1"; |
| oId "CUFF.4471.1"; tss_id "TSS5085"; |           |   |   |   |                                                                         |
| chr1 Cufflinks exon110752233         | 110752609 | . | - | . | gene_id "XLOC_004002"; transcript_id "TCONS_00006895"; exon_number "2"; |
| oId "CUFF.4471.1"; tss_id "TSS5085"; |           |   |   |   |                                                                         |
| chr1 Cufflinks exon110751073         | 110751456 | . | - | . | gene_id "XLOC_004002"; transcript_id "TCONS_00006896"; exon_number "1"; |
| oId "CUFF.4471.2"; tss_id "TSS5086"; |           |   |   |   |                                                                         |
| chr1 Cufflinks exon110751766         | 110751833 | . | - | . | gene_id "XLOC_004002"; transcript_id "TCONS_00006896"; exon_number "2"; |
| oId "CUFF.4471.2"; tss_id "TSS5086"; |           |   |   |   |                                                                         |
| chr1 Cufflinks exon110752240         | 110752773 | . | - | . | gene_id "XLOC_004002"; transcript_id "TCONS_00006896"; exon_number "3"; |
| oId "CUFF.4471.2"; tss_id "TSS5086"; |           |   |   |   |                                                                         |
| chr1 Cufflinks exon110856448         | 110858373 | . | - | . | gene_id "XLOC_004010"; transcript_id "TCONS_00006904"; exon_number "1"; |
| oId "CUFF.4487.2"; tss_id "TSS5094"; |           |   |   |   |                                                                         |
| chr1 Cufflinks exon110861387         | 110861504 | . | - | . | gene_id "XLOC_004010"; transcript_id "TCONS_00006904"; exon_number "2"; |
| oId "CUFF.4487.2"; tss_id "TSS5094"; |           |   |   |   |                                                                         |
| chr1 Cufflinks exon110881619         | 110881795 | . | - | . | gene_id "XLOC_004010"; transcript_id "TCONS_00006904"; exon_number "3"; |
| oId "CUFF.4487.2"; tss_id "TSS5094"; |           |   |   |   |                                                                         |
| chr1 Cufflinks exon110856448         | 110858373 | . | - | . | gene_id "XLOC_004010"; transcript_id "TCONS_00006905"; exon_number "1"; |
| oId "CUFF.4487.3"; tss_id "TSS5094"; |           |   |   |   |                                                                         |
| chr1 Cufflinks exon110861387         | 110861504 | . | - | . | gene_id "XLOC_004010"; transcript_id "TCONS_00006905"; exon_number "2"; |
| oId "CUFF.4487.3"; tss_id "TSS5094"; |           |   |   |   |                                                                         |
| chr1 Cufflinks exon110873656         | 110873768 | . | - | . | gene_id "XLOC_004010"; transcript_id "TCONS_00006905"; exon_number "3"; |
| oId "CUFF.4487.3"; tss_id "TSS5094"; |           |   |   |   |                                                                         |
| chr1 Cufflinks exon110881619         | 110881871 | . | - | . | gene_id "XLOC_004010"; transcript_id "TCONS_00006905"; exon_number "4"; |
| oId "CUFF.4487.3"; tss_id "TSS5094"; |           |   |   |   |                                                                         |
| chr1 Cufflinks exon111396274         | 111396310 | . | - | . | gene_id "XLOC_004019"; transcript_id "TCONS_00006923"; exon_number "1"; |
| oId "CUFF.4521.1"; tss_id "TSS5106"; |           |   |   |   |                                                                         |
| chr1 Cufflinks exon111419699         | 111420307 | . | - | . | gene_id "XLOC_004019"; transcript_id "TCONS_00006923"; exon_number "2"; |
| oId "CUFF.4521.1"; tss_id "TSS5106"; |           |   |   |   |                                                                         |
| chr1 Cufflinks exon111433348         | 111433452 | . | - | . | gene_id "XLOC_004019"; transcript_id "TCONS_00006923"; exon_number "3"; |
| oId "CUFF.4521.1"; tss_id "TSS5106"; |           |   |   |   |                                                                         |
| chr1 Cufflinks exon117028282         | 117038978 | . | - | . | gene_id "XLOC_004105"; transcript_id "TCONS_00007051"; exon_number "1"; |
| oId "CUFF.4806.1"; tss_id "TSS5209"; |           |   |   |   |                                                                         |
| chr1 Cufflinks exon117039429         | 117046963 | . | - | . | gene_id "XLOC_004105"; transcript_id "TCONS_00007051"; exon_number "2"; |
| oId "CUFF.4806.1"; tss_id "TSS5209"; |           |   |   |   |                                                                         |
| chr1 Cufflinks exon117028282         | 117041672 | . | - | . | gene_id "XLOC_004105"; transcript_id "TCONS_00007053"; exon_number "1"; |

oId "CUFF.4806.3"; tss\_id "TSS5210";  
chr1 Cufflinks exon117046993 117047043 . - . gene\_id "XLOC\_004105"; transcript\_id "TCONS\_00007053"; exon\_number "2";  
oId "CUFF.4806.3"; tss\_id "TSS5210";  
chr1 Cufflinks exon117047602 117047715 . - . gene\_id "XLOC\_004105"; transcript\_id "TCONS\_00007053"; exon\_number "3";  
oId "CUFF.4806.3"; tss\_id "TSS5210";  
chr1 Cufflinks exon117567147 117569408 . - . gene\_id "XLOC\_004113"; transcript\_id "TCONS\_00007067"; exon\_number "1";  
oId "CUFF.4821.4"; tss\_id "TSS5221";  
chr1 Cufflinks exon117574736 117574958 . - . gene\_id "XLOC\_004113"; transcript\_id "TCONS\_00007067"; exon\_number "2";  
oId "CUFF.4821.4"; tss\_id "TSS5221";  
chr1 Cufflinks exon117592789 117592956 . - . gene\_id "XLOC\_004113"; transcript\_id "TCONS\_00007067"; exon\_number "3";  
oId "CUFF.4821.4"; tss\_id "TSS5221";  
chr1 Cufflinks exon117601995 117602112 . - . gene\_id "XLOC\_004113"; transcript\_id "TCONS\_00007067"; exon\_number "4";  
oId "CUFF.4821.4"; tss\_id "TSS5221";  
chr1 Cufflinks exon117567147 117569408 . - . gene\_id "XLOC\_004113"; transcript\_id "TCONS\_00007070"; exon\_number "1";  
oId "CUFF.4821.6"; tss\_id "TSS5222";  
chr1 Cufflinks exon117601995 117602654 . - . gene\_id "XLOC\_004113"; transcript\_id "TCONS\_00007070"; exon\_number "2";  
oId "CUFF.4821.6"; tss\_id "TSS5222";  
chr1 Cufflinks exon117567147 117569408 . - . gene\_id "XLOC\_004113"; transcript\_id "TCONS\_00007069"; exon\_number "1";  
oId "CUFF.4821.1"; tss\_id "TSS5222";  
chr1 Cufflinks exon117592789 117592956 . - . gene\_id "XLOC\_004113"; transcript\_id "TCONS\_00007069"; exon\_number "2";  
oId "CUFF.4821.1"; tss\_id "TSS5222";  
chr1 Cufflinks exon117599549 117602654 . - . gene\_id "XLOC\_004113"; transcript\_id "TCONS\_00007069"; exon\_number "3";  
oId "CUFF.4821.1"; tss\_id "TSS5222";  
chr1 Cufflinks exon117599133 117599486 . - . gene\_id "XLOC\_004113"; transcript\_id "TCONS\_00007073"; exon\_number "1";  
oId "CUFF.4821.7"; tss\_id "TSS5222";  
chr1 Cufflinks exon117601995 117602632 . - . gene\_id "XLOC\_004113"; transcript\_id "TCONS\_00007073"; exon\_number "2";  
oId "CUFF.4821.7"; tss\_id "TSS5222";  
chr1 Cufflinks exon117599133 117599486 . - . gene\_id "XLOC\_004113"; transcript\_id "TCONS\_00007074"; exon\_number "1";  
oId "CUFF.4821.8"; tss\_id "TSS5224";  
chr1 Cufflinks exon117602756 117602797 . - . gene\_id "XLOC\_004113"; transcript\_id "TCONS\_00007074"; exon\_number "2";  
oId "CUFF.4821.8"; tss\_id "TSS5224";  
chr1 Cufflinks exon149094603 149096608 . - . gene\_id "XLOC\_004287"; transcript\_id "TCONS\_00007321"; exon\_number "1";  
oId "CUFF.5487.3"; tss\_id "TSS5420";  
chr1 Cufflinks exon149099802 149099859 . - . gene\_id "XLOC\_004287"; transcript\_id "TCONS\_00007321"; exon\_number "2";  
oId "CUFF.5487.3"; tss\_id "TSS5420";  
chr1 Cufflinks exon149101169 149101362 . - . gene\_id "XLOC\_004287"; transcript\_id "TCONS\_00007321"; exon\_number "3";  
oId "CUFF.5487.3"; tss\_id "TSS5420";  
chr1 Cufflinks exon155017668 155018329 . - . gene\_id "XLOC\_004439"; transcript\_id "TCONS\_00007560"; exon\_number "1";  
oId "CUFF.5934.1"; tss\_id "TSS5609";  
chr1 Cufflinks exon155018436 155018722 . - . gene\_id "XLOC\_004439"; transcript\_id "TCONS\_00007560"; exon\_number "2";  
oId "CUFF.5934.1"; tss\_id "TSS5609";  
chr1 Cufflinks exon155021745 155021837 . - . gene\_id "XLOC\_004439"; transcript\_id "TCONS\_00007560"; exon\_number "3";  
oId "CUFF.5934.1"; tss\_id "TSS5609";

chr1 Cufflinks exon155023083 155023641 . - . gene\_id "XLOC\_004439"; transcript\_id "TCONS\_00007560"; exon\_number "4";  
oId "CUFF.5934.1"; tss\_id "TSS5609";

chr1 Cufflinks exon156416010 156416365 . - . gene\_id "XLOC\_004486"; transcript\_id "TCONS\_00007667"; exon\_number "1";  
oId "CUFF.6106.9"; tss\_id "TSS5671";

chr1 Cufflinks exon156426145 156426523 . - . gene\_id "XLOC\_004486"; transcript\_id "TCONS\_00007667"; exon\_number "2";  
oId "CUFF.6106.9"; tss\_id "TSS5671";

chr1 Cufflinks exon156416010 156416365 . - . gene\_id "XLOC\_004486"; transcript\_id "TCONS\_00007668"; exon\_number "1";  
oId "CUFF.6106.8"; tss\_id "TSS5670";

chr1 Cufflinks exon156425420 156425513 . - . gene\_id "XLOC\_004486"; transcript\_id "TCONS\_00007668"; exon\_number "2";  
oId "CUFF.6106.8"; tss\_id "TSS5670";

chr1 Cufflinks exon156426145 156427017 . - . gene\_id "XLOC\_004486"; transcript\_id "TCONS\_00007668"; exon\_number "3";  
oId "CUFF.6106.8"; tss\_id "TSS5670";

chr1 Cufflinks exon156422302 156423044 . - . gene\_id "XLOC\_004486"; transcript\_id "TCONS\_00007669"; exon\_number "1";  
oId "CUFF.6106.11"; tss\_id "TSS5670";

chr1 Cufflinks exon156425420 156425513 . - . gene\_id "XLOC\_004486"; transcript\_id "TCONS\_00007669"; exon\_number "2";  
oId "CUFF.6106.11"; tss\_id "TSS5670";

chr1 Cufflinks exon156426145 156427017 . - . gene\_id "XLOC\_004486"; transcript\_id "TCONS\_00007669"; exon\_number "3";  
oId "CUFF.6106.11"; tss\_id "TSS5670";

chr1 Cufflinks exon156423979 156424587 . - . gene\_id "XLOC\_004486"; transcript\_id "TCONS\_00007670"; exon\_number "1";  
oId "CUFF.6106.12"; tss\_id "TSS5671";

chr1 Cufflinks exon156426145 156426523 . - . gene\_id "XLOC\_004486"; transcript\_id "TCONS\_00007670"; exon\_number "2";  
oId "CUFF.6106.12"; tss\_id "TSS5671";

chr1 Cufflinks exon156607506 156615918 . - . gene\_id "XLOC\_004502"; transcript\_id "TCONS\_00007692"; exon\_number "1";  
oId "CUFF.6135.1"; tss\_id "TSS5697";

chr1 Cufflinks exon156616685 156616945 . - . gene\_id "XLOC\_004502"; transcript\_id "TCONS\_00007692"; exon\_number "2";  
oId "CUFF.6135.1"; tss\_id "TSS5697";

chr1 Cufflinks exon156607506 156615918 . - . gene\_id "XLOC\_004502"; transcript\_id "TCONS\_00007693"; exon\_number "1";  
oId "CUFF.6135.2"; tss\_id "TSS5698";

chr1 Cufflinks exon156616814 156616946 . - . gene\_id "XLOC\_004502"; transcript\_id "TCONS\_00007693"; exon\_number "2";  
oId "CUFF.6135.2"; tss\_id "TSS5698";

chr1 Cufflinks exon156631107 156631309 . - . gene\_id "XLOC\_004502"; transcript\_id "TCONS\_00007693"; exon\_number "3";  
oId "CUFF.6135.2"; tss\_id "TSS5698";

chr1 Cufflinks exon156676728 156680695 . - . gene\_id "XLOC\_004504"; transcript\_id "TCONS\_00007703"; exon\_number "1";  
oId "CUFF.6137.9"; tss\_id "TSS5703";

chr1 Cufflinks exon156682004 156682139 . - . gene\_id "XLOC\_004504"; transcript\_id "TCONS\_00007703"; exon\_number "2";  
oId "CUFF.6137.9"; tss\_id "TSS5703";

chr1 Cufflinks exon156682670 156682831 . - . gene\_id "XLOC\_004504"; transcript\_id "TCONS\_00007703"; exon\_number "3";  
oId "CUFF.6137.9"; tss\_id "TSS5703";

chr1 Cufflinks exon156676728 156680695 . - . gene\_id "XLOC\_004504"; transcript\_id "TCONS\_00007704"; exon\_number "1";  
oId "CUFF.6137.8"; tss\_id "TSS5704";

chr1 Cufflinks exon156681103 156681199 . - . gene\_id "XLOC\_004504"; transcript\_id "TCONS\_00007704"; exon\_number "2";  
oId "CUFF.6137.8"; tss\_id "TSS5704";

chr1 Cufflinks exon156682004 156682139 . - . gene\_id "XLOC\_004504"; transcript\_id "TCONS\_00007704"; exon\_number "3";

|                                        |   |   |   |                                                                         |  |
|----------------------------------------|---|---|---|-------------------------------------------------------------------------|--|
| oId "CUFF.6137.8"; tss_id "TSS5704";   |   |   |   |                                                                         |  |
| chr1 Cufflinks exon156682670 156682769 | . | - | . | gene_id "XLOC_004504"; transcript_id "TCONS_00007704"; exon_number "4"; |  |
| oId "CUFF.6137.8"; tss_id "TSS5704";   |   |   |   |                                                                         |  |
| chr1 Cufflinks exon156682914 156682942 | . | - | . | gene_id "XLOC_004504"; transcript_id "TCONS_00007704"; exon_number "5"; |  |
| oId "CUFF.6137.8"; tss_id "TSS5704";   |   |   |   |                                                                         |  |
| chr1 Cufflinks exon158443867 158444457 | . | - | . | gene_id "XLOC_004536"; transcript_id "TCONS_00007779"; exon_number "1"; |  |
| oId "CUFF.6261.6"; tss_id "TSS5754";   |   |   |   |                                                                         |  |
| chr1 Cufflinks exon158464192 158464344 | . | - | . | gene_id "XLOC_004536"; transcript_id "TCONS_00007779"; exon_number "2"; |  |
| oId "CUFF.6261.6"; tss_id "TSS5754";   |   |   |   |                                                                         |  |
| chr1 Cufflinks exon158464445 158464566 | . | - | . | gene_id "XLOC_004536"; transcript_id "TCONS_00007779"; exon_number "3"; |  |
| oId "CUFF.6261.6"; tss_id "TSS5754";   |   |   |   |                                                                         |  |
| chr1 Cufflinks exon158443867 158444457 | . | - | . | gene_id "XLOC_004536"; transcript_id "TCONS_00007780"; exon_number "1"; |  |
| oId "CUFF.6261.5"; tss_id "TSS5753";   |   |   |   |                                                                         |  |
| chr1 Cufflinks exon158464192 158464344 | . | - | . | gene_id "XLOC_004536"; transcript_id "TCONS_00007780"; exon_number "2"; |  |
| oId "CUFF.6261.5"; tss_id "TSS5753";   |   |   |   |                                                                         |  |
| chr1 Cufflinks exon158464571 158464817 | . | - | . | gene_id "XLOC_004536"; transcript_id "TCONS_00007780"; exon_number "3"; |  |
| oId "CUFF.6261.5"; tss_id "TSS5753";   |   |   |   |                                                                         |  |
| chr1 Cufflinks exon158443867 158444457 | . | - | . | gene_id "XLOC_004536"; transcript_id "TCONS_00007782"; exon_number "1"; |  |
| oId "CUFF.6261.4"; tss_id "TSS5753";   |   |   |   |                                                                         |  |
| chr1 Cufflinks exon158464192 158464344 | . | - | . | gene_id "XLOC_004536"; transcript_id "TCONS_00007782"; exon_number "2"; |  |
| oId "CUFF.6261.4"; tss_id "TSS5753";   |   |   |   |                                                                         |  |
| chr1 Cufflinks exon158464858 158464912 | . | - | . | gene_id "XLOC_004536"; transcript_id "TCONS_00007782"; exon_number "3"; |  |
| oId "CUFF.6261.4"; tss_id "TSS5753";   |   |   |   |                                                                         |  |
| chr1 Cufflinks exon173386724 173387761 | . | - | . | gene_id "XLOC_004731"; transcript_id "TCONS_00008106"; exon_number "1"; |  |
| oId "CUFF.6880.9"; tss_id "TSS5997";   |   |   |   |                                                                         |  |
| chr1 Cufflinks exon173409602 173409889 | . | - | . | gene_id "XLOC_004731"; transcript_id "TCONS_00008106"; exon_number "2"; |  |
| oId "CUFF.6880.9"; tss_id "TSS5997";   |   |   |   |                                                                         |  |
| chr1 Cufflinks exon173411058 173411180 | . | - | . | gene_id "XLOC_004731"; transcript_id "TCONS_00008106"; exon_number "3"; |  |
| oId "CUFF.6880.9"; tss_id "TSS5997";   |   |   |   |                                                                         |  |
| chr1 Cufflinks exon173386724 173387761 | . | - | . | gene_id "XLOC_004731"; transcript_id "TCONS_00008107"; exon_number "1"; |  |
| oId "CUFF.6880.8"; tss_id "TSS5998";   |   |   |   |                                                                         |  |
| chr1 Cufflinks exon173411058 173411153 | . | - | . | gene_id "XLOC_004731"; transcript_id "TCONS_00008107"; exon_number "2"; |  |
| oId "CUFF.6880.8"; tss_id "TSS5998";   |   |   |   |                                                                         |  |
| chr1 Cufflinks exon173431463 173431593 | . | - | . | gene_id "XLOC_004731"; transcript_id "TCONS_00008107"; exon_number "3"; |  |
| oId "CUFF.6880.8"; tss_id "TSS5998";   |   |   |   |                                                                         |  |
| chr1 Cufflinks exon173445771 173446309 | . | - | . | gene_id "XLOC_004731"; transcript_id "TCONS_00008107"; exon_number "4"; |  |
| oId "CUFF.6880.8"; tss_id "TSS5998";   |   |   |   |                                                                         |  |
| chr1 Cufflinks exon173407247 173409889 | . | - | . | gene_id "XLOC_004731"; transcript_id "TCONS_00008109"; exon_number "1"; |  |
| oId "CUFF.6880.10"; tss_id "TSS5998";  |   |   |   |                                                                         |  |
| chr1 Cufflinks exon173411058 173411153 | . | - | . | gene_id "XLOC_004731"; transcript_id "TCONS_00008109"; exon_number "2"; |  |
| oId "CUFF.6880.10"; tss_id "TSS5998";  |   |   |   |                                                                         |  |
| chr1 Cufflinks exon173431463 173431593 | . | - | . | gene_id "XLOC_004731"; transcript_id "TCONS_00008109"; exon_number "3"; |  |
| oId "CUFF.6880.10"; tss_id "TSS5998";  |   |   |   |                                                                         |  |

chr1 Cufflinks exon173445771 173446309 . - . gene\_id "XLOC\_004731"; transcript\_id "TCONS\_00008109"; exon\_number "4";  
oId "CUFF.6880.10"; tss\_id "TSS5998";  
chr1 Cufflinks exon173833039 173833213 . - . gene\_id "XLOC\_004739"; transcript\_id "TCONS\_00008120"; exon\_number "1";  
oId "CUFF.6921.3"; tss\_id "TSS6008";  
chr1 Cufflinks exon173833395 173834291 . - . gene\_id "XLOC\_004739"; transcript\_id "TCONS\_00008120"; exon\_number "2";  
oId "CUFF.6921.3"; tss\_id "TSS6008";  
chr1 Cufflinks exon173833039 173833213 . - . gene\_id "XLOC\_004739"; transcript\_id "TCONS\_00008122"; exon\_number "1";  
oId "CUFF.6921.2"; tss\_id "TSS6009";  
chr1 Cufflinks exon173833395 173833442 . - . gene\_id "XLOC\_004739"; transcript\_id "TCONS\_00008122"; exon\_number "2";  
oId "CUFF.6921.2"; tss\_id "TSS6009";  
chr1 Cufflinks exon173833622 173833644 . - . gene\_id "XLOC\_004739"; transcript\_id "TCONS\_00008122"; exon\_number "3";  
oId "CUFF.6921.2"; tss\_id "TSS6009";  
chr1 Cufflinks exon173833813 173833842 . - . gene\_id "XLOC\_004739"; transcript\_id "TCONS\_00008122"; exon\_number "4";  
oId "CUFF.6921.2"; tss\_id "TSS6009";  
chr1 Cufflinks exon173834367 173834420 . - . gene\_id "XLOC\_004739"; transcript\_id "TCONS\_00008122"; exon\_number "5";  
oId "CUFF.6921.2"; tss\_id "TSS6009";  
chr1 Cufflinks exon173834648 173834685 . - . gene\_id "XLOC\_004739"; transcript\_id "TCONS\_00008122"; exon\_number "6";  
oId "CUFF.6921.2"; tss\_id "TSS6009";  
chr1 Cufflinks exon173834995 173835032 . - . gene\_id "XLOC\_004739"; transcript\_id "TCONS\_00008122"; exon\_number "7";  
oId "CUFF.6921.2"; tss\_id "TSS6009";  
chr1 Cufflinks exon173835315 173835344 . - . gene\_id "XLOC\_004739"; transcript\_id "TCONS\_00008122"; exon\_number "8";  
oId "CUFF.6921.2"; tss\_id "TSS6009";  
chr1 Cufflinks exon173835666 173835705 . - . gene\_id "XLOC\_004739"; transcript\_id "TCONS\_00008122"; exon\_number "9";  
oId "CUFF.6921.2"; tss\_id "TSS6009";  
chr1 Cufflinks exon173835899 173835934 . - . gene\_id "XLOC\_004739"; transcript\_id "TCONS\_00008122"; exon\_number "10";  
oId "CUFF.6921.2"; tss\_id "TSS6009";  
chr1 Cufflinks exon173836129 173836181 . - . gene\_id "XLOC\_004739"; transcript\_id "TCONS\_00008122"; exon\_number "11";  
oId "CUFF.6921.2"; tss\_id "TSS6009";  
chr1 Cufflinks exon173837098 173837125 . - . gene\_id "XLOC\_004739"; transcript\_id "TCONS\_00008122"; exon\_number "12";  
oId "CUFF.6921.2"; tss\_id "TSS6009";  
chr1 Cufflinks exon173833039 173833213 . - . gene\_id "XLOC\_004739"; transcript\_id "TCONS\_00008121"; exon\_number "1";  
oId "CUFF.6921.1"; tss\_id "TSS6009";  
chr1 Cufflinks exon173833395 173833442 . - . gene\_id "XLOC\_004739"; transcript\_id "TCONS\_00008121"; exon\_number "2";  
oId "CUFF.6921.1"; tss\_id "TSS6009";  
chr1 Cufflinks exon173833622 173833644 . - . gene\_id "XLOC\_004739"; transcript\_id "TCONS\_00008121"; exon\_number "3";  
oId "CUFF.6921.1"; tss\_id "TSS6009";  
chr1 Cufflinks exon173833813 173833842 . - . gene\_id "XLOC\_004739"; transcript\_id "TCONS\_00008121"; exon\_number "4";  
oId "CUFF.6921.1"; tss\_id "TSS6009";  
chr1 Cufflinks exon173834367 173834420 . - . gene\_id "XLOC\_004739"; transcript\_id "TCONS\_00008121"; exon\_number "5";  
oId "CUFF.6921.1"; tss\_id "TSS6009";  
chr1 Cufflinks exon173834609 173834685 . - . gene\_id "XLOC\_004739"; transcript\_id "TCONS\_00008121"; exon\_number "6";  
oId "CUFF.6921.1"; tss\_id "TSS6009";  
chr1 Cufflinks exon173834995 173835032 . - . gene\_id "XLOC\_004739"; transcript\_id "TCONS\_00008121"; exon\_number "7";

oId "CUFF.6921.1"; tss\_id "TSS6009";  
chr1 Cufflinks exon173835315 173835344 . - . gene\_id "XLOC\_004739"; transcript\_id "TCONS\_00008121"; exon\_number "8";  
oId "CUFF.6921.1"; tss\_id "TSS6009";  
chr1 Cufflinks exon173835666 173835705 . - . gene\_id "XLOC\_004739"; transcript\_id "TCONS\_00008121"; exon\_number "9";  
oId "CUFF.6921.1"; tss\_id "TSS6009";  
chr1 Cufflinks exon173835899 173835934 . - . gene\_id "XLOC\_004739"; transcript\_id "TCONS\_00008121"; exon\_number "10";  
oId "CUFF.6921.1"; tss\_id "TSS6009";  
chr1 Cufflinks exon173836129 173836181 . - . gene\_id "XLOC\_004739"; transcript\_id "TCONS\_00008121"; exon\_number "11";  
oId "CUFF.6921.1"; tss\_id "TSS6009";  
chr1 Cufflinks exon173837098 173837125 . - . gene\_id "XLOC\_004739"; transcript\_id "TCONS\_00008121"; exon\_number "12";  
oId "CUFF.6921.1"; tss\_id "TSS6009";  
chr1 Cufflinks exon175873940 175874272 . - . gene\_id "XLOC\_004752"; transcript\_id "TCONS\_00008145"; exon\_number "1";  
oId "CUFF.6964.2"; tss\_id "TSS6026";  
chr1 Cufflinks exon175877683 175877906 . - . gene\_id "XLOC\_004752"; transcript\_id "TCONS\_00008145"; exon\_number "2";  
oId "CUFF.6964.2"; tss\_id "TSS6026";  
chr1 Cufflinks exon175889592 175890069 . - . gene\_id "XLOC\_004752"; transcript\_id "TCONS\_00008145"; exon\_number "3";  
oId "CUFF.6964.2"; tss\_id "TSS6026";  
chr1 Cufflinks exon198777132 198777372 . - . gene\_id "XLOC\_004851"; transcript\_id "TCONS\_00008310"; exon\_number "1";  
oId "CUFF.7541.1"; tss\_id "TSS6148";  
chr1 Cufflinks exon198869540 198869698 . - . gene\_id "XLOC\_004851"; transcript\_id "TCONS\_00008310"; exon\_number "2";  
oId "CUFF.7541.1"; tss\_id "TSS6148";  
chr1 Cufflinks exon198906355 198906445 . - . gene\_id "XLOC\_004851"; transcript\_id "TCONS\_00008310"; exon\_number "3";  
oId "CUFF.7541.1"; tss\_id "TSS6148";  
chr1 Cufflinks exon198989947 198990117 . - . gene\_id "XLOC\_004851"; transcript\_id "TCONS\_00008310"; exon\_number "4";  
oId "CUFF.7541.1"; tss\_id "TSS6148";  
chr1 Cufflinks exon198811243 198817951 . - . gene\_id "XLOC\_004851"; transcript\_id "TCONS\_00008313"; exon\_number "1";  
oId "CUFF.7541.3"; tss\_id "TSS6149";  
chr1 Cufflinks exon198820267 198828243 . - . gene\_id "XLOC\_004851"; transcript\_id "TCONS\_00008313"; exon\_number "2";  
oId "CUFF.7541.3"; tss\_id "TSS6149";  
chr1 Cufflinks exon198811243 198820368 . - . gene\_id "XLOC\_004851"; transcript\_id "TCONS\_00008314"; exon\_number "1";  
oId "CUFF.7541.4"; tss\_id "TSS6150";  
chr1 Cufflinks exon198869540 198869699 . - . gene\_id "XLOC\_004851"; transcript\_id "TCONS\_00008314"; exon\_number "2";  
oId "CUFF.7541.4"; tss\_id "TSS6150";  
chr1 Cufflinks exon198906356 198906558 . - . gene\_id "XLOC\_004851"; transcript\_id "TCONS\_00008314"; exon\_number "3";  
oId "CUFF.7541.4"; tss\_id "TSS6150";  
chr1 Cufflinks exon198811243 198833641 . - . gene\_id "XLOC\_004851"; transcript\_id "TCONS\_00008315"; exon\_number "1";  
oId "CUFF.7541.2"; tss\_id "TSS6151";  
chr1 Cufflinks exon198863816 198863871 . - . gene\_id "XLOC\_004851"; transcript\_id "TCONS\_00008315"; exon\_number "2";  
oId "CUFF.7541.2"; tss\_id "TSS6151";  
chr1 Cufflinks exon198867699 198869698 . - . gene\_id "XLOC\_004851"; transcript\_id "TCONS\_00008315"; exon\_number "3";  
oId "CUFF.7541.2"; tss\_id "TSS6151";  
chr1 Cufflinks exon198906355 198908941 . - . gene\_id "XLOC\_004851"; transcript\_id "TCONS\_00008315"; exon\_number "4";  
oId "CUFF.7541.2"; tss\_id "TSS6151";

|                                       |           |   |   |   |                                                                          |
|---------------------------------------|-----------|---|---|---|--------------------------------------------------------------------------|
| chr1 Cufflinks exon198912777          | 198912943 | . | - | . | gene_id "XLOC_004851"; transcript_id "TCONS_00008315"; exon_number "5";  |
| oId "CUFF.7541.2"; tss_id "TSS6151";  |           |   |   |   |                                                                          |
| chr1 Cufflinks exon198915439          | 198915850 | . | - | . | gene_id "XLOC_004851"; transcript_id "TCONS_00008315"; exon_number "6";  |
| oId "CUFF.7541.2"; tss_id "TSS6151";  |           |   |   |   |                                                                          |
| chr1 Cufflinks exon198955569          | 198955603 | . | - | . | gene_id "XLOC_004851"; transcript_id "TCONS_00008315"; exon_number "7";  |
| oId "CUFF.7541.2"; tss_id "TSS6151";  |           |   |   |   |                                                                          |
| chr1 Cufflinks exon198957592          | 198957877 | . | - | . | gene_id "XLOC_004851"; transcript_id "TCONS_00008315"; exon_number "8";  |
| oId "CUFF.7541.2"; tss_id "TSS6151";  |           |   |   |   |                                                                          |
| chr1 Cufflinks exon198975843          | 198983622 | . | - | . | gene_id "XLOC_004851"; transcript_id "TCONS_00008315"; exon_number "9";  |
| oId "CUFF.7541.2"; tss_id "TSS6151";  |           |   |   |   |                                                                          |
| chr1 Cufflinks exon198999792          | 199003277 | . | - | . | gene_id "XLOC_004851"; transcript_id "TCONS_00008315"; exon_number "10"; |
| oId "CUFF.7541.2"; tss_id "TSS6151";  |           |   |   |   |                                                                          |
| chr1 Cufflinks exon198833671          | 198869699 | . | - | . | gene_id "XLOC_004851"; transcript_id "TCONS_00008316"; exon_number "1";  |
| oId "CUFF.7541.5"; tss_id "TSS6152";  |           |   |   |   |                                                                          |
| chr1 Cufflinks exon198906356          | 198908941 | . | - | . | gene_id "XLOC_004851"; transcript_id "TCONS_00008316"; exon_number "2";  |
| oId "CUFF.7541.5"; tss_id "TSS6152";  |           |   |   |   |                                                                          |
| chr1 Cufflinks exon198912777          | 198912943 | . | - | . | gene_id "XLOC_004851"; transcript_id "TCONS_00008316"; exon_number "3";  |
| oId "CUFF.7541.5"; tss_id "TSS6152";  |           |   |   |   |                                                                          |
| chr1 Cufflinks exon198915439          | 198917280 | . | - | . | gene_id "XLOC_004851"; transcript_id "TCONS_00008316"; exon_number "4";  |
| oId "CUFF.7541.5"; tss_id "TSS6152";  |           |   |   |   |                                                                          |
| chr1 Cufflinks exon198833671          | 198869698 | . | - | . | gene_id "XLOC_004851"; transcript_id "TCONS_00008318"; exon_number "1";  |
| oId "CUFF.7541.7"; tss_id "TSS6148";  |           |   |   |   |                                                                          |
| chr1 Cufflinks exon198906355          | 198906445 | . | - | . | gene_id "XLOC_004851"; transcript_id "TCONS_00008318"; exon_number "2";  |
| oId "CUFF.7541.7"; tss_id "TSS6148";  |           |   |   |   |                                                                          |
| chr1 Cufflinks exon198989947          | 198990117 | . | - | . | gene_id "XLOC_004851"; transcript_id "TCONS_00008318"; exon_number "3";  |
| oId "CUFF.7541.7"; tss_id "TSS6148";  |           |   |   |   |                                                                          |
| chr1 Cufflinks exon198833671          | 198867761 | . | - | . | gene_id "XLOC_004851"; transcript_id "TCONS_00008317"; exon_number "1";  |
| oId "CUFF.7541.6"; tss_id "TSS6148";  |           |   |   |   |                                                                          |
| chr1 Cufflinks exon198869548          | 198869698 | . | - | . | gene_id "XLOC_004851"; transcript_id "TCONS_00008317"; exon_number "2";  |
| oId "CUFF.7541.6"; tss_id "TSS6148";  |           |   |   |   |                                                                          |
| chr1 Cufflinks exon198906355          | 198906445 | . | - | . | gene_id "XLOC_004851"; transcript_id "TCONS_00008317"; exon_number "3";  |
| oId "CUFF.7541.6"; tss_id "TSS6148";  |           |   |   |   |                                                                          |
| chr1 Cufflinks exon198989947          | 198990117 | . | - | . | gene_id "XLOC_004851"; transcript_id "TCONS_00008317"; exon_number "4";  |
| oId "CUFF.7541.6"; tss_id "TSS6148";  |           |   |   |   |                                                                          |
| chr1 Cufflinks exon198903362          | 198904917 | . | - | . | gene_id "XLOC_004851"; transcript_id "TCONS_00008321"; exon_number "1";  |
| oId "CUFF.7541.9"; tss_id "TSS6150";  |           |   |   |   |                                                                          |
| chr1 Cufflinks exon198906355          | 198906558 | . | - | . | gene_id "XLOC_004851"; transcript_id "TCONS_00008321"; exon_number "2";  |
| oId "CUFF.7541.9"; tss_id "TSS6150";  |           |   |   |   |                                                                          |
| chr1 Cufflinks exon198905676          | 198906445 | . | - | . | gene_id "XLOC_004851"; transcript_id "TCONS_00008322"; exon_number "1";  |
| oId "CUFF.7541.10"; tss_id "TSS6154"; |           |   |   |   |                                                                          |
| chr1 Cufflinks exon198908720          | 198908941 | . | - | . | gene_id "XLOC_004851"; transcript_id "TCONS_00008322"; exon_number "2";  |
| oId "CUFF.7541.10"; tss_id "TSS6154"; |           |   |   |   |                                                                          |
| chr1 Cufflinks exon198912777          | 198912943 | . | - | . | gene_id "XLOC_004851"; transcript_id "TCONS_00008322"; exon_number "3";  |

oId "CUFF.7541.10"; tss\_id "TSS6154";  
chr1 Cufflinks exon198915439 198915850 . - . gene\_id "XLOC\_004851"; transcript\_id "TCONS\_00008322"; exon\_number "4";  
oId "CUFF.7541.10"; tss\_id "TSS6154";  
chr1 Cufflinks exon198955569 198955603 . - . gene\_id "XLOC\_004851"; transcript\_id "TCONS\_00008322"; exon\_number "5";  
oId "CUFF.7541.10"; tss\_id "TSS6154";  
chr1 Cufflinks exon198957592 198961650 . - . gene\_id "XLOC\_004851"; transcript\_id "TCONS\_00008322"; exon\_number "6";  
oId "CUFF.7541.10"; tss\_id "TSS6154";  
chr1 Cufflinks exon198970333 198975231 . - . gene\_id "XLOC\_004851"; transcript\_id "TCONS\_00008322"; exon\_number "7";  
oId "CUFF.7541.10"; tss\_id "TSS6154";  
chr1 Cufflinks exon198975843 198976078 . - . gene\_id "XLOC\_004851"; transcript\_id "TCONS\_00008322"; exon\_number "8";  
oId "CUFF.7541.10"; tss\_id "TSS6154";  
chr1 Cufflinks exon198977523 198977697 . - . gene\_id "XLOC\_004851"; transcript\_id "TCONS\_00008322"; exon\_number "9";  
oId "CUFF.7541.10"; tss\_id "TSS6154";  
chr1 Cufflinks exon198982242 198988792 . - . gene\_id "XLOC\_004851"; transcript\_id "TCONS\_00008322"; exon\_number "10";  
oId "CUFF.7541.10"; tss\_id "TSS6154";  
chr1 Cufflinks exon198958541 198962127 . - . gene\_id "XLOC\_004851"; transcript\_id "TCONS\_00008331"; exon\_number "1";  
oId "CUFF.7541.16"; tss\_id "TSS6157";  
chr1 Cufflinks exon198977523 198977697 . - . gene\_id "XLOC\_004851"; transcript\_id "TCONS\_00008331"; exon\_number "2";  
oId "CUFF.7541.16"; tss\_id "TSS6157";  
chr1 Cufflinks exon198987911 198988093 . - . gene\_id "XLOC\_004851"; transcript\_id "TCONS\_00008331"; exon\_number "3";  
oId "CUFF.7541.16"; tss\_id "TSS6157";  
chr1 Cufflinks exon198958541 198962127 . - . gene\_id "XLOC\_004851"; transcript\_id "TCONS\_00008332"; exon\_number "1";  
oId "CUFF.7541.14"; tss\_id "TSS6158";  
chr1 Cufflinks exon199086073 199086157 . - . gene\_id "XLOC\_004851"; transcript\_id "TCONS\_00008332"; exon\_number "2";  
oId "CUFF.7541.14"; tss\_id "TSS6158";  
chr1 Cufflinks exon199147050 199147112 . - . gene\_id "XLOC\_004851"; transcript\_id "TCONS\_00008332"; exon\_number "3";  
oId "CUFF.7541.14"; tss\_id "TSS6158";  
chr1 Cufflinks exon199147911 199147945 . - . gene\_id "XLOC\_004851"; transcript\_id "TCONS\_00008332"; exon\_number "4";  
oId "CUFF.7541.14"; tss\_id "TSS6158";  
chr1 Cufflinks exon199010545 199011012 . - . gene\_id "XLOC\_004851"; transcript\_id "TCONS\_00008339"; exon\_number "1";  
oId "CUFF.7541.18"; tss\_id "TSS6160";  
chr1 Cufflinks exon199016226 199016397 . - . gene\_id "XLOC\_004851"; transcript\_id "TCONS\_00008339"; exon\_number "2";  
oId "CUFF.7541.18"; tss\_id "TSS6160";  
chr1 Cufflinks exon199016776 199016795 . - . gene\_id "XLOC\_004851"; transcript\_id "TCONS\_00008339"; exon\_number "3";  
oId "CUFF.7541.18"; tss\_id "TSS6160";  
chr1 Cufflinks exon199010545 199011012 . - . gene\_id "XLOC\_004851"; transcript\_id "TCONS\_00008340"; exon\_number "1";  
oId "CUFF.7541.21"; tss\_id "TSS6161";  
chr1 Cufflinks exon199017080 199017099 . - . gene\_id "XLOC\_004851"; transcript\_id "TCONS\_00008340"; exon\_number "2";  
oId "CUFF.7541.21"; tss\_id "TSS6161";  
chr1 Cufflinks exon199010545 199011012 . - . gene\_id "XLOC\_004851"; transcript\_id "TCONS\_00008341"; exon\_number "1";  
oId "CUFF.7541.19"; tss\_id "TSS6162";  
chr1 Cufflinks exon199016226 199016397 . - . gene\_id "XLOC\_004851"; transcript\_id "TCONS\_00008341"; exon\_number "2";  
oId "CUFF.7541.19"; tss\_id "TSS6162";



|                                       |           |   |   |   |                                                                         |
|---------------------------------------|-----------|---|---|---|-------------------------------------------------------------------------|
| chr1 Cufflinks exon199030678          | 199030715 | . | - | . | gene_id "XLOC_004851"; transcript_id "TCONS_00008341"; exon_number "3"; |
| oId "CUFF.7541.19"; tss_id "TSS6162"; |           |   |   |   |                                                                         |
| chr1 Cufflinks exon199010545          | 199011012 | . | - | . | gene_id "XLOC_004851"; transcript_id "TCONS_00008342"; exon_number "1"; |
| oId "CUFF.7541.20"; tss_id "TSS6163"; |           |   |   |   |                                                                         |
| chr1 Cufflinks exon199086073          | 199086157 | . | - | . | gene_id "XLOC_004851"; transcript_id "TCONS_00008342"; exon_number "2"; |
| oId "CUFF.7541.20"; tss_id "TSS6163"; |           |   |   |   |                                                                         |
| chr1 Cufflinks exon199252967          | 199253084 | . | - | . | gene_id "XLOC_004851"; transcript_id "TCONS_00008342"; exon_number "3"; |
| oId "CUFF.7541.20"; tss_id "TSS6163"; |           |   |   |   |                                                                         |
| chr1 Cufflinks exon205403972          | 205406459 | . | - | . | gene_id "XLOC_004981"; transcript_id "TCONS_00008539"; exon_number "1"; |
| oId "CUFF.7891.2"; tss_id "TSS6321";  |           |   |   |   |                                                                         |
| chr1 Cufflinks exon205409141          | 205409927 | . | - | . | gene_id "XLOC_004981"; transcript_id "TCONS_00008539"; exon_number "2"; |
| oId "CUFF.7891.2"; tss_id "TSS6321";  |           |   |   |   |                                                                         |
| chr1 Cufflinks exon205403972          | 205406459 | . | - | . | gene_id "XLOC_004981"; transcript_id "TCONS_00008541"; exon_number "1"; |
| oId "CUFF.7891.3"; tss_id "TSS6323";  |           |   |   |   |                                                                         |
| chr1 Cufflinks exon205425045          | 205425214 | . | - | . | gene_id "XLOC_004981"; transcript_id "TCONS_00008541"; exon_number "2"; |
| oId "CUFF.7891.3"; tss_id "TSS6323";  |           |   |   |   |                                                                         |
| chr1 Cufflinks exon205647053          | 205647922 | . | - | . | gene_id "XLOC_004989"; transcript_id "TCONS_00008555"; exon_number "1"; |
| oId "CUFF.7918.5"; tss_id "TSS6335";  |           |   |   |   |                                                                         |
| chr1 Cufflinks exon205652608          | 205652675 | . | - | . | gene_id "XLOC_004989"; transcript_id "TCONS_00008555"; exon_number "2"; |
| oId "CUFF.7918.5"; tss_id "TSS6335";  |           |   |   |   |                                                                         |
| chr1 Cufflinks exon206807602          | 206808328 | . | - | . | gene_id "XLOC_005029"; transcript_id "TCONS_00008605"; exon_number "1"; |
| oId "CUFF.8048.1"; tss_id "TSS6381";  |           |   |   |   |                                                                         |
| chr1 Cufflinks exon206808441          | 206808804 | . | - | . | gene_id "XLOC_005029"; transcript_id "TCONS_00008605"; exon_number "2"; |
| oId "CUFF.8048.1"; tss_id "TSS6381";  |           |   |   |   |                                                                         |
| chr1 Cufflinks exon207962733          | 207979442 | . | - | . | gene_id "XLOC_005047"; transcript_id "TCONS_00008634"; exon_number "1"; |
| oId "CUFF.8105.7"; tss_id "TSS6401";  |           |   |   |   |                                                                         |
| chr1 Cufflinks exon207989274          | 207989818 | . | - | . | gene_id "XLOC_005047"; transcript_id "TCONS_00008634"; exon_number "2"; |
| oId "CUFF.8105.7"; tss_id "TSS6401";  |           |   |   |   |                                                                         |
| chr1 Cufflinks exon207962733          | 207980730 | . | - | . | gene_id "XLOC_005047"; transcript_id "TCONS_00008635"; exon_number "1"; |
| oId "CUFF.8105.1"; tss_id "TSS6402";  |           |   |   |   |                                                                         |
| chr1 Cufflinks exon207989274          | 207989425 | . | - | . | gene_id "XLOC_005047"; transcript_id "TCONS_00008635"; exon_number "2"; |
| oId "CUFF.8105.1"; tss_id "TSS6402";  |           |   |   |   |                                                                         |
| chr1 Cufflinks exon207990584          | 207990759 | . | - | . | gene_id "XLOC_005047"; transcript_id "TCONS_00008635"; exon_number "3"; |
| oId "CUFF.8105.1"; tss_id "TSS6402";  |           |   |   |   |                                                                         |
| chr1 Cufflinks exon207992307          | 207992443 | . | - | . | gene_id "XLOC_005047"; transcript_id "TCONS_00008635"; exon_number "4"; |
| oId "CUFF.8105.1"; tss_id "TSS6402";  |           |   |   |   |                                                                         |
| chr1 Cufflinks exon207962733          | 207978751 | . | - | . | gene_id "XLOC_005047"; transcript_id "TCONS_00008636"; exon_number "1"; |
| oId "CUFF.8105.5"; tss_id "TSS6403";  |           |   |   |   |                                                                         |
| chr1 Cufflinks exon207979350          | 207989425 | . | - | . | gene_id "XLOC_005047"; transcript_id "TCONS_00008636"; exon_number "2"; |
| oId "CUFF.8105.5"; tss_id "TSS6403";  |           |   |   |   |                                                                         |
| chr1 Cufflinks exon207990584          | 207990759 | . | - | . | gene_id "XLOC_005047"; transcript_id "TCONS_00008636"; exon_number "3"; |
| oId "CUFF.8105.5"; tss_id "TSS6403";  |           |   |   |   |                                                                         |
| chr1 Cufflinks exon207995549          | 207995648 | . | - | . | gene_id "XLOC_005047"; transcript_id "TCONS_00008636"; exon_number "4"; |

oId "CUFF.8105.5"; tss\_id "TSS6403";  
chr1 Cufflinks exon207962733 207979442 . - . gene\_id "XLOC\_005047"; transcript\_id "TCONS\_00008637"; exon\_number "1";  
oId "CUFF.8105.4"; tss\_id "TSS6404";  
chr1 Cufflinks exon207989274 207989425 . - . gene\_id "XLOC\_005047"; transcript\_id "TCONS\_00008637"; exon\_number "2";  
oId "CUFF.8105.4"; tss\_id "TSS6404";  
chr1 Cufflinks exon207990584 207990759 . - . gene\_id "XLOC\_005047"; transcript\_id "TCONS\_00008637"; exon\_number "3";  
oId "CUFF.8105.4"; tss\_id "TSS6404";  
chr1 Cufflinks exon208000056 208000136 . - . gene\_id "XLOC\_005047"; transcript\_id "TCONS\_00008637"; exon\_number "4";  
oId "CUFF.8105.4"; tss\_id "TSS6404";  
chr1 Cufflinks exon207962733 207989425 . - . gene\_id "XLOC\_005047"; transcript\_id "TCONS\_00008638"; exon\_number "1";  
oId "CUFF.8105.8"; tss\_id "TSS6405";  
chr1 Cufflinks exon207990584 207990759 . - . gene\_id "XLOC\_005047"; transcript\_id "TCONS\_00008638"; exon\_number "2";  
oId "CUFF.8105.8"; tss\_id "TSS6405";  
chr1 Cufflinks exon207992307 207992491 . - . gene\_id "XLOC\_005047"; transcript\_id "TCONS\_00008638"; exon\_number "3";  
oId "CUFF.8105.8"; tss\_id "TSS6405";  
chr1 Cufflinks exon208000056 208020129 . - . gene\_id "XLOC\_005047"; transcript\_id "TCONS\_00008638"; exon\_number "4";  
oId "CUFF.8105.8"; tss\_id "TSS6405";  
chr1 Cufflinks exon207962733 207979442 . - . gene\_id "XLOC\_005047"; transcript\_id "TCONS\_00008639"; exon\_number "1";  
oId "CUFF.8105.6"; tss\_id "TSS6406";  
chr1 Cufflinks exon207989274 207989425 . - . gene\_id "XLOC\_005047"; transcript\_id "TCONS\_00008639"; exon\_number "2";  
oId "CUFF.8105.6"; tss\_id "TSS6406";  
chr1 Cufflinks exon207990584 207990759 . - . gene\_id "XLOC\_005047"; transcript\_id "TCONS\_00008639"; exon\_number "3";  
oId "CUFF.8105.6"; tss\_id "TSS6406";  
chr1 Cufflinks exon208041271 208041368 . - . gene\_id "XLOC\_005047"; transcript\_id "TCONS\_00008639"; exon\_number "4";  
oId "CUFF.8105.6"; tss\_id "TSS6406";  
chr1 Cufflinks exon208042373 208042501 . - . gene\_id "XLOC\_005047"; transcript\_id "TCONS\_00008639"; exon\_number "5";  
oId "CUFF.8105.6"; tss\_id "TSS6406";  
chr1 Cufflinks exon207962733 207989425 . - . gene\_id "XLOC\_005047"; transcript\_id "TCONS\_00008641"; exon\_number "1";  
oId "CUFF.8105.9"; tss\_id "TSS6406";  
chr1 Cufflinks exon207990584 207990759 . - . gene\_id "XLOC\_005047"; transcript\_id "TCONS\_00008641"; exon\_number "2";  
oId "CUFF.8105.9"; tss\_id "TSS6406";  
chr1 Cufflinks exon208041271 208041368 . - . gene\_id "XLOC\_005047"; transcript\_id "TCONS\_00008641"; exon\_number "3";  
oId "CUFF.8105.9"; tss\_id "TSS6406";  
chr1 Cufflinks exon208042373 208042503 . - . gene\_id "XLOC\_005047"; transcript\_id "TCONS\_00008641"; exon\_number "4";  
oId "CUFF.8105.9"; tss\_id "TSS6406";  
chr1 Cufflinks exon207962733 207980710 . - . gene\_id "XLOC\_005047"; transcript\_id "TCONS\_00008640"; exon\_number "1";  
oId "CUFF.8105.2"; tss\_id "TSS6406";  
chr1 Cufflinks exon207989274 207989425 . - . gene\_id "XLOC\_005047"; transcript\_id "TCONS\_00008640"; exon\_number "2";  
oId "CUFF.8105.2"; tss\_id "TSS6406";  
chr1 Cufflinks exon207990584 207990759 . - . gene\_id "XLOC\_005047"; transcript\_id "TCONS\_00008640"; exon\_number "3";  
oId "CUFF.8105.2"; tss\_id "TSS6406";  
chr1 Cufflinks exon208041271 208041368 . - . gene\_id "XLOC\_005047"; transcript\_id "TCONS\_00008640"; exon\_number "4";  
oId "CUFF.8105.2"; tss\_id "TSS6406";

|                                       |           |   |   |   |                                                                         |
|---------------------------------------|-----------|---|---|---|-------------------------------------------------------------------------|
| chr1 Cufflinks exon208042373          | 208042503 | . | - | . | gene_id "XLOC_005047"; transcript_id "TCONS_00008640"; exon_number "5"; |
| oId "CUFF.8105.2"; tss_id "TSS6406";  |           |   |   |   |                                                                         |
| chr1 Cufflinks exon207962733          | 207978751 | . | - | . | gene_id "XLOC_005047"; transcript_id "TCONS_00008642"; exon_number "1"; |
| oId "CUFF.8105.3"; tss_id "TSS6406";  |           |   |   |   |                                                                         |
| chr1 Cufflinks exon207979350          | 207979442 | . | - | . | gene_id "XLOC_005047"; transcript_id "TCONS_00008642"; exon_number "2"; |
| oId "CUFF.8105.3"; tss_id "TSS6406";  |           |   |   |   |                                                                         |
| chr1 Cufflinks exon207989274          | 207989425 | . | - | . | gene_id "XLOC_005047"; transcript_id "TCONS_00008642"; exon_number "3"; |
| oId "CUFF.8105.3"; tss_id "TSS6406";  |           |   |   |   |                                                                         |
| chr1 Cufflinks exon207990584          | 207990759 | . | - | . | gene_id "XLOC_005047"; transcript_id "TCONS_00008642"; exon_number "4"; |
| oId "CUFF.8105.3"; tss_id "TSS6406";  |           |   |   |   |                                                                         |
| chr1 Cufflinks exon208041271          | 208041368 | . | - | . | gene_id "XLOC_005047"; transcript_id "TCONS_00008642"; exon_number "5"; |
| oId "CUFF.8105.3"; tss_id "TSS6406";  |           |   |   |   |                                                                         |
| chr1 Cufflinks exon208042373          | 208042552 | . | - | . | gene_id "XLOC_005047"; transcript_id "TCONS_00008642"; exon_number "6"; |
| oId "CUFF.8105.3"; tss_id "TSS6406";  |           |   |   |   |                                                                         |
| chr1 Cufflinks exon208038381          | 208041368 | . | - | . | gene_id "XLOC_005047"; transcript_id "TCONS_00008646"; exon_number "1"; |
| oId "CUFF.8105.11"; tss_id "TSS6406"; |           |   |   |   |                                                                         |
| chr1 Cufflinks exon208042373          | 208042502 | . | - | . | gene_id "XLOC_005047"; transcript_id "TCONS_00008646"; exon_number "2"; |
| oId "CUFF.8105.11"; tss_id "TSS6406"; |           |   |   |   |                                                                         |
| chr1 Cufflinks exon208038381          | 208039658 | . | - | . | gene_id "XLOC_005047"; transcript_id "TCONS_00008647"; exon_number "1"; |
| oId "CUFF.8105.10"; tss_id "TSS6407"; |           |   |   |   |                                                                         |
| chr1 Cufflinks exon208039999          | 208041368 | . | - | . | gene_id "XLOC_005047"; transcript_id "TCONS_00008647"; exon_number "2"; |
| oId "CUFF.8105.10"; tss_id "TSS6407"; |           |   |   |   |                                                                         |
| chr1 Cufflinks exon208042373          | 208042667 | . | - | . | gene_id "XLOC_005047"; transcript_id "TCONS_00008647"; exon_number "3"; |
| oId "CUFF.8105.10"; tss_id "TSS6407"; |           |   |   |   |                                                                         |
| chr1 Cufflinks exon210404804          | 210405116 | . | - | . | gene_id "XLOC_005062"; transcript_id "TCONS_00008671"; exon_number "1"; |
| oId "CUFF.8149.1"; tss_id "TSS6428";  |           |   |   |   |                                                                         |
| chr1 Cufflinks exon210406980          | 210407466 | . | - | . | gene_id "XLOC_005062"; transcript_id "TCONS_00008671"; exon_number "2"; |
| oId "CUFF.8149.1"; tss_id "TSS6428";  |           |   |   |   |                                                                         |
| chr1 Cufflinks exon212386344          | 212386537 | . | - | . | gene_id "XLOC_005081"; transcript_id "TCONS_00008704"; exon_number "1"; |
| oId "CUFF.8224.1"; tss_id "TSS6452";  |           |   |   |   |                                                                         |
| chr1 Cufflinks exon212388041          | 212388118 | . | - | . | gene_id "XLOC_005081"; transcript_id "TCONS_00008704"; exon_number "2"; |
| oId "CUFF.8224.1"; tss_id "TSS6452";  |           |   |   |   |                                                                         |
| chr1 Cufflinks exon212403545          | 212403601 | . | - | . | gene_id "XLOC_005081"; transcript_id "TCONS_00008704"; exon_number "3"; |
| oId "CUFF.8224.1"; tss_id "TSS6452";  |           |   |   |   |                                                                         |
| chr1 Cufflinks exon212407845          | 212408078 | . | - | . | gene_id "XLOC_005081"; transcript_id "TCONS_00008704"; exon_number "4"; |
| oId "CUFF.8224.1"; tss_id "TSS6452";  |           |   |   |   |                                                                         |
| chr1 Cufflinks exon212398620          | 212398855 | . | - | . | gene_id "XLOC_005081"; transcript_id "TCONS_00008705"; exon_number "1"; |
| oId "CUFF.8224.2"; tss_id "TSS6452";  |           |   |   |   |                                                                         |
| chr1 Cufflinks exon212403545          | 212403601 | . | - | . | gene_id "XLOC_005081"; transcript_id "TCONS_00008705"; exon_number "2"; |
| oId "CUFF.8224.2"; tss_id "TSS6452";  |           |   |   |   |                                                                         |
| chr1 Cufflinks exon212407845          | 212408078 | . | - | . | gene_id "XLOC_005081"; transcript_id "TCONS_00008705"; exon_number "3"; |
| oId "CUFF.8224.2"; tss_id "TSS6452";  |           |   |   |   |                                                                         |
| chr1 Cufflinks exon212398620          | 212398855 | . | - | . | gene_id "XLOC_005081"; transcript_id "TCONS_00008706"; exon_number "1"; |

oId "CUFF.8224.3"; tss\_id "TSS6453";  
chr1 Cufflinks exon212403545 212403601 . - . gene\_id "XLOC\_005081"; transcript\_id "TCONS\_00008706"; exon\_number "2";  
oId "CUFF.8224.3"; tss\_id "TSS6453";  
chr1 Cufflinks exon212412249 212412318 . - . gene\_id "XLOC\_005081"; transcript\_id "TCONS\_00008706"; exon\_number "3";  
oId "CUFF.8224.3"; tss\_id "TSS6453";  
chr1 Cufflinks exon212458321 212458363 . - . gene\_id "XLOC\_005081"; transcript\_id "TCONS\_00008706"; exon\_number "4";  
oId "CUFF.8224.3"; tss\_id "TSS6453";  
chr1 Cufflinks exon212800571 212805905 . - . gene\_id "XLOC\_005091"; transcript\_id "TCONS\_00008719"; exon\_number "1";  
oId "CUFF.8253.5"; tss\_id "TSS6464";  
chr1 Cufflinks exon212806922 212809902 . - . gene\_id "XLOC\_005091"; transcript\_id "TCONS\_00008719"; exon\_number "2";  
oId "CUFF.8253.5"; tss\_id "TSS6464";  
chr1 Cufflinks exon212800571 212804805 . - . gene\_id "XLOC\_005091"; transcript\_id "TCONS\_00008718"; exon\_number "1";  
oId "CUFF.8253.4"; tss\_id "TSS6464";  
chr1 Cufflinks exon212805714 212805905 . - . gene\_id "XLOC\_005091"; transcript\_id "TCONS\_00008718"; exon\_number "2";  
oId "CUFF.8253.4"; tss\_id "TSS6464";  
chr1 Cufflinks exon212807831 212809902 . - . gene\_id "XLOC\_005091"; transcript\_id "TCONS\_00008718"; exon\_number "3";  
oId "CUFF.8253.4"; tss\_id "TSS6464";  
chr1 Cufflinks exon212800571 212804805 . - . gene\_id "XLOC\_005091"; transcript\_id "TCONS\_00008717"; exon\_number "1";  
oId "CUFF.8253.2"; tss\_id "TSS6464";  
chr1 Cufflinks exon212805714 212805905 . - . gene\_id "XLOC\_005091"; transcript\_id "TCONS\_00008717"; exon\_number "2";  
oId "CUFF.8253.2"; tss\_id "TSS6464";  
chr1 Cufflinks exon212806922 212809902 . - . gene\_id "XLOC\_005091"; transcript\_id "TCONS\_00008717"; exon\_number "3";  
oId "CUFF.8253.2"; tss\_id "TSS6464";  
chr1 Cufflinks exon212800571 212805905 . - . gene\_id "XLOC\_005091"; transcript\_id "TCONS\_00008720"; exon\_number "1";  
oId "CUFF.8253.1"; tss\_id "TSS6464";  
chr1 Cufflinks exon212809864 212809992 . - . gene\_id "XLOC\_005091"; transcript\_id "TCONS\_00008720"; exon\_number "2";  
oId "CUFF.8253.1"; tss\_id "TSS6464";  
chr1 Cufflinks exon212800571 212804805 . - . gene\_id "XLOC\_005091"; transcript\_id "TCONS\_00008721"; exon\_number "1";  
oId "CUFF.8253.3"; tss\_id "TSS6465";  
chr1 Cufflinks exon212805714 212805905 . - . gene\_id "XLOC\_005091"; transcript\_id "TCONS\_00008721"; exon\_number "2";  
oId "CUFF.8253.3"; tss\_id "TSS6465";  
chr1 Cufflinks exon212837929 212838029 . - . gene\_id "XLOC\_005091"; transcript\_id "TCONS\_00008721"; exon\_number "3";  
oId "CUFF.8253.3"; tss\_id "TSS6465";  
chr1 Cufflinks exon212838678 212838996 . - . gene\_id "XLOC\_005091"; transcript\_id "TCONS\_00008721"; exon\_number "4";  
oId "CUFF.8253.3"; tss\_id "TSS6465";  
chr1 Cufflinks exon212827079 212827613 . - . gene\_id "XLOC\_005091"; transcript\_id "TCONS\_00008726"; exon\_number "1";  
oId "CUFF.8253.7"; tss\_id "TSS6465";  
chr1 Cufflinks exon212837929 212838029 . - . gene\_id "XLOC\_005091"; transcript\_id "TCONS\_00008726"; exon\_number "2";  
oId "CUFF.8253.7"; tss\_id "TSS6465";  
chr1 Cufflinks exon212838661 212838996 . - . gene\_id "XLOC\_005091"; transcript\_id "TCONS\_00008726"; exon\_number "3";  
oId "CUFF.8253.7"; tss\_id "TSS6465";  
chr1 Cufflinks exon213025336 213027651 . - . gene\_id "XLOC\_005100"; transcript\_id "TCONS\_00008740"; exon\_number "1";  
oId "CUFF.8276.3"; tss\_id "TSS6476";

|                                      |           |   |   |   |                                                                         |
|--------------------------------------|-----------|---|---|---|-------------------------------------------------------------------------|
| chr1 Cufflinks exon213031108         | 213031561 | . | - | . | gene_id "XLOC_005100"; transcript_id "TCONS_00008740"; exon_number "2"; |
| oId "CUFF.8276.3"; tss_id "TSS6476"; |           |   |   |   |                                                                         |
| chr1 Cufflinks exon213991188         | 213995776 | . | - | . | gene_id "XLOC_005104"; transcript_id "TCONS_00008752"; exon_number "1"; |
| oId "CUFF.8311.3"; tss_id "TSS6482"; |           |   |   |   |                                                                         |
| chr1 Cufflinks exon214005865         | 214005965 | . | - | . | gene_id "XLOC_005104"; transcript_id "TCONS_00008752"; exon_number "2"; |
| oId "CUFF.8311.3"; tss_id "TSS6482"; |           |   |   |   |                                                                         |
| chr1 Cufflinks exon214068006         | 214068086 | . | - | . | gene_id "XLOC_005104"; transcript_id "TCONS_00008752"; exon_number "3"; |
| oId "CUFF.8311.3"; tss_id "TSS6482"; |           |   |   |   |                                                                         |
| chr1 Cufflinks exon214068737         | 214068861 | . | - | . | gene_id "XLOC_005104"; transcript_id "TCONS_00008752"; exon_number "4"; |
| oId "CUFF.8311.3"; tss_id "TSS6482"; |           |   |   |   |                                                                         |
| chr1 Cufflinks exon214133453         | 214133539 | . | - | . | gene_id "XLOC_005104"; transcript_id "TCONS_00008752"; exon_number "5"; |
| oId "CUFF.8311.3"; tss_id "TSS6482"; |           |   |   |   |                                                                         |
| chr1 Cufflinks exon214139414         | 214139627 | . | - | . | gene_id "XLOC_005104"; transcript_id "TCONS_00008752"; exon_number "6"; |
| oId "CUFF.8311.3"; tss_id "TSS6482"; |           |   |   |   |                                                                         |
| chr1 Cufflinks exon214152654         | 214152915 | . | - | . | gene_id "XLOC_005104"; transcript_id "TCONS_00008752"; exon_number "7"; |
| oId "CUFF.8311.3"; tss_id "TSS6482"; |           |   |   |   |                                                                         |
| chr1 Cufflinks exon213991188         | 213995776 | . | - | . | gene_id "XLOC_005104"; transcript_id "TCONS_00008753"; exon_number "1"; |
| oId "CUFF.8311.6"; tss_id "TSS6483"; |           |   |   |   |                                                                         |
| chr1 Cufflinks exon214005865         | 214005965 | . | - | . | gene_id "XLOC_005104"; transcript_id "TCONS_00008753"; exon_number "2"; |
| oId "CUFF.8311.6"; tss_id "TSS6483"; |           |   |   |   |                                                                         |
| chr1 Cufflinks exon214068006         | 214068086 | . | - | . | gene_id "XLOC_005104"; transcript_id "TCONS_00008753"; exon_number "3"; |
| oId "CUFF.8311.6"; tss_id "TSS6483"; |           |   |   |   |                                                                         |
| chr1 Cufflinks exon214068737         | 214068861 | . | - | . | gene_id "XLOC_005104"; transcript_id "TCONS_00008753"; exon_number "4"; |
| oId "CUFF.8311.6"; tss_id "TSS6483"; |           |   |   |   |                                                                         |
| chr1 Cufflinks exon214139414         | 214139627 | . | - | . | gene_id "XLOC_005104"; transcript_id "TCONS_00008753"; exon_number "5"; |
| oId "CUFF.8311.6"; tss_id "TSS6483"; |           |   |   |   |                                                                         |
| chr1 Cufflinks exon214159412         | 214159496 | . | - | . | gene_id "XLOC_005104"; transcript_id "TCONS_00008753"; exon_number "6"; |
| oId "CUFF.8311.6"; tss_id "TSS6483"; |           |   |   |   |                                                                         |
| chr1 Cufflinks exon213991188         | 213995778 | . | - | . | gene_id "XLOC_005104"; transcript_id "TCONS_00008754"; exon_number "1"; |
| oId "CUFF.8311.2"; tss_id "TSS6484"; |           |   |   |   |                                                                         |
| chr1 Cufflinks exon214005865         | 214005965 | . | - | . | gene_id "XLOC_005104"; transcript_id "TCONS_00008754"; exon_number "2"; |
| oId "CUFF.8311.2"; tss_id "TSS6484"; |           |   |   |   |                                                                         |
| chr1 Cufflinks exon214068006         | 214068086 | . | - | . | gene_id "XLOC_005104"; transcript_id "TCONS_00008754"; exon_number "3"; |
| oId "CUFF.8311.2"; tss_id "TSS6484"; |           |   |   |   |                                                                         |
| chr1 Cufflinks exon214068737         | 214068861 | . | - | . | gene_id "XLOC_005104"; transcript_id "TCONS_00008754"; exon_number "4"; |
| oId "CUFF.8311.2"; tss_id "TSS6484"; |           |   |   |   |                                                                         |
| chr1 Cufflinks exon214139414         | 214139627 | . | - | . | gene_id "XLOC_005104"; transcript_id "TCONS_00008754"; exon_number "5"; |
| oId "CUFF.8311.2"; tss_id "TSS6484"; |           |   |   |   |                                                                         |
| chr1 Cufflinks exon214159412         | 214159684 | . | - | . | gene_id "XLOC_005104"; transcript_id "TCONS_00008754"; exon_number "6"; |
| oId "CUFF.8311.2"; tss_id "TSS6484"; |           |   |   |   |                                                                         |
| chr1 Cufflinks exon213991188         | 213995776 | . | - | . | gene_id "XLOC_005104"; transcript_id "TCONS_00008755"; exon_number "1"; |
| oId "CUFF.8311.4"; tss_id "TSS6485"; |           |   |   |   |                                                                         |
| chr1 Cufflinks exon214068006         | 214068086 | . | - | . | gene_id "XLOC_005104"; transcript_id "TCONS_00008755"; exon_number "2"; |

oId "CUFF.8311.4"; tss\_id "TSS6485";  
chr1 Cufflinks exon214068737 214068861 . - . gene\_id "XLOC\_005104"; transcript\_id "TCONS\_00008755"; exon\_number "3";  
oId "CUFF.8311.4"; tss\_id "TSS6485";  
chr1 Cufflinks exon214074638 214074757 . - . gene\_id "XLOC\_005104"; transcript\_id "TCONS\_00008755"; exon\_number "4";  
oId "CUFF.8311.4"; tss\_id "TSS6485";  
chr1 Cufflinks exon214139419 214139627 . - . gene\_id "XLOC\_005104"; transcript\_id "TCONS\_00008755"; exon\_number "5";  
oId "CUFF.8311.4"; tss\_id "TSS6485";  
chr1 Cufflinks exon214159412 214160559 . - . gene\_id "XLOC\_005104"; transcript\_id "TCONS\_00008755"; exon\_number "6";  
oId "CUFF.8311.4"; tss\_id "TSS6485";  
chr1 Cufflinks exon213991188 213995776 . - . gene\_id "XLOC\_005104"; transcript\_id "TCONS\_00008756"; exon\_number "1";  
oId "CUFF.8311.7"; tss\_id "TSS6486";  
chr1 Cufflinks exon214005865 214005965 . - . gene\_id "XLOC\_005104"; transcript\_id "TCONS\_00008756"; exon\_number "2";  
oId "CUFF.8311.7"; tss\_id "TSS6486";  
chr1 Cufflinks exon214068006 214068086 . - . gene\_id "XLOC\_005104"; transcript\_id "TCONS\_00008756"; exon\_number "3";  
oId "CUFF.8311.7"; tss\_id "TSS6486";  
chr1 Cufflinks exon214068737 214068861 . - . gene\_id "XLOC\_005104"; transcript\_id "TCONS\_00008756"; exon\_number "4";  
oId "CUFF.8311.7"; tss\_id "TSS6486";  
chr1 Cufflinks exon214160816 214160894 . - . gene\_id "XLOC\_005104"; transcript\_id "TCONS\_00008756"; exon\_number "5";  
oId "CUFF.8311.7"; tss\_id "TSS6486";  
chr1 Cufflinks exon213991188 213995776 . - . gene\_id "XLOC\_005104"; transcript\_id "TCONS\_00008757"; exon\_number "1";  
oId "CUFF.8311.5"; tss\_id "TSS6487";  
chr1 Cufflinks exon214005865 214005965 . - . gene\_id "XLOC\_005104"; transcript\_id "TCONS\_00008757"; exon\_number "2";  
oId "CUFF.8311.5"; tss\_id "TSS6487";  
chr1 Cufflinks exon214068006 214068086 . - . gene\_id "XLOC\_005104"; transcript\_id "TCONS\_00008757"; exon\_number "3";  
oId "CUFF.8311.5"; tss\_id "TSS6487";  
chr1 Cufflinks exon214068737 214068861 . - . gene\_id "XLOC\_005104"; transcript\_id "TCONS\_00008757"; exon\_number "4";  
oId "CUFF.8311.5"; tss\_id "TSS6487";  
chr1 Cufflinks exon214139414 214139627 . - . gene\_id "XLOC\_005104"; transcript\_id "TCONS\_00008757"; exon\_number "5";  
oId "CUFF.8311.5"; tss\_id "TSS6487";  
chr1 Cufflinks exon214160923 214161040 . - . gene\_id "XLOC\_005104"; transcript\_id "TCONS\_00008757"; exon\_number "6";  
oId "CUFF.8311.5"; tss\_id "TSS6487";  
chr1 Cufflinks exon213991188 213995776 . - . gene\_id "XLOC\_005104"; transcript\_id "TCONS\_00008758"; exon\_number "1";  
oId "CUFF.8311.1"; tss\_id "TSS6488";  
chr1 Cufflinks exon214005865 214005965 . - . gene\_id "XLOC\_005104"; transcript\_id "TCONS\_00008758"; exon\_number "2";  
oId "CUFF.8311.1"; tss\_id "TSS6488";  
chr1 Cufflinks exon214068006 214068086 . - . gene\_id "XLOC\_005104"; transcript\_id "TCONS\_00008758"; exon\_number "3";  
oId "CUFF.8311.1"; tss\_id "TSS6488";  
chr1 Cufflinks exon214068737 214068861 . - . gene\_id "XLOC\_005104"; transcript\_id "TCONS\_00008758"; exon\_number "4";  
oId "CUFF.8311.1"; tss\_id "TSS6488";  
chr1 Cufflinks exon214160923 214161037 . - . gene\_id "XLOC\_005104"; transcript\_id "TCONS\_00008758"; exon\_number "5";  
oId "CUFF.8311.1"; tss\_id "TSS6488";  
chr1 Cufflinks exon214161177 214161257 . - . gene\_id "XLOC\_005104"; transcript\_id "TCONS\_00008758"; exon\_number "6";  
oId "CUFF.8311.1"; tss\_id "TSS6488";

|                                      |           |   |   |   |                                                                         |
|--------------------------------------|-----------|---|---|---|-------------------------------------------------------------------------|
| chr1 Cufflinks exon214138568         | 214138824 | . | - | . | gene_id "XLOC_005104"; transcript_id "TCONS_00008759"; exon_number "1"; |
| oId "CUFF.8311.8"; tss_id "TSS6488"; |           |   |   |   |                                                                         |
| chr1 Cufflinks exon214139414         | 214139627 | . | - | . | gene_id "XLOC_005104"; transcript_id "TCONS_00008759"; exon_number "2"; |
| oId "CUFF.8311.8"; tss_id "TSS6488"; |           |   |   |   |                                                                         |
| chr1 Cufflinks exon214160923         | 214161037 | . | - | . | gene_id "XLOC_005104"; transcript_id "TCONS_00008759"; exon_number "3"; |
| oId "CUFF.8311.8"; tss_id "TSS6488"; |           |   |   |   |                                                                         |
| chr1 Cufflinks exon214161177         | 214161257 | . | - | . | gene_id "XLOC_005104"; transcript_id "TCONS_00008759"; exon_number "4"; |
| oId "CUFF.8311.8"; tss_id "TSS6488"; |           |   |   |   |                                                                         |
| chr1 Cufflinks exon214156712         | 214158209 | . | - | . | gene_id "XLOC_005104"; transcript_id "TCONS_00008762"; exon_number "1"; |
| oId "CUFF.8311.9"; tss_id "TSS6485"; |           |   |   |   |                                                                         |
| chr1 Cufflinks exon214159412         | 214160559 | . | - | . | gene_id "XLOC_005104"; transcript_id "TCONS_00008762"; exon_number "2"; |
| oId "CUFF.8311.9"; tss_id "TSS6485"; |           |   |   |   |                                                                         |
| chr1 Cufflinks exon219858768         | 219859074 | . | - | . | gene_id "XLOC_005120"; transcript_id "TCONS_00008789"; exon_number "1"; |
| oId "CUFF.8398.1"; tss_id "TSS6508"; |           |   |   |   |                                                                         |
| chr1 Cufflinks exon219963690         | 219963790 | . | - | . | gene_id "XLOC_005120"; transcript_id "TCONS_00008789"; exon_number "2"; |
| oId "CUFF.8398.1"; tss_id "TSS6508"; |           |   |   |   |                                                                         |
| chr1 Cufflinks exon219963993         | 219964019 | . | - | . | gene_id "XLOC_005120"; transcript_id "TCONS_00008789"; exon_number "3"; |
| oId "CUFF.8398.1"; tss_id "TSS6508"; |           |   |   |   |                                                                         |
| chr1 Cufflinks exon219858768         | 219859074 | . | - | . | gene_id "XLOC_005120"; transcript_id "TCONS_00008790"; exon_number "1"; |
| oId "CUFF.8398.2"; tss_id "TSS6509"; |           |   |   |   |                                                                         |
| chr1 Cufflinks exon219882259         | 219882308 | . | - | . | gene_id "XLOC_005120"; transcript_id "TCONS_00008790"; exon_number "2"; |
| oId "CUFF.8398.2"; tss_id "TSS6509"; |           |   |   |   |                                                                         |
| chr1 Cufflinks exon219963690         | 219963793 | . | - | . | gene_id "XLOC_005120"; transcript_id "TCONS_00008790"; exon_number "3"; |
| oId "CUFF.8398.2"; tss_id "TSS6509"; |           |   |   |   |                                                                         |
| chr1 Cufflinks exon219964151         | 219964294 | . | - | . | gene_id "XLOC_005120"; transcript_id "TCONS_00008790"; exon_number "4"; |
| oId "CUFF.8398.2"; tss_id "TSS6509"; |           |   |   |   |                                                                         |
| chr1 Cufflinks exon221044834         | 221045033 | . | - | . | gene_id "XLOC_005127"; transcript_id "TCONS_00008801"; exon_number "1"; |
| oId "CUFF.8413.3"; tss_id "TSS6516"; |           |   |   |   |                                                                         |
| chr1 Cufflinks exon221053191         | 221053556 | . | - | . | gene_id "XLOC_005127"; transcript_id "TCONS_00008801"; exon_number "2"; |
| oId "CUFF.8413.3"; tss_id "TSS6516"; |           |   |   |   |                                                                         |
| chr1 Cufflinks exon223265180         | 223266764 | . | - | . | gene_id "XLOC_005137"; transcript_id "TCONS_00008820"; exon_number "1"; |
| oId "CUFF.8461.4"; tss_id "TSS6530"; |           |   |   |   |                                                                         |
| chr1 Cufflinks exon223267431         | 223267720 | . | - | . | gene_id "XLOC_005137"; transcript_id "TCONS_00008820"; exon_number "2"; |
| oId "CUFF.8461.4"; tss_id "TSS6530"; |           |   |   |   |                                                                         |
| chr1 Cufflinks exon224799102         | 224799294 | . | - | . | gene_id "XLOC_005164"; transcript_id "TCONS_00008882"; exon_number "1"; |
| oId "CUFF.8545.1"; tss_id "TSS6571"; |           |   |   |   |                                                                         |
| chr1 Cufflinks exon224802906         | 224803124 | . | - | . | gene_id "XLOC_005164"; transcript_id "TCONS_00008882"; exon_number "2"; |
| oId "CUFF.8545.1"; tss_id "TSS6571"; |           |   |   |   |                                                                         |
| chr1 Cufflinks exon225627816         | 225627826 | . | - | . | gene_id "XLOC_005167"; transcript_id "TCONS_00008885"; exon_number "1"; |
| oId "CUFF.8609.1"; tss_id "TSS6574"; |           |   |   |   |                                                                         |
| chr1 Cufflinks exon225652925         | 225653067 | . | - | . | gene_id "XLOC_005167"; transcript_id "TCONS_00008885"; exon_number "2"; |
| oId "CUFF.8609.1"; tss_id "TSS6574"; |           |   |   |   |                                                                         |
| chr1 Cufflinks exon225654891         | 225655655 | . | - | . | gene_id "XLOC_005167"; transcript_id "TCONS_00008885"; exon_number "3"; |

oId "CUFF.8609.1"; tss\_id "TSS6574";  
chr1 Cufflinks exon225635730 225635880 . - . gene\_id "XLOC\_005167"; transcript\_id "TCONS\_00008887"; exon\_number "1";  
oId "CUFF.8609.3"; tss\_id "TSS6575";  
chr1 Cufflinks exon225652925 225653067 . - . gene\_id "XLOC\_005167"; transcript\_id "TCONS\_00008887"; exon\_number "2";  
oId "CUFF.8609.3"; tss\_id "TSS6575";  
chr1 Cufflinks exon225654891 225655491 . - . gene\_id "XLOC\_005167"; transcript\_id "TCONS\_00008887"; exon\_number "3";  
oId "CUFF.8609.3"; tss\_id "TSS6575";  
chr1 Cufflinks exon225635730 225636287 . - . gene\_id "XLOC\_005167"; transcript\_id "TCONS\_00008886"; exon\_number "1";  
oId "CUFF.8609.2"; tss\_id "TSS6575";  
chr1 Cufflinks exon225652925 225653067 . - . gene\_id "XLOC\_005167"; transcript\_id "TCONS\_00008886"; exon\_number "2";  
oId "CUFF.8609.2"; tss\_id "TSS6575";  
chr1 Cufflinks exon225654891 225655491 . - . gene\_id "XLOC\_005167"; transcript\_id "TCONS\_00008886"; exon\_number "3";  
oId "CUFF.8609.2"; tss\_id "TSS6575";  
chr1 Cufflinks exon225636416 225638380 . - . gene\_id "XLOC\_005167"; transcript\_id "TCONS\_00008888"; exon\_number "1";  
oId "CUFF.8609.4"; tss\_id "TSS6575";  
chr1 Cufflinks exon225650096 225650195 . - . gene\_id "XLOC\_005167"; transcript\_id "TCONS\_00008888"; exon\_number "2";  
oId "CUFF.8609.4"; tss\_id "TSS6575";  
chr1 Cufflinks exon225652925 225653067 . - . gene\_id "XLOC\_005167"; transcript\_id "TCONS\_00008888"; exon\_number "3";  
oId "CUFF.8609.4"; tss\_id "TSS6575";  
chr1 Cufflinks exon225654891 225655473 . - . gene\_id "XLOC\_005167"; transcript\_id "TCONS\_00008888"; exon\_number "4";  
oId "CUFF.8609.4"; tss\_id "TSS6575";  
chr1 Cufflinks exon225636416 225638380 . - . gene\_id "XLOC\_005167"; transcript\_id "TCONS\_00008889"; exon\_number "1";  
oId "CUFF.8609.5"; tss\_id "TSS6574";  
chr1 Cufflinks exon225652925 225653067 . - . gene\_id "XLOC\_005167"; transcript\_id "TCONS\_00008889"; exon\_number "2";  
oId "CUFF.8609.5"; tss\_id "TSS6574";  
chr1 Cufflinks exon225654891 225655655 . - . gene\_id "XLOC\_005167"; transcript\_id "TCONS\_00008889"; exon\_number "3";  
oId "CUFF.8609.5"; tss\_id "TSS6574";  
chr1 Cufflinks exon225649253 225649431 . - . gene\_id "XLOC\_005167"; transcript\_id "TCONS\_00008890"; exon\_number "1";  
oId "CUFF.8609.6"; tss\_id "TSS6575";  
chr1 Cufflinks exon225652925 225653067 . - . gene\_id "XLOC\_005167"; transcript\_id "TCONS\_00008890"; exon\_number "2";  
oId "CUFF.8609.6"; tss\_id "TSS6575";  
chr1 Cufflinks exon225654891 225655491 . - . gene\_id "XLOC\_005167"; transcript\_id "TCONS\_00008890"; exon\_number "3";  
oId "CUFF.8609.6"; tss\_id "TSS6575";  
chr1 Cufflinks exon225651938 225653068 . - . gene\_id "XLOC\_005167"; transcript\_id "TCONS\_00008891"; exon\_number "1";  
oId "CUFF.8609.7"; tss\_id "TSS6574";  
chr1 Cufflinks exon225654892 225655621 . - . gene\_id "XLOC\_005167"; transcript\_id "TCONS\_00008891"; exon\_number "2";  
oId "CUFF.8609.7"; tss\_id "TSS6574";  
chr1 Cufflinks exon228351680 228352193 . - . gene\_id "XLOC\_005208"; transcript\_id "TCONS\_00008955"; exon\_number "1";  
oId "CUFF.8752.2"; tss\_id "TSS6627";  
chr1 Cufflinks exon228353175 228353213 . - . gene\_id "XLOC\_005208"; transcript\_id "TCONS\_00008955"; exon\_number "2";  
oId "CUFF.8752.2"; tss\_id "TSS6627";  
chr1 Cufflinks exon228351680 228352193 . - . gene\_id "XLOC\_005208"; transcript\_id "TCONS\_00008956"; exon\_number "1";  
oId "CUFF.8752.1"; tss\_id "TSS6627";



|                                      |           |   |   |   |                                                                         |
|--------------------------------------|-----------|---|---|---|-------------------------------------------------------------------------|
| chr1 Cufflinks exon228352355         | 228353248 | . | - | . | gene_id "XLOC_005208"; transcript_id "TCONS_00008956"; exon_number "2"; |
| oId "CUFF.8752.1"; tss_id "TSS6627"; |           |   |   |   |                                                                         |
| chr1 Cufflinks exon229112827         | 229114726 | . | - | . | gene_id "XLOC_005228"; transcript_id "TCONS_00008978"; exon_number "1"; |
| oId "CUFF.8840.1"; tss_id "TSS6647"; |           |   |   |   |                                                                         |
| chr1 Cufflinks exon229114956         | 229115561 | . | - | . | gene_id "XLOC_005228"; transcript_id "TCONS_00008978"; exon_number "2"; |
| oId "CUFF.8840.1"; tss_id "TSS6647"; |           |   |   |   |                                                                         |
| chr1 Cufflinks exon229112827         | 229115329 | . | - | . | gene_id "XLOC_005228"; transcript_id "TCONS_00008979"; exon_number "1"; |
| oId "CUFF.8840.2"; tss_id "TSS6648"; |           |   |   |   |                                                                         |
| chr1 Cufflinks exon229115877         | 229117016 | . | - | . | gene_id "XLOC_005228"; transcript_id "TCONS_00008979"; exon_number "2"; |
| oId "CUFF.8840.2"; tss_id "TSS6648"; |           |   |   |   |                                                                         |
| chr1 Cufflinks exon229137144         | 229137194 | . | - | . | gene_id "XLOC_005228"; transcript_id "TCONS_00008979"; exon_number "3"; |
| oId "CUFF.8840.2"; tss_id "TSS6648"; |           |   |   |   |                                                                         |
| chr1 Cufflinks exon229222972         | 229225698 | . | - | . | gene_id "XLOC_005235"; transcript_id "TCONS_00008986"; exon_number "1"; |
| oId "CUFF.8852.2"; tss_id "TSS6655"; |           |   |   |   |                                                                         |
| chr1 Cufflinks exon229227253         | 229227313 | . | - | . | gene_id "XLOC_005235"; transcript_id "TCONS_00008986"; exon_number "2"; |
| oId "CUFF.8852.2"; tss_id "TSS6655"; |           |   |   |   |                                                                         |
| chr1 Cufflinks exon229227834         | 229229037 | . | - | . | gene_id "XLOC_005235"; transcript_id "TCONS_00008986"; exon_number "3"; |
| oId "CUFF.8852.2"; tss_id "TSS6655"; |           |   |   |   |                                                                         |
| chr1 Cufflinks exon229258473         | 229259427 | . | - | . | gene_id "XLOC_005235"; transcript_id "TCONS_00008986"; exon_number "4"; |
| oId "CUFF.8852.2"; tss_id "TSS6655"; |           |   |   |   |                                                                         |
| chr1 Cufflinks exon229222972         | 229225698 | . | - | . | gene_id "XLOC_005235"; transcript_id "TCONS_00008987"; exon_number "1"; |
| oId "CUFF.8852.1"; tss_id "TSS6656"; |           |   |   |   |                                                                         |
| chr1 Cufflinks exon229227253         | 229235000 | . | - | . | gene_id "XLOC_005235"; transcript_id "TCONS_00008987"; exon_number "2"; |
| oId "CUFF.8852.1"; tss_id "TSS6656"; |           |   |   |   |                                                                         |
| chr1 Cufflinks exon229237274         | 229258860 | . | - | . | gene_id "XLOC_005235"; transcript_id "TCONS_00008987"; exon_number "3"; |
| oId "CUFF.8852.1"; tss_id "TSS6656"; |           |   |   |   |                                                                         |
| chr1 Cufflinks exon229261749         | 229291490 | . | - | . | gene_id "XLOC_005235"; transcript_id "TCONS_00008987"; exon_number "4"; |
| oId "CUFF.8852.1"; tss_id "TSS6656"; |           |   |   |   |                                                                         |
| chr1 Cufflinks exon229236250         | 229258860 | . | - | . | gene_id "XLOC_005235"; transcript_id "TCONS_00008988"; exon_number "1"; |
| oId "CUFF.8852.4"; tss_id "TSS6656"; |           |   |   |   |                                                                         |
| chr1 Cufflinks exon229290317         | 229291430 | . | - | . | gene_id "XLOC_005235"; transcript_id "TCONS_00008988"; exon_number "2"; |
| oId "CUFF.8852.4"; tss_id "TSS6656"; |           |   |   |   |                                                                         |
| chr1 Cufflinks exon229236250         | 229258860 | . | - | . | gene_id "XLOC_005235"; transcript_id "TCONS_00008989"; exon_number "1"; |
| oId "CUFF.8852.3"; tss_id "TSS6656"; |           |   |   |   |                                                                         |
| chr1 Cufflinks exon229261749         | 229276450 | . | - | . | gene_id "XLOC_005235"; transcript_id "TCONS_00008989"; exon_number "2"; |
| oId "CUFF.8852.3"; tss_id "TSS6656"; |           |   |   |   |                                                                         |
| chr1 Cufflinks exon229278377         | 229284930 | . | - | . | gene_id "XLOC_005235"; transcript_id "TCONS_00008989"; exon_number "3"; |
| oId "CUFF.8852.3"; tss_id "TSS6656"; |           |   |   |   |                                                                         |
| chr1 Cufflinks exon229285051         | 229291490 | . | - | . | gene_id "XLOC_005235"; transcript_id "TCONS_00008989"; exon_number "4"; |
| oId "CUFF.8852.3"; tss_id "TSS6656"; |           |   |   |   |                                                                         |
| chr1 Cufflinks exon229261115         | 229276454 | . | - | . | gene_id "XLOC_005235"; transcript_id "TCONS_00008990"; exon_number "1"; |
| oId "CUFF.8852.5"; tss_id "TSS6656"; |           |   |   |   |                                                                         |
| chr1 Cufflinks exon229284401         | 229284966 | . | - | . | gene_id "XLOC_005235"; transcript_id "TCONS_00008990"; exon_number "2"; |

oId "CUFF.8852.5"; tss\_id "TSS6656";  
chr1 Cufflinks exon229285051 229290897 . - . gene\_id "XLOC\_005235"; transcript\_id "TCONS\_00008990"; exon\_number "3";  
oId "CUFF.8852.5"; tss\_id "TSS6656";  
chr1 Cufflinks exon229291431 229291473 . - . gene\_id "XLOC\_005235"; transcript\_id "TCONS\_00008990"; exon\_number "4";  
oId "CUFF.8852.5"; tss\_id "TSS6656";  
chr1 Cufflinks exon229392762 229394867 . - . gene\_id "XLOC\_005236"; transcript\_id "TCONS\_00008991"; exon\_number "1";  
oId "CUFF.8863.1"; tss\_id "TSS6657";  
chr1 Cufflinks exon229403990 229405374 . - . gene\_id "XLOC\_005236"; transcript\_id "TCONS\_00008991"; exon\_number "2";  
oId "CUFF.8863.1"; tss\_id "TSS6657";  
chr1 Cufflinks exon229406707 229406720 . - . gene\_id "XLOC\_005236"; transcript\_id "TCONS\_00008991"; exon\_number "3";  
oId "CUFF.8863.1"; tss\_id "TSS6657";  
chr1 Cufflinks exon234671910 234672227 . - . gene\_id "XLOC\_005298"; transcript\_id "TCONS\_00009092"; exon\_number "1";  
oId "CUFF.9096.1"; tss\_id "TSS6739";  
chr1 Cufflinks exon234730391 234730488 . - . gene\_id "XLOC\_005298"; transcript\_id "TCONS\_00009092"; exon\_number "2";  
oId "CUFF.9096.1"; tss\_id "TSS6739";  
chr1 Cufflinks exon234680610 234681132 . - . gene\_id "XLOC\_005298"; transcript\_id "TCONS\_00009093"; exon\_number "1";  
oId "CUFF.9096.2"; tss\_id "TSS6739";  
chr1 Cufflinks exon234730391 234730488 . - . gene\_id "XLOC\_005298"; transcript\_id "TCONS\_00009093"; exon\_number "2";  
oId "CUFF.9096.2"; tss\_id "TSS6739";  
chr1 Cufflinks exon234708767 234708893 . - . gene\_id "XLOC\_005298"; transcript\_id "TCONS\_00009095"; exon\_number "1";  
oId "CUFF.9096.4"; tss\_id "TSS6739";  
chr1 Cufflinks exon234730391 234730488 . - . gene\_id "XLOC\_005298"; transcript\_id "TCONS\_00009095"; exon\_number "2";  
oId "CUFF.9096.4"; tss\_id "TSS6739";  
chr1 Cufflinks exon235088388 235093268 . - . gene\_id "XLOC\_005308"; transcript\_id "TCONS\_00009111"; exon\_number "1";  
oId "CUFF.9116.1"; tss\_id "TSS6753";  
chr1 Cufflinks exon235093426 235093825 . - . gene\_id "XLOC\_005308"; transcript\_id "TCONS\_00009111"; exon\_number "2";  
oId "CUFF.9116.1"; tss\_id "TSS6753";  
chr1 Cufflinks exon235095246 235095663 . - . gene\_id "XLOC\_005308"; transcript\_id "TCONS\_00009111"; exon\_number "3";  
oId "CUFF.9116.1"; tss\_id "TSS6753";  
chr1 Cufflinks exon235097164 235097313 . - . gene\_id "XLOC\_005308"; transcript\_id "TCONS\_00009111"; exon\_number "4";  
oId "CUFF.9116.1"; tss\_id "TSS6753";  
chr1 Cufflinks exon235097848 235098494 . - . gene\_id "XLOC\_005308"; transcript\_id "TCONS\_00009111"; exon\_number "5";  
oId "CUFF.9116.1"; tss\_id "TSS6753";  
chr1 Cufflinks exon235088388 235093268 . - . gene\_id "XLOC\_005308"; transcript\_id "TCONS\_00009112"; exon\_number "1";  
oId "CUFF.9116.4"; tss\_id "TSS6754";  
chr1 Cufflinks exon235093426 235093825 . - . gene\_id "XLOC\_005308"; transcript\_id "TCONS\_00009112"; exon\_number "2";  
oId "CUFF.9116.4"; tss\_id "TSS6754";  
chr1 Cufflinks exon235095588 235095663 . - . gene\_id "XLOC\_005308"; transcript\_id "TCONS\_00009112"; exon\_number "3";  
oId "CUFF.9116.4"; tss\_id "TSS6754";  
chr1 Cufflinks exon235099514 235099746 . - . gene\_id "XLOC\_005308"; transcript\_id "TCONS\_00009112"; exon\_number "4";  
oId "CUFF.9116.4"; tss\_id "TSS6754";  
chr1 Cufflinks exon 235088388 235093825 . - . gene\_id "XLOC\_005308"; transcript\_id "TCONS\_00009114";  
exon\_number "1"; oId "CUFF.9116.3"; tss\_id "TSS6755";

|       |           |             |                |                    |                   |   |   |                                                                             |
|-------|-----------|-------------|----------------|--------------------|-------------------|---|---|-----------------------------------------------------------------------------|
| chr1  | Cufflinks | exon        | 235095246      | 235095663          | .                 | - | . | gene_id "XLOC_005308"; transcript_id "TCONS_00009114";                      |
|       |           | exon_number | "2";           | oId "CUFF.9116.3"; | tss_id "TSS6755"; |   |   |                                                                             |
| chr1  | Cufflinks | exon        | 235103131      | 235103247          | .                 | - | . | gene_id "XLOC_005308"; transcript_id "TCONS_00009114";                      |
|       |           | exon_number | "3";           | oId "CUFF.9116.3"; | tss_id "TSS6755"; |   |   |                                                                             |
| chr1  | Cufflinks | exon        | 235104135      | 235104237          | .                 | - | . | gene_id "XLOC_005308"; transcript_id "TCONS_00009114";                      |
|       |           | exon_number | "4";           | oId "CUFF.9116.3"; | tss_id "TSS6755"; |   |   |                                                                             |
| chr1  | Cufflinks | exon        | 235108929      | 235109070          | .                 | - | . | gene_id "XLOC_005308"; transcript_id "TCONS_00009114";                      |
|       |           | exon_number | "5";           | oId "CUFF.9116.3"; | tss_id "TSS6755"; |   |   |                                                                             |
| chr1  | Cufflinks | exon        | 235116403      | 235116529          | .                 | - | . | gene_id "XLOC_005308"; transcript_id "TCONS_00009114";                      |
|       |           | exon_number | "6";           | oId "CUFF.9116.3"; | tss_id "TSS6755"; |   |   |                                                                             |
| chr1  | Cufflinks | exon        | 235088388      | 235093268          | .                 | - | . | gene_id "XLOC_005308"; transcript_id "TCONS_00009113";                      |
|       |           | exon_number | "1";           | oId "CUFF.9116.2"; | tss_id "TSS6755"; |   |   |                                                                             |
| chr1  | Cufflinks | exon        | 235093426      | 235093825          | .                 | - | . | gene_id "XLOC_005308"; transcript_id "TCONS_00009113";                      |
|       |           | exon_number | "2";           | oId "CUFF.9116.2"; | tss_id "TSS6755"; |   |   |                                                                             |
| chr1  | Cufflinks | exon        | 235095588      | 235095663          | .                 | - | . | gene_id "XLOC_005308"; transcript_id "TCONS_00009113";                      |
|       |           | exon_number | "3";           | oId "CUFF.9116.2"; | tss_id "TSS6755"; |   |   |                                                                             |
| chr1  | Cufflinks | exon        | 235097164      | 235097313          | .                 | - | . | gene_id "XLOC_005308"; transcript_id "TCONS_00009113";                      |
|       |           | exon_number | "4";           | oId "CUFF.9116.2"; | tss_id "TSS6755"; |   |   |                                                                             |
| chr1  | Cufflinks | exon        | 235104135      | 235104237          | .                 | - | . | gene_id "XLOC_005308"; transcript_id "TCONS_00009113";                      |
|       |           | exon_number | "5";           | oId "CUFF.9116.2"; | tss_id "TSS6755"; |   |   |                                                                             |
| chr1  | Cufflinks | exon        | 235116403      | 235116529          | .                 | - | . | gene_id "XLOC_005308"; transcript_id "TCONS_00009113";                      |
|       |           | exon_number | "6";           | oId "CUFF.9116.2"; | tss_id "TSS6755"; |   |   |                                                                             |
| chr1  | Cufflinks | exon        | 235110670      | 235116090          | .                 | - | . | gene_id "XLOC_005308"; transcript_id "TCONS_00009119";                      |
|       |           | exon_number | "1";           | oId "CUFF.9116.6"; | tss_id "TSS6755"; |   |   |                                                                             |
| chr1  | Cufflinks | exon        | 235116403      | 235116625          | .                 | - | . | gene_id "XLOC_005308"; transcript_id "TCONS_00009119";                      |
|       |           | exon_number | "2";           | oId "CUFF.9116.6"; | tss_id "TSS6755"; |   |   |                                                                             |
| chr10 | Cufflinks | exon        | 2951239        | 2953777            | .                 | + | . | gene_id "XLOC_005469"; transcript_id "TCONS_00009367"; exon_number "1"; oId |
|       |           |             | "CUFF.9618.1"; | tss_id "TSS6952";  |                   |   |   |                                                                             |
| chr10 | Cufflinks | exon        | 2957074        | 2958655            | .                 | + | . | gene_id "XLOC_005469"; transcript_id "TCONS_00009367"; exon_number "2"; oId |
|       |           |             | "CUFF.9618.1"; | tss_id "TSS6952";  |                   |   |   |                                                                             |
| chr10 | Cufflinks | exon        | 3094234        | 3094480            | .                 | + | . | gene_id "XLOC_005472"; transcript_id "TCONS_00009370"; exon_number "1"; oId |
|       |           |             | "CUFF.9622.1"; | tss_id "TSS6955";  |                   |   |   |                                                                             |
| chr10 | Cufflinks | exon        | 3094700        | 3094736            | .                 | + | . | gene_id "XLOC_005472"; transcript_id "TCONS_00009370"; exon_number "2"; oId |
|       |           |             | "CUFF.9622.1"; | tss_id "TSS6955";  |                   |   |   |                                                                             |
| chr10 | Cufflinks | exon        | 4003383        | 4004379            | .                 | + | . | gene_id "XLOC_005476"; transcript_id "TCONS_00009378"; exon_number "1"; oId |
|       |           |             | "CUFF.9631.2"; | tss_id "TSS6959";  |                   |   |   |                                                                             |
| chr10 | Cufflinks | exon        | 4005215        | 4005316            | .                 | + | . | gene_id "XLOC_005476"; transcript_id "TCONS_00009378"; exon_number "2"; oId |
|       |           |             | "CUFF.9631.2"; | tss_id "TSS6959";  |                   |   |   |                                                                             |
| chr10 | Cufflinks | exon        | 4006341        | 4008383            | .                 | + | . | gene_id "XLOC_005476"; transcript_id "TCONS_00009378"; exon_number "3"; oId |
|       |           |             | "CUFF.9631.2"; | tss_id "TSS6959";  |                   |   |   |                                                                             |
| chr10 | Cufflinks | exon        | 4004906        | 4005114            | .                 | + | . | gene_id "XLOC_005476"; transcript_id "TCONS_00009379"; exon_number "1"; oId |
|       |           |             | "CUFF.9631.3"; | tss_id "TSS6960";  |                   |   |   |                                                                             |
| chr10 | Cufflinks | exon        | 4005215        | 4006149            | .                 | + | . | gene_id "XLOC_005476"; transcript_id "TCONS_00009379"; exon_number "2"; oId |

"CUFF.9631.3"; tss\_id "TSS6960";  
chr10 Cufflinks exon 4004906 4005316 . + . gene\_id "XLOC\_005476"; transcript\_id "TCONS\_00009380"; exon\_number "1"; oId  
"CUFF.9631.4"; tss\_id "TSS6960";  
chr10 Cufflinks exon 4006341 4008383 . + . gene\_id "XLOC\_005476"; transcript\_id "TCONS\_00009380"; exon\_number "2"; oId  
"CUFF.9631.4"; tss\_id "TSS6960";  
chr10 Cufflinks exon 4520046 4520152 . + . gene\_id "XLOC\_005478"; transcript\_id "TCONS\_00009382"; exon\_number "1"; oId  
"CUFF.9635.2"; tss\_id "TSS6962";  
chr10 Cufflinks exon 4549934 4550088 . + . gene\_id "XLOC\_005478"; transcript\_id "TCONS\_00009382"; exon\_number "2"; oId  
"CUFF.9635.2"; tss\_id "TSS6962";  
chr10 Cufflinks exon 4555190 4555243 . + . gene\_id "XLOC\_005478"; transcript\_id "TCONS\_00009382"; exon\_number "3"; oId  
"CUFF.9635.2"; tss\_id "TSS6962";  
chr10 Cufflinks exon 6368507 6368605 . + . gene\_id "XLOC\_005519"; transcript\_id "TCONS\_00009449"; exon\_number "1"; oId  
"CUFF.9740.3"; tss\_id "TSS7011";  
chr10 Cufflinks exon 6369894 6370089 . + . gene\_id "XLOC\_005519"; transcript\_id "TCONS\_00009449"; exon\_number "2"; oId  
"CUFF.9740.3"; tss\_id "TSS7011";  
chr10 Cufflinks exon 6372915 6372978 . + . gene\_id "XLOC\_005519"; transcript\_id "TCONS\_00009449"; exon\_number "3"; oId  
"CUFF.9740.3"; tss\_id "TSS7011";  
chr10 Cufflinks exon 6373173 6373268 . + . gene\_id "XLOC\_005519"; transcript\_id "TCONS\_00009449"; exon\_number "4"; oId  
"CUFF.9740.3"; tss\_id "TSS7011";  
chr10 Cufflinks exon 6373615 6373796 . + . gene\_id "XLOC\_005519"; transcript\_id "TCONS\_00009449"; exon\_number "5"; oId  
"CUFF.9740.3"; tss\_id "TSS7011";  
chr10 Cufflinks exon 6375062 6377170 . + . gene\_id "XLOC\_005519"; transcript\_id "TCONS\_00009449"; exon\_number "6"; oId  
"CUFF.9740.3"; tss\_id "TSS7011";  
chr10 Cufflinks exon 6368507 6368605 . + . gene\_id "XLOC\_005519"; transcript\_id "TCONS\_00009451"; exon\_number "1"; oId  
"CUFF.9740.2"; tss\_id "TSS7011";  
chr10 Cufflinks exon 6369894 6371772 . + . gene\_id "XLOC\_005519"; transcript\_id "TCONS\_00009451"; exon\_number "2";  
oId "CUFF.9740.2"; tss\_id "TSS7011";  
chr10 Cufflinks exon6372915 6372978 . + . gene\_id "XLOC\_005519"; transcript\_id "TCONS\_00009451"; exon\_number "3"; oId  
"CUFF.9740.2"; tss\_id "TSS7011";  
chr10 Cufflinks exon6373173 6373268 . + . gene\_id "XLOC\_005519"; transcript\_id "TCONS\_00009451"; exon\_number "4"; oId  
"CUFF.9740.2"; tss\_id "TSS7011";  
chr10 Cufflinks exon6373615 6373796 . + . gene\_id "XLOC\_005519"; transcript\_id "TCONS\_00009451"; exon\_number "5"; oId  
"CUFF.9740.2"; tss\_id "TSS7011";  
chr10 Cufflinks exon6377219 6379979 . + . gene\_id "XLOC\_005519"; transcript\_id "TCONS\_00009451"; exon\_number "6"; oId  
"CUFF.9740.2"; tss\_id "TSS7011";  
chr10 Cufflinks exon6368507 6368605 . + . gene\_id "XLOC\_005519"; transcript\_id "TCONS\_00009450"; exon\_number "1"; oId  
"CUFF.9740.1"; tss\_id "TSS7011";  
chr10 Cufflinks exon6369894 6371772 . + . gene\_id "XLOC\_005519"; transcript\_id "TCONS\_00009450"; exon\_number "2"; oId  
"CUFF.9740.1"; tss\_id "TSS7011";  
chr10 Cufflinks exon6372915 6372978 . + . gene\_id "XLOC\_005519"; transcript\_id "TCONS\_00009450"; exon\_number "3"; oId  
"CUFF.9740.1"; tss\_id "TSS7011";  
chr10 Cufflinks exon6373173 6373268 . + . gene\_id "XLOC\_005519"; transcript\_id "TCONS\_00009450"; exon\_number "4"; oId  
"CUFF.9740.1"; tss\_id "TSS7011";

|       |                        |          |   |   |   |                                                                                                               |
|-------|------------------------|----------|---|---|---|---------------------------------------------------------------------------------------------------------------|
| chr10 | Cufflinks exon6373463  | 6373565  | . | + | . | gene_id "XLOC_005519"; transcript_id "TCONS_00009450"; exon_number "5"; oId "CUFF.9740.1"; tss_id "TSS7011";  |
| chr10 | Cufflinks exon6377219  | 6379979  | . | + | . | gene_id "XLOC_005519"; transcript_id "TCONS_00009450"; exon_number "6"; oId "CUFF.9740.1"; tss_id "TSS7011";  |
| chr10 | Cufflinks exon6622387  | 6622889  | . | + | . | gene_id "XLOC_005522"; transcript_id "TCONS_00009456"; exon_number "1"; oId "CUFF.9765.2"; tss_id "TSS7015";  |
| chr10 | Cufflinks exon6624100  | 6624163  | . | + | . | gene_id "XLOC_005522"; transcript_id "TCONS_00009456"; exon_number "2"; oId "CUFF.9765.2"; tss_id "TSS7015";  |
| chr10 | Cufflinks exon6625638  | 6627323  | . | + | . | gene_id "XLOC_005522"; transcript_id "TCONS_00009456"; exon_number "3"; oId "CUFF.9765.2"; tss_id "TSS7015";  |
| chr10 | Cufflinks exon6622387  | 6622889  | . | + | . | gene_id "XLOC_005522"; transcript_id "TCONS_00009455"; exon_number "1"; oId "CUFF.9765.1"; tss_id "TSS7015";  |
| chr10 | Cufflinks exon6625638  | 6627323  | . | + | . | gene_id "XLOC_005522"; transcript_id "TCONS_00009455"; exon_number "2"; oId "CUFF.9765.1"; tss_id "TSS7015";  |
| chr10 | Cufflinks exon23416462 | 23416504 | . | + | . | gene_id "XLOC_005636"; transcript_id "TCONS_00009632"; exon_number "1"; oId "CUFF.10174.2"; tss_id "TSS7144"; |
| chr10 | Cufflinks exon23418086 | 23419636 | . | + | . | gene_id "XLOC_005636"; transcript_id "TCONS_00009632"; exon_number "2"; oId "CUFF.10174.2"; tss_id "TSS7144"; |
| chr10 | Cufflinks exon31422813 | 31423156 | . | + | . | gene_id "XLOC_005747"; transcript_id "TCONS_00009795"; exon_number "1"; oId "CUFF.10498.3"; tss_id "TSS7269"; |
| chr10 | Cufflinks exon31423380 | 31423730 | . | + | . | gene_id "XLOC_005747"; transcript_id "TCONS_00009795"; exon_number "2"; oId "CUFF.10498.3"; tss_id "TSS7269"; |
| chr10 | Cufflinks exon31425442 | 31425617 | . | + | . | gene_id "XLOC_005747"; transcript_id "TCONS_00009795"; exon_number "3"; oId "CUFF.10498.3"; tss_id "TSS7269"; |
| chr10 | Cufflinks exon31425723 | 31428175 | . | + | . | gene_id "XLOC_005747"; transcript_id "TCONS_00009795"; exon_number "4"; oId "CUFF.10498.3"; tss_id "TSS7269"; |
| chr10 | Cufflinks exon31432668 | 31433252 | . | + | . | gene_id "XLOC_005747"; transcript_id "TCONS_00009795"; exon_number "5"; oId "CUFF.10498.3"; tss_id "TSS7269"; |
| chr10 | Cufflinks exon31422813 | 31423730 | . | + | . | gene_id "XLOC_005747"; transcript_id "TCONS_00009794"; exon_number "1"; oId "CUFF.10498.2"; tss_id "TSS7269"; |
| chr10 | Cufflinks exon31425442 | 31425617 | . | + | . | gene_id "XLOC_005747"; transcript_id "TCONS_00009794"; exon_number "2"; oId "CUFF.10498.2"; tss_id "TSS7269"; |
| chr10 | Cufflinks exon31425723 | 31433252 | . | + | . | gene_id "XLOC_005747"; transcript_id "TCONS_00009794"; exon_number "3"; oId "CUFF.10498.2"; tss_id "TSS7269"; |
| chr10 | Cufflinks exon31422813 | 31423730 | . | + | . | gene_id "XLOC_005747"; transcript_id "TCONS_00009793"; exon_number "1"; oId "CUFF.10498.1"; tss_id "TSS7269"; |
| chr10 | Cufflinks exon31425723 | 31433252 | . | + | . | gene_id "XLOC_005747"; transcript_id "TCONS_00009793"; exon_number "2"; oId "CUFF.10498.1"; tss_id "TSS7269"; |
| chr10 | Cufflinks exon31435667 | 31436001 | . | + | . | gene_id "XLOC_005748"; transcript_id "TCONS_00009796"; exon_number "1"; oId "CUFF.10499.1"; tss_id "TSS7270"; |
| chr10 | Cufflinks exon31495671 | 31495946 | . | + | . | gene_id "XLOC_005748"; transcript_id "TCONS_00009796"; exon_number "2"; oId "CUFF.10499.1"; tss_id "TSS7270"; |
| chr10 | Cufflinks exon31549924 | 31551328 | . | + | . | gene_id "XLOC_005748"; transcript_id "TCONS_00009796"; exon_number                                            |

|                                            |   |   |   |                                                                    |  |
|--------------------------------------------|---|---|---|--------------------------------------------------------------------|--|
| "3"; oId "CUFF.10499.1"; tss_id "TSS7270"; |   |   |   |                                                                    |  |
| chr10 Cufflinks exon31435667 31436001      | . | + | . | gene_id "XLOC_005748"; transcript_id "TCONS_00009797"; exon_number |  |
| "1"; oId "CUFF.10499.2"; tss_id "TSS7270"; |   |   |   |                                                                    |  |
| chr10 Cufflinks exon31597364 31597480      | . | + | . | gene_id "XLOC_005748"; transcript_id "TCONS_00009797"; exon_number |  |
| "2"; oId "CUFF.10499.2"; tss_id "TSS7270"; |   |   |   |                                                                    |  |
| chr10 Cufflinks exon31603035 31603257      | . | + | . | gene_id "XLOC_005748"; transcript_id "TCONS_00009797"; exon_number |  |
| "3"; oId "CUFF.10499.2"; tss_id "TSS7270"; |   |   |   |                                                                    |  |
| chr10 Cufflinks exon31603918 31604088      | . | + | . | gene_id "XLOC_005748"; transcript_id "TCONS_00009797"; exon_number |  |
| "4"; oId "CUFF.10499.2"; tss_id "TSS7270"; |   |   |   |                                                                    |  |
| chr10 Cufflinks exon31435722 31436001      | . | + | . | gene_id "XLOC_005748"; transcript_id "TCONS_00009798"; exon_number |  |
| "1"; oId "CUFF.10499.3"; tss_id "TSS7270"; |   |   |   |                                                                    |  |
| chr10 Cufflinks exon31495671 31495793      | . | + | . | gene_id "XLOC_005748"; transcript_id "TCONS_00009798"; exon_number |  |
| "2"; oId "CUFF.10499.3"; tss_id "TSS7270"; |   |   |   |                                                                    |  |
| chr10 Cufflinks exon31548911 31548965      | . | + | . | gene_id "XLOC_005748"; transcript_id "TCONS_00009798"; exon_number |  |
| "3"; oId "CUFF.10499.3"; tss_id "TSS7270"; |   |   |   |                                                                    |  |
| chr10 Cufflinks exon31549924 31551328      | . | + | . | gene_id "XLOC_005748"; transcript_id "TCONS_00009798"; exon_number |  |
| "4"; oId "CUFF.10499.3"; tss_id "TSS7270"; |   |   |   |                                                                    |  |
| chr10 Cufflinks exon31435722 31436001      | . | + | . | gene_id "XLOC_005748"; transcript_id "TCONS_00009799"; exon_number |  |
| "1"; oId "CUFF.10499.4"; tss_id "TSS7270"; |   |   |   |                                                                    |  |
| chr10 Cufflinks exon31495671 31495793      | . | + | . | gene_id "XLOC_005748"; transcript_id "TCONS_00009799"; exon_number |  |
| "2"; oId "CUFF.10499.4"; tss_id "TSS7270"; |   |   |   |                                                                    |  |
| chr10 Cufflinks exon31586306 31586318      | . | + | . | gene_id "XLOC_005748"; transcript_id "TCONS_00009799"; exon_number |  |
| "3"; oId "CUFF.10499.4"; tss_id "TSS7270"; |   |   |   |                                                                    |  |
| chr10 Cufflinks exon31435741 31436001      | . | + | . | gene_id "XLOC_005748"; transcript_id "TCONS_00009801"; exon_number |  |
| "1"; oId "CUFF.10499.6"; tss_id "TSS7270"; |   |   |   |                                                                    |  |
| chr10 Cufflinks exon31597364 31597480      | . | + | . | gene_id "XLOC_005748"; transcript_id "TCONS_00009801"; exon_number |  |
| "2"; oId "CUFF.10499.6"; tss_id "TSS7270"; |   |   |   |                                                                    |  |
| chr10 Cufflinks exon31603035 31604088      | . | + | . | gene_id "XLOC_005748"; transcript_id "TCONS_00009801"; exon_number |  |
| "3"; oId "CUFF.10499.6"; tss_id "TSS7270"; |   |   |   |                                                                    |  |
| chr10 Cufflinks exon31435741 31436001      | . | + | . | gene_id "XLOC_005748"; transcript_id "TCONS_00009800"; exon_number |  |
| "1"; oId "CUFF.10499.5"; tss_id "TSS7270"; |   |   |   |                                                                    |  |
| chr10 Cufflinks exon31495671 31495793      | . | + | . | gene_id "XLOC_005748"; transcript_id "TCONS_00009800"; exon_number |  |
| "2"; oId "CUFF.10499.5"; tss_id "TSS7270"; |   |   |   |                                                                    |  |
| chr10 Cufflinks exon31597364 31597480      | . | + | . | gene_id "XLOC_005748"; transcript_id "TCONS_00009800"; exon_number |  |
| "3"; oId "CUFF.10499.5"; tss_id "TSS7270"; |   |   |   |                                                                    |  |
| chr10 Cufflinks exon31599884 31600010      | . | + | . | gene_id "XLOC_005748"; transcript_id "TCONS_00009800"; exon_number |  |
| "4"; oId "CUFF.10499.5"; tss_id "TSS7270"; |   |   |   |                                                                    |  |
| chr10 Cufflinks exon31603035 31604088      | . | + | . | gene_id "XLOC_005748"; transcript_id "TCONS_00009800"; exon_number |  |
| "5"; oId "CUFF.10499.5"; tss_id "TSS7270"; |   |   |   |                                                                    |  |
| chr10 Cufflinks exon31476812 31477128      | . | + | . | gene_id "XLOC_005748"; transcript_id "TCONS_00009812"; exon_number |  |
| "1"; oId "CUFF.10499.9"; tss_id "TSS7271"; |   |   |   |                                                                    |  |
| chr10 Cufflinks exon31495671 31495946      | . | + | . | gene_id "XLOC_005748"; transcript_id "TCONS_00009812"; exon_number |  |
| "2"; oId "CUFF.10499.9"; tss_id "TSS7271"; |   |   |   |                                                                    |  |

|       |                        |          |   |   |   |                                                                                                                |
|-------|------------------------|----------|---|---|---|----------------------------------------------------------------------------------------------------------------|
| chr10 | Cufflinks exon31549924 | 31551328 | . | + | . | gene_id "XLOC_005748"; transcript_id "TCONS_00009812"; exon_number "3"; oId "CUFF.10499.9"; tss_id "TSS7271";  |
| chr10 | Cufflinks exon31476812 | 31477128 | . | + | . | gene_id "XLOC_005748"; transcript_id "TCONS_00009811"; exon_number "1"; oId "CUFF.10499.8"; tss_id "TSS7271";  |
| chr10 | Cufflinks exon31548911 | 31548965 | . | + | . | gene_id "XLOC_005748"; transcript_id "TCONS_00009811"; exon_number "2"; oId "CUFF.10499.8"; tss_id "TSS7271";  |
| chr10 | Cufflinks exon31549924 | 31551328 | . | + | . | gene_id "XLOC_005748"; transcript_id "TCONS_00009811"; exon_number "3"; oId "CUFF.10499.8"; tss_id "TSS7271";  |
| chr10 | Cufflinks exon31537475 | 31537522 | . | + | . | gene_id "XLOC_005748"; transcript_id "TCONS_00009823"; exon_number "1"; oId "CUFF.10499.10"; tss_id "TSS7272"; |
| chr10 | Cufflinks exon31548911 | 31548965 | . | + | . | gene_id "XLOC_005748"; transcript_id "TCONS_00009823"; exon_number "2"; oId "CUFF.10499.10"; tss_id "TSS7272"; |
| chr10 | Cufflinks exon31549924 | 31551328 | . | + | . | gene_id "XLOC_005748"; transcript_id "TCONS_00009823"; exon_number "3"; oId "CUFF.10499.10"; tss_id "TSS7272"; |
| chr10 | Cufflinks exon31554313 | 31554338 | . | + | . | gene_id "XLOC_005748"; transcript_id "TCONS_00009825"; exon_number "1"; oId "CUFF.10499.11"; tss_id "TSS7273"; |
| chr10 | Cufflinks exon31597364 | 31597480 | . | + | . | gene_id "XLOC_005748"; transcript_id "TCONS_00009825"; exon_number "2"; oId "CUFF.10499.11"; tss_id "TSS7273"; |
| chr10 | Cufflinks exon31603035 | 31604088 | . | + | . | gene_id "XLOC_005748"; transcript_id "TCONS_00009825"; exon_number "3"; oId "CUFF.10499.11"; tss_id "TSS7273"; |
| chr10 | Cufflinks exon35104696 | 35104729 | . | + | . | gene_id "XLOC_005793"; transcript_id "TCONS_00009871"; exon_number "1"; oId "CUFF.10622.1"; tss_id "TSS7326";  |
| chr10 | Cufflinks exon35105048 | 35105350 | . | + | . | gene_id "XLOC_005793"; transcript_id "TCONS_00009871"; exon_number "2"; oId "CUFF.10622.1"; tss_id "TSS7326";  |
| chr10 | Cufflinks exon46951451 | 46951783 | . | + | . | gene_id "XLOC_005864"; transcript_id "TCONS_00010008"; exon_number "1"; oId "CUFF.10912.2"; tss_id "TSS7420";  |
| chr10 | Cufflinks exon46966479 | 46972951 | . | + | . | gene_id "XLOC_005864"; transcript_id "TCONS_00010008"; exon_number "2"; oId "CUFF.10912.2"; tss_id "TSS7420";  |
| chr10 | Cufflinks exon48461799 | 48461855 | . | + | . | gene_id "XLOC_005894"; transcript_id "TCONS_00010062"; exon_number "1"; oId "CUFF.11001.1"; tss_id "TSS7461";  |
| chr10 | Cufflinks exon48474326 | 48475111 | . | + | . | gene_id "XLOC_005894"; transcript_id "TCONS_00010062"; exon_number "2"; oId "CUFF.11001.1"; tss_id "TSS7461";  |
| chr10 | Cufflinks exon48475245 | 48475434 | . | + | . | gene_id "XLOC_005894"; transcript_id "TCONS_00010062"; exon_number "3"; oId "CUFF.11001.1"; tss_id "TSS7461";  |
| chr10 | Cufflinks exon48475536 | 48475681 | . | + | . | gene_id "XLOC_005894"; transcript_id "TCONS_00010062"; exon_number "4"; oId "CUFF.11001.1"; tss_id "TSS7461";  |
| chr10 | Cufflinks exon48476174 | 48477723 | . | + | . | gene_id "XLOC_005894"; transcript_id "TCONS_00010062"; exon_number "5"; oId "CUFF.11001.1"; tss_id "TSS7461";  |
| chr10 | Cufflinks exon48474019 | 48475111 | . | + | . | gene_id "XLOC_005894"; transcript_id "TCONS_00010063"; exon_number "1"; oId "CUFF.11001.2"; tss_id "TSS7462";  |
| chr10 | Cufflinks exon48475245 | 48475434 | . | + | . | gene_id "XLOC_005894"; transcript_id "TCONS_00010063"; exon_number "2"; oId "CUFF.11001.2"; tss_id "TSS7462";  |
| chr10 | Cufflinks exon48475536 | 48476330 | . | + | . | gene_id "XLOC_005894"; transcript_id "TCONS_00010063"; exon_number "3"; oId "CUFF.11001.2"; tss_id "TSS7462";  |

|                                                                                     |   |   |   |                                                                    |
|-------------------------------------------------------------------------------------|---|---|---|--------------------------------------------------------------------|
| "3"; oId "CUFF.11001.2"; tss_id "TSS7462";<br>chr10 Cufflinks exon48482888 48488672 | . | + | . | gene_id "XLOC_005894"; transcript_id "TCONS_00010063"; exon_number |
| "4"; oId "CUFF.11001.2"; tss_id "TSS7462";<br>chr10 Cufflinks exon48474326 48475111 | . | + | . | gene_id "XLOC_005894"; transcript_id "TCONS_00010064"; exon_number |
| "1"; oId "CUFF.11001.3"; tss_id "TSS7463";<br>chr10 Cufflinks exon48475245 48475434 | . | + | . | gene_id "XLOC_005894"; transcript_id "TCONS_00010064"; exon_number |
| "2"; oId "CUFF.11001.3"; tss_id "TSS7463";<br>chr10 Cufflinks exon48475536 48475682 | . | + | . | gene_id "XLOC_005894"; transcript_id "TCONS_00010064"; exon_number |
| "3"; oId "CUFF.11001.3"; tss_id "TSS7463";<br>chr10 Cufflinks exon48476174 48477723 | . | + | . | gene_id "XLOC_005894"; transcript_id "TCONS_00010064"; exon_number |
| "4"; oId "CUFF.11001.3"; tss_id "TSS7463";<br>chr10 Cufflinks exon48477819 48488361 | . | + | . | gene_id "XLOC_005894"; transcript_id "TCONS_00010065"; exon_number |
| "1"; oId "CUFF.11001.4"; tss_id "TSS7464";<br>chr10 Cufflinks exon48517146 48517280 | . | + | . | gene_id "XLOC_005894"; transcript_id "TCONS_00010065"; exon_number |
| "2"; oId "CUFF.11001.4"; tss_id "TSS7464";<br>chr10 Cufflinks exon48517366 48517470 | . | + | . | gene_id "XLOC_005894"; transcript_id "TCONS_00010065"; exon_number |
| "3"; oId "CUFF.11001.4"; tss_id "TSS7464";<br>chr10 Cufflinks exon48528117 48528722 | . | + | . | gene_id "XLOC_005894"; transcript_id "TCONS_00010065"; exon_number |
| "4"; oId "CUFF.11001.4"; tss_id "TSS7464";<br>chr10 Cufflinks exon48610376 48610704 | . | + | . | gene_id "XLOC_005906"; transcript_id "TCONS_00010077"; exon_number |
| "1"; oId "CUFF.11024.2"; tss_id "TSS7476";<br>chr10 Cufflinks exon48628334 48635792 | . | + | . | gene_id "XLOC_005906"; transcript_id "TCONS_00010077"; exon_number |
| "2"; oId "CUFF.11024.2"; tss_id "TSS7476";<br>chr10 Cufflinks exon52384026 52384951 | . | + | . | gene_id "XLOC_005939"; transcript_id "TCONS_00010132"; exon_number |
| "1"; oId "CUFF.11157.1"; tss_id "TSS7515";<br>chr10 Cufflinks exon52386430 52386565 | . | + | . | gene_id "XLOC_005939"; transcript_id "TCONS_00010132"; exon_number |
| "2"; oId "CUFF.11157.1"; tss_id "TSS7515";<br>chr10 Cufflinks exon52387098 52387369 | . | + | . | gene_id "XLOC_005939"; transcript_id "TCONS_00010132"; exon_number |
| "3"; oId "CUFF.11157.1"; tss_id "TSS7515";<br>chr10 Cufflinks exon52388791 52388938 | . | + | . | gene_id "XLOC_005939"; transcript_id "TCONS_00010132"; exon_number |
| "4"; oId "CUFF.11157.1"; tss_id "TSS7515";<br>chr10 Cufflinks exon52389337 52391516 | . | + | . | gene_id "XLOC_005939"; transcript_id "TCONS_00010132"; exon_number |
| "5"; oId "CUFF.11157.1"; tss_id "TSS7515";<br>chr10 Cufflinks exon52392169 52396798 | . | + | . | gene_id "XLOC_005939"; transcript_id "TCONS_00010132"; exon_number |
| "6"; oId "CUFF.11157.1"; tss_id "TSS7515";<br>chr10 Cufflinks exon52384509 52384951 | . | + | . | gene_id "XLOC_005939"; transcript_id "TCONS_00010133"; exon_number |
| "1"; oId "CUFF.11157.2"; tss_id "TSS7516";<br>chr10 Cufflinks exon52386430 52386565 | . | + | . | gene_id "XLOC_005939"; transcript_id "TCONS_00010133"; exon_number |
| "2"; oId "CUFF.11157.2"; tss_id "TSS7516";<br>chr10 Cufflinks exon52388791 52388938 | . | + | . | gene_id "XLOC_005939"; transcript_id "TCONS_00010133"; exon_number |
| "3"; oId "CUFF.11157.2"; tss_id "TSS7516";<br>chr10 Cufflinks exon52389337 52391516 | . | + | . | gene_id "XLOC_005939"; transcript_id "TCONS_00010133"; exon_number |
| "4"; oId "CUFF.11157.2"; tss_id "TSS7516";                                          | . | + | . | gene_id "XLOC_005939"; transcript_id "TCONS_00010133"; exon_number |



|       |                        |          |   |   |   |                                                                                                               |
|-------|------------------------|----------|---|---|---|---------------------------------------------------------------------------------------------------------------|
| chr10 | Cufflinks exon52392169 | 52396798 | . | + | . | gene_id "XLOC_005939"; transcript_id "TCONS_00010133"; exon_number "5"; oId "CUFF.11157.2"; tss_id "TSS7516"; |
| chr10 | Cufflinks exon52386407 | 52386565 | . | + | . | gene_id "XLOC_005939"; transcript_id "TCONS_00010135"; exon_number "1"; oId "CUFF.11157.3"; tss_id "TSS7517"; |
| chr10 | Cufflinks exon52387180 | 52387369 | . | + | . | gene_id "XLOC_005939"; transcript_id "TCONS_00010135"; exon_number "2"; oId "CUFF.11157.3"; tss_id "TSS7517"; |
| chr10 | Cufflinks exon52388791 | 52388938 | . | + | . | gene_id "XLOC_005939"; transcript_id "TCONS_00010135"; exon_number "3"; oId "CUFF.11157.3"; tss_id "TSS7517"; |
| chr10 | Cufflinks exon52389337 | 52396798 | . | + | . | gene_id "XLOC_005939"; transcript_id "TCONS_00010135"; exon_number "4"; oId "CUFF.11157.3"; tss_id "TSS7517"; |
| chr10 | Cufflinks exon62556152 | 62567282 | . | + | . | gene_id "XLOC_005966"; transcript_id "TCONS_00010175"; exon_number "1"; oId "CUFF.11240.1"; tss_id "TSS7548"; |
| chr10 | Cufflinks exon62567375 | 62573116 | . | + | . | gene_id "XLOC_005966"; transcript_id "TCONS_00010175"; exon_number "2"; oId "CUFF.11240.1"; tss_id "TSS7548"; |
| chr10 | Cufflinks exon72189475 | 72195770 | . | + | . | gene_id "XLOC_006017"; transcript_id "TCONS_00010265"; exon_number "1"; oId "CUFF.11441.1"; tss_id "TSS7616"; |
| chr10 | Cufflinks exon72199294 | 72199321 | . | + | . | gene_id "XLOC_006017"; transcript_id "TCONS_00010265"; exon_number "2"; oId "CUFF.11441.1"; tss_id "TSS7616"; |
| chr10 | Cufflinks exon73123590 | 73128569 | . | + | . | gene_id "XLOC_006027"; transcript_id "TCONS_00010296"; exon_number "1"; oId "CUFF.11461.4"; tss_id "TSS7634"; |
| chr10 | Cufflinks exon73133399 | 73133497 | . | + | . | gene_id "XLOC_006027"; transcript_id "TCONS_00010296"; exon_number "2"; oId "CUFF.11461.4"; tss_id "TSS7634"; |
| chr10 | Cufflinks exon73134096 | 73135320 | . | + | . | gene_id "XLOC_006027"; transcript_id "TCONS_00010296"; exon_number "3"; oId "CUFF.11461.4"; tss_id "TSS7634"; |
| chr10 | Cufflinks exon73637828 | 73637894 | . | + | . | gene_id "XLOC_006031"; transcript_id "TCONS_00010307"; exon_number "1"; oId "CUFF.11477.1"; tss_id "TSS7641"; |
| chr10 | Cufflinks exon73638089 | 73638243 | . | + | . | gene_id "XLOC_006031"; transcript_id "TCONS_00010307"; exon_number "2"; oId "CUFF.11477.1"; tss_id "TSS7641"; |
| chr10 | Cufflinks exon73638471 | 73638641 | . | + | . | gene_id "XLOC_006031"; transcript_id "TCONS_00010307"; exon_number "3"; oId "CUFF.11477.1"; tss_id "TSS7641"; |
| chr10 | Cufflinks exon73639071 | 73639207 | . | + | . | gene_id "XLOC_006031"; transcript_id "TCONS_00010307"; exon_number "4"; oId "CUFF.11477.1"; tss_id "TSS7641"; |
| chr10 | Cufflinks exon73637828 | 73637894 | . | + | . | gene_id "XLOC_006031"; transcript_id "TCONS_00010308"; exon_number "1"; oId "CUFF.11477.2"; tss_id "TSS7641"; |
| chr10 | Cufflinks exon73638089 | 73638243 | . | + | . | gene_id "XLOC_006031"; transcript_id "TCONS_00010308"; exon_number "2"; oId "CUFF.11477.2"; tss_id "TSS7641"; |
| chr10 | Cufflinks exon73638471 | 73638641 | . | + | . | gene_id "XLOC_006031"; transcript_id "TCONS_00010308"; exon_number "3"; oId "CUFF.11477.2"; tss_id "TSS7641"; |
| chr10 | Cufflinks exon73648607 | 73652378 | . | + | . | gene_id "XLOC_006031"; transcript_id "TCONS_00010308"; exon_number "4"; oId "CUFF.11477.2"; tss_id "TSS7641"; |
| chr10 | Cufflinks exon73637832 | 73637894 | . | + | . | gene_id "XLOC_006031"; transcript_id "TCONS_00010309"; exon_number "1"; oId "CUFF.11477.3"; tss_id "TSS7641"; |
| chr10 | Cufflinks exon73638089 | 73638244 | . | + | . | gene_id "XLOC_006031"; transcript_id "TCONS_00010309"; exon_number                                            |

"2"; oId "CUFF.11477.3"; tss\_id "TSS7641";  
chr10 Cufflinks exon73638472 73638826 . + . gene\_id "XLOC\_006031"; transcript\_id "TCONS\_00010309"; exon\_number  
"3"; oId "CUFF.11477.3"; tss\_id "TSS7641";  
chr10 Cufflinks exon75012499 75012853 . + . gene\_id "XLOC\_006053"; transcript\_id "TCONS\_00010343"; exon\_number  
"1"; oId "CUFF.11564.2"; tss\_id "TSS7663";  
chr10 Cufflinks exon75013651 75014104 . + . gene\_id "XLOC\_006053"; transcript\_id "TCONS\_00010343"; exon\_number  
"2"; oId "CUFF.11564.2"; tss\_id "TSS7663";  
chr10 Cufflinks exon75012499 75012821 . + . gene\_id "XLOC\_006053"; transcript\_id "TCONS\_00010342"; exon\_number  
"1"; oId "CUFF.11564.1"; tss\_id "TSS7663";  
chr10 Cufflinks exon75012949 75013012 . + . gene\_id "XLOC\_006053"; transcript\_id "TCONS\_00010342"; exon\_number  
"2"; oId "CUFF.11564.1"; tss\_id "TSS7663";  
chr10 Cufflinks exon75013651 75014104 . + . gene\_id "XLOC\_006053"; transcript\_id "TCONS\_00010342"; exon\_number  
"3"; oId "CUFF.11564.1"; tss\_id "TSS7663";  
chr10 Cufflinks exon75385823 75389831 . + . gene\_id "XLOC\_006054"; transcript\_id "TCONS\_00010344"; exon\_number  
"1"; oId "CUFF.11608.2"; tss\_id "TSS7664";  
chr10 Cufflinks exon75390297 75391767 . + . gene\_id "XLOC\_006054"; transcript\_id "TCONS\_00010344"; exon\_number  
"2"; oId "CUFF.11608.2"; tss\_id "TSS7664";  
chr10 Cufflinks exon77161286 77162019 . + . gene\_id "XLOC\_006080"; transcript\_id "TCONS\_00010387"; exon\_number  
"1"; oId "CUFF.11692.1"; tss\_id "TSS7695";  
chr10 Cufflinks exon77167013 77168740 . + . gene\_id "XLOC\_006080"; transcript\_id "TCONS\_00010387"; exon\_number  
"2"; oId "CUFF.11692.1"; tss\_id "TSS7695";  
chr10 Cufflinks exon77162655 77162841 . + . gene\_id "XLOC\_006080"; transcript\_id "TCONS\_00010388"; exon\_number  
"1"; oId "CUFF.11692.2"; tss\_id "TSS7696";  
chr10 Cufflinks exon77167013 77168740 . + . gene\_id "XLOC\_006080"; transcript\_id "TCONS\_00010388"; exon\_number  
"2"; oId "CUFF.11692.2"; tss\_id "TSS7696";  
chr10 Cufflinks exon79822467 79822938 . + . gene\_id "XLOC\_006091"; transcript\_id "TCONS\_00010400"; exon\_number  
"1"; oId "CUFF.11718.3"; tss\_id "TSS7707";  
chr10 Cufflinks exon79844216 79844296 . + . gene\_id "XLOC\_006091"; transcript\_id "TCONS\_00010400"; exon\_number  
"2"; oId "CUFF.11718.3"; tss\_id "TSS7707";  
chr10 Cufflinks exon79845541 79845639 . + . gene\_id "XLOC\_006091"; transcript\_id "TCONS\_00010400"; exon\_number  
"3"; oId "CUFF.11718.3"; tss\_id "TSS7707";  
chr10 Cufflinks exon79822467 79822937 . + . gene\_id "XLOC\_006091"; transcript\_id "TCONS\_00010401"; exon\_number  
"1"; oId "CUFF.11718.2"; tss\_id "TSS7707";  
chr10 Cufflinks exon79844216 79844296 . + . gene\_id "XLOC\_006091"; transcript\_id "TCONS\_00010401"; exon\_number  
"2"; oId "CUFF.11718.2"; tss\_id "TSS7707";  
chr10 Cufflinks exon79992315 79992412 . + . gene\_id "XLOC\_006091"; transcript\_id "TCONS\_00010401"; exon\_number  
"3"; oId "CUFF.11718.2"; tss\_id "TSS7707";  
chr10 Cufflinks exon79992683 79993011 . + . gene\_id "XLOC\_006091"; transcript\_id "TCONS\_00010401"; exon\_number  
"4"; oId "CUFF.11718.2"; tss\_id "TSS7707";  
chr10 Cufflinks exon79993284 79993466 . + . gene\_id "XLOC\_006091"; transcript\_id "TCONS\_00010401"; exon\_number  
"5"; oId "CUFF.11718.2"; tss\_id "TSS7707";  
chr10 Cufflinks exon79822487 79822937 . + . gene\_id "XLOC\_006091"; transcript\_id "TCONS\_00010402"; exon\_number  
"1"; oId "CUFF.11718.6"; tss\_id "TSS7707";

|       |                        |          |   |   |   |                                                                                                                |
|-------|------------------------|----------|---|---|---|----------------------------------------------------------------------------------------------------------------|
| chr10 | Cufflinks exon79844216 | 79844296 | . | + | . | gene_id "XLOC_006091"; transcript_id "TCONS_00010402"; exon_number "2"; oId "CUFF.11718.6"; tss_id "TSS7707";  |
| chr10 | Cufflinks exon79993284 | 79993466 | . | + | . | gene_id "XLOC_006091"; transcript_id "TCONS_00010402"; exon_number "3"; oId "CUFF.11718.6"; tss_id "TSS7707";  |
| chr10 | Cufflinks exon79822487 | 79822937 | . | + | . | gene_id "XLOC_006091"; transcript_id "TCONS_00010403"; exon_number "1"; oId "CUFF.11718.7"; tss_id "TSS7707";  |
| chr10 | Cufflinks exon79844216 | 79844296 | . | + | . | gene_id "XLOC_006091"; transcript_id "TCONS_00010403"; exon_number "2"; oId "CUFF.11718.7"; tss_id "TSS7707";  |
| chr10 | Cufflinks exon79973571 | 79974099 | . | + | . | gene_id "XLOC_006091"; transcript_id "TCONS_00010403"; exon_number "3"; oId "CUFF.11718.7"; tss_id "TSS7707";  |
| chr10 | Cufflinks exon80039156 | 80039251 | . | + | . | gene_id "XLOC_006091"; transcript_id "TCONS_00010403"; exon_number "4"; oId "CUFF.11718.7"; tss_id "TSS7707";  |
| chr10 | Cufflinks exon80039352 | 80039970 | . | + | . | gene_id "XLOC_006091"; transcript_id "TCONS_00010403"; exon_number "5"; oId "CUFF.11718.7"; tss_id "TSS7707";  |
| chr10 | Cufflinks exon79822487 | 79822937 | . | + | . | gene_id "XLOC_006091"; transcript_id "TCONS_00010404"; exon_number "1"; oId "CUFF.11718.5"; tss_id "TSS7707";  |
| chr10 | Cufflinks exon79844216 | 79844296 | . | + | . | gene_id "XLOC_006091"; transcript_id "TCONS_00010404"; exon_number "2"; oId "CUFF.11718.5"; tss_id "TSS7707";  |
| chr10 | Cufflinks exon80089794 | 80089820 | . | + | . | gene_id "XLOC_006091"; transcript_id "TCONS_00010404"; exon_number "3"; oId "CUFF.11718.5"; tss_id "TSS7707";  |
| chr10 | Cufflinks exon79970700 | 79970755 | . | + | . | gene_id "XLOC_006091"; transcript_id "TCONS_00010407"; exon_number "1"; oId "CUFF.11718.8"; tss_id "TSS7708";  |
| chr10 | Cufflinks exon79973571 | 79974099 | . | + | . | gene_id "XLOC_006091"; transcript_id "TCONS_00010407"; exon_number "2"; oId "CUFF.11718.8"; tss_id "TSS7708";  |
| chr10 | Cufflinks exon80039156 | 80039251 | . | + | . | gene_id "XLOC_006091"; transcript_id "TCONS_00010407"; exon_number "3"; oId "CUFF.11718.8"; tss_id "TSS7708";  |
| chr10 | Cufflinks exon80039352 | 80039970 | . | + | . | gene_id "XLOC_006091"; transcript_id "TCONS_00010407"; exon_number "4"; oId "CUFF.11718.8"; tss_id "TSS7708";  |
| chr10 | Cufflinks exon79990975 | 79992407 | . | + | . | gene_id "XLOC_006091"; transcript_id "TCONS_00010410"; exon_number "1"; oId "CUFF.11718.10"; tss_id "TSS7710"; |
| chr10 | Cufflinks exon79992682 | 79993010 | . | + | . | gene_id "XLOC_006091"; transcript_id "TCONS_00010410"; exon_number "2"; oId "CUFF.11718.10"; tss_id "TSS7710"; |
| chr10 | Cufflinks exon79993284 | 79993466 | . | + | . | gene_id "XLOC_006091"; transcript_id "TCONS_00010410"; exon_number "3"; oId "CUFF.11718.10"; tss_id "TSS7710"; |
| chr10 | Cufflinks exon80027085 | 80027243 | . | + | . | gene_id "XLOC_006091"; transcript_id "TCONS_00010413"; exon_number "1"; oId "CUFF.11718.11"; tss_id "TSS7711"; |
| chr10 | Cufflinks exon80039156 | 80039251 | . | + | . | gene_id "XLOC_006091"; transcript_id "TCONS_00010413"; exon_number "2"; oId "CUFF.11718.11"; tss_id "TSS7711"; |
| chr10 | Cufflinks exon80039352 | 80039970 | . | + | . | gene_id "XLOC_006091"; transcript_id "TCONS_00010413"; exon_number "3"; oId "CUFF.11718.11"; tss_id "TSS7711"; |
| chr10 | Cufflinks exon82123276 | 82123297 | . | + | . | gene_id "XLOC_006111"; transcript_id "TCONS_00010447"; exon_number "1"; oId "CUFF.11814.1"; tss_id "TSS7744";  |
| chr10 | Cufflinks exon82285286 | 82291188 | . | + | . | gene_id "XLOC_006111"; transcript_id "TCONS_00010447"; exon_number                                             |

"2"; oId "CUFF.11814.1"; tss\_id "TSS7744";  
chr10 Cufflinks exon82293512 82295205 . + . gene\_id "XLOC\_006111"; transcript\_id "TCONS\_00010447"; exon\_number  
"3"; oId "CUFF.11814.1"; tss\_id "TSS7744";  
chr10 Cufflinks exon82283347 82285150 . + . gene\_id "XLOC\_006111"; transcript\_id "TCONS\_00010455"; exon\_number  
"1"; oId "CUFF.11814.3"; tss\_id "TSS7745";  
chr10 Cufflinks exon82287219 82291188 . + . gene\_id "XLOC\_006111"; transcript\_id "TCONS\_00010455"; exon\_number  
"2"; oId "CUFF.11814.3"; tss\_id "TSS7745";  
chr10 Cufflinks exon82293264 82293338 . + . gene\_id "XLOC\_006111"; transcript\_id "TCONS\_00010455"; exon\_number  
"3"; oId "CUFF.11814.3"; tss\_id "TSS7745";  
chr10 Cufflinks exon82283347 82291188 . + . gene\_id "XLOC\_006111"; transcript\_id "TCONS\_00010456"; exon\_number  
"1"; oId "CUFF.11814.2"; tss\_id "TSS7745";  
chr10 Cufflinks exon82293512 82295205 . + . gene\_id "XLOC\_006111"; transcript\_id "TCONS\_00010456"; exon\_number  
"2"; oId "CUFF.11814.2"; tss\_id "TSS7745";  
chr10 Cufflinks exon82291006 82291188 . + . gene\_id "XLOC\_006111"; transcript\_id "TCONS\_00010457"; exon\_number  
"1"; oId "CUFF.11814.4"; tss\_id "TSS7746";  
chr10 Cufflinks exon82292142 82293195 . + . gene\_id "XLOC\_006111"; transcript\_id "TCONS\_00010457"; exon\_number  
"2"; oId "CUFF.11814.4"; tss\_id "TSS7746";  
chr10 Cufflinks exon86039733 86039821 . + . gene\_id "XLOC\_006125"; transcript\_id "TCONS\_00010475"; exon\_number  
"1"; oId "CUFF.11844.3"; tss\_id "TSS7765";  
chr10 Cufflinks exon86047980 86048176 . + . gene\_id "XLOC\_006125"; transcript\_id "TCONS\_00010475"; exon\_number  
"2"; oId "CUFF.11844.3"; tss\_id "TSS7765";  
chr10 Cufflinks exon86048350 86048536 . + . gene\_id "XLOC\_006125"; transcript\_id "TCONS\_00010475"; exon\_number  
"3"; oId "CUFF.11844.3"; tss\_id "TSS7765";  
chr10 Cufflinks exon86048731 86052134 . + . gene\_id "XLOC\_006125"; transcript\_id "TCONS\_00010475"; exon\_number  
"4"; oId "CUFF.11844.3"; tss\_id "TSS7765";  
chr10 Cufflinks exon86053002 86056816 . + . gene\_id "XLOC\_006125"; transcript\_id "TCONS\_00010475"; exon\_number  
"5"; oId "CUFF.11844.3"; tss\_id "TSS7765";  
chr10 Cufflinks exon86039733 86039821 . + . gene\_id "XLOC\_006125"; transcript\_id "TCONS\_00010474"; exon\_number  
"1"; oId "CUFF.11844.2"; tss\_id "TSS7765";  
chr10 Cufflinks exon86047980 86048176 . + . gene\_id "XLOC\_006125"; transcript\_id "TCONS\_00010474"; exon\_number  
"2"; oId "CUFF.11844.2"; tss\_id "TSS7765";  
chr10 Cufflinks exon86048350 86048536 . + . gene\_id "XLOC\_006125"; transcript\_id "TCONS\_00010474"; exon\_number  
"3"; oId "CUFF.11844.2"; tss\_id "TSS7765";  
chr10 Cufflinks exon86048731 86051893 . + . gene\_id "XLOC\_006125"; transcript\_id "TCONS\_00010474"; exon\_number  
"4"; oId "CUFF.11844.2"; tss\_id "TSS7765";  
chr10 Cufflinks exon86053002 86056816 . + . gene\_id "XLOC\_006125"; transcript\_id "TCONS\_00010474"; exon\_number  
"5"; oId "CUFF.11844.2"; tss\_id "TSS7765";  
chr10 Cufflinks exon86039733 86039824 . + . gene\_id "XLOC\_006125"; transcript\_id "TCONS\_00010473"; exon\_number  
"1"; oId "CUFF.11844.1"; tss\_id "TSS7765";  
chr10 Cufflinks exon86047982 86048176 . + . gene\_id "XLOC\_006125"; transcript\_id "TCONS\_00010473"; exon\_number  
"2"; oId "CUFF.11844.1"; tss\_id "TSS7765";  
chr10 Cufflinks exon86048350 86048536 . + . gene\_id "XLOC\_006125"; transcript\_id "TCONS\_00010473"; exon\_number  
"3"; oId "CUFF.11844.1"; tss\_id "TSS7765";

|       |                |          |          |   |   |   |                                                                                                                |
|-------|----------------|----------|----------|---|---|---|----------------------------------------------------------------------------------------------------------------|
| chr10 | Cufflinks exon | 86048731 | 86048800 | . | + | . | gene_id "XLOC_006125"; transcript_id "TCONS_00010473"; exon_number "4"; oId "CUFF.11844.1"; tss_id "TSS7765";  |
| chr10 | Cufflinks exon | 86049275 | 86051893 | . | + | . | gene_id "XLOC_006125"; transcript_id "TCONS_00010473"; exon_number "5"; oId "CUFF.11844.1"; tss_id "TSS7765";  |
| chr10 | Cufflinks exon | 86053002 | 86056816 | . | + | . | gene_id "XLOC_006125"; transcript_id "TCONS_00010473"; exon_number "6"; oId "CUFF.11844.1"; tss_id "TSS7765";  |
| chr10 | Cufflinks exon | 86039736 | 86039821 | . | + | . | gene_id "XLOC_006125"; transcript_id "TCONS_00010478"; exon_number "1"; oId "CUFF.11844.7"; tss_id "TSS7765";  |
| chr10 | Cufflinks exon | 86047984 | 86048176 | . | + | . | gene_id "XLOC_006125"; transcript_id "TCONS_00010478"; exon_number "2"; oId "CUFF.11844.7"; tss_id "TSS7765";  |
| chr10 | Cufflinks exon | 86048350 | 86048800 | . | + | . | gene_id "XLOC_006125"; transcript_id "TCONS_00010478"; exon_number "3"; oId "CUFF.11844.7"; tss_id "TSS7765";  |
| chr10 | Cufflinks exon | 86049275 | 86052134 | . | + | . | gene_id "XLOC_006125"; transcript_id "TCONS_00010478"; exon_number "4"; oId "CUFF.11844.7"; tss_id "TSS7765";  |
| chr10 | Cufflinks exon | 86053002 | 86056816 | . | + | . | gene_id "XLOC_006125"; transcript_id "TCONS_00010478"; exon_number "5"; oId "CUFF.11844.7"; tss_id "TSS7765";  |
| chr10 | Cufflinks exon | 86039736 | 86039821 | . | + | . | gene_id "XLOC_006125"; transcript_id "TCONS_00010479"; exon_number "1"; oId "CUFF.11844.9"; tss_id "TSS7765";  |
| chr10 | Cufflinks exon | 86047980 | 86048176 | . | + | . | gene_id "XLOC_006125"; transcript_id "TCONS_00010479"; exon_number "2"; oId "CUFF.11844.9"; tss_id "TSS7765";  |
| chr10 | Cufflinks exon | 86048350 | 86048536 | . | + | . | gene_id "XLOC_006125"; transcript_id "TCONS_00010479"; exon_number "3"; oId "CUFF.11844.9"; tss_id "TSS7765";  |
| chr10 | Cufflinks exon | 86048731 | 86048800 | . | + | . | gene_id "XLOC_006125"; transcript_id "TCONS_00010479"; exon_number "4"; oId "CUFF.11844.9"; tss_id "TSS7765";  |
| chr10 | Cufflinks exon | 86051163 | 86051893 | . | + | . | gene_id "XLOC_006125"; transcript_id "TCONS_00010479"; exon_number "5"; oId "CUFF.11844.9"; tss_id "TSS7765";  |
| chr10 | Cufflinks exon | 86053002 | 86056816 | . | + | . | gene_id "XLOC_006125"; transcript_id "TCONS_00010479"; exon_number "6"; oId "CUFF.11844.9"; tss_id "TSS7765";  |
| chr10 | Cufflinks exon | 86039736 | 86039821 | . | + | . | gene_id "XLOC_006125"; transcript_id "TCONS_00010477"; exon_number "1"; oId "CUFF.11844.6"; tss_id "TSS7765";  |
| chr10 | Cufflinks exon | 86047984 | 86048176 | . | + | . | gene_id "XLOC_006125"; transcript_id "TCONS_00010477"; exon_number "2"; oId "CUFF.11844.6"; tss_id "TSS7765";  |
| chr10 | Cufflinks exon | 86048350 | 86048536 | . | + | . | gene_id "XLOC_006125"; transcript_id "TCONS_00010477"; exon_number "3"; oId "CUFF.11844.6"; tss_id "TSS7765";  |
| chr10 | Cufflinks exon | 86048731 | 86048800 | . | + | . | gene_id "XLOC_006125"; transcript_id "TCONS_00010477"; exon_number "4"; oId "CUFF.11844.6"; tss_id "TSS7765";  |
| chr10 | Cufflinks exon | 86049275 | 86051893 | . | + | . | gene_id "XLOC_006125"; transcript_id "TCONS_00010477"; exon_number "5"; oId "CUFF.11844.6"; tss_id "TSS7765";  |
| chr10 | Cufflinks exon | 86053002 | 86056816 | . | + | . | gene_id "XLOC_006125"; transcript_id "TCONS_00010477"; exon_number "6"; oId "CUFF.11844.6"; tss_id "TSS7765";  |
| chr10 | Cufflinks exon | 86039736 | 86039821 | . | + | . | gene_id "XLOC_006125"; transcript_id "TCONS_00010476"; exon_number "1"; oId "CUFF.11844.10"; tss_id "TSS7765"; |
| chr10 | Cufflinks exon | 86047984 | 86048176 | . | + | . | gene_id "XLOC_006125"; transcript_id "TCONS_00010476"; exon_number                                             |

"2"; oId "CUFF.11844.10"; tss\_id "TSS7765";  
chr10 Cufflinks exon86048573 86048800 . + . gene\_id "XLOC\_006125"; transcript\_id "TCONS\_00010476"; exon\_number  
"3"; oId "CUFF.11844.10"; tss\_id "TSS7765";  
chr10 Cufflinks exon86049275 86051893 . + . gene\_id "XLOC\_006125"; transcript\_id "TCONS\_00010476"; exon\_number  
"4"; oId "CUFF.11844.10"; tss\_id "TSS7765";  
chr10 Cufflinks exon86053002 86056816 . + . gene\_id "XLOC\_006125"; transcript\_id "TCONS\_00010476"; exon\_number  
"5"; oId "CUFF.11844.10"; tss\_id "TSS7765";  
chr10 Cufflinks exon86122900 86122921 . + . gene\_id "XLOC\_006128"; transcript\_id "TCONS\_00010483"; exon\_number  
"1"; oId "CUFF.11849.1"; tss\_id "TSS7770";  
chr10 Cufflinks exon86320466 86320997 . + . gene\_id "XLOC\_006128"; transcript\_id "TCONS\_00010483"; exon\_number  
"2"; oId "CUFF.11849.1"; tss\_id "TSS7770";  
chr10 Cufflinks exon88281629 88282166 . + . gene\_id "XLOC\_006134"; transcript\_id "TCONS\_00010492"; exon\_number  
"1"; oId "CUFF.11861.1"; tss\_id "TSS7777";  
chr10 Cufflinks exon88282246 88285124 . + . gene\_id "XLOC\_006134"; transcript\_id "TCONS\_00010492"; exon\_number  
"2"; oId "CUFF.11861.1"; tss\_id "TSS7777";  
chr10 Cufflinks exon89820430 89820458 . + . gene\_id "XLOC\_006166"; transcript\_id "TCONS\_00010553"; exon\_number  
"1"; oId "CUFF.11961.1"; tss\_id "TSS7827";  
chr10 Cufflinks exon89821070 89821187 . + . gene\_id "XLOC\_006166"; transcript\_id "TCONS\_00010553"; exon\_number  
"2"; oId "CUFF.11961.1"; tss\_id "TSS7827";  
chr10 Cufflinks exon89829312 89829399 . + . gene\_id "XLOC\_006166"; transcript\_id "TCONS\_00010553"; exon\_number  
"3"; oId "CUFF.11961.1"; tss\_id "TSS7827";  
chr10 Cufflinks exon89892184 89892310 . + . gene\_id "XLOC\_006166"; transcript\_id "TCONS\_00010553"; exon\_number  
"4"; oId "CUFF.11961.1"; tss\_id "TSS7827";  
chr10 Cufflinks exon90125490 90125607 . + . gene\_id "XLOC\_006166"; transcript\_id "TCONS\_00010553"; exon\_number  
"5"; oId "CUFF.11961.1"; tss\_id "TSS7827";  
chr10 Cufflinks exon90129836 90129937 . + . gene\_id "XLOC\_006166"; transcript\_id "TCONS\_00010553"; exon\_number  
"6"; oId "CUFF.11961.1"; tss\_id "TSS7827";  
chr10 Cufflinks exon90133877 90137683 . + . gene\_id "XLOC\_006166"; transcript\_id "TCONS\_00010553"; exon\_number  
"7"; oId "CUFF.11961.1"; tss\_id "TSS7827";  
chr10 Cufflinks exon92706063 92706124 . + . gene\_id "XLOC\_006221"; transcript\_id "TCONS\_00010623"; exon\_number  
"1"; oId "CUFF.12116.6"; tss\_id "TSS7889";  
chr10 Cufflinks exon92706953 92707180 . + . gene\_id "XLOC\_006221"; transcript\_id "TCONS\_00010623"; exon\_number  
"2"; oId "CUFF.12116.6"; tss\_id "TSS7889";  
chr10 Cufflinks exon92707689 92707806 . + . gene\_id "XLOC\_006221"; transcript\_id "TCONS\_00010623"; exon\_number  
"3"; oId "CUFF.12116.6"; tss\_id "TSS7889";  
chr10 Cufflinks exon92765902 92771410 . + . gene\_id "XLOC\_006221"; transcript\_id "TCONS\_00010623"; exon\_number  
"4"; oId "CUFF.12116.6"; tss\_id "TSS7889";  
chr10 Cufflinks exon92706076 92706124 . + . gene\_id "XLOC\_006221"; transcript\_id "TCONS\_00010624"; exon\_number  
"1"; oId "CUFF.12116.7"; tss\_id "TSS7889";  
chr10 Cufflinks exon92706953 92707180 . + . gene\_id "XLOC\_006221"; transcript\_id "TCONS\_00010624"; exon\_number  
"2"; oId "CUFF.12116.7"; tss\_id "TSS7889";  
chr10 Cufflinks exon92707689 92707806 . + . gene\_id "XLOC\_006221"; transcript\_id "TCONS\_00010624"; exon\_number  
"3"; oId "CUFF.12116.7"; tss\_id "TSS7889";

|       |                |           |           |   |   |   |                                                                                                                |
|-------|----------------|-----------|-----------|---|---|---|----------------------------------------------------------------------------------------------------------------|
| chr10 | Cufflinks exon | 92740332  | 92750139  | . | + | . | gene_id "XLOC_006221"; transcript_id "TCONS_00010624"; exon_number "4"; oId "CUFF.12116.7"; tss_id "TSS7889";  |
| chr10 | Cufflinks exon | 92706880  | 92707180  | . | + | . | gene_id "XLOC_006221"; transcript_id "TCONS_00010625"; exon_number "1"; oId "CUFF.12116.8"; tss_id "TSS7890";  |
| chr10 | Cufflinks exon | 92707297  | 92707405  | . | + | . | gene_id "XLOC_006221"; transcript_id "TCONS_00010625"; exon_number "2"; oId "CUFF.12116.8"; tss_id "TSS7890";  |
| chr10 | Cufflinks exon | 92707689  | 92707806  | . | + | . | gene_id "XLOC_006221"; transcript_id "TCONS_00010625"; exon_number "3"; oId "CUFF.12116.8"; tss_id "TSS7890";  |
| chr10 | Cufflinks exon | 92765902  | 92766597  | . | + | . | gene_id "XLOC_006221"; transcript_id "TCONS_00010625"; exon_number "4"; oId "CUFF.12116.8"; tss_id "TSS7890";  |
| chr10 | Cufflinks exon | 92767652  | 92771410  | . | + | . | gene_id "XLOC_006221"; transcript_id "TCONS_00010625"; exon_number "5"; oId "CUFF.12116.8"; tss_id "TSS7890";  |
| chr10 | Cufflinks exon | 92706931  | 92707180  | . | + | . | gene_id "XLOC_006221"; transcript_id "TCONS_00010626"; exon_number "1"; oId "CUFF.12116.10"; tss_id "TSS7890"; |
| chr10 | Cufflinks exon | 92707689  | 92707806  | . | + | . | gene_id "XLOC_006221"; transcript_id "TCONS_00010626"; exon_number "2"; oId "CUFF.12116.10"; tss_id "TSS7890"; |
| chr10 | Cufflinks exon | 92745217  | 92745303  | . | + | . | gene_id "XLOC_006221"; transcript_id "TCONS_00010626"; exon_number "3"; oId "CUFF.12116.10"; tss_id "TSS7890"; |
| chr10 | Cufflinks exon | 92765902  | 92768530  | . | + | . | gene_id "XLOC_006221"; transcript_id "TCONS_00010626"; exon_number "4"; oId "CUFF.12116.10"; tss_id "TSS7890"; |
| chr10 | Cufflinks exon | 92768698  | 92771410  | . | + | . | gene_id "XLOC_006221"; transcript_id "TCONS_00010626"; exon_number "5"; oId "CUFF.12116.10"; tss_id "TSS7890"; |
| chr10 | Cufflinks exon | 92752991  | 92754510  | . | + | . | gene_id "XLOC_006221"; transcript_id "TCONS_00010628"; exon_number "1"; oId "CUFF.12116.18"; tss_id "TSS7891"; |
| chr10 | Cufflinks exon | 92765902  | 92771410  | . | + | . | gene_id "XLOC_006221"; transcript_id "TCONS_00010628"; exon_number "2"; oId "CUFF.12116.18"; tss_id "TSS7891"; |
| chr10 | Cufflinks exon | 94459720  | 94459872  | . | + | . | gene_id "XLOC_006238"; transcript_id "TCONS_00010660"; exon_number "1"; oId "CUFF.12215.1"; tss_id "TSS7913";  |
| chr10 | Cufflinks exon | 94474421  | 94474545  | . | + | . | gene_id "XLOC_006238"; transcript_id "TCONS_00010660"; exon_number "2"; oId "CUFF.12215.1"; tss_id "TSS7913";  |
| chr10 | Cufflinks exon | 94513377  | 94513572  | . | + | . | gene_id "XLOC_006238"; transcript_id "TCONS_00010660"; exon_number "3"; oId "CUFF.12215.1"; tss_id "TSS7913";  |
| chr10 | Cufflinks exon | 94459720  | 94459872  | . | + | . | gene_id "XLOC_006238"; transcript_id "TCONS_00010661"; exon_number "1"; oId "CUFF.12215.2"; tss_id "TSS7913";  |
| chr10 | Cufflinks exon | 94466006  | 94466112  | . | + | . | gene_id "XLOC_006238"; transcript_id "TCONS_00010661"; exon_number "2"; oId "CUFF.12215.2"; tss_id "TSS7913";  |
| chr10 | Cufflinks exon | 94581890  | 94581923  | . | + | . | gene_id "XLOC_006238"; transcript_id "TCONS_00010661"; exon_number "3"; oId "CUFF.12215.2"; tss_id "TSS7913";  |
| chr10 | Cufflinks exon | 101190673 | 101193388 | . | + | . | gene_id "XLOC_006322"; transcript_id "TCONS_00010807"; exon_number "1"; oId "CUFF.12455.1"; tss_id "TSS8012";  |
| chr10 | Cufflinks exon | 101193562 | 101198065 | . | + | . | gene_id "XLOC_006322"; transcript_id "TCONS_00010807"; exon_number "2"; oId "CUFF.12455.1"; tss_id "TSS8012";  |
| chr10 | Cufflinks exon | 101190683 | 101193697 | . | + | . | gene_id "XLOC_006322"; transcript_id "TCONS_00010809"; exon_number                                             |

|                                            |   |   |   |                                                                    |  |
|--------------------------------------------|---|---|---|--------------------------------------------------------------------|--|
| "1"; oId "CUFF.12455.3"; tss_id "TSS8012"; |   |   |   |                                                                    |  |
| chr10 Cufflinks exon101197388 101198065    | . | + | . | gene_id "XLOC_006322"; transcript_id "TCONS_00010809"; exon_number |  |
| "2"; oId "CUFF.12455.3"; tss_id "TSS8012"; |   |   |   |                                                                    |  |
| chr10 Cufflinks exon101190683 101193388    | . | + | . | gene_id "XLOC_006322"; transcript_id "TCONS_00010808"; exon_number |  |
| "1"; oId "CUFF.12455.2"; tss_id "TSS8012"; |   |   |   |                                                                    |  |
| chr10 Cufflinks exon101193625 101198065    | . | + | . | gene_id "XLOC_006322"; transcript_id "TCONS_00010808"; exon_number |  |
| "2"; oId "CUFF.12455.2"; tss_id "TSS8012"; |   |   |   |                                                                    |  |
| chr10 Cufflinks exon102133333 102133769    | . | + | . | gene_id "XLOC_006335"; transcript_id "TCONS_00010827"; exon_number |  |
| "1"; oId "CUFF.12508.5"; tss_id "TSS8028"; |   |   |   |                                                                    |  |
| chr10 Cufflinks exon102140973 102141205    | . | + | . | gene_id "XLOC_006335"; transcript_id "TCONS_00010827"; exon_number |  |
| "2"; oId "CUFF.12508.5"; tss_id "TSS8028"; |   |   |   |                                                                    |  |
| chr10 Cufflinks exon102142437 102142975    | . | + | . | gene_id "XLOC_006335"; transcript_id "TCONS_00010827"; exon_number |  |
| "3"; oId "CUFF.12508.5"; tss_id "TSS8028"; |   |   |   |                                                                    |  |
| chr10 Cufflinks exon102133333 102133769    | . | + | . | gene_id "XLOC_006335"; transcript_id "TCONS_00010826"; exon_number |  |
| "1"; oId "CUFF.12508.4"; tss_id "TSS8028"; |   |   |   |                                                                    |  |
| chr10 Cufflinks exon102140740 102140866    | . | + | . | gene_id "XLOC_006335"; transcript_id "TCONS_00010826"; exon_number |  |
| "2"; oId "CUFF.12508.4"; tss_id "TSS8028"; |   |   |   |                                                                    |  |
| chr10 Cufflinks exon102140973 102141205    | . | + | . | gene_id "XLOC_006335"; transcript_id "TCONS_00010826"; exon_number |  |
| "3"; oId "CUFF.12508.4"; tss_id "TSS8028"; |   |   |   |                                                                    |  |
| chr10 Cufflinks exon102142185 102142975    | . | + | . | gene_id "XLOC_006335"; transcript_id "TCONS_00010826"; exon_number |  |
| "4"; oId "CUFF.12508.4"; tss_id "TSS8028"; |   |   |   |                                                                    |  |
| chr10 Cufflinks exon102133333 102133769    | . | + | . | gene_id "XLOC_006335"; transcript_id "TCONS_00010825"; exon_number |  |
| "1"; oId "CUFF.12508.3"; tss_id "TSS8028"; |   |   |   |                                                                    |  |
| chr10 Cufflinks exon102140740 102140866    | . | + | . | gene_id "XLOC_006335"; transcript_id "TCONS_00010825"; exon_number |  |
| "2"; oId "CUFF.12508.3"; tss_id "TSS8028"; |   |   |   |                                                                    |  |
| chr10 Cufflinks exon102140973 102141205    | . | + | . | gene_id "XLOC_006335"; transcript_id "TCONS_00010825"; exon_number |  |
| "3"; oId "CUFF.12508.3"; tss_id "TSS8028"; |   |   |   |                                                                    |  |
| chr10 Cufflinks exon102142161 102142975    | . | + | . | gene_id "XLOC_006335"; transcript_id "TCONS_00010825"; exon_number |  |
| "4"; oId "CUFF.12508.3"; tss_id "TSS8028"; |   |   |   |                                                                    |  |
| chr10 Cufflinks exon102134833 102134886    | . | + | . | gene_id "XLOC_006335"; transcript_id "TCONS_00010828"; exon_number |  |
| "1"; oId "CUFF.12508.7"; tss_id "TSS8029"; |   |   |   |                                                                    |  |
| chr10 Cufflinks exon102140740 102140866    | . | + | . | gene_id "XLOC_006335"; transcript_id "TCONS_00010828"; exon_number |  |
| "2"; oId "CUFF.12508.7"; tss_id "TSS8029"; |   |   |   |                                                                    |  |
| chr10 Cufflinks exon102140973 102141205    | . | + | . | gene_id "XLOC_006335"; transcript_id "TCONS_00010828"; exon_number |  |
| "3"; oId "CUFF.12508.7"; tss_id "TSS8029"; |   |   |   |                                                                    |  |
| chr10 Cufflinks exon102142185 102142975    | . | + | . | gene_id "XLOC_006335"; transcript_id "TCONS_00010828"; exon_number |  |
| "4"; oId "CUFF.12508.7"; tss_id "TSS8029"; |   |   |   |                                                                    |  |
| chr10 Cufflinks exon103578825 103579005    | . | + | . | gene_id "XLOC_006363"; transcript_id "TCONS_00010878"; exon_number |  |
| "1"; oId "CUFF.12588.1"; tss_id "TSS8066"; |   |   |   |                                                                    |  |
| chr10 Cufflinks exon103587617 103587696    | . | + | . | gene_id "XLOC_006363"; transcript_id "TCONS_00010878"; exon_number |  |
| "2"; oId "CUFF.12588.1"; tss_id "TSS8066"; |   |   |   |                                                                    |  |
| chr10 Cufflinks exon103587938 103588646    | . | + | . | gene_id "XLOC_006363"; transcript_id "TCONS_00010878"; exon_number |  |
| "3"; oId "CUFF.12588.1"; tss_id "TSS8066"; |   |   |   |                                                                    |  |



|       |                         |           |   |   |   |                                                                                                               |
|-------|-------------------------|-----------|---|---|---|---------------------------------------------------------------------------------------------------------------|
| chr10 | Cufflinks exon112874085 | 112874174 | . | + | . | gene_id "XLOC_006433"; transcript_id "TCONS_00010999"; exon_number "1"; oId "CUFF.12803.1"; tss_id "TSS8164"; |
| chr10 | Cufflinks exon112877718 | 112877857 | . | + | . | gene_id "XLOC_006433"; transcript_id "TCONS_00010999"; exon_number "2"; oId "CUFF.12803.1"; tss_id "TSS8164"; |
| chr10 | Cufflinks exon119098643 | 119098670 | . | + | . | gene_id "XLOC_006495"; transcript_id "TCONS_00011092"; exon_number "1"; oId "CUFF.12974.1"; tss_id "TSS8238"; |
| chr10 | Cufflinks exon119258298 | 119259908 | . | + | . | gene_id "XLOC_006495"; transcript_id "TCONS_00011092"; exon_number "2"; oId "CUFF.12974.1"; tss_id "TSS8238"; |
| chr10 | Cufflinks exon119184713 | 119184863 | . | + | . | gene_id "XLOC_006495"; transcript_id "TCONS_00011095"; exon_number "1"; oId "CUFF.12974.3"; tss_id "TSS8239"; |
| chr10 | Cufflinks exon119195727 | 119195835 | . | + | . | gene_id "XLOC_006495"; transcript_id "TCONS_00011095"; exon_number "2"; oId "CUFF.12974.3"; tss_id "TSS8239"; |
| chr10 | Cufflinks exon119249673 | 119252574 | . | + | . | gene_id "XLOC_006495"; transcript_id "TCONS_00011095"; exon_number "3"; oId "CUFF.12974.3"; tss_id "TSS8239"; |
| chr10 | Cufflinks exon119184713 | 119184863 | . | + | . | gene_id "XLOC_006495"; transcript_id "TCONS_00011096"; exon_number "1"; oId "CUFF.12974.2"; tss_id "TSS8239"; |
| chr10 | Cufflinks exon119195727 | 119195835 | . | + | . | gene_id "XLOC_006495"; transcript_id "TCONS_00011096"; exon_number "2"; oId "CUFF.12974.2"; tss_id "TSS8239"; |
| chr10 | Cufflinks exon119249673 | 119249945 | . | + | . | gene_id "XLOC_006495"; transcript_id "TCONS_00011096"; exon_number "3"; oId "CUFF.12974.2"; tss_id "TSS8239"; |
| chr10 | Cufflinks exon119256134 | 119256578 | . | + | . | gene_id "XLOC_006495"; transcript_id "TCONS_00011096"; exon_number "4"; oId "CUFF.12974.2"; tss_id "TSS8239"; |
| chr10 | Cufflinks exon119269941 | 119274034 | . | + | . | gene_id "XLOC_006495"; transcript_id "TCONS_00011096"; exon_number "5"; oId "CUFF.12974.2"; tss_id "TSS8239"; |
| chr10 | Cufflinks exon119184718 | 119184863 | . | + | . | gene_id "XLOC_006495"; transcript_id "TCONS_00011097"; exon_number "1"; oId "CUFF.12974.5"; tss_id "TSS8239"; |
| chr10 | Cufflinks exon119195727 | 119195835 | . | + | . | gene_id "XLOC_006495"; transcript_id "TCONS_00011097"; exon_number "2"; oId "CUFF.12974.5"; tss_id "TSS8239"; |
| chr10 | Cufflinks exon119236697 | 119236785 | . | + | . | gene_id "XLOC_006495"; transcript_id "TCONS_00011097"; exon_number "3"; oId "CUFF.12974.5"; tss_id "TSS8239"; |
| chr10 | Cufflinks exon119249673 | 119252574 | . | + | . | gene_id "XLOC_006495"; transcript_id "TCONS_00011097"; exon_number "4"; oId "CUFF.12974.5"; tss_id "TSS8239"; |
| chr10 | Cufflinks exon119184718 | 119184863 | . | + | . | gene_id "XLOC_006495"; transcript_id "TCONS_00011098"; exon_number "1"; oId "CUFF.12974.4"; tss_id "TSS8239"; |
| chr10 | Cufflinks exon119195727 | 119195835 | . | + | . | gene_id "XLOC_006495"; transcript_id "TCONS_00011098"; exon_number "2"; oId "CUFF.12974.4"; tss_id "TSS8239"; |
| chr10 | Cufflinks exon119256134 | 119259908 | . | + | . | gene_id "XLOC_006495"; transcript_id "TCONS_00011098"; exon_number "3"; oId "CUFF.12974.4"; tss_id "TSS8239"; |
| chr10 | Cufflinks exon119185000 | 119185029 | . | + | . | gene_id "XLOC_006495"; transcript_id "TCONS_00011099"; exon_number "1"; oId "CUFF.12974.6"; tss_id "TSS8240"; |
| chr10 | Cufflinks exon119195727 | 119195835 | . | + | . | gene_id "XLOC_006495"; transcript_id "TCONS_00011099"; exon_number "2"; oId "CUFF.12974.6"; tss_id "TSS8240"; |
| chr10 | Cufflinks exon119256134 | 119259908 | . | + | . | gene_id "XLOC_006495"; transcript_id "TCONS_00011099"; exon_number "3"; oId "CUFF.12974.6"; tss_id "TSS8240"; |

|                                            |   |   |   |                                                                    |  |
|--------------------------------------------|---|---|---|--------------------------------------------------------------------|--|
| "3"; oId "CUFF.12974.6"; tss_id "TSS8240"; |   |   |   |                                                                    |  |
| chr10 Cufflinks exon119210357 119210396    | . | + | . | gene_id "XLOC_006498"; transcript_id "TCONS_00011100"; exon_number |  |
| "1"; oId "CUFF.12979.1"; tss_id "TSS8243"; |   |   |   |                                                                    |  |
| chr10 Cufflinks exon119211272 119211578    | . | + | . | gene_id "XLOC_006498"; transcript_id "TCONS_00011100"; exon_number |  |
| "2"; oId "CUFF.12979.1"; tss_id "TSS8243"; |   |   |   |                                                                    |  |
| chr10 Cufflinks exon129979273 129979420    | . | + | . | gene_id "XLOC_006608"; transcript_id "TCONS_00011270"; exon_number |  |
| "1"; oId "CUFF.13327.2"; tss_id "TSS8374"; |   |   |   |                                                                    |  |
| chr10 Cufflinks exon130084216 130084289    | . | + | . | gene_id "XLOC_006608"; transcript_id "TCONS_00011270"; exon_number |  |
| "2"; oId "CUFF.13327.2"; tss_id "TSS8374"; |   |   |   |                                                                    |  |
| chr10 Cufflinks exon130085587 130085777    | . | + | . | gene_id "XLOC_006608"; transcript_id "TCONS_00011270"; exon_number |  |
| "3"; oId "CUFF.13327.2"; tss_id "TSS8374"; |   |   |   |                                                                    |  |
| chr10 Cufflinks exon130104305 130105687    | . | + | . | gene_id "XLOC_006608"; transcript_id "TCONS_00011270"; exon_number |  |
| "4"; oId "CUFF.13327.2"; tss_id "TSS8374"; |   |   |   |                                                                    |  |
| chr10 Cufflinks exon130105889 130107104    | . | + | . | gene_id "XLOC_006608"; transcript_id "TCONS_00011270"; exon_number |  |
| "5"; oId "CUFF.13327.2"; tss_id "TSS8374"; |   |   |   |                                                                    |  |
| chr10 Cufflinks exon130109381 130112861    | . | + | . | gene_id "XLOC_006608"; transcript_id "TCONS_00011270"; exon_number |  |
| "6"; oId "CUFF.13327.2"; tss_id "TSS8374"; |   |   |   |                                                                    |  |
| chr10 Cufflinks exon130113457 130113745    | . | + | . | gene_id "XLOC_006608"; transcript_id "TCONS_00011270"; exon_number |  |
| "7"; oId "CUFF.13327.2"; tss_id "TSS8374"; |   |   |   |                                                                    |  |
| chr10 Cufflinks exon130115187 130122670    | . | + | . | gene_id "XLOC_006608"; transcript_id "TCONS_00011270"; exon_number |  |
| "8"; oId "CUFF.13327.2"; tss_id "TSS8374"; |   |   |   |                                                                    |  |
| chr10 Cufflinks exon129979273 129979476    | . | + | . | gene_id "XLOC_006608"; transcript_id "TCONS_00011269"; exon_number |  |
| "1"; oId "CUFF.13327.1"; tss_id "TSS8374"; |   |   |   |                                                                    |  |
| chr10 Cufflinks exon130104305 130104629    | . | + | . | gene_id "XLOC_006608"; transcript_id "TCONS_00011269"; exon_number |  |
| "2"; oId "CUFF.13327.1"; tss_id "TSS8374"; |   |   |   |                                                                    |  |
| chr10 Cufflinks exon130105352 130105392    | . | + | . | gene_id "XLOC_006608"; transcript_id "TCONS_00011269"; exon_number |  |
| "3"; oId "CUFF.13327.1"; tss_id "TSS8374"; |   |   |   |                                                                    |  |
| chr10 Cufflinks exon130105613 130105687    | . | + | . | gene_id "XLOC_006608"; transcript_id "TCONS_00011269"; exon_number |  |
| "4"; oId "CUFF.13327.1"; tss_id "TSS8374"; |   |   |   |                                                                    |  |
| chr10 Cufflinks exon130105889 130106001    | . | + | . | gene_id "XLOC_006608"; transcript_id "TCONS_00011269"; exon_number |  |
| "5"; oId "CUFF.13327.1"; tss_id "TSS8374"; |   |   |   |                                                                    |  |
| chr10 Cufflinks exon130112693 130113745    | . | + | . | gene_id "XLOC_006608"; transcript_id "TCONS_00011269"; exon_number |  |
| "6"; oId "CUFF.13327.1"; tss_id "TSS8374"; |   |   |   |                                                                    |  |
| chr10 Cufflinks exon130115187 130122670    | . | + | . | gene_id "XLOC_006608"; transcript_id "TCONS_00011269"; exon_number |  |
| "7"; oId "CUFF.13327.1"; tss_id "TSS8374"; |   |   |   |                                                                    |  |
| chr10 Cufflinks exon129979291 129979420    | . | + | . | gene_id "XLOC_006608"; transcript_id "TCONS_00011272"; exon_number |  |
| "1"; oId "CUFF.13327.4"; tss_id "TSS8374"; |   |   |   |                                                                    |  |
| chr10 Cufflinks exon130084216 130084289    | . | + | . | gene_id "XLOC_006608"; transcript_id "TCONS_00011272"; exon_number |  |
| "2"; oId "CUFF.13327.4"; tss_id "TSS8374"; |   |   |   |                                                                    |  |
| chr10 Cufflinks exon130085587 130085777    | . | + | . | gene_id "XLOC_006608"; transcript_id "TCONS_00011272"; exon_number |  |
| "3"; oId "CUFF.13327.4"; tss_id "TSS8374"; |   |   |   |                                                                    |  |
| chr10 Cufflinks exon130104305 130105392    | . | + | . | gene_id "XLOC_006608"; transcript_id "TCONS_00011272"; exon_number |  |
| "4"; oId "CUFF.13327.4"; tss_id "TSS8374"; |   |   |   |                                                                    |  |

|       |                |           |           |   |   |   |                                                                                                               |
|-------|----------------|-----------|-----------|---|---|---|---------------------------------------------------------------------------------------------------------------|
| chr10 | Cufflinks exon | 130105613 | 130105786 | . | + | . | gene_id "XLOC_006608"; transcript_id "TCONS_00011272"; exon_number "5"; oId "CUFF.13327.4"; tss_id "TSS8374"; |
| chr10 | Cufflinks exon | 130112693 | 130112861 | . | + | . | gene_id "XLOC_006608"; transcript_id "TCONS_00011272"; exon_number "6"; oId "CUFF.13327.4"; tss_id "TSS8374"; |
| chr10 | Cufflinks exon | 130113457 | 130113745 | . | + | . | gene_id "XLOC_006608"; transcript_id "TCONS_00011272"; exon_number "7"; oId "CUFF.13327.4"; tss_id "TSS8374"; |
| chr10 | Cufflinks exon | 130115187 | 130122670 | . | + | . | gene_id "XLOC_006608"; transcript_id "TCONS_00011272"; exon_number "8"; oId "CUFF.13327.4"; tss_id "TSS8374"; |
| chr10 | Cufflinks exon | 129979291 | 129979420 | . | + | . | gene_id "XLOC_006608"; transcript_id "TCONS_00011271"; exon_number "1"; oId "CUFF.13327.3"; tss_id "TSS8374"; |
| chr10 | Cufflinks exon | 130084216 | 130084289 | . | + | . | gene_id "XLOC_006608"; transcript_id "TCONS_00011271"; exon_number "2"; oId "CUFF.13327.3"; tss_id "TSS8374"; |
| chr10 | Cufflinks exon | 130085587 | 130085777 | . | + | . | gene_id "XLOC_006608"; transcript_id "TCONS_00011271"; exon_number "3"; oId "CUFF.13327.3"; tss_id "TSS8374"; |
| chr10 | Cufflinks exon | 130104305 | 130105687 | . | + | . | gene_id "XLOC_006608"; transcript_id "TCONS_00011271"; exon_number "4"; oId "CUFF.13327.3"; tss_id "TSS8374"; |
| chr10 | Cufflinks exon | 130105889 | 130106001 | . | + | . | gene_id "XLOC_006608"; transcript_id "TCONS_00011271"; exon_number "5"; oId "CUFF.13327.3"; tss_id "TSS8374"; |
| chr10 | Cufflinks exon | 130113683 | 130113745 | . | + | . | gene_id "XLOC_006608"; transcript_id "TCONS_00011271"; exon_number "6"; oId "CUFF.13327.3"; tss_id "TSS8374"; |
| chr10 | Cufflinks exon | 130115187 | 130122670 | . | + | . | gene_id "XLOC_006608"; transcript_id "TCONS_00011271"; exon_number "7"; oId "CUFF.13327.3"; tss_id "TSS8374"; |
| chr10 | Cufflinks exon | 129979338 | 129979420 | . | + | . | gene_id "XLOC_006608"; transcript_id "TCONS_00011273"; exon_number "1"; oId "CUFF.13327.5"; tss_id "TSS8374"; |
| chr10 | Cufflinks exon | 130104305 | 130104506 | . | + | . | gene_id "XLOC_006608"; transcript_id "TCONS_00011273"; exon_number "2"; oId "CUFF.13327.5"; tss_id "TSS8374"; |
| chr10 | Cufflinks exon | 130105613 | 130105786 | . | + | . | gene_id "XLOC_006608"; transcript_id "TCONS_00011273"; exon_number "3"; oId "CUFF.13327.5"; tss_id "TSS8374"; |
| chr10 | Cufflinks exon | 130112693 | 130112861 | . | + | . | gene_id "XLOC_006608"; transcript_id "TCONS_00011273"; exon_number "4"; oId "CUFF.13327.5"; tss_id "TSS8374"; |
| chr10 | Cufflinks exon | 130113457 | 130114400 | . | + | . | gene_id "XLOC_006608"; transcript_id "TCONS_00011273"; exon_number "5"; oId "CUFF.13327.5"; tss_id "TSS8374"; |
| chr10 | Cufflinks exon | 130115187 | 130122670 | . | + | . | gene_id "XLOC_006608"; transcript_id "TCONS_00011273"; exon_number "6"; oId "CUFF.13327.5"; tss_id "TSS8374"; |
| chr10 | Cufflinks exon | 130084214 | 130084289 | . | + | . | gene_id "XLOC_006608"; transcript_id "TCONS_00011298"; exon_number "1"; oId "CUFF.13327.8"; tss_id "TSS8375"; |
| chr10 | Cufflinks exon | 130085587 | 130085777 | . | + | . | gene_id "XLOC_006608"; transcript_id "TCONS_00011298"; exon_number "2"; oId "CUFF.13327.8"; tss_id "TSS8375"; |
| chr10 | Cufflinks exon | 130104305 | 130105786 | . | + | . | gene_id "XLOC_006608"; transcript_id "TCONS_00011298"; exon_number "3"; oId "CUFF.13327.8"; tss_id "TSS8375"; |
| chr10 | Cufflinks exon | 130112693 | 130112861 | . | + | . | gene_id "XLOC_006608"; transcript_id "TCONS_00011298"; exon_number "4"; oId "CUFF.13327.8"; tss_id "TSS8375"; |
| chr10 | Cufflinks exon | 130113457 | 130113745 | . | + | . | gene_id "XLOC_006608"; transcript_id "TCONS_00011298"; exon_number "5"; oId "CUFF.13327.8"; tss_id "TSS8375"; |

"5"; oId "CUFF.13327.8"; tss\_id "TSS8375";  
chr10 Cufflinks exon130115187 130122670 . + . gene\_id "XLOC\_006608"; transcript\_id "TCONS\_00011298"; exon\_number  
"6"; oId "CUFF.13327.8"; tss\_id "TSS8375";  
chr10 Cufflinks exon130084214 130084289 . + . gene\_id "XLOC\_006608"; transcript\_id "TCONS\_00011297"; exon\_number  
"1"; oId "CUFF.13327.7"; tss\_id "TSS8375";  
chr10 Cufflinks exon130085587 130085777 . + . gene\_id "XLOC\_006608"; transcript\_id "TCONS\_00011297"; exon\_number  
"2"; oId "CUFF.13327.7"; tss\_id "TSS8375";  
chr10 Cufflinks exon130104305 130104506 . + . gene\_id "XLOC\_006608"; transcript\_id "TCONS\_00011297"; exon\_number  
"3"; oId "CUFF.13327.7"; tss\_id "TSS8375";  
chr10 Cufflinks exon130105613 130105786 . + . gene\_id "XLOC\_006608"; transcript\_id "TCONS\_00011297"; exon\_number  
"4"; oId "CUFF.13327.7"; tss\_id "TSS8375";  
chr10 Cufflinks exon130112693 130112861 . + . gene\_id "XLOC\_006608"; transcript\_id "TCONS\_00011297"; exon\_number  
"5"; oId "CUFF.13327.7"; tss\_id "TSS8375";  
chr10 Cufflinks exon130113457 130113745 . + . gene\_id "XLOC\_006608"; transcript\_id "TCONS\_00011297"; exon\_number  
"6"; oId "CUFF.13327.7"; tss\_id "TSS8375";  
chr10 Cufflinks exon130115187 130122670 . + . gene\_id "XLOC\_006608"; transcript\_id "TCONS\_00011297"; exon\_number  
"7"; oId "CUFF.13327.7"; tss\_id "TSS8375";  
chr10 Cufflinks exon130084214 130084289 . + . gene\_id "XLOC\_006608"; transcript\_id "TCONS\_00011296"; exon\_number  
"1"; oId "CUFF.13327.6"; tss\_id "TSS8375";  
chr10 Cufflinks exon130085587 130085777 . + . gene\_id "XLOC\_006608"; transcript\_id "TCONS\_00011296"; exon\_number  
"2"; oId "CUFF.13327.6"; tss\_id "TSS8375";  
chr10 Cufflinks exon130104305 130105393 . + . gene\_id "XLOC\_006608"; transcript\_id "TCONS\_00011296"; exon\_number  
"3"; oId "CUFF.13327.6"; tss\_id "TSS8375";  
chr10 Cufflinks exon130105613 130105786 . + . gene\_id "XLOC\_006608"; transcript\_id "TCONS\_00011296"; exon\_number  
"4"; oId "CUFF.13327.6"; tss\_id "TSS8375";  
chr10 Cufflinks exon130112693 130112861 . + . gene\_id "XLOC\_006608"; transcript\_id "TCONS\_00011296"; exon\_number  
"5"; oId "CUFF.13327.6"; tss\_id "TSS8375";  
chr10 Cufflinks exon130113457 130113745 . + . gene\_id "XLOC\_006608"; transcript\_id "TCONS\_00011296"; exon\_number  
"6"; oId "CUFF.13327.6"; tss\_id "TSS8375";  
chr10 Cufflinks exon130115187 130122670 . + . gene\_id "XLOC\_006608"; transcript\_id "TCONS\_00011296"; exon\_number  
"7"; oId "CUFF.13327.6"; tss\_id "TSS8375";  
chr10 Cufflinks exon130704915 130704962 . + . gene\_id "XLOC\_006637"; transcript\_id "TCONS\_00011305"; exon\_number  
"1"; oId "CUFF.13386.1"; tss\_id "TSS8404";  
chr10 Cufflinks exon130710223 130710346 . + . gene\_id "XLOC\_006637"; transcript\_id "TCONS\_00011305"; exon\_number  
"2"; oId "CUFF.13386.1"; tss\_id "TSS8404";  
chr10 Cufflinks exon130713023 130721192 . + . gene\_id "XLOC\_006637"; transcript\_id "TCONS\_00011305"; exon\_number  
"3"; oId "CUFF.13386.1"; tss\_id "TSS8404";  
chr10 Cufflinks exon130710379 130711568 . + . gene\_id "XLOC\_006637"; transcript\_id "TCONS\_00011307"; exon\_number  
"1"; oId "CUFF.13386.3"; tss\_id "TSS8405";  
chr10 Cufflinks exon130712637 130712669 . + . gene\_id "XLOC\_006637"; transcript\_id "TCONS\_00011307"; exon\_number  
"2"; oId "CUFF.13386.3"; tss\_id "TSS8405";  
chr10 Cufflinks exon130713023 130721192 . + . gene\_id "XLOC\_006637"; transcript\_id "TCONS\_00011307"; exon\_number  
"3"; oId "CUFF.13386.3"; tss\_id "TSS8405";

|       |                |           |           |   |   |   |                                                                                                               |
|-------|----------------|-----------|-----------|---|---|---|---------------------------------------------------------------------------------------------------------------|
| chr10 | Cufflinks exon | 130710379 | 130712669 | . | + | . | gene_id "XLOC_006637"; transcript_id "TCONS_00011306"; exon_number "1"; oId "CUFF.13386.2"; tss_id "TSS8405"; |
| chr10 | Cufflinks exon | 130713023 | 130721192 | . | + | . | gene_id "XLOC_006637"; transcript_id "TCONS_00011306"; exon_number "2"; oId "CUFF.13386.2"; tss_id "TSS8405"; |
| chr10 | Cufflinks exon | 131578385 | 131583570 | . | + | . | gene_id "XLOC_006639"; transcript_id "TCONS_00011318"; exon_number "1"; oId "CUFF.13395.7"; tss_id "TSS8408"; |
| chr10 | Cufflinks exon | 131590173 | 131590298 | . | + | . | gene_id "XLOC_006639"; transcript_id "TCONS_00011318"; exon_number "2"; oId "CUFF.13395.7"; tss_id "TSS8408"; |
| chr10 | Cufflinks exon | 131597930 | 131598712 | . | + | . | gene_id "XLOC_006639"; transcript_id "TCONS_00011318"; exon_number "3"; oId "CUFF.13395.7"; tss_id "TSS8408"; |
| chr10 | Cufflinks exon | 131578385 | 131582816 | . | + | . | gene_id "XLOC_006639"; transcript_id "TCONS_00011319"; exon_number "1"; oId "CUFF.13395.9"; tss_id "TSS8408"; |
| chr10 | Cufflinks exon | 131583213 | 131583570 | . | + | . | gene_id "XLOC_006639"; transcript_id "TCONS_00011319"; exon_number "2"; oId "CUFF.13395.9"; tss_id "TSS8408"; |
| chr10 | Cufflinks exon | 131590173 | 131590298 | . | + | . | gene_id "XLOC_006639"; transcript_id "TCONS_00011319"; exon_number "3"; oId "CUFF.13395.9"; tss_id "TSS8408"; |
| chr10 | Cufflinks exon | 131597930 | 131598116 | . | + | . | gene_id "XLOC_006639"; transcript_id "TCONS_00011319"; exon_number "4"; oId "CUFF.13395.9"; tss_id "TSS8408"; |
| chr10 | Cufflinks exon | 131598864 | 131599976 | . | + | . | gene_id "XLOC_006639"; transcript_id "TCONS_00011319"; exon_number "5"; oId "CUFF.13395.9"; tss_id "TSS8408"; |
| chr10 | Cufflinks exon | 131601054 | 131601155 | . | + | . | gene_id "XLOC_006639"; transcript_id "TCONS_00011319"; exon_number "6"; oId "CUFF.13395.9"; tss_id "TSS8408"; |
| chr10 | Cufflinks exon | 131605181 | 131605343 | . | + | . | gene_id "XLOC_006639"; transcript_id "TCONS_00011319"; exon_number "7"; oId "CUFF.13395.9"; tss_id "TSS8408"; |
| chr10 | Cufflinks exon | 131611987 | 131612057 | . | + | . | gene_id "XLOC_006639"; transcript_id "TCONS_00011319"; exon_number "8"; oId "CUFF.13395.9"; tss_id "TSS8408"; |
| chr10 | Cufflinks exon | 131619786 | 131619898 | . | + | . | gene_id "XLOC_006639"; transcript_id "TCONS_00011319"; exon_number "9"; oId "CUFF.13395.9"; tss_id "TSS8408"; |
| chr10 | Cufflinks exon | 131571607 | 131572517 | . | + | . | gene_id "XLOC_006642"; transcript_id "TCONS_00011316"; exon_number "1"; oId "CUFF.13398.1"; tss_id "TSS8411"; |
| chr10 | Cufflinks exon | 131575467 | 131578309 | . | + | . | gene_id "XLOC_006642"; transcript_id "TCONS_00011316"; exon_number "2"; oId "CUFF.13398.1"; tss_id "TSS8411"; |
| chr10 | Cufflinks exon | 134268703 | 134269029 | . | + | . | gene_id "XLOC_006690"; transcript_id "TCONS_00011397"; exon_number "1"; oId "CUFF.13532.1"; tss_id "TSS8473"; |
| chr10 | Cufflinks exon | 134275682 | 134275725 | . | + | . | gene_id "XLOC_006690"; transcript_id "TCONS_00011397"; exon_number "2"; oId "CUFF.13532.1"; tss_id "TSS8473"; |
| chr10 | Cufflinks exon | 135255792 | 135257298 | . | + | . | gene_id "XLOC_006710"; transcript_id "TCONS_00011427"; exon_number "1"; oId "CUFF.13603.1"; tss_id "TSS8494"; |
| chr10 | Cufflinks exon | 135257359 | 135257654 | . | + | . | gene_id "XLOC_006710"; transcript_id "TCONS_00011427"; exon_number "2"; oId "CUFF.13603.1"; tss_id "TSS8494"; |
| chr10 | Cufflinks exon | 135257838 | 135258964 | . | + | . | gene_id "XLOC_006710"; transcript_id "TCONS_00011427"; exon_number "3"; oId "CUFF.13603.1"; tss_id "TSS8494"; |
| chr10 | Cufflinks exon | 135284418 | 135286152 | . | + | . | gene_id "XLOC_006716"; transcript_id "TCONS_00011433"; exon_number                                            |

"1"; oId "CUFF.13615.1"; tss\_id "TSS8500";  
chr10 Cufflinks exon135286189 135286764 . + . gene\_id "XLOC\_006716"; transcript\_id "TCONS\_00011433"; exon\_number  
"2"; oId "CUFF.13615.1"; tss\_id "TSS8500";  
chr10 Cufflinks exon3107391 3108584 . - . gene\_id "XLOC\_006773"; transcript\_id "TCONS\_00011517"; exon\_number "1"; oId  
"CUFF.9623.3"; tss\_id "TSS8569";  
chr10 Cufflinks exon3108945 3109184 . - . gene\_id "XLOC\_006773"; transcript\_id "TCONS\_00011517"; exon\_number "2"; oId  
"CUFF.9623.3"; tss\_id "TSS8569";  
chr10 Cufflinks exon3107391 3108582 . - . gene\_id "XLOC\_006773"; transcript\_id "TCONS\_00011519"; exon\_number "1"; oId  
"CUFF.9623.1"; tss\_id "TSS8570";  
chr10 Cufflinks exon 3108945 3109498 . - . gene\_id "XLOC\_006773"; transcript\_id "TCONS\_00011519"; exon\_number "2"; oId  
"CUFF.9623.1"; tss\_id "TSS8570";  
chr10 Cufflinks exon 4021046 4022714 . - . gene\_id "XLOC\_006777"; transcript\_id "TCONS\_00011530"; exon\_number "1"; oId  
"CUFF.9632.1"; tss\_id "TSS8575";  
chr10 Cufflinks exon 4023474 4023688 . - . gene\_id "XLOC\_006777"; transcript\_id "TCONS\_00011530"; exon\_number "2"; oId  
"CUFF.9632.1"; tss\_id "TSS8575";  
chr10 Cufflinks exon 5307070 5308648 . - . gene\_id "XLOC\_006783"; transcript\_id "TCONS\_00011539"; exon\_number "1"; oId  
"CUFF.9659.5"; tss\_id "TSS8582";  
chr10 Cufflinks exon 5313161 5314480 . - . gene\_id "XLOC\_006783"; transcript\_id "TCONS\_00011539"; exon\_number "2"; oId  
"CUFF.9659.5"; tss\_id "TSS8582";  
chr10 Cufflinks exon 5636948 5637542 . - . gene\_id "XLOC\_006792"; transcript\_id "TCONS\_00011553"; exon\_number "1"; oId  
"CUFF.9679.1"; tss\_id "TSS8592";  
chr10 Cufflinks exon 5637974 5638062 . - . gene\_id "XLOC\_006792"; transcript\_id "TCONS\_00011553"; exon\_number "2"; oId  
"CUFF.9679.1"; tss\_id "TSS8592";  
chr10 Cufflinks exon 5643909 5644122 . - . gene\_id "XLOC\_006792"; transcript\_id "TCONS\_00011553"; exon\_number "3"; oId  
"CUFF.9679.1"; tss\_id "TSS8592";  
chr10 Cufflinks exon 8092413 8093541 . - . gene\_id "XLOC\_006834"; transcript\_id "TCONS\_00011627"; exon\_number "1"; oId  
"CUFF.9815.1"; tss\_id "TSS8646";  
chr10 Cufflinks exon 8094363 8095447 . - . gene\_id "XLOC\_006834"; transcript\_id "TCONS\_00011627"; exon\_number "2"; oId  
"CUFF.9815.1"; tss\_id "TSS8646";  
chr10 Cufflinks exon 8094206 8094698 . - . gene\_id "XLOC\_006834"; transcript\_id "TCONS\_00011628"; exon\_number "1"; oId  
"CUFF.9815.2"; tss\_id "TSS8646";  
chr10 Cufflinks exon 8095149 8095385 . - . gene\_id "XLOC\_006834"; transcript\_id "TCONS\_00011628"; exon\_number "2"; oId  
"CUFF.9815.2"; tss\_id "TSS8646";  
chr10 Cufflinks exon 8094206 8094698 . - . gene\_id "XLOC\_006834"; transcript\_id "TCONS\_00011629"; exon\_number "1"; oId  
"CUFF.9815.3"; tss\_id "TSS8646";  
chr10 Cufflinks exon 8095086 8095412 . - . gene\_id "XLOC\_006834"; transcript\_id "TCONS\_00011629"; exon\_number "2"; oId  
"CUFF.9815.3"; tss\_id "TSS8646";  
chr10 Cufflinks exon 11358796 11361173 . - . gene\_id "XLOC\_006838"; transcript\_id "TCONS\_00011633";  
exon\_number "1"; oId "CUFF.9839.1"; tss\_id "TSS8650";  
chr10 Cufflinks exon 11365533 11365630 . - . gene\_id "XLOC\_006838"; transcript\_id "TCONS\_00011633";  
exon\_number "2"; oId "CUFF.9839.1"; tss\_id "TSS8650";  
chr10 Cufflinks exon 11386577 11386673 . - . gene\_id "XLOC\_006838"; transcript\_id "TCONS\_00011633";  
exon\_number "3"; oId "CUFF.9839.1"; tss\_id "TSS8650";

|                  |                    |                   |          |   |   |   |                                                        |
|------------------|--------------------|-------------------|----------|---|---|---|--------------------------------------------------------|
| chr10 Cufflinks  | exon               | 11887460          | 11893755 | . | - | . | gene_id "XLOC_006844"; transcript_id "TCONS_00011648"; |
| exon_number "1"; | oId "CUFF.9856.4"; | tss_id "TSS8661"; |          |   |   |   |                                                        |
| chr10 Cufflinks  | exon               | 11899264          | 11899384 | . | - | . | gene_id "XLOC_006844"; transcript_id "TCONS_00011648"; |
| exon_number "2"; | oId "CUFF.9856.4"; | tss_id "TSS8661"; |          |   |   |   |                                                        |
| chr10 Cufflinks  | exon               | 11904816          | 11904929 | . | - | . | gene_id "XLOC_006844"; transcript_id "TCONS_00011648"; |
| exon_number "3"; | oId "CUFF.9856.4"; | tss_id "TSS8661"; |          |   |   |   |                                                        |
| chr10 Cufflinks  | exon               | 11911365          | 11911500 | . | - | . | gene_id "XLOC_006844"; transcript_id "TCONS_00011648"; |
| exon_number "4"; | oId "CUFF.9856.4"; | tss_id "TSS8661"; |          |   |   |   |                                                        |
| chr10 Cufflinks  | exon               | 11936181          | 11936709 | . | - | . | gene_id "XLOC_006844"; transcript_id "TCONS_00011648"; |
| exon_number "5"; | oId "CUFF.9856.4"; | tss_id "TSS8661"; |          |   |   |   |                                                        |
| chr10 Cufflinks  | exon               | 11887460          | 11893755 | . | - | . | gene_id "XLOC_006844"; transcript_id "TCONS_00011647"; |
| exon_number "1"; | oId "CUFF.9856.3"; | tss_id "TSS8661"; |          |   |   |   |                                                        |
| chr10 Cufflinks  | exon               | 11899264          | 11899385 | . | - | . | gene_id "XLOC_006844"; transcript_id "TCONS_00011647"; |
| exon_number "2"; | oId "CUFF.9856.3"; | tss_id "TSS8661"; |          |   |   |   |                                                        |
| chr10 Cufflinks  | exon               | 11904816          | 11904929 | . | - | . | gene_id "XLOC_006844"; transcript_id "TCONS_00011647"; |
| exon_number "3"; | oId "CUFF.9856.3"; | tss_id "TSS8661"; |          |   |   |   |                                                        |
| chr10 Cufflinks  | exon               | 11911365          | 11911500 | . | - | . | gene_id "XLOC_006844"; transcript_id "TCONS_00011647"; |
| exon_number "4"; | oId "CUFF.9856.3"; | tss_id "TSS8661"; |          |   |   |   |                                                        |
| chr10 Cufflinks  | exon               | 11929846          | 11929952 | . | - | . | gene_id "XLOC_006844"; transcript_id "TCONS_00011647"; |
| exon_number "5"; | oId "CUFF.9856.3"; | tss_id "TSS8661"; |          |   |   |   |                                                        |
| chr10 Cufflinks  | exon               | 11936181          | 11936709 | . | - | . | gene_id "XLOC_006844"; transcript_id "TCONS_00011647"; |
| exon_number "6"; | oId "CUFF.9856.3"; | tss_id "TSS8661"; |          |   |   |   |                                                        |
| chr10 Cufflinks  | exon               | 11887460          | 11893755 | . | - | . | gene_id "XLOC_006844"; transcript_id "TCONS_00011646"; |
| exon_number "1"; | oId "CUFF.9856.1"; | tss_id "TSS8661"; |          |   |   |   |                                                        |
| chr10 Cufflinks  | exon               | 11899264          | 11899384 | . | - | . | gene_id "XLOC_006844"; transcript_id "TCONS_00011646"; |
| exon_number "2"; | oId "CUFF.9856.1"; | tss_id "TSS8661"; |          |   |   |   |                                                        |
| chr10 Cufflinks  | exon               | 11904816          | 11904929 | . | - | . | gene_id "XLOC_006844"; transcript_id "TCONS_00011646"; |
| exon_number "3"; | oId "CUFF.9856.1"; | tss_id "TSS8661"; |          |   |   |   |                                                        |
| chr10 Cufflinks  | exon               | 11911365          | 11911500 | . | - | . | gene_id "XLOC_006844"; transcript_id "TCONS_00011646"; |
| exon_number "4"; | oId "CUFF.9856.1"; | tss_id "TSS8661"; |          |   |   |   |                                                        |
| chr10 Cufflinks  | exon               | 11929846          | 11929952 | . | - | . | gene_id "XLOC_006844"; transcript_id "TCONS_00011646"; |
| exon_number "5"; | oId "CUFF.9856.1"; | tss_id "TSS8661"; |          |   |   |   |                                                        |
| chr10 Cufflinks  | exon               | 11936181          | 11936709 | . | - | . | gene_id "XLOC_006844"; transcript_id "TCONS_00011646"; |
| exon_number "6"; | oId "CUFF.9856.1"; | tss_id "TSS8661"; |          |   |   |   |                                                        |
| chr10 Cufflinks  | exon               | 11887460          | 11893755 | . | - | . | gene_id "XLOC_006844"; transcript_id "TCONS_00011649"; |
| exon_number "1"; | oId "CUFF.9856.5"; | tss_id "TSS8662"; |          |   |   |   |                                                        |
| chr10 Cufflinks  | exon               | 11899264          | 11899576 | . | - | . | gene_id "XLOC_006844"; transcript_id "TCONS_00011649"; |
| exon_number "2"; | oId "CUFF.9856.5"; | tss_id "TSS8662"; |          |   |   |   |                                                        |
| chr10 Cufflinks  | exon               | 11904816          | 11904929 | . | - | . | gene_id "XLOC_006844"; transcript_id "TCONS_00011649"; |
| exon_number "3"; | oId "CUFF.9856.5"; | tss_id "TSS8662"; |          |   |   |   |                                                        |
| chr10 Cufflinks  | exon               | 11911365          | 11911500 | . | - | . | gene_id "XLOC_006844"; transcript_id "TCONS_00011649"; |
| exon_number "4"; | oId "CUFF.9856.5"; | tss_id "TSS8662"; |          |   |   |   |                                                        |
| chr10 Cufflinks  | exon               | 11936181          | 11936912 | . | - | . | gene_id "XLOC_006844"; transcript_id "TCONS_00011649"; |

exon\_number "5"; oId "CUFF.9856.5"; tss\_id "TSS8662";  
 chr10 Cufflinks exon 11925853 11929956 . - . gene\_id "XLOC\_006844"; transcript\_id "TCONS\_00011655";  
 exon\_number "1"; oId "CUFF.9856.7"; tss\_id "TSS8662";  
 chr10 Cufflinks exon 11936181 11936912 . - . gene\_id "XLOC\_006844"; transcript\_id "TCONS\_00011655";  
 exon\_number "2"; oId "CUFF.9856.7"; tss\_id "TSS8662";  
 chr10 Cufflinks exon 11925853 11929952 . - . gene\_id "XLOC\_006844"; transcript\_id "TCONS\_00011654";  
 exon\_number "1"; oId "CUFF.9856.6"; tss\_id "TSS8662";  
 chr10 Cufflinks exon 11936181 11936912 . - . gene\_id "XLOC\_006844"; transcript\_id "TCONS\_00011654";  
 exon\_number "2"; oId "CUFF.9856.6"; tss\_id "TSS8662";  
 chr10 Cufflinks exon22724354 22726860 . - . gene\_id "XLOC\_006950"; transcript\_id "TCONS\_00011822"; exon\_number  
 "1"; oId "CUFF.10160.1"; tss\_id "TSS8801";  
 chr10 Cufflinks exon22730122 22730562 . - . gene\_id "XLOC\_006950"; transcript\_id "TCONS\_00011822"; exon\_number  
 "2"; oId "CUFF.10160.1"; tss\_id "TSS8801";  
 chr10 Cufflinks exon22764411 22767164 . - . gene\_id "XLOC\_006952"; transcript\_id "TCONS\_00011824"; exon\_number  
 "1"; oId "CUFF.10163.1"; tss\_id "TSS8803";  
 chr10 Cufflinks exon22768351 22768386 . - . gene\_id "XLOC\_006952"; transcript\_id "TCONS\_00011824"; exon\_number  
 "2"; oId "CUFF.10163.1"; tss\_id "TSS8803";  
 chr10 Cufflinks exon22764411 22767067 . - . gene\_id "XLOC\_006952"; transcript\_id "TCONS\_00011825"; exon\_number  
 "1"; oId "CUFF.10163.2"; tss\_id "TSS8803";  
 chr10 Cufflinks exon22768351 22768387 . - . gene\_id "XLOC\_006952"; transcript\_id "TCONS\_00011825"; exon\_number  
 "2"; oId "CUFF.10163.2"; tss\_id "TSS8803";  
 chr10 Cufflinks exon25098440 25101282 . - . gene\_id "XLOC\_006965"; transcript\_id "TCONS\_00011853"; exon\_number  
 "1"; oId "CUFF.10296.2"; tss\_id "TSS8827";  
 chr10 Cufflinks exon25102325 25102580 . - . gene\_id "XLOC\_006965"; transcript\_id "TCONS\_00011853"; exon\_number  
 "2"; oId "CUFF.10296.2"; tss\_id "TSS8827";  
 chr10 Cufflinks exon25400031 25400037 . - . gene\_id "XLOC\_006965"; transcript\_id "TCONS\_00011853"; exon\_number  
 "3"; oId "CUFF.10296.2"; tss\_id "TSS8827";  
 chr10 Cufflinks exon27245893 27246479 . - . gene\_id "XLOC\_006984"; transcript\_id "TCONS\_00011885"; exon\_number  
 "1"; oId "CUFF.10349.6"; tss\_id "TSS8848";  
 chr10 Cufflinks exon27255608 27255810 . - . gene\_id "XLOC\_006984"; transcript\_id "TCONS\_00011885"; exon\_number  
 "2"; oId "CUFF.10349.6"; tss\_id "TSS8848";  
 chr10 Cufflinks exon27257864 27257979 . - . gene\_id "XLOC\_006984"; transcript\_id "TCONS\_00011885"; exon\_number  
 "3"; oId "CUFF.10349.6"; tss\_id "TSS8848";  
 chr10 Cufflinks exon27258422 27258546 . - . gene\_id "XLOC\_006984"; transcript\_id "TCONS\_00011885"; exon\_number  
 "4"; oId "CUFF.10349.6"; tss\_id "TSS8848";  
 chr10 Cufflinks exon27260706 27260849 . - . gene\_id "XLOC\_006984"; transcript\_id "TCONS\_00011885"; exon\_number  
 "5"; oId "CUFF.10349.6"; tss\_id "TSS8848";  
 chr10 Cufflinks exon27245893 27246479 . - . gene\_id "XLOC\_006984"; transcript\_id "TCONS\_00011886"; exon\_number  
 "1"; oId "CUFF.10349.4"; tss\_id "TSS8849";  
 chr10 Cufflinks exon27255608 27255810 . - . gene\_id "XLOC\_006984"; transcript\_id "TCONS\_00011886"; exon\_number  
 "2"; oId "CUFF.10349.4"; tss\_id "TSS8849";  
 chr10 Cufflinks exon27257864 27257979 . - . gene\_id "XLOC\_006984"; transcript\_id "TCONS\_00011886"; exon\_number  
 "3"; oId "CUFF.10349.4"; tss\_id "TSS8849";



|       |                                            |          |          |   |   |   |                                                                    |
|-------|--------------------------------------------|----------|----------|---|---|---|--------------------------------------------------------------------|
| chr10 | Cufflinks exon                             | 27258422 | 27258546 | . | - | . | gene_id "XLOC_006984"; transcript_id "TCONS_00011886"; exon_number |
|       | "4"; oId "CUFF.10349.4"; tss_id "TSS8849"; |          |          |   |   |   |                                                                    |
| chr10 | Cufflinks exon                             | 27264895 | 27264919 | . | - | . | gene_id "XLOC_006984"; transcript_id "TCONS_00011886"; exon_number |
|       | "5"; oId "CUFF.10349.4"; tss_id "TSS8849"; |          |          |   |   |   |                                                                    |
| chr10 | Cufflinks exon                             | 31382970 | 31383777 | . | - | . | gene_id "XLOC_007016"; transcript_id "TCONS_00011958"; exon_number |
|       | "1"; oId "CUFF.10495.1"; tss_id "TSS8898"; |          |          |   |   |   |                                                                    |
| chr10 | Cufflinks exon                             | 31384801 | 31384922 | . | - | . | gene_id "XLOC_007016"; transcript_id "TCONS_00011958"; exon_number |
|       | "2"; oId "CUFF.10495.1"; tss_id "TSS8898"; |          |          |   |   |   |                                                                    |
| chr10 | Cufflinks exon                             | 31385027 | 31385220 | . | - | . | gene_id "XLOC_007016"; transcript_id "TCONS_00011958"; exon_number |
|       | "3"; oId "CUFF.10495.1"; tss_id "TSS8898"; |          |          |   |   |   |                                                                    |
| chr10 | Cufflinks exon                             | 31604281 | 31607469 | . | - | . | gene_id "XLOC_007026"; transcript_id "TCONS_00011970"; exon_number |
|       | "1"; oId "CUFF.10553.2"; tss_id "TSS8908"; |          |          |   |   |   |                                                                    |
| chr10 | Cufflinks exon                             | 31607825 | 31608024 | . | - | . | gene_id "XLOC_007026"; transcript_id "TCONS_00011970"; exon_number |
|       | "2"; oId "CUFF.10553.2"; tss_id "TSS8908"; |          |          |   |   |   |                                                                    |
| chr10 | Cufflinks exon                             | 38031805 | 38034476 | . | - | . | gene_id "XLOC_007056"; transcript_id "TCONS_00012023"; exon_number |
|       | "1"; oId "CUFF.10656.1"; tss_id "TSS8945"; |          |          |   |   |   |                                                                    |
| chr10 | Cufflinks exon                             | 38038508 | 38038646 | . | - | . | gene_id "XLOC_007056"; transcript_id "TCONS_00012023"; exon_number |
|       | "2"; oId "CUFF.10656.1"; tss_id "TSS8945"; |          |          |   |   |   |                                                                    |
| chr10 | Cufflinks exon                             | 38031805 | 38036957 | . | - | . | gene_id "XLOC_007056"; transcript_id "TCONS_00012025"; exon_number |
|       | "1"; oId "CUFF.10656.3"; tss_id "TSS8946"; |          |          |   |   |   |                                                                    |
| chr10 | Cufflinks exon                             | 38037271 | 38039634 | . | - | . | gene_id "XLOC_007056"; transcript_id "TCONS_00012025"; exon_number |
|       | "2"; oId "CUFF.10656.3"; tss_id "TSS8946"; |          |          |   |   |   |                                                                    |
| chr10 | Cufflinks exon                             | 43474465 | 43474547 | . | - | . | gene_id "XLOC_007078"; transcript_id "TCONS_00012078"; exon_number |
|       | "1"; oId "CUFF.10757.1"; tss_id "TSS8972"; |          |          |   |   |   |                                                                    |
| chr10 | Cufflinks exon                             | 43475731 | 43476007 | . | - | . | gene_id "XLOC_007078"; transcript_id "TCONS_00012078"; exon_number |
|       | "2"; oId "CUFF.10757.1"; tss_id "TSS8972"; |          |          |   |   |   |                                                                    |
| chr10 | Cufflinks exon                             | 43476816 | 43476955 | . | - | . | gene_id "XLOC_007078"; transcript_id "TCONS_00012078"; exon_number |
|       | "3"; oId "CUFF.10757.1"; tss_id "TSS8972"; |          |          |   |   |   |                                                                    |
| chr10 | Cufflinks exon                             | 43474465 | 43474547 | . | - | . | gene_id "XLOC_007078"; transcript_id "TCONS_00012079"; exon_number |
|       | "1"; oId "CUFF.10757.2"; tss_id "TSS8973"; |          |          |   |   |   |                                                                    |
| chr10 | Cufflinks exon                             | 43476816 | 43477005 | . | - | . | gene_id "XLOC_007078"; transcript_id "TCONS_00012079"; exon_number |
|       | "2"; oId "CUFF.10757.2"; tss_id "TSS8973"; |          |          |   |   |   |                                                                    |
| chr10 | Cufflinks exon                             | 43478598 | 43478786 | . | - | . | gene_id "XLOC_007078"; transcript_id "TCONS_00012079"; exon_number |
|       | "3"; oId "CUFF.10757.2"; tss_id "TSS8973"; |          |          |   |   |   |                                                                    |
| chr10 | Cufflinks exon                             | 45444244 | 45450076 | . | - | . | gene_id "XLOC_007096"; transcript_id "TCONS_00012107"; exon_number |
|       | "1"; oId "CUFF.10830.2"; tss_id "TSS8999"; |          |          |   |   |   |                                                                    |
| chr10 | Cufflinks exon                             | 45535356 | 45535368 | . | - | . | gene_id "XLOC_007096"; transcript_id "TCONS_00012107"; exon_number |
|       | "2"; oId "CUFF.10830.2"; tss_id "TSS8999"; |          |          |   |   |   |                                                                    |
| chr10 | Cufflinks exon                             | 46194895 | 46195704 | . | - | . | gene_id "XLOC_007107"; transcript_id "TCONS_00012134"; exon_number |
|       | "1"; oId "CUFF.10879.2"; tss_id "TSS9014"; |          |          |   |   |   |                                                                    |
| chr10 | Cufflinks exon                             | 46200675 | 46200744 | . | - | . | gene_id "XLOC_007107"; transcript_id "TCONS_00012134"; exon_number |
|       | "2"; oId "CUFF.10879.2"; tss_id "TSS9014"; |          |          |   |   |   |                                                                    |
| chr10 | Cufflinks exon                             | 46215308 | 46215403 | . | - | . | gene_id "XLOC_007107"; transcript_id "TCONS_00012141"; exon_number |

|                                            |   |   |   |                                                                    |  |
|--------------------------------------------|---|---|---|--------------------------------------------------------------------|--|
| "1"; oId "CUFF.10879.7"; tss_id "TSS9016"; |   |   |   |                                                                    |  |
| chr10 Cufflinks exon46217147 46217234      | . | - | . | gene_id "XLOC_007107"; transcript_id "TCONS_00012141"; exon_number |  |
| "2"; oId "CUFF.10879.7"; tss_id "TSS9016"; |   |   |   |                                                                    |  |
| chr10 Cufflinks exon46222279 46222609      | . | - | . | gene_id "XLOC_007107"; transcript_id "TCONS_00012141"; exon_number |  |
| "3"; oId "CUFF.10879.7"; tss_id "TSS9016"; |   |   |   |                                                                    |  |
| chr10 Cufflinks exon48510125 48514626      | . | - | . | gene_id "XLOC_007147"; transcript_id "TCONS_00012203"; exon_number |  |
| "1"; oId "CUFF.11002.1"; tss_id "TSS9068"; |   |   |   |                                                                    |  |
| chr10 Cufflinks exon48515336 48515853      | . | - | . | gene_id "XLOC_007147"; transcript_id "TCONS_00012203"; exon_number |  |
| "2"; oId "CUFF.11002.1"; tss_id "TSS9068"; |   |   |   |                                                                    |  |
| chr10 Cufflinks exon48510125 48514626      | . | - | . | gene_id "XLOC_007147"; transcript_id "TCONS_00012204"; exon_number |  |
| "1"; oId "CUFF.11002.4"; tss_id "TSS9069"; |   |   |   |                                                                    |  |
| chr10 Cufflinks exon48528370 48528456      | . | - | . | gene_id "XLOC_007147"; transcript_id "TCONS_00012204"; exon_number |  |
| "2"; oId "CUFF.11002.4"; tss_id "TSS9069"; |   |   |   |                                                                    |  |
| chr10 Cufflinks exon48531771 48532001      | . | - | . | gene_id "XLOC_007147"; transcript_id "TCONS_00012204"; exon_number |  |
| "3"; oId "CUFF.11002.4"; tss_id "TSS9069"; |   |   |   |                                                                    |  |
| chr10 Cufflinks exon48532191 48532289      | . | - | . | gene_id "XLOC_007147"; transcript_id "TCONS_00012204"; exon_number |  |
| "4"; oId "CUFF.11002.4"; tss_id "TSS9069"; |   |   |   |                                                                    |  |
| chr10 Cufflinks exon48510125 48514626      | . | - | . | gene_id "XLOC_007147"; transcript_id "TCONS_00012205"; exon_number |  |
| "1"; oId "CUFF.11002.3"; tss_id "TSS9069"; |   |   |   |                                                                    |  |
| chr10 Cufflinks exon48515336 48515550      | . | - | . | gene_id "XLOC_007147"; transcript_id "TCONS_00012205"; exon_number |  |
| "2"; oId "CUFF.11002.3"; tss_id "TSS9069"; |   |   |   |                                                                    |  |
| chr10 Cufflinks exon48528370 48528452      | . | - | . | gene_id "XLOC_007147"; transcript_id "TCONS_00012205"; exon_number |  |
| "3"; oId "CUFF.11002.3"; tss_id "TSS9069"; |   |   |   |                                                                    |  |
| chr10 Cufflinks exon48531767 48532354      | . | - | . | gene_id "XLOC_007147"; transcript_id "TCONS_00012205"; exon_number |  |
| "4"; oId "CUFF.11002.3"; tss_id "TSS9069"; |   |   |   |                                                                    |  |
| chr10 Cufflinks exon48510125 48514626      | . | - | . | gene_id "XLOC_007147"; transcript_id "TCONS_00012206"; exon_number |  |
| "1"; oId "CUFF.11002.2"; tss_id "TSS9069"; |   |   |   |                                                                    |  |
| chr10 Cufflinks exon48528370 48528446      | . | - | . | gene_id "XLOC_007147"; transcript_id "TCONS_00012206"; exon_number |  |
| "2"; oId "CUFF.11002.2"; tss_id "TSS9069"; |   |   |   |                                                                    |  |
| chr10 Cufflinks exon48531761 48532397      | . | - | . | gene_id "XLOC_007147"; transcript_id "TCONS_00012206"; exon_number |  |
| "3"; oId "CUFF.11002.2"; tss_id "TSS9069"; |   |   |   |                                                                    |  |
| chr10 Cufflinks exon52421241 52421262      | . | - | . | gene_id "XLOC_007210"; transcript_id "TCONS_00012320"; exon_number |  |
| "1"; oId "CUFF.11168.1"; tss_id "TSS9151"; |   |   |   |                                                                    |  |
| chr10 Cufflinks exon52426424 52426846      | . | - | . | gene_id "XLOC_007210"; transcript_id "TCONS_00012320"; exon_number |  |
| "2"; oId "CUFF.11168.1"; tss_id "TSS9151"; |   |   |   |                                                                    |  |
| chr10 Cufflinks exon54316750 54316901      | . | - | . | gene_id "XLOC_007216"; transcript_id "TCONS_00012326"; exon_number |  |
| "1"; oId "CUFF.11188.1"; tss_id "TSS9157"; |   |   |   |                                                                    |  |
| chr10 Cufflinks exon54320766 54320875      | . | - | . | gene_id "XLOC_007216"; transcript_id "TCONS_00012326"; exon_number |  |
| "2"; oId "CUFF.11188.1"; tss_id "TSS9157"; |   |   |   |                                                                    |  |
| chr10 Cufflinks exon54483656 54483778      | . | - | . | gene_id "XLOC_007216"; transcript_id "TCONS_00012326"; exon_number |  |
| "3"; oId "CUFF.11188.1"; tss_id "TSS9157"; |   |   |   |                                                                    |  |
| chr10 Cufflinks exon54515066 54515224      | . | - | . | gene_id "XLOC_007216"; transcript_id "TCONS_00012326"; exon_number |  |
| "4"; oId "CUFF.11188.1"; tss_id "TSS9157"; |   |   |   |                                                                    |  |

|       |                        |          |   |   |   |                                                                                                               |
|-------|------------------------|----------|---|---|---|---------------------------------------------------------------------------------------------------------------|
| chr10 | Cufflinks exon81805989 | 81808934 | . | - | . | gene_id "XLOC_007398"; transcript_id "TCONS_00012628"; exon_number "1"; oId "CUFF.11793.1"; tss_id "TSS9385"; |
| chr10 | Cufflinks exon81813152 | 81813342 | . | - | . | gene_id "XLOC_007398"; transcript_id "TCONS_00012628"; exon_number "2"; oId "CUFF.11793.1"; tss_id "TSS9385"; |
| chr10 | Cufflinks exon81820572 | 81820689 | . | - | . | gene_id "XLOC_007398"; transcript_id "TCONS_00012628"; exon_number "3"; oId "CUFF.11793.1"; tss_id "TSS9385"; |
| chr10 | Cufflinks exon81838483 | 81838949 | . | - | . | gene_id "XLOC_007398"; transcript_id "TCONS_00012628"; exon_number "4"; oId "CUFF.11793.1"; tss_id "TSS9385"; |
| chr10 | Cufflinks exon81805989 | 81808934 | . | - | . | gene_id "XLOC_007398"; transcript_id "TCONS_00012629"; exon_number "1"; oId "CUFF.11793.2"; tss_id "TSS9385"; |
| chr10 | Cufflinks exon81813152 | 81813342 | . | - | . | gene_id "XLOC_007398"; transcript_id "TCONS_00012629"; exon_number "2"; oId "CUFF.11793.2"; tss_id "TSS9385"; |
| chr10 | Cufflinks exon81815672 | 81815882 | . | - | . | gene_id "XLOC_007398"; transcript_id "TCONS_00012629"; exon_number "3"; oId "CUFF.11793.2"; tss_id "TSS9385"; |
| chr10 | Cufflinks exon81820572 | 81820689 | . | - | . | gene_id "XLOC_007398"; transcript_id "TCONS_00012629"; exon_number "4"; oId "CUFF.11793.2"; tss_id "TSS9385"; |
| chr10 | Cufflinks exon81838483 | 81838958 | . | - | . | gene_id "XLOC_007398"; transcript_id "TCONS_00012629"; exon_number "5"; oId "CUFF.11793.2"; tss_id "TSS9385"; |
| chr10 | Cufflinks exon82289353 | 82289587 | . | - | . | gene_id "XLOC_007406"; transcript_id "TCONS_00012642"; exon_number "1"; oId "CUFF.11815.1"; tss_id "TSS9394"; |
| chr10 | Cufflinks exon82295336 | 82295698 | . | - | . | gene_id "XLOC_007406"; transcript_id "TCONS_00012642"; exon_number "2"; oId "CUFF.11815.1"; tss_id "TSS9394"; |
| chr10 | Cufflinks exon88949579 | 88949781 | . | - | . | gene_id "XLOC_007420"; transcript_id "TCONS_00012671"; exon_number "1"; oId "CUFF.11892.2"; tss_id "TSS9413"; |
| chr10 | Cufflinks exon88952439 | 88952602 | . | - | . | gene_id "XLOC_007420"; transcript_id "TCONS_00012671"; exon_number "2"; oId "CUFF.11892.2"; tss_id "TSS9413"; |
| chr10 | Cufflinks exon88959098 | 88959121 | . | - | . | gene_id "XLOC_007420"; transcript_id "TCONS_00012671"; exon_number "3"; oId "CUFF.11892.2"; tss_id "TSS9413"; |
| chr10 | Cufflinks exon88949579 | 88949781 | . | - | . | gene_id "XLOC_007420"; transcript_id "TCONS_00012673"; exon_number "1"; oId "CUFF.11892.3"; tss_id "TSS9414"; |
| chr10 | Cufflinks exon88952207 | 88952602 | . | - | . | gene_id "XLOC_007420"; transcript_id "TCONS_00012673"; exon_number "2"; oId "CUFF.11892.3"; tss_id "TSS9414"; |
| chr10 | Cufflinks exon88962645 | 88962837 | . | - | . | gene_id "XLOC_007420"; transcript_id "TCONS_00012673"; exon_number "3"; oId "CUFF.11892.3"; tss_id "TSS9414"; |
| chr10 | Cufflinks exon88963332 | 88964136 | . | - | . | gene_id "XLOC_007420"; transcript_id "TCONS_00012673"; exon_number "4"; oId "CUFF.11892.3"; tss_id "TSS9414"; |
| chr10 | Cufflinks exon88949579 | 88949781 | . | - | . | gene_id "XLOC_007420"; transcript_id "TCONS_00012672"; exon_number "1"; oId "CUFF.11892.1"; tss_id "TSS9414"; |
| chr10 | Cufflinks exon88952439 | 88952602 | . | - | . | gene_id "XLOC_007420"; transcript_id "TCONS_00012672"; exon_number "2"; oId "CUFF.11892.1"; tss_id "TSS9414"; |
| chr10 | Cufflinks exon88962645 | 88962837 | . | - | . | gene_id "XLOC_007420"; transcript_id "TCONS_00012672"; exon_number "3"; oId "CUFF.11892.1"; tss_id "TSS9414"; |
| chr10 | Cufflinks exon88963332 | 88964136 | . | - | . | gene_id "XLOC_007420"; transcript_id "TCONS_00012672"; exon_number "4"; oId "CUFF.11892.1"; tss_id "TSS9414"; |

|                                             |   |   |   |                                                                    |  |
|---------------------------------------------|---|---|---|--------------------------------------------------------------------|--|
| "4"; oId "CUFF.11892.1"; tss_id "TSS9414";  |   |   |   |                                                                    |  |
| chr10 Cufflinks exon88960033 88961078       | . | - | . | gene_id "XLOC_007420"; transcript_id "TCONS_00012676"; exon_number |  |
| "1"; oId "CUFF.11892.5"; tss_id "TSS9415";  |   |   |   |                                                                    |  |
| chr10 Cufflinks exon88962645 88962837       | . | - | . | gene_id "XLOC_007420"; transcript_id "TCONS_00012676"; exon_number |  |
| "2"; oId "CUFF.11892.5"; tss_id "TSS9415";  |   |   |   |                                                                    |  |
| chr10 Cufflinks exon88963332 88963702       | . | - | . | gene_id "XLOC_007420"; transcript_id "TCONS_00012676"; exon_number |  |
| "3"; oId "CUFF.11892.5"; tss_id "TSS9415";  |   |   |   |                                                                    |  |
| chr10 Cufflinks exon89005881 89005969       | . | - | . | gene_id "XLOC_007420"; transcript_id "TCONS_00012676"; exon_number |  |
| "4"; oId "CUFF.11892.5"; tss_id "TSS9415";  |   |   |   |                                                                    |  |
| chr10 Cufflinks exon89048199 89048252       | . | - | . | gene_id "XLOC_007420"; transcript_id "TCONS_00012676"; exon_number |  |
| "5"; oId "CUFF.11892.5"; tss_id "TSS9415";  |   |   |   |                                                                    |  |
| chr10 Cufflinks exon89086387 89086429       | . | - | . | gene_id "XLOC_007420"; transcript_id "TCONS_00012676"; exon_number |  |
| "6"; oId "CUFF.11892.5"; tss_id "TSS9415";  |   |   |   |                                                                    |  |
| chr10 Cufflinks exon89087950 89088059       | . | - | . | gene_id "XLOC_007420"; transcript_id "TCONS_00012676"; exon_number |  |
| "7"; oId "CUFF.11892.5"; tss_id "TSS9415";  |   |   |   |                                                                    |  |
| chr10 Cufflinks exon89090676 89090853       | . | - | . | gene_id "XLOC_007420"; transcript_id "TCONS_00012676"; exon_number |  |
| "8"; oId "CUFF.11892.5"; tss_id "TSS9415";  |   |   |   |                                                                    |  |
| chr10 Cufflinks exon89096543 89096646       | . | - | . | gene_id "XLOC_007420"; transcript_id "TCONS_00012676"; exon_number |  |
| "9"; oId "CUFF.11892.5"; tss_id "TSS9415";  |   |   |   |                                                                    |  |
| chr10 Cufflinks exon89101999 89102832       | . | - | . | gene_id "XLOC_007420"; transcript_id "TCONS_00012676"; exon_number |  |
| "10"; oId "CUFF.11892.5"; tss_id "TSS9415"; |   |   |   |                                                                    |  |
| chr10 Cufflinks exon88961254 88962244       | . | - | . | gene_id "XLOC_007420"; transcript_id "TCONS_00012677"; exon_number |  |
| "1"; oId "CUFF.11892.10"; tss_id "TSS9416"; |   |   |   |                                                                    |  |
| chr10 Cufflinks exon88962645 88963693       | . | - | . | gene_id "XLOC_007420"; transcript_id "TCONS_00012677"; exon_number |  |
| "2"; oId "CUFF.11892.10"; tss_id "TSS9416"; |   |   |   |                                                                    |  |
| chr10 Cufflinks exon88966284 88967565       | . | - | . | gene_id "XLOC_007420"; transcript_id "TCONS_00012677"; exon_number |  |
| "3"; oId "CUFF.11892.10"; tss_id "TSS9416"; |   |   |   |                                                                    |  |
| chr10 Cufflinks exon88975751 88977835       | . | - | . | gene_id "XLOC_007420"; transcript_id "TCONS_00012677"; exon_number |  |
| "4"; oId "CUFF.11892.10"; tss_id "TSS9416"; |   |   |   |                                                                    |  |
| chr10 Cufflinks exon88964214 88967565       | . | - | . | gene_id "XLOC_007420"; transcript_id "TCONS_00012678"; exon_number |  |
| "1"; oId "CUFF.11892.11"; tss_id "TSS9416"; |   |   |   |                                                                    |  |
| chr10 Cufflinks exon88975751 88977835       | . | - | . | gene_id "XLOC_007420"; transcript_id "TCONS_00012678"; exon_number |  |
| "2"; oId "CUFF.11892.11"; tss_id "TSS9416"; |   |   |   |                                                                    |  |
| chr10 Cufflinks exon88967626 88968269       | . | - | . | gene_id "XLOC_007420"; transcript_id "TCONS_00012679"; exon_number |  |
| "1"; oId "CUFF.11892.13"; tss_id "TSS9416"; |   |   |   |                                                                    |  |
| chr10 Cufflinks exon88975751 88977835       | . | - | . | gene_id "XLOC_007420"; transcript_id "TCONS_00012679"; exon_number |  |
| "2"; oId "CUFF.11892.13"; tss_id "TSS9416"; |   |   |   |                                                                    |  |
| chr10 Cufflinks exon88975286 88975930       | . | - | . | gene_id "XLOC_007420"; transcript_id "TCONS_00012681"; exon_number |  |
| "1"; oId "CUFF.11892.17"; tss_id "TSS9417"; |   |   |   |                                                                    |  |
| chr10 Cufflinks exon89119641 89119864       | . | - | . | gene_id "XLOC_007420"; transcript_id "TCONS_00012681"; exon_number |  |
| "2"; oId "CUFF.11892.17"; tss_id "TSS9417"; |   |   |   |                                                                    |  |
| chr10 Cufflinks exon88998424 88998629       | . | - | . | gene_id "XLOC_007420"; transcript_id "TCONS_00012688"; exon_number |  |
| "1"; oId "CUFF.11892.19"; tss_id "TSS9418"; |   |   |   |                                                                    |  |

|       |                        |          |   |   |   |                                                                                                                |
|-------|------------------------|----------|---|---|---|----------------------------------------------------------------------------------------------------------------|
| chr10 | Cufflinks exon89005872 | 89005969 | . | - | . | gene_id "XLOC_007420"; transcript_id "TCONS_00012688"; exon_number "2"; oId "CUFF.11892.19"; tss_id "TSS9418"; |
| chr10 | Cufflinks exon89048199 | 89048252 | . | - | . | gene_id "XLOC_007420"; transcript_id "TCONS_00012688"; exon_number "3"; oId "CUFF.11892.19"; tss_id "TSS9418"; |
| chr10 | Cufflinks exon89086387 | 89086429 | . | - | . | gene_id "XLOC_007420"; transcript_id "TCONS_00012688"; exon_number "4"; oId "CUFF.11892.19"; tss_id "TSS9418"; |
| chr10 | Cufflinks exon89096543 | 89096646 | . | - | . | gene_id "XLOC_007420"; transcript_id "TCONS_00012688"; exon_number "5"; oId "CUFF.11892.19"; tss_id "TSS9418"; |
| chr10 | Cufflinks exon89101999 | 89102315 | . | - | . | gene_id "XLOC_007420"; transcript_id "TCONS_00012688"; exon_number "6"; oId "CUFF.11892.19"; tss_id "TSS9418"; |
| chr10 | Cufflinks exon91458957 | 91459428 | . | - | . | gene_id "XLOC_007452"; transcript_id "TCONS_00012731"; exon_number "1"; oId "CUFF.12091.7"; tss_id "TSS9458";  |
| chr10 | Cufflinks exon91460857 | 91461186 | . | - | . | gene_id "XLOC_007452"; transcript_id "TCONS_00012731"; exon_number "2"; oId "CUFF.12091.7"; tss_id "TSS9458";  |
| chr10 | Cufflinks exon93542595 | 93542917 | . | - | . | gene_id "XLOC_007459"; transcript_id "TCONS_00012742"; exon_number "1"; oId "CUFF.12144.4"; tss_id "TSS9466";  |
| chr10 | Cufflinks exon93557570 | 93557953 | . | - | . | gene_id "XLOC_007459"; transcript_id "TCONS_00012742"; exon_number "2"; oId "CUFF.12144.4"; tss_id "TSS9466";  |
| chr10 | Cufflinks exon93553225 | 93553300 | . | - | . | gene_id "XLOC_007459"; transcript_id "TCONS_00012743"; exon_number "1"; oId "CUFF.12144.6"; tss_id "TSS9467";  |
| chr10 | Cufflinks exon93557570 | 93558104 | . | - | . | gene_id "XLOC_007459"; transcript_id "TCONS_00012743"; exon_number "2"; oId "CUFF.12144.6"; tss_id "TSS9467";  |
| chr10 | Cufflinks exon93565802 | 93566158 | . | - | . | gene_id "XLOC_007460"; transcript_id "TCONS_00012744"; exon_number "1"; oId "CUFF.12147.1"; tss_id "TSS9468";  |
| chr10 | Cufflinks exon93700101 | 93700112 | . | - | . | gene_id "XLOC_007460"; transcript_id "TCONS_00012744"; exon_number "2"; oId "CUFF.12147.1"; tss_id "TSS9468";  |
| chr10 | Cufflinks exon97512963 | 97516471 | . | - | . | gene_id "XLOC_007502"; transcript_id "TCONS_00012810"; exon_number "1"; oId "CUFF.12296.1"; tss_id "TSS9525";  |
| chr10 | Cufflinks exon97544783 | 97545002 | . | - | . | gene_id "XLOC_007502"; transcript_id "TCONS_00012810"; exon_number "2"; oId "CUFF.12296.1"; tss_id "TSS9525";  |
| chr10 | Cufflinks exon97607149 | 97607242 | . | - | . | gene_id "XLOC_007502"; transcript_id "TCONS_00012810"; exon_number "3"; oId "CUFF.12296.1"; tss_id "TSS9525";  |
| chr10 | Cufflinks exon97636275 | 97636417 | . | - | . | gene_id "XLOC_007502"; transcript_id "TCONS_00012810"; exon_number "4"; oId "CUFF.12296.1"; tss_id "TSS9525";  |
| chr10 | Cufflinks exon97849023 | 97849064 | . | - | . | gene_id "XLOC_007502"; transcript_id "TCONS_00012810"; exon_number "5"; oId "CUFF.12296.1"; tss_id "TSS9525";  |
| chr10 | Cufflinks exon97849739 | 97849992 | . | - | . | gene_id "XLOC_007502"; transcript_id "TCONS_00012810"; exon_number "6"; oId "CUFF.12296.1"; tss_id "TSS9525";  |
| chr10 | Cufflinks exon97626779 | 97635423 | . | - | . | gene_id "XLOC_007502"; transcript_id "TCONS_00012818"; exon_number "1"; oId "CUFF.12296.6"; tss_id "TSS9528";  |
| chr10 | Cufflinks exon97636275 | 97636417 | . | - | . | gene_id "XLOC_007502"; transcript_id "TCONS_00012818"; exon_number "2"; oId "CUFF.12296.6"; tss_id "TSS9528";  |
| chr10 | Cufflinks exon97664587 | 97664695 | . | - | . | gene_id "XLOC_007502"; transcript_id "TCONS_00012818"; exon_number "3"; oId "CUFF.12296.6"; tss_id "TSS9528";  |

|                                            |                |          |          |   |                                                                        |
|--------------------------------------------|----------------|----------|----------|---|------------------------------------------------------------------------|
| "3"; oId "CUFF.12296.6"; tss_id "TSS9528"; |                |          |          |   |                                                                        |
| chr10                                      | Cufflinks exon | 97667420 | 97668743 | . | - . gene_id "XLOC_007502"; transcript_id "TCONS_00012818"; exon_number |
| "4"; oId "CUFF.12296.6"; tss_id "TSS9528"; |                |          |          |   |                                                                        |
| chr10                                      | Cufflinks exon | 97626779 | 97635423 | . | - . gene_id "XLOC_007502"; transcript_id "TCONS_00012819"; exon_number |
| "1"; oId "CUFF.12296.7"; tss_id "TSS9528"; |                |          |          |   |                                                                        |
| chr10                                      | Cufflinks exon | 97636275 | 97636417 | . | - . gene_id "XLOC_007502"; transcript_id "TCONS_00012819"; exon_number |
| "2"; oId "CUFF.12296.7"; tss_id "TSS9528"; |                |          |          |   |                                                                        |
| chr10                                      | Cufflinks exon | 97658644 | 97658775 | . | - . gene_id "XLOC_007502"; transcript_id "TCONS_00012819"; exon_number |
| "3"; oId "CUFF.12296.7"; tss_id "TSS9528"; |                |          |          |   |                                                                        |
| chr10                                      | Cufflinks exon | 97664587 | 97664695 | . | - . gene_id "XLOC_007502"; transcript_id "TCONS_00012819"; exon_number |
| "4"; oId "CUFF.12296.7"; tss_id "TSS9528"; |                |          |          |   |                                                                        |
| chr10                                      | Cufflinks exon | 97667420 | 97668743 | . | - . gene_id "XLOC_007502"; transcript_id "TCONS_00012819"; exon_number |
| "5"; oId "CUFF.12296.7"; tss_id "TSS9528"; |                |          |          |   |                                                                        |
| chr10                                      | Cufflinks exon | 97626779 | 97635423 | . | - . gene_id "XLOC_007502"; transcript_id "TCONS_00012817"; exon_number |
| "1"; oId "CUFF.12296.5"; tss_id "TSS9528"; |                |          |          |   |                                                                        |
| chr10                                      | Cufflinks exon | 97636275 | 97636417 | . | - . gene_id "XLOC_007502"; transcript_id "TCONS_00012817"; exon_number |
| "2"; oId "CUFF.12296.5"; tss_id "TSS9528"; |                |          |          |   |                                                                        |
| chr10                                      | Cufflinks exon | 97664587 | 97664695 | . | - . gene_id "XLOC_007502"; transcript_id "TCONS_00012817"; exon_number |
| "3"; oId "CUFF.12296.5"; tss_id "TSS9528"; |                |          |          |   |                                                                        |
| chr10                                      | Cufflinks exon | 97667535 | 97668743 | . | - . gene_id "XLOC_007502"; transcript_id "TCONS_00012817"; exon_number |
| "4"; oId "CUFF.12296.5"; tss_id "TSS9528"; |                |          |          |   |                                                                        |
| chr10                                      | Cufflinks exon | 97626779 | 97635423 | . | - . gene_id "XLOC_007502"; transcript_id "TCONS_00012816"; exon_number |
| "1"; oId "CUFF.12296.4"; tss_id "TSS9528"; |                |          |          |   |                                                                        |
| chr10                                      | Cufflinks exon | 97636275 | 97636417 | . | - . gene_id "XLOC_007502"; transcript_id "TCONS_00012816"; exon_number |
| "2"; oId "CUFF.12296.4"; tss_id "TSS9528"; |                |          |          |   |                                                                        |
| chr10                                      | Cufflinks exon | 97657285 | 97657436 | . | - . gene_id "XLOC_007502"; transcript_id "TCONS_00012816"; exon_number |
| "3"; oId "CUFF.12296.4"; tss_id "TSS9528"; |                |          |          |   |                                                                        |
| chr10                                      | Cufflinks exon | 97664587 | 97664695 | . | - . gene_id "XLOC_007502"; transcript_id "TCONS_00012816"; exon_number |
| "4"; oId "CUFF.12296.4"; tss_id "TSS9528"; |                |          |          |   |                                                                        |
| chr10                                      | Cufflinks exon | 97667420 | 97668743 | . | - . gene_id "XLOC_007502"; transcript_id "TCONS_00012816"; exon_number |
| "5"; oId "CUFF.12296.4"; tss_id "TSS9528"; |                |          |          |   |                                                                        |
| chr10                                      | Cufflinks exon | 97626779 | 97635423 | . | - . gene_id "XLOC_007502"; transcript_id "TCONS_00012821"; exon_number |
| "1"; oId "CUFF.12296.2"; tss_id "TSS9525"; |                |          |          |   |                                                                        |
| chr10                                      | Cufflinks exon | 97636275 | 97636417 | . | - . gene_id "XLOC_007502"; transcript_id "TCONS_00012821"; exon_number |
| "2"; oId "CUFF.12296.2"; tss_id "TSS9525"; |                |          |          |   |                                                                        |
| chr10                                      | Cufflinks exon | 97658644 | 97658775 | . | - . gene_id "XLOC_007502"; transcript_id "TCONS_00012821"; exon_number |
| "3"; oId "CUFF.12296.2"; tss_id "TSS9525"; |                |          |          |   |                                                                        |
| chr10                                      | Cufflinks exon | 97664587 | 97664695 | . | - . gene_id "XLOC_007502"; transcript_id "TCONS_00012821"; exon_number |
| "4"; oId "CUFF.12296.2"; tss_id "TSS9525"; |                |          |          |   |                                                                        |
| chr10                                      | Cufflinks exon | 97849023 | 97849064 | . | - . gene_id "XLOC_007502"; transcript_id "TCONS_00012821"; exon_number |
| "5"; oId "CUFF.12296.2"; tss_id "TSS9525"; |                |          |          |   |                                                                        |
| chr10                                      | Cufflinks exon | 97849739 | 97849992 | . | - . gene_id "XLOC_007502"; transcript_id "TCONS_00012821"; exon_number |
| "6"; oId "CUFF.12296.2"; tss_id "TSS9525"; |                |          |          |   |                                                                        |

|       |                                             |           |           |   |   |   |                                                                    |
|-------|---------------------------------------------|-----------|-----------|---|---|---|--------------------------------------------------------------------|
| chr10 | Cufflinks exon                              | 97780957  | 97781325  | . | - | . | gene_id "XLOC_007502"; transcript_id "TCONS_00012830"; exon_number |
|       | "1"; oId "CUFF.12296.11"; tss_id "TSS9525"; |           |           |   |   |   |                                                                    |
| chr10 | Cufflinks exon                              | 97802542  | 97802684  | . | - | . | gene_id "XLOC_007502"; transcript_id "TCONS_00012830"; exon_number |
|       | "2"; oId "CUFF.12296.11"; tss_id "TSS9525"; |           |           |   |   |   |                                                                    |
| chr10 | Cufflinks exon                              | 97849023  | 97849064  | . | - | . | gene_id "XLOC_007502"; transcript_id "TCONS_00012830"; exon_number |
|       | "3"; oId "CUFF.12296.11"; tss_id "TSS9525"; |           |           |   |   |   |                                                                    |
| chr10 | Cufflinks exon                              | 97849739  | 97849992  | . | - | . | gene_id "XLOC_007502"; transcript_id "TCONS_00012830"; exon_number |
|       | "4"; oId "CUFF.12296.11"; tss_id "TSS9525"; |           |           |   |   |   |                                                                    |
| chr10 | Cufflinks exon                              | 97780957  | 97781325  | . | - | . | gene_id "XLOC_007502"; transcript_id "TCONS_00012829"; exon_number |
|       | "1"; oId "CUFF.12296.10"; tss_id "TSS9525"; |           |           |   |   |   |                                                                    |
| chr10 | Cufflinks exon                              | 97849023  | 97849064  | . | - | . | gene_id "XLOC_007502"; transcript_id "TCONS_00012829"; exon_number |
|       | "2"; oId "CUFF.12296.10"; tss_id "TSS9525"; |           |           |   |   |   |                                                                    |
| chr10 | Cufflinks exon                              | 97849739  | 97849992  | . | - | . | gene_id "XLOC_007502"; transcript_id "TCONS_00012829"; exon_number |
|       | "3"; oId "CUFF.12296.10"; tss_id "TSS9525"; |           |           |   |   |   |                                                                    |
| chr10 | Cufflinks exon                              | 98044362  | 98064568  | . | - | . | gene_id "XLOC_007523"; transcript_id "TCONS_00012844"; exon_number |
|       | "1"; oId "CUFF.12349.1"; tss_id "TSS9550";  |           |           |   |   |   |                                                                    |
| chr10 | Cufflinks exon                              | 98066266  | 98066560  | . | - | . | gene_id "XLOC_007523"; transcript_id "TCONS_00012844"; exon_number |
|       | "2"; oId "CUFF.12349.1"; tss_id "TSS9550";  |           |           |   |   |   |                                                                    |
| chr10 | Cufflinks exon                              | 98882481  | 98882689  | . | - | . | gene_id "XLOC_007531"; transcript_id "TCONS_00012860"; exon_number |
|       | "1"; oId "CUFF.12381.1"; tss_id "TSS9564";  |           |           |   |   |   |                                                                    |
| chr10 | Cufflinks exon                              | 99053774  | 99053789  | . | - | . | gene_id "XLOC_007531"; transcript_id "TCONS_00012860"; exon_number |
|       | "2"; oId "CUFF.12381.1"; tss_id "TSS9564";  |           |           |   |   |   |                                                                    |
| chr10 | Cufflinks exon                              | 99578428  | 99578715  | . | - | . | gene_id "XLOC_007548"; transcript_id "TCONS_00012888"; exon_number |
|       | "1"; oId "CUFF.12429.1"; tss_id "TSS9586";  |           |           |   |   |   |                                                                    |
| chr10 | Cufflinks exon                              | 99583749  | 99584124  | . | - | . | gene_id "XLOC_007548"; transcript_id "TCONS_00012888"; exon_number |
|       | "2"; oId "CUFF.12429.1"; tss_id "TSS9586";  |           |           |   |   |   |                                                                    |
| chr10 | Cufflinks exon                              | 99578428  | 99578715  | . | - | . | gene_id "XLOC_007548"; transcript_id "TCONS_00012889"; exon_number |
|       | "1"; oId "CUFF.12429.2"; tss_id "TSS9587";  |           |           |   |   |   |                                                                    |
| chr10 | Cufflinks exon                              | 99583749  | 99583889  | . | - | . | gene_id "XLOC_007548"; transcript_id "TCONS_00012889"; exon_number |
|       | "2"; oId "CUFF.12429.2"; tss_id "TSS9587";  |           |           |   |   |   |                                                                    |
| chr10 | Cufflinks exon                              | 99589351  | 99589478  | . | - | . | gene_id "XLOC_007548"; transcript_id "TCONS_00012889"; exon_number |
|       | "3"; oId "CUFF.12429.2"; tss_id "TSS9587";  |           |           |   |   |   |                                                                    |
| chr10 | Cufflinks exon                              | 99609423  | 99609565  | . | - | . | gene_id "XLOC_007548"; transcript_id "TCONS_00012889"; exon_number |
|       | "4"; oId "CUFF.12429.2"; tss_id "TSS9587";  |           |           |   |   |   |                                                                    |
| chr10 | Cufflinks exon                              | 99581964  | 99583889  | . | - | . | gene_id "XLOC_007548"; transcript_id "TCONS_00012892"; exon_number |
|       | "1"; oId "CUFF.12429.3"; tss_id "TSS9587";  |           |           |   |   |   |                                                                    |
| chr10 | Cufflinks exon                              | 99589351  | 99589478  | . | - | . | gene_id "XLOC_007548"; transcript_id "TCONS_00012892"; exon_number |
|       | "2"; oId "CUFF.12429.3"; tss_id "TSS9587";  |           |           |   |   |   |                                                                    |
| chr10 | Cufflinks exon                              | 99609423  | 99609565  | . | - | . | gene_id "XLOC_007548"; transcript_id "TCONS_00012892"; exon_number |
|       | "3"; oId "CUFF.12429.3"; tss_id "TSS9587";  |           |           |   |   |   |                                                                    |
| chr10 | Cufflinks exon                              | 102804654 | 102816621 | . | - | . | gene_id "XLOC_007591"; transcript_id "TCONS_00012971"; exon_number |
|       | "1"; oId "CUFF.12557.1"; tss_id "TSS9649";  |           |           |   |   |   |                                                                    |
| chr10 | Cufflinks exon                              | 102819867 | 102821490 | . | - | . | gene_id "XLOC_007591"; transcript_id "TCONS_00012971"; exon_number |

|                                            |   |   |   |                                                                    |  |
|--------------------------------------------|---|---|---|--------------------------------------------------------------------|--|
| "2"; oId "CUFF.12557.1"; tss_id "TSS9649"; |   |   |   |                                                                    |  |
| chr10 Cufflinks exon102804654 102817327    | . | - | . | gene_id "XLOC_007591"; transcript_id "TCONS_00012973"; exon_number |  |
| "1"; oId "CUFF.12557.2"; tss_id "TSS9650"; |   |   |   |                                                                    |  |
| chr10 Cufflinks exon102819867 102821183    | . | - | . | gene_id "XLOC_007591"; transcript_id "TCONS_00012973"; exon_number |  |
| "2"; oId "CUFF.12557.2"; tss_id "TSS9650"; |   |   |   |                                                                    |  |
| chr10 Cufflinks exon102821528 102822430    | . | - | . | gene_id "XLOC_007591"; transcript_id "TCONS_00012973"; exon_number |  |
| "3"; oId "CUFF.12557.2"; tss_id "TSS9650"; |   |   |   |                                                                    |  |
| chr10 Cufflinks exon105705216 105705228    | . | - | . | gene_id "XLOC_007640"; transcript_id "TCONS_00013074"; exon_number |  |
| "1"; oId "CUFF.12725.3"; tss_id "TSS9720"; |   |   |   |                                                                    |  |
| chr10 Cufflinks exon105719521 105719598    | . | - | . | gene_id "XLOC_007640"; transcript_id "TCONS_00013074"; exon_number |  |
| "2"; oId "CUFF.12725.3"; tss_id "TSS9720"; |   |   |   |                                                                    |  |
| chr10 Cufflinks exon105726489 105726800    | . | - | . | gene_id "XLOC_007640"; transcript_id "TCONS_00013074"; exon_number |  |
| "3"; oId "CUFF.12725.3"; tss_id "TSS9720"; |   |   |   |                                                                    |  |
| chr10 Cufflinks exon105718066 105718304    | . | - | . | gene_id "XLOC_007640"; transcript_id "TCONS_00013075"; exon_number |  |
| "1"; oId "CUFF.12725.5"; tss_id "TSS9720"; |   |   |   |                                                                    |  |
| chr10 Cufflinks exon105719521 105719598    | . | - | . | gene_id "XLOC_007640"; transcript_id "TCONS_00013075"; exon_number |  |
| "2"; oId "CUFF.12725.5"; tss_id "TSS9720"; |   |   |   |                                                                    |  |
| chr10 Cufflinks exon105725539 105725671    | . | - | . | gene_id "XLOC_007640"; transcript_id "TCONS_00013075"; exon_number |  |
| "3"; oId "CUFF.12725.5"; tss_id "TSS9720"; |   |   |   |                                                                    |  |
| chr10 Cufflinks exon105725857 105726001    | . | - | . | gene_id "XLOC_007640"; transcript_id "TCONS_00013075"; exon_number |  |
| "4"; oId "CUFF.12725.5"; tss_id "TSS9720"; |   |   |   |                                                                    |  |
| chr10 Cufflinks exon105726489 105726783    | . | - | . | gene_id "XLOC_007640"; transcript_id "TCONS_00013075"; exon_number |  |
| "5"; oId "CUFF.12725.5"; tss_id "TSS9720"; |   |   |   |                                                                    |  |
| chr10 Cufflinks exon105718066 105718304    | . | - | . | gene_id "XLOC_007640"; transcript_id "TCONS_00013076"; exon_number |  |
| "1"; oId "CUFF.12725.6"; tss_id "TSS9720"; |   |   |   |                                                                    |  |
| chr10 Cufflinks exon105719521 105719598    | . | - | . | gene_id "XLOC_007640"; transcript_id "TCONS_00013076"; exon_number |  |
| "2"; oId "CUFF.12725.6"; tss_id "TSS9720"; |   |   |   |                                                                    |  |
| chr10 Cufflinks exon105725539 105725998    | . | - | . | gene_id "XLOC_007640"; transcript_id "TCONS_00013076"; exon_number |  |
| "3"; oId "CUFF.12725.6"; tss_id "TSS9720"; |   |   |   |                                                                    |  |
| chr10 Cufflinks exon105726489 105726663    | . | - | . | gene_id "XLOC_007640"; transcript_id "TCONS_00013076"; exon_number |  |
| "4"; oId "CUFF.12725.6"; tss_id "TSS9720"; |   |   |   |                                                                    |  |
| chr10 Cufflinks exon105726765 105726791    | . | - | . | gene_id "XLOC_007640"; transcript_id "TCONS_00013076"; exon_number |  |
| "5"; oId "CUFF.12725.6"; tss_id "TSS9720"; |   |   |   |                                                                    |  |
| chr10 Cufflinks exon112188600 112188768    | . | - | . | gene_id "XLOC_007652"; transcript_id "TCONS_00013098"; exon_number |  |
| "1"; oId "CUFF.12772.2"; tss_id "TSS9735"; |   |   |   |                                                                    |  |
| chr10 Cufflinks exon112194882 112194965    | . | - | . | gene_id "XLOC_007652"; transcript_id "TCONS_00013098"; exon_number |  |
| "2"; oId "CUFF.12772.2"; tss_id "TSS9735"; |   |   |   |                                                                    |  |
| chr10 Cufflinks exon112201969 112202132    | . | - | . | gene_id "XLOC_007652"; transcript_id "TCONS_00013098"; exon_number |  |
| "3"; oId "CUFF.12772.2"; tss_id "TSS9735"; |   |   |   |                                                                    |  |
| chr10 Cufflinks exon112219519 112219649    | . | - | . | gene_id "XLOC_007652"; transcript_id "TCONS_00013098"; exon_number |  |
| "4"; oId "CUFF.12772.2"; tss_id "TSS9735"; |   |   |   |                                                                    |  |
| chr10 Cufflinks exon112220233 112220260    | . | - | . | gene_id "XLOC_007652"; transcript_id "TCONS_00013098"; exon_number |  |
| "5"; oId "CUFF.12772.2"; tss_id "TSS9735"; |   |   |   |                                                                    |  |



|       |                |           |           |   |   |   |                                                                                                               |
|-------|----------------|-----------|-----------|---|---|---|---------------------------------------------------------------------------------------------------------------|
| chr10 | Cufflinks exon | 112188600 | 112188768 | . | - | . | gene_id "XLOC_007652"; transcript_id "TCONS_00013099"; exon_number "1"; oId "CUFF.12772.1"; tss_id "TSS9736"; |
| chr10 | Cufflinks exon | 112194882 | 112194965 | . | - | . | gene_id "XLOC_007652"; transcript_id "TCONS_00013099"; exon_number "2"; oId "CUFF.12772.1"; tss_id "TSS9736"; |
| chr10 | Cufflinks exon | 112201969 | 112202132 | . | - | . | gene_id "XLOC_007652"; transcript_id "TCONS_00013099"; exon_number "3"; oId "CUFF.12772.1"; tss_id "TSS9736"; |
| chr10 | Cufflinks exon | 112219519 | 112219649 | . | - | . | gene_id "XLOC_007652"; transcript_id "TCONS_00013099"; exon_number "4"; oId "CUFF.12772.1"; tss_id "TSS9736"; |
| chr10 | Cufflinks exon | 112219955 | 112220195 | . | - | . | gene_id "XLOC_007652"; transcript_id "TCONS_00013099"; exon_number "5"; oId "CUFF.12772.1"; tss_id "TSS9736"; |
| chr10 | Cufflinks exon | 112220308 | 112220389 | . | - | . | gene_id "XLOC_007652"; transcript_id "TCONS_00013099"; exon_number "6"; oId "CUFF.12772.1"; tss_id "TSS9736"; |
| chr10 | Cufflinks exon | 112194151 | 112194722 | . | - | . | gene_id "XLOC_007652"; transcript_id "TCONS_00013101"; exon_number "1"; oId "CUFF.12772.3"; tss_id "TSS9736"; |
| chr10 | Cufflinks exon | 112194882 | 112194965 | . | - | . | gene_id "XLOC_007652"; transcript_id "TCONS_00013101"; exon_number "2"; oId "CUFF.12772.3"; tss_id "TSS9736"; |
| chr10 | Cufflinks exon | 112201969 | 112202132 | . | - | . | gene_id "XLOC_007652"; transcript_id "TCONS_00013101"; exon_number "3"; oId "CUFF.12772.3"; tss_id "TSS9736"; |
| chr10 | Cufflinks exon | 112219519 | 112219649 | . | - | . | gene_id "XLOC_007652"; transcript_id "TCONS_00013101"; exon_number "4"; oId "CUFF.12772.3"; tss_id "TSS9736"; |
| chr10 | Cufflinks exon | 112220308 | 112220362 | . | - | . | gene_id "XLOC_007652"; transcript_id "TCONS_00013101"; exon_number "5"; oId "CUFF.12772.3"; tss_id "TSS9736"; |
| chr10 | Cufflinks exon | 112234901 | 112234985 | . | - | . | gene_id "XLOC_007654"; transcript_id "TCONS_00013102"; exon_number "1"; oId "CUFF.12776.1"; tss_id "TSS9738"; |
| chr10 | Cufflinks exon | 112255890 | 112257525 | . | - | . | gene_id "XLOC_007654"; transcript_id "TCONS_00013102"; exon_number "2"; oId "CUFF.12776.1"; tss_id "TSS9738"; |
| chr10 | Cufflinks exon | 112628648 | 112630196 | . | - | . | gene_id "XLOC_007660"; transcript_id "TCONS_00013110"; exon_number "1"; oId "CUFF.12792.2"; tss_id "TSS9745"; |
| chr10 | Cufflinks exon | 112631446 | 112631491 | . | - | . | gene_id "XLOC_007660"; transcript_id "TCONS_00013110"; exon_number "2"; oId "CUFF.12792.2"; tss_id "TSS9745"; |
| chr10 | Cufflinks exon | 112628648 | 112630196 | . | - | . | gene_id "XLOC_007660"; transcript_id "TCONS_00013111"; exon_number "1"; oId "CUFF.12792.3"; tss_id "TSS9746"; |
| chr10 | Cufflinks exon | 112631785 | 112632578 | . | - | . | gene_id "XLOC_007660"; transcript_id "TCONS_00013111"; exon_number "2"; oId "CUFF.12792.3"; tss_id "TSS9746"; |
| chr10 | Cufflinks exon | 116510939 | 116511030 | . | - | . | gene_id "XLOC_007681"; transcript_id "TCONS_00013155"; exon_number "1"; oId "CUFF.12876.1"; tss_id "TSS9778"; |
| chr10 | Cufflinks exon | 116581032 | 116581436 | . | - | . | gene_id "XLOC_007681"; transcript_id "TCONS_00013155"; exon_number "2"; oId "CUFF.12876.1"; tss_id "TSS9778"; |
| chr10 | Cufflinks exon | 122114153 | 122114447 | . | - | . | gene_id "XLOC_007754"; transcript_id "TCONS_00013265"; exon_number "1"; oId "CUFF.13090.1"; tss_id "TSS9867"; |
| chr10 | Cufflinks exon | 122150452 | 122150463 | . | - | . | gene_id "XLOC_007754"; transcript_id "TCONS_00013265"; exon_number "2"; oId "CUFF.13090.1"; tss_id "TSS9867"; |
| chr10 | Cufflinks exon | 127389084 | 127389151 | . | - | . | gene_id "XLOC_007800"; transcript_id "TCONS_00013362"; exon_number                                            |

"1"; oId "CUFF.13281.1"; tss\_id "TSS9932";  
chr10 Cufflinks exon127395621 127395769 . - . gene\_id "XLOC\_007800"; transcript\_id "TCONS\_00013362"; exon\_number  
"2"; oId "CUFF.13281.1"; tss\_id "TSS9932";  
chr10 Cufflinks exon127395970 127396328 . - . gene\_id "XLOC\_007800"; transcript\_id "TCONS\_00013362"; exon\_number  
"3"; oId "CUFF.13281.1"; tss\_id "TSS9932";  
chr10 Cufflinks exon127398067 127398136 . - . gene\_id "XLOC\_007800"; transcript\_id "TCONS\_00013362"; exon\_number  
"4"; oId "CUFF.13281.1"; tss\_id "TSS9932";  
chr10 Cufflinks exon127400043 127400157 . - . gene\_id "XLOC\_007800"; transcript\_id "TCONS\_00013362"; exon\_number  
"5"; oId "CUFF.13281.1"; tss\_id "TSS9932";  
chr10 Cufflinks exon127407991 127408062 . - . gene\_id "XLOC\_007800"; transcript\_id "TCONS\_00013362"; exon\_number  
"6"; oId "CUFF.13281.1"; tss\_id "TSS9932";  
chr10 Cufflinks exon127392204 127392792 . - . gene\_id "XLOC\_007800"; transcript\_id "TCONS\_00013365"; exon\_number  
"1"; oId "CUFF.13281.3"; tss\_id "TSS9932";  
chr10 Cufflinks exon127395625 127396328 . - . gene\_id "XLOC\_007800"; transcript\_id "TCONS\_00013365"; exon\_number  
"2"; oId "CUFF.13281.3"; tss\_id "TSS9932";  
chr10 Cufflinks exon127398067 127398136 . - . gene\_id "XLOC\_007800"; transcript\_id "TCONS\_00013365"; exon\_number  
"3"; oId "CUFF.13281.3"; tss\_id "TSS9932";  
chr10 Cufflinks exon127407991 127408074 . - . gene\_id "XLOC\_007800"; transcript\_id "TCONS\_00013365"; exon\_number  
"4"; oId "CUFF.13281.3"; tss\_id "TSS9932";  
chr10 Cufflinks exon127393859 127396328 . - . gene\_id "XLOC\_007800"; transcript\_id "TCONS\_00013366"; exon\_number  
"1"; oId "CUFF.13281.6"; tss\_id "TSS9934";  
chr10 Cufflinks exon127398067 127398137 . - . gene\_id "XLOC\_007800"; transcript\_id "TCONS\_00013366"; exon\_number  
"2"; oId "CUFF.13281.6"; tss\_id "TSS9934";  
chr10 Cufflinks exon127405812 127405850 . - . gene\_id "XLOC\_007800"; transcript\_id "TCONS\_00013366"; exon\_number  
"3"; oId "CUFF.13281.6"; tss\_id "TSS9934";  
chr10 Cufflinks exon127393859 127396328 . - . gene\_id "XLOC\_007800"; transcript\_id "TCONS\_00013367"; exon\_number  
"1"; oId "CUFF.13281.5"; tss\_id "TSS9932";  
chr10 Cufflinks exon127398067 127398136 . - . gene\_id "XLOC\_007800"; transcript\_id "TCONS\_00013367"; exon\_number  
"2"; oId "CUFF.13281.5"; tss\_id "TSS9932";  
chr10 Cufflinks exon127407474 127407987 . - . gene\_id "XLOC\_007800"; transcript\_id "TCONS\_00013367"; exon\_number  
"3"; oId "CUFF.13281.5"; tss\_id "TSS9932";  
chr10 Cufflinks exon127393859 127396328 . - . gene\_id "XLOC\_007800"; transcript\_id "TCONS\_00013369"; exon\_number  
"1"; oId "CUFF.13281.7"; tss\_id "TSS9932";  
chr10 Cufflinks exon127398067 127398138 . - . gene\_id "XLOC\_007800"; transcript\_id "TCONS\_00013369"; exon\_number  
"2"; oId "CUFF.13281.7"; tss\_id "TSS9932";  
chr10 Cufflinks exon127407991 127408062 . - . gene\_id "XLOC\_007800"; transcript\_id "TCONS\_00013369"; exon\_number  
"3"; oId "CUFF.13281.7"; tss\_id "TSS9932";  
chr10 Cufflinks exon127393859 127395769 . - . gene\_id "XLOC\_007800"; transcript\_id "TCONS\_00013368"; exon\_number  
"1"; oId "CUFF.13281.4"; tss\_id "TSS9932";  
chr10 Cufflinks exon127395970 127396328 . - . gene\_id "XLOC\_007800"; transcript\_id "TCONS\_00013368"; exon\_number  
"2"; oId "CUFF.13281.4"; tss\_id "TSS9932";  
chr10 Cufflinks exon127398067 127398136 . - . gene\_id "XLOC\_007800"; transcript\_id "TCONS\_00013368"; exon\_number  
"3"; oId "CUFF.13281.4"; tss\_id "TSS9932";

|       |                         |           |   |   |   |                                                                                                                |
|-------|-------------------------|-----------|---|---|---|----------------------------------------------------------------------------------------------------------------|
| chr10 | Cufflinks exon127400043 | 127400157 | . | - | . | gene_id "XLOC_007800"; transcript_id "TCONS_00013368"; exon_number "4"; oId "CUFF.13281.4"; tss_id "TSS9932";  |
| chr10 | Cufflinks exon127407991 | 127408062 | . | - | . | gene_id "XLOC_007800"; transcript_id "TCONS_00013368"; exon_number "5"; oId "CUFF.13281.4"; tss_id "TSS9932";  |
| chr10 | Cufflinks exon130833552 | 130834787 | . | - | . | gene_id "XLOC_007835"; transcript_id "TCONS_00013413"; exon_number "1"; oId "CUFF.13393.3"; tss_id "TSS9974";  |
| chr10 | Cufflinks exon130834910 | 130834958 | . | - | . | gene_id "XLOC_007835"; transcript_id "TCONS_00013413"; exon_number "2"; oId "CUFF.13393.3"; tss_id "TSS9974";  |
| chr10 | Cufflinks exon130833552 | 130834720 | . | - | . | gene_id "XLOC_007835"; transcript_id "TCONS_00013415"; exon_number "1"; oId "CUFF.13393.2"; tss_id "TSS9974";  |
| chr10 | Cufflinks exon130834910 | 130835016 | . | - | . | gene_id "XLOC_007835"; transcript_id "TCONS_00013415"; exon_number "2"; oId "CUFF.13393.2"; tss_id "TSS9974";  |
| chr10 | Cufflinks exon130833552 | 130834337 | . | - | . | gene_id "XLOC_007835"; transcript_id "TCONS_00013414"; exon_number "1"; oId "CUFF.13393.1"; tss_id "TSS9974";  |
| chr10 | Cufflinks exon130834643 | 130834720 | . | - | . | gene_id "XLOC_007835"; transcript_id "TCONS_00013414"; exon_number "2"; oId "CUFF.13393.1"; tss_id "TSS9974";  |
| chr10 | Cufflinks exon130834910 | 130835016 | . | - | . | gene_id "XLOC_007835"; transcript_id "TCONS_00013414"; exon_number "3"; oId "CUFF.13393.1"; tss_id "TSS9974";  |
| chr10 | Cufflinks exon134319994 | 134322433 | . | - | . | gene_id "XLOC_007887"; transcript_id "TCONS_00013490"; exon_number "1"; oId "CUFF.13550.1"; tss_id "TSS10033"; |
| chr10 | Cufflinks exon134324660 | 134324762 | . | - | . | gene_id "XLOC_007887"; transcript_id "TCONS_00013490"; exon_number "2"; oId "CUFF.13550.1"; tss_id "TSS10033"; |
| chr10 | Cufflinks exon134319994 | 134322433 | . | - | . | gene_id "XLOC_007887"; transcript_id "TCONS_00013491"; exon_number "1"; oId "CUFF.13550.2"; tss_id "TSS10033"; |
| chr10 | Cufflinks exon134324725 | 134324770 | . | - | . | gene_id "XLOC_007887"; transcript_id "TCONS_00013491"; exon_number "2"; oId "CUFF.13550.2"; tss_id "TSS10033"; |
| chr11 | Cufflinks exon318604    | 318746    | . | + | . | gene_id "XLOC_007936"; transcript_id "TCONS_00013571"; exon_number "1"; oId "CUFF.13703.2"; tss_id "TSS10098"; |
| chr11 | Cufflinks exon319848    | 321230    | . | + | . | gene_id "XLOC_007936"; transcript_id "TCONS_00013571"; exon_number "2"; oId "CUFF.13703.2"; tss_id "TSS10098"; |
| chr11 | Cufflinks exon318685    | 318746    | . | + | . | gene_id "XLOC_007936"; transcript_id "TCONS_00013572"; exon_number "1"; oId "CUFF.13703.4"; tss_id "TSS10098"; |
| chr11 | Cufflinks exon319184    | 321230    | . | + | . | gene_id "XLOC_007936"; transcript_id "TCONS_00013572"; exon_number "2"; oId "CUFF.13703.4"; tss_id "TSS10098"; |
| chr11 | Cufflinks exon318825    | 321277    | . | + | . | gene_id "XLOC_007936"; transcript_id "TCONS_00013573"; exon_number "1"; oId "CUFF.13703.5"; tss_id "TSS10099"; |
| chr11 | Cufflinks exon344631    | 344657    | . | + | . | gene_id "XLOC_007936"; transcript_id "TCONS_00013573"; exon_number "2"; oId "CUFF.13703.5"; tss_id "TSS10099"; |
| chr11 | Cufflinks exon327048    | 327628    | . | + | . | gene_id "XLOC_007937"; transcript_id "TCONS_00013574"; exon_number "1"; oId "CUFF.13704.1"; tss_id "TSS10100"; |
| chr11 | Cufflinks exon329099    | 329231    | . | + | . | gene_id "XLOC_007937"; transcript_id "TCONS_00013574"; exon_number "2"; oId "CUFF.13704.1"; tss_id "TSS10100"; |
| chr11 | Cufflinks exon329983    | 331152    | . | + | . | gene_id "XLOC_007937"; transcript_id "TCONS_00013574"; exon_number "3"; oId                                    |

"CUFF.13704.1"; tss\_id "TSS10100";  
chr11 Cufflinks exon331244 331342 . + . gene\_id "XLOC\_007937"; transcript\_id "TCONS\_00013574"; exon\_number "4"; oId  
"CUFF.13704.1"; tss\_id "TSS10100";  
chr11 Cufflinks exon331933 332029 . + . gene\_id "XLOC\_007937"; transcript\_id "TCONS\_00013574"; exon\_number "5"; oId  
"CUFF.13704.1"; tss\_id "TSS10100";  
chr11 Cufflinks exon332703 333665 . + . gene\_id "XLOC\_007937"; transcript\_id "TCONS\_00013574"; exon\_number "6"; oId  
"CUFF.13704.1"; tss\_id "TSS10100";  
chr11 Cufflinks exon327319 327628 . + . gene\_id "XLOC\_007937"; transcript\_id "TCONS\_00013575"; exon\_number "1"; oId  
"CUFF.13704.4"; tss\_id "TSS10101";  
chr11 Cufflinks exon329104 329231 . + . gene\_id "XLOC\_007937"; transcript\_id "TCONS\_00013575"; exon\_number "2"; oId  
"CUFF.13704.4"; tss\_id "TSS10101";  
chr11 Cufflinks exon329983 331156 . + . gene\_id "XLOC\_007937"; transcript\_id "TCONS\_00013575"; exon\_number "3"; oId  
"CUFF.13704.4"; tss\_id "TSS10101";  
chr11 Cufflinks exon331241 332029 . + . gene\_id "XLOC\_007937"; transcript\_id "TCONS\_00013575"; exon\_number "4"; oId  
"CUFF.13704.4"; tss\_id "TSS10101";  
chr11 Cufflinks exon332703 333665 . + . gene\_id "XLOC\_007937"; transcript\_id "TCONS\_00013575"; exon\_number "5"; oId  
"CUFF.13704.4"; tss\_id "TSS10101";  
chr11 Cufflinks exon327348 327592 . + . gene\_id "XLOC\_007937"; transcript\_id "TCONS\_00013576"; exon\_number "1"; oId  
"CUFF.13704.6"; tss\_id "TSS10101";  
chr11 Cufflinks exon329983 331152 . + . gene\_id "XLOC\_007937"; transcript\_id "TCONS\_00013576"; exon\_number "2"; oId  
"CUFF.13704.6"; tss\_id "TSS10101";  
chr11 Cufflinks exon331244 331342 . + . gene\_id "XLOC\_007937"; transcript\_id "TCONS\_00013576"; exon\_number "3"; oId  
"CUFF.13704.6"; tss\_id "TSS10101";  
chr11 Cufflinks exon332703 333665 . + . gene\_id "XLOC\_007937"; transcript\_id "TCONS\_00013576"; exon\_number "4"; oId  
"CUFF.13704.6"; tss\_id "TSS10101";  
chr11 Cufflinks exon327595 327628 . + . gene\_id "XLOC\_007937"; transcript\_id "TCONS\_00013577"; exon\_number "1"; oId  
"CUFF.13704.7"; tss\_id "TSS10102";  
chr11 Cufflinks exon329104 329231 . + . gene\_id "XLOC\_007937"; transcript\_id "TCONS\_00013577"; exon\_number "2"; oId  
"CUFF.13704.7"; tss\_id "TSS10102";  
chr11 Cufflinks exon329983 331152 . + . gene\_id "XLOC\_007937"; transcript\_id "TCONS\_00013577"; exon\_number "3"; oId  
"CUFF.13704.7"; tss\_id "TSS10102";  
chr11 Cufflinks exon331244 331342 . + . gene\_id "XLOC\_007937"; transcript\_id "TCONS\_00013577"; exon\_number "4"; oId  
"CUFF.13704.7"; tss\_id "TSS10102";  
chr11 Cufflinks exon332703 333665 . + . gene\_id "XLOC\_007937"; transcript\_id "TCONS\_00013577"; exon\_number "5"; oId  
"CUFF.13704.7"; tss\_id "TSS10102";  
chr11 Cufflinks exon330033 330101 . + . gene\_id "XLOC\_007937"; transcript\_id "TCONS\_00013580"; exon\_number "1"; oId  
"CUFF.13704.9"; tss\_id "TSS10103";  
chr11 Cufflinks exon330312 331152 . + . gene\_id "XLOC\_007937"; transcript\_id "TCONS\_00013580"; exon\_number "2"; oId  
"CUFF.13704.9"; tss\_id "TSS10103";  
chr11 Cufflinks exon331244 331342 . + . gene\_id "XLOC\_007937"; transcript\_id "TCONS\_00013580"; exon\_number "3"; oId  
"CUFF.13704.9"; tss\_id "TSS10103";  
chr11 Cufflinks exon332703 333665 . + . gene\_id "XLOC\_007937"; transcript\_id "TCONS\_00013580"; exon\_number "4"; oId  
"CUFF.13704.9"; tss\_id "TSS10103";

|       |                       |         |   |   |   |                                                                                                                |
|-------|-----------------------|---------|---|---|---|----------------------------------------------------------------------------------------------------------------|
| chr11 | Cufflinks exon330033  | 330101  | . | + | . | gene_id "XLOC_007937"; transcript_id "TCONS_00013579"; exon_number "1"; oId "CUFF.13704.8"; tss_id "TSS10103"; |
| chr11 | Cufflinks exon330312  | 331342  | . | + | . | gene_id "XLOC_007937"; transcript_id "TCONS_00013579"; exon_number "2"; oId "CUFF.13704.8"; tss_id "TSS10103"; |
| chr11 | Cufflinks exon331933  | 332029  | . | + | . | gene_id "XLOC_007937"; transcript_id "TCONS_00013579"; exon_number "3"; oId "CUFF.13704.8"; tss_id "TSS10103"; |
| chr11 | Cufflinks exon332703  | 333665  | . | + | . | gene_id "XLOC_007937"; transcript_id "TCONS_00013579"; exon_number "4"; oId "CUFF.13704.8"; tss_id "TSS10103"; |
| chr11 | Cufflinks exon415352  | 416994  | . | + | . | gene_id "XLOC_007943"; transcript_id "TCONS_00013587"; exon_number "1"; oId "CUFF.13725.1"; tss_id "TSS10110"; |
| chr11 | Cufflinks exon420383  | 420769  | . | + | . | gene_id "XLOC_007943"; transcript_id "TCONS_00013587"; exon_number "2"; oId "CUFF.13725.1"; tss_id "TSS10110"; |
| chr11 | Cufflinks exon423954  | 424300  | . | + | . | gene_id "XLOC_007943"; transcript_id "TCONS_00013587"; exon_number "3"; oId "CUFF.13725.1"; tss_id "TSS10110"; |
| chr11 | Cufflinks exon417472  | 418624  | . | + | . | gene_id "XLOC_007943"; transcript_id "TCONS_00013588"; exon_number "1"; oId "CUFF.13725.2"; tss_id "TSS10111"; |
| chr11 | Cufflinks exon419219  | 419348  | . | + | . | gene_id "XLOC_007943"; transcript_id "TCONS_00013588"; exon_number "2"; oId "CUFF.13725.2"; tss_id "TSS10111"; |
| chr11 | Cufflinks exon420097  | 421001  | . | + | . | gene_id "XLOC_007943"; transcript_id "TCONS_00013588"; exon_number "3"; oId "CUFF.13725.2"; tss_id "TSS10111"; |
| chr11 | Cufflinks exon417789  | 420287  | . | + | . | gene_id "XLOC_007943"; transcript_id "TCONS_00013589"; exon_number "1"; oId "CUFF.13725.3"; tss_id "TSS10112"; |
| chr11 | Cufflinks exon420383  | 421001  | . | + | . | gene_id "XLOC_007943"; transcript_id "TCONS_00013589"; exon_number "2"; oId "CUFF.13725.3"; tss_id "TSS10112"; |
| chr11 | Cufflinks exon448230  | 448419  | . | + | . | gene_id "XLOC_007944"; transcript_id "TCONS_00013590"; exon_number "1"; oId "CUFF.13730.1"; tss_id "TSS10113"; |
| chr11 | Cufflinks exon449569  | 449671  | . | + | . | gene_id "XLOC_007944"; transcript_id "TCONS_00013590"; exon_number "2"; oId "CUFF.13730.1"; tss_id "TSS10113"; |
| chr11 | Cufflinks exon778221  | 780381  | . | + | . | gene_id "XLOC_007974"; transcript_id "TCONS_00013632"; exon_number "1"; oId "CUFF.13784.1"; tss_id "TSS10149"; |
| chr11 | Cufflinks exon780562  | 783513  | . | + | . | gene_id "XLOC_007974"; transcript_id "TCONS_00013632"; exon_number "2"; oId "CUFF.13784.1"; tss_id "TSS10149"; |
| chr11 | Cufflinks exon1993999 | 1997465 | . | + | . | gene_id "XLOC_008005"; transcript_id "TCONS_00013686"; exon_number "1"; oId "CUFF.13869.2"; tss_id "TSS10190"; |
| chr11 | Cufflinks exon1997490 | 2002775 | . | + | . | gene_id "XLOC_008005"; transcript_id "TCONS_00013686"; exon_number "2"; oId "CUFF.13869.2"; tss_id "TSS10190"; |
| chr11 | Cufflinks exon1993999 | 1997464 | . | + | . | gene_id "XLOC_008005"; transcript_id "TCONS_00013685"; exon_number "1"; oId "CUFF.13869.1"; tss_id "TSS10190"; |
| chr11 | Cufflinks exon1997489 | 2002775 | . | + | . | gene_id "XLOC_008005"; transcript_id "TCONS_00013685"; exon_number "2"; oId "CUFF.13869.1"; tss_id "TSS10190"; |
| chr11 | Cufflinks exon3276798 | 3277266 | . | + | . | gene_id "XLOC_008034"; transcript_id "TCONS_00013726"; exon_number "1"; oId "CUFF.13964.1"; tss_id "TSS10225"; |
| chr11 | Cufflinks exon3279207 | 3279510 | . | + | . | gene_id "XLOC_008034"; transcript_id "TCONS_00013726"; exon_number "2"; oId "CUFF.13964.1"; tss_id "TSS10225"; |

"CUFF.13964.1"; tss\_id "TSS10225";  
chr11 Cufflinks exon4201864 4201941 . + . gene\_id "XLOC\_008062"; transcript\_id "TCONS\_00013764"; exon\_number "1"; oId  
"CUFF.14035.1"; tss\_id "TSS10258";  
chr11 Cufflinks exon4223489 4224525 . + . gene\_id "XLOC\_008062"; transcript\_id "TCONS\_00013764"; exon\_number "2"; oId  
"CUFF.14035.1"; tss\_id "TSS10258";  
chr11 Cufflinks exon4208374 4208434 . + . gene\_id "XLOC\_008062"; transcript\_id "TCONS\_00013765"; exon\_number "1"; oId  
"CUFF.14035.2"; tss\_id "TSS10259";  
chr11 Cufflinks exon4223489 4224525 . + . gene\_id "XLOC\_008062"; transcript\_id "TCONS\_00013765"; exon\_number "2"; oId  
"CUFF.14035.2"; tss\_id "TSS10259";  
chr11 Cufflinks exon9779787 9780050 . + . gene\_id "XLOC\_008115"; transcript\_id "TCONS\_00013852"; exon\_number "1"; oId  
"CUFF.14316.1"; tss\_id "TSS10324";  
chr11 Cufflinks exon9829395 9835933 . + . gene\_id "XLOC\_008115"; transcript\_id "TCONS\_00013852"; exon\_number "2"; oId  
"CUFF.14316.1"; tss\_id "TSS10324";  
chr11 Cufflinks exon9779840 9780050 . + . gene\_id "XLOC\_008115"; transcript\_id "TCONS\_00013853"; exon\_number "1"; oId  
"CUFF.14316.2"; tss\_id "TSS10324";  
chr11 Cufflinks exon9829395 9830831 . + . gene\_id "XLOC\_008115"; transcript\_id "TCONS\_00013853"; exon\_number "2"; oId  
"CUFF.14316.2"; tss\_id "TSS10324";  
chr11 Cufflinks exon9831807 9835933 . + . gene\_id "XLOC\_008115"; transcript\_id "TCONS\_00013853"; exon\_number "3"; oId  
"CUFF.14316.2"; tss\_id "TSS10324";  
chr11 Cufflinks exon10329642 10330220 . + . gene\_id "XLOC\_008118"; transcript\_id "TCONS\_00013857"; exon\_number  
"1"; oId "CUFF.14325.1"; tss\_id "TSS10328";  
chr11 Cufflinks exon10352117 10352256 . + . gene\_id "XLOC\_008118"; transcript\_id "TCONS\_00013857"; exon\_number  
"2"; oId "CUFF.14325.1"; tss\_id "TSS10328";  
chr11 Cufflinks exon10407187 10407217 . + . gene\_id "XLOC\_008118"; transcript\_id "TCONS\_00013857"; exon\_number  
"3"; oId "CUFF.14325.1"; tss\_id "TSS10328";  
chr11 Cufflinks exon10329679 10330220 . + . gene\_id "XLOC\_008118"; transcript\_id "TCONS\_00013858"; exon\_number  
"1"; oId "CUFF.14325.4"; tss\_id "TSS10328";  
chr11 Cufflinks exon10352117 10352256 . + . gene\_id "XLOC\_008118"; transcript\_id "TCONS\_00013858"; exon\_number  
"2"; oId "CUFF.14325.4"; tss\_id "TSS10328";  
chr11 Cufflinks exon10355176 10355223 . + . gene\_id "XLOC\_008118"; transcript\_id "TCONS\_00013858"; exon\_number  
"3"; oId "CUFF.14325.4"; tss\_id "TSS10328";  
chr11 Cufflinks exon10329679 10330220 . + . gene\_id "XLOC\_008118"; transcript\_id "TCONS\_00013859"; exon\_number  
"1"; oId "CUFF.14325.3"; tss\_id "TSS10328";  
chr11 Cufflinks exon10352117 10352256 . + . gene\_id "XLOC\_008118"; transcript\_id "TCONS\_00013859"; exon\_number  
"2"; oId "CUFF.14325.3"; tss\_id "TSS10328";  
chr11 Cufflinks exon10378822 10378938 . + . gene\_id "XLOC\_008118"; transcript\_id "TCONS\_00013859"; exon\_number  
"3"; oId "CUFF.14325.3"; tss\_id "TSS10328";  
chr11 Cufflinks exon10382152 10382483 . + . gene\_id "XLOC\_008118"; transcript\_id "TCONS\_00013859"; exon\_number  
"4"; oId "CUFF.14325.3"; tss\_id "TSS10328";  
chr11 Cufflinks exon10329679 10330220 . + . gene\_id "XLOC\_008118"; transcript\_id "TCONS\_00013860"; exon\_number  
"1"; oId "CUFF.14325.2"; tss\_id "TSS10328";  
chr11 Cufflinks exon10352117 10352256 . + . gene\_id "XLOC\_008118"; transcript\_id "TCONS\_00013860"; exon\_number  
"2"; oId "CUFF.14325.2"; tss\_id "TSS10328";

|       |                |          |          |   |   |   |                                                                                                                |
|-------|----------------|----------|----------|---|---|---|----------------------------------------------------------------------------------------------------------------|
| chr11 | Cufflinks exon | 10432304 | 10432523 | . | + | . | gene_id "XLOC_008118"; transcript_id "TCONS_00013860"; exon_number "3"; oId "CUFF.14325.2"; tss_id "TSS10328"; |
| chr11 | Cufflinks exon | 10438323 | 10438449 | . | + | . | gene_id "XLOC_008118"; transcript_id "TCONS_00013860"; exon_number "4"; oId "CUFF.14325.2"; tss_id "TSS10328"; |
| chr11 | Cufflinks exon | 10329686 | 10330220 | . | + | . | gene_id "XLOC_008118"; transcript_id "TCONS_00013861"; exon_number "1"; oId "CUFF.14325.5"; tss_id "TSS10328"; |
| chr11 | Cufflinks exon | 10352117 | 10352256 | . | + | . | gene_id "XLOC_008118"; transcript_id "TCONS_00013861"; exon_number "2"; oId "CUFF.14325.5"; tss_id "TSS10328"; |
| chr11 | Cufflinks exon | 10378822 | 10378938 | . | + | . | gene_id "XLOC_008118"; transcript_id "TCONS_00013861"; exon_number "3"; oId "CUFF.14325.5"; tss_id "TSS10328"; |
| chr11 | Cufflinks exon | 10432304 | 10432523 | . | + | . | gene_id "XLOC_008118"; transcript_id "TCONS_00013861"; exon_number "4"; oId "CUFF.14325.5"; tss_id "TSS10328"; |
| chr11 | Cufflinks exon | 10451923 | 10452220 | . | + | . | gene_id "XLOC_008118"; transcript_id "TCONS_00013861"; exon_number "5"; oId "CUFF.14325.5"; tss_id "TSS10328"; |
| chr11 | Cufflinks exon | 10329783 | 10330220 | . | + | . | gene_id "XLOC_008118"; transcript_id "TCONS_00013862"; exon_number "1"; oId "CUFF.14325.6"; tss_id "TSS10329"; |
| chr11 | Cufflinks exon | 10352117 | 10352256 | . | + | . | gene_id "XLOC_008118"; transcript_id "TCONS_00013862"; exon_number "2"; oId "CUFF.14325.6"; tss_id "TSS10329"; |
| chr11 | Cufflinks exon | 10352648 | 10352674 | . | + | . | gene_id "XLOC_008118"; transcript_id "TCONS_00013862"; exon_number "3"; oId "CUFF.14325.6"; tss_id "TSS10329"; |
| chr11 | Cufflinks exon | 10329860 | 10330220 | . | + | . | gene_id "XLOC_008118"; transcript_id "TCONS_00013863"; exon_number "1"; oId "CUFF.14325.8"; tss_id "TSS10329"; |
| chr11 | Cufflinks exon | 10352117 | 10352256 | . | + | . | gene_id "XLOC_008118"; transcript_id "TCONS_00013863"; exon_number "2"; oId "CUFF.14325.8"; tss_id "TSS10329"; |
| chr11 | Cufflinks exon | 10432304 | 10432523 | . | + | . | gene_id "XLOC_008118"; transcript_id "TCONS_00013863"; exon_number "3"; oId "CUFF.14325.8"; tss_id "TSS10329"; |
| chr11 | Cufflinks exon | 10451923 | 10452220 | . | + | . | gene_id "XLOC_008118"; transcript_id "TCONS_00013863"; exon_number "4"; oId "CUFF.14325.8"; tss_id "TSS10329"; |
| chr11 | Cufflinks exon | 14926458 | 14927015 | . | + | . | gene_id "XLOC_008146"; transcript_id "TCONS_00013912"; exon_number "1"; oId "CUFF.14481.1"; tss_id "TSS10364"; |
| chr11 | Cufflinks exon | 14929405 | 14930699 | . | + | . | gene_id "XLOC_008146"; transcript_id "TCONS_00013912"; exon_number "2"; oId "CUFF.14481.1"; tss_id "TSS10364"; |
| chr11 | Cufflinks exon | 19315612 | 19321717 | . | + | . | gene_id "XLOC_008199"; transcript_id "TCONS_00013982"; exon_number "1"; oId "CUFF.14664.2"; tss_id "TSS10427"; |
| chr11 | Cufflinks exon | 19322708 | 19322791 | . | + | . | gene_id "XLOC_008199"; transcript_id "TCONS_00013982"; exon_number "2"; oId "CUFF.14664.2"; tss_id "TSS10427"; |
| chr11 | Cufflinks exon | 19322924 | 19323030 | . | + | . | gene_id "XLOC_008199"; transcript_id "TCONS_00013982"; exon_number "3"; oId "CUFF.14664.2"; tss_id "TSS10427"; |
| chr11 | Cufflinks exon | 19329737 | 19335353 | . | + | . | gene_id "XLOC_008199"; transcript_id "TCONS_00013982"; exon_number "4"; oId "CUFF.14664.2"; tss_id "TSS10427"; |
| chr11 | Cufflinks exon | 19315612 | 19321717 | . | + | . | gene_id "XLOC_008199"; transcript_id "TCONS_00013981"; exon_number "1"; oId "CUFF.14664.1"; tss_id "TSS10427"; |
| chr11 | Cufflinks exon | 19322708 | 19322791 | . | + | . | gene_id "XLOC_008199"; transcript_id "TCONS_00013981"; exon_number "2"; oId "CUFF.14664.1"; tss_id "TSS10427"; |

"2"; oId "CUFF.14664.1"; tss\_id "TSS10427";  
chr11 Cufflinks exon19329737 19329908 . + . gene\_id "XLOC\_008199"; transcript\_id "TCONS\_00013981"; exon\_number  
"3"; oId "CUFF.14664.1"; tss\_id "TSS10427";  
chr11 Cufflinks exon19332179 19335353 . + . gene\_id "XLOC\_008199"; transcript\_id "TCONS\_00013981"; exon\_number  
"4"; oId "CUFF.14664.1"; tss\_id "TSS10427";  
chr11 Cufflinks exon19321889 19322791 . + . gene\_id "XLOC\_008199"; transcript\_id "TCONS\_00013983"; exon\_number  
"1"; oId "CUFF.14664.4"; tss\_id "TSS10428";  
chr11 Cufflinks exon19333014 19335353 . + . gene\_id "XLOC\_008199"; transcript\_id "TCONS\_00013983"; exon\_number  
"2"; oId "CUFF.14664.4"; tss\_id "TSS10428";  
chr11 Cufflinks exon19326934 19329908 . + . gene\_id "XLOC\_008199"; transcript\_id "TCONS\_00013985"; exon\_number  
"1"; oId "CUFF.14664.6"; tss\_id "TSS10430";  
chr11 Cufflinks exon19332179 19335353 . + . gene\_id "XLOC\_008199"; transcript\_id "TCONS\_00013985"; exon\_number  
"2"; oId "CUFF.14664.6"; tss\_id "TSS10430";  
chr11 Cufflinks exon20208961 20209129 . + . gene\_id "XLOC\_008206"; transcript\_id "TCONS\_00014001"; exon\_number  
"1"; oId "CUFF.14681.1"; tss\_id "TSS10442";  
chr11 Cufflinks exon20220812 20221557 . + . gene\_id "XLOC\_008206"; transcript\_id "TCONS\_00014001"; exon\_number  
"2"; oId "CUFF.14681.1"; tss\_id "TSS10442";  
chr11 Cufflinks exon20210683 20210800 . + . gene\_id "XLOC\_008206"; transcript\_id "TCONS\_00014002"; exon\_number  
"1"; oId "CUFF.14681.2"; tss\_id "TSS10443";  
chr11 Cufflinks exon20220812 20221557 . + . gene\_id "XLOC\_008206"; transcript\_id "TCONS\_00014002"; exon\_number  
"2"; oId "CUFF.14681.2"; tss\_id "TSS10443";  
chr11 Cufflinks exon27528372 27528445 . + . gene\_id "XLOC\_008266"; transcript\_id "TCONS\_00014078"; exon\_number  
"1"; oId "CUFF.14883.3"; tss\_id "TSS10509";  
chr11 Cufflinks exon27561567 27561663 . + . gene\_id "XLOC\_008266"; transcript\_id "TCONS\_00014078"; exon\_number  
"2"; oId "CUFF.14883.3"; tss\_id "TSS10509";  
chr11 Cufflinks exon27661392 27661552 . + . gene\_id "XLOC\_008266"; transcript\_id "TCONS\_00014078"; exon\_number  
"3"; oId "CUFF.14883.3"; tss\_id "TSS10509";  
chr11 Cufflinks exon27679788 27680009 . + . gene\_id "XLOC\_008266"; transcript\_id "TCONS\_00014078"; exon\_number  
"4"; oId "CUFF.14883.3"; tss\_id "TSS10509";  
chr11 Cufflinks exon27680718 27680775 . + . gene\_id "XLOC\_008266"; transcript\_id "TCONS\_00014078"; exon\_number  
"5"; oId "CUFF.14883.3"; tss\_id "TSS10509";  
chr11 Cufflinks exon27698529 27699350 . + . gene\_id "XLOC\_008266"; transcript\_id "TCONS\_00014078"; exon\_number  
"6"; oId "CUFF.14883.3"; tss\_id "TSS10509";  
chr11 Cufflinks exon27528372 27528445 . + . gene\_id "XLOC\_008266"; transcript\_id "TCONS\_00014077"; exon\_number  
"1"; oId "CUFF.14883.1"; tss\_id "TSS10509";  
chr11 Cufflinks exon27561567 27561663 . + . gene\_id "XLOC\_008266"; transcript\_id "TCONS\_00014077"; exon\_number  
"2"; oId "CUFF.14883.1"; tss\_id "TSS10509";  
chr11 Cufflinks exon27605816 27605884 . + . gene\_id "XLOC\_008266"; transcript\_id "TCONS\_00014077"; exon\_number  
"3"; oId "CUFF.14883.1"; tss\_id "TSS10509";  
chr11 Cufflinks exon27661392 27661552 . + . gene\_id "XLOC\_008266"; transcript\_id "TCONS\_00014077"; exon\_number  
"4"; oId "CUFF.14883.1"; tss\_id "TSS10509";  
chr11 Cufflinks exon27679788 27680009 . + . gene\_id "XLOC\_008266"; transcript\_id "TCONS\_00014077"; exon\_number  
"5"; oId "CUFF.14883.1"; tss\_id "TSS10509";



|       |                |          |          |   |   |   |                                                                                                                |
|-------|----------------|----------|----------|---|---|---|----------------------------------------------------------------------------------------------------------------|
| chr11 | Cufflinks exon | 27680718 | 27680775 | . | + | . | gene_id "XLOC_008266"; transcript_id "TCONS_00014077"; exon_number "6"; oId "CUFF.14883.1"; tss_id "TSS10509"; |
| chr11 | Cufflinks exon | 27697124 | 27697687 | . | + | . | gene_id "XLOC_008266"; transcript_id "TCONS_00014077"; exon_number "7"; oId "CUFF.14883.1"; tss_id "TSS10509"; |
| chr11 | Cufflinks exon | 27698529 | 27699350 | . | + | . | gene_id "XLOC_008266"; transcript_id "TCONS_00014077"; exon_number "8"; oId "CUFF.14883.1"; tss_id "TSS10509"; |
| chr11 | Cufflinks exon | 27528372 | 27528445 | . | + | . | gene_id "XLOC_008266"; transcript_id "TCONS_00014079"; exon_number "1"; oId "CUFF.14883.2"; tss_id "TSS10509"; |
| chr11 | Cufflinks exon | 27561567 | 27561663 | . | + | . | gene_id "XLOC_008266"; transcript_id "TCONS_00014079"; exon_number "2"; oId "CUFF.14883.2"; tss_id "TSS10509"; |
| chr11 | Cufflinks exon | 27661392 | 27661552 | . | + | . | gene_id "XLOC_008266"; transcript_id "TCONS_00014079"; exon_number "3"; oId "CUFF.14883.2"; tss_id "TSS10509"; |
| chr11 | Cufflinks exon | 27679785 | 27680009 | . | + | . | gene_id "XLOC_008266"; transcript_id "TCONS_00014079"; exon_number "4"; oId "CUFF.14883.2"; tss_id "TSS10509"; |
| chr11 | Cufflinks exon | 27680718 | 27680775 | . | + | . | gene_id "XLOC_008266"; transcript_id "TCONS_00014079"; exon_number "5"; oId "CUFF.14883.2"; tss_id "TSS10509"; |
| chr11 | Cufflinks exon | 27696919 | 27697687 | . | + | . | gene_id "XLOC_008266"; transcript_id "TCONS_00014079"; exon_number "6"; oId "CUFF.14883.2"; tss_id "TSS10509"; |
| chr11 | Cufflinks exon | 27698529 | 27698686 | . | + | . | gene_id "XLOC_008266"; transcript_id "TCONS_00014079"; exon_number "7"; oId "CUFF.14883.2"; tss_id "TSS10509"; |
| chr11 | Cufflinks exon | 27719025 | 27719718 | . | + | . | gene_id "XLOC_008266"; transcript_id "TCONS_00014079"; exon_number "8"; oId "CUFF.14883.2"; tss_id "TSS10509"; |
| chr11 | Cufflinks exon | 27528399 | 27528445 | . | + | . | gene_id "XLOC_008266"; transcript_id "TCONS_00014082"; oId "CUFF.14883.6"; tss_id "TSS10509";                  |
| chr11 | Cufflinks exon | 27561567 | 27561663 | . | + | . | gene_id "XLOC_008266"; transcript_id "TCONS_00014082"; oId "CUFF.14883.6"; tss_id "TSS10509";                  |
| chr11 | Cufflinks exon | 27661392 | 27661552 | . | + | . | gene_id "XLOC_008266"; transcript_id "TCONS_00014082"; oId "CUFF.14883.6"; tss_id "TSS10509";                  |
| chr11 | Cufflinks exon | 27680718 | 27680775 | . | + | . | gene_id "XLOC_008266"; transcript_id "TCONS_00014082"; oId "CUFF.14883.6"; tss_id "TSS10509";                  |
| chr11 | Cufflinks exon | 27697124 | 27697687 | . | + | . | gene_id "XLOC_008266"; transcript_id "TCONS_00014082"; oId "CUFF.14883.6"; tss_id "TSS10509";                  |
| chr11 | Cufflinks exon | 27698529 | 27699350 | . | + | . | gene_id "XLOC_008266"; transcript_id "TCONS_00014082"; oId "CUFF.14883.6"; tss_id "TSS10509";                  |
| chr11 | Cufflinks exon | 27528399 | 27528445 | . | + | . | gene_id "XLOC_008266"; transcript_id "TCONS_00014083"; oId "CUFF.14883.7"; tss_id "TSS10509";                  |
| chr11 | Cufflinks exon | 27561567 | 27561663 | . | + | . | gene_id "XLOC_008266"; transcript_id "TCONS_00014083"; oId "CUFF.14883.7"; tss_id "TSS10509";                  |
| chr11 | Cufflinks exon | 27605816 | 27605884 | . | + | . | gene_id "XLOC_008266"; transcript_id "TCONS_00014083"; oId "CUFF.14883.7"; tss_id "TSS10509";                  |
| chr11 | Cufflinks exon | 27661392 | 27661552 | . | + | . | gene_id "XLOC_008266"; transcript_id "TCONS_00014083"; oId "CUFF.14883.7"; tss_id "TSS10509";                  |
| chr11 | Cufflinks exon | 27679788 | 27680009 | . | + | . | gene_id "XLOC_008266"; transcript_id "TCONS_00014083"; oId "CUFF.14883.7"; tss_id "TSS10509";                  |

exon\_number "5"; oId "CUFF.14883.7"; tss\_id "TSS10509";  
chr11 Cufflinks exon 27680718 27680775 . + . gene\_id "XLOC\_008266"; transcript\_id "TCONS\_00014083";  
exon\_number "6"; oId "CUFF.14883.7"; tss\_id "TSS10509";  
chr11 Cufflinks exon 27696844 27697687 . + . gene\_id "XLOC\_008266"; transcript\_id "TCONS\_00014083";  
exon\_number "7"; oId "CUFF.14883.7"; tss\_id "TSS10509";  
chr11 Cufflinks exon 27698529 27699350 . + . gene\_id "XLOC\_008266"; transcript\_id "TCONS\_00014083";  
exon\_number "8"; oId "CUFF.14883.7"; tss\_id "TSS10509";  
chr11 Cufflinks exon 27528399 27528445 . + . gene\_id "XLOC\_008266"; transcript\_id "TCONS\_00014081";  
exon\_number "1"; oId "CUFF.14883.5"; tss\_id "TSS10509";  
chr11 Cufflinks exon 27561567 27561663 . + . gene\_id "XLOC\_008266"; transcript\_id "TCONS\_00014081";  
exon\_number "2"; oId "CUFF.14883.5"; tss\_id "TSS10509";  
chr11 Cufflinks exon 27605816 27605884 . + . gene\_id "XLOC\_008266"; transcript\_id "TCONS\_00014081";  
exon\_number "3"; oId "CUFF.14883.5"; tss\_id "TSS10509";  
chr11 Cufflinks exon 27661392 27661552 . + . gene\_id "XLOC\_008266"; transcript\_id "TCONS\_00014081";  
exon\_number "4"; oId "CUFF.14883.5"; tss\_id "TSS10509";  
chr11 Cufflinks exon 27679788 27680009 . + . gene\_id "XLOC\_008266"; transcript\_id "TCONS\_00014081";  
exon\_number "5"; oId "CUFF.14883.5"; tss\_id "TSS10509";  
chr11 Cufflinks exon 27680718 27680775 . + . gene\_id "XLOC\_008266"; transcript\_id "TCONS\_00014081";  
exon\_number "6"; oId "CUFF.14883.5"; tss\_id "TSS10509";  
chr11 Cufflinks exon 27698529 27699350 . + . gene\_id "XLOC\_008266"; transcript\_id "TCONS\_00014081";  
exon\_number "7"; oId "CUFF.14883.5"; tss\_id "TSS10509";  
chr11 Cufflinks exon 27528399 27528445 . + . gene\_id "XLOC\_008266"; transcript\_id "TCONS\_00014080";  
exon\_number "1"; oId "CUFF.14883.4"; tss\_id "TSS10509";  
chr11 Cufflinks exon 27561567 27561663 . + . gene\_id "XLOC\_008266"; transcript\_id "TCONS\_00014080";  
exon\_number "2"; oId "CUFF.14883.4"; tss\_id "TSS10509";  
chr11 Cufflinks exon 27661392 27661552 . + . gene\_id "XLOC\_008266"; transcript\_id "TCONS\_00014080";  
exon\_number "3"; oId "CUFF.14883.4"; tss\_id "TSS10509";  
chr11 Cufflinks exon 27679788 27680009 . + . gene\_id "XLOC\_008266"; transcript\_id "TCONS\_00014080";  
exon\_number "4"; oId "CUFF.14883.4"; tss\_id "TSS10509";  
chr11 Cufflinks exon 27680718 27680775 . + . gene\_id "XLOC\_008266"; transcript\_id "TCONS\_00014080";  
exon\_number "5"; oId "CUFF.14883.4"; tss\_id "TSS10509";  
chr11 Cufflinks exon 27697124 27697687 . + . gene\_id "XLOC\_008266"; transcript\_id "TCONS\_00014080";  
exon\_number "6"; oId "CUFF.14883.4"; tss\_id "TSS10509";  
chr11 Cufflinks exon 27698529 27699350 . + . gene\_id "XLOC\_008266"; transcript\_id "TCONS\_00014080";  
exon\_number "7"; oId "CUFF.14883.4"; tss\_id "TSS10509";  
chr11 Cufflinks exon 27528399 27528445 . + . gene\_id "XLOC\_008266"; transcript\_id "TCONS\_00014084";  
exon\_number "1"; oId "CUFF.14883.8"; tss\_id "TSS10509";  
chr11 Cufflinks exon 27561567 27561663 . + . gene\_id "XLOC\_008266"; transcript\_id "TCONS\_00014084";  
exon\_number "2"; oId "CUFF.14883.8"; tss\_id "TSS10509";  
chr11 Cufflinks exon 27661392 27661552 . + . gene\_id "XLOC\_008266"; transcript\_id "TCONS\_00014084";  
exon\_number "3"; oId "CUFF.14883.8"; tss\_id "TSS10509";  
chr11 Cufflinks exon 27679788 27680009 . + . gene\_id "XLOC\_008266"; transcript\_id "TCONS\_00014084";  
exon\_number "4"; oId "CUFF.14883.8"; tss\_id "TSS10509";

|                                                         |                                                                    |
|---------------------------------------------------------|--------------------------------------------------------------------|
| chr11 Cufflinks exon 27680718 27680775 . + .            | gene_id "XLOC_008266"; transcript_id "TCONS_00014084";             |
| exon_number "5"; oId "CUFF.14883.8"; tss_id "TSS10509"; |                                                                    |
| chr11 Cufflinks exon 27719025 27719718 . + .            | gene_id "XLOC_008266"; transcript_id "TCONS_00014084";             |
| exon_number "6"; oId "CUFF.14883.8"; tss_id "TSS10509"; |                                                                    |
| chr11 Cufflinks exon 32457064 32457392 . + .            | gene_id "XLOC_008310"; transcript_id "TCONS_00014136";             |
| exon_number "1"; oId "CUFF.15018.1"; tss_id "TSS10555"; |                                                                    |
| chr11 Cufflinks exon 32458616 32458743 . + .            | gene_id "XLOC_008310"; transcript_id "TCONS_00014136";             |
| exon_number "2"; oId "CUFF.15018.1"; tss_id "TSS10555"; |                                                                    |
| chr11 Cufflinks exon 32459391 32467881 . + .            | gene_id "XLOC_008310"; transcript_id "TCONS_00014136";             |
| exon_number "3"; oId "CUFF.15018.1"; tss_id "TSS10555"; |                                                                    |
| chr11 Cufflinks exon 32457399 32458383 . + .            | gene_id "XLOC_008310"; transcript_id "TCONS_00014137";             |
| exon_number "1"; oId "CUFF.15018.2"; tss_id "TSS10556"; |                                                                    |
| chr11 Cufflinks exon 32459391 32467881 . + .            | gene_id "XLOC_008310"; transcript_id "TCONS_00014137";             |
| exon_number "2"; oId "CUFF.15018.2"; tss_id "TSS10556"; |                                                                    |
| chr11 Cufflinks exon 33183096 33183327 . + .            | gene_id "XLOC_008328"; transcript_id "TCONS_00014161";             |
| exon_number "1"; oId "CUFF.15054.2"; tss_id "TSS10578"; |                                                                    |
| chr11 Cufflinks exon 33210316 33210396 . + .            | gene_id "XLOC_008328"; transcript_id "TCONS_00014161";             |
| exon_number "2"; oId "CUFF.15054.2"; tss_id "TSS10578"; |                                                                    |
| chr11 Cufflinks exon 33211479 33213142 . + .            | gene_id "XLOC_008328"; transcript_id "TCONS_00014161";             |
| exon_number "3"; oId "CUFF.15054.2"; tss_id "TSS10578"; |                                                                    |
| chr11 Cufflinks exon 33183120 33183327 . + .            | gene_id "XLOC_008328"; transcript_id "TCONS_00014164";             |
| exon_number "1"; oId "CUFF.15054.4"; tss_id "TSS10578"; |                                                                    |
| chr11 Cufflinks exon 33200258 33200354 . + .            | gene_id "XLOC_008328"; transcript_id "TCONS_00014164";             |
| exon_number "2"; oId "CUFF.15054.4"; tss_id "TSS10578"; |                                                                    |
| chr11 Cufflinks exon 33210316 33210396 . + .            | gene_id "XLOC_008328"; transcript_id "TCONS_00014164";             |
| exon_number "3"; oId "CUFF.15054.4"; tss_id "TSS10578"; |                                                                    |
| chr11 Cufflinks exon 33210914 33211103 . + .            | gene_id "XLOC_008328"; transcript_id "TCONS_00014164";             |
| exon_number "4"; oId "CUFF.15054.4"; tss_id "TSS10578"; |                                                                    |
| chr11 Cufflinks exon 33211479 33213142 . + .            | gene_id "XLOC_008328"; transcript_id "TCONS_00014164";             |
| exon_number "5"; oId "CUFF.15054.4"; tss_id "TSS10578"; |                                                                    |
| chr11 Cufflinks exon 33183132 33183327 . + .            | gene_id "XLOC_008328"; transcript_id "TCONS_00014165";             |
| exon_number "1"; oId "CUFF.15054.5"; tss_id "TSS10578"; |                                                                    |
| chr11 Cufflinks exon 33200258 33200354 . + .            | gene_id "XLOC_008328"; transcript_id "TCONS_00014165";             |
| exon_number "2"; oId "CUFF.15054.5"; tss_id "TSS10578"; |                                                                    |
| chr11 Cufflinks exon 33210316 33210396 . + .            | gene_id "XLOC_008328"; transcript_id "TCONS_00014165";             |
| exon_number "3"; oId "CUFF.15054.5"; tss_id "TSS10578"; |                                                                    |
| chr11 Cufflinks exon33211479 33213142 . + .             | gene_id "XLOC_008328"; transcript_id "TCONS_00014165"; exon_number |
| "4"; oId "CUFF.15054.5"; tss_id "TSS10578";             |                                                                    |
| chr11 Cufflinks exon33183203 33183327 . + .             | gene_id "XLOC_008328"; transcript_id "TCONS_00014167"; exon_number |
| "1"; oId "CUFF.15054.9"; tss_id "TSS10579";             |                                                                    |
| chr11 Cufflinks exon33210316 33210396 . + .             | gene_id "XLOC_008328"; transcript_id "TCONS_00014167"; exon_number |
| "2"; oId "CUFF.15054.9"; tss_id "TSS10579";             |                                                                    |
| chr11 Cufflinks exon33210914 33211103 . + .             | gene_id "XLOC_008328"; transcript_id "TCONS_00014167"; exon_number |

|                                             |   |   |   |                                                                    |  |
|---------------------------------------------|---|---|---|--------------------------------------------------------------------|--|
| "3"; oId "CUFF.15054.9"; tss_id "TSS10579"; |   |   |   |                                                                    |  |
| chr11 Cufflinks exon33211479 33213142       | . | + | . | gene_id "XLOC_008328"; transcript_id "TCONS_00014167"; exon_number |  |
| "4"; oId "CUFF.15054.9"; tss_id "TSS10579"; |   |   |   |                                                                    |  |
| chr11 Cufflinks exon45376922 45377153       | . | + | . | gene_id "XLOC_008404"; transcript_id "TCONS_00014287"; exon_number |  |
| "1"; oId "CUFF.15264.1"; tss_id "TSS10672"; |   |   |   |                                                                    |  |
| chr11 Cufflinks exon45377430 45378208       | . | + | . | gene_id "XLOC_008404"; transcript_id "TCONS_00014287"; exon_number |  |
| "2"; oId "CUFF.15264.1"; tss_id "TSS10672"; |   |   |   |                                                                    |  |
| chr11 Cufflinks exon46867911 46868050       | . | + | . | gene_id "XLOC_008421"; transcript_id "TCONS_00014326"; exon_number |  |
| "1"; oId "CUFF.15322.1"; tss_id "TSS10700"; |   |   |   |                                                                    |  |
| chr11 Cufflinks exon46868161 46868268       | . | + | . | gene_id "XLOC_008421"; transcript_id "TCONS_00014326"; exon_number |  |
| "2"; oId "CUFF.15322.1"; tss_id "TSS10700"; |   |   |   |                                                                    |  |
| chr11 Cufflinks exon46874403 46874497       | . | + | . | gene_id "XLOC_008421"; transcript_id "TCONS_00014326"; exon_number |  |
| "3"; oId "CUFF.15322.1"; tss_id "TSS10700"; |   |   |   |                                                                    |  |
| chr11 Cufflinks exon46877098 46877396       | . | + | . | gene_id "XLOC_008421"; transcript_id "TCONS_00014326"; exon_number |  |
| "4"; oId "CUFF.15322.1"; tss_id "TSS10700"; |   |   |   |                                                                    |  |
| chr11 Cufflinks exon46867962 46868050       | . | + | . | gene_id "XLOC_008421"; transcript_id "TCONS_00014327"; exon_number |  |
| "1"; oId "CUFF.15322.2"; tss_id "TSS10700"; |   |   |   |                                                                    |  |
| chr11 Cufflinks exon46868161 46868268       | . | + | . | gene_id "XLOC_008421"; transcript_id "TCONS_00014327"; exon_number |  |
| "2"; oId "CUFF.15322.2"; tss_id "TSS10700"; |   |   |   |                                                                    |  |
| chr11 Cufflinks exon46894625 46895967       | . | + | . | gene_id "XLOC_008421"; transcript_id "TCONS_00014327"; exon_number |  |
| "3"; oId "CUFF.15322.2"; tss_id "TSS10700"; |   |   |   |                                                                    |  |
| chr11 Cufflinks exon57406110 57406145       | . | + | . | gene_id "XLOC_008446"; transcript_id "TCONS_00014367"; exon_number |  |
| "1"; oId "CUFF.15496.2"; tss_id "TSS10731"; |   |   |   |                                                                    |  |
| chr11 Cufflinks exon57406991 57417163       | . | + | . | gene_id "XLOC_008446"; transcript_id "TCONS_00014367"; exon_number |  |
| "2"; oId "CUFF.15496.2"; tss_id "TSS10731"; |   |   |   |                                                                    |  |
| chr11 Cufflinks exon57417771 57421117       | . | + | . | gene_id "XLOC_008446"; transcript_id "TCONS_00014367"; exon_number |  |
| "3"; oId "CUFF.15496.2"; tss_id "TSS10731"; |   |   |   |                                                                    |  |
| chr11 Cufflinks exon57408756 57409677       | . | + | . | gene_id "XLOC_008446"; transcript_id "TCONS_00014369"; exon_number |  |
| "1"; oId "CUFF.15496.4"; tss_id "TSS10732"; |   |   |   |                                                                    |  |
| chr11 Cufflinks exon57410743 57414493       | . | + | . | gene_id "XLOC_008446"; transcript_id "TCONS_00014369"; exon_number |  |
| "2"; oId "CUFF.15496.4"; tss_id "TSS10732"; |   |   |   |                                                                    |  |
| chr11 Cufflinks exon57415747 57415920       | . | + | . | gene_id "XLOC_008446"; transcript_id "TCONS_00014369"; exon_number |  |
| "3"; oId "CUFF.15496.4"; tss_id "TSS10732"; |   |   |   |                                                                    |  |
| chr11 Cufflinks exon57416099 57416124       | . | + | . | gene_id "XLOC_008446"; transcript_id "TCONS_00014369"; exon_number |  |
| "4"; oId "CUFF.15496.4"; tss_id "TSS10732"; |   |   |   |                                                                    |  |
| chr11 Cufflinks exon57408756 57409677       | . | + | . | gene_id "XLOC_008446"; transcript_id "TCONS_00014371"; exon_number |  |
| "1"; oId "CUFF.15496.5"; tss_id "TSS10732"; |   |   |   |                                                                    |  |
| chr11 Cufflinks exon57410743 57414493       | . | + | . | gene_id "XLOC_008446"; transcript_id "TCONS_00014371"; exon_number |  |
| "2"; oId "CUFF.15496.5"; tss_id "TSS10732"; |   |   |   |                                                                    |  |
| chr11 Cufflinks exon57415747 57415920       | . | + | . | gene_id "XLOC_008446"; transcript_id "TCONS_00014371"; exon_number |  |
| "3"; oId "CUFF.15496.5"; tss_id "TSS10732"; |   |   |   |                                                                    |  |
| chr11 Cufflinks exon57416313 57417026       | . | + | . | gene_id "XLOC_008446"; transcript_id "TCONS_00014371"; exon_number |  |
| "4"; oId "CUFF.15496.5"; tss_id "TSS10732"; |   |   |   |                                                                    |  |

|       |                        |          |   |   |   |                                                                                                                |
|-------|------------------------|----------|---|---|---|----------------------------------------------------------------------------------------------------------------|
| chr11 | Cufflinks exon57408756 | 57415920 | . | + | . | gene_id "XLOC_008446"; transcript_id "TCONS_00014370"; exon_number "1"; oId "CUFF.15496.3"; tss_id "TSS10732"; |
| chr11 | Cufflinks exon57416183 | 57417026 | . | + | . | gene_id "XLOC_008446"; transcript_id "TCONS_00014370"; exon_number "2"; oId "CUFF.15496.3"; tss_id "TSS10732"; |
| chr11 | Cufflinks exon57408756 | 57416595 | . | + | . | gene_id "XLOC_008446"; transcript_id "TCONS_00014372"; exon_number "1"; oId "CUFF.15496.6"; tss_id "TSS10732"; |
| chr11 | Cufflinks exon57417771 | 57419301 | . | + | . | gene_id "XLOC_008446"; transcript_id "TCONS_00014372"; exon_number "2"; oId "CUFF.15496.6"; tss_id "TSS10732"; |
| chr11 | Cufflinks exon57424049 | 57424524 | . | + | . | gene_id "XLOC_008446"; transcript_id "TCONS_00014372"; exon_number "3"; oId "CUFF.15496.6"; tss_id "TSS10732"; |
| chr11 | Cufflinks exon61266427 | 61267353 | . | + | . | gene_id "XLOC_008528"; transcript_id "TCONS_00014489"; exon_number "1"; oId "CUFF.15726.1"; tss_id "TSS10823"; |
| chr11 | Cufflinks exon61273234 | 61274117 | . | + | . | gene_id "XLOC_008528"; transcript_id "TCONS_00014489"; exon_number "2"; oId "CUFF.15726.1"; tss_id "TSS10823"; |
| chr11 | Cufflinks exon61266430 | 61266799 | . | + | . | gene_id "XLOC_008528"; transcript_id "TCONS_00014490"; exon_number "1"; oId "CUFF.15726.2"; tss_id "TSS10823"; |
| chr11 | Cufflinks exon61267235 | 61267368 | . | + | . | gene_id "XLOC_008528"; transcript_id "TCONS_00014490"; exon_number "2"; oId "CUFF.15726.2"; tss_id "TSS10823"; |
| chr11 | Cufflinks exon61273234 | 61274117 | . | + | . | gene_id "XLOC_008528"; transcript_id "TCONS_00014490"; exon_number "3"; oId "CUFF.15726.2"; tss_id "TSS10823"; |
| chr11 | Cufflinks exon61266431 | 61266799 | . | + | . | gene_id "XLOC_008528"; transcript_id "TCONS_00014493"; exon_number "1"; oId "CUFF.15726.5"; tss_id "TSS10823"; |
| chr11 | Cufflinks exon61267235 | 61267307 | . | + | . | gene_id "XLOC_008528"; transcript_id "TCONS_00014493"; exon_number "2"; oId "CUFF.15726.5"; tss_id "TSS10823"; |
| chr11 | Cufflinks exon61273234 | 61274117 | . | + | . | gene_id "XLOC_008528"; transcript_id "TCONS_00014493"; exon_number "3"; oId "CUFF.15726.5"; tss_id "TSS10823"; |
| chr11 | Cufflinks exon61266431 | 61266805 | . | + | . | gene_id "XLOC_008528"; transcript_id "TCONS_00014492"; exon_number "1"; oId "CUFF.15726.4"; tss_id "TSS10823"; |
| chr11 | Cufflinks exon61267235 | 61267307 | . | + | . | gene_id "XLOC_008528"; transcript_id "TCONS_00014492"; exon_number "2"; oId "CUFF.15726.4"; tss_id "TSS10823"; |
| chr11 | Cufflinks exon61273234 | 61274117 | . | + | . | gene_id "XLOC_008528"; transcript_id "TCONS_00014492"; exon_number "3"; oId "CUFF.15726.4"; tss_id "TSS10823"; |
| chr11 | Cufflinks exon61266431 | 61266799 | . | + | . | gene_id "XLOC_008528"; transcript_id "TCONS_00014491"; exon_number "1"; oId "CUFF.15726.3"; tss_id "TSS10823"; |
| chr11 | Cufflinks exon61267235 | 61267353 | . | + | . | gene_id "XLOC_008528"; transcript_id "TCONS_00014491"; exon_number "2"; oId "CUFF.15726.3"; tss_id "TSS10823"; |
| chr11 | Cufflinks exon61273234 | 61274117 | . | + | . | gene_id "XLOC_008528"; transcript_id "TCONS_00014491"; exon_number "3"; oId "CUFF.15726.3"; tss_id "TSS10823"; |
| chr11 | Cufflinks exon64013338 | 64013561 | . | + | . | gene_id "XLOC_008573"; transcript_id "TCONS_00014575"; exon_number "1"; oId "CUFF.15907.1"; tss_id "TSS10885"; |
| chr11 | Cufflinks exon64015425 | 64015686 | . | + | . | gene_id "XLOC_008573"; transcript_id "TCONS_00014575"; exon_number "2"; oId "CUFF.15907.1"; tss_id "TSS10885"; |
| chr11 | Cufflinks exon64014526 | 64014731 | . | + | . | gene_id "XLOC_008573"; transcript_id "TCONS_00014576"; exon_number "1"; oId "CUFF.15907.1"; tss_id "TSS10885"; |

|                                             |   |   |   |                                                                    |  |
|---------------------------------------------|---|---|---|--------------------------------------------------------------------|--|
| "1"; oId "CUFF.15907.2"; tss_id "TSS10886"; |   |   |   |                                                                    |  |
| chr11 Cufflinks exon64015425 64015686       | . | + | . | gene_id "XLOC_008573"; transcript_id "TCONS_00014576"; exon_number |  |
| "2"; oId "CUFF.15907.2"; tss_id "TSS10886"; |   |   |   |                                                                    |  |
| chr11 Cufflinks exon65189823 65198277       | . | + | . | gene_id "XLOC_008611"; transcript_id "TCONS_00014650"; exon_number |  |
| "1"; oId "CUFF.16011.1"; tss_id "TSS10938"; |   |   |   |                                                                    |  |
| chr11 Cufflinks exon65201954 65204137       | . | + | . | gene_id "XLOC_008611"; transcript_id "TCONS_00014650"; exon_number |  |
| "2"; oId "CUFF.16011.1"; tss_id "TSS10938"; |   |   |   |                                                                    |  |
| chr11 Cufflinks exon65205043 65205128       | . | + | . | gene_id "XLOC_008611"; transcript_id "TCONS_00014650"; exon_number |  |
| "3"; oId "CUFF.16011.1"; tss_id "TSS10938"; |   |   |   |                                                                    |  |
| chr11 Cufflinks exon65211421 65213009       | . | + | . | gene_id "XLOC_008611"; transcript_id "TCONS_00014650"; exon_number |  |
| "4"; oId "CUFF.16011.1"; tss_id "TSS10938"; |   |   |   |                                                                    |  |
| chr11 Cufflinks exon65265168 65271677       | . | + | . | gene_id "XLOC_008614"; transcript_id "TCONS_00014656"; exon_number |  |
| "1"; oId "CUFF.16024.3"; tss_id "TSS10942"; |   |   |   |                                                                    |  |
| chr11 Cufflinks exon65271797 65273133       | . | + | . | gene_id "XLOC_008614"; transcript_id "TCONS_00014656"; exon_number |  |
| "2"; oId "CUFF.16024.3"; tss_id "TSS10942"; |   |   |   |                                                                    |  |
| chr11 Cufflinks exon65273857 65273983       | . | + | . | gene_id "XLOC_008614"; transcript_id "TCONS_00014656"; exon_number |  |
| "3"; oId "CUFF.16024.3"; tss_id "TSS10942"; |   |   |   |                                                                    |  |
| chr11 Cufflinks exon65265168 65271677       | . | + | . | gene_id "XLOC_008614"; transcript_id "TCONS_00014655"; exon_number |  |
| "1"; oId "CUFF.16024.2"; tss_id "TSS10942"; |   |   |   |                                                                    |  |
| chr11 Cufflinks exon65271797 65273983       | . | + | . | gene_id "XLOC_008614"; transcript_id "TCONS_00014655"; exon_number |  |
| "2"; oId "CUFF.16024.2"; tss_id "TSS10942"; |   |   |   |                                                                    |  |
| chr11 Cufflinks exon65265168 65269864       | . | + | . | gene_id "XLOC_008614"; transcript_id "TCONS_00014654"; exon_number |  |
| "1"; oId "CUFF.16024.1"; tss_id "TSS10942"; |   |   |   |                                                                    |  |
| chr11 Cufflinks exon65270108 65272490       | . | + | . | gene_id "XLOC_008614"; transcript_id "TCONS_00014654"; exon_number |  |
| "2"; oId "CUFF.16024.1"; tss_id "TSS10942"; |   |   |   |                                                                    |  |
| chr11 Cufflinks exon65272975 65273983       | . | + | . | gene_id "XLOC_008614"; transcript_id "TCONS_00014654"; exon_number |  |
| "3"; oId "CUFF.16024.1"; tss_id "TSS10942"; |   |   |   |                                                                    |  |
| chr11 Cufflinks exon65430476 65430619       | . | + | . | gene_id "XLOC_008626"; transcript_id "TCONS_00014672"; exon_number |  |
| "1"; oId "CUFF.16048.2"; tss_id "TSS10954"; |   |   |   |                                                                    |  |
| chr11 Cufflinks exon65430898 65431154       | . | + | . | gene_id "XLOC_008626"; transcript_id "TCONS_00014672"; exon_number |  |
| "2"; oId "CUFF.16048.2"; tss_id "TSS10954"; |   |   |   |                                                                    |  |
| chr11 Cufflinks exon65438894 65439189       | . | + | . | gene_id "XLOC_008626"; transcript_id "TCONS_00014672"; exon_number |  |
| "3"; oId "CUFF.16048.2"; tss_id "TSS10954"; |   |   |   |                                                                    |  |
| chr11 Cufflinks exon66115191 66115422       | . | + | . | gene_id "XLOC_008650"; transcript_id "TCONS_00014710"; exon_number |  |
| "1"; oId "CUFF.16150.1"; tss_id "TSS10984"; |   |   |   |                                                                    |  |
| chr11 Cufflinks exon66120926 66121086       | . | + | . | gene_id "XLOC_008650"; transcript_id "TCONS_00014710"; exon_number |  |
| "2"; oId "CUFF.16150.1"; tss_id "TSS10984"; |   |   |   |                                                                    |  |
| chr11 Cufflinks exon66128122 66128215       | . | + | . | gene_id "XLOC_008650"; transcript_id "TCONS_00014710"; exon_number |  |
| "3"; oId "CUFF.16150.1"; tss_id "TSS10984"; |   |   |   |                                                                    |  |
| chr11 Cufflinks exon66130740 66137010       | . | + | . | gene_id "XLOC_008650"; transcript_id "TCONS_00014710"; exon_number |  |
| "4"; oId "CUFF.16150.1"; tss_id "TSS10984"; |   |   |   |                                                                    |  |
| chr11 Cufflinks exon66137133 66137264       | . | + | . | gene_id "XLOC_008650"; transcript_id "TCONS_00014710"; exon_number |  |
| "5"; oId "CUFF.16150.1"; tss_id "TSS10984"; |   |   |   |                                                                    |  |

|       |                        |          |   |   |   |                                                                                                                 |
|-------|------------------------|----------|---|---|---|-----------------------------------------------------------------------------------------------------------------|
| chr11 | Cufflinks exon66115211 | 66115541 | . | + | . | gene_id "XLOC_008650"; transcript_id "TCONS_00014711"; exon_number "1"; oId "CUFF.16150.5"; tss_id "TSS10984";  |
| chr11 | Cufflinks exon66120926 | 66121086 | . | + | . | gene_id "XLOC_008650"; transcript_id "TCONS_00014711"; exon_number "2"; oId "CUFF.16150.5"; tss_id "TSS10984";  |
| chr11 | Cufflinks exon66128122 | 66128215 | . | + | . | gene_id "XLOC_008650"; transcript_id "TCONS_00014711"; exon_number "3"; oId "CUFF.16150.5"; tss_id "TSS10984";  |
| chr11 | Cufflinks exon66130740 | 66137264 | . | + | . | gene_id "XLOC_008650"; transcript_id "TCONS_00014711"; exon_number "4"; oId "CUFF.16150.5"; tss_id "TSS10984";  |
| chr11 | Cufflinks exon66120655 | 66121086 | . | + | . | gene_id "XLOC_008650"; transcript_id "TCONS_00014717"; exon_number "1"; oId "CUFF.16150.9"; tss_id "TSS10988";  |
| chr11 | Cufflinks exon66128122 | 66128215 | . | + | . | gene_id "XLOC_008650"; transcript_id "TCONS_00014717"; exon_number "2"; oId "CUFF.16150.9"; tss_id "TSS10988";  |
| chr11 | Cufflinks exon66130740 | 66137264 | . | + | . | gene_id "XLOC_008650"; transcript_id "TCONS_00014717"; exon_number "3"; oId "CUFF.16150.9"; tss_id "TSS10988";  |
| chr11 | Cufflinks exon66128280 | 66129805 | . | + | . | gene_id "XLOC_008650"; transcript_id "TCONS_00014718"; exon_number "1"; oId "CUFF.16150.10"; tss_id "TSS10989"; |
| chr11 | Cufflinks exon66130740 | 66137320 | . | + | . | gene_id "XLOC_008650"; transcript_id "TCONS_00014718"; exon_number "2"; oId "CUFF.16150.10"; tss_id "TSS10989"; |
| chr11 | Cufflinks exon66142556 | 66142743 | . | + | . | gene_id "XLOC_008650"; transcript_id "TCONS_00014718"; exon_number "3"; oId "CUFF.16150.10"; tss_id "TSS10989"; |
| chr11 | Cufflinks exon66128448 | 66137010 | . | + | . | gene_id "XLOC_008650"; transcript_id "TCONS_00014719"; exon_number "1"; oId "CUFF.16150.11"; tss_id "TSS10990"; |
| chr11 | Cufflinks exon66137133 | 66137264 | . | + | . | gene_id "XLOC_008650"; transcript_id "TCONS_00014719"; exon_number "2"; oId "CUFF.16150.11"; tss_id "TSS10990"; |
| chr11 | Cufflinks exon66176178 | 66176933 | . | + | . | gene_id "XLOC_008653"; transcript_id "TCONS_00014721"; exon_number "1"; oId "CUFF.16159.3"; tss_id "TSS10993";  |
| chr11 | Cufflinks exon66177336 | 66177519 | . | + | . | gene_id "XLOC_008653"; transcript_id "TCONS_00014721"; exon_number "2"; oId "CUFF.16159.3"; tss_id "TSS10993";  |
| chr11 | Cufflinks exon66177624 | 66178444 | . | + | . | gene_id "XLOC_008653"; transcript_id "TCONS_00014721"; exon_number "3"; oId "CUFF.16159.3"; tss_id "TSS10993";  |
| chr11 | Cufflinks exon66184264 | 66184691 | . | + | . | gene_id "XLOC_008653"; transcript_id "TCONS_00014721"; exon_number "4"; oId "CUFF.16159.3"; tss_id "TSS10993";  |
| chr11 | Cufflinks exon66176623 | 66176933 | . | + | . | gene_id "XLOC_008653"; transcript_id "TCONS_00014724"; exon_number "1"; oId "CUFF.16159.5"; tss_id "TSS10994";  |
| chr11 | Cufflinks exon66177331 | 66177519 | . | + | . | gene_id "XLOC_008653"; transcript_id "TCONS_00014724"; exon_number "2"; oId "CUFF.16159.5"; tss_id "TSS10994";  |
| chr11 | Cufflinks exon66177624 | 66178444 | . | + | . | gene_id "XLOC_008653"; transcript_id "TCONS_00014724"; exon_number "3"; oId "CUFF.16159.5"; tss_id "TSS10994";  |
| chr11 | Cufflinks exon66184264 | 66184691 | . | + | . | gene_id "XLOC_008653"; transcript_id "TCONS_00014724"; exon_number "4"; oId "CUFF.16159.5"; tss_id "TSS10994";  |
| chr11 | Cufflinks exon66176623 | 66178444 | . | + | . | gene_id "XLOC_008653"; transcript_id "TCONS_00014723"; exon_number "1"; oId "CUFF.16159.4"; tss_id "TSS10994";  |
| chr11 | Cufflinks exon66184264 | 66184691 | . | + | . | gene_id "XLOC_008653"; transcript_id "TCONS_00014723"; exon_number "2"; oId "CUFF.16159.4"; tss_id "TSS10994";  |

"2"; oId "CUFF.16159.4"; tss\_id "TSS10994";  
chr11 Cufflinks exon66176638 66176933 . + . gene\_id "XLOC\_008653"; transcript\_id "TCONS\_00014725"; exon\_number  
"1"; oId "CUFF.16159.6"; tss\_id "TSS10994";  
chr11 Cufflinks exon66177336 66178444 . + . gene\_id "XLOC\_008653"; transcript\_id "TCONS\_00014725"; exon\_number  
"2"; oId "CUFF.16159.6"; tss\_id "TSS10994";  
chr11 Cufflinks exon66188263 66188318 . + . gene\_id "XLOC\_008653"; transcript\_id "TCONS\_00014725"; exon\_number  
"3"; oId "CUFF.16159.6"; tss\_id "TSS10994";  
chr11 Cufflinks exon66176771 66176933 . + . gene\_id "XLOC\_008653"; transcript\_id "TCONS\_00014726"; exon\_number  
"1"; oId "CUFF.16159.7"; tss\_id "TSS10995";  
chr11 Cufflinks exon66177624 66178444 . + . gene\_id "XLOC\_008653"; transcript\_id "TCONS\_00014726"; exon\_number  
"2"; oId "CUFF.16159.7"; tss\_id "TSS10995";  
chr11 Cufflinks exon66184264 66184691 . + . gene\_id "XLOC\_008653"; transcript\_id "TCONS\_00014726"; exon\_number  
"3"; oId "CUFF.16159.7"; tss\_id "TSS10995";  
chr11 Cufflinks exon67084976 67085668 . + . gene\_id "XLOC\_008692"; transcript\_id "TCONS\_00014789"; exon\_number  
"1"; oId "CUFF.16268.1"; tss\_id "TSS11048";  
chr11 Cufflinks exon67088741 67088804 . + . gene\_id "XLOC\_008692"; transcript\_id "TCONS\_00014789"; exon\_number  
"2"; oId "CUFF.16268.1"; tss\_id "TSS11048";  
chr11 Cufflinks exon67098341 67098596 . + . gene\_id "XLOC\_008692"; transcript\_id "TCONS\_00014789"; exon\_number  
"3"; oId "CUFF.16268.1"; tss\_id "TSS11048";  
chr11 Cufflinks exon67085310 67085668 . + . gene\_id "XLOC\_008692"; transcript\_id "TCONS\_00014790"; exon\_number  
"1"; oId "CUFF.16268.2"; tss\_id "TSS11049";  
chr11 Cufflinks exon67088741 67088804 . + . gene\_id "XLOC\_008692"; transcript\_id "TCONS\_00014790"; exon\_number  
"2"; oId "CUFF.16268.2"; tss\_id "TSS11049";  
chr11 Cufflinks exon67155006 67155142 . + . gene\_id "XLOC\_008692"; transcript\_id "TCONS\_00014790"; exon\_number  
"3"; oId "CUFF.16268.2"; tss\_id "TSS11049";  
chr11 Cufflinks exon67158869 67159158 . + . gene\_id "XLOC\_008692"; transcript\_id "TCONS\_00014790"; exon\_number  
"4"; oId "CUFF.16268.2"; tss\_id "TSS11049";  
chr11 Cufflinks exon69079950 69080785 . + . gene\_id "XLOC\_008738"; transcript\_id "TCONS\_00014864"; exon\_number  
"1"; oId "CUFF.16448.7"; tss\_id "TSS11107";  
chr11 Cufflinks exon69084301 69084392 . + . gene\_id "XLOC\_008738"; transcript\_id "TCONS\_00014864"; exon\_number  
"2"; oId "CUFF.16448.7"; tss\_id "TSS11107";  
chr11 Cufflinks exon69150244 69150530 . + . gene\_id "XLOC\_008738"; transcript\_id "TCONS\_00014864"; exon\_number  
"3"; oId "CUFF.16448.7"; tss\_id "TSS11107";  
chr11 Cufflinks exon69079995 69080785 . + . gene\_id "XLOC\_008738"; transcript\_id "TCONS\_00014865"; exon\_number  
"1"; oId "CUFF.16448.8"; tss\_id "TSS11107";  
chr11 Cufflinks exon69084301 69084392 . + . gene\_id "XLOC\_008738"; transcript\_id "TCONS\_00014865"; exon\_number  
"2"; oId "CUFF.16448.8"; tss\_id "TSS11107";  
chr11 Cufflinks exon69156278 69156429 . + . gene\_id "XLOC\_008738"; transcript\_id "TCONS\_00014865"; exon\_number  
"3"; oId "CUFF.16448.8"; tss\_id "TSS11107";  
chr11 Cufflinks exon69080288 69080783 . + . gene\_id "XLOC\_008738"; transcript\_id "TCONS\_00014866"; exon\_number  
"1"; oId "CUFF.16448.9"; tss\_id "TSS11108";  
chr11 Cufflinks exon69084301 69084392 . + . gene\_id "XLOC\_008738"; transcript\_id "TCONS\_00014866"; exon\_number  
"2"; oId "CUFF.16448.9"; tss\_id "TSS11108";



|       |                        |          |   |   |   |                                                                                                                |
|-------|------------------------|----------|---|---|---|----------------------------------------------------------------------------------------------------------------|
| chr11 | Cufflinks exon69156278 | 69156429 | . | + | . | gene_id "XLOC_008738"; transcript_id "TCONS_00014866"; exon_number "3"; oId "CUFF.16448.9"; tss_id "TSS11108"; |
| chr11 | Cufflinks exon71214354 | 71214680 | . | + | . | gene_id "XLOC_008753"; transcript_id "TCONS_00014889"; exon_number "1"; oId "CUFF.16495.2"; tss_id "TSS11126"; |
| chr11 | Cufflinks exon71215055 | 71216556 | . | + | . | gene_id "XLOC_008753"; transcript_id "TCONS_00014889"; exon_number "2"; oId "CUFF.16495.2"; tss_id "TSS11126"; |
| chr11 | Cufflinks exon75237146 | 75237218 | . | + | . | gene_id "XLOC_008814"; transcript_id "TCONS_00014993"; exon_number "1"; oId "CUFF.16717.1"; tss_id "TSS11203"; |
| chr11 | Cufflinks exon75237816 | 75243811 | . | + | . | gene_id "XLOC_008814"; transcript_id "TCONS_00014993"; exon_number "2"; oId "CUFF.16717.1"; tss_id "TSS11203"; |
| chr11 | Cufflinks exon82783108 | 82783188 | . | + | . | gene_id "XLOC_008838"; transcript_id "TCONS_00015050"; exon_number "1"; oId "CUFF.16879.3"; tss_id "TSS11235"; |
| chr11 | Cufflinks exon82783665 | 82783846 | . | + | . | gene_id "XLOC_008838"; transcript_id "TCONS_00015050"; exon_number "2"; oId "CUFF.16879.3"; tss_id "TSS11235"; |
| chr11 | Cufflinks exon82784345 | 82805485 | . | + | . | gene_id "XLOC_008838"; transcript_id "TCONS_00015050"; exon_number "3"; oId "CUFF.16879.3"; tss_id "TSS11235"; |
| chr11 | Cufflinks exon82783108 | 82783223 | . | + | . | gene_id "XLOC_008838"; transcript_id "TCONS_00015051"; exon_number "1"; oId "CUFF.16879.4"; tss_id "TSS11235"; |
| chr11 | Cufflinks exon82783665 | 82783846 | . | + | . | gene_id "XLOC_008838"; transcript_id "TCONS_00015051"; exon_number "2"; oId "CUFF.16879.4"; tss_id "TSS11235"; |
| chr11 | Cufflinks exon82784345 | 82805485 | . | + | . | gene_id "XLOC_008838"; transcript_id "TCONS_00015051"; exon_number "3"; oId "CUFF.16879.4"; tss_id "TSS11235"; |
| chr11 | Cufflinks exon82783108 | 82783188 | . | + | . | gene_id "XLOC_008838"; transcript_id "TCONS_00015049"; exon_number "1"; oId "CUFF.16879.2"; tss_id "TSS11235"; |
| chr11 | Cufflinks exon82783665 | 82783846 | . | + | . | gene_id "XLOC_008838"; transcript_id "TCONS_00015049"; exon_number "2"; oId "CUFF.16879.2"; tss_id "TSS11235"; |
| chr11 | Cufflinks exon82784345 | 82792842 | . | + | . | gene_id "XLOC_008838"; transcript_id "TCONS_00015049"; exon_number "3"; oId "CUFF.16879.2"; tss_id "TSS11235"; |
| chr11 | Cufflinks exon82802295 | 82805485 | . | + | . | gene_id "XLOC_008838"; transcript_id "TCONS_00015049"; exon_number "4"; oId "CUFF.16879.2"; tss_id "TSS11235"; |
| chr11 | Cufflinks exon82783108 | 82783188 | . | + | . | gene_id "XLOC_008838"; transcript_id "TCONS_00015048"; exon_number "1"; oId "CUFF.16879.1"; tss_id "TSS11235"; |
| chr11 | Cufflinks exon82783665 | 82783744 | . | + | . | gene_id "XLOC_008838"; transcript_id "TCONS_00015048"; exon_number "2"; oId "CUFF.16879.1"; tss_id "TSS11235"; |
| chr11 | Cufflinks exon82784345 | 82784489 | . | + | . | gene_id "XLOC_008838"; transcript_id "TCONS_00015048"; exon_number "3"; oId "CUFF.16879.1"; tss_id "TSS11235"; |
| chr11 | Cufflinks exon82792577 | 82805485 | . | + | . | gene_id "XLOC_008838"; transcript_id "TCONS_00015048"; exon_number "4"; oId "CUFF.16879.1"; tss_id "TSS11235"; |
| chr11 | Cufflinks exon88071022 | 88071224 | . | + | . | gene_id "XLOC_008877"; transcript_id "TCONS_00015116"; exon_number "1"; oId "CUFF.17047.1"; tss_id "TSS11278"; |
| chr11 | Cufflinks exon88106405 | 88106495 | . | + | . | gene_id "XLOC_008877"; transcript_id "TCONS_00015116"; exon_number "2"; oId "CUFF.17047.1"; tss_id "TSS11278"; |
| chr11 | Cufflinks exon88156655 | 88156765 | . | + | . | gene_id "XLOC_008877"; transcript_id "TCONS_00015116"; exon_number "3"; oId "CUFF.17047.1"; tss_id "TSS11278"; |

"3"; oId "CUFF.17047.1"; tss\_id "TSS11278";  
chr11 Cufflinks exon88157549 88160451 . + . gene\_id "XLOC\_008877"; transcript\_id "TCONS\_00015116"; exon\_number  
"4"; oId "CUFF.17047.1"; tss\_id "TSS11278";  
chr11 Cufflinks exon88160946 88161510 . + . gene\_id "XLOC\_008877"; transcript\_id "TCONS\_00015116"; exon\_number  
"5"; oId "CUFF.17047.1"; tss\_id "TSS11278";  
chr11 Cufflinks exon88071025 88071224 . + . gene\_id "XLOC\_008877"; transcript\_id "TCONS\_00015117"; exon\_number  
"1"; oId "CUFF.17047.2"; tss\_id "TSS11278";  
chr11 Cufflinks exon88106405 88106495 . + . gene\_id "XLOC\_008877"; transcript\_id "TCONS\_00015117"; exon\_number  
"2"; oId "CUFF.17047.2"; tss\_id "TSS11278";  
chr11 Cufflinks exon88132850 88133876 . + . gene\_id "XLOC\_008877"; transcript\_id "TCONS\_00015117"; exon\_number  
"3"; oId "CUFF.17047.2"; tss\_id "TSS11278";  
chr11 Cufflinks exon88071025 88071225 . + . gene\_id "XLOC\_008877"; transcript\_id "TCONS\_00015118"; exon\_number  
"1"; oId "CUFF.17047.3"; tss\_id "TSS11278";  
chr11 Cufflinks exon88106405 88106495 . + . gene\_id "XLOC\_008877"; transcript\_id "TCONS\_00015118"; exon\_number  
"2"; oId "CUFF.17047.3"; tss\_id "TSS11278";  
chr11 Cufflinks exon88156655 88156765 . + . gene\_id "XLOC\_008877"; transcript\_id "TCONS\_00015118"; exon\_number  
"3"; oId "CUFF.17047.3"; tss\_id "TSS11278";  
chr11 Cufflinks exon88157549 88159221 . + . gene\_id "XLOC\_008877"; transcript\_id "TCONS\_00015118"; exon\_number  
"4"; oId "CUFF.17047.3"; tss\_id "TSS11278";  
chr11 Cufflinks exon88071132 88071230 . + . gene\_id "XLOC\_008877"; transcript\_id "TCONS\_00015119"; exon\_number  
"1"; oId "CUFF.17047.4"; tss\_id "TSS11279";  
chr11 Cufflinks exon88106405 88106495 . + . gene\_id "XLOC\_008877"; transcript\_id "TCONS\_00015119"; exon\_number  
"2"; oId "CUFF.17047.4"; tss\_id "TSS11279";  
chr11 Cufflinks exon88156655 88156772 . + . gene\_id "XLOC\_008877"; transcript\_id "TCONS\_00015119"; exon\_number  
"3"; oId "CUFF.17047.4"; tss\_id "TSS11279";  
chr11 Cufflinks exon88157549 88160451 . + . gene\_id "XLOC\_008877"; transcript\_id "TCONS\_00015119"; exon\_number  
"4"; oId "CUFF.17047.4"; tss\_id "TSS11279";  
chr11 Cufflinks exon88160946 88161510 . + . gene\_id "XLOC\_008877"; transcript\_id "TCONS\_00015119"; exon\_number  
"5"; oId "CUFF.17047.4"; tss\_id "TSS11279";  
chr11 Cufflinks exon88071136 88071225 . + . gene\_id "XLOC\_008877"; transcript\_id "TCONS\_00015120"; exon\_number  
"1"; oId "CUFF.17047.5"; tss\_id "TSS11279";  
chr11 Cufflinks exon88106405 88106495 . + . gene\_id "XLOC\_008877"; transcript\_id "TCONS\_00015120"; exon\_number  
"2"; oId "CUFF.17047.5"; tss\_id "TSS11279";  
chr11 Cufflinks exon88156655 88156765 . + . gene\_id "XLOC\_008877"; transcript\_id "TCONS\_00015120"; exon\_number  
"3"; oId "CUFF.17047.5"; tss\_id "TSS11279";  
chr11 Cufflinks exon88157549 88157782 . + . gene\_id "XLOC\_008877"; transcript\_id "TCONS\_00015120"; exon\_number  
"4"; oId "CUFF.17047.5"; tss\_id "TSS11279";  
chr11 Cufflinks exon88160943 88161510 . + . gene\_id "XLOC\_008877"; transcript\_id "TCONS\_00015120"; exon\_number  
"5"; oId "CUFF.17047.5"; tss\_id "TSS11279";  
chr11 Cufflinks exon88071144 88071224 . + . gene\_id "XLOC\_008877"; transcript\_id "TCONS\_00015121"; exon\_number  
"1"; oId "CUFF.17047.6"; tss\_id "TSS11279";  
chr11 Cufflinks exon88106405 88106495 . + . gene\_id "XLOC\_008877"; transcript\_id "TCONS\_00015121"; exon\_number  
"2"; oId "CUFF.17047.6"; tss\_id "TSS11279";

|       |                        |          |   |   |   |                                                                                                                 |
|-------|------------------------|----------|---|---|---|-----------------------------------------------------------------------------------------------------------------|
| chr11 | Cufflinks exon88156655 | 88156765 | . | + | . | gene_id "XLOC_008877"; transcript_id "TCONS_00015121"; exon_number "3"; oId "CUFF.17047.6"; tss_id "TSS11279";  |
| chr11 | Cufflinks exon88157549 | 88157782 | . | + | . | gene_id "XLOC_008877"; transcript_id "TCONS_00015121"; exon_number "4"; oId "CUFF.17047.6"; tss_id "TSS11279";  |
| chr11 | Cufflinks exon88161075 | 88161510 | . | + | . | gene_id "XLOC_008877"; transcript_id "TCONS_00015121"; exon_number "5"; oId "CUFF.17047.6"; tss_id "TSS11279";  |
| chr11 | Cufflinks exon88106871 | 88106986 | . | + | . | gene_id "XLOC_008877"; transcript_id "TCONS_00015127"; exon_number "1"; oId "CUFF.17047.7"; tss_id "TSS11280";  |
| chr11 | Cufflinks exon88156655 | 88156765 | . | + | . | gene_id "XLOC_008877"; transcript_id "TCONS_00015127"; exon_number "2"; oId "CUFF.17047.7"; tss_id "TSS11280";  |
| chr11 | Cufflinks exon88157549 | 88157782 | . | + | . | gene_id "XLOC_008877"; transcript_id "TCONS_00015127"; exon_number "3"; oId "CUFF.17047.7"; tss_id "TSS11280";  |
| chr11 | Cufflinks exon88160199 | 88160451 | . | + | . | gene_id "XLOC_008877"; transcript_id "TCONS_00015127"; exon_number "4"; oId "CUFF.17047.7"; tss_id "TSS11280";  |
| chr11 | Cufflinks exon88160946 | 88161510 | . | + | . | gene_id "XLOC_008877"; transcript_id "TCONS_00015127"; exon_number "5"; oId "CUFF.17047.7"; tss_id "TSS11280";  |
| chr11 | Cufflinks exon88132872 | 88133240 | . | + | . | gene_id "XLOC_008877"; transcript_id "TCONS_00015129"; exon_number "1"; oId "CUFF.17047.8"; tss_id "TSS11281";  |
| chr11 | Cufflinks exon88144049 | 88145196 | . | + | . | gene_id "XLOC_008877"; transcript_id "TCONS_00015129"; exon_number "2"; oId "CUFF.17047.8"; tss_id "TSS11281";  |
| chr11 | Cufflinks exon88133135 | 88133240 | . | + | . | gene_id "XLOC_008877"; transcript_id "TCONS_00015130"; exon_number "1"; oId "CUFF.17047.9"; tss_id "TSS11282";  |
| chr11 | Cufflinks exon88156655 | 88156765 | . | + | . | gene_id "XLOC_008877"; transcript_id "TCONS_00015130"; exon_number "2"; oId "CUFF.17047.9"; tss_id "TSS11282";  |
| chr11 | Cufflinks exon88157549 | 88157782 | . | + | . | gene_id "XLOC_008877"; transcript_id "TCONS_00015130"; exon_number "3"; oId "CUFF.17047.9"; tss_id "TSS11282";  |
| chr11 | Cufflinks exon88160199 | 88161510 | . | + | . | gene_id "XLOC_008877"; transcript_id "TCONS_00015130"; exon_number "4"; oId "CUFF.17047.9"; tss_id "TSS11282";  |
| chr11 | Cufflinks exon88133209 | 88133240 | . | + | . | gene_id "XLOC_008877"; transcript_id "TCONS_00015131"; exon_number "1"; oId "CUFF.17047.10"; tss_id "TSS11282"; |
| chr11 | Cufflinks exon88156655 | 88156765 | . | + | . | gene_id "XLOC_008877"; transcript_id "TCONS_00015131"; exon_number "2"; oId "CUFF.17047.10"; tss_id "TSS11282"; |
| chr11 | Cufflinks exon88157549 | 88157782 | . | + | . | gene_id "XLOC_008877"; transcript_id "TCONS_00015131"; exon_number "3"; oId "CUFF.17047.10"; tss_id "TSS11282"; |
| chr11 | Cufflinks exon88161075 | 88161510 | . | + | . | gene_id "XLOC_008877"; transcript_id "TCONS_00015131"; exon_number "4"; oId "CUFF.17047.10"; tss_id "TSS11282"; |
| chr11 | Cufflinks exon88157719 | 88157782 | . | + | . | gene_id "XLOC_008877"; transcript_id "TCONS_00015138"; exon_number "1"; oId "CUFF.17047.11"; tss_id "TSS11283"; |
| chr11 | Cufflinks exon88160946 | 88161510 | . | + | . | gene_id "XLOC_008877"; transcript_id "TCONS_00015138"; exon_number "2"; oId "CUFF.17047.11"; tss_id "TSS11283"; |
| chr11 | Cufflinks exon88160045 | 88160451 | . | + | . | gene_id "XLOC_008877"; transcript_id "TCONS_00015139"; exon_number "1"; oId "CUFF.17047.12"; tss_id "TSS11284"; |
| chr11 | Cufflinks exon88160943 | 88161510 | . | + | . | gene_id "XLOC_008877"; transcript_id "TCONS_00015139"; exon_number "2"; oId "CUFF.17047.12"; tss_id "TSS11284"; |

|                                              |   |   |   |                                                                    |  |
|----------------------------------------------|---|---|---|--------------------------------------------------------------------|--|
| "2"; oId "CUFF.17047.12"; tss_id "TSS11284"; |   |   |   |                                                                    |  |
| chr11 Cufflinks exon94963350 94963659        | . | + | . | gene_id "XLOC_008928"; transcript_id "TCONS_00015199"; exon_number |  |
| "1"; oId "CUFF.17213.1"; tss_id "TSS11341";  |   |   |   |                                                                    |  |
| chr11 Cufflinks exon94964289 94964737        | . | + | . | gene_id "XLOC_008928"; transcript_id "TCONS_00015199"; exon_number |  |
| "2"; oId "CUFF.17213.1"; tss_id "TSS11341";  |   |   |   |                                                                    |  |
| chr11 Cufflinks exon94965216 94965340        | . | + | . | gene_id "XLOC_008928"; transcript_id "TCONS_00015199"; exon_number |  |
| "3"; oId "CUFF.17213.1"; tss_id "TSS11341";  |   |   |   |                                                                    |  |
| chr11 Cufflinks exon94965754 94965838        | . | + | . | gene_id "XLOC_008928"; transcript_id "TCONS_00015199"; exon_number |  |
| "4"; oId "CUFF.17213.1"; tss_id "TSS11341";  |   |   |   |                                                                    |  |
| chr11 Cufflinks exon94966044 94966083        | . | + | . | gene_id "XLOC_008928"; transcript_id "TCONS_00015199"; exon_number |  |
| "5"; oId "CUFF.17213.1"; tss_id "TSS11341";  |   |   |   |                                                                    |  |
| chr11 Cufflinks exon94966618 94967568        | . | + | . | gene_id "XLOC_008928"; transcript_id "TCONS_00015199"; exon_number |  |
| "6"; oId "CUFF.17213.1"; tss_id "TSS11341";  |   |   |   |                                                                    |  |
| chr11 Cufflinks exon112160952 112161232      | . | + | . | gene_id "XLOC_008998"; transcript_id "TCONS_00015327"; exon_number |  |
| "1"; oId "CUFF.17493.1"; tss_id "TSS11426";  |   |   |   |                                                                    |  |
| chr11 Cufflinks exon112162043 112162460      | . | + | . | gene_id "XLOC_008998"; transcript_id "TCONS_00015327"; exon_number |  |
| "2"; oId "CUFF.17493.1"; tss_id "TSS11426";  |   |   |   |                                                                    |  |
| chr11 Cufflinks exon112367327 112367408      | . | + | . | gene_id "XLOC_009000"; transcript_id "TCONS_00015329"; exon_number |  |
| "1"; oId "CUFF.17503.2"; tss_id "TSS11428";  |   |   |   |                                                                    |  |
| chr11 Cufflinks exon112412016 112412129      | . | + | . | gene_id "XLOC_009000"; transcript_id "TCONS_00015329"; exon_number |  |
| "2"; oId "CUFF.17503.2"; tss_id "TSS11428";  |   |   |   |                                                                    |  |
| chr11 Cufflinks exon112494537 112495492      | . | + | . | gene_id "XLOC_009000"; transcript_id "TCONS_00015329"; exon_number |  |
| "3"; oId "CUFF.17503.2"; tss_id "TSS11428";  |   |   |   |                                                                    |  |
| chr11 Cufflinks exon112391222 112391292      | . | + | . | gene_id "XLOC_009000"; transcript_id "TCONS_00015330"; exon_number |  |
| "1"; oId "CUFF.17503.3"; tss_id "TSS11429";  |   |   |   |                                                                    |  |
| chr11 Cufflinks exon112412016 112412157      | . | + | . | gene_id "XLOC_009000"; transcript_id "TCONS_00015330"; exon_number |  |
| "2"; oId "CUFF.17503.3"; tss_id "TSS11429";  |   |   |   |                                                                    |  |
| chr11 Cufflinks exon112494537 112495492      | . | + | . | gene_id "XLOC_009000"; transcript_id "TCONS_00015330"; exon_number |  |
| "3"; oId "CUFF.17503.3"; tss_id "TSS11429";  |   |   |   |                                                                    |  |
| chr11 Cufflinks exon112391222 112391292      | . | + | . | gene_id "XLOC_009000"; transcript_id "TCONS_00015331"; exon_number |  |
| "1"; oId "CUFF.17503.4"; tss_id "TSS11429";  |   |   |   |                                                                    |  |
| chr11 Cufflinks exon112412016 112412157      | . | + | . | gene_id "XLOC_009000"; transcript_id "TCONS_00015331"; exon_number |  |
| "2"; oId "CUFF.17503.4"; tss_id "TSS11429";  |   |   |   |                                                                    |  |
| chr11 Cufflinks exon112492410 112492488      | . | + | . | gene_id "XLOC_009000"; transcript_id "TCONS_00015331"; exon_number |  |
| "3"; oId "CUFF.17503.4"; tss_id "TSS11429";  |   |   |   |                                                                    |  |
| chr11 Cufflinks exon112494537 112495035      | . | + | . | gene_id "XLOC_009000"; transcript_id "TCONS_00015331"; exon_number |  |
| "4"; oId "CUFF.17503.4"; tss_id "TSS11429";  |   |   |   |                                                                    |  |
| chr11 Cufflinks exon112498554 112498748      | . | + | . | gene_id "XLOC_009000"; transcript_id "TCONS_00015331"; exon_number |  |
| "5"; oId "CUFF.17503.4"; tss_id "TSS11429";  |   |   |   |                                                                    |  |
| chr11 Cufflinks exon112391222 112391292      | . | + | . | gene_id "XLOC_009000"; transcript_id "TCONS_00015332"; exon_number |  |
| "1"; oId "CUFF.17503.5"; tss_id "TSS11429";  |   |   |   |                                                                    |  |
| chr11 Cufflinks exon112412016 112412157      | . | + | . | gene_id "XLOC_009000"; transcript_id "TCONS_00015332"; exon_number |  |
| "2"; oId "CUFF.17503.5"; tss_id "TSS11429";  |   |   |   |                                                                    |  |

|       |                |           |           |   |   |   |                                                                                                                |
|-------|----------------|-----------|-----------|---|---|---|----------------------------------------------------------------------------------------------------------------|
| chr11 | Cufflinks exon | 112531986 | 112532369 | . | + | . | gene_id "XLOC_009000"; transcript_id "TCONS_00015332"; exon_number "3"; oId "CUFF.17503.5"; tss_id "TSS11429"; |
| chr11 | Cufflinks exon | 112565636 | 112565679 | . | + | . | gene_id "XLOC_009000"; transcript_id "TCONS_00015332"; exon_number "4"; oId "CUFF.17503.5"; tss_id "TSS11429"; |
| chr11 | Cufflinks exon | 112411309 | 112411359 | . | + | . | gene_id "XLOC_009000"; transcript_id "TCONS_00015333"; exon_number "1"; oId "CUFF.17503.6"; tss_id "TSS11430"; |
| chr11 | Cufflinks exon | 112412016 | 112412157 | . | + | . | gene_id "XLOC_009000"; transcript_id "TCONS_00015333"; exon_number "2"; oId "CUFF.17503.6"; tss_id "TSS11430"; |
| chr11 | Cufflinks exon | 112492410 | 112492488 | . | + | . | gene_id "XLOC_009000"; transcript_id "TCONS_00015333"; exon_number "3"; oId "CUFF.17503.6"; tss_id "TSS11430"; |
| chr11 | Cufflinks exon | 112494537 | 112495035 | . | + | . | gene_id "XLOC_009000"; transcript_id "TCONS_00015333"; exon_number "4"; oId "CUFF.17503.6"; tss_id "TSS11430"; |
| chr11 | Cufflinks exon | 112507974 | 112508336 | . | + | . | gene_id "XLOC_009000"; transcript_id "TCONS_00015333"; exon_number "5"; oId "CUFF.17503.6"; tss_id "TSS11430"; |
| chr11 | Cufflinks exon | 122933347 | 122933405 | . | + | . | gene_id "XLOC_009124"; transcript_id "TCONS_00015544"; exon_number "1"; oId "CUFF.17867.2"; tss_id "TSS11584"; |
| chr11 | Cufflinks exon | 122933747 | 122936832 | . | + | . | gene_id "XLOC_009124"; transcript_id "TCONS_00015544"; exon_number "2"; oId "CUFF.17867.2"; tss_id "TSS11584"; |
| chr11 | Cufflinks exon | 134431766 | 134431949 | . | + | . | gene_id "XLOC_009225"; transcript_id "TCONS_00015729"; exon_number "1"; oId "CUFF.18229.1"; tss_id "TSS11718"; |
| chr11 | Cufflinks exon | 134436113 | 134436690 | . | + | . | gene_id "XLOC_009225"; transcript_id "TCONS_00015729"; exon_number "2"; oId "CUFF.18229.1"; tss_id "TSS11718"; |
| chr11 | Cufflinks exon | 134435038 | 134435111 | . | + | . | gene_id "XLOC_009225"; transcript_id "TCONS_00015730"; exon_number "1"; oId "CUFF.18229.2"; tss_id "TSS11719"; |
| chr11 | Cufflinks exon | 134436113 | 134436209 | . | + | . | gene_id "XLOC_009225"; transcript_id "TCONS_00015730"; exon_number "2"; oId "CUFF.18229.2"; tss_id "TSS11719"; |
| chr11 | Cufflinks exon | 134442528 | 134442900 | . | + | . | gene_id "XLOC_009225"; transcript_id "TCONS_00015730"; exon_number "3"; oId "CUFF.18229.2"; tss_id "TSS11719"; |
| chr11 | Cufflinks exon | 134510184 | 134510202 | . | + | . | gene_id "XLOC_009235"; transcript_id "TCONS_00015740"; exon_number "1"; oId "CUFF.18249.1"; tss_id "TSS11729"; |
| chr11 | Cufflinks exon | 134510967 | 134512716 | . | + | . | gene_id "XLOC_009235"; transcript_id "TCONS_00015740"; exon_number "2"; oId "CUFF.18249.1"; tss_id "TSS11729"; |
| chr11 | Cufflinks exon | 134513444 | 134513861 | . | + | . | gene_id "XLOC_009235"; transcript_id "TCONS_00015740"; exon_number "3"; oId "CUFF.18249.1"; tss_id "TSS11729"; |
| chr11 | Cufflinks exon | 134524670 | 134525840 | . | + | . | gene_id "XLOC_009237"; transcript_id "TCONS_00015743"; exon_number "1"; oId "CUFF.18252.2"; tss_id "TSS11731"; |
| chr11 | Cufflinks exon | 134530106 | 134532107 | . | + | . | gene_id "XLOC_009237"; transcript_id "TCONS_00015743"; exon_number "2"; oId "CUFF.18252.2"; tss_id "TSS11731"; |
| chr11 | Cufflinks exon | 134524670 | 134525840 | . | + | . | gene_id "XLOC_009237"; transcript_id "TCONS_00015742"; exon_number "1"; oId "CUFF.18252.1"; tss_id "TSS11731"; |
| chr11 | Cufflinks exon | 134526319 | 134526401 | . | + | . | gene_id "XLOC_009237"; transcript_id "TCONS_00015742"; exon_number "2"; oId "CUFF.18252.1"; tss_id "TSS11731"; |
| chr11 | Cufflinks exon | 134530106 | 134532107 | . | + | . | gene_id "XLOC_009237"; transcript_id "TCONS_00015742"; exon_number "1"; oId "CUFF.18252.1"; tss_id "TSS11731"; |

"3"; oId "CUFF.18252.1"; tss\_id "TSS11731";  
chr11 Cufflinks exon134626584 134630525 . + . gene\_id "XLOC\_009247"; transcript\_id "TCONS\_00015757"; exon\_number  
"1"; oId "CUFF.18282.1"; tss\_id "TSS11743";  
chr11 Cufflinks exon134630963 134639452 . + . gene\_id "XLOC\_009247"; transcript\_id "TCONS\_00015757"; exon\_number  
"2"; oId "CUFF.18282.1"; tss\_id "TSS11743";  
chr11 Cufflinks exon134760387 134762887 . + . gene\_id "XLOC\_009258"; transcript\_id "TCONS\_00015768"; exon\_number  
"1"; oId "CUFF.18303.2"; tss\_id "TSS11754";  
chr11 Cufflinks exon134781416 134784294 . + . gene\_id "XLOC\_009258"; transcript\_id "TCONS\_00015768"; exon\_number  
"2"; oId "CUFF.18303.2"; tss\_id "TSS11754";  
chr11 Cufflinks exon134785091 134787927 . + . gene\_id "XLOC\_009258"; transcript\_id "TCONS\_00015768"; exon\_number  
"3"; oId "CUFF.18303.2"; tss\_id "TSS11754";  
chr11 Cufflinks exon134776833 134776961 . + . gene\_id "XLOC\_009258"; transcript\_id "TCONS\_00015769"; exon\_number  
"1"; oId "CUFF.18303.4"; tss\_id "TSS11755";  
chr11 Cufflinks exon134781416 134785332 . + . gene\_id "XLOC\_009258"; transcript\_id "TCONS\_00015769"; exon\_number  
"2"; oId "CUFF.18303.4"; tss\_id "TSS11755";  
chr11 Cufflinks exon134786751 134787927 . + . gene\_id "XLOC\_009258"; transcript\_id "TCONS\_00015769"; exon\_number  
"3"; oId "CUFF.18303.4"; tss\_id "TSS11755";  
chr11 Cufflinks exon134782095 134783494 . + . gene\_id "XLOC\_009258"; transcript\_id "TCONS\_00015771"; exon\_number  
"1"; oId "CUFF.18303.6"; tss\_id "TSS11757";  
chr11 Cufflinks exon134786757 134787927 . + . gene\_id "XLOC\_009258"; transcript\_id "TCONS\_00015771"; exon\_number  
"2"; oId "CUFF.18303.6"; tss\_id "TSS11757";  
chr11 Cufflinks exon324210 327224 . - . gene\_id "XLOC\_009270"; transcript\_id "TCONS\_00015788"; exon\_number "1"; oId  
"CUFF.13706.4"; tss\_id "TSS11773";  
chr11 Cufflinks exon327972 328549 . - . gene\_id "XLOC\_009270"; transcript\_id "TCONS\_00015788"; exon\_number "2"; oId  
"CUFF.13706.4"; tss\_id "TSS11773";  
chr11 Cufflinks exon565657 567853 . - . gene\_id "XLOC\_009280"; transcript\_id "TCONS\_00015810"; exon\_number "1"; oId  
"CUFF.13747.1"; tss\_id "TSS11786";  
chr11 Cufflinks exon568352 568457 . - . gene\_id "XLOC\_009280"; transcript\_id "TCONS\_00015810"; exon\_number "2"; oId  
"CUFF.13747.1"; tss\_id "TSS11786";  
chr11 Cufflinks exon2016406 2017018 . - . gene\_id "XLOC\_009325"; transcript\_id "TCONS\_00015871"; exon\_number "1"; oId  
"CUFF.13874.2"; tss\_id "TSS11835";  
chr11 Cufflinks exon2017106 2017228 . - . gene\_id "XLOC\_009325"; transcript\_id "TCONS\_00015871"; exon\_number "2"; oId  
"CUFF.13874.2"; tss\_id "TSS11835";  
chr11 Cufflinks exon2017309 2017421 . - . gene\_id "XLOC\_009325"; transcript\_id "TCONS\_00015871"; exon\_number "3"; oId  
"CUFF.13874.2"; tss\_id "TSS11835";  
chr11 Cufflinks exon2017517 2017651 . - . gene\_id "XLOC\_009325"; transcript\_id "TCONS\_00015871"; exon\_number "4"; oId  
"CUFF.13874.2"; tss\_id "TSS11835";  
chr11 Cufflinks exon2017748 2019105 . - . gene\_id "XLOC\_009325"; transcript\_id "TCONS\_00015871"; exon\_number "5"; oId  
"CUFF.13874.2"; tss\_id "TSS11835";  
chr11 Cufflinks exon2016406 2017024 . - . gene\_id "XLOC\_009325"; transcript\_id "TCONS\_00015870"; exon\_number "1"; oId  
"CUFF.13874.1"; tss\_id "TSS11835";  
chr11 Cufflinks exon2017106 2017228 . - . gene\_id "XLOC\_009325"; transcript\_id "TCONS\_00015870"; exon\_number "2"; oId  
"CUFF.13874.1"; tss\_id "TSS11835";

|       |                |         |         |   |   |   |                                                                                                                |
|-------|----------------|---------|---------|---|---|---|----------------------------------------------------------------------------------------------------------------|
| chr11 | Cufflinks exon | 2017309 | 2017421 | . | - | . | gene_id "XLOC_009325"; transcript_id "TCONS_00015870"; exon_number "3"; oId "CUFF.13874.1"; tss_id "TSS11835"; |
| chr11 | Cufflinks exon | 2017517 | 2017651 | . | - | . | gene_id "XLOC_009325"; transcript_id "TCONS_00015870"; exon_number "4"; oId "CUFF.13874.1"; tss_id "TSS11835"; |
| chr11 | Cufflinks exon | 2017748 | 2019105 | . | - | . | gene_id "XLOC_009325"; transcript_id "TCONS_00015870"; exon_number "5"; oId "CUFF.13874.1"; tss_id "TSS11835"; |
| chr11 | Cufflinks exon | 2016406 | 2017024 | . | - | . | gene_id "XLOC_009325"; transcript_id "TCONS_00015872"; exon_number "1"; oId "CUFF.13874.3"; tss_id "TSS11836"; |
| chr11 | Cufflinks exon | 2017106 | 2017228 | . | - | . | gene_id "XLOC_009325"; transcript_id "TCONS_00015872"; exon_number "2"; oId "CUFF.13874.3"; tss_id "TSS11836"; |
| chr11 | Cufflinks exon | 2017309 | 2017421 | . | - | . | gene_id "XLOC_009325"; transcript_id "TCONS_00015872"; exon_number "3"; oId "CUFF.13874.3"; tss_id "TSS11836"; |
| chr11 | Cufflinks exon | 2017517 | 2017651 | . | - | . | gene_id "XLOC_009325"; transcript_id "TCONS_00015872"; exon_number "4"; oId "CUFF.13874.3"; tss_id "TSS11836"; |
| chr11 | Cufflinks exon | 2022448 | 2022696 | . | - | . | gene_id "XLOC_009325"; transcript_id "TCONS_00015872"; exon_number "5"; oId "CUFF.13874.3"; tss_id "TSS11836"; |
| chr11 | Cufflinks exon | 3431335 | 3431679 | . | - | . | gene_id "XLOC_009368"; transcript_id "TCONS_00015938"; exon_number "1"; oId "CUFF.13979.2"; tss_id "TSS11888"; |
| chr11 | Cufflinks exon | 3435085 | 3435118 | . | - | . | gene_id "XLOC_009368"; transcript_id "TCONS_00015938"; exon_number "2"; oId "CUFF.13979.2"; tss_id "TSS11888"; |
| chr11 | Cufflinks exon | 5554683 | 5554900 | . | - | . | gene_id "XLOC_009396"; transcript_id "TCONS_00015988"; exon_number "1"; oId "CUFF.14058.1"; tss_id "TSS11924"; |
| chr11 | Cufflinks exon | 5612187 | 5612253 | . | - | . | gene_id "XLOC_009396"; transcript_id "TCONS_00015988"; exon_number "2"; oId "CUFF.14058.1"; tss_id "TSS11924"; |
| chr11 | Cufflinks exon | 5616462 | 5616580 | . | - | . | gene_id "XLOC_009396"; transcript_id "TCONS_00015988"; exon_number "3"; oId "CUFF.14058.1"; tss_id "TSS11924"; |
| chr11 | Cufflinks exon | 5666915 | 5667081 | . | - | . | gene_id "XLOC_009396"; transcript_id "TCONS_00015988"; exon_number "4"; oId "CUFF.14058.1"; tss_id "TSS11924"; |
| chr11 | Cufflinks exon | 6406455 | 6406644 | . | - | . | gene_id "XLOC_009414"; transcript_id "TCONS_00016014"; exon_number "1"; oId "CUFF.14095.2"; tss_id "TSS11942"; |
| chr11 | Cufflinks exon | 6411337 | 6411515 | . | - | . | gene_id "XLOC_009414"; transcript_id "TCONS_00016014"; exon_number "2"; oId "CUFF.14095.2"; tss_id "TSS11942"; |
| chr11 | Cufflinks exon | 6945768 | 6945806 | . | - | . | gene_id "XLOC_009440"; transcript_id "TCONS_00016057"; exon_number "1"; oId "CUFF.14174.1"; tss_id "TSS11975"; |
| chr11 | Cufflinks exon | 6947583 | 6948148 | . | - | . | gene_id "XLOC_009440"; transcript_id "TCONS_00016057"; exon_number "2"; oId "CUFF.14174.1"; tss_id "TSS11975"; |
| chr11 | Cufflinks exon | 8242638 | 8242985 | . | - | . | gene_id "XLOC_009455"; transcript_id "TCONS_00016078"; exon_number "1"; oId "CUFF.14227.1"; tss_id "TSS11993"; |
| chr11 | Cufflinks exon | 8243557 | 8243610 | . | - | . | gene_id "XLOC_009455"; transcript_id "TCONS_00016078"; exon_number "2"; oId "CUFF.14227.1"; tss_id "TSS11993"; |
| chr11 | Cufflinks exon | 9776092 | 9778445 | . | - | . | gene_id "XLOC_009492"; transcript_id "TCONS_00016142"; exon_number "1"; oId "CUFF.14315.2"; tss_id "TSS12043"; |
| chr11 | Cufflinks exon | 9779314 | 9779390 | . | - | . | gene_id "XLOC_009492"; transcript_id "TCONS_00016142"; exon_number "2"; oId "CUFF.14315.2"; tss_id "TSS12043"; |

"CUFF.14315.2"; tss\_id "TSS12043";  
chr11 Cufflinks exon9779551 9779586 . - . gene\_id "XLOC\_009492"; transcript\_id "TCONS\_00016142"; exon\_number "3"; oId  
"CUFF.14315.2"; tss\_id "TSS12043";  
chr11 Cufflinks exon9776092 9778445 . - . gene\_id "XLOC\_009492"; transcript\_id "TCONS\_00016143"; exon\_number "1"; oId  
"CUFF.14315.4"; tss\_id "TSS12043";  
chr11 Cufflinks exon9779314 9779390 . - . gene\_id "XLOC\_009492"; transcript\_id "TCONS\_00016143"; exon\_number "2"; oId  
"CUFF.14315.4"; tss\_id "TSS12043";  
chr11 Cufflinks exon9779605 9779646 . - . gene\_id "XLOC\_009492"; transcript\_id "TCONS\_00016143"; exon\_number "3"; oId  
"CUFF.14315.4"; tss\_id "TSS12043";  
chr11 Cufflinks exon9776092 9778445 . - . gene\_id "XLOC\_009492"; transcript\_id "TCONS\_00016144"; exon\_number "1"; oId  
"CUFF.14315.3"; tss\_id "TSS12043";  
chr11 Cufflinks exon9779314 9779390 . - . gene\_id "XLOC\_009492"; transcript\_id "TCONS\_00016144"; exon\_number "2"; oId  
"CUFF.14315.3"; tss\_id "TSS12043";  
chr11 Cufflinks exon9779635 9779676 . - . gene\_id "XLOC\_009492"; transcript\_id "TCONS\_00016144"; exon\_number "3"; oId  
"CUFF.14315.3"; tss\_id "TSS12043";  
chr11 Cufflinks exon9776092 9778445 . - . gene\_id "XLOC\_009492"; transcript\_id "TCONS\_00016146"; exon\_number "1"; oId  
"CUFF.14315.5"; tss\_id "TSS12044";  
chr11 Cufflinks exon9779314 9779390 . - . gene\_id "XLOC\_009492"; transcript\_id "TCONS\_00016146"; exon\_number "2"; oId  
"CUFF.14315.5"; tss\_id "TSS12044";  
chr11 Cufflinks exon9780976 9781080 . - . gene\_id "XLOC\_009492"; transcript\_id "TCONS\_00016146"; exon\_number "3"; oId  
"CUFF.14315.5"; tss\_id "TSS12044";  
chr11 Cufflinks exon9776092 9778445 . - . gene\_id "XLOC\_009492"; transcript\_id "TCONS\_00016145"; exon\_number "1"; oId  
"CUFF.14315.1"; tss\_id "TSS12044";  
chr11 Cufflinks exon9779314 9779390 . - . gene\_id "XLOC\_009492"; transcript\_id "TCONS\_00016145"; exon\_number "2"; oId  
"CUFF.14315.1"; tss\_id "TSS12044";  
chr11 Cufflinks exon9781002 9781080 . - . gene\_id "XLOC\_009492"; transcript\_id "TCONS\_00016145"; exon\_number "3"; oId  
"CUFF.14315.1"; tss\_id "TSS12044";  
chr11 Cufflinks exon12999054 13002546 . - . gene\_id "XLOC\_009515"; transcript\_id "TCONS\_00016185"; exon\_number  
"1"; oId "CUFF.14385.3"; tss\_id "TSS12072";  
chr11 Cufflinks exon13011003 13011095 . - . gene\_id "XLOC\_009515"; transcript\_id "TCONS\_00016185"; exon\_number  
"2"; oId "CUFF.14385.3"; tss\_id "TSS12072";  
chr11 Cufflinks exon12999054 13002546 . - . gene\_id "XLOC\_009515"; transcript\_id "TCONS\_00016184"; exon\_number  
"1"; oId "CUFF.14385.2"; tss\_id "TSS12072";  
chr11 Cufflinks exon13007587 13007691 . - . gene\_id "XLOC\_009515"; transcript\_id "TCONS\_00016184"; exon\_number  
"2"; oId "CUFF.14385.2"; tss\_id "TSS12072";  
chr11 Cufflinks exon13009949 13010013 . - . gene\_id "XLOC\_009515"; transcript\_id "TCONS\_00016184"; exon\_number  
"3"; oId "CUFF.14385.2"; tss\_id "TSS12072";  
chr11 Cufflinks exon13011003 13011095 . - . gene\_id "XLOC\_009515"; transcript\_id "TCONS\_00016184"; exon\_number  
"4"; oId "CUFF.14385.2"; tss\_id "TSS12072";  
chr11 Cufflinks exon12999054 13002456 . - . gene\_id "XLOC\_009515"; transcript\_id "TCONS\_00016183"; exon\_number  
"1"; oId "CUFF.14385.1"; tss\_id "TSS12072";  
chr11 Cufflinks exon13011003 13011095 . - . gene\_id "XLOC\_009515"; transcript\_id "TCONS\_00016183"; exon\_number  
"2"; oId "CUFF.14385.1"; tss\_id "TSS12072";



|       |                        |          |   |   |   |                                                                                                                |
|-------|------------------------|----------|---|---|---|----------------------------------------------------------------------------------------------------------------|
| chr11 | Cufflinks exon12999054 | 13002456 | . | - | . | gene_id "XLOC_009515"; transcript_id "TCONS_00016186"; exon_number "1"; oId "CUFF.14385.4"; tss_id "TSS12072"; |
| chr11 | Cufflinks exon13007587 | 13007691 | . | - | . | gene_id "XLOC_009515"; transcript_id "TCONS_00016186"; exon_number "2"; oId "CUFF.14385.4"; tss_id "TSS12072"; |
| chr11 | Cufflinks exon13011003 | 13011111 | . | - | . | gene_id "XLOC_009515"; transcript_id "TCONS_00016186"; exon_number "3"; oId "CUFF.14385.4"; tss_id "TSS12072"; |
| chr11 | Cufflinks exon18082176 | 18087304 | . | - | . | gene_id "XLOC_009573"; transcript_id "TCONS_00016277"; exon_number "1"; oId "CUFF.14599.1"; tss_id "TSS12148"; |
| chr11 | Cufflinks exon18087912 | 18089152 | . | - | . | gene_id "XLOC_009573"; transcript_id "TCONS_00016277"; exon_number "2"; oId "CUFF.14599.1"; tss_id "TSS12148"; |
| chr11 | Cufflinks exon18082176 | 18087304 | . | - | . | gene_id "XLOC_009573"; transcript_id "TCONS_00016278"; exon_number "1"; oId "CUFF.14599.2"; tss_id "TSS12148"; |
| chr11 | Cufflinks exon18089157 | 18089181 | . | - | . | gene_id "XLOC_009573"; transcript_id "TCONS_00016278"; exon_number "2"; oId "CUFF.14599.2"; tss_id "TSS12148"; |
| chr11 | Cufflinks exon18082176 | 18087304 | . | - | . | gene_id "XLOC_009573"; transcript_id "TCONS_00016279"; exon_number "1"; oId "CUFF.14599.4"; tss_id "TSS12149"; |
| chr11 | Cufflinks exon18087912 | 18088034 | . | - | . | gene_id "XLOC_009573"; transcript_id "TCONS_00016279"; exon_number "2"; oId "CUFF.14599.4"; tss_id "TSS12149"; |
| chr11 | Cufflinks exon18089157 | 18092679 | . | - | . | gene_id "XLOC_009573"; transcript_id "TCONS_00016279"; exon_number "3"; oId "CUFF.14599.4"; tss_id "TSS12149"; |
| chr11 | Cufflinks exon18082176 | 18087305 | . | - | . | gene_id "XLOC_009573"; transcript_id "TCONS_00016281"; exon_number "1"; oId "CUFF.14599.3"; tss_id "TSS12151"; |
| chr11 | Cufflinks exon18089157 | 18089219 | . | - | . | gene_id "XLOC_009573"; transcript_id "TCONS_00016281"; exon_number "2"; oId "CUFF.14599.3"; tss_id "TSS12151"; |
| chr11 | Cufflinks exon18101172 | 18101777 | . | - | . | gene_id "XLOC_009573"; transcript_id "TCONS_00016281"; exon_number "3"; oId "CUFF.14599.3"; tss_id "TSS12151"; |
| chr11 | Cufflinks exon21674180 | 21674221 | . | - | . | gene_id "XLOC_009597"; transcript_id "TCONS_00016317"; exon_number "1"; oId "CUFF.14693.9"; tss_id "TSS12179"; |
| chr11 | Cufflinks exon21686204 | 21686319 | . | - | . | gene_id "XLOC_009597"; transcript_id "TCONS_00016317"; exon_number "2"; oId "CUFF.14693.9"; tss_id "TSS12179"; |
| chr11 | Cufflinks exon21756038 | 21756216 | . | - | . | gene_id "XLOC_009597"; transcript_id "TCONS_00016317"; exon_number "3"; oId "CUFF.14693.9"; tss_id "TSS12179"; |
| chr11 | Cufflinks exon21768061 | 21768187 | . | - | . | gene_id "XLOC_009597"; transcript_id "TCONS_00016317"; exon_number "4"; oId "CUFF.14693.9"; tss_id "TSS12179"; |
| chr11 | Cufflinks exon21774061 | 21774410 | . | - | . | gene_id "XLOC_009597"; transcript_id "TCONS_00016317"; exon_number "5"; oId "CUFF.14693.9"; tss_id "TSS12179"; |
| chr11 | Cufflinks exon34070217 | 34072580 | . | - | . | gene_id "XLOC_009668"; transcript_id "TCONS_00016441"; exon_number "1"; oId "CUFF.15088.1"; tss_id "TSS12276"; |
| chr11 | Cufflinks exon34073580 | 34073744 | . | - | . | gene_id "XLOC_009668"; transcript_id "TCONS_00016441"; exon_number "2"; oId "CUFF.15088.1"; tss_id "TSS12276"; |
| chr11 | Cufflinks exon35072311 | 35073259 | . | - | . | gene_id "XLOC_009680"; transcript_id "TCONS_00016456"; exon_number "1"; oId "CUFF.15126.1"; tss_id "TSS12289"; |
| chr11 | Cufflinks exon35073722 | 35073966 | . | - | . | gene_id "XLOC_009680"; transcript_id "TCONS_00016456"; exon_number "2"; oId "CUFF.15126.1"; tss_id "TSS12289"; |

"2"; oId "CUFF.15126.1"; tss\_id "TSS12289";  
chr11 Cufflinks exon35077825 35077910 . - . gene\_id "XLOC\_009680"; transcript\_id "TCONS\_00016456"; exon\_number  
"3"; oId "CUFF.15126.1"; tss\_id "TSS12289";  
chr11 Cufflinks exon35086667 35086860 . - . gene\_id "XLOC\_009680"; transcript\_id "TCONS\_00016456"; exon\_number  
"4"; oId "CUFF.15126.1"; tss\_id "TSS12289";  
chr11 Cufflinks exon35088228 35088718 . - . gene\_id "XLOC\_009680"; transcript\_id "TCONS\_00016456"; exon\_number  
"5"; oId "CUFF.15126.1"; tss\_id "TSS12289";  
chr11 Cufflinks exon57298795 57299056 . - . gene\_id "XLOC\_009796"; transcript\_id "TCONS\_00016672"; exon\_number  
"1"; oId "CUFF.15479.1"; tss\_id "TSS12447";  
chr11 Cufflinks exon57309889 57312939 . - . gene\_id "XLOC\_009796"; transcript\_id "TCONS\_00016672"; exon\_number  
"2"; oId "CUFF.15479.1"; tss\_id "TSS12447";  
chr11 Cufflinks exon57343613 57344555 . - . gene\_id "XLOC\_009802"; transcript\_id "TCONS\_00016679"; exon\_number  
"1"; oId "CUFF.15492.1"; tss\_id "TSS12454";  
chr11 Cufflinks exon57369569 57369711 . - . gene\_id "XLOC\_009802"; transcript\_id "TCONS\_00016679"; exon\_number  
"2"; oId "CUFF.15492.1"; tss\_id "TSS12454";  
chr11 Cufflinks exon57371834 57371933 . - . gene\_id "XLOC\_009802"; transcript\_id "TCONS\_00016679"; exon\_number  
"3"; oId "CUFF.15492.1"; tss\_id "TSS12454";  
chr11 Cufflinks exon57363161 57363654 . - . gene\_id "XLOC\_009802"; transcript\_id "TCONS\_00016681"; exon\_number  
"1"; oId "CUFF.15492.2"; tss\_id "TSS12454";  
chr11 Cufflinks exon57369534 57369711 . - . gene\_id "XLOC\_009802"; transcript\_id "TCONS\_00016681"; exon\_number  
"2"; oId "CUFF.15492.2"; tss\_id "TSS12454";  
chr11 Cufflinks exon57371834 57371933 . - . gene\_id "XLOC\_009802"; transcript\_id "TCONS\_00016681"; exon\_number  
"3"; oId "CUFF.15492.2"; tss\_id "TSS12454";  
chr11 Cufflinks exon62161200 62162426 . - . gene\_id "XLOC\_009865"; transcript\_id "TCONS\_00016789"; exon\_number  
"1"; oId "CUFF.15766.1"; tss\_id "TSS12535";  
chr11 Cufflinks exon62166824 62168883 . - . gene\_id "XLOC\_009865"; transcript\_id "TCONS\_00016789"; exon\_number  
"2"; oId "CUFF.15766.1"; tss\_id "TSS12535";  
chr11 Cufflinks exon62169825 62169896 . - . gene\_id "XLOC\_009865"; transcript\_id "TCONS\_00016789"; exon\_number  
"3"; oId "CUFF.15766.1"; tss\_id "TSS12535";  
chr11 Cufflinks exon62163321 62166660 . - . gene\_id "XLOC\_009865"; transcript\_id "TCONS\_00016790"; exon\_number  
"1"; oId "CUFF.15766.4"; tss\_id "TSS12535";  
chr11 Cufflinks exon62166824 62166964 . - . gene\_id "XLOC\_009865"; transcript\_id "TCONS\_00016790"; exon\_number  
"2"; oId "CUFF.15766.4"; tss\_id "TSS12535";  
chr11 Cufflinks exon62168192 62168315 . - . gene\_id "XLOC\_009865"; transcript\_id "TCONS\_00016790"; exon\_number  
"3"; oId "CUFF.15766.4"; tss\_id "TSS12535";  
chr11 Cufflinks exon62169825 62169872 . - . gene\_id "XLOC\_009865"; transcript\_id "TCONS\_00016790"; exon\_number  
"4"; oId "CUFF.15766.4"; tss\_id "TSS12535";  
chr11 Cufflinks exon62163321 62168883 . - . gene\_id "XLOC\_009865"; transcript\_id "TCONS\_00016791"; exon\_number  
"1"; oId "CUFF.15766.5"; tss\_id "TSS12535";  
chr11 Cufflinks exon62169825 62169896 . - . gene\_id "XLOC\_009865"; transcript\_id "TCONS\_00016791"; exon\_number  
"2"; oId "CUFF.15766.5"; tss\_id "TSS12535";  
chr11 Cufflinks exon62619460 62619908 . - . gene\_id "XLOC\_009892"; transcript\_id "TCONS\_00016835"; exon\_number  
"1"; oId "CUFF.15824.3"; tss\_id "TSS12572";

|       |                        |          |   |   |   |                                                                                                                |
|-------|------------------------|----------|---|---|---|----------------------------------------------------------------------------------------------------------------|
| chr11 | Cufflinks exon62620128 | 62620153 | . | - | . | gene_id "XLOC_009892"; transcript_id "TCONS_00016835"; exon_number "2"; oId "CUFF.15824.3"; tss_id "TSS12572"; |
| chr11 | Cufflinks exon62620283 | 62621062 | . | - | . | gene_id "XLOC_009892"; transcript_id "TCONS_00016835"; exon_number "3"; oId "CUFF.15824.3"; tss_id "TSS12572"; |
| chr11 | Cufflinks exon62621273 | 62621551 | . | - | . | gene_id "XLOC_009892"; transcript_id "TCONS_00016835"; exon_number "4"; oId "CUFF.15824.3"; tss_id "TSS12572"; |
| chr11 | Cufflinks exon62619460 | 62620153 | . | - | . | gene_id "XLOC_009892"; transcript_id "TCONS_00016839"; exon_number "1"; oId "CUFF.15824.5"; tss_id "TSS12573"; |
| chr11 | Cufflinks exon62620283 | 62621062 | . | - | . | gene_id "XLOC_009892"; transcript_id "TCONS_00016839"; exon_number "2"; oId "CUFF.15824.5"; tss_id "TSS12573"; |
| chr11 | Cufflinks exon62621273 | 62622023 | . | - | . | gene_id "XLOC_009892"; transcript_id "TCONS_00016839"; exon_number "3"; oId "CUFF.15824.5"; tss_id "TSS12573"; |
| chr11 | Cufflinks exon62622360 | 62622688 | . | - | . | gene_id "XLOC_009892"; transcript_id "TCONS_00016839"; exon_number "4"; oId "CUFF.15824.5"; tss_id "TSS12573"; |
| chr11 | Cufflinks exon62622896 | 62622938 | . | - | . | gene_id "XLOC_009892"; transcript_id "TCONS_00016839"; exon_number "5"; oId "CUFF.15824.5"; tss_id "TSS12573"; |
| chr11 | Cufflinks exon62623337 | 62623360 | . | - | . | gene_id "XLOC_009892"; transcript_id "TCONS_00016839"; exon_number "6"; oId "CUFF.15824.5"; tss_id "TSS12573"; |
| chr11 | Cufflinks exon62619460 | 62620153 | . | - | . | gene_id "XLOC_009892"; transcript_id "TCONS_00016838"; exon_number "1"; oId "CUFF.15824.4"; tss_id "TSS12573"; |
| chr11 | Cufflinks exon62620283 | 62620587 | . | - | . | gene_id "XLOC_009892"; transcript_id "TCONS_00016838"; exon_number "2"; oId "CUFF.15824.4"; tss_id "TSS12573"; |
| chr11 | Cufflinks exon62621024 | 62621062 | . | - | . | gene_id "XLOC_009892"; transcript_id "TCONS_00016838"; exon_number "3"; oId "CUFF.15824.4"; tss_id "TSS12573"; |
| chr11 | Cufflinks exon62621273 | 62621305 | . | - | . | gene_id "XLOC_009892"; transcript_id "TCONS_00016838"; exon_number "4"; oId "CUFF.15824.4"; tss_id "TSS12573"; |
| chr11 | Cufflinks exon62621490 | 62622023 | . | - | . | gene_id "XLOC_009892"; transcript_id "TCONS_00016838"; exon_number "5"; oId "CUFF.15824.4"; tss_id "TSS12573"; |
| chr11 | Cufflinks exon62622360 | 62622410 | . | - | . | gene_id "XLOC_009892"; transcript_id "TCONS_00016838"; exon_number "6"; oId "CUFF.15824.4"; tss_id "TSS12573"; |
| chr11 | Cufflinks exon62622605 | 62622680 | . | - | . | gene_id "XLOC_009892"; transcript_id "TCONS_00016838"; exon_number "7"; oId "CUFF.15824.4"; tss_id "TSS12573"; |
| chr11 | Cufflinks exon62622896 | 62622938 | . | - | . | gene_id "XLOC_009892"; transcript_id "TCONS_00016838"; exon_number "8"; oId "CUFF.15824.4"; tss_id "TSS12573"; |
| chr11 | Cufflinks exon62623337 | 62623360 | . | - | . | gene_id "XLOC_009892"; transcript_id "TCONS_00016838"; exon_number "9"; oId "CUFF.15824.4"; tss_id "TSS12573"; |
| chr11 | Cufflinks exon62619460 | 62620153 | . | - | . | gene_id "XLOC_009892"; transcript_id "TCONS_00016837"; exon_number "1"; oId "CUFF.15824.2"; tss_id "TSS12573"; |
| chr11 | Cufflinks exon62620283 | 62621062 | . | - | . | gene_id "XLOC_009892"; transcript_id "TCONS_00016837"; exon_number "2"; oId "CUFF.15824.2"; tss_id "TSS12573"; |
| chr11 | Cufflinks exon62621273 | 62621538 | . | - | . | gene_id "XLOC_009892"; transcript_id "TCONS_00016837"; exon_number "3"; oId "CUFF.15824.2"; tss_id "TSS12573"; |
| chr11 | Cufflinks exon62621993 | 62622023 | . | - | . | gene_id "XLOC_009892"; transcript_id "TCONS_00016837"; exon_number                                             |

"4"; oId "CUFF.15824.2"; tss\_id "TSS12573";  
chr11 Cufflinks exon62622360 62622410 . - . gene\_id "XLOC\_009892"; transcript\_id "TCONS\_00016837"; exon\_number  
"5"; oId "CUFF.15824.2"; tss\_id "TSS12573";  
chr11 Cufflinks exon62622605 62622688 . - . gene\_id "XLOC\_009892"; transcript\_id "TCONS\_00016837"; exon\_number  
"6"; oId "CUFF.15824.2"; tss\_id "TSS12573";  
chr11 Cufflinks exon62622896 62622938 . - . gene\_id "XLOC\_009892"; transcript\_id "TCONS\_00016837"; exon\_number  
"7"; oId "CUFF.15824.2"; tss\_id "TSS12573";  
chr11 Cufflinks exon62623337 62623360 . - . gene\_id "XLOC\_009892"; transcript\_id "TCONS\_00016837"; exon\_number  
"8"; oId "CUFF.15824.2"; tss\_id "TSS12573";  
chr11 Cufflinks exon 62619460 62620153 . - . gene\_id "XLOC\_009892"; transcript\_id "TCONS\_00016836";  
exon\_number "1"; oId "CUFF.15824.1"; tss\_id "TSS12573";  
chr11 Cufflinks exon 62620283 62620311 . - . gene\_id "XLOC\_009892"; transcript\_id "TCONS\_00016836";  
exon\_number "2"; oId "CUFF.15824.1"; tss\_id "TSS12573";  
chr11 Cufflinks exon 62620547 62620587 . - . gene\_id "XLOC\_009892"; transcript\_id "TCONS\_00016836";  
exon\_number "3"; oId "CUFF.15824.1"; tss\_id "TSS12573";  
chr11 Cufflinks exon 62621024 62621062 . - . gene\_id "XLOC\_009892"; transcript\_id "TCONS\_00016836";  
exon\_number "4"; oId "CUFF.15824.1"; tss\_id "TSS12573";  
chr11 Cufflinks exon 62621273 62621305 . - . gene\_id "XLOC\_009892"; transcript\_id "TCONS\_00016836";  
exon\_number "5"; oId "CUFF.15824.1"; tss\_id "TSS12573";  
chr11 Cufflinks exon 62621490 62621536 . - . gene\_id "XLOC\_009892"; transcript\_id "TCONS\_00016836";  
exon\_number "6"; oId "CUFF.15824.1"; tss\_id "TSS12573";  
chr11 Cufflinks exon 62621991 62622023 . - . gene\_id "XLOC\_009892"; transcript\_id "TCONS\_00016836";  
exon\_number "7"; oId "CUFF.15824.1"; tss\_id "TSS12573";  
chr11 Cufflinks exon 62622360 62622410 . - . gene\_id "XLOC\_009892"; transcript\_id "TCONS\_00016836";  
exon\_number "8"; oId "CUFF.15824.1"; tss\_id "TSS12573";  
chr11 Cufflinks exon 62622605 62622688 . - . gene\_id "XLOC\_009892"; transcript\_id "TCONS\_00016836";  
exon\_number "9"; oId "CUFF.15824.1"; tss\_id "TSS12573";  
chr11 Cufflinks exon 62622896 62622938 . - . gene\_id "XLOC\_009892"; transcript\_id "TCONS\_00016836";  
exon\_number "10"; oId "CUFF.15824.1"; tss\_id "TSS12573";  
chr11 Cufflinks exon 62623337 62623360 . - . gene\_id "XLOC\_009892"; transcript\_id "TCONS\_00016836";  
exon\_number "11"; oId "CUFF.15824.1"; tss\_id "TSS12573";  
chr11 Cufflinks exon 62699847 62703958 . - . gene\_id "XLOC\_009895"; transcript\_id "TCONS\_00016842";  
exon\_number "1"; oId "CUFF.15831.1"; tss\_id "TSS12576";  
chr11 Cufflinks exon 62704246 62704347 . - . gene\_id "XLOC\_009895"; transcript\_id "TCONS\_00016842";  
exon\_number "2"; oId "CUFF.15831.1"; tss\_id "TSS12576";  
chr11 Cufflinks exon 62829538 62829549 . - . gene\_id "XLOC\_009895"; transcript\_id "TCONS\_00016842";  
exon\_number "3"; oId "CUFF.15831.1"; tss\_id "TSS12576";  
chr11 Cufflinks exon 63538430 63538655 . - . gene\_id "XLOC\_009901"; transcript\_id "TCONS\_00016852";  
exon\_number "1"; oId "CUFF.15849.1"; tss\_id "TSS12583";  
chr11 Cufflinks exon 63580192 63580777 . - . gene\_id "XLOC\_009901"; transcript\_id "TCONS\_00016852";  
exon\_number "2"; oId "CUFF.15849.1"; tss\_id "TSS12583";  
chr11 Cufflinks exon 63538430 63538655 . - . gene\_id "XLOC\_009901"; transcript\_id "TCONS\_00016853";  
exon\_number "1"; oId "CUFF.15849.2"; tss\_id "TSS12583";

|                  |      |                 |          |             |   |   |                                                        |
|------------------|------|-----------------|----------|-------------|---|---|--------------------------------------------------------|
| chr11 Cufflinks  | exon | 63580324        | 63580792 | .           | - | . | gene_id "XLOC_009901"; transcript_id "TCONS_00016853"; |
| exon_number "2"; | oId  | "CUFF.15849.2"; | tss_id   | "TSS12583"; |   |   |                                                        |
| chr11 Cufflinks  | exon | 63539877        | 63539925 | .           | - | . | gene_id "XLOC_009901"; transcript_id "TCONS_00016854"; |
| exon_number "1"; | oId  | "CUFF.15849.3"; | tss_id   | "TSS12583"; |   |   |                                                        |
| chr11 Cufflinks  | exon | 63580192        | 63580761 | .           | - | . | gene_id "XLOC_009901"; transcript_id "TCONS_00016854"; |
| exon_number "2"; | oId  | "CUFF.15849.3"; | tss_id   | "TSS12583"; |   |   |                                                        |
| chr11 Cufflinks  | exon | 63550415        | 63550451 | .           | - | . | gene_id "XLOC_009901"; transcript_id "TCONS_00016855"; |
| exon_number "1"; | oId  | "CUFF.15849.4"; | tss_id   | "TSS12583"; |   |   |                                                        |
| chr11 Cufflinks  | exon | 63580192        | 63580779 | .           | - | . | gene_id "XLOC_009901"; transcript_id "TCONS_00016855"; |
| exon_number "2"; | oId  | "CUFF.15849.4"; | tss_id   | "TSS12583"; |   |   |                                                        |
| chr11 Cufflinks  | exon | 64015920        | 64016070 | .           | - | . | gene_id "XLOC_009907"; transcript_id "TCONS_00016864"; |
| exon_number "1"; | oId  | "CUFF.15908.1"; | tss_id   | "TSS12591"; |   |   |                                                        |
| chr11 Cufflinks  | exon | 64016856        | 64018791 | .           | - | . | gene_id "XLOC_009907"; transcript_id "TCONS_00016864"; |
| exon_number "2"; | oId  | "CUFF.15908.1"; | tss_id   | "TSS12591"; |   |   |                                                        |
| chr11 Cufflinks  | exon | 65574324        | 65574984 | .           | - | . | gene_id "XLOC_009954"; transcript_id "TCONS_00016971"; |
| exon_number "1"; | oId  | "CUFF.16079.1"; | tss_id   | "TSS12665"; |   |   |                                                        |
| chr11 Cufflinks  | exon | 65585461        | 65585719 | .           | - | . | gene_id "XLOC_009954"; transcript_id "TCONS_00016971"; |
| exon_number "2"; | oId  | "CUFF.16079.1"; | tss_id   | "TSS12665"; |   |   |                                                        |
| chr11 Cufflinks  | exon | 65575512        | 65584626 | .           | - | . | gene_id "XLOC_009954"; transcript_id "TCONS_00016973"; |
| exon_number "1"; | oId  | "CUFF.16079.5"; | tss_id   | "TSS12665"; |   |   |                                                        |
| chr11 Cufflinks  | exon | 65585461        | 65585717 | .           | - | . | gene_id "XLOC_009954"; transcript_id "TCONS_00016973"; |
| exon_number "2"; | oId  | "CUFF.16079.5"; | tss_id   | "TSS12665"; |   |   |                                                        |
| chr11 Cufflinks  | exon | 65575512        | 65583149 | .           | - | . | gene_id "XLOC_009954"; transcript_id "TCONS_00016974"; |
| exon_number "1"; | oId  | "CUFF.16079.4"; | tss_id   | "TSS12665"; |   |   |                                                        |
| chr11 Cufflinks  | exon | 65585461        | 65585719 | .           | - | . | gene_id "XLOC_009954"; transcript_id "TCONS_00016974"; |
| exon_number "2"; | oId  | "CUFF.16079.4"; | tss_id   | "TSS12665"; |   |   |                                                        |
| chr11 Cufflinks  | exon | 65575512        | 65583147 | .           | - | . | gene_id "XLOC_009954"; transcript_id "TCONS_00016975"; |
| exon_number "1"; | oId  | "CUFF.16079.3"; | tss_id   | "TSS12665"; |   |   |                                                        |
| chr11 Cufflinks  | exon | 65585461        | 65585722 | .           | - | . | gene_id "XLOC_009954"; transcript_id "TCONS_00016975"; |
| exon_number "2"; | oId  | "CUFF.16079.3"; | tss_id   | "TSS12665"; |   |   |                                                        |
| chr11 Cufflinks  | exon | 65590232        | 65592119 | .           | - | . | gene_id "XLOC_009955"; transcript_id "TCONS_00016977"; |
| exon_number "1"; | oId  | "CUFF.16080.4"; | tss_id   | "TSS12666"; |   |   |                                                        |
| chr11 Cufflinks  | exon | 65593747        | 65594080 | .           | - | . | gene_id "XLOC_009955"; transcript_id "TCONS_00016977"; |
| exon_number "2"; | oId  | "CUFF.16080.4"; | tss_id   | "TSS12666"; |   |   |                                                        |
| chr11 Cufflinks  | exon | 65598769        | 65600020 | .           | - | . | gene_id "XLOC_009955"; transcript_id "TCONS_00016977"; |
| exon_number "3"; | oId  | "CUFF.16080.4"; | tss_id   | "TSS12666"; |   |   |                                                        |
| chr11 Cufflinks  | exon | 65600105        | 65600937 | .           | - | . | gene_id "XLOC_009955"; transcript_id "TCONS_00016977"; |
| exon_number "4"; | oId  | "CUFF.16080.4"; | tss_id   | "TSS12666"; |   |   |                                                        |
| chr11 Cufflinks  | exon | 65590232        | 65592119 | .           | - | . | gene_id "XLOC_009955"; transcript_id "TCONS_00016976"; |
| exon_number "1"; | oId  | "CUFF.16080.2"; | tss_id   | "TSS12666"; |   |   |                                                        |
| chr11 Cufflinks  | exon | 65593767        | 65594080 | .           | - | . | gene_id "XLOC_009955"; transcript_id "TCONS_00016976"; |
| exon_number "2"; | oId  | "CUFF.16080.2"; | tss_id   | "TSS12666"; |   |   |                                                        |
| chr11 Cufflinks  | exon | 65598769        | 65600020 | .           | - | . | gene_id "XLOC_009955"; transcript_id "TCONS_00016976"; |

|                                                         |                                                            |
|---------------------------------------------------------|------------------------------------------------------------|
| exon_number "3"; oId "CUFF.16080.2"; tss_id "TSS12666"; |                                                            |
| chr11 Cufflinks exon 65600105 65600937 .                | - . gene_id "XLOC_009955"; transcript_id "TCONS_00016976"; |
| exon_number "4"; oId "CUFF.16080.2"; tss_id "TSS12666"; |                                                            |
| chr11 Cufflinks exon 65590232 65590738 .                | - . gene_id "XLOC_009955"; transcript_id "TCONS_00016978"; |
| exon_number "1"; oId "CUFF.16080.3"; tss_id "TSS12666"; |                                                            |
| chr11 Cufflinks exon 65591992 65592119 .                | - . gene_id "XLOC_009955"; transcript_id "TCONS_00016978"; |
| exon_number "2"; oId "CUFF.16080.3"; tss_id "TSS12666"; |                                                            |
| chr11 Cufflinks exon 65593747 65594080 .                | - . gene_id "XLOC_009955"; transcript_id "TCONS_00016978"; |
| exon_number "3"; oId "CUFF.16080.3"; tss_id "TSS12666"; |                                                            |
| chr11 Cufflinks exon 65598769 65599873 .                | - . gene_id "XLOC_009955"; transcript_id "TCONS_00016978"; |
| exon_number "4"; oId "CUFF.16080.3"; tss_id "TSS12666"; |                                                            |
| chr11 Cufflinks exon 65600105 65600951 .                | - . gene_id "XLOC_009955"; transcript_id "TCONS_00016978"; |
| exon_number "5"; oId "CUFF.16080.3"; tss_id "TSS12666"; |                                                            |
| chr11 Cufflinks exon 67778131 67782875 .                | - . gene_id "XLOC_010036"; transcript_id "TCONS_00017120"; |
| exon_number "1"; oId "CUFF.16362.1"; tss_id "TSS12773"; |                                                            |
| chr11 Cufflinks exon 67796751 67797852 .                | - . gene_id "XLOC_010036"; transcript_id "TCONS_00017120"; |
| exon_number "2"; oId "CUFF.16362.1"; tss_id "TSS12773"; |                                                            |
| chr11 Cufflinks exon 67778131 67782875 .                | - . gene_id "XLOC_010036"; transcript_id "TCONS_00017121"; |
| exon_number "1"; oId "CUFF.16362.2"; tss_id "TSS12773"; |                                                            |
| chr11 Cufflinks exon 67796751 67796887 .                | - . gene_id "XLOC_010036"; transcript_id "TCONS_00017121"; |
| exon_number "2"; oId "CUFF.16362.2"; tss_id "TSS12773"; |                                                            |
| chr11 Cufflinks exon 67797212 67797875 .                | - . gene_id "XLOC_010036"; transcript_id "TCONS_00017121"; |
| exon_number "3"; oId "CUFF.16362.2"; tss_id "TSS12773"; |                                                            |
| chr11 Cufflinks exon 67791471 67796887 .                | - . gene_id "XLOC_010036"; transcript_id "TCONS_00017122"; |
| exon_number "1"; oId "CUFF.16362.3"; tss_id "TSS12773"; |                                                            |
| chr11 Cufflinks exon 67797212 67797852 .                | - . gene_id "XLOC_010036"; transcript_id "TCONS_00017122"; |
| exon_number "2"; oId "CUFF.16362.3"; tss_id "TSS12773"; |                                                            |
| chr11 Cufflinks exon 70221634 70221728 .                | - . gene_id "XLOC_010066"; transcript_id "TCONS_00017175"; |
| exon_number "1"; oId "CUFF.16473.1"; tss_id "TSS12812"; |                                                            |
| chr11 Cufflinks exon 70244204 70244581 .                | - . gene_id "XLOC_010066"; transcript_id "TCONS_00017175"; |
| exon_number "2"; oId "CUFF.16473.1"; tss_id "TSS12812"; |                                                            |
| chr11 Cufflinks exon 72392952 72393891 .                | - . gene_id "XLOC_010091"; transcript_id "TCONS_00017220"; |
| exon_number "1"; oId "CUFF.16554.1"; tss_id "TSS12849"; |                                                            |
| chr11 Cufflinks exon 72394151 72395025 .                | - . gene_id "XLOC_010091"; transcript_id "TCONS_00017220"; |
| exon_number "2"; oId "CUFF.16554.1"; tss_id "TSS12849"; |                                                            |
| chr11 Cufflinks exon 75921978 75922293 .                | - . gene_id "XLOC_010128"; transcript_id "TCONS_00017293"; |
| exon_number "1"; oId "CUFF.16728.2"; tss_id "TSS12909"; |                                                            |
| chr11 Cufflinks exon 75924100 75924258 .                | - . gene_id "XLOC_010128"; transcript_id "TCONS_00017293"; |
| exon_number "2"; oId "CUFF.16728.2"; tss_id "TSS12909"; |                                                            |
| chr11 Cufflinks exon 75921978 75922293 .                | - . gene_id "XLOC_010128"; transcript_id "TCONS_00017294"; |
| exon_number "1"; oId "CUFF.16728.1"; tss_id "TSS12909"; |                                                            |
| chr11 Cufflinks exon 75924104 75924267 .                | - . gene_id "XLOC_010128"; transcript_id "TCONS_00017294"; |
| exon_number "2"; oId "CUFF.16728.1"; tss_id "TSS12909"; |                                                            |

|                                                         |                                                                    |
|---------------------------------------------------------|--------------------------------------------------------------------|
| chr11 Cufflinks exon 76152379 76152683 . - .            | gene_id "XLOC_010134"; transcript_id "TCONS_00017303";             |
| exon_number "1"; oId "CUFF.16745.2"; tss_id "TSS12918"; |                                                                    |
| chr11 Cufflinks exon 76155322 76156300 . - .            | gene_id "XLOC_010134"; transcript_id "TCONS_00017303";             |
| exon_number "2"; oId "CUFF.16745.2"; tss_id "TSS12918"; |                                                                    |
| chr11 Cufflinks exon 78133633 78136241 . - .            | gene_id "XLOC_010162"; transcript_id "TCONS_00017343";             |
| exon_number "1"; oId "CUFF.16861.2"; tss_id "TSS12953"; |                                                                    |
| chr11 Cufflinks exon 78136383 78136451 . - .            | gene_id "XLOC_010162"; transcript_id "TCONS_00017343";             |
| exon_number "2"; oId "CUFF.16861.2"; tss_id "TSS12953"; |                                                                    |
| chr11 Cufflinks exon 78138355 78140737 . - .            | gene_id "XLOC_010162"; transcript_id "TCONS_00017343";             |
| exon_number "3"; oId "CUFF.16861.2"; tss_id "TSS12953"; |                                                                    |
| chr11 Cufflinks exon 78133633 78136241 . - .            | gene_id "XLOC_010162"; transcript_id "TCONS_00017344";             |
| exon_number "1"; oId "CUFF.16861.5"; tss_id "TSS12954"; |                                                                    |
| chr11 Cufflinks exon 78136383 78136451 . - .            | gene_id "XLOC_010162"; transcript_id "TCONS_00017344";             |
| exon_number "2"; oId "CUFF.16861.5"; tss_id "TSS12954"; |                                                                    |
| chr11 Cufflinks exon 78138355 78138484 . - .            | gene_id "XLOC_010162"; transcript_id "TCONS_00017344";             |
| exon_number "3"; oId "CUFF.16861.5"; tss_id "TSS12954"; |                                                                    |
| chr11 Cufflinks exon 78142144 78142240 . - .            | gene_id "XLOC_010162"; transcript_id "TCONS_00017344"; exon_number |
| "4"; oId "CUFF.16861.5"; tss_id "TSS12954";             |                                                                    |
| chr11 Cufflinks exon 78142331 78146240 . - .            | gene_id "XLOC_010162"; transcript_id "TCONS_00017344"; exon_number |
| "5"; oId "CUFF.16861.5"; tss_id "TSS12954";             |                                                                    |
| chr11 Cufflinks exon 114647633 114651364 . - .          | gene_id "XLOC_010351"; transcript_id "TCONS_00017701"; exon_number |
| "1"; oId "CUFF.17583.2"; tss_id "TSS13190";             |                                                                    |
| chr11 Cufflinks exon 114653116 114653168 . - .          | gene_id "XLOC_010351"; transcript_id "TCONS_00017701"; exon_number |
| "2"; oId "CUFF.17583.2"; tss_id "TSS13190";             |                                                                    |
| chr11 Cufflinks exon 114743403 114743508 . - .          | gene_id "XLOC_010351"; transcript_id "TCONS_00017701"; exon_number |
| "3"; oId "CUFF.17583.2"; tss_id "TSS13190";             |                                                                    |
| chr11 Cufflinks exon 114757608 114757777 . - .          | gene_id "XLOC_010351"; transcript_id "TCONS_00017701"; exon_number |
| "4"; oId "CUFF.17583.2"; tss_id "TSS13190";             |                                                                    |
| chr11 Cufflinks exon 114647633 114651364 . - .          | gene_id "XLOC_010351"; transcript_id "TCONS_00017700"; exon_number |
| "1"; oId "CUFF.17583.1"; tss_id "TSS13190";             |                                                                    |
| chr11 Cufflinks exon 114653116 114653168 . - .          | gene_id "XLOC_010351"; transcript_id "TCONS_00017700"; exon_number |
| "2"; oId "CUFF.17583.1"; tss_id "TSS13190";             |                                                                    |
| chr11 Cufflinks exon 114653246 114653602 . - .          | gene_id "XLOC_010351"; transcript_id "TCONS_00017700"; exon_number |
| "3"; oId "CUFF.17583.1"; tss_id "TSS13190";             |                                                                    |
| chr11 Cufflinks exon 114743403 114743508 . - .          | gene_id "XLOC_010351"; transcript_id "TCONS_00017700"; exon_number |
| "4"; oId "CUFF.17583.1"; tss_id "TSS13190";             |                                                                    |
| chr11 Cufflinks exon 114757608 114757777 . - .          | gene_id "XLOC_010351"; transcript_id "TCONS_00017700"; exon_number |
| "5"; oId "CUFF.17583.1"; tss_id "TSS13190";             |                                                                    |
| chr11 Cufflinks exon 117066329 117066750 . - .          | gene_id "XLOC_010368"; transcript_id "TCONS_00017730"; exon_number |
| "1"; oId "CUFF.17616.1"; tss_id "TSS13209";             |                                                                    |
| chr11 Cufflinks exon 117067724 117067862 . - .          | gene_id "XLOC_010368"; transcript_id "TCONS_00017730"; exon_number |
| "2"; oId "CUFF.17616.1"; tss_id "TSS13209";             |                                                                    |
| chr11 Cufflinks exon 117067946 117068120 . - .          | gene_id "XLOC_010368"; transcript_id "TCONS_00017730"; exon_number |

|                                             |   |   |   |                                                                    |  |
|---------------------------------------------|---|---|---|--------------------------------------------------------------------|--|
| "3"; oId "CUFF.17616.1"; tss_id "TSS13209"; |   |   |   |                                                                    |  |
| chr11 Cufflinks exon117068502 117068623     | . | - | . | gene_id "XLOC_010368"; transcript_id "TCONS_00017730"; exon_number |  |
| "4"; oId "CUFF.17616.1"; tss_id "TSS13209"; |   |   |   |                                                                    |  |
| chr11 Cufflinks exon117069035 117069152     | . | - | . | gene_id "XLOC_010368"; transcript_id "TCONS_00017730"; exon_number |  |
| "5"; oId "CUFF.17616.1"; tss_id "TSS13209"; |   |   |   |                                                                    |  |
| chr11 Cufflinks exon117069453 117069504     | . | - | . | gene_id "XLOC_010368"; transcript_id "TCONS_00017730"; exon_number |  |
| "6"; oId "CUFF.17616.1"; tss_id "TSS13209"; |   |   |   |                                                                    |  |
| chr11 Cufflinks exon117070567 117070628     | . | - | . | gene_id "XLOC_010368"; transcript_id "TCONS_00017730"; exon_number |  |
| "7"; oId "CUFF.17616.1"; tss_id "TSS13209"; |   |   |   |                                                                    |  |
| chr11 Cufflinks exon117072477 117072630     | . | - | . | gene_id "XLOC_010368"; transcript_id "TCONS_00017730"; exon_number |  |
| "8"; oId "CUFF.17616.1"; tss_id "TSS13209"; |   |   |   |                                                                    |  |
| chr11 Cufflinks exon119653114 119653281     | . | - | . | gene_id "XLOC_010433"; transcript_id "TCONS_00017858"; exon_number |  |
| "1"; oId "CUFF.17798.1"; tss_id "TSS13303"; |   |   |   |                                                                    |  |
| chr11 Cufflinks exon119653912 119654032     | . | - | . | gene_id "XLOC_010433"; transcript_id "TCONS_00017858"; exon_number |  |
| "2"; oId "CUFF.17798.1"; tss_id "TSS13303"; |   |   |   |                                                                    |  |
| chr11 Cufflinks exon126055480 126056083     | . | - | . | gene_id "XLOC_010480"; transcript_id "TCONS_00017950"; exon_number |  |
| "1"; oId "CUFF.17998.5"; tss_id "TSS13366"; |   |   |   |                                                                    |  |
| chr11 Cufflinks exon126057862 126057981     | . | - | . | gene_id "XLOC_010480"; transcript_id "TCONS_00017950"; exon_number |  |
| "2"; oId "CUFF.17998.5"; tss_id "TSS13366"; |   |   |   |                                                                    |  |
| chr11 Cufflinks exon126211011 126212217     | . | - | . | gene_id "XLOC_010487"; transcript_id "TCONS_00017961"; exon_number |  |
| "1"; oId "CUFF.18018.2"; tss_id "TSS13374"; |   |   |   |                                                                    |  |
| chr11 Cufflinks exon126224613 126225329     | . | - | . | gene_id "XLOC_010487"; transcript_id "TCONS_00017961"; exon_number |  |
| "2"; oId "CUFF.18018.2"; tss_id "TSS13374"; |   |   |   |                                                                    |  |
| chr11 Cufflinks exon126211011 126212217     | . | - | . | gene_id "XLOC_010487"; transcript_id "TCONS_00017962"; exon_number |  |
| "1"; oId "CUFF.18018.1"; tss_id "TSS13375"; |   |   |   |                                                                    |  |
| chr11 Cufflinks exon126225337 126225482     | . | - | . | gene_id "XLOC_010487"; transcript_id "TCONS_00017962"; exon_number |  |
| "2"; oId "CUFF.18018.1"; tss_id "TSS13375"; |   |   |   |                                                                    |  |
| chr11 Cufflinks exon133908522 133908542     | . | - | . | gene_id "XLOC_010555"; transcript_id "TCONS_00018071"; exon_number |  |
| "1"; oId "CUFF.18178.1"; tss_id "TSS13458"; |   |   |   |                                                                    |  |
| chr11 Cufflinks exon134017614 134017972     | . | - | . | gene_id "XLOC_010555"; transcript_id "TCONS_00018071"; exon_number |  |
| "2"; oId "CUFF.18178.1"; tss_id "TSS13458"; |   |   |   |                                                                    |  |
| chr11 Cufflinks exon134307439 134307886     | . | - | . | gene_id "XLOC_010571"; transcript_id "TCONS_00018094"; exon_number |  |
| "1"; oId "CUFF.18225.1"; tss_id "TSS13475"; |   |   |   |                                                                    |  |
| chr11 Cufflinks exon134314173 134314347     | . | - | . | gene_id "XLOC_010571"; transcript_id "TCONS_00018094"; exon_number |  |
| "2"; oId "CUFF.18225.1"; tss_id "TSS13475"; |   |   |   |                                                                    |  |
| chr11 Cufflinks exon134474105 134481821     | . | - | . | gene_id "XLOC_010575"; transcript_id "TCONS_00018099"; exon_number |  |
| "1"; oId "CUFF.18238.2"; tss_id "TSS13480"; |   |   |   |                                                                    |  |
| chr11 Cufflinks exon134484864 134485273     | . | - | . | gene_id "XLOC_010575"; transcript_id "TCONS_00018099"; exon_number |  |
| "2"; oId "CUFF.18238.2"; tss_id "TSS13480"; |   |   |   |                                                                    |  |
| chr11 Cufflinks exon134554924 134557257     | . | - | . | gene_id "XLOC_010584"; transcript_id "TCONS_00018110"; exon_number |  |
| "1"; oId "CUFF.18267.1"; tss_id "TSS13490"; |   |   |   |                                                                    |  |
| chr11 Cufflinks exon134565988 134566041     | . | - | . | gene_id "XLOC_010584"; transcript_id "TCONS_00018110"; exon_number |  |
| "2"; oId "CUFF.18267.1"; tss_id "TSS13490"; |   |   |   |                                                                    |  |



|       |                |           |           |   |   |   |                                                                                                                |
|-------|----------------|-----------|-----------|---|---|---|----------------------------------------------------------------------------------------------------------------|
| chr11 | Cufflinks exon | 134554924 | 134560374 | . | - | . | gene_id "XLOC_010584"; transcript_id "TCONS_00018111"; exon_number "1"; oId "CUFF.18267.3"; tss_id "TSS13491"; |
| chr11 | Cufflinks exon | 134568904 | 134568929 | . | - | . | gene_id "XLOC_010584"; transcript_id "TCONS_00018111"; exon_number "2"; oId "CUFF.18267.3"; tss_id "TSS13491"; |
| chr11 | Cufflinks exon | 134554924 | 134559623 | . | - | . | gene_id "XLOC_010584"; transcript_id "TCONS_00018112"; exon_number "1"; oId "CUFF.18267.4"; tss_id "TSS13492"; |
| chr11 | Cufflinks exon | 134570496 | 134570585 | . | - | . | gene_id "XLOC_010584"; transcript_id "TCONS_00018112"; exon_number "2"; oId "CUFF.18267.4"; tss_id "TSS13492"; |
| chr11 | Cufflinks exon | 134587261 | 134587323 | . | - | . | gene_id "XLOC_010584"; transcript_id "TCONS_00018112"; exon_number "3"; oId "CUFF.18267.4"; tss_id "TSS13492"; |
| chr11 | Cufflinks exon | 134596019 | 134596071 | . | - | . | gene_id "XLOC_010584"; transcript_id "TCONS_00018112"; exon_number "4"; oId "CUFF.18267.4"; tss_id "TSS13492"; |
| chr11 | Cufflinks exon | 134596302 | 134596475 | . | - | . | gene_id "XLOC_010584"; transcript_id "TCONS_00018112"; exon_number "5"; oId "CUFF.18267.4"; tss_id "TSS13492"; |
| chr11 | Cufflinks exon | 134597085 | 134597306 | . | - | . | gene_id "XLOC_010584"; transcript_id "TCONS_00018112"; exon_number "6"; oId "CUFF.18267.4"; tss_id "TSS13492"; |
| chr11 | Cufflinks exon | 134583076 | 134585788 | . | - | . | gene_id "XLOC_010584"; transcript_id "TCONS_00018114"; exon_number "1"; oId "CUFF.18267.6"; tss_id "TSS13493"; |
| chr11 | Cufflinks exon | 134587261 | 134587323 | . | - | . | gene_id "XLOC_010584"; transcript_id "TCONS_00018114"; exon_number "2"; oId "CUFF.18267.6"; tss_id "TSS13493"; |
| chr11 | Cufflinks exon | 134596019 | 134596066 | . | - | . | gene_id "XLOC_010584"; transcript_id "TCONS_00018114"; exon_number "3"; oId "CUFF.18267.6"; tss_id "TSS13493"; |
| chr11 | Cufflinks exon | 134596300 | 134596475 | . | - | . | gene_id "XLOC_010584"; transcript_id "TCONS_00018114"; exon_number "4"; oId "CUFF.18267.6"; tss_id "TSS13493"; |
| chr11 | Cufflinks exon | 134597085 | 134597409 | . | - | . | gene_id "XLOC_010584"; transcript_id "TCONS_00018114"; exon_number "5"; oId "CUFF.18267.6"; tss_id "TSS13493"; |
| chr11 | Cufflinks exon | 134583076 | 134585788 | . | - | . | gene_id "XLOC_010584"; transcript_id "TCONS_00018115"; exon_number "1"; oId "CUFF.18267.5"; tss_id "TSS13493"; |
| chr11 | Cufflinks exon | 134587261 | 134587323 | . | - | . | gene_id "XLOC_010584"; transcript_id "TCONS_00018115"; exon_number "2"; oId "CUFF.18267.5"; tss_id "TSS13493"; |
| chr11 | Cufflinks exon | 134597085 | 134597503 | . | - | . | gene_id "XLOC_010584"; transcript_id "TCONS_00018115"; exon_number "3"; oId "CUFF.18267.5"; tss_id "TSS13493"; |
| chr12 | Cufflinks exon | 752124    | 753268    | . | + | . | gene_id "XLOC_010613"; transcript_id "TCONS_00018154"; exon_number "1"; oId "CUFF.18337.4"; tss_id "TSS13529"; |
| chr12 | Cufflinks exon | 772483    | 773323    | . | + | . | gene_id "XLOC_010613"; transcript_id "TCONS_00018154"; exon_number "2"; oId "CUFF.18337.4"; tss_id "TSS13529"; |
| chr12 | Cufflinks exon | 2951198   | 2952914   | . | + | . | gene_id "XLOC_010638"; transcript_id "TCONS_00018203"; exon_number "1"; oId "CUFF.18453.1"; tss_id "TSS13561"; |
| chr12 | Cufflinks exon | 2953360   | 2957402   | . | + | . | gene_id "XLOC_010638"; transcript_id "TCONS_00018203"; exon_number "2"; oId "CUFF.18453.1"; tss_id "TSS13561"; |
| chr12 | Cufflinks exon | 2958315   | 2959452   | . | + | . | gene_id "XLOC_010638"; transcript_id "TCONS_00018203"; exon_number "3"; oId "CUFF.18453.1"; tss_id "TSS13561"; |
| chr12 | Cufflinks exon | 2957141   | 2957402   | . | + | . | gene_id "XLOC_010638"; transcript_id "TCONS_00018205"; exon_number "1"; oId                                    |

"CUFF.18453.3"; tss\_id "TSS13562";  
chr12 Cufflinks exon2958108 2959452 . + . gene\_id "XLOC\_010638"; transcript\_id "TCONS\_00018205"; exon\_number "2"; oId  
"CUFF.18453.3"; tss\_id "TSS13562";  
chr12 Cufflinks exon2959554 2961889 . + . gene\_id "XLOC\_010639"; transcript\_id "TCONS\_00018206"; exon\_number "1"; oId  
"CUFF.18454.2"; tss\_id "TSS13563";  
chr12 Cufflinks exon2962724 2966797 . + . gene\_id "XLOC\_010639"; transcript\_id "TCONS\_00018206"; exon\_number "2"; oId  
"CUFF.18454.2"; tss\_id "TSS13563";  
chr12 Cufflinks exon7260904 7261077 . + . gene\_id "XLOC\_010712"; transcript\_id "TCONS\_00018308"; exon\_number "1"; oId  
"CUFF.18655.3"; tss\_id "TSS13652";  
chr12 Cufflinks exon7261269 7261543 . + . gene\_id "XLOC\_010712"; transcript\_id "TCONS\_00018308"; exon\_number "2"; oId  
"CUFF.18655.3"; tss\_id "TSS13652";  
chr12 Cufflinks exon7262894 7263168 . + . gene\_id "XLOC\_010712"; transcript\_id "TCONS\_00018308"; exon\_number "3"; oId  
"CUFF.18655.3"; tss\_id "TSS13652";  
chr12 Cufflinks exon7263621 7264202 . + . gene\_id "XLOC\_010712"; transcript\_id "TCONS\_00018308"; exon\_number "4"; oId  
"CUFF.18655.3"; tss\_id "TSS13652";  
chr12 Cufflinks exon7264603 7264660 . + . gene\_id "XLOC\_010712"; transcript\_id "TCONS\_00018308"; exon\_number "5"; oId  
"CUFF.18655.3"; tss\_id "TSS13652";  
chr12 Cufflinks exon7267726 7267815 . + . gene\_id "XLOC\_010712"; transcript\_id "TCONS\_00018308"; exon\_number "6"; oId  
"CUFF.18655.3"; tss\_id "TSS13652";  
chr12 Cufflinks exon7267982 7271273 . + . gene\_id "XLOC\_010712"; transcript\_id "TCONS\_00018308"; exon\_number "7"; oId  
"CUFF.18655.3"; tss\_id "TSS13652";  
chr12 Cufflinks exon7271495 7271622 . + . gene\_id "XLOC\_010712"; transcript\_id "TCONS\_00018308"; exon\_number "8"; oId  
"CUFF.18655.3"; tss\_id "TSS13652";  
chr12 Cufflinks exon7272096 7272149 . + . gene\_id "XLOC\_010712"; transcript\_id "TCONS\_00018308"; exon\_number "9"; oId  
"CUFF.18655.3"; tss\_id "TSS13652";  
chr12 Cufflinks exon7273092 7273221 . + . gene\_id "XLOC\_010712"; transcript\_id "TCONS\_00018308"; exon\_number "10"; oId  
"CUFF.18655.3"; tss\_id "TSS13652";  
chr12 Cufflinks exon7274308 7274447 . + . gene\_id "XLOC\_010712"; transcript\_id "TCONS\_00018308"; exon\_number "11"; oId  
"CUFF.18655.3"; tss\_id "TSS13652";  
chr12 Cufflinks exon7260904 7261077 . + . gene\_id "XLOC\_010712"; transcript\_id "TCONS\_00018307"; exon\_number "1"; oId  
"CUFF.18655.2"; tss\_id "TSS13652";  
chr12 Cufflinks exon7261269 7261543 . + . gene\_id "XLOC\_010712"; transcript\_id "TCONS\_00018307"; exon\_number "2"; oId  
"CUFF.18655.2"; tss\_id "TSS13652";  
chr12 Cufflinks exon7262660 7262743 . + . gene\_id "XLOC\_010712"; transcript\_id "TCONS\_00018307"; exon\_number "3"; oId  
"CUFF.18655.2"; tss\_id "TSS13652";  
chr12 Cufflinks exon7262894 7263168 . + . gene\_id "XLOC\_010712"; transcript\_id "TCONS\_00018307"; exon\_number "4"; oId  
"CUFF.18655.2"; tss\_id "TSS13652";  
chr12 Cufflinks exon7263621 7264202 . + . gene\_id "XLOC\_010712"; transcript\_id "TCONS\_00018307"; exon\_number "5"; oId  
"CUFF.18655.2"; tss\_id "TSS13652";  
chr12 Cufflinks exon7264603 7264660 . + . gene\_id "XLOC\_010712"; transcript\_id "TCONS\_00018307"; exon\_number "6"; oId  
"CUFF.18655.2"; tss\_id "TSS13652";  
chr12 Cufflinks exon7267726 7267815 . + . gene\_id "XLOC\_010712"; transcript\_id "TCONS\_00018307"; exon\_number "7"; oId  
"CUFF.18655.2"; tss\_id "TSS13652";

|       |                       |         |   |   |   |                                                                                                                 |
|-------|-----------------------|---------|---|---|---|-----------------------------------------------------------------------------------------------------------------|
| chr12 | Cufflinks exon7267982 | 7271273 | . | + | . | gene_id "XLOC_010712"; transcript_id "TCONS_00018307"; exon_number "8"; oId "CUFF.18655.2"; tss_id "TSS13652";  |
| chr12 | Cufflinks exon7271495 | 7271622 | . | + | . | gene_id "XLOC_010712"; transcript_id "TCONS_00018307"; exon_number "9"; oId "CUFF.18655.2"; tss_id "TSS13652";  |
| chr12 | Cufflinks exon7272096 | 7272149 | . | + | . | gene_id "XLOC_010712"; transcript_id "TCONS_00018307"; exon_number "10"; oId "CUFF.18655.2"; tss_id "TSS13652"; |
| chr12 | Cufflinks exon7273102 | 7273221 | . | + | . | gene_id "XLOC_010712"; transcript_id "TCONS_00018307"; exon_number "11"; oId "CUFF.18655.2"; tss_id "TSS13652"; |
| chr12 | Cufflinks exon7274308 | 7274447 | . | + | . | gene_id "XLOC_010712"; transcript_id "TCONS_00018307"; exon_number "12"; oId "CUFF.18655.2"; tss_id "TSS13652"; |
| chr12 | Cufflinks exon7260904 | 7261077 | . | + | . | gene_id "XLOC_010712"; transcript_id "TCONS_00018309"; exon_number "1"; oId "CUFF.18655.1"; tss_id "TSS13652";  |
| chr12 | Cufflinks exon7261269 | 7261543 | . | + | . | gene_id "XLOC_010712"; transcript_id "TCONS_00018309"; exon_number "2"; oId "CUFF.18655.1"; tss_id "TSS13652";  |
| chr12 | Cufflinks exon7262660 | 7262743 | . | + | . | gene_id "XLOC_010712"; transcript_id "TCONS_00018309"; exon_number "3"; oId "CUFF.18655.1"; tss_id "TSS13652";  |
| chr12 | Cufflinks exon7262894 | 7263168 | . | + | . | gene_id "XLOC_010712"; transcript_id "TCONS_00018309"; exon_number "4"; oId "CUFF.18655.1"; tss_id "TSS13652";  |
| chr12 | Cufflinks exon7263621 | 7264202 | . | + | . | gene_id "XLOC_010712"; transcript_id "TCONS_00018309"; exon_number "5"; oId "CUFF.18655.1"; tss_id "TSS13652";  |
| chr12 | Cufflinks exon7264603 | 7264660 | . | + | . | gene_id "XLOC_010712"; transcript_id "TCONS_00018309"; exon_number "6"; oId "CUFF.18655.1"; tss_id "TSS13652";  |
| chr12 | Cufflinks exon7267726 | 7267815 | . | + | . | gene_id "XLOC_010712"; transcript_id "TCONS_00018309"; exon_number "7"; oId "CUFF.18655.1"; tss_id "TSS13652";  |
| chr12 | Cufflinks exon7267982 | 7271273 | . | + | . | gene_id "XLOC_010712"; transcript_id "TCONS_00018309"; exon_number "8"; oId "CUFF.18655.1"; tss_id "TSS13652";  |
| chr12 | Cufflinks exon7271495 | 7271622 | . | + | . | gene_id "XLOC_010712"; transcript_id "TCONS_00018309"; exon_number "9"; oId "CUFF.18655.1"; tss_id "TSS13652";  |
| chr12 | Cufflinks exon7272096 | 7272149 | . | + | . | gene_id "XLOC_010712"; transcript_id "TCONS_00018309"; exon_number "10"; oId "CUFF.18655.1"; tss_id "TSS13652"; |
| chr12 | Cufflinks exon7273102 | 7273221 | . | + | . | gene_id "XLOC_010712"; transcript_id "TCONS_00018309"; exon_number "11"; oId "CUFF.18655.1"; tss_id "TSS13652"; |
| chr12 | Cufflinks exon7274841 | 7275135 | . | + | . | gene_id "XLOC_010712"; transcript_id "TCONS_00018309"; exon_number "12"; oId "CUFF.18655.1"; tss_id "TSS13652"; |
| chr12 | Cufflinks exon9499397 | 9499528 | . | + | . | gene_id "XLOC_010760"; transcript_id "TCONS_00018403"; exon_number "1"; oId "CUFF.18826.1"; tss_id "TSS13718";  |
| chr12 | Cufflinks exon9500555 | 9500626 | . | + | . | gene_id "XLOC_010760"; transcript_id "TCONS_00018403"; exon_number "2"; oId "CUFF.18826.1"; tss_id "TSS13718";  |
| chr12 | Cufflinks exon9502618 | 9502713 | . | + | . | gene_id "XLOC_010760"; transcript_id "TCONS_00018403"; exon_number "3"; oId "CUFF.18826.1"; tss_id "TSS13718";  |
| chr12 | Cufflinks exon9504271 | 9504524 | . | + | . | gene_id "XLOC_010760"; transcript_id "TCONS_00018403"; exon_number "4"; oId "CUFF.18826.1"; tss_id "TSS13718";  |
| chr12 | Cufflinks exon9548315 | 9548537 | . | + | . | gene_id "XLOC_010760"; transcript_id "TCONS_00018403"; exon_number "5"; oId                                     |

"CUFF.18826.1"; tss\_id "TSS13718";  
chr12 Cufflinks exon9552294 9554034 . + . gene\_id "XLOC\_010760"; transcript\_id "TCONS\_00018403"; exon\_number "6"; oId  
"CUFF.18826.1"; tss\_id "TSS13718";  
chr12 Cufflinks exon9520060 9522192 . + . gene\_id "XLOC\_010760"; transcript\_id "TCONS\_00018410"; exon\_number "1"; oId  
"CUFF.18826.2"; tss\_id "TSS13719";  
chr12 Cufflinks exon9528454 9528682 . + . gene\_id "XLOC\_010760"; transcript\_id "TCONS\_00018410"; exon\_number "2"; oId  
"CUFF.18826.2"; tss\_id "TSS13719";  
chr12 Cufflinks exon9547127 9547253 . + . gene\_id "XLOC\_010760"; transcript\_id "TCONS\_00018410"; exon\_number "3"; oId  
"CUFF.18826.2"; tss\_id "TSS13719";  
chr12 Cufflinks exon9548315 9550213 . + . gene\_id "XLOC\_010760"; transcript\_id "TCONS\_00018410"; exon\_number "4"; oId  
"CUFF.18826.2"; tss\_id "TSS13719";  
chr12 Cufflinks exon9528037 9528682 . + . gene\_id "XLOC\_010760"; transcript\_id "TCONS\_00018411"; exon\_number "1"; oId  
"CUFF.18826.3"; tss\_id "TSS13720";  
chr12 Cufflinks exon9547127 9547253 . + . gene\_id "XLOC\_010760"; transcript\_id "TCONS\_00018411"; exon\_number "2"; oId  
"CUFF.18826.3"; tss\_id "TSS13720";  
chr12 Cufflinks exon9548315 9550213 . + . gene\_id "XLOC\_010760"; transcript\_id "TCONS\_00018411"; exon\_number "3"; oId  
"CUFF.18826.3"; tss\_id "TSS13720";  
chr12 Cufflinks exon11631405 11631433 . + . gene\_id "XLOC\_010825"; transcript\_id "TCONS\_00018500"; exon\_number  
"1"; oId "CUFF.19244.3"; tss\_id "TSS13797";  
chr12 Cufflinks exon11652882 11653035 . + . gene\_id "XLOC\_010825"; transcript\_id "TCONS\_00018500"; exon\_number  
"2"; oId "CUFF.19244.3"; tss\_id "TSS13797";  
chr12 Cufflinks exon11702524 11702655 . + . gene\_id "XLOC\_010825"; transcript\_id "TCONS\_00018500"; exon\_number  
"3"; oId "CUFF.19244.3"; tss\_id "TSS13797";  
chr12 Cufflinks exon11705514 11705627 . + . gene\_id "XLOC\_010825"; transcript\_id "TCONS\_00018500"; exon\_number  
"4"; oId "CUFF.19244.3"; tss\_id "TSS13797";  
chr12 Cufflinks exon11706109 11707004 . + . gene\_id "XLOC\_010825"; transcript\_id "TCONS\_00018500"; exon\_number  
"5"; oId "CUFF.19244.3"; tss\_id "TSS13797";  
chr12 Cufflinks exon11708189 11710150 . + . gene\_id "XLOC\_010825"; transcript\_id "TCONS\_00018500"; exon\_number  
"6"; oId "CUFF.19244.3"; tss\_id "TSS13797";  
chr12 Cufflinks exon11712225 11712316 . + . gene\_id "XLOC\_010825"; transcript\_id "TCONS\_00018500"; exon\_number  
"7"; oId "CUFF.19244.3"; tss\_id "TSS13797";  
chr12 Cufflinks exon11716635 11717335 . + . gene\_id "XLOC\_010825"; transcript\_id "TCONS\_00018500"; exon\_number  
"8"; oId "CUFF.19244.3"; tss\_id "TSS13797";  
chr12 Cufflinks exon11631405 11631433 . + . gene\_id "XLOC\_010825"; transcript\_id "TCONS\_00018499"; exon\_number  
"1"; oId "CUFF.19244.2"; tss\_id "TSS13797";  
chr12 Cufflinks exon11652882 11653035 . + . gene\_id "XLOC\_010825"; transcript\_id "TCONS\_00018499"; exon\_number  
"2"; oId "CUFF.19244.2"; tss\_id "TSS13797";  
chr12 Cufflinks exon11702524 11702655 . + . gene\_id "XLOC\_010825"; transcript\_id "TCONS\_00018499"; exon\_number  
"3"; oId "CUFF.19244.2"; tss\_id "TSS13797";  
chr12 Cufflinks exon11705514 11705627 . + . gene\_id "XLOC\_010825"; transcript\_id "TCONS\_00018499"; exon\_number  
"4"; oId "CUFF.19244.2"; tss\_id "TSS13797";  
chr12 Cufflinks exon11706500 11707005 . + . gene\_id "XLOC\_010825"; transcript\_id "TCONS\_00018499"; exon\_number  
"5"; oId "CUFF.19244.2"; tss\_id "TSS13797";

|       |                |          |          |   |   |   |                                                                                                                |
|-------|----------------|----------|----------|---|---|---|----------------------------------------------------------------------------------------------------------------|
| chr12 | Cufflinks exon | 11708190 | 11710150 | . | + | . | gene_id "XLOC_010825"; transcript_id "TCONS_00018499"; exon_number "6"; oId "CUFF.19244.2"; tss_id "TSS13797"; |
| chr12 | Cufflinks exon | 11712225 | 11712318 | . | + | . | gene_id "XLOC_010825"; transcript_id "TCONS_00018499"; exon_number "7"; oId "CUFF.19244.2"; tss_id "TSS13797"; |
| chr12 | Cufflinks exon | 11716635 | 11717335 | . | + | . | gene_id "XLOC_010825"; transcript_id "TCONS_00018499"; exon_number "8"; oId "CUFF.19244.2"; tss_id "TSS13797"; |
| chr12 | Cufflinks exon | 11631405 | 11631433 | . | + | . | gene_id "XLOC_010825"; transcript_id "TCONS_00018498"; exon_number "1"; oId "CUFF.19244.1"; tss_id "TSS13797"; |
| chr12 | Cufflinks exon | 11652882 | 11653035 | . | + | . | gene_id "XLOC_010825"; transcript_id "TCONS_00018498"; exon_number "2"; oId "CUFF.19244.1"; tss_id "TSS13797"; |
| chr12 | Cufflinks exon | 11702524 | 11702655 | . | + | . | gene_id "XLOC_010825"; transcript_id "TCONS_00018498"; exon_number "3"; oId "CUFF.19244.1"; tss_id "TSS13797"; |
| chr12 | Cufflinks exon | 11705514 | 11705627 | . | + | . | gene_id "XLOC_010825"; transcript_id "TCONS_00018498"; exon_number "4"; oId "CUFF.19244.1"; tss_id "TSS13797"; |
| chr12 | Cufflinks exon | 11706500 | 11706616 | . | + | . | gene_id "XLOC_010825"; transcript_id "TCONS_00018498"; exon_number "5"; oId "CUFF.19244.1"; tss_id "TSS13797"; |
| chr12 | Cufflinks exon | 11706783 | 11707004 | . | + | . | gene_id "XLOC_010825"; transcript_id "TCONS_00018498"; exon_number "6"; oId "CUFF.19244.1"; tss_id "TSS13797"; |
| chr12 | Cufflinks exon | 11708189 | 11710150 | . | + | . | gene_id "XLOC_010825"; transcript_id "TCONS_00018498"; exon_number "7"; oId "CUFF.19244.1"; tss_id "TSS13797"; |
| chr12 | Cufflinks exon | 11712225 | 11712316 | . | + | . | gene_id "XLOC_010825"; transcript_id "TCONS_00018498"; exon_number "8"; oId "CUFF.19244.1"; tss_id "TSS13797"; |
| chr12 | Cufflinks exon | 11716635 | 11717335 | . | + | . | gene_id "XLOC_010825"; transcript_id "TCONS_00018498"; exon_number "9"; oId "CUFF.19244.1"; tss_id "TSS13797"; |
| chr12 | Cufflinks exon | 11700964 | 11701294 | . | + | . | gene_id "XLOC_010825"; transcript_id "TCONS_00018507"; exon_number "1"; oId "CUFF.19244.4"; tss_id "TSS13798"; |
| chr12 | Cufflinks exon | 11702524 | 11702655 | . | + | . | gene_id "XLOC_010825"; transcript_id "TCONS_00018507"; exon_number "2"; oId "CUFF.19244.4"; tss_id "TSS13798"; |
| chr12 | Cufflinks exon | 11705514 | 11705627 | . | + | . | gene_id "XLOC_010825"; transcript_id "TCONS_00018507"; exon_number "3"; oId "CUFF.19244.4"; tss_id "TSS13798"; |
| chr12 | Cufflinks exon | 11706500 | 11706616 | . | + | . | gene_id "XLOC_010825"; transcript_id "TCONS_00018507"; exon_number "4"; oId "CUFF.19244.4"; tss_id "TSS13798"; |
| chr12 | Cufflinks exon | 11706783 | 11707004 | . | + | . | gene_id "XLOC_010825"; transcript_id "TCONS_00018507"; exon_number "5"; oId "CUFF.19244.4"; tss_id "TSS13798"; |
| chr12 | Cufflinks exon | 11708189 | 11709766 | . | + | . | gene_id "XLOC_010825"; transcript_id "TCONS_00018507"; exon_number "6"; oId "CUFF.19244.4"; tss_id "TSS13798"; |
| chr12 | Cufflinks exon | 11709867 | 11710150 | . | + | . | gene_id "XLOC_010825"; transcript_id "TCONS_00018507"; exon_number "7"; oId "CUFF.19244.4"; tss_id "TSS13798"; |
| chr12 | Cufflinks exon | 11712225 | 11712316 | . | + | . | gene_id "XLOC_010825"; transcript_id "TCONS_00018507"; exon_number "8"; oId "CUFF.19244.4"; tss_id "TSS13798"; |
| chr12 | Cufflinks exon | 11716635 | 11717335 | . | + | . | gene_id "XLOC_010825"; transcript_id "TCONS_00018507"; exon_number "9"; oId "CUFF.19244.4"; tss_id "TSS13798"; |
| chr12 | Cufflinks exon | 11700964 | 11701294 | . | + | . | gene_id "XLOC_010825"; transcript_id "TCONS_00018508"; exon_number                                             |

|                                              |   |   |   |                                                                    |  |
|----------------------------------------------|---|---|---|--------------------------------------------------------------------|--|
| "1"; oId "CUFF.19244.5"; tss_id "TSS13798";  |   |   |   |                                                                    |  |
| chr12 Cufflinks exon11702524 11702655        | . | + | . | gene_id "XLOC_010825"; transcript_id "TCONS_00018508"; exon_number |  |
| "2"; oId "CUFF.19244.5"; tss_id "TSS13798";  |   |   |   |                                                                    |  |
| chr12 Cufflinks exon11705514 11705627        | . | + | . | gene_id "XLOC_010825"; transcript_id "TCONS_00018508"; exon_number |  |
| "3"; oId "CUFF.19244.5"; tss_id "TSS13798";  |   |   |   |                                                                    |  |
| chr12 Cufflinks exon11706500 11706616        | . | + | . | gene_id "XLOC_010825"; transcript_id "TCONS_00018508"; exon_number |  |
| "4"; oId "CUFF.19244.5"; tss_id "TSS13798";  |   |   |   |                                                                    |  |
| chr12 Cufflinks exon11706783 11707004        | . | + | . | gene_id "XLOC_010825"; transcript_id "TCONS_00018508"; exon_number |  |
| "5"; oId "CUFF.19244.5"; tss_id "TSS13798";  |   |   |   |                                                                    |  |
| chr12 Cufflinks exon11708189 11710150        | . | + | . | gene_id "XLOC_010825"; transcript_id "TCONS_00018508"; exon_number |  |
| "6"; oId "CUFF.19244.5"; tss_id "TSS13798";  |   |   |   |                                                                    |  |
| chr12 Cufflinks exon11712225 11712316        | . | + | . | gene_id "XLOC_010825"; transcript_id "TCONS_00018508"; exon_number |  |
| "7"; oId "CUFF.19244.5"; tss_id "TSS13798";  |   |   |   |                                                                    |  |
| chr12 Cufflinks exon11774041 11774060        | . | + | . | gene_id "XLOC_010825"; transcript_id "TCONS_00018508"; exon_number |  |
| "8"; oId "CUFF.19244.5"; tss_id "TSS13798";  |   |   |   |                                                                    |  |
| chr12 Cufflinks exon12983919 12985741        | . | + | . | gene_id "XLOC_010857"; transcript_id "TCONS_00018538"; exon_number |  |
| "1"; oId "CUFF.19347.2"; tss_id "TSS13830";  |   |   |   |                                                                    |  |
| chr12 Cufflinks exon12985929 12988754        | . | + | . | gene_id "XLOC_010857"; transcript_id "TCONS_00018538"; exon_number |  |
| "2"; oId "CUFF.19347.2"; tss_id "TSS13830";  |   |   |   |                                                                    |  |
| chr12 Cufflinks exon12983919 12986074        | . | + | . | gene_id "XLOC_010857"; transcript_id "TCONS_00018539"; exon_number |  |
| "1"; oId "CUFF.19347.1"; tss_id "TSS13830";  |   |   |   |                                                                    |  |
| chr12 Cufflinks exon12992008 12993283        | . | + | . | gene_id "XLOC_010857"; transcript_id "TCONS_00018539"; exon_number |  |
| "2"; oId "CUFF.19347.1"; tss_id "TSS13830";  |   |   |   |                                                                    |  |
| chr12 Cufflinks exon27219810 27219830        | . | + | . | gene_id "XLOC_010951"; transcript_id "TCONS_00018667"; exon_number |  |
| "1"; oId "CUFF.19721.9"; tss_id "TSS13940";  |   |   |   |                                                                    |  |
| chr12 Cufflinks exon27234868 27237690        | . | + | . | gene_id "XLOC_010951"; transcript_id "TCONS_00018667"; exon_number |  |
| "2"; oId "CUFF.19721.9"; tss_id "TSS13940";  |   |   |   |                                                                    |  |
| chr12 Cufflinks exon27274635 27274977        | . | + | . | gene_id "XLOC_010951"; transcript_id "TCONS_00018675"; exon_number |  |
| "1"; oId "CUFF.19721.15"; tss_id "TSS13942"; |   |   |   |                                                                    |  |
| chr12 Cufflinks exon27276109 27276314        | . | + | . | gene_id "XLOC_010951"; transcript_id "TCONS_00018675"; exon_number |  |
| "2"; oId "CUFF.19721.15"; tss_id "TSS13942"; |   |   |   |                                                                    |  |
| chr12 Cufflinks exon27282500 27282635        | . | + | . | gene_id "XLOC_010951"; transcript_id "TCONS_00018675"; exon_number |  |
| "3"; oId "CUFF.19721.15"; tss_id "TSS13942"; |   |   |   |                                                                    |  |
| chr12 Cufflinks exon27286464 27286550        | . | + | . | gene_id "XLOC_010951"; transcript_id "TCONS_00018675"; exon_number |  |
| "4"; oId "CUFF.19721.15"; tss_id "TSS13942"; |   |   |   |                                                                    |  |
| chr12 Cufflinks exon27287906 27288019        | . | + | . | gene_id "XLOC_010951"; transcript_id "TCONS_00018675"; exon_number |  |
| "5"; oId "CUFF.19721.15"; tss_id "TSS13942"; |   |   |   |                                                                    |  |
| chr12 Cufflinks exon27292226 27292387        | . | + | . | gene_id "XLOC_010951"; transcript_id "TCONS_00018675"; exon_number |  |
| "6"; oId "CUFF.19721.15"; tss_id "TSS13942"; |   |   |   |                                                                    |  |
| chr12 Cufflinks exon27292899 27293030        | . | + | . | gene_id "XLOC_010951"; transcript_id "TCONS_00018675"; exon_number |  |
| "7"; oId "CUFF.19721.15"; tss_id "TSS13942"; |   |   |   |                                                                    |  |
| chr12 Cufflinks exon27297925 27298017        | . | + | . | gene_id "XLOC_010951"; transcript_id "TCONS_00018675"; exon_number |  |
| "8"; oId "CUFF.19721.15"; tss_id "TSS13942"; |   |   |   |                                                                    |  |

|       |                |          |          |   |   |   |                                                                                                                  |
|-------|----------------|----------|----------|---|---|---|------------------------------------------------------------------------------------------------------------------|
| chr12 | Cufflinks exon | 27300475 | 27300589 | . | + | . | gene_id "XLOC_010951"; transcript_id "TCONS_00018675"; exon_number "9"; oId "CUFF.19721.15"; tss_id "TSS13942";  |
| chr12 | Cufflinks exon | 27301467 | 27301539 | . | + | . | gene_id "XLOC_010951"; transcript_id "TCONS_00018675"; exon_number "10"; oId "CUFF.19721.15"; tss_id "TSS13942"; |
| chr12 | Cufflinks exon | 27338209 | 27342507 | . | + | . | gene_id "XLOC_010951"; transcript_id "TCONS_00018675"; exon_number "11"; oId "CUFF.19721.15"; tss_id "TSS13942"; |
| chr12 | Cufflinks exon | 27274635 | 27274977 | . | + | . | gene_id "XLOC_010951"; transcript_id "TCONS_00018674"; exon_number "1"; oId "CUFF.19721.14"; tss_id "TSS13942";  |
| chr12 | Cufflinks exon | 27276109 | 27276314 | . | + | . | gene_id "XLOC_010951"; transcript_id "TCONS_00018674"; exon_number "2"; oId "CUFF.19721.14"; tss_id "TSS13942";  |
| chr12 | Cufflinks exon | 27286464 | 27286550 | . | + | . | gene_id "XLOC_010951"; transcript_id "TCONS_00018674"; exon_number "3"; oId "CUFF.19721.14"; tss_id "TSS13942";  |
| chr12 | Cufflinks exon | 27287906 | 27288019 | . | + | . | gene_id "XLOC_010951"; transcript_id "TCONS_00018674"; exon_number "4"; oId "CUFF.19721.14"; tss_id "TSS13942";  |
| chr12 | Cufflinks exon | 27297925 | 27298017 | . | + | . | gene_id "XLOC_010951"; transcript_id "TCONS_00018674"; exon_number "5"; oId "CUFF.19721.14"; tss_id "TSS13942";  |
| chr12 | Cufflinks exon | 27300475 | 27300589 | . | + | . | gene_id "XLOC_010951"; transcript_id "TCONS_00018674"; exon_number "6"; oId "CUFF.19721.14"; tss_id "TSS13942";  |
| chr12 | Cufflinks exon | 27338209 | 27342507 | . | + | . | gene_id "XLOC_010951"; transcript_id "TCONS_00018674"; exon_number "7"; oId "CUFF.19721.14"; tss_id "TSS13942";  |
| chr12 | Cufflinks exon | 27286488 | 27286550 | . | + | . | gene_id "XLOC_010951"; transcript_id "TCONS_00018676"; exon_number "1"; oId "CUFF.19721.16"; tss_id "TSS13943";  |
| chr12 | Cufflinks exon | 27287906 | 27288019 | . | + | . | gene_id "XLOC_010951"; transcript_id "TCONS_00018676"; exon_number "2"; oId "CUFF.19721.16"; tss_id "TSS13943";  |
| chr12 | Cufflinks exon | 27292226 | 27292383 | . | + | . | gene_id "XLOC_010951"; transcript_id "TCONS_00018676"; exon_number "3"; oId "CUFF.19721.16"; tss_id "TSS13943";  |
| chr12 | Cufflinks exon | 27292899 | 27293030 | . | + | . | gene_id "XLOC_010951"; transcript_id "TCONS_00018676"; exon_number "4"; oId "CUFF.19721.16"; tss_id "TSS13943";  |
| chr12 | Cufflinks exon | 27295078 | 27295237 | . | + | . | gene_id "XLOC_010951"; transcript_id "TCONS_00018676"; exon_number "5"; oId "CUFF.19721.16"; tss_id "TSS13943";  |
| chr12 | Cufflinks exon | 27297925 | 27298017 | . | + | . | gene_id "XLOC_010951"; transcript_id "TCONS_00018676"; exon_number "6"; oId "CUFF.19721.16"; tss_id "TSS13943";  |
| chr12 | Cufflinks exon | 27300475 | 27300589 | . | + | . | gene_id "XLOC_010951"; transcript_id "TCONS_00018676"; exon_number "7"; oId "CUFF.19721.16"; tss_id "TSS13943";  |
| chr12 | Cufflinks exon | 27301463 | 27301537 | . | + | . | gene_id "XLOC_010951"; transcript_id "TCONS_00018676"; exon_number "8"; oId "CUFF.19721.16"; tss_id "TSS13943";  |
| chr12 | Cufflinks exon | 27338209 | 27338357 | . | + | . | gene_id "XLOC_010951"; transcript_id "TCONS_00018676"; exon_number "9"; oId "CUFF.19721.16"; tss_id "TSS13943";  |
| chr12 | Cufflinks exon | 27350123 | 27350532 | . | + | . | gene_id "XLOC_010951"; transcript_id "TCONS_00018676"; exon_number "10"; oId "CUFF.19721.16"; tss_id "TSS13943"; |
| chr12 | Cufflinks exon | 27295217 | 27295237 | . | + | . | gene_id "XLOC_010951"; transcript_id "TCONS_00018677"; exon_number "1"; oId "CUFF.19721.17"; tss_id "TSS13944";  |
| chr12 | Cufflinks exon | 27297925 | 27298017 | . | + | . | gene_id "XLOC_010951"; transcript_id "TCONS_00018677"; exon_number "1"; oId "CUFF.19721.17"; tss_id "TSS13944";  |

|                                                                                       |   |   |   |                                                                    |
|---------------------------------------------------------------------------------------|---|---|---|--------------------------------------------------------------------|
| "2"; oId "CUFF.19721.17"; tss_id "TSS13944";<br>chr12 Cufflinks exon27300475 27300589 | . | + | . | gene_id "XLOC_010951"; transcript_id "TCONS_00018677"; exon_number |
| "3"; oId "CUFF.19721.17"; tss_id "TSS13944";<br>chr12 Cufflinks exon27301463 27301537 | . | + | . | gene_id "XLOC_010951"; transcript_id "TCONS_00018677"; exon_number |
| "4"; oId "CUFF.19721.17"; tss_id "TSS13944";<br>chr12 Cufflinks exon27338209 27342507 | . | + | . | gene_id "XLOC_010951"; transcript_id "TCONS_00018677"; exon_number |
| "5"; oId "CUFF.19721.17"; tss_id "TSS13944";<br>chr12 Cufflinks exon42632212 42632463 | . | + | . | gene_id "XLOC_011028"; transcript_id "TCONS_00018801"; exon_number |
| "1"; oId "CUFF.19994.1"; tss_id "TSS14031";<br>chr12 Cufflinks exon42712451 42712470  | . | + | . | gene_id "XLOC_011028"; transcript_id "TCONS_00018801"; exon_number |
| "2"; oId "CUFF.19994.1"; tss_id "TSS14031";<br>chr12 Cufflinks exon42632229 42632529  | . | + | . | gene_id "XLOC_011028"; transcript_id "TCONS_00018802"; exon_number |
| "1"; oId "CUFF.19994.2"; tss_id "TSS14031";<br>chr12 Cufflinks exon42632939 42633044  | . | + | . | gene_id "XLOC_011028"; transcript_id "TCONS_00018802"; exon_number |
| "2"; oId "CUFF.19994.2"; tss_id "TSS14031";<br>chr12 Cufflinks exon46777459 46777944  | . | + | . | gene_id "XLOC_011044"; transcript_id "TCONS_00018829"; exon_number |
| "1"; oId "CUFF.20100.3"; tss_id "TSS14048";<br>chr12 Cufflinks exon46781530 46781755  | . | + | . | gene_id "XLOC_011044"; transcript_id "TCONS_00018829"; exon_number |
| "2"; oId "CUFF.20100.3"; tss_id "TSS14048";<br>chr12 Cufflinks exon46848795 46848924  | . | + | . | gene_id "XLOC_011044"; transcript_id "TCONS_00018829"; exon_number |
| "3"; oId "CUFF.20100.3"; tss_id "TSS14048";<br>chr12 Cufflinks exon46863936 46864045  | . | + | . | gene_id "XLOC_011044"; transcript_id "TCONS_00018829"; exon_number |
| "4"; oId "CUFF.20100.3"; tss_id "TSS14048";<br>chr12 Cufflinks exon46965039 46965195  | . | + | . | gene_id "XLOC_011044"; transcript_id "TCONS_00018829"; exon_number |
| "5"; oId "CUFF.20100.3"; tss_id "TSS14048";<br>chr12 Cufflinks exon46777459 46777496  | . | + | . | gene_id "XLOC_011044"; transcript_id "TCONS_00018832"; exon_number |
| "1"; oId "CUFF.20100.8"; tss_id "TSS14048";<br>chr12 Cufflinks exon46781530 46781755  | . | + | . | gene_id "XLOC_011044"; transcript_id "TCONS_00018832"; exon_number |
| "2"; oId "CUFF.20100.8"; tss_id "TSS14048";<br>chr12 Cufflinks exon47046173 47046362  | . | + | . | gene_id "XLOC_011044"; transcript_id "TCONS_00018832"; exon_number |
| "3"; oId "CUFF.20100.8"; tss_id "TSS14048";<br>chr12 Cufflinks exon46777459 46777478  | . | + | . | gene_id "XLOC_011044"; transcript_id "TCONS_00018831"; exon_number |
| "1"; oId "CUFF.20100.2"; tss_id "TSS14048";<br>chr12 Cufflinks exon46781530 46781755  | . | + | . | gene_id "XLOC_011044"; transcript_id "TCONS_00018831"; exon_number |
| "2"; oId "CUFF.20100.2"; tss_id "TSS14048";<br>chr12 Cufflinks exon46863936 46864045  | . | + | . | gene_id "XLOC_011044"; transcript_id "TCONS_00018831"; exon_number |
| "3"; oId "CUFF.20100.2"; tss_id "TSS14048";<br>chr12 Cufflinks exon46965039 46965195  | . | + | . | gene_id "XLOC_011044"; transcript_id "TCONS_00018831"; exon_number |
| "4"; oId "CUFF.20100.2"; tss_id "TSS14048";<br>chr12 Cufflinks exon47046173 47046362  | . | + | . | gene_id "XLOC_011044"; transcript_id "TCONS_00018831"; exon_number |
| "5"; oId "CUFF.20100.2"; tss_id "TSS14048";<br>chr12 Cufflinks exon46777459 46777496  | . | + | . | gene_id "XLOC_011044"; transcript_id "TCONS_00018830"; exon_number |
| "1"; oId "CUFF.20100.1"; tss_id "TSS14048";                                           | . | + | . |                                                                    |



|       |                        |          |   |   |   |                                                                                                                 |
|-------|------------------------|----------|---|---|---|-----------------------------------------------------------------------------------------------------------------|
| chr12 | Cufflinks exon46781530 | 46781755 | . | + | . | gene_id "XLOC_011044"; transcript_id "TCONS_00018830"; exon_number "2"; oId "CUFF.20100.1"; tss_id "TSS14048";  |
| chr12 | Cufflinks exon46965039 | 46965195 | . | + | . | gene_id "XLOC_011044"; transcript_id "TCONS_00018830"; exon_number "3"; oId "CUFF.20100.1"; tss_id "TSS14048";  |
| chr12 | Cufflinks exon47046173 | 47046362 | . | + | . | gene_id "XLOC_011044"; transcript_id "TCONS_00018830"; exon_number "4"; oId "CUFF.20100.1"; tss_id "TSS14048";  |
| chr12 | Cufflinks exon46777459 | 46777478 | . | + | . | gene_id "XLOC_011044"; transcript_id "TCONS_00018833"; exon_number "1"; oId "CUFF.20100.7"; tss_id "TSS14048";  |
| chr12 | Cufflinks exon46781530 | 46781755 | . | + | . | gene_id "XLOC_011044"; transcript_id "TCONS_00018833"; exon_number "2"; oId "CUFF.20100.7"; tss_id "TSS14048";  |
| chr12 | Cufflinks exon46863936 | 46864045 | . | + | . | gene_id "XLOC_011044"; transcript_id "TCONS_00018833"; exon_number "3"; oId "CUFF.20100.7"; tss_id "TSS14048";  |
| chr12 | Cufflinks exon47046173 | 47046335 | . | + | . | gene_id "XLOC_011044"; transcript_id "TCONS_00018833"; exon_number "4"; oId "CUFF.20100.7"; tss_id "TSS14048";  |
| chr12 | Cufflinks exon47080957 | 47081742 | . | + | . | gene_id "XLOC_011044"; transcript_id "TCONS_00018833"; exon_number "5"; oId "CUFF.20100.7"; tss_id "TSS14048";  |
| chr12 | Cufflinks exon46777597 | 46777944 | . | + | . | gene_id "XLOC_011044"; transcript_id "TCONS_00018834"; exon_number "1"; oId "CUFF.20100.9"; tss_id "TSS14049";  |
| chr12 | Cufflinks exon46781530 | 46781755 | . | + | . | gene_id "XLOC_011044"; transcript_id "TCONS_00018834"; exon_number "2"; oId "CUFF.20100.9"; tss_id "TSS14049";  |
| chr12 | Cufflinks exon46863936 | 46864045 | . | + | . | gene_id "XLOC_011044"; transcript_id "TCONS_00018834"; exon_number "3"; oId "CUFF.20100.9"; tss_id "TSS14049";  |
| chr12 | Cufflinks exon46965039 | 46965195 | . | + | . | gene_id "XLOC_011044"; transcript_id "TCONS_00018834"; exon_number "4"; oId "CUFF.20100.9"; tss_id "TSS14049";  |
| chr12 | Cufflinks exon47046173 | 47046362 | . | + | . | gene_id "XLOC_011044"; transcript_id "TCONS_00018834"; exon_number "5"; oId "CUFF.20100.9"; tss_id "TSS14049";  |
| chr12 | Cufflinks exon46778632 | 46778700 | . | + | . | gene_id "XLOC_011044"; transcript_id "TCONS_00018835"; exon_number "1"; oId "CUFF.20100.10"; tss_id "TSS14050"; |
| chr12 | Cufflinks exon46781530 | 46781755 | . | + | . | gene_id "XLOC_011044"; transcript_id "TCONS_00018835"; exon_number "2"; oId "CUFF.20100.10"; tss_id "TSS14050"; |
| chr12 | Cufflinks exon46863936 | 46864045 | . | + | . | gene_id "XLOC_011044"; transcript_id "TCONS_00018835"; exon_number "3"; oId "CUFF.20100.10"; tss_id "TSS14050"; |
| chr12 | Cufflinks exon46965039 | 46965195 | . | + | . | gene_id "XLOC_011044"; transcript_id "TCONS_00018835"; exon_number "4"; oId "CUFF.20100.10"; tss_id "TSS14050"; |
| chr12 | Cufflinks exon47046173 | 47046335 | . | + | . | gene_id "XLOC_011044"; transcript_id "TCONS_00018835"; exon_number "5"; oId "CUFF.20100.10"; tss_id "TSS14050"; |
| chr12 | Cufflinks exon47270358 | 47270546 | . | + | . | gene_id "XLOC_011044"; transcript_id "TCONS_00018835"; exon_number "6"; oId "CUFF.20100.10"; tss_id "TSS14050"; |
| chr12 | Cufflinks exon47174274 | 47174472 | . | + | . | gene_id "XLOC_011044"; transcript_id "TCONS_00018853"; exon_number "1"; oId "CUFF.20100.11"; tss_id "TSS14051"; |
| chr12 | Cufflinks exon47270358 | 47270546 | . | + | . | gene_id "XLOC_011044"; transcript_id "TCONS_00018853"; exon_number "2"; oId "CUFF.20100.11"; tss_id "TSS14051"; |
| chr12 | Cufflinks exon48152771 | 48152932 | . | + | . | gene_id "XLOC_011076"; transcript_id "TCONS_00018875"; exon_number                                              |

|                                             |   |   |   |                                                                    |  |
|---------------------------------------------|---|---|---|--------------------------------------------------------------------|--|
| "1"; oId "CUFF.20189.1"; tss_id "TSS14086"; |   |   |   |                                                                    |  |
| chr12 Cufflinks exon48153999 48154184       | . | + | . | gene_id "XLOC_011076"; transcript_id "TCONS_00018875"; exon_number |  |
| "2"; oId "CUFF.20189.1"; tss_id "TSS14086"; |   |   |   |                                                                    |  |
| chr12 Cufflinks exon48165953 48166104       | . | + | . | gene_id "XLOC_011076"; transcript_id "TCONS_00018875"; exon_number |  |
| "3"; oId "CUFF.20189.1"; tss_id "TSS14086"; |   |   |   |                                                                    |  |
| chr12 Cufflinks exon48153414 48154184       | . | + | . | gene_id "XLOC_011076"; transcript_id "TCONS_00018876"; exon_number |  |
| "1"; oId "CUFF.20189.2"; tss_id "TSS14087"; |   |   |   |                                                                    |  |
| chr12 Cufflinks exon48165953 48166104       | . | + | . | gene_id "XLOC_011076"; transcript_id "TCONS_00018876"; exon_number |  |
| "2"; oId "CUFF.20189.2"; tss_id "TSS14087"; |   |   |   |                                                                    |  |
| chr12 Cufflinks exon49182930 49183010       | . | + | . | gene_id "XLOC_011104"; transcript_id "TCONS_00018908"; exon_number |  |
| "1"; oId "CUFF.20261.1"; tss_id "TSS14116"; |   |   |   |                                                                    |  |
| chr12 Cufflinks exon49183768 49183902       | . | + | . | gene_id "XLOC_011104"; transcript_id "TCONS_00018908"; exon_number |  |
| "2"; oId "CUFF.20261.1"; tss_id "TSS14116"; |   |   |   |                                                                    |  |
| chr12 Cufflinks exon49184096 49184318       | . | + | . | gene_id "XLOC_011104"; transcript_id "TCONS_00018908"; exon_number |  |
| "3"; oId "CUFF.20261.1"; tss_id "TSS14116"; |   |   |   |                                                                    |  |
| chr12 Cufflinks exon49183359 49183473       | . | + | . | gene_id "XLOC_011104"; transcript_id "TCONS_00018909"; exon_number |  |
| "1"; oId "CUFF.20261.2"; tss_id "TSS14117"; |   |   |   |                                                                    |  |
| chr12 Cufflinks exon49183768 49183902       | . | + | . | gene_id "XLOC_011104"; transcript_id "TCONS_00018909"; exon_number |  |
| "2"; oId "CUFF.20261.2"; tss_id "TSS14117"; |   |   |   |                                                                    |  |
| chr12 Cufflinks exon49184096 49184318       | . | + | . | gene_id "XLOC_011104"; transcript_id "TCONS_00018909"; exon_number |  |
| "3"; oId "CUFF.20261.2"; tss_id "TSS14117"; |   |   |   |                                                                    |  |
| chr12 Cufflinks exon49961980 49962506       | . | + | . | gene_id "XLOC_011119"; transcript_id "TCONS_00018941"; exon_number |  |
| "1"; oId "CUFF.20331.2"; tss_id "TSS14134"; |   |   |   |                                                                    |  |
| chr12 Cufflinks exon49977345 49999777       | . | + | . | gene_id "XLOC_011119"; transcript_id "TCONS_00018941"; exon_number |  |
| "2"; oId "CUFF.20331.2"; tss_id "TSS14134"; |   |   |   |                                                                    |  |
| chr12 Cufflinks exon49961988 49962506       | . | + | . | gene_id "XLOC_011119"; transcript_id "TCONS_00018942"; exon_number |  |
| "1"; oId "CUFF.20331.3"; tss_id "TSS14134"; |   |   |   |                                                                    |  |
| chr12 Cufflinks exon49967441 49967511       | . | + | . | gene_id "XLOC_011119"; transcript_id "TCONS_00018942"; exon_number |  |
| "2"; oId "CUFF.20331.3"; tss_id "TSS14134"; |   |   |   |                                                                    |  |
| chr12 Cufflinks exon49977345 49980357       | . | + | . | gene_id "XLOC_011119"; transcript_id "TCONS_00018942"; exon_number |  |
| "3"; oId "CUFF.20331.3"; tss_id "TSS14134"; |   |   |   |                                                                    |  |
| chr12 Cufflinks exon49988928 49999777       | . | + | . | gene_id "XLOC_011119"; transcript_id "TCONS_00018942"; exon_number |  |
| "4"; oId "CUFF.20331.3"; tss_id "TSS14134"; |   |   |   |                                                                    |  |
| chr12 Cufflinks exon49962006 49962506       | . | + | . | gene_id "XLOC_011119"; transcript_id "TCONS_00018944"; exon_number |  |
| "1"; oId "CUFF.20331.5"; tss_id "TSS14134"; |   |   |   |                                                                    |  |
| chr12 Cufflinks exon49993848 49999777       | . | + | . | gene_id "XLOC_011119"; transcript_id "TCONS_00018944"; exon_number |  |
| "2"; oId "CUFF.20331.5"; tss_id "TSS14134"; |   |   |   |                                                                    |  |
| chr12 Cufflinks exon49962006 49962506       | . | + | . | gene_id "XLOC_011119"; transcript_id "TCONS_00018943"; exon_number |  |
| "1"; oId "CUFF.20331.4"; tss_id "TSS14134"; |   |   |   |                                                                    |  |
| chr12 Cufflinks exon49967441 49967511       | . | + | . | gene_id "XLOC_011119"; transcript_id "TCONS_00018943"; exon_number |  |
| "2"; oId "CUFF.20331.4"; tss_id "TSS14134"; |   |   |   |                                                                    |  |
| chr12 Cufflinks exon49975170 49975190       | . | + | . | gene_id "XLOC_011119"; transcript_id "TCONS_00018943"; exon_number |  |
| "3"; oId "CUFF.20331.4"; tss_id "TSS14134"; |   |   |   |                                                                    |  |

|       |                        |          |   |   |   |                                                                                                                |
|-------|------------------------|----------|---|---|---|----------------------------------------------------------------------------------------------------------------|
| chr12 | Cufflinks exon49976713 | 49999777 | . | + | . | gene_id "XLOC_011119"; transcript_id "TCONS_00018943"; exon_number "4"; oId "CUFF.20331.4"; tss_id "TSS14134"; |
| chr12 | Cufflinks exon50677416 | 50677665 | . | + | . | gene_id "XLOC_011130"; transcript_id "TCONS_00018969"; exon_number "1"; oId "CUFF.20367.3"; tss_id "TSS14154"; |
| chr12 | Cufflinks exon50689459 | 50689576 | . | + | . | gene_id "XLOC_011130"; transcript_id "TCONS_00018969"; exon_number "2"; oId "CUFF.20367.3"; tss_id "TSS14154"; |
| chr12 | Cufflinks exon50780755 | 50780832 | . | + | . | gene_id "XLOC_011130"; transcript_id "TCONS_00018969"; exon_number "3"; oId "CUFF.20367.3"; tss_id "TSS14154"; |
| chr12 | Cufflinks exon54149912 | 54150027 | . | + | . | gene_id "XLOC_011220"; transcript_id "TCONS_00019123"; exon_number "1"; oId "CUFF.20640.1"; tss_id "TSS14271"; |
| chr12 | Cufflinks exon54155612 | 54156042 | . | + | . | gene_id "XLOC_011220"; transcript_id "TCONS_00019123"; exon_number "2"; oId "CUFF.20640.1"; tss_id "TSS14271"; |
| chr12 | Cufflinks exon54149936 | 54150027 | . | + | . | gene_id "XLOC_011220"; transcript_id "TCONS_00019124"; exon_number "1"; oId "CUFF.20640.2"; tss_id "TSS14271"; |
| chr12 | Cufflinks exon54163678 | 54163750 | . | + | . | gene_id "XLOC_011220"; transcript_id "TCONS_00019124"; exon_number "2"; oId "CUFF.20640.2"; tss_id "TSS14271"; |
| chr12 | Cufflinks exon54242645 | 54242740 | . | + | . | gene_id "XLOC_011220"; transcript_id "TCONS_00019124"; exon_number "3"; oId "CUFF.20640.2"; tss_id "TSS14271"; |
| chr12 | Cufflinks exon54244094 | 54244196 | . | + | . | gene_id "XLOC_011220"; transcript_id "TCONS_00019124"; exon_number "4"; oId "CUFF.20640.2"; tss_id "TSS14271"; |
| chr12 | Cufflinks exon54289981 | 54293120 | . | + | . | gene_id "XLOC_011220"; transcript_id "TCONS_00019124"; exon_number "5"; oId "CUFF.20640.2"; tss_id "TSS14271"; |
| chr12 | Cufflinks exon54227600 | 54227667 | . | + | . | gene_id "XLOC_011220"; transcript_id "TCONS_00019125"; exon_number "1"; oId "CUFF.20640.3"; tss_id "TSS14272"; |
| chr12 | Cufflinks exon54242643 | 54242740 | . | + | . | gene_id "XLOC_011220"; transcript_id "TCONS_00019125"; exon_number "2"; oId "CUFF.20640.3"; tss_id "TSS14272"; |
| chr12 | Cufflinks exon54244094 | 54244196 | . | + | . | gene_id "XLOC_011220"; transcript_id "TCONS_00019125"; exon_number "3"; oId "CUFF.20640.3"; tss_id "TSS14272"; |
| chr12 | Cufflinks exon54268939 | 54269032 | . | + | . | gene_id "XLOC_011220"; transcript_id "TCONS_00019125"; exon_number "4"; oId "CUFF.20640.3"; tss_id "TSS14272"; |
| chr12 | Cufflinks exon54289981 | 54293120 | . | + | . | gene_id "XLOC_011220"; transcript_id "TCONS_00019125"; exon_number "5"; oId "CUFF.20640.3"; tss_id "TSS14272"; |
| chr12 | Cufflinks exon55378619 | 55378749 | . | + | . | gene_id "XLOC_011267"; transcript_id "TCONS_00019185"; exon_number "1"; oId "CUFF.20759.1"; tss_id "TSS14323"; |
| chr12 | Cufflinks exon55398346 | 55398544 | . | + | . | gene_id "XLOC_011267"; transcript_id "TCONS_00019185"; exon_number "2"; oId "CUFF.20759.1"; tss_id "TSS14323"; |
| chr12 | Cufflinks exon55407802 | 55407822 | . | + | . | gene_id "XLOC_011267"; transcript_id "TCONS_00019185"; exon_number "3"; oId "CUFF.20759.1"; tss_id "TSS14323"; |
| chr12 | Cufflinks exon62996630 | 63002663 | . | + | . | gene_id "XLOC_011353"; transcript_id "TCONS_00019342"; exon_number "1"; oId "CUFF.21159.9"; tss_id "TSS14435"; |
| chr12 | Cufflinks exon63003831 | 63003938 | . | + | . | gene_id "XLOC_011353"; transcript_id "TCONS_00019342"; exon_number "2"; oId "CUFF.21159.9"; tss_id "TSS14435"; |
| chr12 | Cufflinks exon63007385 | 63015956 | . | + | . | gene_id "XLOC_011353"; transcript_id "TCONS_00019342"; exon_number "3"; oId "CUFF.21159.9"; tss_id "TSS14435"; |



|                                              |                        |          |   |   |   |                                                                    |
|----------------------------------------------|------------------------|----------|---|---|---|--------------------------------------------------------------------|
| chr12                                        | Cufflinks exon76956075 | 76956138 | . | + | . | gene_id "XLOC_011455"; transcript_id "TCONS_00019514"; exon_number |
| "2"; oId "CUFF.21523.5"; tss_id "TSS14556";  |                        |          |   |   |   |                                                                    |
| chr12                                        | Cufflinks exon76964491 | 76964546 | . | + | . | gene_id "XLOC_011455"; transcript_id "TCONS_00019514"; exon_number |
| "3"; oId "CUFF.21523.5"; tss_id "TSS14556";  |                        |          |   |   |   |                                                                    |
| chr12                                        | Cufflinks exon77026701 | 77026836 | . | + | . | gene_id "XLOC_011455"; transcript_id "TCONS_00019514"; exon_number |
| "4"; oId "CUFF.21523.5"; tss_id "TSS14556";  |                        |          |   |   |   |                                                                    |
| chr12                                        | Cufflinks exon77061835 | 77062120 | . | + | . | gene_id "XLOC_011455"; transcript_id "TCONS_00019514"; exon_number |
| "5"; oId "CUFF.21523.5"; tss_id "TSS14556";  |                        |          |   |   |   |                                                                    |
| chr12                                        | Cufflinks exon76953651 | 76954013 | . | + | . | gene_id "XLOC_011455"; transcript_id "TCONS_00019515"; exon_number |
| "1"; oId "CUFF.21523.9"; tss_id "TSS14556";  |                        |          |   |   |   |                                                                    |
| chr12                                        | Cufflinks exon76956075 | 76956138 | . | + | . | gene_id "XLOC_011455"; transcript_id "TCONS_00019515"; exon_number |
| "2"; oId "CUFF.21523.9"; tss_id "TSS14556";  |                        |          |   |   |   |                                                                    |
| chr12                                        | Cufflinks exon77026701 | 77026836 | . | + | . | gene_id "XLOC_011455"; transcript_id "TCONS_00019515"; exon_number |
| "3"; oId "CUFF.21523.9"; tss_id "TSS14556";  |                        |          |   |   |   |                                                                    |
| chr12                                        | Cufflinks exon77084826 | 77084890 | . | + | . | gene_id "XLOC_011455"; transcript_id "TCONS_00019515"; exon_number |
| "4"; oId "CUFF.21523.9"; tss_id "TSS14556";  |                        |          |   |   |   |                                                                    |
| chr12                                        | Cufflinks exon77104016 | 77104048 | . | + | . | gene_id "XLOC_011455"; transcript_id "TCONS_00019515"; exon_number |
| "5"; oId "CUFF.21523.9"; tss_id "TSS14556";  |                        |          |   |   |   |                                                                    |
| chr12                                        | Cufflinks exon76953651 | 76954013 | . | + | . | gene_id "XLOC_011455"; transcript_id "TCONS_00019518"; exon_number |
| "1"; oId "CUFF.21523.8"; tss_id "TSS14556";  |                        |          |   |   |   |                                                                    |
| chr12                                        | Cufflinks exon76956075 | 76956146 | . | + | . | gene_id "XLOC_011455"; transcript_id "TCONS_00019518"; exon_number |
| "2"; oId "CUFF.21523.8"; tss_id "TSS14556";  |                        |          |   |   |   |                                                                    |
| chr12                                        | Cufflinks exon76964499 | 76964546 | . | + | . | gene_id "XLOC_011455"; transcript_id "TCONS_00019518"; exon_number |
| "3"; oId "CUFF.21523.8"; tss_id "TSS14556";  |                        |          |   |   |   |                                                                    |
| chr12                                        | Cufflinks exon77026701 | 77026836 | . | + | . | gene_id "XLOC_011455"; transcript_id "TCONS_00019518"; exon_number |
| "4"; oId "CUFF.21523.8"; tss_id "TSS14556";  |                        |          |   |   |   |                                                                    |
| chr12                                        | Cufflinks exon77111687 | 77111969 | . | + | . | gene_id "XLOC_011455"; transcript_id "TCONS_00019518"; exon_number |
| "5"; oId "CUFF.21523.8"; tss_id "TSS14556";  |                        |          |   |   |   |                                                                    |
| chr12                                        | Cufflinks exon76953651 | 76954013 | . | + | . | gene_id "XLOC_011455"; transcript_id "TCONS_00019517"; exon_number |
| "1"; oId "CUFF.21523.6"; tss_id "TSS14556";  |                        |          |   |   |   |                                                                    |
| chr12                                        | Cufflinks exon76956075 | 76956138 | . | + | . | gene_id "XLOC_011455"; transcript_id "TCONS_00019517"; exon_number |
| "2"; oId "CUFF.21523.6"; tss_id "TSS14556";  |                        |          |   |   |   |                                                                    |
| chr12                                        | Cufflinks exon76964491 | 76964546 | . | + | . | gene_id "XLOC_011455"; transcript_id "TCONS_00019517"; exon_number |
| "3"; oId "CUFF.21523.6"; tss_id "TSS14556";  |                        |          |   |   |   |                                                                    |
| chr12                                        | Cufflinks exon77026701 | 77026836 | . | + | . | gene_id "XLOC_011455"; transcript_id "TCONS_00019517"; exon_number |
| "4"; oId "CUFF.21523.6"; tss_id "TSS14556";  |                        |          |   |   |   |                                                                    |
| chr12                                        | Cufflinks exon77084826 | 77084885 | . | + | . | gene_id "XLOC_011455"; transcript_id "TCONS_00019517"; exon_number |
| "5"; oId "CUFF.21523.6"; tss_id "TSS14556";  |                        |          |   |   |   |                                                                    |
| chr12                                        | Cufflinks exon77111687 | 77111969 | . | + | . | gene_id "XLOC_011455"; transcript_id "TCONS_00019517"; exon_number |
| "6"; oId "CUFF.21523.6"; tss_id "TSS14556";  |                        |          |   |   |   |                                                                    |
| chr12                                        | Cufflinks exon76953651 | 76954013 | . | + | . | gene_id "XLOC_011455"; transcript_id "TCONS_00019516"; exon_number |
| "1"; oId "CUFF.21523.10"; tss_id "TSS14556"; |                        |          |   |   |   |                                                                    |
| chr12                                        | Cufflinks exon76956075 | 76956144 | . | + | . | gene_id "XLOC_011455"; transcript_id "TCONS_00019516"; exon_number |

"2"; oId "CUFF.21523.10"; tss\_id "TSS14556";  
chr12 Cufflinks exon76964497 76964546 . + . gene\_id "XLOC\_011455"; transcript\_id "TCONS\_00019516"; exon\_number  
"3"; oId "CUFF.21523.10"; tss\_id "TSS14556";  
chr12 Cufflinks exon77026701 77026836 . + . gene\_id "XLOC\_011455"; transcript\_id "TCONS\_00019516"; exon\_number  
"4"; oId "CUFF.21523.10"; tss\_id "TSS14556";  
chr12 Cufflinks exon77084826 77084885 . + . gene\_id "XLOC\_011455"; transcript\_id "TCONS\_00019516"; exon\_number  
"5"; oId "CUFF.21523.10"; tss\_id "TSS14556";  
chr12 Cufflinks exon77111687 77111969 . + . gene\_id "XLOC\_011455"; transcript\_id "TCONS\_00019516"; exon\_number  
"6"; oId "CUFF.21523.10"; tss\_id "TSS14556";  
chr12 Cufflinks exon76953652 76954013 . + . gene\_id "XLOC\_011455"; transcript\_id "TCONS\_00019519"; exon\_number  
"1"; oId "CUFF.21523.11"; tss\_id "TSS14556";  
chr12 Cufflinks exon76956075 76956138 . + . gene\_id "XLOC\_011455"; transcript\_id "TCONS\_00019519"; exon\_number  
"2"; oId "CUFF.21523.11"; tss\_id "TSS14556";  
chr12 Cufflinks exon76964491 76964546 . + . gene\_id "XLOC\_011455"; transcript\_id "TCONS\_00019519"; exon\_number  
"3"; oId "CUFF.21523.11"; tss\_id "TSS14556";  
chr12 Cufflinks exon76984161 76984219 . + . gene\_id "XLOC\_011455"; transcript\_id "TCONS\_00019519"; exon\_number  
"4"; oId "CUFF.21523.11"; tss\_id "TSS14556";  
chr12 Cufflinks exon76953652 76954013 . + . gene\_id "XLOC\_011455"; transcript\_id "TCONS\_00019520"; exon\_number  
"1"; oId "CUFF.21523.12"; tss\_id "TSS14556";  
chr12 Cufflinks exon76956075 76956138 . + . gene\_id "XLOC\_011455"; transcript\_id "TCONS\_00019520"; exon\_number  
"2"; oId "CUFF.21523.12"; tss\_id "TSS14556";  
chr12 Cufflinks exon77011871 77011885 . + . gene\_id "XLOC\_011455"; transcript\_id "TCONS\_00019520"; exon\_number  
"3"; oId "CUFF.21523.12"; tss\_id "TSS14556";  
chr12 Cufflinks exon76953652 76954013 . + . gene\_id "XLOC\_011455"; transcript\_id "TCONS\_00019521"; exon\_number  
"1"; oId "CUFF.21523.13"; tss\_id "TSS14556";  
chr12 Cufflinks exon76956075 76956144 . + . gene\_id "XLOC\_011455"; transcript\_id "TCONS\_00019521"; exon\_number  
"2"; oId "CUFF.21523.13"; tss\_id "TSS14556";  
chr12 Cufflinks exon76964497 76964546 . + . gene\_id "XLOC\_011455"; transcript\_id "TCONS\_00019521"; exon\_number  
"3"; oId "CUFF.21523.13"; tss\_id "TSS14556";  
chr12 Cufflinks exon77070264 77070362 . + . gene\_id "XLOC\_011455"; transcript\_id "TCONS\_00019521"; exon\_number  
"4"; oId "CUFF.21523.13"; tss\_id "TSS14556";  
chr12 Cufflinks exon76953654 76954013 . + . gene\_id "XLOC\_011455"; transcript\_id "TCONS\_00019522"; exon\_number  
"1"; oId "CUFF.21523.15"; tss\_id "TSS14556";  
chr12 Cufflinks exon76956075 76956142 . + . gene\_id "XLOC\_011455"; transcript\_id "TCONS\_00019522"; exon\_number  
"2"; oId "CUFF.21523.15"; tss\_id "TSS14556";  
chr12 Cufflinks exon76964495 76964546 . + . gene\_id "XLOC\_011455"; transcript\_id "TCONS\_00019522"; exon\_number  
"3"; oId "CUFF.21523.15"; tss\_id "TSS14556";  
chr12 Cufflinks exon 77026701 77026836 . + . gene\_id "XLOC\_011455"; transcript\_id "TCONS\_00019522";  
exon\_number "4"; oId "CUFF.21523.15"; tss\_id "TSS14556";  
chr12 Cufflinks exon 77069936 77069972 . + . gene\_id "XLOC\_011455"; transcript\_id "TCONS\_00019522";  
exon\_number "5"; oId "CUFF.21523.15"; tss\_id "TSS14556";  
chr12 Cufflinks exon 76953654 76954013 . + . gene\_id "XLOC\_011455"; transcript\_id "TCONS\_00019523";  
exon\_number "1"; oId "CUFF.21523.14"; tss\_id "TSS14556";

chr12 Cufflinks exon 76956075 76956138 . + . gene\_id "XLOC\_011455"; transcript\_id "TCONS\_00019523";  
exon\_number "2"; oId "CUFF.21523.14"; tss\_id "TSS14556";  
chr12 Cufflinks exon 77026706 77026836 . + . gene\_id "XLOC\_011455"; transcript\_id "TCONS\_00019523";  
exon\_number "3"; oId "CUFF.21523.14"; tss\_id "TSS14556";  
chr12 Cufflinks exon 77111687 77111969 . + . gene\_id "XLOC\_011455"; transcript\_id "TCONS\_00019523";  
exon\_number "4"; oId "CUFF.21523.14"; tss\_id "TSS14556";  
chr12 Cufflinks exon 76953663 76954013 . + . gene\_id "XLOC\_011455"; transcript\_id "TCONS\_00019524";  
exon\_number "1"; oId "CUFF.21523.16"; tss\_id "TSS14556";  
chr12 Cufflinks exon 76956075 76956138 . + . gene\_id "XLOC\_011455"; transcript\_id "TCONS\_00019524";  
exon\_number "2"; oId "CUFF.21523.16"; tss\_id "TSS14556";  
chr12 Cufflinks exon 76964491 76964552 . + . gene\_id "XLOC\_011455"; transcript\_id "TCONS\_00019524";  
exon\_number "3"; oId "CUFF.21523.16"; tss\_id "TSS14556";  
chr12 Cufflinks exon 77009089 77009237 . + . gene\_id "XLOC\_011455"; transcript\_id "TCONS\_00019524";  
exon\_number "4"; oId "CUFF.21523.16"; tss\_id "TSS14556";  
chr12 Cufflinks exon 76953663 76954013 . + . gene\_id "XLOC\_011455"; transcript\_id "TCONS\_00019526";  
exon\_number "1"; oId "CUFF.21523.18"; tss\_id "TSS14556";  
chr12 Cufflinks exon 76956075 76956138 . + . gene\_id "XLOC\_011455"; transcript\_id "TCONS\_00019526";  
exon\_number "2"; oId "CUFF.21523.18"; tss\_id "TSS14556";  
chr12 Cufflinks exon 76964491 76964546 . + . gene\_id "XLOC\_011455"; transcript\_id "TCONS\_00019526";  
exon\_number "3"; oId "CUFF.21523.18"; tss\_id "TSS14556";  
chr12 Cufflinks exon 77026701 77026836 . + . gene\_id "XLOC\_011455"; transcript\_id "TCONS\_00019526";  
exon\_number "4"; oId "CUFF.21523.18"; tss\_id "TSS14556";  
chr12 Cufflinks exon 77048943 77049072 . + . gene\_id "XLOC\_011455"; transcript\_id "TCONS\_00019526";  
exon\_number "5"; oId "CUFF.21523.18"; tss\_id "TSS14556";  
chr12 Cufflinks exon 76953663 76954013 . + . gene\_id "XLOC\_011455"; transcript\_id "TCONS\_00019525";  
exon\_number "1"; oId "CUFF.21523.17"; tss\_id "TSS14556";  
chr12 Cufflinks exon 76956075 76956138 . + . gene\_id "XLOC\_011455"; transcript\_id "TCONS\_00019525";  
exon\_number "2"; oId "CUFF.21523.17"; tss\_id "TSS14556";  
chr12 Cufflinks exon 77026701 77026836 . + . gene\_id "XLOC\_011455"; transcript\_id "TCONS\_00019525";  
exon\_number "3"; oId "CUFF.21523.17"; tss\_id "TSS14556";  
chr12 Cufflinks exon 77048943 77049072 . + . gene\_id "XLOC\_011455"; transcript\_id "TCONS\_00019525";  
exon\_number "4"; oId "CUFF.21523.17"; tss\_id "TSS14556";  
chr12 Cufflinks exon 76953663 76954013 . + . gene\_id "XLOC\_011455"; transcript\_id "TCONS\_00019527";  
exon\_number "1"; oId "CUFF.21523.19"; tss\_id "TSS14556";  
chr12 Cufflinks exon 76956075 76956138 . + . gene\_id "XLOC\_011455"; transcript\_id "TCONS\_00019527";  
exon\_number "2"; oId "CUFF.21523.19"; tss\_id "TSS14556";  
chr12 Cufflinks exon 76964491 76964546 . + . gene\_id "XLOC\_011455"; transcript\_id "TCONS\_00019527";  
exon\_number "3"; oId "CUFF.21523.19"; tss\_id "TSS14556";  
chr12 Cufflinks exon 77026706 77026836 . + . gene\_id "XLOC\_011455"; transcript\_id "TCONS\_00019527";  
exon\_number "4"; oId "CUFF.21523.19"; tss\_id "TSS14556";  
chr12 Cufflinks exon 77111687 77111969 . + . gene\_id "XLOC\_011455"; transcript\_id "TCONS\_00019527";  
exon\_number "5"; oId "CUFF.21523.19"; tss\_id "TSS14556";  
chr12 Cufflinks exon 85711775 85711893 . + . gene\_id "XLOC\_011476"; transcript\_id "TCONS\_00019564";

exon\_number "1"; oId "CUFF.21599.2"; tss\_id "TSS14581";  
chr12 Cufflinks exon 85736250 85736497 . + . gene\_id "XLOC\_011476"; transcript\_id "TCONS\_00019564";  
exon\_number "2"; oId "CUFF.21599.2"; tss\_id "TSS14581";  
chr12 Cufflinks exon 85793271 85793388 . + . gene\_id "XLOC\_011476"; transcript\_id "TCONS\_00019564";  
exon\_number "3"; oId "CUFF.21599.2"; tss\_id "TSS14581";  
chr12 Cufflinks exon 85817896 85817982 . + . gene\_id "XLOC\_011476"; transcript\_id "TCONS\_00019564";  
exon\_number "4"; oId "CUFF.21599.2"; tss\_id "TSS14581";  
chr12 Cufflinks exon 85879433 85879871 . + . gene\_id "XLOC\_011476"; transcript\_id "TCONS\_00019564";  
exon\_number "5"; oId "CUFF.21599.2"; tss\_id "TSS14581";  
chr12 Cufflinks exon 97360965 97361013 . + . gene\_id "XLOC\_011569"; transcript\_id "TCONS\_00019703";  
exon\_number "1"; oId "CUFF.21993.2"; tss\_id "TSS14690";  
chr12 Cufflinks exon 97363852 97365588 . + . gene\_id "XLOC\_011569"; transcript\_id "TCONS\_00019703";  
exon\_number "2"; oId "CUFF.21993.2"; tss\_id "TSS14690";  
chr12 Cufflinks exon 102137436 102137807 . + . gene\_id "XLOC\_011594"; transcript\_id "TCONS\_00019752";  
exon\_number "1"; oId "CUFF.22093.2"; tss\_id "TSS14723";  
chr12 Cufflinks exon 102141809 102142687 . + . gene\_id "XLOC\_011594"; transcript\_id "TCONS\_00019752";  
exon\_number "2"; oId "CUFF.22093.2"; tss\_id "TSS14723";  
chr12 Cufflinks exon 109029625 109029822 . + . gene\_id "XLOC\_011683"; transcript\_id "TCONS\_00019878";  
exon\_number "1"; oId "CUFF.22362.2"; tss\_id "TSS14828";  
chr12 Cufflinks exon 109030171 109030542 . + . gene\_id "XLOC\_011683"; transcript\_id "TCONS\_00019878";  
exon\_number "2"; oId "CUFF.22362.2"; tss\_id "TSS14828";  
chr12 Cufflinks exon 116971227 116971421 . + . gene\_id "XLOC\_011748"; transcript\_id "TCONS\_00019998";  
exon\_number "1"; oId "CUFF.22638.2"; tss\_id "TSS14915";  
chr12 Cufflinks exon 116971771 116974016 . + . gene\_id "XLOC\_011748"; transcript\_id "TCONS\_00019998";  
exon\_number "2"; oId "CUFF.22638.2"; tss\_id "TSS14915";  
chr12 Cufflinks exon 116974158 116975014 . + . gene\_id "XLOC\_011748"; transcript\_id "TCONS\_00019998";  
exon\_number "3"; oId "CUFF.22638.2"; tss\_id "TSS14915";  
chr12 Cufflinks exon 116971227 116971267 . + . gene\_id "XLOC\_011748"; transcript\_id "TCONS\_00019997";  
exon\_number "1"; oId "CUFF.22638.1"; tss\_id "TSS14915";  
chr12 Cufflinks exon 116971771 116974016 . + . gene\_id "XLOC\_011748"; transcript\_id "TCONS\_00019997";  
exon\_number "2"; oId "CUFF.22638.1"; tss\_id "TSS14915";  
chr12 Cufflinks exon 116974158 116975014 . + . gene\_id "XLOC\_011748"; transcript\_id "TCONS\_00019997";  
exon\_number "3"; oId "CUFF.22638.1"; tss\_id "TSS14915";  
chr12 Cufflinks exon 116971240 116971421 . + . gene\_id "XLOC\_011748"; transcript\_id "TCONS\_00019999";  
exon\_number "1"; oId "CUFF.22638.3"; tss\_id "TSS14915";  
chr12 Cufflinks exon 116973925 116974016 . + . gene\_id "XLOC\_011748"; transcript\_id "TCONS\_00019999";  
exon\_number "2"; oId "CUFF.22638.3"; tss\_id "TSS14915";  
chr12 Cufflinks exon 116974158 116975014 . + . gene\_id "XLOC\_011748"; transcript\_id "TCONS\_00019999";  
exon\_number "3"; oId "CUFF.22638.3"; tss\_id "TSS14915";  
chr12 Cufflinks exon 120426810 120427153 . + . gene\_id "XLOC\_011769"; transcript\_id "TCONS\_00020031";  
exon\_number "1"; oId "CUFF.22728.1"; tss\_id "TSS14939";  
chr12 Cufflinks exon 120597848 120597857 . + . gene\_id "XLOC\_011769"; transcript\_id "TCONS\_00020031";  
exon\_number "2"; oId "CUFF.22728.1"; tss\_id "TSS14939";



|                                                         |      |           |           |   |   |   |                                                                             |
|---------------------------------------------------------|------|-----------|-----------|---|---|---|-----------------------------------------------------------------------------|
| chr12 Cufflinks                                         | exon | 120639094 | 120639229 | . | + | . | gene_id "XLOC_011770"; transcript_id "TCONS_00020037";                      |
| exon_number "1"; oId "CUFF.22733.1"; tss_id "TSS14943"; |      |           |           |   |   |   |                                                                             |
| chr12 Cufflinks                                         | exon | 120644348 | 120644424 | . | + | . | gene_id "XLOC_011770"; transcript_id "TCONS_00020037";                      |
| exon_number "2"; oId "CUFF.22733.1"; tss_id "TSS14943"; |      |           |           |   |   |   |                                                                             |
| chr12 Cufflinks                                         | exon | 120647642 | 120647737 | . | + | . | gene_id "XLOC_011770"; transcript_id "TCONS_00020037";                      |
| exon_number "3"; oId "CUFF.22733.1"; tss_id "TSS14943"; |      |           |           |   |   |   |                                                                             |
| chr12 Cufflinks                                         | exon | 120650178 | 120650631 | . | + | . | gene_id "XLOC_011770"; transcript_id "TCONS_00020037";                      |
| exon_number "4"; oId "CUFF.22733.1"; tss_id "TSS14943"; |      |           |           |   |   |   |                                                                             |
| chr12 Cufflinks                                         | exon | 123848478 | 123848554 | . | + | . | gene_id "XLOC_011832"; transcript_id "TCONS_00020161";                      |
| exon_number "1"; oId "CUFF.23023.2"; tss_id "TSS15019"; |      |           |           |   |   |   |                                                                             |
| chr12 Cufflinks                                         | exon | 123848742 | 123849140 | . | + | . | gene_id "XLOC_011832"; transcript_id "TCONS_00020161";                      |
| exon_number "2"; oId "CUFF.23023.2"; tss_id "TSS15019"; |      |           |           |   |   |   |                                                                             |
| chr12 Cufflinks                                         | exon | 123849537 | 123849662 | . | + | . | gene_id "XLOC_011832"; transcript_id "TCONS_00020161";                      |
| exon_number "3"; oId "CUFF.23023.2"; tss_id "TSS15019"; |      |           |           |   |   |   |                                                                             |
| chr12 Cufflinks                                         | exon | 123850072 | 123850310 | . | + | . | gene_id "XLOC_011832"; transcript_id "TCONS_00020161";                      |
| exon_number "4"; oId "CUFF.23023.2"; tss_id "TSS15019"; |      |           |           |   |   |   |                                                                             |
| chr12 Cufflinks                                         | exon | 123848478 | 123848554 | . | + | . | gene_id "XLOC_011832"; transcript_id "TCONS_00020160";                      |
| exon_number "1"; oId "CUFF.23023.1"; tss_id "TSS15019"; |      |           |           |   |   |   |                                                                             |
| chr12 Cufflinks                                         | exon | 123849537 | 123849662 | . | + | . | gene_id "XLOC_011832"; transcript_id "TCONS_00020160";                      |
| exon_number "2"; oId "CUFF.23023.1"; tss_id "TSS15019"; |      |           |           |   |   |   |                                                                             |
| chr12 Cufflinks                                         | exon | 123850072 | 123850310 | . | + | . | gene_id "XLOC_011832"; transcript_id "TCONS_00020160";                      |
| exon_number "3"; oId "CUFF.23023.1"; tss_id "TSS15019"; |      |           |           |   |   |   |                                                                             |
| chr12 Cufflinks                                         | exon | 131706438 | 131707961 | . | + | . | gene_id "XLOC_011878"; transcript_id "TCONS_00020253";                      |
| exon_number "1"; oId "CUFF.23311.1"; tss_id "TSS15083"; |      |           |           |   |   |   |                                                                             |
| chr12 Cufflinks                                         | exon | 131708134 | 131708896 | . | + | . | gene_id "XLOC_011878"; transcript_id "TCONS_00020253";                      |
| exon_number "2"; oId "CUFF.23311.1"; tss_id "TSS15083"; |      |           |           |   |   |   |                                                                             |
| chr12 Cufflinks                                         | exon | 132670927 | 132674878 | . | + | . | gene_id "XLOC_011902"; transcript_id "TCONS_00020299";                      |
| exon_number "1"; oId "CUFF.23371.1"; tss_id "TSS15114"; |      |           |           |   |   |   |                                                                             |
| chr12 Cufflinks                                         | exon | 132675273 | 132676073 | . | + | . | gene_id "XLOC_011902"; transcript_id "TCONS_00020299";                      |
| exon_number "2"; oId "CUFF.23371.1"; tss_id "TSS15114"; |      |           |           |   |   |   |                                                                             |
| chr12 Cufflinks                                         | exon | 2793829   | 2794770   | . | - | . | gene_id "XLOC_011957"; transcript_id "TCONS_00020418"; exon_number "1"; oId |
| "CUFF.18413.7"; tss_id "TSS15190";                      |      |           |           |   |   |   |                                                                             |
| chr12 Cufflinks                                         | exon | 2851109   | 2851304   | . | - | . | gene_id "XLOC_011957"; transcript_id "TCONS_00020418"; exon_number "2"; oId |
| "CUFF.18413.7"; tss_id "TSS15190";                      |      |           |           |   |   |   |                                                                             |
| chr12 Cufflinks                                         | exon | 2901185   | 2902683   | . | - | . | gene_id "XLOC_011970"; transcript_id "TCONS_00020431"; exon_number "1"; oId |
| "CUFF.18441.2"; tss_id "TSS15204";                      |      |           |           |   |   |   |                                                                             |
| chr12 Cufflinks                                         | exon | 2903163   | 2903951   | . | - | . | gene_id "XLOC_011970"; transcript_id "TCONS_00020431"; exon_number "2"; oId |
| "CUFF.18441.2"; tss_id "TSS15204";                      |      |           |           |   |   |   |                                                                             |
| chr12 Cufflinks                                         | exon | 4904095   | 4906002   | . | - | . | gene_id "XLOC_011992"; transcript_id "TCONS_00020473"; exon_number "1"; oId |
| "CUFF.18531.1"; tss_id "TSS15230";                      |      |           |           |   |   |   |                                                                             |
| chr12 Cufflinks                                         | exon | 4906397   | 4909169   | . | - | . | gene_id "XLOC_011992"; transcript_id "TCONS_00020473"; exon_number "2"; oId |
| "CUFF.18531.1"; tss_id "TSS15230";                      |      |           |           |   |   |   |                                                                             |
| chr12 Cufflinks                                         | exon | 4904095   | 4906002   | . | - | . | gene_id "XLOC_011992"; transcript_id "TCONS_00020475"; exon_number "1"; oId |

"CUFF.18531.3"; tss\_id "TSS15231";  
chr12 Cufflinks exon 4906397 4906739 . - . gene\_id "XLOC\_011992"; transcript\_id "TCONS\_00020475"; exon\_number "2"; oId  
"CUFF.18531.3"; tss\_id "TSS15231";  
chr12 Cufflinks exon 4913058 4913441 . - . gene\_id "XLOC\_011992"; transcript\_id "TCONS\_00020475"; exon\_number "3"; oId  
"CUFF.18531.3"; tss\_id "TSS15231";  
chr12 Cufflinks exon 4911623 4921858 . - . gene\_id "XLOC\_011992"; transcript\_id "TCONS\_00020476"; exon\_number "1"; oId  
"CUFF.18531.6"; tss\_id "TSS15232";  
chr12 Cufflinks exon 4922722 4922812 . - . gene\_id "XLOC\_011992"; transcript\_id "TCONS\_00020476"; exon\_number "2"; oId  
"CUFF.18531.6"; tss\_id "TSS15232";  
chr12 Cufflinks exon 4923487 4923584 . - . gene\_id "XLOC\_011992"; transcript\_id "TCONS\_00020476"; exon\_number "3"; oId  
"CUFF.18531.6"; tss\_id "TSS15232";  
chr12 Cufflinks exon 4911623 4920501 . - . gene\_id "XLOC\_011992"; transcript\_id "TCONS\_00020477"; exon\_number "1"; oId  
"CUFF.18531.12"; tss\_id "TSS15232";  
chr12 Cufflinks exon 4922722 4922812 . - . gene\_id "XLOC\_011992"; transcript\_id "TCONS\_00020477"; exon\_number "2"; oId  
"CUFF.18531.12"; tss\_id "TSS15232";  
chr12 Cufflinks exon 4923487 4923675 . - . gene\_id "XLOC\_011992"; transcript\_id "TCONS\_00020477"; exon\_number "3"; oId  
"CUFF.18531.12"; tss\_id "TSS15232";  
chr12 Cufflinks exon 4911623 4920501 . - . gene\_id "XLOC\_011992"; transcript\_id "TCONS\_00020478"; exon\_number "1"; oId  
"CUFF.18531.18"; tss\_id "TSS15233";  
chr12 Cufflinks exon 4922722 4922812 . - . gene\_id "XLOC\_011992"; transcript\_id "TCONS\_00020478"; exon\_number "2"; oId  
"CUFF.18531.18"; tss\_id "TSS15233";  
chr12 Cufflinks exon 4926327 4926494 . - . gene\_id "XLOC\_011992"; transcript\_id "TCONS\_00020478"; exon\_number "3"; oId  
"CUFF.18531.18"; tss\_id "TSS15233";  
chr12 Cufflinks exon 4911623 4922812 . - . gene\_id "XLOC\_011992"; transcript\_id "TCONS\_00020479"; exon\_number "1"; oId  
"CUFF.18531.16"; tss\_id "TSS15234";  
chr12 Cufflinks exon 4926327 4926601 . - . gene\_id "XLOC\_011992"; transcript\_id "TCONS\_00020479"; exon\_number "2"; oId  
"CUFF.18531.16"; tss\_id "TSS15234";  
chr12 Cufflinks exon 4911623 4917874 . - . gene\_id "XLOC\_011992"; transcript\_id "TCONS\_00020480"; exon\_number "1"; oId  
"CUFF.18531.5"; tss\_id "TSS15235";  
chr12 Cufflinks exon 4922722 4922812 . - . gene\_id "XLOC\_011992"; transcript\_id "TCONS\_00020480"; exon\_number "2"; oId  
"CUFF.18531.5"; tss\_id "TSS15235";  
chr12 Cufflinks exon 4928534 4928593 . - . gene\_id "XLOC\_011992"; transcript\_id "TCONS\_00020480"; exon\_number "3"; oId  
"CUFF.18531.5"; tss\_id "TSS15235";  
chr12 Cufflinks exon 4911623 4922812 . - . gene\_id "XLOC\_011992"; transcript\_id "TCONS\_00020481"; exon\_number "1"; oId  
"CUFF.18531.17"; tss\_id "TSS15236";  
chr12 Cufflinks exon 4933737 4936176 . - . gene\_id "XLOC\_011992"; transcript\_id "TCONS\_00020481"; exon\_number "2"; oId  
"CUFF.18531.17"; tss\_id "TSS15236";  
chr12 Cufflinks exon 4911623 4916034 . - . gene\_id "XLOC\_011992"; transcript\_id "TCONS\_00020482"; exon\_number "1"; oId  
"CUFF.18531.15"; tss\_id "TSS15236";  
chr12 Cufflinks exon 4917361 4921858 . - . gene\_id "XLOC\_011992"; transcript\_id "TCONS\_00020482"; exon\_number "2"; oId  
"CUFF.18531.15"; tss\_id "TSS15236";  
chr12 Cufflinks exon 4922722 4922812 . - . gene\_id "XLOC\_011992"; transcript\_id "TCONS\_00020482"; exon\_number "3"; oId  
"CUFF.18531.15"; tss\_id "TSS15236";

|       |                       |         |   |   |   |                                                                                                                 |
|-------|-----------------------|---------|---|---|---|-----------------------------------------------------------------------------------------------------------------|
| chr12 | Cufflinks exon4933737 | 4936181 | . | - | . | gene_id "XLOC_011992"; transcript_id "TCONS_00020482"; exon_number "4"; oId "CUFF.18531.15"; tss_id "TSS15236"; |
| chr12 | Cufflinks exon4911623 | 4921858 | . | - | . | gene_id "XLOC_011992"; transcript_id "TCONS_00020483"; exon_number "1"; oId "CUFF.18531.14"; tss_id "TSS15236"; |
| chr12 | Cufflinks exon4922722 | 4922812 | . | - | . | gene_id "XLOC_011992"; transcript_id "TCONS_00020483"; exon_number "2"; oId "CUFF.18531.14"; tss_id "TSS15236"; |
| chr12 | Cufflinks exon4933737 | 4936217 | . | - | . | gene_id "XLOC_011992"; transcript_id "TCONS_00020483"; exon_number "3"; oId "CUFF.18531.14"; tss_id "TSS15236"; |
| chr12 | Cufflinks exon4911623 | 4922812 | . | - | . | gene_id "XLOC_011992"; transcript_id "TCONS_00020485"; exon_number "1"; oId "CUFF.18531.7"; tss_id "TSS15237";  |
| chr12 | Cufflinks exon4933737 | 4933856 | . | - | . | gene_id "XLOC_011992"; transcript_id "TCONS_00020485"; exon_number "2"; oId "CUFF.18531.7"; tss_id "TSS15237";  |
| chr12 | Cufflinks exon4938463 | 4940029 | . | - | . | gene_id "XLOC_011992"; transcript_id "TCONS_00020485"; exon_number "3"; oId "CUFF.18531.7"; tss_id "TSS15237";  |
| chr12 | Cufflinks exon4911623 | 4922812 | . | - | . | gene_id "XLOC_011992"; transcript_id "TCONS_00020484"; exon_number "1"; oId "CUFF.18531.13"; tss_id "TSS15237"; |
| chr12 | Cufflinks exon4939596 | 4940029 | . | - | . | gene_id "XLOC_011992"; transcript_id "TCONS_00020484"; exon_number "2"; oId "CUFF.18531.13"; tss_id "TSS15237"; |
| chr12 | Cufflinks exon4911623 | 4922812 | . | - | . | gene_id "XLOC_011992"; transcript_id "TCONS_00020486"; exon_number "1"; oId "CUFF.18531.11"; tss_id "TSS15237"; |
| chr12 | Cufflinks exon4938463 | 4940040 | . | - | . | gene_id "XLOC_011992"; transcript_id "TCONS_00020486"; exon_number "2"; oId "CUFF.18531.11"; tss_id "TSS15237"; |
| chr12 | Cufflinks exon4911623 | 4920501 | . | - | . | gene_id "XLOC_011992"; transcript_id "TCONS_00020489"; exon_number "1"; oId "CUFF.18531.9"; tss_id "TSS15237";  |
| chr12 | Cufflinks exon4922722 | 4922812 | . | - | . | gene_id "XLOC_011992"; transcript_id "TCONS_00020489"; exon_number "2"; oId "CUFF.18531.9"; tss_id "TSS15237";  |
| chr12 | Cufflinks exon4939596 | 4940100 | . | - | . | gene_id "XLOC_011992"; transcript_id "TCONS_00020489"; exon_number "3"; oId "CUFF.18531.9"; tss_id "TSS15237";  |
| chr12 | Cufflinks exon4911623 | 4921858 | . | - | . | gene_id "XLOC_011992"; transcript_id "TCONS_00020488"; exon_number "1"; oId "CUFF.18531.8"; tss_id "TSS15237";  |
| chr12 | Cufflinks exon4922722 | 4922812 | . | - | . | gene_id "XLOC_011992"; transcript_id "TCONS_00020488"; exon_number "2"; oId "CUFF.18531.8"; tss_id "TSS15237";  |
| chr12 | Cufflinks exon4933737 | 4933856 | . | - | . | gene_id "XLOC_011992"; transcript_id "TCONS_00020488"; exon_number "3"; oId "CUFF.18531.8"; tss_id "TSS15237";  |
| chr12 | Cufflinks exon4939596 | 4940100 | . | - | . | gene_id "XLOC_011992"; transcript_id "TCONS_00020488"; exon_number "4"; oId "CUFF.18531.8"; tss_id "TSS15237";  |
| chr12 | Cufflinks exon4911623 | 4921858 | . | - | . | gene_id "XLOC_011992"; transcript_id "TCONS_00020487"; exon_number "1"; oId "CUFF.18531.10"; tss_id "TSS15237"; |
| chr12 | Cufflinks exon4922722 | 4922812 | . | - | . | gene_id "XLOC_011992"; transcript_id "TCONS_00020487"; exon_number "2"; oId "CUFF.18531.10"; tss_id "TSS15237"; |
| chr12 | Cufflinks exon4933737 | 4933856 | . | - | . | gene_id "XLOC_011992"; transcript_id "TCONS_00020487"; exon_number "3"; oId "CUFF.18531.10"; tss_id "TSS15237"; |
| chr12 | Cufflinks exon4938463 | 4940100 | . | - | . | gene_id "XLOC_011992"; transcript_id "TCONS_00020487"; exon_number "4"; oId "CUFF.18531.10"; tss_id "TSS15237"; |

"CUFF.18531.10"; tss\_id "TSS15237";  
chr12 Cufflinks exon4911623 4922812 . - . gene\_id "XLOC\_011992"; transcript\_id "TCONS\_00020490"; exon\_number "1"; oId  
"CUFF.18531.4"; tss\_id "TSS15237";  
chr12 Cufflinks exon4933737 4933856 . - . gene\_id "XLOC\_011992"; transcript\_id "TCONS\_00020490"; exon\_number "2"; oId  
"CUFF.18531.4"; tss\_id "TSS15237";  
chr12 Cufflinks exon4939596 4940112 . - . gene\_id "XLOC\_011992"; transcript\_id "TCONS\_00020490"; exon\_number "3"; oId  
"CUFF.18531.4"; tss\_id "TSS15237";  
chr12 Cufflinks exon4911623 4916034 . - . gene\_id "XLOC\_011992"; transcript\_id "TCONS\_00020491"; exon\_number "1"; oId  
"CUFF.18531.19"; tss\_id "TSS15237";  
chr12 Cufflinks exon4922722 4937658 . - . gene\_id "XLOC\_011992"; transcript\_id "TCONS\_00020491"; exon\_number "2"; oId  
"CUFF.18531.19"; tss\_id "TSS15237";  
chr12 Cufflinks exon4938463 4940210 . - . gene\_id "XLOC\_011992"; transcript\_id "TCONS\_00020491"; exon\_number "3"; oId  
"CUFF.18531.19"; tss\_id "TSS15237";  
chr12 Cufflinks exon6548167 6548842 . - . gene\_id "XLOC\_012004"; transcript\_id "TCONS\_00020504"; exon\_number "1"; oId  
"CUFF.18558.1"; tss\_id "TSS15250";  
chr12 Cufflinks exon6552712 6552883 . - . gene\_id "XLOC\_012004"; transcript\_id "TCONS\_00020504"; exon\_number "2"; oId  
"CUFF.18558.1"; tss\_id "TSS15250";  
chr12 Cufflinks exon6556127 6556253 . - . gene\_id "XLOC\_012004"; transcript\_id "TCONS\_00020504"; exon\_number "3"; oId  
"CUFF.18558.1"; tss\_id "TSS15250";  
chr12 Cufflinks exon6557203 6557316 . - . gene\_id "XLOC\_012004"; transcript\_id "TCONS\_00020504"; exon\_number "4"; oId  
"CUFF.18558.1"; tss\_id "TSS15250";  
chr12 Cufflinks exon6557806 6557903 . - . gene\_id "XLOC\_012004"; transcript\_id "TCONS\_00020504"; exon\_number "5"; oId  
"CUFF.18558.1"; tss\_id "TSS15250";  
chr12 Cufflinks exon6559507 6560683 . - . gene\_id "XLOC\_012004"; transcript\_id "TCONS\_00020504"; exon\_number "6"; oId  
"CUFF.18558.1"; tss\_id "TSS15250";  
chr12 Cufflinks exon7756887 7757614 . - . gene\_id "XLOC\_012041"; transcript\_id "TCONS\_00020561"; exon\_number "1"; oId  
"CUFF.18682.2"; tss\_id "TSS15296";  
chr12 Cufflinks exon7762720 7762735 . - . gene\_id "XLOC\_012041"; transcript\_id "TCONS\_00020561"; exon\_number "2"; oId  
"CUFF.18682.2"; tss\_id "TSS15296";  
chr12 Cufflinks exon8116215 8117604 . - . gene\_id "XLOC\_012049"; transcript\_id "TCONS\_00020570"; exon\_number "1"; oId  
"CUFF.18701.2"; tss\_id "TSS15305";  
chr12 Cufflinks exon8122644 8123642 . - . gene\_id "XLOC\_012049"; transcript\_id "TCONS\_00020570"; exon\_number "2"; oId  
"CUFF.18701.2"; tss\_id "TSS15305";  
chr12 Cufflinks exon14903701 14903717 . - . gene\_id "XLOC\_012210"; transcript\_id "TCONS\_00020797"; exon\_number  
"1"; oId "CUFF.19387.5"; tss\_id "TSS15495";  
chr12 Cufflinks exon14921873 14921943 . - . gene\_id "XLOC\_012210"; transcript\_id "TCONS\_00020797"; exon\_number  
"2"; oId "CUFF.19387.5"; tss\_id "TSS15495";  
chr12 Cufflinks exon14922834 14923519 . - . gene\_id "XLOC\_012210"; transcript\_id "TCONS\_00020797"; exon\_number  
"3"; oId "CUFF.19387.5"; tss\_id "TSS15495";  
chr12 Cufflinks exon26107588 26108174 . - . gene\_id "XLOC\_012349"; transcript\_id "TCONS\_00020971"; exon\_number  
"1"; oId "CUFF.19652.7"; tss\_id "TSS15654";  
chr12 Cufflinks exon26109160 26109280 . - . gene\_id "XLOC\_012349"; transcript\_id "TCONS\_00020971"; exon\_number  
"2"; oId "CUFF.19652.7"; tss\_id "TSS15654";

|       |                |          |          |   |   |   |                                                                                                                |
|-------|----------------|----------|----------|---|---|---|----------------------------------------------------------------------------------------------------------------|
| chr12 | Cufflinks exon | 26109572 | 26109694 | . | - | . | gene_id "XLOC_012349"; transcript_id "TCONS_00020971"; exon_number "3"; oId "CUFF.19652.7"; tss_id "TSS15654"; |
| chr12 | Cufflinks exon | 26110386 | 26110518 | . | - | . | gene_id "XLOC_012349"; transcript_id "TCONS_00020971"; exon_number "4"; oId "CUFF.19652.7"; tss_id "TSS15654"; |
| chr12 | Cufflinks exon | 26107588 | 26108174 | . | - | . | gene_id "XLOC_012349"; transcript_id "TCONS_00020972"; exon_number "1"; oId "CUFF.19652.6"; tss_id "TSS15655"; |
| chr12 | Cufflinks exon | 26109160 | 26109280 | . | - | . | gene_id "XLOC_012349"; transcript_id "TCONS_00020972"; exon_number "2"; oId "CUFF.19652.6"; tss_id "TSS15655"; |
| chr12 | Cufflinks exon | 26109572 | 26109697 | . | - | . | gene_id "XLOC_012349"; transcript_id "TCONS_00020972"; exon_number "3"; oId "CUFF.19652.6"; tss_id "TSS15655"; |
| chr12 | Cufflinks exon | 26112259 | 26112375 | . | - | . | gene_id "XLOC_012349"; transcript_id "TCONS_00020972"; exon_number "4"; oId "CUFF.19652.6"; tss_id "TSS15655"; |
| chr12 | Cufflinks exon | 27849242 | 27849911 | . | - | . | gene_id "XLOC_012363"; transcript_id "TCONS_00020997"; exon_number "1"; oId "CUFF.19761.1"; tss_id "TSS15675"; |
| chr12 | Cufflinks exon | 27856394 | 27856553 | . | - | . | gene_id "XLOC_012363"; transcript_id "TCONS_00020997"; exon_number "2"; oId "CUFF.19761.1"; tss_id "TSS15675"; |
| chr12 | Cufflinks exon | 27857671 | 27857859 | . | - | . | gene_id "XLOC_012363"; transcript_id "TCONS_00020997"; exon_number "3"; oId "CUFF.19761.1"; tss_id "TSS15675"; |
| chr12 | Cufflinks exon | 49325114 | 49325736 | . | - | . | gene_id "XLOC_012505"; transcript_id "TCONS_00021257"; exon_number "1"; oId "CUFF.20274.1"; tss_id "TSS15866"; |
| chr12 | Cufflinks exon | 49327407 | 49328797 | . | - | . | gene_id "XLOC_012505"; transcript_id "TCONS_00021257"; exon_number "2"; oId "CUFF.20274.1"; tss_id "TSS15866"; |
| chr12 | Cufflinks exon | 54356092 | 54357908 | . | - | . | gene_id "XLOC_012611"; transcript_id "TCONS_00021455"; exon_number "1"; oId "CUFF.20645.2"; tss_id "TSS16021"; |
| chr12 | Cufflinks exon | 54358015 | 54358067 | . | - | . | gene_id "XLOC_012611"; transcript_id "TCONS_00021455"; exon_number "2"; oId "CUFF.20645.2"; tss_id "TSS16021"; |
| chr12 | Cufflinks exon | 54359748 | 54359871 | . | - | . | gene_id "XLOC_012611"; transcript_id "TCONS_00021455"; exon_number "3"; oId "CUFF.20645.2"; tss_id "TSS16021"; |
| chr12 | Cufflinks exon | 54360060 | 54360161 | . | - | . | gene_id "XLOC_012611"; transcript_id "TCONS_00021455"; exon_number "4"; oId "CUFF.20645.2"; tss_id "TSS16021"; |
| chr12 | Cufflinks exon | 54360392 | 54360646 | . | - | . | gene_id "XLOC_012611"; transcript_id "TCONS_00021455"; exon_number "5"; oId "CUFF.20645.2"; tss_id "TSS16021"; |
| chr12 | Cufflinks exon | 54356092 | 54357908 | . | - | . | gene_id "XLOC_012611"; transcript_id "TCONS_00021454"; exon_number "1"; oId "CUFF.20645.1"; tss_id "TSS16021"; |
| chr12 | Cufflinks exon | 54359748 | 54359843 | . | - | . | gene_id "XLOC_012611"; transcript_id "TCONS_00021454"; exon_number "2"; oId "CUFF.20645.1"; tss_id "TSS16021"; |
| chr12 | Cufflinks exon | 54360060 | 54360646 | . | - | . | gene_id "XLOC_012611"; transcript_id "TCONS_00021454"; exon_number "3"; oId "CUFF.20645.1"; tss_id "TSS16021"; |
| chr12 | Cufflinks exon | 54356092 | 54357908 | . | - | . | gene_id "XLOC_012611"; transcript_id "TCONS_00021456"; exon_number "1"; oId "CUFF.20645.3"; tss_id "TSS16022"; |
| chr12 | Cufflinks exon | 54359748 | 54359867 | . | - | . | gene_id "XLOC_012611"; transcript_id "TCONS_00021456"; exon_number "2"; oId "CUFF.20645.3"; tss_id "TSS16022"; |
| chr12 | Cufflinks exon | 54360060 | 54360161 | . | - | . | gene_id "XLOC_012611"; transcript_id "TCONS_00021456"; exon_number "3"; oId "CUFF.20645.3"; tss_id "TSS16022"; |

|                                             |                        |          |   |   |                                                                    |
|---------------------------------------------|------------------------|----------|---|---|--------------------------------------------------------------------|
| "3"; oId "CUFF.20645.3"; tss_id "TSS16022"; |                        |          |   |   |                                                                    |
| chr12                                       | Cufflinks exon54362401 | 54362698 | . | - | .                                                                  |
|                                             |                        |          |   |   | gene_id "XLOC_012611"; transcript_id "TCONS_00021456"; exon_number |
| "4"; oId "CUFF.20645.3"; tss_id "TSS16022"; |                        |          |   |   |                                                                    |
| chr12                                       | Cufflinks exon54356092 | 54357908 | . | - | .                                                                  |
|                                             |                        |          |   |   | gene_id "XLOC_012611"; transcript_id "TCONS_00021457"; exon_number |
| "1"; oId "CUFF.20645.4"; tss_id "TSS16023"; |                        |          |   |   |                                                                    |
| chr12                                       | Cufflinks exon54359748 | 54359871 | . | - | .                                                                  |
|                                             |                        |          |   |   | gene_id "XLOC_012611"; transcript_id "TCONS_00021457"; exon_number |
| "2"; oId "CUFF.20645.4"; tss_id "TSS16023"; |                        |          |   |   |                                                                    |
| chr12                                       | Cufflinks exon54360060 | 54360161 | . | - | .                                                                  |
|                                             |                        |          |   |   | gene_id "XLOC_012611"; transcript_id "TCONS_00021457"; exon_number |
| "3"; oId "CUFF.20645.4"; tss_id "TSS16023"; |                        |          |   |   |                                                                    |
| chr12                                       | Cufflinks exon54361053 | 54361178 | . | - | .                                                                  |
|                                             |                        |          |   |   | gene_id "XLOC_012611"; transcript_id "TCONS_00021457"; exon_number |
| "4"; oId "CUFF.20645.4"; tss_id "TSS16023"; |                        |          |   |   |                                                                    |
| chr12                                       | Cufflinks exon54362401 | 54362540 | . | - | .                                                                  |
|                                             |                        |          |   |   | gene_id "XLOC_012611"; transcript_id "TCONS_00021457"; exon_number |
| "5"; oId "CUFF.20645.4"; tss_id "TSS16023"; |                        |          |   |   |                                                                    |
| chr12                                       | Cufflinks exon54368682 | 54368740 | . | - | .                                                                  |
|                                             |                        |          |   |   | gene_id "XLOC_012611"; transcript_id "TCONS_00021457"; exon_number |
| "6"; oId "CUFF.20645.4"; tss_id "TSS16023"; |                        |          |   |   |                                                                    |
| chr12                                       | Cufflinks exon57851247 | 57853346 | . | - | .                                                                  |
|                                             |                        |          |   |   | gene_id "XLOC_012714"; transcript_id "TCONS_00021654"; exon_number |
| "1"; oId "CUFF.20957.3"; tss_id "TSS16165"; |                        |          |   |   |                                                                    |
| chr12                                       | Cufflinks exon57856528 | 57856570 | . | - | .                                                                  |
|                                             |                        |          |   |   | gene_id "XLOC_012714"; transcript_id "TCONS_00021654"; exon_number |
| "2"; oId "CUFF.20957.3"; tss_id "TSS16165"; |                        |          |   |   |                                                                    |
| chr12                                       | Cufflinks exon57851247 | 57851526 | . | - | .                                                                  |
|                                             |                        |          |   |   | gene_id "XLOC_012714"; transcript_id "TCONS_00021653"; exon_number |
| "1"; oId "CUFF.20957.1"; tss_id "TSS16165"; |                        |          |   |   |                                                                    |
| chr12                                       | Cufflinks exon57852664 | 57853346 | . | - | .                                                                  |
|                                             |                        |          |   |   | gene_id "XLOC_012714"; transcript_id "TCONS_00021653"; exon_number |
| "2"; oId "CUFF.20957.1"; tss_id "TSS16165"; |                        |          |   |   |                                                                    |
| chr12                                       | Cufflinks exon57856528 | 57856570 | . | - | .                                                                  |
|                                             |                        |          |   |   | gene_id "XLOC_012714"; transcript_id "TCONS_00021653"; exon_number |
| "3"; oId "CUFF.20957.1"; tss_id "TSS16165"; |                        |          |   |   |                                                                    |
| chr12                                       | Cufflinks exon57851247 | 57853344 | . | - | .                                                                  |
|                                             |                        |          |   |   | gene_id "XLOC_012714"; transcript_id "TCONS_00021655"; exon_number |
| "1"; oId "CUFF.20957.2"; tss_id "TSS16165"; |                        |          |   |   |                                                                    |
| chr12                                       | Cufflinks exon57856526 | 57856586 | . | - | .                                                                  |
|                                             |                        |          |   |   | gene_id "XLOC_012714"; transcript_id "TCONS_00021655"; exon_number |
| "2"; oId "CUFF.20957.2"; tss_id "TSS16165"; |                        |          |   |   |                                                                    |
| chr12                                       | Cufflinks exon58325232 | 58325520 | . | - | .                                                                  |
|                                             |                        |          |   |   | gene_id "XLOC_012730"; transcript_id "TCONS_00021689"; exon_number |
| "1"; oId "CUFF.21012.1"; tss_id "TSS16188"; |                        |          |   |   |                                                                    |
| chr12                                       | Cufflinks exon58329253 | 58329336 | . | - | .                                                                  |
|                                             |                        |          |   |   | gene_id "XLOC_012730"; transcript_id "TCONS_00021689"; exon_number |
| "2"; oId "CUFF.21012.1"; tss_id "TSS16188"; |                        |          |   |   |                                                                    |
| chr12                                       | Cufflinks exon58329622 | 58329947 | . | - | .                                                                  |
|                                             |                        |          |   |   | gene_id "XLOC_012730"; transcript_id "TCONS_00021689"; exon_number |
| "3"; oId "CUFF.21012.1"; tss_id "TSS16188"; |                        |          |   |   |                                                                    |
| chr12                                       | Cufflinks exon68726567 | 68727444 | . | - | .                                                                  |
|                                             |                        |          |   |   | gene_id "XLOC_012842"; transcript_id "TCONS_00021834"; exon_number |
| "1"; oId "CUFF.21286.1"; tss_id "TSS16316"; |                        |          |   |   |                                                                    |
| chr12                                       | Cufflinks exon68727942 | 68728123 | . | - | .                                                                  |
|                                             |                        |          |   |   | gene_id "XLOC_012842"; transcript_id "TCONS_00021834"; exon_number |
| "2"; oId "CUFF.21286.1"; tss_id "TSS16316"; |                        |          |   |   |                                                                    |
| chr12                                       | Cufflinks exon68825507 | 68825911 | . | - | .                                                                  |
|                                             |                        |          |   |   | gene_id "XLOC_012848"; transcript_id "TCONS_00021840"; exon_number |
| "1"; oId "CUFF.21292.3"; tss_id "TSS16322"; |                        |          |   |   |                                                                    |
| chr12                                       | Cufflinks exon68827064 | 68827151 | . | - | .                                                                  |
|                                             |                        |          |   |   | gene_id "XLOC_012848"; transcript_id "TCONS_00021840"; exon_number |
| "2"; oId "CUFF.21292.3"; tss_id "TSS16322"; |                        |          |   |   |                                                                    |

|       |                        |          |   |   |   |                                                                                                                |
|-------|------------------------|----------|---|---|---|----------------------------------------------------------------------------------------------------------------|
| chr12 | Cufflinks exon68835844 | 68835921 | . | - | . | gene_id "XLOC_012848"; transcript_id "TCONS_00021840"; exon_number "3"; oId "CUFF.21292.3"; tss_id "TSS16322"; |
| chr12 | Cufflinks exon68845147 | 68845264 | . | - | . | gene_id "XLOC_012848"; transcript_id "TCONS_00021840"; exon_number "4"; oId "CUFF.21292.3"; tss_id "TSS16322"; |
| chr12 | Cufflinks exon68825507 | 68825911 | . | - | . | gene_id "XLOC_012848"; transcript_id "TCONS_00021841"; exon_number "1"; oId "CUFF.21292.2"; tss_id "TSS16322"; |
| chr12 | Cufflinks exon68826295 | 68826410 | . | - | . | gene_id "XLOC_012848"; transcript_id "TCONS_00021841"; exon_number "2"; oId "CUFF.21292.2"; tss_id "TSS16322"; |
| chr12 | Cufflinks exon68827064 | 68827151 | . | - | . | gene_id "XLOC_012848"; transcript_id "TCONS_00021841"; exon_number "3"; oId "CUFF.21292.2"; tss_id "TSS16322"; |
| chr12 | Cufflinks exon68835844 | 68835921 | . | - | . | gene_id "XLOC_012848"; transcript_id "TCONS_00021841"; exon_number "4"; oId "CUFF.21292.2"; tss_id "TSS16322"; |
| chr12 | Cufflinks exon68845147 | 68845342 | . | - | . | gene_id "XLOC_012848"; transcript_id "TCONS_00021841"; exon_number "5"; oId "CUFF.21292.2"; tss_id "TSS16322"; |
| chr12 | Cufflinks exon69067694 | 69069601 | . | - | . | gene_id "XLOC_012851"; transcript_id "TCONS_00021845"; exon_number "1"; oId "CUFF.21303.3"; tss_id "TSS16325"; |
| chr12 | Cufflinks exon69079643 | 69079791 | . | - | . | gene_id "XLOC_012851"; transcript_id "TCONS_00021845"; exon_number "2"; oId "CUFF.21303.3"; tss_id "TSS16325"; |
| chr12 | Cufflinks exon69080517 | 69080639 | . | - | . | gene_id "XLOC_012851"; transcript_id "TCONS_00021845"; exon_number "3"; oId "CUFF.21303.3"; tss_id "TSS16325"; |
| chr12 | Cufflinks exon69067694 | 69069601 | . | - | . | gene_id "XLOC_012851"; transcript_id "TCONS_00021844"; exon_number "1"; oId "CUFF.21303.2"; tss_id "TSS16325"; |
| chr12 | Cufflinks exon69079643 | 69079797 | . | - | . | gene_id "XLOC_012851"; transcript_id "TCONS_00021844"; exon_number "2"; oId "CUFF.21303.2"; tss_id "TSS16325"; |
| chr12 | Cufflinks exon69080517 | 69080639 | . | - | . | gene_id "XLOC_012851"; transcript_id "TCONS_00021844"; exon_number "3"; oId "CUFF.21303.2"; tss_id "TSS16325"; |
| chr12 | Cufflinks exon69067694 | 69069601 | . | - | . | gene_id "XLOC_012851"; transcript_id "TCONS_00021846"; exon_number "1"; oId "CUFF.21303.1"; tss_id "TSS16325"; |
| chr12 | Cufflinks exon69079643 | 69079802 | . | - | . | gene_id "XLOC_012851"; transcript_id "TCONS_00021846"; exon_number "2"; oId "CUFF.21303.1"; tss_id "TSS16325"; |
| chr12 | Cufflinks exon69080522 | 69080661 | . | - | . | gene_id "XLOC_012851"; transcript_id "TCONS_00021846"; exon_number "3"; oId "CUFF.21303.1"; tss_id "TSS16325"; |
| chr12 | Cufflinks exon76025026 | 76025094 | . | - | . | gene_id "XLOC_012903"; transcript_id "TCONS_00021918"; exon_number "1"; oId "CUFF.21506.1"; tss_id "TSS16387"; |
| chr12 | Cufflinks exon76085885 | 76086056 | . | - | . | gene_id "XLOC_012903"; transcript_id "TCONS_00021918"; exon_number "2"; oId "CUFF.21506.1"; tss_id "TSS16387"; |
| chr12 | Cufflinks exon89404477 | 89407094 | . | - | . | gene_id "XLOC_012951"; transcript_id "TCONS_00021994"; exon_number "1"; oId "CUFF.21695.3"; tss_id "TSS16444"; |
| chr12 | Cufflinks exon89408469 | 89408645 | . | - | . | gene_id "XLOC_012951"; transcript_id "TCONS_00021994"; exon_number "2"; oId "CUFF.21695.3"; tss_id "TSS16444"; |
| chr12 | Cufflinks exon89413330 | 89413469 | . | - | . | gene_id "XLOC_012951"; transcript_id "TCONS_00021994"; exon_number "3"; oId "CUFF.21695.3"; tss_id "TSS16444"; |
| chr12 | Cufflinks exon89404477 | 89407094 | . | - | . | gene_id "XLOC_012951"; transcript_id "TCONS_00021995"; exon_number                                             |

|                                             |                        |          |   |   |                                                                    |
|---------------------------------------------|------------------------|----------|---|---|--------------------------------------------------------------------|
| "1"; oId "CUFF.21695.1"; tss_id "TSS16445"; |                        |          |   |   |                                                                    |
| chr12                                       | Cufflinks exon89408469 | 89408645 | . | - | .                                                                  |
| "2"; oId "CUFF.21695.1"; tss_id "TSS16445"; |                        |          |   |   | gene_id "XLOC_012951"; transcript_id "TCONS_00021995"; exon_number |
| chr12                                       | Cufflinks exon89416648 | 89416693 | . | - | .                                                                  |
| "3"; oId "CUFF.21695.1"; tss_id "TSS16445"; |                        |          |   |   | gene_id "XLOC_012951"; transcript_id "TCONS_00021995"; exon_number |
| chr12                                       | Cufflinks exon89421400 | 89422340 | . | - | .                                                                  |
| "4"; oId "CUFF.21695.1"; tss_id "TSS16445"; |                        |          |   |   | gene_id "XLOC_012951"; transcript_id "TCONS_00021995"; exon_number |
| chr12                                       | Cufflinks exon89404477 | 89407094 | . | - | .                                                                  |
| "1"; oId "CUFF.21695.2"; tss_id "TSS16446"; |                        |          |   |   | gene_id "XLOC_012951"; transcript_id "TCONS_00021996"; exon_number |
| chr12                                       | Cufflinks exon89408469 | 89408645 | . | - | .                                                                  |
| "2"; oId "CUFF.21695.2"; tss_id "TSS16446"; |                        |          |   |   | gene_id "XLOC_012951"; transcript_id "TCONS_00021996"; exon_number |
| chr12                                       | Cufflinks exon89416648 | 89416693 | . | - | .                                                                  |
| "3"; oId "CUFF.21695.2"; tss_id "TSS16446"; |                        |          |   |   | gene_id "XLOC_012951"; transcript_id "TCONS_00021996"; exon_number |
| chr12                                       | Cufflinks exon89426404 | 89426913 | . | - | .                                                                  |
| "4"; oId "CUFF.21695.2"; tss_id "TSS16446"; |                        |          |   |   | gene_id "XLOC_012951"; transcript_id "TCONS_00021996"; exon_number |
| chr12                                       | Cufflinks exon89404477 | 89407094 | . | - | .                                                                  |
| "1"; oId "CUFF.21695.4"; tss_id "TSS16447"; |                        |          |   |   | gene_id "XLOC_012951"; transcript_id "TCONS_00021997"; exon_number |
| chr12                                       | Cufflinks exon89408469 | 89408645 | . | - | .                                                                  |
| "2"; oId "CUFF.21695.4"; tss_id "TSS16447"; |                        |          |   |   | gene_id "XLOC_012951"; transcript_id "TCONS_00021997"; exon_number |
| chr12                                       | Cufflinks exon89416648 | 89416693 | . | - | .                                                                  |
| "3"; oId "CUFF.21695.4"; tss_id "TSS16447"; |                        |          |   |   | gene_id "XLOC_012951"; transcript_id "TCONS_00021997"; exon_number |
| chr12                                       | Cufflinks exon89441239 | 89441378 | . | - | .                                                                  |
| "4"; oId "CUFF.21695.4"; tss_id "TSS16447"; |                        |          |   |   | gene_id "XLOC_012951"; transcript_id "TCONS_00021997"; exon_number |
| chr12                                       | Cufflinks exon89442053 | 89442119 | . | - | .                                                                  |
| "5"; oId "CUFF.21695.4"; tss_id "TSS16447"; |                        |          |   |   | gene_id "XLOC_012951"; transcript_id "TCONS_00021997"; exon_number |
| chr12                                       | Cufflinks exon89444884 | 89444895 | . | - | .                                                                  |
| "6"; oId "CUFF.21695.4"; tss_id "TSS16447"; |                        |          |   |   | gene_id "XLOC_012951"; transcript_id "TCONS_00021997"; exon_number |
| chr12                                       | Cufflinks exon90060797 | 90061441 | . | - | .                                                                  |
| "1"; oId "CUFF.21745.1"; tss_id "TSS16478"; |                        |          |   |   | gene_id "XLOC_012978"; transcript_id "TCONS_00022033"; exon_number |
| chr12                                       | Cufflinks exon90061952 | 90062080 | . | - | .                                                                  |
| "2"; oId "CUFF.21745.1"; tss_id "TSS16478"; |                        |          |   |   | gene_id "XLOC_012978"; transcript_id "TCONS_00022033"; exon_number |
| chr12                                       | Cufflinks exon90064262 | 90064464 | . | - | .                                                                  |
| "3"; oId "CUFF.21745.1"; tss_id "TSS16478"; |                        |          |   |   | gene_id "XLOC_012978"; transcript_id "TCONS_00022033"; exon_number |
| chr12                                       | Cufflinks exon92662712 | 92662755 | . | - | .                                                                  |
| "1"; oId "CUFF.21799.2"; tss_id "TSS16515"; |                        |          |   |   | gene_id "XLOC_013012"; transcript_id "TCONS_00022075"; exon_number |
| chr12                                       | Cufflinks exon92731241 | 92731283 | . | - | .                                                                  |
| "2"; oId "CUFF.21799.2"; tss_id "TSS16515"; |                        |          |   |   | gene_id "XLOC_013012"; transcript_id "TCONS_00022075"; exon_number |
| chr12                                       | Cufflinks exon92751307 | 92751450 | . | - | .                                                                  |
| "3"; oId "CUFF.21799.2"; tss_id "TSS16515"; |                        |          |   |   | gene_id "XLOC_013012"; transcript_id "TCONS_00022075"; exon_number |
| chr12                                       | Cufflinks exon92757367 | 92757570 | . | - | .                                                                  |
| "4"; oId "CUFF.21799.2"; tss_id "TSS16515"; |                        |          |   |   | gene_id "XLOC_013012"; transcript_id "TCONS_00022075"; exon_number |
| chr12                                       | Cufflinks exon92662712 | 92662755 | . | - | .                                                                  |
| "1"; oId "CUFF.21799.1"; tss_id "TSS16515"; |                        |          |   |   | gene_id "XLOC_013012"; transcript_id "TCONS_00022074"; exon_number |



|       |                |          |          |   |   |   |                                                                                                                |
|-------|----------------|----------|----------|---|---|---|----------------------------------------------------------------------------------------------------------------|
| chr12 | Cufflinks exon | 92751307 | 92751450 | . | - | . | gene_id "XLOC_013012"; transcript_id "TCONS_00022074"; exon_number "2"; oId "CUFF.21799.1"; tss_id "TSS16515"; |
| chr12 | Cufflinks exon | 92757367 | 92757570 | . | - | . | gene_id "XLOC_013012"; transcript_id "TCONS_00022074"; exon_number "3"; oId "CUFF.21799.1"; tss_id "TSS16515"; |
| chr12 | Cufflinks exon | 92688236 | 92688278 | . | - | . | gene_id "XLOC_013012"; transcript_id "TCONS_00022076"; exon_number "1"; oId "CUFF.21799.3"; tss_id "TSS16515"; |
| chr12 | Cufflinks exon | 92731241 | 92731283 | . | - | . | gene_id "XLOC_013012"; transcript_id "TCONS_00022076"; exon_number "2"; oId "CUFF.21799.3"; tss_id "TSS16515"; |
| chr12 | Cufflinks exon | 92751307 | 92751450 | . | - | . | gene_id "XLOC_013012"; transcript_id "TCONS_00022076"; exon_number "3"; oId "CUFF.21799.3"; tss_id "TSS16515"; |
| chr12 | Cufflinks exon | 92757367 | 92757574 | . | - | . | gene_id "XLOC_013012"; transcript_id "TCONS_00022076"; exon_number "4"; oId "CUFF.21799.3"; tss_id "TSS16515"; |
| chr12 | Cufflinks exon | 92751433 | 92751450 | . | - | . | gene_id "XLOC_013012"; transcript_id "TCONS_00022077"; exon_number "1"; oId "CUFF.21799.4"; tss_id "TSS16515"; |
| chr12 | Cufflinks exon | 92756727 | 92757574 | . | - | . | gene_id "XLOC_013012"; transcript_id "TCONS_00022077"; exon_number "2"; oId "CUFF.21799.4"; tss_id "TSS16515"; |
| chr12 | Cufflinks exon | 93959404 | 93959520 | . | - | . | gene_id "XLOC_013029"; transcript_id "TCONS_00022100"; exon_number "1"; oId "CUFF.21843.1"; tss_id "TSS16535"; |
| chr12 | Cufflinks exon | 93960520 | 93960746 | . | - | . | gene_id "XLOC_013029"; transcript_id "TCONS_00022100"; exon_number "2"; oId "CUFF.21843.1"; tss_id "TSS16535"; |
| chr12 | Cufflinks exon | 93960840 | 93960935 | . | - | . | gene_id "XLOC_013029"; transcript_id "TCONS_00022100"; exon_number "3"; oId "CUFF.21843.1"; tss_id "TSS16535"; |
| chr12 | Cufflinks exon | 93965041 | 93965174 | . | - | . | gene_id "XLOC_013029"; transcript_id "TCONS_00022100"; exon_number "4"; oId "CUFF.21843.1"; tss_id "TSS16535"; |
| chr12 | Cufflinks exon | 94033662 | 94034940 | . | - | . | gene_id "XLOC_013033"; transcript_id "TCONS_00022105"; exon_number "1"; oId "CUFF.21853.1"; tss_id "TSS16540"; |
| chr12 | Cufflinks exon | 94121794 | 94121804 | . | - | . | gene_id "XLOC_013033"; transcript_id "TCONS_00022105"; exon_number "2"; oId "CUFF.21853.1"; tss_id "TSS16540"; |
| chr12 | Cufflinks exon | 94493094 | 94495608 | . | - | . | gene_id "XLOC_013035"; transcript_id "TCONS_00022107"; exon_number "1"; oId "CUFF.21874.1"; tss_id "TSS16542"; |
| chr12 | Cufflinks exon | 94495694 | 94496088 | . | - | . | gene_id "XLOC_013035"; transcript_id "TCONS_00022107"; exon_number "2"; oId "CUFF.21874.1"; tss_id "TSS16542"; |
| chr12 | Cufflinks exon | 96664650 | 96666535 | . | - | . | gene_id "XLOC_013063"; transcript_id "TCONS_00022175"; exon_number "1"; oId "CUFF.21978.3"; tss_id "TSS16581"; |
| chr12 | Cufflinks exon | 96671831 | 96671897 | . | - | . | gene_id "XLOC_013063"; transcript_id "TCONS_00022175"; exon_number "2"; oId "CUFF.21978.3"; tss_id "TSS16581"; |
| chr12 | Cufflinks exon | 98731541 | 98732224 | . | - | . | gene_id "XLOC_013075"; transcript_id "TCONS_00022189"; exon_number "1"; oId "CUFF.22006.1"; tss_id "TSS16597"; |
| chr12 | Cufflinks exon | 98738594 | 98738796 | . | - | . | gene_id "XLOC_013075"; transcript_id "TCONS_00022189"; exon_number "2"; oId "CUFF.22006.1"; tss_id "TSS16597"; |
| chr12 | Cufflinks exon | 98739017 | 98739031 | . | - | . | gene_id "XLOC_013075"; transcript_id "TCONS_00022189"; exon_number "3"; oId "CUFF.22006.1"; tss_id "TSS16597"; |
| chr12 | Cufflinks exon | 98906751 | 98909675 | . | - | . | gene_id "XLOC_013080"; transcript_id "TCONS_00022194"; exon_number                                             |



|       |                |           |           |   |   |   |                                                                                                                |
|-------|----------------|-----------|-----------|---|---|---|----------------------------------------------------------------------------------------------------------------|
| chr12 | Cufflinks exon | 104160513 | 104160691 | . | - | . | gene_id "XLOC_013110"; transcript_id "TCONS_00022248"; exon_number "2"; oId "CUFF.22141.8"; tss_id "TSS16641"; |
| chr12 | Cufflinks exon | 104162585 | 104162615 | . | - | . | gene_id "XLOC_013110"; transcript_id "TCONS_00022248"; exon_number "3"; oId "CUFF.22141.8"; tss_id "TSS16641"; |
| chr12 | Cufflinks exon | 104158984 | 104160364 | . | - | . | gene_id "XLOC_013110"; transcript_id "TCONS_00022249"; exon_number "1"; oId "CUFF.22141.9"; tss_id "TSS16642"; |
| chr12 | Cufflinks exon | 104160513 | 104160700 | . | - | . | gene_id "XLOC_013110"; transcript_id "TCONS_00022249"; exon_number "2"; oId "CUFF.22141.9"; tss_id "TSS16642"; |
| chr12 | Cufflinks exon | 104162594 | 104162775 | . | - | . | gene_id "XLOC_013110"; transcript_id "TCONS_00022249"; exon_number "3"; oId "CUFF.22141.9"; tss_id "TSS16642"; |
| chr12 | Cufflinks exon | 104163697 | 104164000 | . | - | . | gene_id "XLOC_013110"; transcript_id "TCONS_00022249"; exon_number "4"; oId "CUFF.22141.9"; tss_id "TSS16642"; |
| chr12 | Cufflinks exon | 110168872 | 110172398 | . | - | . | gene_id "XLOC_013161"; transcript_id "TCONS_00022351"; exon_number "1"; oId "CUFF.22406.2"; tss_id "TSS16712"; |
| chr12 | Cufflinks exon | 110173396 | 110173626 | . | - | . | gene_id "XLOC_013161"; transcript_id "TCONS_00022351"; exon_number "2"; oId "CUFF.22406.2"; tss_id "TSS16712"; |
| chr12 | Cufflinks exon | 110179910 | 110179970 | . | - | . | gene_id "XLOC_013161"; transcript_id "TCONS_00022351"; exon_number "3"; oId "CUFF.22406.2"; tss_id "TSS16712"; |
| chr12 | Cufflinks exon | 110211102 | 110211298 | . | - | . | gene_id "XLOC_013161"; transcript_id "TCONS_00022351"; exon_number "4"; oId "CUFF.22406.2"; tss_id "TSS16712"; |
| chr12 | Cufflinks exon | 110168872 | 110172398 | . | - | . | gene_id "XLOC_013161"; transcript_id "TCONS_00022350"; exon_number "1"; oId "CUFF.22406.1"; tss_id "TSS16712"; |
| chr12 | Cufflinks exon | 110173396 | 110173626 | . | - | . | gene_id "XLOC_013161"; transcript_id "TCONS_00022350"; exon_number "2"; oId "CUFF.22406.1"; tss_id "TSS16712"; |
| chr12 | Cufflinks exon | 110211102 | 110211298 | . | - | . | gene_id "XLOC_013161"; transcript_id "TCONS_00022350"; exon_number "3"; oId "CUFF.22406.1"; tss_id "TSS16712"; |
| chr12 | Cufflinks exon | 110807563 | 110808164 | . | - | . | gene_id "XLOC_013188"; transcript_id "TCONS_00022387"; exon_number "1"; oId "CUFF.22471.2"; tss_id "TSS16741"; |
| chr12 | Cufflinks exon | 110808576 | 110809833 | . | - | . | gene_id "XLOC_013188"; transcript_id "TCONS_00022387"; exon_number "2"; oId "CUFF.22471.2"; tss_id "TSS16741"; |
| chr12 | Cufflinks exon | 110807563 | 110808628 | . | - | . | gene_id "XLOC_013188"; transcript_id "TCONS_00022388"; exon_number "1"; oId "CUFF.22471.1"; tss_id "TSS16742"; |
| chr12 | Cufflinks exon | 110808737 | 110810412 | . | - | . | gene_id "XLOC_013188"; transcript_id "TCONS_00022388"; exon_number "2"; oId "CUFF.22471.1"; tss_id "TSS16742"; |
| chr12 | Cufflinks exon | 110837557 | 110837593 | . | - | . | gene_id "XLOC_013188"; transcript_id "TCONS_00022388"; exon_number "3"; oId "CUFF.22471.1"; tss_id "TSS16742"; |
| chr12 | Cufflinks exon | 111146162 | 111146839 | . | - | . | gene_id "XLOC_013197"; transcript_id "TCONS_00022405"; exon_number "1"; oId "CUFF.22505.3"; tss_id "TSS16755"; |
| chr12 | Cufflinks exon | 111154573 | 111156314 | . | - | . | gene_id "XLOC_013197"; transcript_id "TCONS_00022405"; exon_number "2"; oId "CUFF.22505.3"; tss_id "TSS16755"; |
| chr12 | Cufflinks exon | 117434154 | 117468008 | . | - | . | gene_id "XLOC_013235"; transcript_id "TCONS_00022491"; exon_number "1"; oId "CUFF.22653.1"; tss_id "TSS16806"; |
| chr12 | Cufflinks exon | 117468094 | 117468161 | . | - | . | gene_id "XLOC_013235"; transcript_id "TCONS_00022491"; exon_number                                             |

"2"; oId "CUFF.22653.1"; tss\_id "TSS16806";  
chr12 Cufflinks exon117468512 117475095 . - . gene\_id "XLOC\_013235"; transcript\_id "TCONS\_00022491"; exon\_number  
"3"; oId "CUFF.22653.1"; tss\_id "TSS16806";  
chr12 Cufflinks exon121067415 121068299 . - . gene\_id "XLOC\_013266"; transcript\_id "TCONS\_00022568"; exon\_number  
"1"; oId "CUFF.22775.3"; tss\_id "TSS16860";  
chr12 Cufflinks exon121068998 121069044 . - . gene\_id "XLOC\_013266"; transcript\_id "TCONS\_00022568"; exon\_number  
"2"; oId "CUFF.22775.3"; tss\_id "TSS16860";  
chr12 Cufflinks exon121067415 121068299 . - . gene\_id "XLOC\_013266"; transcript\_id "TCONS\_00022569"; exon\_number  
"1"; oId "CUFF.22775.2"; tss\_id "TSS16861";  
chr12 Cufflinks exon121077853 121078304 . - . gene\_id "XLOC\_013266"; transcript\_id "TCONS\_00022569"; exon\_number  
"2"; oId "CUFF.22775.2"; tss\_id "TSS16861";  
chr12 Cufflinks exon121067415 121068299 . - . gene\_id "XLOC\_013266"; transcript\_id "TCONS\_00022570"; exon\_number  
"1"; oId "CUFF.22775.1"; tss\_id "TSS16861";  
chr12 Cufflinks exon121077921 121078310 . - . gene\_id "XLOC\_013266"; transcript\_id "TCONS\_00022570"; exon\_number  
"2"; oId "CUFF.22775.1"; tss\_id "TSS16861";  
chr12 Cufflinks exon121068624 121069194 . - . gene\_id "XLOC\_013266"; transcript\_id "TCONS\_00022571"; exon\_number  
"1"; oId "CUFF.22775.4"; tss\_id "TSS16862";  
chr12 Cufflinks exon121075789 121075833 . - . gene\_id "XLOC\_013266"; transcript\_id "TCONS\_00022571"; exon\_number  
"2"; oId "CUFF.22775.4"; tss\_id "TSS16862";  
chr12 Cufflinks exon122438553 122442991 . - . gene\_id "XLOC\_013293"; transcript\_id "TCONS\_00022618"; exon\_number  
"1"; oId "CUFF.22884.8"; tss\_id "TSS16900";  
chr12 Cufflinks exon122443518 122444671 . - . gene\_id "XLOC\_013293"; transcript\_id "TCONS\_00022618"; exon\_number  
"2"; oId "CUFF.22884.8"; tss\_id "TSS16900";  
chr12 Cufflinks exon122438553 122443424 . - . gene\_id "XLOC\_013293"; transcript\_id "TCONS\_00022620"; exon\_number  
"1"; oId "CUFF.22884.6"; tss\_id "TSS16902";  
chr12 Cufflinks exon122443518 122444673 . - . gene\_id "XLOC\_013293"; transcript\_id "TCONS\_00022620"; exon\_number  
"2"; oId "CUFF.22884.6"; tss\_id "TSS16902";  
chr12 Cufflinks exon122445787 122445840 . - . gene\_id "XLOC\_013293"; transcript\_id "TCONS\_00022620"; exon\_number  
"3"; oId "CUFF.22884.6"; tss\_id "TSS16902";  
chr12 Cufflinks exon122457606 122458744 . - . gene\_id "XLOC\_013293"; transcript\_id "TCONS\_00022620"; exon\_number  
"4"; oId "CUFF.22884.6"; tss\_id "TSS16902";  
chr12 Cufflinks exon125089572 125089824 . - . gene\_id "XLOC\_013365"; transcript\_id "TCONS\_00022736"; exon\_number  
"1"; oId "CUFF.23119.2"; tss\_id "TSS16993";  
chr12 Cufflinks exon125090830 125090906 . - . gene\_id "XLOC\_013365"; transcript\_id "TCONS\_00022736"; exon\_number  
"2"; oId "CUFF.23119.2"; tss\_id "TSS16993";  
chr12 Cufflinks exon125092061 125092083 . - . gene\_id "XLOC\_013365"; transcript\_id "TCONS\_00022736"; exon\_number  
"3"; oId "CUFF.23119.2"; tss\_id "TSS16993";  
chr12 Cufflinks exon125089572 125089824 . - . gene\_id "XLOC\_013365"; transcript\_id "TCONS\_00022737"; exon\_number  
"1"; oId "CUFF.23119.3"; tss\_id "TSS16994";  
chr12 Cufflinks exon125090830 125090905 . - . gene\_id "XLOC\_013365"; transcript\_id "TCONS\_00022737"; exon\_number  
"2"; oId "CUFF.23119.3"; tss\_id "TSS16994";  
chr12 Cufflinks exon125092060 125092188 . - . gene\_id "XLOC\_013365"; transcript\_id "TCONS\_00022737"; exon\_number  
"3"; oId "CUFF.23119.3"; tss\_id "TSS16994";

|       |                |           |           |   |   |   |                                                                                                                |
|-------|----------------|-----------|-----------|---|---|---|----------------------------------------------------------------------------------------------------------------|
| chr12 | Cufflinks exon | 125093249 | 125093613 | . | - | . | gene_id "XLOC_013365"; transcript_id "TCONS_00022737"; exon_number "4"; oId "CUFF.23119.3"; tss_id "TSS16994"; |
| chr12 | Cufflinks exon | 125167673 | 125171511 | . | - | . | gene_id "XLOC_013369"; transcript_id "TCONS_00022741"; exon_number "1"; oId "CUFF.23132.1"; tss_id "TSS16998"; |
| chr12 | Cufflinks exon | 125172208 | 125172228 | . | - | . | gene_id "XLOC_013369"; transcript_id "TCONS_00022741"; exon_number "2"; oId "CUFF.23132.1"; tss_id "TSS16998"; |
| chr12 | Cufflinks exon | 127398030 | 127399995 | . | - | . | gene_id "XLOC_013390"; transcript_id "TCONS_00022772"; exon_number "1"; oId "CUFF.23195.3"; tss_id "TSS17024"; |
| chr12 | Cufflinks exon | 127407253 | 127407505 | . | - | . | gene_id "XLOC_013390"; transcript_id "TCONS_00022772"; exon_number "2"; oId "CUFF.23195.3"; tss_id "TSS17024"; |
| chr12 | Cufflinks exon | 127407576 | 127407751 | . | - | . | gene_id "XLOC_013390"; transcript_id "TCONS_00022772"; exon_number "3"; oId "CUFF.23195.3"; tss_id "TSS17024"; |
| chr12 | Cufflinks exon | 127460384 | 127460462 | . | - | . | gene_id "XLOC_013390"; transcript_id "TCONS_00022772"; exon_number "4"; oId "CUFF.23195.3"; tss_id "TSS17024"; |
| chr12 | Cufflinks exon | 127485101 | 127485195 | . | - | . | gene_id "XLOC_013390"; transcript_id "TCONS_00022772"; exon_number "5"; oId "CUFF.23195.3"; tss_id "TSS17024"; |
| chr12 | Cufflinks exon | 127516412 | 127516611 | . | - | . | gene_id "XLOC_013390"; transcript_id "TCONS_00022772"; exon_number "6"; oId "CUFF.23195.3"; tss_id "TSS17024"; |
| chr12 | Cufflinks exon | 127544632 | 127544942 | . | - | . | gene_id "XLOC_013390"; transcript_id "TCONS_00022772"; exon_number "7"; oId "CUFF.23195.3"; tss_id "TSS17024"; |
| chr12 | Cufflinks exon | 127903811 | 127903861 | . | - | . | gene_id "XLOC_013400"; transcript_id "TCONS_00022782"; exon_number "1"; oId "CUFF.23217.1"; tss_id "TSS17034"; |
| chr12 | Cufflinks exon | 127908174 | 127908366 | . | - | . | gene_id "XLOC_013400"; transcript_id "TCONS_00022782"; exon_number "2"; oId "CUFF.23217.1"; tss_id "TSS17034"; |
| chr12 | Cufflinks exon | 127908791 | 127908910 | . | - | . | gene_id "XLOC_013400"; transcript_id "TCONS_00022782"; exon_number "3"; oId "CUFF.23217.1"; tss_id "TSS17034"; |
| chr12 | Cufflinks exon | 132408902 | 132409311 | . | - | . | gene_id "XLOC_013453"; transcript_id "TCONS_00022855"; exon_number "1"; oId "CUFF.23354.1"; tss_id "TSS17098"; |
| chr12 | Cufflinks exon | 132412508 | 132413523 | . | - | . | gene_id "XLOC_013453"; transcript_id "TCONS_00022855"; exon_number "2"; oId "CUFF.23354.1"; tss_id "TSS17098"; |
| chr12 | Cufflinks exon | 132671279 | 132672246 | . | - | . | gene_id "XLOC_013456"; transcript_id "TCONS_00022860"; exon_number "1"; oId "CUFF.23372.2"; tss_id "TSS17102"; |
| chr12 | Cufflinks exon | 132673724 | 132674429 | . | - | . | gene_id "XLOC_013456"; transcript_id "TCONS_00022860"; exon_number "2"; oId "CUFF.23372.2"; tss_id "TSS17102"; |
| chr12 | Cufflinks exon | 132908427 | 132909380 | . | - | . | gene_id "XLOC_013459"; transcript_id "TCONS_00022869"; exon_number "1"; oId "CUFF.23383.1"; tss_id "TSS17109"; |
| chr12 | Cufflinks exon | 132909555 | 132910657 | . | - | . | gene_id "XLOC_013459"; transcript_id "TCONS_00022869"; exon_number "2"; oId "CUFF.23383.1"; tss_id "TSS17109"; |
| chr12 | Cufflinks exon | 132916777 | 132916910 | . | - | . | gene_id "XLOC_013459"; transcript_id "TCONS_00022869"; exon_number "3"; oId "CUFF.23383.1"; tss_id "TSS17109"; |
| chr12 | Cufflinks exon | 132917585 | 132919112 | . | - | . | gene_id "XLOC_013459"; transcript_id "TCONS_00022869"; exon_number "4"; oId "CUFF.23383.1"; tss_id "TSS17109"; |
| chr12 | Cufflinks exon | 132909672 | 132910657 | . | - | . | gene_id "XLOC_013459"; transcript_id "TCONS_00022870"; exon_number                                             |

|                                             |   |   |   |                                                                    |
|---------------------------------------------|---|---|---|--------------------------------------------------------------------|
| "1"; oId "CUFF.23383.2"; tss_id "TSS17110"; |   |   |   |                                                                    |
| chr12 Cufflinks exon132916699 132916772     | . | - | . | gene_id "XLOC_013459"; transcript_id "TCONS_00022870"; exon_number |
| "2"; oId "CUFF.23383.2"; tss_id "TSS17110"; |   |   |   |                                                                    |
| chr12 Cufflinks exon132909672 132916910     | . | - | . | gene_id "XLOC_013459"; transcript_id "TCONS_00022871"; exon_number |
| "1"; oId "CUFF.23383.4"; tss_id "TSS17111"; |   |   |   |                                                                    |
| chr12 Cufflinks exon132917585 132917882     | . | - | . | gene_id "XLOC_013459"; transcript_id "TCONS_00022871"; exon_number |
| "2"; oId "CUFF.23383.4"; tss_id "TSS17111"; |   |   |   |                                                                    |
| chr12 Cufflinks exon132909672 132916910     | . | - | . | gene_id "XLOC_013459"; transcript_id "TCONS_00022872"; exon_number |
| "1"; oId "CUFF.23383.3"; tss_id "TSS17109"; |   |   |   |                                                                    |
| chr12 Cufflinks exon132919121 132919183     | . | - | . | gene_id "XLOC_013459"; transcript_id "TCONS_00022872"; exon_number |
| "2"; oId "CUFF.23383.3"; tss_id "TSS17109"; |   |   |   |                                                                    |
| chr12 Cufflinks exon132928717 132929193     | . | - | . | gene_id "XLOC_013462"; transcript_id "TCONS_00022875"; exon_number |
| "1"; oId "CUFF.23387.1"; tss_id "TSS17114"; |   |   |   |                                                                    |
| chr12 Cufflinks exon132930501 132931673     | . | - | . | gene_id "XLOC_013462"; transcript_id "TCONS_00022875"; exon_number |
| "2"; oId "CUFF.23387.1"; tss_id "TSS17114"; |   |   |   |                                                                    |
| chr12 Cufflinks exon132934436 132935316     | . | - | . | gene_id "XLOC_013462"; transcript_id "TCONS_00022875"; exon_number |
| "3"; oId "CUFF.23387.1"; tss_id "TSS17114"; |   |   |   |                                                                    |
| chr12 Cufflinks exon132937145 132937658     | . | - | . | gene_id "XLOC_013465"; transcript_id "TCONS_00022879"; exon_number |
| "1"; oId "CUFF.23388.2"; tss_id "TSS17118"; |   |   |   |                                                                    |
| chr12 Cufflinks exon132939181 132939664     | . | - | . | gene_id "XLOC_013465"; transcript_id "TCONS_00022879"; exon_number |
| "2"; oId "CUFF.23388.2"; tss_id "TSS17118"; |   |   |   |                                                                    |
| chr12 Cufflinks exon133001101 133003535     | . | - | . | gene_id "XLOC_013466"; transcript_id "TCONS_00022880"; exon_number |
| "1"; oId "CUFF.23394.1"; tss_id "TSS17119"; |   |   |   |                                                                    |
| chr12 Cufflinks exon133004324 133005479     | . | - | . | gene_id "XLOC_013466"; transcript_id "TCONS_00022880"; exon_number |
| "2"; oId "CUFF.23394.1"; tss_id "TSS17119"; |   |   |   |                                                                    |
| chr12 Cufflinks exon133005564 133005697     | . | - | . | gene_id "XLOC_013466"; transcript_id "TCONS_00022880"; exon_number |
| "3"; oId "CUFF.23394.1"; tss_id "TSS17119"; |   |   |   |                                                                    |
| chr12 Cufflinks exon133007565 133012124     | . | - | . | gene_id "XLOC_013466"; transcript_id "TCONS_00022880"; exon_number |
| "4"; oId "CUFF.23394.1"; tss_id "TSS17119"; |   |   |   |                                                                    |
| chr12 Cufflinks exon133052026 133052280     | . | - | . | gene_id "XLOC_013470"; transcript_id "TCONS_00022885"; exon_number |
| "1"; oId "CUFF.23405.2"; tss_id "TSS17123"; |   |   |   |                                                                    |
| chr12 Cufflinks exon133052622 133053506     | . | - | . | gene_id "XLOC_013470"; transcript_id "TCONS_00022885"; exon_number |
| "2"; oId "CUFF.23405.2"; tss_id "TSS17123"; |   |   |   |                                                                    |
| chr12 Cufflinks exon133409027 133409823     | . | - | . | gene_id "XLOC_013482"; transcript_id "TCONS_00022906"; exon_number |
| "1"; oId "CUFF.23441.1"; tss_id "TSS17139"; |   |   |   |                                                                    |
| chr12 Cufflinks exon133414224 133414651     | . | - | . | gene_id "XLOC_013482"; transcript_id "TCONS_00022906"; exon_number |
| "2"; oId "CUFF.23441.1"; tss_id "TSS17139"; |   |   |   |                                                                    |
| chr13 Cufflinks exon20673368 20673484       | . | + | . | gene_id "XLOC_013511"; transcript_id "TCONS_00022951"; exon_number |
| "1"; oId "CUFF.23574.1"; tss_id "TSS17173"; |   |   |   |                                                                    |
| chr13 Cufflinks exon20709723 20709820       | . | + | . | gene_id "XLOC_013511"; transcript_id "TCONS_00022951"; exon_number |
| "2"; oId "CUFF.23574.1"; tss_id "TSS17173"; |   |   |   |                                                                    |
| chr13 Cufflinks exon20710819 20711227       | . | + | . | gene_id "XLOC_013511"; transcript_id "TCONS_00022951"; exon_number |
| "3"; oId "CUFF.23574.1"; tss_id "TSS17173"; |   |   |   |                                                                    |

|       |                |          |          |   |   |   |                                                                                                                |
|-------|----------------|----------|----------|---|---|---|----------------------------------------------------------------------------------------------------------------|
| chr13 | Cufflinks exon | 20673467 | 20673484 | . | + | . | gene_id "XLOC_013511"; transcript_id "TCONS_00022952"; exon_number "1"; oId "CUFF.23574.2"; tss_id "TSS17173"; |
| chr13 | Cufflinks exon | 20676832 | 20676965 | . | + | . | gene_id "XLOC_013511"; transcript_id "TCONS_00022952"; exon_number "2"; oId "CUFF.23574.2"; tss_id "TSS17173"; |
| chr13 | Cufflinks exon | 20677065 | 20677369 | . | + | . | gene_id "XLOC_013511"; transcript_id "TCONS_00022952"; exon_number "3"; oId "CUFF.23574.2"; tss_id "TSS17173"; |
| chr13 | Cufflinks exon | 21346672 | 21346824 | . | + | . | gene_id "XLOC_013515"; transcript_id "TCONS_00022962"; exon_number "1"; oId "CUFF.23591.1"; tss_id "TSS17178"; |
| chr13 | Cufflinks exon | 21347287 | 21350609 | . | + | . | gene_id "XLOC_013515"; transcript_id "TCONS_00022962"; exon_number "2"; oId "CUFF.23591.1"; tss_id "TSS17178"; |
| chr13 | Cufflinks exon | 21346673 | 21346824 | . | + | . | gene_id "XLOC_013515"; transcript_id "TCONS_00022963"; exon_number "1"; oId "CUFF.23591.2"; tss_id "TSS17178"; |
| chr13 | Cufflinks exon | 21347450 | 21350609 | . | + | . | gene_id "XLOC_013515"; transcript_id "TCONS_00022963"; exon_number "2"; oId "CUFF.23591.2"; tss_id "TSS17178"; |
| chr13 | Cufflinks exon | 21793077 | 21793239 | . | + | . | gene_id "XLOC_013519"; transcript_id "TCONS_00022973"; exon_number "1"; oId "CUFF.23613.3"; tss_id "TSS17182"; |
| chr13 | Cufflinks exon | 21798591 | 21799634 | . | + | . | gene_id "XLOC_013519"; transcript_id "TCONS_00022973"; exon_number "2"; oId "CUFF.23613.3"; tss_id "TSS17182"; |
| chr13 | Cufflinks exon | 21800118 | 21800167 | . | + | . | gene_id "XLOC_013519"; transcript_id "TCONS_00022973"; exon_number "3"; oId "CUFF.23613.3"; tss_id "TSS17182"; |
| chr13 | Cufflinks exon | 21806694 | 21806765 | . | + | . | gene_id "XLOC_013519"; transcript_id "TCONS_00022973"; exon_number "4"; oId "CUFF.23613.3"; tss_id "TSS17182"; |
| chr13 | Cufflinks exon | 21808628 | 21808792 | . | + | . | gene_id "XLOC_013519"; transcript_id "TCONS_00022973"; exon_number "5"; oId "CUFF.23613.3"; tss_id "TSS17182"; |
| chr13 | Cufflinks exon | 21809025 | 21809767 | . | + | . | gene_id "XLOC_013519"; transcript_id "TCONS_00022973"; exon_number "6"; oId "CUFF.23613.3"; tss_id "TSS17182"; |
| chr13 | Cufflinks exon | 21793077 | 21793239 | . | + | . | gene_id "XLOC_013519"; transcript_id "TCONS_00022975"; exon_number "1"; oId "CUFF.23613.6"; tss_id "TSS17182"; |
| chr13 | Cufflinks exon | 21798591 | 21799634 | . | + | . | gene_id "XLOC_013519"; transcript_id "TCONS_00022975"; exon_number "2"; oId "CUFF.23613.6"; tss_id "TSS17182"; |
| chr13 | Cufflinks exon | 21800118 | 21800167 | . | + | . | gene_id "XLOC_013519"; transcript_id "TCONS_00022975"; exon_number "3"; oId "CUFF.23613.6"; tss_id "TSS17182"; |
| chr13 | Cufflinks exon | 21806694 | 21806765 | . | + | . | gene_id "XLOC_013519"; transcript_id "TCONS_00022975"; exon_number "4"; oId "CUFF.23613.6"; tss_id "TSS17182"; |
| chr13 | Cufflinks exon | 21808618 | 21808792 | . | + | . | gene_id "XLOC_013519"; transcript_id "TCONS_00022975"; exon_number "5"; oId "CUFF.23613.6"; tss_id "TSS17182"; |
| chr13 | Cufflinks exon | 21809025 | 21809767 | . | + | . | gene_id "XLOC_013519"; transcript_id "TCONS_00022975"; exon_number "6"; oId "CUFF.23613.6"; tss_id "TSS17182"; |
| chr13 | Cufflinks exon | 21793077 | 21793239 | . | + | . | gene_id "XLOC_013519"; transcript_id "TCONS_00022974"; exon_number "1"; oId "CUFF.23613.5"; tss_id "TSS17182"; |
| chr13 | Cufflinks exon | 21798591 | 21799634 | . | + | . | gene_id "XLOC_013519"; transcript_id "TCONS_00022974"; exon_number "2"; oId "CUFF.23613.5"; tss_id "TSS17182"; |
| chr13 | Cufflinks exon | 21800118 | 21800167 | . | + | . | gene_id "XLOC_013519"; transcript_id "TCONS_00022974"; exon_number "3"; oId "CUFF.23613.5"; tss_id "TSS17182"; |





|       |                         |          |   |   |   |                                                                                                                |
|-------|-------------------------|----------|---|---|---|----------------------------------------------------------------------------------------------------------------|
| chr13 | Cufflinks exon22784424  | 22784567 | . | + | . | gene_id "XLOC_013532"; transcript_id "TCONS_00022997"; exon_number "1"; oId "CUFF.23666.4"; tss_id "TSS17202"; |
| chr13 | Cufflinks exon22848662  | 22850806 | . | + | . | gene_id "XLOC_013532"; transcript_id "TCONS_00022997"; exon_number "2"; oId "CUFF.23666.4"; tss_id "TSS17202"; |
| chr13 | Cufflinks exon30221526  | 30221615 | . | + | . | gene_id "XLOC_013596"; transcript_id "TCONS_00023104"; exon_number "1"; oId "CUFF.23887.1"; tss_id "TSS17288"; |
| chr13 | Cufflinks exon30229207  | 30229617 | . | + | . | gene_id "XLOC_013596"; transcript_id "TCONS_00023104"; exon_number "2"; oId "CUFF.23887.1"; tss_id "TSS17288"; |
| chr13 | Cufflinks exon30221575  | 30221861 | . | + | . | gene_id "XLOC_013596"; transcript_id "TCONS_00023105"; exon_number "1"; oId "CUFF.23887.2"; tss_id "TSS17288"; |
| chr13 | Cufflinks exon30229207  | 30229617 | . | + | . | gene_id "XLOC_013596"; transcript_id "TCONS_00023105"; exon_number "2"; oId "CUFF.23887.2"; tss_id "TSS17288"; |
| chr13 | Cufflinks exon37409542  | 37414478 | . | + | . | gene_id "XLOC_013664"; transcript_id "TCONS_00023209"; exon_number "1"; oId "CUFF.24144.2"; tss_id "TSS17364"; |
| chr13 | Cufflinks exon 37414799 | 37423719 | . | + | . | gene_id "XLOC_013664"; transcript_id "TCONS_00023209"; exon_number "2"; oId "CUFF.24144.2"; tss_id "TSS17364"; |
| chr13 | Cufflinks exon 39659347 | 39659391 | . | + | . | gene_id "XLOC_013673"; transcript_id "TCONS_00023221"; exon_number "1"; oId "CUFF.24185.1"; tss_id "TSS17373"; |
| chr13 | Cufflinks exon 39662919 | 39663311 | . | + | . | gene_id "XLOC_013673"; transcript_id "TCONS_00023221"; exon_number "2"; oId "CUFF.24185.1"; tss_id "TSS17373"; |
| chr13 | Cufflinks exon 42958038 | 42958059 | . | + | . | gene_id "XLOC_013691"; transcript_id "TCONS_00023253"; exon_number "1"; oId "CUFF.24341.1"; tss_id "TSS17399"; |
| chr13 | Cufflinks exon42958393  | 42958602 | . | + | . | gene_id "XLOC_013691"; transcript_id "TCONS_00023253"; exon_number "2"; oId "CUFF.24341.1"; tss_id "TSS17399"; |
| chr13 | Cufflinks exon43009336  | 43009429 | . | + | . | gene_id "XLOC_013691"; transcript_id "TCONS_00023253"; exon_number "3"; oId "CUFF.24341.1"; tss_id "TSS17399"; |
| chr13 | Cufflinks exon43011454  | 43011608 | . | + | . | gene_id "XLOC_013691"; transcript_id "TCONS_00023253"; exon_number "4"; oId "CUFF.24341.1"; tss_id "TSS17399"; |
| chr13 | Cufflinks exon43059605  | 43061158 | . | + | . | gene_id "XLOC_013691"; transcript_id "TCONS_00023253"; exon_number "5"; oId "CUFF.24341.1"; tss_id "TSS17399"; |
| chr13 | Cufflinks exon42961288  | 42961334 | . | + | . | gene_id "XLOC_013691"; transcript_id "TCONS_00023254"; exon_number "1"; oId "CUFF.24341.2"; tss_id "TSS17400"; |
| chr13 | Cufflinks exon42967878  | 42968739 | . | + | . | gene_id "XLOC_013691"; transcript_id "TCONS_00023254"; exon_number "2"; oId "CUFF.24341.2"; tss_id "TSS17400"; |
| chr13 | Cufflinks exon43009336  | 43009430 | . | + | . | gene_id "XLOC_013691"; transcript_id "TCONS_00023254"; exon_number "3"; oId "CUFF.24341.2"; tss_id "TSS17400"; |
| chr13 | Cufflinks exon43011455  | 43011608 | . | + | . | gene_id "XLOC_013691"; transcript_id "TCONS_00023254"; exon_number "4"; oId "CUFF.24341.2"; tss_id "TSS17400"; |
| chr13 | Cufflinks exon43018103  | 43018338 | . | + | . | gene_id "XLOC_013691"; transcript_id "TCONS_00023254"; exon_number "5"; oId "CUFF.24341.2"; tss_id "TSS17400"; |
| chr13 | Cufflinks exon42967472  | 42968739 | . | + | . | gene_id "XLOC_013691"; transcript_id "TCONS_00023255"; exon_number "1"; oId "CUFF.24341.3"; tss_id "TSS17401"; |
| chr13 | Cufflinks exon43009336  | 43009429 | . | + | . | gene_id "XLOC_013691"; transcript_id "TCONS_00023255"; exon_number "2"; oId "CUFF.24341.3"; tss_id "TSS17401"; |

"2"; oId "CUFF.24341.3"; tss\_id "TSS17401";  
chr13 Cufflinks exon43011454 43011608 . + . gene\_id "XLOC\_013691"; transcript\_id "TCONS\_00023255"; exon\_number  
"3"; oId "CUFF.24341.3"; tss\_id "TSS17401";  
chr13 Cufflinks exon43059605 43061158 . + . gene\_id "XLOC\_013691"; transcript\_id "TCONS\_00023255"; exon\_number  
"4"; oId "CUFF.24341.3"; tss\_id "TSS17401";  
chr13 Cufflinks exon42967595 42968739 . + . gene\_id "XLOC\_013691"; transcript\_id "TCONS\_00023256"; exon\_number  
"1"; oId "CUFF.24341.4"; tss\_id "TSS17402";  
chr13 Cufflinks exon43009336 43009429 . + . gene\_id "XLOC\_013691"; transcript\_id "TCONS\_00023256"; exon\_number  
"2"; oId "CUFF.24341.4"; tss\_id "TSS17402";  
chr13 Cufflinks exon43011454 43011879 . + . gene\_id "XLOC\_013691"; transcript\_id "TCONS\_00023256"; exon\_number  
"3"; oId "CUFF.24341.4"; tss\_id "TSS17402";  
chr13 Cufflinks exon42967663 42968739 . + . gene\_id "XLOC\_013691"; transcript\_id "TCONS\_00023257"; exon\_number  
"1"; oId "CUFF.24341.5"; tss\_id "TSS17402";  
chr13 Cufflinks exon42970561 42970662 . + . gene\_id "XLOC\_013691"; transcript\_id "TCONS\_00023257"; exon\_number  
"2"; oId "CUFF.24341.5"; tss\_id "TSS17402";  
chr13 Cufflinks exon43009336 43009431 . + . gene\_id "XLOC\_013691"; transcript\_id "TCONS\_00023257"; exon\_number  
"3"; oId "CUFF.24341.5"; tss\_id "TSS17402";  
chr13 Cufflinks exon43011456 43011879 . + . gene\_id "XLOC\_013691"; transcript\_id "TCONS\_00023257"; exon\_number  
"4"; oId "CUFF.24341.5"; tss\_id "TSS17402";  
chr13 Cufflinks exon43683893 43687419 . + . gene\_id "XLOC\_013695"; transcript\_id "TCONS\_00023264"; exon\_number  
"1"; oId "CUFF.24348.1"; tss\_id "TSS17407";  
chr13 Cufflinks exon43732769 43733141 . + . gene\_id "XLOC\_013695"; transcript\_id "TCONS\_00023264"; exon\_number  
"2"; oId "CUFF.24348.1"; tss\_id "TSS17407";  
chr13 Cufflinks exon43733431 43733602 . + . gene\_id "XLOC\_013695"; transcript\_id "TCONS\_00023264"; exon\_number  
"3"; oId "CUFF.24348.1"; tss\_id "TSS17407";  
chr13 Cufflinks exon44684685 44684748 . + . gene\_id "XLOC\_013699"; transcript\_id "TCONS\_00023271"; exon\_number  
"1"; oId "CUFF.24393.2"; tss\_id "TSS17412";  
chr13 Cufflinks exon44717693 44717873 . + . gene\_id "XLOC\_013699"; transcript\_id "TCONS\_00023271"; exon\_number  
"2"; oId "CUFF.24393.2"; tss\_id "TSS17412";  
chr13 Cufflinks exon44720918 44720991 . + . gene\_id "XLOC\_013699"; transcript\_id "TCONS\_00023271"; exon\_number  
"3"; oId "CUFF.24393.2"; tss\_id "TSS17412";  
chr13 Cufflinks exon44722074 44722212 . + . gene\_id "XLOC\_013699"; transcript\_id "TCONS\_00023271"; exon\_number  
"4"; oId "CUFF.24393.2"; tss\_id "TSS17412";  
chr13 Cufflinks exon44727783 44728211 . + . gene\_id "XLOC\_013699"; transcript\_id "TCONS\_00023271"; exon\_number  
"5"; oId "CUFF.24393.2"; tss\_id "TSS17412";  
chr13 Cufflinks exon44684685 44684748 . + . gene\_id "XLOC\_013699"; transcript\_id "TCONS\_00023272"; exon\_number  
"1"; oId "CUFF.24393.3"; tss\_id "TSS17412";  
chr13 Cufflinks exon44717693 44717873 . + . gene\_id "XLOC\_013699"; transcript\_id "TCONS\_00023272"; exon\_number  
"2"; oId "CUFF.24393.3"; tss\_id "TSS17412";  
chr13 Cufflinks exon44720918 44720991 . + . gene\_id "XLOC\_013699"; transcript\_id "TCONS\_00023272"; exon\_number  
"3"; oId "CUFF.24393.3"; tss\_id "TSS17412";  
chr13 Cufflinks exon44805417 44806570 . + . gene\_id "XLOC\_013699"; transcript\_id "TCONS\_00023272"; exon\_number  
"4"; oId "CUFF.24393.3"; tss\_id "TSS17412";

|       |                        |          |   |   |   |                                                                                                                |
|-------|------------------------|----------|---|---|---|----------------------------------------------------------------------------------------------------------------|
| chr13 | Cufflinks exon44684685 | 44684748 | . | + | . | gene_id "XLOC_013699"; transcript_id "TCONS_00023273"; exon_number "1"; oId "CUFF.24393.1"; tss_id "TSS17412"; |
| chr13 | Cufflinks exon44717693 | 44717873 | . | + | . | gene_id "XLOC_013699"; transcript_id "TCONS_00023273"; exon_number "2"; oId "CUFF.24393.1"; tss_id "TSS17412"; |
| chr13 | Cufflinks exon44720918 | 44720991 | . | + | . | gene_id "XLOC_013699"; transcript_id "TCONS_00023273"; exon_number "3"; oId "CUFF.24393.1"; tss_id "TSS17412"; |
| chr13 | Cufflinks exon44812964 | 44814597 | . | + | . | gene_id "XLOC_013699"; transcript_id "TCONS_00023273"; exon_number "4"; oId "CUFF.24393.1"; tss_id "TSS17412"; |
| chr13 | Cufflinks exon44716399 | 44716832 | . | + | . | gene_id "XLOC_013699"; transcript_id "TCONS_00023274"; exon_number "1"; oId "CUFF.24393.4"; tss_id "TSS17413"; |
| chr13 | Cufflinks exon44717693 | 44717873 | . | + | . | gene_id "XLOC_013699"; transcript_id "TCONS_00023274"; exon_number "2"; oId "CUFF.24393.4"; tss_id "TSS17413"; |
| chr13 | Cufflinks exon44720918 | 44720991 | . | + | . | gene_id "XLOC_013699"; transcript_id "TCONS_00023274"; exon_number "3"; oId "CUFF.24393.4"; tss_id "TSS17413"; |
| chr13 | Cufflinks exon44784006 | 44784145 | . | + | . | gene_id "XLOC_013699"; transcript_id "TCONS_00023274"; exon_number "4"; oId "CUFF.24393.4"; tss_id "TSS17413"; |
| chr13 | Cufflinks exon44716460 | 44716832 | . | + | . | gene_id "XLOC_013699"; transcript_id "TCONS_00023275"; exon_number "1"; oId "CUFF.24393.5"; tss_id "TSS17413"; |
| chr13 | Cufflinks exon44717693 | 44717873 | . | + | . | gene_id "XLOC_013699"; transcript_id "TCONS_00023275"; exon_number "2"; oId "CUFF.24393.5"; tss_id "TSS17413"; |
| chr13 | Cufflinks exon44720918 | 44720991 | . | + | . | gene_id "XLOC_013699"; transcript_id "TCONS_00023275"; exon_number "3"; oId "CUFF.24393.5"; tss_id "TSS17413"; |
| chr13 | Cufflinks exon44765125 | 44765321 | . | + | . | gene_id "XLOC_013699"; transcript_id "TCONS_00023275"; exon_number "4"; oId "CUFF.24393.5"; tss_id "TSS17413"; |
| chr13 | Cufflinks exon44716464 | 44716832 | . | + | . | gene_id "XLOC_013699"; transcript_id "TCONS_00023276"; exon_number "1"; oId "CUFF.24393.6"; tss_id "TSS17413"; |
| chr13 | Cufflinks exon44717693 | 44717873 | . | + | . | gene_id "XLOC_013699"; transcript_id "TCONS_00023276"; exon_number "2"; oId "CUFF.24393.6"; tss_id "TSS17413"; |
| chr13 | Cufflinks exon44720918 | 44720991 | . | + | . | gene_id "XLOC_013699"; transcript_id "TCONS_00023276"; exon_number "3"; oId "CUFF.24393.6"; tss_id "TSS17413"; |
| chr13 | Cufflinks exon44722074 | 44722212 | . | + | . | gene_id "XLOC_013699"; transcript_id "TCONS_00023276"; exon_number "4"; oId "CUFF.24393.6"; tss_id "TSS17413"; |
| chr13 | Cufflinks exon44727783 | 44728211 | . | + | . | gene_id "XLOC_013699"; transcript_id "TCONS_00023276"; exon_number "5"; oId "CUFF.24393.6"; tss_id "TSS17413"; |
| chr13 | Cufflinks exon45870869 | 45871267 | . | + | . | gene_id "XLOC_013710"; transcript_id "TCONS_00023291"; exon_number "1"; oId "CUFF.24448.2"; tss_id "TSS17425"; |
| chr13 | Cufflinks exon45872307 | 45876422 | . | + | . | gene_id "XLOC_013710"; transcript_id "TCONS_00023291"; exon_number "2"; oId "CUFF.24448.2"; tss_id "TSS17425"; |
| chr13 | Cufflinks exon45915585 | 45915749 | . | + | . | gene_id "XLOC_013711"; transcript_id "TCONS_00023292"; exon_number "1"; oId "CUFF.24444.2"; tss_id "TSS17426"; |
| chr13 | Cufflinks exon45944094 | 45944317 | . | + | . | gene_id "XLOC_013711"; transcript_id "TCONS_00023292"; exon_number "2"; oId "CUFF.24444.2"; tss_id "TSS17426"; |
| chr13 | Cufflinks exon45951196 | 45951350 | . | + | . | gene_id "XLOC_013711"; transcript_id "TCONS_00023292"; exon_number "3"; oId "CUFF.24444.2"; tss_id "TSS17426"; |

|                                              |   |   |   |                                                                    |  |
|----------------------------------------------|---|---|---|--------------------------------------------------------------------|--|
| "3"; oId "CUFF.24444.2"; tss_id "TSS17426";  |   |   |   |                                                                    |  |
| chr13 Cufflinks exon45952665 45952806        | . | + | . | gene_id "XLOC_013711"; transcript_id "TCONS_00023292"; exon_number |  |
| "4"; oId "CUFF.24444.2"; tss_id "TSS17426";  |   |   |   |                                                                    |  |
| chr13 Cufflinks exon45953330 45953470        | . | + | . | gene_id "XLOC_013711"; transcript_id "TCONS_00023292"; exon_number |  |
| "5"; oId "CUFF.24444.2"; tss_id "TSS17426";  |   |   |   |                                                                    |  |
| chr13 Cufflinks exon45955277 45955350        | . | + | . | gene_id "XLOC_013711"; transcript_id "TCONS_00023292"; exon_number |  |
| "6"; oId "CUFF.24444.2"; tss_id "TSS17426";  |   |   |   |                                                                    |  |
| chr13 Cufflinks exon45957224 45957370        | . | + | . | gene_id "XLOC_013711"; transcript_id "TCONS_00023292"; exon_number |  |
| "7"; oId "CUFF.24444.2"; tss_id "TSS17426";  |   |   |   |                                                                    |  |
| chr13 Cufflinks exon45963870 45963956        | . | + | . | gene_id "XLOC_013711"; transcript_id "TCONS_00023292"; exon_number |  |
| "8"; oId "CUFF.24444.2"; tss_id "TSS17426";  |   |   |   |                                                                    |  |
| chr13 Cufflinks exon45964849 45965037        | . | + | . | gene_id "XLOC_013711"; transcript_id "TCONS_00023292"; exon_number |  |
| "9"; oId "CUFF.24444.2"; tss_id "TSS17426";  |   |   |   |                                                                    |  |
| chr13 Cufflinks exon45965167 45966199        | . | + | . | gene_id "XLOC_013711"; transcript_id "TCONS_00023292"; exon_number |  |
| "10"; oId "CUFF.24444.2"; tss_id "TSS17426"; |   |   |   |                                                                    |  |
| chr13 Cufflinks exon45924284 45924709        | . | + | . | gene_id "XLOC_013714"; transcript_id "TCONS_00023295"; exon_number |  |
| "1"; oId "CUFF.24456.1"; tss_id "TSS17429";  |   |   |   |                                                                    |  |
| chr13 Cufflinks exon45933805 45934142        | . | + | . | gene_id "XLOC_013714"; transcript_id "TCONS_00023295"; exon_number |  |
| "2"; oId "CUFF.24456.1"; tss_id "TSS17429";  |   |   |   |                                                                    |  |
| chr13 Cufflinks exon46626959 46627100        | . | + | . | gene_id "XLOC_013728"; transcript_id "TCONS_00023314"; exon_number |  |
| "1"; oId "CUFF.24490.3"; tss_id "TSS17445";  |   |   |   |                                                                    |  |
| chr13 Cufflinks exon46668988 46669137        | . | + | . | gene_id "XLOC_013728"; transcript_id "TCONS_00023314"; exon_number |  |
| "2"; oId "CUFF.24490.3"; tss_id "TSS17445";  |   |   |   |                                                                    |  |
| chr13 Cufflinks exon46672533 46672916        | . | + | . | gene_id "XLOC_013728"; transcript_id "TCONS_00023314"; exon_number |  |
| "3"; oId "CUFF.24490.3"; tss_id "TSS17445";  |   |   |   |                                                                    |  |
| chr13 Cufflinks exon46678990 46680005        | . | + | . | gene_id "XLOC_013728"; transcript_id "TCONS_00023314"; exon_number |  |
| "4"; oId "CUFF.24490.3"; tss_id "TSS17445";  |   |   |   |                                                                    |  |
| chr13 Cufflinks exon49220490 49220534        | . | + | . | gene_id "XLOC_013751"; transcript_id "TCONS_00023339"; exon_number |  |
| "1"; oId "CUFF.24628.1"; tss_id "TSS17469";  |   |   |   |                                                                    |  |
| chr13 Cufflinks exon49221831 49225553        | . | + | . | gene_id "XLOC_013751"; transcript_id "TCONS_00023339"; exon_number |  |
| "2"; oId "CUFF.24628.1"; tss_id "TSS17469";  |   |   |   |                                                                    |  |
| chr13 Cufflinks exon49220493 49220534        | . | + | . | gene_id "XLOC_013751"; transcript_id "TCONS_00023341"; exon_number |  |
| "1"; oId "CUFF.24628.3"; tss_id "TSS17469";  |   |   |   |                                                                    |  |
| chr13 Cufflinks exon49221015 49221173        | . | + | . | gene_id "XLOC_013751"; transcript_id "TCONS_00023341"; exon_number |  |
| "2"; oId "CUFF.24628.3"; tss_id "TSS17469";  |   |   |   |                                                                    |  |
| chr13 Cufflinks exon49221831 49225553        | . | + | . | gene_id "XLOC_013751"; transcript_id "TCONS_00023341"; exon_number |  |
| "3"; oId "CUFF.24628.3"; tss_id "TSS17469";  |   |   |   |                                                                    |  |
| chr13 Cufflinks exon50656305 50656693        | . | + | . | gene_id "XLOC_013779"; transcript_id "TCONS_00023387"; exon_number |  |
| "1"; oId "CUFF.24741.2"; tss_id "TSS17505";  |   |   |   |                                                                    |  |
| chr13 Cufflinks exon50678840 50681354        | . | + | . | gene_id "XLOC_013779"; transcript_id "TCONS_00023387"; exon_number |  |
| "2"; oId "CUFF.24741.2"; tss_id "TSS17505";  |   |   |   |                                                                    |  |
| chr13 Cufflinks exon50656305 50656693        | . | + | . | gene_id "XLOC_013779"; transcript_id "TCONS_00023386"; exon_number |  |
| "1"; oId "CUFF.24741.1"; tss_id "TSS17505";  |   |   |   |                                                                    |  |

|       |                        |          |   |   |   |                                                                                                                 |
|-------|------------------------|----------|---|---|---|-----------------------------------------------------------------------------------------------------------------|
| chr13 | Cufflinks exon50657278 | 50657330 | . | + | . | gene_id "XLOC_013779"; transcript_id "TCONS_00023386"; exon_number "2"; oId "CUFF.24741.1"; tss_id "TSS17505";  |
| chr13 | Cufflinks exon50678840 | 50681354 | . | + | . | gene_id "XLOC_013779"; transcript_id "TCONS_00023386"; exon_number "3"; oId "CUFF.24741.1"; tss_id "TSS17505";  |
| chr13 | Cufflinks exon51310781 | 51310810 | . | + | . | gene_id "XLOC_013798"; transcript_id "TCONS_00023406"; exon_number "1"; oId "CUFF.24812.1"; tss_id "TSS17524";  |
| chr13 | Cufflinks exon51546556 | 51548518 | . | + | . | gene_id "XLOC_013798"; transcript_id "TCONS_00023406"; exon_number "2"; oId "CUFF.24812.1"; tss_id "TSS17524";  |
| chr13 | Cufflinks exon51381991 | 51382122 | . | + | . | gene_id "XLOC_013806"; transcript_id "TCONS_00023414"; exon_number "1"; oId "CUFF.24829.1"; tss_id "TSS17532";  |
| chr13 | Cufflinks exon51382676 | 51382842 | . | + | . | gene_id "XLOC_013806"; transcript_id "TCONS_00023414"; exon_number "2"; oId "CUFF.24829.1"; tss_id "TSS17532";  |
| chr13 | Cufflinks exon51392657 | 51392728 | . | + | . | gene_id "XLOC_013806"; transcript_id "TCONS_00023414"; exon_number "3"; oId "CUFF.24829.1"; tss_id "TSS17532";  |
| chr13 | Cufflinks exon51414164 | 51414230 | . | + | . | gene_id "XLOC_013806"; transcript_id "TCONS_00023414"; exon_number "4"; oId "CUFF.24829.1"; tss_id "TSS17532";  |
| chr13 | Cufflinks exon51422673 | 51424041 | . | + | . | gene_id "XLOC_013806"; transcript_id "TCONS_00023414"; exon_number "5"; oId "CUFF.24829.1"; tss_id "TSS17532";  |
| chr13 | Cufflinks exon52027481 | 52027554 | . | + | . | gene_id "XLOC_013822"; transcript_id "TCONS_00023438"; exon_number "1"; oId "CUFF.24887.8"; tss_id "TSS17548";  |
| chr13 | Cufflinks exon52028139 | 52030294 | . | + | . | gene_id "XLOC_013822"; transcript_id "TCONS_00023438"; exon_number "2"; oId "CUFF.24887.8"; tss_id "TSS17548";  |
| chr13 | Cufflinks exon52027481 | 52028465 | . | + | . | gene_id "XLOC_013822"; transcript_id "TCONS_00023441"; exon_number "1"; oId "CUFF.24887.5"; tss_id "TSS17548";  |
| chr13 | Cufflinks exon52034621 | 52039122 | . | + | . | gene_id "XLOC_013822"; transcript_id "TCONS_00023441"; exon_number "2"; oId "CUFF.24887.5"; tss_id "TSS17548";  |
| chr13 | Cufflinks exon52027481 | 52028465 | . | + | . | gene_id "XLOC_013822"; transcript_id "TCONS_00023440"; exon_number "1"; oId "CUFF.24887.4"; tss_id "TSS17548";  |
| chr13 | Cufflinks exon52034808 | 52039122 | . | + | . | gene_id "XLOC_013822"; transcript_id "TCONS_00023440"; exon_number "2"; oId "CUFF.24887.4"; tss_id "TSS17548";  |
| chr13 | Cufflinks exon52027481 | 52028348 | . | + | . | gene_id "XLOC_013822"; transcript_id "TCONS_00023439"; exon_number "1"; oId "CUFF.24887.3"; tss_id "TSS17548";  |
| chr13 | Cufflinks exon52034621 | 52039122 | . | + | . | gene_id "XLOC_013822"; transcript_id "TCONS_00023439"; exon_number "2"; oId "CUFF.24887.3"; tss_id "TSS17548";  |
| chr13 | Cufflinks exon52027481 | 52028465 | . | + | . | gene_id "XLOC_013822"; transcript_id "TCONS_00023442"; exon_number "1"; oId "CUFF.24887.2"; tss_id "TSS17548";  |
| chr13 | Cufflinks exon52041644 | 52041743 | . | + | . | gene_id "XLOC_013822"; transcript_id "TCONS_00023442"; exon_number "2"; oId "CUFF.24887.2"; tss_id "TSS17548";  |
| chr13 | Cufflinks exon52027481 | 52028465 | . | + | . | gene_id "XLOC_013822"; transcript_id "TCONS_00023443"; exon_number "1"; oId "CUFF.24887.10"; tss_id "TSS17548"; |
| chr13 | Cufflinks exon52036402 | 52036555 | . | + | . | gene_id "XLOC_013822"; transcript_id "TCONS_00023443"; exon_number "2"; oId "CUFF.24887.10"; tss_id "TSS17548"; |
| chr13 | Cufflinks exon52042404 | 52042503 | . | + | . | gene_id "XLOC_013822"; transcript_id "TCONS_00023443"; exon_number "1"; oId "CUFF.24887.10"; tss_id "TSS17548"; |



|       |                        |          |   |   |   |                                                                                                                |
|-------|------------------------|----------|---|---|---|----------------------------------------------------------------------------------------------------------------|
| chr13 | Cufflinks exon71335094 | 71335211 | . | + | . | gene_id "XLOC_013867"; transcript_id "TCONS_00023510"; exon_number "4"; oId "CUFF.25075.4"; tss_id "TSS17605"; |
| chr13 | Cufflinks exon71336608 | 71336705 | . | + | . | gene_id "XLOC_013867"; transcript_id "TCONS_00023510"; exon_number "5"; oId "CUFF.25075.4"; tss_id "TSS17605"; |
| chr13 | Cufflinks exon71359633 | 71360320 | . | + | . | gene_id "XLOC_013867"; transcript_id "TCONS_00023510"; exon_number "6"; oId "CUFF.25075.4"; tss_id "TSS17605"; |
| chr13 | Cufflinks exon79980444 | 79980612 | . | + | . | gene_id "XLOC_013911"; transcript_id "TCONS_00023573"; exon_number "1"; oId "CUFF.25195.1"; tss_id "TSS17660"; |
| chr13 | Cufflinks exon79986817 | 79987042 | . | + | . | gene_id "XLOC_013911"; transcript_id "TCONS_00023573"; exon_number "2"; oId "CUFF.25195.1"; tss_id "TSS17660"; |
| chr13 | Cufflinks exon79989397 | 79989499 | . | + | . | gene_id "XLOC_013911"; transcript_id "TCONS_00023573"; exon_number "3"; oId "CUFF.25195.1"; tss_id "TSS17660"; |
| chr13 | Cufflinks exon79991970 | 79992051 | . | + | . | gene_id "XLOC_013911"; transcript_id "TCONS_00023573"; exon_number "4"; oId "CUFF.25195.1"; tss_id "TSS17660"; |
| chr13 | Cufflinks exon79994895 | 79994950 | . | + | . | gene_id "XLOC_013911"; transcript_id "TCONS_00023573"; exon_number "5"; oId "CUFF.25195.1"; tss_id "TSS17660"; |
| chr13 | Cufflinks exon79996122 | 79996349 | . | + | . | gene_id "XLOC_013911"; transcript_id "TCONS_00023573"; exon_number "6"; oId "CUFF.25195.1"; tss_id "TSS17660"; |
| chr13 | Cufflinks exon79996862 | 79998468 | . | + | . | gene_id "XLOC_013911"; transcript_id "TCONS_00023573"; exon_number "7"; oId "CUFF.25195.1"; tss_id "TSS17660"; |
| chr13 | Cufflinks exon82239116 | 82239177 | . | + | . | gene_id "XLOC_013920"; transcript_id "TCONS_00023584"; exon_number "1"; oId "CUFF.25221.1"; tss_id "TSS17669"; |
| chr13 | Cufflinks exon82264210 | 82265245 | . | + | . | gene_id "XLOC_013920"; transcript_id "TCONS_00023584"; exon_number "2"; oId "CUFF.25221.1"; tss_id "TSS17669"; |
| chr13 | Cufflinks exon91999953 | 92000213 | . | + | . | gene_id "XLOC_013940"; transcript_id "TCONS_00023609"; exon_number "1"; oId "CUFF.25285.3"; tss_id "TSS17692"; |
| chr13 | Cufflinks exon92001952 | 92002024 | . | + | . | gene_id "XLOC_013940"; transcript_id "TCONS_00023609"; exon_number "2"; oId "CUFF.25285.3"; tss_id "TSS17692"; |
| chr13 | Cufflinks exon92002410 | 92016445 | . | + | . | gene_id "XLOC_013940"; transcript_id "TCONS_00023609"; exon_number "3"; oId "CUFF.25285.3"; tss_id "TSS17692"; |
| chr13 | Cufflinks exon91999953 | 92000213 | . | + | . | gene_id "XLOC_013940"; transcript_id "TCONS_00023610"; exon_number "1"; oId "CUFF.25285.4"; tss_id "TSS17692"; |
| chr13 | Cufflinks exon92001952 | 92002024 | . | + | . | gene_id "XLOC_013940"; transcript_id "TCONS_00023610"; exon_number "2"; oId "CUFF.25285.4"; tss_id "TSS17692"; |
| chr13 | Cufflinks exon92002410 | 92002480 | . | + | . | gene_id "XLOC_013940"; transcript_id "TCONS_00023610"; exon_number "3"; oId "CUFF.25285.4"; tss_id "TSS17692"; |
| chr13 | Cufflinks exon92004846 | 92016445 | . | + | . | gene_id "XLOC_013940"; transcript_id "TCONS_00023610"; exon_number "4"; oId "CUFF.25285.4"; tss_id "TSS17692"; |
| chr13 | Cufflinks exon91999953 | 92000213 | . | + | . | gene_id "XLOC_013940"; transcript_id "TCONS_00023608"; exon_number "1"; oId "CUFF.25285.2"; tss_id "TSS17692"; |
| chr13 | Cufflinks exon92001952 | 92002024 | . | + | . | gene_id "XLOC_013940"; transcript_id "TCONS_00023608"; exon_number "2"; oId "CUFF.25285.2"; tss_id "TSS17692"; |
| chr13 | Cufflinks exon92005043 | 92016445 | . | + | . | gene_id "XLOC_013940"; transcript_id "TCONS_00023608"; exon_number "3"; oId "CUFF.25285.2"; tss_id "TSS17692"; |





|       |                         |           |   |   |   |                                                                                                                |
|-------|-------------------------|-----------|---|---|---|----------------------------------------------------------------------------------------------------------------|
| chr13 | Cufflinks exon111474462 | 111474894 | . | + | . | gene_id "XLOC_014037"; transcript_id "TCONS_00023762"; exon_number "1"; oId "CUFF.25759.3"; tss_id "TSS17811"; |
| chr13 | Cufflinks exon111477210 | 111478947 | . | + | . | gene_id "XLOC_014037"; transcript_id "TCONS_00023762"; exon_number "2"; oId "CUFF.25759.3"; tss_id "TSS17811"; |
| chr13 | Cufflinks exon111490563 | 111491563 | . | + | . | gene_id "XLOC_014037"; transcript_id "TCONS_00023762"; exon_number "3"; oId "CUFF.25759.3"; tss_id "TSS17811"; |
| chr13 | Cufflinks exon111618374 | 111618466 | . | + | . | gene_id "XLOC_014043"; transcript_id "TCONS_00023769"; exon_number "1"; oId "CUFF.25775.1"; tss_id "TSS17817"; |
| chr13 | Cufflinks exon111642327 | 111642949 | . | + | . | gene_id "XLOC_014043"; transcript_id "TCONS_00023769"; exon_number "2"; oId "CUFF.25775.1"; tss_id "TSS17817"; |
| chr13 | Cufflinks exon112025215 | 112025315 | . | + | . | gene_id "XLOC_014053"; transcript_id "TCONS_00023784"; exon_number "1"; oId "CUFF.25789.1"; tss_id "TSS17831"; |
| chr13 | Cufflinks exon112063464 | 112063826 | . | + | . | gene_id "XLOC_014053"; transcript_id "TCONS_00023784"; exon_number "2"; oId "CUFF.25789.1"; tss_id "TSS17831"; |
| chr13 | Cufflinks exon112103299 | 112105411 | . | + | . | gene_id "XLOC_014053"; transcript_id "TCONS_00023784"; exon_number "3"; oId "CUFF.25789.1"; tss_id "TSS17831"; |
| chr13 | Cufflinks exon112025246 | 112025315 | . | + | . | gene_id "XLOC_014053"; transcript_id "TCONS_00023785"; exon_number "1"; oId "CUFF.25789.2"; tss_id "TSS17831"; |
| chr13 | Cufflinks exon112103299 | 112105411 | . | + | . | gene_id "XLOC_014053"; transcript_id "TCONS_00023785"; exon_number "2"; oId "CUFF.25789.2"; tss_id "TSS17831"; |
| chr13 | Cufflinks exon112517168 | 112519696 | . | + | . | gene_id "XLOC_014058"; transcript_id "TCONS_00023790"; exon_number "1"; oId "CUFF.25796.1"; tss_id "TSS17836"; |
| chr13 | Cufflinks exon112742360 | 112742574 | . | + | . | gene_id "XLOC_014058"; transcript_id "TCONS_00023790"; exon_number "2"; oId "CUFF.25796.1"; tss_id "TSS17836"; |
| chr13 | Cufflinks exon112749789 | 112749945 | . | + | . | gene_id "XLOC_014058"; transcript_id "TCONS_00023790"; exon_number "3"; oId "CUFF.25796.1"; tss_id "TSS17836"; |
| chr13 | Cufflinks exon112752630 | 112752788 | . | + | . | gene_id "XLOC_014058"; transcript_id "TCONS_00023790"; exon_number "4"; oId "CUFF.25796.1"; tss_id "TSS17836"; |
| chr13 | Cufflinks exon112762026 | 112762329 | . | + | . | gene_id "XLOC_014058"; transcript_id "TCONS_00023790"; exon_number "5"; oId "CUFF.25796.1"; tss_id "TSS17836"; |
| chr13 | Cufflinks exon112517220 | 112519696 | . | + | . | gene_id "XLOC_014058"; transcript_id "TCONS_00023791"; exon_number "1"; oId "CUFF.25796.2"; tss_id "TSS17836"; |
| chr13 | Cufflinks exon112563374 | 112563428 | . | + | . | gene_id "XLOC_014058"; transcript_id "TCONS_00023791"; exon_number "2"; oId "CUFF.25796.2"; tss_id "TSS17836"; |
| chr13 | Cufflinks exon112518389 | 112519696 | . | + | . | gene_id "XLOC_014058"; transcript_id "TCONS_00023792"; exon_number "1"; oId "CUFF.25796.3"; tss_id "TSS17837"; |
| chr13 | Cufflinks exon112749789 | 112749945 | . | + | . | gene_id "XLOC_014058"; transcript_id "TCONS_00023792"; exon_number "2"; oId "CUFF.25796.3"; tss_id "TSS17837"; |
| chr13 | Cufflinks exon112752630 | 112752788 | . | + | . | gene_id "XLOC_014058"; transcript_id "TCONS_00023792"; exon_number "3"; oId "CUFF.25796.3"; tss_id "TSS17837"; |
| chr13 | Cufflinks exon112757143 | 112757249 | . | + | . | gene_id "XLOC_014058"; transcript_id "TCONS_00023792"; exon_number "4"; oId "CUFF.25796.3"; tss_id "TSS17837"; |
| chr13 | Cufflinks exon112758269 | 112759248 | . | + | . | gene_id "XLOC_014058"; transcript_id "TCONS_00023792"; exon_number "5"; oId "CUFF.25796.3"; tss_id "TSS17837"; |

|                                              |   |   |   |                                                                    |  |
|----------------------------------------------|---|---|---|--------------------------------------------------------------------|--|
| "5"; oId "CUFF.25796.3"; tss_id "TSS17837";  |   |   |   |                                                                    |  |
| chr13 Cufflinks exon112626624 112626707      | . | + | . | gene_id "XLOC_014058"; transcript_id "TCONS_00023795"; exon_number |  |
| "1"; oId "CUFF.25796.4"; tss_id "TSS17838";  |   |   |   |                                                                    |  |
| chr13 Cufflinks exon112749789 112749945      | . | + | . | gene_id "XLOC_014058"; transcript_id "TCONS_00023795"; exon_number |  |
| "2"; oId "CUFF.25796.4"; tss_id "TSS17838";  |   |   |   |                                                                    |  |
| chr13 Cufflinks exon112752630 112752788      | . | + | . | gene_id "XLOC_014058"; transcript_id "TCONS_00023795"; exon_number |  |
| "3"; oId "CUFF.25796.4"; tss_id "TSS17838";  |   |   |   |                                                                    |  |
| chr13 Cufflinks exon112762026 112762329      | . | + | . | gene_id "XLOC_014058"; transcript_id "TCONS_00023795"; exon_number |  |
| "4"; oId "CUFF.25796.4"; tss_id "TSS17838";  |   |   |   |                                                                    |  |
| chr13 Cufflinks exon112759964 112761673      | . | + | . | gene_id "XLOC_014058"; transcript_id "TCONS_00023797"; exon_number |  |
| "1"; oId "CUFF.25796.5"; tss_id "TSS17839";  |   |   |   |                                                                    |  |
| chr13 Cufflinks exon112762026 112762329      | . | + | . | gene_id "XLOC_014058"; transcript_id "TCONS_00023797"; exon_number |  |
| "2"; oId "CUFF.25796.5"; tss_id "TSS17839";  |   |   |   |                                                                    |  |
| chr13 Cufflinks exon22224040 22224506        | . | - | . | gene_id "XLOC_014146"; transcript_id "TCONS_00023961"; exon_number |  |
| "1"; oId "CUFF.23657.3"; tss_id "TSS17958";  |   |   |   |                                                                    |  |
| chr13 Cufflinks exon22225443 22225804        | . | - | . | gene_id "XLOC_014146"; transcript_id "TCONS_00023961"; exon_number |  |
| "2"; oId "CUFF.23657.3"; tss_id "TSS17958";  |   |   |   |                                                                    |  |
| chr13 Cufflinks exon22244736 22245165        | . | - | . | gene_id "XLOC_014146"; transcript_id "TCONS_00023961"; exon_number |  |
| "3"; oId "CUFF.23657.3"; tss_id "TSS17958";  |   |   |   |                                                                    |  |
| chr13 Cufflinks exon22224040 22224293        | . | - | . | gene_id "XLOC_014146"; transcript_id "TCONS_00023960"; exon_number |  |
| "1"; oId "CUFF.23657.1"; tss_id "TSS17958";  |   |   |   |                                                                    |  |
| chr13 Cufflinks exon22225443 22225804        | . | - | . | gene_id "XLOC_014146"; transcript_id "TCONS_00023960"; exon_number |  |
| "2"; oId "CUFF.23657.1"; tss_id "TSS17958";  |   |   |   |                                                                    |  |
| chr13 Cufflinks exon22244736 22244854        | . | - | . | gene_id "XLOC_014146"; transcript_id "TCONS_00023960"; exon_number |  |
| "3"; oId "CUFF.23657.1"; tss_id "TSS17958";  |   |   |   |                                                                    |  |
| chr13 Cufflinks exon22244956 22245165        | . | - | . | gene_id "XLOC_014146"; transcript_id "TCONS_00023960"; exon_number |  |
| "4"; oId "CUFF.23657.1"; tss_id "TSS17958";  |   |   |   |                                                                    |  |
| chr13 Cufflinks exon27810185 27810724        | . | - | . | gene_id "XLOC_014187"; transcript_id "TCONS_00024020"; exon_number |  |
| "1"; oId "CUFF.23787.12"; tss_id "TSS18008"; |   |   |   |                                                                    |  |
| chr13 Cufflinks exon27810835 27810996        | . | - | . | gene_id "XLOC_014187"; transcript_id "TCONS_00024020"; exon_number |  |
| "2"; oId "CUFF.23787.12"; tss_id "TSS18008"; |   |   |   |                                                                    |  |
| chr13 Cufflinks exon27819898 27819998        | . | - | . | gene_id "XLOC_014187"; transcript_id "TCONS_00024020"; exon_number |  |
| "3"; oId "CUFF.23787.12"; tss_id "TSS18008"; |   |   |   |                                                                    |  |
| chr13 Cufflinks exon27824768 27824845        | . | - | . | gene_id "XLOC_014187"; transcript_id "TCONS_00024020"; exon_number |  |
| "4"; oId "CUFF.23787.12"; tss_id "TSS18008"; |   |   |   |                                                                    |  |
| chr13 Cufflinks exon27825357 27825395        | . | - | . | gene_id "XLOC_014187"; transcript_id "TCONS_00024020"; exon_number |  |
| "5"; oId "CUFF.23787.12"; tss_id "TSS18008"; |   |   |   |                                                                    |  |
| chr13 Cufflinks exon27810185 27810995        | . | - | . | gene_id "XLOC_014187"; transcript_id "TCONS_00024021"; exon_number |  |
| "1"; oId "CUFF.23787.11"; tss_id "TSS18008"; |   |   |   |                                                                    |  |
| chr13 Cufflinks exon27824768 27825415        | . | - | . | gene_id "XLOC_014187"; transcript_id "TCONS_00024021"; exon_number |  |
| "2"; oId "CUFF.23787.11"; tss_id "TSS18008"; |   |   |   |                                                                    |  |
| chr13 Cufflinks exon28393243 28394321        | . | - | . | gene_id "XLOC_014197"; transcript_id "TCONS_00024031"; exon_number |  |
| "1"; oId "CUFF.23829.2"; tss_id "TSS18018";  |   |   |   |                                                                    |  |

|       |                |          |          |   |   |   |                                                                                                                |
|-------|----------------|----------|----------|---|---|---|----------------------------------------------------------------------------------------------------------------|
| chr13 | Cufflinks exon | 28396892 | 28396968 | . | - | . | gene_id "XLOC_014197"; transcript_id "TCONS_00024031"; exon_number "2"; oId "CUFF.23829.2"; tss_id "TSS18018"; |
| chr13 | Cufflinks exon | 28408231 | 28408287 | . | - | . | gene_id "XLOC_014197"; transcript_id "TCONS_00024031"; exon_number "3"; oId "CUFF.23829.2"; tss_id "TSS18018"; |
| chr13 | Cufflinks exon | 28422145 | 28422673 | . | - | . | gene_id "XLOC_014197"; transcript_id "TCONS_00024031"; exon_number "4"; oId "CUFF.23829.2"; tss_id "TSS18018"; |
| chr13 | Cufflinks exon | 28495301 | 28495606 | . | - | . | gene_id "XLOC_014197"; transcript_id "TCONS_00024031"; exon_number "5"; oId "CUFF.23829.2"; tss_id "TSS18018"; |
| chr13 | Cufflinks exon | 28393243 | 28394321 | . | - | . | gene_id "XLOC_014197"; transcript_id "TCONS_00024032"; exon_number "1"; oId "CUFF.23829.1"; tss_id "TSS18019"; |
| chr13 | Cufflinks exon | 28394436 | 28394604 | . | - | . | gene_id "XLOC_014197"; transcript_id "TCONS_00024032"; exon_number "2"; oId "CUFF.23829.1"; tss_id "TSS18019"; |
| chr13 | Cufflinks exon | 28396892 | 28396968 | . | - | . | gene_id "XLOC_014197"; transcript_id "TCONS_00024032"; exon_number "3"; oId "CUFF.23829.1"; tss_id "TSS18019"; |
| chr13 | Cufflinks exon | 28408158 | 28408287 | . | - | . | gene_id "XLOC_014197"; transcript_id "TCONS_00024032"; exon_number "4"; oId "CUFF.23829.1"; tss_id "TSS18019"; |
| chr13 | Cufflinks exon | 28422145 | 28422673 | . | - | . | gene_id "XLOC_014197"; transcript_id "TCONS_00024032"; exon_number "5"; oId "CUFF.23829.1"; tss_id "TSS18019"; |
| chr13 | Cufflinks exon | 28495301 | 28495865 | . | - | . | gene_id "XLOC_014197"; transcript_id "TCONS_00024032"; exon_number "6"; oId "CUFF.23829.1"; tss_id "TSS18019"; |
| chr13 | Cufflinks exon | 28403278 | 28404420 | . | - | . | gene_id "XLOC_014197"; transcript_id "TCONS_00024037"; exon_number "1"; oId "CUFF.23829.3"; tss_id "TSS18020"; |
| chr13 | Cufflinks exon | 28407581 | 28408287 | . | - | . | gene_id "XLOC_014197"; transcript_id "TCONS_00024037"; exon_number "2"; oId "CUFF.23829.3"; tss_id "TSS18020"; |
| chr13 | Cufflinks exon | 28414293 | 28414463 | . | - | . | gene_id "XLOC_014197"; transcript_id "TCONS_00024037"; exon_number "3"; oId "CUFF.23829.3"; tss_id "TSS18020"; |
| chr13 | Cufflinks exon | 28421903 | 28422054 | . | - | . | gene_id "XLOC_014197"; transcript_id "TCONS_00024037"; exon_number "4"; oId "CUFF.23829.3"; tss_id "TSS18020"; |
| chr13 | Cufflinks exon | 28422145 | 28422673 | . | - | . | gene_id "XLOC_014197"; transcript_id "TCONS_00024037"; exon_number "5"; oId "CUFF.23829.3"; tss_id "TSS18020"; |
| chr13 | Cufflinks exon | 28471194 | 28471268 | . | - | . | gene_id "XLOC_014197"; transcript_id "TCONS_00024037"; exon_number "6"; oId "CUFF.23829.3"; tss_id "TSS18020"; |
| chr13 | Cufflinks exon | 28403278 | 28404420 | . | - | . | gene_id "XLOC_014197"; transcript_id "TCONS_00024038"; exon_number "1"; oId "CUFF.23829.4"; tss_id "TSS18018"; |
| chr13 | Cufflinks exon | 28407581 | 28408287 | . | - | . | gene_id "XLOC_014197"; transcript_id "TCONS_00024038"; exon_number "2"; oId "CUFF.23829.4"; tss_id "TSS18018"; |
| chr13 | Cufflinks exon | 28422145 | 28422673 | . | - | . | gene_id "XLOC_014197"; transcript_id "TCONS_00024038"; exon_number "3"; oId "CUFF.23829.4"; tss_id "TSS18018"; |
| chr13 | Cufflinks exon | 28495301 | 28495577 | . | - | . | gene_id "XLOC_014197"; transcript_id "TCONS_00024038"; exon_number "4"; oId "CUFF.23829.4"; tss_id "TSS18018"; |
| chr13 | Cufflinks exon | 28492743 | 28493106 | . | - | . | gene_id "XLOC_014197"; transcript_id "TCONS_00024040"; exon_number "1"; oId "CUFF.23829.6"; tss_id "TSS18018"; |
| chr13 | Cufflinks exon | 28495301 | 28495560 | . | - | . | gene_id "XLOC_014197"; transcript_id "TCONS_00024040"; exon_number "2"; oId "CUFF.23829.6"; tss_id "TSS18018"; |



|       |                        |          |   |   |   |                                                                                                                 |
|-------|------------------------|----------|---|---|---|-----------------------------------------------------------------------------------------------------------------|
| chr13 | Cufflinks exon30990396 | 30994082 | . | - | . | gene_id "XLOC_014231"; transcript_id "TCONS_00024094"; exon_number "1"; oId "CUFF.23924.3"; tss_id "TSS18070";  |
| chr13 | Cufflinks exon30994945 | 30995251 | . | - | . | gene_id "XLOC_014231"; transcript_id "TCONS_00024094"; exon_number "2"; oId "CUFF.23924.3"; tss_id "TSS18070";  |
| chr13 | Cufflinks exon30990396 | 30994082 | . | - | . | gene_id "XLOC_014231"; transcript_id "TCONS_00024095"; exon_number "1"; oId "CUFF.23924.4"; tss_id "TSS18071";  |
| chr13 | Cufflinks exon30995544 | 30995591 | . | - | . | gene_id "XLOC_014231"; transcript_id "TCONS_00024095"; exon_number "2"; oId "CUFF.23924.4"; tss_id "TSS18071";  |
| chr13 | Cufflinks exon30990396 | 30990644 | . | - | . | gene_id "XLOC_014231"; transcript_id "TCONS_00024096"; exon_number "1"; oId "CUFF.23924.2"; tss_id "TSS18072";  |
| chr13 | Cufflinks exon30992175 | 30994082 | . | - | . | gene_id "XLOC_014231"; transcript_id "TCONS_00024096"; exon_number "2"; oId "CUFF.23924.2"; tss_id "TSS18072";  |
| chr13 | Cufflinks exon30996354 | 30996381 | . | - | . | gene_id "XLOC_014231"; transcript_id "TCONS_00024096"; exon_number "3"; oId "CUFF.23924.2"; tss_id "TSS18072";  |
| chr13 | Cufflinks exon30990396 | 30994082 | . | - | . | gene_id "XLOC_014231"; transcript_id "TCONS_00024097"; exon_number "1"; oId "CUFF.23924.1"; tss_id "TSS18072";  |
| chr13 | Cufflinks exon30996354 | 30996389 | . | - | . | gene_id "XLOC_014231"; transcript_id "TCONS_00024097"; exon_number "2"; oId "CUFF.23924.1"; tss_id "TSS18072";  |
| chr13 | Cufflinks exon48273491 | 48273632 | . | - | . | gene_id "XLOC_014395"; transcript_id "TCONS_00024383"; exon_number "1"; oId "CUFF.24540.1"; tss_id "TSS18276";  |
| chr13 | Cufflinks exon48273752 | 48273914 | . | - | . | gene_id "XLOC_014395"; transcript_id "TCONS_00024383"; exon_number "2"; oId "CUFF.24540.1"; tss_id "TSS18276";  |
| chr13 | Cufflinks exon48381529 | 48381634 | . | - | . | gene_id "XLOC_014395"; transcript_id "TCONS_00024383"; exon_number "3"; oId "CUFF.24540.1"; tss_id "TSS18276";  |
| chr13 | Cufflinks exon48385291 | 48385406 | . | - | . | gene_id "XLOC_014395"; transcript_id "TCONS_00024383"; exon_number "4"; oId "CUFF.24540.1"; tss_id "TSS18276";  |
| chr13 | Cufflinks exon48479464 | 48479533 | . | - | . | gene_id "XLOC_014395"; transcript_id "TCONS_00024383"; exon_number "5"; oId "CUFF.24540.1"; tss_id "TSS18276";  |
| chr13 | Cufflinks exon48481153 | 48481270 | . | - | . | gene_id "XLOC_014395"; transcript_id "TCONS_00024383"; exon_number "6"; oId "CUFF.24540.1"; tss_id "TSS18276";  |
| chr13 | Cufflinks exon48501040 | 48501076 | . | - | . | gene_id "XLOC_014395"; transcript_id "TCONS_00024383"; exon_number "7"; oId "CUFF.24540.1"; tss_id "TSS18276";  |
| chr13 | Cufflinks exon48501410 | 48501544 | . | - | . | gene_id "XLOC_014395"; transcript_id "TCONS_00024383"; exon_number "8"; oId "CUFF.24540.1"; tss_id "TSS18276";  |
| chr13 | Cufflinks exon48506829 | 48506918 | . | - | . | gene_id "XLOC_014395"; transcript_id "TCONS_00024383"; exon_number "9"; oId "CUFF.24540.1"; tss_id "TSS18276";  |
| chr13 | Cufflinks exon48509050 | 48510908 | . | - | . | gene_id "XLOC_014395"; transcript_id "TCONS_00024383"; exon_number "10"; oId "CUFF.24540.1"; tss_id "TSS18276"; |
| chr13 | Cufflinks exon48513402 | 48516632 | . | - | . | gene_id "XLOC_014395"; transcript_id "TCONS_00024383"; exon_number "11"; oId "CUFF.24540.1"; tss_id "TSS18276"; |
| chr13 | Cufflinks exon48480309 | 48481270 | . | - | . | gene_id "XLOC_014395"; transcript_id "TCONS_00024389"; exon_number "1"; oId "CUFF.24540.8"; tss_id "TSS18277";  |
| chr13 | Cufflinks exon48501040 | 48501076 | . | - | . | gene_id "XLOC_014395"; transcript_id "TCONS_00024389"; exon_number "1"; oId "CUFF.24540.8"; tss_id "TSS18277";  |

"2"; oId "CUFF.24540.8"; tss\_id "TSS18277";  
chr13 Cufflinks exon48480309 48481270 . - . gene\_id "XLOC\_014395"; transcript\_id "TCONS\_00024390"; exon\_number  
"1"; oId "CUFF.24540.9"; tss\_id "TSS18276";  
chr13 Cufflinks exon48506829 48510908 . - . gene\_id "XLOC\_014395"; transcript\_id "TCONS\_00024390"; exon\_number  
"2"; oId "CUFF.24540.9"; tss\_id "TSS18276";  
chr13 Cufflinks exon48513402 48516632 . - . gene\_id "XLOC\_014395"; transcript\_id "TCONS\_00024390"; exon\_number  
"3"; oId "CUFF.24540.9"; tss\_id "TSS18276";  
chr13 Cufflinks exon49141218 49142483 . - . gene\_id "XLOC\_014414"; transcript\_id "TCONS\_00024414"; exon\_number  
"1"; oId "CUFF.24617.2"; tss\_id "TSS18300";  
chr13 Cufflinks exon49144444 49144977 . - . gene\_id "XLOC\_014414"; transcript\_id "TCONS\_00024414"; exon\_number  
"2"; oId "CUFF.24617.2"; tss\_id "TSS18300";  
chr13 Cufflinks exon49145111 49146024 . - . gene\_id "XLOC\_014414"; transcript\_id "TCONS\_00024414"; exon\_number  
"3"; oId "CUFF.24617.2"; tss\_id "TSS18300";  
chr13 Cufflinks exon49141218 49142483 . - . gene\_id "XLOC\_014414"; transcript\_id "TCONS\_00024413"; exon\_number  
"1"; oId "CUFF.24617.1"; tss\_id "TSS18300";  
chr13 Cufflinks exon49145111 49146024 . - . gene\_id "XLOC\_014414"; transcript\_id "TCONS\_00024413"; exon\_number  
"2"; oId "CUFF.24617.1"; tss\_id "TSS18300";  
chr13 Cufflinks exon49809683 49810097 . - . gene\_id "XLOC\_014421"; transcript\_id "TCONS\_00024422"; exon\_number  
"1"; oId "CUFF.24662.1"; tss\_id "TSS18307";  
chr13 Cufflinks exon49821595 49821986 . - . gene\_id "XLOC\_014421"; transcript\_id "TCONS\_00024422"; exon\_number  
"2"; oId "CUFF.24662.1"; tss\_id "TSS18307";  
chr13 Cufflinks exon50526550 50526590 . - . gene\_id "XLOC\_014432"; transcript\_id "TCONS\_00024444"; exon\_number  
"1"; oId "CUFF.24701.1"; tss\_id "TSS18324";  
chr13 Cufflinks exon50550469 50551045 . - . gene\_id "XLOC\_014432"; transcript\_id "TCONS\_00024444"; exon\_number  
"2"; oId "CUFF.24701.1"; tss\_id "TSS18324";  
chr13 Cufflinks exon50552199 50555492 . - . gene\_id "XLOC\_014432"; transcript\_id "TCONS\_00024444"; exon\_number  
"3"; oId "CUFF.24701.1"; tss\_id "TSS18324";  
chr13 Cufflinks exon50838497 50838534 . - . gene\_id "XLOC\_014432"; transcript\_id "TCONS\_00024444"; exon\_number  
"4"; oId "CUFF.24701.1"; tss\_id "TSS18324";  
chr13 Cufflinks exon50530760 50531031 . - . gene\_id "XLOC\_014432"; transcript\_id "TCONS\_00024445"; exon\_number  
"1"; oId "CUFF.24701.2"; tss\_id "TSS18325";  
chr13 Cufflinks exon50550469 50550590 . - . gene\_id "XLOC\_014432"; transcript\_id "TCONS\_00024445"; exon\_number  
"2"; oId "CUFF.24701.2"; tss\_id "TSS18325";  
chr13 Cufflinks exon50552199 50553621 . - . gene\_id "XLOC\_014432"; transcript\_id "TCONS\_00024445"; exon\_number  
"3"; oId "CUFF.24701.2"; tss\_id "TSS18325";  
chr13 Cufflinks exon50530760 50531031 . - . gene\_id "XLOC\_014432"; transcript\_id "TCONS\_00024446"; exon\_number  
"1"; oId "CUFF.24701.3"; tss\_id "TSS18324";  
chr13 Cufflinks exon50550469 50555492 . - . gene\_id "XLOC\_014432"; transcript\_id "TCONS\_00024446"; exon\_number  
"2"; oId "CUFF.24701.3"; tss\_id "TSS18324";  
chr13 Cufflinks exon50838497 50838534 . - . gene\_id "XLOC\_014432"; transcript\_id "TCONS\_00024446"; exon\_number  
"3"; oId "CUFF.24701.3"; tss\_id "TSS18324";  
chr13 Cufflinks exon50543844 50544436 . - . gene\_id "XLOC\_014432"; transcript\_id "TCONS\_00024447"; exon\_number  
"1"; oId "CUFF.24701.4"; tss\_id "TSS18324";

|       |                         |           |   |   |   |                                                                                                                |
|-------|-------------------------|-----------|---|---|---|----------------------------------------------------------------------------------------------------------------|
| chr13 | Cufflinks exon50550469  | 50555492  | . | - | . | gene_id "XLOC_014432"; transcript_id "TCONS_00024447"; exon_number "2"; oId "CUFF.24701.4"; tss_id "TSS18324"; |
| chr13 | Cufflinks exon50838497  | 50838534  | . | - | . | gene_id "XLOC_014432"; transcript_id "TCONS_00024447"; exon_number "3"; oId "CUFF.24701.4"; tss_id "TSS18324"; |
| chr13 | Cufflinks exon50609204  | 50609217  | . | - | . | gene_id "XLOC_014440"; transcript_id "TCONS_00024455"; exon_number "1"; oId "CUFF.24726.1"; tss_id "TSS18333"; |
| chr13 | Cufflinks exon50609256  | 50609290  | . | - | . | gene_id "XLOC_014440"; transcript_id "TCONS_00024455"; exon_number "2"; oId "CUFF.24726.1"; tss_id "TSS18333"; |
| chr13 | Cufflinks exon50609357  | 50619795  | . | - | . | gene_id "XLOC_014440"; transcript_id "TCONS_00024455"; exon_number "3"; oId "CUFF.24726.1"; tss_id "TSS18333"; |
| chr13 | Cufflinks exon50609382  | 50618905  | . | - | . | gene_id "XLOC_014440"; transcript_id "TCONS_00024456"; exon_number "1"; oId "CUFF.24726.3"; tss_id "TSS18334"; |
| chr13 | Cufflinks exon50623721  | 50623798  | . | - | . | gene_id "XLOC_014440"; transcript_id "TCONS_00024456"; exon_number "2"; oId "CUFF.24726.3"; tss_id "TSS18334"; |
| chr13 | Cufflinks exon50642233  | 50642299  | . | - | . | gene_id "XLOC_014440"; transcript_id "TCONS_00024456"; exon_number "3"; oId "CUFF.24726.3"; tss_id "TSS18334"; |
| chr13 | Cufflinks exon50649694  | 50649789  | . | - | . | gene_id "XLOC_014440"; transcript_id "TCONS_00024456"; exon_number "4"; oId "CUFF.24726.3"; tss_id "TSS18334"; |
| chr13 | Cufflinks exon50655959  | 50656147  | . | - | . | gene_id "XLOC_014440"; transcript_id "TCONS_00024456"; exon_number "5"; oId "CUFF.24726.3"; tss_id "TSS18334"; |
| chr13 | Cufflinks exon50609382  | 50618904  | . | - | . | gene_id "XLOC_014440"; transcript_id "TCONS_00024457"; exon_number "1"; oId "CUFF.24726.2"; tss_id "TSS18334"; |
| chr13 | Cufflinks exon50623720  | 50623798  | . | - | . | gene_id "XLOC_014440"; transcript_id "TCONS_00024457"; exon_number "2"; oId "CUFF.24726.2"; tss_id "TSS18334"; |
| chr13 | Cufflinks exon50642233  | 50642308  | . | - | . | gene_id "XLOC_014440"; transcript_id "TCONS_00024457"; exon_number "3"; oId "CUFF.24726.2"; tss_id "TSS18334"; |
| chr13 | Cufflinks exon50655968  | 50656176  | . | - | . | gene_id "XLOC_014440"; transcript_id "TCONS_00024457"; exon_number "4"; oId "CUFF.24726.2"; tss_id "TSS18334"; |
| chr13 | Cufflinks exon64548719  | 64555245  | . | - | . | gene_id "XLOC_014517"; transcript_id "TCONS_00024582"; exon_number "1"; oId "CUFF.25012.1"; tss_id "TSS18426"; |
| chr13 | Cufflinks exon64564229  | 64564333  | . | - | . | gene_id "XLOC_014517"; transcript_id "TCONS_00024582"; exon_number "2"; oId "CUFF.25012.1"; tss_id "TSS18426"; |
| chr13 | Cufflinks exon64576518  | 64576542  | . | - | . | gene_id "XLOC_014517"; transcript_id "TCONS_00024582"; exon_number "3"; oId "CUFF.25012.1"; tss_id "TSS18426"; |
| chr13 | Cufflinks exon64577481  | 64577598  | . | - | . | gene_id "XLOC_014517"; transcript_id "TCONS_00024582"; exon_number "4"; oId "CUFF.25012.1"; tss_id "TSS18426"; |
| chr13 | Cufflinks exon64649375  | 64651440  | . | - | . | gene_id "XLOC_014517"; transcript_id "TCONS_00024582"; exon_number "5"; oId "CUFF.25012.1"; tss_id "TSS18426"; |
| chr13 | Cufflinks exon96324961  | 96326922  | . | - | . | gene_id "XLOC_014586"; transcript_id "TCONS_00024721"; exon_number "1"; oId "CUFF.25326.3"; tss_id "TSS18529"; |
| chr13 | Cufflinks exon96328106  | 96329179  | . | - | . | gene_id "XLOC_014586"; transcript_id "TCONS_00024721"; exon_number "2"; oId "CUFF.25326.3"; tss_id "TSS18529"; |
| chr13 | Cufflinks exon100055112 | 100061313 | . | - | . | gene_id "XLOC_014606"; transcript_id "TCONS_00024763"; exon_number                                             |

|                                             |   |   |   |                                                                    |  |
|---------------------------------------------|---|---|---|--------------------------------------------------------------------|--|
| "1"; oId "CUFF.25376.2"; tss_id "TSS18561"; |   |   |   |                                                                    |  |
| chr13 Cufflinks exon100069311 100069478     | . | - | . | gene_id "XLOC_014606"; transcript_id "TCONS_00024763"; exon_number |  |
| "2"; oId "CUFF.25376.2"; tss_id "TSS18561"; |   |   |   |                                                                    |  |
| chr13 Cufflinks exon100069675 100069843     | . | - | . | gene_id "XLOC_014606"; transcript_id "TCONS_00024763"; exon_number |  |
| "3"; oId "CUFF.25376.2"; tss_id "TSS18561"; |   |   |   |                                                                    |  |
| chr13 Cufflinks exon100055112 100061313     | . | - | . | gene_id "XLOC_014606"; transcript_id "TCONS_00024765"; exon_number |  |
| "1"; oId "CUFF.25376.4"; tss_id "TSS18562"; |   |   |   |                                                                    |  |
| chr13 Cufflinks exon100069311 100069478     | . | - | . | gene_id "XLOC_014606"; transcript_id "TCONS_00024765"; exon_number |  |
| "2"; oId "CUFF.25376.4"; tss_id "TSS18562"; |   |   |   |                                                                    |  |
| chr13 Cufflinks exon100069612 100070519     | . | - | . | gene_id "XLOC_014606"; transcript_id "TCONS_00024765"; exon_number |  |
| "3"; oId "CUFF.25376.4"; tss_id "TSS18562"; |   |   |   |                                                                    |  |
| chr13 Cufflinks exon100055112 100061313     | . | - | . | gene_id "XLOC_014606"; transcript_id "TCONS_00024764"; exon_number |  |
| "1"; oId "CUFF.25376.3"; tss_id "TSS18562"; |   |   |   |                                                                    |  |
| chr13 Cufflinks exon100068986 100069174     | . | - | . | gene_id "XLOC_014606"; transcript_id "TCONS_00024764"; exon_number |  |
| "2"; oId "CUFF.25376.3"; tss_id "TSS18562"; |   |   |   |                                                                    |  |
| chr13 Cufflinks exon100069311 100070519     | . | - | . | gene_id "XLOC_014606"; transcript_id "TCONS_00024764"; exon_number |  |
| "3"; oId "CUFF.25376.3"; tss_id "TSS18562"; |   |   |   |                                                                    |  |
| chr13 Cufflinks exon100055112 100061313     | . | - | . | gene_id "XLOC_014606"; transcript_id "TCONS_00024766"; exon_number |  |
| "1"; oId "CUFF.25376.1"; tss_id "TSS18563"; |   |   |   |                                                                    |  |
| chr13 Cufflinks exon100069320 100069478     | . | - | . | gene_id "XLOC_014606"; transcript_id "TCONS_00024766"; exon_number |  |
| "2"; oId "CUFF.25376.1"; tss_id "TSS18563"; |   |   |   |                                                                    |  |
| chr13 Cufflinks exon100075595 100075825     | . | - | . | gene_id "XLOC_014606"; transcript_id "TCONS_00024766"; exon_number |  |
| "3"; oId "CUFF.25376.1"; tss_id "TSS18563"; |   |   |   |                                                                    |  |
| chr13 Cufflinks exon100706261 100706268     | . | - | . | gene_id "XLOC_014610"; transcript_id "TCONS_00024774"; exon_number |  |
| "1"; oId "CUFF.25411.1"; tss_id "TSS18570"; |   |   |   |                                                                    |  |
| chr13 Cufflinks exon100738872 100738981     | . | - | . | gene_id "XLOC_014610"; transcript_id "TCONS_00024774"; exon_number |  |
| "2"; oId "CUFF.25411.1"; tss_id "TSS18570"; |   |   |   |                                                                    |  |
| chr13 Cufflinks exon100740887 100741236     | . | - | . | gene_id "XLOC_014610"; transcript_id "TCONS_00024774"; exon_number |  |
| "3"; oId "CUFF.25411.1"; tss_id "TSS18570"; |   |   |   |                                                                    |  |
| chr13 Cufflinks exon103246445 103246751     | . | - | . | gene_id "XLOC_014631"; transcript_id "TCONS_00024805"; exon_number |  |
| "1"; oId "CUFF.25444.1"; tss_id "TSS18594"; |   |   |   |                                                                    |  |
| chr13 Cufflinks exon103248798 103249179     | . | - | . | gene_id "XLOC_014631"; transcript_id "TCONS_00024805"; exon_number |  |
| "2"; oId "CUFF.25444.1"; tss_id "TSS18594"; |   |   |   |                                                                    |  |
| chr13 Cufflinks exon105224849 105225472     | . | - | . | gene_id "XLOC_014645"; transcript_id "TCONS_00024826"; exon_number |  |
| "1"; oId "CUFF.25485.1"; tss_id "TSS18611"; |   |   |   |                                                                    |  |
| chr13 Cufflinks exon105265721 105265848     | . | - | . | gene_id "XLOC_014645"; transcript_id "TCONS_00024826"; exon_number |  |
| "2"; oId "CUFF.25485.1"; tss_id "TSS18611"; |   |   |   |                                                                    |  |
| chr13 Cufflinks exon105360198 105360280     | . | - | . | gene_id "XLOC_014645"; transcript_id "TCONS_00024826"; exon_number |  |
| "3"; oId "CUFF.25485.1"; tss_id "TSS18611"; |   |   |   |                                                                    |  |
| chr13 Cufflinks exon105360903 105360996     | . | - | . | gene_id "XLOC_014645"; transcript_id "TCONS_00024826"; exon_number |  |
| "4"; oId "CUFF.25485.1"; tss_id "TSS18611"; |   |   |   |                                                                    |  |
| chr13 Cufflinks exon105362182 105362289     | . | - | . | gene_id "XLOC_014645"; transcript_id "TCONS_00024826"; exon_number |  |
| "5"; oId "CUFF.25485.1"; tss_id "TSS18611"; |   |   |   |                                                                    |  |



|       |                |           |           |   |   |   |                                                                                                                |
|-------|----------------|-----------|-----------|---|---|---|----------------------------------------------------------------------------------------------------------------|
| chr13 | Cufflinks exon | 105365141 | 105365219 | . | - | . | gene_id "XLOC_014645"; transcript_id "TCONS_00024826"; exon_number "6"; oId "CUFF.25485.1"; tss_id "TSS18611"; |
| chr13 | Cufflinks exon | 105368241 | 105368298 | . | - | . | gene_id "XLOC_014645"; transcript_id "TCONS_00024826"; exon_number "7"; oId "CUFF.25485.1"; tss_id "TSS18611"; |
| chr13 | Cufflinks exon | 105408273 | 105408345 | . | - | . | gene_id "XLOC_014645"; transcript_id "TCONS_00024826"; exon_number "8"; oId "CUFF.25485.1"; tss_id "TSS18611"; |
| chr13 | Cufflinks exon | 105413069 | 105413095 | . | - | . | gene_id "XLOC_014645"; transcript_id "TCONS_00024826"; exon_number "9"; oId "CUFF.25485.1"; tss_id "TSS18611"; |
| chr13 | Cufflinks exon | 105359636 | 105359960 | . | - | . | gene_id "XLOC_014645"; transcript_id "TCONS_00024868"; exon_number "1"; oId "CUFF.25485.2"; tss_id "TSS18611"; |
| chr13 | Cufflinks exon | 105360198 | 105360280 | . | - | . | gene_id "XLOC_014645"; transcript_id "TCONS_00024868"; exon_number "2"; oId "CUFF.25485.2"; tss_id "TSS18611"; |
| chr13 | Cufflinks exon | 105360903 | 105360996 | . | - | . | gene_id "XLOC_014645"; transcript_id "TCONS_00024868"; exon_number "3"; oId "CUFF.25485.2"; tss_id "TSS18611"; |
| chr13 | Cufflinks exon | 105362182 | 105362289 | . | - | . | gene_id "XLOC_014645"; transcript_id "TCONS_00024868"; exon_number "4"; oId "CUFF.25485.2"; tss_id "TSS18611"; |
| chr13 | Cufflinks exon | 105365141 | 105365219 | . | - | . | gene_id "XLOC_014645"; transcript_id "TCONS_00024868"; exon_number "5"; oId "CUFF.25485.2"; tss_id "TSS18611"; |
| chr13 | Cufflinks exon | 105368241 | 105368298 | . | - | . | gene_id "XLOC_014645"; transcript_id "TCONS_00024868"; exon_number "6"; oId "CUFF.25485.2"; tss_id "TSS18611"; |
| chr13 | Cufflinks exon | 105408273 | 105408345 | . | - | . | gene_id "XLOC_014645"; transcript_id "TCONS_00024868"; exon_number "7"; oId "CUFF.25485.2"; tss_id "TSS18611"; |
| chr13 | Cufflinks exon | 105413069 | 105413095 | . | - | . | gene_id "XLOC_014645"; transcript_id "TCONS_00024868"; exon_number "8"; oId "CUFF.25485.2"; tss_id "TSS18611"; |
| chr13 | Cufflinks exon | 105230423 | 105230434 | . | - | . | gene_id "XLOC_014646"; transcript_id "TCONS_00024827"; exon_number "1"; oId "CUFF.25487.1"; tss_id "TSS18612"; |
| chr13 | Cufflinks exon | 105344947 | 105348791 | . | - | . | gene_id "XLOC_014646"; transcript_id "TCONS_00024827"; exon_number "2"; oId "CUFF.25487.1"; tss_id "TSS18612"; |
| chr13 | Cufflinks exon | 105325988 | 105330730 | . | - | . | gene_id "XLOC_014675"; transcript_id "TCONS_00024856"; exon_number "1"; oId "CUFF.25530.1"; tss_id "TSS18642"; |
| chr13 | Cufflinks exon | 105341196 | 105341269 | . | - | . | gene_id "XLOC_014675"; transcript_id "TCONS_00024856"; exon_number "2"; oId "CUFF.25530.1"; tss_id "TSS18642"; |
| chr13 | Cufflinks exon | 105335593 | 105337778 | . | - | . | gene_id "XLOC_014675"; transcript_id "TCONS_00024859"; exon_number "1"; oId "CUFF.25530.2"; tss_id "TSS18642"; |
| chr13 | Cufflinks exon | 105341196 | 105341219 | . | - | . | gene_id "XLOC_014675"; transcript_id "TCONS_00024859"; exon_number "2"; oId "CUFF.25530.2"; tss_id "TSS18642"; |
| chr13 | Cufflinks exon | 105335593 | 105337788 | . | - | . | gene_id "XLOC_014675"; transcript_id "TCONS_00024860"; exon_number "1"; oId "CUFF.25530.3"; tss_id "TSS18642"; |
| chr13 | Cufflinks exon | 105341196 | 105341334 | . | - | . | gene_id "XLOC_014675"; transcript_id "TCONS_00024860"; exon_number "2"; oId "CUFF.25530.3"; tss_id "TSS18642"; |
| chr13 | Cufflinks exon | 105453880 | 105457969 | . | - | . | gene_id "XLOC_014702"; transcript_id "TCONS_00024887"; exon_number "1"; oId "CUFF.25567.3"; tss_id "TSS18669"; |
| chr13 | Cufflinks exon | 105462072 | 105462326 | . | - | . | gene_id "XLOC_014702"; transcript_id "TCONS_00024887"; exon_number "1"; oId "CUFF.25567.3"; tss_id "TSS18669"; |

"2"; oId "CUFF.25567.3"; tss\_id "TSS18669";  
chr13 Cufflinks exon105453880 105457969 . - . gene\_id "XLOC\_014702"; transcript\_id "TCONS\_00024888"; exon\_number  
"1"; oId "CUFF.25567.4"; tss\_id "TSS18670";  
chr13 Cufflinks exon105476014 105476138 . - . gene\_id "XLOC\_014702"; transcript\_id "TCONS\_00024888"; exon\_number  
"2"; oId "CUFF.25567.4"; tss\_id "TSS18670";  
chr13 Cufflinks exon105489554 105489655 . - . gene\_id "XLOC\_014702"; transcript\_id "TCONS\_00024888"; exon\_number  
"3"; oId "CUFF.25567.4"; tss\_id "TSS18670";  
chr13 Cufflinks exon105489989 105490044 . - . gene\_id "XLOC\_014702"; transcript\_id "TCONS\_00024888"; exon\_number  
"4"; oId "CUFF.25567.4"; tss\_id "TSS18670";  
chr13 Cufflinks exon105453880 105457969 . - . gene\_id "XLOC\_014702"; transcript\_id "TCONS\_00024890"; exon\_number  
"1"; oId "CUFF.25567.6"; tss\_id "TSS18670";  
chr13 Cufflinks exon105489554 105489652 . - . gene\_id "XLOC\_014702"; transcript\_id "TCONS\_00024890"; exon\_number  
"2"; oId "CUFF.25567.6"; tss\_id "TSS18670";  
chr13 Cufflinks exon105489989 105490054 . - . gene\_id "XLOC\_014702"; transcript\_id "TCONS\_00024890"; exon\_number  
"3"; oId "CUFF.25567.6"; tss\_id "TSS18670";  
chr13 Cufflinks exon105453880 105457969 . - . gene\_id "XLOC\_014702"; transcript\_id "TCONS\_00024889"; exon\_number  
"1"; oId "CUFF.25567.5"; tss\_id "TSS18670";  
chr13 Cufflinks exon105476014 105476138 . - . gene\_id "XLOC\_014702"; transcript\_id "TCONS\_00024889"; exon\_number  
"2"; oId "CUFF.25567.5"; tss\_id "TSS18670";  
chr13 Cufflinks exon105489989 105490054 . - . gene\_id "XLOC\_014702"; transcript\_id "TCONS\_00024889"; exon\_number  
"3"; oId "CUFF.25567.5"; tss\_id "TSS18670";  
chr13 Cufflinks exon105453880 105457969 . - . gene\_id "XLOC\_014702"; transcript\_id "TCONS\_00024892"; exon\_number  
"1"; oId "CUFF.25567.2"; tss\_id "TSS18671";  
chr13 Cufflinks exon105489554 105489652 . - . gene\_id "XLOC\_014702"; transcript\_id "TCONS\_00024892"; exon\_number  
"2"; oId "CUFF.25567.2"; tss\_id "TSS18671";  
chr13 Cufflinks exon105490141 105490329 . - . gene\_id "XLOC\_014702"; transcript\_id "TCONS\_00024892"; exon\_number  
"3"; oId "CUFF.25567.2"; tss\_id "TSS18671";  
chr13 Cufflinks exon105453880 105457969 . - . gene\_id "XLOC\_014702"; transcript\_id "TCONS\_00024891"; exon\_number  
"1"; oId "CUFF.25567.1"; tss\_id "TSS18671";  
chr13 Cufflinks exon105476014 105476138 . - . gene\_id "XLOC\_014702"; transcript\_id "TCONS\_00024891"; exon\_number  
"2"; oId "CUFF.25567.1"; tss\_id "TSS18671";  
chr13 Cufflinks exon105489554 105489652 . - . gene\_id "XLOC\_014702"; transcript\_id "TCONS\_00024891"; exon\_number  
"3"; oId "CUFF.25567.1"; tss\_id "TSS18671";  
chr13 Cufflinks exon105490141 105490329 . - . gene\_id "XLOC\_014702"; transcript\_id "TCONS\_00024891"; exon\_number  
"4"; oId "CUFF.25567.1"; tss\_id "TSS18671";  
chr13 Cufflinks exon109981911 109988183 . - . gene\_id "XLOC\_014734"; transcript\_id "TCONS\_00024931"; exon\_number  
"1"; oId "CUFF.25660.1"; tss\_id "TSS18708";  
chr13 Cufflinks exon109989206 109989571 . - . gene\_id "XLOC\_014734"; transcript\_id "TCONS\_00024931"; exon\_number  
"2"; oId "CUFF.25660.1"; tss\_id "TSS18708";  
chr13 Cufflinks exon109981911 109985243 . - . gene\_id "XLOC\_014734"; transcript\_id "TCONS\_00024932"; exon\_number  
"1"; oId "CUFF.25660.2"; tss\_id "TSS18709";  
chr13 Cufflinks exon109986694 109990085 . - . gene\_id "XLOC\_014734"; transcript\_id "TCONS\_00024932"; exon\_number  
"2"; oId "CUFF.25660.2"; tss\_id "TSS18709";

|       |                         |           |   |   |   |                                                                                                                |
|-------|-------------------------|-----------|---|---|---|----------------------------------------------------------------------------------------------------------------|
| chr13 | Cufflinks exon110001194 | 110002553 | . | - | . | gene_id "XLOC_014736"; transcript_id "TCONS_00024934"; exon_number "1"; oId "CUFF.25666.1"; tss_id "TSS18711"; |
| chr13 | Cufflinks exon110006688 | 110006732 | . | - | . | gene_id "XLOC_014736"; transcript_id "TCONS_00024934"; exon_number "2"; oId "CUFF.25666.1"; tss_id "TSS18711"; |
| chr13 | Cufflinks exon110001194 | 110002553 | . | - | . | gene_id "XLOC_014736"; transcript_id "TCONS_00024935"; exon_number "1"; oId "CUFF.25666.2"; tss_id "TSS18711"; |
| chr13 | Cufflinks exon110004521 | 110004648 | . | - | . | gene_id "XLOC_014736"; transcript_id "TCONS_00024935"; exon_number "2"; oId "CUFF.25666.2"; tss_id "TSS18711"; |
| chr13 | Cufflinks exon110006688 | 110006734 | . | - | . | gene_id "XLOC_014736"; transcript_id "TCONS_00024935"; exon_number "3"; oId "CUFF.25666.2"; tss_id "TSS18711"; |
| chr13 | Cufflinks exon110001194 | 110002553 | . | - | . | gene_id "XLOC_014736"; transcript_id "TCONS_00024936"; exon_number "1"; oId "CUFF.25666.3"; tss_id "TSS18712"; |
| chr13 | Cufflinks exon110010349 | 110010540 | . | - | . | gene_id "XLOC_014736"; transcript_id "TCONS_00024936"; exon_number "2"; oId "CUFF.25666.3"; tss_id "TSS18712"; |
| chr13 | Cufflinks exon110023780 | 110025801 | . | - | . | gene_id "XLOC_014741"; transcript_id "TCONS_00024943"; exon_number "1"; oId "CUFF.25672.3"; tss_id "TSS18717"; |
| chr13 | Cufflinks exon110212748 | 110212837 | . | - | . | gene_id "XLOC_014741"; transcript_id "TCONS_00024943"; exon_number "2"; oId "CUFF.25672.3"; tss_id "TSS18717"; |
| chr13 | Cufflinks exon110383290 | 110384532 | . | - | . | gene_id "XLOC_014741"; transcript_id "TCONS_00024943"; exon_number "3"; oId "CUFF.25672.3"; tss_id "TSS18717"; |
| chr13 | Cufflinks exon110023780 | 110025801 | . | - | . | gene_id "XLOC_014741"; transcript_id "TCONS_00024942"; exon_number "1"; oId "CUFF.25672.2"; tss_id "TSS18717"; |
| chr13 | Cufflinks exon110054378 | 110054889 | . | - | . | gene_id "XLOC_014741"; transcript_id "TCONS_00024942"; exon_number "2"; oId "CUFF.25672.2"; tss_id "TSS18717"; |
| chr13 | Cufflinks exon110212748 | 110212837 | . | - | . | gene_id "XLOC_014741"; transcript_id "TCONS_00024942"; exon_number "3"; oId "CUFF.25672.2"; tss_id "TSS18717"; |
| chr13 | Cufflinks exon110383290 | 110384532 | . | - | . | gene_id "XLOC_014741"; transcript_id "TCONS_00024942"; exon_number "4"; oId "CUFF.25672.2"; tss_id "TSS18717"; |
| chr13 | Cufflinks exon110023780 | 110025801 | . | - | . | gene_id "XLOC_014741"; transcript_id "TCONS_00024941"; exon_number "1"; oId "CUFF.25672.1"; tss_id "TSS18717"; |
| chr13 | Cufflinks exon110054378 | 110054888 | . | - | . | gene_id "XLOC_014741"; transcript_id "TCONS_00024941"; exon_number "2"; oId "CUFF.25672.1"; tss_id "TSS18717"; |
| chr13 | Cufflinks exon110212748 | 110212837 | . | - | . | gene_id "XLOC_014741"; transcript_id "TCONS_00024941"; exon_number "3"; oId "CUFF.25672.1"; tss_id "TSS18717"; |
| chr13 | Cufflinks exon110383290 | 110384532 | . | - | . | gene_id "XLOC_014741"; transcript_id "TCONS_00024941"; exon_number "4"; oId "CUFF.25672.1"; tss_id "TSS18717"; |
| chr13 | Cufflinks exon110023780 | 110025801 | . | - | . | gene_id "XLOC_014741"; transcript_id "TCONS_00024944"; exon_number "1"; oId "CUFF.25672.4"; tss_id "TSS18717"; |
| chr13 | Cufflinks exon110053051 | 110053236 | . | - | . | gene_id "XLOC_014741"; transcript_id "TCONS_00024944"; exon_number "2"; oId "CUFF.25672.4"; tss_id "TSS18717"; |
| chr13 | Cufflinks exon110054378 | 110054888 | . | - | . | gene_id "XLOC_014741"; transcript_id "TCONS_00024944"; exon_number "3"; oId "CUFF.25672.4"; tss_id "TSS18717"; |
| chr13 | Cufflinks exon110212748 | 110212837 | . | - | . | gene_id "XLOC_014741"; transcript_id "TCONS_00024944"; exon_number "4"; oId "CUFF.25672.4"; tss_id "TSS18717"; |

"4"; oId "CUFF.25672.4"; tss\_id "TSS18717";  
chr13 Cufflinks exon110383290 110384546 . - . gene\_id "XLOC\_014741"; transcript\_id "TCONS\_00024944"; exon\_number  
"5"; oId "CUFF.25672.4"; tss\_id "TSS18717";  
chr13 Cufflinks exon110191404 110191465 . - . gene\_id "XLOC\_014741"; transcript\_id "TCONS\_00024961"; exon\_number  
"1"; oId "CUFF.25672.6"; tss\_id "TSS18717";  
chr13 Cufflinks exon110383290 110384546 . - . gene\_id "XLOC\_014741"; transcript\_id "TCONS\_00024961"; exon\_number  
"2"; oId "CUFF.25672.6"; tss\_id "TSS18717";  
chr13 Cufflinks exon113619215 113622602 . - . gene\_id "XLOC\_014778"; transcript\_id "TCONS\_00025004"; exon\_number  
"1"; oId "CUFF.25814.5"; tss\_id "TSS18765";  
chr13 Cufflinks exon113622933 113623380 . - . gene\_id "XLOC\_014778"; transcript\_id "TCONS\_00025004"; exon\_number  
"2"; oId "CUFF.25814.5"; tss\_id "TSS18765";  
chr13 Cufflinks exon113619215 113622602 . - . gene\_id "XLOC\_014778"; transcript\_id "TCONS\_00025005"; exon\_number  
"1"; oId "CUFF.25814.4"; tss\_id "TSS18765";  
chr13 Cufflinks exon113622930 113623451 . - . gene\_id "XLOC\_014778"; transcript\_id "TCONS\_00025005"; exon\_number  
"2"; oId "CUFF.25814.4"; tss\_id "TSS18765";  
chr13 Cufflinks exon113619215 113622327 . - . gene\_id "XLOC\_014778"; transcript\_id "TCONS\_00025007"; exon\_number  
"1"; oId "CUFF.25814.6"; tss\_id "TSS18765";  
chr13 Cufflinks exon113622957 113623480 . - . gene\_id "XLOC\_014778"; transcript\_id "TCONS\_00025007"; exon\_number  
"2"; oId "CUFF.25814.6"; tss\_id "TSS18765";  
chr13 Cufflinks exon113619215 113622264 . - . gene\_id "XLOC\_014778"; transcript\_id "TCONS\_00025009"; exon\_number  
"1"; oId "CUFF.25814.3"; tss\_id "TSS18765";  
chr13 Cufflinks exon113622933 113623486 . - . gene\_id "XLOC\_014778"; transcript\_id "TCONS\_00025009"; exon\_number  
"2"; oId "CUFF.25814.3"; tss\_id "TSS18765";  
chr13 Cufflinks exon113619215 113622303 . - . gene\_id "XLOC\_014778"; transcript\_id "TCONS\_00025008"; exon\_number  
"1"; oId "CUFF.25814.1"; tss\_id "TSS18765";  
chr13 Cufflinks exon113622933 113623486 . - . gene\_id "XLOC\_014778"; transcript\_id "TCONS\_00025008"; exon\_number  
"2"; oId "CUFF.25814.1"; tss\_id "TSS18765";  
chr13 Cufflinks exon113802715 113805278 . - . gene\_id "XLOC\_014781"; transcript\_id "TCONS\_00025015"; exon\_number  
"1"; oId "CUFF.25821.4"; tss\_id "TSS18769";  
chr13 Cufflinks exon113807459 113808338 . - . gene\_id "XLOC\_014781"; transcript\_id "TCONS\_00025015"; exon\_number  
"2"; oId "CUFF.25821.4"; tss\_id "TSS18769";  
chr13 Cufflinks exon113802715 113805124 . - . gene\_id "XLOC\_014781"; transcript\_id "TCONS\_00025014"; exon\_number  
"1"; oId "CUFF.25821.2"; tss\_id "TSS18769";  
chr13 Cufflinks exon 113807458 113808338 . - . gene\_id "XLOC\_014781"; transcript\_id "TCONS\_00025014";  
exon\_number "2"; oId "CUFF.25821.2"; tss\_id "TSS18769";  
chr13 Cufflinks exon 113802715 113805277 . - . gene\_id "XLOC\_014781"; transcript\_id "TCONS\_00025013";  
exon\_number "1"; oId "CUFF.25821.1"; tss\_id "TSS18769";  
chr13 Cufflinks exon 113807458 113808338 . - . gene\_id "XLOC\_014781"; transcript\_id "TCONS\_00025013";  
exon\_number "2"; oId "CUFF.25821.1"; tss\_id "TSS18769";  
chr13 Cufflinks exon 113818282 113819497 . - . gene\_id "XLOC\_014782"; transcript\_id "TCONS\_00025019";  
exon\_number "1"; oId "CUFF.25824.3"; tss\_id "TSS18770";  
chr13 Cufflinks exon113825684 113831399 . - . gene\_id "XLOC\_014782"; transcript\_id "TCONS\_00025019"; exon\_number  
"2"; oId "CUFF.25824.3"; tss\_id "TSS18770";

|       |                         |           |   |   |   |                                                                                                                |
|-------|-------------------------|-----------|---|---|---|----------------------------------------------------------------------------------------------------------------|
| chr13 | Cufflinks exon113818282 | 113819497 | . | - | . | gene_id "XLOC_014782"; transcript_id "TCONS_00025020"; exon_number "1"; oId "CUFF.25824.4"; tss_id "TSS18770"; |
| chr13 | Cufflinks exon113824116 | 113824402 | . | - | . | gene_id "XLOC_014782"; transcript_id "TCONS_00025020"; exon_number "2"; oId "CUFF.25824.4"; tss_id "TSS18770"; |
| chr13 | Cufflinks exon113825684 | 113831399 | . | - | . | gene_id "XLOC_014782"; transcript_id "TCONS_00025020"; exon_number "3"; oId "CUFF.25824.4"; tss_id "TSS18770"; |
| chr13 | Cufflinks exon113818282 | 113819497 | . | - | . | gene_id "XLOC_014782"; transcript_id "TCONS_00025018"; exon_number "1"; oId "CUFF.25824.2"; tss_id "TSS18770"; |
| chr13 | Cufflinks exon113824141 | 113824402 | . | - | . | gene_id "XLOC_014782"; transcript_id "TCONS_00025018"; exon_number "2"; oId "CUFF.25824.2"; tss_id "TSS18770"; |
| chr13 | Cufflinks exon113825684 | 113831399 | . | - | . | gene_id "XLOC_014782"; transcript_id "TCONS_00025018"; exon_number "3"; oId "CUFF.25824.2"; tss_id "TSS18770"; |
| chr13 | Cufflinks exon113818282 | 113819497 | . | - | . | gene_id "XLOC_014782"; transcript_id "TCONS_00025017"; exon_number "1"; oId "CUFF.25824.1"; tss_id "TSS18770"; |
| chr13 | Cufflinks exon113824116 | 113824402 | . | - | . | gene_id "XLOC_014782"; transcript_id "TCONS_00025017"; exon_number "2"; oId "CUFF.25824.1"; tss_id "TSS18770"; |
| chr13 | Cufflinks exon113825684 | 113826638 | . | - | . | gene_id "XLOC_014782"; transcript_id "TCONS_00025017"; exon_number "3"; oId "CUFF.25824.1"; tss_id "TSS18770"; |
| chr13 | Cufflinks exon113827277 | 113831399 | . | - | . | gene_id "XLOC_014782"; transcript_id "TCONS_00025017"; exon_number "4"; oId "CUFF.25824.1"; tss_id "TSS18770"; |
| chr13 | Cufflinks exon113826685 | 113827462 | . | - | . | gene_id "XLOC_014782"; transcript_id "TCONS_00025022"; exon_number "1"; oId "CUFF.25824.6"; tss_id "TSS18771"; |
| chr13 | Cufflinks exon113829692 | 113829759 | . | - | . | gene_id "XLOC_014782"; transcript_id "TCONS_00025022"; exon_number "2"; oId "CUFF.25824.6"; tss_id "TSS18771"; |
| chr13 | Cufflinks exon114628601 | 114628648 | . | - | . | gene_id "XLOC_014797"; transcript_id "TCONS_00025044"; exon_number "1"; oId "CUFF.25883.1"; tss_id "TSS18792"; |
| chr13 | Cufflinks exon114630001 | 114630699 | . | - | . | gene_id "XLOC_014797"; transcript_id "TCONS_00025044"; exon_number "2"; oId "CUFF.25883.1"; tss_id "TSS18792"; |
| chr13 | Cufflinks exon114630889 | 114633227 | . | - | . | gene_id "XLOC_014797"; transcript_id "TCONS_00025044"; exon_number "3"; oId "CUFF.25883.1"; tss_id "TSS18792"; |
| chr13 | Cufflinks exon114628731 | 114631451 | . | - | . | gene_id "XLOC_014797"; transcript_id "TCONS_00025046"; exon_number "1"; oId "CUFF.25883.3"; tss_id "TSS18793"; |
| chr13 | Cufflinks exon114631636 | 114631862 | . | - | . | gene_id "XLOC_014797"; transcript_id "TCONS_00025046"; exon_number "2"; oId "CUFF.25883.3"; tss_id "TSS18793"; |
| chr13 | Cufflinks exon114632794 | 114639959 | . | - | . | gene_id "XLOC_014797"; transcript_id "TCONS_00025046"; exon_number "3"; oId "CUFF.25883.3"; tss_id "TSS18793"; |
| chr13 | Cufflinks exon114628731 | 114631451 | . | - | . | gene_id "XLOC_014797"; transcript_id "TCONS_00025045"; exon_number "1"; oId "CUFF.25883.2"; tss_id "TSS18793"; |
| chr13 | Cufflinks exon114631636 | 114639959 | . | - | . | gene_id "XLOC_014797"; transcript_id "TCONS_00025045"; exon_number "2"; oId "CUFF.25883.2"; tss_id "TSS18793"; |
| chr14 | Cufflinks exon20708735  | 20708762  | . | + | . | gene_id "XLOC_014836"; transcript_id "TCONS_00025092"; exon_number "1"; oId "CUFF.25993.1"; tss_id "TSS18835"; |
| chr14 | Cufflinks exon20949431  | 20950448  | . | + | . | gene_id "XLOC_014836"; transcript_id "TCONS_00025092"; exon_number                                             |

"2"; oId "CUFF.25993.1"; tss\_id "TSS18835";  
chr14 Cufflinks exon24420157 24420265 . + . gene\_id "XLOC\_014937"; transcript\_id "TCONS\_00025268"; exon\_number  
"1"; oId "CUFF.26282.2"; tss\_id "TSS18963";  
chr14 Cufflinks exon24454725 24456364 . + . gene\_id "XLOC\_014937"; transcript\_id "TCONS\_00025268"; exon\_number  
"2"; oId "CUFF.26282.2"; tss\_id "TSS18963";  
chr14 Cufflinks exon24912146 24912318 . + . gene\_id "XLOC\_014978"; transcript\_id "TCONS\_00025340"; exon\_number  
"1"; oId "CUFF.26392.1"; tss\_id "TSS19016";  
chr14 Cufflinks exon24914596 24914777 . + . gene\_id "XLOC\_014978"; transcript\_id "TCONS\_00025340"; exon\_number  
"2"; oId "CUFF.26392.1"; tss\_id "TSS19016";  
chr14 Cufflinks exon24943392 24946543 . + . gene\_id "XLOC\_014978"; transcript\_id "TCONS\_00025340"; exon\_number  
"3"; oId "CUFF.26392.1"; tss\_id "TSS19016";  
chr14 Cufflinks exon35605815 35605858 . + . gene\_id "XLOC\_015011"; transcript\_id "TCONS\_00025398"; exon\_number  
"1"; oId "CUFF.26631.1"; tss\_id "TSS19058";  
chr14 Cufflinks exon35746510 35747752 . + . gene\_id "XLOC\_015011"; transcript\_id "TCONS\_00025398"; exon\_number  
"2"; oId "CUFF.26631.1"; tss\_id "TSS19058";  
chr14 Cufflinks exon36988483 36988884 . + . gene\_id "XLOC\_015037"; transcript\_id "TCONS\_00025426"; exon\_number  
"1"; oId "CUFF.26691.1"; tss\_id "TSS19086";  
chr14 Cufflinks exon36990849 36992221 . + . gene\_id "XLOC\_015037"; transcript\_id "TCONS\_00025426"; exon\_number  
"2"; oId "CUFF.26691.1"; tss\_id "TSS19086";  
chr14 Cufflinks exon37116262 37116945 . + . gene\_id "XLOC\_015038"; transcript\_id "TCONS\_00025428"; exon\_number  
"1"; oId "CUFF.26698.2"; tss\_id "TSS19087";  
chr14 Cufflinks exon37117194 37117304 . + . gene\_id "XLOC\_015038"; transcript\_id "TCONS\_00025428"; exon\_number  
"2"; oId "CUFF.26698.2"; tss\_id "TSS19087";  
chr14 Cufflinks exon37117672 37117783 . + . gene\_id "XLOC\_015038"; transcript\_id "TCONS\_00025428"; exon\_number  
"3"; oId "CUFF.26698.2"; tss\_id "TSS19087";  
chr14 Cufflinks exon37118273 37118348 . + . gene\_id "XLOC\_015038"; transcript\_id "TCONS\_00025428"; exon\_number  
"4"; oId "CUFF.26698.2"; tss\_id "TSS19087";  
chr14 Cufflinks exon37118568 37122721 . + . gene\_id "XLOC\_015038"; transcript\_id "TCONS\_00025428"; exon\_number  
"5"; oId "CUFF.26698.2"; tss\_id "TSS19087";  
chr14 Cufflinks exon37116262 37116945 . + . gene\_id "XLOC\_015038"; transcript\_id "TCONS\_00025429"; exon\_number  
"1"; oId "CUFF.26698.3"; tss\_id "TSS19087";  
chr14 Cufflinks exon37123954 37126582 . + . gene\_id "XLOC\_015038"; transcript\_id "TCONS\_00025429"; exon\_number  
"2"; oId "CUFF.26698.3"; tss\_id "TSS19087";  
chr14 Cufflinks exon39901806 39901879 . + . gene\_id "XLOC\_015058"; transcript\_id "TCONS\_00025458"; exon\_number  
"1"; oId "CUFF.26762.2"; tss\_id "TSS19109";  
chr14 Cufflinks exon39939522 39939604 . + . gene\_id "XLOC\_015058"; transcript\_id "TCONS\_00025458"; exon\_number  
"2"; oId "CUFF.26762.2"; tss\_id "TSS19109";  
chr14 Cufflinks exon40115674 40115775 . + . gene\_id "XLOC\_015058"; transcript\_id "TCONS\_00025458"; exon\_number  
"3"; oId "CUFF.26762.2"; tss\_id "TSS19109";  
chr14 Cufflinks exon40124708 40125012 . + . gene\_id "XLOC\_015058"; transcript\_id "TCONS\_00025458"; exon\_number  
"4"; oId "CUFF.26762.2"; tss\_id "TSS19109";  
chr14 Cufflinks exon40131879 40137204 . + . gene\_id "XLOC\_015058"; transcript\_id "TCONS\_00025458"; exon\_number  
"5"; oId "CUFF.26762.2"; tss\_id "TSS19109";

|       |                        |          |   |   |   |                                                                                                                 |
|-------|------------------------|----------|---|---|---|-----------------------------------------------------------------------------------------------------------------|
| chr14 | Cufflinks exon39901820 | 39901879 | . | + | . | gene_id "XLOC_015058"; transcript_id "TCONS_00025459"; exon_number "1"; oId "CUFF.26762.5"; tss_id "TSS19109";  |
| chr14 | Cufflinks exon39939522 | 39939604 | . | + | . | gene_id "XLOC_015058"; transcript_id "TCONS_00025459"; exon_number "2"; oId "CUFF.26762.5"; tss_id "TSS19109";  |
| chr14 | Cufflinks exon40124708 | 40125012 | . | + | . | gene_id "XLOC_015058"; transcript_id "TCONS_00025459"; exon_number "3"; oId "CUFF.26762.5"; tss_id "TSS19109";  |
| chr14 | Cufflinks exon40131879 | 40137204 | . | + | . | gene_id "XLOC_015058"; transcript_id "TCONS_00025459"; exon_number "4"; oId "CUFF.26762.5"; tss_id "TSS19109";  |
| chr14 | Cufflinks exon39901820 | 39901879 | . | + | . | gene_id "XLOC_015058"; transcript_id "TCONS_00025460"; exon_number "1"; oId "CUFF.26762.4"; tss_id "TSS19109";  |
| chr14 | Cufflinks exon39939522 | 39939604 | . | + | . | gene_id "XLOC_015058"; transcript_id "TCONS_00025460"; exon_number "2"; oId "CUFF.26762.4"; tss_id "TSS19109";  |
| chr14 | Cufflinks exon40111917 | 40111969 | . | + | . | gene_id "XLOC_015058"; transcript_id "TCONS_00025460"; exon_number "3"; oId "CUFF.26762.4"; tss_id "TSS19109";  |
| chr14 | Cufflinks exon40115674 | 40115775 | . | + | . | gene_id "XLOC_015058"; transcript_id "TCONS_00025460"; exon_number "4"; oId "CUFF.26762.4"; tss_id "TSS19109";  |
| chr14 | Cufflinks exon40124049 | 40124144 | . | + | . | gene_id "XLOC_015058"; transcript_id "TCONS_00025460"; exon_number "5"; oId "CUFF.26762.4"; tss_id "TSS19109";  |
| chr14 | Cufflinks exon40124708 | 40125012 | . | + | . | gene_id "XLOC_015058"; transcript_id "TCONS_00025460"; exon_number "6"; oId "CUFF.26762.4"; tss_id "TSS19109";  |
| chr14 | Cufflinks exon40324091 | 40324138 | . | + | . | gene_id "XLOC_015058"; transcript_id "TCONS_00025460"; exon_number "7"; oId "CUFF.26762.4"; tss_id "TSS19109";  |
| chr14 | Cufflinks exon39901828 | 39901879 | . | + | . | gene_id "XLOC_015058"; transcript_id "TCONS_00025461"; exon_number "1"; oId "CUFF.26762.7"; tss_id "TSS19109";  |
| chr14 | Cufflinks exon39939522 | 39939604 | . | + | . | gene_id "XLOC_015058"; transcript_id "TCONS_00025461"; exon_number "2"; oId "CUFF.26762.7"; tss_id "TSS19109";  |
| chr14 | Cufflinks exon40124708 | 40125015 | . | + | . | gene_id "XLOC_015058"; transcript_id "TCONS_00025461"; exon_number "3"; oId "CUFF.26762.7"; tss_id "TSS19109";  |
| chr14 | Cufflinks exon40131879 | 40137204 | . | + | . | gene_id "XLOC_015058"; transcript_id "TCONS_00025461"; exon_number "4"; oId "CUFF.26762.7"; tss_id "TSS19109";  |
| chr14 | Cufflinks exon40047390 | 40047432 | . | + | . | gene_id "XLOC_015058"; transcript_id "TCONS_00025463"; exon_number "1"; oId "CUFF.26762.10"; tss_id "TSS19110"; |
| chr14 | Cufflinks exon40115674 | 40115775 | . | + | . | gene_id "XLOC_015058"; transcript_id "TCONS_00025463"; exon_number "2"; oId "CUFF.26762.10"; tss_id "TSS19110"; |
| chr14 | Cufflinks exon40124708 | 40125012 | . | + | . | gene_id "XLOC_015058"; transcript_id "TCONS_00025463"; exon_number "3"; oId "CUFF.26762.10"; tss_id "TSS19110"; |
| chr14 | Cufflinks exon40131879 | 40137204 | . | + | . | gene_id "XLOC_015058"; transcript_id "TCONS_00025463"; exon_number "4"; oId "CUFF.26762.10"; tss_id "TSS19110"; |
| chr14 | Cufflinks exon53684176 | 53684773 | . | + | . | gene_id "XLOC_015125"; transcript_id "TCONS_00025565"; exon_number "1"; oId "CUFF.27115.3"; tss_id "TSS19187";  |
| chr14 | Cufflinks exon53780434 | 53780508 | . | + | . | gene_id "XLOC_015125"; transcript_id "TCONS_00025565"; exon_number "2"; oId "CUFF.27115.3"; tss_id "TSS19187";  |
| chr14 | Cufflinks exon53784749 | 53784856 | . | + | . | gene_id "XLOC_015125"; transcript_id "TCONS_00025565"; exon_number "3"; oId "CUFF.27115.3"; tss_id "TSS19187";  |

|                                              |   |   |   |                                                                    |  |
|----------------------------------------------|---|---|---|--------------------------------------------------------------------|--|
| "3"; oId "CUFF.27115.3"; tss_id "TSS19187";  |   |   |   |                                                                    |  |
| chr14 Cufflinks exon53836170 53836219        | . | + | . | gene_id "XLOC_015125"; transcript_id "TCONS_00025565"; exon_number |  |
| "4"; oId "CUFF.27115.3"; tss_id "TSS19187";  |   |   |   |                                                                    |  |
| chr14 Cufflinks exon53992529 54008758        | . | + | . | gene_id "XLOC_015125"; transcript_id "TCONS_00025565"; exon_number |  |
| "5"; oId "CUFF.27115.3"; tss_id "TSS19187";  |   |   |   |                                                                    |  |
| chr14 Cufflinks exon53684298 53684773        | . | + | . | gene_id "XLOC_015125"; transcript_id "TCONS_00025566"; exon_number |  |
| "1"; oId "CUFF.27115.5"; tss_id "TSS19188";  |   |   |   |                                                                    |  |
| chr14 Cufflinks exon53784749 53784856        | . | + | . | gene_id "XLOC_015125"; transcript_id "TCONS_00025566"; exon_number |  |
| "2"; oId "CUFF.27115.5"; tss_id "TSS19188";  |   |   |   |                                                                    |  |
| chr14 Cufflinks exon53836175 53836219        | . | + | . | gene_id "XLOC_015125"; transcript_id "TCONS_00025566"; exon_number |  |
| "3"; oId "CUFF.27115.5"; tss_id "TSS19188";  |   |   |   |                                                                    |  |
| chr14 Cufflinks exon53977443 53977597        | . | + | . | gene_id "XLOC_015125"; transcript_id "TCONS_00025566"; exon_number |  |
| "4"; oId "CUFF.27115.5"; tss_id "TSS19188";  |   |   |   |                                                                    |  |
| chr14 Cufflinks exon53992529 54008758        | . | + | . | gene_id "XLOC_015125"; transcript_id "TCONS_00025566"; exon_number |  |
| "5"; oId "CUFF.27115.5"; tss_id "TSS19188";  |   |   |   |                                                                    |  |
| chr14 Cufflinks exon53684303 53684773        | . | + | . | gene_id "XLOC_015125"; transcript_id "TCONS_00025568"; exon_number |  |
| "1"; oId "CUFF.27115.8"; tss_id "TSS19188";  |   |   |   |                                                                    |  |
| chr14 Cufflinks exon53780434 53780508        | . | + | . | gene_id "XLOC_015125"; transcript_id "TCONS_00025568"; exon_number |  |
| "2"; oId "CUFF.27115.8"; tss_id "TSS19188";  |   |   |   |                                                                    |  |
| chr14 Cufflinks exon53784749 53784856        | . | + | . | gene_id "XLOC_015125"; transcript_id "TCONS_00025568"; exon_number |  |
| "3"; oId "CUFF.27115.8"; tss_id "TSS19188";  |   |   |   |                                                                    |  |
| chr14 Cufflinks exon53836170 53836219        | . | + | . | gene_id "XLOC_015125"; transcript_id "TCONS_00025568"; exon_number |  |
| "4"; oId "CUFF.27115.8"; tss_id "TSS19188";  |   |   |   |                                                                    |  |
| chr14 Cufflinks exon53977443 53977597        | . | + | . | gene_id "XLOC_015125"; transcript_id "TCONS_00025568"; exon_number |  |
| "5"; oId "CUFF.27115.8"; tss_id "TSS19188";  |   |   |   |                                                                    |  |
| chr14 Cufflinks exon53982739 53982863        | . | + | . | gene_id "XLOC_015125"; transcript_id "TCONS_00025568"; exon_number |  |
| "6"; oId "CUFF.27115.8"; tss_id "TSS19188";  |   |   |   |                                                                    |  |
| chr14 Cufflinks exon53992529 54008758        | . | + | . | gene_id "XLOC_015125"; transcript_id "TCONS_00025568"; exon_number |  |
| "7"; oId "CUFF.27115.8"; tss_id "TSS19188";  |   |   |   |                                                                    |  |
| chr14 Cufflinks exon53684303 53684773        | . | + | . | gene_id "XLOC_015125"; transcript_id "TCONS_00025567"; exon_number |  |
| "1"; oId "CUFF.27115.7"; tss_id "TSS19188";  |   |   |   |                                                                    |  |
| chr14 Cufflinks exon53780434 53780508        | . | + | . | gene_id "XLOC_015125"; transcript_id "TCONS_00025567"; exon_number |  |
| "2"; oId "CUFF.27115.7"; tss_id "TSS19188";  |   |   |   |                                                                    |  |
| chr14 Cufflinks exon53784749 53784856        | . | + | . | gene_id "XLOC_015125"; transcript_id "TCONS_00025567"; exon_number |  |
| "3"; oId "CUFF.27115.7"; tss_id "TSS19188";  |   |   |   |                                                                    |  |
| chr14 Cufflinks exon53836173 53836219        | . | + | . | gene_id "XLOC_015125"; transcript_id "TCONS_00025567"; exon_number |  |
| "4"; oId "CUFF.27115.7"; tss_id "TSS19188";  |   |   |   |                                                                    |  |
| chr14 Cufflinks exon53977443 53977597        | . | + | . | gene_id "XLOC_015125"; transcript_id "TCONS_00025567"; exon_number |  |
| "5"; oId "CUFF.27115.7"; tss_id "TSS19188";  |   |   |   |                                                                    |  |
| chr14 Cufflinks exon53992529 54008758        | . | + | . | gene_id "XLOC_015125"; transcript_id "TCONS_00025567"; exon_number |  |
| "6"; oId "CUFF.27115.7"; tss_id "TSS19188";  |   |   |   |                                                                    |  |
| chr14 Cufflinks exon53684337 53684773        | . | + | . | gene_id "XLOC_015125"; transcript_id "TCONS_00025569"; exon_number |  |
| "1"; oId "CUFF.27115.10"; tss_id "TSS19188"; |   |   |   |                                                                    |  |



|       |                        |          |   |   |   |                                                                                                                 |
|-------|------------------------|----------|---|---|---|-----------------------------------------------------------------------------------------------------------------|
| chr14 | Cufflinks exon53780434 | 53780508 | . | + | . | gene_id "XLOC_015125"; transcript_id "TCONS_00025569"; exon_number "2"; oId "CUFF.27115.10"; tss_id "TSS19188"; |
| chr14 | Cufflinks exon53784749 | 53784856 | . | + | . | gene_id "XLOC_015125"; transcript_id "TCONS_00025569"; exon_number "3"; oId "CUFF.27115.10"; tss_id "TSS19188"; |
| chr14 | Cufflinks exon53992529 | 53993127 | . | + | . | gene_id "XLOC_015125"; transcript_id "TCONS_00025569"; exon_number "4"; oId "CUFF.27115.10"; tss_id "TSS19188"; |
| chr14 | Cufflinks exon53995309 | 54008758 | . | + | . | gene_id "XLOC_015125"; transcript_id "TCONS_00025569"; exon_number "5"; oId "CUFF.27115.10"; tss_id "TSS19188"; |
| chr14 | Cufflinks exon53684343 | 53684773 | . | + | . | gene_id "XLOC_015125"; transcript_id "TCONS_00025570"; exon_number "1"; oId "CUFF.27115.15"; tss_id "TSS19188"; |
| chr14 | Cufflinks exon53780434 | 53780508 | . | + | . | gene_id "XLOC_015125"; transcript_id "TCONS_00025570"; exon_number "2"; oId "CUFF.27115.15"; tss_id "TSS19188"; |
| chr14 | Cufflinks exon53836173 | 53836219 | . | + | . | gene_id "XLOC_015125"; transcript_id "TCONS_00025570"; exon_number "3"; oId "CUFF.27115.15"; tss_id "TSS19188"; |
| chr14 | Cufflinks exon53977443 | 53977597 | . | + | . | gene_id "XLOC_015125"; transcript_id "TCONS_00025570"; exon_number "4"; oId "CUFF.27115.15"; tss_id "TSS19188"; |
| chr14 | Cufflinks exon54001724 | 54008758 | . | + | . | gene_id "XLOC_015125"; transcript_id "TCONS_00025570"; exon_number "5"; oId "CUFF.27115.15"; tss_id "TSS19188"; |
| chr14 | Cufflinks exon53684343 | 53684773 | . | + | . | gene_id "XLOC_015125"; transcript_id "TCONS_00025572"; exon_number "1"; oId "CUFF.27115.14"; tss_id "TSS19188"; |
| chr14 | Cufflinks exon53780434 | 53780556 | . | + | . | gene_id "XLOC_015125"; transcript_id "TCONS_00025572"; exon_number "2"; oId "CUFF.27115.14"; tss_id "TSS19188"; |
| chr14 | Cufflinks exon53784749 | 53784856 | . | + | . | gene_id "XLOC_015125"; transcript_id "TCONS_00025572"; exon_number "3"; oId "CUFF.27115.14"; tss_id "TSS19188"; |
| chr14 | Cufflinks exon53836173 | 53836219 | . | + | . | gene_id "XLOC_015125"; transcript_id "TCONS_00025572"; exon_number "4"; oId "CUFF.27115.14"; tss_id "TSS19188"; |
| chr14 | Cufflinks exon54041071 | 54041922 | . | + | . | gene_id "XLOC_015125"; transcript_id "TCONS_00025572"; exon_number "5"; oId "CUFF.27115.14"; tss_id "TSS19188"; |
| chr14 | Cufflinks exon53684343 | 53684773 | . | + | . | gene_id "XLOC_015125"; transcript_id "TCONS_00025571"; exon_number "1"; oId "CUFF.27115.12"; tss_id "TSS19188"; |
| chr14 | Cufflinks exon53784749 | 53784856 | . | + | . | gene_id "XLOC_015125"; transcript_id "TCONS_00025571"; exon_number "2"; oId "CUFF.27115.12"; tss_id "TSS19188"; |
| chr14 | Cufflinks exon53836170 | 53836232 | . | + | . | gene_id "XLOC_015125"; transcript_id "TCONS_00025571"; exon_number "3"; oId "CUFF.27115.12"; tss_id "TSS19188"; |
| chr14 | Cufflinks exon54041084 | 54041922 | . | + | . | gene_id "XLOC_015125"; transcript_id "TCONS_00025571"; exon_number "4"; oId "CUFF.27115.12"; tss_id "TSS19188"; |
| chr14 | Cufflinks exon53782392 | 53782488 | . | + | . | gene_id "XLOC_015125"; transcript_id "TCONS_00025573"; exon_number "1"; oId "CUFF.27115.17"; tss_id "TSS19189"; |
| chr14 | Cufflinks exon53784749 | 53784856 | . | + | . | gene_id "XLOC_015125"; transcript_id "TCONS_00025573"; exon_number "2"; oId "CUFF.27115.17"; tss_id "TSS19189"; |
| chr14 | Cufflinks exon53836170 | 53836219 | . | + | . | gene_id "XLOC_015125"; transcript_id "TCONS_00025573"; exon_number "3"; oId "CUFF.27115.17"; tss_id "TSS19189"; |
| chr14 | Cufflinks exon53907720 | 53908941 | . | + | . | gene_id "XLOC_015125"; transcript_id "TCONS_00025573"; exon_number "4"; oId "CUFF.27115.17"; tss_id "TSS19189"; |

|                                              |   |   |   |                                                                    |  |
|----------------------------------------------|---|---|---|--------------------------------------------------------------------|--|
| "4"; oId "CUFF.27115.17"; tss_id "TSS19189"; |   |   |   |                                                                    |  |
| chr14 Cufflinks exon54151893 54151945        | . | + | . | gene_id "XLOC_015183"; transcript_id "TCONS_00025631"; exon_number |  |
| "1"; oId "CUFF.27115.20"; tss_id "TSS19247"; |   |   |   |                                                                    |  |
| chr14 Cufflinks exon54153920 54154092        | . | + | . | gene_id "XLOC_015183"; transcript_id "TCONS_00025631"; exon_number |  |
| "2"; oId "CUFF.27115.20"; tss_id "TSS19247"; |   |   |   |                                                                    |  |
| chr14 Cufflinks exon54185830 54185926        | . | + | . | gene_id "XLOC_015183"; transcript_id "TCONS_00025631"; exon_number |  |
| "3"; oId "CUFF.27115.20"; tss_id "TSS19247"; |   |   |   |                                                                    |  |
| chr14 Cufflinks exon54151893 54151945        | . | + | . | gene_id "XLOC_015183"; transcript_id "TCONS_00025632"; exon_number |  |
| "1"; oId "CUFF.27115.19"; tss_id "TSS19247"; |   |   |   |                                                                    |  |
| chr14 Cufflinks exon54153920 54154092        | . | + | . | gene_id "XLOC_015183"; transcript_id "TCONS_00025632"; exon_number |  |
| "2"; oId "CUFF.27115.19"; tss_id "TSS19247"; |   |   |   |                                                                    |  |
| chr14 Cufflinks exon54173070 54173168        | . | + | . | gene_id "XLOC_015183"; transcript_id "TCONS_00025632"; exon_number |  |
| "3"; oId "CUFF.27115.19"; tss_id "TSS19247"; |   |   |   |                                                                    |  |
| chr14 Cufflinks exon54204389 54204754        | . | + | . | gene_id "XLOC_015183"; transcript_id "TCONS_00025632"; exon_number |  |
| "4"; oId "CUFF.27115.19"; tss_id "TSS19247"; |   |   |   |                                                                    |  |
| chr14 Cufflinks exon60789943 60789994        | . | + | . | gene_id "XLOC_015295"; transcript_id "TCONS_00025802"; exon_number |  |
| "1"; oId "CUFF.27584.1"; tss_id "TSS19386";  |   |   |   |                                                                    |  |
| chr14 Cufflinks exon60794234 60797019        | . | + | . | gene_id "XLOC_015295"; transcript_id "TCONS_00025802"; exon_number |  |
| "2"; oId "CUFF.27584.1"; tss_id "TSS19386";  |   |   |   |                                                                    |  |
| chr14 Cufflinks exon60789946 60789994        | . | + | . | gene_id "XLOC_015295"; transcript_id "TCONS_00025803"; exon_number |  |
| "1"; oId "CUFF.27584.2"; tss_id "TSS19386";  |   |   |   |                                                                    |  |
| chr14 Cufflinks exon60790329 60791034        | . | + | . | gene_id "XLOC_015295"; transcript_id "TCONS_00025803"; exon_number |  |
| "2"; oId "CUFF.27584.2"; tss_id "TSS19386";  |   |   |   |                                                                    |  |
| chr14 Cufflinks exon64108670 64108915        | . | + | . | gene_id "XLOC_015330"; transcript_id "TCONS_00025847"; exon_number |  |
| "1"; oId "CUFF.27696.1"; tss_id "TSS19423";  |   |   |   |                                                                    |  |
| chr14 Cufflinks exon64118050 64118137        | . | + | . | gene_id "XLOC_015330"; transcript_id "TCONS_00025847"; exon_number |  |
| "2"; oId "CUFF.27696.1"; tss_id "TSS19423";  |   |   |   |                                                                    |  |
| chr14 Cufflinks exon64142066 64142163        | . | + | . | gene_id "XLOC_015330"; transcript_id "TCONS_00025847"; exon_number |  |
| "3"; oId "CUFF.27696.1"; tss_id "TSS19423";  |   |   |   |                                                                    |  |
| chr14 Cufflinks exon64156810 64156850        | . | + | . | gene_id "XLOC_015330"; transcript_id "TCONS_00025847"; exon_number |  |
| "4"; oId "CUFF.27696.1"; tss_id "TSS19423";  |   |   |   |                                                                    |  |
| chr14 Cufflinks exon71275468 71276004        | . | + | . | gene_id "XLOC_015450"; transcript_id "TCONS_00026005"; exon_number |  |
| "1"; oId "CUFF.28137.1"; tss_id "TSS19558";  |   |   |   |                                                                    |  |
| chr14 Cufflinks exon71276798 71280913        | . | + | . | gene_id "XLOC_015450"; transcript_id "TCONS_00026005"; exon_number |  |
| "2"; oId "CUFF.28137.1"; tss_id "TSS19558";  |   |   |   |                                                                    |  |
| chr14 Cufflinks exon71636015 71636028        | . | + | . | gene_id "XLOC_015455"; transcript_id "TCONS_00026013"; exon_number |  |
| "1"; oId "CUFF.28146.1"; tss_id "TSS19564";  |   |   |   |                                                                    |  |
| chr14 Cufflinks exon71648316 71648819        | . | + | . | gene_id "XLOC_015455"; transcript_id "TCONS_00026013"; exon_number |  |
| "2"; oId "CUFF.28146.1"; tss_id "TSS19564";  |   |   |   |                                                                    |  |
| chr14 Cufflinks exon75593794 75594063        | . | + | . | gene_id "XLOC_015528"; transcript_id "TCONS_00026131"; exon_number |  |
| "1"; oId "CUFF.28407.1"; tss_id "TSS19645";  |   |   |   |                                                                    |  |
| chr14 Cufflinks exon75603475 75603739        | . | + | . | gene_id "XLOC_015528"; transcript_id "TCONS_00026131"; exon_number |  |
| "2"; oId "CUFF.28407.1"; tss_id "TSS19645";  |   |   |   |                                                                    |  |

|       |                        |          |   |   |   |                                                                                                                |
|-------|------------------------|----------|---|---|---|----------------------------------------------------------------------------------------------------------------|
| chr14 | Cufflinks exon83108952 | 83109018 | . | + | . | gene_id "XLOC_015670"; transcript_id "TCONS_00026309"; exon_number "1"; oId "CUFF.28713.1"; tss_id "TSS19804"; |
| chr14 | Cufflinks exon83117268 | 83117340 | . | + | . | gene_id "XLOC_015670"; transcript_id "TCONS_00026309"; exon_number "2"; oId "CUFF.28713.1"; tss_id "TSS19804"; |
| chr14 | Cufflinks exon83151724 | 83151775 | . | + | . | gene_id "XLOC_015670"; transcript_id "TCONS_00026309"; exon_number "3"; oId "CUFF.28713.1"; tss_id "TSS19804"; |
| chr14 | Cufflinks exon83153658 | 83153713 | . | + | . | gene_id "XLOC_015670"; transcript_id "TCONS_00026309"; exon_number "4"; oId "CUFF.28713.1"; tss_id "TSS19804"; |
| chr14 | Cufflinks exon83161134 | 83162211 | . | + | . | gene_id "XLOC_015670"; transcript_id "TCONS_00026309"; exon_number "5"; oId "CUFF.28713.1"; tss_id "TSS19804"; |
| chr14 | Cufflinks exon83108973 | 83109145 | . | + | . | gene_id "XLOC_015670"; transcript_id "TCONS_00026310"; exon_number "1"; oId "CUFF.28713.2"; tss_id "TSS19804"; |
| chr14 | Cufflinks exon83117268 | 83117340 | . | + | . | gene_id "XLOC_015670"; transcript_id "TCONS_00026310"; exon_number "2"; oId "CUFF.28713.2"; tss_id "TSS19804"; |
| chr14 | Cufflinks exon83153658 | 83153713 | . | + | . | gene_id "XLOC_015670"; transcript_id "TCONS_00026310"; exon_number "3"; oId "CUFF.28713.2"; tss_id "TSS19804"; |
| chr14 | Cufflinks exon83161134 | 83162211 | . | + | . | gene_id "XLOC_015670"; transcript_id "TCONS_00026310"; exon_number "4"; oId "CUFF.28713.2"; tss_id "TSS19804"; |
| chr14 | Cufflinks exon86406795 | 86406805 | . | + | . | gene_id "XLOC_015688"; transcript_id "TCONS_00026328"; exon_number "1"; oId "CUFF.28744.2"; tss_id "TSS19822"; |
| chr14 | Cufflinks exon86537225 | 86537311 | . | + | . | gene_id "XLOC_015688"; transcript_id "TCONS_00026328"; exon_number "2"; oId "CUFF.28744.2"; tss_id "TSS19822"; |
| chr14 | Cufflinks exon86594294 | 86595125 | . | + | . | gene_id "XLOC_015688"; transcript_id "TCONS_00026328"; exon_number "3"; oId "CUFF.28744.2"; tss_id "TSS19822"; |
| chr14 | Cufflinks exon86595848 | 86596804 | . | + | . | gene_id "XLOC_015688"; transcript_id "TCONS_00026328"; exon_number "4"; oId "CUFF.28744.2"; tss_id "TSS19822"; |
| chr14 | Cufflinks exon86594821 | 86595117 | . | + | . | gene_id "XLOC_015688"; transcript_id "TCONS_00026330"; exon_number "1"; oId "CUFF.28744.3"; tss_id "TSS19823"; |
| chr14 | Cufflinks exon86595840 | 86596804 | . | + | . | gene_id "XLOC_015688"; transcript_id "TCONS_00026330"; exon_number "2"; oId "CUFF.28744.3"; tss_id "TSS19823"; |
| chr14 | Cufflinks exon91696973 | 91701217 | . | + | . | gene_id "XLOC_015715"; transcript_id "TCONS_00026378"; exon_number "1"; oId "CUFF.28833.2"; tss_id "TSS19854"; |
| chr14 | Cufflinks exon91701629 | 91703882 | . | + | . | gene_id "XLOC_015715"; transcript_id "TCONS_00026378"; exon_number "2"; oId "CUFF.28833.2"; tss_id "TSS19854"; |
| chr14 | Cufflinks exon96087269 | 96087370 | . | + | . | gene_id "XLOC_015767"; transcript_id "TCONS_00026453"; exon_number "1"; oId "CUFF.29043.1"; tss_id "TSS19911"; |
| chr14 | Cufflinks exon96118434 | 96118563 | . | + | . | gene_id "XLOC_015767"; transcript_id "TCONS_00026453"; exon_number "2"; oId "CUFF.29043.1"; tss_id "TSS19911"; |
| chr14 | Cufflinks exon96118714 | 96118826 | . | + | . | gene_id "XLOC_015767"; transcript_id "TCONS_00026453"; exon_number "3"; oId "CUFF.29043.1"; tss_id "TSS19911"; |
| chr14 | Cufflinks exon96120846 | 96120963 | . | + | . | gene_id "XLOC_015767"; transcript_id "TCONS_00026453"; exon_number "4"; oId "CUFF.29043.1"; tss_id "TSS19911"; |
| chr14 | Cufflinks exon96129593 | 96131413 | . | + | . | gene_id "XLOC_015767"; transcript_id "TCONS_00026453"; exon_number "1"; oId "CUFF.29043.1"; tss_id "TSS19911"; |

|                                             |   |   |   |                                                                    |  |
|---------------------------------------------|---|---|---|--------------------------------------------------------------------|--|
| "5"; oId "CUFF.29043.1"; tss_id "TSS19911"; |   |   |   |                                                                    |  |
| chr14 Cufflinks exon96134463 96136654       | . | + | . | gene_id "XLOC_015767"; transcript_id "TCONS_00026453"; exon_number |  |
| "6"; oId "CUFF.29043.1"; tss_id "TSS19911"; |   |   |   |                                                                    |  |
| chr14 Cufflinks exon96117515 96118563       | . | + | . | gene_id "XLOC_015767"; transcript_id "TCONS_00026454"; exon_number |  |
| "1"; oId "CUFF.29043.2"; tss_id "TSS19912"; |   |   |   |                                                                    |  |
| chr14 Cufflinks exon96118714 96118826       | . | + | . | gene_id "XLOC_015767"; transcript_id "TCONS_00026454"; exon_number |  |
| "2"; oId "CUFF.29043.2"; tss_id "TSS19912"; |   |   |   |                                                                    |  |
| chr14 Cufflinks exon96120846 96120963       | . | + | . | gene_id "XLOC_015767"; transcript_id "TCONS_00026454"; exon_number |  |
| "3"; oId "CUFF.29043.2"; tss_id "TSS19912"; |   |   |   |                                                                    |  |
| chr14 Cufflinks exon96128817 96129001       | . | + | . | gene_id "XLOC_015767"; transcript_id "TCONS_00026454"; exon_number |  |
| "4"; oId "CUFF.29043.2"; tss_id "TSS19912"; |   |   |   |                                                                    |  |
| chr14 Cufflinks exon96135888 96135954       | . | + | . | gene_id "XLOC_015767"; transcript_id "TCONS_00026454"; exon_number |  |
| "5"; oId "CUFF.29043.2"; tss_id "TSS19912"; |   |   |   |                                                                    |  |
| chr14 Cufflinks exon96136779 96136914       | . | + | . | gene_id "XLOC_015767"; transcript_id "TCONS_00026454"; exon_number |  |
| "6"; oId "CUFF.29043.2"; tss_id "TSS19912"; |   |   |   |                                                                    |  |
| chr14 Cufflinks exon96137668 96137824       | . | + | . | gene_id "XLOC_015767"; transcript_id "TCONS_00026454"; exon_number |  |
| "7"; oId "CUFF.29043.2"; tss_id "TSS19912"; |   |   |   |                                                                    |  |
| chr14 Cufflinks exon96138308 96139789       | . | + | . | gene_id "XLOC_015767"; transcript_id "TCONS_00026454"; exon_number |  |
| "8"; oId "CUFF.29043.2"; tss_id "TSS19912"; |   |   |   |                                                                    |  |
| chr14 Cufflinks exon97398035 97408903       | . | + | . | gene_id "XLOC_015795"; transcript_id "TCONS_00026501"; exon_number |  |
| "1"; oId "CUFF.29102.1"; tss_id "TSS19944"; |   |   |   |                                                                    |  |
| chr14 Cufflinks exon97409854 97410017       | . | + | . | gene_id "XLOC_015795"; transcript_id "TCONS_00026501"; exon_number |  |
| "2"; oId "CUFF.29102.1"; tss_id "TSS19944"; |   |   |   |                                                                    |  |
| chr14 Cufflinks exon97411386 97411487       | . | + | . | gene_id "XLOC_015795"; transcript_id "TCONS_00026501"; exon_number |  |
| "3"; oId "CUFF.29102.1"; tss_id "TSS19944"; |   |   |   |                                                                    |  |
| chr14 Cufflinks exon97411575 97434600       | . | + | . | gene_id "XLOC_015795"; transcript_id "TCONS_00026501"; exon_number |  |
| "4"; oId "CUFF.29102.1"; tss_id "TSS19944"; |   |   |   |                                                                    |  |
| chr14 Cufflinks exon97417898 97419772       | . | + | . | gene_id "XLOC_015795"; transcript_id "TCONS_00026502"; exon_number |  |
| "1"; oId "CUFF.29102.3"; tss_id "TSS19945"; |   |   |   |                                                                    |  |
| chr14 Cufflinks exon97420820 97434600       | . | + | . | gene_id "XLOC_015795"; transcript_id "TCONS_00026502"; exon_number |  |
| "2"; oId "CUFF.29102.3"; tss_id "TSS19945"; |   |   |   |                                                                    |  |
| chr14 Cufflinks exon97925153 97925264       | . | + | . | gene_id "XLOC_015815"; transcript_id "TCONS_00026524"; exon_number |  |
| "1"; oId "CUFF.29132.5"; tss_id "TSS19965"; |   |   |   |                                                                    |  |
| chr14 Cufflinks exon97928141 97928669       | . | + | . | gene_id "XLOC_015815"; transcript_id "TCONS_00026524"; exon_number |  |
| "2"; oId "CUFF.29132.5"; tss_id "TSS19965"; |   |   |   |                                                                    |  |
| chr14 Cufflinks exon97929969 97932955       | . | + | . | gene_id "XLOC_015815"; transcript_id "TCONS_00026524"; exon_number |  |
| "3"; oId "CUFF.29132.5"; tss_id "TSS19965"; |   |   |   |                                                                    |  |
| chr14 Cufflinks exon97933776 97935393       | . | + | . | gene_id "XLOC_015815"; transcript_id "TCONS_00026524"; exon_number |  |
| "4"; oId "CUFF.29132.5"; tss_id "TSS19965"; |   |   |   |                                                                    |  |
| chr14 Cufflinks exon97925153 97925264       | . | + | . | gene_id "XLOC_015815"; transcript_id "TCONS_00026523"; exon_number |  |
| "1"; oId "CUFF.29132.4"; tss_id "TSS19965"; |   |   |   |                                                                    |  |
| chr14 Cufflinks exon97928141 97932955       | . | + | . | gene_id "XLOC_015815"; transcript_id "TCONS_00026523"; exon_number |  |
| "2"; oId "CUFF.29132.4"; tss_id "TSS19965"; |   |   |   |                                                                    |  |

|       |                |           |           |   |   |   |                                                                                                                |
|-------|----------------|-----------|-----------|---|---|---|----------------------------------------------------------------------------------------------------------------|
| chr14 | Cufflinks exon | 97933776  | 97935393  | . | + | . | gene_id "XLOC_015815"; transcript_id "TCONS_00026523"; exon_number "3"; oId "CUFF.29132.4"; tss_id "TSS19965"; |
| chr14 | Cufflinks exon | 97925153  | 97925264  | . | + | . | gene_id "XLOC_015815"; transcript_id "TCONS_00026522"; exon_number "1"; oId "CUFF.29132.2"; tss_id "TSS19965"; |
| chr14 | Cufflinks exon | 97932833  | 97932955  | . | + | . | gene_id "XLOC_015815"; transcript_id "TCONS_00026522"; exon_number "2"; oId "CUFF.29132.2"; tss_id "TSS19965"; |
| chr14 | Cufflinks exon | 97933776  | 97935393  | . | + | . | gene_id "XLOC_015815"; transcript_id "TCONS_00026522"; exon_number "3"; oId "CUFF.29132.2"; tss_id "TSS19965"; |
| chr14 | Cufflinks exon | 98601996  | 98602534  | . | + | . | gene_id "XLOC_015827"; transcript_id "TCONS_00026538"; exon_number "1"; oId "CUFF.29204.1"; tss_id "TSS19979"; |
| chr14 | Cufflinks exon | 98605330  | 98606203  | . | + | . | gene_id "XLOC_015827"; transcript_id "TCONS_00026538"; exon_number "2"; oId "CUFF.29204.1"; tss_id "TSS19979"; |
| chr14 | Cufflinks exon | 98601996  | 98602534  | . | + | . | gene_id "XLOC_015827"; transcript_id "TCONS_00026539"; exon_number "1"; oId "CUFF.29204.2"; tss_id "TSS19979"; |
| chr14 | Cufflinks exon | 98628783  | 98630020  | . | + | . | gene_id "XLOC_015827"; transcript_id "TCONS_00026539"; exon_number "2"; oId "CUFF.29204.2"; tss_id "TSS19979"; |
| chr14 | Cufflinks exon | 98602331  | 98602534  | . | + | . | gene_id "XLOC_015827"; transcript_id "TCONS_00026540"; exon_number "1"; oId "CUFF.29204.3"; tss_id "TSS19980"; |
| chr14 | Cufflinks exon | 98605330  | 98605647  | . | + | . | gene_id "XLOC_015827"; transcript_id "TCONS_00026540"; exon_number "2"; oId "CUFF.29204.3"; tss_id "TSS19980"; |
| chr14 | Cufflinks exon | 98628783  | 98630020  | . | + | . | gene_id "XLOC_015827"; transcript_id "TCONS_00026540"; exon_number "3"; oId "CUFF.29204.3"; tss_id "TSS19980"; |
| chr14 | Cufflinks exon | 98883396  | 98883732  | . | + | . | gene_id "XLOC_015842"; transcript_id "TCONS_00026555"; exon_number "1"; oId "CUFF.29281.1"; tss_id "TSS19995"; |
| chr14 | Cufflinks exon | 98883826  | 98884963  | . | + | . | gene_id "XLOC_015842"; transcript_id "TCONS_00026555"; exon_number "2"; oId "CUFF.29281.1"; tss_id "TSS19995"; |
| chr14 | Cufflinks exon | 101586241 | 101586259 | . | + | . | gene_id "XLOC_015896"; transcript_id "TCONS_00026627"; exon_number "1"; oId "CUFF.29537.1"; tss_id "TSS20057"; |
| chr14 | Cufflinks exon | 101587000 | 101587481 | . | + | . | gene_id "XLOC_015896"; transcript_id "TCONS_00026627"; exon_number "2"; oId "CUFF.29537.1"; tss_id "TSS20057"; |
| chr14 | Cufflinks exon | 101589226 | 101596690 | . | + | . | gene_id "XLOC_015896"; transcript_id "TCONS_00026627"; exon_number "3"; oId "CUFF.29537.1"; tss_id "TSS20057"; |
| chr14 | Cufflinks exon | 104338433 | 104340283 | . | + | . | gene_id "XLOC_015955"; transcript_id "TCONS_00026723"; exon_number "1"; oId "CUFF.29695.1"; tss_id "TSS20125"; |
| chr14 | Cufflinks exon | 104340941 | 104341341 | . | + | . | gene_id "XLOC_015955"; transcript_id "TCONS_00026723"; exon_number "2"; oId "CUFF.29695.1"; tss_id "TSS20125"; |
| chr14 | Cufflinks exon | 104343732 | 104344145 | . | + | . | gene_id "XLOC_015955"; transcript_id "TCONS_00026723"; exon_number "3"; oId "CUFF.29695.1"; tss_id "TSS20125"; |
| chr14 | Cufflinks exon | 104338433 | 104339798 | . | + | . | gene_id "XLOC_015955"; transcript_id "TCONS_00026724"; exon_number "1"; oId "CUFF.29695.2"; tss_id "TSS20125"; |
| chr14 | Cufflinks exon | 104345741 | 104346740 | . | + | . | gene_id "XLOC_015955"; transcript_id "TCONS_00026724"; exon_number "2"; oId "CUFF.29695.2"; tss_id "TSS20125"; |
| chr14 | Cufflinks exon | 104338434 | 104339798 | . | + | . | gene_id "XLOC_015955"; transcript_id "TCONS_00026725"; exon_number "1"; oId "CUFF.29695.2"; tss_id "TSS20125"; |

|                                             |   |   |   |                                                                    |  |
|---------------------------------------------|---|---|---|--------------------------------------------------------------------|--|
| "1"; oId "CUFF.29695.3"; tss_id "TSS20125"; |   |   |   |                                                                    |  |
| chr14 Cufflinks exon104343732 104343932     | . | + | . | gene_id "XLOC_015955"; transcript_id "TCONS_00026725"; exon_number |  |
| "2"; oId "CUFF.29695.3"; tss_id "TSS20125"; |   |   |   |                                                                    |  |
| chr14 Cufflinks exon104345741 104346740     | . | + | . | gene_id "XLOC_015955"; transcript_id "TCONS_00026725"; exon_number |  |
| "3"; oId "CUFF.29695.3"; tss_id "TSS20125"; |   |   |   |                                                                    |  |
| chr14 Cufflinks exon104338445 104339502     | . | + | . | gene_id "XLOC_015955"; transcript_id "TCONS_00026726"; exon_number |  |
| "1"; oId "CUFF.29695.4"; tss_id "TSS20125"; |   |   |   |                                                                    |  |
| chr14 Cufflinks exon104345741 104346740     | . | + | . | gene_id "XLOC_015955"; transcript_id "TCONS_00026726"; exon_number |  |
| "2"; oId "CUFF.29695.4"; tss_id "TSS20125"; |   |   |   |                                                                    |  |
| chr14 Cufflinks exon104338556 104338967     | . | + | . | gene_id "XLOC_015955"; transcript_id "TCONS_00026727"; exon_number |  |
| "1"; oId "CUFF.29695.5"; tss_id "TSS20126"; |   |   |   |                                                                    |  |
| chr14 Cufflinks exon104339385 104339798     | . | + | . | gene_id "XLOC_015955"; transcript_id "TCONS_00026727"; exon_number |  |
| "2"; oId "CUFF.29695.5"; tss_id "TSS20126"; |   |   |   |                                                                    |  |
| chr14 Cufflinks exon104345741 104346740     | . | + | . | gene_id "XLOC_015955"; transcript_id "TCONS_00026727"; exon_number |  |
| "3"; oId "CUFF.29695.5"; tss_id "TSS20126"; |   |   |   |                                                                    |  |
| chr14 Cufflinks exon104338584 104338614     | . | + | . | gene_id "XLOC_015955"; transcript_id "TCONS_00026728"; exon_number |  |
| "1"; oId "CUFF.29695.6"; tss_id "TSS20126"; |   |   |   |                                                                    |  |
| chr14 Cufflinks exon104345741 104346740     | . | + | . | gene_id "XLOC_015955"; transcript_id "TCONS_00026728"; exon_number |  |
| "2"; oId "CUFF.29695.6"; tss_id "TSS20126"; |   |   |   |                                                                    |  |
| chr14 Cufflinks exon104339838 104341341     | . | + | . | gene_id "XLOC_015955"; transcript_id "TCONS_00026729"; exon_number |  |
| "1"; oId "CUFF.29695.7"; tss_id "TSS20127"; |   |   |   |                                                                    |  |
| chr14 Cufflinks exon104343732 104343932     | . | + | . | gene_id "XLOC_015955"; transcript_id "TCONS_00026729"; exon_number |  |
| "2"; oId "CUFF.29695.7"; tss_id "TSS20127"; |   |   |   |                                                                    |  |
| chr14 Cufflinks exon104345741 104346740     | . | + | . | gene_id "XLOC_015955"; transcript_id "TCONS_00026729"; exon_number |  |
| "3"; oId "CUFF.29695.7"; tss_id "TSS20127"; |   |   |   |                                                                    |  |
| chr14 Cufflinks exon104342434 104343932     | . | + | . | gene_id "XLOC_015955"; transcript_id "TCONS_00026730"; exon_number |  |
| "1"; oId "CUFF.29695.8"; tss_id "TSS20128"; |   |   |   |                                                                    |  |
| chr14 Cufflinks exon104345741 104346740     | . | + | . | gene_id "XLOC_015955"; transcript_id "TCONS_00026730"; exon_number |  |
| "2"; oId "CUFF.29695.8"; tss_id "TSS20128"; |   |   |   |                                                                    |  |
| chr14 Cufflinks exon105233391 105233566     | . | + | . | gene_id "XLOC_015975"; transcript_id "TCONS_00026767"; exon_number |  |
| "1"; oId "CUFF.29740.1"; tss_id "TSS20158"; |   |   |   |                                                                    |  |
| chr14 Cufflinks exon105234201 105234344     | . | + | . | gene_id "XLOC_015975"; transcript_id "TCONS_00026767"; exon_number |  |
| "2"; oId "CUFF.29740.1"; tss_id "TSS20158"; |   |   |   |                                                                    |  |
| chr14 Cufflinks exon105234729 105236561     | . | + | . | gene_id "XLOC_015975"; transcript_id "TCONS_00026767"; exon_number |  |
| "3"; oId "CUFF.29740.1"; tss_id "TSS20158"; |   |   |   |                                                                    |  |
| chr14 Cufflinks exon105559723 105562105     | . | + | . | gene_id "XLOC_015989"; transcript_id "TCONS_00026793"; exon_number |  |
| "1"; oId "CUFF.29789.3"; tss_id "TSS20175"; |   |   |   |                                                                    |  |
| chr14 Cufflinks exon105564810 105564910     | . | + | . | gene_id "XLOC_015989"; transcript_id "TCONS_00026793"; exon_number |  |
| "2"; oId "CUFF.29789.3"; tss_id "TSS20175"; |   |   |   |                                                                    |  |
| chr14 Cufflinks exon105565056 105565227     | . | + | . | gene_id "XLOC_015989"; transcript_id "TCONS_00026793"; exon_number |  |
| "3"; oId "CUFF.29789.3"; tss_id "TSS20175"; |   |   |   |                                                                    |  |
| chr14 Cufflinks exon105565619 105566065     | . | + | . | gene_id "XLOC_015989"; transcript_id "TCONS_00026793"; exon_number |  |
| "4"; oId "CUFF.29789.3"; tss_id "TSS20175"; |   |   |   |                                                                    |  |

|       |                |           |           |   |   |   |                                                                                                                |
|-------|----------------|-----------|-----------|---|---|---|----------------------------------------------------------------------------------------------------------------|
| chr14 | Cufflinks exon | 105559834 | 105561779 | . | + | . | gene_id "XLOC_015989"; transcript_id "TCONS_00026794"; exon_number "1"; oId "CUFF.29789.5"; tss_id "TSS20176"; |
| chr14 | Cufflinks exon | 105561877 | 105562105 | . | + | . | gene_id "XLOC_015989"; transcript_id "TCONS_00026794"; exon_number "2"; oId "CUFF.29789.5"; tss_id "TSS20176"; |
| chr14 | Cufflinks exon | 105564810 | 105564910 | . | + | . | gene_id "XLOC_015989"; transcript_id "TCONS_00026794"; exon_number "3"; oId "CUFF.29789.5"; tss_id "TSS20176"; |
| chr14 | Cufflinks exon | 105565056 | 105565227 | . | + | . | gene_id "XLOC_015989"; transcript_id "TCONS_00026794"; exon_number "4"; oId "CUFF.29789.5"; tss_id "TSS20176"; |
| chr14 | Cufflinks exon | 105565381 | 105565546 | . | + | . | gene_id "XLOC_015989"; transcript_id "TCONS_00026794"; exon_number "5"; oId "CUFF.29789.5"; tss_id "TSS20176"; |
| chr14 | Cufflinks exon | 105559834 | 105560553 | . | + | . | gene_id "XLOC_015989"; transcript_id "TCONS_00026795"; exon_number "1"; oId "CUFF.29789.6"; tss_id "TSS20176"; |
| chr14 | Cufflinks exon | 105561664 | 105561779 | . | + | . | gene_id "XLOC_015989"; transcript_id "TCONS_00026795"; exon_number "2"; oId "CUFF.29789.6"; tss_id "TSS20176"; |
| chr14 | Cufflinks exon | 105561877 | 105562105 | . | + | . | gene_id "XLOC_015989"; transcript_id "TCONS_00026795"; exon_number "3"; oId "CUFF.29789.6"; tss_id "TSS20176"; |
| chr14 | Cufflinks exon | 105564810 | 105564910 | . | + | . | gene_id "XLOC_015989"; transcript_id "TCONS_00026795"; exon_number "4"; oId "CUFF.29789.6"; tss_id "TSS20176"; |
| chr14 | Cufflinks exon | 105565056 | 105565227 | . | + | . | gene_id "XLOC_015989"; transcript_id "TCONS_00026795"; exon_number "5"; oId "CUFF.29789.6"; tss_id "TSS20176"; |
| chr14 | Cufflinks exon | 105565619 | 105566065 | . | + | . | gene_id "XLOC_015989"; transcript_id "TCONS_00026795"; exon_number "6"; oId "CUFF.29789.6"; tss_id "TSS20176"; |
| chr14 | Cufflinks exon | 105998192 | 105998856 | . | + | . | gene_id "XLOC_016010"; transcript_id "TCONS_00026834"; exon_number "1"; oId "CUFF.29825.1"; tss_id "TSS20204"; |
| chr14 | Cufflinks exon | 105999306 | 106000654 | . | + | . | gene_id "XLOC_016010"; transcript_id "TCONS_00026834"; exon_number "2"; oId "CUFF.29825.1"; tss_id "TSS20204"; |
| chr14 | Cufflinks exon | 106771334 | 106771666 | . | + | . | gene_id "XLOC_016018"; transcript_id "TCONS_00026878"; exon_number "1"; oId "CUFF.29847.3"; tss_id "TSS20217"; |
| chr14 | Cufflinks exon | 106771783 | 106771896 | . | + | . | gene_id "XLOC_016018"; transcript_id "TCONS_00026878"; exon_number "2"; oId "CUFF.29847.3"; tss_id "TSS20217"; |
| chr14 | Cufflinks exon | 106772248 | 106772679 | . | + | . | gene_id "XLOC_016018"; transcript_id "TCONS_00026878"; exon_number "3"; oId "CUFF.29847.3"; tss_id "TSS20217"; |
| chr14 | Cufflinks exon | 106608027 | 106608123 | . | + | . | gene_id "XLOC_016022"; transcript_id "TCONS_00026864"; exon_number "1"; oId "CUFF.29856.9"; tss_id "TSS20223"; |
| chr14 | Cufflinks exon | 106626375 | 106626507 | . | + | . | gene_id "XLOC_016022"; transcript_id "TCONS_00026864"; exon_number "2"; oId "CUFF.29856.9"; tss_id "TSS20223"; |
| chr14 | Cufflinks exon | 106626810 | 106630768 | . | + | . | gene_id "XLOC_016022"; transcript_id "TCONS_00026864"; exon_number "3"; oId "CUFF.29856.9"; tss_id "TSS20223"; |
| chr14 | Cufflinks exon | 106727755 | 106728742 | . | + | . | gene_id "XLOC_016038"; transcript_id "TCONS_00026875"; exon_number "1"; oId "CUFF.29898.1"; tss_id "TSS20240"; |
| chr14 | Cufflinks exon | 106731124 | 106731336 | . | + | . | gene_id "XLOC_016038"; transcript_id "TCONS_00026875"; exon_number "2"; oId "CUFF.29898.1"; tss_id "TSS20240"; |
| chr14 | Cufflinks exon | 106733043 | 106736438 | . | + | . | gene_id "XLOC_016038"; transcript_id "TCONS_00026875"; exon_number "3"; oId "CUFF.29898.1"; tss_id "TSS20240"; |

|                                             |                         |           |   |   |   |                                                                    |
|---------------------------------------------|-------------------------|-----------|---|---|---|--------------------------------------------------------------------|
| chr14                                       | Cufflinks exon106938445 | 106938644 | . | + | . | gene_id "XLOC_016047"; transcript_id "TCONS_00026885"; exon_number |
| "1"; oId "CUFF.29984.1"; tss_id "TSS20249"; |                         |           |   |   |   |                                                                    |
| chr14                                       | Cufflinks exon107131043 | 107131094 | . | + | . | gene_id "XLOC_016047"; transcript_id "TCONS_00026885"; exon_number |
| "2"; oId "CUFF.29984.1"; tss_id "TSS20249"; |                         |           |   |   |   |                                                                    |
| chr14                                       | Cufflinks exon30796231  | 30797618  | . | - | . | gene_id "XLOC_016239"; transcript_id "TCONS_00027189"; exon_number |
| "1"; oId "CUFF.26466.1"; tss_id "TSS20493"; |                         |           |   |   |   |                                                                    |
| chr14                                       | Cufflinks exon30803846  | 30804022  | . | - | . | gene_id "XLOC_016239"; transcript_id "TCONS_00027189"; exon_number |
| "2"; oId "CUFF.26466.1"; tss_id "TSS20493"; |                         |           |   |   |   |                                                                    |
| chr14                                       | Cufflinks exon35406696  | 35407091  | . | - | . | gene_id "XLOC_016274"; transcript_id "TCONS_00027258"; exon_number |
| "1"; oId "CUFF.26594.2"; tss_id "TSS20547"; |                         |           |   |   |   |                                                                    |
| chr14                                       | Cufflinks exon35408014  | 35408482  | . | - | . | gene_id "XLOC_016274"; transcript_id "TCONS_00027258"; exon_number |
| "2"; oId "CUFF.26594.2"; tss_id "TSS20547"; |                         |           |   |   |   |                                                                    |
| chr14                                       | Cufflinks exon50130396  | 50130405  | . | - | . | gene_id "XLOC_016347"; transcript_id "TCONS_00027373"; exon_number |
| "1"; oId "CUFF.26900.1"; tss_id "TSS20634"; |                         |           |   |   |   |                                                                    |
| chr14                                       | Cufflinks exon50326618  | 50328614  | . | - | . | gene_id "XLOC_016347"; transcript_id "TCONS_00027373"; exon_number |
| "2"; oId "CUFF.26900.1"; tss_id "TSS20634"; |                         |           |   |   |   |                                                                    |
| chr14                                       | Cufflinks exon50328852  | 50329034  | . | - | . | gene_id "XLOC_016347"; transcript_id "TCONS_00027373"; exon_number |
| "3"; oId "CUFF.26900.1"; tss_id "TSS20634"; |                         |           |   |   |   |                                                                    |
| chr14                                       | Cufflinks exon50331054  | 50331167  | . | - | . | gene_id "XLOC_016347"; transcript_id "TCONS_00027373"; exon_number |
| "4"; oId "CUFF.26900.1"; tss_id "TSS20634"; |                         |           |   |   |   |                                                                    |
| chr14                                       | Cufflinks exon50334704  | 50334840  | . | - | . | gene_id "XLOC_016347"; transcript_id "TCONS_00027373"; exon_number |
| "5"; oId "CUFF.26900.1"; tss_id "TSS20634"; |                         |           |   |   |   |                                                                    |
| chr14                                       | Cufflinks exon50326152  | 50328614  | . | - | . | gene_id "XLOC_016347"; transcript_id "TCONS_00027377"; exon_number |
| "1"; oId "CUFF.26900.5"; tss_id "TSS20637"; |                         |           |   |   |   |                                                                    |
| chr14                                       | Cufflinks exon50328852  | 50329034  | . | - | . | gene_id "XLOC_016347"; transcript_id "TCONS_00027377"; exon_number |
| "2"; oId "CUFF.26900.5"; tss_id "TSS20637"; |                         |           |   |   |   |                                                                    |
| chr14                                       | Cufflinks exon50329238  | 50330147  | . | - | . | gene_id "XLOC_016347"; transcript_id "TCONS_00027377"; exon_number |
| "3"; oId "CUFF.26900.5"; tss_id "TSS20637"; |                         |           |   |   |   |                                                                    |
| chr14                                       | Cufflinks exon54072322  | 54074342  | . | - | . | gene_id "XLOC_016427"; transcript_id "TCONS_00027503"; exon_number |
| "1"; oId "CUFF.27228.2"; tss_id "TSS20732"; |                         |           |   |   |   |                                                                    |
| chr14                                       | Cufflinks exon54080371  | 54081073  | . | - | . | gene_id "XLOC_016427"; transcript_id "TCONS_00027503"; exon_number |
| "2"; oId "CUFF.27228.2"; tss_id "TSS20732"; |                         |           |   |   |   |                                                                    |
| chr14                                       | Cufflinks exon54151864  | 54153326  | . | - | . | gene_id "XLOC_016432"; transcript_id "TCONS_00027506"; exon_number |
| "1"; oId "CUFF.27116.1"; tss_id "TSS20737"; |                         |           |   |   |   |                                                                    |
| chr14                                       | Cufflinks exon54169713  | 54169831  | . | - | . | gene_id "XLOC_016432"; transcript_id "TCONS_00027506"; exon_number |
| "2"; oId "CUFF.27116.1"; tss_id "TSS20737"; |                         |           |   |   |   |                                                                    |
| chr14                                       | Cufflinks exon55595620  | 55597148  | . | - | . | gene_id "XLOC_016454"; transcript_id "TCONS_00027546"; exon_number |
| "1"; oId "CUFF.27295.1"; tss_id "TSS20765"; |                         |           |   |   |   |                                                                    |
| chr14                                       | Cufflinks exon55613164  | 55614213  | . | - | . | gene_id "XLOC_016454"; transcript_id "TCONS_00027546"; exon_number |
| "2"; oId "CUFF.27295.1"; tss_id "TSS20765"; |                         |           |   |   |   |                                                                    |
| chr14                                       | Cufflinks exon56042875  | 56044097  | . | - | . | gene_id "XLOC_016468"; transcript_id "TCONS_00027563"; exon_number |
| "1"; oId "CUFF.27335.3"; tss_id "TSS20781"; |                         |           |   |   |   |                                                                    |



|       |                                             |          |   |   |   |                                                                    |
|-------|---------------------------------------------|----------|---|---|---|--------------------------------------------------------------------|
| chr14 | Cufflinks exon56045324                      | 56045455 | . | - | . | gene_id "XLOC_016468"; transcript_id "TCONS_00027563"; exon_number |
|       | "2"; oId "CUFF.27335.3"; tss_id "TSS20781"; |          |   |   |   |                                                                    |
| chr14 | Cufflinks exon56046654                      | 56046810 | . | - | . | gene_id "XLOC_016468"; transcript_id "TCONS_00027563"; exon_number |
|       | "3"; oId "CUFF.27335.3"; tss_id "TSS20781"; |          |   |   |   |                                                                    |
| chr14 | Cufflinks exon58167542                      | 58167598 | . | - | . | gene_id "XLOC_016483"; transcript_id "TCONS_00027586"; exon_number |
|       | "1"; oId "CUFF.27463.1"; tss_id "TSS20799"; |          |   |   |   |                                                                    |
| chr14 | Cufflinks exon58448633                      | 58449904 | . | - | . | gene_id "XLOC_016483"; transcript_id "TCONS_00027586"; exon_number |
|       | "2"; oId "CUFF.27463.1"; tss_id "TSS20799"; |          |   |   |   |                                                                    |
| chr14 | Cufflinks exon60384958                      | 60384998 | . | - | . | gene_id "XLOC_016502"; transcript_id "TCONS_00027615"; exon_number |
|       | "1"; oId "CUFF.27540.1"; tss_id "TSS20820"; |          |   |   |   |                                                                    |
| chr14 | Cufflinks exon60385941                      | 60386695 | . | - | . | gene_id "XLOC_016502"; transcript_id "TCONS_00027615"; exon_number |
|       | "2"; oId "CUFF.27540.1"; tss_id "TSS20820"; |          |   |   |   |                                                                    |
| chr14 | Cufflinks exon66479130                      | 66480152 | . | - | . | gene_id "XLOC_016567"; transcript_id "TCONS_00027706"; exon_number |
|       | "1"; oId "CUFF.27810.2"; tss_id "TSS20894"; |          |   |   |   |                                                                    |
| chr14 | Cufflinks exon66530984                      | 66530995 | . | - | . | gene_id "XLOC_016567"; transcript_id "TCONS_00027706"; exon_number |
|       | "2"; oId "CUFF.27810.2"; tss_id "TSS20894"; |          |   |   |   |                                                                    |
| chr14 | Cufflinks exon69239983                      | 69240483 | . | - | . | gene_id "XLOC_016629"; transcript_id "TCONS_00027779"; exon_number |
|       | "1"; oId "CUFF.28011.1"; tss_id "TSS20962"; |          |   |   |   |                                                                    |
| chr14 | Cufflinks exon69246799                      | 69246919 | . | - | . | gene_id "XLOC_016629"; transcript_id "TCONS_00027779"; exon_number |
|       | "2"; oId "CUFF.28011.1"; tss_id "TSS20962"; |          |   |   |   |                                                                    |
| chr14 | Cufflinks exon69268624                      | 69269179 | . | - | . | gene_id "XLOC_016631"; transcript_id "TCONS_00027783"; exon_number |
|       | "1"; oId "CUFF.28014.1"; tss_id "TSS20964"; |          |   |   |   |                                                                    |
| chr14 | Cufflinks exon69273230                      | 69283641 | . | - | . | gene_id "XLOC_016631"; transcript_id "TCONS_00027783"; exon_number |
|       | "2"; oId "CUFF.28014.1"; tss_id "TSS20964"; |          |   |   |   |                                                                    |
| chr14 | Cufflinks exon72977292                      | 72977385 | . | - | . | gene_id "XLOC_016686"; transcript_id "TCONS_00027858"; exon_number |
|       | "1"; oId "CUFF.28219.1"; tss_id "TSS21026"; |          |   |   |   |                                                                    |
| chr14 | Cufflinks exon73012779                      | 73012952 | . | - | . | gene_id "XLOC_016686"; transcript_id "TCONS_00027858"; exon_number |
|       | "2"; oId "CUFF.28219.1"; tss_id "TSS21026"; |          |   |   |   |                                                                    |
| chr14 | Cufflinks exon73019288                      | 73019490 | . | - | . | gene_id "XLOC_016686"; transcript_id "TCONS_00027858"; exon_number |
|       | "3"; oId "CUFF.28219.1"; tss_id "TSS21026"; |          |   |   |   |                                                                    |
| chr14 | Cufflinks exon73029053                      | 73029277 | . | - | . | gene_id "XLOC_016686"; transcript_id "TCONS_00027858"; exon_number |
|       | "4"; oId "CUFF.28219.1"; tss_id "TSS21026"; |          |   |   |   |                                                                    |
| chr14 | Cufflinks exon73061035                      | 73061154 | . | - | . | gene_id "XLOC_016686"; transcript_id "TCONS_00027858"; exon_number |
|       | "5"; oId "CUFF.28219.1"; tss_id "TSS21026"; |          |   |   |   |                                                                    |
| chr14 | Cufflinks exon73007226                      | 73012952 | . | - | . | gene_id "XLOC_016686"; transcript_id "TCONS_00027869"; exon_number |
|       | "1"; oId "CUFF.28219.4"; tss_id "TSS21027"; |          |   |   |   |                                                                    |
| chr14 | Cufflinks exon73019288                      | 73019490 | . | - | . | gene_id "XLOC_016686"; transcript_id "TCONS_00027869"; exon_number |
|       | "2"; oId "CUFF.28219.4"; tss_id "TSS21027"; |          |   |   |   |                                                                    |
| chr14 | Cufflinks exon73061035                      | 73061071 | . | - | . | gene_id "XLOC_016686"; transcript_id "TCONS_00027869"; exon_number |
|       | "3"; oId "CUFF.28219.4"; tss_id "TSS21027"; |          |   |   |   |                                                                    |
| chr14 | Cufflinks exon73071202                      | 73071556 | . | - | . | gene_id "XLOC_016686"; transcript_id "TCONS_00027869"; exon_number |
|       | "4"; oId "CUFF.28219.4"; tss_id "TSS21027"; |          |   |   |   |                                                                    |
| chr14 | Cufflinks exon77497943                      | 77499558 | . | - | . | gene_id "XLOC_016759"; transcript_id "TCONS_00027989"; exon_number |

"1"; oId "CUFF.28512.1"; tss\_id "TSS21122";  
chr14 Cufflinks exon77500391 77500515 . - . gene\_id "XLOC\_016759"; transcript\_id "TCONS\_00027989"; exon\_number  
"2"; oId "CUFF.28512.1"; tss\_id "TSS21122";  
chr14 Cufflinks exon77497943 77499558 . - . gene\_id "XLOC\_016759"; transcript\_id "TCONS\_00027991"; exon\_number  
"1"; oId "CUFF.28512.3"; tss\_id "TSS21123";  
chr14 Cufflinks exon77499694 77500773 . - . gene\_id "XLOC\_016759"; transcript\_id "TCONS\_00027991"; exon\_number  
"2"; oId "CUFF.28512.3"; tss\_id "TSS21123";  
chr14 Cufflinks exon77497943 77499558 . - . gene\_id "XLOC\_016759"; transcript\_id "TCONS\_00027990"; exon\_number  
"1"; oId "CUFF.28512.2"; tss\_id "TSS21123";  
chr14 Cufflinks exon77500183 77500773 . - . gene\_id "XLOC\_016759"; transcript\_id "TCONS\_00027990"; exon\_number  
"2"; oId "CUFF.28512.2"; tss\_id "TSS21123";  
chr14 Cufflinks exon81570839 81572024 . - . gene\_id "XLOC\_016788"; transcript\_id "TCONS\_00028040"; exon\_number  
"1"; oId "CUFF.28679.1"; tss\_id "TSS21159";  
chr14 Cufflinks exon81573377 81573524 . - . gene\_id "XLOC\_016788"; transcript\_id "TCONS\_00028040"; exon\_number  
"2"; oId "CUFF.28679.1"; tss\_id "TSS21159";  
chr14 Cufflinks exon81631537 81631672 . - . gene\_id "XLOC\_016788"; transcript\_id "TCONS\_00028040"; exon\_number  
"3"; oId "CUFF.28679.1"; tss\_id "TSS21159";  
chr14 Cufflinks exon91286426 91286709 . - . gene\_id "XLOC\_016823"; transcript\_id "TCONS\_00028098"; exon\_number  
"1"; oId "CUFF.28818.2"; tss\_id "TSS21203";  
chr14 Cufflinks exon91288031 91288088 . - . gene\_id "XLOC\_016823"; transcript\_id "TCONS\_00028098"; exon\_number  
"2"; oId "CUFF.28818.2"; tss\_id "TSS21203";  
chr14 Cufflinks exon91289366 91289497 . - . gene\_id "XLOC\_016823"; transcript\_id "TCONS\_00028098"; exon\_number  
"3"; oId "CUFF.28818.2"; tss\_id "TSS21203";  
chr14 Cufflinks exon91290422 91290474 . - . gene\_id "XLOC\_016823"; transcript\_id "TCONS\_00028098"; exon\_number  
"4"; oId "CUFF.28818.2"; tss\_id "TSS21203";  
chr14 Cufflinks exon91286426 91286710 . - . gene\_id "XLOC\_016823"; transcript\_id "TCONS\_00028099"; exon\_number  
"1"; oId "CUFF.28818.3"; tss\_id "TSS21204";  
chr14 Cufflinks exon91288031 91288088 . - . gene\_id "XLOC\_016823"; transcript\_id "TCONS\_00028099"; exon\_number  
"2"; oId "CUFF.28818.3"; tss\_id "TSS21204";  
chr14 Cufflinks exon91289366 91289497 . - . gene\_id "XLOC\_016823"; transcript\_id "TCONS\_00028099"; exon\_number  
"3"; oId "CUFF.28818.3"; tss\_id "TSS21204";  
chr14 Cufflinks exon91294333 91294503 . - . gene\_id "XLOC\_016823"; transcript\_id "TCONS\_00028099"; exon\_number  
"4"; oId "CUFF.28818.3"; tss\_id "TSS21204";  
chr14 Cufflinks exon91286426 91286709 . - . gene\_id "XLOC\_016823"; transcript\_id "TCONS\_00028101"; exon\_number  
"1"; oId "CUFF.28818.4"; tss\_id "TSS21204";  
chr14 Cufflinks exon91288031 91288088 . - . gene\_id "XLOC\_016823"; transcript\_id "TCONS\_00028101"; exon\_number  
"2"; oId "CUFF.28818.4"; tss\_id "TSS21204";  
chr14 Cufflinks exon91289366 91289498 . - . gene\_id "XLOC\_016823"; transcript\_id "TCONS\_00028101"; exon\_number  
"3"; oId "CUFF.28818.4"; tss\_id "TSS21204";  
chr14 Cufflinks exon91294334 91294543 . - . gene\_id "XLOC\_016823"; transcript\_id "TCONS\_00028101"; exon\_number  
"4"; oId "CUFF.28818.4"; tss\_id "TSS21204";  
chr14 Cufflinks exon91286426 91286709 . - . gene\_id "XLOC\_016823"; transcript\_id "TCONS\_00028100"; exon\_number  
"1"; oId "CUFF.28818.1"; tss\_id "TSS21204";

|       |                |          |          |   |   |   |                                                                                                                |
|-------|----------------|----------|----------|---|---|---|----------------------------------------------------------------------------------------------------------------|
| chr14 | Cufflinks exon | 91288031 | 91288088 | . | - | . | gene_id "XLOC_016823"; transcript_id "TCONS_00028100"; exon_number "2"; oId "CUFF.28818.1"; tss_id "TSS21204"; |
| chr14 | Cufflinks exon | 91289366 | 91289497 | . | - | . | gene_id "XLOC_016823"; transcript_id "TCONS_00028100"; exon_number "3"; oId "CUFF.28818.1"; tss_id "TSS21204"; |
| chr14 | Cufflinks exon | 91294333 | 91294543 | . | - | . | gene_id "XLOC_016823"; transcript_id "TCONS_00028100"; exon_number "4"; oId "CUFF.28818.1"; tss_id "TSS21204"; |
| chr14 | Cufflinks exon | 91288718 | 91288820 | . | - | . | gene_id "XLOC_016823"; transcript_id "TCONS_00028102"; exon_number "1"; oId "CUFF.28818.5"; tss_id "TSS21204"; |
| chr14 | Cufflinks exon | 91289366 | 91289497 | . | - | . | gene_id "XLOC_016823"; transcript_id "TCONS_00028102"; exon_number "2"; oId "CUFF.28818.5"; tss_id "TSS21204"; |
| chr14 | Cufflinks exon | 91294333 | 91294518 | . | - | . | gene_id "XLOC_016823"; transcript_id "TCONS_00028102"; exon_number "3"; oId "CUFF.28818.5"; tss_id "TSS21204"; |
| chr14 | Cufflinks exon | 95999249 | 95999398 | . | - | . | gene_id "XLOC_016888"; transcript_id "TCONS_00028233"; exon_number "1"; oId "CUFF.29040.2"; tss_id "TSS21309"; |
| chr14 | Cufflinks exon | 96000030 | 96001209 | . | - | . | gene_id "XLOC_016888"; transcript_id "TCONS_00028233"; exon_number "2"; oId "CUFF.29040.2"; tss_id "TSS21309"; |
| chr14 | Cufflinks exon | 97683072 | 97684392 | . | - | . | gene_id "XLOC_016901"; transcript_id "TCONS_00028252"; exon_number "1"; oId "CUFF.29131.2"; tss_id "TSS21325"; |
| chr14 | Cufflinks exon | 97685474 | 97685625 | . | - | . | gene_id "XLOC_016901"; transcript_id "TCONS_00028252"; exon_number "2"; oId "CUFF.29131.2"; tss_id "TSS21325"; |
| chr14 | Cufflinks exon | 97683072 | 97684392 | . | - | . | gene_id "XLOC_016901"; transcript_id "TCONS_00028253"; exon_number "1"; oId "CUFF.29131.1"; tss_id "TSS21326"; |
| chr14 | Cufflinks exon | 97686716 | 97686816 | . | - | . | gene_id "XLOC_016901"; transcript_id "TCONS_00028253"; exon_number "2"; oId "CUFF.29131.1"; tss_id "TSS21326"; |
| chr14 | Cufflinks exon | 98098984 | 98100028 | . | - | . | gene_id "XLOC_016902"; transcript_id "TCONS_00028254"; exon_number "1"; oId "CUFF.29138.1"; tss_id "TSS21327"; |
| chr14 | Cufflinks exon | 98112499 | 98112709 | . | - | . | gene_id "XLOC_016902"; transcript_id "TCONS_00028254"; exon_number "2"; oId "CUFF.29138.1"; tss_id "TSS21327"; |
| chr14 | Cufflinks exon | 98139666 | 98139779 | . | - | . | gene_id "XLOC_016902"; transcript_id "TCONS_00028254"; exon_number "3"; oId "CUFF.29138.1"; tss_id "TSS21327"; |
| chr14 | Cufflinks exon | 98152696 | 98152995 | . | - | . | gene_id "XLOC_016902"; transcript_id "TCONS_00028254"; exon_number "4"; oId "CUFF.29138.1"; tss_id "TSS21327"; |
| chr14 | Cufflinks exon | 98110114 | 98112707 | . | - | . | gene_id "XLOC_016902"; transcript_id "TCONS_00028261"; exon_number "1"; oId "CUFF.29138.3"; tss_id "TSS21328"; |
| chr14 | Cufflinks exon | 98166022 | 98166478 | . | - | . | gene_id "XLOC_016902"; transcript_id "TCONS_00028261"; exon_number "2"; oId "CUFF.29138.3"; tss_id "TSS21328"; |
| chr14 | Cufflinks exon | 98184057 | 98184297 | . | - | . | gene_id "XLOC_016902"; transcript_id "TCONS_00028261"; exon_number "3"; oId "CUFF.29138.3"; tss_id "TSS21328"; |
| chr14 | Cufflinks exon | 98185052 | 98186008 | . | - | . | gene_id "XLOC_016902"; transcript_id "TCONS_00028261"; exon_number "4"; oId "CUFF.29138.3"; tss_id "TSS21328"; |
| chr14 | Cufflinks exon | 98110114 | 98112707 | . | - | . | gene_id "XLOC_016902"; transcript_id "TCONS_00028260"; exon_number "1"; oId "CUFF.29138.2"; tss_id "TSS21328"; |
| chr14 | Cufflinks exon | 98166022 | 98166478 | . | - | . | gene_id "XLOC_016902"; transcript_id "TCONS_00028260"; exon_number "2"; oId "CUFF.29138.2"; tss_id "TSS21328"; |

|                                             |   |   |   |                                                                    |  |
|---------------------------------------------|---|---|---|--------------------------------------------------------------------|--|
| "2"; oId "CUFF.29138.2"; tss_id "TSS21328"; |   |   |   |                                                                    |  |
| chr14 Cufflinks exon98184057 98185178       | . | - | . | gene_id "XLOC_016902"; transcript_id "TCONS_00028260"; exon_number |  |
| "3"; oId "CUFF.29138.2"; tss_id "TSS21328"; |   |   |   |                                                                    |  |
| chr14 Cufflinks exon98185344 98186008       | . | - | . | gene_id "XLOC_016902"; transcript_id "TCONS_00028260"; exon_number |  |
| "4"; oId "CUFF.29138.2"; tss_id "TSS21328"; |   |   |   |                                                                    |  |
| chr14 Cufflinks exon98214752 98218312       | . | - | . | gene_id "XLOC_016915"; transcript_id "TCONS_00028269"; exon_number |  |
| "1"; oId "CUFF.29166.1"; tss_id "TSS21341"; |   |   |   |                                                                    |  |
| chr14 Cufflinks exon98228835 98229482       | . | - | . | gene_id "XLOC_016915"; transcript_id "TCONS_00028269"; exon_number |  |
| "2"; oId "CUFF.29166.1"; tss_id "TSS21341"; |   |   |   |                                                                    |  |
| chr14 Cufflinks exon98391947 98392981       | . | - | . | gene_id "XLOC_016926"; transcript_id "TCONS_00028280"; exon_number |  |
| "1"; oId "CUFF.29186.2"; tss_id "TSS21352"; |   |   |   |                                                                    |  |
| chr14 Cufflinks exon98435610 98435884       | . | - | . | gene_id "XLOC_016926"; transcript_id "TCONS_00028280"; exon_number |  |
| "2"; oId "CUFF.29186.2"; tss_id "TSS21352"; |   |   |   |                                                                    |  |
| chr14 Cufflinks exon98444314 98444550       | . | - | . | gene_id "XLOC_016926"; transcript_id "TCONS_00028280"; exon_number |  |
| "3"; oId "CUFF.29186.2"; tss_id "TSS21352"; |   |   |   |                                                                    |  |
| chr14 Cufflinks exon98391947 98392981       | . | - | . | gene_id "XLOC_016926"; transcript_id "TCONS_00028281"; exon_number |  |
| "1"; oId "CUFF.29186.1"; tss_id "TSS21352"; |   |   |   |                                                                    |  |
| chr14 Cufflinks exon98426600 98426754       | . | - | . | gene_id "XLOC_016926"; transcript_id "TCONS_00028281"; exon_number |  |
| "2"; oId "CUFF.29186.1"; tss_id "TSS21352"; |   |   |   |                                                                    |  |
| chr14 Cufflinks exon98435610 98435884       | . | - | . | gene_id "XLOC_016926"; transcript_id "TCONS_00028281"; exon_number |  |
| "3"; oId "CUFF.29186.1"; tss_id "TSS21352"; |   |   |   |                                                                    |  |
| chr14 Cufflinks exon98444314 98444589       | . | - | . | gene_id "XLOC_016926"; transcript_id "TCONS_00028281"; exon_number |  |
| "4"; oId "CUFF.29186.1"; tss_id "TSS21352"; |   |   |   |                                                                    |  |
| chr14 Cufflinks exon98420014 98423978       | . | - | . | gene_id "XLOC_016926"; transcript_id "TCONS_00028288"; exon_number |  |
| "1"; oId "CUFF.29186.6"; tss_id "TSS21352"; |   |   |   |                                                                    |  |
| chr14 Cufflinks exon98425895 98426158       | . | - | . | gene_id "XLOC_016926"; transcript_id "TCONS_00028288"; exon_number |  |
| "2"; oId "CUFF.29186.6"; tss_id "TSS21352"; |   |   |   |                                                                    |  |
| chr14 Cufflinks exon98426601 98426754       | . | - | . | gene_id "XLOC_016926"; transcript_id "TCONS_00028288"; exon_number |  |
| "3"; oId "CUFF.29186.6"; tss_id "TSS21352"; |   |   |   |                                                                    |  |
| chr14 Cufflinks exon98435610 98435884       | . | - | . | gene_id "XLOC_016926"; transcript_id "TCONS_00028288"; exon_number |  |
| "4"; oId "CUFF.29186.6"; tss_id "TSS21352"; |   |   |   |                                                                    |  |
| chr14 Cufflinks exon98444314 98444589       | . | - | . | gene_id "XLOC_016926"; transcript_id "TCONS_00028288"; exon_number |  |
| "5"; oId "CUFF.29186.6"; tss_id "TSS21352"; |   |   |   |                                                                    |  |
| chr14 Cufflinks exon98420014 98426157       | . | - | . | gene_id "XLOC_016926"; transcript_id "TCONS_00028289"; exon_number |  |
| "1"; oId "CUFF.29186.5"; tss_id "TSS21352"; |   |   |   |                                                                    |  |
| chr14 Cufflinks exon98426600 98426754       | . | - | . | gene_id "XLOC_016926"; transcript_id "TCONS_00028289"; exon_number |  |
| "2"; oId "CUFF.29186.5"; tss_id "TSS21352"; |   |   |   |                                                                    |  |
| chr14 Cufflinks exon98435610 98435884       | . | - | . | gene_id "XLOC_016926"; transcript_id "TCONS_00028289"; exon_number |  |
| "3"; oId "CUFF.29186.5"; tss_id "TSS21352"; |   |   |   |                                                                    |  |
| chr14 Cufflinks exon98442650 98442782       | . | - | . | gene_id "XLOC_016926"; transcript_id "TCONS_00028289"; exon_number |  |
| "4"; oId "CUFF.29186.5"; tss_id "TSS21352"; |   |   |   |                                                                    |  |
| chr14 Cufflinks exon98444314 98444645       | . | - | . | gene_id "XLOC_016926"; transcript_id "TCONS_00028289"; exon_number |  |
| "5"; oId "CUFF.29186.5"; tss_id "TSS21352"; |   |   |   |                                                                    |  |

|       |                |          |          |   |   |   |                                                                                                                |
|-------|----------------|----------|----------|---|---|---|----------------------------------------------------------------------------------------------------------------|
| chr14 | Cufflinks exon | 98420014 | 98426157 | . | - | . | gene_id "XLOC_016926"; transcript_id "TCONS_00028291"; exon_number "1"; oId "CUFF.29186.4"; tss_id "TSS21353"; |
| chr14 | Cufflinks exon | 98426600 | 98426754 | . | - | . | gene_id "XLOC_016926"; transcript_id "TCONS_00028291"; exon_number "2"; oId "CUFF.29186.4"; tss_id "TSS21353"; |
| chr14 | Cufflinks exon | 98435610 | 98435725 | . | - | . | gene_id "XLOC_016926"; transcript_id "TCONS_00028291"; exon_number "3"; oId "CUFF.29186.4"; tss_id "TSS21353"; |
| chr14 | Cufflinks exon | 98435808 | 98435884 | . | - | . | gene_id "XLOC_016926"; transcript_id "TCONS_00028291"; exon_number "4"; oId "CUFF.29186.4"; tss_id "TSS21353"; |
| chr14 | Cufflinks exon | 98444314 | 98444963 | . | - | . | gene_id "XLOC_016926"; transcript_id "TCONS_00028291"; exon_number "5"; oId "CUFF.29186.4"; tss_id "TSS21353"; |
| chr14 | Cufflinks exon | 98420014 | 98426754 | . | - | . | gene_id "XLOC_016926"; transcript_id "TCONS_00028290"; exon_number "1"; oId "CUFF.29186.3"; tss_id "TSS21353"; |
| chr14 | Cufflinks exon | 98435610 | 98435725 | . | - | . | gene_id "XLOC_016926"; transcript_id "TCONS_00028290"; exon_number "2"; oId "CUFF.29186.3"; tss_id "TSS21353"; |
| chr14 | Cufflinks exon | 98444314 | 98444963 | . | - | . | gene_id "XLOC_016926"; transcript_id "TCONS_00028290"; exon_number "3"; oId "CUFF.29186.3"; tss_id "TSS21353"; |
| chr14 | Cufflinks exon | 98442171 | 98442314 | . | - | . | gene_id "XLOC_016926"; transcript_id "TCONS_00028294"; exon_number "1"; oId "CUFF.29186.7"; tss_id "TSS21354"; |
| chr14 | Cufflinks exon | 98442650 | 98442767 | . | - | . | gene_id "XLOC_016926"; transcript_id "TCONS_00028294"; exon_number "2"; oId "CUFF.29186.7"; tss_id "TSS21354"; |
| chr14 | Cufflinks exon | 98499644 | 98501751 | . | - | . | gene_id "XLOC_016938"; transcript_id "TCONS_00028298"; exon_number "1"; oId "CUFF.29201.1"; tss_id "TSS21366"; |
| chr14 | Cufflinks exon | 98501979 | 98504361 | . | - | . | gene_id "XLOC_016938"; transcript_id "TCONS_00028298"; exon_number "2"; oId "CUFF.29201.1"; tss_id "TSS21366"; |
| chr14 | Cufflinks exon | 98514984 | 98515067 | . | - | . | gene_id "XLOC_016938"; transcript_id "TCONS_00028298"; exon_number "3"; oId "CUFF.29201.1"; tss_id "TSS21366"; |
| chr14 | Cufflinks exon | 98516004 | 98516106 | . | - | . | gene_id "XLOC_016938"; transcript_id "TCONS_00028298"; exon_number "4"; oId "CUFF.29201.1"; tss_id "TSS21366"; |
| chr14 | Cufflinks exon | 98632407 | 98632605 | . | - | . | gene_id "XLOC_016938"; transcript_id "TCONS_00028298"; exon_number "5"; oId "CUFF.29201.1"; tss_id "TSS21366"; |
| chr14 | Cufflinks exon | 98499644 | 98501751 | . | - | . | gene_id "XLOC_016938"; transcript_id "TCONS_00028300"; exon_number "1"; oId "CUFF.29201.4"; tss_id "TSS21367"; |
| chr14 | Cufflinks exon | 98501979 | 98504361 | . | - | . | gene_id "XLOC_016938"; transcript_id "TCONS_00028300"; exon_number "2"; oId "CUFF.29201.4"; tss_id "TSS21367"; |
| chr14 | Cufflinks exon | 98514984 | 98515067 | . | - | . | gene_id "XLOC_016938"; transcript_id "TCONS_00028300"; exon_number "3"; oId "CUFF.29201.4"; tss_id "TSS21367"; |
| chr14 | Cufflinks exon | 98516004 | 98516106 | . | - | . | gene_id "XLOC_016938"; transcript_id "TCONS_00028300"; exon_number "4"; oId "CUFF.29201.4"; tss_id "TSS21367"; |
| chr14 | Cufflinks exon | 98518789 | 98520394 | . | - | . | gene_id "XLOC_016938"; transcript_id "TCONS_00028300"; exon_number "5"; oId "CUFF.29201.4"; tss_id "TSS21367"; |
| chr14 | Cufflinks exon | 98523660 | 98545388 | . | - | . | gene_id "XLOC_016938"; transcript_id "TCONS_00028300"; exon_number "6"; oId "CUFF.29201.4"; tss_id "TSS21367"; |
| chr14 | Cufflinks exon | 98546714 | 98546862 | . | - | . | gene_id "XLOC_016938"; transcript_id "TCONS_00028300"; exon_number                                             |

"7"; oId "CUFF.29201.4"; tss\_id "TSS21367";  
chr14 Cufflinks exon98632407 98632889 . - . gene\_id "XLOC\_016938"; transcript\_id "TCONS\_00028300"; exon\_number  
"8"; oId "CUFF.29201.4"; tss\_id "TSS21367";  
chr14 Cufflinks exon98499644 98501751 . - . gene\_id "XLOC\_016938"; transcript\_id "TCONS\_00028299"; exon\_number  
"1"; oId "CUFF.29201.3"; tss\_id "TSS21367";  
chr14 Cufflinks exon98514984 98515067 . - . gene\_id "XLOC\_016938"; transcript\_id "TCONS\_00028299"; exon\_number  
"2"; oId "CUFF.29201.3"; tss\_id "TSS21367";  
chr14 Cufflinks exon98516004 98516106 . - . gene\_id "XLOC\_016938"; transcript\_id "TCONS\_00028299"; exon\_number  
"3"; oId "CUFF.29201.3"; tss\_id "TSS21367";  
chr14 Cufflinks exon98522727 98545388 . - . gene\_id "XLOC\_016938"; transcript\_id "TCONS\_00028299"; exon\_number  
"4"; oId "CUFF.29201.3"; tss\_id "TSS21367";  
chr14 Cufflinks exon98546714 98546862 . - . gene\_id "XLOC\_016938"; transcript\_id "TCONS\_00028299"; exon\_number  
"5"; oId "CUFF.29201.3"; tss\_id "TSS21367";  
chr14 Cufflinks exon98632407 98632889 . - . gene\_id "XLOC\_016938"; transcript\_id "TCONS\_00028299"; exon\_number  
"6"; oId "CUFF.29201.3"; tss\_id "TSS21367";  
chr14 Cufflinks exon98499644 98501751 . - . gene\_id "XLOC\_016938"; transcript\_id "TCONS\_00028301"; exon\_number  
"1"; oId "CUFF.29201.2"; tss\_id "TSS21368";  
chr14 Cufflinks exon98501979 98502101 . - . gene\_id "XLOC\_016938"; transcript\_id "TCONS\_00028301"; exon\_number  
"2"; oId "CUFF.29201.2"; tss\_id "TSS21368";  
chr14 Cufflinks exon98504097 98504381 . - . gene\_id "XLOC\_016938"; transcript\_id "TCONS\_00028301"; exon\_number  
"3"; oId "CUFF.29201.2"; tss\_id "TSS21368";  
chr14 Cufflinks exon98514984 98515067 . - . gene\_id "XLOC\_016938"; transcript\_id "TCONS\_00028301"; exon\_number  
"4"; oId "CUFF.29201.2"; tss\_id "TSS21368";  
chr14 Cufflinks exon98516004 98516106 . - . gene\_id "XLOC\_016938"; transcript\_id "TCONS\_00028301"; exon\_number  
"5"; oId "CUFF.29201.2"; tss\_id "TSS21368";  
chr14 Cufflinks exon98523005 98523046 . - . gene\_id "XLOC\_016938"; transcript\_id "TCONS\_00028301"; exon\_number  
"6"; oId "CUFF.29201.2"; tss\_id "TSS21368";  
chr14 Cufflinks exon98523660 98540522 . - . gene\_id "XLOC\_016938"; transcript\_id "TCONS\_00028301"; exon\_number  
"7"; oId "CUFF.29201.2"; tss\_id "TSS21368";  
chr14 Cufflinks exon98540567 98545388 . - . gene\_id "XLOC\_016938"; transcript\_id "TCONS\_00028301"; exon\_number  
"8"; oId "CUFF.29201.2"; tss\_id "TSS21368";  
chr14 Cufflinks exon98546714 98546862 . - . gene\_id "XLOC\_016938"; transcript\_id "TCONS\_00028301"; exon\_number  
"9"; oId "CUFF.29201.2"; tss\_id "TSS21368";  
chr14 Cufflinks exon98632407 98632484 . - . gene\_id "XLOC\_016938"; transcript\_id "TCONS\_00028301"; exon\_number  
"10"; oId "CUFF.29201.2"; tss\_id "TSS21368";  
chr14 Cufflinks exon98639533 98639901 . - . gene\_id "XLOC\_016938"; transcript\_id "TCONS\_00028301"; exon\_number  
"11"; oId "CUFF.29201.2"; tss\_id "TSS21368";  
chr14 Cufflinks exon98514757 98515067 . - . gene\_id "XLOC\_016938"; transcript\_id "TCONS\_00028307"; exon\_number  
"1"; oId "CUFF.29201.5"; tss\_id "TSS21369";  
chr14 Cufflinks exon98516004 98516106 . - . gene\_id "XLOC\_016938"; transcript\_id "TCONS\_00028307"; exon\_number  
"2"; oId "CUFF.29201.5"; tss\_id "TSS21369";  
chr14 Cufflinks exon98518789 98545388 . - . gene\_id "XLOC\_016938"; transcript\_id "TCONS\_00028307"; exon\_number  
"3"; oId "CUFF.29201.5"; tss\_id "TSS21369";

|       |                |          |          |   |   |   |                                                                                                                 |
|-------|----------------|----------|----------|---|---|---|-----------------------------------------------------------------------------------------------------------------|
| chr14 | Cufflinks exon | 98546714 | 98546862 | . | - | . | gene_id "XLOC_016938"; transcript_id "TCONS_00028307"; exon_number "4"; oId "CUFF.29201.5"; tss_id "TSS21369";  |
| chr14 | Cufflinks exon | 98632407 | 98636411 | . | - | . | gene_id "XLOC_016938"; transcript_id "TCONS_00028307"; exon_number "5"; oId "CUFF.29201.5"; tss_id "TSS21369";  |
| chr14 | Cufflinks exon | 98533316 | 98534848 | . | - | . | gene_id "XLOC_016938"; transcript_id "TCONS_00028308"; exon_number "1"; oId "CUFF.29201.7"; tss_id "TSS21370";  |
| chr14 | Cufflinks exon | 98543748 | 98543770 | . | - | . | gene_id "XLOC_016938"; transcript_id "TCONS_00028308"; exon_number "2"; oId "CUFF.29201.7"; tss_id "TSS21370";  |
| chr14 | Cufflinks exon | 98535772 | 98545388 | . | - | . | gene_id "XLOC_016938"; transcript_id "TCONS_00028309"; exon_number "1"; oId "CUFF.29201.9"; tss_id "TSS21371";  |
| chr14 | Cufflinks exon | 98546714 | 98546862 | . | - | . | gene_id "XLOC_016938"; transcript_id "TCONS_00028309"; exon_number "2"; oId "CUFF.29201.9"; tss_id "TSS21371";  |
| chr14 | Cufflinks exon | 98620833 | 98620914 | . | - | . | gene_id "XLOC_016938"; transcript_id "TCONS_00028309"; exon_number "3"; oId "CUFF.29201.9"; tss_id "TSS21371";  |
| chr14 | Cufflinks exon | 98535772 | 98538551 | . | - | . | gene_id "XLOC_016938"; transcript_id "TCONS_00028310"; exon_number "1"; oId "CUFF.29201.8"; tss_id "TSS21366";  |
| chr14 | Cufflinks exon | 98543748 | 98545388 | . | - | . | gene_id "XLOC_016938"; transcript_id "TCONS_00028310"; exon_number "2"; oId "CUFF.29201.8"; tss_id "TSS21366";  |
| chr14 | Cufflinks exon | 98546714 | 98546862 | . | - | . | gene_id "XLOC_016938"; transcript_id "TCONS_00028310"; exon_number "3"; oId "CUFF.29201.8"; tss_id "TSS21366";  |
| chr14 | Cufflinks exon | 98632407 | 98632605 | . | - | . | gene_id "XLOC_016938"; transcript_id "TCONS_00028310"; exon_number "4"; oId "CUFF.29201.8"; tss_id "TSS21366";  |
| chr14 | Cufflinks exon | 98628814 | 98629445 | . | - | . | gene_id "XLOC_016938"; transcript_id "TCONS_00028332"; exon_number "1"; oId "CUFF.29201.10"; tss_id "TSS21373"; |
| chr14 | Cufflinks exon | 98639533 | 98639587 | . | - | . | gene_id "XLOC_016938"; transcript_id "TCONS_00028332"; exon_number "2"; oId "CUFF.29201.10"; tss_id "TSS21373"; |
| chr14 | Cufflinks exon | 98668335 | 98669504 | . | - | . | gene_id "XLOC_016972"; transcript_id "TCONS_00028342"; exon_number "1"; oId "CUFF.29262.2"; tss_id "TSS21408";  |
| chr14 | Cufflinks exon | 98669766 | 98670444 | . | - | . | gene_id "XLOC_016972"; transcript_id "TCONS_00028342"; exon_number "2"; oId "CUFF.29262.2"; tss_id "TSS21408";  |
| chr14 | Cufflinks exon | 98671360 | 98671488 | . | - | . | gene_id "XLOC_016972"; transcript_id "TCONS_00028342"; exon_number "3"; oId "CUFF.29262.2"; tss_id "TSS21408";  |
| chr14 | Cufflinks exon | 98671993 | 98672061 | . | - | . | gene_id "XLOC_016972"; transcript_id "TCONS_00028342"; exon_number "4"; oId "CUFF.29262.2"; tss_id "TSS21408";  |
| chr14 | Cufflinks exon | 98668335 | 98669504 | . | - | . | gene_id "XLOC_016972"; transcript_id "TCONS_00028343"; exon_number "1"; oId "CUFF.29262.1"; tss_id "TSS21409";  |
| chr14 | Cufflinks exon | 98669766 | 98670610 | . | - | . | gene_id "XLOC_016972"; transcript_id "TCONS_00028343"; exon_number "2"; oId "CUFF.29262.1"; tss_id "TSS21409";  |
| chr14 | Cufflinks exon | 98671360 | 98671429 | . | - | . | gene_id "XLOC_016972"; transcript_id "TCONS_00028343"; exon_number "3"; oId "CUFF.29262.1"; tss_id "TSS21409";  |
| chr14 | Cufflinks exon | 98680350 | 98680393 | . | - | . | gene_id "XLOC_016972"; transcript_id "TCONS_00028343"; exon_number "4"; oId "CUFF.29262.1"; tss_id "TSS21409";  |
| chr14 | Cufflinks exon | 99112546 | 99112564 | . | - | . | gene_id "XLOC_016980"; transcript_id "TCONS_00028351"; exon_number                                              |

"1"; oId "CUFF.29287.3"; tss\_id "TSS21417";  
chr14 Cufflinks exon99170273 99170433 . - . gene\_id "XLOC\_016980"; transcript\_id "TCONS\_00028351"; exon\_number  
"2"; oId "CUFF.29287.3"; tss\_id "TSS21417";  
chr14 Cufflinks exon99170863 99170991 . - . gene\_id "XLOC\_016980"; transcript\_id "TCONS\_00028351"; exon\_number  
"3"; oId "CUFF.29287.3"; tss\_id "TSS21417";  
chr14 Cufflinks exon99164418 99164724 . - . gene\_id "XLOC\_016980"; transcript\_id "TCONS\_00028352"; exon\_number  
"1"; oId "CUFF.29287.6"; tss\_id "TSS21418";  
chr14 Cufflinks exon 99164968 99165010 . - . gene\_id "XLOC\_016980"; transcript\_id "TCONS\_00028352";  
exon\_number "2"; oId "CUFF.29287.6"; tss\_id "TSS21418";  
chr14 Cufflinks exon 99164418 99165135 . - . gene\_id "XLOC\_016980"; transcript\_id "TCONS\_00028353";  
exon\_number "1"; oId "CUFF.29287.7"; tss\_id "TSS21419";  
chr14 Cufflinks exon 99165288 99165476 . - . gene\_id "XLOC\_016980"; transcript\_id "TCONS\_00028353";  
exon\_number "2"; oId "CUFF.29287.7"; tss\_id "TSS21419";  
chr14 Cufflinks exon 99170273 99170433 . - . gene\_id "XLOC\_016980"; transcript\_id "TCONS\_00028353";  
exon\_number "3"; oId "CUFF.29287.7"; tss\_id "TSS21419";  
chr14 Cufflinks exon 99170529 99170753 . - . gene\_id "XLOC\_016980"; transcript\_id "TCONS\_00028353";  
exon\_number "4"; oId "CUFF.29287.7"; tss\_id "TSS21419";  
chr14 Cufflinks exon 99425724 99426463 . - . gene\_id "XLOC\_016998"; transcript\_id "TCONS\_00028371";  
exon\_number "1"; oId "CUFF.29314.1"; tss\_id "TSS21437";  
chr14 Cufflinks exon99428591 99429322 . - . gene\_id "XLOC\_016998"; transcript\_id "TCONS\_00028371"; exon\_number  
"2"; oId "CUFF.29314.1"; tss\_id "TSS21437";  
chr14 Cufflinks exon99425724 99426462 . - . gene\_id "XLOC\_016998"; transcript\_id "TCONS\_00028372"; exon\_number  
"1"; oId "CUFF.29314.2"; tss\_id "TSS21438";  
chr14 Cufflinks exon99428591 99428663 . - . gene\_id "XLOC\_016998"; transcript\_id "TCONS\_00028372"; exon\_number  
"2"; oId "CUFF.29314.2"; tss\_id "TSS21438";  
chr14 Cufflinks exon99431100 99431228 . - . gene\_id "XLOC\_016998"; transcript\_id "TCONS\_00028372"; exon\_number  
"3"; oId "CUFF.29314.2"; tss\_id "TSS21438";  
chr14 Cufflinks exon99431508 99431550 . - . gene\_id "XLOC\_016998"; transcript\_id "TCONS\_00028372"; exon\_number  
"4"; oId "CUFF.29314.2"; tss\_id "TSS21438";  
chr14 Cufflinks exon99428198 99428663 . - . gene\_id "XLOC\_016998"; transcript\_id "TCONS\_00028373"; exon\_number  
"1"; oId "CUFF.29314.3"; tss\_id "TSS21438";  
chr14 Cufflinks exon99431100 99431225 . - . gene\_id "XLOC\_016998"; transcript\_id "TCONS\_00028373"; exon\_number  
"2"; oId "CUFF.29314.3"; tss\_id "TSS21438";  
chr14 Cufflinks exon99431508 99431564 . - . gene\_id "XLOC\_016998"; transcript\_id "TCONS\_00028373"; exon\_number  
"3"; oId "CUFF.29314.3"; tss\_id "TSS21438";  
chr14 Cufflinks exon99751055 99751861 . - . gene\_id "XLOC\_017020"; transcript\_id "TCONS\_00028408"; exon\_number  
"1"; oId "CUFF.29354.1"; tss\_id "TSS21467";  
chr14 Cufflinks exon99753611 99753851 . - . gene\_id "XLOC\_017020"; transcript\_id "TCONS\_00028408"; exon\_number  
"2"; oId "CUFF.29354.1"; tss\_id "TSS21467";  
chr14 Cufflinks exon100633278 100633299 . - . gene\_id "XLOC\_017035"; transcript\_id "TCONS\_00028437"; exon\_number  
"1"; oId "CUFF.29461.8"; tss\_id "TSS21490";  
chr14 Cufflinks exon100635030 100635100 . - . gene\_id "XLOC\_017035"; transcript\_id "TCONS\_00028437"; exon\_number  
"2"; oId "CUFF.29461.8"; tss\_id "TSS21490";



|       |                |           |           |   |   |   |                                                                                                                 |
|-------|----------------|-----------|-----------|---|---|---|-----------------------------------------------------------------------------------------------------------------|
| chr14 | Cufflinks exon | 100658568 | 100659226 | . | - | . | gene_id "XLOC_017035"; transcript_id "TCONS_00028437"; exon_number "3"; oId "CUFF.29461.8"; tss_id "TSS21490";  |
| chr14 | Cufflinks exon | 100640887 | 100643071 | . | - | . | gene_id "XLOC_017035"; transcript_id "TCONS_00028438"; exon_number "1"; oId "CUFF.29461.10"; tss_id "TSS21491"; |
| chr14 | Cufflinks exon | 100643257 | 100643429 | . | - | . | gene_id "XLOC_017035"; transcript_id "TCONS_00028438"; exon_number "2"; oId "CUFF.29461.10"; tss_id "TSS21491"; |
| chr14 | Cufflinks exon | 100658569 | 100659565 | . | - | . | gene_id "XLOC_017035"; transcript_id "TCONS_00028438"; exon_number "3"; oId "CUFF.29461.10"; tss_id "TSS21491"; |
| chr14 | Cufflinks exon | 100626066 | 100628311 | . | - | . | gene_id "XLOC_017038"; transcript_id "TCONS_00028435"; exon_number "1"; oId "CUFF.29464.1"; tss_id "TSS21494";  |
| chr14 | Cufflinks exon | 100628606 | 100628842 | . | - | . | gene_id "XLOC_017038"; transcript_id "TCONS_00028435"; exon_number "2"; oId "CUFF.29464.1"; tss_id "TSS21494";  |
| chr14 | Cufflinks exon | 100679248 | 100680030 | . | - | . | gene_id "XLOC_017041"; transcript_id "TCONS_00028440"; exon_number "1"; oId "CUFF.29486.1"; tss_id "TSS21497";  |
| chr14 | Cufflinks exon | 100680179 | 100681327 | . | - | . | gene_id "XLOC_017041"; transcript_id "TCONS_00028440"; exon_number "2"; oId "CUFF.29486.1"; tss_id "TSS21497";  |
| chr14 | Cufflinks exon | 101586948 | 101587101 | . | - | . | gene_id "XLOC_017063"; transcript_id "TCONS_00028474"; exon_number "1"; oId "CUFF.29538.2"; tss_id "TSS21524";  |
| chr14 | Cufflinks exon | 101587365 | 101587873 | . | - | . | gene_id "XLOC_017063"; transcript_id "TCONS_00028474"; exon_number "2"; oId "CUFF.29538.2"; tss_id "TSS21524";  |
| chr14 | Cufflinks exon | 104348695 | 104350227 | . | - | . | gene_id "XLOC_017099"; transcript_id "TCONS_00028543"; exon_number "1"; oId "CUFF.29697.1"; tss_id "TSS21578";  |
| chr14 | Cufflinks exon | 104354660 | 104354736 | . | - | . | gene_id "XLOC_017099"; transcript_id "TCONS_00028543"; exon_number "2"; oId "CUFF.29697.1"; tss_id "TSS21578";  |
| chr14 | Cufflinks exon | 104375874 | 104377204 | . | - | . | gene_id "XLOC_017099"; transcript_id "TCONS_00028543"; exon_number "3"; oId "CUFF.29697.1"; tss_id "TSS21578";  |
| chr14 | Cufflinks exon | 104352902 | 104354736 | . | - | . | gene_id "XLOC_017099"; transcript_id "TCONS_00028545"; exon_number "1"; oId "CUFF.29697.3"; tss_id "TSS21578";  |
| chr14 | Cufflinks exon | 104375874 | 104377204 | . | - | . | gene_id "XLOC_017099"; transcript_id "TCONS_00028545"; exon_number "2"; oId "CUFF.29697.3"; tss_id "TSS21578";  |
| chr14 | Cufflinks exon | 104364289 | 104364634 | . | - | . | gene_id "XLOC_017099"; transcript_id "TCONS_00028546"; exon_number "1"; oId "CUFF.29697.4"; tss_id "TSS21579";  |
| chr14 | Cufflinks exon | 104375874 | 104376772 | . | - | . | gene_id "XLOC_017099"; transcript_id "TCONS_00028546"; exon_number "2"; oId "CUFF.29697.4"; tss_id "TSS21579";  |
| chr14 | Cufflinks exon | 104366732 | 104366753 | . | - | . | gene_id "XLOC_017099"; transcript_id "TCONS_00028547"; exon_number "1"; oId "CUFF.29697.5"; tss_id "TSS21579";  |
| chr14 | Cufflinks exon | 104375874 | 104376772 | . | - | . | gene_id "XLOC_017099"; transcript_id "TCONS_00028547"; exon_number "2"; oId "CUFF.29697.5"; tss_id "TSS21579";  |
| chr14 | Cufflinks exon | 105275687 | 105275896 | . | - | . | gene_id "XLOC_017111"; transcript_id "TCONS_00028561"; exon_number "1"; oId "CUFF.29746.1"; tss_id "TSS21593";  |
| chr14 | Cufflinks exon | 105282071 | 105282383 | . | - | . | gene_id "XLOC_017111"; transcript_id "TCONS_00028561"; exon_number "2"; oId "CUFF.29746.1"; tss_id "TSS21593";  |
| chr14 | Cufflinks exon | 105457278 | 105464577 | . | - | . | gene_id "XLOC_017116"; transcript_id "TCONS_00028568"; exon_number                                              |

|                                             |   |   |   |                                                                    |  |
|---------------------------------------------|---|---|---|--------------------------------------------------------------------|--|
| "1"; oId "CUFF.29769.2"; tss_id "TSS21599"; |   |   |   |                                                                    |  |
| chr14 Cufflinks exon105472828 105474248     | . | - | . | gene_id "XLOC_017116"; transcript_id "TCONS_00028568"; exon_number |  |
| "2"; oId "CUFF.29769.2"; tss_id "TSS21599"; |   |   |   |                                                                    |  |
| chr14 Cufflinks exon105881931 105884646     | . | - | . | gene_id "XLOC_017127"; transcript_id "TCONS_00028589"; exon_number |  |
| "1"; oId "CUFF.29809.1"; tss_id "TSS21615"; |   |   |   |                                                                    |  |
| chr14 Cufflinks exon105885019 105885153     | . | - | . | gene_id "XLOC_017127"; transcript_id "TCONS_00028589"; exon_number |  |
| "2"; oId "CUFF.29809.1"; tss_id "TSS21615"; |   |   |   |                                                                    |  |
| chr14 Cufflinks exon105885359 105886136     | . | - | . | gene_id "XLOC_017127"; transcript_id "TCONS_00028589"; exon_number |  |
| "3"; oId "CUFF.29809.1"; tss_id "TSS21615"; |   |   |   |                                                                    |  |
| chr15 Cufflinks exon21987776 21988324       | . | + | . | gene_id "XLOC_017239"; transcript_id "TCONS_00028742"; exon_number |  |
| "1"; oId "CUFF.30123.1"; tss_id "TSS21750"; |   |   |   |                                                                    |  |
| chr15 Cufflinks exon21990211 21990259       | . | + | . | gene_id "XLOC_017239"; transcript_id "TCONS_00028742"; exon_number |  |
| "2"; oId "CUFF.30123.1"; tss_id "TSS21750"; |   |   |   |                                                                    |  |
| chr15 Cufflinks exon22010129 22010420       | . | + | . | gene_id "XLOC_017239"; transcript_id "TCONS_00028742"; exon_number |  |
| "3"; oId "CUFF.30123.1"; tss_id "TSS21750"; |   |   |   |                                                                    |  |
| chr15 Cufflinks exon22009075 22009329       | . | + | . | gene_id "XLOC_017239"; transcript_id "TCONS_00028750"; exon_number |  |
| "1"; oId "CUFF.30123.3"; tss_id "TSS21751"; |   |   |   |                                                                    |  |
| chr15 Cufflinks exon22010109 22010420       | . | + | . | gene_id "XLOC_017239"; transcript_id "TCONS_00028750"; exon_number |  |
| "2"; oId "CUFF.30123.3"; tss_id "TSS21751"; |   |   |   |                                                                    |  |
| chr15 Cufflinks exon23749137 23749358       | . | + | . | gene_id "XLOC_017273"; transcript_id "TCONS_00028796"; exon_number |  |
| "1"; oId "CUFF.30204.5"; tss_id "TSS21793"; |   |   |   |                                                                    |  |
| chr15 Cufflinks exon23804313 23804366       | . | + | . | gene_id "XLOC_017273"; transcript_id "TCONS_00028796"; exon_number |  |
| "2"; oId "CUFF.30204.5"; tss_id "TSS21793"; |   |   |   |                                                                    |  |
| chr15 Cufflinks exon23806607 23806729       | . | + | . | gene_id "XLOC_017273"; transcript_id "TCONS_00028796"; exon_number |  |
| "3"; oId "CUFF.30204.5"; tss_id "TSS21793"; |   |   |   |                                                                    |  |
| chr15 Cufflinks exon23807506 23808837       | . | + | . | gene_id "XLOC_017273"; transcript_id "TCONS_00028796"; exon_number |  |
| "4"; oId "CUFF.30204.5"; tss_id "TSS21793"; |   |   |   |                                                                    |  |
| chr15 Cufflinks exon25224244 25224789       | . | + | . | gene_id "XLOC_017281"; transcript_id "TCONS_00028804"; exon_number |  |
| "1"; oId "CUFF.30244.2"; tss_id "TSS21801"; |   |   |   |                                                                    |  |
| chr15 Cufflinks exon25225094 25225231       | . | + | . | gene_id "XLOC_017281"; transcript_id "TCONS_00028804"; exon_number |  |
| "2"; oId "CUFF.30244.2"; tss_id "TSS21801"; |   |   |   |                                                                    |  |
| chr15 Cufflinks exon25226922 25243633       | . | + | . | gene_id "XLOC_017281"; transcript_id "TCONS_00028804"; exon_number |  |
| "3"; oId "CUFF.30244.2"; tss_id "TSS21801"; |   |   |   |                                                                    |  |
| chr15 Cufflinks exon25244117 25244225       | . | + | . | gene_id "XLOC_017281"; transcript_id "TCONS_00028804"; exon_number |  |
| "4"; oId "CUFF.30244.2"; tss_id "TSS21801"; |   |   |   |                                                                    |  |
| chr15 Cufflinks exon25245392 25245521       | . | + | . | gene_id "XLOC_017281"; transcript_id "TCONS_00028804"; exon_number |  |
| "5"; oId "CUFF.30244.2"; tss_id "TSS21801"; |   |   |   |                                                                    |  |
| chr15 Cufflinks exon25247872 25248035       | . | + | . | gene_id "XLOC_017281"; transcript_id "TCONS_00028804"; exon_number |  |
| "6"; oId "CUFF.30244.2"; tss_id "TSS21801"; |   |   |   |                                                                    |  |
| chr15 Cufflinks exon25264174 25264295       | . | + | . | gene_id "XLOC_017281"; transcript_id "TCONS_00028804"; exon_number |  |
| "7"; oId "CUFF.30244.2"; tss_id "TSS21801"; |   |   |   |                                                                    |  |
| chr15 Cufflinks exon25264975 25265016       | . | + | . | gene_id "XLOC_017281"; transcript_id "TCONS_00028804"; exon_number |  |
| "8"; oId "CUFF.30244.2"; tss_id "TSS21801"; |   |   |   |                                                                    |  |

|       |                |          |          |   |   |   |                                                                                                                |
|-------|----------------|----------|----------|---|---|---|----------------------------------------------------------------------------------------------------------------|
| chr15 | Cufflinks exon | 25265737 | 25281845 | . | + | . | gene_id "XLOC_017281"; transcript_id "TCONS_00028804"; exon_number "9"; oId "CUFF.30244.2"; tss_id "TSS21801"; |
| chr15 | Cufflinks exon | 25224244 | 25224789 | . | + | . | gene_id "XLOC_017281"; transcript_id "TCONS_00028805"; exon_number "1"; oId "CUFF.30244.1"; tss_id "TSS21801"; |
| chr15 | Cufflinks exon | 25225094 | 25225231 | . | + | . | gene_id "XLOC_017281"; transcript_id "TCONS_00028805"; exon_number "2"; oId "CUFF.30244.1"; tss_id "TSS21801"; |
| chr15 | Cufflinks exon | 25226922 | 25240474 | . | + | . | gene_id "XLOC_017281"; transcript_id "TCONS_00028805"; exon_number "3"; oId "CUFF.30244.1"; tss_id "TSS21801"; |
| chr15 | Cufflinks exon | 25244117 | 25244225 | . | + | . | gene_id "XLOC_017281"; transcript_id "TCONS_00028805"; exon_number "4"; oId "CUFF.30244.1"; tss_id "TSS21801"; |
| chr15 | Cufflinks exon | 25245392 | 25245521 | . | + | . | gene_id "XLOC_017281"; transcript_id "TCONS_00028805"; exon_number "5"; oId "CUFF.30244.1"; tss_id "TSS21801"; |
| chr15 | Cufflinks exon | 25285950 | 25285980 | . | + | . | gene_id "XLOC_017281"; transcript_id "TCONS_00028805"; exon_number "6"; oId "CUFF.30244.1"; tss_id "TSS21801"; |
| chr15 | Cufflinks exon | 25224401 | 25224789 | . | + | . | gene_id "XLOC_017281"; transcript_id "TCONS_00028806"; exon_number "1"; oId "CUFF.30244.6"; tss_id "TSS21802"; |
| chr15 | Cufflinks exon | 25225094 | 25225231 | . | + | . | gene_id "XLOC_017281"; transcript_id "TCONS_00028806"; exon_number "2"; oId "CUFF.30244.6"; tss_id "TSS21802"; |
| chr15 | Cufflinks exon | 25226922 | 25227584 | . | + | . | gene_id "XLOC_017281"; transcript_id "TCONS_00028806"; exon_number "3"; oId "CUFF.30244.6"; tss_id "TSS21802"; |
| chr15 | Cufflinks exon | 25234849 | 25238610 | . | + | . | gene_id "XLOC_017281"; transcript_id "TCONS_00028806"; exon_number "4"; oId "CUFF.30244.6"; tss_id "TSS21802"; |
| chr15 | Cufflinks exon | 25224401 | 25224789 | . | + | . | gene_id "XLOC_017281"; transcript_id "TCONS_00028809"; exon_number "1"; oId "CUFF.30244.5"; tss_id "TSS21802"; |
| chr15 | Cufflinks exon | 25225094 | 25225231 | . | + | . | gene_id "XLOC_017281"; transcript_id "TCONS_00028809"; exon_number "2"; oId "CUFF.30244.5"; tss_id "TSS21802"; |
| chr15 | Cufflinks exon | 25226922 | 25227584 | . | + | . | gene_id "XLOC_017281"; transcript_id "TCONS_00028809"; exon_number "3"; oId "CUFF.30244.5"; tss_id "TSS21802"; |
| chr15 | Cufflinks exon | 25243513 | 25243633 | . | + | . | gene_id "XLOC_017281"; transcript_id "TCONS_00028809"; exon_number "4"; oId "CUFF.30244.5"; tss_id "TSS21802"; |
| chr15 | Cufflinks exon | 25244117 | 25244225 | . | + | . | gene_id "XLOC_017281"; transcript_id "TCONS_00028809"; exon_number "5"; oId "CUFF.30244.5"; tss_id "TSS21802"; |
| chr15 | Cufflinks exon | 25245392 | 25245521 | . | + | . | gene_id "XLOC_017281"; transcript_id "TCONS_00028809"; exon_number "6"; oId "CUFF.30244.5"; tss_id "TSS21802"; |
| chr15 | Cufflinks exon | 25246505 | 25247614 | . | + | . | gene_id "XLOC_017281"; transcript_id "TCONS_00028809"; exon_number "7"; oId "CUFF.30244.5"; tss_id "TSS21802"; |
| chr15 | Cufflinks exon | 25224401 | 25224789 | . | + | . | gene_id "XLOC_017281"; transcript_id "TCONS_00028808"; exon_number "1"; oId "CUFF.30244.4"; tss_id "TSS21802"; |
| chr15 | Cufflinks exon | 25225094 | 25225231 | . | + | . | gene_id "XLOC_017281"; transcript_id "TCONS_00028808"; exon_number "2"; oId "CUFF.30244.4"; tss_id "TSS21802"; |
| chr15 | Cufflinks exon | 25226922 | 25238998 | . | + | . | gene_id "XLOC_017281"; transcript_id "TCONS_00028808"; exon_number "3"; oId "CUFF.30244.4"; tss_id "TSS21802"; |
| chr15 | Cufflinks exon | 25239507 | 25243634 | . | + | . | gene_id "XLOC_017281"; transcript_id "TCONS_00028808"; exon_number                                             |

|                                              |           |      |          |          |   |                                                                        |
|----------------------------------------------|-----------|------|----------|----------|---|------------------------------------------------------------------------|
| "4"; oId "CUFF.30244.4"; tss_id "TSS21802";  |           |      |          |          |   |                                                                        |
| chr15                                        | Cufflinks | exon | 25244118 | 25244225 | . | + . gene_id "XLOC_017281"; transcript_id "TCONS_00028808"; exon_number |
| "5"; oId "CUFF.30244.4"; tss_id "TSS21802";  |           |      |          |          |   |                                                                        |
| chr15                                        | Cufflinks | exon | 25245392 | 25245521 | . | + . gene_id "XLOC_017281"; transcript_id "TCONS_00028808"; exon_number |
| "6"; oId "CUFF.30244.4"; tss_id "TSS21802";  |           |      |          |          |   |                                                                        |
| chr15                                        | Cufflinks | exon | 25246505 | 25247614 | . | + . gene_id "XLOC_017281"; transcript_id "TCONS_00028808"; exon_number |
| "7"; oId "CUFF.30244.4"; tss_id "TSS21802";  |           |      |          |          |   |                                                                        |
| chr15                                        | Cufflinks | exon | 25224401 | 25224789 | . | + . gene_id "XLOC_017281"; transcript_id "TCONS_00028807"; exon_number |
| "1"; oId "CUFF.30244.3"; tss_id "TSS21802";  |           |      |          |          |   |                                                                        |
| chr15                                        | Cufflinks | exon | 25225094 | 25225231 | . | + . gene_id "XLOC_017281"; transcript_id "TCONS_00028807"; exon_number |
| "2"; oId "CUFF.30244.3"; tss_id "TSS21802";  |           |      |          |          |   |                                                                        |
| chr15                                        | Cufflinks | exon | 25226922 | 25227584 | . | + . gene_id "XLOC_017281"; transcript_id "TCONS_00028807"; exon_number |
| "3"; oId "CUFF.30244.3"; tss_id "TSS21802";  |           |      |          |          |   |                                                                        |
| chr15                                        | Cufflinks | exon | 25243267 | 25243633 | . | + . gene_id "XLOC_017281"; transcript_id "TCONS_00028807"; exon_number |
| "4"; oId "CUFF.30244.3"; tss_id "TSS21802";  |           |      |          |          |   |                                                                        |
| chr15                                        | Cufflinks | exon | 25244117 | 25244225 | . | + . gene_id "XLOC_017281"; transcript_id "TCONS_00028807"; exon_number |
| "5"; oId "CUFF.30244.3"; tss_id "TSS21802";  |           |      |          |          |   |                                                                        |
| chr15                                        | Cufflinks | exon | 25245392 | 25245521 | . | + . gene_id "XLOC_017281"; transcript_id "TCONS_00028807"; exon_number |
| "6"; oId "CUFF.30244.3"; tss_id "TSS21802";  |           |      |          |          |   |                                                                        |
| chr15                                        | Cufflinks | exon | 25246505 | 25246820 | . | + . gene_id "XLOC_017281"; transcript_id "TCONS_00028807"; exon_number |
| "7"; oId "CUFF.30244.3"; tss_id "TSS21802";  |           |      |          |          |   |                                                                        |
| chr15                                        | Cufflinks | exon | 25247102 | 25247614 | . | + . gene_id "XLOC_017281"; transcript_id "TCONS_00028807"; exon_number |
| "8"; oId "CUFF.30244.3"; tss_id "TSS21802";  |           |      |          |          |   |                                                                        |
| chr15                                        | Cufflinks | exon | 25224401 | 25224789 | . | + . gene_id "XLOC_017281"; transcript_id "TCONS_00028810"; exon_number |
| "1"; oId "CUFF.30244.7"; tss_id "TSS21802";  |           |      |          |          |   |                                                                        |
| chr15                                        | Cufflinks | exon | 25225094 | 25225231 | . | + . gene_id "XLOC_017281"; transcript_id "TCONS_00028810"; exon_number |
| "2"; oId "CUFF.30244.7"; tss_id "TSS21802";  |           |      |          |          |   |                                                                        |
| chr15                                        | Cufflinks | exon | 25226922 | 25238998 | . | + . gene_id "XLOC_017281"; transcript_id "TCONS_00028810"; exon_number |
| "3"; oId "CUFF.30244.7"; tss_id "TSS21802";  |           |      |          |          |   |                                                                        |
| chr15                                        | Cufflinks | exon | 25239507 | 25243633 | . | + . gene_id "XLOC_017281"; transcript_id "TCONS_00028810"; exon_number |
| "4"; oId "CUFF.30244.7"; tss_id "TSS21802";  |           |      |          |          |   |                                                                        |
| chr15                                        | Cufflinks | exon | 25244117 | 25244225 | . | + . gene_id "XLOC_017281"; transcript_id "TCONS_00028810"; exon_number |
| "5"; oId "CUFF.30244.7"; tss_id "TSS21802";  |           |      |          |          |   |                                                                        |
| chr15                                        | Cufflinks | exon | 25245392 | 25245521 | . | + . gene_id "XLOC_017281"; transcript_id "TCONS_00028810"; exon_number |
| "6"; oId "CUFF.30244.7"; tss_id "TSS21802";  |           |      |          |          |   |                                                                        |
| chr15                                        | Cufflinks | exon | 25246505 | 25246860 | . | + . gene_id "XLOC_017281"; transcript_id "TCONS_00028810"; exon_number |
| "7"; oId "CUFF.30244.7"; tss_id "TSS21802";  |           |      |          |          |   |                                                                        |
| chr15                                        | Cufflinks | exon | 25247872 | 25248035 | . | + . gene_id "XLOC_017281"; transcript_id "TCONS_00028810"; exon_number |
| "8"; oId "CUFF.30244.7"; tss_id "TSS21802";  |           |      |          |          |   |                                                                        |
| chr15                                        | Cufflinks | exon | 25264174 | 25264295 | . | + . gene_id "XLOC_017281"; transcript_id "TCONS_00028810"; exon_number |
| "9"; oId "CUFF.30244.7"; tss_id "TSS21802";  |           |      |          |          |   |                                                                        |
| chr15                                        | Cufflinks | exon | 25264975 | 25265016 | . | + . gene_id "XLOC_017281"; transcript_id "TCONS_00028810"; exon_number |
| "10"; oId "CUFF.30244.7"; tss_id "TSS21802"; |           |      |          |          |   |                                                                        |

|       |                |          |          |   |   |   |                                                                                                                 |
|-------|----------------|----------|----------|---|---|---|-----------------------------------------------------------------------------------------------------------------|
| chr15 | Cufflinks exon | 25265737 | 25281845 | . | + | . | gene_id "XLOC_017281"; transcript_id "TCONS_00028810"; exon_number "11"; oId "CUFF.30244.7"; tss_id "TSS21802"; |
| chr15 | Cufflinks exon | 25224807 | 25225231 | . | + | . | gene_id "XLOC_017281"; transcript_id "TCONS_00028811"; exon_number "1"; oId "CUFF.30244.11"; tss_id "TSS21803"; |
| chr15 | Cufflinks exon | 25226922 | 25227584 | . | + | . | gene_id "XLOC_017281"; transcript_id "TCONS_00028811"; exon_number "2"; oId "CUFF.30244.11"; tss_id "TSS21803"; |
| chr15 | Cufflinks exon | 25243513 | 25243633 | . | + | . | gene_id "XLOC_017281"; transcript_id "TCONS_00028811"; exon_number "3"; oId "CUFF.30244.11"; tss_id "TSS21803"; |
| chr15 | Cufflinks exon | 25244117 | 25244225 | . | + | . | gene_id "XLOC_017281"; transcript_id "TCONS_00028811"; exon_number "4"; oId "CUFF.30244.11"; tss_id "TSS21803"; |
| chr15 | Cufflinks exon | 25245392 | 25245521 | . | + | . | gene_id "XLOC_017281"; transcript_id "TCONS_00028811"; exon_number "5"; oId "CUFF.30244.11"; tss_id "TSS21803"; |
| chr15 | Cufflinks exon | 25246505 | 25247614 | . | + | . | gene_id "XLOC_017281"; transcript_id "TCONS_00028811"; exon_number "6"; oId "CUFF.30244.11"; tss_id "TSS21803"; |
| chr15 | Cufflinks exon | 25224807 | 25225231 | . | + | . | gene_id "XLOC_017281"; transcript_id "TCONS_00028813"; exon_number "1"; oId "CUFF.30244.13"; tss_id "TSS21803"; |
| chr15 | Cufflinks exon | 25226922 | 25227584 | . | + | . | gene_id "XLOC_017281"; transcript_id "TCONS_00028813"; exon_number "2"; oId "CUFF.30244.13"; tss_id "TSS21803"; |
| chr15 | Cufflinks exon | 25238931 | 25243633 | . | + | . | gene_id "XLOC_017281"; transcript_id "TCONS_00028813"; exon_number "3"; oId "CUFF.30244.13"; tss_id "TSS21803"; |
| chr15 | Cufflinks exon | 25244117 | 25244225 | . | + | . | gene_id "XLOC_017281"; transcript_id "TCONS_00028813"; exon_number "4"; oId "CUFF.30244.13"; tss_id "TSS21803"; |
| chr15 | Cufflinks exon | 25245392 | 25245521 | . | + | . | gene_id "XLOC_017281"; transcript_id "TCONS_00028813"; exon_number "5"; oId "CUFF.30244.13"; tss_id "TSS21803"; |
| chr15 | Cufflinks exon | 25246505 | 25246820 | . | + | . | gene_id "XLOC_017281"; transcript_id "TCONS_00028813"; exon_number "6"; oId "CUFF.30244.13"; tss_id "TSS21803"; |
| chr15 | Cufflinks exon | 25247872 | 25248035 | . | + | . | gene_id "XLOC_017281"; transcript_id "TCONS_00028813"; exon_number "7"; oId "CUFF.30244.13"; tss_id "TSS21803"; |
| chr15 | Cufflinks exon | 25264174 | 25264295 | . | + | . | gene_id "XLOC_017281"; transcript_id "TCONS_00028813"; exon_number "8"; oId "CUFF.30244.13"; tss_id "TSS21803"; |
| chr15 | Cufflinks exon | 25264975 | 25265016 | . | + | . | gene_id "XLOC_017281"; transcript_id "TCONS_00028813"; exon_number "9"; oId "CUFF.30244.13"; tss_id "TSS21803"; |
| chr15 | Cufflinks exon | 25224807 | 25225231 | . | + | . | gene_id "XLOC_017281"; transcript_id "TCONS_00028812"; exon_number "1"; oId "CUFF.30244.10"; tss_id "TSS21803"; |
| chr15 | Cufflinks exon | 25226922 | 25227584 | . | + | . | gene_id "XLOC_017281"; transcript_id "TCONS_00028812"; exon_number "2"; oId "CUFF.30244.10"; tss_id "TSS21803"; |
| chr15 | Cufflinks exon | 25243267 | 25243633 | . | + | . | gene_id "XLOC_017281"; transcript_id "TCONS_00028812"; exon_number "3"; oId "CUFF.30244.10"; tss_id "TSS21803"; |
| chr15 | Cufflinks exon | 25244117 | 25244225 | . | + | . | gene_id "XLOC_017281"; transcript_id "TCONS_00028812"; exon_number "4"; oId "CUFF.30244.10"; tss_id "TSS21803"; |
| chr15 | Cufflinks exon | 25245392 | 25245521 | . | + | . | gene_id "XLOC_017281"; transcript_id "TCONS_00028812"; exon_number "5"; oId "CUFF.30244.10"; tss_id "TSS21803"; |
| chr15 | Cufflinks exon | 25246505 | 25246860 | . | + | . | gene_id "XLOC_017281"; transcript_id "TCONS_00028812"; exon_number "6"; oId "CUFF.30244.10"; tss_id "TSS21803"; |

|                                              |   |   |   |                                                                    |  |
|----------------------------------------------|---|---|---|--------------------------------------------------------------------|--|
| "6"; oId "CUFF.30244.10"; tss_id "TSS21803"; |   |   |   |                                                                    |  |
| chr15 Cufflinks exon25247872 25248035        | . | + | . | gene_id "XLOC_017281"; transcript_id "TCONS_00028812"; exon_number |  |
| "7"; oId "CUFF.30244.10"; tss_id "TSS21803"; |   |   |   |                                                                    |  |
| chr15 Cufflinks exon25264174 25264295        | . | + | . | gene_id "XLOC_017281"; transcript_id "TCONS_00028812"; exon_number |  |
| "8"; oId "CUFF.30244.10"; tss_id "TSS21803"; |   |   |   |                                                                    |  |
| chr15 Cufflinks exon25264975 25265016        | . | + | . | gene_id "XLOC_017281"; transcript_id "TCONS_00028812"; exon_number |  |
| "9"; oId "CUFF.30244.10"; tss_id "TSS21803"; |   |   |   |                                                                    |  |
| chr15 Cufflinks exon25224807 25225231        | . | + | . | gene_id "XLOC_017281"; transcript_id "TCONS_00028816"; exon_number |  |
| "1"; oId "CUFF.30244.9"; tss_id "TSS21803";  |   |   |   |                                                                    |  |
| chr15 Cufflinks exon25226922 25227584        | . | + | . | gene_id "XLOC_017281"; transcript_id "TCONS_00028816"; exon_number |  |
| "2"; oId "CUFF.30244.9"; tss_id "TSS21803";  |   |   |   |                                                                    |  |
| chr15 Cufflinks exon25238931 25243633        | . | + | . | gene_id "XLOC_017281"; transcript_id "TCONS_00028816"; exon_number |  |
| "3"; oId "CUFF.30244.9"; tss_id "TSS21803";  |   |   |   |                                                                    |  |
| chr15 Cufflinks exon25244117 25244225        | . | + | . | gene_id "XLOC_017281"; transcript_id "TCONS_00028816"; exon_number |  |
| "4"; oId "CUFF.30244.9"; tss_id "TSS21803";  |   |   |   |                                                                    |  |
| chr15 Cufflinks exon25245392 25245521        | . | + | . | gene_id "XLOC_017281"; transcript_id "TCONS_00028816"; exon_number |  |
| "5"; oId "CUFF.30244.9"; tss_id "TSS21803";  |   |   |   |                                                                    |  |
| chr15 Cufflinks exon25246505 25246860        | . | + | . | gene_id "XLOC_017281"; transcript_id "TCONS_00028816"; exon_number |  |
| "6"; oId "CUFF.30244.9"; tss_id "TSS21803";  |   |   |   |                                                                    |  |
| chr15 Cufflinks exon25247872 25248035        | . | + | . | gene_id "XLOC_017281"; transcript_id "TCONS_00028816"; exon_number |  |
| "7"; oId "CUFF.30244.9"; tss_id "TSS21803";  |   |   |   |                                                                    |  |
| chr15 Cufflinks exon25264174 25264295        | . | + | . | gene_id "XLOC_017281"; transcript_id "TCONS_00028816"; exon_number |  |
| "8"; oId "CUFF.30244.9"; tss_id "TSS21803";  |   |   |   |                                                                    |  |
| chr15 Cufflinks exon25264975 25265016        | . | + | . | gene_id "XLOC_017281"; transcript_id "TCONS_00028816"; exon_number |  |
| "9"; oId "CUFF.30244.9"; tss_id "TSS21803";  |   |   |   |                                                                    |  |
| chr15 Cufflinks exon25265737 25265908        | . | + | . | gene_id "XLOC_017281"; transcript_id "TCONS_00028816"; exon_number |  |
| "10"; oId "CUFF.30244.9"; tss_id "TSS21803"; |   |   |   |                                                                    |  |
| chr15 Cufflinks exon25267965 25281845        | . | + | . | gene_id "XLOC_017281"; transcript_id "TCONS_00028816"; exon_number |  |
| "11"; oId "CUFF.30244.9"; tss_id "TSS21803"; |   |   |   |                                                                    |  |
| chr15 Cufflinks exon25224807 25225231        | . | + | . | gene_id "XLOC_017281"; transcript_id "TCONS_00028815"; exon_number |  |
| "1"; oId "CUFF.30244.8"; tss_id "TSS21803";  |   |   |   |                                                                    |  |
| chr15 Cufflinks exon25226922 25227584        | . | + | . | gene_id "XLOC_017281"; transcript_id "TCONS_00028815"; exon_number |  |
| "2"; oId "CUFF.30244.8"; tss_id "TSS21803";  |   |   |   |                                                                    |  |
| chr15 Cufflinks exon25238931 25243634        | . | + | . | gene_id "XLOC_017281"; transcript_id "TCONS_00028815"; exon_number |  |
| "3"; oId "CUFF.30244.8"; tss_id "TSS21803";  |   |   |   |                                                                    |  |
| chr15 Cufflinks exon25244117 25244226        | . | + | . | gene_id "XLOC_017281"; transcript_id "TCONS_00028815"; exon_number |  |
| "4"; oId "CUFF.30244.8"; tss_id "TSS21803";  |   |   |   |                                                                    |  |
| chr15 Cufflinks exon25245392 25245521        | . | + | . | gene_id "XLOC_017281"; transcript_id "TCONS_00028815"; exon_number |  |
| "5"; oId "CUFF.30244.8"; tss_id "TSS21803";  |   |   |   |                                                                    |  |
| chr15 Cufflinks exon25246505 25246860        | . | + | . | gene_id "XLOC_017281"; transcript_id "TCONS_00028815"; exon_number |  |
| "6"; oId "CUFF.30244.8"; tss_id "TSS21803";  |   |   |   |                                                                    |  |
| chr15 Cufflinks exon25247872 25248035        | . | + | . | gene_id "XLOC_017281"; transcript_id "TCONS_00028815"; exon_number |  |
| "7"; oId "CUFF.30244.8"; tss_id "TSS21803";  |   |   |   |                                                                    |  |

|       |                |          |          |   |   |   |                                                                                                                  |
|-------|----------------|----------|----------|---|---|---|------------------------------------------------------------------------------------------------------------------|
| chr15 | Cufflinks exon | 25264174 | 25264295 | . | + | . | gene_id "XLOC_017281"; transcript_id "TCONS_00028815"; exon_number "8"; oId "CUFF.30244.8"; tss_id "TSS21803";   |
| chr15 | Cufflinks exon | 25264975 | 25265016 | . | + | . | gene_id "XLOC_017281"; transcript_id "TCONS_00028815"; exon_number "9"; oId "CUFF.30244.8"; tss_id "TSS21803";   |
| chr15 | Cufflinks exon | 25265737 | 25265908 | . | + | . | gene_id "XLOC_017281"; transcript_id "TCONS_00028815"; exon_number "10"; oId "CUFF.30244.8"; tss_id "TSS21803";  |
| chr15 | Cufflinks exon | 25267965 | 25281845 | . | + | . | gene_id "XLOC_017281"; transcript_id "TCONS_00028815"; exon_number "11"; oId "CUFF.30244.8"; tss_id "TSS21803";  |
| chr15 | Cufflinks exon | 25224807 | 25225231 | . | + | . | gene_id "XLOC_017281"; transcript_id "TCONS_00028814"; exon_number "1"; oId "CUFF.30244.12"; tss_id "TSS21803";  |
| chr15 | Cufflinks exon | 25226922 | 25227584 | . | + | . | gene_id "XLOC_017281"; transcript_id "TCONS_00028814"; exon_number "2"; oId "CUFF.30244.12"; tss_id "TSS21803";  |
| chr15 | Cufflinks exon | 25238931 | 25243633 | . | + | . | gene_id "XLOC_017281"; transcript_id "TCONS_00028814"; exon_number "3"; oId "CUFF.30244.12"; tss_id "TSS21803";  |
| chr15 | Cufflinks exon | 25244117 | 25244225 | . | + | . | gene_id "XLOC_017281"; transcript_id "TCONS_00028814"; exon_number "4"; oId "CUFF.30244.12"; tss_id "TSS21803";  |
| chr15 | Cufflinks exon | 25245392 | 25245521 | . | + | . | gene_id "XLOC_017281"; transcript_id "TCONS_00028814"; exon_number "5"; oId "CUFF.30244.12"; tss_id "TSS21803";  |
| chr15 | Cufflinks exon | 25246505 | 25246860 | . | + | . | gene_id "XLOC_017281"; transcript_id "TCONS_00028814"; exon_number "6"; oId "CUFF.30244.12"; tss_id "TSS21803";  |
| chr15 | Cufflinks exon | 25247872 | 25248035 | . | + | . | gene_id "XLOC_017281"; transcript_id "TCONS_00028814"; exon_number "7"; oId "CUFF.30244.12"; tss_id "TSS21803";  |
| chr15 | Cufflinks exon | 25264174 | 25264295 | . | + | . | gene_id "XLOC_017281"; transcript_id "TCONS_00028814"; exon_number "8"; oId "CUFF.30244.12"; tss_id "TSS21803";  |
| chr15 | Cufflinks exon | 25264975 | 25265016 | . | + | . | gene_id "XLOC_017281"; transcript_id "TCONS_00028814"; exon_number "9"; oId "CUFF.30244.12"; tss_id "TSS21803";  |
| chr15 | Cufflinks exon | 25265737 | 25281845 | . | + | . | gene_id "XLOC_017281"; transcript_id "TCONS_00028814"; exon_number "10"; oId "CUFF.30244.12"; tss_id "TSS21803"; |
| chr15 | Cufflinks exon | 25225148 | 25225231 | . | + | . | gene_id "XLOC_017281"; transcript_id "TCONS_00028817"; exon_number "1"; oId "CUFF.30244.14"; tss_id "TSS21804";  |
| chr15 | Cufflinks exon | 25226922 | 25227584 | . | + | . | gene_id "XLOC_017281"; transcript_id "TCONS_00028817"; exon_number "2"; oId "CUFF.30244.14"; tss_id "TSS21804";  |
| chr15 | Cufflinks exon | 25243267 | 25243633 | . | + | . | gene_id "XLOC_017281"; transcript_id "TCONS_00028817"; exon_number "3"; oId "CUFF.30244.14"; tss_id "TSS21804";  |
| chr15 | Cufflinks exon | 25244117 | 25244225 | . | + | . | gene_id "XLOC_017281"; transcript_id "TCONS_00028817"; exon_number "4"; oId "CUFF.30244.14"; tss_id "TSS21804";  |
| chr15 | Cufflinks exon | 25245392 | 25245521 | . | + | . | gene_id "XLOC_017281"; transcript_id "TCONS_00028817"; exon_number "5"; oId "CUFF.30244.14"; tss_id "TSS21804";  |
| chr15 | Cufflinks exon | 25246505 | 25247614 | . | + | . | gene_id "XLOC_017281"; transcript_id "TCONS_00028817"; exon_number "6"; oId "CUFF.30244.14"; tss_id "TSS21804";  |
| chr15 | Cufflinks exon | 25226958 | 25227584 | . | + | . | gene_id "XLOC_017281"; transcript_id "TCONS_00028818"; exon_number "1"; oId "CUFF.30244.16"; tss_id "TSS21805";  |
| chr15 | Cufflinks exon | 25238931 | 25239005 | . | + | . | gene_id "XLOC_017281"; transcript_id "TCONS_00028818"; exon_number                                               |





|       |                |          |          |   |   |   |                                                                                                                 |
|-------|----------------|----------|----------|---|---|---|-----------------------------------------------------------------------------------------------------------------|
| chr15 | Cufflinks exon | 25298975 | 25299114 | . | + | . | gene_id "XLOC_017287"; transcript_id "TCONS_00028828"; exon_number "4"; oId "CUFF.30253.2"; tss_id "TSS21813";  |
| chr15 | Cufflinks exon | 25301630 | 25301769 | . | + | . | gene_id "XLOC_017287"; transcript_id "TCONS_00028828"; exon_number "5"; oId "CUFF.30253.2"; tss_id "TSS21813";  |
| chr15 | Cufflinks exon | 25304302 | 25304441 | . | + | . | gene_id "XLOC_017287"; transcript_id "TCONS_00028828"; exon_number "6"; oId "CUFF.30253.2"; tss_id "TSS21813";  |
| chr15 | Cufflinks exon | 25304604 | 25304865 | . | + | . | gene_id "XLOC_017287"; transcript_id "TCONS_00028828"; exon_number "7"; oId "CUFF.30253.2"; tss_id "TSS21813";  |
| chr15 | Cufflinks exon | 25306453 | 25306560 | . | + | . | gene_id "XLOC_017287"; transcript_id "TCONS_00028828"; exon_number "8"; oId "CUFF.30253.2"; tss_id "TSS21813";  |
| chr15 | Cufflinks exon | 25307097 | 25307235 | . | + | . | gene_id "XLOC_017287"; transcript_id "TCONS_00028828"; exon_number "9"; oId "CUFF.30253.2"; tss_id "TSS21813";  |
| chr15 | Cufflinks exon | 25309862 | 25310002 | . | + | . | gene_id "XLOC_017287"; transcript_id "TCONS_00028828"; exon_number "10"; oId "CUFF.30253.2"; tss_id "TSS21813"; |
| chr15 | Cufflinks exon | 25315267 | 25315406 | . | + | . | gene_id "XLOC_017287"; transcript_id "TCONS_00028828"; exon_number "11"; oId "CUFF.30253.2"; tss_id "TSS21813"; |
| chr15 | Cufflinks exon | 25317872 | 25318010 | . | + | . | gene_id "XLOC_017287"; transcript_id "TCONS_00028828"; exon_number "12"; oId "CUFF.30253.2"; tss_id "TSS21813"; |
| chr15 | Cufflinks exon | 25319039 | 25319198 | . | + | . | gene_id "XLOC_017287"; transcript_id "TCONS_00028828"; exon_number "13"; oId "CUFF.30253.2"; tss_id "TSS21813"; |
| chr15 | Cufflinks exon | 25320882 | 25321013 | . | + | . | gene_id "XLOC_017287"; transcript_id "TCONS_00028828"; exon_number "14"; oId "CUFF.30253.2"; tss_id "TSS21813"; |
| chr15 | Cufflinks exon | 25322004 | 25322137 | . | + | . | gene_id "XLOC_017287"; transcript_id "TCONS_00028828"; exon_number "15"; oId "CUFF.30253.2"; tss_id "TSS21813"; |
| chr15 | Cufflinks exon | 25324009 | 25324142 | . | + | . | gene_id "XLOC_017287"; transcript_id "TCONS_00028828"; exon_number "16"; oId "CUFF.30253.2"; tss_id "TSS21813"; |
| chr15 | Cufflinks exon | 25326238 | 25326371 | . | + | . | gene_id "XLOC_017287"; transcript_id "TCONS_00028828"; exon_number "17"; oId "CUFF.30253.2"; tss_id "TSS21813"; |
| chr15 | Cufflinks exon | 25327736 | 25327852 | . | + | . | gene_id "XLOC_017287"; transcript_id "TCONS_00028828"; exon_number "18"; oId "CUFF.30253.2"; tss_id "TSS21813"; |
| chr15 | Cufflinks exon | 25328543 | 25328674 | . | + | . | gene_id "XLOC_017287"; transcript_id "TCONS_00028828"; exon_number "19"; oId "CUFF.30253.2"; tss_id "TSS21813"; |
| chr15 | Cufflinks exon | 25330337 | 25330469 | . | + | . | gene_id "XLOC_017287"; transcript_id "TCONS_00028828"; exon_number "20"; oId "CUFF.30253.2"; tss_id "TSS21813"; |
| chr15 | Cufflinks exon | 25332614 | 25332746 | . | + | . | gene_id "XLOC_017287"; transcript_id "TCONS_00028828"; exon_number "21"; oId "CUFF.30253.2"; tss_id "TSS21813"; |
| chr15 | Cufflinks exon | 25334761 | 25335013 | . | + | . | gene_id "XLOC_017287"; transcript_id "TCONS_00028828"; exon_number "22"; oId "CUFF.30253.2"; tss_id "TSS21813"; |
| chr15 | Cufflinks exon | 25336737 | 25336866 | . | + | . | gene_id "XLOC_017287"; transcript_id "TCONS_00028828"; exon_number "23"; oId "CUFF.30253.2"; tss_id "TSS21813"; |
| chr15 | Cufflinks exon | 25338981 | 25339121 | . | + | . | gene_id "XLOC_017287"; transcript_id "TCONS_00028828"; exon_number "24"; oId "CUFF.30253.2"; tss_id "TSS21813"; |
| chr15 | Cufflinks exon | 25340774 | 25340975 | . | + | . | gene_id "XLOC_017287"; transcript_id "TCONS_00028828"; exon_number "25"; oId "CUFF.30253.2"; tss_id "TSS21813"; |



|       |                |          |          |   |   |   |                                                                                                                 |
|-------|----------------|----------|----------|---|---|---|-----------------------------------------------------------------------------------------------------------------|
| chr15 | Cufflinks exon | 25304604 | 25304865 | . | + | . | gene_id "XLOC_017287"; transcript_id "TCONS_00028827"; exon_number "7"; oId "CUFF.30253.1"; tss_id "TSS21813";  |
| chr15 | Cufflinks exon | 25306453 | 25306560 | . | + | . | gene_id "XLOC_017287"; transcript_id "TCONS_00028827"; exon_number "8"; oId "CUFF.30253.1"; tss_id "TSS21813";  |
| chr15 | Cufflinks exon | 25307097 | 25307235 | . | + | . | gene_id "XLOC_017287"; transcript_id "TCONS_00028827"; exon_number "9"; oId "CUFF.30253.1"; tss_id "TSS21813";  |
| chr15 | Cufflinks exon | 25309862 | 25310002 | . | + | . | gene_id "XLOC_017287"; transcript_id "TCONS_00028827"; exon_number "10"; oId "CUFF.30253.1"; tss_id "TSS21813"; |
| chr15 | Cufflinks exon | 25315267 | 25315406 | . | + | . | gene_id "XLOC_017287"; transcript_id "TCONS_00028827"; exon_number "11"; oId "CUFF.30253.1"; tss_id "TSS21813"; |
| chr15 | Cufflinks exon | 25317872 | 25318010 | . | + | . | gene_id "XLOC_017287"; transcript_id "TCONS_00028827"; exon_number "12"; oId "CUFF.30253.1"; tss_id "TSS21813"; |
| chr15 | Cufflinks exon | 25319039 | 25319198 | . | + | . | gene_id "XLOC_017287"; transcript_id "TCONS_00028827"; exon_number "13"; oId "CUFF.30253.1"; tss_id "TSS21813"; |
| chr15 | Cufflinks exon | 25320882 | 25321013 | . | + | . | gene_id "XLOC_017287"; transcript_id "TCONS_00028827"; exon_number "14"; oId "CUFF.30253.1"; tss_id "TSS21813"; |
| chr15 | Cufflinks exon | 25322004 | 25322137 | . | + | . | gene_id "XLOC_017287"; transcript_id "TCONS_00028827"; exon_number "15"; oId "CUFF.30253.1"; tss_id "TSS21813"; |
| chr15 | Cufflinks exon | 25324009 | 25324142 | . | + | . | gene_id "XLOC_017287"; transcript_id "TCONS_00028827"; exon_number "16"; oId "CUFF.30253.1"; tss_id "TSS21813"; |
| chr15 | Cufflinks exon | 25326238 | 25326371 | . | + | . | gene_id "XLOC_017287"; transcript_id "TCONS_00028827"; exon_number "17"; oId "CUFF.30253.1"; tss_id "TSS21813"; |
| chr15 | Cufflinks exon | 25327736 | 25327852 | . | + | . | gene_id "XLOC_017287"; transcript_id "TCONS_00028827"; exon_number "18"; oId "CUFF.30253.1"; tss_id "TSS21813"; |
| chr15 | Cufflinks exon | 25328543 | 25328674 | . | + | . | gene_id "XLOC_017287"; transcript_id "TCONS_00028827"; exon_number "19"; oId "CUFF.30253.1"; tss_id "TSS21813"; |
| chr15 | Cufflinks exon | 25330337 | 25330469 | . | + | . | gene_id "XLOC_017287"; transcript_id "TCONS_00028827"; exon_number "20"; oId "CUFF.30253.1"; tss_id "TSS21813"; |
| chr15 | Cufflinks exon | 25331482 | 25331611 | . | + | . | gene_id "XLOC_017287"; transcript_id "TCONS_00028827"; exon_number "21"; oId "CUFF.30253.1"; tss_id "TSS21813"; |
| chr15 | Cufflinks exon | 25332614 | 25332746 | . | + | . | gene_id "XLOC_017287"; transcript_id "TCONS_00028827"; exon_number "22"; oId "CUFF.30253.1"; tss_id "TSS21813"; |
| chr15 | Cufflinks exon | 25333726 | 25333888 | . | + | . | gene_id "XLOC_017287"; transcript_id "TCONS_00028827"; exon_number "23"; oId "CUFF.30253.1"; tss_id "TSS21813"; |
| chr15 | Cufflinks exon | 25334761 | 25335013 | . | + | . | gene_id "XLOC_017287"; transcript_id "TCONS_00028827"; exon_number "24"; oId "CUFF.30253.1"; tss_id "TSS21813"; |
| chr15 | Cufflinks exon | 25336737 | 25336866 | . | + | . | gene_id "XLOC_017287"; transcript_id "TCONS_00028827"; exon_number "25"; oId "CUFF.30253.1"; tss_id "TSS21813"; |
| chr15 | Cufflinks exon | 25338981 | 25339121 | . | + | . | gene_id "XLOC_017287"; transcript_id "TCONS_00028827"; exon_number "26"; oId "CUFF.30253.1"; tss_id "TSS21813"; |
| chr15 | Cufflinks exon | 25340774 | 25340975 | . | + | . | gene_id "XLOC_017287"; transcript_id "TCONS_00028827"; exon_number "27"; oId "CUFF.30253.1"; tss_id "TSS21813"; |
| chr15 | Cufflinks exon | 25342468 | 25342586 | . | + | . | gene_id "XLOC_017287"; transcript_id "TCONS_00028827"; exon_number "28"; oId "CUFF.30253.1"; tss_id "TSS21813"; |

|                                              |   |   |   |                                                                    |  |
|----------------------------------------------|---|---|---|--------------------------------------------------------------------|--|
| "28"; oId "CUFF.30253.1"; tss_id "TSS21813"; |   |   |   |                                                                    |  |
| chr15 Cufflinks exon25343864 25343975        | . | + | . | gene_id "XLOC_017287"; transcript_id "TCONS_00028827"; exon_number |  |
| "29"; oId "CUFF.30253.1"; tss_id "TSS21813"; |   |   |   |                                                                    |  |
| chr15 Cufflinks exon25344292 25344425        | . | + | . | gene_id "XLOC_017287"; transcript_id "TCONS_00028827"; exon_number |  |
| "30"; oId "CUFF.30253.1"; tss_id "TSS21813"; |   |   |   |                                                                    |  |
| chr15 Cufflinks exon25345926 25346037        | . | + | . | gene_id "XLOC_017287"; transcript_id "TCONS_00028827"; exon_number |  |
| "31"; oId "CUFF.30253.1"; tss_id "TSS21813"; |   |   |   |                                                                    |  |
| chr15 Cufflinks exon25349006 25349117        | . | + | . | gene_id "XLOC_017287"; transcript_id "TCONS_00028827"; exon_number |  |
| "32"; oId "CUFF.30253.1"; tss_id "TSS21813"; |   |   |   |                                                                    |  |
| chr15 Cufflinks exon25351311 25351441        | . | + | . | gene_id "XLOC_017287"; transcript_id "TCONS_00028827"; exon_number |  |
| "33"; oId "CUFF.30253.1"; tss_id "TSS21813"; |   |   |   |                                                                    |  |
| chr15 Cufflinks exon25352619 25352735        | . | + | . | gene_id "XLOC_017287"; transcript_id "TCONS_00028827"; exon_number |  |
| "34"; oId "CUFF.30253.1"; tss_id "TSS21813"; |   |   |   |                                                                    |  |
| chr15 Cufflinks exon25353057 25353185        | . | + | . | gene_id "XLOC_017287"; transcript_id "TCONS_00028827"; exon_number |  |
| "35"; oId "CUFF.30253.1"; tss_id "TSS21813"; |   |   |   |                                                                    |  |
| chr15 Cufflinks exon25354145 25354250        | . | + | . | gene_id "XLOC_017287"; transcript_id "TCONS_00028827"; exon_number |  |
| "36"; oId "CUFF.30253.1"; tss_id "TSS21813"; |   |   |   |                                                                    |  |
| chr15 Cufflinks exon25354345 25354550        | . | + | . | gene_id "XLOC_017287"; transcript_id "TCONS_00028827"; exon_number |  |
| "37"; oId "CUFF.30253.1"; tss_id "TSS21813"; |   |   |   |                                                                    |  |
| chr15 Cufflinks exon25354702 25354862        | . | + | . | gene_id "XLOC_017287"; transcript_id "TCONS_00028827"; exon_number |  |
| "38"; oId "CUFF.30253.1"; tss_id "TSS21813"; |   |   |   |                                                                    |  |
| chr15 Cufflinks exon25356912 25357041        | . | + | . | gene_id "XLOC_017287"; transcript_id "TCONS_00028827"; exon_number |  |
| "39"; oId "CUFF.30253.1"; tss_id "TSS21813"; |   |   |   |                                                                    |  |
| chr15 Cufflinks exon25360446 25360803        | . | + | . | gene_id "XLOC_017287"; transcript_id "TCONS_00028827"; exon_number |  |
| "40"; oId "CUFF.30253.1"; tss_id "TSS21813"; |   |   |   |                                                                    |  |
| chr15 Cufflinks exon25362557 25362662        | . | + | . | gene_id "XLOC_017287"; transcript_id "TCONS_00028827"; exon_number |  |
| "41"; oId "CUFF.30253.1"; tss_id "TSS21813"; |   |   |   |                                                                    |  |
| chr15 Cufflinks exon25363415 25363529        | . | + | . | gene_id "XLOC_017287"; transcript_id "TCONS_00028827"; exon_number |  |
| "42"; oId "CUFF.30253.1"; tss_id "TSS21813"; |   |   |   |                                                                    |  |
| chr15 Cufflinks exon25364212 25367623        | . | + | . | gene_id "XLOC_017287"; transcript_id "TCONS_00028827"; exon_number |  |
| "43"; oId "CUFF.30253.1"; tss_id "TSS21813"; |   |   |   |                                                                    |  |
| chr15 Cufflinks exon25287091 25288057        | . | + | . | gene_id "XLOC_017287"; transcript_id "TCONS_00028829"; exon_number |  |
| "1"; oId "CUFF.30253.3"; tss_id "TSS21813";  |   |   |   |                                                                    |  |
| chr15 Cufflinks exon25296249 25296383        | . | + | . | gene_id "XLOC_017287"; transcript_id "TCONS_00028829"; exon_number |  |
| "2"; oId "CUFF.30253.3"; tss_id "TSS21813";  |   |   |   |                                                                    |  |
| chr15 Cufflinks exon25298975 25299114        | . | + | . | gene_id "XLOC_017287"; transcript_id "TCONS_00028829"; exon_number |  |
| "3"; oId "CUFF.30253.3"; tss_id "TSS21813";  |   |   |   |                                                                    |  |
| chr15 Cufflinks exon25301630 25301769        | . | + | . | gene_id "XLOC_017287"; transcript_id "TCONS_00028829"; exon_number |  |
| "4"; oId "CUFF.30253.3"; tss_id "TSS21813";  |   |   |   |                                                                    |  |
| chr15 Cufflinks exon25304302 25304441        | . | + | . | gene_id "XLOC_017287"; transcript_id "TCONS_00028829"; exon_number |  |
| "5"; oId "CUFF.30253.3"; tss_id "TSS21813";  |   |   |   |                                                                    |  |
| chr15 Cufflinks exon25304604 25304865        | . | + | . | gene_id "XLOC_017287"; transcript_id "TCONS_00028829"; exon_number |  |
| "6"; oId "CUFF.30253.3"; tss_id "TSS21813";  |   |   |   |                                                                    |  |

|       |                |          |          |   |   |   |                                                                                                                 |
|-------|----------------|----------|----------|---|---|---|-----------------------------------------------------------------------------------------------------------------|
| chr15 | Cufflinks exon | 25306453 | 25306560 | . | + | . | gene_id "XLOC_017287"; transcript_id "TCONS_00028829"; exon_number "7"; oId "CUFF.30253.3"; tss_id "TSS21813";  |
| chr15 | Cufflinks exon | 25307097 | 25307235 | . | + | . | gene_id "XLOC_017287"; transcript_id "TCONS_00028829"; exon_number "8"; oId "CUFF.30253.3"; tss_id "TSS21813";  |
| chr15 | Cufflinks exon | 25309862 | 25310002 | . | + | . | gene_id "XLOC_017287"; transcript_id "TCONS_00028829"; exon_number "9"; oId "CUFF.30253.3"; tss_id "TSS21813";  |
| chr15 | Cufflinks exon | 25315267 | 25315406 | . | + | . | gene_id "XLOC_017287"; transcript_id "TCONS_00028829"; exon_number "10"; oId "CUFF.30253.3"; tss_id "TSS21813"; |
| chr15 | Cufflinks exon | 25317872 | 25318010 | . | + | . | gene_id "XLOC_017287"; transcript_id "TCONS_00028829"; exon_number "11"; oId "CUFF.30253.3"; tss_id "TSS21813"; |
| chr15 | Cufflinks exon | 25319039 | 25319198 | . | + | . | gene_id "XLOC_017287"; transcript_id "TCONS_00028829"; exon_number "12"; oId "CUFF.30253.3"; tss_id "TSS21813"; |
| chr15 | Cufflinks exon | 25320882 | 25321013 | . | + | . | gene_id "XLOC_017287"; transcript_id "TCONS_00028829"; exon_number "13"; oId "CUFF.30253.3"; tss_id "TSS21813"; |
| chr15 | Cufflinks exon | 25322004 | 25322137 | . | + | . | gene_id "XLOC_017287"; transcript_id "TCONS_00028829"; exon_number "14"; oId "CUFF.30253.3"; tss_id "TSS21813"; |
| chr15 | Cufflinks exon | 25324009 | 25324142 | . | + | . | gene_id "XLOC_017287"; transcript_id "TCONS_00028829"; exon_number "15"; oId "CUFF.30253.3"; tss_id "TSS21813"; |
| chr15 | Cufflinks exon | 25326238 | 25326371 | . | + | . | gene_id "XLOC_017287"; transcript_id "TCONS_00028829"; exon_number "16"; oId "CUFF.30253.3"; tss_id "TSS21813"; |
| chr15 | Cufflinks exon | 25327736 | 25327852 | . | + | . | gene_id "XLOC_017287"; transcript_id "TCONS_00028829"; exon_number "17"; oId "CUFF.30253.3"; tss_id "TSS21813"; |
| chr15 | Cufflinks exon | 25328543 | 25328674 | . | + | . | gene_id "XLOC_017287"; transcript_id "TCONS_00028829"; exon_number "18"; oId "CUFF.30253.3"; tss_id "TSS21813"; |
| chr15 | Cufflinks exon | 25330337 | 25330469 | . | + | . | gene_id "XLOC_017287"; transcript_id "TCONS_00028829"; exon_number "19"; oId "CUFF.30253.3"; tss_id "TSS21813"; |
| chr15 | Cufflinks exon | 25332614 | 25332746 | . | + | . | gene_id "XLOC_017287"; transcript_id "TCONS_00028829"; exon_number "20"; oId "CUFF.30253.3"; tss_id "TSS21813"; |
| chr15 | Cufflinks exon | 25334761 | 25335013 | . | + | . | gene_id "XLOC_017287"; transcript_id "TCONS_00028829"; exon_number "21"; oId "CUFF.30253.3"; tss_id "TSS21813"; |
| chr15 | Cufflinks exon | 25336737 | 25336866 | . | + | . | gene_id "XLOC_017287"; transcript_id "TCONS_00028829"; exon_number "22"; oId "CUFF.30253.3"; tss_id "TSS21813"; |
| chr15 | Cufflinks exon | 25338981 | 25339121 | . | + | . | gene_id "XLOC_017287"; transcript_id "TCONS_00028829"; exon_number "23"; oId "CUFF.30253.3"; tss_id "TSS21813"; |
| chr15 | Cufflinks exon | 25340774 | 25340975 | . | + | . | gene_id "XLOC_017287"; transcript_id "TCONS_00028829"; exon_number "24"; oId "CUFF.30253.3"; tss_id "TSS21813"; |
| chr15 | Cufflinks exon | 25342468 | 25342586 | . | + | . | gene_id "XLOC_017287"; transcript_id "TCONS_00028829"; exon_number "25"; oId "CUFF.30253.3"; tss_id "TSS21813"; |
| chr15 | Cufflinks exon | 25343864 | 25343975 | . | + | . | gene_id "XLOC_017287"; transcript_id "TCONS_00028829"; exon_number "26"; oId "CUFF.30253.3"; tss_id "TSS21813"; |
| chr15 | Cufflinks exon | 25344292 | 25344425 | . | + | . | gene_id "XLOC_017287"; transcript_id "TCONS_00028829"; exon_number "27"; oId "CUFF.30253.3"; tss_id "TSS21813"; |
| chr15 | Cufflinks exon | 25349006 | 25349117 | . | + | . | gene_id "XLOC_017287"; transcript_id "TCONS_00028829"; exon_number "28"; oId "CUFF.30253.3"; tss_id "TSS21813"; |

|                                              |   |   |   |                                                                    |  |
|----------------------------------------------|---|---|---|--------------------------------------------------------------------|--|
| "28"; oId "CUFF.30253.3"; tss_id "TSS21813"; |   |   |   |                                                                    |  |
| chr15 Cufflinks exon25350847 25350971        | . | + | . | gene_id "XLOC_017287"; transcript_id "TCONS_00028829"; exon_number |  |
| "29"; oId "CUFF.30253.3"; tss_id "TSS21813"; |   |   |   |                                                                    |  |
| chr15 Cufflinks exon25351311 25351441        | . | + | . | gene_id "XLOC_017287"; transcript_id "TCONS_00028829"; exon_number |  |
| "30"; oId "CUFF.30253.3"; tss_id "TSS21813"; |   |   |   |                                                                    |  |
| chr15 Cufflinks exon25352619 25352735        | . | + | . | gene_id "XLOC_017287"; transcript_id "TCONS_00028829"; exon_number |  |
| "31"; oId "CUFF.30253.3"; tss_id "TSS21813"; |   |   |   |                                                                    |  |
| chr15 Cufflinks exon25353057 25353185        | . | + | . | gene_id "XLOC_017287"; transcript_id "TCONS_00028829"; exon_number |  |
| "32"; oId "CUFF.30253.3"; tss_id "TSS21813"; |   |   |   |                                                                    |  |
| chr15 Cufflinks exon25354145 25354250        | . | + | . | gene_id "XLOC_017287"; transcript_id "TCONS_00028829"; exon_number |  |
| "33"; oId "CUFF.30253.3"; tss_id "TSS21813"; |   |   |   |                                                                    |  |
| chr15 Cufflinks exon25354345 25354550        | . | + | . | gene_id "XLOC_017287"; transcript_id "TCONS_00028829"; exon_number |  |
| "34"; oId "CUFF.30253.3"; tss_id "TSS21813"; |   |   |   |                                                                    |  |
| chr15 Cufflinks exon25354702 25354862        | . | + | . | gene_id "XLOC_017287"; transcript_id "TCONS_00028829"; exon_number |  |
| "35"; oId "CUFF.30253.3"; tss_id "TSS21813"; |   |   |   |                                                                    |  |
| chr15 Cufflinks exon25356912 25357041        | . | + | . | gene_id "XLOC_017287"; transcript_id "TCONS_00028829"; exon_number |  |
| "36"; oId "CUFF.30253.3"; tss_id "TSS21813"; |   |   |   |                                                                    |  |
| chr15 Cufflinks exon25360446 25360803        | . | + | . | gene_id "XLOC_017287"; transcript_id "TCONS_00028829"; exon_number |  |
| "37"; oId "CUFF.30253.3"; tss_id "TSS21813"; |   |   |   |                                                                    |  |
| chr15 Cufflinks exon25362557 25362662        | . | + | . | gene_id "XLOC_017287"; transcript_id "TCONS_00028829"; exon_number |  |
| "38"; oId "CUFF.30253.3"; tss_id "TSS21813"; |   |   |   |                                                                    |  |
| chr15 Cufflinks exon25363415 25363529        | . | + | . | gene_id "XLOC_017287"; transcript_id "TCONS_00028829"; exon_number |  |
| "39"; oId "CUFF.30253.3"; tss_id "TSS21813"; |   |   |   |                                                                    |  |
| chr15 Cufflinks exon25364212 25367623        | . | + | . | gene_id "XLOC_017287"; transcript_id "TCONS_00028829"; exon_number |  |
| "40"; oId "CUFF.30253.3"; tss_id "TSS21813"; |   |   |   |                                                                    |  |
| chr15 Cufflinks exon25287134 25287352        | . | + | . | gene_id "XLOC_017287"; transcript_id "TCONS_00028830"; exon_number |  |
| "1"; oId "CUFF.30253.4"; tss_id "TSS21813";  |   |   |   |                                                                    |  |
| chr15 Cufflinks exon25287628 25288057        | . | + | . | gene_id "XLOC_017287"; transcript_id "TCONS_00028830"; exon_number |  |
| "2"; oId "CUFF.30253.4"; tss_id "TSS21813";  |   |   |   |                                                                    |  |
| chr15 Cufflinks exon25296249 25296383        | . | + | . | gene_id "XLOC_017287"; transcript_id "TCONS_00028830"; exon_number |  |
| "3"; oId "CUFF.30253.4"; tss_id "TSS21813";  |   |   |   |                                                                    |  |
| chr15 Cufflinks exon25298975 25299114        | . | + | . | gene_id "XLOC_017287"; transcript_id "TCONS_00028830"; exon_number |  |
| "4"; oId "CUFF.30253.4"; tss_id "TSS21813";  |   |   |   |                                                                    |  |
| chr15 Cufflinks exon25301630 25301769        | . | + | . | gene_id "XLOC_017287"; transcript_id "TCONS_00028830"; exon_number |  |
| "5"; oId "CUFF.30253.4"; tss_id "TSS21813";  |   |   |   |                                                                    |  |
| chr15 Cufflinks exon25304302 25304441        | . | + | . | gene_id "XLOC_017287"; transcript_id "TCONS_00028830"; exon_number |  |
| "6"; oId "CUFF.30253.4"; tss_id "TSS21813";  |   |   |   |                                                                    |  |
| chr15 Cufflinks exon25304604 25304865        | . | + | . | gene_id "XLOC_017287"; transcript_id "TCONS_00028830"; exon_number |  |
| "7"; oId "CUFF.30253.4"; tss_id "TSS21813";  |   |   |   |                                                                    |  |
| chr15 Cufflinks exon25307097 25307235        | . | + | . | gene_id "XLOC_017287"; transcript_id "TCONS_00028830"; exon_number |  |
| "8"; oId "CUFF.30253.4"; tss_id "TSS21813";  |   |   |   |                                                                    |  |
| chr15 Cufflinks exon25309862 25310002        | . | + | . | gene_id "XLOC_017287"; transcript_id "TCONS_00028830"; exon_number |  |
| "9"; oId "CUFF.30253.4"; tss_id "TSS21813";  |   |   |   |                                                                    |  |

|       |                |          |          |   |   |   |                                                                                                                 |
|-------|----------------|----------|----------|---|---|---|-----------------------------------------------------------------------------------------------------------------|
| chr15 | Cufflinks exon | 25315267 | 25315406 | . | + | . | gene_id "XLOC_017287"; transcript_id "TCONS_00028830"; exon_number "10"; oId "CUFF.30253.4"; tss_id "TSS21813"; |
| chr15 | Cufflinks exon | 25317872 | 25318010 | . | + | . | gene_id "XLOC_017287"; transcript_id "TCONS_00028830"; exon_number "11"; oId "CUFF.30253.4"; tss_id "TSS21813"; |
| chr15 | Cufflinks exon | 25320882 | 25321013 | . | + | . | gene_id "XLOC_017287"; transcript_id "TCONS_00028830"; exon_number "12"; oId "CUFF.30253.4"; tss_id "TSS21813"; |
| chr15 | Cufflinks exon | 25322004 | 25322137 | . | + | . | gene_id "XLOC_017287"; transcript_id "TCONS_00028830"; exon_number "13"; oId "CUFF.30253.4"; tss_id "TSS21813"; |
| chr15 | Cufflinks exon | 25324009 | 25324142 | . | + | . | gene_id "XLOC_017287"; transcript_id "TCONS_00028830"; exon_number "14"; oId "CUFF.30253.4"; tss_id "TSS21813"; |
| chr15 | Cufflinks exon | 25326238 | 25326371 | . | + | . | gene_id "XLOC_017287"; transcript_id "TCONS_00028830"; exon_number "15"; oId "CUFF.30253.4"; tss_id "TSS21813"; |
| chr15 | Cufflinks exon | 25327736 | 25327852 | . | + | . | gene_id "XLOC_017287"; transcript_id "TCONS_00028830"; exon_number "16"; oId "CUFF.30253.4"; tss_id "TSS21813"; |
| chr15 | Cufflinks exon | 25328543 | 25328674 | . | + | . | gene_id "XLOC_017287"; transcript_id "TCONS_00028830"; exon_number "17"; oId "CUFF.30253.4"; tss_id "TSS21813"; |
| chr15 | Cufflinks exon | 25330337 | 25330469 | . | + | . | gene_id "XLOC_017287"; transcript_id "TCONS_00028830"; exon_number "18"; oId "CUFF.30253.4"; tss_id "TSS21813"; |
| chr15 | Cufflinks exon | 25332614 | 25332746 | . | + | . | gene_id "XLOC_017287"; transcript_id "TCONS_00028830"; exon_number "19"; oId "CUFF.30253.4"; tss_id "TSS21813"; |
| chr15 | Cufflinks exon | 25334903 | 25335013 | . | + | . | gene_id "XLOC_017287"; transcript_id "TCONS_00028830"; exon_number "20"; oId "CUFF.30253.4"; tss_id "TSS21813"; |
| chr15 | Cufflinks exon | 25336737 | 25336866 | . | + | . | gene_id "XLOC_017287"; transcript_id "TCONS_00028830"; exon_number "21"; oId "CUFF.30253.4"; tss_id "TSS21813"; |
| chr15 | Cufflinks exon | 25338981 | 25339121 | . | + | . | gene_id "XLOC_017287"; transcript_id "TCONS_00028830"; exon_number "22"; oId "CUFF.30253.4"; tss_id "TSS21813"; |
| chr15 | Cufflinks exon | 25340774 | 25340975 | . | + | . | gene_id "XLOC_017287"; transcript_id "TCONS_00028830"; exon_number "23"; oId "CUFF.30253.4"; tss_id "TSS21813"; |
| chr15 | Cufflinks exon | 25342468 | 25342586 | . | + | . | gene_id "XLOC_017287"; transcript_id "TCONS_00028830"; exon_number "24"; oId "CUFF.30253.4"; tss_id "TSS21813"; |
| chr15 | Cufflinks exon | 25343864 | 25343975 | . | + | . | gene_id "XLOC_017287"; transcript_id "TCONS_00028830"; exon_number "25"; oId "CUFF.30253.4"; tss_id "TSS21813"; |
| chr15 | Cufflinks exon | 25344292 | 25344425 | . | + | . | gene_id "XLOC_017287"; transcript_id "TCONS_00028830"; exon_number "26"; oId "CUFF.30253.4"; tss_id "TSS21813"; |
| chr15 | Cufflinks exon | 25349006 | 25349117 | . | + | . | gene_id "XLOC_017287"; transcript_id "TCONS_00028830"; exon_number "27"; oId "CUFF.30253.4"; tss_id "TSS21813"; |
| chr15 | Cufflinks exon | 25351311 | 25351441 | . | + | . | gene_id "XLOC_017287"; transcript_id "TCONS_00028830"; exon_number "28"; oId "CUFF.30253.4"; tss_id "TSS21813"; |
| chr15 | Cufflinks exon | 25352619 | 25352735 | . | + | . | gene_id "XLOC_017287"; transcript_id "TCONS_00028830"; exon_number "29"; oId "CUFF.30253.4"; tss_id "TSS21813"; |
| chr15 | Cufflinks exon | 25353057 | 25353185 | . | + | . | gene_id "XLOC_017287"; transcript_id "TCONS_00028830"; exon_number "30"; oId "CUFF.30253.4"; tss_id "TSS21813"; |
| chr15 | Cufflinks exon | 25354145 | 25354246 | . | + | . | gene_id "XLOC_017287"; transcript_id "TCONS_00028830"; exon_number                                              |

|                                              |   |   |   |                                                                    |  |
|----------------------------------------------|---|---|---|--------------------------------------------------------------------|--|
| "31"; oId "CUFF.30253.4"; tss_id "TSS21813"; |   |   |   |                                                                    |  |
| chr15 Cufflinks exon25354345 25354550        | . | + | . | gene_id "XLOC_017287"; transcript_id "TCONS_00028830"; exon_number |  |
| "32"; oId "CUFF.30253.4"; tss_id "TSS21813"; |   |   |   |                                                                    |  |
| chr15 Cufflinks exon25354702 25354862        | . | + | . | gene_id "XLOC_017287"; transcript_id "TCONS_00028830"; exon_number |  |
| "33"; oId "CUFF.30253.4"; tss_id "TSS21813"; |   |   |   |                                                                    |  |
| chr15 Cufflinks exon25356912 25357041        | . | + | . | gene_id "XLOC_017287"; transcript_id "TCONS_00028830"; exon_number |  |
| "34"; oId "CUFF.30253.4"; tss_id "TSS21813"; |   |   |   |                                                                    |  |
| chr15 Cufflinks exon25360446 25360803        | . | + | . | gene_id "XLOC_017287"; transcript_id "TCONS_00028830"; exon_number |  |
| "35"; oId "CUFF.30253.4"; tss_id "TSS21813"; |   |   |   |                                                                    |  |
| chr15 Cufflinks exon25362557 25362662        | . | + | . | gene_id "XLOC_017287"; transcript_id "TCONS_00028830"; exon_number |  |
| "36"; oId "CUFF.30253.4"; tss_id "TSS21813"; |   |   |   |                                                                    |  |
| chr15 Cufflinks exon25363415 25363529        | . | + | . | gene_id "XLOC_017287"; transcript_id "TCONS_00028830"; exon_number |  |
| "37"; oId "CUFF.30253.4"; tss_id "TSS21813"; |   |   |   |                                                                    |  |
| chr15 Cufflinks exon25364212 25367623        | . | + | . | gene_id "XLOC_017287"; transcript_id "TCONS_00028830"; exon_number |  |
| "38"; oId "CUFF.30253.4"; tss_id "TSS21813"; |   |   |   |                                                                    |  |
| chr15 Cufflinks exon25287955 25288057        | . | + | . | gene_id "XLOC_017287"; transcript_id "TCONS_00028831"; exon_number |  |
| "1"; oId "CUFF.30253.5"; tss_id "TSS21814";  |   |   |   |                                                                    |  |
| chr15 Cufflinks exon25298975 25299114        | . | + | . | gene_id "XLOC_017287"; transcript_id "TCONS_00028831"; exon_number |  |
| "2"; oId "CUFF.30253.5"; tss_id "TSS21814";  |   |   |   |                                                                    |  |
| chr15 Cufflinks exon25301630 25301769        | . | + | . | gene_id "XLOC_017287"; transcript_id "TCONS_00028831"; exon_number |  |
| "3"; oId "CUFF.30253.5"; tss_id "TSS21814";  |   |   |   |                                                                    |  |
| chr15 Cufflinks exon25304302 25304441        | . | + | . | gene_id "XLOC_017287"; transcript_id "TCONS_00028831"; exon_number |  |
| "4"; oId "CUFF.30253.5"; tss_id "TSS21814";  |   |   |   |                                                                    |  |
| chr15 Cufflinks exon25304604 25304865        | . | + | . | gene_id "XLOC_017287"; transcript_id "TCONS_00028831"; exon_number |  |
| "5"; oId "CUFF.30253.5"; tss_id "TSS21814";  |   |   |   |                                                                    |  |
| chr15 Cufflinks exon25306453 25306560        | . | + | . | gene_id "XLOC_017287"; transcript_id "TCONS_00028831"; exon_number |  |
| "6"; oId "CUFF.30253.5"; tss_id "TSS21814";  |   |   |   |                                                                    |  |
| chr15 Cufflinks exon25307097 25307235        | . | + | . | gene_id "XLOC_017287"; transcript_id "TCONS_00028831"; exon_number |  |
| "7"; oId "CUFF.30253.5"; tss_id "TSS21814";  |   |   |   |                                                                    |  |
| chr15 Cufflinks exon25309862 25310002        | . | + | . | gene_id "XLOC_017287"; transcript_id "TCONS_00028831"; exon_number |  |
| "8"; oId "CUFF.30253.5"; tss_id "TSS21814";  |   |   |   |                                                                    |  |
| chr15 Cufflinks exon25312556 25312678        | . | + | . | gene_id "XLOC_017287"; transcript_id "TCONS_00028831"; exon_number |  |
| "9"; oId "CUFF.30253.5"; tss_id "TSS21814";  |   |   |   |                                                                    |  |
| chr15 Cufflinks exon25315267 25315406        | . | + | . | gene_id "XLOC_017287"; transcript_id "TCONS_00028831"; exon_number |  |
| "10"; oId "CUFF.30253.5"; tss_id "TSS21814"; |   |   |   |                                                                    |  |
| chr15 Cufflinks exon25317872 25318010        | . | + | . | gene_id "XLOC_017287"; transcript_id "TCONS_00028831"; exon_number |  |
| "11"; oId "CUFF.30253.5"; tss_id "TSS21814"; |   |   |   |                                                                    |  |
| chr15 Cufflinks exon25319039 25319198        | . | + | . | gene_id "XLOC_017287"; transcript_id "TCONS_00028831"; exon_number |  |
| "12"; oId "CUFF.30253.5"; tss_id "TSS21814"; |   |   |   |                                                                    |  |
| chr15 Cufflinks exon25320882 25321013        | . | + | . | gene_id "XLOC_017287"; transcript_id "TCONS_00028831"; exon_number |  |
| "13"; oId "CUFF.30253.5"; tss_id "TSS21814"; |   |   |   |                                                                    |  |
| chr15 Cufflinks exon25322004 25322137        | . | + | . | gene_id "XLOC_017287"; transcript_id "TCONS_00028831"; exon_number |  |
| "14"; oId "CUFF.30253.5"; tss_id "TSS21814"; |   |   |   |                                                                    |  |



|       |                |          |          |   |   |   |                                                                                                                 |
|-------|----------------|----------|----------|---|---|---|-----------------------------------------------------------------------------------------------------------------|
| chr15 | Cufflinks exon | 25324009 | 25324142 | . | + | . | gene_id "XLOC_017287"; transcript_id "TCONS_00028831"; exon_number "15"; oId "CUFF.30253.5"; tss_id "TSS21814"; |
| chr15 | Cufflinks exon | 25325272 | 25325376 | . | + | . | gene_id "XLOC_017287"; transcript_id "TCONS_00028831"; exon_number "16"; oId "CUFF.30253.5"; tss_id "TSS21814"; |
| chr15 | Cufflinks exon | 25326238 | 25326330 | . | + | . | gene_id "XLOC_017287"; transcript_id "TCONS_00028831"; exon_number "17"; oId "CUFF.30253.5"; tss_id "TSS21814"; |
| chr15 | Cufflinks exon | 25327794 | 25327852 | . | + | . | gene_id "XLOC_017287"; transcript_id "TCONS_00028831"; exon_number "18"; oId "CUFF.30253.5"; tss_id "TSS21814"; |
| chr15 | Cufflinks exon | 25328543 | 25328674 | . | + | . | gene_id "XLOC_017287"; transcript_id "TCONS_00028831"; exon_number "19"; oId "CUFF.30253.5"; tss_id "TSS21814"; |
| chr15 | Cufflinks exon | 25332614 | 25332746 | . | + | . | gene_id "XLOC_017287"; transcript_id "TCONS_00028831"; exon_number "20"; oId "CUFF.30253.5"; tss_id "TSS21814"; |
| chr15 | Cufflinks exon | 25333755 | 25333888 | . | + | . | gene_id "XLOC_017287"; transcript_id "TCONS_00028831"; exon_number "21"; oId "CUFF.30253.5"; tss_id "TSS21814"; |
| chr15 | Cufflinks exon | 25334761 | 25335013 | . | + | . | gene_id "XLOC_017287"; transcript_id "TCONS_00028831"; exon_number "22"; oId "CUFF.30253.5"; tss_id "TSS21814"; |
| chr15 | Cufflinks exon | 25336737 | 25336866 | . | + | . | gene_id "XLOC_017287"; transcript_id "TCONS_00028831"; exon_number "23"; oId "CUFF.30253.5"; tss_id "TSS21814"; |
| chr15 | Cufflinks exon | 25338981 | 25339121 | . | + | . | gene_id "XLOC_017287"; transcript_id "TCONS_00028831"; exon_number "24"; oId "CUFF.30253.5"; tss_id "TSS21814"; |
| chr15 | Cufflinks exon | 25340774 | 25340975 | . | + | . | gene_id "XLOC_017287"; transcript_id "TCONS_00028831"; exon_number "25"; oId "CUFF.30253.5"; tss_id "TSS21814"; |
| chr15 | Cufflinks exon | 25342468 | 25342586 | . | + | . | gene_id "XLOC_017287"; transcript_id "TCONS_00028831"; exon_number "26"; oId "CUFF.30253.5"; tss_id "TSS21814"; |
| chr15 | Cufflinks exon | 25343864 | 25343975 | . | + | . | gene_id "XLOC_017287"; transcript_id "TCONS_00028831"; exon_number "27"; oId "CUFF.30253.5"; tss_id "TSS21814"; |
| chr15 | Cufflinks exon | 25344292 | 25344425 | . | + | . | gene_id "XLOC_017287"; transcript_id "TCONS_00028831"; exon_number "28"; oId "CUFF.30253.5"; tss_id "TSS21814"; |
| chr15 | Cufflinks exon | 25349006 | 25349118 | . | + | . | gene_id "XLOC_017287"; transcript_id "TCONS_00028831"; exon_number "29"; oId "CUFF.30253.5"; tss_id "TSS21814"; |
| chr15 | Cufflinks exon | 25351312 | 25351441 | . | + | . | gene_id "XLOC_017287"; transcript_id "TCONS_00028831"; exon_number "30"; oId "CUFF.30253.5"; tss_id "TSS21814"; |
| chr15 | Cufflinks exon | 25352619 | 25352735 | . | + | . | gene_id "XLOC_017287"; transcript_id "TCONS_00028831"; exon_number "31"; oId "CUFF.30253.5"; tss_id "TSS21814"; |
| chr15 | Cufflinks exon | 25353057 | 25353185 | . | + | . | gene_id "XLOC_017287"; transcript_id "TCONS_00028831"; exon_number "32"; oId "CUFF.30253.5"; tss_id "TSS21814"; |
| chr15 | Cufflinks exon | 25354145 | 25354250 | . | + | . | gene_id "XLOC_017287"; transcript_id "TCONS_00028831"; exon_number "33"; oId "CUFF.30253.5"; tss_id "TSS21814"; |
| chr15 | Cufflinks exon | 25354345 | 25354550 | . | + | . | gene_id "XLOC_017287"; transcript_id "TCONS_00028831"; exon_number "34"; oId "CUFF.30253.5"; tss_id "TSS21814"; |
| chr15 | Cufflinks exon | 25354702 | 25354862 | . | + | . | gene_id "XLOC_017287"; transcript_id "TCONS_00028831"; exon_number "35"; oId "CUFF.30253.5"; tss_id "TSS21814"; |
| chr15 | Cufflinks exon | 25356912 | 25357041 | . | + | . | gene_id "XLOC_017287"; transcript_id "TCONS_00028831"; exon_number                                              |

"36"; oId "CUFF.30253.5"; tss\_id "TSS21814";  
chr15 Cufflinks exon25360446 25360803 . + . gene\_id "XLOC\_017287"; transcript\_id "TCONS\_00028831"; exon\_number  
"37"; oId "CUFF.30253.5"; tss\_id "TSS21814";  
chr15 Cufflinks exon25362557 25362662 . + . gene\_id "XLOC\_017287"; transcript\_id "TCONS\_00028831"; exon\_number  
"38"; oId "CUFF.30253.5"; tss\_id "TSS21814";  
chr15 Cufflinks exon25363415 25363529 . + . gene\_id "XLOC\_017287"; transcript\_id "TCONS\_00028831"; exon\_number  
"39"; oId "CUFF.30253.5"; tss\_id "TSS21814";  
chr15 Cufflinks exon25364212 25367623 . + . gene\_id "XLOC\_017287"; transcript\_id "TCONS\_00028831"; exon\_number  
"40"; oId "CUFF.30253.5"; tss\_id "TSS21814";  
chr15 Cufflinks exon25296984 25297287 . + . gene\_id "XLOC\_017287"; transcript\_id "TCONS\_00028834"; exon\_number  
"1"; oId "CUFF.30253.8"; tss\_id "TSS21817";  
chr15 Cufflinks exon25298413 25298510 . + . gene\_id "XLOC\_017287"; transcript\_id "TCONS\_00028834"; exon\_number  
"2"; oId "CUFF.30253.8"; tss\_id "TSS21817";  
chr15 Cufflinks exon25298975 25299114 . + . gene\_id "XLOC\_017287"; transcript\_id "TCONS\_00028834"; exon\_number  
"3"; oId "CUFF.30253.8"; tss\_id "TSS21817";  
chr15 Cufflinks exon25301630 25301769 . + . gene\_id "XLOC\_017287"; transcript\_id "TCONS\_00028834"; exon\_number  
"4"; oId "CUFF.30253.8"; tss\_id "TSS21817";  
chr15 Cufflinks exon25304302 25304441 . + . gene\_id "XLOC\_017287"; transcript\_id "TCONS\_00028834"; exon\_number  
"5"; oId "CUFF.30253.8"; tss\_id "TSS21817";  
chr15 Cufflinks exon25304604 25304865 . + . gene\_id "XLOC\_017287"; transcript\_id "TCONS\_00028834"; exon\_number  
"6"; oId "CUFF.30253.8"; tss\_id "TSS21817";  
chr15 Cufflinks exon25306453 25306560 . + . gene\_id "XLOC\_017287"; transcript\_id "TCONS\_00028834"; exon\_number  
"7"; oId "CUFF.30253.8"; tss\_id "TSS21817";  
chr15 Cufflinks exon25307097 25307235 . + . gene\_id "XLOC\_017287"; transcript\_id "TCONS\_00028834"; exon\_number  
"8"; oId "CUFF.30253.8"; tss\_id "TSS21817";  
chr15 Cufflinks exon25309862 25310002 . + . gene\_id "XLOC\_017287"; transcript\_id "TCONS\_00028834"; exon\_number  
"9"; oId "CUFF.30253.8"; tss\_id "TSS21817";  
chr15 Cufflinks exon25315267 25315406 . + . gene\_id "XLOC\_017287"; transcript\_id "TCONS\_00028834"; exon\_number  
"10"; oId "CUFF.30253.8"; tss\_id "TSS21817";  
chr15 Cufflinks exon25317872 25318010 . + . gene\_id "XLOC\_017287"; transcript\_id "TCONS\_00028834"; exon\_number  
"11"; oId "CUFF.30253.8"; tss\_id "TSS21817";  
chr15 Cufflinks exon25319039 25319198 . + . gene\_id "XLOC\_017287"; transcript\_id "TCONS\_00028834"; exon\_number  
"12"; oId "CUFF.30253.8"; tss\_id "TSS21817";  
chr15 Cufflinks exon25320882 25321013 . + . gene\_id "XLOC\_017287"; transcript\_id "TCONS\_00028834"; exon\_number  
"13"; oId "CUFF.30253.8"; tss\_id "TSS21817";  
chr15 Cufflinks exon25322004 25322137 . + . gene\_id "XLOC\_017287"; transcript\_id "TCONS\_00028834"; exon\_number  
"14"; oId "CUFF.30253.8"; tss\_id "TSS21817";  
chr15 Cufflinks exon25324009 25324142 . + . gene\_id "XLOC\_017287"; transcript\_id "TCONS\_00028834"; exon\_number  
"15"; oId "CUFF.30253.8"; tss\_id "TSS21817";  
chr15 Cufflinks exon25326238 25326371 . + . gene\_id "XLOC\_017287"; transcript\_id "TCONS\_00028834"; exon\_number  
"16"; oId "CUFF.30253.8"; tss\_id "TSS21817";  
chr15 Cufflinks exon25327736 25327852 . + . gene\_id "XLOC\_017287"; transcript\_id "TCONS\_00028834"; exon\_number  
"17"; oId "CUFF.30253.8"; tss\_id "TSS21817";

|       |                |          |          |   |   |   |                                                                                                                 |
|-------|----------------|----------|----------|---|---|---|-----------------------------------------------------------------------------------------------------------------|
| chr15 | Cufflinks exon | 25328543 | 25328674 | . | + | . | gene_id "XLOC_017287"; transcript_id "TCONS_00028834"; exon_number "18"; oId "CUFF.30253.8"; tss_id "TSS21817"; |
| chr15 | Cufflinks exon | 25330337 | 25330469 | . | + | . | gene_id "XLOC_017287"; transcript_id "TCONS_00028834"; exon_number "19"; oId "CUFF.30253.8"; tss_id "TSS21817"; |
| chr15 | Cufflinks exon | 25332614 | 25332746 | . | + | . | gene_id "XLOC_017287"; transcript_id "TCONS_00028834"; exon_number "20"; oId "CUFF.30253.8"; tss_id "TSS21817"; |
| chr15 | Cufflinks exon | 25334761 | 25335013 | . | + | . | gene_id "XLOC_017287"; transcript_id "TCONS_00028834"; exon_number "21"; oId "CUFF.30253.8"; tss_id "TSS21817"; |
| chr15 | Cufflinks exon | 25336737 | 25336866 | . | + | . | gene_id "XLOC_017287"; transcript_id "TCONS_00028834"; exon_number "22"; oId "CUFF.30253.8"; tss_id "TSS21817"; |
| chr15 | Cufflinks exon | 25338981 | 25339121 | . | + | . | gene_id "XLOC_017287"; transcript_id "TCONS_00028834"; exon_number "23"; oId "CUFF.30253.8"; tss_id "TSS21817"; |
| chr15 | Cufflinks exon | 25340774 | 25340975 | . | + | . | gene_id "XLOC_017287"; transcript_id "TCONS_00028834"; exon_number "24"; oId "CUFF.30253.8"; tss_id "TSS21817"; |
| chr15 | Cufflinks exon | 25342468 | 25342586 | . | + | . | gene_id "XLOC_017287"; transcript_id "TCONS_00028834"; exon_number "25"; oId "CUFF.30253.8"; tss_id "TSS21817"; |
| chr15 | Cufflinks exon | 25343864 | 25343975 | . | + | . | gene_id "XLOC_017287"; transcript_id "TCONS_00028834"; exon_number "26"; oId "CUFF.30253.8"; tss_id "TSS21817"; |
| chr15 | Cufflinks exon | 25344292 | 25344425 | . | + | . | gene_id "XLOC_017287"; transcript_id "TCONS_00028834"; exon_number "27"; oId "CUFF.30253.8"; tss_id "TSS21817"; |
| chr15 | Cufflinks exon | 25349006 | 25349117 | . | + | . | gene_id "XLOC_017287"; transcript_id "TCONS_00028834"; exon_number "28"; oId "CUFF.30253.8"; tss_id "TSS21817"; |
| chr15 | Cufflinks exon | 25351311 | 25351441 | . | + | . | gene_id "XLOC_017287"; transcript_id "TCONS_00028834"; exon_number "29"; oId "CUFF.30253.8"; tss_id "TSS21817"; |
| chr15 | Cufflinks exon | 25352619 | 25352735 | . | + | . | gene_id "XLOC_017287"; transcript_id "TCONS_00028834"; exon_number "30"; oId "CUFF.30253.8"; tss_id "TSS21817"; |
| chr15 | Cufflinks exon | 25353057 | 25353185 | . | + | . | gene_id "XLOC_017287"; transcript_id "TCONS_00028834"; exon_number "31"; oId "CUFF.30253.8"; tss_id "TSS21817"; |
| chr15 | Cufflinks exon | 25354145 | 25354250 | . | + | . | gene_id "XLOC_017287"; transcript_id "TCONS_00028834"; exon_number "32"; oId "CUFF.30253.8"; tss_id "TSS21817"; |
| chr15 | Cufflinks exon | 25354345 | 25354550 | . | + | . | gene_id "XLOC_017287"; transcript_id "TCONS_00028834"; exon_number "33"; oId "CUFF.30253.8"; tss_id "TSS21817"; |
| chr15 | Cufflinks exon | 25354702 | 25354862 | . | + | . | gene_id "XLOC_017287"; transcript_id "TCONS_00028834"; exon_number "34"; oId "CUFF.30253.8"; tss_id "TSS21817"; |
| chr15 | Cufflinks exon | 25356912 | 25357041 | . | + | . | gene_id "XLOC_017287"; transcript_id "TCONS_00028834"; exon_number "35"; oId "CUFF.30253.8"; tss_id "TSS21817"; |
| chr15 | Cufflinks exon | 25360446 | 25360803 | . | + | . | gene_id "XLOC_017287"; transcript_id "TCONS_00028834"; exon_number "36"; oId "CUFF.30253.8"; tss_id "TSS21817"; |
| chr15 | Cufflinks exon | 25362557 | 25362662 | . | + | . | gene_id "XLOC_017287"; transcript_id "TCONS_00028834"; exon_number "37"; oId "CUFF.30253.8"; tss_id "TSS21817"; |
| chr15 | Cufflinks exon | 25363415 | 25363529 | . | + | . | gene_id "XLOC_017287"; transcript_id "TCONS_00028834"; exon_number "38"; oId "CUFF.30253.8"; tss_id "TSS21817"; |
| chr15 | Cufflinks exon | 25364212 | 25367623 | . | + | . | gene_id "XLOC_017287"; transcript_id "TCONS_00028834"; exon_number "39"; oId "CUFF.30253.8"; tss_id "TSS21817"; |

"39"; oId "CUFF.30253.8"; tss\_id "TSS21817";  
chr15 Cufflinks exon25302017 25302097 . + . gene\_id "XLOC\_017287"; transcript\_id "TCONS\_00028835"; exon\_number  
"1"; oId "CUFF.30253.9"; tss\_id "TSS21818";  
chr15 Cufflinks exon25307571 25307708 . + . gene\_id "XLOC\_017287"; transcript\_id "TCONS\_00028835"; exon\_number  
"2"; oId "CUFF.30253.9"; tss\_id "TSS21818";  
chr15 Cufflinks exon25309862 25310002 . + . gene\_id "XLOC\_017287"; transcript\_id "TCONS\_00028835"; exon\_number  
"3"; oId "CUFF.30253.9"; tss\_id "TSS21818";  
chr15 Cufflinks exon25312559 25312678 . + . gene\_id "XLOC\_017287"; transcript\_id "TCONS\_00028835"; exon\_number  
"4"; oId "CUFF.30253.9"; tss\_id "TSS21818";  
chr15 Cufflinks exon25315267 25315406 . + . gene\_id "XLOC\_017287"; transcript\_id "TCONS\_00028835"; exon\_number  
"5"; oId "CUFF.30253.9"; tss\_id "TSS21818";  
chr15 Cufflinks exon25317872 25318010 . + . gene\_id "XLOC\_017287"; transcript\_id "TCONS\_00028835"; exon\_number  
"6"; oId "CUFF.30253.9"; tss\_id "TSS21818";  
chr15 Cufflinks exon25319039 25319198 . + . gene\_id "XLOC\_017287"; transcript\_id "TCONS\_00028835"; exon\_number  
"7"; oId "CUFF.30253.9"; tss\_id "TSS21818";  
chr15 Cufflinks exon25320882 25321013 . + . gene\_id "XLOC\_017287"; transcript\_id "TCONS\_00028835"; exon\_number  
"8"; oId "CUFF.30253.9"; tss\_id "TSS21818";  
chr15 Cufflinks exon25322004 25322137 . + . gene\_id "XLOC\_017287"; transcript\_id "TCONS\_00028835"; exon\_number  
"9"; oId "CUFF.30253.9"; tss\_id "TSS21818";  
chr15 Cufflinks exon25324009 25324142 . + . gene\_id "XLOC\_017287"; transcript\_id "TCONS\_00028835"; exon\_number  
"10"; oId "CUFF.30253.9"; tss\_id "TSS21818";  
chr15 Cufflinks exon25324973 25325226 . + . gene\_id "XLOC\_017287"; transcript\_id "TCONS\_00028835"; exon\_number  
"11"; oId "CUFF.30253.9"; tss\_id "TSS21818";  
chr15 Cufflinks exon25326238 25326371 . + . gene\_id "XLOC\_017287"; transcript\_id "TCONS\_00028835"; exon\_number  
"12"; oId "CUFF.30253.9"; tss\_id "TSS21818";  
chr15 Cufflinks exon25327736 25327852 . + . gene\_id "XLOC\_017287"; transcript\_id "TCONS\_00028835"; exon\_number  
"13"; oId "CUFF.30253.9"; tss\_id "TSS21818";  
chr15 Cufflinks exon25328543 25328674 . + . gene\_id "XLOC\_017287"; transcript\_id "TCONS\_00028835"; exon\_number  
"14"; oId "CUFF.30253.9"; tss\_id "TSS21818";  
chr15 Cufflinks exon25330337 25330469 . + . gene\_id "XLOC\_017287"; transcript\_id "TCONS\_00028835"; exon\_number  
"15"; oId "CUFF.30253.9"; tss\_id "TSS21818";  
chr15 Cufflinks exon25332614 25332746 . + . gene\_id "XLOC\_017287"; transcript\_id "TCONS\_00028835"; exon\_number  
"16"; oId "CUFF.30253.9"; tss\_id "TSS21818";  
chr15 Cufflinks exon25335059 25335157 . + . gene\_id "XLOC\_017287"; transcript\_id "TCONS\_00028835"; exon\_number  
"17"; oId "CUFF.30253.9"; tss\_id "TSS21818";  
chr15 Cufflinks exon25336737 25336866 . + . gene\_id "XLOC\_017287"; transcript\_id "TCONS\_00028835"; exon\_number  
"18"; oId "CUFF.30253.9"; tss\_id "TSS21818";  
chr15 Cufflinks exon25338981 25339121 . + . gene\_id "XLOC\_017287"; transcript\_id "TCONS\_00028835"; exon\_number  
"19"; oId "CUFF.30253.9"; tss\_id "TSS21818";  
chr15 Cufflinks exon25340774 25340975 . + . gene\_id "XLOC\_017287"; transcript\_id "TCONS\_00028835"; exon\_number  
"20"; oId "CUFF.30253.9"; tss\_id "TSS21818";  
chr15 Cufflinks exon25342468 25342586 . + . gene\_id "XLOC\_017287"; transcript\_id "TCONS\_00028835"; exon\_number  
"21"; oId "CUFF.30253.9"; tss\_id "TSS21818";

|       |                |          |          |   |   |   |                                                                                                                 |
|-------|----------------|----------|----------|---|---|---|-----------------------------------------------------------------------------------------------------------------|
| chr15 | Cufflinks exon | 25343864 | 25343975 | . | + | . | gene_id "XLOC_017287"; transcript_id "TCONS_00028835"; exon_number "22"; oId "CUFF.30253.9"; tss_id "TSS21818"; |
| chr15 | Cufflinks exon | 25344292 | 25344425 | . | + | . | gene_id "XLOC_017287"; transcript_id "TCONS_00028835"; exon_number "23"; oId "CUFF.30253.9"; tss_id "TSS21818"; |
| chr15 | Cufflinks exon | 25349006 | 25349117 | . | + | . | gene_id "XLOC_017287"; transcript_id "TCONS_00028835"; exon_number "24"; oId "CUFF.30253.9"; tss_id "TSS21818"; |
| chr15 | Cufflinks exon | 25351368 | 25351441 | . | + | . | gene_id "XLOC_017287"; transcript_id "TCONS_00028835"; exon_number "25"; oId "CUFF.30253.9"; tss_id "TSS21818"; |
| chr15 | Cufflinks exon | 25352619 | 25352735 | . | + | . | gene_id "XLOC_017287"; transcript_id "TCONS_00028835"; exon_number "26"; oId "CUFF.30253.9"; tss_id "TSS21818"; |
| chr15 | Cufflinks exon | 25353057 | 25353185 | . | + | . | gene_id "XLOC_017287"; transcript_id "TCONS_00028835"; exon_number "27"; oId "CUFF.30253.9"; tss_id "TSS21818"; |
| chr15 | Cufflinks exon | 25354145 | 25354250 | . | + | . | gene_id "XLOC_017287"; transcript_id "TCONS_00028835"; exon_number "28"; oId "CUFF.30253.9"; tss_id "TSS21818"; |
| chr15 | Cufflinks exon | 25354345 | 25354550 | . | + | . | gene_id "XLOC_017287"; transcript_id "TCONS_00028835"; exon_number "29"; oId "CUFF.30253.9"; tss_id "TSS21818"; |
| chr15 | Cufflinks exon | 25354702 | 25354862 | . | + | . | gene_id "XLOC_017287"; transcript_id "TCONS_00028835"; exon_number "30"; oId "CUFF.30253.9"; tss_id "TSS21818"; |
| chr15 | Cufflinks exon | 25356912 | 25357041 | . | + | . | gene_id "XLOC_017287"; transcript_id "TCONS_00028835"; exon_number "31"; oId "CUFF.30253.9"; tss_id "TSS21818"; |
| chr15 | Cufflinks exon | 25360446 | 25360803 | . | + | . | gene_id "XLOC_017287"; transcript_id "TCONS_00028835"; exon_number "32"; oId "CUFF.30253.9"; tss_id "TSS21818"; |
| chr15 | Cufflinks exon | 25362557 | 25362662 | . | + | . | gene_id "XLOC_017287"; transcript_id "TCONS_00028835"; exon_number "33"; oId "CUFF.30253.9"; tss_id "TSS21818"; |
| chr15 | Cufflinks exon | 25363418 | 25363529 | . | + | . | gene_id "XLOC_017287"; transcript_id "TCONS_00028835"; exon_number "34"; oId "CUFF.30253.9"; tss_id "TSS21818"; |
| chr15 | Cufflinks exon | 25364212 | 25367623 | . | + | . | gene_id "XLOC_017287"; transcript_id "TCONS_00028835"; exon_number "35"; oId "CUFF.30253.9"; tss_id "TSS21818"; |
| chr15 | Cufflinks exon | 25324973 | 25325226 | . | + | . | gene_id "XLOC_017287"; transcript_id "TCONS_00028839"; exon_number "1"; oId "CUFF.30253.12"; tss_id "TSS21821"; |
| chr15 | Cufflinks exon | 25326238 | 25326371 | . | + | . | gene_id "XLOC_017287"; transcript_id "TCONS_00028839"; exon_number "2"; oId "CUFF.30253.12"; tss_id "TSS21821"; |
| chr15 | Cufflinks exon | 25327736 | 25327852 | . | + | . | gene_id "XLOC_017287"; transcript_id "TCONS_00028839"; exon_number "3"; oId "CUFF.30253.12"; tss_id "TSS21821"; |
| chr15 | Cufflinks exon | 25328543 | 25328674 | . | + | . | gene_id "XLOC_017287"; transcript_id "TCONS_00028839"; exon_number "4"; oId "CUFF.30253.12"; tss_id "TSS21821"; |
| chr15 | Cufflinks exon | 25330337 | 25330469 | . | + | . | gene_id "XLOC_017287"; transcript_id "TCONS_00028839"; exon_number "5"; oId "CUFF.30253.12"; tss_id "TSS21821"; |
| chr15 | Cufflinks exon | 25332614 | 25332746 | . | + | . | gene_id "XLOC_017287"; transcript_id "TCONS_00028839"; exon_number "6"; oId "CUFF.30253.12"; tss_id "TSS21821"; |
| chr15 | Cufflinks exon | 25334761 | 25335013 | . | + | . | gene_id "XLOC_017287"; transcript_id "TCONS_00028839"; exon_number "7"; oId "CUFF.30253.12"; tss_id "TSS21821"; |
| chr15 | Cufflinks exon | 25336737 | 25336866 | . | + | . | gene_id "XLOC_017287"; transcript_id "TCONS_00028839"; exon_number                                              |

"8"; oId "CUFF.30253.12"; tss\_id "TSS21821";  
chr15 Cufflinks exon25338981 25339121 . + . gene\_id "XLOC\_017287"; transcript\_id "TCONS\_00028839"; exon\_number  
"9"; oId "CUFF.30253.12"; tss\_id "TSS21821";  
chr15 Cufflinks exon25342468 25342586 . + . gene\_id "XLOC\_017287"; transcript\_id "TCONS\_00028839"; exon\_number  
"10"; oId "CUFF.30253.12"; tss\_id "TSS21821";  
chr15 Cufflinks exon25343864 25343975 . + . gene\_id "XLOC\_017287"; transcript\_id "TCONS\_00028839"; exon\_number  
"11"; oId "CUFF.30253.12"; tss\_id "TSS21821";  
chr15 Cufflinks exon25344292 25344425 . + . gene\_id "XLOC\_017287"; transcript\_id "TCONS\_00028839"; exon\_number  
"12"; oId "CUFF.30253.12"; tss\_id "TSS21821";  
chr15 Cufflinks exon25349006 25349117 . + . gene\_id "XLOC\_017287"; transcript\_id "TCONS\_00028839"; exon\_number  
"13"; oId "CUFF.30253.12"; tss\_id "TSS21821";  
chr15 Cufflinks exon25351311 25351441 . + . gene\_id "XLOC\_017287"; transcript\_id "TCONS\_00028839"; exon\_number  
"14"; oId "CUFF.30253.12"; tss\_id "TSS21821";  
chr15 Cufflinks exon25352619 25352735 . + . gene\_id "XLOC\_017287"; transcript\_id "TCONS\_00028839"; exon\_number  
"15"; oId "CUFF.30253.12"; tss\_id "TSS21821";  
chr15 Cufflinks exon25353057 25353185 . + . gene\_id "XLOC\_017287"; transcript\_id "TCONS\_00028839"; exon\_number  
"16"; oId "CUFF.30253.12"; tss\_id "TSS21821";  
chr15 Cufflinks exon25354145 25354250 . + . gene\_id "XLOC\_017287"; transcript\_id "TCONS\_00028839"; exon\_number  
"17"; oId "CUFF.30253.12"; tss\_id "TSS21821";  
chr15 Cufflinks exon25354345 25354550 . + . gene\_id "XLOC\_017287"; transcript\_id "TCONS\_00028839"; exon\_number  
"18"; oId "CUFF.30253.12"; tss\_id "TSS21821";  
chr15 Cufflinks exon25354702 25354862 . + . gene\_id "XLOC\_017287"; transcript\_id "TCONS\_00028839"; exon\_number  
"19"; oId "CUFF.30253.12"; tss\_id "TSS21821";  
chr15 Cufflinks exon25356912 25357041 . + . gene\_id "XLOC\_017287"; transcript\_id "TCONS\_00028839"; exon\_number  
"20"; oId "CUFF.30253.12"; tss\_id "TSS21821";  
chr15 Cufflinks exon25360446 25360803 . + . gene\_id "XLOC\_017287"; transcript\_id "TCONS\_00028839"; exon\_number  
"21"; oId "CUFF.30253.12"; tss\_id "TSS21821";  
chr15 Cufflinks exon25362561 25362662 . + . gene\_id "XLOC\_017287"; transcript\_id "TCONS\_00028839"; exon\_number  
"22"; oId "CUFF.30253.12"; tss\_id "TSS21821";  
chr15 Cufflinks exon25363415 25363529 . + . gene\_id "XLOC\_017287"; transcript\_id "TCONS\_00028839"; exon\_number  
"23"; oId "CUFF.30253.12"; tss\_id "TSS21821";  
chr15 Cufflinks exon25364212 25367623 . + . gene\_id "XLOC\_017287"; transcript\_id "TCONS\_00028839"; exon\_number  
"24"; oId "CUFF.30253.12"; tss\_id "TSS21821";  
chr15 Cufflinks exon25330453 25330469 . + . gene\_id "XLOC\_017287"; transcript\_id "TCONS\_00028840"; exon\_number  
"1"; oId "CUFF.30253.13"; tss\_id "TSS21822";  
chr15 Cufflinks exon25332614 25332746 . + . gene\_id "XLOC\_017287"; transcript\_id "TCONS\_00028840"; exon\_number  
"2"; oId "CUFF.30253.13"; tss\_id "TSS21822";  
chr15 Cufflinks exon25334761 25335013 . + . gene\_id "XLOC\_017287"; transcript\_id "TCONS\_00028840"; exon\_number  
"3"; oId "CUFF.30253.13"; tss\_id "TSS21822";  
chr15 Cufflinks exon25336737 25336866 . + . gene\_id "XLOC\_017287"; transcript\_id "TCONS\_00028840"; exon\_number  
"4"; oId "CUFF.30253.13"; tss\_id "TSS21822";  
chr15 Cufflinks exon25338981 25339121 . + . gene\_id "XLOC\_017287"; transcript\_id "TCONS\_00028840"; exon\_number  
"5"; oId "CUFF.30253.13"; tss\_id "TSS21822";

|                                               |                |          |          |   |   |   |                                                                    |
|-----------------------------------------------|----------------|----------|----------|---|---|---|--------------------------------------------------------------------|
| chr15                                         | Cufflinks exon | 25342468 | 25342586 | . | + | . | gene_id "XLOC_017287"; transcript_id "TCONS_00028840"; exon_number |
| "6"; oId "CUFF.30253.13"; tss_id "TSS21822";  |                |          |          |   |   |   |                                                                    |
| chr15                                         | Cufflinks exon | 25343864 | 25343975 | . | + | . | gene_id "XLOC_017287"; transcript_id "TCONS_00028840"; exon_number |
| "7"; oId "CUFF.30253.13"; tss_id "TSS21822";  |                |          |          |   |   |   |                                                                    |
| chr15                                         | Cufflinks exon | 25344292 | 25344425 | . | + | . | gene_id "XLOC_017287"; transcript_id "TCONS_00028840"; exon_number |
| "8"; oId "CUFF.30253.13"; tss_id "TSS21822";  |                |          |          |   |   |   |                                                                    |
| chr15                                         | Cufflinks exon | 25349006 | 25349117 | . | + | . | gene_id "XLOC_017287"; transcript_id "TCONS_00028840"; exon_number |
| "9"; oId "CUFF.30253.13"; tss_id "TSS21822";  |                |          |          |   |   |   |                                                                    |
| chr15                                         | Cufflinks exon | 25351311 | 25351441 | . | + | . | gene_id "XLOC_017287"; transcript_id "TCONS_00028840"; exon_number |
| "10"; oId "CUFF.30253.13"; tss_id "TSS21822"; |                |          |          |   |   |   |                                                                    |
| chr15                                         | Cufflinks exon | 25352619 | 25352735 | . | + | . | gene_id "XLOC_017287"; transcript_id "TCONS_00028840"; exon_number |
| "11"; oId "CUFF.30253.13"; tss_id "TSS21822"; |                |          |          |   |   |   |                                                                    |
| chr15                                         | Cufflinks exon | 25353057 | 25353185 | . | + | . | gene_id "XLOC_017287"; transcript_id "TCONS_00028840"; exon_number |
| "12"; oId "CUFF.30253.13"; tss_id "TSS21822"; |                |          |          |   |   |   |                                                                    |
| chr15                                         | Cufflinks exon | 25354145 | 25354250 | . | + | . | gene_id "XLOC_017287"; transcript_id "TCONS_00028840"; exon_number |
| "13"; oId "CUFF.30253.13"; tss_id "TSS21822"; |                |          |          |   |   |   |                                                                    |
| chr15                                         | Cufflinks exon | 25354345 | 25354550 | . | + | . | gene_id "XLOC_017287"; transcript_id "TCONS_00028840"; exon_number |
| "14"; oId "CUFF.30253.13"; tss_id "TSS21822"; |                |          |          |   |   |   |                                                                    |
| chr15                                         | Cufflinks exon | 25354702 | 25354862 | . | + | . | gene_id "XLOC_017287"; transcript_id "TCONS_00028840"; exon_number |
| "15"; oId "CUFF.30253.13"; tss_id "TSS21822"; |                |          |          |   |   |   |                                                                    |
| chr15                                         | Cufflinks exon | 25356912 | 25357041 | . | + | . | gene_id "XLOC_017287"; transcript_id "TCONS_00028840"; exon_number |
| "16"; oId "CUFF.30253.13"; tss_id "TSS21822"; |                |          |          |   |   |   |                                                                    |
| chr15                                         | Cufflinks exon | 25360446 | 25360803 | . | + | . | gene_id "XLOC_017287"; transcript_id "TCONS_00028840"; exon_number |
| "17"; oId "CUFF.30253.13"; tss_id "TSS21822"; |                |          |          |   |   |   |                                                                    |
| chr15                                         | Cufflinks exon | 25362557 | 25362662 | . | + | . | gene_id "XLOC_017287"; transcript_id "TCONS_00028840"; exon_number |
| "18"; oId "CUFF.30253.13"; tss_id "TSS21822"; |                |          |          |   |   |   |                                                                    |
| chr15                                         | Cufflinks exon | 25363415 | 25363529 | . | + | . | gene_id "XLOC_017287"; transcript_id "TCONS_00028840"; exon_number |
| "19"; oId "CUFF.30253.13"; tss_id "TSS21822"; |                |          |          |   |   |   |                                                                    |
| chr15                                         | Cufflinks exon | 25364212 | 25367623 | . | + | . | gene_id "XLOC_017287"; transcript_id "TCONS_00028840"; exon_number |
| "20"; oId "CUFF.30253.13"; tss_id "TSS21822"; |                |          |          |   |   |   |                                                                    |
| chr15                                         | Cufflinks exon | 25331479 | 25331611 | . | + | . | gene_id "XLOC_017287"; transcript_id "TCONS_00028841"; exon_number |
| "1"; oId "CUFF.30253.14"; tss_id "TSS21823";  |                |          |          |   |   |   |                                                                    |
| chr15                                         | Cufflinks exon | 25332614 | 25332746 | . | + | . | gene_id "XLOC_017287"; transcript_id "TCONS_00028841"; exon_number |
| "2"; oId "CUFF.30253.14"; tss_id "TSS21823";  |                |          |          |   |   |   |                                                                    |
| chr15                                         | Cufflinks exon | 25335059 | 25335157 | . | + | . | gene_id "XLOC_017287"; transcript_id "TCONS_00028841"; exon_number |
| "3"; oId "CUFF.30253.14"; tss_id "TSS21823";  |                |          |          |   |   |   |                                                                    |
| chr15                                         | Cufflinks exon | 25336737 | 25336866 | . | + | . | gene_id "XLOC_017287"; transcript_id "TCONS_00028841"; exon_number |
| "4"; oId "CUFF.30253.14"; tss_id "TSS21823";  |                |          |          |   |   |   |                                                                    |
| chr15                                         | Cufflinks exon | 25338981 | 25339121 | . | + | . | gene_id "XLOC_017287"; transcript_id "TCONS_00028841"; exon_number |
| "5"; oId "CUFF.30253.14"; tss_id "TSS21823";  |                |          |          |   |   |   |                                                                    |
| chr15                                         | Cufflinks exon | 25340774 | 25340975 | . | + | . | gene_id "XLOC_017287"; transcript_id "TCONS_00028841"; exon_number |
| "6"; oId "CUFF.30253.14"; tss_id "TSS21823";  |                |          |          |   |   |   |                                                                    |
| chr15                                         | Cufflinks exon | 25342468 | 25342586 | . | + | . | gene_id "XLOC_017287"; transcript_id "TCONS_00028841"; exon_number |

"7"; oId "CUFF.30253.14"; tss\_id "TSS21823";  
chr15 Cufflinks exon25343864 25343975 . + . gene\_id "XLOC\_017287"; transcript\_id "TCONS\_00028841"; exon\_number  
"8"; oId "CUFF.30253.14"; tss\_id "TSS21823";  
chr15 Cufflinks exon25344292 25344425 . + . gene\_id "XLOC\_017287"; transcript\_id "TCONS\_00028841"; exon\_number  
"9"; oId "CUFF.30253.14"; tss\_id "TSS21823";  
chr15 Cufflinks exon25349006 25349117 . + . gene\_id "XLOC\_017287"; transcript\_id "TCONS\_00028841"; exon\_number  
"10"; oId "CUFF.30253.14"; tss\_id "TSS21823";  
chr15 Cufflinks exon25351311 25351441 . + . gene\_id "XLOC\_017287"; transcript\_id "TCONS\_00028841"; exon\_number  
"11"; oId "CUFF.30253.14"; tss\_id "TSS21823";  
chr15 Cufflinks exon25352619 25352735 . + . gene\_id "XLOC\_017287"; transcript\_id "TCONS\_00028841"; exon\_number  
"12"; oId "CUFF.30253.14"; tss\_id "TSS21823";  
chr15 Cufflinks exon25353057 25353185 . + . gene\_id "XLOC\_017287"; transcript\_id "TCONS\_00028841"; exon\_number  
"13"; oId "CUFF.30253.14"; tss\_id "TSS21823";  
chr15 Cufflinks exon25354145 25354550 . + . gene\_id "XLOC\_017287"; transcript\_id "TCONS\_00028841"; exon\_number  
"14"; oId "CUFF.30253.14"; tss\_id "TSS21823";  
chr15 Cufflinks exon25354702 25354862 . + . gene\_id "XLOC\_017287"; transcript\_id "TCONS\_00028841"; exon\_number  
"15"; oId "CUFF.30253.14"; tss\_id "TSS21823";  
chr15 Cufflinks exon25356912 25357041 . + . gene\_id "XLOC\_017287"; transcript\_id "TCONS\_00028841"; exon\_number  
"16"; oId "CUFF.30253.14"; tss\_id "TSS21823";  
chr15 Cufflinks exon25360446 25360803 . + . gene\_id "XLOC\_017287"; transcript\_id "TCONS\_00028841"; exon\_number  
"17"; oId "CUFF.30253.14"; tss\_id "TSS21823";  
chr15 Cufflinks exon25362557 25362662 . + . gene\_id "XLOC\_017287"; transcript\_id "TCONS\_00028841"; exon\_number  
"18"; oId "CUFF.30253.14"; tss\_id "TSS21823";  
chr15 Cufflinks exon25363415 25363529 . + . gene\_id "XLOC\_017287"; transcript\_id "TCONS\_00028841"; exon\_number  
"19"; oId "CUFF.30253.14"; tss\_id "TSS21823";  
chr15 Cufflinks exon25364212 25367623 . + . gene\_id "XLOC\_017287"; transcript\_id "TCONS\_00028841"; exon\_number  
"20"; oId "CUFF.30253.14"; tss\_id "TSS21823";  
chr15 Cufflinks exon25361692 25362662 . + . gene\_id "XLOC\_017287"; transcript\_id "TCONS\_00028846"; exon\_number  
"1"; oId "CUFF.30253.16"; tss\_id "TSS21825";  
chr15 Cufflinks exon25363415 25363529 . + . gene\_id "XLOC\_017287"; transcript\_id "TCONS\_00028846"; exon\_number  
"2"; oId "CUFF.30253.16"; tss\_id "TSS21825";  
chr15 Cufflinks exon25364212 25367623 . + . gene\_id "XLOC\_017287"; transcript\_id "TCONS\_00028846"; exon\_number  
"3"; oId "CUFF.30253.16"; tss\_id "TSS21825";  
chr15 Cufflinks exon31127136 31127289 . + . gene\_id "XLOC\_017356"; transcript\_id "TCONS\_00028957"; exon\_number  
"1"; oId "CUFF.30445.6"; tss\_id "TSS21914";  
chr15 Cufflinks exon31127374 31127492 . + . gene\_id "XLOC\_017356"; transcript\_id "TCONS\_00028957"; exon\_number  
"2"; oId "CUFF.30445.6"; tss\_id "TSS21914";  
chr15 Cufflinks exon31128397 31128522 . + . gene\_id "XLOC\_017356"; transcript\_id "TCONS\_00028957"; exon\_number  
"3"; oId "CUFF.30445.6"; tss\_id "TSS21914";  
chr15 Cufflinks exon31128958 31129113 . + . gene\_id "XLOC\_017356"; transcript\_id "TCONS\_00028957"; exon\_number  
"4"; oId "CUFF.30445.6"; tss\_id "TSS21914";  
chr15 Cufflinks exon31174341 31174644 . + . gene\_id "XLOC\_017356"; transcript\_id "TCONS\_00028957"; exon\_number  
"5"; oId "CUFF.30445.6"; tss\_id "TSS21914";



|       |                        |          |   |   |   |                                                                                                                |
|-------|------------------------|----------|---|---|---|----------------------------------------------------------------------------------------------------------------|
| chr15 | Cufflinks exon40331478 | 40331649 | . | + | . | gene_id "XLOC_017438"; transcript_id "TCONS_00029066"; exon_number "1"; oId "CUFF.30753.2"; tss_id "TSS22006"; |
| chr15 | Cufflinks exon40338162 | 40338270 | . | + | . | gene_id "XLOC_017438"; transcript_id "TCONS_00029066"; exon_number "2"; oId "CUFF.30753.2"; tss_id "TSS22006"; |
| chr15 | Cufflinks exon40345978 | 40348615 | . | + | . | gene_id "XLOC_017438"; transcript_id "TCONS_00029066"; exon_number "3"; oId "CUFF.30753.2"; tss_id "TSS22006"; |
| chr15 | Cufflinks exon41166046 | 41166121 | . | + | . | gene_id "XLOC_017470"; transcript_id "TCONS_00029124"; exon_number "1"; oId "CUFF.30854.1"; tss_id "TSS22045"; |
| chr15 | Cufflinks exon41166508 | 41166636 | . | + | . | gene_id "XLOC_017470"; transcript_id "TCONS_00029124"; exon_number "2"; oId "CUFF.30854.1"; tss_id "TSS22045"; |
| chr15 | Cufflinks exon41185749 | 41185782 | . | + | . | gene_id "XLOC_017470"; transcript_id "TCONS_00029124"; exon_number "3"; oId "CUFF.30854.1"; tss_id "TSS22045"; |
| chr15 | Cufflinks exon41576133 | 41576308 | . | + | . | gene_id "XLOC_017481"; transcript_id "TCONS_00029140"; exon_number "1"; oId "CUFF.30878.1"; tss_id "TSS22057"; |
| chr15 | Cufflinks exon41577423 | 41577561 | . | + | . | gene_id "XLOC_017481"; transcript_id "TCONS_00029140"; exon_number "2"; oId "CUFF.30878.1"; tss_id "TSS22057"; |
| chr15 | Cufflinks exon41578209 | 41578298 | . | + | . | gene_id "XLOC_017481"; transcript_id "TCONS_00029140"; exon_number "3"; oId "CUFF.30878.1"; tss_id "TSS22057"; |
| chr15 | Cufflinks exon41590239 | 41598732 | . | + | . | gene_id "XLOC_017481"; transcript_id "TCONS_00029140"; exon_number "4"; oId "CUFF.30878.1"; tss_id "TSS22057"; |
| chr15 | Cufflinks exon44139833 | 44139990 | . | + | . | gene_id "XLOC_017525"; transcript_id "TCONS_00029229"; exon_number "1"; oId "CUFF.31043.1"; tss_id "TSS22113"; |
| chr15 | Cufflinks exon44174793 | 44178448 | . | + | . | gene_id "XLOC_017525"; transcript_id "TCONS_00029229"; exon_number "2"; oId "CUFF.31043.1"; tss_id "TSS22113"; |
| chr15 | Cufflinks exon48938032 | 48939027 | . | + | . | gene_id "XLOC_017562"; transcript_id "TCONS_00029291"; exon_number "1"; oId "CUFF.31212.1"; tss_id "TSS22156"; |
| chr15 | Cufflinks exon48943151 | 48944188 | . | + | . | gene_id "XLOC_017562"; transcript_id "TCONS_00029291"; exon_number "2"; oId "CUFF.31212.1"; tss_id "TSS22156"; |
| chr15 | Cufflinks exon48939076 | 48939273 | . | + | . | gene_id "XLOC_017562"; transcript_id "TCONS_00029292"; exon_number "1"; oId "CUFF.31212.2"; tss_id "TSS22157"; |
| chr15 | Cufflinks exon48943151 | 48944188 | . | + | . | gene_id "XLOC_017562"; transcript_id "TCONS_00029292"; exon_number "2"; oId "CUFF.31212.2"; tss_id "TSS22157"; |
| chr15 | Cufflinks exon52472223 | 52472598 | . | + | . | gene_id "XLOC_017604"; transcript_id "TCONS_00029359"; exon_number "1"; oId "CUFF.31394.1"; tss_id "TSS22203"; |
| chr15 | Cufflinks exon52473247 | 52473399 | . | + | . | gene_id "XLOC_017604"; transcript_id "TCONS_00029359"; exon_number "2"; oId "CUFF.31394.1"; tss_id "TSS22203"; |
| chr15 | Cufflinks exon52497086 | 52498076 | . | + | . | gene_id "XLOC_017604"; transcript_id "TCONS_00029359"; exon_number "3"; oId "CUFF.31394.1"; tss_id "TSS22203"; |
| chr15 | Cufflinks exon57589218 | 57591577 | . | + | . | gene_id "XLOC_017623"; transcript_id "TCONS_00029389"; exon_number "1"; oId "CUFF.31526.2"; tss_id "TSS22224"; |
| chr15 | Cufflinks exon57592671 | 57593122 | . | + | . | gene_id "XLOC_017623"; transcript_id "TCONS_00029389"; exon_number "2"; oId "CUFF.31526.2"; tss_id "TSS22224"; |
| chr15 | Cufflinks exon57595100 | 57595211 | . | + | . | gene_id "XLOC_017623"; transcript_id "TCONS_00029389"; exon_number "3"; oId "CUFF.31526.2"; tss_id "TSS22224"; |

"3"; oId "CUFF.31526.2"; tss\_id "TSS22224";  
chr15 Cufflinks exon57595298 57595329 . + . gene\_id "XLOC\_017623"; transcript\_id "TCONS\_00029389"; exon\_number  
"4"; oId "CUFF.31526.2"; tss\_id "TSS22224";  
chr15 Cufflinks exon57598945 57599266 . + . gene\_id "XLOC\_017623"; transcript\_id "TCONS\_00029389"; exon\_number  
"5"; oId "CUFF.31526.2"; tss\_id "TSS22224";  
chr15 Cufflinks exon57599740 57599967 . + . gene\_id "XLOC\_017623"; transcript\_id "TCONS\_00029389"; exon\_number  
"6"; oId "CUFF.31526.2"; tss\_id "TSS22224";  
chr15 Cufflinks exon57589218 57591577 . + . gene\_id "XLOC\_017623"; transcript\_id "TCONS\_00029388"; exon\_number  
"1"; oId "CUFF.31526.1"; tss\_id "TSS22224";  
chr15 Cufflinks exon57592189 57593122 . + . gene\_id "XLOC\_017623"; transcript\_id "TCONS\_00029388"; exon\_number  
"2"; oId "CUFF.31526.1"; tss\_id "TSS22224";  
chr15 Cufflinks exon57599740 57599967 . + . gene\_id "XLOC\_017623"; transcript\_id "TCONS\_00029388"; exon\_number  
"3"; oId "CUFF.31526.1"; tss\_id "TSS22224";  
chr15 Cufflinks exon57592563 57599266 . + . gene\_id "XLOC\_017623"; transcript\_id "TCONS\_00029392"; exon\_number  
"1"; oId "CUFF.31526.6"; tss\_id "TSS22225";  
chr15 Cufflinks exon57599740 57599967 . + . gene\_id "XLOC\_017623"; transcript\_id "TCONS\_00029392"; exon\_number  
"2"; oId "CUFF.31526.6"; tss\_id "TSS22225";  
chr15 Cufflinks exon57592563 57593122 . + . gene\_id "XLOC\_017623"; transcript\_id "TCONS\_00029391"; exon\_number  
"1"; oId "CUFF.31526.5"; tss\_id "TSS22225";  
chr15 Cufflinks exon57597517 57599967 . + . gene\_id "XLOC\_017623"; transcript\_id "TCONS\_00029391"; exon\_number  
"2"; oId "CUFF.31526.5"; tss\_id "TSS22225";  
chr15 Cufflinks exon57592563 57593122 . + . gene\_id "XLOC\_017623"; transcript\_id "TCONS\_00029390"; exon\_number  
"1"; oId "CUFF.31526.4"; tss\_id "TSS22225";  
chr15 Cufflinks exon57597517 57599266 . + . gene\_id "XLOC\_017623"; transcript\_id "TCONS\_00029390"; exon\_number  
"2"; oId "CUFF.31526.4"; tss\_id "TSS22225";  
chr15 Cufflinks exon57599762 57599967 . + . gene\_id "XLOC\_017623"; transcript\_id "TCONS\_00029390"; exon\_number  
"3"; oId "CUFF.31526.4"; tss\_id "TSS22225";  
chr15 Cufflinks exon57593127 57599266 . + . gene\_id "XLOC\_017623"; transcript\_id "TCONS\_00029393"; exon\_number  
"1"; oId "CUFF.31526.7"; tss\_id "TSS22226";  
chr15 Cufflinks exon57599762 57599967 . + . gene\_id "XLOC\_017623"; transcript\_id "TCONS\_00029393"; exon\_number  
"2"; oId "CUFF.31526.7"; tss\_id "TSS22226";  
chr15 Cufflinks exon58069412 58069943 . + . gene\_id "XLOC\_017630"; transcript\_id "TCONS\_00029403"; exon\_number  
"1"; oId "CUFF.31538.1"; tss\_id "TSS22235";  
chr15 Cufflinks exon58073774 58075732 . + . gene\_id "XLOC\_017630"; transcript\_id "TCONS\_00029403"; exon\_number  
"2"; oId "CUFF.31538.1"; tss\_id "TSS22235";  
chr15 Cufflinks exon58069617 58069944 . + . gene\_id "XLOC\_017630"; transcript\_id "TCONS\_00029404"; exon\_number  
"1"; oId "CUFF.31538.3"; tss\_id "TSS22236";  
chr15 Cufflinks exon58073775 58075732 . + . gene\_id "XLOC\_017630"; transcript\_id "TCONS\_00029404"; exon\_number  
"2"; oId "CUFF.31538.3"; tss\_id "TSS22236";  
chr15 Cufflinks exon60771377 60771597 . + . gene\_id "XLOC\_017657"; transcript\_id "TCONS\_00029447"; exon\_number  
"1"; oId "CUFF.31663.4"; tss\_id "TSS22269";  
chr15 Cufflinks exon60780723 60780790 . + . gene\_id "XLOC\_017657"; transcript\_id "TCONS\_00029447"; exon\_number  
"2"; oId "CUFF.31663.4"; tss\_id "TSS22269";

|       |                |          |          |   |   |   |                                                                                                                |
|-------|----------------|----------|----------|---|---|---|----------------------------------------------------------------------------------------------------------------|
| chr15 | Cufflinks exon | 60802605 | 60802733 | . | + | . | gene_id "XLOC_017657"; transcript_id "TCONS_00029447"; exon_number "3"; oId "CUFF.31663.4"; tss_id "TSS22269"; |
| chr15 | Cufflinks exon | 60820780 | 60821389 | . | + | . | gene_id "XLOC_017657"; transcript_id "TCONS_00029447"; exon_number "4"; oId "CUFF.31663.4"; tss_id "TSS22269"; |
| chr15 | Cufflinks exon | 60771377 | 60771597 | . | + | . | gene_id "XLOC_017657"; transcript_id "TCONS_00029449"; exon_number "1"; oId "CUFF.31663.5"; tss_id "TSS22269"; |
| chr15 | Cufflinks exon | 60780723 | 60780790 | . | + | . | gene_id "XLOC_017657"; transcript_id "TCONS_00029449"; exon_number "2"; oId "CUFF.31663.5"; tss_id "TSS22269"; |
| chr15 | Cufflinks exon | 60802607 | 60802732 | . | + | . | gene_id "XLOC_017657"; transcript_id "TCONS_00029449"; exon_number "3"; oId "CUFF.31663.5"; tss_id "TSS22269"; |
| chr15 | Cufflinks exon | 60820779 | 60820926 | . | + | . | gene_id "XLOC_017657"; transcript_id "TCONS_00029449"; exon_number "4"; oId "CUFF.31663.5"; tss_id "TSS22269"; |
| chr15 | Cufflinks exon | 60821741 | 60823822 | . | + | . | gene_id "XLOC_017657"; transcript_id "TCONS_00029449"; exon_number "5"; oId "CUFF.31663.5"; tss_id "TSS22269"; |
| chr15 | Cufflinks exon | 60771377 | 60771597 | . | + | . | gene_id "XLOC_017657"; transcript_id "TCONS_00029448"; exon_number "1"; oId "CUFF.31663.3"; tss_id "TSS22269"; |
| chr15 | Cufflinks exon | 60780723 | 60780790 | . | + | . | gene_id "XLOC_017657"; transcript_id "TCONS_00029448"; exon_number "2"; oId "CUFF.31663.3"; tss_id "TSS22269"; |
| chr15 | Cufflinks exon | 60802607 | 60802732 | . | + | . | gene_id "XLOC_017657"; transcript_id "TCONS_00029448"; exon_number "3"; oId "CUFF.31663.3"; tss_id "TSS22269"; |
| chr15 | Cufflinks exon | 60812165 | 60812468 | . | + | . | gene_id "XLOC_017657"; transcript_id "TCONS_00029448"; exon_number "4"; oId "CUFF.31663.3"; tss_id "TSS22269"; |
| chr15 | Cufflinks exon | 60820779 | 60820926 | . | + | . | gene_id "XLOC_017657"; transcript_id "TCONS_00029448"; exon_number "5"; oId "CUFF.31663.3"; tss_id "TSS22269"; |
| chr15 | Cufflinks exon | 60822085 | 60823822 | . | + | . | gene_id "XLOC_017657"; transcript_id "TCONS_00029448"; exon_number "6"; oId "CUFF.31663.3"; tss_id "TSS22269"; |
| chr15 | Cufflinks exon | 60771377 | 60771597 | . | + | . | gene_id "XLOC_017657"; transcript_id "TCONS_00029450"; exon_number "1"; oId "CUFF.31663.2"; tss_id "TSS22269"; |
| chr15 | Cufflinks exon | 60802607 | 60802732 | . | + | . | gene_id "XLOC_017657"; transcript_id "TCONS_00029450"; exon_number "2"; oId "CUFF.31663.2"; tss_id "TSS22269"; |
| chr15 | Cufflinks exon | 60890647 | 60890711 | . | + | . | gene_id "XLOC_017657"; transcript_id "TCONS_00029450"; exon_number "3"; oId "CUFF.31663.2"; tss_id "TSS22269"; |
| chr15 | Cufflinks exon | 60893170 | 60893256 | . | + | . | gene_id "XLOC_017657"; transcript_id "TCONS_00029450"; exon_number "4"; oId "CUFF.31663.2"; tss_id "TSS22269"; |
| chr15 | Cufflinks exon | 60922643 | 60922838 | . | + | . | gene_id "XLOC_017657"; transcript_id "TCONS_00029450"; exon_number "5"; oId "CUFF.31663.2"; tss_id "TSS22269"; |
| chr15 | Cufflinks exon | 66187104 | 66191178 | . | + | . | gene_id "XLOC_017737"; transcript_id "TCONS_00029565"; exon_number "1"; oId "CUFF.31905.1"; tss_id "TSS22363"; |
| chr15 | Cufflinks exon | 66196274 | 66201043 | . | + | . | gene_id "XLOC_017737"; transcript_id "TCONS_00029565"; exon_number "2"; oId "CUFF.31905.1"; tss_id "TSS22363"; |
| chr15 | Cufflinks exon | 69113508 | 69113590 | . | + | . | gene_id "XLOC_017773"; transcript_id "TCONS_00029609"; exon_number "1"; oId "CUFF.32052.1"; tss_id "TSS22404"; |
| chr15 | Cufflinks exon | 69114032 | 69123146 | . | + | . | gene_id "XLOC_017773"; transcript_id "TCONS_00029609"; exon_number                                             |

|                                             |   |   |   |                                                                    |  |
|---------------------------------------------|---|---|---|--------------------------------------------------------------------|--|
| "2"; oId "CUFF.32052.1"; tss_id "TSS22404"; |   |   |   |                                                                    |  |
| chr15 Cufflinks exon69113536 69117295       | . | + | . | gene_id "XLOC_017773"; transcript_id "TCONS_00029611"; exon_number |  |
| "1"; oId "CUFF.32052.3"; tss_id "TSS22404"; |   |   |   |                                                                    |  |
| chr15 Cufflinks exon69117913 69123146       | . | + | . | gene_id "XLOC_017773"; transcript_id "TCONS_00029611"; exon_number |  |
| "2"; oId "CUFF.32052.3"; tss_id "TSS22404"; |   |   |   |                                                                    |  |
| chr15 Cufflinks exon69115959 69115979       | . | + | . | gene_id "XLOC_017773"; transcript_id "TCONS_00029612"; exon_number |  |
| "1"; oId "CUFF.32052.4"; tss_id "TSS22405"; |   |   |   |                                                                    |  |
| chr15 Cufflinks exon69116915 69123146       | . | + | . | gene_id "XLOC_017773"; transcript_id "TCONS_00029612"; exon_number |  |
| "2"; oId "CUFF.32052.4"; tss_id "TSS22405"; |   |   |   |                                                                    |  |
| chr15 Cufflinks exon74673933 74673992       | . | + | . | gene_id "XLOC_017827"; transcript_id "TCONS_00029691"; exon_number |  |
| "1"; oId "CUFF.32213.1"; tss_id "TSS22468"; |   |   |   |                                                                    |  |
| chr15 Cufflinks exon74682859 74685711       | . | + | . | gene_id "XLOC_017827"; transcript_id "TCONS_00029691"; exon_number |  |
| "2"; oId "CUFF.32213.1"; tss_id "TSS22468"; |   |   |   |                                                                    |  |
| chr15 Cufflinks exon74679305 74679930       | . | + | . | gene_id "XLOC_017827"; transcript_id "TCONS_00029693"; exon_number |  |
| "1"; oId "CUFF.32213.3"; tss_id "TSS22469"; |   |   |   |                                                                    |  |
| chr15 Cufflinks exon74682859 74683421       | . | + | . | gene_id "XLOC_017827"; transcript_id "TCONS_00029693"; exon_number |  |
| "2"; oId "CUFF.32213.3"; tss_id "TSS22469"; |   |   |   |                                                                    |  |
| chr15 Cufflinks exon74685647 74685711       | . | + | . | gene_id "XLOC_017827"; transcript_id "TCONS_00029693"; exon_number |  |
| "3"; oId "CUFF.32213.3"; tss_id "TSS22469"; |   |   |   |                                                                    |  |
| chr15 Cufflinks exon74679305 74679930       | . | + | . | gene_id "XLOC_017827"; transcript_id "TCONS_00029692"; exon_number |  |
| "1"; oId "CUFF.32213.2"; tss_id "TSS22469"; |   |   |   |                                                                    |  |
| chr15 Cufflinks exon74682859 74685711       | . | + | . | gene_id "XLOC_017827"; transcript_id "TCONS_00029692"; exon_number |  |
| "2"; oId "CUFF.32213.2"; tss_id "TSS22469"; |   |   |   |                                                                    |  |
| chr15 Cufflinks exon74753606 74754372       | . | + | . | gene_id "XLOC_017828"; transcript_id "TCONS_00029696"; exon_number |  |
| "1"; oId "CUFF.32221.3"; tss_id "TSS22470"; |   |   |   |                                                                    |  |
| chr15 Cufflinks exon74758377 74758471       | . | + | . | gene_id "XLOC_017828"; transcript_id "TCONS_00029696"; exon_number |  |
| "2"; oId "CUFF.32221.3"; tss_id "TSS22470"; |   |   |   |                                                                    |  |
| chr15 Cufflinks exon74771401 74771619       | . | + | . | gene_id "XLOC_017828"; transcript_id "TCONS_00029696"; exon_number |  |
| "3"; oId "CUFF.32221.3"; tss_id "TSS22470"; |   |   |   |                                                                    |  |
| chr15 Cufflinks exon74773392 74773633       | . | + | . | gene_id "XLOC_017828"; transcript_id "TCONS_00029696"; exon_number |  |
| "4"; oId "CUFF.32221.3"; tss_id "TSS22470"; |   |   |   |                                                                    |  |
| chr15 Cufflinks exon74753606 74754439       | . | + | . | gene_id "XLOC_017828"; transcript_id "TCONS_00029695"; exon_number |  |
| "1"; oId "CUFF.32221.2"; tss_id "TSS22470"; |   |   |   |                                                                    |  |
| chr15 Cufflinks exon74758377 74758471       | . | + | . | gene_id "XLOC_017828"; transcript_id "TCONS_00029695"; exon_number |  |
| "2"; oId "CUFF.32221.2"; tss_id "TSS22470"; |   |   |   |                                                                    |  |
| chr15 Cufflinks exon74771401 74771619       | . | + | . | gene_id "XLOC_017828"; transcript_id "TCONS_00029695"; exon_number |  |
| "3"; oId "CUFF.32221.2"; tss_id "TSS22470"; |   |   |   |                                                                    |  |
| chr15 Cufflinks exon74772962 74773255       | . | + | . | gene_id "XLOC_017828"; transcript_id "TCONS_00029695"; exon_number |  |
| "4"; oId "CUFF.32221.2"; tss_id "TSS22470"; |   |   |   |                                                                    |  |
| chr15 Cufflinks exon74773392 74773633       | . | + | . | gene_id "XLOC_017828"; transcript_id "TCONS_00029695"; exon_number |  |
| "5"; oId "CUFF.32221.2"; tss_id "TSS22470"; |   |   |   |                                                                    |  |
| chr15 Cufflinks exon74753606 74754368       | . | + | . | gene_id "XLOC_017828"; transcript_id "TCONS_00029694"; exon_number |  |
| "1"; oId "CUFF.32221.1"; tss_id "TSS22470"; |   |   |   |                                                                    |  |

|       |                        |          |   |   |   |                                                                                                                |
|-------|------------------------|----------|---|---|---|----------------------------------------------------------------------------------------------------------------|
| chr15 | Cufflinks exon74758377 | 74758471 | . | + | . | gene_id "XLOC_017828"; transcript_id "TCONS_00029694"; exon_number "2"; oId "CUFF.32221.1"; tss_id "TSS22470"; |
| chr15 | Cufflinks exon74771401 | 74771619 | . | + | . | gene_id "XLOC_017828"; transcript_id "TCONS_00029694"; exon_number "3"; oId "CUFF.32221.1"; tss_id "TSS22470"; |
| chr15 | Cufflinks exon74773392 | 74773633 | . | + | . | gene_id "XLOC_017828"; transcript_id "TCONS_00029694"; exon_number "4"; oId "CUFF.32221.1"; tss_id "TSS22470"; |
| chr15 | Cufflinks exon74890838 | 74891729 | . | + | . | gene_id "XLOC_017833"; transcript_id "TCONS_00029702"; exon_number "1"; oId "CUFF.32263.1"; tss_id "TSS22475"; |
| chr15 | Cufflinks exon74895508 | 74895587 | . | + | . | gene_id "XLOC_017833"; transcript_id "TCONS_00029702"; exon_number "2"; oId "CUFF.32263.1"; tss_id "TSS22475"; |
| chr15 | Cufflinks exon74897396 | 74897938 | . | + | . | gene_id "XLOC_017833"; transcript_id "TCONS_00029702"; exon_number "3"; oId "CUFF.32263.1"; tss_id "TSS22475"; |
| chr15 | Cufflinks exon74891731 | 74894236 | . | + | . | gene_id "XLOC_017833"; transcript_id "TCONS_00029703"; exon_number "1"; oId "CUFF.32263.2"; tss_id "TSS22476"; |
| chr15 | Cufflinks exon74895508 | 74895594 | . | + | . | gene_id "XLOC_017833"; transcript_id "TCONS_00029703"; exon_number "2"; oId "CUFF.32263.2"; tss_id "TSS22476"; |
| chr15 | Cufflinks exon74897281 | 74897291 | . | + | . | gene_id "XLOC_017833"; transcript_id "TCONS_00029703"; exon_number "3"; oId "CUFF.32263.2"; tss_id "TSS22476"; |
| chr15 | Cufflinks exon79213595 | 79213663 | . | + | . | gene_id "XLOC_017904"; transcript_id "TCONS_00029822"; exon_number "1"; oId "CUFF.32504.1"; tss_id "TSS22563"; |
| chr15 | Cufflinks exon79213917 | 79216339 | . | + | . | gene_id "XLOC_017904"; transcript_id "TCONS_00029822"; exon_number "2"; oId "CUFF.32504.1"; tss_id "TSS22563"; |
| chr15 | Cufflinks exon79704423 | 79705899 | . | + | . | gene_id "XLOC_017924"; transcript_id "TCONS_00029842"; exon_number "1"; oId "CUFF.32559.1"; tss_id "TSS22583"; |
| chr15 | Cufflinks exon79713625 | 79723422 | . | + | . | gene_id "XLOC_017924"; transcript_id "TCONS_00029842"; exon_number "2"; oId "CUFF.32559.1"; tss_id "TSS22583"; |
| chr15 | Cufflinks exon81616656 | 81616902 | . | + | . | gene_id "XLOC_017952"; transcript_id "TCONS_00029882"; exon_number "1"; oId "CUFF.32652.1"; tss_id "TSS22615"; |
| chr15 | Cufflinks exon81624686 | 81624882 | . | + | . | gene_id "XLOC_017952"; transcript_id "TCONS_00029882"; exon_number "2"; oId "CUFF.32652.1"; tss_id "TSS22615"; |
| chr15 | Cufflinks exon81633903 | 81634049 | . | + | . | gene_id "XLOC_017952"; transcript_id "TCONS_00029882"; exon_number "3"; oId "CUFF.32652.1"; tss_id "TSS22615"; |
| chr15 | Cufflinks exon81635074 | 81635751 | . | + | . | gene_id "XLOC_017952"; transcript_id "TCONS_00029882"; exon_number "4"; oId "CUFF.32652.1"; tss_id "TSS22615"; |
| chr15 | Cufflinks exon81616673 | 81616902 | . | + | . | gene_id "XLOC_017952"; transcript_id "TCONS_00029883"; exon_number "1"; oId "CUFF.32652.4"; tss_id "TSS22615"; |
| chr15 | Cufflinks exon81624686 | 81624888 | . | + | . | gene_id "XLOC_017952"; transcript_id "TCONS_00029883"; exon_number "2"; oId "CUFF.32652.4"; tss_id "TSS22615"; |
| chr15 | Cufflinks exon81633909 | 81634049 | . | + | . | gene_id "XLOC_017952"; transcript_id "TCONS_00029883"; exon_number "3"; oId "CUFF.32652.4"; tss_id "TSS22615"; |
| chr15 | Cufflinks exon81635074 | 81635751 | . | + | . | gene_id "XLOC_017952"; transcript_id "TCONS_00029883"; exon_number "4"; oId "CUFF.32652.4"; tss_id "TSS22615"; |
| chr15 | Cufflinks exon81616673 | 81616902 | . | + | . | gene_id "XLOC_017952"; transcript_id "TCONS_00029884"; exon_number "1"; oId "CUFF.32652.4"; tss_id "TSS22615"; |

|                                             |   |   |   |                                                                    |  |
|---------------------------------------------|---|---|---|--------------------------------------------------------------------|--|
| "1"; oId "CUFF.32652.7"; tss_id "TSS22615"; |   |   |   |                                                                    |  |
| chr15 Cufflinks exon81624686 81624882       | . | + | . | gene_id "XLOC_017952"; transcript_id "TCONS_00029884"; exon_number |  |
| "2"; oId "CUFF.32652.7"; tss_id "TSS22615"; |   |   |   |                                                                    |  |
| chr15 Cufflinks exon81633903 81634049       | . | + | . | gene_id "XLOC_017952"; transcript_id "TCONS_00029884"; exon_number |  |
| "3"; oId "CUFF.32652.7"; tss_id "TSS22615"; |   |   |   |                                                                    |  |
| chr15 Cufflinks exon81650677 81650844       | . | + | . | gene_id "XLOC_017952"; transcript_id "TCONS_00029884"; exon_number |  |
| "4"; oId "CUFF.32652.7"; tss_id "TSS22615"; |   |   |   |                                                                    |  |
| chr15 Cufflinks exon81654260 81654377       | . | + | . | gene_id "XLOC_017952"; transcript_id "TCONS_00029884"; exon_number |  |
| "5"; oId "CUFF.32652.7"; tss_id "TSS22615"; |   |   |   |                                                                    |  |
| chr15 Cufflinks exon81654590 81654604       | . | + | . | gene_id "XLOC_017952"; transcript_id "TCONS_00029884"; exon_number |  |
| "6"; oId "CUFF.32652.7"; tss_id "TSS22615"; |   |   |   |                                                                    |  |
| chr15 Cufflinks exon81616673 81616902       | . | + | . | gene_id "XLOC_017952"; transcript_id "TCONS_00029885"; exon_number |  |
| "1"; oId "CUFF.32652.8"; tss_id "TSS22615"; |   |   |   |                                                                    |  |
| chr15 Cufflinks exon81624686 81624882       | . | + | . | gene_id "XLOC_017952"; transcript_id "TCONS_00029885"; exon_number |  |
| "2"; oId "CUFF.32652.8"; tss_id "TSS22615"; |   |   |   |                                                                    |  |
| chr15 Cufflinks exon81633903 81634049       | . | + | . | gene_id "XLOC_017952"; transcript_id "TCONS_00029885"; exon_number |  |
| "3"; oId "CUFF.32652.8"; tss_id "TSS22615"; |   |   |   |                                                                    |  |
| chr15 Cufflinks exon81650677 81650844       | . | + | . | gene_id "XLOC_017952"; transcript_id "TCONS_00029885"; exon_number |  |
| "4"; oId "CUFF.32652.8"; tss_id "TSS22615"; |   |   |   |                                                                    |  |
| chr15 Cufflinks exon81654260 81654377       | . | + | . | gene_id "XLOC_017952"; transcript_id "TCONS_00029885"; exon_number |  |
| "5"; oId "CUFF.32652.8"; tss_id "TSS22615"; |   |   |   |                                                                    |  |
| chr15 Cufflinks exon81672550 81673864       | . | + | . | gene_id "XLOC_017952"; transcript_id "TCONS_00029885"; exon_number |  |
| "6"; oId "CUFF.32652.8"; tss_id "TSS22615"; |   |   |   |                                                                    |  |
| chr15 Cufflinks exon81616673 81616902       | . | + | . | gene_id "XLOC_017952"; transcript_id "TCONS_00029887"; exon_number |  |
| "1"; oId "CUFF.32652.5"; tss_id "TSS22615"; |   |   |   |                                                                    |  |
| chr15 Cufflinks exon81624686 81624882       | . | + | . | gene_id "XLOC_017952"; transcript_id "TCONS_00029887"; exon_number |  |
| "2"; oId "CUFF.32652.5"; tss_id "TSS22615"; |   |   |   |                                                                    |  |
| chr15 Cufflinks exon81633903 81634049       | . | + | . | gene_id "XLOC_017952"; transcript_id "TCONS_00029887"; exon_number |  |
| "3"; oId "CUFF.32652.5"; tss_id "TSS22615"; |   |   |   |                                                                    |  |
| chr15 Cufflinks exon81650677 81650844       | . | + | . | gene_id "XLOC_017952"; transcript_id "TCONS_00029887"; exon_number |  |
| "4"; oId "CUFF.32652.5"; tss_id "TSS22615"; |   |   |   |                                                                    |  |
| chr15 Cufflinks exon81654260 81654377       | . | + | . | gene_id "XLOC_017952"; transcript_id "TCONS_00029887"; exon_number |  |
| "5"; oId "CUFF.32652.5"; tss_id "TSS22615"; |   |   |   |                                                                    |  |
| chr15 Cufflinks exon81672550 81672595       | . | + | . | gene_id "XLOC_017952"; transcript_id "TCONS_00029887"; exon_number |  |
| "6"; oId "CUFF.32652.5"; tss_id "TSS22615"; |   |   |   |                                                                    |  |
| chr15 Cufflinks exon81693134 81695333       | . | + | . | gene_id "XLOC_017952"; transcript_id "TCONS_00029887"; exon_number |  |
| "7"; oId "CUFF.32652.5"; tss_id "TSS22615"; |   |   |   |                                                                    |  |
| chr15 Cufflinks exon81616673 81616902       | . | + | . | gene_id "XLOC_017952"; transcript_id "TCONS_00029886"; exon_number |  |
| "1"; oId "CUFF.32652.2"; tss_id "TSS22615"; |   |   |   |                                                                    |  |
| chr15 Cufflinks exon81624686 81624882       | . | + | . | gene_id "XLOC_017952"; transcript_id "TCONS_00029886"; exon_number |  |
| "2"; oId "CUFF.32652.2"; tss_id "TSS22615"; |   |   |   |                                                                    |  |
| chr15 Cufflinks exon81633903 81634049       | . | + | . | gene_id "XLOC_017952"; transcript_id "TCONS_00029886"; exon_number |  |
| "3"; oId "CUFF.32652.2"; tss_id "TSS22615"; |   |   |   |                                                                    |  |

|                                             |                |          |          |   |   |   |                                                                    |
|---------------------------------------------|----------------|----------|----------|---|---|---|--------------------------------------------------------------------|
| chr15                                       | Cufflinks exon | 81650677 | 81650844 | . | + | . | gene_id "XLOC_017952"; transcript_id "TCONS_00029886"; exon_number |
| "4"; oId "CUFF.32652.2"; tss_id "TSS22615"; |                |          |          |   |   |   |                                                                    |
| chr15                                       | Cufflinks exon | 81654260 | 81654377 | . | + | . | gene_id "XLOC_017952"; transcript_id "TCONS_00029886"; exon_number |
| "5"; oId "CUFF.32652.2"; tss_id "TSS22615"; |                |          |          |   |   |   |                                                                    |
| chr15                                       | Cufflinks exon | 81672550 | 81672595 | . | + | . | gene_id "XLOC_017952"; transcript_id "TCONS_00029886"; exon_number |
| "6"; oId "CUFF.32652.2"; tss_id "TSS22615"; |                |          |          |   |   |   |                                                                    |
| chr15                                       | Cufflinks exon | 81693056 | 81695333 | . | + | . | gene_id "XLOC_017952"; transcript_id "TCONS_00029886"; exon_number |
| "7"; oId "CUFF.32652.2"; tss_id "TSS22615"; |                |          |          |   |   |   |                                                                    |
| chr15                                       | Cufflinks exon | 81616673 | 81616902 | . | + | . | gene_id "XLOC_017952"; transcript_id "TCONS_00029888"; exon_number |
| "1"; oId "CUFF.32652.3"; tss_id "TSS22615"; |                |          |          |   |   |   |                                                                    |
| chr15                                       | Cufflinks exon | 81624686 | 81624882 | . | + | . | gene_id "XLOC_017952"; transcript_id "TCONS_00029888"; exon_number |
| "2"; oId "CUFF.32652.3"; tss_id "TSS22615"; |                |          |          |   |   |   |                                                                    |
| chr15                                       | Cufflinks exon | 81633903 | 81634049 | . | + | . | gene_id "XLOC_017952"; transcript_id "TCONS_00029888"; exon_number |
| "3"; oId "CUFF.32652.3"; tss_id "TSS22615"; |                |          |          |   |   |   |                                                                    |
| chr15                                       | Cufflinks exon | 81650677 | 81650844 | . | + | . | gene_id "XLOC_017952"; transcript_id "TCONS_00029888"; exon_number |
| "4"; oId "CUFF.32652.3"; tss_id "TSS22615"; |                |          |          |   |   |   |                                                                    |
| chr15                                       | Cufflinks exon | 81654260 | 81654377 | . | + | . | gene_id "XLOC_017952"; transcript_id "TCONS_00029888"; exon_number |
| "5"; oId "CUFF.32652.3"; tss_id "TSS22615"; |                |          |          |   |   |   |                                                                    |
| chr15                                       | Cufflinks exon | 81672550 | 81672595 | . | + | . | gene_id "XLOC_017952"; transcript_id "TCONS_00029888"; exon_number |
| "6"; oId "CUFF.32652.3"; tss_id "TSS22615"; |                |          |          |   |   |   |                                                                    |
| chr15                                       | Cufflinks exon | 81701456 | 81703031 | . | + | . | gene_id "XLOC_017952"; transcript_id "TCONS_00029888"; exon_number |
| "7"; oId "CUFF.32652.3"; tss_id "TSS22615"; |                |          |          |   |   |   |                                                                    |
| chr15                                       | Cufflinks exon | 81616673 | 81616902 | . | + | . | gene_id "XLOC_017952"; transcript_id "TCONS_00029889"; exon_number |
| "1"; oId "CUFF.32652.6"; tss_id "TSS22615"; |                |          |          |   |   |   |                                                                    |
| chr15                                       | Cufflinks exon | 81624686 | 81624882 | . | + | . | gene_id "XLOC_017952"; transcript_id "TCONS_00029889"; exon_number |
| "2"; oId "CUFF.32652.6"; tss_id "TSS22615"; |                |          |          |   |   |   |                                                                    |
| chr15                                       | Cufflinks exon | 81633903 | 81634049 | . | + | . | gene_id "XLOC_017952"; transcript_id "TCONS_00029889"; exon_number |
| "3"; oId "CUFF.32652.6"; tss_id "TSS22615"; |                |          |          |   |   |   |                                                                    |
| chr15                                       | Cufflinks exon | 81650677 | 81650844 | . | + | . | gene_id "XLOC_017952"; transcript_id "TCONS_00029889"; exon_number |
| "4"; oId "CUFF.32652.6"; tss_id "TSS22615"; |                |          |          |   |   |   |                                                                    |
| chr15                                       | Cufflinks exon | 81654260 | 81654377 | . | + | . | gene_id "XLOC_017952"; transcript_id "TCONS_00029889"; exon_number |
| "5"; oId "CUFF.32652.6"; tss_id "TSS22615"; |                |          |          |   |   |   |                                                                    |
| chr15                                       | Cufflinks exon | 81672550 | 81672595 | . | + | . | gene_id "XLOC_017952"; transcript_id "TCONS_00029889"; exon_number |
| "6"; oId "CUFF.32652.6"; tss_id "TSS22615"; |                |          |          |   |   |   |                                                                    |
| chr15                                       | Cufflinks exon | 81735246 | 81735417 | . | + | . | gene_id "XLOC_017952"; transcript_id "TCONS_00029889"; exon_number |
| "7"; oId "CUFF.32652.6"; tss_id "TSS22615"; |                |          |          |   |   |   |                                                                    |
| chr15                                       | Cufflinks exon | 81649860 | 81649888 | . | + | . | gene_id "XLOC_017952"; transcript_id "TCONS_00029891"; exon_number |
| "1"; oId "CUFF.32652.9"; tss_id "TSS22616"; |                |          |          |   |   |   |                                                                    |
| chr15                                       | Cufflinks exon | 81650677 | 81650844 | . | + | . | gene_id "XLOC_017952"; transcript_id "TCONS_00029891"; exon_number |
| "2"; oId "CUFF.32652.9"; tss_id "TSS22616"; |                |          |          |   |   |   |                                                                    |
| chr15                                       | Cufflinks exon | 81654260 | 81654377 | . | + | . | gene_id "XLOC_017952"; transcript_id "TCONS_00029891"; exon_number |
| "3"; oId "CUFF.32652.9"; tss_id "TSS22616"; |                |          |          |   |   |   |                                                                    |
| chr15                                       | Cufflinks exon | 81672550 | 81672595 | . | + | . | gene_id "XLOC_017952"; transcript_id "TCONS_00029891"; exon_number |

"4"; oId "CUFF.32652.9"; tss\_id "TSS22616";  
chr15 Cufflinks exon81711325 81712435 . + . gene\_id "XLOC\_017952"; transcript\_id "TCONS\_00029891"; exon\_number  
"5"; oId "CUFF.32652.9"; tss\_id "TSS22616";  
chr15 Cufflinks exon81706904 81707450 . + . gene\_id "XLOC\_017952"; transcript\_id "TCONS\_00029895"; exon\_number  
"1"; oId "CUFF.32652.13"; tss\_id "TSS22618";  
chr15 Cufflinks exon81711325 81712435 . + . gene\_id "XLOC\_017952"; transcript\_id "TCONS\_00029895"; exon\_number  
"2"; oId "CUFF.32652.13"; tss\_id "TSS22618";  
chr15 Cufflinks exon83419290 83419466 . + . gene\_id "XLOC\_017970"; transcript\_id "TCONS\_00029942"; exon\_number  
"1"; oId "CUFF.32743.1"; tss\_id "TSS22647";  
chr15 Cufflinks exon83423381 83425537 . + . gene\_id "XLOC\_017970"; transcript\_id "TCONS\_00029942"; exon\_number  
"2"; oId "CUFF.32743.1"; tss\_id "TSS22647";  
chr15 Cufflinks exon83425656 83428370 . + . gene\_id "XLOC\_017970"; transcript\_id "TCONS\_00029942"; exon\_number  
"3"; oId "CUFF.32743.1"; tss\_id "TSS22647";  
chr15 Cufflinks exon83419313 83419600 . + . gene\_id "XLOC\_017970"; transcript\_id "TCONS\_00029943"; exon\_number  
"1"; oId "CUFF.32743.2"; tss\_id "TSS22647";  
chr15 Cufflinks exon83423381 83428370 . + . gene\_id "XLOC\_017970"; transcript\_id "TCONS\_00029943"; exon\_number  
"2"; oId "CUFF.32743.2"; tss\_id "TSS22647";  
chr15 Cufflinks exon83419316 83419600 . + . gene\_id "XLOC\_017970"; transcript\_id "TCONS\_00029945"; exon\_number  
"1"; oId "CUFF.32743.4"; tss\_id "TSS22647";  
chr15 Cufflinks exon83423381 83423536 . + . gene\_id "XLOC\_017970"; transcript\_id "TCONS\_00029945"; exon\_number  
"2"; oId "CUFF.32743.4"; tss\_id "TSS22647";  
chr15 Cufflinks exon83425656 83428370 . + . gene\_id "XLOC\_017970"; transcript\_id "TCONS\_00029945"; exon\_number  
"3"; oId "CUFF.32743.4"; tss\_id "TSS22647";  
chr15 Cufflinks exon83419316 83419600 . + . gene\_id "XLOC\_017970"; transcript\_id "TCONS\_00029944"; exon\_number  
"1"; oId "CUFF.32743.3"; tss\_id "TSS22647";  
chr15 Cufflinks exon83423381 83423536 . + . gene\_id "XLOC\_017970"; transcript\_id "TCONS\_00029944"; exon\_number  
"2"; oId "CUFF.32743.3"; tss\_id "TSS22647";  
chr15 Cufflinks exon83425482 83425537 . + . gene\_id "XLOC\_017970"; transcript\_id "TCONS\_00029944"; exon\_number  
"3"; oId "CUFF.32743.3"; tss\_id "TSS22647";  
chr15 Cufflinks exon83425656 83428370 . + . gene\_id "XLOC\_017970"; transcript\_id "TCONS\_00029944"; exon\_number  
"4"; oId "CUFF.32743.3"; tss\_id "TSS22647";  
chr15 Cufflinks exon89584259 89584531 . + . gene\_id "XLOC\_018066"; transcript\_id "TCONS\_00030098"; exon\_number  
"1"; oId "CUFF.33002.10"; tss\_id "TSS22767";  
chr15 Cufflinks exon89618527 89618615 . + . gene\_id "XLOC\_018066"; transcript\_id "TCONS\_00030098"; exon\_number  
"2"; oId "CUFF.33002.10"; tss\_id "TSS22767";  
chr15 Cufflinks exon89625722 89627874 . + . gene\_id "XLOC\_018066"; transcript\_id "TCONS\_00030098"; exon\_number  
"3"; oId "CUFF.33002.10"; tss\_id "TSS22767";  
chr15 Cufflinks exon89905752 89905962 . + . gene\_id "XLOC\_018074"; transcript\_id "TCONS\_00030107"; exon\_number  
"1"; oId "CUFF.33018.1"; tss\_id "TSS22775";  
chr15 Cufflinks exon89921273 89921396 . + . gene\_id "XLOC\_018074"; transcript\_id "TCONS\_00030107"; exon\_number  
"2"; oId "CUFF.33018.1"; tss\_id "TSS22775";  
chr15 Cufflinks exon89931048 89931112 . + . gene\_id "XLOC\_018074"; transcript\_id "TCONS\_00030107"; exon\_number  
"3"; oId "CUFF.33018.1"; tss\_id "TSS22775";



|       |                        |          |   |   |   |                                                                                                                |
|-------|------------------------|----------|---|---|---|----------------------------------------------------------------------------------------------------------------|
| chr15 | Cufflinks exon89931732 | 89931812 | . | + | . | gene_id "XLOC_018074"; transcript_id "TCONS_00030107"; exon_number "4"; oId "CUFF.33018.1"; tss_id "TSS22775"; |
| chr15 | Cufflinks exon89932576 | 89932713 | . | + | . | gene_id "XLOC_018074"; transcript_id "TCONS_00030107"; exon_number "5"; oId "CUFF.33018.1"; tss_id "TSS22775"; |
| chr15 | Cufflinks exon89938259 | 89941719 | . | + | . | gene_id "XLOC_018074"; transcript_id "TCONS_00030107"; exon_number "6"; oId "CUFF.33018.1"; tss_id "TSS22775"; |
| chr15 | Cufflinks exon89911330 | 89911466 | . | + | . | gene_id "XLOC_018074"; transcript_id "TCONS_00030110"; exon_number "1"; oId "CUFF.33018.4"; tss_id "TSS22776"; |
| chr15 | Cufflinks exon89931048 | 89931112 | . | + | . | gene_id "XLOC_018074"; transcript_id "TCONS_00030110"; exon_number "2"; oId "CUFF.33018.4"; tss_id "TSS22776"; |
| chr15 | Cufflinks exon89931732 | 89931812 | . | + | . | gene_id "XLOC_018074"; transcript_id "TCONS_00030110"; exon_number "3"; oId "CUFF.33018.4"; tss_id "TSS22776"; |
| chr15 | Cufflinks exon89932576 | 89932713 | . | + | . | gene_id "XLOC_018074"; transcript_id "TCONS_00030110"; exon_number "4"; oId "CUFF.33018.4"; tss_id "TSS22776"; |
| chr15 | Cufflinks exon89938259 | 89941719 | . | + | . | gene_id "XLOC_018074"; transcript_id "TCONS_00030110"; exon_number "5"; oId "CUFF.33018.4"; tss_id "TSS22776"; |
| chr15 | Cufflinks exon89911330 | 89911466 | . | + | . | gene_id "XLOC_018074"; transcript_id "TCONS_00030109"; exon_number "1"; oId "CUFF.33018.3"; tss_id "TSS22776"; |
| chr15 | Cufflinks exon89912451 | 89912588 | . | + | . | gene_id "XLOC_018074"; transcript_id "TCONS_00030109"; exon_number "2"; oId "CUFF.33018.3"; tss_id "TSS22776"; |
| chr15 | Cufflinks exon89931048 | 89931112 | . | + | . | gene_id "XLOC_018074"; transcript_id "TCONS_00030109"; exon_number "3"; oId "CUFF.33018.3"; tss_id "TSS22776"; |
| chr15 | Cufflinks exon89932576 | 89932713 | . | + | . | gene_id "XLOC_018074"; transcript_id "TCONS_00030109"; exon_number "4"; oId "CUFF.33018.3"; tss_id "TSS22776"; |
| chr15 | Cufflinks exon89938259 | 89941719 | . | + | . | gene_id "XLOC_018074"; transcript_id "TCONS_00030109"; exon_number "5"; oId "CUFF.33018.3"; tss_id "TSS22776"; |
| chr15 | Cufflinks exon89911330 | 89911466 | . | + | . | gene_id "XLOC_018074"; transcript_id "TCONS_00030108"; exon_number "1"; oId "CUFF.33018.2"; tss_id "TSS22776"; |
| chr15 | Cufflinks exon89921273 | 89921396 | . | + | . | gene_id "XLOC_018074"; transcript_id "TCONS_00030108"; exon_number "2"; oId "CUFF.33018.2"; tss_id "TSS22776"; |
| chr15 | Cufflinks exon89930662 | 89930769 | . | + | . | gene_id "XLOC_018074"; transcript_id "TCONS_00030108"; exon_number "3"; oId "CUFF.33018.2"; tss_id "TSS22776"; |
| chr15 | Cufflinks exon89931048 | 89931112 | . | + | . | gene_id "XLOC_018074"; transcript_id "TCONS_00030108"; exon_number "4"; oId "CUFF.33018.2"; tss_id "TSS22776"; |
| chr15 | Cufflinks exon89931732 | 89931812 | . | + | . | gene_id "XLOC_018074"; transcript_id "TCONS_00030108"; exon_number "5"; oId "CUFF.33018.2"; tss_id "TSS22776"; |
| chr15 | Cufflinks exon89932576 | 89932713 | . | + | . | gene_id "XLOC_018074"; transcript_id "TCONS_00030108"; exon_number "6"; oId "CUFF.33018.2"; tss_id "TSS22776"; |
| chr15 | Cufflinks exon89938259 | 89941719 | . | + | . | gene_id "XLOC_018074"; transcript_id "TCONS_00030108"; exon_number "7"; oId "CUFF.33018.2"; tss_id "TSS22776"; |
| chr15 | Cufflinks exon91203465 | 91204055 | . | + | . | gene_id "XLOC_018111"; transcript_id "TCONS_00030163"; exon_number "1"; oId "CUFF.33119.2"; tss_id "TSS22819"; |
| chr15 | Cufflinks exon91207586 | 91208698 | . | + | . | gene_id "XLOC_018111"; transcript_id "TCONS_00030163"; exon_number                                             |

|                                              |   |   |   |                                                                    |  |  |
|----------------------------------------------|---|---|---|--------------------------------------------------------------------|--|--|
| "2"; oId "CUFF.33119.2"; tss_id "TSS22819";  |   |   |   |                                                                    |  |  |
| chr15 Cufflinks exon91203465 91204055        | . | + | . | gene_id "XLOC_018111"; transcript_id "TCONS_00030162"; exon_number |  |  |
| "1"; oId "CUFF.33119.1"; tss_id "TSS22819";  |   |   |   |                                                                    |  |  |
| chr15 Cufflinks exon91204624 91204714        | . | + | . | gene_id "XLOC_018111"; transcript_id "TCONS_00030162"; exon_number |  |  |
| "2"; oId "CUFF.33119.1"; tss_id "TSS22819";  |   |   |   |                                                                    |  |  |
| chr15 Cufflinks exon91207586 91208698        | . | + | . | gene_id "XLOC_018111"; transcript_id "TCONS_00030162"; exon_number |  |  |
| "3"; oId "CUFF.33119.1"; tss_id "TSS22819";  |   |   |   |                                                                    |  |  |
| chr15 Cufflinks exon91382922 91383130        | . | + | . | gene_id "XLOC_018117"; transcript_id "TCONS_00030170"; exon_number |  |  |
| "1"; oId "CUFF.33139.1"; tss_id "TSS22825";  |   |   |   |                                                                    |  |  |
| chr15 Cufflinks exon91384384 91384608        | . | + | . | gene_id "XLOC_018117"; transcript_id "TCONS_00030170"; exon_number |  |  |
| "2"; oId "CUFF.33139.1"; tss_id "TSS22825";  |   |   |   |                                                                    |  |  |
| chr15 Cufflinks exon93762941 93763013        | . | + | . | gene_id "XLOC_018146"; transcript_id "TCONS_00030220"; exon_number |  |  |
| "1"; oId "CUFF.33233.1"; tss_id "TSS22865";  |   |   |   |                                                                    |  |  |
| chr15 Cufflinks exon93771956 93772051        | . | + | . | gene_id "XLOC_018146"; transcript_id "TCONS_00030220"; exon_number |  |  |
| "2"; oId "CUFF.33233.1"; tss_id "TSS22865";  |   |   |   |                                                                    |  |  |
| chr15 Cufflinks exon93774957 93775081        | . | + | . | gene_id "XLOC_018146"; transcript_id "TCONS_00030220"; exon_number |  |  |
| "3"; oId "CUFF.33233.1"; tss_id "TSS22865";  |   |   |   |                                                                    |  |  |
| chr15 Cufflinks exon93822619 93822711        | . | + | . | gene_id "XLOC_018146"; transcript_id "TCONS_00030220"; exon_number |  |  |
| "4"; oId "CUFF.33233.1"; tss_id "TSS22865";  |   |   |   |                                                                    |  |  |
| chr15 Cufflinks exon93916739 93916814        | . | + | . | gene_id "XLOC_018146"; transcript_id "TCONS_00030220"; exon_number |  |  |
| "5"; oId "CUFF.33233.1"; tss_id "TSS22865";  |   |   |   |                                                                    |  |  |
| chr15 Cufflinks exon94026320 94026457        | . | + | . | gene_id "XLOC_018146"; transcript_id "TCONS_00030220"; exon_number |  |  |
| "6"; oId "CUFF.33233.1"; tss_id "TSS22865";  |   |   |   |                                                                    |  |  |
| chr15 Cufflinks exon94039463 94039560        | . | + | . | gene_id "XLOC_018146"; transcript_id "TCONS_00030220"; exon_number |  |  |
| "7"; oId "CUFF.33233.1"; tss_id "TSS22865";  |   |   |   |                                                                    |  |  |
| chr15 Cufflinks exon94041750 94041986        | . | + | . | gene_id "XLOC_018146"; transcript_id "TCONS_00030220"; exon_number |  |  |
| "8"; oId "CUFF.33233.1"; tss_id "TSS22865";  |   |   |   |                                                                    |  |  |
| chr15 Cufflinks exon94096834 94098303        | . | + | . | gene_id "XLOC_018146"; transcript_id "TCONS_00030220"; exon_number |  |  |
| "9"; oId "CUFF.33233.1"; tss_id "TSS22865";  |   |   |   |                                                                    |  |  |
| chr15 Cufflinks exon94100701 94100914        | . | + | . | gene_id "XLOC_018146"; transcript_id "TCONS_00030220"; exon_number |  |  |
| "10"; oId "CUFF.33233.1"; tss_id "TSS22865"; |   |   |   |                                                                    |  |  |
| chr15 Cufflinks exon94112667 94112749        | . | + | . | gene_id "XLOC_018146"; transcript_id "TCONS_00030220"; exon_number |  |  |
| "11"; oId "CUFF.33233.1"; tss_id "TSS22865"; |   |   |   |                                                                    |  |  |
| chr15 Cufflinks exon94131309 94131466        | . | + | . | gene_id "XLOC_018146"; transcript_id "TCONS_00030220"; exon_number |  |  |
| "12"; oId "CUFF.33233.1"; tss_id "TSS22865"; |   |   |   |                                                                    |  |  |
| chr15 Cufflinks exon94135811 94135962        | . | + | . | gene_id "XLOC_018146"; transcript_id "TCONS_00030220"; exon_number |  |  |
| "13"; oId "CUFF.33233.1"; tss_id "TSS22865"; |   |   |   |                                                                    |  |  |
| chr15 Cufflinks exon94136529 94136588        | . | + | . | gene_id "XLOC_018146"; transcript_id "TCONS_00030220"; exon_number |  |  |
| "14"; oId "CUFF.33233.1"; tss_id "TSS22865"; |   |   |   |                                                                    |  |  |
| chr15 Cufflinks exon94137790 94137885        | . | + | . | gene_id "XLOC_018146"; transcript_id "TCONS_00030220"; exon_number |  |  |
| "15"; oId "CUFF.33233.1"; tss_id "TSS22865"; |   |   |   |                                                                    |  |  |
| chr15 Cufflinks exon94303896 94303922        | . | + | . | gene_id "XLOC_018146"; transcript_id "TCONS_00030220"; exon_number |  |  |
| "16"; oId "CUFF.33233.1"; tss_id "TSS22865"; |   |   |   |                                                                    |  |  |

|       |                |          |          |   |   |   |                                                                                                                |
|-------|----------------|----------|----------|---|---|---|----------------------------------------------------------------------------------------------------------------|
| chr15 | Cufflinks exon | 93775012 | 93775081 | . | + | . | gene_id "XLOC_018146"; transcript_id "TCONS_00030221"; exon_number "1"; oId "CUFF.33233.4"; tss_id "TSS22866"; |
| chr15 | Cufflinks exon | 93865452 | 93865575 | . | + | . | gene_id "XLOC_018146"; transcript_id "TCONS_00030221"; exon_number "2"; oId "CUFF.33233.4"; tss_id "TSS22866"; |
| chr15 | Cufflinks exon | 93916739 | 93916814 | . | + | . | gene_id "XLOC_018146"; transcript_id "TCONS_00030221"; exon_number "3"; oId "CUFF.33233.4"; tss_id "TSS22866"; |
| chr15 | Cufflinks exon | 94026320 | 94026457 | . | + | . | gene_id "XLOC_018146"; transcript_id "TCONS_00030221"; exon_number "4"; oId "CUFF.33233.4"; tss_id "TSS22866"; |
| chr15 | Cufflinks exon | 94039463 | 94039560 | . | + | . | gene_id "XLOC_018146"; transcript_id "TCONS_00030221"; exon_number "5"; oId "CUFF.33233.4"; tss_id "TSS22866"; |
| chr15 | Cufflinks exon | 94041750 | 94045191 | . | + | . | gene_id "XLOC_018146"; transcript_id "TCONS_00030221"; exon_number "6"; oId "CUFF.33233.4"; tss_id "TSS22866"; |
| chr15 | Cufflinks exon | 93775012 | 93775081 | . | + | . | gene_id "XLOC_018146"; transcript_id "TCONS_00030222"; exon_number "1"; oId "CUFF.33233.5"; tss_id "TSS22866"; |
| chr15 | Cufflinks exon | 93865452 | 93865575 | . | + | . | gene_id "XLOC_018146"; transcript_id "TCONS_00030222"; exon_number "2"; oId "CUFF.33233.5"; tss_id "TSS22866"; |
| chr15 | Cufflinks exon | 93916739 | 93916814 | . | + | . | gene_id "XLOC_018146"; transcript_id "TCONS_00030222"; exon_number "3"; oId "CUFF.33233.5"; tss_id "TSS22866"; |
| chr15 | Cufflinks exon | 94073466 | 94073666 | . | + | . | gene_id "XLOC_018146"; transcript_id "TCONS_00030222"; exon_number "4"; oId "CUFF.33233.5"; tss_id "TSS22866"; |
| chr15 | Cufflinks exon | 94076002 | 94076202 | . | + | . | gene_id "XLOC_018146"; transcript_id "TCONS_00030222"; exon_number "5"; oId "CUFF.33233.5"; tss_id "TSS22866"; |
| chr15 | Cufflinks exon | 94084153 | 94085270 | . | + | . | gene_id "XLOC_018146"; transcript_id "TCONS_00030222"; exon_number "6"; oId "CUFF.33233.5"; tss_id "TSS22866"; |
| chr15 | Cufflinks exon | 93866864 | 93866911 | . | + | . | gene_id "XLOC_018146"; transcript_id "TCONS_00030241"; exon_number "1"; oId "CUFF.33233.6"; tss_id "TSS22867"; |
| chr15 | Cufflinks exon | 93916739 | 93916814 | . | + | . | gene_id "XLOC_018146"; transcript_id "TCONS_00030241"; exon_number "2"; oId "CUFF.33233.6"; tss_id "TSS22867"; |
| chr15 | Cufflinks exon | 94039463 | 94039560 | . | + | . | gene_id "XLOC_018146"; transcript_id "TCONS_00030241"; exon_number "3"; oId "CUFF.33233.6"; tss_id "TSS22867"; |
| chr15 | Cufflinks exon | 94041750 | 94045191 | . | + | . | gene_id "XLOC_018146"; transcript_id "TCONS_00030241"; exon_number "4"; oId "CUFF.33233.6"; tss_id "TSS22867"; |
| chr15 | Cufflinks exon | 94026322 | 94026457 | . | + | . | gene_id "XLOC_018146"; transcript_id "TCONS_00030280"; exon_number "1"; oId "CUFF.33233.7"; tss_id "TSS22868"; |
| chr15 | Cufflinks exon | 94041750 | 94045191 | . | + | . | gene_id "XLOC_018146"; transcript_id "TCONS_00030280"; exon_number "2"; oId "CUFF.33233.7"; tss_id "TSS22868"; |
| chr15 | Cufflinks exon | 94026397 | 94026457 | . | + | . | gene_id "XLOC_018146"; transcript_id "TCONS_00030281"; exon_number "1"; oId "CUFF.33233.8"; tss_id "TSS22868"; |
| chr15 | Cufflinks exon | 94073466 | 94073666 | . | + | . | gene_id "XLOC_018146"; transcript_id "TCONS_00030281"; exon_number "2"; oId "CUFF.33233.8"; tss_id "TSS22868"; |
| chr15 | Cufflinks exon | 94076002 | 94076202 | . | + | . | gene_id "XLOC_018146"; transcript_id "TCONS_00030281"; exon_number "3"; oId "CUFF.33233.8"; tss_id "TSS22868"; |
| chr15 | Cufflinks exon | 94084153 | 94085270 | . | + | . | gene_id "XLOC_018146"; transcript_id "TCONS_00030281"; exon_number "4"; oId "CUFF.33233.8"; tss_id "TSS22868"; |

"4"; oId "CUFF.33233.8"; tss\_id "TSS22868";  
chr15 Cufflinks exon94135986 94136588 . + . gene\_id "XLOC\_018146"; transcript\_id "TCONS\_00030305"; exon\_number  
"1"; oId "CUFF.33233.13"; tss\_id "TSS22871";  
chr15 Cufflinks exon94341999 94342078 . + . gene\_id "XLOC\_018146"; transcript\_id "TCONS\_00030305"; exon\_number  
"2"; oId "CUFF.33233.13"; tss\_id "TSS22871";  
chr15 Cufflinks exon93804939 93805108 . + . gene\_id "XLOC\_018148"; transcript\_id "TCONS\_00030224"; exon\_number  
"1"; oId "CUFF.33237.1"; tss\_id "TSS22873";  
chr15 Cufflinks exon93807841 93809803 . + . gene\_id "XLOC\_018148"; transcript\_id "TCONS\_00030224"; exon\_number  
"2"; oId "CUFF.33237.1"; tss\_id "TSS22873";  
chr15 Cufflinks exon98957485 98958410 . + . gene\_id "XLOC\_018279"; transcript\_id "TCONS\_00030371"; exon\_number  
"1"; oId "CUFF.33451.2"; tss\_id "TSS23010";  
chr15 Cufflinks exon98960641 98962246 . + . gene\_id "XLOC\_018279"; transcript\_id "TCONS\_00030371"; exon\_number  
"2"; oId "CUFF.33451.2"; tss\_id "TSS23010";  
chr15 Cufflinks exon99557933 99558042 . + . gene\_id "XLOC\_018283"; transcript\_id "TCONS\_00030376"; exon\_number  
"1"; oId "CUFF.33475.2"; tss\_id "TSS23014";  
chr15 Cufflinks exon99567829 99567902 . + . gene\_id "XLOC\_018283"; transcript\_id "TCONS\_00030376"; exon\_number  
"2"; oId "CUFF.33475.2"; tss\_id "TSS23014";  
chr15 Cufflinks exon99569713 99574275 . + . gene\_id "XLOC\_018283"; transcript\_id "TCONS\_00030376"; exon\_number  
"3"; oId "CUFF.33475.2"; tss\_id "TSS23014";  
chr15 Cufflinks exon99557933 99558042 . + . gene\_id "XLOC\_018283"; transcript\_id "TCONS\_00030380"; exon\_number  
"1"; oId "CUFF.33475.5"; tss\_id "TSS23014";  
chr15 Cufflinks exon99567829 99567902 . + . gene\_id "XLOC\_018283"; transcript\_id "TCONS\_00030380"; exon\_number  
"2"; oId "CUFF.33475.5"; tss\_id "TSS23014";  
chr15 Cufflinks exon99570794 99574332 . + . gene\_id "XLOC\_018283"; transcript\_id "TCONS\_00030380"; exon\_number  
"3"; oId "CUFF.33475.5"; tss\_id "TSS23014";  
chr15 Cufflinks exon99586056 99587509 . + . gene\_id "XLOC\_018283"; transcript\_id "TCONS\_00030380"; exon\_number  
"4"; oId "CUFF.33475.5"; tss\_id "TSS23014";  
chr15 Cufflinks exon99557933 99558042 . + . gene\_id "XLOC\_018283"; transcript\_id "TCONS\_00030379"; exon\_number  
"1"; oId "CUFF.33475.4"; tss\_id "TSS23014";  
chr15 Cufflinks exon99567829 99568075 . + . gene\_id "XLOC\_018283"; transcript\_id "TCONS\_00030379"; exon\_number  
"2"; oId "CUFF.33475.4"; tss\_id "TSS23014";  
chr15 Cufflinks exon99568807 99569807 . + . gene\_id "XLOC\_018283"; transcript\_id "TCONS\_00030379"; exon\_number  
"3"; oId "CUFF.33475.4"; tss\_id "TSS23014";  
chr15 Cufflinks exon99570091 99571018 . + . gene\_id "XLOC\_018283"; transcript\_id "TCONS\_00030379"; exon\_number  
"4"; oId "CUFF.33475.4"; tss\_id "TSS23014";  
chr15 Cufflinks exon99571103 99574332 . + . gene\_id "XLOC\_018283"; transcript\_id "TCONS\_00030379"; exon\_number  
"5"; oId "CUFF.33475.4"; tss\_id "TSS23014";  
chr15 Cufflinks exon99586056 99587509 . + . gene\_id "XLOC\_018283"; transcript\_id "TCONS\_00030379"; exon\_number  
"6"; oId "CUFF.33475.4"; tss\_id "TSS23014";  
chr15 Cufflinks exon99557933 99558042 . + . gene\_id "XLOC\_018283"; transcript\_id "TCONS\_00030378"; exon\_number  
"1"; oId "CUFF.33475.3"; tss\_id "TSS23014";  
chr15 Cufflinks exon99567829 99574332 . + . gene\_id "XLOC\_018283"; transcript\_id "TCONS\_00030378"; exon\_number  
"2"; oId "CUFF.33475.3"; tss\_id "TSS23014";

|       |                |           |           |   |   |   |                                                                                                                |
|-------|----------------|-----------|-----------|---|---|---|----------------------------------------------------------------------------------------------------------------|
| chr15 | Cufflinks exon | 99586056  | 99587509  | . | + | . | gene_id "XLOC_018283"; transcript_id "TCONS_00030378"; exon_number "3"; oId "CUFF.33475.3"; tss_id "TSS23014"; |
| chr15 | Cufflinks exon | 99557933  | 99558042  | . | + | . | gene_id "XLOC_018283"; transcript_id "TCONS_00030377"; exon_number "1"; oId "CUFF.33475.1"; tss_id "TSS23014"; |
| chr15 | Cufflinks exon | 99567829  | 99571792  | . | + | . | gene_id "XLOC_018283"; transcript_id "TCONS_00030377"; exon_number "2"; oId "CUFF.33475.1"; tss_id "TSS23014"; |
| chr15 | Cufflinks exon | 99571818  | 99574332  | . | + | . | gene_id "XLOC_018283"; transcript_id "TCONS_00030377"; exon_number "3"; oId "CUFF.33475.1"; tss_id "TSS23014"; |
| chr15 | Cufflinks exon | 99586664  | 99587509  | . | + | . | gene_id "XLOC_018283"; transcript_id "TCONS_00030377"; exon_number "4"; oId "CUFF.33475.1"; tss_id "TSS23014"; |
| chr15 | Cufflinks exon | 99567070  | 99571018  | . | + | . | gene_id "XLOC_018283"; transcript_id "TCONS_00030385"; exon_number "1"; oId "CUFF.33475.6"; tss_id "TSS23015"; |
| chr15 | Cufflinks exon | 99572476  | 99574275  | . | + | . | gene_id "XLOC_018283"; transcript_id "TCONS_00030385"; exon_number "2"; oId "CUFF.33475.6"; tss_id "TSS23015"; |
| chr15 | Cufflinks exon | 99567456  | 99574332  | . | + | . | gene_id "XLOC_018283"; transcript_id "TCONS_00030386"; exon_number "1"; oId "CUFF.33475.7"; tss_id "TSS23016"; |
| chr15 | Cufflinks exon | 99586056  | 99587509  | . | + | . | gene_id "XLOC_018283"; transcript_id "TCONS_00030386"; exon_number "2"; oId "CUFF.33475.7"; tss_id "TSS23016"; |
| chr15 | Cufflinks exon | 101392269 | 101395553 | . | + | . | gene_id "XLOC_018323"; transcript_id "TCONS_00030429"; exon_number "1"; oId "CUFF.33590.1"; tss_id "TSS23058"; |
| chr15 | Cufflinks exon | 101400005 | 101400240 | . | + | . | gene_id "XLOC_018323"; transcript_id "TCONS_00030429"; exon_number "2"; oId "CUFF.33590.1"; tss_id "TSS23058"; |
| chr15 | Cufflinks exon | 101400361 | 101402619 | . | + | . | gene_id "XLOC_018323"; transcript_id "TCONS_00030429"; exon_number "3"; oId "CUFF.33590.1"; tss_id "TSS23058"; |
| chr15 | Cufflinks exon | 101393620 | 101395553 | . | + | . | gene_id "XLOC_018323"; transcript_id "TCONS_00030431"; exon_number "1"; oId "CUFF.33590.3"; tss_id "TSS23059"; |
| chr15 | Cufflinks exon | 101396195 | 101396389 | . | + | . | gene_id "XLOC_018323"; transcript_id "TCONS_00030431"; exon_number "2"; oId "CUFF.33590.3"; tss_id "TSS23059"; |
| chr15 | Cufflinks exon | 21907641  | 21911394  | . | - | . | gene_id "XLOC_018355"; transcript_id "TCONS_00030483"; exon_number "1"; oId "CUFF.30106.3"; tss_id "TSS23098"; |
| chr15 | Cufflinks exon | 21912264  | 21912380  | . | - | . | gene_id "XLOC_018355"; transcript_id "TCONS_00030483"; exon_number "2"; oId "CUFF.30106.3"; tss_id "TSS23098"; |
| chr15 | Cufflinks exon | 21913679  | 21914167  | . | - | . | gene_id "XLOC_018355"; transcript_id "TCONS_00030483"; exon_number "3"; oId "CUFF.30106.3"; tss_id "TSS23098"; |
| chr15 | Cufflinks exon | 21907641  | 21911389  | . | - | . | gene_id "XLOC_018355"; transcript_id "TCONS_00030484"; exon_number "1"; oId "CUFF.30106.1"; tss_id "TSS23099"; |
| chr15 | Cufflinks exon | 21912264  | 21912380  | . | - | . | gene_id "XLOC_018355"; transcript_id "TCONS_00030484"; exon_number "2"; oId "CUFF.30106.1"; tss_id "TSS23099"; |
| chr15 | Cufflinks exon | 21913679  | 21913834  | . | - | . | gene_id "XLOC_018355"; transcript_id "TCONS_00030484"; exon_number "3"; oId "CUFF.30106.1"; tss_id "TSS23099"; |
| chr15 | Cufflinks exon | 21916043  | 21916747  | . | - | . | gene_id "XLOC_018355"; transcript_id "TCONS_00030484"; exon_number "4"; oId "CUFF.30106.1"; tss_id "TSS23099"; |
| chr15 | Cufflinks exon | 21907641  | 21911394  | . | - | . | gene_id "XLOC_018355"; transcript_id "TCONS_00030485"; exon_number                                             |

|                                                         |   |   |   |                                                                    |  |
|---------------------------------------------------------|---|---|---|--------------------------------------------------------------------|--|
| "1"; oId "CUFF.30106.2"; tss_id "TSS23100";             |   |   |   |                                                                    |  |
| chr15 Cufflinks exon21913679 21913834                   | . | - | . | gene_id "XLOC_018355"; transcript_id "TCONS_00030485"; exon_number |  |
| "2"; oId "CUFF.30106.2"; tss_id "TSS23100";             |   |   |   |                                                                    |  |
| chr15 Cufflinks exon21916043 21925554                   | . | - | . | gene_id "XLOC_018355"; transcript_id "TCONS_00030485"; exon_number |  |
| "3"; oId "CUFF.30106.2"; tss_id "TSS23100";             |   |   |   |                                                                    |  |
| chr15 Cufflinks exon30879977 30880057                   | . | - | . | gene_id "XLOC_018418"; transcript_id "TCONS_00030603"; exon_number |  |
| "1"; oId "CUFF.30430.1"; tss_id "TSS23194";             |   |   |   |                                                                    |  |
| chr15 Cufflinks exon30900421 30900527                   | . | - | . | gene_id "XLOC_018418"; transcript_id "TCONS_00030603"; exon_number |  |
| "2"; oId "CUFF.30430.1"; tss_id "TSS23194";             |   |   |   |                                                                    |  |
| chr15 Cufflinks exon30917254 30917971                   | . | - | . | gene_id "XLOC_018418"; transcript_id "TCONS_00030603"; exon_number |  |
| "3"; oId "CUFF.30430.1"; tss_id "TSS23194";             |   |   |   |                                                                    |  |
| chr15 Cufflinks exon30899906 30900527                   | . | - | . | gene_id "XLOC_018418"; transcript_id "TCONS_00030606"; exon_number |  |
| "1"; oId "CUFF.30430.3"; tss_id "TSS23195";             |   |   |   |                                                                    |  |
| chr15 Cufflinks exon30905894 30905990                   | . | - | . | gene_id "XLOC_018418"; transcript_id "TCONS_00030606"; exon_number |  |
| "2"; oId "CUFF.30430.3"; tss_id "TSS23195";             |   |   |   |                                                                    |  |
| chr15 Cufflinks exon30906611 30906743                   | . | - | . | gene_id "XLOC_018418"; transcript_id "TCONS_00030606"; exon_number |  |
| "3"; oId "CUFF.30430.3"; tss_id "TSS23195";             |   |   |   |                                                                    |  |
| chr15 Cufflinks exon30909307 30909364                   | . | - | . | gene_id "XLOC_018418"; transcript_id "TCONS_00030606"; exon_number |  |
| "4"; oId "CUFF.30430.3"; tss_id "TSS23195";             |   |   |   |                                                                    |  |
| chr15 Cufflinks exon30917470 30918140                   | . | - | . | gene_id "XLOC_018418"; transcript_id "TCONS_00030606"; exon_number |  |
| "5"; oId "CUFF.30430.3"; tss_id "TSS23195";             |   |   |   |                                                                    |  |
| chr15 Cufflinks exon30901583 30902255                   | . | - | . | gene_id "XLOC_018418"; transcript_id "TCONS_00030608"; exon_number |  |
| "1"; oId "CUFF.30430.5"; tss_id "TSS23195";             |   |   |   |                                                                    |  |
| chr15 Cufflinks exon30903386 30903472                   | . | - | . | gene_id "XLOC_018418"; transcript_id "TCONS_00030608"; exon_number |  |
| "2"; oId "CUFF.30430.5"; tss_id "TSS23195";             |   |   |   |                                                                    |  |
| chr15 Cufflinks exon30905894 30905990                   | . | - | . | gene_id "XLOC_018418"; transcript_id "TCONS_00030608"; exon_number |  |
| "3"; oId "CUFF.30430.5"; tss_id "TSS23195";             |   |   |   |                                                                    |  |
| chr15 Cufflinks exon30906611 30906743                   | . | - | . | gene_id "XLOC_018418"; transcript_id "TCONS_00030608"; exon_number |  |
| "4"; oId "CUFF.30430.5"; tss_id "TSS23195";             |   |   |   |                                                                    |  |
| chr15 Cufflinks exon30909307 30909364                   | . | - | . | gene_id "XLOC_018418"; transcript_id "TCONS_00030608"; exon_number |  |
| "5"; oId "CUFF.30430.5"; tss_id "TSS23195";             |   |   |   |                                                                    |  |
| chr15 Cufflinks exon30917470 30918140                   | . | - | . | gene_id "XLOC_018418"; transcript_id "TCONS_00030608"; exon_number |  |
| "6"; oId "CUFF.30430.5"; tss_id "TSS23195";             |   |   |   |                                                                    |  |
| chr15 Cufflinks exon40985953 40986993                   | . | - | . | gene_id "XLOC_018547"; transcript_id "TCONS_00030823"; exon_number |  |
| "1"; oId "CUFF.30837.4"; tss_id "TSS23368";             |   |   |   |                                                                    |  |
| chr15 Cufflinks exon40987210 40987303                   | . | - | . | gene_id "XLOC_018547"; transcript_id "TCONS_00030823"; exon_number |  |
| "2"; oId "CUFF.30837.4"; tss_id "TSS23368";             |   |   |   |                                                                    |  |
| chr15 Cufflinks exon41240232 41241388                   | . | - | . | gene_id "XLOC_018561"; transcript_id "TCONS_00030845"; exon_number |  |
| "1"; oId "CUFF.30868.2"; tss_id "TSS23383";             |   |   |   |                                                                    |  |
| chr15 Cufflinks exon41245072 41245410                   | . | - | . | gene_id "XLOC_018561"; transcript_id "TCONS_00030845"; exon_number |  |
| "2"; oId "CUFF.30868.2"; tss_id "TSS23383";             |   |   |   |                                                                    |  |
| chr15 Cufflinks exon 41240232 41241388                  | . | - | . | gene_id "XLOC_018561"; transcript_id "TCONS_00030844";             |  |
| exon_number "1"; oId "CUFF.30868.1"; tss_id "TSS23383"; |   |   |   |                                                                    |  |

chr15 Cufflinks exon 41245313 41245410 . - . gene\_id "XLOC\_018561"; transcript\_id "TCONS\_00030844";  
 exon\_number "2"; oId "CUFF.30868.1"; tss\_id "TSS23383";  
 chr15 Cufflinks exon 41240232 41241388 . - . gene\_id "XLOC\_018561"; transcript\_id "TCONS\_00030846";  
 exon\_number "1"; oId "CUFF.30868.3"; tss\_id "TSS23383";  
 chr15 Cufflinks exon 41244824 41245429 . - . gene\_id "XLOC\_018561"; transcript\_id "TCONS\_00030846";  
 exon\_number "2"; oId "CUFF.30868.3"; tss\_id "TSS23383";  
 chr15 Cufflinks exon 43992678 43992698 . - . gene\_id "XLOC\_018610"; transcript\_id "TCONS\_00030942";  
 exon\_number "1"; oId "CUFF.31020.1"; tss\_id "TSS23451";  
 chr15 Cufflinks exon 43992888 43993030 . - . gene\_id "XLOC\_018610"; transcript\_id "TCONS\_00030942";  
 exon\_number "2"; oId "CUFF.31020.1"; tss\_id "TSS23451";  
 chr15 Cufflinks exon 43993412 43993567 . - . gene\_id "XLOC\_018610"; transcript\_id "TCONS\_00030942";  
 exon\_number "3"; oId "CUFF.31020.1"; tss\_id "TSS23451";  
 chr15 Cufflinks exon 43995674 43995826 . - . gene\_id "XLOC\_018610"; transcript\_id "TCONS\_00030942";  
 exon\_number "4"; oId "CUFF.31020.1"; tss\_id "TSS23451";  
 chr15 Cufflinks exon 43994710 43995831 . - . gene\_id "XLOC\_018610"; transcript\_id "TCONS\_00030943";  
 exon\_number "1"; oId "CUFF.31020.2"; tss\_id "TSS23452";  
 chr15 Cufflinks exon43996940 43996993 . - . gene\_id "XLOC\_018610"; transcript\_id "TCONS\_00030943"; exon\_number  
 "2"; oId "CUFF.31020.2"; tss\_id "TSS23452";  
 chr15 Cufflinks exon44826269 44827672 . - . gene\_id "XLOC\_018641"; transcript\_id "TCONS\_00030982"; exon\_number  
 "1"; oId "CUFF.31109.4"; tss\_id "TSS23484";  
 chr15 Cufflinks exon44827958 44829121 . - . gene\_id "XLOC\_018641"; transcript\_id "TCONS\_00030982"; exon\_number  
 "2"; oId "CUFF.31109.4"; tss\_id "TSS23484";  
 chr15 Cufflinks exon44826269 44827672 . - . gene\_id "XLOC\_018641"; transcript\_id "TCONS\_00030981"; exon\_number  
 "1"; oId "CUFF.31109.3"; tss\_id "TSS23484";  
 chr15 Cufflinks exon44828241 44829121 . - . gene\_id "XLOC\_018641"; transcript\_id "TCONS\_00030981"; exon\_number  
 "2"; oId "CUFF.31109.3"; tss\_id "TSS23484";  
 chr15 Cufflinks exon49016768 49019350 . - . gene\_id "XLOC\_018691"; transcript\_id "TCONS\_00031068"; exon\_number  
 "1"; oId "CUFF.31234.2"; tss\_id "TSS23549";  
 chr15 Cufflinks exon49020047 49020099 . - . gene\_id "XLOC\_018691"; transcript\_id "TCONS\_00031068"; exon\_number  
 "2"; oId "CUFF.31234.2"; tss\_id "TSS23549";  
 chr15 Cufflinks exon49016768 49021383 . - . gene\_id "XLOC\_018691"; transcript\_id "TCONS\_00031069"; exon\_number  
 "1"; oId "CUFF.31234.1"; tss\_id "TSS23550";  
 chr15 Cufflinks exon49021609 49021737 . - . gene\_id "XLOC\_018691"; transcript\_id "TCONS\_00031069"; exon\_number  
 "2"; oId "CUFF.31234.1"; tss\_id "TSS23550";  
 chr15 Cufflinks exon52211054 52211340 . - . gene\_id "XLOC\_018723"; transcript\_id "TCONS\_00031145"; exon\_number  
 "1"; oId "CUFF.31372.1"; tss\_id "TSS23596";  
 chr15 Cufflinks exon52214913 52215105 . - . gene\_id "XLOC\_018723"; transcript\_id "TCONS\_00031145"; exon\_number  
 "2"; oId "CUFF.31372.1"; tss\_id "TSS23596";  
 chr15 Cufflinks exon52216237 52216317 . - . gene\_id "XLOC\_018723"; transcript\_id "TCONS\_00031145"; exon\_number  
 "3"; oId "CUFF.31372.1"; tss\_id "TSS23596";  
 chr15 Cufflinks exon52211054 52211340 . - . gene\_id "XLOC\_018723"; transcript\_id "TCONS\_00031147"; exon\_number  
 "1"; oId "CUFF.31372.3"; tss\_id "TSS23597";  
 chr15 Cufflinks exon52214922 52215105 . - . gene\_id "XLOC\_018723"; transcript\_id "TCONS\_00031147"; exon\_number

"2"; oId "CUFF.31372.3"; tss\_id "TSS23597";  
chr15 Cufflinks exon52216237 52216375 . - . gene\_id "XLOC\_018723"; transcript\_id "TCONS\_00031147"; exon\_number  
"3"; oId "CUFF.31372.3"; tss\_id "TSS23597";  
chr15 Cufflinks exon52217942 52218076 . - . gene\_id "XLOC\_018723"; transcript\_id "TCONS\_00031147"; exon\_number  
"4"; oId "CUFF.31372.3"; tss\_id "TSS23597";  
chr15 Cufflinks exon52218975 52219069 . - . gene\_id "XLOC\_018723"; transcript\_id "TCONS\_00031147"; exon\_number  
"5"; oId "CUFF.31372.3"; tss\_id "TSS23597";  
chr15 Cufflinks exon52220406 52220490 . - . gene\_id "XLOC\_018723"; transcript\_id "TCONS\_00031147"; exon\_number  
"6"; oId "CUFF.31372.3"; tss\_id "TSS23597";  
chr15 Cufflinks exon52221530 52221675 . - . gene\_id "XLOC\_018723"; transcript\_id "TCONS\_00031147"; exon\_number  
"7"; oId "CUFF.31372.3"; tss\_id "TSS23597";  
chr15 Cufflinks exon52222726 52222820 . - . gene\_id "XLOC\_018723"; transcript\_id "TCONS\_00031147"; exon\_number  
"8"; oId "CUFF.31372.3"; tss\_id "TSS23597";  
chr15 Cufflinks exon52228231 52228344 . - . gene\_id "XLOC\_018723"; transcript\_id "TCONS\_00031147"; exon\_number  
"9"; oId "CUFF.31372.3"; tss\_id "TSS23597";  
chr15 Cufflinks exon52211054 52211340 . - . gene\_id "XLOC\_018723"; transcript\_id "TCONS\_00031146"; exon\_number  
"1"; oId "CUFF.31372.2"; tss\_id "TSS23597";  
chr15 Cufflinks exon52214979 52215105 . - . gene\_id "XLOC\_018723"; transcript\_id "TCONS\_00031146"; exon\_number  
"2"; oId "CUFF.31372.2"; tss\_id "TSS23597";  
chr15 Cufflinks exon52216237 52216375 . - . gene\_id "XLOC\_018723"; transcript\_id "TCONS\_00031146"; exon\_number  
"3"; oId "CUFF.31372.2"; tss\_id "TSS23597";  
chr15 Cufflinks exon52217942 52218076 . - . gene\_id "XLOC\_018723"; transcript\_id "TCONS\_00031146"; exon\_number  
"4"; oId "CUFF.31372.2"; tss\_id "TSS23597";  
chr15 Cufflinks exon52218975 52219069 . - . gene\_id "XLOC\_018723"; transcript\_id "TCONS\_00031146"; exon\_number  
"5"; oId "CUFF.31372.2"; tss\_id "TSS23597";  
chr15 Cufflinks exon52221530 52221675 . - . gene\_id "XLOC\_018723"; transcript\_id "TCONS\_00031146"; exon\_number  
"6"; oId "CUFF.31372.2"; tss\_id "TSS23597";  
chr15 Cufflinks exon52222726 52222820 . - . gene\_id "XLOC\_018723"; transcript\_id "TCONS\_00031146"; exon\_number  
"7"; oId "CUFF.31372.2"; tss\_id "TSS23597";  
chr15 Cufflinks exon52228231 52228344 . - . gene\_id "XLOC\_018723"; transcript\_id "TCONS\_00031146"; exon\_number  
"8"; oId "CUFF.31372.2"; tss\_id "TSS23597";  
chr15 Cufflinks exon58635535 58636072 . - . gene\_id "XLOC\_018774"; transcript\_id "TCONS\_00031242"; exon\_number  
"1"; oId "CUFF.31551.2"; tss\_id "TSS23673";  
chr15 Cufflinks exon58650346 58650446 . - . gene\_id "XLOC\_018774"; transcript\_id "TCONS\_00031242"; exon\_number  
"2"; oId "CUFF.31551.2"; tss\_id "TSS23673";  
chr15 Cufflinks exon58635535 58636074 . - . gene\_id "XLOC\_018774"; transcript\_id "TCONS\_00031243"; exon\_number  
"1"; oId "CUFF.31551.3"; tss\_id "TSS23674";  
chr15 Cufflinks exon58712172 58712304 . - . gene\_id "XLOC\_018774"; transcript\_id "TCONS\_00031243"; exon\_number  
"2"; oId "CUFF.31551.3"; tss\_id "TSS23674";  
chr15 Cufflinks exon58764976 58769602 . - . gene\_id "XLOC\_018774"; transcript\_id "TCONS\_00031243"; exon\_number  
"3"; oId "CUFF.31551.3"; tss\_id "TSS23674";  
chr15 Cufflinks exon58645215 58649434 . - . gene\_id "XLOC\_018774"; transcript\_id "TCONS\_00031245"; exon\_number  
"1"; oId "CUFF.31551.4"; tss\_id "TSS23673";



|       |                        |          |   |   |   |                                                                                                                |
|-------|------------------------|----------|---|---|---|----------------------------------------------------------------------------------------------------------------|
| chr15 | Cufflinks exon58650346 | 58650446 | . | - | . | gene_id "XLOC_018774"; transcript_id "TCONS_00031245"; exon_number "2"; oId "CUFF.31551.4"; tss_id "TSS23673"; |
| chr15 | Cufflinks exon60101806 | 60104744 | . | - | . | gene_id "XLOC_018794"; transcript_id "TCONS_00031281"; exon_number "1"; oId "CUFF.31636.5"; tss_id "TSS23702"; |
| chr15 | Cufflinks exon60106520 | 60106769 | . | - | . | gene_id "XLOC_018794"; transcript_id "TCONS_00031281"; exon_number "2"; oId "CUFF.31636.5"; tss_id "TSS23702"; |
| chr15 | Cufflinks exon66670818 | 66672278 | . | - | . | gene_id "XLOC_018880"; transcript_id "TCONS_00031435"; exon_number "1"; oId "CUFF.31934.1"; tss_id "TSS23810"; |
| chr15 | Cufflinks exon66678945 | 66678980 | . | - | . | gene_id "XLOC_018880"; transcript_id "TCONS_00031435"; exon_number "2"; oId "CUFF.31934.1"; tss_id "TSS23810"; |
| chr15 | Cufflinks exon67695949 | 67700813 | . | - | . | gene_id "XLOC_018895"; transcript_id "TCONS_00031460"; exon_number "1"; oId "CUFF.31972.2"; tss_id "TSS23827"; |
| chr15 | Cufflinks exon67713673 | 67713836 | . | - | . | gene_id "XLOC_018895"; transcript_id "TCONS_00031460"; exon_number "2"; oId "CUFF.31972.2"; tss_id "TSS23827"; |
| chr15 | Cufflinks exon67752030 | 67752313 | . | - | . | gene_id "XLOC_018895"; transcript_id "TCONS_00031460"; exon_number "3"; oId "CUFF.31972.2"; tss_id "TSS23827"; |
| chr15 | Cufflinks exon67758832 | 67759076 | . | - | . | gene_id "XLOC_018895"; transcript_id "TCONS_00031460"; exon_number "4"; oId "CUFF.31972.2"; tss_id "TSS23827"; |
| chr15 | Cufflinks exon67811338 | 67811440 | . | - | . | gene_id "XLOC_018895"; transcript_id "TCONS_00031460"; exon_number "5"; oId "CUFF.31972.2"; tss_id "TSS23827"; |
| chr15 | Cufflinks exon67813884 | 67814182 | . | - | . | gene_id "XLOC_018895"; transcript_id "TCONS_00031460"; exon_number "6"; oId "CUFF.31972.2"; tss_id "TSS23827"; |
| chr15 | Cufflinks exon67695949 | 67700813 | . | - | . | gene_id "XLOC_018895"; transcript_id "TCONS_00031459"; exon_number "1"; oId "CUFF.31972.1"; tss_id "TSS23827"; |
| chr15 | Cufflinks exon67713673 | 67713836 | . | - | . | gene_id "XLOC_018895"; transcript_id "TCONS_00031459"; exon_number "2"; oId "CUFF.31972.1"; tss_id "TSS23827"; |
| chr15 | Cufflinks exon67722659 | 67722738 | . | - | . | gene_id "XLOC_018895"; transcript_id "TCONS_00031459"; exon_number "3"; oId "CUFF.31972.1"; tss_id "TSS23827"; |
| chr15 | Cufflinks exon67758832 | 67759049 | . | - | . | gene_id "XLOC_018895"; transcript_id "TCONS_00031459"; exon_number "4"; oId "CUFF.31972.1"; tss_id "TSS23827"; |
| chr15 | Cufflinks exon67811338 | 67811440 | . | - | . | gene_id "XLOC_018895"; transcript_id "TCONS_00031459"; exon_number "5"; oId "CUFF.31972.1"; tss_id "TSS23827"; |
| chr15 | Cufflinks exon67813857 | 67814182 | . | - | . | gene_id "XLOC_018895"; transcript_id "TCONS_00031459"; exon_number "6"; oId "CUFF.31972.1"; tss_id "TSS23827"; |
| chr15 | Cufflinks exon70821020 | 70821745 | . | - | . | gene_id "XLOC_018934"; transcript_id "TCONS_00031517"; exon_number "1"; oId "CUFF.32081.3"; tss_id "TSS23870"; |
| chr15 | Cufflinks exon70827776 | 70828116 | . | - | . | gene_id "XLOC_018934"; transcript_id "TCONS_00031517"; exon_number "2"; oId "CUFF.32081.3"; tss_id "TSS23870"; |
| chr15 | Cufflinks exon70821020 | 70821573 | . | - | . | gene_id "XLOC_018934"; transcript_id "TCONS_00031518"; exon_number "1"; oId "CUFF.32081.2"; tss_id "TSS23871"; |
| chr15 | Cufflinks exon70827776 | 70828237 | . | - | . | gene_id "XLOC_018934"; transcript_id "TCONS_00031518"; exon_number "2"; oId "CUFF.32081.2"; tss_id "TSS23871"; |
| chr15 | Cufflinks exon70825487 | 70827612 | . | - | . | gene_id "XLOC_018934"; transcript_id "TCONS_00031522"; exon_number                                             |

"1"; oId "CUFF.32081.4"; tss\_id "TSS23871";  
chr15 Cufflinks exon70827776 70828322 . - . gene\_id "XLOC\_018934"; transcript\_id "TCONS\_00031522"; exon\_number  
"2"; oId "CUFF.32081.4"; tss\_id "TSS23871";  
chr15 Cufflinks exon89439492 89441526 . - . gene\_id "XLOC\_019205"; transcript\_id "TCONS\_00032030"; exon\_number  
"1"; oId "CUFF.32995.2"; tss\_id "TSS24220";  
chr15 Cufflinks exon89447020 89447096 . - . gene\_id "XLOC\_019205"; transcript\_id "TCONS\_00032030"; exon\_number  
"2"; oId "CUFF.32995.2"; tss\_id "TSS24220";  
chr15 Cufflinks exon90617799 90626478 . - . gene\_id "XLOC\_019230"; transcript\_id "TCONS\_00032062"; exon\_number  
"1"; oId "CUFF.33076.1"; tss\_id "TSS24247";  
chr15 Cufflinks exon90737166 90737177 . - . gene\_id "XLOC\_019230"; transcript\_id "TCONS\_00032062"; exon\_number  
"2"; oId "CUFF.33076.1"; tss\_id "TSS24247";  
chr15 Cufflinks exon91944701 91946759 . - . gene\_id "XLOC\_019249"; transcript\_id "TCONS\_00032087"; exon\_number  
"1"; oId "CUFF.33165.2"; tss\_id "TSS24266";  
chr15 Cufflinks exon92012307 92012424 . - . gene\_id "XLOC\_019249"; transcript\_id "TCONS\_00032087"; exon\_number  
"2"; oId "CUFF.33165.2"; tss\_id "TSS24266";  
chr15 Cufflinks exon92012899 92013005 . - . gene\_id "XLOC\_019249"; transcript\_id "TCONS\_00032087"; exon\_number  
"3"; oId "CUFF.33165.2"; tss\_id "TSS24266";  
chr15 Cufflinks exon91944701 91946759 . - . gene\_id "XLOC\_019249"; transcript\_id "TCONS\_00032089"; exon\_number  
"1"; oId "CUFF.33165.3"; tss\_id "TSS24267";  
chr15 Cufflinks exon91966619 91966730 . - . gene\_id "XLOC\_019249"; transcript\_id "TCONS\_00032089"; exon\_number  
"2"; oId "CUFF.33165.3"; tss\_id "TSS24267";  
chr15 Cufflinks exon92012307 92012424 . - . gene\_id "XLOC\_019249"; transcript\_id "TCONS\_00032089"; exon\_number  
"3"; oId "CUFF.33165.3"; tss\_id "TSS24267";  
chr15 Cufflinks exon92012899 92013264 . - . gene\_id "XLOC\_019249"; transcript\_id "TCONS\_00032089"; exon\_number  
"4"; oId "CUFF.33165.3"; tss\_id "TSS24267";  
chr15 Cufflinks exon91944701 91946759 . - . gene\_id "XLOC\_019249"; transcript\_id "TCONS\_00032088"; exon\_number  
"1"; oId "CUFF.33165.1"; tss\_id "TSS24267";  
chr15 Cufflinks exon91952065 91952232 . - . gene\_id "XLOC\_019249"; transcript\_id "TCONS\_00032088"; exon\_number  
"2"; oId "CUFF.33165.1"; tss\_id "TSS24267";  
chr15 Cufflinks exon91966619 91966732 . - . gene\_id "XLOC\_019249"; transcript\_id "TCONS\_00032088"; exon\_number  
"3"; oId "CUFF.33165.1"; tss\_id "TSS24267";  
chr15 Cufflinks exon92012309 92012424 . - . gene\_id "XLOC\_019249"; transcript\_id "TCONS\_00032088"; exon\_number  
"4"; oId "CUFF.33165.1"; tss\_id "TSS24267";  
chr15 Cufflinks exon92012899 92013264 . - . gene\_id "XLOC\_019249"; transcript\_id "TCONS\_00032088"; exon\_number  
"5"; oId "CUFF.33165.1"; tss\_id "TSS24267";  
chr15 Cufflinks exon91980262 91980283 . - . gene\_id "XLOC\_019249"; transcript\_id "TCONS\_00032090"; exon\_number  
"1"; oId "CUFF.33165.4"; tss\_id "TSS24266";  
chr15 Cufflinks exon92012307 92012424 . - . gene\_id "XLOC\_019249"; transcript\_id "TCONS\_00032090"; exon\_number  
"2"; oId "CUFF.33165.4"; tss\_id "TSS24266";  
chr15 Cufflinks exon92012899 92013005 . - . gene\_id "XLOC\_019249"; transcript\_id "TCONS\_00032090"; exon\_number  
"3"; oId "CUFF.33165.4"; tss\_id "TSS24266";  
chr15 Cufflinks exon93351891 93352239 . - . gene\_id "XLOC\_019251"; transcript\_id "TCONS\_00032102"; exon\_number  
"1"; oId "CUFF.33185.10"; tss\_id "TSS24272";

|       |                |           |           |   |   |   |                                                                                                                 |
|-------|----------------|-----------|-----------|---|---|---|-----------------------------------------------------------------------------------------------------------------|
| chr15 | Cufflinks exon | 93352876  | 93353066  | . | - | . | gene_id "XLOC_019251"; transcript_id "TCONS_00032102"; exon_number "2"; oId "CUFF.33185.10"; tss_id "TSS24272"; |
| chr15 | Cufflinks exon | 100884662 | 100885832 | . | - | . | gene_id "XLOC_019305"; transcript_id "TCONS_00032183"; exon_number "1"; oId "CUFF.33584.4"; tss_id "TSS24338";  |
| chr15 | Cufflinks exon | 100888939 | 100890923 | . | - | . | gene_id "XLOC_019305"; transcript_id "TCONS_00032183"; exon_number "2"; oId "CUFF.33584.4"; tss_id "TSS24338";  |
| chr15 | Cufflinks exon | 100884662 | 100885832 | . | - | . | gene_id "XLOC_019305"; transcript_id "TCONS_00032182"; exon_number "1"; oId "CUFF.33584.3"; tss_id "TSS24338";  |
| chr15 | Cufflinks exon | 100888939 | 100889593 | . | - | . | gene_id "XLOC_019305"; transcript_id "TCONS_00032182"; exon_number "2"; oId "CUFF.33584.3"; tss_id "TSS24338";  |
| chr15 | Cufflinks exon | 100890127 | 100890923 | . | - | . | gene_id "XLOC_019305"; transcript_id "TCONS_00032182"; exon_number "3"; oId "CUFF.33584.3"; tss_id "TSS24338";  |
| chr16 | Cufflinks exon | 72916     | 73085     | . | + | . | gene_id "XLOC_019338"; transcript_id "TCONS_00032249"; exon_number "1"; oId "CUFF.33661.2"; tss_id "TSS24388";  |
| chr16 | Cufflinks exon | 74121     | 75112     | . | + | . | gene_id "XLOC_019338"; transcript_id "TCONS_00032249"; exon_number "2"; oId "CUFF.33661.2"; tss_id "TSS24388";  |
| chr16 | Cufflinks exon | 72916     | 73085     | . | + | . | gene_id "XLOC_019338"; transcript_id "TCONS_00032248"; exon_number "1"; oId "CUFF.33661.1"; tss_id "TSS24388";  |
| chr16 | Cufflinks exon | 74246     | 75112     | . | + | . | gene_id "XLOC_019338"; transcript_id "TCONS_00032248"; exon_number "2"; oId "CUFF.33661.1"; tss_id "TSS24388";  |
| chr16 | Cufflinks exon | 432176    | 432477    | . | + | . | gene_id "XLOC_019351"; transcript_id "TCONS_00032264"; exon_number "1"; oId "CUFF.33709.1"; tss_id "TSS24402";  |
| chr16 | Cufflinks exon | 433430    | 433628    | . | + | . | gene_id "XLOC_019351"; transcript_id "TCONS_00032264"; exon_number "2"; oId "CUFF.33709.1"; tss_id "TSS24402";  |
| chr16 | Cufflinks exon | 2014997   | 2015130   | . | + | . | gene_id "XLOC_019409"; transcript_id "TCONS_00032359"; exon_number "1"; oId "CUFF.33866.1"; tss_id "TSS24473";  |
| chr16 | Cufflinks exon | 2015407   | 2015505   | . | + | . | gene_id "XLOC_019409"; transcript_id "TCONS_00032359"; exon_number "2"; oId "CUFF.33866.1"; tss_id "TSS24473";  |
| chr16 | Cufflinks exon | 2318664   | 2318844   | . | + | . | gene_id "XLOC_019427"; transcript_id "TCONS_00032390"; exon_number "1"; oId "CUFF.33907.1"; tss_id "TSS24498";  |
| chr16 | Cufflinks exon | 2321677   | 2321892   | . | + | . | gene_id "XLOC_019427"; transcript_id "TCONS_00032390"; exon_number "2"; oId "CUFF.33907.1"; tss_id "TSS24498";  |
| chr16 | Cufflinks exon | 2322988   | 2323073   | . | + | . | gene_id "XLOC_019427"; transcript_id "TCONS_00032390"; exon_number "3"; oId "CUFF.33907.1"; tss_id "TSS24498";  |
| chr16 | Cufflinks exon | 11406740  | 11406794  | . | + | . | gene_id "XLOC_019564"; transcript_id "TCONS_00032611"; exon_number "1"; oId "CUFF.34334.3"; tss_id "TSS24660";  |
| chr16 | Cufflinks exon | 11409998  | 11410741  | . | + | . | gene_id "XLOC_019564"; transcript_id "TCONS_00032611"; exon_number "2"; oId "CUFF.34334.3"; tss_id "TSS24660";  |
| chr16 | Cufflinks exon | 11413453  | 11414441  | . | + | . | gene_id "XLOC_019564"; transcript_id "TCONS_00032611"; exon_number "3"; oId "CUFF.34334.3"; tss_id "TSS24660";  |
| chr16 | Cufflinks exon | 14396098  | 14396454  | . | + | . | gene_id "XLOC_019584"; transcript_id "TCONS_00032643"; exon_number "1"; oId "CUFF.34401.1"; tss_id "TSS24684";  |
| chr16 | Cufflinks exon | 14419408  | 14420391  | . | + | . | gene_id "XLOC_019584"; transcript_id "TCONS_00032643"; exon_number "2"; oId "CUFF.34401.1"; tss_id "TSS24684";  |

"2"; oId "CUFF.34401.1"; tss\_id "TSS24684";  
chr16 Cufflinks exon14396145 14396454 . + . gene\_id "XLOC\_019584"; transcript\_id "TCONS\_00032644"; exon\_number  
"1"; oId "CUFF.34401.2"; tss\_id "TSS24684";  
chr16 Cufflinks exon14419870 14420391 . + . gene\_id "XLOC\_019584"; transcript\_id "TCONS\_00032644"; exon\_number  
"2"; oId "CUFF.34401.2"; tss\_id "TSS24684";  
chr16 Cufflinks exon14396362 14396393 . + . gene\_id "XLOC\_019584"; transcript\_id "TCONS\_00032645"; exon\_number  
"1"; oId "CUFF.34401.3"; tss\_id "TSS24685";  
chr16 Cufflinks exon14419870 14420391 . + . gene\_id "XLOC\_019584"; transcript\_id "TCONS\_00032645"; exon\_number  
"2"; oId "CUFF.34401.3"; tss\_id "TSS24685";  
chr16 Cufflinks exon21312170 21312656 . + . gene\_id "XLOC\_019643"; transcript\_id "TCONS\_00032771"; exon\_number  
"1"; oId "CUFF.34624.4"; tss\_id "TSS24762";  
chr16 Cufflinks exon21326632 21326697 . + . gene\_id "XLOC\_019643"; transcript\_id "TCONS\_00032771"; exon\_number  
"2"; oId "CUFF.34624.4"; tss\_id "TSS24762";  
chr16 Cufflinks exon22255462 22255485 . + . gene\_id "XLOC\_019657"; transcript\_id "TCONS\_00032814"; exon\_number  
"1"; oId "CUFF.34738.1"; tss\_id "TSS24783";  
chr16 Cufflinks exon22488414 22488632 . + . gene\_id "XLOC\_019657"; transcript\_id "TCONS\_00032814"; exon\_number  
"2"; oId "CUFF.34738.1"; tss\_id "TSS24783";  
chr16 Cufflinks exon29875004 29875051 . + . gene\_id "XLOC\_019749"; transcript\_id "TCONS\_00032985"; exon\_number  
"1"; oId "CUFF.35159.1"; tss\_id "TSS24905";  
chr16 Cufflinks exon29875625 29875712 . + . gene\_id "XLOC\_019749"; transcript\_id "TCONS\_00032985"; exon\_number  
"2"; oId "CUFF.35159.1"; tss\_id "TSS24905";  
chr16 Cufflinks exon29876049 29876196 . + . gene\_id "XLOC\_019749"; transcript\_id "TCONS\_00032985"; exon\_number  
"3"; oId "CUFF.35159.1"; tss\_id "TSS24905";  
chr16 Cufflinks exon29876481 29876558 . + . gene\_id "XLOC\_019749"; transcript\_id "TCONS\_00032985"; exon\_number  
"4"; oId "CUFF.35159.1"; tss\_id "TSS24905";  
chr16 Cufflinks exon29876677 29876763 . + . gene\_id "XLOC\_019749"; transcript\_id "TCONS\_00032985"; exon\_number  
"5"; oId "CUFF.35159.1"; tss\_id "TSS24905";  
chr16 Cufflinks exon29879185 29879374 . + . gene\_id "XLOC\_019749"; transcript\_id "TCONS\_00032985"; exon\_number  
"6"; oId "CUFF.35159.1"; tss\_id "TSS24905";  
chr16 Cufflinks exon47071477 47071616 . + . gene\_id "XLOC\_019837"; transcript\_id "TCONS\_00033145"; exon\_number  
"1"; oId "CUFF.35535.1"; tss\_id "TSS25017";  
chr16 Cufflinks exon47072341 47072504 . + . gene\_id "XLOC\_019837"; transcript\_id "TCONS\_00033145"; exon\_number  
"2"; oId "CUFF.35535.1"; tss\_id "TSS25017";  
chr16 Cufflinks exon48255984 48256013 . + . gene\_id "XLOC\_019842"; transcript\_id "TCONS\_00033155"; exon\_number  
"1"; oId "CUFF.35553.1"; tss\_id "TSS25023";  
chr16 Cufflinks exon48388307 48390621 . + . gene\_id "XLOC\_019842"; transcript\_id "TCONS\_00033155"; exon\_number  
"2"; oId "CUFF.35553.1"; tss\_id "TSS25023";  
chr16 Cufflinks exon48395388 48396947 . + . gene\_id "XLOC\_019842"; transcript\_id "TCONS\_00033155"; exon\_number  
"3"; oId "CUFF.35553.1"; tss\_id "TSS25023";  
chr16 Cufflinks exon48655813 48655940 . + . gene\_id "XLOC\_019845"; transcript\_id "TCONS\_00033160"; exon\_number  
"1"; oId "CUFF.35562.1"; tss\_id "TSS25027";  
chr16 Cufflinks exon48657260 48657514 . + . gene\_id "XLOC\_019845"; transcript\_id "TCONS\_00033160"; exon\_number  
"2"; oId "CUFF.35562.1"; tss\_id "TSS25027";

|       |                        |          |   |   |   |                                                                                                                |
|-------|------------------------|----------|---|---|---|----------------------------------------------------------------------------------------------------------------|
| chr16 | Cufflinks exon48775194 | 48775313 | . | + | . | gene_id "XLOC_019845"; transcript_id "TCONS_00033160"; exon_number "3"; oId "CUFF.35562.1"; tss_id "TSS25027"; |
| chr16 | Cufflinks exon48778158 | 48778240 | . | + | . | gene_id "XLOC_019845"; transcript_id "TCONS_00033160"; exon_number "4"; oId "CUFF.35562.1"; tss_id "TSS25027"; |
| chr16 | Cufflinks exon48778378 | 48781162 | . | + | . | gene_id "XLOC_019845"; transcript_id "TCONS_00033160"; exon_number "5"; oId "CUFF.35562.1"; tss_id "TSS25027"; |
| chr16 | Cufflinks exon48801307 | 48801426 | . | + | . | gene_id "XLOC_019845"; transcript_id "TCONS_00033160"; exon_number "6"; oId "CUFF.35562.1"; tss_id "TSS25027"; |
| chr16 | Cufflinks exon48801688 | 48801737 | . | + | . | gene_id "XLOC_019845"; transcript_id "TCONS_00033160"; exon_number "7"; oId "CUFF.35562.1"; tss_id "TSS25027"; |
| chr16 | Cufflinks exon48657335 | 48657514 | . | + | . | gene_id "XLOC_019845"; transcript_id "TCONS_00033161"; exon_number "1"; oId "CUFF.35562.4"; tss_id "TSS25028"; |
| chr16 | Cufflinks exon48775194 | 48775313 | . | + | . | gene_id "XLOC_019845"; transcript_id "TCONS_00033161"; exon_number "2"; oId "CUFF.35562.4"; tss_id "TSS25028"; |
| chr16 | Cufflinks exon48778158 | 48778240 | . | + | . | gene_id "XLOC_019845"; transcript_id "TCONS_00033161"; exon_number "3"; oId "CUFF.35562.4"; tss_id "TSS25028"; |
| chr16 | Cufflinks exon48778378 | 48782234 | . | + | . | gene_id "XLOC_019845"; transcript_id "TCONS_00033161"; exon_number "4"; oId "CUFF.35562.4"; tss_id "TSS25028"; |
| chr16 | Cufflinks exon54319517 | 54319571 | . | + | . | gene_id "XLOC_019879"; transcript_id "TCONS_00033219"; exon_number "1"; oId "CUFF.35662.2"; tss_id "TSS25069"; |
| chr16 | Cufflinks exon54322473 | 54335947 | . | + | . | gene_id "XLOC_019879"; transcript_id "TCONS_00033219"; exon_number "2"; oId "CUFF.35662.2"; tss_id "TSS25069"; |
| chr16 | Cufflinks exon56696520 | 56696756 | . | + | . | gene_id "XLOC_019905"; transcript_id "TCONS_00033257"; exon_number "1"; oId "CUFF.35731.2"; tss_id "TSS25101"; |
| chr16 | Cufflinks exon56697083 | 56697498 | . | + | . | gene_id "XLOC_019905"; transcript_id "TCONS_00033257"; exon_number "2"; oId "CUFF.35731.2"; tss_id "TSS25101"; |
| chr16 | Cufflinks exon56696520 | 56696756 | . | + | . | gene_id "XLOC_019905"; transcript_id "TCONS_00033258"; exon_number "1"; oId "CUFF.35731.1"; tss_id "TSS25101"; |
| chr16 | Cufflinks exon56697500 | 56697612 | . | + | . | gene_id "XLOC_019905"; transcript_id "TCONS_00033258"; exon_number "2"; oId "CUFF.35731.1"; tss_id "TSS25101"; |
| chr16 | Cufflinks exon56698703 | 56698834 | . | + | . | gene_id "XLOC_019905"; transcript_id "TCONS_00033258"; exon_number "3"; oId "CUFF.35731.1"; tss_id "TSS25101"; |
| chr16 | Cufflinks exon56699655 | 56700407 | . | + | . | gene_id "XLOC_019905"; transcript_id "TCONS_00033258"; exon_number "4"; oId "CUFF.35731.1"; tss_id "TSS25101"; |
| chr16 | Cufflinks exon72698986 | 72699232 | . | + | . | gene_id "XLOC_020068"; transcript_id "TCONS_00033595"; exon_number "1"; oId "CUFF.36343.1"; tss_id "TSS25306"; |
| chr16 | Cufflinks exon72747232 | 72747315 | . | + | . | gene_id "XLOC_020068"; transcript_id "TCONS_00033595"; exon_number "2"; oId "CUFF.36343.1"; tss_id "TSS25306"; |
| chr16 | Cufflinks exon72779304 | 72779365 | . | + | . | gene_id "XLOC_020068"; transcript_id "TCONS_00033595"; exon_number "3"; oId "CUFF.36343.1"; tss_id "TSS25306"; |
| chr16 | Cufflinks exon72815627 | 72815718 | . | + | . | gene_id "XLOC_020068"; transcript_id "TCONS_00033595"; exon_number "4"; oId "CUFF.36343.1"; tss_id "TSS25306"; |
| chr16 | Cufflinks exon72821062 | 72821249 | . | + | . | gene_id "XLOC_020068"; transcript_id "TCONS_00033595"; exon_number "5"; oId "CUFF.36343.1"; tss_id "TSS25306"; |

|                                             |   |   |   |                                                                    |  |
|---------------------------------------------|---|---|---|--------------------------------------------------------------------|--|
| "5"; oId "CUFF.36343.1"; tss_id "TSS25306"; |   |   |   |                                                                    |  |
| chr16 Cufflinks exon72821562 72829051       | . | + | . | gene_id "XLOC_020068"; transcript_id "TCONS_00033595"; exon_number |  |
| "6"; oId "CUFF.36343.1"; tss_id "TSS25306"; |   |   |   |                                                                    |  |
| chr16 Cufflinks exon72699024 72699232       | . | + | . | gene_id "XLOC_020068"; transcript_id "TCONS_00033597"; exon_number |  |
| "1"; oId "CUFF.36343.3"; tss_id "TSS25306"; |   |   |   |                                                                    |  |
| chr16 Cufflinks exon72747232 72747315       | . | + | . | gene_id "XLOC_020068"; transcript_id "TCONS_00033597"; exon_number |  |
| "2"; oId "CUFF.36343.3"; tss_id "TSS25306"; |   |   |   |                                                                    |  |
| chr16 Cufflinks exon72747846 72747888       | . | + | . | gene_id "XLOC_020068"; transcript_id "TCONS_00033597"; exon_number |  |
| "3"; oId "CUFF.36343.3"; tss_id "TSS25306"; |   |   |   |                                                                    |  |
| chr16 Cufflinks exon72779304 72779365       | . | + | . | gene_id "XLOC_020068"; transcript_id "TCONS_00033597"; exon_number |  |
| "4"; oId "CUFF.36343.3"; tss_id "TSS25306"; |   |   |   |                                                                    |  |
| chr16 Cufflinks exon72821562 72829051       | . | + | . | gene_id "XLOC_020068"; transcript_id "TCONS_00033597"; exon_number |  |
| "5"; oId "CUFF.36343.3"; tss_id "TSS25306"; |   |   |   |                                                                    |  |
| chr16 Cufflinks exon72699024 72699232       | . | + | . | gene_id "XLOC_020068"; transcript_id "TCONS_00033596"; exon_number |  |
| "1"; oId "CUFF.36343.2"; tss_id "TSS25306"; |   |   |   |                                                                    |  |
| chr16 Cufflinks exon72779304 72779365       | . | + | . | gene_id "XLOC_020068"; transcript_id "TCONS_00033596"; exon_number |  |
| "2"; oId "CUFF.36343.2"; tss_id "TSS25306"; |   |   |   |                                                                    |  |
| chr16 Cufflinks exon72815627 72815718       | . | + | . | gene_id "XLOC_020068"; transcript_id "TCONS_00033596"; exon_number |  |
| "3"; oId "CUFF.36343.2"; tss_id "TSS25306"; |   |   |   |                                                                    |  |
| chr16 Cufflinks exon72821062 72821249       | . | + | . | gene_id "XLOC_020068"; transcript_id "TCONS_00033596"; exon_number |  |
| "4"; oId "CUFF.36343.2"; tss_id "TSS25306"; |   |   |   |                                                                    |  |
| chr16 Cufflinks exon72821562 72829051       | . | + | . | gene_id "XLOC_020068"; transcript_id "TCONS_00033596"; exon_number |  |
| "5"; oId "CUFF.36343.2"; tss_id "TSS25306"; |   |   |   |                                                                    |  |
| chr16 Cufflinks exon72699039 72699232       | . | + | . | gene_id "XLOC_020068"; transcript_id "TCONS_00033598"; exon_number |  |
| "1"; oId "CUFF.36343.4"; tss_id "TSS25306"; |   |   |   |                                                                    |  |
| chr16 Cufflinks exon72747232 72747315       | . | + | . | gene_id "XLOC_020068"; transcript_id "TCONS_00033598"; exon_number |  |
| "2"; oId "CUFF.36343.4"; tss_id "TSS25306"; |   |   |   |                                                                    |  |
| chr16 Cufflinks exon72747846 72747888       | . | + | . | gene_id "XLOC_020068"; transcript_id "TCONS_00033598"; exon_number |  |
| "3"; oId "CUFF.36343.4"; tss_id "TSS25306"; |   |   |   |                                                                    |  |
| chr16 Cufflinks exon72779304 72779366       | . | + | . | gene_id "XLOC_020068"; transcript_id "TCONS_00033598"; exon_number |  |
| "4"; oId "CUFF.36343.4"; tss_id "TSS25306"; |   |   |   |                                                                    |  |
| chr16 Cufflinks exon72815627 72815718       | . | + | . | gene_id "XLOC_020068"; transcript_id "TCONS_00033598"; exon_number |  |
| "5"; oId "CUFF.36343.4"; tss_id "TSS25306"; |   |   |   |                                                                    |  |
| chr16 Cufflinks exon72838898 72839158       | . | + | . | gene_id "XLOC_020068"; transcript_id "TCONS_00033598"; exon_number |  |
| "6"; oId "CUFF.36343.4"; tss_id "TSS25306"; |   |   |   |                                                                    |  |
| chr16 Cufflinks exon72839816 72844441       | . | + | . | gene_id "XLOC_020068"; transcript_id "TCONS_00033598"; exon_number |  |
| "7"; oId "CUFF.36343.4"; tss_id "TSS25306"; |   |   |   |                                                                    |  |
| chr16 Cufflinks exon81772623 81772990       | . | + | . | gene_id "XLOC_020132"; transcript_id "TCONS_00033687"; exon_number |  |
| "1"; oId "CUFF.36619.1"; tss_id "TSS25376"; |   |   |   |                                                                    |  |
| chr16 Cufflinks exon81789475 81789571       | . | + | . | gene_id "XLOC_020132"; transcript_id "TCONS_00033687"; exon_number |  |
| "2"; oId "CUFF.36619.1"; tss_id "TSS25376"; |   |   |   |                                                                    |  |
| chr16 Cufflinks exon81797029 81797125       | . | + | . | gene_id "XLOC_020132"; transcript_id "TCONS_00033687"; exon_number |  |
| "3"; oId "CUFF.36619.1"; tss_id "TSS25376"; |   |   |   |                                                                    |  |

|       |                        |          |   |   |   |                                                                                                                |
|-------|------------------------|----------|---|---|---|----------------------------------------------------------------------------------------------------------------|
| chr16 | Cufflinks exon81810777 | 81810918 | . | + | . | gene_id "XLOC_020132"; transcript_id "TCONS_00033687"; exon_number "4"; oId "CUFF.36619.1"; tss_id "TSS25376"; |
| chr16 | Cufflinks exon81786151 | 81786419 | . | + | . | gene_id "XLOC_020132"; transcript_id "TCONS_00033688"; exon_number "1"; oId "CUFF.36619.2"; tss_id "TSS25377"; |
| chr16 | Cufflinks exon81789475 | 81789571 | . | + | . | gene_id "XLOC_020132"; transcript_id "TCONS_00033688"; exon_number "2"; oId "CUFF.36619.2"; tss_id "TSS25377"; |
| chr16 | Cufflinks exon81797029 | 81797125 | . | + | . | gene_id "XLOC_020132"; transcript_id "TCONS_00033688"; exon_number "3"; oId "CUFF.36619.2"; tss_id "TSS25377"; |
| chr16 | Cufflinks exon81810777 | 81810918 | . | + | . | gene_id "XLOC_020132"; transcript_id "TCONS_00033688"; exon_number "4"; oId "CUFF.36619.2"; tss_id "TSS25377"; |
| chr16 | Cufflinks exon85337108 | 85337269 | . | + | . | gene_id "XLOC_020159"; transcript_id "TCONS_00033742"; exon_number "1"; oId "CUFF.36720.2"; tss_id "TSS25411"; |
| chr16 | Cufflinks exon85341767 | 85343139 | . | + | . | gene_id "XLOC_020159"; transcript_id "TCONS_00033742"; exon_number "2"; oId "CUFF.36720.2"; tss_id "TSS25411"; |
| chr16 | Cufflinks exon85337108 | 85337269 | . | + | . | gene_id "XLOC_020159"; transcript_id "TCONS_00033741"; exon_number "1"; oId "CUFF.36720.1"; tss_id "TSS25411"; |
| chr16 | Cufflinks exon85341768 | 85343139 | . | + | . | gene_id "XLOC_020159"; transcript_id "TCONS_00033741"; exon_number "2"; oId "CUFF.36720.1"; tss_id "TSS25411"; |
| chr16 | Cufflinks exon85337117 | 85337269 | . | + | . | gene_id "XLOC_020159"; transcript_id "TCONS_00033743"; exon_number "1"; oId "CUFF.36720.3"; tss_id "TSS25411"; |
| chr16 | Cufflinks exon85341802 | 85343139 | . | + | . | gene_id "XLOC_020159"; transcript_id "TCONS_00033743"; exon_number "2"; oId "CUFF.36720.3"; tss_id "TSS25411"; |
| chr16 | Cufflinks exon85337154 | 85337222 | . | + | . | gene_id "XLOC_020159"; transcript_id "TCONS_00033744"; exon_number "1"; oId "CUFF.36720.4"; tss_id "TSS25411"; |
| chr16 | Cufflinks exon85341768 | 85343139 | . | + | . | gene_id "XLOC_020159"; transcript_id "TCONS_00033744"; exon_number "2"; oId "CUFF.36720.4"; tss_id "TSS25411"; |
| chr16 | Cufflinks exon85337161 | 85337222 | . | + | . | gene_id "XLOC_020159"; transcript_id "TCONS_00033745"; exon_number "1"; oId "CUFF.36720.5"; tss_id "TSS25411"; |
| chr16 | Cufflinks exon85341767 | 85343139 | . | + | . | gene_id "XLOC_020159"; transcript_id "TCONS_00033745"; exon_number "2"; oId "CUFF.36720.5"; tss_id "TSS25411"; |
| chr16 | Cufflinks exon85341370 | 85341418 | . | + | . | gene_id "XLOC_020159"; transcript_id "TCONS_00033748"; exon_number "1"; oId "CUFF.36720.7"; tss_id "TSS25413"; |
| chr16 | Cufflinks exon85341768 | 85343139 | . | + | . | gene_id "XLOC_020159"; transcript_id "TCONS_00033748"; exon_number "2"; oId "CUFF.36720.7"; tss_id "TSS25413"; |
| chr16 | Cufflinks exon85360175 | 85360257 | . | + | . | gene_id "XLOC_020161"; transcript_id "TCONS_00033749"; exon_number "1"; oId "CUFF.36724.1"; tss_id "TSS25415"; |
| chr16 | Cufflinks exon85366843 | 85368735 | . | + | . | gene_id "XLOC_020161"; transcript_id "TCONS_00033749"; exon_number "2"; oId "CUFF.36724.1"; tss_id "TSS25415"; |
| chr16 | Cufflinks exon85363535 | 85364236 | . | + | . | gene_id "XLOC_020161"; transcript_id "TCONS_00033751"; exon_number "1"; oId "CUFF.36724.2"; tss_id "TSS25416"; |
| chr16 | Cufflinks exon85365336 | 85366767 | . | + | . | gene_id "XLOC_020161"; transcript_id "TCONS_00033751"; exon_number "2"; oId "CUFF.36724.2"; tss_id "TSS25416"; |
| chr16 | Cufflinks exon85363535 | 85364236 | . | + | . | gene_id "XLOC_020161"; transcript_id "TCONS_00033752"; exon_number "1"; oId "CUFF.36724.2"; tss_id "TSS25416"; |

"1"; oId "CUFF.36724.3"; tss\_id "TSS25416";  
chr16 Cufflinks exon85366843 85368735 . + . gene\_id "XLOC\_020161"; transcript\_id "TCONS\_00033752"; exon\_number  
"2"; oId "CUFF.36724.3"; tss\_id "TSS25416";  
chr16 Cufflinks exon85481157 85482419 . + . gene\_id "XLOC\_020167"; transcript\_id "TCONS\_00033757"; exon\_number  
"1"; oId "CUFF.36733.1"; tss\_id "TSS25422";  
chr16 Cufflinks exon85483125 85483713 . + . gene\_id "XLOC\_020167"; transcript\_id "TCONS\_00033757"; exon\_number  
"2"; oId "CUFF.36733.1"; tss\_id "TSS25422";  
chr16 Cufflinks exon85482424 85482646 . + . gene\_id "XLOC\_020167"; transcript\_id "TCONS\_00033758"; exon\_number  
"1"; oId "CUFF.36733.2"; tss\_id "TSS25423";  
chr16 Cufflinks exon85483125 85483713 . + . gene\_id "XLOC\_020167"; transcript\_id "TCONS\_00033758"; exon\_number  
"2"; oId "CUFF.36733.2"; tss\_id "TSS25423";  
chr16 Cufflinks exon85482439 85482468 . + . gene\_id "XLOC\_020167"; transcript\_id "TCONS\_00033760"; exon\_number  
"1"; oId "CUFF.36733.4"; tss\_id "TSS25423";  
chr16 Cufflinks exon85483125 85483713 . + . gene\_id "XLOC\_020167"; transcript\_id "TCONS\_00033760"; exon\_number  
"2"; oId "CUFF.36733.4"; tss\_id "TSS25423";  
chr16 Cufflinks exon85495222 85496731 . + . gene\_id "XLOC\_020168"; transcript\_id "TCONS\_00033761"; exon\_number  
"1"; oId "CUFF.36734.1"; tss\_id "TSS25424";  
chr16 Cufflinks exon85496855 85509361 . + . gene\_id "XLOC\_020168"; transcript\_id "TCONS\_00033761"; exon\_number  
"2"; oId "CUFF.36734.1"; tss\_id "TSS25424";  
chr16 Cufflinks exon85496330 85496731 . + . gene\_id "XLOC\_020168"; transcript\_id "TCONS\_00033763"; exon\_number  
"1"; oId "CUFF.36734.4"; tss\_id "TSS25425";  
chr16 Cufflinks exon85522106 85525027 . + . gene\_id "XLOC\_020168"; transcript\_id "TCONS\_00033763"; exon\_number  
"2"; oId "CUFF.36734.4"; tss\_id "TSS25425";  
chr16 Cufflinks exon85496330 85496731 . + . gene\_id "XLOC\_020168"; transcript\_id "TCONS\_00033762"; exon\_number  
"1"; oId "CUFF.36734.2"; tss\_id "TSS25425";  
chr16 Cufflinks exon85522109 85525027 . + . gene\_id "XLOC\_020168"; transcript\_id "TCONS\_00033762"; exon\_number  
"2"; oId "CUFF.36734.2"; tss\_id "TSS25425";  
chr16 Cufflinks exon85496330 85496731 . + . gene\_id "XLOC\_020168"; transcript\_id "TCONS\_00033764"; exon\_number  
"1"; oId "CUFF.36734.3"; tss\_id "TSS25425";  
chr16 Cufflinks exon85572788 85574556 . + . gene\_id "XLOC\_020168"; transcript\_id "TCONS\_00033764"; exon\_number  
"2"; oId "CUFF.36734.3"; tss\_id "TSS25425";  
chr16 Cufflinks exon85498009 85498587 . + . gene\_id "XLOC\_020168"; transcript\_id "TCONS\_00033765"; exon\_number  
"1"; oId "CUFF.36734.5"; tss\_id "TSS25426";  
chr16 Cufflinks exon85498729 85499101 . + . gene\_id "XLOC\_020168"; transcript\_id "TCONS\_00033765"; exon\_number  
"2"; oId "CUFF.36734.5"; tss\_id "TSS25426";  
chr16 Cufflinks exon85499364 85509361 . + . gene\_id "XLOC\_020168"; transcript\_id "TCONS\_00033765"; exon\_number  
"3"; oId "CUFF.36734.5"; tss\_id "TSS25426";  
chr16 Cufflinks exon85562820 85565911 . + . gene\_id "XLOC\_020193"; transcript\_id "TCONS\_00033791"; exon\_number  
"1"; oId "CUFF.36775.1"; tss\_id "TSS25453";  
chr16 Cufflinks exon85567407 85567715 . + . gene\_id "XLOC\_020193"; transcript\_id "TCONS\_00033791"; exon\_number  
"2"; oId "CUFF.36775.1"; tss\_id "TSS25453";  
chr16 Cufflinks exon87351094 87351281 . + . gene\_id "XLOC\_020233"; transcript\_id "TCONS\_00033840"; exon\_number  
"1"; oId "CUFF.36860.1"; tss\_id "TSS25495";



|       |                        |          |   |   |   |                                                                                                                |
|-------|------------------------|----------|---|---|---|----------------------------------------------------------------------------------------------------------------|
| chr16 | Cufflinks exon87351463 | 87351649 | . | + | . | gene_id "XLOC_020233"; transcript_id "TCONS_00033840"; exon_number "2"; oId "CUFF.36860.1"; tss_id "TSS25495"; |
| chr16 | Cufflinks exon87351113 | 87351328 | . | + | . | gene_id "XLOC_020233"; transcript_id "TCONS_00033841"; exon_number "1"; oId "CUFF.36860.2"; tss_id "TSS25495"; |
| chr16 | Cufflinks exon87351463 | 87351649 | . | + | . | gene_id "XLOC_020233"; transcript_id "TCONS_00033841"; exon_number "2"; oId "CUFF.36860.2"; tss_id "TSS25495"; |
| chr16 | Cufflinks exon87526725 | 87527119 | . | + | . | gene_id "XLOC_020239"; transcript_id "TCONS_00033847"; exon_number "1"; oId "CUFF.36876.1"; tss_id "TSS25501"; |
| chr16 | Cufflinks exon87527704 | 87527841 | . | + | . | gene_id "XLOC_020239"; transcript_id "TCONS_00033847"; exon_number "2"; oId "CUFF.36876.1"; tss_id "TSS25501"; |
| chr16 | Cufflinks exon87529125 | 87529319 | . | + | . | gene_id "XLOC_020239"; transcript_id "TCONS_00033847"; exon_number "3"; oId "CUFF.36876.1"; tss_id "TSS25501"; |
| chr16 | Cufflinks exon87530596 | 87532337 | . | + | . | gene_id "XLOC_020239"; transcript_id "TCONS_00033847"; exon_number "4"; oId "CUFF.36876.1"; tss_id "TSS25501"; |
| chr16 | Cufflinks exon87527224 | 87527410 | . | + | . | gene_id "XLOC_020239"; transcript_id "TCONS_00033848"; exon_number "1"; oId "CUFF.36876.2"; tss_id "TSS25502"; |
| chr16 | Cufflinks exon87527704 | 87527841 | . | + | . | gene_id "XLOC_020239"; transcript_id "TCONS_00033848"; exon_number "2"; oId "CUFF.36876.2"; tss_id "TSS25502"; |
| chr16 | Cufflinks exon87529125 | 87529319 | . | + | . | gene_id "XLOC_020239"; transcript_id "TCONS_00033848"; exon_number "3"; oId "CUFF.36876.2"; tss_id "TSS25502"; |
| chr16 | Cufflinks exon87530596 | 87530771 | . | + | . | gene_id "XLOC_020239"; transcript_id "TCONS_00033848"; exon_number "4"; oId "CUFF.36876.2"; tss_id "TSS25502"; |
| chr16 | Cufflinks exon87537418 | 87537593 | . | + | . | gene_id "XLOC_020239"; transcript_id "TCONS_00033848"; exon_number "5"; oId "CUFF.36876.2"; tss_id "TSS25502"; |
| chr16 | Cufflinks exon87539788 | 87539992 | . | + | . | gene_id "XLOC_020239"; transcript_id "TCONS_00033848"; exon_number "6"; oId "CUFF.36876.2"; tss_id "TSS25502"; |
| chr16 | Cufflinks exon87549122 | 87550384 | . | + | . | gene_id "XLOC_020239"; transcript_id "TCONS_00033848"; exon_number "7"; oId "CUFF.36876.2"; tss_id "TSS25502"; |
| chr16 | Cufflinks exon87527333 | 87527410 | . | + | . | gene_id "XLOC_020239"; transcript_id "TCONS_00033849"; exon_number "1"; oId "CUFF.36876.3"; tss_id "TSS25503"; |
| chr16 | Cufflinks exon87527704 | 87527841 | . | + | . | gene_id "XLOC_020239"; transcript_id "TCONS_00033849"; exon_number "2"; oId "CUFF.36876.3"; tss_id "TSS25503"; |
| chr16 | Cufflinks exon87529131 | 87529319 | . | + | . | gene_id "XLOC_020239"; transcript_id "TCONS_00033849"; exon_number "3"; oId "CUFF.36876.3"; tss_id "TSS25503"; |
| chr16 | Cufflinks exon87530596 | 87532337 | . | + | . | gene_id "XLOC_020239"; transcript_id "TCONS_00033849"; exon_number "4"; oId "CUFF.36876.3"; tss_id "TSS25503"; |
| chr16 | Cufflinks exon87527333 | 87527410 | . | + | . | gene_id "XLOC_020239"; transcript_id "TCONS_00033850"; exon_number "1"; oId "CUFF.36876.4"; tss_id "TSS25503"; |
| chr16 | Cufflinks exon87527704 | 87527841 | . | + | . | gene_id "XLOC_020239"; transcript_id "TCONS_00033850"; exon_number "2"; oId "CUFF.36876.4"; tss_id "TSS25503"; |
| chr16 | Cufflinks exon87529125 | 87529319 | . | + | . | gene_id "XLOC_020239"; transcript_id "TCONS_00033850"; exon_number "3"; oId "CUFF.36876.4"; tss_id "TSS25503"; |
| chr16 | Cufflinks exon87530596 | 87530771 | . | + | . | gene_id "XLOC_020239"; transcript_id "TCONS_00033850"; exon_number "4"; oId "CUFF.36876.4"; tss_id "TSS25503"; |

"4"; oId "CUFF.36876.4"; tss\_id "TSS25503";  
chr16 Cufflinks exon87537418 87537593 . + . gene\_id "XLOC\_020239"; transcript\_id "TCONS\_00033850"; exon\_number  
"5"; oId "CUFF.36876.4"; tss\_id "TSS25503";  
chr16 Cufflinks exon87539880 87539992 . + . gene\_id "XLOC\_020239"; transcript\_id "TCONS\_00033850"; exon\_number  
"6"; oId "CUFF.36876.4"; tss\_id "TSS25503";  
chr16 Cufflinks exon87549122 87550384 . + . gene\_id "XLOC\_020239"; transcript\_id "TCONS\_00033850"; exon\_number  
"7"; oId "CUFF.36876.4"; tss\_id "TSS25503";  
chr16 Cufflinks exon88729781 88729808 . + . gene\_id "XLOC\_020253"; transcript\_id "TCONS\_00033882"; exon\_number  
"1"; oId "CUFF.36947.6"; tss\_id "TSS25523";  
chr16 Cufflinks exon88737685 88737873 . + . gene\_id "XLOC\_020253"; transcript\_id "TCONS\_00033882"; exon\_number  
"2"; oId "CUFF.36947.6"; tss\_id "TSS25523";  
chr16 Cufflinks exon88738221 88738530 . + . gene\_id "XLOC\_020253"; transcript\_id "TCONS\_00033882"; exon\_number  
"3"; oId "CUFF.36947.6"; tss\_id "TSS25523";  
chr16 Cufflinks exon88740012 88741914 . + . gene\_id "XLOC\_020253"; transcript\_id "TCONS\_00033882"; exon\_number  
"4"; oId "CUFF.36947.6"; tss\_id "TSS25523";  
chr16 Cufflinks exon88729781 88729808 . + . gene\_id "XLOC\_020253"; transcript\_id "TCONS\_00033883"; exon\_number  
"1"; oId "CUFF.36947.7"; tss\_id "TSS25523";  
chr16 Cufflinks exon88737685 88737873 . + . gene\_id "XLOC\_020253"; transcript\_id "TCONS\_00033883"; exon\_number  
"2"; oId "CUFF.36947.7"; tss\_id "TSS25523";  
chr16 Cufflinks exon88738221 88738530 . + . gene\_id "XLOC\_020253"; transcript\_id "TCONS\_00033883"; exon\_number  
"3"; oId "CUFF.36947.7"; tss\_id "TSS25523";  
chr16 Cufflinks exon88753199 88753594 . + . gene\_id "XLOC\_020253"; transcript\_id "TCONS\_00033883"; exon\_number  
"4"; oId "CUFF.36947.7"; tss\_id "TSS25523";  
chr16 Cufflinks exon88851693 88852279 . + . gene\_id "XLOC\_020255"; transcript\_id "TCONS\_00033885"; exon\_number  
"1"; oId "CUFF.36957.1"; tss\_id "TSS25525";  
chr16 Cufflinks exon88857202 88857496 . + . gene\_id "XLOC\_020255"; transcript\_id "TCONS\_00033885"; exon\_number  
"2"; oId "CUFF.36957.1"; tss\_id "TSS25525";  
chr16 Cufflinks exon88857910 88865768 . + . gene\_id "XLOC\_020255"; transcript\_id "TCONS\_00033885"; exon\_number  
"3"; oId "CUFF.36957.1"; tss\_id "TSS25525";  
chr16 Cufflinks exon89079932 89080352 . + . gene\_id "XLOC\_020268"; transcript\_id "TCONS\_00033903"; exon\_number  
"1"; oId "CUFF.36998.1"; tss\_id "TSS25540";  
chr16 Cufflinks exon89082475 89083647 . + . gene\_id "XLOC\_020268"; transcript\_id "TCONS\_00033903"; exon\_number  
"2"; oId "CUFF.36998.1"; tss\_id "TSS25540";  
chr16 Cufflinks exon89132124 89132154 . + . gene\_id "XLOC\_020270"; transcript\_id "TCONS\_00033906"; exon\_number  
"1"; oId "CUFF.37004.1"; tss\_id "TSS25543";  
chr16 Cufflinks exon89132257 89132374 . + . gene\_id "XLOC\_020270"; transcript\_id "TCONS\_00033906"; exon\_number  
"2"; oId "CUFF.37004.1"; tss\_id "TSS25543";  
chr16 Cufflinks exon89133079 89133674 . + . gene\_id "XLOC\_020270"; transcript\_id "TCONS\_00033906"; exon\_number  
"3"; oId "CUFF.37004.1"; tss\_id "TSS25543";  
chr16 Cufflinks exon89133816 89134006 . + . gene\_id "XLOC\_020270"; transcript\_id "TCONS\_00033906"; exon\_number  
"4"; oId "CUFF.37004.1"; tss\_id "TSS25543";  
chr16 Cufflinks exon89137882 89138097 . + . gene\_id "XLOC\_020270"; transcript\_id "TCONS\_00033906"; exon\_number  
"5"; oId "CUFF.37004.1"; tss\_id "TSS25543";

|       |                |          |          |   |   |   |                                                                                                                |
|-------|----------------|----------|----------|---|---|---|----------------------------------------------------------------------------------------------------------------|
| chr16 | Cufflinks exon | 89138522 | 89138606 | . | + | . | gene_id "XLOC_020270"; transcript_id "TCONS_00033906"; exon_number "6"; oId "CUFF.37004.1"; tss_id "TSS25543"; |
| chr16 | Cufflinks exon | 89139768 | 89144227 | . | + | . | gene_id "XLOC_020270"; transcript_id "TCONS_00033906"; exon_number "7"; oId "CUFF.37004.1"; tss_id "TSS25543"; |
| chr16 | Cufflinks exon | 89132132 | 89132374 | . | + | . | gene_id "XLOC_020270"; transcript_id "TCONS_00033907"; exon_number "1"; oId "CUFF.37004.2"; tss_id "TSS25543"; |
| chr16 | Cufflinks exon | 89139768 | 89144227 | . | + | . | gene_id "XLOC_020270"; transcript_id "TCONS_00033907"; exon_number "2"; oId "CUFF.37004.2"; tss_id "TSS25543"; |
| chr16 | Cufflinks exon | 89137401 | 89138604 | . | + | . | gene_id "XLOC_020270"; transcript_id "TCONS_00033908"; exon_number "1"; oId "CUFF.37004.3"; tss_id "TSS25544"; |
| chr16 | Cufflinks exon | 89139768 | 89144227 | . | + | . | gene_id "XLOC_020270"; transcript_id "TCONS_00033908"; exon_number "2"; oId "CUFF.37004.3"; tss_id "TSS25544"; |
| chr16 | Cufflinks exon | 89883163 | 89884946 | . | + | . | gene_id "XLOC_020303"; transcript_id "TCONS_00033974"; exon_number "1"; oId "CUFF.37086.3"; tss_id "TSS25591"; |
| chr16 | Cufflinks exon | 89894073 | 89894776 | . | + | . | gene_id "XLOC_020303"; transcript_id "TCONS_00033974"; exon_number "2"; oId "CUFF.37086.3"; tss_id "TSS25591"; |
| chr16 | Cufflinks exon | 694949   | 698615   | . | - | . | gene_id "XLOC_020365"; transcript_id "TCONS_00034088"; exon_number "1"; oId "CUFF.33745.2"; tss_id "TSS25670"; |
| chr16 | Cufflinks exon | 698955   | 699313   | . | - | . | gene_id "XLOC_020365"; transcript_id "TCONS_00034088"; exon_number "2"; oId "CUFF.33745.2"; tss_id "TSS25670"; |
| chr16 | Cufflinks exon | 855105   | 856402   | . | - | . | gene_id "XLOC_020376"; transcript_id "TCONS_00034106"; exon_number "1"; oId "CUFF.33773.2"; tss_id "TSS25686"; |
| chr16 | Cufflinks exon | 857319   | 857812   | . | - | . | gene_id "XLOC_020376"; transcript_id "TCONS_00034106"; exon_number "2"; oId "CUFF.33773.2"; tss_id "TSS25686"; |
| chr16 | Cufflinks exon | 2201926  | 2204923  | . | - | . | gene_id "XLOC_020420"; transcript_id "TCONS_00034182"; exon_number "1"; oId "CUFF.33888.2"; tss_id "TSS25739"; |
| chr16 | Cufflinks exon | 2205144  | 2205359  | . | - | . | gene_id "XLOC_020420"; transcript_id "TCONS_00034182"; exon_number "2"; oId "CUFF.33888.2"; tss_id "TSS25739"; |
| chr16 | Cufflinks exon | 3015916  | 3018516  | . | - | . | gene_id "XLOC_020450"; transcript_id "TCONS_00034233"; exon_number "1"; oId "CUFF.34005.1"; tss_id "TSS25781"; |
| chr16 | Cufflinks exon | 3020876  | 3020898  | . | - | . | gene_id "XLOC_020450"; transcript_id "TCONS_00034233"; exon_number "2"; oId "CUFF.34005.1"; tss_id "TSS25781"; |
| chr16 | Cufflinks exon | 3102126  | 3105033  | . | - | . | gene_id "XLOC_020458"; transcript_id "TCONS_00034244"; exon_number "1"; oId "CUFF.34026.6"; tss_id "TSS25790"; |
| chr16 | Cufflinks exon | 3105737  | 3105946  | . | - | . | gene_id "XLOC_020458"; transcript_id "TCONS_00034244"; exon_number "2"; oId "CUFF.34026.6"; tss_id "TSS25790"; |
| chr16 | Cufflinks exon | 3113829  | 3113986  | . | - | . | gene_id "XLOC_020458"; transcript_id "TCONS_00034244"; exon_number "3"; oId "CUFF.34026.6"; tss_id "TSS25790"; |
| chr16 | Cufflinks exon | 12023246 | 12023302 | . | - | . | gene_id "XLOC_020556"; transcript_id "TCONS_00034421"; exon_number "1"; oId "CUFF.34372.2"; tss_id "TSS25921"; |
| chr16 | Cufflinks exon | 12027374 | 12027518 | . | - | . | gene_id "XLOC_020556"; transcript_id "TCONS_00034421"; exon_number "2"; oId "CUFF.34372.2"; tss_id "TSS25921"; |
| chr16 | Cufflinks exon | 12027682 | 12027781 | . | - | . | gene_id "XLOC_020556"; transcript_id "TCONS_00034421"; exon_number "3"; oId "CUFF.34372.2"; tss_id "TSS25921"; |

|                                             |   |   |   |                                                                    |  |
|---------------------------------------------|---|---|---|--------------------------------------------------------------------|--|
| "3"; oId "CUFF.34372.2"; tss_id "TSS25921"; |   |   |   |                                                                    |  |
| chr16 Cufflinks exon12031397 12031525       | . | - | . | gene_id "XLOC_020556"; transcript_id "TCONS_00034421"; exon_number |  |
| "4"; oId "CUFF.34372.2"; tss_id "TSS25921"; |   |   |   |                                                                    |  |
| chr16 Cufflinks exon12050001 12050094       | . | - | . | gene_id "XLOC_020556"; transcript_id "TCONS_00034421"; exon_number |  |
| "5"; oId "CUFF.34372.2"; tss_id "TSS25921"; |   |   |   |                                                                    |  |
| chr16 Cufflinks exon12070425 12070524       | . | - | . | gene_id "XLOC_020556"; transcript_id "TCONS_00034421"; exon_number |  |
| "6"; oId "CUFF.34372.2"; tss_id "TSS25921"; |   |   |   |                                                                    |  |
| chr16 Cufflinks exon12023246 12023302       | . | - | . | gene_id "XLOC_020556"; transcript_id "TCONS_00034420"; exon_number |  |
| "1"; oId "CUFF.34372.1"; tss_id "TSS25921"; |   |   |   |                                                                    |  |
| chr16 Cufflinks exon12027374 12027518       | . | - | . | gene_id "XLOC_020556"; transcript_id "TCONS_00034420"; exon_number |  |
| "2"; oId "CUFF.34372.1"; tss_id "TSS25921"; |   |   |   |                                                                    |  |
| chr16 Cufflinks exon12027682 12027781       | . | - | . | gene_id "XLOC_020556"; transcript_id "TCONS_00034420"; exon_number |  |
| "3"; oId "CUFF.34372.1"; tss_id "TSS25921"; |   |   |   |                                                                    |  |
| chr16 Cufflinks exon12031397 12031525       | . | - | . | gene_id "XLOC_020556"; transcript_id "TCONS_00034420"; exon_number |  |
| "4"; oId "CUFF.34372.1"; tss_id "TSS25921"; |   |   |   |                                                                    |  |
| chr16 Cufflinks exon12050001 12050094       | . | - | . | gene_id "XLOC_020556"; transcript_id "TCONS_00034420"; exon_number |  |
| "5"; oId "CUFF.34372.1"; tss_id "TSS25921"; |   |   |   |                                                                    |  |
| chr16 Cufflinks exon12057748 12057883       | . | - | . | gene_id "XLOC_020556"; transcript_id "TCONS_00034420"; exon_number |  |
| "6"; oId "CUFF.34372.1"; tss_id "TSS25921"; |   |   |   |                                                                    |  |
| chr16 Cufflinks exon12070425 12070524       | . | - | . | gene_id "XLOC_020556"; transcript_id "TCONS_00034420"; exon_number |  |
| "7"; oId "CUFF.34372.1"; tss_id "TSS25921"; |   |   |   |                                                                    |  |
| chr16 Cufflinks exon12646005 12646464       | . | - | . | gene_id "XLOC_020558"; transcript_id "TCONS_00034426"; exon_number |  |
| "1"; oId "CUFF.34379.2"; tss_id "TSS25924"; |   |   |   |                                                                    |  |
| chr16 Cufflinks exon12646934 12647126       | . | - | . | gene_id "XLOC_020558"; transcript_id "TCONS_00034426"; exon_number |  |
| "2"; oId "CUFF.34379.2"; tss_id "TSS25924"; |   |   |   |                                                                    |  |
| chr16 Cufflinks exon12650212 12650396       | . | - | . | gene_id "XLOC_020558"; transcript_id "TCONS_00034426"; exon_number |  |
| "3"; oId "CUFF.34379.2"; tss_id "TSS25924"; |   |   |   |                                                                    |  |
| chr16 Cufflinks exon12713381 12713515       | . | - | . | gene_id "XLOC_020558"; transcript_id "TCONS_00034426"; exon_number |  |
| "4"; oId "CUFF.34379.2"; tss_id "TSS25924"; |   |   |   |                                                                    |  |
| chr16 Cufflinks exon15232082 15232120       | . | - | . | gene_id "XLOC_020581"; transcript_id "TCONS_00034461"; exon_number |  |
| "1"; oId "CUFF.34447.1"; tss_id "TSS25952"; |   |   |   |                                                                    |  |
| chr16 Cufflinks exon15232242 15232313       | . | - | . | gene_id "XLOC_020581"; transcript_id "TCONS_00034461"; exon_number |  |
| "2"; oId "CUFF.34447.1"; tss_id "TSS25952"; |   |   |   |                                                                    |  |
| chr16 Cufflinks exon15248207 15248678       | . | - | . | gene_id "XLOC_020581"; transcript_id "TCONS_00034461"; exon_number |  |
| "3"; oId "CUFF.34447.1"; tss_id "TSS25952"; |   |   |   |                                                                    |  |
| chr16 Cufflinks exon25079245 25084134       | . | - | . | gene_id "XLOC_020684"; transcript_id "TCONS_00034664"; exon_number |  |
| "1"; oId "CUFF.34857.1"; tss_id "TSS26099"; |   |   |   |                                                                    |  |
| chr16 Cufflinks exon25092348 25092454       | . | - | . | gene_id "XLOC_020684"; transcript_id "TCONS_00034664"; exon_number |  |
| "2"; oId "CUFF.34857.1"; tss_id "TSS26099"; |   |   |   |                                                                    |  |
| chr16 Cufflinks exon25093120 25093228       | . | - | . | gene_id "XLOC_020684"; transcript_id "TCONS_00034664"; exon_number |  |
| "3"; oId "CUFF.34857.1"; tss_id "TSS26099"; |   |   |   |                                                                    |  |
| chr16 Cufflinks exon25095953 25097093       | . | - | . | gene_id "XLOC_020685"; transcript_id "TCONS_00034665"; exon_number |  |
| "1"; oId "CUFF.34860.4"; tss_id "TSS26100"; |   |   |   |                                                                    |  |

|       |                |          |          |   |   |   |                                                                                                                |
|-------|----------------|----------|----------|---|---|---|----------------------------------------------------------------------------------------------------------------|
| chr16 | Cufflinks exon | 25114672 | 25114962 | . | - | . | gene_id "XLOC_020685"; transcript_id "TCONS_00034665"; exon_number "2"; oId "CUFF.34860.4"; tss_id "TSS26100"; |
| chr16 | Cufflinks exon | 25117688 | 25117829 | . | - | . | gene_id "XLOC_020685"; transcript_id "TCONS_00034665"; exon_number "3"; oId "CUFF.34860.4"; tss_id "TSS26100"; |
| chr16 | Cufflinks exon | 25095953 | 25098044 | . | - | . | gene_id "XLOC_020685"; transcript_id "TCONS_00034667"; exon_number "1"; oId "CUFF.34860.3"; tss_id "TSS26101"; |
| chr16 | Cufflinks exon | 25114672 | 25114701 | . | - | . | gene_id "XLOC_020685"; transcript_id "TCONS_00034667"; exon_number "2"; oId "CUFF.34860.3"; tss_id "TSS26101"; |
| chr16 | Cufflinks exon | 25114828 | 25114962 | . | - | . | gene_id "XLOC_020685"; transcript_id "TCONS_00034667"; exon_number "3"; oId "CUFF.34860.3"; tss_id "TSS26101"; |
| chr16 | Cufflinks exon | 25122717 | 25122879 | . | - | . | gene_id "XLOC_020685"; transcript_id "TCONS_00034667"; exon_number "4"; oId "CUFF.34860.3"; tss_id "TSS26101"; |
| chr16 | Cufflinks exon | 25095953 | 25097093 | . | - | . | gene_id "XLOC_020685"; transcript_id "TCONS_00034666"; exon_number "1"; oId "CUFF.34860.2"; tss_id "TSS26101"; |
| chr16 | Cufflinks exon | 25114672 | 25114962 | . | - | . | gene_id "XLOC_020685"; transcript_id "TCONS_00034666"; exon_number "2"; oId "CUFF.34860.2"; tss_id "TSS26101"; |
| chr16 | Cufflinks exon | 25122717 | 25122879 | . | - | . | gene_id "XLOC_020685"; transcript_id "TCONS_00034666"; exon_number "3"; oId "CUFF.34860.2"; tss_id "TSS26101"; |
| chr16 | Cufflinks exon | 25095953 | 25097093 | . | - | . | gene_id "XLOC_020685"; transcript_id "TCONS_00034668"; exon_number "1"; oId "CUFF.34860.1"; tss_id "TSS26101"; |
| chr16 | Cufflinks exon | 25097652 | 25098044 | . | - | . | gene_id "XLOC_020685"; transcript_id "TCONS_00034668"; exon_number "2"; oId "CUFF.34860.1"; tss_id "TSS26101"; |
| chr16 | Cufflinks exon | 25114672 | 25114962 | . | - | . | gene_id "XLOC_020685"; transcript_id "TCONS_00034668"; exon_number "3"; oId "CUFF.34860.1"; tss_id "TSS26101"; |
| chr16 | Cufflinks exon | 25122717 | 25122880 | . | - | . | gene_id "XLOC_020685"; transcript_id "TCONS_00034668"; exon_number "4"; oId "CUFF.34860.1"; tss_id "TSS26101"; |
| chr16 | Cufflinks exon | 25111885 | 25112006 | . | - | . | gene_id "XLOC_020685"; transcript_id "TCONS_00034674"; exon_number "1"; oId "CUFF.34860.5"; tss_id "TSS26101"; |
| chr16 | Cufflinks exon | 25114672 | 25114962 | . | - | . | gene_id "XLOC_020685"; transcript_id "TCONS_00034674"; exon_number "2"; oId "CUFF.34860.5"; tss_id "TSS26101"; |
| chr16 | Cufflinks exon | 25122717 | 25122876 | . | - | . | gene_id "XLOC_020685"; transcript_id "TCONS_00034674"; exon_number "3"; oId "CUFF.34860.5"; tss_id "TSS26101"; |
| chr16 | Cufflinks exon | 29405414 | 29405749 | . | - | . | gene_id "XLOC_020731"; transcript_id "TCONS_00034746"; exon_number "1"; oId "CUFF.35075.1"; tss_id "TSS26165"; |
| chr16 | Cufflinks exon | 29507278 | 29507317 | . | - | . | gene_id "XLOC_020731"; transcript_id "TCONS_00034746"; exon_number "2"; oId "CUFF.35075.1"; tss_id "TSS26165"; |
| chr16 | Cufflinks exon | 30047505 | 30047535 | . | - | . | gene_id "XLOC_020765"; transcript_id "TCONS_00034796"; exon_number "1"; oId "CUFF.35193.1"; tss_id "TSS26206"; |
| chr16 | Cufflinks exon | 30052411 | 30052477 | . | - | . | gene_id "XLOC_020765"; transcript_id "TCONS_00034796"; exon_number "2"; oId "CUFF.35193.1"; tss_id "TSS26206"; |
| chr16 | Cufflinks exon | 30057644 | 30057708 | . | - | . | gene_id "XLOC_020765"; transcript_id "TCONS_00034796"; exon_number "3"; oId "CUFF.35193.1"; tss_id "TSS26206"; |
| chr16 | Cufflinks exon | 30064095 | 30064356 | . | - | . | gene_id "XLOC_020765"; transcript_id "TCONS_00034796"; exon_number "4"; oId "CUFF.35193.1"; tss_id "TSS26206"; |

|                                             |   |   |   |                                                                    |  |
|---------------------------------------------|---|---|---|--------------------------------------------------------------------|--|
| "4"; oId "CUFF.35193.1"; tss_id "TSS26206"; |   |   |   |                                                                    |  |
| chr16 Cufflinks exon30052320 30052477       | . | - | . | gene_id "XLOC_020765"; transcript_id "TCONS_00034798"; exon_number |  |
| "1"; oId "CUFF.35193.3"; tss_id "TSS26206"; |   |   |   |                                                                    |  |
| chr16 Cufflinks exon30057644 30057710       | . | - | . | gene_id "XLOC_020765"; transcript_id "TCONS_00034798"; exon_number |  |
| "2"; oId "CUFF.35193.3"; tss_id "TSS26206"; |   |   |   |                                                                    |  |
| chr16 Cufflinks exon30057889 30058205       | . | - | . | gene_id "XLOC_020765"; transcript_id "TCONS_00034798"; exon_number |  |
| "3"; oId "CUFF.35193.3"; tss_id "TSS26206"; |   |   |   |                                                                    |  |
| chr16 Cufflinks exon30064095 30064334       | . | - | . | gene_id "XLOC_020765"; transcript_id "TCONS_00034798"; exon_number |  |
| "4"; oId "CUFF.35193.3"; tss_id "TSS26206"; |   |   |   |                                                                    |  |
| chr16 Cufflinks exon30052320 30052477       | . | - | . | gene_id "XLOC_020765"; transcript_id "TCONS_00034797"; exon_number |  |
| "1"; oId "CUFF.35193.2"; tss_id "TSS26206"; |   |   |   |                                                                    |  |
| chr16 Cufflinks exon30057644 30057708       | . | - | . | gene_id "XLOC_020765"; transcript_id "TCONS_00034797"; exon_number |  |
| "2"; oId "CUFF.35193.2"; tss_id "TSS26206"; |   |   |   |                                                                    |  |
| chr16 Cufflinks exon30057887 30058205       | . | - | . | gene_id "XLOC_020765"; transcript_id "TCONS_00034797"; exon_number |  |
| "3"; oId "CUFF.35193.2"; tss_id "TSS26206"; |   |   |   |                                                                    |  |
| chr16 Cufflinks exon30064095 30064334       | . | - | . | gene_id "XLOC_020765"; transcript_id "TCONS_00034797"; exon_number |  |
| "4"; oId "CUFF.35193.2"; tss_id "TSS26206"; |   |   |   |                                                                    |  |
| chr16 Cufflinks exon46657205 46658311       | . | - | . | gene_id "XLOC_020848"; transcript_id "TCONS_00034920"; exon_number |  |
| "1"; oId "CUFF.35496.2"; tss_id "TSS26299"; |   |   |   |                                                                    |  |
| chr16 Cufflinks exon46795821 46795834       | . | - | . | gene_id "XLOC_020848"; transcript_id "TCONS_00034920"; exon_number |  |
| "2"; oId "CUFF.35496.2"; tss_id "TSS26299"; |   |   |   |                                                                    |  |
| chr16 Cufflinks exon54204166 54205575       | . | - | . | gene_id "XLOC_020890"; transcript_id "TCONS_00034991"; exon_number |  |
| "1"; oId "CUFF.35644.1"; tss_id "TSS26354"; |   |   |   |                                                                    |  |
| chr16 Cufflinks exon54206196 54206356       | . | - | . | gene_id "XLOC_020890"; transcript_id "TCONS_00034991"; exon_number |  |
| "2"; oId "CUFF.35644.1"; tss_id "TSS26354"; |   |   |   |                                                                    |  |
| chr16 Cufflinks exon54207237 54207325       | . | - | . | gene_id "XLOC_020890"; transcript_id "TCONS_00034991"; exon_number |  |
| "3"; oId "CUFF.35644.1"; tss_id "TSS26354"; |   |   |   |                                                                    |  |
| chr16 Cufflinks exon54207492 54207702       | . | - | . | gene_id "XLOC_020890"; transcript_id "TCONS_00034991"; exon_number |  |
| "4"; oId "CUFF.35644.1"; tss_id "TSS26354"; |   |   |   |                                                                    |  |
| chr16 Cufflinks exon54210671 54210736       | . | - | . | gene_id "XLOC_020890"; transcript_id "TCONS_00034991"; exon_number |  |
| "5"; oId "CUFF.35644.1"; tss_id "TSS26354"; |   |   |   |                                                                    |  |
| chr16 Cufflinks exon54205595 54206356       | . | - | . | gene_id "XLOC_020890"; transcript_id "TCONS_00034992"; exon_number |  |
| "1"; oId "CUFF.35644.2"; tss_id "TSS26354"; |   |   |   |                                                                    |  |
| chr16 Cufflinks exon54207237 54207325       | . | - | . | gene_id "XLOC_020890"; transcript_id "TCONS_00034992"; exon_number |  |
| "2"; oId "CUFF.35644.2"; tss_id "TSS26354"; |   |   |   |                                                                    |  |
| chr16 Cufflinks exon54207492 54207702       | . | - | . | gene_id "XLOC_020890"; transcript_id "TCONS_00034992"; exon_number |  |
| "3"; oId "CUFF.35644.2"; tss_id "TSS26354"; |   |   |   |                                                                    |  |
| chr16 Cufflinks exon54210671 54210736       | . | - | . | gene_id "XLOC_020890"; transcript_id "TCONS_00034992"; exon_number |  |
| "4"; oId "CUFF.35644.2"; tss_id "TSS26354"; |   |   |   |                                                                    |  |
| chr16 Cufflinks exon54208611 54209567       | . | - | . | gene_id "XLOC_020890"; transcript_id "TCONS_00034996"; exon_number |  |
| "1"; oId "CUFF.35644.3"; tss_id "TSS26354"; |   |   |   |                                                                    |  |
| chr16 Cufflinks exon54210671 54210732       | . | - | . | gene_id "XLOC_020890"; transcript_id "TCONS_00034996"; exon_number |  |
| "2"; oId "CUFF.35644.3"; tss_id "TSS26354"; |   |   |   |                                                                    |  |

|       |                        |          |   |   |   |                                                                                                                |
|-------|------------------------|----------|---|---|---|----------------------------------------------------------------------------------------------------------------|
| chr16 | Cufflinks exon54279355 | 54279713 | . | - | . | gene_id "XLOC_020897"; transcript_id "TCONS_00035002"; exon_number "1"; oId "CUFF.35655.2"; tss_id "TSS26362"; |
| chr16 | Cufflinks exon54280751 | 54280874 | . | - | . | gene_id "XLOC_020897"; transcript_id "TCONS_00035002"; exon_number "2"; oId "CUFF.35655.2"; tss_id "TSS26362"; |
| chr16 | Cufflinks exon54304427 | 54304791 | . | - | . | gene_id "XLOC_020897"; transcript_id "TCONS_00035002"; exon_number "3"; oId "CUFF.35655.2"; tss_id "TSS26362"; |
| chr16 | Cufflinks exon54885563 | 54887480 | . | - | . | gene_id "XLOC_020905"; transcript_id "TCONS_00035012"; exon_number "1"; oId "CUFF.35673.4"; tss_id "TSS26371"; |
| chr16 | Cufflinks exon54895284 | 54895304 | . | - | . | gene_id "XLOC_020905"; transcript_id "TCONS_00035012"; exon_number "2"; oId "CUFF.35673.4"; tss_id "TSS26371"; |
| chr16 | Cufflinks exon54885563 | 54887480 | . | - | . | gene_id "XLOC_020905"; transcript_id "TCONS_00035013"; exon_number "1"; oId "CUFF.35673.8"; tss_id "TSS26372"; |
| chr16 | Cufflinks exon54901480 | 54901529 | . | - | . | gene_id "XLOC_020905"; transcript_id "TCONS_00035013"; exon_number "2"; oId "CUFF.35673.8"; tss_id "TSS26372"; |
| chr16 | Cufflinks exon54885563 | 54887480 | . | - | . | gene_id "XLOC_020905"; transcript_id "TCONS_00035014"; exon_number "1"; oId "CUFF.35673.2"; tss_id "TSS26373"; |
| chr16 | Cufflinks exon54907967 | 54908065 | . | - | . | gene_id "XLOC_020905"; transcript_id "TCONS_00035014"; exon_number "2"; oId "CUFF.35673.2"; tss_id "TSS26373"; |
| chr16 | Cufflinks exon54885563 | 54887480 | . | - | . | gene_id "XLOC_020905"; transcript_id "TCONS_00035015"; exon_number "1"; oId "CUFF.35673.5"; tss_id "TSS26374"; |
| chr16 | Cufflinks exon54910345 | 54910421 | . | - | . | gene_id "XLOC_020905"; transcript_id "TCONS_00035015"; exon_number "2"; oId "CUFF.35673.5"; tss_id "TSS26374"; |
| chr16 | Cufflinks exon54885563 | 54887480 | . | - | . | gene_id "XLOC_020905"; transcript_id "TCONS_00035016"; exon_number "1"; oId "CUFF.35673.3"; tss_id "TSS26375"; |
| chr16 | Cufflinks exon54906317 | 54906439 | . | - | . | gene_id "XLOC_020905"; transcript_id "TCONS_00035016"; exon_number "2"; oId "CUFF.35673.3"; tss_id "TSS26375"; |
| chr16 | Cufflinks exon54925328 | 54925577 | . | - | . | gene_id "XLOC_020905"; transcript_id "TCONS_00035016"; exon_number "3"; oId "CUFF.35673.3"; tss_id "TSS26375"; |
| chr16 | Cufflinks exon54927183 | 54927208 | . | - | . | gene_id "XLOC_020905"; transcript_id "TCONS_00035016"; exon_number "4"; oId "CUFF.35673.3"; tss_id "TSS26375"; |
| chr16 | Cufflinks exon54885563 | 54887480 | . | - | . | gene_id "XLOC_020905"; transcript_id "TCONS_00035017"; exon_number "1"; oId "CUFF.35673.6"; tss_id "TSS26375"; |
| chr16 | Cufflinks exon54925328 | 54925577 | . | - | . | gene_id "XLOC_020905"; transcript_id "TCONS_00035017"; exon_number "2"; oId "CUFF.35673.6"; tss_id "TSS26375"; |
| chr16 | Cufflinks exon54927234 | 54927265 | . | - | . | gene_id "XLOC_020905"; transcript_id "TCONS_00035017"; exon_number "3"; oId "CUFF.35673.6"; tss_id "TSS26375"; |
| chr16 | Cufflinks exon54885563 | 54887480 | . | - | . | gene_id "XLOC_020905"; transcript_id "TCONS_00035018"; exon_number "1"; oId "CUFF.35673.7"; tss_id "TSS26376"; |
| chr16 | Cufflinks exon54925314 | 54925577 | . | - | . | gene_id "XLOC_020905"; transcript_id "TCONS_00035018"; exon_number "2"; oId "CUFF.35673.7"; tss_id "TSS26376"; |
| chr16 | Cufflinks exon54927234 | 54927385 | . | - | . | gene_id "XLOC_020905"; transcript_id "TCONS_00035018"; exon_number "3"; oId "CUFF.35673.7"; tss_id "TSS26376"; |
| chr16 | Cufflinks exon54885563 | 54887480 | . | - | . | gene_id "XLOC_020905"; transcript_id "TCONS_00035019"; exon_number "1"; oId "CUFF.35673.8"; tss_id "TSS26377"; |

|                                             |       |                        |          |   |   |   |                                                                    |
|---------------------------------------------|-------|------------------------|----------|---|---|---|--------------------------------------------------------------------|
| "1"; oId "CUFF.35673.1"; tss_id "TSS26377"; | chr16 | Cufflinks exon54906317 | 54906439 | . | - | . | gene_id "XLOC_020905"; transcript_id "TCONS_00035019"; exon_number |
| "2"; oId "CUFF.35673.1"; tss_id "TSS26377"; | chr16 | Cufflinks exon54925328 | 54925577 | . | - | . | gene_id "XLOC_020905"; transcript_id "TCONS_00035019"; exon_number |
| "3"; oId "CUFF.35673.1"; tss_id "TSS26377"; | chr16 | Cufflinks exon54927234 | 54927875 | . | - | . | gene_id "XLOC_020905"; transcript_id "TCONS_00035019"; exon_number |
| "4"; oId "CUFF.35673.1"; tss_id "TSS26377"; | chr16 | Cufflinks exon54952777 | 54953121 | . | - | . | gene_id "XLOC_020911"; transcript_id "TCONS_00035027"; exon_number |
| "1"; oId "CUFF.35683.4"; tss_id "TSS26383"; | chr16 | Cufflinks exon54954210 | 54954239 | . | - | . | gene_id "XLOC_020911"; transcript_id "TCONS_00035027"; exon_number |
| "2"; oId "CUFF.35683.4"; tss_id "TSS26383"; | chr16 | Cufflinks exon54957497 | 54957562 | . | - | . | gene_id "XLOC_020911"; transcript_id "TCONS_00035027"; exon_number |
| "3"; oId "CUFF.35683.4"; tss_id "TSS26383"; | chr16 | Cufflinks exon54959013 | 54959125 | . | - | . | gene_id "XLOC_020911"; transcript_id "TCONS_00035027"; exon_number |
| "4"; oId "CUFF.35683.4"; tss_id "TSS26383"; | chr16 | Cufflinks exon54962406 | 54962690 | . | - | . | gene_id "XLOC_020911"; transcript_id "TCONS_00035027"; exon_number |
| "5"; oId "CUFF.35683.4"; tss_id "TSS26383"; | chr16 | Cufflinks exon54952777 | 54953121 | . | - | . | gene_id "XLOC_020911"; transcript_id "TCONS_00035026"; exon_number |
| "1"; oId "CUFF.35683.2"; tss_id "TSS26383"; | chr16 | Cufflinks exon54954210 | 54954250 | . | - | . | gene_id "XLOC_020911"; transcript_id "TCONS_00035026"; exon_number |
| "2"; oId "CUFF.35683.2"; tss_id "TSS26383"; | chr16 | Cufflinks exon54957497 | 54957562 | . | - | . | gene_id "XLOC_020911"; transcript_id "TCONS_00035026"; exon_number |
| "3"; oId "CUFF.35683.2"; tss_id "TSS26383"; | chr16 | Cufflinks exon54959013 | 54959125 | . | - | . | gene_id "XLOC_020911"; transcript_id "TCONS_00035026"; exon_number |
| "4"; oId "CUFF.35683.2"; tss_id "TSS26383"; | chr16 | Cufflinks exon54962406 | 54962690 | . | - | . | gene_id "XLOC_020911"; transcript_id "TCONS_00035026"; exon_number |
| "5"; oId "CUFF.35683.2"; tss_id "TSS26383"; | chr16 | Cufflinks exon54952777 | 54953121 | . | - | . | gene_id "XLOC_020911"; transcript_id "TCONS_00035025"; exon_number |
| "1"; oId "CUFF.35683.1"; tss_id "TSS26383"; | chr16 | Cufflinks exon54954210 | 54954322 | . | - | . | gene_id "XLOC_020911"; transcript_id "TCONS_00035025"; exon_number |
| "2"; oId "CUFF.35683.1"; tss_id "TSS26383"; | chr16 | Cufflinks exon54957497 | 54957562 | . | - | . | gene_id "XLOC_020911"; transcript_id "TCONS_00035025"; exon_number |
| "3"; oId "CUFF.35683.1"; tss_id "TSS26383"; | chr16 | Cufflinks exon54959013 | 54959125 | . | - | . | gene_id "XLOC_020911"; transcript_id "TCONS_00035025"; exon_number |
| "4"; oId "CUFF.35683.1"; tss_id "TSS26383"; | chr16 | Cufflinks exon54962406 | 54962690 | . | - | . | gene_id "XLOC_020911"; transcript_id "TCONS_00035025"; exon_number |
| "5"; oId "CUFF.35683.1"; tss_id "TSS26383"; | chr16 | Cufflinks exon54952777 | 54953121 | . | - | . | gene_id "XLOC_020911"; transcript_id "TCONS_00035028"; exon_number |
| "1"; oId "CUFF.35683.3"; tss_id "TSS26384"; | chr16 | Cufflinks exon54954210 | 54954322 | . | - | . | gene_id "XLOC_020911"; transcript_id "TCONS_00035028"; exon_number |
| "2"; oId "CUFF.35683.3"; tss_id "TSS26384"; | chr16 | Cufflinks exon54957497 | 54957562 | . | - | . | gene_id "XLOC_020911"; transcript_id "TCONS_00035028"; exon_number |
| "3"; oId "CUFF.35683.3"; tss_id "TSS26384"; |       |                        |          |   |   |   |                                                                    |



|       |                |          |          |   |   |   |                                                                                                                |
|-------|----------------|----------|----------|---|---|---|----------------------------------------------------------------------------------------------------------------|
| chr16 | Cufflinks exon | 54959013 | 54959125 | . | - | . | gene_id "XLOC_020911"; transcript_id "TCONS_00035028"; exon_number "4"; oId "CUFF.35683.3"; tss_id "TSS26384"; |
| chr16 | Cufflinks exon | 54962682 | 54963101 | . | - | . | gene_id "XLOC_020911"; transcript_id "TCONS_00035028"; exon_number "5"; oId "CUFF.35683.3"; tss_id "TSS26384"; |
| chr16 | Cufflinks exon | 55011537 | 55013158 | . | - | . | gene_id "XLOC_020916"; transcript_id "TCONS_00035033"; exon_number "1"; oId "CUFF.35694.1"; tss_id "TSS26389"; |
| chr16 | Cufflinks exon | 55013249 | 55013347 | . | - | . | gene_id "XLOC_020916"; transcript_id "TCONS_00035033"; exon_number "2"; oId "CUFF.35694.1"; tss_id "TSS26389"; |
| chr16 | Cufflinks exon | 57448266 | 57448607 | . | - | . | gene_id "XLOC_020938"; transcript_id "TCONS_00035071"; exon_number "1"; oId "CUFF.35777.2"; tss_id "TSS26419"; |
| chr16 | Cufflinks exon | 57449750 | 57450745 | . | - | . | gene_id "XLOC_020938"; transcript_id "TCONS_00035071"; exon_number "2"; oId "CUFF.35777.2"; tss_id "TSS26419"; |
| chr16 | Cufflinks exon | 57448266 | 57448607 | . | - | . | gene_id "XLOC_020938"; transcript_id "TCONS_00035072"; exon_number "1"; oId "CUFF.35777.1"; tss_id "TSS26420"; |
| chr16 | Cufflinks exon | 57450427 | 57451239 | . | - | . | gene_id "XLOC_020938"; transcript_id "TCONS_00035072"; exon_number "2"; oId "CUFF.35777.1"; tss_id "TSS26420"; |
| chr16 | Cufflinks exon | 57714801 | 57720732 | . | - | . | gene_id "XLOC_020945"; transcript_id "TCONS_00035084"; exon_number "1"; oId "CUFF.35797.3"; tss_id "TSS26430"; |
| chr16 | Cufflinks exon | 57722673 | 57723674 | . | - | . | gene_id "XLOC_020945"; transcript_id "TCONS_00035084"; exon_number "2"; oId "CUFF.35797.3"; tss_id "TSS26430"; |
| chr16 | Cufflinks exon | 70349532 | 70350045 | . | - | . | gene_id "XLOC_021060"; transcript_id "TCONS_00035301"; exon_number "1"; oId "CUFF.36179.3"; tss_id "TSS26586"; |
| chr16 | Cufflinks exon | 70351159 | 70351276 | . | - | . | gene_id "XLOC_021060"; transcript_id "TCONS_00035301"; exon_number "2"; oId "CUFF.36179.3"; tss_id "TSS26586"; |
| chr16 | Cufflinks exon | 70367723 | 70367863 | . | - | . | gene_id "XLOC_021060"; transcript_id "TCONS_00035301"; exon_number "3"; oId "CUFF.36179.3"; tss_id "TSS26586"; |
| chr16 | Cufflinks exon | 70375843 | 70376002 | . | - | . | gene_id "XLOC_021060"; transcript_id "TCONS_00035301"; exon_number "4"; oId "CUFF.36179.3"; tss_id "TSS26586"; |
| chr16 | Cufflinks exon | 70380102 | 70380650 | . | - | . | gene_id "XLOC_021060"; transcript_id "TCONS_00035301"; exon_number "5"; oId "CUFF.36179.3"; tss_id "TSS26586"; |
| chr16 | Cufflinks exon | 70349532 | 70350045 | . | - | . | gene_id "XLOC_021060"; transcript_id "TCONS_00035302"; exon_number "1"; oId "CUFF.36179.1"; tss_id "TSS26586"; |
| chr16 | Cufflinks exon | 70351159 | 70351276 | . | - | . | gene_id "XLOC_021060"; transcript_id "TCONS_00035302"; exon_number "2"; oId "CUFF.36179.1"; tss_id "TSS26586"; |
| chr16 | Cufflinks exon | 70363166 | 70363541 | . | - | . | gene_id "XLOC_021060"; transcript_id "TCONS_00035302"; exon_number "3"; oId "CUFF.36179.1"; tss_id "TSS26586"; |
| chr16 | Cufflinks exon | 70367723 | 70367863 | . | - | . | gene_id "XLOC_021060"; transcript_id "TCONS_00035302"; exon_number "4"; oId "CUFF.36179.1"; tss_id "TSS26586"; |
| chr16 | Cufflinks exon | 70375843 | 70376002 | . | - | . | gene_id "XLOC_021060"; transcript_id "TCONS_00035302"; exon_number "5"; oId "CUFF.36179.1"; tss_id "TSS26586"; |
| chr16 | Cufflinks exon | 70380102 | 70380686 | . | - | . | gene_id "XLOC_021060"; transcript_id "TCONS_00035302"; exon_number "6"; oId "CUFF.36179.1"; tss_id "TSS26586"; |
| chr16 | Cufflinks exon | 70349532 | 70350045 | . | - | . | gene_id "XLOC_021060"; transcript_id "TCONS_00035303"; exon_number                                             |

"1"; oId "CUFF.36179.2"; tss\_id "TSS26586";  
chr16 Cufflinks exon70351159 70351276 . - . gene\_id "XLOC\_021060"; transcript\_id "TCONS\_00035303"; exon\_number  
"2"; oId "CUFF.36179.2"; tss\_id "TSS26586";  
chr16 Cufflinks exon70363166 70363541 . - . gene\_id "XLOC\_021060"; transcript\_id "TCONS\_00035303"; exon\_number  
"3"; oId "CUFF.36179.2"; tss\_id "TSS26586";  
chr16 Cufflinks exon70367723 70367863 . - . gene\_id "XLOC\_021060"; transcript\_id "TCONS\_00035303"; exon\_number  
"4"; oId "CUFF.36179.2"; tss\_id "TSS26586";  
chr16 Cufflinks exon70380102 70380724 . - . gene\_id "XLOC\_021060"; transcript\_id "TCONS\_00035303"; exon\_number  
"5"; oId "CUFF.36179.2"; tss\_id "TSS26586";  
chr16 Cufflinks exon70356266 70356325 . - . gene\_id "XLOC\_021060"; transcript\_id "TCONS\_00035304"; exon\_number  
"1"; oId "CUFF.36179.4"; tss\_id "TSS26586";  
chr16 Cufflinks exon70367723 70367863 . - . gene\_id "XLOC\_021060"; transcript\_id "TCONS\_00035304"; exon\_number  
"2"; oId "CUFF.36179.4"; tss\_id "TSS26586";  
chr16 Cufflinks exon70375843 70376002 . - . gene\_id "XLOC\_021060"; transcript\_id "TCONS\_00035304"; exon\_number  
"3"; oId "CUFF.36179.4"; tss\_id "TSS26586";  
chr16 Cufflinks exon70380102 70380686 . - . gene\_id "XLOC\_021060"; transcript\_id "TCONS\_00035304"; exon\_number  
"4"; oId "CUFF.36179.4"; tss\_id "TSS26586";  
chr16 Cufflinks exon 70366984 70367037 . - . gene\_id "XLOC\_021060"; transcript\_id "TCONS\_00035305";  
exon\_number "1"; oId "CUFF.36179.5"; tss\_id "TSS26586";  
chr16 Cufflinks exon 70367723 70367863 . - . gene\_id "XLOC\_021060"; transcript\_id "TCONS\_00035305";  
exon\_number "2"; oId "CUFF.36179.5"; tss\_id "TSS26586";  
chr16 Cufflinks exon 70375843 70376002 . - . gene\_id "XLOC\_021060"; transcript\_id "TCONS\_00035305";  
exon\_number "3"; oId "CUFF.36179.5"; tss\_id "TSS26586";  
chr16 Cufflinks exon 70380102 70380702 . - . gene\_id "XLOC\_021060"; transcript\_id "TCONS\_00035305";  
exon\_number "4"; oId "CUFF.36179.5"; tss\_id "TSS26586";  
chr16 Cufflinks exon 72047889 72061994 . - . gene\_id "XLOC\_021085"; transcript\_id "TCONS\_00035380";  
exon\_number "1"; oId "CUFF.36257.3"; tss\_id "TSS26632";  
chr16 Cufflinks exon 72069745 72069892 . - . gene\_id "XLOC\_021085"; transcript\_id "TCONS\_00035380";  
exon\_number "2"; oId "CUFF.36257.3"; tss\_id "TSS26632";  
chr16 Cufflinks exon 72070009 72070994 . - . gene\_id "XLOC\_021085"; transcript\_id "TCONS\_00035380";  
exon\_number "3"; oId "CUFF.36257.3"; tss\_id "TSS26632";  
chr16 Cufflinks exon 72047889 72056703 . - . gene\_id "XLOC\_021085"; transcript\_id "TCONS\_00035379";  
exon\_number "1"; oId "CUFF.36257.2"; tss\_id "TSS26632";  
chr16 Cufflinks exon 72057213 72058339 . - . gene\_id "XLOC\_021085"; transcript\_id "TCONS\_00035379";  
exon\_number "2"; oId "CUFF.36257.2"; tss\_id "TSS26632";  
chr16 Cufflinks exon 72061838 72061994 . - . gene\_id "XLOC\_021085"; transcript\_id "TCONS\_00035379";  
exon\_number "3"; oId "CUFF.36257.2"; tss\_id "TSS26632";  
chr16 Cufflinks exon 72069745 72069892 . - . gene\_id "XLOC\_021085"; transcript\_id "TCONS\_00035379";  
exon\_number "4"; oId "CUFF.36257.2"; tss\_id "TSS26632";  
chr16 Cufflinks exon 72070009 72070994 . - . gene\_id "XLOC\_021085"; transcript\_id "TCONS\_00035379"; exon\_number  
"5"; oId "CUFF.36257.2"; tss\_id "TSS26632";  
chr16 Cufflinks exon72047889 72057654 . - . gene\_id "XLOC\_021085"; transcript\_id "TCONS\_00035381"; exon\_number  
"1"; oId "CUFF.36257.1"; tss\_id "TSS26633";

|       |                |          |          |   |   |   |                                                                                                                 |
|-------|----------------|----------|----------|---|---|---|-----------------------------------------------------------------------------------------------------------------|
| chr16 | Cufflinks exon | 72057885 | 72061994 | . | - | . | gene_id "XLOC_021085"; transcript_id "TCONS_00035381"; exon_number "2"; oId "CUFF.36257.1"; tss_id "TSS26633";  |
| chr16 | Cufflinks exon | 72078160 | 72078239 | . | - | . | gene_id "XLOC_021085"; transcript_id "TCONS_00035381"; exon_number "3"; oId "CUFF.36257.1"; tss_id "TSS26633";  |
| chr16 | Cufflinks exon | 72301995 | 72302965 | . | - | . | gene_id "XLOC_021117"; transcript_id "TCONS_00035416"; exon_number "1"; oId "CUFF.36307.2"; tss_id "TSS26668";  |
| chr16 | Cufflinks exon | 72318471 | 72318659 | . | - | . | gene_id "XLOC_021117"; transcript_id "TCONS_00035416"; exon_number "2"; oId "CUFF.36307.2"; tss_id "TSS26668";  |
| chr16 | Cufflinks exon | 72319278 | 72319352 | . | - | . | gene_id "XLOC_021117"; transcript_id "TCONS_00035416"; exon_number "3"; oId "CUFF.36307.2"; tss_id "TSS26668";  |
| chr16 | Cufflinks exon | 72324349 | 72324506 | . | - | . | gene_id "XLOC_021117"; transcript_id "TCONS_00035416"; exon_number "4"; oId "CUFF.36307.2"; tss_id "TSS26668";  |
| chr16 | Cufflinks exon | 72325069 | 72325312 | . | - | . | gene_id "XLOC_021117"; transcript_id "TCONS_00035416"; exon_number "5"; oId "CUFF.36307.2"; tss_id "TSS26668";  |
| chr16 | Cufflinks exon | 72341955 | 72342087 | . | - | . | gene_id "XLOC_021117"; transcript_id "TCONS_00035416"; exon_number "6"; oId "CUFF.36307.2"; tss_id "TSS26668";  |
| chr16 | Cufflinks exon | 72382945 | 72383105 | . | - | . | gene_id "XLOC_021117"; transcript_id "TCONS_00035416"; exon_number "7"; oId "CUFF.36307.2"; tss_id "TSS26668";  |
| chr16 | Cufflinks exon | 72402552 | 72402621 | . | - | . | gene_id "XLOC_021117"; transcript_id "TCONS_00035416"; exon_number "8"; oId "CUFF.36307.2"; tss_id "TSS26668";  |
| chr16 | Cufflinks exon | 72461289 | 72461356 | . | - | . | gene_id "XLOC_021117"; transcript_id "TCONS_00035416"; exon_number "9"; oId "CUFF.36307.2"; tss_id "TSS26668";  |
| chr16 | Cufflinks exon | 72556452 | 72556522 | . | - | . | gene_id "XLOC_021117"; transcript_id "TCONS_00035416"; exon_number "10"; oId "CUFF.36307.2"; tss_id "TSS26668"; |
| chr16 | Cufflinks exon | 72557231 | 72557314 | . | - | . | gene_id "XLOC_021117"; transcript_id "TCONS_00035416"; exon_number "11"; oId "CUFF.36307.2"; tss_id "TSS26668"; |
| chr16 | Cufflinks exon | 72574477 | 72574510 | . | - | . | gene_id "XLOC_021117"; transcript_id "TCONS_00035416"; exon_number "12"; oId "CUFF.36307.2"; tss_id "TSS26668"; |
| chr16 | Cufflinks exon | 72589164 | 72589225 | . | - | . | gene_id "XLOC_021117"; transcript_id "TCONS_00035416"; exon_number "13"; oId "CUFF.36307.2"; tss_id "TSS26668"; |
| chr16 | Cufflinks exon | 72595872 | 72595985 | . | - | . | gene_id "XLOC_021117"; transcript_id "TCONS_00035416"; exon_number "14"; oId "CUFF.36307.2"; tss_id "TSS26668"; |
| chr16 | Cufflinks exon | 72698791 | 72698908 | . | - | . | gene_id "XLOC_021117"; transcript_id "TCONS_00035416"; exon_number "15"; oId "CUFF.36307.2"; tss_id "TSS26668"; |
| chr16 | Cufflinks exon | 72317200 | 72317533 | . | - | . | gene_id "XLOC_021117"; transcript_id "TCONS_00035418"; exon_number "1"; oId "CUFF.36307.3"; tss_id "TSS26668";  |
| chr16 | Cufflinks exon | 72318471 | 72318659 | . | - | . | gene_id "XLOC_021117"; transcript_id "TCONS_00035418"; exon_number "2"; oId "CUFF.36307.3"; tss_id "TSS26668";  |
| chr16 | Cufflinks exon | 72319278 | 72319352 | . | - | . | gene_id "XLOC_021117"; transcript_id "TCONS_00035418"; exon_number "3"; oId "CUFF.36307.3"; tss_id "TSS26668";  |
| chr16 | Cufflinks exon | 72324349 | 72324506 | . | - | . | gene_id "XLOC_021117"; transcript_id "TCONS_00035418"; exon_number "4"; oId "CUFF.36307.3"; tss_id "TSS26668";  |
| chr16 | Cufflinks exon | 72325069 | 72325312 | . | - | . | gene_id "XLOC_021117"; transcript_id "TCONS_00035418"; exon_number "5"; oId "CUFF.36307.3"; tss_id "TSS26668";  |

"5"; oId "CUFF.36307.3"; tss\_id "TSS26668";  
chr16 Cufflinks exon72382966 72383105 . - . gene\_id "XLOC\_021117"; transcript\_id "TCONS\_00035418"; exon\_number  
"6"; oId "CUFF.36307.3"; tss\_id "TSS26668";  
chr16 Cufflinks exon72402552 72402621 . - . gene\_id "XLOC\_021117"; transcript\_id "TCONS\_00035418"; exon\_number  
"7"; oId "CUFF.36307.3"; tss\_id "TSS26668";  
chr16 Cufflinks exon72461289 72461356 . - . gene\_id "XLOC\_021117"; transcript\_id "TCONS\_00035418"; exon\_number  
"8"; oId "CUFF.36307.3"; tss\_id "TSS26668";  
chr16 Cufflinks exon72556452 72556522 . - . gene\_id "XLOC\_021117"; transcript\_id "TCONS\_00035418"; exon\_number  
"9"; oId "CUFF.36307.3"; tss\_id "TSS26668";  
chr16 Cufflinks exon72557231 72557314 . - . gene\_id "XLOC\_021117"; transcript\_id "TCONS\_00035418"; exon\_number  
"10"; oId "CUFF.36307.3"; tss\_id "TSS26668";  
chr16 Cufflinks exon72574477 72574510 . - . gene\_id "XLOC\_021117"; transcript\_id "TCONS\_00035418"; exon\_number  
"11"; oId "CUFF.36307.3"; tss\_id "TSS26668";  
chr16 Cufflinks exon72589164 72589225 . - . gene\_id "XLOC\_021117"; transcript\_id "TCONS\_00035418"; exon\_number  
"12"; oId "CUFF.36307.3"; tss\_id "TSS26668";  
chr16 Cufflinks exon72604334 72604414 . - . gene\_id "XLOC\_021117"; transcript\_id "TCONS\_00035418"; exon\_number  
"13"; oId "CUFF.36307.3"; tss\_id "TSS26668";  
chr16 Cufflinks exon72698791 72698908 . - . gene\_id "XLOC\_021117"; transcript\_id "TCONS\_00035418"; exon\_number  
"14"; oId "CUFF.36307.3"; tss\_id "TSS26668";  
chr16 Cufflinks exon72459273 72460169 . - . gene\_id "XLOC\_021117"; transcript\_id "TCONS\_00035422"; exon\_number  
"1"; oId "CUFF.36307.6"; tss\_id "TSS26668";  
chr16 Cufflinks exon72461289 72461356 . - . gene\_id "XLOC\_021117"; transcript\_id "TCONS\_00035422"; exon\_number  
"2"; oId "CUFF.36307.6"; tss\_id "TSS26668";  
chr16 Cufflinks exon72557231 72557314 . - . gene\_id "XLOC\_021117"; transcript\_id "TCONS\_00035422"; exon\_number  
"3"; oId "CUFF.36307.6"; tss\_id "TSS26668";  
chr16 Cufflinks exon72574477 72574510 . - . gene\_id "XLOC\_021117"; transcript\_id "TCONS\_00035422"; exon\_number  
"4"; oId "CUFF.36307.6"; tss\_id "TSS26668";  
chr16 Cufflinks exon72589164 72589225 . - . gene\_id "XLOC\_021117"; transcript\_id "TCONS\_00035422"; exon\_number  
"5"; oId "CUFF.36307.6"; tss\_id "TSS26668";  
chr16 Cufflinks exon72595872 72595985 . - . gene\_id "XLOC\_021117"; transcript\_id "TCONS\_00035422"; exon\_number  
"6"; oId "CUFF.36307.6"; tss\_id "TSS26668";  
chr16 Cufflinks exon72604350 72604414 . - . gene\_id "XLOC\_021117"; transcript\_id "TCONS\_00035422"; exon\_number  
"7"; oId "CUFF.36307.6"; tss\_id "TSS26668";  
chr16 Cufflinks exon72698791 72698908 . - . gene\_id "XLOC\_021117"; transcript\_id "TCONS\_00035422"; exon\_number  
"8"; oId "CUFF.36307.6"; tss\_id "TSS26668";  
chr16 Cufflinks exon79692151 79692251 . - . gene\_id "XLOC\_021177"; transcript\_id "TCONS\_00035509"; exon\_number  
"1"; oId "CUFF.36559.1"; tss\_id "TSS26740";  
chr16 Cufflinks exon79692345 79692689 . - . gene\_id "XLOC\_021177"; transcript\_id "TCONS\_00035509"; exon\_number  
"2"; oId "CUFF.36559.1"; tss\_id "TSS26740";  
chr16 Cufflinks exon85478997 85482021 . - . gene\_id "XLOC\_021244"; transcript\_id "TCONS\_00035609"; exon\_number  
"1"; oId "CUFF.36732.1"; tss\_id "TSS26821";  
chr16 Cufflinks exon85482171 85483396 . - . gene\_id "XLOC\_021244"; transcript\_id "TCONS\_00035609"; exon\_number  
"2"; oId "CUFF.36732.1"; tss\_id "TSS26821";

|       |                        |          |   |   |   |                                                                                                                |
|-------|------------------------|----------|---|---|---|----------------------------------------------------------------------------------------------------------------|
| chr16 | Cufflinks exon85486250 | 85486714 | . | - | . | gene_id "XLOC_021244"; transcript_id "TCONS_00035609"; exon_number "3"; oId "CUFF.36732.1"; tss_id "TSS26821"; |
| chr16 | Cufflinks exon85496864 | 85496916 | . | - | . | gene_id "XLOC_021244"; transcript_id "TCONS_00035609"; exon_number "4"; oId "CUFF.36732.1"; tss_id "TSS26821"; |
| chr16 | Cufflinks exon85485635 | 85486714 | . | - | . | gene_id "XLOC_021244"; transcript_id "TCONS_00035610"; exon_number "1"; oId "CUFF.36732.2"; tss_id "TSS26822"; |
| chr16 | Cufflinks exon85496879 | 85497097 | . | - | . | gene_id "XLOC_021244"; transcript_id "TCONS_00035610"; exon_number "2"; oId "CUFF.36732.2"; tss_id "TSS26822"; |
| chr16 | Cufflinks exon85586634 | 85588958 | . | - | . | gene_id "XLOC_021248"; transcript_id "TCONS_00035614"; exon_number "1"; oId "CUFF.36787.2"; tss_id "TSS26826"; |
| chr16 | Cufflinks exon85589667 | 85590001 | . | - | . | gene_id "XLOC_021248"; transcript_id "TCONS_00035614"; exon_number "2"; oId "CUFF.36787.2"; tss_id "TSS26826"; |
| chr16 | Cufflinks exon85586634 | 85589171 | . | - | . | gene_id "XLOC_021248"; transcript_id "TCONS_00035615"; exon_number "1"; oId "CUFF.36787.1"; tss_id "TSS26827"; |
| chr16 | Cufflinks exon85589199 | 85590567 | . | - | . | gene_id "XLOC_021248"; transcript_id "TCONS_00035615"; exon_number "2"; oId "CUFF.36787.1"; tss_id "TSS26827"; |
| chr16 | Cufflinks exon87799937 | 87800030 | . | - | . | gene_id "XLOC_021275"; transcript_id "TCONS_00035668"; exon_number "1"; oId "CUFF.36882.9"; tss_id "TSS26861"; |
| chr16 | Cufflinks exon87806997 | 87807195 | . | - | . | gene_id "XLOC_021275"; transcript_id "TCONS_00035668"; exon_number "2"; oId "CUFF.36882.9"; tss_id "TSS26861"; |
| chr16 | Cufflinks exon87811474 | 87811606 | . | - | . | gene_id "XLOC_021275"; transcript_id "TCONS_00035668"; exon_number "3"; oId "CUFF.36882.9"; tss_id "TSS26861"; |
| chr16 | Cufflinks exon87812414 | 87812754 | . | - | . | gene_id "XLOC_021275"; transcript_id "TCONS_00035668"; exon_number "4"; oId "CUFF.36882.9"; tss_id "TSS26861"; |
| chr16 | Cufflinks exon88489950 | 88490724 | . | - | . | gene_id "XLOC_021292"; transcript_id "TCONS_00035687"; exon_number "1"; oId "CUFF.36931.1"; tss_id "TSS26883"; |
| chr16 | Cufflinks exon88496372 | 88496530 | . | - | . | gene_id "XLOC_021292"; transcript_id "TCONS_00035687"; exon_number "2"; oId "CUFF.36931.1"; tss_id "TSS26883"; |
| chr16 | Cufflinks exon88496680 | 88497383 | . | - | . | gene_id "XLOC_021292"; transcript_id "TCONS_00035687"; exon_number "3"; oId "CUFF.36931.1"; tss_id "TSS26883"; |
| chr16 | Cufflinks exon89558499 | 89559041 | . | - | . | gene_id "XLOC_021334"; transcript_id "TCONS_00035764"; exon_number "1"; oId "CUFF.37034.1"; tss_id "TSS26942"; |
| chr16 | Cufflinks exon89570615 | 89570719 | . | - | . | gene_id "XLOC_021334"; transcript_id "TCONS_00035764"; exon_number "2"; oId "CUFF.37034.1"; tss_id "TSS26942"; |
| chr16 | Cufflinks exon89571453 | 89571561 | . | - | . | gene_id "XLOC_021334"; transcript_id "TCONS_00035764"; exon_number "3"; oId "CUFF.37034.1"; tss_id "TSS26942"; |
| chr16 | Cufflinks exon89571657 | 89574695 | . | - | . | gene_id "XLOC_021334"; transcript_id "TCONS_00035764"; exon_number "4"; oId "CUFF.37034.1"; tss_id "TSS26942"; |
| chr16 | Cufflinks exon89570536 | 89570736 | . | - | . | gene_id "XLOC_021334"; transcript_id "TCONS_00035766"; exon_number "1"; oId "CUFF.37034.2"; tss_id "TSS26943"; |
| chr16 | Cufflinks exon89571453 | 89572735 | . | - | . | gene_id "XLOC_021334"; transcript_id "TCONS_00035766"; exon_number "2"; oId "CUFF.37034.2"; tss_id "TSS26943"; |
| chr16 | Cufflinks exon89668182 | 89668733 | . | - | . | gene_id "XLOC_021336"; transcript_id "TCONS_00035768"; exon_number                                             |

"1"; oId "CUFF.37056.4"; tss\_id "TSS26946";  
chr16 Cufflinks exon89671711 89671800 . - . gene\_id "XLOC\_021336"; transcript\_id "TCONS\_00035768"; exon\_number  
"2"; oId "CUFF.37056.4"; tss\_id "TSS26946";  
chr16 Cufflinks exon89672325 89672529 . - . gene\_id "XLOC\_021336"; transcript\_id "TCONS\_00035768"; exon\_number  
"3"; oId "CUFF.37056.4"; tss\_id "TSS26946";  
chr16 Cufflinks exon89668182 89668733 . - . gene\_id "XLOC\_021336"; transcript\_id "TCONS\_00035769"; exon\_number  
"1"; oId "CUFF.37056.1"; tss\_id "TSS26947";  
chr16 Cufflinks exon89671711 89671940 . - . gene\_id "XLOC\_021336"; transcript\_id "TCONS\_00035769"; exon\_number  
"2"; oId "CUFF.37056.1"; tss\_id "TSS26947";  
chr16 Cufflinks exon89672325 89672897 . - . gene\_id "XLOC\_021336"; transcript\_id "TCONS\_00035769"; exon\_number  
"3"; oId "CUFF.37056.1"; tss\_id "TSS26947";  
chr17 Cufflinks exon1420213 1420387 . + . gene\_id "XLOC\_021379"; transcript\_id "TCONS\_00035827"; exon\_number "1"; oId  
"CUFF.37204.1"; tss\_id "TSS26996";  
chr17 Cufflinks exon1421012 1421390 . + . gene\_id "XLOC\_021379"; transcript\_id "TCONS\_00035827"; exon\_number "2"; oId  
"CUFF.37204.1"; tss\_id "TSS26996";  
chr17 Cufflinks exon2615132 2615482 . + . gene\_id "XLOC\_021399"; transcript\_id "TCONS\_00035863"; exon\_number "1"; oId  
"CUFF.37275.1"; tss\_id "TSS27022";  
chr17 Cufflinks exon2615776 2616854 . + . gene\_id "XLOC\_021399"; transcript\_id "TCONS\_00035863"; exon\_number "2"; oId  
"CUFF.37275.1"; tss\_id "TSS27022";  
chr17 Cufflinks exon2615183 2615693 . + . gene\_id "XLOC\_021399"; transcript\_id "TCONS\_00035864"; exon\_number "1"; oId  
"CUFF.37275.2"; tss\_id "TSS27022";  
chr17 Cufflinks exon2615776 2616854 . + . gene\_id "XLOC\_021399"; transcript\_id "TCONS\_00035864"; exon\_number "2"; oId  
"CUFF.37275.2"; tss\_id "TSS27022";  
chr17 Cufflinks exon4469063 4469149 . + . gene\_id "XLOC\_021423"; transcript\_id "TCONS\_00035897"; exon\_number "1"; oId  
"CUFF.37371.1"; tss\_id "TSS27049";  
chr17 Cufflinks exon4474622 4476812 . + . gene\_id "XLOC\_021423"; transcript\_id "TCONS\_00035897"; exon\_number "2"; oId  
"CUFF.37371.1"; tss\_id "TSS27049";  
chr17 Cufflinks exon5095293 5095458 . + . gene\_id "XLOC\_021445"; transcript\_id "TCONS\_00035941"; exon\_number "1"; oId  
"CUFF.37448.1"; tss\_id "TSS27076";  
chr17 Cufflinks exon5117345 5117504 . + . gene\_id "XLOC\_021445"; transcript\_id "TCONS\_00035941"; exon\_number "2"; oId  
"CUFF.37448.1"; tss\_id "TSS27076";  
chr17 Cufflinks exon5118442 5118588 . + . gene\_id "XLOC\_021445"; transcript\_id "TCONS\_00035941"; exon\_number "3"; oId  
"CUFF.37448.1"; tss\_id "TSS27076";  
chr17 Cufflinks exon5126612 5126779 . + . gene\_id "XLOC\_021445"; transcript\_id "TCONS\_00035941"; exon\_number "4"; oId  
"CUFF.37448.1"; tss\_id "TSS27076";  
chr17 Cufflinks exon5137119 5137237 . + . gene\_id "XLOC\_021445"; transcript\_id "TCONS\_00035941"; exon\_number "5"; oId  
"CUFF.37448.1"; tss\_id "TSS27076";  
chr17 Cufflinks exon5137888 5138106 . + . gene\_id "XLOC\_021445"; transcript\_id "TCONS\_00035941"; exon\_number "6"; oId  
"CUFF.37448.1"; tss\_id "TSS27076";  
chr17 Cufflinks exon5138243 5139280 . + . gene\_id "XLOC\_021445"; transcript\_id "TCONS\_00035941"; exon\_number "7"; oId  
"CUFF.37448.1"; tss\_id "TSS27076";  
chr17 Cufflinks exon5095299 5095458 . + . gene\_id "XLOC\_021445"; transcript\_id "TCONS\_00035942"; exon\_number "1"; oId  
"CUFF.37448.2"; tss\_id "TSS27076";

|       |                |         |         |   |   |   |                                                                                                                |
|-------|----------------|---------|---------|---|---|---|----------------------------------------------------------------------------------------------------------------|
| chr17 | Cufflinks exon | 5117345 | 5117504 | . | + | . | gene_id "XLOC_021445"; transcript_id "TCONS_00035942"; exon_number "2"; oId "CUFF.37448.2"; tss_id "TSS27076"; |
| chr17 | Cufflinks exon | 5118442 | 5118588 | . | + | . | gene_id "XLOC_021445"; transcript_id "TCONS_00035942"; exon_number "3"; oId "CUFF.37448.2"; tss_id "TSS27076"; |
| chr17 | Cufflinks exon | 5126612 | 5126779 | . | + | . | gene_id "XLOC_021445"; transcript_id "TCONS_00035942"; exon_number "4"; oId "CUFF.37448.2"; tss_id "TSS27076"; |
| chr17 | Cufflinks exon | 5134765 | 5135073 | . | + | . | gene_id "XLOC_021445"; transcript_id "TCONS_00035942"; exon_number "5"; oId "CUFF.37448.2"; tss_id "TSS27076"; |
| chr17 | Cufflinks exon | 5095299 | 5095458 | . | + | . | gene_id "XLOC_021445"; transcript_id "TCONS_00035943"; exon_number "1"; oId "CUFF.37448.3"; tss_id "TSS27076"; |
| chr17 | Cufflinks exon | 5113045 | 5113190 | . | + | . | gene_id "XLOC_021445"; transcript_id "TCONS_00035943"; exon_number "2"; oId "CUFF.37448.3"; tss_id "TSS27076"; |
| chr17 | Cufflinks exon | 5117345 | 5117504 | . | + | . | gene_id "XLOC_021445"; transcript_id "TCONS_00035943"; exon_number "3"; oId "CUFF.37448.3"; tss_id "TSS27076"; |
| chr17 | Cufflinks exon | 5118442 | 5118588 | . | + | . | gene_id "XLOC_021445"; transcript_id "TCONS_00035943"; exon_number "4"; oId "CUFF.37448.3"; tss_id "TSS27076"; |
| chr17 | Cufflinks exon | 5126612 | 5126779 | . | + | . | gene_id "XLOC_021445"; transcript_id "TCONS_00035943"; exon_number "5"; oId "CUFF.37448.3"; tss_id "TSS27076"; |
| chr17 | Cufflinks exon | 5137119 | 5137237 | . | + | . | gene_id "XLOC_021445"; transcript_id "TCONS_00035943"; exon_number "6"; oId "CUFF.37448.3"; tss_id "TSS27076"; |
| chr17 | Cufflinks exon | 5137888 | 5138106 | . | + | . | gene_id "XLOC_021445"; transcript_id "TCONS_00035943"; exon_number "7"; oId "CUFF.37448.3"; tss_id "TSS27076"; |
| chr17 | Cufflinks exon | 5138243 | 5138497 | . | + | . | gene_id "XLOC_021445"; transcript_id "TCONS_00035943"; exon_number "8"; oId "CUFF.37448.3"; tss_id "TSS27076"; |
| chr17 | Cufflinks exon | 5143202 | 5143402 | . | + | . | gene_id "XLOC_021445"; transcript_id "TCONS_00035943"; exon_number "9"; oId "CUFF.37448.3"; tss_id "TSS27076"; |
| chr17 | Cufflinks exon | 5095303 | 5095458 | . | + | . | gene_id "XLOC_021445"; transcript_id "TCONS_00035944"; exon_number "1"; oId "CUFF.37448.4"; tss_id "TSS27076"; |
| chr17 | Cufflinks exon | 5113045 | 5113190 | . | + | . | gene_id "XLOC_021445"; transcript_id "TCONS_00035944"; exon_number "2"; oId "CUFF.37448.4"; tss_id "TSS27076"; |
| chr17 | Cufflinks exon | 5117345 | 5117504 | . | + | . | gene_id "XLOC_021445"; transcript_id "TCONS_00035944"; exon_number "3"; oId "CUFF.37448.4"; tss_id "TSS27076"; |
| chr17 | Cufflinks exon | 5118442 | 5118588 | . | + | . | gene_id "XLOC_021445"; transcript_id "TCONS_00035944"; exon_number "4"; oId "CUFF.37448.4"; tss_id "TSS27076"; |
| chr17 | Cufflinks exon | 5126612 | 5126779 | . | + | . | gene_id "XLOC_021445"; transcript_id "TCONS_00035944"; exon_number "5"; oId "CUFF.37448.4"; tss_id "TSS27076"; |
| chr17 | Cufflinks exon | 5143202 | 5143402 | . | + | . | gene_id "XLOC_021445"; transcript_id "TCONS_00035944"; exon_number "6"; oId "CUFF.37448.4"; tss_id "TSS27076"; |
| chr17 | Cufflinks exon | 5095314 | 5095458 | . | + | . | gene_id "XLOC_021445"; transcript_id "TCONS_00035945"; exon_number "1"; oId "CUFF.37448.6"; tss_id "TSS27076"; |
| chr17 | Cufflinks exon | 5113045 | 5113190 | . | + | . | gene_id "XLOC_021445"; transcript_id "TCONS_00035945"; exon_number "2"; oId "CUFF.37448.6"; tss_id "TSS27076"; |
| chr17 | Cufflinks exon | 5117345 | 5117504 | . | + | . | gene_id "XLOC_021445"; transcript_id "TCONS_00035945"; exon_number "3"; oId "CUFF.37448.6"; tss_id "TSS27076"; |

"CUFF.37448.6"; tss\_id "TSS27076";  
chr17 Cufflinks exon5118442 5118588 . + . gene\_id "XLOC\_021445"; transcript\_id "TCONS\_00035945"; exon\_number "4"; oId  
"CUFF.37448.6"; tss\_id "TSS27076";  
chr17 Cufflinks exon5126612 5126779 . + . gene\_id "XLOC\_021445"; transcript\_id "TCONS\_00035945"; exon\_number "5"; oId  
"CUFF.37448.6"; tss\_id "TSS27076";  
chr17 Cufflinks exon5134772 5135073 . + . gene\_id "XLOC\_021445"; transcript\_id "TCONS\_00035945"; exon\_number "6"; oId  
"CUFF.37448.6"; tss\_id "TSS27076";  
chr17 Cufflinks exon5095319 5095458 . + . gene\_id "XLOC\_021445"; transcript\_id "TCONS\_00035946"; exon\_number "1"; oId  
"CUFF.37448.9"; tss\_id "TSS27076";  
chr17 Cufflinks exon5113045 5113190 . + . gene\_id "XLOC\_021445"; transcript\_id "TCONS\_00035946"; exon\_number "2"; oId  
"CUFF.37448.9"; tss\_id "TSS27076";  
chr17 Cufflinks exon5117345 5117504 . + . gene\_id "XLOC\_021445"; transcript\_id "TCONS\_00035946"; exon\_number "3"; oId  
"CUFF.37448.9"; tss\_id "TSS27076";  
chr17 Cufflinks exon5118442 5118588 . + . gene\_id "XLOC\_021445"; transcript\_id "TCONS\_00035946"; exon\_number "4"; oId  
"CUFF.37448.9"; tss\_id "TSS27076";  
chr17 Cufflinks exon5126612 5126779 . + . gene\_id "XLOC\_021445"; transcript\_id "TCONS\_00035946"; exon\_number "5"; oId  
"CUFF.37448.9"; tss\_id "TSS27076";  
chr17 Cufflinks exon5134694 5135073 . + . gene\_id "XLOC\_021445"; transcript\_id "TCONS\_00035946"; exon\_number "6"; oId  
"CUFF.37448.9"; tss\_id "TSS27076";  
chr17 Cufflinks exon5095319 5095458 . + . gene\_id "XLOC\_021445"; transcript\_id "TCONS\_00035948"; exon\_number "1"; oId  
"CUFF.37448.8"; tss\_id "TSS27076";  
chr17 Cufflinks exon5113045 5113190 . + . gene\_id "XLOC\_021445"; transcript\_id "TCONS\_00035948"; exon\_number "2"; oId  
"CUFF.37448.8"; tss\_id "TSS27076";  
chr17 Cufflinks exon5117345 5117504 . + . gene\_id "XLOC\_021445"; transcript\_id "TCONS\_00035948"; exon\_number "3"; oId  
"CUFF.37448.8"; tss\_id "TSS27076";  
chr17 Cufflinks exon5118442 5118588 . + . gene\_id "XLOC\_021445"; transcript\_id "TCONS\_00035948"; exon\_number "4"; oId  
"CUFF.37448.8"; tss\_id "TSS27076";  
chr17 Cufflinks exon5126612 5126779 . + . gene\_id "XLOC\_021445"; transcript\_id "TCONS\_00035948"; exon\_number "5"; oId  
"CUFF.37448.8"; tss\_id "TSS27076";  
chr17 Cufflinks exon5137119 5137237 . + . gene\_id "XLOC\_021445"; transcript\_id "TCONS\_00035948"; exon\_number "6"; oId  
"CUFF.37448.8"; tss\_id "TSS27076";  
chr17 Cufflinks exon5137888 5138106 . + . gene\_id "XLOC\_021445"; transcript\_id "TCONS\_00035948"; exon\_number "7"; oId  
"CUFF.37448.8"; tss\_id "TSS27076";  
chr17 Cufflinks exon5138243 5139280 . + . gene\_id "XLOC\_021445"; transcript\_id "TCONS\_00035948"; exon\_number "8"; oId  
"CUFF.37448.8"; tss\_id "TSS27076";  
chr17 Cufflinks exon5095319 5095458 . + . gene\_id "XLOC\_021445"; transcript\_id "TCONS\_00035947"; exon\_number "1"; oId  
"CUFF.37448.10"; tss\_id "TSS27076";  
chr17 Cufflinks exon5117345 5117504 . + . gene\_id "XLOC\_021445"; transcript\_id "TCONS\_00035947"; exon\_number "2"; oId  
"CUFF.37448.10"; tss\_id "TSS27076";  
chr17 Cufflinks exon5118442 5118588 . + . gene\_id "XLOC\_021445"; transcript\_id "TCONS\_00035947"; exon\_number "3"; oId  
"CUFF.37448.10"; tss\_id "TSS27076";  
chr17 Cufflinks exon5126612 5126779 . + . gene\_id "XLOC\_021445"; transcript\_id "TCONS\_00035947"; exon\_number "4"; oId  
"CUFF.37448.10"; tss\_id "TSS27076";



|       |                        |          |   |   |   |                                                                                                                 |
|-------|------------------------|----------|---|---|---|-----------------------------------------------------------------------------------------------------------------|
| chr17 | Cufflinks exon5138243  | 5139280  | . | + | . | gene_id "XLOC_021445"; transcript_id "TCONS_00035947"; exon_number "5"; oId "CUFF.37448.10"; tss_id "TSS27076"; |
| chr17 | Cufflinks exon8771086  | 8771322  | . | + | . | gene_id "XLOC_021535"; transcript_id "TCONS_00036086"; exon_number "1"; oId "CUFF.37754.1"; tss_id "TSS27190";  |
| chr17 | Cufflinks exon8771849  | 8772333  | . | + | . | gene_id "XLOC_021535"; transcript_id "TCONS_00036086"; exon_number "2"; oId "CUFF.37754.1"; tss_id "TSS27190";  |
| chr17 | Cufflinks exon14112905 | 14113282 | . | + | . | gene_id "XLOC_021551"; transcript_id "TCONS_00036116"; exon_number "1"; oId "CUFF.37893.1"; tss_id "TSS27209";  |
| chr17 | Cufflinks exon14114605 | 14114825 | . | + | . | gene_id "XLOC_021551"; transcript_id "TCONS_00036116"; exon_number "2"; oId "CUFF.37893.1"; tss_id "TSS27209";  |
| chr17 | Cufflinks exon14119127 | 14119255 | . | + | . | gene_id "XLOC_021551"; transcript_id "TCONS_00036116"; exon_number "3"; oId "CUFF.37893.1"; tss_id "TSS27209";  |
| chr17 | Cufflinks exon14120002 | 14121397 | . | + | . | gene_id "XLOC_021551"; transcript_id "TCONS_00036116"; exon_number "4"; oId "CUFF.37893.1"; tss_id "TSS27209";  |
| chr17 | Cufflinks exon14114720 | 14114825 | . | + | . | gene_id "XLOC_021551"; transcript_id "TCONS_00036118"; exon_number "1"; oId "CUFF.37893.3"; tss_id "TSS27210";  |
| chr17 | Cufflinks exon14119127 | 14119254 | . | + | . | gene_id "XLOC_021551"; transcript_id "TCONS_00036118"; exon_number "2"; oId "CUFF.37893.3"; tss_id "TSS27210";  |
| chr17 | Cufflinks exon14120002 | 14121397 | . | + | . | gene_id "XLOC_021551"; transcript_id "TCONS_00036118"; exon_number "3"; oId "CUFF.37893.3"; tss_id "TSS27210";  |
| chr17 | Cufflinks exon14114720 | 14114825 | . | + | . | gene_id "XLOC_021551"; transcript_id "TCONS_00036117"; exon_number "1"; oId "CUFF.37893.2"; tss_id "TSS27210";  |
| chr17 | Cufflinks exon14119127 | 14121397 | . | + | . | gene_id "XLOC_021551"; transcript_id "TCONS_00036117"; exon_number "2"; oId "CUFF.37893.2"; tss_id "TSS27210";  |
| chr17 | Cufflinks exon14116092 | 14117499 | . | + | . | gene_id "XLOC_021551"; transcript_id "TCONS_00036120"; exon_number "1"; oId "CUFF.37893.5"; tss_id "TSS27212";  |
| chr17 | Cufflinks exon14119129 | 14119254 | . | + | . | gene_id "XLOC_021551"; transcript_id "TCONS_00036120"; exon_number "2"; oId "CUFF.37893.5"; tss_id "TSS27212";  |
| chr17 | Cufflinks exon14120002 | 14121397 | . | + | . | gene_id "XLOC_021551"; transcript_id "TCONS_00036120"; exon_number "3"; oId "CUFF.37893.5"; tss_id "TSS27212";  |
| chr17 | Cufflinks exon14117435 | 14117497 | . | + | . | gene_id "XLOC_021551"; transcript_id "TCONS_00036121"; exon_number "1"; oId "CUFF.37893.6"; tss_id "TSS27213";  |
| chr17 | Cufflinks exon14119204 | 14119254 | . | + | . | gene_id "XLOC_021551"; transcript_id "TCONS_00036121"; exon_number "2"; oId "CUFF.37893.6"; tss_id "TSS27213";  |
| chr17 | Cufflinks exon14120002 | 14121397 | . | + | . | gene_id "XLOC_021551"; transcript_id "TCONS_00036121"; exon_number "3"; oId "CUFF.37893.6"; tss_id "TSS27213";  |
| chr17 | Cufflinks exon14117468 | 14117497 | . | + | . | gene_id "XLOC_021551"; transcript_id "TCONS_00036122"; exon_number "1"; oId "CUFF.37893.7"; tss_id "TSS27213";  |
| chr17 | Cufflinks exon14119127 | 14121397 | . | + | . | gene_id "XLOC_021551"; transcript_id "TCONS_00036122"; exon_number "2"; oId "CUFF.37893.7"; tss_id "TSS27213";  |
| chr17 | Cufflinks exon20319645 | 20320004 | . | + | . | gene_id "XLOC_021655"; transcript_id "TCONS_00036301"; exon_number "1"; oId "CUFF.38261.4"; tss_id "TSS27340";  |
| chr17 | Cufflinks exon20327905 | 20328091 | . | + | . | gene_id "XLOC_021655"; transcript_id "TCONS_00036301"; exon_number "1"; oId "CUFF.38261.4"; tss_id "TSS27340";  |

|                                             |   |   |   |                                                                    |  |
|---------------------------------------------|---|---|---|--------------------------------------------------------------------|--|
| "2"; oId "CUFF.38261.4"; tss_id "TSS27340"; |   |   |   |                                                                    |  |
| chr17 Cufflinks exon20323200 20323243       | . | + | . | gene_id "XLOC_021655"; transcript_id "TCONS_00036303"; exon_number |  |
| "1"; oId "CUFF.38261.5"; tss_id "TSS27341"; |   |   |   |                                                                    |  |
| chr17 Cufflinks exon20327905 20328096       | . | + | . | gene_id "XLOC_021655"; transcript_id "TCONS_00036303"; exon_number |  |
| "2"; oId "CUFF.38261.5"; tss_id "TSS27341"; |   |   |   |                                                                    |  |
| chr17 Cufflinks exon20330104 20330392       | . | + | . | gene_id "XLOC_021655"; transcript_id "TCONS_00036303"; exon_number |  |
| "3"; oId "CUFF.38261.5"; tss_id "TSS27341"; |   |   |   |                                                                    |  |
| chr17 Cufflinks exon26531774 26532150       | . | + | . | gene_id "XLOC_021698"; transcript_id "TCONS_00036374"; exon_number |  |
| "1"; oId "CUFF.38373.1"; tss_id "TSS27398"; |   |   |   |                                                                    |  |
| chr17 Cufflinks exon26548916 26549102       | . | + | . | gene_id "XLOC_021698"; transcript_id "TCONS_00036374"; exon_number |  |
| "2"; oId "CUFF.38373.1"; tss_id "TSS27398"; |   |   |   |                                                                    |  |
| chr17 Cufflinks exon26549714 26549839       | . | + | . | gene_id "XLOC_021698"; transcript_id "TCONS_00036374"; exon_number |  |
| "3"; oId "CUFF.38373.1"; tss_id "TSS27398"; |   |   |   |                                                                    |  |
| chr17 Cufflinks exon26550160 26550327       | . | + | . | gene_id "XLOC_021698"; transcript_id "TCONS_00036374"; exon_number |  |
| "4"; oId "CUFF.38373.1"; tss_id "TSS27398"; |   |   |   |                                                                    |  |
| chr17 Cufflinks exon27277661 27277712       | . | + | . | gene_id "XLOC_021717"; transcript_id "TCONS_00036407"; exon_number |  |
| "1"; oId "CUFF.38437.3"; tss_id "TSS27425"; |   |   |   |                                                                    |  |
| chr17 Cufflinks exon27280382 27281813       | . | + | . | gene_id "XLOC_021717"; transcript_id "TCONS_00036407"; exon_number |  |
| "2"; oId "CUFF.38437.3"; tss_id "TSS27425"; |   |   |   |                                                                    |  |
| chr17 Cufflinks exon30410148 30410341       | . | + | . | gene_id "XLOC_021783"; transcript_id "TCONS_00036514"; exon_number |  |
| "1"; oId "CUFF.38627.2"; tss_id "TSS27508"; |   |   |   |                                                                    |  |
| chr17 Cufflinks exon30412617 30412822       | . | + | . | gene_id "XLOC_021783"; transcript_id "TCONS_00036514"; exon_number |  |
| "2"; oId "CUFF.38627.2"; tss_id "TSS27508"; |   |   |   |                                                                    |  |
| chr17 Cufflinks exon30429218 30429602       | . | + | . | gene_id "XLOC_021785"; transcript_id "TCONS_00036516"; exon_number |  |
| "1"; oId "CUFF.38631.1"; tss_id "TSS27510"; |   |   |   |                                                                    |  |
| chr17 Cufflinks exon30432239 30433974       | . | + | . | gene_id "XLOC_021785"; transcript_id "TCONS_00036516"; exon_number |  |
| "2"; oId "CUFF.38631.1"; tss_id "TSS27510"; |   |   |   |                                                                    |  |
| chr17 Cufflinks exon30444078 30444117       | . | + | . | gene_id "XLOC_021787"; transcript_id "TCONS_00036518"; exon_number |  |
| "1"; oId "CUFF.38639.1"; tss_id "TSS27512"; |   |   |   |                                                                    |  |
| chr17 Cufflinks exon30454479 30455473       | . | + | . | gene_id "XLOC_021787"; transcript_id "TCONS_00036518"; exon_number |  |
| "2"; oId "CUFF.38639.1"; tss_id "TSS27512"; |   |   |   |                                                                    |  |
| chr17 Cufflinks exon30571050 30571072       | . | + | . | gene_id "XLOC_021792"; transcript_id "TCONS_00036526"; exon_number |  |
| "1"; oId "CUFF.38646.1"; tss_id "TSS27517"; |   |   |   |                                                                    |  |
| chr17 Cufflinks exon30580104 30580385       | . | + | . | gene_id "XLOC_021792"; transcript_id "TCONS_00036526"; exon_number |  |
| "2"; oId "CUFF.38646.1"; tss_id "TSS27517"; |   |   |   |                                                                    |  |
| chr17 Cufflinks exon33640417 33640725       | . | + | . | gene_id "XLOC_021824"; transcript_id "TCONS_00036570"; exon_number |  |
| "1"; oId "CUFF.38732.2"; tss_id "TSS27551"; |   |   |   |                                                                    |  |
| chr17 Cufflinks exon33650167 33650287       | . | + | . | gene_id "XLOC_021824"; transcript_id "TCONS_00036570"; exon_number |  |
| "2"; oId "CUFF.38732.2"; tss_id "TSS27551"; |   |   |   |                                                                    |  |
| chr17 Cufflinks exon33651673 33651758       | . | + | . | gene_id "XLOC_021824"; transcript_id "TCONS_00036570"; exon_number |  |
| "3"; oId "CUFF.38732.2"; tss_id "TSS27551"; |   |   |   |                                                                    |  |
| chr17 Cufflinks exon33868383 33880510       | . | + | . | gene_id "XLOC_021825"; transcript_id "TCONS_00036571"; exon_number |  |
| "1"; oId "CUFF.38767.3"; tss_id "TSS27552"; |   |   |   |                                                                    |  |

|       |                        |          |   |   |   |                                                                                                                |
|-------|------------------------|----------|---|---|---|----------------------------------------------------------------------------------------------------------------|
| chr17 | Cufflinks exon33881617 | 33881983 | . | + | . | gene_id "XLOC_021825"; transcript_id "TCONS_00036571"; exon_number "2"; oId "CUFF.38767.3"; tss_id "TSS27552"; |
| chr17 | Cufflinks exon33895060 | 33895520 | . | + | . | gene_id "XLOC_021827"; transcript_id "TCONS_00036574"; exon_number "1"; oId "CUFF.38773.1"; tss_id "TSS27555"; |
| chr17 | Cufflinks exon33900896 | 33908259 | . | + | . | gene_id "XLOC_021827"; transcript_id "TCONS_00036574"; exon_number "2"; oId "CUFF.38773.1"; tss_id "TSS27555"; |
| chr17 | Cufflinks exon34989202 | 34989879 | . | + | . | gene_id "XLOC_021852"; transcript_id "TCONS_00036615"; exon_number "1"; oId "CUFF.38835.1"; tss_id "TSS27585"; |
| chr17 | Cufflinks exon34990196 | 34991120 | . | + | . | gene_id "XLOC_021852"; transcript_id "TCONS_00036615"; exon_number "2"; oId "CUFF.38835.1"; tss_id "TSS27585"; |
| chr17 | Cufflinks exon35078825 | 35079149 | . | + | . | gene_id "XLOC_021853"; transcript_id "TCONS_00036616"; exon_number "1"; oId "CUFF.38841.1"; tss_id "TSS27586"; |
| chr17 | Cufflinks exon35081659 | 35081691 | . | + | . | gene_id "XLOC_021853"; transcript_id "TCONS_00036616"; exon_number "2"; oId "CUFF.38841.1"; tss_id "TSS27586"; |
| chr17 | Cufflinks exon35089544 | 35089751 | . | + | . | gene_id "XLOC_021853"; transcript_id "TCONS_00036616"; exon_number "3"; oId "CUFF.38841.1"; tss_id "TSS27586"; |
| chr17 | Cufflinks exon35091367 | 35091470 | . | + | . | gene_id "XLOC_021853"; transcript_id "TCONS_00036616"; exon_number "4"; oId "CUFF.38841.1"; tss_id "TSS27586"; |
| chr17 | Cufflinks exon35099409 | 35100719 | . | + | . | gene_id "XLOC_021853"; transcript_id "TCONS_00036616"; exon_number "5"; oId "CUFF.38841.1"; tss_id "TSS27586"; |
| chr17 | Cufflinks exon35078825 | 35079149 | . | + | . | gene_id "XLOC_021853"; transcript_id "TCONS_00036617"; exon_number "1"; oId "CUFF.38841.2"; tss_id "TSS27586"; |
| chr17 | Cufflinks exon35081659 | 35081691 | . | + | . | gene_id "XLOC_021853"; transcript_id "TCONS_00036617"; exon_number "2"; oId "CUFF.38841.2"; tss_id "TSS27586"; |
| chr17 | Cufflinks exon35089544 | 35089751 | . | + | . | gene_id "XLOC_021853"; transcript_id "TCONS_00036617"; exon_number "3"; oId "CUFF.38841.2"; tss_id "TSS27586"; |
| chr17 | Cufflinks exon35091367 | 35091471 | . | + | . | gene_id "XLOC_021853"; transcript_id "TCONS_00036617"; exon_number "4"; oId "CUFF.38841.2"; tss_id "TSS27586"; |
| chr17 | Cufflinks exon35099409 | 35099461 | . | + | . | gene_id "XLOC_021853"; transcript_id "TCONS_00036617"; exon_number "5"; oId "CUFF.38841.2"; tss_id "TSS27586"; |
| chr17 | Cufflinks exon35105040 | 35105805 | . | + | . | gene_id "XLOC_021853"; transcript_id "TCONS_00036617"; exon_number "6"; oId "CUFF.38841.2"; tss_id "TSS27586"; |
| chr17 | Cufflinks exon35078898 | 35081693 | . | + | . | gene_id "XLOC_021853"; transcript_id "TCONS_00036620"; exon_number "1"; oId "CUFF.38841.6"; tss_id "TSS27586"; |
| chr17 | Cufflinks exon35082458 | 35083541 | . | + | . | gene_id "XLOC_021853"; transcript_id "TCONS_00036620"; exon_number "2"; oId "CUFF.38841.6"; tss_id "TSS27586"; |
| chr17 | Cufflinks exon35078898 | 35080964 | . | + | . | gene_id "XLOC_021853"; transcript_id "TCONS_00036619"; exon_number "1"; oId "CUFF.38841.5"; tss_id "TSS27586"; |
| chr17 | Cufflinks exon35081659 | 35081691 | . | + | . | gene_id "XLOC_021853"; transcript_id "TCONS_00036619"; exon_number "2"; oId "CUFF.38841.5"; tss_id "TSS27586"; |
| chr17 | Cufflinks exon35082820 | 35083541 | . | + | . | gene_id "XLOC_021853"; transcript_id "TCONS_00036619"; exon_number "3"; oId "CUFF.38841.5"; tss_id "TSS27586"; |
| chr17 | Cufflinks exon35078898 | 35080084 | . | + | . | gene_id "XLOC_021853"; transcript_id "TCONS_00036618"; exon_number                                             |

"1"; oId "CUFF.38841.3"; tss\_id "TSS27586";  
chr17 Cufflinks exon35081659 35081693 . + . gene\_id "XLOC\_021853"; transcript\_id "TCONS\_00036618"; exon\_number  
"2"; oId "CUFF.38841.3"; tss\_id "TSS27586";  
chr17 Cufflinks exon35082458 35083541 . + . gene\_id "XLOC\_021853"; transcript\_id "TCONS\_00036618"; exon\_number  
"3"; oId "CUFF.38841.3"; tss\_id "TSS27586";  
chr17 Cufflinks exon35078898 35080964 . + . gene\_id "XLOC\_021853"; transcript\_id "TCONS\_00036621"; exon\_number  
"1"; oId "CUFF.38841.4"; tss\_id "TSS27586";  
chr17 Cufflinks exon35081659 35081691 . + . gene\_id "XLOC\_021853"; transcript\_id "TCONS\_00036621"; exon\_number  
"2"; oId "CUFF.38841.4"; tss\_id "TSS27586";  
chr17 Cufflinks exon35089446 35089487 . + . gene\_id "XLOC\_021853"; transcript\_id "TCONS\_00036621"; exon\_number  
"3"; oId "CUFF.38841.4"; tss\_id "TSS27586";  
chr17 Cufflinks exon35089730 35089751 . + . gene\_id "XLOC\_021853"; transcript\_id "TCONS\_00036624"; exon\_number  
"1"; oId "CUFF.38841.8"; tss\_id "TSS27588";  
chr17 Cufflinks exon35091370 35091470 . + . gene\_id "XLOC\_021853"; transcript\_id "TCONS\_00036624"; exon\_number  
"2"; oId "CUFF.38841.8"; tss\_id "TSS27588";  
chr17 Cufflinks exon35099409 35099464 . + . gene\_id "XLOC\_021853"; transcript\_id "TCONS\_00036624"; exon\_number  
"3"; oId "CUFF.38841.8"; tss\_id "TSS27588";  
chr17 Cufflinks exon35105043 35105805 . + . gene\_id "XLOC\_021853"; transcript\_id "TCONS\_00036624"; exon\_number  
"4"; oId "CUFF.38841.8"; tss\_id "TSS27588";  
chr17 Cufflinks exon35089737 35089751 . + . gene\_id "XLOC\_021853"; transcript\_id "TCONS\_00036625"; exon\_number  
"1"; oId "CUFF.38841.9"; tss\_id "TSS27588";  
chr17 Cufflinks exon35091370 35091471 . + . gene\_id "XLOC\_021853"; transcript\_id "TCONS\_00036625"; exon\_number  
"2"; oId "CUFF.38841.9"; tss\_id "TSS27588";  
chr17 Cufflinks exon35099409 35100719 . + . gene\_id "XLOC\_021853"; transcript\_id "TCONS\_00036625"; exon\_number  
"3"; oId "CUFF.38841.9"; tss\_id "TSS27588";  
chr17 Cufflinks exon38673189 38673301 . + . gene\_id "XLOC\_021950"; transcript\_id "TCONS\_00036787"; exon\_number  
"1"; oId "CUFF.39078.1"; tss\_id "TSS27717";  
chr17 Cufflinks exon38676967 38679907 . + . gene\_id "XLOC\_021950"; transcript\_id "TCONS\_00036787"; exon\_number  
"2"; oId "CUFF.39078.1"; tss\_id "TSS27717";  
chr17 Cufflinks exon38682696 38683387 . + . gene\_id "XLOC\_021950"; transcript\_id "TCONS\_00036787"; exon\_number  
"3"; oId "CUFF.39078.1"; tss\_id "TSS27717";  
chr17 Cufflinks exon38673229 38673301 . + . gene\_id "XLOC\_021950"; transcript\_id "TCONS\_00036788"; exon\_number  
"1"; oId "CUFF.39078.2"; tss\_id "TSS27717";  
chr17 Cufflinks exon38676967 38677076 . + . gene\_id "XLOC\_021950"; transcript\_id "TCONS\_00036788"; exon\_number  
"2"; oId "CUFF.39078.2"; tss\_id "TSS27717";  
chr17 Cufflinks exon38677405 38679907 . + . gene\_id "XLOC\_021950"; transcript\_id "TCONS\_00036788"; exon\_number  
"3"; oId "CUFF.39078.2"; tss\_id "TSS27717";  
chr17 Cufflinks exon38682696 38683387 . + . gene\_id "XLOC\_021950"; transcript\_id "TCONS\_00036788"; exon\_number  
"4"; oId "CUFF.39078.2"; tss\_id "TSS27717";  
chr17 Cufflinks exon38708709 38711401 . + . gene\_id "XLOC\_021955"; transcript\_id "TCONS\_00036793"; exon\_number  
"1"; oId "CUFF.39092.1"; tss\_id "TSS27722";  
chr17 Cufflinks exon38711598 38711842 . + . gene\_id "XLOC\_021955"; transcript\_id "TCONS\_00036793"; exon\_number  
"2"; oId "CUFF.39092.1"; tss\_id "TSS27722";

|       |                        |          |   |   |   |                                                                                                                |
|-------|------------------------|----------|---|---|---|----------------------------------------------------------------------------------------------------------------|
| chr17 | Cufflinks exon38713687 | 38716253 | . | + | . | gene_id "XLOC_021955"; transcript_id "TCONS_00036793"; exon_number "3"; oId "CUFF.39092.1"; tss_id "TSS27722"; |
| chr17 | Cufflinks exon40224288 | 40224858 | . | + | . | gene_id "XLOC_021973"; transcript_id "TCONS_00036818"; exon_number "1"; oId "CUFF.39178.1"; tss_id "TSS27744"; |
| chr17 | Cufflinks exon40240443 | 40240548 | . | + | . | gene_id "XLOC_021973"; transcript_id "TCONS_00036818"; exon_number "2"; oId "CUFF.39178.1"; tss_id "TSS27744"; |
| chr17 | Cufflinks exon40241712 | 40241934 | . | + | . | gene_id "XLOC_021973"; transcript_id "TCONS_00036818"; exon_number "3"; oId "CUFF.39178.1"; tss_id "TSS27744"; |
| chr17 | Cufflinks exon40224429 | 40224858 | . | + | . | gene_id "XLOC_021973"; transcript_id "TCONS_00036819"; exon_number "1"; oId "CUFF.39178.2"; tss_id "TSS27745"; |
| chr17 | Cufflinks exon40225634 | 40226276 | . | + | . | gene_id "XLOC_021973"; transcript_id "TCONS_00036819"; exon_number "2"; oId "CUFF.39178.2"; tss_id "TSS27745"; |
| chr17 | Cufflinks exon40224429 | 40224858 | . | + | . | gene_id "XLOC_021973"; transcript_id "TCONS_00036820"; exon_number "1"; oId "CUFF.39178.3"; tss_id "TSS27745"; |
| chr17 | Cufflinks exon40240443 | 40240548 | . | + | . | gene_id "XLOC_021973"; transcript_id "TCONS_00036820"; exon_number "2"; oId "CUFF.39178.3"; tss_id "TSS27745"; |
| chr17 | Cufflinks exon40240889 | 40241312 | . | + | . | gene_id "XLOC_021973"; transcript_id "TCONS_00036820"; exon_number "3"; oId "CUFF.39178.3"; tss_id "TSS27745"; |
| chr17 | Cufflinks exon42015618 | 42015765 | . | + | . | gene_id "XLOC_022028"; transcript_id "TCONS_00036922"; exon_number "1"; oId "CUFF.39359.1"; tss_id "TSS27815"; |
| chr17 | Cufflinks exon42015929 | 42016331 | . | + | . | gene_id "XLOC_022028"; transcript_id "TCONS_00036922"; exon_number "2"; oId "CUFF.39359.1"; tss_id "TSS27815"; |
| chr17 | Cufflinks exon42402640 | 42403060 | . | + | . | gene_id "XLOC_022041"; transcript_id "TCONS_00036946"; exon_number "1"; oId "CUFF.39410.1"; tss_id "TSS27830"; |
| chr17 | Cufflinks exon42404310 | 42404840 | . | + | . | gene_id "XLOC_022041"; transcript_id "TCONS_00036946"; exon_number "2"; oId "CUFF.39410.1"; tss_id "TSS27830"; |
| chr17 | Cufflinks exon46718626 | 46720440 | . | + | . | gene_id "XLOC_022126"; transcript_id "TCONS_00037115"; exon_number "1"; oId "CUFF.39842.2"; tss_id "TSS27951"; |
| chr17 | Cufflinks exon46729751 | 46729795 | . | + | . | gene_id "XLOC_022126"; transcript_id "TCONS_00037115"; exon_number "2"; oId "CUFF.39842.2"; tss_id "TSS27951"; |
| chr17 | Cufflinks exon46730233 | 46730336 | . | + | . | gene_id "XLOC_022126"; transcript_id "TCONS_00037115"; exon_number "3"; oId "CUFF.39842.2"; tss_id "TSS27951"; |
| chr17 | Cufflinks exon46760621 | 46760779 | . | + | . | gene_id "XLOC_022126"; transcript_id "TCONS_00037115"; exon_number "4"; oId "CUFF.39842.2"; tss_id "TSS27951"; |
| chr17 | Cufflinks exon46777974 | 46778058 | . | + | . | gene_id "XLOC_022126"; transcript_id "TCONS_00037115"; exon_number "5"; oId "CUFF.39842.2"; tss_id "TSS27951"; |
| chr17 | Cufflinks exon46781363 | 46783045 | . | + | . | gene_id "XLOC_022126"; transcript_id "TCONS_00037115"; exon_number "6"; oId "CUFF.39842.2"; tss_id "TSS27951"; |
| chr17 | Cufflinks exon46783421 | 46784708 | . | + | . | gene_id "XLOC_022126"; transcript_id "TCONS_00037115"; exon_number "7"; oId "CUFF.39842.2"; tss_id "TSS27951"; |
| chr17 | Cufflinks exon46718626 | 46720440 | . | + | . | gene_id "XLOC_022126"; transcript_id "TCONS_00037114"; exon_number "1"; oId "CUFF.39842.1"; tss_id "TSS27951"; |
| chr17 | Cufflinks exon46729751 | 46729795 | . | + | . | gene_id "XLOC_022126"; transcript_id "TCONS_00037114"; exon_number "2"; oId "CUFF.39842.1"; tss_id "TSS27951"; |

|                                             |   |   |   |                                                                    |  |
|---------------------------------------------|---|---|---|--------------------------------------------------------------------|--|
| "2"; oId "CUFF.39842.1"; tss_id "TSS27951"; |   |   |   |                                                                    |  |
| chr17 Cufflinks exon46730233 46730336       | . | + | . | gene_id "XLOC_022126"; transcript_id "TCONS_00037114"; exon_number |  |
| "3"; oId "CUFF.39842.1"; tss_id "TSS27951"; |   |   |   |                                                                    |  |
| chr17 Cufflinks exon46760621 46760779       | . | + | . | gene_id "XLOC_022126"; transcript_id "TCONS_00037114"; exon_number |  |
| "4"; oId "CUFF.39842.1"; tss_id "TSS27951"; |   |   |   |                                                                    |  |
| chr17 Cufflinks exon46764859 46765314       | . | + | . | gene_id "XLOC_022126"; transcript_id "TCONS_00037114"; exon_number |  |
| "5"; oId "CUFF.39842.1"; tss_id "TSS27951"; |   |   |   |                                                                    |  |
| chr17 Cufflinks exon46777974 46778058       | . | + | . | gene_id "XLOC_022126"; transcript_id "TCONS_00037114"; exon_number |  |
| "6"; oId "CUFF.39842.1"; tss_id "TSS27951"; |   |   |   |                                                                    |  |
| chr17 Cufflinks exon46781363 46783045       | . | + | . | gene_id "XLOC_022126"; transcript_id "TCONS_00037114"; exon_number |  |
| "7"; oId "CUFF.39842.1"; tss_id "TSS27951"; |   |   |   |                                                                    |  |
| chr17 Cufflinks exon46783421 46784708       | . | + | . | gene_id "XLOC_022126"; transcript_id "TCONS_00037114"; exon_number |  |
| "8"; oId "CUFF.39842.1"; tss_id "TSS27951"; |   |   |   |                                                                    |  |
| chr17 Cufflinks exon46756205 46756318       | . | + | . | gene_id "XLOC_022126"; transcript_id "TCONS_00037116"; exon_number |  |
| "1"; oId "CUFF.39842.3"; tss_id "TSS27952"; |   |   |   |                                                                    |  |
| chr17 Cufflinks exon46777974 46778058       | . | + | . | gene_id "XLOC_022126"; transcript_id "TCONS_00037116"; exon_number |  |
| "2"; oId "CUFF.39842.3"; tss_id "TSS27952"; |   |   |   |                                                                    |  |
| chr17 Cufflinks exon46781363 46783045       | . | + | . | gene_id "XLOC_022126"; transcript_id "TCONS_00037116"; exon_number |  |
| "3"; oId "CUFF.39842.3"; tss_id "TSS27952"; |   |   |   |                                                                    |  |
| chr17 Cufflinks exon46783421 46784708       | . | + | . | gene_id "XLOC_022126"; transcript_id "TCONS_00037116"; exon_number |  |
| "4"; oId "CUFF.39842.3"; tss_id "TSS27952"; |   |   |   |                                                                    |  |
| chr17 Cufflinks exon48944040 48944578       | . | + | . | gene_id "XLOC_022180"; transcript_id "TCONS_00037203"; exon_number |  |
| "1"; oId "CUFF.40011.1"; tss_id "TSS28014"; |   |   |   |                                                                    |  |
| chr17 Cufflinks exon48944857 48945732       | . | + | . | gene_id "XLOC_022180"; transcript_id "TCONS_00037203"; exon_number |  |
| "2"; oId "CUFF.40011.1"; tss_id "TSS28014"; |   |   |   |                                                                    |  |
| chr17 Cufflinks exon54793535 54793656       | . | + | . | gene_id "XLOC_022217"; transcript_id "TCONS_00037250"; exon_number |  |
| "1"; oId "CUFF.40122.1"; tss_id "TSS28055"; |   |   |   |                                                                    |  |
| chr17 Cufflinks exon54802012 54802432       | . | + | . | gene_id "XLOC_022217"; transcript_id "TCONS_00037250"; exon_number |  |
| "2"; oId "CUFF.40122.1"; tss_id "TSS28055"; |   |   |   |                                                                    |  |
| chr17 Cufflinks exon54802620 54803557       | . | + | . | gene_id "XLOC_022218"; transcript_id "TCONS_00037251"; exon_number |  |
| "1"; oId "CUFF.40122.3"; tss_id "TSS28056"; |   |   |   |                                                                    |  |
| chr17 Cufflinks exon54806520 54806639       | . | + | . | gene_id "XLOC_022218"; transcript_id "TCONS_00037251"; exon_number |  |
| "2"; oId "CUFF.40122.3"; tss_id "TSS28056"; |   |   |   |                                                                    |  |
| chr17 Cufflinks exon54813229 54814178       | . | + | . | gene_id "XLOC_022218"; transcript_id "TCONS_00037251"; exon_number |  |
| "3"; oId "CUFF.40122.3"; tss_id "TSS28056"; |   |   |   |                                                                    |  |
| chr17 Cufflinks exon56297217 56297420       | . | + | . | gene_id "XLOC_022240"; transcript_id "TCONS_00037278"; exon_number |  |
| "1"; oId "CUFF.40222.1"; tss_id "TSS28079"; |   |   |   |                                                                    |  |
| chr17 Cufflinks exon56310021 56310606       | . | + | . | gene_id "XLOC_022240"; transcript_id "TCONS_00037278"; exon_number |  |
| "2"; oId "CUFF.40222.1"; tss_id "TSS28079"; |   |   |   |                                                                    |  |
| chr17 Cufflinks exon56413169 56414671       | . | + | . | gene_id "XLOC_022242"; transcript_id "TCONS_00037283"; exon_number |  |
| "1"; oId "CUFF.40239.1"; tss_id "TSS28082"; |   |   |   |                                                                    |  |
| chr17 Cufflinks exon56414809 56429275       | . | + | . | gene_id "XLOC_022242"; transcript_id "TCONS_00037283"; exon_number |  |
| "2"; oId "CUFF.40239.1"; tss_id "TSS28082"; |   |   |   |                                                                    |  |

|       |                        |          |   |   |   |                                                                                                                |
|-------|------------------------|----------|---|---|---|----------------------------------------------------------------------------------------------------------------|
| chr17 | Cufflinks exon56429360 | 56432896 | . | + | . | gene_id "XLOC_022242"; transcript_id "TCONS_00037283"; exon_number "3"; oId "CUFF.40239.1"; tss_id "TSS28082"; |
| chr17 | Cufflinks exon56414563 | 56415040 | . | + | . | gene_id "XLOC_022242"; transcript_id "TCONS_00037285"; exon_number "1"; oId "CUFF.40239.3"; tss_id "TSS28083"; |
| chr17 | Cufflinks exon56429105 | 56429275 | . | + | . | gene_id "XLOC_022242"; transcript_id "TCONS_00037285"; exon_number "2"; oId "CUFF.40239.3"; tss_id "TSS28083"; |
| chr17 | Cufflinks exon56429360 | 56432896 | . | + | . | gene_id "XLOC_022242"; transcript_id "TCONS_00037285"; exon_number "3"; oId "CUFF.40239.3"; tss_id "TSS28083"; |
| chr17 | Cufflinks exon56414563 | 56414671 | . | + | . | gene_id "XLOC_022242"; transcript_id "TCONS_00037284"; exon_number "1"; oId "CUFF.40239.2"; tss_id "TSS28083"; |
| chr17 | Cufflinks exon56414809 | 56415040 | . | + | . | gene_id "XLOC_022242"; transcript_id "TCONS_00037284"; exon_number "2"; oId "CUFF.40239.2"; tss_id "TSS28083"; |
| chr17 | Cufflinks exon56429096 | 56429275 | . | + | . | gene_id "XLOC_022242"; transcript_id "TCONS_00037284"; exon_number "3"; oId "CUFF.40239.2"; tss_id "TSS28083"; |
| chr17 | Cufflinks exon56429360 | 56432896 | . | + | . | gene_id "XLOC_022242"; transcript_id "TCONS_00037284"; exon_number "4"; oId "CUFF.40239.2"; tss_id "TSS28083"; |
| chr17 | Cufflinks exon57184700 | 57184952 | . | + | . | gene_id "XLOC_022248"; transcript_id "TCONS_00037292"; exon_number "1"; oId "CUFF.40274.2"; tss_id "TSS28089"; |
| chr17 | Cufflinks exon57195285 | 57195814 | . | + | . | gene_id "XLOC_022248"; transcript_id "TCONS_00037292"; exon_number "2"; oId "CUFF.40274.2"; tss_id "TSS28089"; |
| chr17 | Cufflinks exon60698517 | 60699027 | . | + | . | gene_id "XLOC_022279"; transcript_id "TCONS_00037360"; exon_number "1"; oId "CUFF.40414.2"; tss_id "TSS28132"; |
| chr17 | Cufflinks exon60699733 | 60700498 | . | + | . | gene_id "XLOC_022279"; transcript_id "TCONS_00037360"; exon_number "2"; oId "CUFF.40414.2"; tss_id "TSS28132"; |
| chr17 | Cufflinks exon60701936 | 60703853 | . | + | . | gene_id "XLOC_022279"; transcript_id "TCONS_00037360"; exon_number "3"; oId "CUFF.40414.2"; tss_id "TSS28132"; |
| chr17 | Cufflinks exon60699069 | 60700498 | . | + | . | gene_id "XLOC_022279"; transcript_id "TCONS_00037361"; exon_number "1"; oId "CUFF.40414.4"; tss_id "TSS28133"; |
| chr17 | Cufflinks exon60701936 | 60703853 | . | + | . | gene_id "XLOC_022279"; transcript_id "TCONS_00037361"; exon_number "2"; oId "CUFF.40414.4"; tss_id "TSS28133"; |
| chr17 | Cufflinks exon62222719 | 62222782 | . | + | . | gene_id "XLOC_022300"; transcript_id "TCONS_00037399"; exon_number "1"; oId "CUFF.40492.1"; tss_id "TSS28162"; |
| chr17 | Cufflinks exon62223000 | 62231790 | . | + | . | gene_id "XLOC_022300"; transcript_id "TCONS_00037399"; exon_number "2"; oId "CUFF.40492.1"; tss_id "TSS28162"; |
| chr17 | Cufflinks exon63096921 | 63097160 | . | + | . | gene_id "XLOC_022319"; transcript_id "TCONS_00037423"; exon_number "1"; oId "CUFF.40575.3"; tss_id "TSS28182"; |
| chr17 | Cufflinks exon63097325 | 63097414 | . | + | . | gene_id "XLOC_022319"; transcript_id "TCONS_00037423"; exon_number "2"; oId "CUFF.40575.3"; tss_id "TSS28182"; |
| chr17 | Cufflinks exon63098607 | 63098636 | . | + | . | gene_id "XLOC_022319"; transcript_id "TCONS_00037423"; exon_number "3"; oId "CUFF.40575.3"; tss_id "TSS28182"; |
| chr17 | Cufflinks exon66176826 | 66177335 | . | + | . | gene_id "XLOC_022360"; transcript_id "TCONS_00037488"; exon_number "1"; oId "CUFF.40672.4"; tss_id "TSS28227"; |
| chr17 | Cufflinks exon66177692 | 66177813 | . | + | . | gene_id "XLOC_022360"; transcript_id "TCONS_00037488"; exon_number "2"; oId "CUFF.40672.4"; tss_id "TSS28227"; |

"2"; oId "CUFF.40672.4"; tss\_id "TSS28227";  
chr17 Cufflinks exon66191455 66192648 . + . gene\_id "XLOC\_022360"; transcript\_id "TCONS\_00037488"; exon\_number  
"3"; oId "CUFF.40672.4"; tss\_id "TSS28227";  
chr17 Cufflinks exon66192706 66193354 . + . gene\_id "XLOC\_022360"; transcript\_id "TCONS\_00037496"; exon\_number  
"1"; oId "CUFF.40672.14"; tss\_id "TSS28230";  
chr17 Cufflinks exon66193601 66194635 . + . gene\_id "XLOC\_022360"; transcript\_id "TCONS\_00037496"; exon\_number  
"2"; oId "CUFF.40672.14"; tss\_id "TSS28230";  
chr17 Cufflinks exon67997874 67997920 . + . gene\_id "XLOC\_022391"; transcript\_id "TCONS\_00037538"; exon\_number  
"1"; oId "CUFF.40755.2"; tss\_id "TSS28268";  
chr17 Cufflinks exon68016540 68016664 . + . gene\_id "XLOC\_022391"; transcript\_id "TCONS\_00037538"; exon\_number  
"2"; oId "CUFF.40755.2"; tss\_id "TSS28268";  
chr17 Cufflinks exon68021080 68021175 . + . gene\_id "XLOC\_022391"; transcript\_id "TCONS\_00037538"; exon\_number  
"3"; oId "CUFF.40755.2"; tss\_id "TSS28268";  
chr17 Cufflinks exon68031048 68031074 . + . gene\_id "XLOC\_022391"; transcript\_id "TCONS\_00037538"; exon\_number  
"4"; oId "CUFF.40755.2"; tss\_id "TSS28268";  
chr17 Cufflinks exon67997892 67997920 . + . gene\_id "XLOC\_022391"; transcript\_id "TCONS\_00037539"; exon\_number  
"1"; oId "CUFF.40755.3"; tss\_id "TSS28268";  
chr17 Cufflinks exon68016540 68016664 . + . gene\_id "XLOC\_022391"; transcript\_id "TCONS\_00037539"; exon\_number  
"2"; oId "CUFF.40755.3"; tss\_id "TSS28268";  
chr17 Cufflinks exon68021080 68021175 . + . gene\_id "XLOC\_022391"; transcript\_id "TCONS\_00037539"; exon\_number  
"3"; oId "CUFF.40755.3"; tss\_id "TSS28268";  
chr17 Cufflinks exon68032294 68032406 . + . gene\_id "XLOC\_022391"; transcript\_id "TCONS\_00037539"; exon\_number  
"4"; oId "CUFF.40755.3"; tss\_id "TSS28268";  
chr17 Cufflinks exon68035569 68035849 . + . gene\_id "XLOC\_022391"; transcript\_id "TCONS\_00037539"; exon\_number  
"5"; oId "CUFF.40755.3"; tss\_id "TSS28268";  
chr17 Cufflinks exon68031159 68031225 . + . gene\_id "XLOC\_022391"; transcript\_id "TCONS\_00037540"; exon\_number  
"1"; oId "CUFF.40755.4"; tss\_id "TSS28269";  
chr17 Cufflinks exon68032294 68032406 . + . gene\_id "XLOC\_022391"; transcript\_id "TCONS\_00037540"; exon\_number  
"2"; oId "CUFF.40755.4"; tss\_id "TSS28269";  
chr17 Cufflinks exon68035569 68035849 . + . gene\_id "XLOC\_022391"; transcript\_id "TCONS\_00037540"; exon\_number  
"3"; oId "CUFF.40755.4"; tss\_id "TSS28269";  
chr17 Cufflinks exon69008014 69008232 . + . gene\_id "XLOC\_022395"; transcript\_id "TCONS\_00037546"; exon\_number  
"1"; oId "CUFF.40760.2"; tss\_id "TSS28274";  
chr17 Cufflinks exon69011303 69011383 . + . gene\_id "XLOC\_022395"; transcript\_id "TCONS\_00037546"; exon\_number  
"2"; oId "CUFF.40760.2"; tss\_id "TSS28274";  
chr17 Cufflinks exon69011733 69012033 . + . gene\_id "XLOC\_022395"; transcript\_id "TCONS\_00037546"; exon\_number  
"3"; oId "CUFF.40760.2"; tss\_id "TSS28274";  
chr17 Cufflinks exon69008014 69008232 . + . gene\_id "XLOC\_022395"; transcript\_id "TCONS\_00037547"; exon\_number  
"1"; oId "CUFF.40760.3"; tss\_id "TSS28274";  
chr17 Cufflinks exon69009253 69009346 . + . gene\_id "XLOC\_022395"; transcript\_id "TCONS\_00037547"; exon\_number  
"2"; oId "CUFF.40760.3"; tss\_id "TSS28274";  
chr17 Cufflinks exon69011303 69011383 . + . gene\_id "XLOC\_022395"; transcript\_id "TCONS\_00037547"; exon\_number  
"3"; oId "CUFF.40760.3"; tss\_id "TSS28274";



|       |                |          |                                             |   |   |   |                                                                    |
|-------|----------------|----------|---------------------------------------------|---|---|---|--------------------------------------------------------------------|
| chr17 | Cufflinks exon | 69012517 | 69012545                                    | . | + | . | gene_id "XLOC_022395"; transcript_id "TCONS_00037547"; exon_number |
|       |                |          | "4"; oId "CUFF.40760.3"; tss_id "TSS28274"; |   |   |   |                                                                    |
| chr17 | Cufflinks exon | 70992314 | 70992327                                    | . | + | . | gene_id "XLOC_022398"; transcript_id "TCONS_00037551"; exon_number |
|       |                |          | "1"; oId "CUFF.40772.1"; tss_id "TSS28278"; |   |   |   |                                                                    |
| chr17 | Cufflinks exon | 71242890 | 71243214                                    | . | + | . | gene_id "XLOC_022398"; transcript_id "TCONS_00037551"; exon_number |
|       |                |          | "2"; oId "CUFF.40772.1"; tss_id "TSS28278"; |   |   |   |                                                                    |
| chr17 | Cufflinks exon | 74553846 | 74553939                                    | . | + | . | gene_id "XLOC_022473"; transcript_id "TCONS_00037679"; exon_number |
|       |                |          | "1"; oId "CUFF.41012.2"; tss_id "TSS28375"; |   |   |   |                                                                    |
| chr17 | Cufflinks exon | 74557370 | 74557480                                    | . | + | . | gene_id "XLOC_022473"; transcript_id "TCONS_00037679"; exon_number |
|       |                |          | "2"; oId "CUFF.41012.2"; tss_id "TSS28375"; |   |   |   |                                                                    |
| chr17 | Cufflinks exon | 74559201 | 74561430                                    | . | + | . | gene_id "XLOC_022473"; transcript_id "TCONS_00037679"; exon_number |
|       |                |          | "3"; oId "CUFF.41012.2"; tss_id "TSS28375"; |   |   |   |                                                                    |
| chr17 | Cufflinks exon | 74553846 | 74553939                                    | . | + | . | gene_id "XLOC_022473"; transcript_id "TCONS_00037678"; exon_number |
|       |                |          | "1"; oId "CUFF.41012.1"; tss_id "TSS28375"; |   |   |   |                                                                    |
| chr17 | Cufflinks exon | 74555027 | 74555125                                    | . | + | . | gene_id "XLOC_022473"; transcript_id "TCONS_00037678"; exon_number |
|       |                |          | "2"; oId "CUFF.41012.1"; tss_id "TSS28375"; |   |   |   |                                                                    |
| chr17 | Cufflinks exon | 74557370 | 74557480                                    | . | + | . | gene_id "XLOC_022473"; transcript_id "TCONS_00037678"; exon_number |
|       |                |          | "3"; oId "CUFF.41012.1"; tss_id "TSS28375"; |   |   |   |                                                                    |
| chr17 | Cufflinks exon | 74559201 | 74561430                                    | . | + | . | gene_id "XLOC_022473"; transcript_id "TCONS_00037678"; exon_number |
|       |                |          | "4"; oId "CUFF.41012.1"; tss_id "TSS28375"; |   |   |   |                                                                    |
| chr17 | Cufflinks exon | 75082470 | 75082579                                    | . | + | . | gene_id "XLOC_022482"; transcript_id "TCONS_00037696"; exon_number |
|       |                |          | "1"; oId "CUFF.41051.1"; tss_id "TSS28385"; |   |   |   |                                                                    |
| chr17 | Cufflinks exon | 75082670 | 75082942                                    | . | + | . | gene_id "XLOC_022482"; transcript_id "TCONS_00037696"; exon_number |
|       |                |          | "2"; oId "CUFF.41051.1"; tss_id "TSS28385"; |   |   |   |                                                                    |
| chr17 | Cufflinks exon | 75513052 | 75513407                                    | . | + | . | gene_id "XLOC_022497"; transcript_id "TCONS_00037721"; exon_number |
|       |                |          | "1"; oId "CUFF.41083.1"; tss_id "TSS28409"; |   |   |   |                                                                    |
| chr17 | Cufflinks exon | 75523083 | 75523495                                    | . | + | . | gene_id "XLOC_022497"; transcript_id "TCONS_00037721"; exon_number |
|       |                |          | "2"; oId "CUFF.41083.1"; tss_id "TSS28409"; |   |   |   |                                                                    |
| chr17 | Cufflinks exon | 75662339 | 75662422                                    | . | + | . | gene_id "XLOC_022507"; transcript_id "TCONS_00037731"; exon_number |
|       |                |          | "1"; oId "CUFF.41101.2"; tss_id "TSS28419"; |   |   |   |                                                                    |
| chr17 | Cufflinks exon | 75663036 | 75664394                                    | . | + | . | gene_id "XLOC_022507"; transcript_id "TCONS_00037731"; exon_number |
|       |                |          | "2"; oId "CUFF.41101.2"; tss_id "TSS28419"; |   |   |   |                                                                    |
| chr17 | Cufflinks exon | 75663036 | 75663270                                    | . | + | . | gene_id "XLOC_022507"; transcript_id "TCONS_00037732"; exon_number |
|       |                |          | "1"; oId "CUFF.41101.4"; tss_id "TSS28420"; |   |   |   |                                                                    |
| chr17 | Cufflinks exon | 75675690 | 75676740                                    | . | + | . | gene_id "XLOC_022507"; transcript_id "TCONS_00037732"; exon_number |
|       |                |          | "2"; oId "CUFF.41101.4"; tss_id "TSS28420"; |   |   |   |                                                                    |
| chr17 | Cufflinks exon | 75842854 | 75844497                                    | . | + | . | gene_id "XLOC_022512"; transcript_id "TCONS_00037737"; exon_number |
|       |                |          | "1"; oId "CUFF.41111.1"; tss_id "TSS28425"; |   |   |   |                                                                    |
| chr17 | Cufflinks exon | 75859368 | 75859593                                    | . | + | . | gene_id "XLOC_022512"; transcript_id "TCONS_00037737"; exon_number |
|       |                |          | "2"; oId "CUFF.41111.1"; tss_id "TSS28425"; |   |   |   |                                                                    |
| chr17 | Cufflinks exon | 75842942 | 75843336                                    | . | + | . | gene_id "XLOC_022512"; transcript_id "TCONS_00037738"; exon_number |
|       |                |          | "1"; oId "CUFF.41111.5"; tss_id "TSS28425"; |   |   |   |                                                                    |
| chr17 | Cufflinks exon | 75843811 | 75844497                                    | . | + | . | gene_id "XLOC_022512"; transcript_id "TCONS_00037738"; exon_number |

"2"; oId "CUFF.41111.5"; tss\_id "TSS28425";  
chr17 Cufflinks exon75853309 75854988 . + . gene\_id "XLOC\_022512"; transcript\_id "TCONS\_00037738"; exon\_number  
"3"; oId "CUFF.41111.5"; tss\_id "TSS28425";  
chr17 Cufflinks exon75843073 75843336 . + . gene\_id "XLOC\_022512"; transcript\_id "TCONS\_00037739"; exon\_number  
"1"; oId "CUFF.41111.6"; tss\_id "TSS28426";  
chr17 Cufflinks exon75843811 75844497 . + . gene\_id "XLOC\_022512"; transcript\_id "TCONS\_00037739"; exon\_number  
"2"; oId "CUFF.41111.6"; tss\_id "TSS28426";  
chr17 Cufflinks exon75859368 75859593 . + . gene\_id "XLOC\_022512"; transcript\_id "TCONS\_00037739"; exon\_number  
"3"; oId "CUFF.41111.6"; tss\_id "TSS28426";  
chr17 Cufflinks exon76356389 76356854 . + . gene\_id "XLOC\_022544"; transcript\_id "TCONS\_00037778"; exon\_number  
"1"; oId "CUFF.41175.1"; tss\_id "TSS28460";  
chr17 Cufflinks exon76358754 76358832 . + . gene\_id "XLOC\_022544"; transcript\_id "TCONS\_00037778"; exon\_number  
"2"; oId "CUFF.41175.1"; tss\_id "TSS28460";  
chr17 Cufflinks exon76363274 76363347 . + . gene\_id "XLOC\_022544"; transcript\_id "TCONS\_00037778"; exon\_number  
"3"; oId "CUFF.41175.1"; tss\_id "TSS28460";  
chr17 Cufflinks exon76364809 76364974 . + . gene\_id "XLOC\_022544"; transcript\_id "TCONS\_00037778"; exon\_number  
"4"; oId "CUFF.41175.1"; tss\_id "TSS28460";  
chr17 Cufflinks exon76365386 76365442 . + . gene\_id "XLOC\_022544"; transcript\_id "TCONS\_00037778"; exon\_number  
"5"; oId "CUFF.41175.1"; tss\_id "TSS28460";  
chr17 Cufflinks exon76356529 76356854 . + . gene\_id "XLOC\_022544"; transcript\_id "TCONS\_00037779"; exon\_number  
"1"; oId "CUFF.41175.2"; tss\_id "TSS28461";  
chr17 Cufflinks exon76357847 76357902 . + . gene\_id "XLOC\_022544"; transcript\_id "TCONS\_00037779"; exon\_number  
"2"; oId "CUFF.41175.2"; tss\_id "TSS28461";  
chr17 Cufflinks exon76358754 76358832 . + . gene\_id "XLOC\_022544"; transcript\_id "TCONS\_00037779"; exon\_number  
"3"; oId "CUFF.41175.2"; tss\_id "TSS28461";  
chr17 Cufflinks exon76360578 76361012 . + . gene\_id "XLOC\_022544"; transcript\_id "TCONS\_00037779"; exon\_number  
"4"; oId "CUFF.41175.2"; tss\_id "TSS28461";  
chr17 Cufflinks exon76356529 76356854 . + . gene\_id "XLOC\_022544"; transcript\_id "TCONS\_00037780"; exon\_number  
"1"; oId "CUFF.41175.3"; tss\_id "TSS28461";  
chr17 Cufflinks exon76358754 76358832 . + . gene\_id "XLOC\_022544"; transcript\_id "TCONS\_00037780"; exon\_number  
"2"; oId "CUFF.41175.3"; tss\_id "TSS28461";  
chr17 Cufflinks exon76363274 76363347 . + . gene\_id "XLOC\_022544"; transcript\_id "TCONS\_00037780"; exon\_number  
"3"; oId "CUFF.41175.3"; tss\_id "TSS28461";  
chr17 Cufflinks exon76364809 76364974 . + . gene\_id "XLOC\_022544"; transcript\_id "TCONS\_00037780"; exon\_number  
"4"; oId "CUFF.41175.3"; tss\_id "TSS28461";  
chr17 Cufflinks exon76369856 76369990 . + . gene\_id "XLOC\_022544"; transcript\_id "TCONS\_00037780"; exon\_number  
"5"; oId "CUFF.41175.3"; tss\_id "TSS28461";  
chr17 Cufflinks exon76357083 76357141 . + . gene\_id "XLOC\_022544"; transcript\_id "TCONS\_00037781"; exon\_number  
"1"; oId "CUFF.41175.4"; tss\_id "TSS28462";  
chr17 Cufflinks exon76358754 76358832 . + . gene\_id "XLOC\_022544"; transcript\_id "TCONS\_00037781"; exon\_number  
"2"; oId "CUFF.41175.4"; tss\_id "TSS28462";  
chr17 Cufflinks exon76360578 76361012 . + . gene\_id "XLOC\_022544"; transcript\_id "TCONS\_00037781"; exon\_number  
"3"; oId "CUFF.41175.4"; tss\_id "TSS28462";

|       |                |          |          |   |   |   |                                                                                                                |
|-------|----------------|----------|----------|---|---|---|----------------------------------------------------------------------------------------------------------------|
| chr17 | Cufflinks exon | 76837112 | 76839829 | . | + | . | gene_id "XLOC_022546"; transcript_id "TCONS_00037791"; exon_number "1"; oId "CUFF.41205.1"; tss_id "TSS28465"; |
| chr17 | Cufflinks exon | 76841942 | 76842968 | . | + | . | gene_id "XLOC_022546"; transcript_id "TCONS_00037791"; exon_number "2"; oId "CUFF.41205.1"; tss_id "TSS28465"; |
| chr17 | Cufflinks exon | 76837129 | 76841481 | . | + | . | gene_id "XLOC_022546"; transcript_id "TCONS_00037793"; exon_number "1"; oId "CUFF.41205.3"; tss_id "TSS28465"; |
| chr17 | Cufflinks exon | 76841942 | 76842968 | . | + | . | gene_id "XLOC_022546"; transcript_id "TCONS_00037793"; exon_number "2"; oId "CUFF.41205.3"; tss_id "TSS28465"; |
| chr17 | Cufflinks exon | 76837178 | 76838873 | . | + | . | gene_id "XLOC_022546"; transcript_id "TCONS_00037794"; exon_number "1"; oId "CUFF.41205.4"; tss_id "TSS28465"; |
| chr17 | Cufflinks exon | 76841942 | 76842968 | . | + | . | gene_id "XLOC_022546"; transcript_id "TCONS_00037794"; exon_number "2"; oId "CUFF.41205.4"; tss_id "TSS28465"; |
| chr17 | Cufflinks exon | 77778136 | 77778358 | . | + | . | gene_id "XLOC_022556"; transcript_id "TCONS_00037814"; exon_number "1"; oId "CUFF.41250.1"; tss_id "TSS28480"; |
| chr17 | Cufflinks exon | 77778713 | 77779132 | . | + | . | gene_id "XLOC_022556"; transcript_id "TCONS_00037814"; exon_number "2"; oId "CUFF.41250.1"; tss_id "TSS28480"; |
| chr17 | Cufflinks exon | 77786862 | 77787070 | . | + | . | gene_id "XLOC_022558"; transcript_id "TCONS_00037816"; exon_number "1"; oId "CUFF.41252.2"; tss_id "TSS28482"; |
| chr17 | Cufflinks exon | 77788254 | 77788492 | . | + | . | gene_id "XLOC_022558"; transcript_id "TCONS_00037816"; exon_number "2"; oId "CUFF.41252.2"; tss_id "TSS28482"; |
| chr17 | Cufflinks exon | 77790744 | 77792463 | . | + | . | gene_id "XLOC_022558"; transcript_id "TCONS_00037816"; exon_number "3"; oId "CUFF.41252.2"; tss_id "TSS28482"; |
| chr17 | Cufflinks exon | 77793293 | 77793309 | . | + | . | gene_id "XLOC_022558"; transcript_id "TCONS_00037816"; exon_number "4"; oId "CUFF.41252.2"; tss_id "TSS28482"; |
| chr17 | Cufflinks exon | 77786862 | 77787070 | . | + | . | gene_id "XLOC_022558"; transcript_id "TCONS_00037817"; exon_number "1"; oId "CUFF.41252.1"; tss_id "TSS28482"; |
| chr17 | Cufflinks exon | 77788254 | 77788492 | . | + | . | gene_id "XLOC_022558"; transcript_id "TCONS_00037817"; exon_number "2"; oId "CUFF.41252.1"; tss_id "TSS28482"; |
| chr17 | Cufflinks exon | 77790744 | 77791837 | . | + | . | gene_id "XLOC_022558"; transcript_id "TCONS_00037817"; exon_number "3"; oId "CUFF.41252.1"; tss_id "TSS28482"; |
| chr17 | Cufflinks exon | 77793307 | 77793467 | . | + | . | gene_id "XLOC_022558"; transcript_id "TCONS_00037817"; exon_number "4"; oId "CUFF.41252.1"; tss_id "TSS28482"; |
| chr17 | Cufflinks exon | 77793618 | 77793872 | . | + | . | gene_id "XLOC_022558"; transcript_id "TCONS_00037817"; exon_number "5"; oId "CUFF.41252.1"; tss_id "TSS28482"; |
| chr17 | Cufflinks exon | 77796653 | 77797005 | . | + | . | gene_id "XLOC_022558"; transcript_id "TCONS_00037817"; exon_number "6"; oId "CUFF.41252.1"; tss_id "TSS28482"; |
| chr17 | Cufflinks exon | 77786906 | 77787070 | . | + | . | gene_id "XLOC_022558"; transcript_id "TCONS_00037818"; exon_number "1"; oId "CUFF.41252.3"; tss_id "TSS28482"; |
| chr17 | Cufflinks exon | 77788254 | 77788492 | . | + | . | gene_id "XLOC_022558"; transcript_id "TCONS_00037818"; exon_number "2"; oId "CUFF.41252.3"; tss_id "TSS28482"; |
| chr17 | Cufflinks exon | 77790744 | 77791837 | . | + | . | gene_id "XLOC_022558"; transcript_id "TCONS_00037818"; exon_number "3"; oId "CUFF.41252.3"; tss_id "TSS28482"; |
| chr17 | Cufflinks exon | 77793307 | 77793467 | . | + | . | gene_id "XLOC_022558"; transcript_id "TCONS_00037818"; exon_number "4"; oId "CUFF.41252.3"; tss_id "TSS28482"; |

|                                             |   |   |   |                                                                    |  |
|---------------------------------------------|---|---|---|--------------------------------------------------------------------|--|
| "4"; oId "CUFF.41252.3"; tss_id "TSS28482"; |   |   |   |                                                                    |  |
| chr17 Cufflinks exon77793618 77797337       | . | + | . | gene_id "XLOC_022558"; transcript_id "TCONS_00037818"; exon_number |  |
| "5"; oId "CUFF.41252.3"; tss_id "TSS28482"; |   |   |   |                                                                    |  |
| chr17 Cufflinks exon77797594 77797673       | . | + | . | gene_id "XLOC_022558"; transcript_id "TCONS_00037818"; exon_number |  |
| "6"; oId "CUFF.41252.3"; tss_id "TSS28482"; |   |   |   |                                                                    |  |
| chr17 Cufflinks exon77799883 77801523       | . | + | . | gene_id "XLOC_022558"; transcript_id "TCONS_00037818"; exon_number |  |
| "7"; oId "CUFF.41252.3"; tss_id "TSS28482"; |   |   |   |                                                                    |  |
| chr17 Cufflinks exon77786940 77787070       | . | + | . | gene_id "XLOC_022558"; transcript_id "TCONS_00037819"; exon_number |  |
| "1"; oId "CUFF.41252.4"; tss_id "TSS28482"; |   |   |   |                                                                    |  |
| chr17 Cufflinks exon77788254 77788492       | . | + | . | gene_id "XLOC_022558"; transcript_id "TCONS_00037819"; exon_number |  |
| "2"; oId "CUFF.41252.4"; tss_id "TSS28482"; |   |   |   |                                                                    |  |
| chr17 Cufflinks exon77790526 77793467       | . | + | . | gene_id "XLOC_022558"; transcript_id "TCONS_00037819"; exon_number |  |
| "3"; oId "CUFF.41252.4"; tss_id "TSS28482"; |   |   |   |                                                                    |  |
| chr17 Cufflinks exon77793570 77796893       | . | + | . | gene_id "XLOC_022558"; transcript_id "TCONS_00037819"; exon_number |  |
| "4"; oId "CUFF.41252.4"; tss_id "TSS28482"; |   |   |   |                                                                    |  |
| chr17 Cufflinks exon77797214 77797337       | . | + | . | gene_id "XLOC_022558"; transcript_id "TCONS_00037819"; exon_number |  |
| "5"; oId "CUFF.41252.4"; tss_id "TSS28482"; |   |   |   |                                                                    |  |
| chr17 Cufflinks exon77797594 77797673       | . | + | . | gene_id "XLOC_022558"; transcript_id "TCONS_00037819"; exon_number |  |
| "6"; oId "CUFF.41252.4"; tss_id "TSS28482"; |   |   |   |                                                                    |  |
| chr17 Cufflinks exon77799883 77801523       | . | + | . | gene_id "XLOC_022558"; transcript_id "TCONS_00037819"; exon_number |  |
| "7"; oId "CUFF.41252.4"; tss_id "TSS28482"; |   |   |   |                                                                    |  |
| chr17 Cufflinks exon77787025 77787070       | . | + | . | gene_id "XLOC_022558"; transcript_id "TCONS_00037821"; exon_number |  |
| "1"; oId "CUFF.41252.6"; tss_id "TSS28483"; |   |   |   |                                                                    |  |
| chr17 Cufflinks exon77788254 77793467       | . | + | . | gene_id "XLOC_022558"; transcript_id "TCONS_00037821"; exon_number |  |
| "2"; oId "CUFF.41252.6"; tss_id "TSS28483"; |   |   |   |                                                                    |  |
| chr17 Cufflinks exon77793618 77793872       | . | + | . | gene_id "XLOC_022558"; transcript_id "TCONS_00037821"; exon_number |  |
| "3"; oId "CUFF.41252.6"; tss_id "TSS28483"; |   |   |   |                                                                    |  |
| chr17 Cufflinks exon77797214 77797337       | . | + | . | gene_id "XLOC_022558"; transcript_id "TCONS_00037821"; exon_number |  |
| "4"; oId "CUFF.41252.6"; tss_id "TSS28483"; |   |   |   |                                                                    |  |
| chr17 Cufflinks exon77797594 77797673       | . | + | . | gene_id "XLOC_022558"; transcript_id "TCONS_00037821"; exon_number |  |
| "5"; oId "CUFF.41252.6"; tss_id "TSS28483"; |   |   |   |                                                                    |  |
| chr17 Cufflinks exon77799883 77801523       | . | + | . | gene_id "XLOC_022558"; transcript_id "TCONS_00037821"; exon_number |  |
| "6"; oId "CUFF.41252.6"; tss_id "TSS28483"; |   |   |   |                                                                    |  |
| chr17 Cufflinks exon77787025 77787070       | . | + | . | gene_id "XLOC_022558"; transcript_id "TCONS_00037820"; exon_number |  |
| "1"; oId "CUFF.41252.5"; tss_id "TSS28483"; |   |   |   |                                                                    |  |
| chr17 Cufflinks exon77788254 77790597       | . | + | . | gene_id "XLOC_022558"; transcript_id "TCONS_00037820"; exon_number |  |
| "2"; oId "CUFF.41252.5"; tss_id "TSS28483"; |   |   |   |                                                                    |  |
| chr17 Cufflinks exon77790744 77793467       | . | + | . | gene_id "XLOC_022558"; transcript_id "TCONS_00037820"; exon_number |  |
| "3"; oId "CUFF.41252.5"; tss_id "TSS28483"; |   |   |   |                                                                    |  |
| chr17 Cufflinks exon77799883 77801523       | . | + | . | gene_id "XLOC_022558"; transcript_id "TCONS_00037820"; exon_number |  |
| "4"; oId "CUFF.41252.5"; tss_id "TSS28483"; |   |   |   |                                                                    |  |
| chr17 Cufflinks exon77787026 77787070       | . | + | . | gene_id "XLOC_022558"; transcript_id "TCONS_00037822"; exon_number |  |
| "1"; oId "CUFF.41252.7"; tss_id "TSS28483"; |   |   |   |                                                                    |  |

|       |                |          |          |   |   |   |                                                                                                                 |
|-------|----------------|----------|----------|---|---|---|-----------------------------------------------------------------------------------------------------------------|
| chr17 | Cufflinks exon | 77788254 | 77788492 | . | + | . | gene_id "XLOC_022558"; transcript_id "TCONS_00037822"; exon_number "2"; oId "CUFF.41252.7"; tss_id "TSS28483";  |
| chr17 | Cufflinks exon | 77790744 | 77791837 | . | + | . | gene_id "XLOC_022558"; transcript_id "TCONS_00037822"; exon_number "3"; oId "CUFF.41252.7"; tss_id "TSS28483";  |
| chr17 | Cufflinks exon | 77793307 | 77793467 | . | + | . | gene_id "XLOC_022558"; transcript_id "TCONS_00037822"; exon_number "4"; oId "CUFF.41252.7"; tss_id "TSS28483";  |
| chr17 | Cufflinks exon | 77793570 | 77793652 | . | + | . | gene_id "XLOC_022558"; transcript_id "TCONS_00037822"; exon_number "5"; oId "CUFF.41252.7"; tss_id "TSS28483";  |
| chr17 | Cufflinks exon | 77788125 | 77793467 | . | + | . | gene_id "XLOC_022558"; transcript_id "TCONS_00037823"; exon_number "1"; oId "CUFF.41252.8"; tss_id "TSS28484";  |
| chr17 | Cufflinks exon | 77793618 | 77793872 | . | + | . | gene_id "XLOC_022558"; transcript_id "TCONS_00037823"; exon_number "2"; oId "CUFF.41252.8"; tss_id "TSS28484";  |
| chr17 | Cufflinks exon | 77796653 | 77797337 | . | + | . | gene_id "XLOC_022558"; transcript_id "TCONS_00037823"; exon_number "3"; oId "CUFF.41252.8"; tss_id "TSS28484";  |
| chr17 | Cufflinks exon | 77797594 | 77797673 | . | + | . | gene_id "XLOC_022558"; transcript_id "TCONS_00037823"; exon_number "4"; oId "CUFF.41252.8"; tss_id "TSS28484";  |
| chr17 | Cufflinks exon | 77799883 | 77801523 | . | + | . | gene_id "XLOC_022558"; transcript_id "TCONS_00037823"; exon_number "5"; oId "CUFF.41252.8"; tss_id "TSS28484";  |
| chr17 | Cufflinks exon | 77788242 | 77788492 | . | + | . | gene_id "XLOC_022558"; transcript_id "TCONS_00037824"; exon_number "1"; oId "CUFF.41252.9"; tss_id "TSS28485";  |
| chr17 | Cufflinks exon | 77790744 | 77791839 | . | + | . | gene_id "XLOC_022558"; transcript_id "TCONS_00037824"; exon_number "2"; oId "CUFF.41252.9"; tss_id "TSS28485";  |
| chr17 | Cufflinks exon | 77793307 | 77793467 | . | + | . | gene_id "XLOC_022558"; transcript_id "TCONS_00037824"; exon_number "3"; oId "CUFF.41252.9"; tss_id "TSS28485";  |
| chr17 | Cufflinks exon | 77793570 | 77793872 | . | + | . | gene_id "XLOC_022558"; transcript_id "TCONS_00037824"; exon_number "4"; oId "CUFF.41252.9"; tss_id "TSS28485";  |
| chr17 | Cufflinks exon | 77796653 | 77796841 | . | + | . | gene_id "XLOC_022558"; transcript_id "TCONS_00037824"; exon_number "5"; oId "CUFF.41252.9"; tss_id "TSS28485";  |
| chr17 | Cufflinks exon | 77797214 | 77797337 | . | + | . | gene_id "XLOC_022558"; transcript_id "TCONS_00037824"; exon_number "6"; oId "CUFF.41252.9"; tss_id "TSS28485";  |
| chr17 | Cufflinks exon | 77797594 | 77797673 | . | + | . | gene_id "XLOC_022558"; transcript_id "TCONS_00037824"; exon_number "7"; oId "CUFF.41252.9"; tss_id "TSS28485";  |
| chr17 | Cufflinks exon | 77799883 | 77801523 | . | + | . | gene_id "XLOC_022558"; transcript_id "TCONS_00037824"; exon_number "8"; oId "CUFF.41252.9"; tss_id "TSS28485";  |
| chr17 | Cufflinks exon | 77788480 | 77788492 | . | + | . | gene_id "XLOC_022558"; transcript_id "TCONS_00037825"; exon_number "1"; oId "CUFF.41252.10"; tss_id "TSS28486"; |
| chr17 | Cufflinks exon | 77790744 | 77791837 | . | + | . | gene_id "XLOC_022558"; transcript_id "TCONS_00037825"; exon_number "2"; oId "CUFF.41252.10"; tss_id "TSS28486"; |
| chr17 | Cufflinks exon | 77793307 | 77793467 | . | + | . | gene_id "XLOC_022558"; transcript_id "TCONS_00037825"; exon_number "3"; oId "CUFF.41252.10"; tss_id "TSS28486"; |
| chr17 | Cufflinks exon | 77793618 | 77793872 | . | + | . | gene_id "XLOC_022558"; transcript_id "TCONS_00037825"; exon_number "4"; oId "CUFF.41252.10"; tss_id "TSS28486"; |
| chr17 | Cufflinks exon | 77794867 | 77797005 | . | + | . | gene_id "XLOC_022558"; transcript_id "TCONS_00037825";                                                          |

exon\_number "5"; oId "CUFF.41252.10"; tss\_id "TSS28486";  
 chr17 Cufflinks exon 77788662 77789810 . + . gene\_id "XLOC\_022558"; transcript\_id "TCONS\_00037826";  
 exon\_number "1"; oId "CUFF.41252.11"; tss\_id "TSS28487";  
 chr17 Cufflinks exon 77790526 77791837 . + . gene\_id "XLOC\_022558"; transcript\_id "TCONS\_00037826";  
 exon\_number "2"; oId "CUFF.41252.11"; tss\_id "TSS28487";  
 chr17 Cufflinks exon 77793307 77793467 . + . gene\_id "XLOC\_022558"; transcript\_id "TCONS\_00037826";  
 exon\_number "3"; oId "CUFF.41252.11"; tss\_id "TSS28487";  
 chr17 Cufflinks exon 77796653 77797337 . + . gene\_id "XLOC\_022558"; transcript\_id "TCONS\_00037826";  
 exon\_number "4"; oId "CUFF.41252.11"; tss\_id "TSS28487";  
 chr17 Cufflinks exon 77797594 77797680 . + . gene\_id "XLOC\_022558"; transcript\_id "TCONS\_00037826";  
 exon\_number "5"; oId "CUFF.41252.11"; tss\_id "TSS28487";  
 chr17 Cufflinks exon 77799890 77801523 . + . gene\_id "XLOC\_022558"; transcript\_id "TCONS\_00037826";  
 exon\_number "6"; oId "CUFF.41252.11"; tss\_id "TSS28487";  
 chr17 Cufflinks exon 77788705 77790597 . + . gene\_id "XLOC\_022558"; transcript\_id "TCONS\_00037827";  
 exon\_number "1"; oId "CUFF.41252.12"; tss\_id "TSS28487";  
 chr17 Cufflinks exon 77790744 77791837 . + . gene\_id "XLOC\_022558"; transcript\_id "TCONS\_00037827";  
 exon\_number "2"; oId "CUFF.41252.12"; tss\_id "TSS28487";  
 chr17 Cufflinks exon 77793293 77793467 . + . gene\_id "XLOC\_022558"; transcript\_id "TCONS\_00037827";  
 exon\_number "3"; oId "CUFF.41252.12"; tss\_id "TSS28487";  
 chr17 Cufflinks exon 77793621 77793872 . + . gene\_id "XLOC\_022558"; transcript\_id "TCONS\_00037827";  
 exon\_number "4"; oId "CUFF.41252.12"; tss\_id "TSS28487";  
 chr17 Cufflinks exon 77797217 77797337 . + . gene\_id "XLOC\_022558"; transcript\_id "TCONS\_00037827"; exon\_number  
 "5"; oId "CUFF.41252.12"; tss\_id "TSS28487";  
 chr17 Cufflinks exon 77797594 77797673 . + . gene\_id "XLOC\_022558"; transcript\_id "TCONS\_00037827"; exon\_number  
 "6"; oId "CUFF.41252.12"; tss\_id "TSS28487";  
 chr17 Cufflinks exon 77799883 77801523 . + . gene\_id "XLOC\_022558"; transcript\_id "TCONS\_00037827"; exon\_number  
 "7"; oId "CUFF.41252.12"; tss\_id "TSS28487";  
 chr17 Cufflinks exon 77790012 77790083 . + . gene\_id "XLOC\_022558"; transcript\_id "TCONS\_00037828"; exon\_number  
 "1"; oId "CUFF.41252.14"; tss\_id "TSS28488";  
 chr17 Cufflinks exon 77790442 77793467 . + . gene\_id "XLOC\_022558"; transcript\_id "TCONS\_00037828"; exon\_number  
 "2"; oId "CUFF.41252.14"; tss\_id "TSS28488";  
 chr17 Cufflinks exon 77793618 77793872 . + . gene\_id "XLOC\_022558"; transcript\_id "TCONS\_00037828"; exon\_number  
 "3"; oId "CUFF.41252.14"; tss\_id "TSS28488";  
 chr17 Cufflinks exon 77796653 77797005 . + . gene\_id "XLOC\_022558"; transcript\_id "TCONS\_00037828"; exon\_number  
 "4"; oId "CUFF.41252.14"; tss\_id "TSS28488";  
 chr17 Cufflinks exon 77790012 77790083 . + . gene\_id "XLOC\_022558"; transcript\_id "TCONS\_00037829"; exon\_number  
 "1"; oId "CUFF.41252.13"; tss\_id "TSS28488";  
 chr17 Cufflinks exon 77790442 77790597 . + . gene\_id "XLOC\_022558"; transcript\_id "TCONS\_00037829"; exon\_number  
 "2"; oId "CUFF.41252.13"; tss\_id "TSS28488";  
 chr17 Cufflinks exon 77790744 77793467 . + . gene\_id "XLOC\_022558"; transcript\_id "TCONS\_00037829"; exon\_number  
 "3"; oId "CUFF.41252.13"; tss\_id "TSS28488";  
 chr17 Cufflinks exon 77793570 77797337 . + . gene\_id "XLOC\_022558"; transcript\_id "TCONS\_00037829"; exon\_number  
 "4"; oId "CUFF.41252.13"; tss\_id "TSS28488";

|       |                        |          |   |   |   |                                                                                                                 |
|-------|------------------------|----------|---|---|---|-----------------------------------------------------------------------------------------------------------------|
| chr17 | Cufflinks exon77797594 | 77797674 | . | + | . | gene_id "XLOC_022558"; transcript_id "TCONS_00037829"; exon_number "5"; oId "CUFF.41252.13"; tss_id "TSS28488"; |
| chr17 | Cufflinks exon77799884 | 77801523 | . | + | . | gene_id "XLOC_022558"; transcript_id "TCONS_00037829"; exon_number "6"; oId "CUFF.41252.13"; tss_id "TSS28488"; |
| chr17 | Cufflinks exon77793419 | 77793467 | . | + | . | gene_id "XLOC_022558"; transcript_id "TCONS_00037830"; exon_number "1"; oId "CUFF.41252.15"; tss_id "TSS28489"; |
| chr17 | Cufflinks exon77793621 | 77793872 | . | + | . | gene_id "XLOC_022558"; transcript_id "TCONS_00037830"; exon_number "2"; oId "CUFF.41252.15"; tss_id "TSS28489"; |
| chr17 | Cufflinks exon77796653 | 77796893 | . | + | . | gene_id "XLOC_022558"; transcript_id "TCONS_00037830"; exon_number "3"; oId "CUFF.41252.15"; tss_id "TSS28489"; |
| chr17 | Cufflinks exon77797214 | 77797337 | . | + | . | gene_id "XLOC_022558"; transcript_id "TCONS_00037830"; exon_number "4"; oId "CUFF.41252.15"; tss_id "TSS28489"; |
| chr17 | Cufflinks exon77797594 | 77797673 | . | + | . | gene_id "XLOC_022558"; transcript_id "TCONS_00037830"; exon_number "5"; oId "CUFF.41252.15"; tss_id "TSS28489"; |
| chr17 | Cufflinks exon77799883 | 77801523 | . | + | . | gene_id "XLOC_022558"; transcript_id "TCONS_00037830"; exon_number "6"; oId "CUFF.41252.15"; tss_id "TSS28489"; |
| chr17 | Cufflinks exon78427802 | 78427889 | . | + | . | gene_id "XLOC_022570"; transcript_id "TCONS_00037860"; exon_number "1"; oId "CUFF.41287.1"; tss_id "TSS28506";  |
| chr17 | Cufflinks exon78428257 | 78429554 | . | + | . | gene_id "XLOC_022570"; transcript_id "TCONS_00037860"; exon_number "2"; oId "CUFF.41287.1"; tss_id "TSS28506";  |
| chr17 | Cufflinks exon78427875 | 78427889 | . | + | . | gene_id "XLOC_022570"; transcript_id "TCONS_00037861"; exon_number "1"; oId "CUFF.41287.2"; tss_id "TSS28506";  |
| chr17 | Cufflinks exon78428260 | 78429554 | . | + | . | gene_id "XLOC_022570"; transcript_id "TCONS_00037861"; exon_number "2"; oId "CUFF.41287.2"; tss_id "TSS28506";  |
| chr17 | Cufflinks exon79029475 | 79029508 | . | + | . | gene_id "XLOC_022575"; transcript_id "TCONS_00037872"; exon_number "1"; oId "CUFF.41302.1"; tss_id "TSS28511";  |
| chr17 | Cufflinks exon79221901 | 79222988 | . | + | . | gene_id "XLOC_022575"; transcript_id "TCONS_00037872"; exon_number "2"; oId "CUFF.41302.1"; tss_id "TSS28511";  |
| chr17 | Cufflinks exon79482115 | 79482432 | . | + | . | gene_id "XLOC_022595"; transcript_id "TCONS_00037895"; exon_number "1"; oId "CUFF.41350.2"; tss_id "TSS28533";  |
| chr17 | Cufflinks exon79483062 | 79483271 | . | + | . | gene_id "XLOC_022595"; transcript_id "TCONS_00037895"; exon_number "2"; oId "CUFF.41350.2"; tss_id "TSS28533";  |
| chr17 | Cufflinks exon79484858 | 79485569 | . | + | . | gene_id "XLOC_022595"; transcript_id "TCONS_00037895"; exon_number "3"; oId "CUFF.41350.2"; tss_id "TSS28533";  |
| chr17 | Cufflinks exon79885705 | 79886321 | . | + | . | gene_id "XLOC_022612"; transcript_id "TCONS_00037913"; exon_number "1"; oId "CUFF.41412.1"; tss_id "TSS28550";  |
| chr17 | Cufflinks exon79887352 | 79889481 | . | + | . | gene_id "XLOC_022612"; transcript_id "TCONS_00037913"; exon_number "2"; oId "CUFF.41412.1"; tss_id "TSS28550";  |
| chr17 | Cufflinks exon79995743 | 79996144 | . | + | . | gene_id "XLOC_022616"; transcript_id "TCONS_00037921"; exon_number "1"; oId "CUFF.41421.1"; tss_id "TSS28557";  |
| chr17 | Cufflinks exon79997057 | 79997256 | . | + | . | gene_id "XLOC_022616"; transcript_id "TCONS_00037921"; exon_number "2"; oId "CUFF.41421.1"; tss_id "TSS28557";  |
| chr17 | Cufflinks exon80687363 | 80688208 | . | + | . | gene_id "XLOC_022637"; transcript_id "TCONS_00037952"; exon_number                                              |

"1"; oId "CUFF.41511.1"; tss\_id "TSS28583";  
chr17 Cufflinks exon80689252 80693365 . + . gene\_id "XLOC\_022637"; transcript\_id "TCONS\_00037952"; exon\_number  
"2"; oId "CUFF.41511.1"; tss\_id "TSS28583";  
chr17 Cufflinks exon81142034 81142240 . + . gene\_id "XLOC\_022642"; transcript\_id "TCONS\_00037967"; exon\_number  
"1"; oId "CUFF.41524.1"; tss\_id "TSS28594";  
chr17 Cufflinks exon81142895 81142992 . + . gene\_id "XLOC\_022642"; transcript\_id "TCONS\_00037967"; exon\_number  
"2"; oId "CUFF.41524.1"; tss\_id "TSS28594";  
chr17 Cufflinks exon81147572 81148587 . + . gene\_id "XLOC\_022642"; transcript\_id "TCONS\_00037967"; exon\_number  
"3"; oId "CUFF.41524.1"; tss\_id "TSS28594";  
chr17 Cufflinks exon81142034 81142240 . + . gene\_id "XLOC\_022642"; transcript\_id "TCONS\_00037968"; exon\_number  
"1"; oId "CUFF.41524.2"; tss\_id "TSS28594";  
chr17 Cufflinks exon81142895 81142992 . + . gene\_id "XLOC\_022642"; transcript\_id "TCONS\_00037968"; exon\_number  
"2"; oId "CUFF.41524.2"; tss\_id "TSS28594";  
chr17 Cufflinks exon81160137 81160316 . + . gene\_id "XLOC\_022642"; transcript\_id "TCONS\_00037968"; exon\_number  
"3"; oId "CUFF.41524.2"; tss\_id "TSS28594";  
chr17 Cufflinks exon81168656 81169219 . + . gene\_id "XLOC\_022642"; transcript\_id "TCONS\_00037968"; exon\_number  
"4"; oId "CUFF.41524.2"; tss\_id "TSS28594";  
chr17 Cufflinks exon1614798 1617308 . - . gene\_id "XLOC\_022680"; transcript\_id "TCONS\_00038041"; exon\_number "1"; oId  
"CUFF.37216.4"; tss\_id "TSS28651";  
chr17 Cufflinks exon1619424 1619566 . - . gene\_id "XLOC\_022680"; transcript\_id "TCONS\_00038041"; exon\_number "2"; oId  
"CUFF.37216.4"; tss\_id "TSS28651";  
chr17 Cufflinks exon1620331 1620435 . - . gene\_id "XLOC\_022680"; transcript\_id "TCONS\_00038041"; exon\_number "3"; oId  
"CUFF.37216.4"; tss\_id "TSS28651";  
chr17 Cufflinks exon1614798 1617308 . - . gene\_id "XLOC\_022680"; transcript\_id "TCONS\_00038042"; exon\_number "1"; oId  
"CUFF.37216.5"; tss\_id "TSS28651";  
chr17 Cufflinks exon1617665 1617747 . - . gene\_id "XLOC\_022680"; transcript\_id "TCONS\_00038042"; exon\_number "2"; oId  
"CUFF.37216.5"; tss\_id "TSS28651";  
chr17 Cufflinks exon1619424 1619566 . - . gene\_id "XLOC\_022680"; transcript\_id "TCONS\_00038042"; exon\_number "3"; oId  
"CUFF.37216.5"; tss\_id "TSS28651";  
chr17 Cufflinks exon1620331 1620457 . - . gene\_id "XLOC\_022680"; transcript\_id "TCONS\_00038042"; exon\_number "4"; oId  
"CUFF.37216.5"; tss\_id "TSS28651";  
chr17 Cufflinks exon2307656 2309419 . - . gene\_id "XLOC\_022692"; transcript\_id "TCONS\_00038060"; exon\_number "1"; oId  
"CUFF.37260.1"; tss\_id "TSS28667";  
chr17 Cufflinks exon2317058 2317681 . - . gene\_id "XLOC\_022692"; transcript\_id "TCONS\_00038060"; exon\_number "2"; oId  
"CUFF.37260.1"; tss\_id "TSS28667";  
chr17 Cufflinks exon4704438 4704750 . - . gene\_id "XLOC\_022740"; transcript\_id "TCONS\_00038160"; exon\_number "1"; oId  
"CUFF.37390.1"; tss\_id "TSS28741";  
chr17 Cufflinks exon4710222 4710334 . - . gene\_id "XLOC\_022740"; transcript\_id "TCONS\_00038160"; exon\_number "2"; oId  
"CUFF.37390.1"; tss\_id "TSS28741";  
chr17 Cufflinks exon4835258 4836628 . - . gene\_id "XLOC\_022743"; transcript\_id "TCONS\_00038163"; exon\_number "1"; oId  
"CUFF.37405.1"; tss\_id "TSS28745";  
chr17 Cufflinks exon4837638 4838518 . - . gene\_id "XLOC\_022743"; transcript\_id "TCONS\_00038163"; exon\_number "2"; oId  
"CUFF.37405.1"; tss\_id "TSS28745";



|       |                        |          |   |   |   |                                                                                                                |
|-------|------------------------|----------|---|---|---|----------------------------------------------------------------------------------------------------------------|
| chr17 | Cufflinks exon6888442  | 6888859  | . | - | . | gene_id "XLOC_022783"; transcript_id "TCONS_00038237"; exon_number "1"; oId "CUFF.37525.1"; tss_id "TSS28792"; |
| chr17 | Cufflinks exon6913115  | 6913208  | . | - | . | gene_id "XLOC_022783"; transcript_id "TCONS_00038237"; exon_number "2"; oId "CUFF.37525.1"; tss_id "TSS28792"; |
| chr17 | Cufflinks exon6915515  | 6915653  | . | - | . | gene_id "XLOC_022783"; transcript_id "TCONS_00038237"; exon_number "3"; oId "CUFF.37525.1"; tss_id "TSS28792"; |
| chr17 | Cufflinks exon6898103  | 6900400  | . | - | . | gene_id "XLOC_022783"; transcript_id "TCONS_00038240"; exon_number "1"; oId "CUFF.37525.4"; tss_id "TSS28792"; |
| chr17 | Cufflinks exon6905803  | 6905939  | . | - | . | gene_id "XLOC_022783"; transcript_id "TCONS_00038240"; exon_number "2"; oId "CUFF.37525.4"; tss_id "TSS28792"; |
| chr17 | Cufflinks exon6913115  | 6913208  | . | - | . | gene_id "XLOC_022783"; transcript_id "TCONS_00038240"; exon_number "3"; oId "CUFF.37525.4"; tss_id "TSS28792"; |
| chr17 | Cufflinks exon6915515  | 6915653  | . | - | . | gene_id "XLOC_022783"; transcript_id "TCONS_00038240"; exon_number "4"; oId "CUFF.37525.4"; tss_id "TSS28792"; |
| chr17 | Cufflinks exon6898103  | 6900400  | . | - | . | gene_id "XLOC_022783"; transcript_id "TCONS_00038239"; exon_number "1"; oId "CUFF.37525.3"; tss_id "TSS28792"; |
| chr17 | Cufflinks exon6903638  | 6905939  | . | - | . | gene_id "XLOC_022783"; transcript_id "TCONS_00038239"; exon_number "2"; oId "CUFF.37525.3"; tss_id "TSS28792"; |
| chr17 | Cufflinks exon6913115  | 6913208  | . | - | . | gene_id "XLOC_022783"; transcript_id "TCONS_00038239"; exon_number "3"; oId "CUFF.37525.3"; tss_id "TSS28792"; |
| chr17 | Cufflinks exon6915515  | 6915653  | . | - | . | gene_id "XLOC_022783"; transcript_id "TCONS_00038239"; exon_number "4"; oId "CUFF.37525.3"; tss_id "TSS28792"; |
| chr17 | Cufflinks exon6902060  | 6905939  | . | - | . | gene_id "XLOC_022783"; transcript_id "TCONS_00038241"; exon_number "1"; oId "CUFF.37525.5"; tss_id "TSS28792"; |
| chr17 | Cufflinks exon6915515  | 6915653  | . | - | . | gene_id "XLOC_022783"; transcript_id "TCONS_00038241"; exon_number "2"; oId "CUFF.37525.5"; tss_id "TSS28792"; |
| chr17 | Cufflinks exon7461129  | 7464884  | . | - | . | gene_id "XLOC_022810"; transcript_id "TCONS_00038282"; exon_number "1"; oId "CUFF.37597.2"; tss_id "TSS28825"; |
| chr17 | Cufflinks exon7464967  | 7465189  | . | - | . | gene_id "XLOC_022810"; transcript_id "TCONS_00038282"; exon_number "2"; oId "CUFF.37597.2"; tss_id "TSS28825"; |
| chr17 | Cufflinks exon7461129  | 7464873  | . | - | . | gene_id "XLOC_022810"; transcript_id "TCONS_00038281"; exon_number "1"; oId "CUFF.37597.1"; tss_id "TSS28825"; |
| chr17 | Cufflinks exon7464967  | 7465189  | . | - | . | gene_id "XLOC_022810"; transcript_id "TCONS_00038281"; exon_number "2"; oId "CUFF.37597.1"; tss_id "TSS28825"; |
| chr17 | Cufflinks exon8123948  | 8124827  | . | - | . | gene_id "XLOC_022847"; transcript_id "TCONS_00038342"; exon_number "1"; oId "CUFF.37689.1"; tss_id "TSS28870"; |
| chr17 | Cufflinks exon8125611  | 8126592  | . | - | . | gene_id "XLOC_022847"; transcript_id "TCONS_00038342"; exon_number "2"; oId "CUFF.37689.1"; tss_id "TSS28870"; |
| chr17 | Cufflinks exon8127130  | 8127361  | . | - | . | gene_id "XLOC_022847"; transcript_id "TCONS_00038342"; exon_number "3"; oId "CUFF.37689.1"; tss_id "TSS28870"; |
| chr17 | Cufflinks exon13679734 | 13680666 | . | - | . | gene_id "XLOC_022913"; transcript_id "TCONS_00038440"; exon_number "1"; oId "CUFF.37837.4"; tss_id "TSS28946"; |
| chr17 | Cufflinks exon13680793 | 13681344 | . | - | . | gene_id "XLOC_022913"; transcript_id "TCONS_00038440"; exon_number                                             |

|                                             |                |          |          |   |                                                                        |
|---------------------------------------------|----------------|----------|----------|---|------------------------------------------------------------------------|
| "2"; oId "CUFF.37837.4"; tss_id "TSS28946"; |                |          |          |   |                                                                        |
| chr17                                       | Cufflinks exon | 13682836 | 13682887 | . | - . gene_id "XLOC_022913"; transcript_id "TCONS_00038440"; exon_number |
| "3"; oId "CUFF.37837.4"; tss_id "TSS28946"; |                |          |          |   |                                                                        |
| chr17                                       | Cufflinks exon | 13679734 | 13680666 | . | - . gene_id "XLOC_022913"; transcript_id "TCONS_00038441"; exon_number |
| "1"; oId "CUFF.37837.3"; tss_id "TSS28947"; |                |          |          |   |                                                                        |
| chr17                                       | Cufflinks exon | 13680793 | 13683165 | . | - . gene_id "XLOC_022913"; transcript_id "TCONS_00038441"; exon_number |
| "2"; oId "CUFF.37837.3"; tss_id "TSS28947"; |                |          |          |   |                                                                        |
| chr17                                       | Cufflinks exon | 13679734 | 13680666 | . | - . gene_id "XLOC_022913"; transcript_id "TCONS_00038442"; exon_number |
| "1"; oId "CUFF.37837.2"; tss_id "TSS28948"; |                |          |          |   |                                                                        |
| chr17                                       | Cufflinks exon | 13693586 | 13693630 | . | - . gene_id "XLOC_022913"; transcript_id "TCONS_00038442"; exon_number |
| "2"; oId "CUFF.37837.2"; tss_id "TSS28948"; |                |          |          |   |                                                                        |
| chr17                                       | Cufflinks exon | 13694281 | 13694357 | . | - . gene_id "XLOC_022913"; transcript_id "TCONS_00038442"; exon_number |
| "3"; oId "CUFF.37837.2"; tss_id "TSS28948"; |                |          |          |   |                                                                        |
| chr17                                       | Cufflinks exon | 13783626 | 13783648 | . | - . gene_id "XLOC_022913"; transcript_id "TCONS_00038442"; exon_number |
| "4"; oId "CUFF.37837.2"; tss_id "TSS28948"; |                |          |          |   |                                                                        |
| chr17                                       | Cufflinks exon | 13679734 | 13680666 | . | - . gene_id "XLOC_022913"; transcript_id "TCONS_00038443"; exon_number |
| "1"; oId "CUFF.37837.5"; tss_id "TSS28948"; |                |          |          |   |                                                                        |
| chr17                                       | Cufflinks exon | 13693586 | 13693630 | . | - . gene_id "XLOC_022913"; transcript_id "TCONS_00038443"; exon_number |
| "2"; oId "CUFF.37837.5"; tss_id "TSS28948"; |                |          |          |   |                                                                        |
| chr17                                       | Cufflinks exon | 13783619 | 13783654 | . | - . gene_id "XLOC_022913"; transcript_id "TCONS_00038443"; exon_number |
| "3"; oId "CUFF.37837.5"; tss_id "TSS28948"; |                |          |          |   |                                                                        |
| chr17                                       | Cufflinks exon | 13679734 | 13680666 | . | - . gene_id "XLOC_022913"; transcript_id "TCONS_00038444"; exon_number |
| "1"; oId "CUFF.37837.6"; tss_id "TSS28948"; |                |          |          |   |                                                                        |
| chr17                                       | Cufflinks exon | 13783619 | 13783684 | . | - . gene_id "XLOC_022913"; transcript_id "TCONS_00038444"; exon_number |
| "2"; oId "CUFF.37837.6"; tss_id "TSS28948"; |                |          |          |   |                                                                        |
| chr17                                       | Cufflinks exon | 13679734 | 13680666 | . | - . gene_id "XLOC_022913"; transcript_id "TCONS_00038445"; exon_number |
| "1"; oId "CUFF.37837.1"; tss_id "TSS28948"; |                |          |          |   |                                                                        |
| chr17                                       | Cufflinks exon | 13693586 | 13693630 | . | - . gene_id "XLOC_022913"; transcript_id "TCONS_00038445"; exon_number |
| "2"; oId "CUFF.37837.1"; tss_id "TSS28948"; |                |          |          |   |                                                                        |
| chr17                                       | Cufflinks exon | 13694281 | 13694350 | . | - . gene_id "XLOC_022913"; transcript_id "TCONS_00038445"; exon_number |
| "3"; oId "CUFF.37837.1"; tss_id "TSS28948"; |                |          |          |   |                                                                        |
| chr17                                       | Cufflinks exon | 13729815 | 13729914 | . | - . gene_id "XLOC_022913"; transcript_id "TCONS_00038445"; exon_number |
| "4"; oId "CUFF.37837.1"; tss_id "TSS28948"; |                |          |          |   |                                                                        |
| chr17                                       | Cufflinks exon | 13783619 | 13783685 | . | - . gene_id "XLOC_022913"; transcript_id "TCONS_00038445"; exon_number |
| "5"; oId "CUFF.37837.1"; tss_id "TSS28948"; |                |          |          |   |                                                                        |
| chr17                                       | Cufflinks exon | 13782943 | 13783688 | . | - . gene_id "XLOC_022913"; transcript_id "TCONS_00038455"; exon_number |
| "1"; oId "CUFF.37837.8"; tss_id "TSS28949"; |                |          |          |   |                                                                        |
| chr17                                       | Cufflinks exon | 13801926 | 13802138 | . | - . gene_id "XLOC_022913"; transcript_id "TCONS_00038455"; exon_number |
| "2"; oId "CUFF.37837.8"; tss_id "TSS28949"; |                |          |          |   |                                                                        |
| chr17                                       | Cufflinks exon | 17286641 | 17287083 | . | - . gene_id "XLOC_022989"; transcript_id "TCONS_00038559"; exon_number |
| "1"; oId "CUFF.38093.2"; tss_id "TSS29041"; |                |          |          |   |                                                                        |
| chr17                                       | Cufflinks exon | 17348740 | 17348749 | . | - . gene_id "XLOC_022989"; transcript_id "TCONS_00038559"; exon_number |
| "2"; oId "CUFF.38093.2"; tss_id "TSS29041"; |                |          |          |   |                                                                        |

|       |                |          |          |   |   |   |                                                                                                                |
|-------|----------------|----------|----------|---|---|---|----------------------------------------------------------------------------------------------------------------|
| chr17 | Cufflinks exon | 19799895 | 19806299 | . | - | . | gene_id "XLOC_023035"; transcript_id "TCONS_00038640"; exon_number "1"; oId "CUFF.38244.1"; tss_id "TSS29100"; |
| chr17 | Cufflinks exon | 19923733 | 19923757 | . | - | . | gene_id "XLOC_023035"; transcript_id "TCONS_00038640"; exon_number "2"; oId "CUFF.38244.1"; tss_id "TSS29100"; |
| chr17 | Cufflinks exon | 21078504 | 21079232 | . | - | . | gene_id "XLOC_023049"; transcript_id "TCONS_00038660"; exon_number "1"; oId "CUFF.38301.1"; tss_id "TSS29116"; |
| chr17 | Cufflinks exon | 21081637 | 21081813 | . | - | . | gene_id "XLOC_023049"; transcript_id "TCONS_00038660"; exon_number "2"; oId "CUFF.38301.1"; tss_id "TSS29116"; |
| chr17 | Cufflinks exon | 21094057 | 21098749 | . | - | . | gene_id "XLOC_023049"; transcript_id "TCONS_00038660"; exon_number "3"; oId "CUFF.38301.1"; tss_id "TSS29116"; |
| chr17 | Cufflinks exon | 27621473 | 27621616 | . | - | . | gene_id "XLOC_023113"; transcript_id "TCONS_00038767"; exon_number "1"; oId "CUFF.38459.1"; tss_id "TSS29199"; |
| chr17 | Cufflinks exon | 27697165 | 27697323 | . | - | . | gene_id "XLOC_023113"; transcript_id "TCONS_00038767"; exon_number "2"; oId "CUFF.38459.1"; tss_id "TSS29199"; |
| chr17 | Cufflinks exon | 27716955 | 27717251 | . | - | . | gene_id "XLOC_023113"; transcript_id "TCONS_00038767"; exon_number "3"; oId "CUFF.38459.1"; tss_id "TSS29199"; |
| chr17 | Cufflinks exon | 27695570 | 27697323 | . | - | . | gene_id "XLOC_023113"; transcript_id "TCONS_00038770"; exon_number "1"; oId "CUFF.38459.3"; tss_id "TSS29199"; |
| chr17 | Cufflinks exon | 27716955 | 27717287 | . | - | . | gene_id "XLOC_023113"; transcript_id "TCONS_00038770"; exon_number "2"; oId "CUFF.38459.3"; tss_id "TSS29199"; |
| chr17 | Cufflinks exon | 33558933 | 33559661 | . | - | . | gene_id "XLOC_023164"; transcript_id "TCONS_00038852"; exon_number "1"; oId "CUFF.38723.1"; tss_id "TSS29266"; |
| chr17 | Cufflinks exon | 33568518 | 33568928 | . | - | . | gene_id "XLOC_023164"; transcript_id "TCONS_00038852"; exon_number "2"; oId "CUFF.38723.1"; tss_id "TSS29266"; |
| chr17 | Cufflinks exon | 33569037 | 33569358 | . | - | . | gene_id "XLOC_023164"; transcript_id "TCONS_00038852"; exon_number "3"; oId "CUFF.38723.1"; tss_id "TSS29266"; |
| chr17 | Cufflinks exon | 35028933 | 35029291 | . | - | . | gene_id "XLOC_023200"; transcript_id "TCONS_00038919"; exon_number "1"; oId "CUFF.38839.1"; tss_id "TSS29311"; |
| chr17 | Cufflinks exon | 35029536 | 35029764 | . | - | . | gene_id "XLOC_023200"; transcript_id "TCONS_00038919"; exon_number "2"; oId "CUFF.38839.1"; tss_id "TSS29311"; |
| chr17 | Cufflinks exon | 35030649 | 35030759 | . | - | . | gene_id "XLOC_023200"; transcript_id "TCONS_00038919"; exon_number "3"; oId "CUFF.38839.1"; tss_id "TSS29311"; |
| chr17 | Cufflinks exon | 35028933 | 35029291 | . | - | . | gene_id "XLOC_023200"; transcript_id "TCONS_00038920"; exon_number "1"; oId "CUFF.38839.2"; tss_id "TSS29311"; |
| chr17 | Cufflinks exon | 35029536 | 35029762 | . | - | . | gene_id "XLOC_023200"; transcript_id "TCONS_00038920"; exon_number "2"; oId "CUFF.38839.2"; tss_id "TSS29311"; |
| chr17 | Cufflinks exon | 35030517 | 35030818 | . | - | . | gene_id "XLOC_023200"; transcript_id "TCONS_00038920"; exon_number "3"; oId "CUFF.38839.2"; tss_id "TSS29311"; |
| chr17 | Cufflinks exon | 37165340 | 37165956 | . | - | . | gene_id "XLOC_023233"; transcript_id "TCONS_00038994"; exon_number "1"; oId "CUFF.38938.1"; tss_id "TSS29362"; |
| chr17 | Cufflinks exon | 37169187 | 37169282 | . | - | . | gene_id "XLOC_023233"; transcript_id "TCONS_00038994"; exon_number "2"; oId "CUFF.38938.1"; tss_id "TSS29362"; |
| chr17 | Cufflinks exon | 37183803 | 37184246 | . | - | . | gene_id "XLOC_023233"; transcript_id "TCONS_00038994"; exon_number "3"; oId "CUFF.38938.1"; tss_id "TSS29362"; |

"3"; oId "CUFF.38938.1"; tss\_id "TSS29362";  
chr17 Cufflinks exon37169587 37169664 . - . gene\_id "XLOC\_023233"; transcript\_id "TCONS\_00038995"; exon\_number  
"1"; oId "CUFF.38938.2"; tss\_id "TSS29362";  
chr17 Cufflinks exon37183803 37184246 . - . gene\_id "XLOC\_023233"; transcript\_id "TCONS\_00038995"; exon\_number  
"2"; oId "CUFF.38938.2"; tss\_id "TSS29362";  
chr17 Cufflinks exon40190265 40193207 . - . gene\_id "XLOC\_023299"; transcript\_id "TCONS\_00039133"; exon\_number  
"1"; oId "CUFF.39166.2"; tss\_id "TSS29458";  
chr17 Cufflinks exon40194852 40195581 . - . gene\_id "XLOC\_023299"; transcript\_id "TCONS\_00039133"; exon\_number  
"2"; oId "CUFF.39166.2"; tss\_id "TSS29458";  
chr17 Cufflinks exon40202037 40202511 . - . gene\_id "XLOC\_023299"; transcript\_id "TCONS\_00039133"; exon\_number  
"3"; oId "CUFF.39166.2"; tss\_id "TSS29458";  
chr17 Cufflinks exon40190265 40193207 . - . gene\_id "XLOC\_023299"; transcript\_id "TCONS\_00039134"; exon\_number  
"1"; oId "CUFF.39166.3"; tss\_id "TSS29459";  
chr17 Cufflinks exon40194852 40195581 . - . gene\_id "XLOC\_023299"; transcript\_id "TCONS\_00039134"; exon\_number  
"2"; oId "CUFF.39166.3"; tss\_id "TSS29459";  
chr17 Cufflinks exon40202592 40202613 . - . gene\_id "XLOC\_023299"; transcript\_id "TCONS\_00039134"; exon\_number  
"3"; oId "CUFF.39166.3"; tss\_id "TSS29459";  
chr17 Cufflinks exon40190265 40193207 . - . gene\_id "XLOC\_023299"; transcript\_id "TCONS\_00039135"; exon\_number  
"1"; oId "CUFF.39166.4"; tss\_id "TSS29460";  
chr17 Cufflinks exon40194852 40195581 . - . gene\_id "XLOC\_023299"; transcript\_id "TCONS\_00039135"; exon\_number  
"2"; oId "CUFF.39166.4"; tss\_id "TSS29460";  
chr17 Cufflinks exon40202575 40202782 . - . gene\_id "XLOC\_023299"; transcript\_id "TCONS\_00039135"; exon\_number  
"3"; oId "CUFF.39166.4"; tss\_id "TSS29460";  
chr17 Cufflinks exon40190265 40193207 . - . gene\_id "XLOC\_023299"; transcript\_id "TCONS\_00039136"; exon\_number  
"1"; oId "CUFF.39166.1"; tss\_id "TSS29461";  
chr17 Cufflinks exon40194852 40195581 . - . gene\_id "XLOC\_023299"; transcript\_id "TCONS\_00039136"; exon\_number  
"2"; oId "CUFF.39166.1"; tss\_id "TSS29461";  
chr17 Cufflinks exon40214825 40214839 . - . gene\_id "XLOC\_023299"; transcript\_id "TCONS\_00039136"; exon\_number  
"3"; oId "CUFF.39166.1"; tss\_id "TSS29461";  
chr17 Cufflinks exon41456176 41456253 . - . gene\_id "XLOC\_023351"; transcript\_id "TCONS\_00039235"; exon\_number  
"1"; oId "CUFF.39311.7"; tss\_id "TSS29534";  
chr17 Cufflinks exon41456491 41456630 . - . gene\_id "XLOC\_023351"; transcript\_id "TCONS\_00039235"; exon\_number  
"2"; oId "CUFF.39311.7"; tss\_id "TSS29534";  
chr17 Cufflinks exon41458641 41459028 . - . gene\_id "XLOC\_023351"; transcript\_id "TCONS\_00039235"; exon\_number  
"3"; oId "CUFF.39311.7"; tss\_id "TSS29534";  
chr17 Cufflinks exon41465873 41466791 . - . gene\_id "XLOC\_023351"; transcript\_id "TCONS\_00039235"; exon\_number  
"4"; oId "CUFF.39311.7"; tss\_id "TSS29534";  
chr17 Cufflinks exon41991869 41992138 . - . gene\_id "XLOC\_023364"; transcript\_id "TCONS\_00039257"; exon\_number  
"1"; oId "CUFF.39356.2"; tss\_id "TSS29551";  
chr17 Cufflinks exon41994661 41995597 . - . gene\_id "XLOC\_023364"; transcript\_id "TCONS\_00039257"; exon\_number  
"2"; oId "CUFF.39356.2"; tss\_id "TSS29551";  
chr17 Cufflinks exon41991869 41992138 . - . gene\_id "XLOC\_023364"; transcript\_id "TCONS\_00039256"; exon\_number  
"1"; oId "CUFF.39356.1"; tss\_id "TSS29551";

|       |                        |          |   |   |   |                                                                                                                 |
|-------|------------------------|----------|---|---|---|-----------------------------------------------------------------------------------------------------------------|
| chr17 | Cufflinks exon41994506 | 41994566 | . | - | . | gene_id "XLOC_023364"; transcript_id "TCONS_00039256"; exon_number "2"; oId "CUFF.39356.1"; tss_id "TSS29551";  |
| chr17 | Cufflinks exon41994661 | 41995597 | . | - | . | gene_id "XLOC_023364"; transcript_id "TCONS_00039256"; exon_number "3"; oId "CUFF.39356.1"; tss_id "TSS29551";  |
| chr17 | Cufflinks exon42253342 | 42255184 | . | - | . | gene_id "XLOC_023375"; transcript_id "TCONS_00039274"; exon_number "1"; oId "CUFF.39394.2"; tss_id "TSS29565";  |
| chr17 | Cufflinks exon42258991 | 42259088 | . | - | . | gene_id "XLOC_023375"; transcript_id "TCONS_00039274"; exon_number "2"; oId "CUFF.39394.2"; tss_id "TSS29565";  |
| chr17 | Cufflinks exon42260298 | 42260461 | . | - | . | gene_id "XLOC_023375"; transcript_id "TCONS_00039274"; exon_number "3"; oId "CUFF.39394.2"; tss_id "TSS29565";  |
| chr17 | Cufflinks exon42263933 | 42264085 | . | - | . | gene_id "XLOC_023375"; transcript_id "TCONS_00039274"; exon_number "4"; oId "CUFF.39394.2"; tss_id "TSS29565";  |
| chr17 | Cufflinks exon42253342 | 42255184 | . | - | . | gene_id "XLOC_023375"; transcript_id "TCONS_00039275"; exon_number "1"; oId "CUFF.39394.3"; tss_id "TSS29565";  |
| chr17 | Cufflinks exon42258991 | 42259088 | . | - | . | gene_id "XLOC_023375"; transcript_id "TCONS_00039275"; exon_number "2"; oId "CUFF.39394.3"; tss_id "TSS29565";  |
| chr17 | Cufflinks exon42263933 | 42264087 | . | - | . | gene_id "XLOC_023375"; transcript_id "TCONS_00039275"; exon_number "3"; oId "CUFF.39394.3"; tss_id "TSS29565";  |
| chr17 | Cufflinks exon42253342 | 42255185 | . | - | . | gene_id "XLOC_023375"; transcript_id "TCONS_00039276"; exon_number "1"; oId "CUFF.39394.4"; tss_id "TSS29565";  |
| chr17 | Cufflinks exon42258992 | 42259088 | . | - | . | gene_id "XLOC_023375"; transcript_id "TCONS_00039276"; exon_number "2"; oId "CUFF.39394.4"; tss_id "TSS29565";  |
| chr17 | Cufflinks exon42263933 | 42264088 | . | - | . | gene_id "XLOC_023375"; transcript_id "TCONS_00039276"; exon_number "3"; oId "CUFF.39394.4"; tss_id "TSS29565";  |
| chr17 | Cufflinks exon42255190 | 42257014 | . | - | . | gene_id "XLOC_023375"; transcript_id "TCONS_00039277"; exon_number "1"; oId "CUFF.39394.5"; tss_id "TSS29565";  |
| chr17 | Cufflinks exon42258991 | 42259088 | . | - | . | gene_id "XLOC_023375"; transcript_id "TCONS_00039277"; exon_number "2"; oId "CUFF.39394.5"; tss_id "TSS29565";  |
| chr17 | Cufflinks exon42260298 | 42260461 | . | - | . | gene_id "XLOC_023375"; transcript_id "TCONS_00039277"; exon_number "3"; oId "CUFF.39394.5"; tss_id "TSS29565";  |
| chr17 | Cufflinks exon42263933 | 42264088 | . | - | . | gene_id "XLOC_023375"; transcript_id "TCONS_00039277"; exon_number "4"; oId "CUFF.39394.5"; tss_id "TSS29565";  |
| chr17 | Cufflinks exon45112420 | 45112492 | . | - | . | gene_id "XLOC_023461"; transcript_id "TCONS_00039446"; exon_number "1"; oId "CUFF.39697.3"; tss_id "TSS29691";  |
| chr17 | Cufflinks exon45133826 | 45134119 | . | - | . | gene_id "XLOC_023461"; transcript_id "TCONS_00039446"; exon_number "2"; oId "CUFF.39697.3"; tss_id "TSS29691";  |
| chr17 | Cufflinks exon45177201 | 45177620 | . | - | . | gene_id "XLOC_023461"; transcript_id "TCONS_00039446"; exon_number "3"; oId "CUFF.39697.3"; tss_id "TSS29691";  |
| chr17 | Cufflinks exon45158893 | 45159716 | . | - | . | gene_id "XLOC_023461"; transcript_id "TCONS_00039454"; exon_number "1"; oId "CUFF.39697.11"; tss_id "TSS29691"; |
| chr17 | Cufflinks exon45177201 | 45177620 | . | - | . | gene_id "XLOC_023461"; transcript_id "TCONS_00039454"; exon_number "2"; oId "CUFF.39697.11"; tss_id "TSS29691"; |
| chr17 | Cufflinks exon45968456 | 45968947 | . | - | . | gene_id "XLOC_023494"; transcript_id "TCONS_00039493"; exon_number                                              |

|                                             |   |   |   |                                                                    |  |
|---------------------------------------------|---|---|---|--------------------------------------------------------------------|--|
| "1"; oId "CUFF.39796.1"; tss_id "TSS29734"; |   |   |   |                                                                    |  |
| chr17 Cufflinks exon45971266 45971324       | . | - | . | gene_id "XLOC_023494"; transcript_id "TCONS_00039493"; exon_number |  |
| "2"; oId "CUFF.39796.1"; tss_id "TSS29734"; |   |   |   |                                                                    |  |
| chr17 Cufflinks exon45973069 45973189       | . | - | . | gene_id "XLOC_023494"; transcript_id "TCONS_00039493"; exon_number |  |
| "3"; oId "CUFF.39796.1"; tss_id "TSS29734"; |   |   |   |                                                                    |  |
| chr17 Cufflinks exon45975639 45976669       | . | - | . | gene_id "XLOC_023495"; transcript_id "TCONS_00039496"; exon_number |  |
| "1"; oId "CUFF.39798.3"; tss_id "TSS29735"; |   |   |   |                                                                    |  |
| chr17 Cufflinks exon45995818 45995937       | . | - | . | gene_id "XLOC_023495"; transcript_id "TCONS_00039496"; exon_number |  |
| "2"; oId "CUFF.39798.3"; tss_id "TSS29735"; |   |   |   |                                                                    |  |
| chr17 Cufflinks exon46018713 46018770       | . | - | . | gene_id "XLOC_023495"; transcript_id "TCONS_00039496"; exon_number |  |
| "3"; oId "CUFF.39798.3"; tss_id "TSS29735"; |   |   |   |                                                                    |  |
| chr17 Cufflinks exon45975639 45977744       | . | - | . | gene_id "XLOC_023495"; transcript_id "TCONS_00039497"; exon_number |  |
| "1"; oId "CUFF.39798.4"; tss_id "TSS29735"; |   |   |   |                                                                    |  |
| chr17 Cufflinks exon45995818 45995937       | . | - | . | gene_id "XLOC_023495"; transcript_id "TCONS_00039497"; exon_number |  |
| "2"; oId "CUFF.39798.4"; tss_id "TSS29735"; |   |   |   |                                                                    |  |
| chr17 Cufflinks exon46018702 46018770       | . | - | . | gene_id "XLOC_023495"; transcript_id "TCONS_00039497"; exon_number |  |
| "3"; oId "CUFF.39798.4"; tss_id "TSS29735"; |   |   |   |                                                                    |  |
| chr17 Cufflinks exon45975639 45976669       | . | - | . | gene_id "XLOC_023495"; transcript_id "TCONS_00039494"; exon_number |  |
| "1"; oId "CUFF.39798.1"; tss_id "TSS29735"; |   |   |   |                                                                    |  |
| chr17 Cufflinks exon45995818 45995937       | . | - | . | gene_id "XLOC_023495"; transcript_id "TCONS_00039494"; exon_number |  |
| "2"; oId "CUFF.39798.1"; tss_id "TSS29735"; |   |   |   |                                                                    |  |
| chr17 Cufflinks exon46018702 46018770       | . | - | . | gene_id "XLOC_023495"; transcript_id "TCONS_00039494"; exon_number |  |
| "3"; oId "CUFF.39798.1"; tss_id "TSS29735"; |   |   |   |                                                                    |  |
| chr17 Cufflinks exon46121745 46124332       | . | - | . | gene_id "XLOC_023498"; transcript_id "TCONS_00039502"; exon_number |  |
| "1"; oId "CUFF.39814.1"; tss_id "TSS29739"; |   |   |   |                                                                    |  |
| chr17 Cufflinks exon46124571 46124816       | . | - | . | gene_id "XLOC_023498"; transcript_id "TCONS_00039502"; exon_number |  |
| "2"; oId "CUFF.39814.1"; tss_id "TSS29739"; |   |   |   |                                                                    |  |
| chr17 Cufflinks exon46125139 46125442       | . | - | . | gene_id "XLOC_023498"; transcript_id "TCONS_00039502"; exon_number |  |
| "3"; oId "CUFF.39814.1"; tss_id "TSS29739"; |   |   |   |                                                                    |  |
| chr17 Cufflinks exon46121745 46124332       | . | - | . | gene_id "XLOC_023498"; transcript_id "TCONS_00039504"; exon_number |  |
| "1"; oId "CUFF.39814.2"; tss_id "TSS29739"; |   |   |   |                                                                    |  |
| chr17 Cufflinks exon46125139 46125450       | . | - | . | gene_id "XLOC_023498"; transcript_id "TCONS_00039504"; exon_number |  |
| "2"; oId "CUFF.39814.2"; tss_id "TSS29739"; |   |   |   |                                                                    |  |
| chr17 Cufflinks exon46121745 46124332       | . | - | . | gene_id "XLOC_023498"; transcript_id "TCONS_00039506"; exon_number |  |
| "1"; oId "CUFF.39814.4"; tss_id "TSS29739"; |   |   |   |                                                                    |  |
| chr17 Cufflinks exon46124987 46125513       | . | - | . | gene_id "XLOC_023498"; transcript_id "TCONS_00039506"; exon_number |  |
| "2"; oId "CUFF.39814.4"; tss_id "TSS29739"; |   |   |   |                                                                    |  |
| chr17 Cufflinks exon46121745 46124332       | . | - | . | gene_id "XLOC_023498"; transcript_id "TCONS_00039505"; exon_number |  |
| "1"; oId "CUFF.39814.3"; tss_id "TSS29739"; |   |   |   |                                                                    |  |
| chr17 Cufflinks exon46124571 46124816       | . | - | . | gene_id "XLOC_023498"; transcript_id "TCONS_00039505"; exon_number |  |
| "2"; oId "CUFF.39814.3"; tss_id "TSS29739"; |   |   |   |                                                                    |  |
| chr17 Cufflinks exon46124987 46125513       | . | - | . | gene_id "XLOC_023498"; transcript_id "TCONS_00039505"; exon_number |  |
| "3"; oId "CUFF.39814.3"; tss_id "TSS29739"; |   |   |   |                                                                    |  |

|       |                        |          |   |   |   |                                                                                                                |
|-------|------------------------|----------|---|---|---|----------------------------------------------------------------------------------------------------------------|
| chr17 | Cufflinks exon46980627 | 46981186 | . | - | . | gene_id "XLOC_023515"; transcript_id "TCONS_00039530"; exon_number "1"; oId "CUFF.39869.1"; tss_id "TSS29761"; |
| chr17 | Cufflinks exon47229031 | 47229065 | . | - | . | gene_id "XLOC_023515"; transcript_id "TCONS_00039530"; exon_number "2"; oId "CUFF.39869.1"; tss_id "TSS29761"; |
| chr17 | Cufflinks exon55155286 | 55156064 | . | - | . | gene_id "XLOC_023603"; transcript_id "TCONS_00039668"; exon_number "1"; oId "CUFF.40159.4"; tss_id "TSS29869"; |
| chr17 | Cufflinks exon55156648 | 55156771 | . | - | . | gene_id "XLOC_023603"; transcript_id "TCONS_00039668"; exon_number "2"; oId "CUFF.40159.4"; tss_id "TSS29869"; |
| chr17 | Cufflinks exon55161965 | 55162374 | . | - | . | gene_id "XLOC_023603"; transcript_id "TCONS_00039668"; exon_number "3"; oId "CUFF.40159.4"; tss_id "TSS29869"; |
| chr17 | Cufflinks exon55155286 | 55156064 | . | - | . | gene_id "XLOC_023603"; transcript_id "TCONS_00039667"; exon_number "1"; oId "CUFF.40159.3"; tss_id "TSS29869"; |
| chr17 | Cufflinks exon55156648 | 55156771 | . | - | . | gene_id "XLOC_023603"; transcript_id "TCONS_00039667"; exon_number "2"; oId "CUFF.40159.3"; tss_id "TSS29869"; |
| chr17 | Cufflinks exon55162201 | 55162374 | . | - | . | gene_id "XLOC_023603"; transcript_id "TCONS_00039667"; exon_number "3"; oId "CUFF.40159.3"; tss_id "TSS29869"; |
| chr17 | Cufflinks exon56406443 | 56408623 | . | - | . | gene_id "XLOC_023629"; transcript_id "TCONS_00039724"; exon_number "1"; oId "CUFF.40230.5"; tss_id "TSS29905"; |
| chr17 | Cufflinks exon56409831 | 56409872 | . | - | . | gene_id "XLOC_023629"; transcript_id "TCONS_00039724"; exon_number "2"; oId "CUFF.40230.5"; tss_id "TSS29905"; |
| chr17 | Cufflinks exon56410022 | 56410534 | . | - | . | gene_id "XLOC_023635"; transcript_id "TCONS_00039726"; exon_number "1"; oId "CUFF.40238.2"; tss_id "TSS29912"; |
| chr17 | Cufflinks exon56411372 | 56411416 | . | - | . | gene_id "XLOC_023635"; transcript_id "TCONS_00039726"; exon_number "2"; oId "CUFF.40238.2"; tss_id "TSS29912"; |
| chr17 | Cufflinks exon58200909 | 58200929 | . | - | . | gene_id "XLOC_023655"; transcript_id "TCONS_00039770"; exon_number "1"; oId "CUFF.40321.1"; tss_id "TSS29941"; |
| chr17 | Cufflinks exon58212117 | 58213074 | . | - | . | gene_id "XLOC_023655"; transcript_id "TCONS_00039770"; exon_number "2"; oId "CUFF.40321.1"; tss_id "TSS29941"; |
| chr17 | Cufflinks exon58203900 | 58204226 | . | - | . | gene_id "XLOC_023655"; transcript_id "TCONS_00039771"; exon_number "1"; oId "CUFF.40321.4"; tss_id "TSS29942"; |
| chr17 | Cufflinks exon58205902 | 58206020 | . | - | . | gene_id "XLOC_023655"; transcript_id "TCONS_00039771"; exon_number "2"; oId "CUFF.40321.4"; tss_id "TSS29942"; |
| chr17 | Cufflinks exon58209797 | 58210273 | . | - | . | gene_id "XLOC_023655"; transcript_id "TCONS_00039771"; exon_number "3"; oId "CUFF.40321.4"; tss_id "TSS29942"; |
| chr17 | Cufflinks exon58203900 | 58204226 | . | - | . | gene_id "XLOC_023655"; transcript_id "TCONS_00039772"; exon_number "1"; oId "CUFF.40321.5"; tss_id "TSS29943"; |
| chr17 | Cufflinks exon58206317 | 58206451 | . | - | . | gene_id "XLOC_023655"; transcript_id "TCONS_00039772"; exon_number "2"; oId "CUFF.40321.5"; tss_id "TSS29943"; |
| chr17 | Cufflinks exon58209797 | 58212000 | . | - | . | gene_id "XLOC_023655"; transcript_id "TCONS_00039772"; exon_number "3"; oId "CUFF.40321.5"; tss_id "TSS29943"; |
| chr17 | Cufflinks exon58203900 | 58204226 | . | - | . | gene_id "XLOC_023655"; transcript_id "TCONS_00039774"; exon_number "1"; oId "CUFF.40321.7"; tss_id "TSS29941"; |
| chr17 | Cufflinks exon58209797 | 58209873 | . | - | . | gene_id "XLOC_023655"; transcript_id "TCONS_00039774"; exon_number                                             |

"2"; oId "CUFF.40321.7"; tss\_id "TSS29941";  
chr17 Cufflinks exon58212117 58213074 . - . gene\_id "XLOC\_023655"; transcript\_id "TCONS\_00039774"; exon\_number  
"3"; oId "CUFF.40321.7"; tss\_id "TSS29941";  
chr17 Cufflinks exon58203900 58204226 . - . gene\_id "XLOC\_023655"; transcript\_id "TCONS\_00039773"; exon\_number  
"1"; oId "CUFF.40321.6"; tss\_id "TSS29941";  
chr17 Cufflinks exon58212117 58213074 . - . gene\_id "XLOC\_023655"; transcript\_id "TCONS\_00039773"; exon\_number  
"2"; oId "CUFF.40321.6"; tss\_id "TSS29941";  
chr17 Cufflinks exon59547130 59553934 . - . gene\_id "XLOC\_023673"; transcript\_id "TCONS\_00039796"; exon\_number  
"1"; oId "CUFF.40358.1"; tss\_id "TSS29963";  
chr17 Cufflinks exon59554081 59554155 . - . gene\_id "XLOC\_023673"; transcript\_id "TCONS\_00039796"; exon\_number  
"2"; oId "CUFF.40358.1"; tss\_id "TSS29963";  
chr17 Cufflinks exon59554884 59554991 . - . gene\_id "XLOC\_023673"; transcript\_id "TCONS\_00039796"; exon\_number  
"3"; oId "CUFF.40358.1"; tss\_id "TSS29963";  
chr17 Cufflinks exon59587074 59587129 . - . gene\_id "XLOC\_023673"; transcript\_id "TCONS\_00039796"; exon\_number  
"4"; oId "CUFF.40358.1"; tss\_id "TSS29963";  
chr17 Cufflinks exon59589560 59590930 . - . gene\_id "XLOC\_023673"; transcript\_id "TCONS\_00039796"; exon\_number  
"5"; oId "CUFF.40358.1"; tss\_id "TSS29963";  
chr17 Cufflinks exon60214314 60214797 . - . gene\_id "XLOC\_023689"; transcript\_id "TCONS\_00039832"; exon\_number  
"1"; oId "CUFF.40403.2"; tss\_id "TSS29985";  
chr17 Cufflinks exon60401697 60401707 . - . gene\_id "XLOC\_023689"; transcript\_id "TCONS\_00039832"; exon\_number  
"2"; oId "CUFF.40403.2"; tss\_id "TSS29985";  
chr17 Cufflinks exon62582380 62582702 . - . gene\_id "XLOC\_023723"; transcript\_id "TCONS\_00039909"; exon\_number  
"1"; oId "CUFF.40521.1"; tss\_id "TSS30035";  
chr17 Cufflinks exon62677612 62677637 . - . gene\_id "XLOC\_023723"; transcript\_id "TCONS\_00039909"; exon\_number  
"2"; oId "CUFF.40521.1"; tss\_id "TSS30035";  
chr17 Cufflinks exon62951340 62952290 . - . gene\_id "XLOC\_023728"; transcript\_id "TCONS\_00039946"; exon\_number  
"1"; oId "CUFF.40530.11"; tss\_id "TSS30049";  
chr17 Cufflinks exon62953550 62953662 . - . gene\_id "XLOC\_023728"; transcript\_id "TCONS\_00039946"; exon\_number  
"2"; oId "CUFF.40530.11"; tss\_id "TSS30049";  
chr17 Cufflinks exon62961931 62962138 . - . gene\_id "XLOC\_023728"; transcript\_id "TCONS\_00039946"; exon\_number  
"3"; oId "CUFF.40530.11"; tss\_id "TSS30049";  
chr17 Cufflinks exon64297398 64297457 . - . gene\_id "XLOC\_023748"; transcript\_id "TCONS\_00039983"; exon\_number  
"1"; oId "CUFF.40594.2"; tss\_id "TSS30082";  
chr17 Cufflinks exon64297795 64298589 . - . gene\_id "XLOC\_023748"; transcript\_id "TCONS\_00039983"; exon\_number  
"2"; oId "CUFF.40594.2"; tss\_id "TSS30082";  
chr17 Cufflinks exon66092252 66092619 . - . gene\_id "XLOC\_023758"; transcript\_id "TCONS\_00040001"; exon\_number  
"1"; oId "CUFF.40640.1"; tss\_id "TSS30093";  
chr17 Cufflinks exon66093336 66093380 . - . gene\_id "XLOC\_023758"; transcript\_id "TCONS\_00040001"; exon\_number  
"2"; oId "CUFF.40640.1"; tss\_id "TSS30093";  
chr17 Cufflinks exon70399463 70400957 . - . gene\_id "XLOC\_023776"; transcript\_id "TCONS\_00040026"; exon\_number  
"1"; oId "CUFF.40764.2"; tss\_id "TSS30114";  
chr17 Cufflinks exon70424377 70424439 . - . gene\_id "XLOC\_023776"; transcript\_id "TCONS\_00040026"; exon\_number  
"2"; oId "CUFF.40764.2"; tss\_id "TSS30114";



|       |                        |          |   |   |   |                                                                                                                |
|-------|------------------------|----------|---|---|---|----------------------------------------------------------------------------------------------------------------|
| chr17 | Cufflinks exon70427269 | 70427365 | . | - | . | gene_id "XLOC_023776"; transcript_id "TCONS_00040026"; exon_number "3"; oId "CUFF.40764.2"; tss_id "TSS30114"; |
| chr17 | Cufflinks exon70588342 | 70588943 | . | - | . | gene_id "XLOC_023776"; transcript_id "TCONS_00040026"; exon_number "4"; oId "CUFF.40764.2"; tss_id "TSS30114"; |
| chr17 | Cufflinks exon70399463 | 70400957 | . | - | . | gene_id "XLOC_023776"; transcript_id "TCONS_00040025"; exon_number "1"; oId "CUFF.40764.1"; tss_id "TSS30114"; |
| chr17 | Cufflinks exon70416841 | 70417105 | . | - | . | gene_id "XLOC_023776"; transcript_id "TCONS_00040025"; exon_number "2"; oId "CUFF.40764.1"; tss_id "TSS30114"; |
| chr17 | Cufflinks exon70424377 | 70424439 | . | - | . | gene_id "XLOC_023776"; transcript_id "TCONS_00040025"; exon_number "3"; oId "CUFF.40764.1"; tss_id "TSS30114"; |
| chr17 | Cufflinks exon70588342 | 70588943 | . | - | . | gene_id "XLOC_023776"; transcript_id "TCONS_00040025"; exon_number "4"; oId "CUFF.40764.1"; tss_id "TSS30114"; |
| chr17 | Cufflinks exon70399463 | 70400957 | . | - | . | gene_id "XLOC_023776"; transcript_id "TCONS_00040028"; exon_number "1"; oId "CUFF.40764.4"; tss_id "TSS30114"; |
| chr17 | Cufflinks exon70424377 | 70424439 | . | - | . | gene_id "XLOC_023776"; transcript_id "TCONS_00040028"; exon_number "2"; oId "CUFF.40764.4"; tss_id "TSS30114"; |
| chr17 | Cufflinks exon70427267 | 70427365 | . | - | . | gene_id "XLOC_023776"; transcript_id "TCONS_00040028"; exon_number "3"; oId "CUFF.40764.4"; tss_id "TSS30114"; |
| chr17 | Cufflinks exon70588342 | 70588956 | . | - | . | gene_id "XLOC_023776"; transcript_id "TCONS_00040028"; exon_number "4"; oId "CUFF.40764.4"; tss_id "TSS30114"; |
| chr17 | Cufflinks exon70399463 | 70400957 | . | - | . | gene_id "XLOC_023776"; transcript_id "TCONS_00040027"; exon_number "1"; oId "CUFF.40764.3"; tss_id "TSS30114"; |
| chr17 | Cufflinks exon70424377 | 70424439 | . | - | . | gene_id "XLOC_023776"; transcript_id "TCONS_00040027"; exon_number "2"; oId "CUFF.40764.3"; tss_id "TSS30114"; |
| chr17 | Cufflinks exon70588342 | 70588956 | . | - | . | gene_id "XLOC_023776"; transcript_id "TCONS_00040027"; exon_number "3"; oId "CUFF.40764.3"; tss_id "TSS30114"; |
| chr17 | Cufflinks exon70582883 | 70582964 | . | - | . | gene_id "XLOC_023776"; transcript_id "TCONS_00040029"; exon_number "1"; oId "CUFF.40764.5"; tss_id "TSS30114"; |
| chr17 | Cufflinks exon70588342 | 70588956 | . | - | . | gene_id "XLOC_023776"; transcript_id "TCONS_00040029"; exon_number "2"; oId "CUFF.40764.5"; tss_id "TSS30114"; |
| chr17 | Cufflinks exon76103483 | 76103921 | . | - | . | gene_id "XLOC_023896"; transcript_id "TCONS_00040235"; exon_number "1"; oId "CUFF.41139.1"; tss_id "TSS30269"; |
| chr17 | Cufflinks exon76105132 | 76107880 | . | - | . | gene_id "XLOC_023896"; transcript_id "TCONS_00040235"; exon_number "2"; oId "CUFF.41139.1"; tss_id "TSS30269"; |
| chr17 | Cufflinks exon76257430 | 76257994 | . | - | . | gene_id "XLOC_023901"; transcript_id "TCONS_00040243"; exon_number "1"; oId "CUFF.41170.1"; tss_id "TSS30275"; |
| chr17 | Cufflinks exon76259328 | 76260303 | . | - | . | gene_id "XLOC_023901"; transcript_id "TCONS_00040243"; exon_number "2"; oId "CUFF.41170.1"; tss_id "TSS30275"; |
| chr17 | Cufflinks exon76262058 | 76262314 | . | - | . | gene_id "XLOC_023901"; transcript_id "TCONS_00040243"; exon_number "3"; oId "CUFF.41170.1"; tss_id "TSS30275"; |
| chr17 | Cufflinks exon76265851 | 76266026 | . | - | . | gene_id "XLOC_023901"; transcript_id "TCONS_00040243"; exon_number "4"; oId "CUFF.41170.1"; tss_id "TSS30275"; |
| chr17 | Cufflinks exon76266733 | 76266927 | . | - | . | gene_id "XLOC_023901"; transcript_id "TCONS_00040243"; exon_number                                             |

"5"; oId "CUFF.41170.1"; tss\_id "TSS30275";  
chr17 Cufflinks exon76267333 76268048 . - . gene\_id "XLOC\_023901"; transcript\_id "TCONS\_00040243"; exon\_number  
"6"; oId "CUFF.41170.1"; tss\_id "TSS30275";  
chr17 Cufflinks exon76274525 76274573 . - . gene\_id "XLOC\_023901"; transcript\_id "TCONS\_00040243"; exon\_number  
"7"; oId "CUFF.41170.1"; tss\_id "TSS30275";  
chr17 Cufflinks exon76259046 76260303 . - . gene\_id "XLOC\_023901"; transcript\_id "TCONS\_00040244"; exon\_number  
"1"; oId "CUFF.41170.2"; tss\_id "TSS30275";  
chr17 Cufflinks exon76262058 76262314 . - . gene\_id "XLOC\_023901"; transcript\_id "TCONS\_00040244"; exon\_number  
"2"; oId "CUFF.41170.2"; tss\_id "TSS30275";  
chr17 Cufflinks exon76265851 76266026 . - . gene\_id "XLOC\_023901"; transcript\_id "TCONS\_00040244"; exon\_number  
"3"; oId "CUFF.41170.2"; tss\_id "TSS30275";  
chr17 Cufflinks exon76266733 76266927 . - . gene\_id "XLOC\_023901"; transcript\_id "TCONS\_00040244"; exon\_number  
"4"; oId "CUFF.41170.2"; tss\_id "TSS30275";  
chr17 Cufflinks exon76267333 76270268 . - . gene\_id "XLOC\_023901"; transcript\_id "TCONS\_00040244"; exon\_number  
"5"; oId "CUFF.41170.2"; tss\_id "TSS30275";  
chr17 Cufflinks exon76274525 76274641 . - . gene\_id "XLOC\_023901"; transcript\_id "TCONS\_00040244"; exon\_number  
"6"; oId "CUFF.41170.2"; tss\_id "TSS30275";  
chr17 Cufflinks exon76261938 76262314 . - . gene\_id "XLOC\_023901"; transcript\_id "TCONS\_00040245"; exon\_number  
"1"; oId "CUFF.41170.3"; tss\_id "TSS30276";  
chr17 Cufflinks exon76265851 76266659 . - . gene\_id "XLOC\_023901"; transcript\_id "TCONS\_00040245"; exon\_number  
"2"; oId "CUFF.41170.3"; tss\_id "TSS30276";  
chr17 Cufflinks exon76613430 76613708 . - . gene\_id "XLOC\_023909"; transcript\_id "TCONS\_00040254"; exon\_number  
"1"; oId "CUFF.41187.7"; tss\_id "TSS30284";  
chr17 Cufflinks exon76620274 76620397 . - . gene\_id "XLOC\_023909"; transcript\_id "TCONS\_00040254"; exon\_number  
"2"; oId "CUFF.41187.7"; tss\_id "TSS30284";  
chr17 Cufflinks exon76626114 76626223 . - . gene\_id "XLOC\_023909"; transcript\_id "TCONS\_00040254"; exon\_number  
"3"; oId "CUFF.41187.7"; tss\_id "TSS30284";  
chr17 Cufflinks exon76626399 76626512 . - . gene\_id "XLOC\_023909"; transcript\_id "TCONS\_00040254"; exon\_number  
"4"; oId "CUFF.41187.7"; tss\_id "TSS30284";  
chr17 Cufflinks exon76628001 76628024 . - . gene\_id "XLOC\_023909"; transcript\_id "TCONS\_00040254"; exon\_number  
"5"; oId "CUFF.41187.7"; tss\_id "TSS30284";  
chr17 Cufflinks exon76613430 76615126 . - . gene\_id "XLOC\_023909"; transcript\_id "TCONS\_00040257"; exon\_number  
"1"; oId "CUFF.41187.6"; tss\_id "TSS30285";  
chr17 Cufflinks exon76620274 76620397 . - . gene\_id "XLOC\_023909"; transcript\_id "TCONS\_00040257"; exon\_number  
"2"; oId "CUFF.41187.6"; tss\_id "TSS30285";  
chr17 Cufflinks exon76624000 76624117 . - . gene\_id "XLOC\_023909"; transcript\_id "TCONS\_00040257"; exon\_number  
"3"; oId "CUFF.41187.6"; tss\_id "TSS30285";  
chr17 Cufflinks exon76626114 76626512 . - . gene\_id "XLOC\_023909"; transcript\_id "TCONS\_00040257"; exon\_number  
"4"; oId "CUFF.41187.6"; tss\_id "TSS30285";  
chr17 Cufflinks exon76628031 76628139 . - . gene\_id "XLOC\_023909"; transcript\_id "TCONS\_00040257"; exon\_number  
"5"; oId "CUFF.41187.6"; tss\_id "TSS30285";  
chr17 Cufflinks exon76613430 76615126 . - . gene\_id "XLOC\_023909"; transcript\_id "TCONS\_00040256"; exon\_number  
"1"; oId "CUFF.41187.5"; tss\_id "TSS30285";

|          |                        |             |          |   |   |   |                                                                    |
|----------|------------------------|-------------|----------|---|---|---|--------------------------------------------------------------------|
| chr17    | Cufflinks exon         | 76620274    | 76620397 | . | - | . | gene_id "XLOC_023909"; transcript_id "TCONS_00040256"; exon_number |
| "2"; oId | "CUFF.41187.5"; tss_id | "TSS30285"; |          |   |   |   |                                                                    |
| chr17    | Cufflinks exon         | 76624000    | 76624117 | . | - | . | gene_id "XLOC_023909"; transcript_id "TCONS_00040256"; exon_number |
| "3"; oId | "CUFF.41187.5"; tss_id | "TSS30285"; |          |   |   |   |                                                                    |
| chr17    | Cufflinks exon         | 76626114    | 76626362 | . | - | . | gene_id "XLOC_023909"; transcript_id "TCONS_00040256"; exon_number |
| "4"; oId | "CUFF.41187.5"; tss_id | "TSS30285"; |          |   |   |   |                                                                    |
| chr17    | Cufflinks exon         | 76628031    | 76628139 | . | - | . | gene_id "XLOC_023909"; transcript_id "TCONS_00040256"; exon_number |
| "5"; oId | "CUFF.41187.5"; tss_id | "TSS30285"; |          |   |   |   |                                                                    |
| chr17    | Cufflinks exon         | 76613430    | 76613708 | . | - | . | gene_id "XLOC_023909"; transcript_id "TCONS_00040255"; exon_number |
| "1"; oId | "CUFF.41187.4"; tss_id | "TSS30285"; |          |   |   |   |                                                                    |
| chr17    | Cufflinks exon         | 76620274    | 76620397 | . | - | . | gene_id "XLOC_023909"; transcript_id "TCONS_00040255"; exon_number |
| "2"; oId | "CUFF.41187.4"; tss_id | "TSS30285"; |          |   |   |   |                                                                    |
| chr17    | Cufflinks exon         | 76624000    | 76624117 | . | - | . | gene_id "XLOC_023909"; transcript_id "TCONS_00040255"; exon_number |
| "3"; oId | "CUFF.41187.4"; tss_id | "TSS30285"; |          |   |   |   |                                                                    |
| chr17    | Cufflinks exon         | 76626114    | 76626512 | . | - | . | gene_id "XLOC_023909"; transcript_id "TCONS_00040255"; exon_number |
| "4"; oId | "CUFF.41187.4"; tss_id | "TSS30285"; |          |   |   |   |                                                                    |
| chr17    | Cufflinks exon         | 76628072    | 76628139 | . | - | . | gene_id "XLOC_023909"; transcript_id "TCONS_00040255"; exon_number |
| "5"; oId | "CUFF.41187.4"; tss_id | "TSS30285"; |          |   |   |   |                                                                    |
| chr17    | Cufflinks exon         | 76613430    | 76613708 | . | - | . | gene_id "XLOC_023909"; transcript_id "TCONS_00040258"; exon_number |
| "1"; oId | "CUFF.41187.1"; tss_id | "TSS30285"; |          |   |   |   |                                                                    |
| chr17    | Cufflinks exon         | 76620274    | 76620397 | . | - | . | gene_id "XLOC_023909"; transcript_id "TCONS_00040258"; exon_number |
| "2"; oId | "CUFF.41187.1"; tss_id | "TSS30285"; |          |   |   |   |                                                                    |
| chr17    | Cufflinks exon         | 76624400    | 76624520 | . | - | . | gene_id "XLOC_023909"; transcript_id "TCONS_00040258"; exon_number |
| "3"; oId | "CUFF.41187.1"; tss_id | "TSS30285"; |          |   |   |   |                                                                    |
| chr17    | Cufflinks exon         | 76626114    | 76626512 | . | - | . | gene_id "XLOC_023909"; transcript_id "TCONS_00040258"; exon_number |
| "4"; oId | "CUFF.41187.1"; tss_id | "TSS30285"; |          |   |   |   |                                                                    |
| chr17    | Cufflinks exon         | 76628072    | 76628148 | . | - | . | gene_id "XLOC_023909"; transcript_id "TCONS_00040258"; exon_number |
| "5"; oId | "CUFF.41187.1"; tss_id | "TSS30285"; |          |   |   |   |                                                                    |
| chr17    | Cufflinks exon         | 76613430    | 76615126 | . | - | . | gene_id "XLOC_023909"; transcript_id "TCONS_00040260"; exon_number |
| "1"; oId | "CUFF.41187.3"; tss_id | "TSS30285"; |          |   |   |   |                                                                    |
| chr17    | Cufflinks exon         | 76620274    | 76620397 | . | - | . | gene_id "XLOC_023909"; transcript_id "TCONS_00040260"; exon_number |
| "2"; oId | "CUFF.41187.3"; tss_id | "TSS30285"; |          |   |   |   |                                                                    |
| chr17    | Cufflinks exon         | 76626114    | 76626512 | . | - | . | gene_id "XLOC_023909"; transcript_id "TCONS_00040260"; exon_number |
| "3"; oId | "CUFF.41187.3"; tss_id | "TSS30285"; |          |   |   |   |                                                                    |
| chr17    | Cufflinks exon         | 76628072    | 76628196 | . | - | . | gene_id "XLOC_023909"; transcript_id "TCONS_00040260"; exon_number |
| "4"; oId | "CUFF.41187.3"; tss_id | "TSS30285"; |          |   |   |   |                                                                    |
| chr17    | Cufflinks exon         | 76613430    | 76613708 | . | - | . | gene_id "XLOC_023909"; transcript_id "TCONS_00040259"; exon_number |
| "1"; oId | "CUFF.41187.2"; tss_id | "TSS30285"; |          |   |   |   |                                                                    |
| chr17    | Cufflinks exon         | 76620274    | 76620397 | . | - | . | gene_id "XLOC_023909"; transcript_id "TCONS_00040259"; exon_number |
| "2"; oId | "CUFF.41187.2"; tss_id | "TSS30285"; |          |   |   |   |                                                                    |
| chr17    | Cufflinks exon         | 76626114    | 76626362 | . | - | . | gene_id "XLOC_023909"; transcript_id "TCONS_00040259"; exon_number |
| "3"; oId | "CUFF.41187.2"; tss_id | "TSS30285"; |          |   |   |   |                                                                    |
| chr17    | Cufflinks exon         | 76628031    | 76628196 | . | - | . | gene_id "XLOC_023909"; transcript_id "TCONS_00040259"; exon_number |

"4"; oId "CUFF.41187.2"; tss\_id "TSS30285";  
chr17 Cufflinks exon76613430 76615126 . - . gene\_id "XLOC\_023909"; transcript\_id "TCONS\_00040261"; exon\_number  
"1"; oId "CUFF.41187.10"; tss\_id "TSS30285";  
chr17 Cufflinks exon76620274 76620397 . - . gene\_id "XLOC\_023909"; transcript\_id "TCONS\_00040261"; exon\_number  
"2"; oId "CUFF.41187.10"; tss\_id "TSS30285";  
chr17 Cufflinks exon76624400 76624520 . - . gene\_id "XLOC\_023909"; transcript\_id "TCONS\_00040261"; exon\_number  
"3"; oId "CUFF.41187.10"; tss\_id "TSS30285";  
chr17 Cufflinks exon76626114 76626512 . - . gene\_id "XLOC\_023909"; transcript\_id "TCONS\_00040261"; exon\_number  
"4"; oId "CUFF.41187.10"; tss\_id "TSS30285";  
chr17 Cufflinks exon76628072 76628204 . - . gene\_id "XLOC\_023909"; transcript\_id "TCONS\_00040261"; exon\_number  
"5"; oId "CUFF.41187.10"; tss\_id "TSS30285";  
chr17 Cufflinks exon76613430 76615126 . - . gene\_id "XLOC\_023909"; transcript\_id "TCONS\_00040263"; exon\_number  
"1"; oId "CUFF.41187.9"; tss\_id "TSS30285";  
chr17 Cufflinks exon76620274 76620397 . - . gene\_id "XLOC\_023909"; transcript\_id "TCONS\_00040263"; exon\_number  
"2"; oId "CUFF.41187.9"; tss\_id "TSS30285";  
chr17 Cufflinks exon76626114 76626362 . - . gene\_id "XLOC\_023909"; transcript\_id "TCONS\_00040263"; exon\_number  
"3"; oId "CUFF.41187.9"; tss\_id "TSS30285";  
chr17 Cufflinks exon76628031 76628249 . - . gene\_id "XLOC\_023909"; transcript\_id "TCONS\_00040263"; exon\_number  
"4"; oId "CUFF.41187.9"; tss\_id "TSS30285";  
chr17 Cufflinks exon76613430 76615126 . - . gene\_id "XLOC\_023909"; transcript\_id "TCONS\_00040262"; exon\_number  
"1"; oId "CUFF.41187.8"; tss\_id "TSS30285";  
chr17 Cufflinks exon76620274 76620397 . - . gene\_id "XLOC\_023909"; transcript\_id "TCONS\_00040262"; exon\_number  
"2"; oId "CUFF.41187.8"; tss\_id "TSS30285";  
chr17 Cufflinks exon76624000 76624117 . - . gene\_id "XLOC\_023909"; transcript\_id "TCONS\_00040262"; exon\_number  
"3"; oId "CUFF.41187.8"; tss\_id "TSS30285";  
chr17 Cufflinks exon76626114 76626512 . - . gene\_id "XLOC\_023909"; transcript\_id "TCONS\_00040262"; exon\_number  
"4"; oId "CUFF.41187.8"; tss\_id "TSS30285";  
chr17 Cufflinks exon76628072 76628249 . - . gene\_id "XLOC\_023909"; transcript\_id "TCONS\_00040262"; exon\_number  
"5"; oId "CUFF.41187.8"; tss\_id "TSS30285";  
chr17 Cufflinks exon76617803 76617815 . - . gene\_id "XLOC\_023909"; transcript\_id "TCONS\_00040266"; exon\_number  
"1"; oId "CUFF.41187.11"; tss\_id "TSS30285";  
chr17 Cufflinks exon76620274 76620397 . - . gene\_id "XLOC\_023909"; transcript\_id "TCONS\_00040266"; exon\_number  
"2"; oId "CUFF.41187.11"; tss\_id "TSS30285";  
chr17 Cufflinks exon76626114 76626512 . - . gene\_id "XLOC\_023909"; transcript\_id "TCONS\_00040266"; exon\_number  
"3"; oId "CUFF.41187.11"; tss\_id "TSS30285";  
chr17 Cufflinks exon76628072 76628204 . - . gene\_id "XLOC\_023909"; transcript\_id "TCONS\_00040266"; exon\_number  
"4"; oId "CUFF.41187.11"; tss\_id "TSS30285";  
chr17 Cufflinks exon77771603 77775490 . - . gene\_id "XLOC\_023936"; transcript\_id "TCONS\_00040311"; exon\_number  
"1"; oId "CUFF.41248.1"; tss\_id "TSS30319";  
chr17 Cufflinks exon77775737 77778350 . - . gene\_id "XLOC\_023936"; transcript\_id "TCONS\_00040311"; exon\_number  
"2"; oId "CUFF.41248.1"; tss\_id "TSS30319";  
chr17 Cufflinks exon77889051 77889212 . - . gene\_id "XLOC\_023939"; transcript\_id "TCONS\_00040315"; exon\_number  
"1"; oId "CUFF.41253.2"; tss\_id "TSS30323";

|       |                                             |          |   |   |   |                                                                             |
|-------|---------------------------------------------|----------|---|---|---|-----------------------------------------------------------------------------|
| chr17 | Cufflinks exon77889986                      | 77890738 | . | - | . | gene_id "XLOC_023939"; transcript_id "TCONS_00040315"; exon_number          |
|       | "2"; oId "CUFF.41253.2"; tss_id "TSS30323"; |          |   |   |   |                                                                             |
| chr17 | Cufflinks exon77890928                      | 77893635 | . | - | . | gene_id "XLOC_023939"; transcript_id "TCONS_00040315"; exon_number          |
|       | "3"; oId "CUFF.41253.2"; tss_id "TSS30323"; |          |   |   |   |                                                                             |
| chr17 | Cufflinks exon77895203                      | 77895425 | . | - | . | gene_id "XLOC_023939"; transcript_id "TCONS_00040315"; exon_number          |
|       | "4"; oId "CUFF.41253.2"; tss_id "TSS30323"; |          |   |   |   |                                                                             |
| chr17 | Cufflinks exon77895749                      | 77895901 | . | - | . | gene_id "XLOC_023939"; transcript_id "TCONS_00040315"; exon_number          |
|       | "5"; oId "CUFF.41253.2"; tss_id "TSS30323"; |          |   |   |   |                                                                             |
| chr17 | Cufflinks exon77898813                      | 77898870 | . | - | . | gene_id "XLOC_023939"; transcript_id "TCONS_00040315"; exon_number          |
|       | "6"; oId "CUFF.41253.2"; tss_id "TSS30323"; |          |   |   |   |                                                                             |
| chr17 | Cufflinks exon77899500                      | 77901326 | . | - | . | gene_id "XLOC_023939"; transcript_id "TCONS_00040315"; exon_number          |
|       | "7"; oId "CUFF.41253.2"; tss_id "TSS30323"; |          |   |   |   |                                                                             |
| chr17 | Cufflinks exon78422046                      | 78427330 | . | - | . | gene_id "XLOC_023947"; transcript_id "TCONS_00040332"; exon_number          |
|       | "1"; oId "CUFF.41286.2"; tss_id "TSS30335"; |          |   |   |   |                                                                             |
| chr17 | Cufflinks exon78427556                      | 78428618 | . | - | . | gene_id "XLOC_023947"; transcript_id "TCONS_00040332"; exon_number          |
|       | "2"; oId "CUFF.41286.2"; tss_id "TSS30335"; |          |   |   |   |                                                                             |
| chr17 | Cufflinks exon80338629                      | 80339218 | . | - | . | gene_id "XLOC_024025"; transcript_id "TCONS_00040450"; exon_number          |
|       | "1"; oId "CUFF.41485.3"; tss_id "TSS30429"; |          |   |   |   |                                                                             |
| chr17 | Cufflinks exon80340790                      | 80341047 | . | - | . | gene_id "XLOC_024025"; transcript_id "TCONS_00040450"; exon_number          |
|       | "2"; oId "CUFF.41485.3"; tss_id "TSS30429"; |          |   |   |   |                                                                             |
| chr17 | Cufflinks exon80341395                      | 80345506 | . | - | . | gene_id "XLOC_024025"; transcript_id "TCONS_00040450"; exon_number          |
|       | "3"; oId "CUFF.41485.3"; tss_id "TSS30429"; |          |   |   |   |                                                                             |
| chr17 | Cufflinks exon80346215                      | 80346565 | . | - | . | gene_id "XLOC_024025"; transcript_id "TCONS_00040450"; exon_number          |
|       | "4"; oId "CUFF.41485.3"; tss_id "TSS30429"; |          |   |   |   |                                                                             |
| chr17 | Cufflinks exon80338629                      | 80339218 | . | - | . | gene_id "XLOC_024025"; transcript_id "TCONS_00040449"; exon_number          |
|       | "1"; oId "CUFF.41485.1"; tss_id "TSS30429"; |          |   |   |   |                                                                             |
| chr17 | Cufflinks exon80340796                      | 80341047 | . | - | . | gene_id "XLOC_024025"; transcript_id "TCONS_00040449"; exon_number          |
|       | "2"; oId "CUFF.41485.1"; tss_id "TSS30429"; |          |   |   |   |                                                                             |
| chr17 | Cufflinks exon80341395                      | 80345506 | . | - | . | gene_id "XLOC_024025"; transcript_id "TCONS_00040449"; exon_number          |
|       | "3"; oId "CUFF.41485.1"; tss_id "TSS30429"; |          |   |   |   |                                                                             |
| chr17 | Cufflinks exon80346215                      | 80346565 | . | - | . | gene_id "XLOC_024025"; transcript_id "TCONS_00040449"; exon_number          |
|       | "4"; oId "CUFF.41485.1"; tss_id "TSS30429"; |          |   |   |   |                                                                             |
| chr17 | Cufflinks exon80340434                      | 80341047 | . | - | . | gene_id "XLOC_024025"; transcript_id "TCONS_00040451"; exon_number          |
|       | "1"; oId "CUFF.41485.4"; tss_id "TSS30429"; |          |   |   |   |                                                                             |
| chr17 | Cufflinks exon80341395                      | 80345506 | . | - | . | gene_id "XLOC_024025"; transcript_id "TCONS_00040451"; exon_number          |
|       | "2"; oId "CUFF.41485.4"; tss_id "TSS30429"; |          |   |   |   |                                                                             |
| chr17 | Cufflinks exon80346215                      | 80346565 | . | - | . | gene_id "XLOC_024025"; transcript_id "TCONS_00040451"; exon_number          |
|       | "3"; oId "CUFF.41485.4"; tss_id "TSS30429"; |          |   |   |   |                                                                             |
| chr18 | Cufflinks exon5237704                       | 5240276  | . | + | . | gene_id "XLOC_024084"; transcript_id "TCONS_00040541"; exon_number "1"; oId |
|       | "CUFF.41673.1"; tss_id "TSS30501";          |          |   |   |   |                                                                             |
| chr18 | Cufflinks exon5240647                       | 5241888  | . | + | . | gene_id "XLOC_024084"; transcript_id "TCONS_00040541"; exon_number "2"; oId |
|       | "CUFF.41673.1"; tss_id "TSS30501";          |          |   |   |   |                                                                             |
| chr18 | Cufflinks exon5243593                       | 5246505  | . | + | . | gene_id "XLOC_024084"; transcript_id "TCONS_00040541"; exon_number "3"; oId |

"CUFF.41673.1"; tss\_id "TSS30501";  
chr18 Cufflinks exon5237819 5239195 . + . gene\_id "XLOC\_024084"; transcript\_id "TCONS\_00040544"; exon\_number "1"; oId  
"CUFF.41673.4"; tss\_id "TSS30502";  
chr18 Cufflinks exon5241698 5241811 . + . gene\_id "XLOC\_024084"; transcript\_id "TCONS\_00040544"; exon\_number "2"; oId  
"CUFF.41673.4"; tss\_id "TSS30502";  
chr18 Cufflinks exon5243593 5246505 . + . gene\_id "XLOC\_024084"; transcript\_id "TCONS\_00040544"; exon\_number "3"; oId  
"CUFF.41673.4"; tss\_id "TSS30502";  
chr18 Cufflinks exon5237819 5239048 . + . gene\_id "XLOC\_024084"; transcript\_id "TCONS\_00040543"; exon\_number "1"; oId  
"CUFF.41673.3"; tss\_id "TSS30502";  
chr18 Cufflinks exon5240647 5241888 . + . gene\_id "XLOC\_024084"; transcript\_id "TCONS\_00040543"; exon\_number "2"; oId  
"CUFF.41673.3"; tss\_id "TSS30502";  
chr18 Cufflinks exon5243593 5246505 . + . gene\_id "XLOC\_024084"; transcript\_id "TCONS\_00040543"; exon\_number "3"; oId  
"CUFF.41673.3"; tss\_id "TSS30502";  
chr18 Cufflinks exon5237819 5241030 . + . gene\_id "XLOC\_024084"; transcript\_id "TCONS\_00040542"; exon\_number "1"; oId  
"CUFF.41673.2"; tss\_id "TSS30502";  
chr18 Cufflinks exon5241698 5241888 . + . gene\_id "XLOC\_024084"; transcript\_id "TCONS\_00040542"; exon\_number "2"; oId  
"CUFF.41673.2"; tss\_id "TSS30502";  
chr18 Cufflinks exon5243593 5246505 . + . gene\_id "XLOC\_024084"; transcript\_id "TCONS\_00040542"; exon\_number "3"; oId  
"CUFF.41673.2"; tss\_id "TSS30502";  
chr18 Cufflinks exon5237846 5239048 . + . gene\_id "XLOC\_024084"; transcript\_id "TCONS\_00040546"; exon\_number "1"; oId  
"CUFF.41673.6"; tss\_id "TSS30502";  
chr18 Cufflinks exon5241698 5241811 . + . gene\_id "XLOC\_024084"; transcript\_id "TCONS\_00040546"; exon\_number "2"; oId  
"CUFF.41673.6"; tss\_id "TSS30502";  
chr18 Cufflinks exon5243593 5246505 . + . gene\_id "XLOC\_024084"; transcript\_id "TCONS\_00040546"; exon\_number "3"; oId  
"CUFF.41673.6"; tss\_id "TSS30502";  
chr18 Cufflinks exon5237846 5241888 . + . gene\_id "XLOC\_024084"; transcript\_id "TCONS\_00040545"; exon\_number "1"; oId  
"CUFF.41673.5"; tss\_id "TSS30502";  
chr18 Cufflinks exon5243593 5246505 . + . gene\_id "XLOC\_024084"; transcript\_id "TCONS\_00040545"; exon\_number "2"; oId  
"CUFF.41673.5"; tss\_id "TSS30502";  
chr18 Cufflinks exon8948944 8948983 . + . gene\_id "XLOC\_024108"; transcript\_id "TCONS\_00040586"; exon\_number "1"; oId  
"CUFF.41727.1"; tss\_id "TSS30535";  
chr18 Cufflinks exon8950903 8951025 . + . gene\_id "XLOC\_024108"; transcript\_id "TCONS\_00040586"; exon\_number "2"; oId  
"CUFF.41727.1"; tss\_id "TSS30535";  
chr18 Cufflinks exon8952793 8954788 . + . gene\_id "XLOC\_024108"; transcript\_id "TCONS\_00040586"; exon\_number "3"; oId  
"CUFF.41727.1"; tss\_id "TSS30535";  
chr18 Cufflinks exon8949294 8949379 . + . gene\_id "XLOC\_024108"; transcript\_id "TCONS\_00040588"; exon\_number "1"; oId  
"CUFF.41727.3"; tss\_id "TSS30536";  
chr18 Cufflinks exon8950470 8950587 . + . gene\_id "XLOC\_024108"; transcript\_id "TCONS\_00040588"; exon\_number "2"; oId  
"CUFF.41727.3"; tss\_id "TSS30536";  
chr18 Cufflinks exon8950903 8951025 . + . gene\_id "XLOC\_024108"; transcript\_id "TCONS\_00040588"; exon\_number "3"; oId  
"CUFF.41727.3"; tss\_id "TSS30536";  
chr18 Cufflinks exon8952793 8954788 . + . gene\_id "XLOC\_024108"; transcript\_id "TCONS\_00040588"; exon\_number "4"; oId  
"CUFF.41727.3"; tss\_id "TSS30536";

|       |                        |          |   |   |   |                                                                                                                |
|-------|------------------------|----------|---|---|---|----------------------------------------------------------------------------------------------------------------|
| chr18 | Cufflinks exon8949294  | 8949379  | . | + | . | gene_id "XLOC_024108"; transcript_id "TCONS_00040587"; exon_number "1"; oId "CUFF.41727.2"; tss_id "TSS30536"; |
| chr18 | Cufflinks exon8950470  | 8950587  | . | + | . | gene_id "XLOC_024108"; transcript_id "TCONS_00040587"; exon_number "2"; oId "CUFF.41727.2"; tss_id "TSS30536"; |
| chr18 | Cufflinks exon8950903  | 8954788  | . | + | . | gene_id "XLOC_024108"; transcript_id "TCONS_00040587"; exon_number "3"; oId "CUFF.41727.2"; tss_id "TSS30536"; |
| chr18 | Cufflinks exon8949337  | 8949379  | . | + | . | gene_id "XLOC_024108"; transcript_id "TCONS_00040589"; exon_number "1"; oId "CUFF.41727.4"; tss_id "TSS30536"; |
| chr18 | Cufflinks exon8950903  | 8951025  | . | + | . | gene_id "XLOC_024108"; transcript_id "TCONS_00040589"; exon_number "2"; oId "CUFF.41727.4"; tss_id "TSS30536"; |
| chr18 | Cufflinks exon8952793  | 8954788  | . | + | . | gene_id "XLOC_024108"; transcript_id "TCONS_00040589"; exon_number "3"; oId "CUFF.41727.4"; tss_id "TSS30536"; |
| chr18 | Cufflinks exon8949343  | 8949379  | . | + | . | gene_id "XLOC_024108"; transcript_id "TCONS_00040590"; exon_number "1"; oId "CUFF.41727.5"; tss_id "TSS30536"; |
| chr18 | Cufflinks exon8950903  | 8951025  | . | + | . | gene_id "XLOC_024108"; transcript_id "TCONS_00040590"; exon_number "2"; oId "CUFF.41727.5"; tss_id "TSS30536"; |
| chr18 | Cufflinks exon8953171  | 8954788  | . | + | . | gene_id "XLOC_024108"; transcript_id "TCONS_00040590"; exon_number "3"; oId "CUFF.41727.5"; tss_id "TSS30536"; |
| chr18 | Cufflinks exon9404745  | 9404794  | . | + | . | gene_id "XLOC_024115"; transcript_id "TCONS_00040601"; exon_number "1"; oId "CUFF.41739.1"; tss_id "TSS30543"; |
| chr18 | Cufflinks exon9406032  | 9406170  | . | + | . | gene_id "XLOC_024115"; transcript_id "TCONS_00040601"; exon_number "2"; oId "CUFF.41739.1"; tss_id "TSS30543"; |
| chr18 | Cufflinks exon9407463  | 9407969  | . | + | . | gene_id "XLOC_024115"; transcript_id "TCONS_00040601"; exon_number "3"; oId "CUFF.41739.1"; tss_id "TSS30543"; |
| chr18 | Cufflinks exon9404745  | 9404794  | . | + | . | gene_id "XLOC_024115"; transcript_id "TCONS_00040602"; exon_number "1"; oId "CUFF.41739.2"; tss_id "TSS30543"; |
| chr18 | Cufflinks exon9406032  | 9406170  | . | + | . | gene_id "XLOC_024115"; transcript_id "TCONS_00040602"; exon_number "2"; oId "CUFF.41739.2"; tss_id "TSS30543"; |
| chr18 | Cufflinks exon9420819  | 9421083  | . | + | . | gene_id "XLOC_024115"; transcript_id "TCONS_00040602"; exon_number "3"; oId "CUFF.41739.2"; tss_id "TSS30543"; |
| chr18 | Cufflinks exon26454150 | 26454757 | . | + | . | gene_id "XLOC_024250"; transcript_id "TCONS_00040819"; exon_number "1"; oId "CUFF.42257.1"; tss_id "TSS30711"; |
| chr18 | Cufflinks exon26499114 | 26499207 | . | + | . | gene_id "XLOC_024250"; transcript_id "TCONS_00040819"; exon_number "2"; oId "CUFF.42257.1"; tss_id "TSS30711"; |
| chr18 | Cufflinks exon26596077 | 26596129 | . | + | . | gene_id "XLOC_024250"; transcript_id "TCONS_00040819"; exon_number "3"; oId "CUFF.42257.1"; tss_id "TSS30711"; |
| chr18 | Cufflinks exon26665300 | 26665408 | . | + | . | gene_id "XLOC_024250"; transcript_id "TCONS_00040819"; exon_number "4"; oId "CUFF.42257.1"; tss_id "TSS30711"; |
| chr18 | Cufflinks exon26751927 | 26752022 | . | + | . | gene_id "XLOC_024250"; transcript_id "TCONS_00040819"; exon_number "5"; oId "CUFF.42257.1"; tss_id "TSS30711"; |
| chr18 | Cufflinks exon26752708 | 26752943 | . | + | . | gene_id "XLOC_024250"; transcript_id "TCONS_00040819"; exon_number "6"; oId "CUFF.42257.1"; tss_id "TSS30711"; |
| chr18 | Cufflinks exon26454150 | 26454757 | . | + | . | gene_id "XLOC_024250"; transcript_id "TCONS_00040821"; exon_number                                             |





|       |           |      |          |          |   |   |   |                                                                                                                |
|-------|-----------|------|----------|----------|---|---|---|----------------------------------------------------------------------------------------------------------------|
| chr18 | Cufflinks | exon | 68132141 | 68132275 | . | + | . | gene_id "XLOC_024510"; transcript_id "TCONS_00041210"; exon_number "1"; oId "CUFF.43228.3"; tss_id "TSS31018"; |
| chr18 | Cufflinks | exon | 68157291 | 68158028 | . | + | . | gene_id "XLOC_024510"; transcript_id "TCONS_00041210"; exon_number "2"; oId "CUFF.43228.3"; tss_id "TSS31018"; |
| chr18 | Cufflinks | exon | 68132141 | 68132275 | . | + | . | gene_id "XLOC_024510"; transcript_id "TCONS_00041211"; exon_number "1"; oId "CUFF.43228.1"; tss_id "TSS31018"; |
| chr18 | Cufflinks | exon | 68157291 | 68157476 | . | + | . | gene_id "XLOC_024510"; transcript_id "TCONS_00041211"; exon_number "2"; oId "CUFF.43228.1"; tss_id "TSS31018"; |
| chr18 | Cufflinks | exon | 68198932 | 68199023 | . | + | . | gene_id "XLOC_024510"; transcript_id "TCONS_00041211"; exon_number "3"; oId "CUFF.43228.1"; tss_id "TSS31018"; |
| chr18 | Cufflinks | exon | 68399574 | 68399828 | . | + | . | gene_id "XLOC_024510"; transcript_id "TCONS_00041211"; exon_number "4"; oId "CUFF.43228.1"; tss_id "TSS31018"; |
| chr18 | Cufflinks | exon | 68132141 | 68132275 | . | + | . | gene_id "XLOC_024510"; transcript_id "TCONS_00041212"; exon_number "1"; oId "CUFF.43228.2"; tss_id "TSS31018"; |
| chr18 | Cufflinks | exon | 68157291 | 68157476 | . | + | . | gene_id "XLOC_024510"; transcript_id "TCONS_00041212"; exon_number "2"; oId "CUFF.43228.2"; tss_id "TSS31018"; |
| chr18 | Cufflinks | exon | 68198932 | 68199023 | . | + | . | gene_id "XLOC_024510"; transcript_id "TCONS_00041212"; exon_number "3"; oId "CUFF.43228.2"; tss_id "TSS31018"; |
| chr18 | Cufflinks | exon | 68423437 | 68423681 | . | + | . | gene_id "XLOC_024510"; transcript_id "TCONS_00041212"; exon_number "4"; oId "CUFF.43228.2"; tss_id "TSS31018"; |
| chr18 | Cufflinks | exon | 68437195 | 68437294 | . | + | . | gene_id "XLOC_024510"; transcript_id "TCONS_00041212"; exon_number "5"; oId "CUFF.43228.2"; tss_id "TSS31018"; |
| chr18 | Cufflinks | exon | 68157281 | 68157476 | . | + | . | gene_id "XLOC_024510"; transcript_id "TCONS_00041213"; exon_number "1"; oId "CUFF.43228.4"; tss_id "TSS31019"; |
| chr18 | Cufflinks | exon | 68193301 | 68193494 | . | + | . | gene_id "XLOC_024510"; transcript_id "TCONS_00041213"; exon_number "2"; oId "CUFF.43228.4"; tss_id "TSS31019"; |
| chr18 | Cufflinks | exon | 68198932 | 68199023 | . | + | . | gene_id "XLOC_024510"; transcript_id "TCONS_00041213"; exon_number "3"; oId "CUFF.43228.4"; tss_id "TSS31019"; |
| chr18 | Cufflinks | exon | 68423437 | 68423960 | . | + | . | gene_id "XLOC_024510"; transcript_id "TCONS_00041213"; exon_number "4"; oId "CUFF.43228.4"; tss_id "TSS31019"; |
| chr18 | Cufflinks | exon | 70535623 | 70535697 | . | + | . | gene_id "XLOC_024522"; transcript_id "TCONS_00041225"; exon_number "1"; oId "CUFF.43260.1"; tss_id "TSS31031"; |
| chr18 | Cufflinks | exon | 70548425 | 70548634 | . | + | . | gene_id "XLOC_024522"; transcript_id "TCONS_00041225"; exon_number "2"; oId "CUFF.43260.1"; tss_id "TSS31031"; |
| chr18 | Cufflinks | exon | 70536275 | 70536375 | . | + | . | gene_id "XLOC_024522"; transcript_id "TCONS_00041226"; exon_number "1"; oId "CUFF.43260.2"; tss_id "TSS31032"; |
| chr18 | Cufflinks | exon | 70547322 | 70547469 | . | + | . | gene_id "XLOC_024522"; transcript_id "TCONS_00041226"; exon_number "2"; oId "CUFF.43260.2"; tss_id "TSS31032"; |
| chr18 | Cufflinks | exon | 70548425 | 70548634 | . | + | . | gene_id "XLOC_024522"; transcript_id "TCONS_00041226"; exon_number "3"; oId "CUFF.43260.2"; tss_id "TSS31032"; |
| chr18 | Cufflinks | exon | 76525595 | 76525845 | . | + | . | gene_id "XLOC_024570"; transcript_id "TCONS_00041295"; exon_number "1"; oId "CUFF.43385.1"; tss_id "TSS31091"; |
| chr18 | Cufflinks | exon | 76526997 | 76531230 | . | + | . | gene_id "XLOC_024570"; transcript_id "TCONS_00041295"; exon_number "2"; oId "CUFF.43385.1"; tss_id "TSS31091"; |

exon\_number "2"; oId "CUFF.43385.1"; tss\_id "TSS31091";  
 chr18 Cufflinks exon 76534764 76535302 . + . gene\_id "XLOC\_024570"; transcript\_id "TCONS\_00041295";  
 exon\_number "3"; oId "CUFF.43385.1"; tss\_id "TSS31091";  
 chr18 Cufflinks exon76537384 76537537 . + . gene\_id "XLOC\_024571"; transcript\_id "TCONS\_00041296"; exon\_number  
 "1"; oId "CUFF.43386.1"; tss\_id "TSS31092";  
 chr18 Cufflinks exon76537722 76538506 . + . gene\_id "XLOC\_024571"; transcript\_id "TCONS\_00041296"; exon\_number  
 "2"; oId "CUFF.43386.1"; tss\_id "TSS31092";  
 chr18 Cufflinks exon77848230 77848266 . + . gene\_id "XLOC\_024595"; transcript\_id "TCONS\_00041347"; exon\_number  
 "1"; oId "CUFF.43469.11"; tss\_id "TSS31120";  
 chr18 Cufflinks exon77853168 77854583 . + . gene\_id "XLOC\_024595"; transcript\_id "TCONS\_00041347"; exon\_number  
 "2"; oId "CUFF.43469.11"; tss\_id "TSS31120";  
 chr18 Cufflinks exon77899372 77906137 . + . gene\_id "XLOC\_024604"; transcript\_id "TCONS\_00041351"; exon\_number  
 "1"; oId "CUFF.43489.1"; tss\_id "TSS31131";  
 chr18 Cufflinks exon77906305 77916591 . + . gene\_id "XLOC\_024604"; transcript\_id "TCONS\_00041351"; exon\_number  
 "2"; oId "CUFF.43489.1"; tss\_id "TSS31131";  
 chr18 Cufflinks exon77899372 77906137 . + . gene\_id "XLOC\_024604"; transcript\_id "TCONS\_00041352"; exon\_number  
 "1"; oId "CUFF.43489.2"; tss\_id "TSS31131";  
 chr18 Cufflinks exon77933763 77933818 . + . gene\_id "XLOC\_024604"; transcript\_id "TCONS\_00041352"; exon\_number  
 "2"; oId "CUFF.43489.2"; tss\_id "TSS31131";  
 chr18 Cufflinks exon77935969 77936484 . + . gene\_id "XLOC\_024604"; transcript\_id "TCONS\_00041352"; exon\_number  
 "3"; oId "CUFF.43489.2"; tss\_id "TSS31131";  
 chr18 Cufflinks exon77936935 77942339 . + . gene\_id "XLOC\_024604"; transcript\_id "TCONS\_00041352"; exon\_number  
 "4"; oId "CUFF.43489.2"; tss\_id "TSS31131";  
 chr18 Cufflinks exon77905807 77906137 . + . gene\_id "XLOC\_024604"; transcript\_id "TCONS\_00041353"; exon\_number  
 "1"; oId "CUFF.43489.3"; tss\_id "TSS31132";  
 chr18 Cufflinks exon77920399 77920486 . + . gene\_id "XLOC\_024604"; transcript\_id "TCONS\_00041353"; exon\_number  
 "2"; oId "CUFF.43489.3"; tss\_id "TSS31132";  
 chr18 Cufflinks exon77926702 77929616 . + . gene\_id "XLOC\_024604"; transcript\_id "TCONS\_00041353"; exon\_number  
 "3"; oId "CUFF.43489.3"; tss\_id "TSS31132";  
 chr18 Cufflinks exon77906516 77906530 . + . gene\_id "XLOC\_024604"; transcript\_id "TCONS\_00041354"; exon\_number  
 "1"; oId "CUFF.43489.4"; tss\_id "TSS31133";  
 chr18 Cufflinks exon77906844 77916591 . + . gene\_id "XLOC\_024604"; transcript\_id "TCONS\_00041354"; exon\_number  
 "2"; oId "CUFF.43489.4"; tss\_id "TSS31133";  
 chr18 Cufflinks exon8695854 8696119 . - . gene\_id "XLOC\_024658"; transcript\_id "TCONS\_00041433"; exon\_number "1"; oId  
 "CUFF.41714.1"; tss\_id "TSS31203";  
 chr18 Cufflinks exon8707068 8707619 . - . gene\_id "XLOC\_024658"; transcript\_id "TCONS\_00041433"; exon\_number "2"; oId  
 "CUFF.41714.1"; tss\_id "TSS31203";  
 chr18 Cufflinks exon9121263 9121454 . - . gene\_id "XLOC\_024660"; transcript\_id "TCONS\_00041436"; exon\_number "1"; oId  
 "CUFF.41732.2"; tss\_id "TSS31205";  
 chr18 Cufflinks exon9132221 9132396 . - . gene\_id "XLOC\_024660"; transcript\_id "TCONS\_00041436"; exon\_number "2"; oId  
 "CUFF.41732.2"; tss\_id "TSS31205";  
 chr18 Cufflinks exon9133389 9133508 . - . gene\_id "XLOC\_024660"; transcript\_id "TCONS\_00041436"; exon\_number "3"; oId  
 "CUFF.41732.2"; tss\_id "TSS31205";

chr18 Cufflinks exon9136362 9136718 . - . gene\_id "XLOC\_024660"; transcript\_id "TCONS\_00041436"; exon\_number "4"; oId "CUFF.41732.2"; tss\_id "TSS31205";

chr18 Cufflinks exon9121263 9121454 . - . gene\_id "XLOC\_024660"; transcript\_id "TCONS\_00041435"; exon\_number "1"; oId "CUFF.41732.1"; tss\_id "TSS31205";

chr18 Cufflinks exon9133389 9133508 . - . gene\_id "XLOC\_024660"; transcript\_id "TCONS\_00041435"; exon\_number "2"; oId "CUFF.41732.1"; tss\_id "TSS31205";

chr18 Cufflinks exon9136362 9136718 . - . gene\_id "XLOC\_024660"; transcript\_id "TCONS\_00041435"; exon\_number "3"; oId "CUFF.41732.1"; tss\_id "TSS31205";

chr18 Cufflinks exon9318628 9319179 . - . gene\_id "XLOC\_024662"; transcript\_id "TCONS\_00041440"; exon\_number "1"; oId "CUFF.41736.3"; tss\_id "TSS31207";

chr18 Cufflinks exon9322060 9322150 . - . gene\_id "XLOC\_024662"; transcript\_id "TCONS\_00041440"; exon\_number "2"; oId "CUFF.41736.3"; tss\_id "TSS31207";

chr18 Cufflinks exon9334135 9334442 . - . gene\_id "XLOC\_024662"; transcript\_id "TCONS\_00041440"; exon\_number "3"; oId "CUFF.41736.3"; tss\_id "TSS31207";

chr18 Cufflinks exon9318628 9319180 . - . gene\_id "XLOC\_024662"; transcript\_id "TCONS\_00041439"; exon\_number "1"; oId "CUFF.41736.2"; tss\_id "TSS31207";

chr18 Cufflinks exon9322061 9322150 . - . gene\_id "XLOC\_024662"; transcript\_id "TCONS\_00041439"; exon\_number "2"; oId "CUFF.41736.2"; tss\_id "TSS31207";

chr18 Cufflinks exon9334135 9334442 . - . gene\_id "XLOC\_024662"; transcript\_id "TCONS\_00041439"; exon\_number "3"; oId "CUFF.41736.2"; tss\_id "TSS31207";

chr18 Cufflinks exon9318628 9319118 . - . gene\_id "XLOC\_024662"; transcript\_id "TCONS\_00041438"; exon\_number "1"; oId "CUFF.41736.1"; tss\_id "TSS31207";

chr18 Cufflinks exon9322060 9322150 . - . gene\_id "XLOC\_024662"; transcript\_id "TCONS\_00041438"; exon\_number "2"; oId "CUFF.41736.1"; tss\_id "TSS31207";

chr18 Cufflinks exon9334135 9334442 . - . gene\_id "XLOC\_024662"; transcript\_id "TCONS\_00041438"; exon\_number "3"; oId "CUFF.41736.1"; tss\_id "TSS31207";

chr18 Cufflinks exon10284774 10291762 . - . gene\_id "XLOC\_024669"; transcript\_id "TCONS\_00041450"; exon\_number "1"; oId "CUFF.41760.1"; tss\_id "TSS31214";

chr18 Cufflinks exon10308364 10308570 . - . gene\_id "XLOC\_024669"; transcript\_id "TCONS\_00041450"; exon\_number "2"; oId "CUFF.41760.1"; tss\_id "TSS31214";

chr18 Cufflinks exon10311969 10312088 . - . gene\_id "XLOC\_024669"; transcript\_id "TCONS\_00041450"; exon\_number "3"; oId "CUFF.41760.1"; tss\_id "TSS31214";

chr18 Cufflinks exon10322145 10322389 . - . gene\_id "XLOC\_024669"; transcript\_id "TCONS\_00041450"; exon\_number "4"; oId "CUFF.41760.1"; tss\_id "TSS31214";

chr18 Cufflinks exon10309748 10312088 . - . gene\_id "XLOC\_024669"; transcript\_id "TCONS\_00041459"; exon\_number "1"; oId "CUFF.41760.2"; tss\_id "TSS31214";

chr18 Cufflinks exon10322145 10322389 . - . gene\_id "XLOC\_024669"; transcript\_id "TCONS\_00041459"; exon\_number "2"; oId "CUFF.41760.2"; tss\_id "TSS31214";

chr18 Cufflinks exon10330455 10330617 . - . gene\_id "XLOC\_024681"; transcript\_id "TCONS\_00041464"; exon\_number "1"; oId "CUFF.41777.1"; tss\_id "TSS31227";

chr18 Cufflinks exon10338824 10340925 . - . gene\_id "XLOC\_024681"; transcript\_id "TCONS\_00041464"; exon\_number "2"; oId "CUFF.41777.1"; tss\_id "TSS31227";

chr18 Cufflinks exon12739485 12739929 . - . gene\_id "XLOC\_024706"; transcript\_id "TCONS\_00041499"; exon\_number

|                                             |   |   |   |                                                                    |  |
|---------------------------------------------|---|---|---|--------------------------------------------------------------------|--|
| "1"; oId "CUFF.41865.3"; tss_id "TSS31259"; |   |   |   |                                                                    |  |
| chr18 Cufflinks exon12749293 12749532       | . | - | . | gene_id "XLOC_024706"; transcript_id "TCONS_00041499"; exon_number |  |
| "2"; oId "CUFF.41865.3"; tss_id "TSS31259"; |   |   |   |                                                                    |  |
| chr18 Cufflinks exon12765276 12765454       | . | - | . | gene_id "XLOC_024706"; transcript_id "TCONS_00041499"; exon_number |  |
| "3"; oId "CUFF.41865.3"; tss_id "TSS31259"; |   |   |   |                                                                    |  |
| chr18 Cufflinks exon12775668 12776176       | . | - | . | gene_id "XLOC_024706"; transcript_id "TCONS_00041499"; exon_number |  |
| "4"; oId "CUFF.41865.3"; tss_id "TSS31259"; |   |   |   |                                                                    |  |
| chr18 Cufflinks exon12739485 12739929       | . | - | . | gene_id "XLOC_024706"; transcript_id "TCONS_00041500"; exon_number |  |
| "1"; oId "CUFF.41865.2"; tss_id "TSS31259"; |   |   |   |                                                                    |  |
| chr18 Cufflinks exon12749293 12749532       | . | - | . | gene_id "XLOC_024706"; transcript_id "TCONS_00041500"; exon_number |  |
| "2"; oId "CUFF.41865.2"; tss_id "TSS31259"; |   |   |   |                                                                    |  |
| chr18 Cufflinks exon12775668 12776177       | . | - | . | gene_id "XLOC_024706"; transcript_id "TCONS_00041500"; exon_number |  |
| "3"; oId "CUFF.41865.2"; tss_id "TSS31259"; |   |   |   |                                                                    |  |
| chr18 Cufflinks exon19106359 19107074       | . | - | . | gene_id "XLOC_024754"; transcript_id "TCONS_00041558"; exon_number |  |
| "1"; oId "CUFF.42073.1"; tss_id "TSS31308"; |   |   |   |                                                                    |  |
| chr18 Cufflinks exon19107505 19108107       | . | - | . | gene_id "XLOC_024754"; transcript_id "TCONS_00041558"; exon_number |  |
| "2"; oId "CUFF.42073.1"; tss_id "TSS31308"; |   |   |   |                                                                    |  |
| chr18 Cufflinks exon20284805 20284883       | . | - | . | gene_id "XLOC_024762"; transcript_id "TCONS_00041572"; exon_number |  |
| "1"; oId "CUFF.42100.2"; tss_id "TSS31320"; |   |   |   |                                                                    |  |
| chr18 Cufflinks exon20317324 20317520       | . | - | . | gene_id "XLOC_024762"; transcript_id "TCONS_00041572"; exon_number |  |
| "2"; oId "CUFF.42100.2"; tss_id "TSS31320"; |   |   |   |                                                                    |  |
| chr18 Cufflinks exon20366713 20366821       | . | - | . | gene_id "XLOC_024762"; transcript_id "TCONS_00041572"; exon_number |  |
| "3"; oId "CUFF.42100.2"; tss_id "TSS31320"; |   |   |   |                                                                    |  |
| chr18 Cufflinks exon20500725 20500834       | . | - | . | gene_id "XLOC_024762"; transcript_id "TCONS_00041572"; exon_number |  |
| "4"; oId "CUFF.42100.2"; tss_id "TSS31320"; |   |   |   |                                                                    |  |
| chr18 Cufflinks exon20513551 20513783       | . | - | . | gene_id "XLOC_024762"; transcript_id "TCONS_00041572"; exon_number |  |
| "5"; oId "CUFF.42100.2"; tss_id "TSS31320"; |   |   |   |                                                                    |  |
| chr18 Cufflinks exon20303454 20303712       | . | - | . | gene_id "XLOC_024762"; transcript_id "TCONS_00041573"; exon_number |  |
| "1"; oId "CUFF.42100.3"; tss_id "TSS31320"; |   |   |   |                                                                    |  |
| chr18 Cufflinks exon20366713 20366823       | . | - | . | gene_id "XLOC_024762"; transcript_id "TCONS_00041573"; exon_number |  |
| "2"; oId "CUFF.42100.3"; tss_id "TSS31320"; |   |   |   |                                                                    |  |
| chr18 Cufflinks exon20500725 20500834       | . | - | . | gene_id "XLOC_024762"; transcript_id "TCONS_00041573"; exon_number |  |
| "3"; oId "CUFF.42100.3"; tss_id "TSS31320"; |   |   |   |                                                                    |  |
| chr18 Cufflinks exon20513551 20513783       | . | - | . | gene_id "XLOC_024762"; transcript_id "TCONS_00041573"; exon_number |  |
| "4"; oId "CUFF.42100.3"; tss_id "TSS31320"; |   |   |   |                                                                    |  |
| chr18 Cufflinks exon20371095 20371162       | . | - | . | gene_id "XLOC_024762"; transcript_id "TCONS_00041574"; exon_number |  |
| "1"; oId "CUFF.42100.4"; tss_id "TSS31320"; |   |   |   |                                                                    |  |
| chr18 Cufflinks exon20500725 20500834       | . | - | . | gene_id "XLOC_024762"; transcript_id "TCONS_00041574"; exon_number |  |
| "2"; oId "CUFF.42100.4"; tss_id "TSS31320"; |   |   |   |                                                                    |  |
| chr18 Cufflinks exon20513551 20513783       | . | - | . | gene_id "XLOC_024762"; transcript_id "TCONS_00041574"; exon_number |  |
| "3"; oId "CUFF.42100.4"; tss_id "TSS31320"; |   |   |   |                                                                    |  |
| chr18 Cufflinks exon20477618 20480969       | . | - | . | gene_id "XLOC_024762"; transcript_id "TCONS_00041578"; exon_number |  |
| "1"; oId "CUFF.42100.7"; tss_id "TSS31320"; |   |   |   |                                                                    |  |

|       |                |          |          |   |   |   |                                                                                                                |
|-------|----------------|----------|----------|---|---|---|----------------------------------------------------------------------------------------------------------------|
| chr18 | Cufflinks exon | 20500726 | 20500835 | . | - | . | gene_id "XLOC_024762"; transcript_id "TCONS_00041578"; exon_number "2"; oId "CUFF.42100.7"; tss_id "TSS31320"; |
| chr18 | Cufflinks exon | 20513551 | 20513772 | . | - | . | gene_id "XLOC_024762"; transcript_id "TCONS_00041578"; exon_number "3"; oId "CUFF.42100.7"; tss_id "TSS31320"; |
| chr18 | Cufflinks exon | 20477618 | 20480968 | . | - | . | gene_id "XLOC_024762"; transcript_id "TCONS_00041579"; exon_number "1"; oId "CUFF.42100.5"; tss_id "TSS31320"; |
| chr18 | Cufflinks exon | 20500725 | 20500834 | . | - | . | gene_id "XLOC_024762"; transcript_id "TCONS_00041579"; exon_number "2"; oId "CUFF.42100.5"; tss_id "TSS31320"; |
| chr18 | Cufflinks exon | 20513556 | 20513783 | . | - | . | gene_id "XLOC_024762"; transcript_id "TCONS_00041579"; exon_number "3"; oId "CUFF.42100.5"; tss_id "TSS31320"; |
| chr18 | Cufflinks exon | 21539539 | 21539989 | . | - | . | gene_id "XLOC_024777"; transcript_id "TCONS_00041600"; exon_number "1"; oId "CUFF.42153.1"; tss_id "TSS31338"; |
| chr18 | Cufflinks exon | 21547612 | 21548492 | . | - | . | gene_id "XLOC_024777"; transcript_id "TCONS_00041600"; exon_number "2"; oId "CUFF.42153.1"; tss_id "TSS31338"; |
| chr18 | Cufflinks exon | 21542407 | 21544154 | . | - | . | gene_id "XLOC_024777"; transcript_id "TCONS_00041601"; exon_number "1"; oId "CUFF.42153.2"; tss_id "TSS31339"; |
| chr18 | Cufflinks exon | 21547612 | 21547706 | . | - | . | gene_id "XLOC_024777"; transcript_id "TCONS_00041601"; exon_number "2"; oId "CUFF.42153.2"; tss_id "TSS31339"; |
| chr18 | Cufflinks exon | 21548473 | 21548834 | . | - | . | gene_id "XLOC_024777"; transcript_id "TCONS_00041601"; exon_number "3"; oId "CUFF.42153.2"; tss_id "TSS31339"; |
| chr18 | Cufflinks exon | 24238971 | 24239444 | . | - | . | gene_id "XLOC_024788"; transcript_id "TCONS_00041638"; exon_number "1"; oId "CUFF.42204.6"; tss_id "TSS31356"; |
| chr18 | Cufflinks exon | 24283356 | 24283634 | . | - | . | gene_id "XLOC_024788"; transcript_id "TCONS_00041638"; exon_number "2"; oId "CUFF.42204.6"; tss_id "TSS31356"; |
| chr18 | Cufflinks exon | 24245743 | 24246483 | . | - | . | gene_id "XLOC_024788"; transcript_id "TCONS_00041642"; exon_number "1"; oId "CUFF.42204.7"; tss_id "TSS31358"; |
| chr18 | Cufflinks exon | 24246735 | 24253885 | . | - | . | gene_id "XLOC_024788"; transcript_id "TCONS_00041642"; exon_number "2"; oId "CUFF.42204.7"; tss_id "TSS31358"; |
| chr18 | Cufflinks exon | 24258925 | 24269935 | . | - | . | gene_id "XLOC_024788"; transcript_id "TCONS_00041644"; exon_number "1"; oId "CUFF.42204.8"; tss_id "TSS31356"; |
| chr18 | Cufflinks exon | 24283356 | 24283652 | . | - | . | gene_id "XLOC_024788"; transcript_id "TCONS_00041644"; exon_number "2"; oId "CUFF.42204.8"; tss_id "TSS31356"; |
| chr18 | Cufflinks exon | 36786888 | 36788753 | . | - | . | gene_id "XLOC_024864"; transcript_id "TCONS_00041732"; exon_number "1"; oId "CUFF.42472.1"; tss_id "TSS31442"; |
| chr18 | Cufflinks exon | 36968393 | 36968491 | . | - | . | gene_id "XLOC_024864"; transcript_id "TCONS_00041732"; exon_number "2"; oId "CUFF.42472.1"; tss_id "TSS31442"; |
| chr18 | Cufflinks exon | 37115422 | 37115579 | . | - | . | gene_id "XLOC_024864"; transcript_id "TCONS_00041732"; exon_number "3"; oId "CUFF.42472.1"; tss_id "TSS31442"; |
| chr18 | Cufflinks exon | 37331293 | 37331324 | . | - | . | gene_id "XLOC_024864"; transcript_id "TCONS_00041732"; exon_number "4"; oId "CUFF.42472.1"; tss_id "TSS31442"; |
| chr18 | Cufflinks exon | 37341759 | 37342297 | . | - | . | gene_id "XLOC_024864"; transcript_id "TCONS_00041732"; exon_number "5"; oId "CUFF.42472.1"; tss_id "TSS31442"; |
| chr18 | Cufflinks exon | 36786888 | 36788753 | . | - | . | gene_id "XLOC_024864"; transcript_id "TCONS_00041733"; exon_number                                             |

|                                             |   |   |   |                                                                    |  |
|---------------------------------------------|---|---|---|--------------------------------------------------------------------|--|
| "1"; oId "CUFF.42472.2"; tss_id "TSS31443"; |   |   |   |                                                                    |  |
| chr18 Cufflinks exon36968393 36968491       | . | - | . | gene_id "XLOC_024864"; transcript_id "TCONS_00041733"; exon_number |  |
| "2"; oId "CUFF.42472.2"; tss_id "TSS31443"; |   |   |   |                                                                    |  |
| chr18 Cufflinks exon37115422 37115579       | . | - | . | gene_id "XLOC_024864"; transcript_id "TCONS_00041733"; exon_number |  |
| "3"; oId "CUFF.42472.2"; tss_id "TSS31443"; |   |   |   |                                                                    |  |
| chr18 Cufflinks exon37331293 37331324       | . | - | . | gene_id "XLOC_024864"; transcript_id "TCONS_00041733"; exon_number |  |
| "4"; oId "CUFF.42472.2"; tss_id "TSS31443"; |   |   |   |                                                                    |  |
| chr18 Cufflinks exon37380033 37380272       | . | - | . | gene_id "XLOC_024864"; transcript_id "TCONS_00041733"; exon_number |  |
| "5"; oId "CUFF.42472.2"; tss_id "TSS31443"; |   |   |   |                                                                    |  |
| chr18 Cufflinks exon36919408 36920681       | . | - | . | gene_id "XLOC_024864"; transcript_id "TCONS_00041765"; exon_number |  |
| "1"; oId "CUFF.42472.3"; tss_id "TSS31443"; |   |   |   |                                                                    |  |
| chr18 Cufflinks exon37115422 37115579       | . | - | . | gene_id "XLOC_024864"; transcript_id "TCONS_00041765"; exon_number |  |
| "2"; oId "CUFF.42472.3"; tss_id "TSS31443"; |   |   |   |                                                                    |  |
| chr18 Cufflinks exon37331293 37331324       | . | - | . | gene_id "XLOC_024864"; transcript_id "TCONS_00041765"; exon_number |  |
| "3"; oId "CUFF.42472.3"; tss_id "TSS31443"; |   |   |   |                                                                    |  |
| chr18 Cufflinks exon37380033 37380282       | . | - | . | gene_id "XLOC_024864"; transcript_id "TCONS_00041765"; exon_number |  |
| "4"; oId "CUFF.42472.3"; tss_id "TSS31443"; |   |   |   |                                                                    |  |
| chr18 Cufflinks exon36928545 36928721       | . | - | . | gene_id "XLOC_024864"; transcript_id "TCONS_00041771"; exon_number |  |
| "1"; oId "CUFF.42472.5"; tss_id "TSS31443"; |   |   |   |                                                                    |  |
| chr18 Cufflinks exon37115422 37115579       | . | - | . | gene_id "XLOC_024864"; transcript_id "TCONS_00041771"; exon_number |  |
| "2"; oId "CUFF.42472.5"; tss_id "TSS31443"; |   |   |   |                                                                    |  |
| chr18 Cufflinks exon37331293 37331324       | . | - | . | gene_id "XLOC_024864"; transcript_id "TCONS_00041771"; exon_number |  |
| "3"; oId "CUFF.42472.5"; tss_id "TSS31443"; |   |   |   |                                                                    |  |
| chr18 Cufflinks exon37380033 37380253       | . | - | . | gene_id "XLOC_024864"; transcript_id "TCONS_00041771"; exon_number |  |
| "4"; oId "CUFF.42472.5"; tss_id "TSS31443"; |   |   |   |                                                                    |  |
| chr18 Cufflinks exon36928545 36928721       | . | - | . | gene_id "XLOC_024864"; transcript_id "TCONS_00041772"; exon_number |  |
| "1"; oId "CUFF.42472.4"; tss_id "TSS31443"; |   |   |   |                                                                    |  |
| chr18 Cufflinks exon36968393 36968491       | . | - | . | gene_id "XLOC_024864"; transcript_id "TCONS_00041772"; exon_number |  |
| "2"; oId "CUFF.42472.4"; tss_id "TSS31443"; |   |   |   |                                                                    |  |
| chr18 Cufflinks exon37115422 37115579       | . | - | . | gene_id "XLOC_024864"; transcript_id "TCONS_00041772"; exon_number |  |
| "3"; oId "CUFF.42472.4"; tss_id "TSS31443"; |   |   |   |                                                                    |  |
| chr18 Cufflinks exon37331293 37331324       | . | - | . | gene_id "XLOC_024864"; transcript_id "TCONS_00041772"; exon_number |  |
| "4"; oId "CUFF.42472.4"; tss_id "TSS31443"; |   |   |   |                                                                    |  |
| chr18 Cufflinks exon37380033 37380272       | . | - | . | gene_id "XLOC_024864"; transcript_id "TCONS_00041772"; exon_number |  |
| "5"; oId "CUFF.42472.4"; tss_id "TSS31443"; |   |   |   |                                                                    |  |
| chr18 Cufflinks exon39045868 39047744       | . | - | . | gene_id "XLOC_025004"; transcript_id "TCONS_00041878"; exon_number |  |
| "1"; oId "CUFF.42671.1"; tss_id "TSS31585"; |   |   |   |                                                                    |  |
| chr18 Cufflinks exon39081084 39081240       | . | - | . | gene_id "XLOC_025004"; transcript_id "TCONS_00041878"; exon_number |  |
| "2"; oId "CUFF.42671.1"; tss_id "TSS31585"; |   |   |   |                                                                    |  |
| chr18 Cufflinks exon39096384 39096519       | . | - | . | gene_id "XLOC_025004"; transcript_id "TCONS_00041878"; exon_number |  |
| "3"; oId "CUFF.42671.1"; tss_id "TSS31585"; |   |   |   |                                                                    |  |
| chr18 Cufflinks exon39100348 39100788       | . | - | . | gene_id "XLOC_025004"; transcript_id "TCONS_00041878"; exon_number |  |
| "4"; oId "CUFF.42671.1"; tss_id "TSS31585"; |   |   |   |                                                                    |  |

|       |                        |          |   |   |   |                                                                                                                |
|-------|------------------------|----------|---|---|---|----------------------------------------------------------------------------------------------------------------|
| chr18 | Cufflinks exon39045868 | 39047744 | . | - | . | gene_id "XLOC_025004"; transcript_id "TCONS_00041879"; exon_number "1"; oId "CUFF.42671.2"; tss_id "TSS31586"; |
| chr18 | Cufflinks exon39062409 | 39062541 | . | - | . | gene_id "XLOC_025004"; transcript_id "TCONS_00041879"; exon_number "2"; oId "CUFF.42671.2"; tss_id "TSS31586"; |
| chr18 | Cufflinks exon39081084 | 39081240 | . | - | . | gene_id "XLOC_025004"; transcript_id "TCONS_00041879"; exon_number "3"; oId "CUFF.42671.2"; tss_id "TSS31586"; |
| chr18 | Cufflinks exon39096384 | 39096519 | . | - | . | gene_id "XLOC_025004"; transcript_id "TCONS_00041879"; exon_number "4"; oId "CUFF.42671.2"; tss_id "TSS31586"; |
| chr18 | Cufflinks exon39101341 | 39101460 | . | - | . | gene_id "XLOC_025004"; transcript_id "TCONS_00041879"; exon_number "5"; oId "CUFF.42671.2"; tss_id "TSS31586"; |
| chr18 | Cufflinks exon39105319 | 39105490 | . | - | . | gene_id "XLOC_025004"; transcript_id "TCONS_00041879"; exon_number "6"; oId "CUFF.42671.2"; tss_id "TSS31586"; |
| chr18 | Cufflinks exon39211964 | 39212234 | . | - | . | gene_id "XLOC_025004"; transcript_id "TCONS_00041879"; exon_number "7"; oId "CUFF.42671.2"; tss_id "TSS31586"; |
| chr18 | Cufflinks exon39060197 | 39061231 | . | - | . | gene_id "XLOC_025004"; transcript_id "TCONS_00041880"; exon_number "1"; oId "CUFF.42671.4"; tss_id "TSS31587"; |
| chr18 | Cufflinks exon39061846 | 39061921 | . | - | . | gene_id "XLOC_025004"; transcript_id "TCONS_00041880"; exon_number "2"; oId "CUFF.42671.4"; tss_id "TSS31587"; |
| chr18 | Cufflinks exon39062409 | 39062541 | . | - | . | gene_id "XLOC_025004"; transcript_id "TCONS_00041880"; exon_number "3"; oId "CUFF.42671.4"; tss_id "TSS31587"; |
| chr18 | Cufflinks exon39081084 | 39081240 | . | - | . | gene_id "XLOC_025004"; transcript_id "TCONS_00041880"; exon_number "4"; oId "CUFF.42671.4"; tss_id "TSS31587"; |
| chr18 | Cufflinks exon39096384 | 39096519 | . | - | . | gene_id "XLOC_025004"; transcript_id "TCONS_00041880"; exon_number "5"; oId "CUFF.42671.4"; tss_id "TSS31587"; |
| chr18 | Cufflinks exon39100348 | 39100561 | . | - | . | gene_id "XLOC_025004"; transcript_id "TCONS_00041880"; exon_number "6"; oId "CUFF.42671.4"; tss_id "TSS31587"; |
| chr18 | Cufflinks exon39060197 | 39061231 | . | - | . | gene_id "XLOC_025004"; transcript_id "TCONS_00041881"; exon_number "1"; oId "CUFF.42671.3"; tss_id "TSS31586"; |
| chr18 | Cufflinks exon39061846 | 39061921 | . | - | . | gene_id "XLOC_025004"; transcript_id "TCONS_00041881"; exon_number "2"; oId "CUFF.42671.3"; tss_id "TSS31586"; |
| chr18 | Cufflinks exon39062409 | 39062541 | . | - | . | gene_id "XLOC_025004"; transcript_id "TCONS_00041881"; exon_number "3"; oId "CUFF.42671.3"; tss_id "TSS31586"; |
| chr18 | Cufflinks exon39081084 | 39081240 | . | - | . | gene_id "XLOC_025004"; transcript_id "TCONS_00041881"; exon_number "4"; oId "CUFF.42671.3"; tss_id "TSS31586"; |
| chr18 | Cufflinks exon39096384 | 39096521 | . | - | . | gene_id "XLOC_025004"; transcript_id "TCONS_00041881"; exon_number "5"; oId "CUFF.42671.3"; tss_id "TSS31586"; |
| chr18 | Cufflinks exon39211964 | 39212234 | . | - | . | gene_id "XLOC_025004"; transcript_id "TCONS_00041881"; exon_number "6"; oId "CUFF.42671.3"; tss_id "TSS31586"; |
| chr18 | Cufflinks exon43074059 | 43074184 | . | - | . | gene_id "XLOC_025009"; transcript_id "TCONS_00041887"; exon_number "1"; oId "CUFF.42693.2"; tss_id "TSS31592"; |
| chr18 | Cufflinks exon43191456 | 43191505 | . | - | . | gene_id "XLOC_025009"; transcript_id "TCONS_00041887"; exon_number "2"; oId "CUFF.42693.2"; tss_id "TSS31592"; |
| chr18 | Cufflinks exon43191601 | 43191762 | . | - | . | gene_id "XLOC_025009"; transcript_id "TCONS_00041887"; exon_number "3"; oId "CUFF.42693.2"; tss_id "TSS31592"; |

|                                             |   |   |   |                                                                    |  |
|---------------------------------------------|---|---|---|--------------------------------------------------------------------|--|
| "3"; oId "CUFF.42693.2"; tss_id "TSS31592"; |   |   |   |                                                                    |  |
| chr18 Cufflinks exon43268714 43268911       | . | - | . | gene_id "XLOC_025009"; transcript_id "TCONS_00041887"; exon_number |  |
| "4"; oId "CUFF.42693.2"; tss_id "TSS31592"; |   |   |   |                                                                    |  |
| chr18 Cufflinks exon43074059 43074184       | . | - | . | gene_id "XLOC_025009"; transcript_id "TCONS_00041886"; exon_number |  |
| "1"; oId "CUFF.42693.1"; tss_id "TSS31592"; |   |   |   |                                                                    |  |
| chr18 Cufflinks exon43191456 43191505       | . | - | . | gene_id "XLOC_025009"; transcript_id "TCONS_00041886"; exon_number |  |
| "2"; oId "CUFF.42693.1"; tss_id "TSS31592"; |   |   |   |                                                                    |  |
| chr18 Cufflinks exon43191601 43191762       | . | - | . | gene_id "XLOC_025009"; transcript_id "TCONS_00041886"; exon_number |  |
| "3"; oId "CUFF.42693.1"; tss_id "TSS31592"; |   |   |   |                                                                    |  |
| chr18 Cufflinks exon43216788 43217122       | . | - | . | gene_id "XLOC_025009"; transcript_id "TCONS_00041886"; exon_number |  |
| "4"; oId "CUFF.42693.1"; tss_id "TSS31592"; |   |   |   |                                                                    |  |
| chr18 Cufflinks exon43268714 43268911       | . | - | . | gene_id "XLOC_025009"; transcript_id "TCONS_00041886"; exon_number |  |
| "5"; oId "CUFF.42693.1"; tss_id "TSS31592"; |   |   |   |                                                                    |  |
| chr18 Cufflinks exon43151233 43151470       | . | - | . | gene_id "XLOC_025009"; transcript_id "TCONS_00041888"; exon_number |  |
| "1"; oId "CUFF.42693.3"; tss_id "TSS31592"; |   |   |   |                                                                    |  |
| chr18 Cufflinks exon43191456 43191505       | . | - | . | gene_id "XLOC_025009"; transcript_id "TCONS_00041888"; exon_number |  |
| "2"; oId "CUFF.42693.3"; tss_id "TSS31592"; |   |   |   |                                                                    |  |
| chr18 Cufflinks exon43191601 43191763       | . | - | . | gene_id "XLOC_025009"; transcript_id "TCONS_00041888"; exon_number |  |
| "3"; oId "CUFF.42693.3"; tss_id "TSS31592"; |   |   |   |                                                                    |  |
| chr18 Cufflinks exon43216789 43217122       | . | - | . | gene_id "XLOC_025009"; transcript_id "TCONS_00041888"; exon_number |  |
| "4"; oId "CUFF.42693.3"; tss_id "TSS31592"; |   |   |   |                                                                    |  |
| chr18 Cufflinks exon43268714 43268911       | . | - | . | gene_id "XLOC_025009"; transcript_id "TCONS_00041888"; exon_number |  |
| "5"; oId "CUFF.42693.3"; tss_id "TSS31592"; |   |   |   |                                                                    |  |
| chr18 Cufflinks exon57917311 57917620       | . | - | . | gene_id "XLOC_025100"; transcript_id "TCONS_00042056"; exon_number |  |
| "1"; oId "CUFF.43100.2"; tss_id "TSS31720"; |   |   |   |                                                                    |  |
| chr18 Cufflinks exon57918875 57918960       | . | - | . | gene_id "XLOC_025100"; transcript_id "TCONS_00042056"; exon_number |  |
| "2"; oId "CUFF.43100.2"; tss_id "TSS31720"; |   |   |   |                                                                    |  |
| chr18 Cufflinks exon57939434 57939490       | . | - | . | gene_id "XLOC_025100"; transcript_id "TCONS_00042056"; exon_number |  |
| "3"; oId "CUFF.43100.2"; tss_id "TSS31720"; |   |   |   |                                                                    |  |
| chr18 Cufflinks exon57939590 57939645       | . | - | . | gene_id "XLOC_025100"; transcript_id "TCONS_00042056"; exon_number |  |
| "4"; oId "CUFF.43100.2"; tss_id "TSS31720"; |   |   |   |                                                                    |  |
| chr18 Cufflinks exon57939761 57939899       | . | - | . | gene_id "XLOC_025100"; transcript_id "TCONS_00042056"; exon_number |  |
| "5"; oId "CUFF.43100.2"; tss_id "TSS31720"; |   |   |   |                                                                    |  |
| chr18 Cufflinks exon57917311 57917618       | . | - | . | gene_id "XLOC_025100"; transcript_id "TCONS_00042055"; exon_number |  |
| "1"; oId "CUFF.43100.1"; tss_id "TSS31720"; |   |   |   |                                                                    |  |
| chr18 Cufflinks exon57918874 57918960       | . | - | . | gene_id "XLOC_025100"; transcript_id "TCONS_00042055"; exon_number |  |
| "2"; oId "CUFF.43100.1"; tss_id "TSS31720"; |   |   |   |                                                                    |  |
| chr18 Cufflinks exon57939761 57939899       | . | - | . | gene_id "XLOC_025100"; transcript_id "TCONS_00042055"; exon_number |  |
| "3"; oId "CUFF.43100.1"; tss_id "TSS31720"; |   |   |   |                                                                    |  |
| chr18 Cufflinks exon71378038 71378748       | . | - | . | gene_id "XLOC_025153"; transcript_id "TCONS_00042148"; exon_number |  |
| "1"; oId "CUFF.43267.1"; tss_id "TSS31797"; |   |   |   |                                                                    |  |
| chr18 Cufflinks exon71379971 71380080       | . | - | . | gene_id "XLOC_025153"; transcript_id "TCONS_00042148"; exon_number |  |
| "2"; oId "CUFF.43267.1"; tss_id "TSS31797"; |   |   |   |                                                                    |  |



|       |                        |          |   |   |   |                                                                                                                |
|-------|------------------------|----------|---|---|---|----------------------------------------------------------------------------------------------------------------|
| chr18 | Cufflinks exon71382466 | 71382667 | . | - | . | gene_id "XLOC_025153"; transcript_id "TCONS_00042148"; exon_number "3"; oId "CUFF.43267.1"; tss_id "TSS31797"; |
| chr18 | Cufflinks exon71383424 | 71383551 | . | - | . | gene_id "XLOC_025153"; transcript_id "TCONS_00042148"; exon_number "4"; oId "CUFF.43267.1"; tss_id "TSS31797"; |
| chr18 | Cufflinks exon71476373 | 71476505 | . | - | . | gene_id "XLOC_025153"; transcript_id "TCONS_00042148"; exon_number "5"; oId "CUFF.43267.1"; tss_id "TSS31797"; |
| chr18 | Cufflinks exon71380261 | 71383201 | . | - | . | gene_id "XLOC_025153"; transcript_id "TCONS_00042149"; exon_number "1"; oId "CUFF.43267.3"; tss_id "TSS31798"; |
| chr18 | Cufflinks exon71388145 | 71388685 | . | - | . | gene_id "XLOC_025153"; transcript_id "TCONS_00042149"; exon_number "2"; oId "CUFF.43267.3"; tss_id "TSS31798"; |
| chr18 | Cufflinks exon71380261 | 71383551 | . | - | . | gene_id "XLOC_025153"; transcript_id "TCONS_00042150"; exon_number "1"; oId "CUFF.43267.4"; tss_id "TSS31797"; |
| chr18 | Cufflinks exon71476373 | 71476505 | . | - | . | gene_id "XLOC_025153"; transcript_id "TCONS_00042150"; exon_number "2"; oId "CUFF.43267.4"; tss_id "TSS31797"; |
| chr18 | Cufflinks exon72259010 | 72261076 | . | - | . | gene_id "XLOC_025163"; transcript_id "TCONS_00042172"; exon_number "1"; oId "CUFF.43297.2"; tss_id "TSS31814"; |
| chr18 | Cufflinks exon72263665 | 72265071 | . | - | . | gene_id "XLOC_025163"; transcript_id "TCONS_00042172"; exon_number "2"; oId "CUFF.43297.2"; tss_id "TSS31814"; |
| chr18 | Cufflinks exon72259010 | 72261075 | . | - | . | gene_id "XLOC_025163"; transcript_id "TCONS_00042173"; exon_number "1"; oId "CUFF.43297.1"; tss_id "TSS31815"; |
| chr18 | Cufflinks exon72263664 | 72265287 | . | - | . | gene_id "XLOC_025163"; transcript_id "TCONS_00042173"; exon_number "2"; oId "CUFF.43297.1"; tss_id "TSS31815"; |
| chr18 | Cufflinks exon72779737 | 72782626 | . | - | . | gene_id "XLOC_025165"; transcript_id "TCONS_00042177"; exon_number "1"; oId "CUFF.43304.2"; tss_id "TSS31817"; |
| chr18 | Cufflinks exon72782891 | 72782936 | . | - | . | gene_id "XLOC_025165"; transcript_id "TCONS_00042177"; exon_number "2"; oId "CUFF.43304.2"; tss_id "TSS31817"; |
| chr18 | Cufflinks exon74503219 | 74504484 | . | - | . | gene_id "XLOC_025176"; transcript_id "TCONS_00042201"; exon_number "1"; oId "CUFF.43342.1"; tss_id "TSS31836"; |
| chr18 | Cufflinks exon74505080 | 74505226 | . | - | . | gene_id "XLOC_025176"; transcript_id "TCONS_00042201"; exon_number "2"; oId "CUFF.43342.1"; tss_id "TSS31836"; |
| chr18 | Cufflinks exon74519427 | 74521124 | . | - | . | gene_id "XLOC_025176"; transcript_id "TCONS_00042201"; exon_number "3"; oId "CUFF.43342.1"; tss_id "TSS31836"; |
| chr18 | Cufflinks exon74521342 | 74521460 | . | - | . | gene_id "XLOC_025176"; transcript_id "TCONS_00042201"; exon_number "4"; oId "CUFF.43342.1"; tss_id "TSS31836"; |
| chr18 | Cufflinks exon74528711 | 74528798 | . | - | . | gene_id "XLOC_025176"; transcript_id "TCONS_00042201"; exon_number "5"; oId "CUFF.43342.1"; tss_id "TSS31836"; |
| chr18 | Cufflinks exon74533972 | 74534261 | . | - | . | gene_id "XLOC_025176"; transcript_id "TCONS_00042201"; exon_number "6"; oId "CUFF.43342.1"; tss_id "TSS31836"; |
| chr18 | Cufflinks exon74506688 | 74507614 | . | - | . | gene_id "XLOC_025176"; transcript_id "TCONS_00042202"; exon_number "1"; oId "CUFF.43342.2"; tss_id "TSS31836"; |
| chr18 | Cufflinks exon74528711 | 74528798 | . | - | . | gene_id "XLOC_025176"; transcript_id "TCONS_00042202"; exon_number "2"; oId "CUFF.43342.2"; tss_id "TSS31836"; |
| chr18 | Cufflinks exon74533972 | 74534251 | . | - | . | gene_id "XLOC_025176"; transcript_id "TCONS_00042202"; exon_number "3"; oId "CUFF.43342.2"; tss_id "TSS31836"; |

"3"; oId "CUFF.43342.2"; tss\_id "TSS31836";  
chr18 Cufflinks exon74517018 74517445 . - . gene\_id "XLOC\_025176"; transcript\_id "TCONS\_00042205"; exon\_number  
"1"; oId "CUFF.43342.7"; tss\_id "TSS31836";  
chr18 Cufflinks exon74520262 74520354 . - . gene\_id "XLOC\_025176"; transcript\_id "TCONS\_00042205"; exon\_number  
"2"; oId "CUFF.43342.7"; tss\_id "TSS31836";  
chr18 Cufflinks exon74520890 74521460 . - . gene\_id "XLOC\_025176"; transcript\_id "TCONS\_00042205"; exon\_number  
"3"; oId "CUFF.43342.7"; tss\_id "TSS31836";  
chr18 Cufflinks exon74533972 74534251 . - . gene\_id "XLOC\_025176"; transcript\_id "TCONS\_00042205"; exon\_number  
"4"; oId "CUFF.43342.7"; tss\_id "TSS31836";  
chr18 Cufflinks exon74517018 74521460 . - . gene\_id "XLOC\_025176"; transcript\_id "TCONS\_00042204"; exon\_number  
"1"; oId "CUFF.43342.5"; tss\_id "TSS31836";  
chr18 Cufflinks exon74528711 74528798 . - . gene\_id "XLOC\_025176"; transcript\_id "TCONS\_00042204"; exon\_number  
"2"; oId "CUFF.43342.5"; tss\_id "TSS31836";  
chr18 Cufflinks exon74533972 74534251 . - . gene\_id "XLOC\_025176"; transcript\_id "TCONS\_00042204"; exon\_number  
"3"; oId "CUFF.43342.5"; tss\_id "TSS31836";  
chr18 Cufflinks exon74517018 74521461 . - . gene\_id "XLOC\_025176"; transcript\_id "TCONS\_00042207"; exon\_number  
"1"; oId "CUFF.43342.4"; tss\_id "TSS31836";  
chr18 Cufflinks exon74528711 74528798 . - . gene\_id "XLOC\_025176"; transcript\_id "TCONS\_00042207"; exon\_number  
"2"; oId "CUFF.43342.4"; tss\_id "TSS31836";  
chr18 Cufflinks exon74533972 74534257 . - . gene\_id "XLOC\_025176"; transcript\_id "TCONS\_00042207"; exon\_number  
"3"; oId "CUFF.43342.4"; tss\_id "TSS31836";  
chr18 Cufflinks exon74517018 74521460 . - . gene\_id "XLOC\_025176"; transcript\_id "TCONS\_00042206"; exon\_number  
"1"; oId "CUFF.43342.3"; tss\_id "TSS31836";  
chr18 Cufflinks exon74533972 74534257 . - . gene\_id "XLOC\_025176"; transcript\_id "TCONS\_00042206"; exon\_number  
"2"; oId "CUFF.43342.3"; tss\_id "TSS31836";  
chr18 Cufflinks exon74517018 74517445 . - . gene\_id "XLOC\_025176"; transcript\_id "TCONS\_00042208"; exon\_number  
"1"; oId "CUFF.43342.6"; tss\_id "TSS31836";  
chr18 Cufflinks exon74520262 74521460 . - . gene\_id "XLOC\_025176"; transcript\_id "TCONS\_00042208"; exon\_number  
"2"; oId "CUFF.43342.6"; tss\_id "TSS31836";  
chr18 Cufflinks exon74533972 74534261 . - . gene\_id "XLOC\_025176"; transcript\_id "TCONS\_00042208"; exon\_number  
"3"; oId "CUFF.43342.6"; tss\_id "TSS31836";  
chr18 Cufflinks exon76399206 76400891 . - . gene\_id "XLOC\_025189"; transcript\_id "TCONS\_00042222"; exon\_number  
"1"; oId "CUFF.43379.1"; tss\_id "TSS31851";  
chr18 Cufflinks exon76402192 76403028 . - . gene\_id "XLOC\_025189"; transcript\_id "TCONS\_00042222"; exon\_number  
"2"; oId "CUFF.43379.1"; tss\_id "TSS31851";  
chr18 Cufflinks exon76399206 76401175 . - . gene\_id "XLOC\_025189"; transcript\_id "TCONS\_00042223"; exon\_number  
"1"; oId "CUFF.43379.2"; tss\_id "TSS31851";  
chr18 Cufflinks exon76403034 76403066 . - . gene\_id "XLOC\_025189"; transcript\_id "TCONS\_00042223"; exon\_number  
"2"; oId "CUFF.43379.2"; tss\_id "TSS31851";  
chr18 Cufflinks exon76423771 76426200 . - . gene\_id "XLOC\_025193"; transcript\_id "TCONS\_00042227"; exon\_number  
"1"; oId "CUFF.43383.1"; tss\_id "TSS31855";  
chr18 Cufflinks exon76430216 76430440 . - . gene\_id "XLOC\_025193"; transcript\_id "TCONS\_00042227"; exon\_number  
"2"; oId "CUFF.43383.1"; tss\_id "TSS31855";

|       |                        |          |   |   |   |                                                                                                                |
|-------|------------------------|----------|---|---|---|----------------------------------------------------------------------------------------------------------------|
| chr18 | Cufflinks exon76430911 | 76431042 | . | - | . | gene_id "XLOC_025193"; transcript_id "TCONS_00042227"; exon_number "3"; oId "CUFF.43383.1"; tss_id "TSS31855"; |
| chr18 | Cufflinks exon76431178 | 76431276 | . | - | . | gene_id "XLOC_025193"; transcript_id "TCONS_00042227"; exon_number "4"; oId "CUFF.43383.1"; tss_id "TSS31855"; |
| chr18 | Cufflinks exon76431386 | 76431850 | . | - | . | gene_id "XLOC_025193"; transcript_id "TCONS_00042227"; exon_number "5"; oId "CUFF.43383.1"; tss_id "TSS31855"; |
| chr18 | Cufflinks exon76438036 | 76438262 | . | - | . | gene_id "XLOC_025193"; transcript_id "TCONS_00042227"; exon_number "6"; oId "CUFF.43383.1"; tss_id "TSS31855"; |
| chr18 | Cufflinks exon76423771 | 76426200 | . | - | . | gene_id "XLOC_025193"; transcript_id "TCONS_00042228"; exon_number "1"; oId "CUFF.43383.2"; tss_id "TSS31856"; |
| chr18 | Cufflinks exon76430216 | 76430440 | . | - | . | gene_id "XLOC_025193"; transcript_id "TCONS_00042228"; exon_number "2"; oId "CUFF.43383.2"; tss_id "TSS31856"; |
| chr18 | Cufflinks exon76430911 | 76431042 | . | - | . | gene_id "XLOC_025193"; transcript_id "TCONS_00042228"; exon_number "3"; oId "CUFF.43383.2"; tss_id "TSS31856"; |
| chr18 | Cufflinks exon76431178 | 76431273 | . | - | . | gene_id "XLOC_025193"; transcript_id "TCONS_00042228"; exon_number "4"; oId "CUFF.43383.2"; tss_id "TSS31856"; |
| chr18 | Cufflinks exon76431386 | 76431850 | . | - | . | gene_id "XLOC_025193"; transcript_id "TCONS_00042228"; exon_number "5"; oId "CUFF.43383.2"; tss_id "TSS31856"; |
| chr18 | Cufflinks exon76438036 | 76439020 | . | - | . | gene_id "XLOC_025193"; transcript_id "TCONS_00042228"; exon_number "6"; oId "CUFF.43383.2"; tss_id "TSS31856"; |
| chr18 | Cufflinks exon76655136 | 76661072 | . | - | . | gene_id "XLOC_025198"; transcript_id "TCONS_00042235"; exon_number "1"; oId "CUFF.43401.3"; tss_id "TSS31861"; |
| chr18 | Cufflinks exon76661109 | 76664642 | . | - | . | gene_id "XLOC_025198"; transcript_id "TCONS_00042235"; exon_number "2"; oId "CUFF.43401.3"; tss_id "TSS31861"; |
| chr18 | Cufflinks exon76683287 | 76683457 | . | - | . | gene_id "XLOC_025198"; transcript_id "TCONS_00042235"; exon_number "3"; oId "CUFF.43401.3"; tss_id "TSS31861"; |
| chr18 | Cufflinks exon76684313 | 76684378 | . | - | . | gene_id "XLOC_025198"; transcript_id "TCONS_00042235"; exon_number "4"; oId "CUFF.43401.3"; tss_id "TSS31861"; |
| chr18 | Cufflinks exon76684793 | 76685228 | . | - | . | gene_id "XLOC_025198"; transcript_id "TCONS_00042235"; exon_number "5"; oId "CUFF.43401.3"; tss_id "TSS31861"; |
| chr18 | Cufflinks exon76692146 | 76692185 | . | - | . | gene_id "XLOC_025198"; transcript_id "TCONS_00042235"; exon_number "6"; oId "CUFF.43401.3"; tss_id "TSS31861"; |
| chr18 | Cufflinks exon76693911 | 76695150 | . | - | . | gene_id "XLOC_025198"; transcript_id "TCONS_00042235"; exon_number "7"; oId "CUFF.43401.3"; tss_id "TSS31861"; |
| chr18 | Cufflinks exon76699787 | 76699944 | . | - | . | gene_id "XLOC_025198"; transcript_id "TCONS_00042235"; exon_number "8"; oId "CUFF.43401.3"; tss_id "TSS31861"; |
| chr18 | Cufflinks exon76655136 | 76664642 | . | - | . | gene_id "XLOC_025198"; transcript_id "TCONS_00042234"; exon_number "1"; oId "CUFF.43401.2"; tss_id "TSS31861"; |
| chr18 | Cufflinks exon76668623 | 76668750 | . | - | . | gene_id "XLOC_025198"; transcript_id "TCONS_00042234"; exon_number "2"; oId "CUFF.43401.2"; tss_id "TSS31861"; |
| chr18 | Cufflinks exon76683287 | 76683457 | . | - | . | gene_id "XLOC_025198"; transcript_id "TCONS_00042234"; exon_number "3"; oId "CUFF.43401.2"; tss_id "TSS31861"; |
| chr18 | Cufflinks exon76684793 | 76685228 | . | - | . | gene_id "XLOC_025198"; transcript_id "TCONS_00042234"; exon_number "4"; oId "CUFF.43401.2"; tss_id "TSS31861"; |

"4"; oId "CUFF.43401.2"; tss\_id "TSS31861";  
chr18 Cufflinks exon76692146 76692185 . - . gene\_id "XLOC\_025198"; transcript\_id "TCONS\_00042234"; exon\_number  
"5"; oId "CUFF.43401.2"; tss\_id "TSS31861";  
chr18 Cufflinks exon76693911 76695150 . - . gene\_id "XLOC\_025198"; transcript\_id "TCONS\_00042234"; exon\_number  
"6"; oId "CUFF.43401.2"; tss\_id "TSS31861";  
chr18 Cufflinks exon76699787 76699944 . - . gene\_id "XLOC\_025198"; transcript\_id "TCONS\_00042234"; exon\_number  
"7"; oId "CUFF.43401.2"; tss\_id "TSS31861";  
chr18 Cufflinks exon76655136 76660089 . - . gene\_id "XLOC\_025198"; transcript\_id "TCONS\_00042233"; exon\_number  
"1"; oId "CUFF.43401.1"; tss\_id "TSS31861";  
chr18 Cufflinks exon76663170 76664642 . - . gene\_id "XLOC\_025198"; transcript\_id "TCONS\_00042233"; exon\_number  
"2"; oId "CUFF.43401.1"; tss\_id "TSS31861";  
chr18 Cufflinks exon76668623 76668750 . - . gene\_id "XLOC\_025198"; transcript\_id "TCONS\_00042233"; exon\_number  
"3"; oId "CUFF.43401.1"; tss\_id "TSS31861";  
chr18 Cufflinks exon76683287 76683457 . - . gene\_id "XLOC\_025198"; transcript\_id "TCONS\_00042233"; exon\_number  
"4"; oId "CUFF.43401.1"; tss\_id "TSS31861";  
chr18 Cufflinks exon76693911 76695150 . - . gene\_id "XLOC\_025198"; transcript\_id "TCONS\_00042233"; exon\_number  
"5"; oId "CUFF.43401.1"; tss\_id "TSS31861";  
chr18 Cufflinks exon76699787 76699944 . - . gene\_id "XLOC\_025198"; transcript\_id "TCONS\_00042233"; exon\_number  
"6"; oId "CUFF.43401.1"; tss\_id "TSS31861";  
chr18 Cufflinks exon77420754 77420804 . - . gene\_id "XLOC\_025205"; transcript\_id "TCONS\_00042244"; exon\_number  
"1"; oId "CUFF.43438.1"; tss\_id "TSS31868";  
chr18 Cufflinks exon77436571 77436689 . - . gene\_id "XLOC\_025205"; transcript\_id "TCONS\_00042244"; exon\_number  
"2"; oId "CUFF.43438.1"; tss\_id "TSS31868";  
chr18 Cufflinks exon77437594 77439216 . - . gene\_id "XLOC\_025205"; transcript\_id "TCONS\_00042244"; exon\_number  
"3"; oId "CUFF.43438.1"; tss\_id "TSS31868";  
chr19 Cufflinks exon2888919 2890341 . + . gene\_id "XLOC\_025301"; transcript\_id "TCONS\_00042371"; exon\_number "1"; oId  
"CUFF.43736.2"; tss\_id "TSS31976";  
chr19 Cufflinks exon2891090 2892538 . + . gene\_id "XLOC\_025301"; transcript\_id "TCONS\_00042371"; exon\_number "2"; oId  
"CUFF.43736.2"; tss\_id "TSS31976";  
chr19 Cufflinks exon4067871 4068436 . + . gene\_id "XLOC\_025331"; transcript\_id "TCONS\_00042423"; exon\_number "1"; oId  
"CUFF.43877.2"; tss\_id "TSS32016";  
chr19 Cufflinks exon4069228 4070094 . + . gene\_id "XLOC\_025331"; transcript\_id "TCONS\_00042423"; exon\_number "2"; oId  
"CUFF.43877.2"; tss\_id "TSS32016";  
chr19 Cufflinks exon5828468 5828750 . + . gene\_id "XLOC\_025352"; transcript\_id "TCONS\_00042478"; exon\_number "1"; oId  
"CUFF.43990.2"; tss\_id "TSS32046";  
chr19 Cufflinks exon5829607 5829624 . + . gene\_id "XLOC\_025352"; transcript\_id "TCONS\_00042478"; exon\_number "2"; oId  
"CUFF.43990.2"; tss\_id "TSS32046";  
chr19 Cufflinks exon8764241 8765068 . + . gene\_id "XLOC\_025399"; transcript\_id "TCONS\_00042562"; exon\_number "1"; oId  
"CUFF.44215.1"; tss\_id "TSS32104";  
chr19 Cufflinks exon8784386 8784435 . + . gene\_id "XLOC\_025399"; transcript\_id "TCONS\_00042562"; exon\_number "2"; oId  
"CUFF.44215.1"; tss\_id "TSS32104";  
chr19 Cufflinks exon8786194 8786291 . + . gene\_id "XLOC\_025399"; transcript\_id "TCONS\_00042562"; exon\_number "3"; oId  
"CUFF.44215.1"; tss\_id "TSS32104";

|       |                        |          |   |   |   |                                                                                                                |
|-------|------------------------|----------|---|---|---|----------------------------------------------------------------------------------------------------------------|
| chr19 | Cufflinks exon8786586  | 8793548  | . | + | . | gene_id "XLOC_025399"; transcript_id "TCONS_00042562"; exon_number "4"; oId "CUFF.44215.1"; tss_id "TSS32104"; |
| chr19 | Cufflinks exon8773705  | 8773974  | . | + | . | gene_id "XLOC_025399"; transcript_id "TCONS_00042563"; exon_number "1"; oId "CUFF.44215.4"; tss_id "TSS32105"; |
| chr19 | Cufflinks exon8784386  | 8784435  | . | + | . | gene_id "XLOC_025399"; transcript_id "TCONS_00042563"; exon_number "2"; oId "CUFF.44215.4"; tss_id "TSS32105"; |
| chr19 | Cufflinks exon8786194  | 8793548  | . | + | . | gene_id "XLOC_025399"; transcript_id "TCONS_00042563"; exon_number "3"; oId "CUFF.44215.4"; tss_id "TSS32105"; |
| chr19 | Cufflinks exon11670209 | 11670431 | . | + | . | gene_id "XLOC_025449"; transcript_id "TCONS_00042672"; exon_number "1"; oId "CUFF.44513.2"; tss_id "TSS32177"; |
| chr19 | Cufflinks exon11674876 | 11674999 | . | + | . | gene_id "XLOC_025449"; transcript_id "TCONS_00042672"; exon_number "2"; oId "CUFF.44513.2"; tss_id "TSS32177"; |
| chr19 | Cufflinks exon11675260 | 11675307 | . | + | . | gene_id "XLOC_025449"; transcript_id "TCONS_00042672"; exon_number "3"; oId "CUFF.44513.2"; tss_id "TSS32177"; |
| chr19 | Cufflinks exon11686065 | 11686168 | . | + | . | gene_id "XLOC_025449"; transcript_id "TCONS_00042672"; exon_number "4"; oId "CUFF.44513.2"; tss_id "TSS32177"; |
| chr19 | Cufflinks exon11689227 | 11690003 | . | + | . | gene_id "XLOC_025449"; transcript_id "TCONS_00042672"; exon_number "5"; oId "CUFF.44513.2"; tss_id "TSS32177"; |
| chr19 | Cufflinks exon11670225 | 11670431 | . | + | . | gene_id "XLOC_025449"; transcript_id "TCONS_00042673"; exon_number "1"; oId "CUFF.44513.5"; tss_id "TSS32177"; |
| chr19 | Cufflinks exon11686065 | 11686168 | . | + | . | gene_id "XLOC_025449"; transcript_id "TCONS_00042673"; exon_number "2"; oId "CUFF.44513.5"; tss_id "TSS32177"; |
| chr19 | Cufflinks exon11694232 | 11694550 | . | + | . | gene_id "XLOC_025449"; transcript_id "TCONS_00042673"; exon_number "3"; oId "CUFF.44513.5"; tss_id "TSS32177"; |
| chr19 | Cufflinks exon11672875 | 11673039 | . | + | . | gene_id "XLOC_025449"; transcript_id "TCONS_00042674"; exon_number "1"; oId "CUFF.44513.7"; tss_id "TSS32178"; |
| chr19 | Cufflinks exon11674876 | 11674999 | . | + | . | gene_id "XLOC_025449"; transcript_id "TCONS_00042674"; exon_number "2"; oId "CUFF.44513.7"; tss_id "TSS32178"; |
| chr19 | Cufflinks exon11686065 | 11686168 | . | + | . | gene_id "XLOC_025449"; transcript_id "TCONS_00042674"; exon_number "3"; oId "CUFF.44513.7"; tss_id "TSS32178"; |
| chr19 | Cufflinks exon11689227 | 11690003 | . | + | . | gene_id "XLOC_025449"; transcript_id "TCONS_00042674"; exon_number "4"; oId "CUFF.44513.7"; tss_id "TSS32178"; |
| chr19 | Cufflinks exon18315540 | 18315709 | . | + | . | gene_id "XLOC_025614"; transcript_id "TCONS_00042961"; exon_number "1"; oId "CUFF.45262.1"; tss_id "TSS32377"; |
| chr19 | Cufflinks exon18316266 | 18316373 | . | + | . | gene_id "XLOC_025614"; transcript_id "TCONS_00042961"; exon_number "2"; oId "CUFF.45262.1"; tss_id "TSS32377"; |
| chr19 | Cufflinks exon19887368 | 19887803 | . | + | . | gene_id "XLOC_025655"; transcript_id "TCONS_00043031"; exon_number "1"; oId "CUFF.45409.1"; tss_id "TSS32426"; |
| chr19 | Cufflinks exon19897418 | 19897500 | . | + | . | gene_id "XLOC_025655"; transcript_id "TCONS_00043031"; exon_number "2"; oId "CUFF.45409.1"; tss_id "TSS32426"; |
| chr19 | Cufflinks exon19917090 | 19918073 | . | + | . | gene_id "XLOC_025655"; transcript_id "TCONS_00043031"; exon_number "3"; oId "CUFF.45409.1"; tss_id "TSS32426"; |
| chr19 | Cufflinks exon19887372 | 19887803 | . | + | . | gene_id "XLOC_025655"; transcript_id "TCONS_00043032"; exon_number                                             |

|                                             |   |   |   |                                                                    |  |
|---------------------------------------------|---|---|---|--------------------------------------------------------------------|--|
| "1"; oId "CUFF.45409.3"; tss_id "TSS32426"; |   |   |   |                                                                    |  |
| chr19 Cufflinks exon19897418 19898169       | . | + | . | gene_id "XLOC_025655"; transcript_id "TCONS_00043032"; exon_number |  |
| "2"; oId "CUFF.45409.3"; tss_id "TSS32426"; |   |   |   |                                                                    |  |
| chr19 Cufflinks exon19887372 19887803       | . | + | . | gene_id "XLOC_025655"; transcript_id "TCONS_00043033"; exon_number |  |
| "1"; oId "CUFF.45409.2"; tss_id "TSS32426"; |   |   |   |                                                                    |  |
| chr19 Cufflinks exon19897418 19897499       | . | + | . | gene_id "XLOC_025655"; transcript_id "TCONS_00043033"; exon_number |  |
| "2"; oId "CUFF.45409.2"; tss_id "TSS32426"; |   |   |   |                                                                    |  |
| chr19 Cufflinks exon19900491 19900630       | . | + | . | gene_id "XLOC_025655"; transcript_id "TCONS_00043033"; exon_number |  |
| "3"; oId "CUFF.45409.2"; tss_id "TSS32426"; |   |   |   |                                                                    |  |
| chr19 Cufflinks exon19917090 19918073       | . | + | . | gene_id "XLOC_025655"; transcript_id "TCONS_00043033"; exon_number |  |
| "4"; oId "CUFF.45409.2"; tss_id "TSS32426"; |   |   |   |                                                                    |  |
| chr19 Cufflinks exon20049047 20054266       | . | + | . | gene_id "XLOC_025661"; transcript_id "TCONS_00043044"; exon_number |  |
| "1"; oId "CUFF.45406.8"; tss_id "TSS32436"; |   |   |   |                                                                    |  |
| chr19 Cufflinks exon20057209 20057301       | . | + | . | gene_id "XLOC_025661"; transcript_id "TCONS_00043044"; exon_number |  |
| "2"; oId "CUFF.45406.8"; tss_id "TSS32436"; |   |   |   |                                                                    |  |
| chr19 Cufflinks exon20049854 20052579       | . | + | . | gene_id "XLOC_025661"; transcript_id "TCONS_00043045"; exon_number |  |
| "1"; oId "CUFF.45406.9"; tss_id "TSS32437"; |   |   |   |                                                                    |  |
| chr19 Cufflinks exon20053440 20054261       | . | + | . | gene_id "XLOC_025661"; transcript_id "TCONS_00043045"; exon_number |  |
| "2"; oId "CUFF.45406.9"; tss_id "TSS32437"; |   |   |   |                                                                    |  |
| chr19 Cufflinks exon20054844 20055173       | . | + | . | gene_id "XLOC_025661"; transcript_id "TCONS_00043045"; exon_number |  |
| "3"; oId "CUFF.45406.9"; tss_id "TSS32437"; |   |   |   |                                                                    |  |
| chr19 Cufflinks exon33316828 33317658       | . | + | . | gene_id "XLOC_025783"; transcript_id "TCONS_00043230"; exon_number |  |
| "1"; oId "CUFF.46082.4"; tss_id "TSS32578"; |   |   |   |                                                                    |  |
| chr19 Cufflinks exon33318103 33320451       | . | + | . | gene_id "XLOC_025783"; transcript_id "TCONS_00043230"; exon_number |  |
| "2"; oId "CUFF.46082.4"; tss_id "TSS32578"; |   |   |   |                                                                    |  |
| chr19 Cufflinks exon42636695 42636913       | . | + | . | gene_id "XLOC_026015"; transcript_id "TCONS_00043660"; exon_number |  |
| "1"; oId "CUFF.46887.1"; tss_id "TSS32873"; |   |   |   |                                                                    |  |
| chr19 Cufflinks exon42637057 42637180       | . | + | . | gene_id "XLOC_026015"; transcript_id "TCONS_00043660"; exon_number |  |
| "2"; oId "CUFF.46887.1"; tss_id "TSS32873"; |   |   |   |                                                                    |  |
| chr19 Cufflinks exon42638417 42639806       | . | + | . | gene_id "XLOC_026015"; transcript_id "TCONS_00043660"; exon_number |  |
| "3"; oId "CUFF.46887.1"; tss_id "TSS32873"; |   |   |   |                                                                    |  |
| chr19 Cufflinks exon42636695 42636913       | . | + | . | gene_id "XLOC_026015"; transcript_id "TCONS_00043661"; exon_number |  |
| "1"; oId "CUFF.46887.2"; tss_id "TSS32873"; |   |   |   |                                                                    |  |
| chr19 Cufflinks exon42637057 42637180       | . | + | . | gene_id "XLOC_026015"; transcript_id "TCONS_00043661"; exon_number |  |
| "2"; oId "CUFF.46887.2"; tss_id "TSS32873"; |   |   |   |                                                                    |  |
| chr19 Cufflinks exon42659859 42661653       | . | + | . | gene_id "XLOC_026015"; transcript_id "TCONS_00043661"; exon_number |  |
| "3"; oId "CUFF.46887.2"; tss_id "TSS32873"; |   |   |   |                                                                    |  |
| chr19 Cufflinks exon42636771 42636913       | . | + | . | gene_id "XLOC_026015"; transcript_id "TCONS_00043662"; exon_number |  |
| "1"; oId "CUFF.46887.3"; tss_id "TSS32873"; |   |   |   |                                                                    |  |
| chr19 Cufflinks exon42637057 42637180       | . | + | . | gene_id "XLOC_026015"; transcript_id "TCONS_00043662"; exon_number |  |
| "2"; oId "CUFF.46887.3"; tss_id "TSS32873"; |   |   |   |                                                                    |  |
| chr19 Cufflinks exon42638175 42638303       | . | + | . | gene_id "XLOC_026015"; transcript_id "TCONS_00043662"; exon_number |  |
| "3"; oId "CUFF.46887.3"; tss_id "TSS32873"; |   |   |   |                                                                    |  |

|       |                |          |          |   |   |   |                                                                                                                |
|-------|----------------|----------|----------|---|---|---|----------------------------------------------------------------------------------------------------------------|
| chr19 | Cufflinks exon | 42638417 | 42639806 | . | + | . | gene_id "XLOC_026015"; transcript_id "TCONS_00043662"; exon_number "4"; oId "CUFF.46887.3"; tss_id "TSS32873"; |
| chr19 | Cufflinks exon | 42636781 | 42636913 | . | + | . | gene_id "XLOC_026015"; transcript_id "TCONS_00043663"; exon_number "1"; oId "CUFF.46887.4"; tss_id "TSS32873"; |
| chr19 | Cufflinks exon | 42637057 | 42637180 | . | + | . | gene_id "XLOC_026015"; transcript_id "TCONS_00043663"; exon_number "2"; oId "CUFF.46887.4"; tss_id "TSS32873"; |
| chr19 | Cufflinks exon | 42640824 | 42641251 | . | + | . | gene_id "XLOC_026015"; transcript_id "TCONS_00043663"; exon_number "3"; oId "CUFF.46887.4"; tss_id "TSS32873"; |
| chr19 | Cufflinks exon | 42636781 | 42636913 | . | + | . | gene_id "XLOC_026015"; transcript_id "TCONS_00043664"; exon_number "1"; oId "CUFF.46887.5"; tss_id "TSS32873"; |
| chr19 | Cufflinks exon | 42637057 | 42637180 | . | + | . | gene_id "XLOC_026015"; transcript_id "TCONS_00043664"; exon_number "2"; oId "CUFF.46887.5"; tss_id "TSS32873"; |
| chr19 | Cufflinks exon | 42640824 | 42641039 | . | + | . | gene_id "XLOC_026015"; transcript_id "TCONS_00043664"; exon_number "3"; oId "CUFF.46887.5"; tss_id "TSS32873"; |
| chr19 | Cufflinks exon | 42643094 | 42643128 | . | + | . | gene_id "XLOC_026015"; transcript_id "TCONS_00043664"; exon_number "4"; oId "CUFF.46887.5"; tss_id "TSS32873"; |
| chr19 | Cufflinks exon | 42927907 | 42929356 | . | + | . | gene_id "XLOC_026026"; transcript_id "TCONS_00043688"; exon_number "1"; oId "CUFF.46912.1"; tss_id "TSS32888"; |
| chr19 | Cufflinks exon | 43155239 | 43156507 | . | + | . | gene_id "XLOC_026026"; transcript_id "TCONS_00043688"; exon_number "2"; oId "CUFF.46912.1"; tss_id "TSS32888"; |
| chr19 | Cufflinks exon | 46522384 | 46526687 | . | + | . | gene_id "XLOC_026099"; transcript_id "TCONS_00043838"; exon_number "1"; oId "CUFF.47179.1"; tss_id "TSS32975"; |
| chr19 | Cufflinks exon | 46531150 | 46531301 | . | + | . | gene_id "XLOC_026099"; transcript_id "TCONS_00043838"; exon_number "2"; oId "CUFF.47179.1"; tss_id "TSS32975"; |
| chr19 | Cufflinks exon | 46531405 | 46533217 | . | + | . | gene_id "XLOC_026099"; transcript_id "TCONS_00043838"; exon_number "3"; oId "CUFF.47179.1"; tss_id "TSS32975"; |
| chr19 | Cufflinks exon | 46522403 | 46526687 | . | + | . | gene_id "XLOC_026099"; transcript_id "TCONS_00043839"; exon_number "1"; oId "CUFF.47179.3"; tss_id "TSS32975"; |
| chr19 | Cufflinks exon | 46531150 | 46531301 | . | + | . | gene_id "XLOC_026099"; transcript_id "TCONS_00043839"; exon_number "2"; oId "CUFF.47179.3"; tss_id "TSS32975"; |
| chr19 | Cufflinks exon | 46531405 | 46531515 | . | + | . | gene_id "XLOC_026099"; transcript_id "TCONS_00043839"; exon_number "3"; oId "CUFF.47179.3"; tss_id "TSS32975"; |
| chr19 | Cufflinks exon | 46532589 | 46533217 | . | + | . | gene_id "XLOC_026099"; transcript_id "TCONS_00043839"; exon_number "4"; oId "CUFF.47179.3"; tss_id "TSS32975"; |
| chr19 | Cufflinks exon | 46522403 | 46526687 | . | + | . | gene_id "XLOC_026099"; transcript_id "TCONS_00043840"; exon_number "1"; oId "CUFF.47179.5"; tss_id "TSS32975"; |
| chr19 | Cufflinks exon | 46531150 | 46531301 | . | + | . | gene_id "XLOC_026099"; transcript_id "TCONS_00043840"; exon_number "2"; oId "CUFF.47179.5"; tss_id "TSS32975"; |
| chr19 | Cufflinks exon | 46531405 | 46531516 | . | + | . | gene_id "XLOC_026099"; transcript_id "TCONS_00043840"; exon_number "3"; oId "CUFF.47179.5"; tss_id "TSS32975"; |
| chr19 | Cufflinks exon | 46540397 | 46542384 | . | + | . | gene_id "XLOC_026099"; transcript_id "TCONS_00043840"; exon_number "4"; oId "CUFF.47179.5"; tss_id "TSS32975"; |
| chr19 | Cufflinks exon | 46522403 | 46526687 | . | + | . | gene_id "XLOC_026099"; transcript_id "TCONS_00043841"; exon_number                                             |

|                                             |   |   |   |                                                                    |  |
|---------------------------------------------|---|---|---|--------------------------------------------------------------------|--|
| "1"; oId "CUFF.47179.6"; tss_id "TSS32975"; |   |   |   |                                                                    |  |
| chr19 Cufflinks exon46531177 46531301       | . | + | . | gene_id "XLOC_026099"; transcript_id "TCONS_00043841"; exon_number |  |
| "2"; oId "CUFF.47179.6"; tss_id "TSS32975"; |   |   |   |                                                                    |  |
| chr19 Cufflinks exon46531405 46531516       | . | + | . | gene_id "XLOC_026099"; transcript_id "TCONS_00043841"; exon_number |  |
| "3"; oId "CUFF.47179.6"; tss_id "TSS32975"; |   |   |   |                                                                    |  |
| chr19 Cufflinks exon46545284 46545494       | . | + | . | gene_id "XLOC_026099"; transcript_id "TCONS_00043841"; exon_number |  |
| "4"; oId "CUFF.47179.6"; tss_id "TSS32975"; |   |   |   |                                                                    |  |
| chr19 Cufflinks exon46525368 46526687       | . | + | . | gene_id "XLOC_026099"; transcript_id "TCONS_00043842"; exon_number |  |
| "1"; oId "CUFF.47179.8"; tss_id "TSS32976"; |   |   |   |                                                                    |  |
| chr19 Cufflinks exon46545284 46545494       | . | + | . | gene_id "XLOC_026099"; transcript_id "TCONS_00043842"; exon_number |  |
| "2"; oId "CUFF.47179.8"; tss_id "TSS32976"; |   |   |   |                                                                    |  |
| chr19 Cufflinks exon48824733 48824776       | . | + | . | gene_id "XLOC_026134"; transcript_id "TCONS_00043908"; exon_number |  |
| "1"; oId "CUFF.47331.2"; tss_id "TSS33029"; |   |   |   |                                                                    |  |
| chr19 Cufflinks exon48825071 48827120       | . | + | . | gene_id "XLOC_026134"; transcript_id "TCONS_00043908"; exon_number |  |
| "2"; oId "CUFF.47331.2"; tss_id "TSS33029"; |   |   |   |                                                                    |  |
| chr19 Cufflinks exon49223238 49224181       | . | + | . | gene_id "XLOC_026149"; transcript_id "TCONS_00043933"; exon_number |  |
| "1"; oId "CUFF.47392.2"; tss_id "TSS33048"; |   |   |   |                                                                    |  |
| chr19 Cufflinks exon49227956 49228104       | . | + | . | gene_id "XLOC_026149"; transcript_id "TCONS_00043933"; exon_number |  |
| "2"; oId "CUFF.47392.2"; tss_id "TSS33048"; |   |   |   |                                                                    |  |
| chr19 Cufflinks exon49231464 49231625       | . | + | . | gene_id "XLOC_026149"; transcript_id "TCONS_00043933"; exon_number |  |
| "3"; oId "CUFF.47392.2"; tss_id "TSS33048"; |   |   |   |                                                                    |  |
| chr19 Cufflinks exon49234133 49234389       | . | + | . | gene_id "XLOC_026149"; transcript_id "TCONS_00043933"; exon_number |  |
| "4"; oId "CUFF.47392.2"; tss_id "TSS33048"; |   |   |   |                                                                    |  |
| chr19 Cufflinks exon49234523 49235495       | . | + | . | gene_id "XLOC_026149"; transcript_id "TCONS_00043933"; exon_number |  |
| "5"; oId "CUFF.47392.2"; tss_id "TSS33048"; |   |   |   |                                                                    |  |
| chr19 Cufflinks exon49223238 49224181       | . | + | . | gene_id "XLOC_026149"; transcript_id "TCONS_00043932"; exon_number |  |
| "1"; oId "CUFF.47392.1"; tss_id "TSS33048"; |   |   |   |                                                                    |  |
| chr19 Cufflinks exon49227956 49228104       | . | + | . | gene_id "XLOC_026149"; transcript_id "TCONS_00043932"; exon_number |  |
| "2"; oId "CUFF.47392.1"; tss_id "TSS33048"; |   |   |   |                                                                    |  |
| chr19 Cufflinks exon49231464 49231625       | . | + | . | gene_id "XLOC_026149"; transcript_id "TCONS_00043932"; exon_number |  |
| "3"; oId "CUFF.47392.1"; tss_id "TSS33048"; |   |   |   |                                                                    |  |
| chr19 Cufflinks exon49234523 49235495       | . | + | . | gene_id "XLOC_026149"; transcript_id "TCONS_00043932"; exon_number |  |
| "4"; oId "CUFF.47392.1"; tss_id "TSS33048"; |   |   |   |                                                                    |  |
| chr19 Cufflinks exon49223238 49224181       | . | + | . | gene_id "XLOC_026149"; transcript_id "TCONS_00043934"; exon_number |  |
| "1"; oId "CUFF.47392.3"; tss_id "TSS33048"; |   |   |   |                                                                    |  |
| chr19 Cufflinks exon49227956 49228104       | . | + | . | gene_id "XLOC_026149"; transcript_id "TCONS_00043934"; exon_number |  |
| "2"; oId "CUFF.47392.3"; tss_id "TSS33048"; |   |   |   |                                                                    |  |
| chr19 Cufflinks exon49231464 49231625       | . | + | . | gene_id "XLOC_026149"; transcript_id "TCONS_00043934"; exon_number |  |
| "3"; oId "CUFF.47392.3"; tss_id "TSS33048"; |   |   |   |                                                                    |  |
| chr19 Cufflinks exon49241750 49241955       | . | + | . | gene_id "XLOC_026149"; transcript_id "TCONS_00043934"; exon_number |  |
| "4"; oId "CUFF.47392.3"; tss_id "TSS33048"; |   |   |   |                                                                    |  |
| chr19 Cufflinks exon49519496 49519513       | . | + | . | gene_id "XLOC_026162"; transcript_id "TCONS_00043960"; exon_number |  |
| "1"; oId "CUFF.47426.2"; tss_id "TSS33064"; |   |   |   |                                                                    |  |



|       |                        |          |   |   |   |                                                                                                                |
|-------|------------------------|----------|---|---|---|----------------------------------------------------------------------------------------------------------------|
| chr19 | Cufflinks exon49519795 | 49523533 | . | + | . | gene_id "XLOC_026162"; transcript_id "TCONS_00043960"; exon_number "2"; oId "CUFF.47426.2"; tss_id "TSS33064"; |
| chr19 | Cufflinks exon50861982 | 50863044 | . | + | . | gene_id "XLOC_026209"; transcript_id "TCONS_00044041"; exon_number "1"; oId "CUFF.47563.2"; tss_id "TSS33118"; |
| chr19 | Cufflinks exon50874612 | 50874680 | . | + | . | gene_id "XLOC_026209"; transcript_id "TCONS_00044041"; exon_number "2"; oId "CUFF.47563.2"; tss_id "TSS33118"; |
| chr19 | Cufflinks exon51873612 | 51874465 | . | + | . | gene_id "XLOC_026240"; transcript_id "TCONS_00044091"; exon_number "1"; oId "CUFF.47650.2"; tss_id "TSS33157"; |
| chr19 | Cufflinks exon51876148 | 51876206 | . | + | . | gene_id "XLOC_026240"; transcript_id "TCONS_00044091"; exon_number "2"; oId "CUFF.47650.2"; tss_id "TSS33157"; |
| chr19 | Cufflinks exon51876749 | 51877139 | . | + | . | gene_id "XLOC_026240"; transcript_id "TCONS_00044091"; exon_number "3"; oId "CUFF.47650.2"; tss_id "TSS33157"; |
| chr19 | Cufflinks exon52097741 | 52097899 | . | + | . | gene_id "XLOC_026249"; transcript_id "TCONS_00044110"; exon_number "1"; oId "CUFF.47683.1"; tss_id "TSS33172"; |
| chr19 | Cufflinks exon52104464 | 52105046 | . | + | . | gene_id "XLOC_026249"; transcript_id "TCONS_00044110"; exon_number "2"; oId "CUFF.47683.1"; tss_id "TSS33172"; |
| chr19 | Cufflinks exon54663614 | 54667568 | . | + | . | gene_id "XLOC_026310"; transcript_id "TCONS_00044227"; exon_number "1"; oId "CUFF.47951.1"; tss_id "TSS33256"; |
| chr19 | Cufflinks exon54671356 | 54671949 | . | + | . | gene_id "XLOC_026310"; transcript_id "TCONS_00044227"; exon_number "2"; oId "CUFF.47951.1"; tss_id "TSS33256"; |
| chr19 | Cufflinks exon54674411 | 54674508 | . | + | . | gene_id "XLOC_026310"; transcript_id "TCONS_00044227"; exon_number "3"; oId "CUFF.47951.1"; tss_id "TSS33256"; |
| chr19 | Cufflinks exon54675359 | 54676986 | . | + | . | gene_id "XLOC_026310"; transcript_id "TCONS_00044227"; exon_number "4"; oId "CUFF.47951.1"; tss_id "TSS33256"; |
| chr19 | Cufflinks exon54888154 | 54888750 | . | + | . | gene_id "XLOC_026324"; transcript_id "TCONS_00044244"; exon_number "1"; oId "CUFF.47993.1"; tss_id "TSS33272"; |
| chr19 | Cufflinks exon54890986 | 54891232 | . | + | . | gene_id "XLOC_026324"; transcript_id "TCONS_00044244"; exon_number "2"; oId "CUFF.47993.1"; tss_id "TSS33272"; |
| chr19 | Cufflinks exon56905045 | 56905422 | . | + | . | gene_id "XLOC_026391"; transcript_id "TCONS_00044366"; exon_number "1"; oId "CUFF.48201.2"; tss_id "TSS33357"; |
| chr19 | Cufflinks exon56905586 | 56905810 | . | + | . | gene_id "XLOC_026391"; transcript_id "TCONS_00044366"; exon_number "2"; oId "CUFF.48201.2"; tss_id "TSS33357"; |
| chr19 | Cufflinks exon56909250 | 56909417 | . | + | . | gene_id "XLOC_026391"; transcript_id "TCONS_00044366"; exon_number "3"; oId "CUFF.48201.2"; tss_id "TSS33357"; |
| chr19 | Cufflinks exon56909646 | 56909752 | . | + | . | gene_id "XLOC_026391"; transcript_id "TCONS_00044366"; exon_number "4"; oId "CUFF.48201.2"; tss_id "TSS33357"; |
| chr19 | Cufflinks exon56910263 | 56910550 | . | + | . | gene_id "XLOC_026391"; transcript_id "TCONS_00044366"; exon_number "5"; oId "CUFF.48201.2"; tss_id "TSS33357"; |
| chr19 | Cufflinks exon56988810 | 56989750 | . | + | . | gene_id "XLOC_026395"; transcript_id "TCONS_00044372"; exon_number "1"; oId "CUFF.48207.1"; tss_id "TSS33362"; |
| chr19 | Cufflinks exon57005532 | 57005711 | . | + | . | gene_id "XLOC_026395"; transcript_id "TCONS_00044372"; exon_number "2"; oId "CUFF.48207.1"; tss_id "TSS33362"; |
| chr19 | Cufflinks exon57006416 | 57006805 | . | + | . | gene_id "XLOC_026395"; transcript_id "TCONS_00044372"; exon_number "3"; oId "CUFF.48207.1"; tss_id "TSS33362"; |

"3"; oId "CUFF.48207.1"; tss\_id "TSS33362";  
chr19 Cufflinks exon57988991 57989454 . + . gene\_id "XLOC\_026420"; transcript\_id "TCONS\_00044410"; exon\_number  
"1"; oId "CUFF.48291.1"; tss\_id "TSS33388";  
chr19 Cufflinks exon57993273 57993578 . + . gene\_id "XLOC\_026420"; transcript\_id "TCONS\_00044410"; exon\_number  
"2"; oId "CUFF.48291.1"; tss\_id "TSS33388";  
chr19 Cufflinks exon57988991 57989454 . + . gene\_id "XLOC\_026420"; transcript\_id "TCONS\_00044411"; exon\_number  
"1"; oId "CUFF.48291.2"; tss\_id "TSS33388";  
chr19 Cufflinks exon57994264 57994303 . + . gene\_id "XLOC\_026420"; transcript\_id "TCONS\_00044411"; exon\_number  
"2"; oId "CUFF.48291.2"; tss\_id "TSS33388";  
chr19 Cufflinks exon58892866 58894484 . + . gene\_id "XLOC\_026476"; transcript\_id "TCONS\_00044526"; exon\_number  
"1"; oId "CUFF.48511.2"; tss\_id "TSS33460";  
chr19 Cufflinks exon58897662 58897989 . + . gene\_id "XLOC\_026476"; transcript\_id "TCONS\_00044526"; exon\_number  
"2"; oId "CUFF.48511.2"; tss\_id "TSS33460";  
chr19 Cufflinks exon58898399 58898538 . + . gene\_id "XLOC\_026476"; transcript\_id "TCONS\_00044526"; exon\_number  
"3"; oId "CUFF.48511.2"; tss\_id "TSS33460";  
chr19 Cufflinks exon58896002 58896363 . + . gene\_id "XLOC\_026476"; transcript\_id "TCONS\_00044527"; exon\_number  
"1"; oId "CUFF.48511.3"; tss\_id "TSS33461";  
chr19 Cufflinks exon58897662 58897989 . + . gene\_id "XLOC\_026476"; transcript\_id "TCONS\_00044527"; exon\_number  
"2"; oId "CUFF.48511.3"; tss\_id "TSS33461";  
chr19 Cufflinks exon58898549 58898559 . + . gene\_id "XLOC\_026476"; transcript\_id "TCONS\_00044527"; exon\_number  
"3"; oId "CUFF.48511.3"; tss\_id "TSS33461";  
chr19 Cufflinks exon59070553 59070776 . + . gene\_id "XLOC\_026493"; transcript\_id "TCONS\_00044554"; exon\_number  
"1"; oId "CUFF.48551.1"; tss\_id "TSS33485";  
chr19 Cufflinks exon59080280 59080362 . + . gene\_id "XLOC\_026493"; transcript\_id "TCONS\_00044554"; exon\_number  
"2"; oId "CUFF.48551.1"; tss\_id "TSS33485";  
chr19 Cufflinks exon59081751 59081824 . + . gene\_id "XLOC\_026493"; transcript\_id "TCONS\_00044554"; exon\_number  
"3"; oId "CUFF.48551.1"; tss\_id "TSS33485";  
chr19 Cufflinks exon59083225 59083322 . + . gene\_id "XLOC\_026493"; transcript\_id "TCONS\_00044554"; exon\_number  
"4"; oId "CUFF.48551.1"; tss\_id "TSS33485";  
chr19 Cufflinks exon59083945 59084190 . + . gene\_id "XLOC\_026493"; transcript\_id "TCONS\_00044554"; exon\_number  
"5"; oId "CUFF.48551.1"; tss\_id "TSS33485";  
chr19 Cufflinks exon59084284 59086164 . + . gene\_id "XLOC\_026493"; transcript\_id "TCONS\_00044554"; exon\_number  
"6"; oId "CUFF.48551.1"; tss\_id "TSS33485";  
chr19 Cufflinks exon787116 787138 . - . gene\_id "XLOC\_026531"; transcript\_id "TCONS\_00044603"; exon\_number "1"; oId  
"CUFF.43562.1"; tss\_id "TSS33528";  
chr19 Cufflinks exon794440 797144 . - . gene\_id "XLOC\_026531"; transcript\_id "TCONS\_00044603"; exon\_number "2"; oId  
"CUFF.43562.1"; tss\_id "TSS33528";  
chr19 Cufflinks exon1267470 1268389 . - . gene\_id "XLOC\_026543"; transcript\_id "TCONS\_00044617"; exon\_number "1"; oId  
"CUFF.43598.1"; tss\_id "TSS33541";  
chr19 Cufflinks exon1269824 1270259 . - . gene\_id "XLOC\_026543"; transcript\_id "TCONS\_00044617"; exon\_number "2"; oId  
"CUFF.43598.1"; tss\_id "TSS33541";  
chr19 Cufflinks exon2727748 2729126 . - . gene\_id "XLOC\_026587"; transcript\_id "TCONS\_00044670"; exon\_number "1"; oId  
"CUFF.43717.1"; tss\_id "TSS33592";

|       |                |         |         |   |   |   |                                                                                                                |
|-------|----------------|---------|---------|---|---|---|----------------------------------------------------------------------------------------------------------------|
| chr19 | Cufflinks exon | 2731212 | 2731457 | . | - | . | gene_id "XLOC_026587"; transcript_id "TCONS_00044670"; exon_number "2"; oId "CUFF.43717.1"; tss_id "TSS33592"; |
| chr19 | Cufflinks exon | 2731528 | 2732080 | . | - | . | gene_id "XLOC_026587"; transcript_id "TCONS_00044670"; exon_number "3"; oId "CUFF.43717.1"; tss_id "TSS33592"; |
| chr19 | Cufflinks exon | 2926661 | 2927303 | . | - | . | gene_id "XLOC_026595"; transcript_id "TCONS_00044680"; exon_number "1"; oId "CUFF.43747.1"; tss_id "TSS33601"; |
| chr19 | Cufflinks exon | 2927388 | 2927764 | . | - | . | gene_id "XLOC_026595"; transcript_id "TCONS_00044680"; exon_number "2"; oId "CUFF.43747.1"; tss_id "TSS33601"; |
| chr19 | Cufflinks exon | 3117124 | 3119030 | . | - | . | gene_id "XLOC_026601"; transcript_id "TCONS_00044698"; exon_number "1"; oId "CUFF.43770.5"; tss_id "TSS33615"; |
| chr19 | Cufflinks exon | 3119252 | 3119302 | . | - | . | gene_id "XLOC_026601"; transcript_id "TCONS_00044698"; exon_number "2"; oId "CUFF.43770.5"; tss_id "TSS33615"; |
| chr19 | Cufflinks exon | 3121077 | 3121282 | . | - | . | gene_id "XLOC_026601"; transcript_id "TCONS_00044698"; exon_number "3"; oId "CUFF.43770.5"; tss_id "TSS33615"; |
| chr19 | Cufflinks exon | 3121394 | 3121450 | . | - | . | gene_id "XLOC_026601"; transcript_id "TCONS_00044698"; exon_number "4"; oId "CUFF.43770.5"; tss_id "TSS33615"; |
| chr19 | Cufflinks exon | 3124310 | 3124406 | . | - | . | gene_id "XLOC_026601"; transcript_id "TCONS_00044698"; exon_number "5"; oId "CUFF.43770.5"; tss_id "TSS33615"; |
| chr19 | Cufflinks exon | 3124596 | 3124863 | . | - | . | gene_id "XLOC_026601"; transcript_id "TCONS_00044698"; exon_number "6"; oId "CUFF.43770.5"; tss_id "TSS33615"; |
| chr19 | Cufflinks exon | 3125606 | 3127097 | . | - | . | gene_id "XLOC_026601"; transcript_id "TCONS_00044698"; exon_number "7"; oId "CUFF.43770.5"; tss_id "TSS33615"; |
| chr19 | Cufflinks exon | 3117124 | 3119030 | . | - | . | gene_id "XLOC_026601"; transcript_id "TCONS_00044697"; exon_number "1"; oId "CUFF.43770.2"; tss_id "TSS33615"; |
| chr19 | Cufflinks exon | 3119252 | 3119299 | . | - | . | gene_id "XLOC_026601"; transcript_id "TCONS_00044697"; exon_number "2"; oId "CUFF.43770.2"; tss_id "TSS33615"; |
| chr19 | Cufflinks exon | 3121077 | 3121282 | . | - | . | gene_id "XLOC_026601"; transcript_id "TCONS_00044697"; exon_number "3"; oId "CUFF.43770.2"; tss_id "TSS33615"; |
| chr19 | Cufflinks exon | 3121394 | 3121452 | . | - | . | gene_id "XLOC_026601"; transcript_id "TCONS_00044697"; exon_number "4"; oId "CUFF.43770.2"; tss_id "TSS33615"; |
| chr19 | Cufflinks exon | 3123536 | 3123702 | . | - | . | gene_id "XLOC_026601"; transcript_id "TCONS_00044697"; exon_number "5"; oId "CUFF.43770.2"; tss_id "TSS33615"; |
| chr19 | Cufflinks exon | 3124310 | 3124406 | . | - | . | gene_id "XLOC_026601"; transcript_id "TCONS_00044697"; exon_number "6"; oId "CUFF.43770.2"; tss_id "TSS33615"; |
| chr19 | Cufflinks exon | 3124596 | 3124863 | . | - | . | gene_id "XLOC_026601"; transcript_id "TCONS_00044697"; exon_number "7"; oId "CUFF.43770.2"; tss_id "TSS33615"; |
| chr19 | Cufflinks exon | 3125606 | 3127097 | . | - | . | gene_id "XLOC_026601"; transcript_id "TCONS_00044697"; exon_number "8"; oId "CUFF.43770.2"; tss_id "TSS33615"; |
| chr19 | Cufflinks exon | 3117124 | 3119030 | . | - | . | gene_id "XLOC_026601"; transcript_id "TCONS_00044700"; exon_number "1"; oId "CUFF.43770.4"; tss_id "TSS33615"; |
| chr19 | Cufflinks exon | 3119252 | 3119302 | . | - | . | gene_id "XLOC_026601"; transcript_id "TCONS_00044700"; exon_number "2"; oId "CUFF.43770.4"; tss_id "TSS33615"; |
| chr19 | Cufflinks exon | 3121077 | 3121282 | . | - | . | gene_id "XLOC_026601"; transcript_id "TCONS_00044700"; exon_number "3"; oId "CUFF.43770.4"; tss_id "TSS33615"; |

"CUFF.43770.4"; tss\_id "TSS33615";  
chr19 Cufflinks exon3121394 3121450 . - . gene\_id "XLOC\_026601"; transcript\_id "TCONS\_00044700"; exon\_number "4"; oId  
"CUFF.43770.4"; tss\_id "TSS33615";  
chr19 Cufflinks exon3124310 3124406 . - . gene\_id "XLOC\_026601"; transcript\_id "TCONS\_00044700"; exon\_number "5"; oId  
"CUFF.43770.4"; tss\_id "TSS33615";  
chr19 Cufflinks exon3124596 3124864 . - . gene\_id "XLOC\_026601"; transcript\_id "TCONS\_00044700"; exon\_number "6"; oId  
"CUFF.43770.4"; tss\_id "TSS33615";  
chr19 Cufflinks exon3125607 3127149 . - . gene\_id "XLOC\_026601"; transcript\_id "TCONS\_00044700"; exon\_number "7"; oId  
"CUFF.43770.4"; tss\_id "TSS33615";  
chr19 Cufflinks exon3117124 3119030 . - . gene\_id "XLOC\_026601"; transcript\_id "TCONS\_00044699"; exon\_number "1"; oId  
"CUFF.43770.3"; tss\_id "TSS33615";  
chr19 Cufflinks exon3119252 3119299 . - . gene\_id "XLOC\_026601"; transcript\_id "TCONS\_00044699"; exon\_number "2"; oId  
"CUFF.43770.3"; tss\_id "TSS33615";  
chr19 Cufflinks exon3121077 3121282 . - . gene\_id "XLOC\_026601"; transcript\_id "TCONS\_00044699"; exon\_number "3"; oId  
"CUFF.43770.3"; tss\_id "TSS33615";  
chr19 Cufflinks exon3121394 3121450 . - . gene\_id "XLOC\_026601"; transcript\_id "TCONS\_00044699"; exon\_number "4"; oId  
"CUFF.43770.3"; tss\_id "TSS33615";  
chr19 Cufflinks exon3124310 3124406 . - . gene\_id "XLOC\_026601"; transcript\_id "TCONS\_00044699"; exon\_number "5"; oId  
"CUFF.43770.3"; tss\_id "TSS33615";  
chr19 Cufflinks exon3124596 3124864 . - . gene\_id "XLOC\_026601"; transcript\_id "TCONS\_00044699"; exon\_number "6"; oId  
"CUFF.43770.3"; tss\_id "TSS33615";  
chr19 Cufflinks exon3125607 3127149 . - . gene\_id "XLOC\_026601"; transcript\_id "TCONS\_00044699"; exon\_number "7"; oId  
"CUFF.43770.3"; tss\_id "TSS33615";  
chr19 Cufflinks exon 4086278 4089072 . - . gene\_id "XLOC\_026634"; transcript\_id "TCONS\_00044756"; exon\_number "1"; oId  
"CUFF.43887.2"; tss\_id "TSS33663";  
chr19 Cufflinks exon 4089484 4090260 . - . gene\_id "XLOC\_026634"; transcript\_id "TCONS\_00044756"; exon\_number "2"; oId  
"CUFF.43887.2"; tss\_id "TSS33663";  
chr19 Cufflinks exon 4086278 4089085 . - . gene\_id "XLOC\_026634"; transcript\_id "TCONS\_00044755"; exon\_number "1"; oId  
"CUFF.43887.1"; tss\_id "TSS33663";  
chr19 Cufflinks exon 4089497 4090260 . - . gene\_id "XLOC\_026634"; transcript\_id "TCONS\_00044755"; exon\_number "2"; oId  
"CUFF.43887.1"; tss\_id "TSS33663";  
chr19 Cufflinks exon 4780627 4780673 . - . gene\_id "XLOC\_026652"; transcript\_id "TCONS\_00044788"; exon\_number "1"; oId  
"CUFF.43937.1"; tss\_id "TSS33686";  
chr19 Cufflinks exon 4785171 4785539 . - . gene\_id "XLOC\_026652"; transcript\_id "TCONS\_00044788"; exon\_number "2"; oId  
"CUFF.43937.1"; tss\_id "TSS33686";  
chr19 Cufflinks exon 4791210 4791636 . - . gene\_id "XLOC\_026652"; transcript\_id "TCONS\_00044788"; exon\_number "3"; oId  
"CUFF.43937.1"; tss\_id "TSS33686";  
chr19 Cufflinks exon 5558178 5561410 . - . gene\_id "XLOC\_026658"; transcript\_id "TCONS\_00044801"; exon\_number "1"; oId  
"CUFF.43961.2"; tss\_id "TSS33693";  
chr19 Cufflinks exon 5562093 5562222 . - . gene\_id "XLOC\_026658"; transcript\_id "TCONS\_00044801"; exon\_number "2"; oId  
"CUFF.43961.2"; tss\_id "TSS33693";  
chr19 Cufflinks exon 5567676 5568045 . - . gene\_id "XLOC\_026658"; transcript\_id "TCONS\_00044801"; exon\_number "3"; oId  
"CUFF.43961.2"; tss\_id "TSS33693";

chr19 Cufflinks exon 5558178 5561410 . - . gene\_id "XLOC\_026658"; transcript\_id "TCONS\_00044802"; exon\_number "1"; oId "CUFF.43961.1"; tss\_id "TSS33694";

chr19 Cufflinks exon 5562093 5562222 . - . gene\_id "XLOC\_026658"; transcript\_id "TCONS\_00044802"; exon\_number "2"; oId "CUFF.43961.1"; tss\_id "TSS33694";

chr19 Cufflinks exon 5578171 5578244 . - . gene\_id "XLOC\_026658"; transcript\_id "TCONS\_00044802"; exon\_number "3"; oId "CUFF.43961.1"; tss\_id "TSS33694";

chr19 Cufflinks exon 8439260 8439492 . - . gene\_id "XLOC\_026723"; transcript\_id "TCONS\_00044932"; exon\_number "1"; oId "CUFF.44184.1"; tss\_id "TSS33780";

chr19 Cufflinks exon 8441846 8441951 . - . gene\_id "XLOC\_026723"; transcript\_id "TCONS\_00044932"; exon\_number "2"; oId "CUFF.44184.1"; tss\_id "TSS33780";

chr19 Cufflinks exon 8454893 8455575 . - . gene\_id "XLOC\_026723"; transcript\_id "TCONS\_00044932"; exon\_number "3"; oId "CUFF.44184.1"; tss\_id "TSS33780";

chr19 Cufflinks exon 14182299 14184193 . - . gene\_id "XLOC\_026858"; transcript\_id "TCONS\_00045192"; exon\_number "1"; oId "CUFF.44905.2"; tss\_id "TSS33961";

chr19 Cufflinks exon 14184842 14185678 . - . gene\_id "XLOC\_026858"; transcript\_id "TCONS\_00045192"; exon\_number "2"; oId "CUFF.44905.2"; tss\_id "TSS33961";

chr19 Cufflinks exon 15401874 15403421 . - . gene\_id "XLOC\_026890"; transcript\_id "TCONS\_00045252"; exon\_number "1"; oId "CUFF.44992.1"; tss\_id "TSS34010";

chr19 Cufflinks exon 15499559 15499649 . - . gene\_id "XLOC\_026890"; transcript\_id "TCONS\_00045252"; exon\_number "2"; oId "CUFF.44992.1"; tss\_id "TSS34010";

chr19 Cufflinks exon 15573685 15573697 . - . gene\_id "XLOC\_026890"; transcript\_id "TCONS\_00045252"; exon\_number "3"; oId "CUFF.44992.1"; tss\_id "TSS34010";

chr19 Cufflinks exon 20105947 20106549 . - . gene\_id "XLOC\_027009"; transcript\_id "TCONS\_00045458"; exon\_number "1"; oId "CUFF.45446.3"; tss\_id "TSS34158";

chr19 Cufflinks exon 20111060 20113693 . - . gene\_id "XLOC\_027009"; transcript\_id "TCONS\_00045458"; exon\_number "2"; oId "CUFF.45446.3"; tss\_id "TSS34158";

chr19 Cufflinks exon 21752874 21754341 . - . gene\_id "XLOC\_027032"; transcript\_id "TCONS\_00045491"; exon\_number "1"; oId "CUFF.45671.1"; tss\_id "TSS34186";

chr19 Cufflinks exon 21769665 21770729 . - . gene\_id "XLOC\_027032"; transcript\_id "TCONS\_00045491"; exon\_number "2"; oId "CUFF.45671.1"; tss\_id "TSS34186";

chr19 Cufflinks exon 28221177 28221615 . - . gene\_id "XLOC\_027067"; transcript\_id "TCONS\_00045556"; exon\_number "1"; oId "CUFF.45903.1"; tss\_id "TSS34229";

chr19 Cufflinks exon 28223704 28223875 . - . gene\_id "XLOC\_027067"; transcript\_id "TCONS\_00045556"; exon\_number "2"; oId "CUFF.45903.1"; tss\_id "TSS34229";

chr19 Cufflinks exon 28237006 28237248 . - . gene\_id "XLOC\_027067"; transcript\_id "TCONS\_00045556"; exon\_number "3"; oId "CUFF.45903.1"; tss\_id "TSS34229";

chr19 Cufflinks exon 28283908 28284848 . - . gene\_id "XLOC\_027067"; transcript\_id "TCONS\_00045556"; exon\_number "4"; oId "CUFF.45903.1"; tss\_id "TSS34229";

chr19 Cufflinks exon 28223321 28223355 . - . gene\_id "XLOC\_027067"; transcript\_id "TCONS\_00045557"; exon\_number "1"; oId "CUFF.45903.3"; tss\_id "TSS34229";

chr19 Cufflinks exon 28223704 28223875 . - . gene\_id "XLOC\_027067"; transcript\_id "TCONS\_00045557"; exon\_number "2"; oId "CUFF.45903.3"; tss\_id "TSS34229";

chr19 Cufflinks exon 28237006 28237248 . - . gene\_id "XLOC\_027067"; transcript\_id "TCONS\_00045557"; exon\_number "3"; oId "CUFF.45903.3"; tss\_id "TSS34229";

|                                              |                        |          |   |   |                                                                    |
|----------------------------------------------|------------------------|----------|---|---|--------------------------------------------------------------------|
| "3"; oId "CUFF.45903.3"; tss_id "TSS34229";  |                        |          |   |   |                                                                    |
| chr19                                        | Cufflinks exon28283908 | 28284140 | . | - | .                                                                  |
|                                              |                        |          |   |   | gene_id "XLOC_027067"; transcript_id "TCONS_00045557"; exon_number |
| "4"; oId "CUFF.45903.3"; tss_id "TSS34229";  |                        |          |   |   |                                                                    |
| chr19                                        | Cufflinks exon28284440 | 28284848 | . | - | .                                                                  |
|                                              |                        |          |   |   | gene_id "XLOC_027067"; transcript_id "TCONS_00045557"; exon_number |
| "5"; oId "CUFF.45903.3"; tss_id "TSS34229";  |                        |          |   |   |                                                                    |
| chr19                                        | Cufflinks exon28926296 | 28927722 | . | - | .                                                                  |
|                                              |                        |          |   |   | gene_id "XLOC_027078"; transcript_id "TCONS_00045573"; exon_number |
| "1"; oId "CUFF.45967.3"; tss_id "TSS34243";  |                        |          |   |   |                                                                    |
| chr19                                        | Cufflinks exon28927823 | 28928041 | . | - | .                                                                  |
|                                              |                        |          |   |   | gene_id "XLOC_027078"; transcript_id "TCONS_00045573"; exon_number |
| "2"; oId "CUFF.45967.3"; tss_id "TSS34243";  |                        |          |   |   |                                                                    |
| chr19                                        | Cufflinks exon28928392 | 28928625 | . | - | .                                                                  |
|                                              |                        |          |   |   | gene_id "XLOC_027078"; transcript_id "TCONS_00045573"; exon_number |
| "3"; oId "CUFF.45967.3"; tss_id "TSS34243";  |                        |          |   |   |                                                                    |
| chr19                                        | Cufflinks exon28952194 | 28952404 | . | - | .                                                                  |
|                                              |                        |          |   |   | gene_id "XLOC_027078"; transcript_id "TCONS_00045573"; exon_number |
| "4"; oId "CUFF.45967.3"; tss_id "TSS34243";  |                        |          |   |   |                                                                    |
| chr19                                        | Cufflinks exon28957309 | 28957687 | . | - | .                                                                  |
|                                              |                        |          |   |   | gene_id "XLOC_027078"; transcript_id "TCONS_00045573"; exon_number |
| "5"; oId "CUFF.45967.3"; tss_id "TSS34243";  |                        |          |   |   |                                                                    |
| chr19                                        | Cufflinks exon29213477 | 29213687 | . | - | .                                                                  |
|                                              |                        |          |   |   | gene_id "XLOC_027078"; transcript_id "TCONS_00045573"; exon_number |
| "6"; oId "CUFF.45967.3"; tss_id "TSS34243";  |                        |          |   |   |                                                                    |
| chr19                                        | Cufflinks exon29215111 | 29215225 | . | - | .                                                                  |
|                                              |                        |          |   |   | gene_id "XLOC_027078"; transcript_id "TCONS_00045573"; exon_number |
| "7"; oId "CUFF.45967.3"; tss_id "TSS34243";  |                        |          |   |   |                                                                    |
| chr19                                        | Cufflinks exon29215726 | 29215896 | . | - | .                                                                  |
|                                              |                        |          |   |   | gene_id "XLOC_027078"; transcript_id "TCONS_00045573"; exon_number |
| "8"; oId "CUFF.45967.3"; tss_id "TSS34243";  |                        |          |   |   |                                                                    |
| chr19                                        | Cufflinks exon29217201 | 29217244 | . | - | .                                                                  |
|                                              |                        |          |   |   | gene_id "XLOC_027078"; transcript_id "TCONS_00045573"; exon_number |
| "9"; oId "CUFF.45967.3"; tss_id "TSS34243";  |                        |          |   |   |                                                                    |
| chr19                                        | Cufflinks exon29218487 | 29218601 | . | - | .                                                                  |
|                                              |                        |          |   |   | gene_id "XLOC_027078"; transcript_id "TCONS_00045573"; exon_number |
| "10"; oId "CUFF.45967.3"; tss_id "TSS34243"; |                        |          |   |   |                                                                    |
| chr19                                        | Cufflinks exon28926296 | 28927722 | . | - | .                                                                  |
|                                              |                        |          |   |   | gene_id "XLOC_027078"; transcript_id "TCONS_00045572"; exon_number |
| "1"; oId "CUFF.45967.2"; tss_id "TSS34243";  |                        |          |   |   |                                                                    |
| chr19                                        | Cufflinks exon28928489 | 28928625 | . | - | .                                                                  |
|                                              |                        |          |   |   | gene_id "XLOC_027078"; transcript_id "TCONS_00045572"; exon_number |
| "2"; oId "CUFF.45967.2"; tss_id "TSS34243";  |                        |          |   |   |                                                                    |
| chr19                                        | Cufflinks exon28947876 | 28947983 | . | - | .                                                                  |
|                                              |                        |          |   |   | gene_id "XLOC_027078"; transcript_id "TCONS_00045572"; exon_number |
| "3"; oId "CUFF.45967.2"; tss_id "TSS34243";  |                        |          |   |   |                                                                    |
| chr19                                        | Cufflinks exon28952194 | 28952469 | . | - | .                                                                  |
|                                              |                        |          |   |   | gene_id "XLOC_027078"; transcript_id "TCONS_00045572"; exon_number |
| "4"; oId "CUFF.45967.2"; tss_id "TSS34243";  |                        |          |   |   |                                                                    |
| chr19                                        | Cufflinks exon28957309 | 28957687 | . | - | .                                                                  |
|                                              |                        |          |   |   | gene_id "XLOC_027078"; transcript_id "TCONS_00045572"; exon_number |
| "5"; oId "CUFF.45967.2"; tss_id "TSS34243";  |                        |          |   |   |                                                                    |
| chr19                                        | Cufflinks exon29037143 | 29037334 | . | - | .                                                                  |
|                                              |                        |          |   |   | gene_id "XLOC_027078"; transcript_id "TCONS_00045572"; exon_number |
| "6"; oId "CUFF.45967.2"; tss_id "TSS34243";  |                        |          |   |   |                                                                    |
| chr19                                        | Cufflinks exon29037933 | 29038135 | . | - | .                                                                  |
|                                              |                        |          |   |   | gene_id "XLOC_027078"; transcript_id "TCONS_00045572"; exon_number |
| "7"; oId "CUFF.45967.2"; tss_id "TSS34243";  |                        |          |   |   |                                                                    |
| chr19                                        | Cufflinks exon29212861 | 29213025 | . | - | .                                                                  |
|                                              |                        |          |   |   | gene_id "XLOC_027078"; transcript_id "TCONS_00045572"; exon_number |
| "8"; oId "CUFF.45967.2"; tss_id "TSS34243";  |                        |          |   |   |                                                                    |
| chr19                                        | Cufflinks exon29213477 | 29213687 | . | - | .                                                                  |
|                                              |                        |          |   |   | gene_id "XLOC_027078"; transcript_id "TCONS_00045572"; exon_number |
| "9"; oId "CUFF.45967.2"; tss_id "TSS34243";  |                        |          |   |   |                                                                    |

|       |                |          |          |   |   |   |                                                                                                                 |
|-------|----------------|----------|----------|---|---|---|-----------------------------------------------------------------------------------------------------------------|
| chr19 | Cufflinks exon | 29215111 | 29215225 | . | - | . | gene_id "XLOC_027078"; transcript_id "TCONS_00045572"; exon_number "10"; oId "CUFF.45967.2"; tss_id "TSS34243"; |
| chr19 | Cufflinks exon | 29217206 | 29217245 | . | - | . | gene_id "XLOC_027078"; transcript_id "TCONS_00045572"; exon_number "11"; oId "CUFF.45967.2"; tss_id "TSS34243"; |
| chr19 | Cufflinks exon | 29218488 | 29218601 | . | - | . | gene_id "XLOC_027078"; transcript_id "TCONS_00045572"; exon_number "12"; oId "CUFF.45967.2"; tss_id "TSS34243"; |
| chr19 | Cufflinks exon | 28926296 | 28927722 | . | - | . | gene_id "XLOC_027078"; transcript_id "TCONS_00045571"; exon_number "1"; oId "CUFF.45967.1"; tss_id "TSS34243";  |
| chr19 | Cufflinks exon | 28927823 | 28928041 | . | - | . | gene_id "XLOC_027078"; transcript_id "TCONS_00045571"; exon_number "2"; oId "CUFF.45967.1"; tss_id "TSS34243";  |
| chr19 | Cufflinks exon | 28928392 | 28928625 | . | - | . | gene_id "XLOC_027078"; transcript_id "TCONS_00045571"; exon_number "3"; oId "CUFF.45967.1"; tss_id "TSS34243";  |
| chr19 | Cufflinks exon | 28952194 | 28952404 | . | - | . | gene_id "XLOC_027078"; transcript_id "TCONS_00045571"; exon_number "4"; oId "CUFF.45967.1"; tss_id "TSS34243";  |
| chr19 | Cufflinks exon | 28957309 | 28957687 | . | - | . | gene_id "XLOC_027078"; transcript_id "TCONS_00045571"; exon_number "5"; oId "CUFF.45967.1"; tss_id "TSS34243";  |
| chr19 | Cufflinks exon | 29213477 | 29213687 | . | - | . | gene_id "XLOC_027078"; transcript_id "TCONS_00045571"; exon_number "6"; oId "CUFF.45967.1"; tss_id "TSS34243";  |
| chr19 | Cufflinks exon | 29215111 | 29215225 | . | - | . | gene_id "XLOC_027078"; transcript_id "TCONS_00045571"; exon_number "7"; oId "CUFF.45967.1"; tss_id "TSS34243";  |
| chr19 | Cufflinks exon | 29215726 | 29215896 | . | - | . | gene_id "XLOC_027078"; transcript_id "TCONS_00045571"; exon_number "8"; oId "CUFF.45967.1"; tss_id "TSS34243";  |
| chr19 | Cufflinks exon | 29217206 | 29217244 | . | - | . | gene_id "XLOC_027078"; transcript_id "TCONS_00045571"; exon_number "9"; oId "CUFF.45967.1"; tss_id "TSS34243";  |
| chr19 | Cufflinks exon | 29218487 | 29218601 | . | - | . | gene_id "XLOC_027078"; transcript_id "TCONS_00045571"; exon_number "10"; oId "CUFF.45967.1"; tss_id "TSS34243"; |
| chr19 | Cufflinks exon | 28951242 | 28951352 | . | - | . | gene_id "XLOC_027078"; transcript_id "TCONS_00045574"; exon_number "1"; oId "CUFF.45967.4"; tss_id "TSS34244";  |
| chr19 | Cufflinks exon | 28952194 | 28952404 | . | - | . | gene_id "XLOC_027078"; transcript_id "TCONS_00045574"; exon_number "2"; oId "CUFF.45967.4"; tss_id "TSS34244";  |
| chr19 | Cufflinks exon | 28957309 | 28957687 | . | - | . | gene_id "XLOC_027078"; transcript_id "TCONS_00045574"; exon_number "3"; oId "CUFF.45967.4"; tss_id "TSS34244";  |
| chr19 | Cufflinks exon | 29123527 | 29123634 | . | - | . | gene_id "XLOC_027078"; transcript_id "TCONS_00045574"; exon_number "4"; oId "CUFF.45967.4"; tss_id "TSS34244";  |
| chr19 | Cufflinks exon | 31640818 | 31642650 | . | - | . | gene_id "XLOC_027093"; transcript_id "TCONS_00045595"; exon_number "1"; oId "CUFF.46039.2"; tss_id "TSS34261";  |
| chr19 | Cufflinks exon | 31647262 | 31647325 | . | - | . | gene_id "XLOC_027093"; transcript_id "TCONS_00045595"; exon_number "2"; oId "CUFF.46039.2"; tss_id "TSS34261";  |
| chr19 | Cufflinks exon | 31695864 | 31695984 | . | - | . | gene_id "XLOC_027093"; transcript_id "TCONS_00045595"; exon_number "3"; oId "CUFF.46039.2"; tss_id "TSS34261";  |
| chr19 | Cufflinks exon | 31718911 | 31718924 | . | - | . | gene_id "XLOC_027093"; transcript_id "TCONS_00045595"; exon_number "4"; oId "CUFF.46039.2"; tss_id "TSS34261";  |
| chr19 | Cufflinks exon | 31640818 | 31642650 | . | - | . | gene_id "XLOC_027093"; transcript_id "TCONS_00045596"; exon_number                                              |

|                                             |       |                        |          |   |   |   |                                                                    |
|---------------------------------------------|-------|------------------------|----------|---|---|---|--------------------------------------------------------------------|
| "1"; oId "CUFF.46039.1"; tss_id "TSS34262"; | chr19 | Cufflinks exon31647262 | 31647323 | . | - | . | gene_id "XLOC_027093"; transcript_id "TCONS_00045596"; exon_number |
| "2"; oId "CUFF.46039.1"; tss_id "TSS34262"; | chr19 | Cufflinks exon31695862 | 31695984 | . | - | . | gene_id "XLOC_027093"; transcript_id "TCONS_00045596"; exon_number |
| "3"; oId "CUFF.46039.1"; tss_id "TSS34262"; | chr19 | Cufflinks exon31718911 | 31719046 | . | - | . | gene_id "XLOC_027093"; transcript_id "TCONS_00045596"; exon_number |
| "4"; oId "CUFF.46039.1"; tss_id "TSS34262"; | chr19 | Cufflinks exon31722957 | 31723171 | . | - | . | gene_id "XLOC_027093"; transcript_id "TCONS_00045596"; exon_number |
| "5"; oId "CUFF.46039.1"; tss_id "TSS34262"; | chr19 | Cufflinks exon32880734 | 32881239 | . | - | . | gene_id "XLOC_027097"; transcript_id "TCONS_00045600"; exon_number |
| "1"; oId "CUFF.46053.1"; tss_id "TSS34266"; | chr19 | Cufflinks exon32890657 | 32890774 | . | - | . | gene_id "XLOC_027097"; transcript_id "TCONS_00045600"; exon_number |
| "2"; oId "CUFF.46053.1"; tss_id "TSS34266"; | chr19 | Cufflinks exon32895897 | 32896445 | . | - | . | gene_id "XLOC_027097"; transcript_id "TCONS_00045600"; exon_number |
| "3"; oId "CUFF.46053.1"; tss_id "TSS34266"; | chr19 | Cufflinks exon32880734 | 32881239 | . | - | . | gene_id "XLOC_027097"; transcript_id "TCONS_00045601"; exon_number |
| "1"; oId "CUFF.46053.2"; tss_id "TSS34266"; | chr19 | Cufflinks exon32882022 | 32882092 | . | - | . | gene_id "XLOC_027097"; transcript_id "TCONS_00045601"; exon_number |
| "2"; oId "CUFF.46053.2"; tss_id "TSS34266"; | chr19 | Cufflinks exon32890657 | 32890778 | . | - | . | gene_id "XLOC_027097"; transcript_id "TCONS_00045601"; exon_number |
| "3"; oId "CUFF.46053.2"; tss_id "TSS34266"; | chr19 | Cufflinks exon32895897 | 32896493 | . | - | . | gene_id "XLOC_027097"; transcript_id "TCONS_00045601"; exon_number |
| "4"; oId "CUFF.46053.2"; tss_id "TSS34266"; | chr19 | Cufflinks exon33647609 | 33647674 | . | - | . | gene_id "XLOC_027107"; transcript_id "TCONS_00045623"; exon_number |
| "1"; oId "CUFF.46089.3"; tss_id "TSS34279"; | chr19 | Cufflinks exon33665106 | 33667840 | . | - | . | gene_id "XLOC_027107"; transcript_id "TCONS_00045623"; exon_number |
| "2"; oId "CUFF.46089.3"; tss_id "TSS34279"; | chr19 | Cufflinks exon34043468 | 34044082 | . | - | . | gene_id "XLOC_027113"; transcript_id "TCONS_00045629"; exon_number |
| "1"; oId "CUFF.46113.3"; tss_id "TSS34285"; | chr19 | Cufflinks exon34045683 | 34046059 | . | - | . | gene_id "XLOC_027113"; transcript_id "TCONS_00045629"; exon_number |
| "2"; oId "CUFF.46113.3"; tss_id "TSS34285"; | chr19 | Cufflinks exon34046735 | 34046775 | . | - | . | gene_id "XLOC_027113"; transcript_id "TCONS_00045629"; exon_number |
| "3"; oId "CUFF.46113.3"; tss_id "TSS34285"; | chr19 | Cufflinks exon34043468 | 34044082 | . | - | . | gene_id "XLOC_027113"; transcript_id "TCONS_00045630"; exon_number |
| "1"; oId "CUFF.46113.4"; tss_id "TSS34285"; | chr19 | Cufflinks exon34045683 | 34046782 | . | - | . | gene_id "XLOC_027113"; transcript_id "TCONS_00045630"; exon_number |
| "2"; oId "CUFF.46113.4"; tss_id "TSS34285"; | chr19 | Cufflinks exon34043468 | 34044082 | . | - | . | gene_id "XLOC_027113"; transcript_id "TCONS_00045631"; exon_number |
| "1"; oId "CUFF.46113.1"; tss_id "TSS34285"; | chr19 | Cufflinks exon34045683 | 34046059 | . | - | . | gene_id "XLOC_027113"; transcript_id "TCONS_00045631"; exon_number |
| "2"; oId "CUFF.46113.1"; tss_id "TSS34285"; | chr19 | Cufflinks exon34046699 | 34046785 | . | - | . | gene_id "XLOC_027113"; transcript_id "TCONS_00045631"; exon_number |
| "3"; oId "CUFF.46113.1"; tss_id "TSS34285"; |       |                        |          |   |   |   |                                                                    |



|       |                                              |          |          |   |   |   |                                                                    |
|-------|----------------------------------------------|----------|----------|---|---|---|--------------------------------------------------------------------|
| chr19 | Cufflinks exon                               | 34043468 | 34044082 | . | - | . | gene_id "XLOC_027113"; transcript_id "TCONS_00045632"; exon_number |
|       | "1"; oId "CUFF.46113.2"; tss_id "TSS34285";  |          |          |   |   |   |                                                                    |
| chr19 | Cufflinks exon                               | 34045683 | 34045825 | . | - | . | gene_id "XLOC_027113"; transcript_id "TCONS_00045632"; exon_number |
|       | "2"; oId "CUFF.46113.2"; tss_id "TSS34285";  |          |          |   |   |   |                                                                    |
| chr19 | Cufflinks exon                               | 34046735 | 34046797 | . | - | . | gene_id "XLOC_027113"; transcript_id "TCONS_00045632"; exon_number |
|       | "3"; oId "CUFF.46113.2"; tss_id "TSS34285";  |          |          |   |   |   |                                                                    |
| chr19 | Cufflinks exon                               | 35339552 | 35340453 | . | - | . | gene_id "XLOC_027146"; transcript_id "TCONS_00045671"; exon_number |
|       | "1"; oId "CUFF.46211.10"; tss_id "TSS34323"; |          |          |   |   |   |                                                                    |
| chr19 | Cufflinks exon                               | 35341573 | 35342722 | . | - | . | gene_id "XLOC_027146"; transcript_id "TCONS_00045671"; exon_number |
|       | "2"; oId "CUFF.46211.10"; tss_id "TSS34323"; |          |          |   |   |   |                                                                    |
| chr19 | Cufflinks exon                               | 39726044 | 39727341 | . | - | . | gene_id "XLOC_027235"; transcript_id "TCONS_00045857"; exon_number |
|       | "1"; oId "CUFF.46646.5"; tss_id "TSS34451";  |          |          |   |   |   |                                                                    |
| chr19 | Cufflinks exon                               | 39727447 | 39727596 | . | - | . | gene_id "XLOC_027235"; transcript_id "TCONS_00045857"; exon_number |
|       | "2"; oId "CUFF.46646.5"; tss_id "TSS34451";  |          |          |   |   |   |                                                                    |
| chr19 | Cufflinks exon                               | 39727856 | 39727933 | . | - | . | gene_id "XLOC_027235"; transcript_id "TCONS_00045857"; exon_number |
|       | "3"; oId "CUFF.46646.5"; tss_id "TSS34451";  |          |          |   |   |   |                                                                    |
| chr19 | Cufflinks exon                               | 39728240 | 39728599 | . | - | . | gene_id "XLOC_027235"; transcript_id "TCONS_00045857"; exon_number |
|       | "4"; oId "CUFF.46646.5"; tss_id "TSS34451";  |          |          |   |   |   |                                                                    |
| chr19 | Cufflinks exon                               | 39726044 | 39727596 | . | - | . | gene_id "XLOC_027235"; transcript_id "TCONS_00045858"; exon_number |
|       | "1"; oId "CUFF.46646.3"; tss_id "TSS34451";  |          |          |   |   |   |                                                                    |
| chr19 | Cufflinks exon                               | 39727856 | 39727940 | . | - | . | gene_id "XLOC_027235"; transcript_id "TCONS_00045858"; exon_number |
|       | "2"; oId "CUFF.46646.3"; tss_id "TSS34451";  |          |          |   |   |   |                                                                    |
| chr19 | Cufflinks exon                               | 39728245 | 39728660 | . | - | . | gene_id "XLOC_027235"; transcript_id "TCONS_00045858"; exon_number |
|       | "3"; oId "CUFF.46646.3"; tss_id "TSS34451";  |          |          |   |   |   |                                                                    |
| chr19 | Cufflinks exon                               | 39726044 | 39727341 | . | - | . | gene_id "XLOC_027235"; transcript_id "TCONS_00045859"; exon_number |
|       | "1"; oId "CUFF.46646.4"; tss_id "TSS34451";  |          |          |   |   |   |                                                                    |
| chr19 | Cufflinks exon                               | 39727447 | 39727596 | . | - | . | gene_id "XLOC_027235"; transcript_id "TCONS_00045859"; exon_number |
|       | "2"; oId "CUFF.46646.4"; tss_id "TSS34451";  |          |          |   |   |   |                                                                    |
| chr19 | Cufflinks exon                               | 39727860 | 39727933 | . | - | . | gene_id "XLOC_027235"; transcript_id "TCONS_00045859"; exon_number |
|       | "3"; oId "CUFF.46646.4"; tss_id "TSS34451";  |          |          |   |   |   |                                                                    |
| chr19 | Cufflinks exon                               | 39728238 | 39728667 | . | - | . | gene_id "XLOC_027235"; transcript_id "TCONS_00045859"; exon_number |
|       | "4"; oId "CUFF.46646.4"; tss_id "TSS34451";  |          |          |   |   |   |                                                                    |
| chr19 | Cufflinks exon                               | 39726044 | 39727341 | . | - | . | gene_id "XLOC_027235"; transcript_id "TCONS_00045860"; exon_number |
|       | "1"; oId "CUFF.46646.1"; tss_id "TSS34451";  |          |          |   |   |   |                                                                    |
| chr19 | Cufflinks exon                               | 39727447 | 39727596 | . | - | . | gene_id "XLOC_027235"; transcript_id "TCONS_00045860"; exon_number |
|       | "2"; oId "CUFF.46646.1"; tss_id "TSS34451";  |          |          |   |   |   |                                                                    |
| chr19 | Cufflinks exon                               | 39727856 | 39727933 | . | - | . | gene_id "XLOC_027235"; transcript_id "TCONS_00045860"; exon_number |
|       | "3"; oId "CUFF.46646.1"; tss_id "TSS34451";  |          |          |   |   |   |                                                                    |
| chr19 | Cufflinks exon                               | 39728238 | 39728673 | . | - | . | gene_id "XLOC_027235"; transcript_id "TCONS_00045860"; exon_number |
|       | "4"; oId "CUFF.46646.1"; tss_id "TSS34451";  |          |          |   |   |   |                                                                    |
| chr19 | Cufflinks exon                               | 39928479 | 39928525 | . | - | . | gene_id "XLOC_027247"; transcript_id "TCONS_00045879"; exon_number |
|       | "1"; oId "CUFF.46679.1"; tss_id "TSS34466";  |          |          |   |   |   |                                                                    |
| chr19 | Cufflinks exon                               | 39935421 | 39936114 | . | - | . | gene_id "XLOC_027247"; transcript_id "TCONS_00045879"; exon_number |

"2"; oId "CUFF.46679.1"; tss\_id "TSS34466";  
chr19 Cufflinks exon42698265 42698526 . - . gene\_id "XLOC\_027293"; transcript\_id "TCONS\_00045988"; exon\_number  
"1"; oId "CUFF.46894.1"; tss\_id "TSS34535";  
chr19 Cufflinks exon42700535 42701558 . - . gene\_id "XLOC\_027293"; transcript\_id "TCONS\_00045988"; exon\_number  
"2"; oId "CUFF.46894.1"; tss\_id "TSS34535";  
chr19 Cufflinks exon51286410 51289080 . - . gene\_id "XLOC\_027484"; transcript\_id "TCONS\_00046358"; exon\_number  
"1"; oId "CUFF.47598.4"; tss\_id "TSS34811";  
chr19 Cufflinks exon51289199 51289258 . - . gene\_id "XLOC\_027484"; transcript\_id "TCONS\_00046358"; exon\_number  
"2"; oId "CUFF.47598.4"; tss\_id "TSS34811";  
chr19 Cufflinks exon51289347 51289467 . - . gene\_id "XLOC\_027484"; transcript\_id "TCONS\_00046358"; exon\_number  
"3"; oId "CUFF.47598.4"; tss\_id "TSS34811";  
chr19 Cufflinks exon51286410 51289080 . - . gene\_id "XLOC\_027484"; transcript\_id "TCONS\_00046359"; exon\_number  
"1"; oId "CUFF.47598.2"; tss\_id "TSS34812";  
chr19 Cufflinks exon51292875 51292895 . - . gene\_id "XLOC\_027484"; transcript\_id "TCONS\_00046359"; exon\_number  
"2"; oId "CUFF.47598.2"; tss\_id "TSS34812";  
chr19 Cufflinks exon51286410 51289080 . - . gene\_id "XLOC\_027484"; transcript\_id "TCONS\_00046360"; exon\_number  
"1"; oId "CUFF.47598.3"; tss\_id "TSS34812";  
chr19 Cufflinks exon51289199 51289258 . - . gene\_id "XLOC\_027484"; transcript\_id "TCONS\_00046360"; exon\_number  
"2"; oId "CUFF.47598.3"; tss\_id "TSS34812";  
chr19 Cufflinks exon51292875 51292949 . - . gene\_id "XLOC\_027484"; transcript\_id "TCONS\_00046360"; exon\_number  
"3"; oId "CUFF.47598.3"; tss\_id "TSS34812";  
chr19 Cufflinks exon51290673 51291699 . - . gene\_id "XLOC\_027484"; transcript\_id "TCONS\_00046361"; exon\_number  
"1"; oId "CUFF.47598.6"; tss\_id "TSS34813";  
chr19 Cufflinks exon51292875 51295897 . - . gene\_id "XLOC\_027484"; transcript\_id "TCONS\_00046361"; exon\_number  
"2"; oId "CUFF.47598.6"; tss\_id "TSS34813";  
chr19 Cufflinks exon51966426 51966756 . - . gene\_id "XLOC\_027506"; transcript\_id "TCONS\_00046403"; exon\_number  
"1"; oId "CUFF.47660.4"; tss\_id "TSS34847";  
chr19 Cufflinks exon51966896 51967096 . - . gene\_id "XLOC\_027506"; transcript\_id "TCONS\_00046403"; exon\_number  
"2"; oId "CUFF.47660.4"; tss\_id "TSS34847";  
chr19 Cufflinks exon51971673 51971859 . - . gene\_id "XLOC\_027506"; transcript\_id "TCONS\_00046403"; exon\_number  
"3"; oId "CUFF.47660.4"; tss\_id "TSS34847";  
chr19 Cufflinks exon51972107 51972172 . - . gene\_id "XLOC\_027506"; transcript\_id "TCONS\_00046403"; exon\_number  
"4"; oId "CUFF.47660.4"; tss\_id "TSS34847";  
chr19 Cufflinks exon51972554 51972730 . - . gene\_id "XLOC\_027506"; transcript\_id "TCONS\_00046403"; exon\_number  
"5"; oId "CUFF.47660.4"; tss\_id "TSS34847";  
chr19 Cufflinks exon57047444 57047701 . - . gene\_id "XLOC\_027642"; transcript\_id "TCONS\_00046676"; exon\_number  
"1"; oId "CUFF.48216.1"; tss\_id "TSS35021";  
chr19 Cufflinks exon57049020 57049106 . - . gene\_id "XLOC\_027642"; transcript\_id "TCONS\_00046676"; exon\_number  
"2"; oId "CUFF.48216.1"; tss\_id "TSS35021";  
chr19 Cufflinks exon57049622 57050100 . - . gene\_id "XLOC\_027642"; transcript\_id "TCONS\_00046676"; exon\_number  
"3"; oId "CUFF.48216.1"; tss\_id "TSS35021";  
chr19 Cufflinks exon57048302 57049106 . - . gene\_id "XLOC\_027642"; transcript\_id "TCONS\_00046677"; exon\_number  
"1"; oId "CUFF.48216.2"; tss\_id "TSS35022";

|       |                                             |          |          |   |   |   |                                                                             |
|-------|---------------------------------------------|----------|----------|---|---|---|-----------------------------------------------------------------------------|
| chr19 | Cufflinks exon                              | 57049622 | 57049719 | . | - | . | gene_id "XLOC_027642"; transcript_id "TCONS_00046677"; exon_number          |
|       | "2"; oId "CUFF.48216.2"; tss_id "TSS35022"; |          |          |   |   |   |                                                                             |
| chr19 | Cufflinks exon                              | 58546274 | 58548731 | . | - | . | gene_id "XLOC_027668"; transcript_id "TCONS_00046721"; exon_number          |
|       | "1"; oId "CUFF.48444.1"; tss_id "TSS35052"; |          |          |   |   |   |                                                                             |
| chr19 | Cufflinks exon                              | 58566580 | 58566835 | . | - | . | gene_id "XLOC_027668"; transcript_id "TCONS_00046721"; exon_number          |
|       | "2"; oId "CUFF.48444.1"; tss_id "TSS35052"; |          |          |   |   |   |                                                                             |
| chr19 | Cufflinks exon                              | 58770898 | 58771057 | . | - | . | gene_id "XLOC_027675"; transcript_id "TCONS_00046736"; exon_number          |
|       | "1"; oId "CUFF.48479.2"; tss_id "TSS35063"; |          |          |   |   |   |                                                                             |
| chr19 | Cufflinks exon                              | 58778234 | 58778391 | . | - | . | gene_id "XLOC_027675"; transcript_id "TCONS_00046736"; exon_number          |
|       | "2"; oId "CUFF.48479.2"; tss_id "TSS35063"; |          |          |   |   |   |                                                                             |
| chr19 | Cufflinks exon                              | 58789889 | 58790188 | . | - | . | gene_id "XLOC_027675"; transcript_id "TCONS_00046736"; exon_number          |
|       | "3"; oId "CUFF.48479.2"; tss_id "TSS35063"; |          |          |   |   |   |                                                                             |
| chr19 | Cufflinks exon                              | 58770898 | 58771057 | . | - | . | gene_id "XLOC_027675"; transcript_id "TCONS_00046735"; exon_number          |
|       | "1"; oId "CUFF.48479.1"; tss_id "TSS35063"; |          |          |   |   |   |                                                                             |
| chr19 | Cufflinks exon                              | 58789889 | 58790188 | . | - | . | gene_id "XLOC_027675"; transcript_id "TCONS_00046735"; exon_number          |
|       | "2"; oId "CUFF.48479.1"; tss_id "TSS35063"; |          |          |   |   |   |                                                                             |
| chr2  | Cufflinks exon                              | 301459   | 302294   | . | + | . | gene_id "XLOC_027704"; transcript_id "TCONS_00046779"; exon_number "1"; oId |
|       | "CUFF.48579.1"; tss_id "TSS35098";          |          |          |   |   |   |                                                                             |
| chr2  | Cufflinks exon                              | 303426   | 304910   | . | + | . | gene_id "XLOC_027704"; transcript_id "TCONS_00046779"; exon_number "2"; oId |
|       | "CUFF.48579.1"; tss_id "TSS35098";          |          |          |   |   |   |                                                                             |
| chr2  | Cufflinks exon                              | 309086   | 309158   | . | + | . | gene_id "XLOC_027704"; transcript_id "TCONS_00046779"; exon_number "3"; oId |
|       | "CUFF.48579.1"; tss_id "TSS35098";          |          |          |   |   |   |                                                                             |
| chr2  | Cufflinks exon                              | 765719   | 766311   | . | + | . | gene_id "XLOC_027714"; transcript_id "TCONS_00046791"; exon_number "1"; oId |
|       | "CUFF.48611.1"; tss_id "TSS35109";          |          |          |   |   |   |                                                                             |
| chr2  | Cufflinks exon                              | 776833   | 786991   | . | + | . | gene_id "XLOC_027714"; transcript_id "TCONS_00046791"; exon_number "2"; oId |
|       | "CUFF.48611.1"; tss_id "TSS35109";          |          |          |   |   |   |                                                                             |
| chr2  | Cufflinks exon                              | 765720   | 765988   | . | + | . | gene_id "XLOC_027714"; transcript_id "TCONS_00046792"; exon_number "1"; oId |
|       | "CUFF.48611.2"; tss_id "TSS35109";          |          |          |   |   |   |                                                                             |
| chr2  | Cufflinks exon                              | 766095   | 766311   | . | + | . | gene_id "XLOC_027714"; transcript_id "TCONS_00046792"; exon_number "2"; oId |
|       | "CUFF.48611.2"; tss_id "TSS35109";          |          |          |   |   |   |                                                                             |
| chr2  | Cufflinks exon                              | 776833   | 776968   | . | + | . | gene_id "XLOC_027714"; transcript_id "TCONS_00046792"; exon_number "3"; oId |
|       | "CUFF.48611.2"; tss_id "TSS35109";          |          |          |   |   |   |                                                                             |
| chr2  | Cufflinks exon                              | 777078   | 777368   | . | + | . | gene_id "XLOC_027714"; transcript_id "TCONS_00046792"; exon_number "4"; oId |
|       | "CUFF.48611.2"; tss_id "TSS35109";          |          |          |   |   |   |                                                                             |
| chr2  | Cufflinks exon                              | 778184   | 786991   | . | + | . | gene_id "XLOC_027714"; transcript_id "TCONS_00046792"; exon_number "5"; oId |
|       | "CUFF.48611.2"; tss_id "TSS35109";          |          |          |   |   |   |                                                                             |
| chr2  | Cufflinks exon                              | 766363   | 766740   | . | + | . | gene_id "XLOC_027714"; transcript_id "TCONS_00046793"; exon_number "1"; oId |
|       | "CUFF.48611.3"; tss_id "TSS35110";          |          |          |   |   |   |                                                                             |
| chr2  | Cufflinks exon                              | 776833   | 786991   | . | + | . | gene_id "XLOC_027714"; transcript_id "TCONS_00046793"; exon_number "2"; oId |
|       | "CUFF.48611.3"; tss_id "TSS35110";          |          |          |   |   |   |                                                                             |
| chr2  | Cufflinks exon                              | 863889   | 863934   | . | + | . | gene_id "XLOC_027718"; transcript_id "TCONS_00046797"; exon_number "1"; oId |
|       | "CUFF.48612.1"; tss_id "TSS35114";          |          |          |   |   |   |                                                                             |
| chr2  | Cufflinks exon                              | 864023   | 864110   | . | + | . | gene_id "XLOC_027718"; transcript_id "TCONS_00046797"; exon_number "2"; oId |

|                                                                          |       |                                                                             |
|--------------------------------------------------------------------------|-------|-----------------------------------------------------------------------------|
| "CUFF.48612.1"; tss_id "TSS35114";<br>chr2 Cufflinks exon864287 872557   | . + . | gene_id "XLOC_027718"; transcript_id "TCONS_00046797"; exon_number "3"; oId |
| "CUFF.48612.1"; tss_id "TSS35114";<br>chr2 Cufflinks exon875317 880736   | . + . | gene_id "XLOC_027718"; transcript_id "TCONS_00046797"; exon_number "4"; oId |
| "CUFF.48612.1"; tss_id "TSS35114";<br>chr2 Cufflinks exon880901 881168   | . + . | gene_id "XLOC_027718"; transcript_id "TCONS_00046797"; exon_number "5"; oId |
| "CUFF.48612.1"; tss_id "TSS35114";<br>chr2 Cufflinks exon881885 890549   | . + . | gene_id "XLOC_027718"; transcript_id "TCONS_00046797"; exon_number "6"; oId |
| "CUFF.48612.1"; tss_id "TSS35114";<br>chr2 Cufflinks exon875060 880120   | . + . | gene_id "XLOC_027718"; transcript_id "TCONS_00046799"; exon_number "1"; oId |
| "CUFF.48612.3"; tss_id "TSS35116";<br>chr2 Cufflinks exon880143 880736   | . + . | gene_id "XLOC_027718"; transcript_id "TCONS_00046799"; exon_number "2"; oId |
| "CUFF.48612.3"; tss_id "TSS35116";<br>chr2 Cufflinks exon880901 881274   | . + . | gene_id "XLOC_027718"; transcript_id "TCONS_00046799"; exon_number "3"; oId |
| "CUFF.48612.3"; tss_id "TSS35116";<br>chr2 Cufflinks exon880267 880558   | . + . | gene_id "XLOC_027718"; transcript_id "TCONS_00046800"; exon_number "1"; oId |
| "CUFF.48612.4"; tss_id "TSS35117";<br>chr2 Cufflinks exon880901 881274   | . + . | gene_id "XLOC_027718"; transcript_id "TCONS_00046800"; exon_number "2"; oId |
| "CUFF.48612.4"; tss_id "TSS35117";<br>chr2 Cufflinks exon881510 886521   | . + . | gene_id "XLOC_027718"; transcript_id "TCONS_00046801"; exon_number "1"; oId |
| "CUFF.48612.5"; tss_id "TSS35118";<br>chr2 Cufflinks exon886588 890549   | . + . | gene_id "XLOC_027718"; transcript_id "TCONS_00046801"; exon_number "2"; oId |
| "CUFF.48612.5"; tss_id "TSS35118";<br>chr2 Cufflinks exon1754483 1755246 | . + . | gene_id "XLOC_027740"; transcript_id "TCONS_00046835"; exon_number "1"; oId |
| "CUFF.48692.1"; tss_id "TSS35145";<br>chr2 Cufflinks exon1756544 1756667 | . + . | gene_id "XLOC_027740"; transcript_id "TCONS_00046835"; exon_number "2"; oId |
| "CUFF.48692.1"; tss_id "TSS35145";<br>chr2 Cufflinks exon1757218 1757672 | . + . | gene_id "XLOC_027740"; transcript_id "TCONS_00046835"; exon_number "3"; oId |
| "CUFF.48692.1"; tss_id "TSS35145";<br>chr2 Cufflinks exon1754501 1755246 | . + . | gene_id "XLOC_027740"; transcript_id "TCONS_00046836"; exon_number "1"; oId |
| "CUFF.48692.3"; tss_id "TSS35145";<br>chr2 Cufflinks exon1757218 1757672 | . + . | gene_id "XLOC_027740"; transcript_id "TCONS_00046836"; exon_number "2"; oId |
| "CUFF.48692.3"; tss_id "TSS35145";<br>chr2 Cufflinks exon1754522 1756667 | . + . | gene_id "XLOC_027740"; transcript_id "TCONS_00046838"; exon_number "1"; oId |
| "CUFF.48692.5"; tss_id "TSS35145";<br>chr2 Cufflinks exon1757218 1757672 | . + . | gene_id "XLOC_027740"; transcript_id "TCONS_00046838"; exon_number "2"; oId |
| "CUFF.48692.5"; tss_id "TSS35145";<br>chr2 Cufflinks exon5868247 5868284 | . + . | gene_id "XLOC_027775"; transcript_id "TCONS_00046888"; exon_number "1"; oId |
| "CUFF.48802.1"; tss_id "TSS35185";<br>chr2 Cufflinks exon5868860 5869514 | . + . | gene_id "XLOC_027775"; transcript_id "TCONS_00046888"; exon_number "2"; oId |
| "CUFF.48802.1"; tss_id "TSS35185";<br>chr2 Cufflinks exon7184754 7185545 | . + . | gene_id "XLOC_027780"; transcript_id "TCONS_00046894"; exon_number "1"; oId |
| "CUFF.48830.1"; tss_id "TSS35190";                                       |       |                                                                             |

|                                            |                                                                                                                |
|--------------------------------------------|----------------------------------------------------------------------------------------------------------------|
| chr2 Cufflinks exon7185644 7198717 . + .   | gene_id "XLOC_027780"; transcript_id "TCONS_00046894"; exon_number "2"; oId "CUFF.48830.1"; tss_id "TSS35190"; |
| chr2 Cufflinks exon7865552 7865984 . + .   | gene_id "XLOC_027800"; transcript_id "TCONS_00046917"; exon_number "1"; oId "CUFF.48864.1"; tss_id "TSS35213"; |
| chr2 Cufflinks exon7870647 7870757 . + .   | gene_id "XLOC_027800"; transcript_id "TCONS_00046917"; exon_number "2"; oId "CUFF.48864.1"; tss_id "TSS35213"; |
| chr2 Cufflinks exon10278620 10280106 . + . | gene_id "XLOC_027818"; transcript_id "TCONS_00046946"; exon_number "1"; oId "CUFF.48944.1"; tss_id "TSS35235"; |
| chr2 Cufflinks exon10284078 10285654 . + . | gene_id "XLOC_027818"; transcript_id "TCONS_00046946"; exon_number "2"; oId "CUFF.48944.1"; tss_id "TSS35235"; |
| chr2 Cufflinks exon10352720 10355861 . + . | gene_id "XLOC_027837"; transcript_id "TCONS_00046966"; exon_number "1"; oId "CUFF.48977.1"; tss_id "TSS35255"; |
| chr2 Cufflinks exon10357284 10359361 . + . | gene_id "XLOC_027837"; transcript_id "TCONS_00046966"; exon_number "2"; oId "CUFF.48977.1"; tss_id "TSS35255"; |
| chr2 Cufflinks exon10588741 10589307 . + . | gene_id "XLOC_027839"; transcript_id "TCONS_00046970"; exon_number "1"; oId "CUFF.48991.2"; tss_id "TSS35258"; |
| chr2 Cufflinks exon10589870 10589997 . + . | gene_id "XLOC_027839"; transcript_id "TCONS_00046970"; exon_number "2"; oId "CUFF.48991.2"; tss_id "TSS35258"; |
| chr2 Cufflinks exon10590299 10590407 . + . | gene_id "XLOC_027839"; transcript_id "TCONS_00046970"; exon_number "3"; oId "CUFF.48991.2"; tss_id "TSS35258"; |
| chr2 Cufflinks exon10590562 10590897 . + . | gene_id "XLOC_027839"; transcript_id "TCONS_00046970"; exon_number "4"; oId "CUFF.48991.2"; tss_id "TSS35258"; |
| chr2 Cufflinks exon10588797 10589997 . + . | gene_id "XLOC_027839"; transcript_id "TCONS_00046971"; exon_number "1"; oId "CUFF.48991.3"; tss_id "TSS35258"; |
| chr2 Cufflinks exon10590179 10590407 . + . | gene_id "XLOC_027839"; transcript_id "TCONS_00046971"; exon_number "2"; oId "CUFF.48991.3"; tss_id "TSS35258"; |
| chr2 Cufflinks exon10590562 10590781 . + . | gene_id "XLOC_027839"; transcript_id "TCONS_00046971"; exon_number "3"; oId "CUFF.48991.3"; tss_id "TSS35258"; |
| chr2 Cufflinks exon10592407 10592595 . + . | gene_id "XLOC_027839"; transcript_id "TCONS_00046971"; exon_number "4"; oId "CUFF.48991.3"; tss_id "TSS35258"; |
| chr2 Cufflinks exon10593995 10594184 . + . | gene_id "XLOC_027839"; transcript_id "TCONS_00046971"; exon_number "5"; oId "CUFF.48991.3"; tss_id "TSS35258"; |
| chr2 Cufflinks exon10595549 10597771 . + . | gene_id "XLOC_027839"; transcript_id "TCONS_00046971"; exon_number "6"; oId "CUFF.48991.3"; tss_id "TSS35258"; |
| chr2 Cufflinks exon10588814 10589307 . + . | gene_id "XLOC_027839"; transcript_id "TCONS_00046972"; exon_number "1"; oId "CUFF.48991.5"; tss_id "TSS35258"; |
| chr2 Cufflinks exon10589820 10589997 . + . | gene_id "XLOC_027839"; transcript_id "TCONS_00046972"; exon_number "2"; oId "CUFF.48991.5"; tss_id "TSS35258"; |
| chr2 Cufflinks exon10590179 10590407 . + . | gene_id "XLOC_027839"; transcript_id "TCONS_00046972"; exon_number "3"; oId "CUFF.48991.5"; tss_id "TSS35258"; |
| chr2 Cufflinks exon10590562 10590781 . + . | gene_id "XLOC_027839"; transcript_id "TCONS_00046972"; exon_number "4"; oId "CUFF.48991.5"; tss_id "TSS35258"; |
| chr2 Cufflinks exon10592407 10592595 . + . | gene_id "XLOC_027839"; transcript_id "TCONS_00046972"; exon_number "5";                                        |

|                                                                                |   |   |   |                                                                         |
|--------------------------------------------------------------------------------|---|---|---|-------------------------------------------------------------------------|
| oId "CUFF.48991.5"; tss_id "TSS35258";<br>chr2 Cufflinks exon10593196 10594184 | . | + | . | gene_id "XLOC_027839"; transcript_id "TCONS_00046972"; exon_number "6"; |
| oId "CUFF.48991.5"; tss_id "TSS35258";<br>chr2 Cufflinks exon10595549 10597771 | . | + | . | gene_id "XLOC_027839"; transcript_id "TCONS_00046972"; exon_number "7"; |
| oId "CUFF.48991.5"; tss_id "TSS35258";<br>chr2 Cufflinks exon12147242 12147353 | . | + | . | gene_id "XLOC_027856"; transcript_id "TCONS_00046999"; exon_number "1"; |
| oId "CUFF.49046.1"; tss_id "TSS35282";<br>chr2 Cufflinks exon12147873 12147969 | . | + | . | gene_id "XLOC_027856"; transcript_id "TCONS_00046999"; exon_number "2"; |
| oId "CUFF.49046.1"; tss_id "TSS35282";<br>chr2 Cufflinks exon12246944 12247077 | . | + | . | gene_id "XLOC_027856"; transcript_id "TCONS_00046999"; exon_number "3"; |
| oId "CUFF.49046.1"; tss_id "TSS35282";<br>chr2 Cufflinks exon12271432 12271710 | . | + | . | gene_id "XLOC_027856"; transcript_id "TCONS_00046999"; exon_number "4"; |
| oId "CUFF.49046.1"; tss_id "TSS35282";<br>chr2 Cufflinks exon12147242 12147353 | . | + | . | gene_id "XLOC_027856"; transcript_id "TCONS_00047000"; exon_number "1"; |
| oId "CUFF.49046.2"; tss_id "TSS35282";<br>chr2 Cufflinks exon12147873 12147969 | . | + | . | gene_id "XLOC_027856"; transcript_id "TCONS_00047000"; exon_number "2"; |
| oId "CUFF.49046.2"; tss_id "TSS35282";<br>chr2 Cufflinks exon12306864 12306981 | . | + | . | gene_id "XLOC_027856"; transcript_id "TCONS_00047000"; exon_number "3"; |
| oId "CUFF.49046.2"; tss_id "TSS35282";<br>chr2 Cufflinks exon12448814 12448910 | . | + | . | gene_id "XLOC_027856"; transcript_id "TCONS_00047000"; exon_number "4"; |
| oId "CUFF.49046.2"; tss_id "TSS35282";<br>chr2 Cufflinks exon12698332 12698570 | . | + | . | gene_id "XLOC_027856"; transcript_id "TCONS_00047000"; exon_number "5"; |
| oId "CUFF.49046.2"; tss_id "TSS35282";<br>chr2 Cufflinks exon12716943 12718474 | . | + | . | gene_id "XLOC_027856"; transcript_id "TCONS_00047000"; exon_number "6"; |
| oId "CUFF.49046.2"; tss_id "TSS35282";<br>chr2 Cufflinks exon12246672 12246810 | . | + | . | gene_id "XLOC_027856"; transcript_id "TCONS_00047002"; exon_number "1"; |
| oId "CUFF.49046.3"; tss_id "TSS35283";<br>chr2 Cufflinks exon12246944 12247077 | . | + | . | gene_id "XLOC_027856"; transcript_id "TCONS_00047002"; exon_number "2"; |
| oId "CUFF.49046.3"; tss_id "TSS35283";<br>chr2 Cufflinks exon12268093 12268106 | . | + | . | gene_id "XLOC_027856"; transcript_id "TCONS_00047002"; exon_number "3"; |
| oId "CUFF.49046.3"; tss_id "TSS35283";<br>chr2 Cufflinks exon12246672 12246810 | . | + | . | gene_id "XLOC_027856"; transcript_id "TCONS_00047003"; exon_number "1"; |
| oId "CUFF.49046.4"; tss_id "TSS35283";<br>chr2 Cufflinks exon12246944 12247077 | . | + | . | gene_id "XLOC_027856"; transcript_id "TCONS_00047003"; exon_number "2"; |
| oId "CUFF.49046.4"; tss_id "TSS35283";<br>chr2 Cufflinks exon12271432 12271710 | . | + | . | gene_id "XLOC_027856"; transcript_id "TCONS_00047003"; exon_number "3"; |
| oId "CUFF.49046.4"; tss_id "TSS35283";<br>chr2 Cufflinks exon12590926 12591271 | . | + | . | gene_id "XLOC_027856"; transcript_id "TCONS_00047004"; exon_number "1"; |
| oId "CUFF.49046.5"; tss_id "TSS35284";<br>chr2 Cufflinks exon12698332 12698570 | . | + | . | gene_id "XLOC_027856"; transcript_id "TCONS_00047004"; exon_number "2"; |
| oId "CUFF.49046.5"; tss_id "TSS35284";<br>chr2 Cufflinks exon12701226 12701391 | . | + | . | gene_id "XLOC_027856"; transcript_id "TCONS_00047004"; exon_number "3"; |
| oId "CUFF.49046.5"; tss_id "TSS35284";                                         |   |   |   |                                                                         |

|                                        |          |   |   |   |                                                                         |
|----------------------------------------|----------|---|---|---|-------------------------------------------------------------------------|
| chr2 Cufflinks exon12702270            | 12706784 | . | + | . | gene_id "XLOC_027856"; transcript_id "TCONS_00047004"; exon_number "4"; |
| oId "CUFF.49046.5"; tss_id "TSS35284"; |          |   |   |   |                                                                         |
| chr2 Cufflinks exon15771296            | 15773084 | . | + | . | gene_id "XLOC_027862"; transcript_id "TCONS_00047012"; exon_number "1"; |
| oId "CUFF.49077.2"; tss_id "TSS35291"; |          |   |   |   |                                                                         |
| chr2 Cufflinks exon15781159            | 15781382 | . | + | . | gene_id "XLOC_027862"; transcript_id "TCONS_00047012"; exon_number "2"; |
| oId "CUFF.49077.2"; tss_id "TSS35291"; |          |   |   |   |                                                                         |
| chr2 Cufflinks exon15783265            | 15783420 | . | + | . | gene_id "XLOC_027862"; transcript_id "TCONS_00047012"; exon_number "3"; |
| oId "CUFF.49077.2"; tss_id "TSS35291"; |          |   |   |   |                                                                         |
| chr2 Cufflinks exon15771352            | 15771376 | . | + | . | gene_id "XLOC_027862"; transcript_id "TCONS_00047013"; exon_number "1"; |
| oId "CUFF.49077.3"; tss_id "TSS35291"; |          |   |   |   |                                                                         |
| chr2 Cufflinks exon15772930            | 15772980 | . | + | . | gene_id "XLOC_027862"; transcript_id "TCONS_00047013"; exon_number "2"; |
| oId "CUFF.49077.3"; tss_id "TSS35291"; |          |   |   |   |                                                                         |
| chr2 Cufflinks exon15774030            | 15777689 | . | + | . | gene_id "XLOC_027862"; transcript_id "TCONS_00047013"; exon_number "3"; |
| oId "CUFF.49077.3"; tss_id "TSS35291"; |          |   |   |   |                                                                         |
| chr2 Cufflinks exon15771362            | 15771376 | . | + | . | gene_id "XLOC_027862"; transcript_id "TCONS_00047014"; exon_number "1"; |
| oId "CUFF.49077.4"; tss_id "TSS35291"; |          |   |   |   |                                                                         |
| chr2 Cufflinks exon15772930            | 15773084 | . | + | . | gene_id "XLOC_027862"; transcript_id "TCONS_00047014"; exon_number "2"; |
| oId "CUFF.49077.4"; tss_id "TSS35291"; |          |   |   |   |                                                                         |
| chr2 Cufflinks exon15774030            | 15777689 | . | + | . | gene_id "XLOC_027862"; transcript_id "TCONS_00047014"; exon_number "3"; |
| oId "CUFF.49077.4"; tss_id "TSS35291"; |          |   |   |   |                                                                         |
| chr2 Cufflinks exon15772387            | 15773084 | . | + | . | gene_id "XLOC_027862"; transcript_id "TCONS_00047015"; exon_number "1"; |
| oId "CUFF.49077.5"; tss_id "TSS35292"; |          |   |   |   |                                                                         |
| chr2 Cufflinks exon15774030            | 15777689 | . | + | . | gene_id "XLOC_027862"; transcript_id "TCONS_00047015"; exon_number "2"; |
| oId "CUFF.49077.5"; tss_id "TSS35292"; |          |   |   |   |                                                                         |
| chr2 Cufflinks exon25143421            | 25143441 | . | + | . | gene_id "XLOC_027936"; transcript_id "TCONS_00047113"; exon_number "1"; |
| oId "CUFF.49344.2"; tss_id "TSS35379"; |          |   |   |   |                                                                         |
| chr2 Cufflinks exon25143867            | 25144325 | . | + | . | gene_id "XLOC_027936"; transcript_id "TCONS_00047113"; exon_number "2"; |
| oId "CUFF.49344.2"; tss_id "TSS35379"; |          |   |   |   |                                                                         |
| chr2 Cufflinks exon25194981            | 25195101 | . | + | . | gene_id "XLOC_027939"; transcript_id "TCONS_00047116"; exon_number "1"; |
| oId "CUFF.49352.1"; tss_id "TSS35382"; |          |   |   |   |                                                                         |
| chr2 Cufflinks exon25195495            | 25195699 | . | + | . | gene_id "XLOC_027939"; transcript_id "TCONS_00047116"; exon_number "2"; |
| oId "CUFF.49352.1"; tss_id "TSS35382"; |          |   |   |   |                                                                         |
| chr2 Cufflinks exon25194981            | 25195101 | . | + | . | gene_id "XLOC_027939"; transcript_id "TCONS_00047117"; exon_number "1"; |
| oId "CUFF.49352.2"; tss_id "TSS35382"; |          |   |   |   |                                                                         |
| chr2 Cufflinks exon25224284            | 25224414 | . | + | . | gene_id "XLOC_027939"; transcript_id "TCONS_00047117"; exon_number "2"; |
| oId "CUFF.49352.2"; tss_id "TSS35382"; |          |   |   |   |                                                                         |
| chr2 Cufflinks exon25258142            | 25262563 | . | + | . | gene_id "XLOC_027939"; transcript_id "TCONS_00047117"; exon_number "3"; |
| oId "CUFF.49352.2"; tss_id "TSS35382"; |          |   |   |   |                                                                         |
| chr2 Cufflinks exon28582202            | 28582933 | . | + | . | gene_id "XLOC_027990"; transcript_id "TCONS_00047207"; exon_number "1"; |
| oId "CUFF.49514.3"; tss_id "TSS35443"; |          |   |   |   |                                                                         |
| chr2 Cufflinks exon28585795            | 28586401 | . | + | . | gene_id "XLOC_027990"; transcript_id "TCONS_00047207"; exon_number "2"; |
| oId "CUFF.49514.3"; tss_id "TSS35443"; |          |   |   |   |                                                                         |
| chr2 Cufflinks exon28582202            | 28585068 | . | + | . | gene_id "XLOC_027990"; transcript_id "TCONS_00047210"; exon_number "1"; |

|                                        |   |   |   |                                                                         |  |
|----------------------------------------|---|---|---|-------------------------------------------------------------------------|--|
| oId "CUFF.49514.6"; tss_id "TSS35443"; |   |   |   |                                                                         |  |
| chr2 Cufflinks exon28585795 28586098   | . | + | . | gene_id "XLOC_027990"; transcript_id "TCONS_00047210"; exon_number "2"; |  |
| oId "CUFF.49514.6"; tss_id "TSS35443"; |   |   |   |                                                                         |  |
| chr2 Cufflinks exon28587040 28588707   | . | + | . | gene_id "XLOC_027990"; transcript_id "TCONS_00047210"; exon_number "3"; |  |
| oId "CUFF.49514.6"; tss_id "TSS35443"; |   |   |   |                                                                         |  |
| chr2 Cufflinks exon28582202 28582945   | . | + | . | gene_id "XLOC_027990"; transcript_id "TCONS_00047209"; exon_number "1"; |  |
| oId "CUFF.49514.5"; tss_id "TSS35443"; |   |   |   |                                                                         |  |
| chr2 Cufflinks exon28584947 28586098   | . | + | . | gene_id "XLOC_027990"; transcript_id "TCONS_00047209"; exon_number "2"; |  |
| oId "CUFF.49514.5"; tss_id "TSS35443"; |   |   |   |                                                                         |  |
| chr2 Cufflinks exon28587040 28588707   | . | + | . | gene_id "XLOC_027990"; transcript_id "TCONS_00047209"; exon_number "3"; |  |
| oId "CUFF.49514.5"; tss_id "TSS35443"; |   |   |   |                                                                         |  |
| chr2 Cufflinks exon28582202 28582933   | . | + | . | gene_id "XLOC_027990"; transcript_id "TCONS_00047208"; exon_number "1"; |  |
| oId "CUFF.49514.4"; tss_id "TSS35443"; |   |   |   |                                                                         |  |
| chr2 Cufflinks exon28583692 28586098   | . | + | . | gene_id "XLOC_027990"; transcript_id "TCONS_00047208"; exon_number "2"; |  |
| oId "CUFF.49514.4"; tss_id "TSS35443"; |   |   |   |                                                                         |  |
| chr2 Cufflinks exon28586955 28588707   | . | + | . | gene_id "XLOC_027990"; transcript_id "TCONS_00047208"; exon_number "3"; |  |
| oId "CUFF.49514.4"; tss_id "TSS35443"; |   |   |   |                                                                         |  |
| chr2 Cufflinks exon39664508 39664676   | . | + | . | gene_id "XLOC_028066"; transcript_id "TCONS_00047347"; exon_number "1"; |  |
| oId "CUFF.49806.2"; tss_id "TSS35540"; |   |   |   |                                                                         |  |
| chr2 Cufflinks exon39680980 39681072   | . | + | . | gene_id "XLOC_028066"; transcript_id "TCONS_00047347"; exon_number "2"; |  |
| oId "CUFF.49806.2"; tss_id "TSS35540"; |   |   |   |                                                                         |  |
| chr2 Cufflinks exon39681438 39681506   | . | + | . | gene_id "XLOC_028066"; transcript_id "TCONS_00047347"; exon_number "3"; |  |
| oId "CUFF.49806.2"; tss_id "TSS35540"; |   |   |   |                                                                         |  |
| chr2 Cufflinks exon39701668 39706564   | . | + | . | gene_id "XLOC_028066"; transcript_id "TCONS_00047347"; exon_number "4"; |  |
| oId "CUFF.49806.2"; tss_id "TSS35540"; |   |   |   |                                                                         |  |
| chr2 Cufflinks exon40083174 40083196   | . | + | . | gene_id "XLOC_028073"; transcript_id "TCONS_00047357"; exon_number "1"; |  |
| oId "CUFF.49817.1"; tss_id "TSS35548"; |   |   |   |                                                                         |  |
| chr2 Cufflinks exon40149989 40150029   | . | + | . | gene_id "XLOC_028073"; transcript_id "TCONS_00047357"; exon_number "2"; |  |
| oId "CUFF.49817.1"; tss_id "TSS35548"; |   |   |   |                                                                         |  |
| chr2 Cufflinks exon40270558 40270682   | . | + | . | gene_id "XLOC_028073"; transcript_id "TCONS_00047357"; exon_number "3"; |  |
| oId "CUFF.49817.1"; tss_id "TSS35548"; |   |   |   |                                                                         |  |
| chr2 Cufflinks exon40332049 40332102   | . | + | . | gene_id "XLOC_028073"; transcript_id "TCONS_00047357"; exon_number "4"; |  |
| oId "CUFF.49817.1"; tss_id "TSS35548"; |   |   |   |                                                                         |  |
| chr2 Cufflinks exon40478824 40478914   | . | + | . | gene_id "XLOC_028073"; transcript_id "TCONS_00047357"; exon_number "5"; |  |
| oId "CUFF.49817.1"; tss_id "TSS35548"; |   |   |   |                                                                         |  |
| chr2 Cufflinks exon40481560 40482405   | . | + | . | gene_id "XLOC_028073"; transcript_id "TCONS_00047357"; exon_number "6"; |  |
| oId "CUFF.49817.1"; tss_id "TSS35548"; |   |   |   |                                                                         |  |
| chr2 Cufflinks exon40144774 40144799   | . | + | . | gene_id "XLOC_028073"; transcript_id "TCONS_00047359"; exon_number "1"; |  |
| oId "CUFF.49817.3"; tss_id "TSS35549"; |   |   |   |                                                                         |  |
| chr2 Cufflinks exon40149989 40150029   | . | + | . | gene_id "XLOC_028073"; transcript_id "TCONS_00047359"; exon_number "2"; |  |
| oId "CUFF.49817.3"; tss_id "TSS35549"; |   |   |   |                                                                         |  |
| chr2 Cufflinks exon40332049 40332102   | . | + | . | gene_id "XLOC_028073"; transcript_id "TCONS_00047359"; exon_number "3"; |  |
| oId "CUFF.49817.3"; tss_id "TSS35549"; |   |   |   |                                                                         |  |



|                                        |          |   |   |   |                                                                         |
|----------------------------------------|----------|---|---|---|-------------------------------------------------------------------------|
| chr2 Cufflinks exon40478824            | 40478914 | . | + | . | gene_id "XLOC_028073"; transcript_id "TCONS_00047359"; exon_number "4"; |
| oId "CUFF.49817.3"; tss_id "TSS35549"; |          |   |   |   |                                                                         |
| chr2 Cufflinks exon40481560            | 40482405 | . | + | . | gene_id "XLOC_028073"; transcript_id "TCONS_00047359"; exon_number "5"; |
| oId "CUFF.49817.3"; tss_id "TSS35549"; |          |   |   |   |                                                                         |
| chr2 Cufflinks exon40144774            | 40144799 | . | + | . | gene_id "XLOC_028073"; transcript_id "TCONS_00047358"; exon_number "1"; |
| oId "CUFF.49817.2"; tss_id "TSS35549"; |          |   |   |   |                                                                         |
| chr2 Cufflinks exon40149989            | 40150031 | . | + | . | gene_id "XLOC_028073"; transcript_id "TCONS_00047358"; exon_number "2"; |
| oId "CUFF.49817.2"; tss_id "TSS35549"; |          |   |   |   |                                                                         |
| chr2 Cufflinks exon40270560            | 40270682 | . | + | . | gene_id "XLOC_028073"; transcript_id "TCONS_00047358"; exon_number "3"; |
| oId "CUFF.49817.2"; tss_id "TSS35549"; |          |   |   |   |                                                                         |
| chr2 Cufflinks exon40478824            | 40478914 | . | + | . | gene_id "XLOC_028073"; transcript_id "TCONS_00047358"; exon_number "4"; |
| oId "CUFF.49817.2"; tss_id "TSS35549"; |          |   |   |   |                                                                         |
| chr2 Cufflinks exon40481560            | 40482405 | . | + | . | gene_id "XLOC_028073"; transcript_id "TCONS_00047358"; exon_number "5"; |
| oId "CUFF.49817.2"; tss_id "TSS35549"; |          |   |   |   |                                                                         |
| chr2 Cufflinks exon40146643            | 40146923 | . | + | . | gene_id "XLOC_028073"; transcript_id "TCONS_00047360"; exon_number "1"; |
| oId "CUFF.49817.4"; tss_id "TSS35550"; |          |   |   |   |                                                                         |
| chr2 Cufflinks exon40332049            | 40332102 | . | + | . | gene_id "XLOC_028073"; transcript_id "TCONS_00047360"; exon_number "2"; |
| oId "CUFF.49817.4"; tss_id "TSS35550"; |          |   |   |   |                                                                         |
| chr2 Cufflinks exon40478824            | 40478914 | . | + | . | gene_id "XLOC_028073"; transcript_id "TCONS_00047360"; exon_number "3"; |
| oId "CUFF.49817.4"; tss_id "TSS35550"; |          |   |   |   |                                                                         |
| chr2 Cufflinks exon40481560            | 40482405 | . | + | . | gene_id "XLOC_028073"; transcript_id "TCONS_00047360"; exon_number "4"; |
| oId "CUFF.49817.4"; tss_id "TSS35550"; |          |   |   |   |                                                                         |
| chr2 Cufflinks exon40146816            | 40146923 | . | + | . | gene_id "XLOC_028073"; transcript_id "TCONS_00047361"; exon_number "1"; |
| oId "CUFF.49817.5"; tss_id "TSS35551"; |          |   |   |   |                                                                         |
| chr2 Cufflinks exon40149989            | 40150034 | . | + | . | gene_id "XLOC_028073"; transcript_id "TCONS_00047361"; exon_number "2"; |
| oId "CUFF.49817.5"; tss_id "TSS35551"; |          |   |   |   |                                                                         |
| chr2 Cufflinks exon40332049            | 40332102 | . | + | . | gene_id "XLOC_028073"; transcript_id "TCONS_00047361"; exon_number "3"; |
| oId "CUFF.49817.5"; tss_id "TSS35551"; |          |   |   |   |                                                                         |
| chr2 Cufflinks exon40478824            | 40478914 | . | + | . | gene_id "XLOC_028073"; transcript_id "TCONS_00047361"; exon_number "4"; |
| oId "CUFF.49817.5"; tss_id "TSS35551"; |          |   |   |   |                                                                         |
| chr2 Cufflinks exon40481560            | 40482405 | . | + | . | gene_id "XLOC_028073"; transcript_id "TCONS_00047361"; exon_number "5"; |
| oId "CUFF.49817.5"; tss_id "TSS35551"; |          |   |   |   |                                                                         |
| chr2 Cufflinks exon40146817            | 40146923 | . | + | . | gene_id "XLOC_028073"; transcript_id "TCONS_00047362"; exon_number "1"; |
| oId "CUFF.49817.6"; tss_id "TSS35551"; |          |   |   |   |                                                                         |
| chr2 Cufflinks exon40149989            | 40150029 | . | + | . | gene_id "XLOC_028073"; transcript_id "TCONS_00047362"; exon_number "2"; |
| oId "CUFF.49817.6"; tss_id "TSS35551"; |          |   |   |   |                                                                         |
| chr2 Cufflinks exon40332049            | 40332102 | . | + | . | gene_id "XLOC_028073"; transcript_id "TCONS_00047362"; exon_number "3"; |
| oId "CUFF.49817.6"; tss_id "TSS35551"; |          |   |   |   |                                                                         |
| chr2 Cufflinks exon40478824            | 40478914 | . | + | . | gene_id "XLOC_028073"; transcript_id "TCONS_00047362"; exon_number "4"; |
| oId "CUFF.49817.6"; tss_id "TSS35551"; |          |   |   |   |                                                                         |
| chr2 Cufflinks exon40481560            | 40482405 | . | + | . | gene_id "XLOC_028073"; transcript_id "TCONS_00047362"; exon_number "5"; |
| oId "CUFF.49817.6"; tss_id "TSS35551"; |          |   |   |   |                                                                         |
| chr2 Cufflinks exon40146844            | 40146923 | . | + | . | gene_id "XLOC_028073"; transcript_id "TCONS_00047363"; exon_number "1"; |

|                                        |   |   |   |                                                                         |  |
|----------------------------------------|---|---|---|-------------------------------------------------------------------------|--|
| oId "CUFF.49817.7"; tss_id "TSS35551"; |   |   |   |                                                                         |  |
| chr2 Cufflinks exon40270558 40270682   | . | + | . | gene_id "XLOC_028073"; transcript_id "TCONS_00047363"; exon_number "2"; |  |
| oId "CUFF.49817.7"; tss_id "TSS35551"; |   |   |   |                                                                         |  |
| chr2 Cufflinks exon40478824 40478914   | . | + | . | gene_id "XLOC_028073"; transcript_id "TCONS_00047363"; exon_number "3"; |  |
| oId "CUFF.49817.7"; tss_id "TSS35551"; |   |   |   |                                                                         |  |
| chr2 Cufflinks exon40481560 40482405   | . | + | . | gene_id "XLOC_028073"; transcript_id "TCONS_00047363"; exon_number "4"; |  |
| oId "CUFF.49817.7"; tss_id "TSS35551"; |   |   |   |                                                                         |  |
| chr2 Cufflinks exon40146968 40147033   | . | + | . | gene_id "XLOC_028073"; transcript_id "TCONS_00047364"; exon_number "1"; |  |
| oId "CUFF.49817.8"; tss_id "TSS35552"; |   |   |   |                                                                         |  |
| chr2 Cufflinks exon40332049 40332102   | . | + | . | gene_id "XLOC_028073"; transcript_id "TCONS_00047364"; exon_number "2"; |  |
| oId "CUFF.49817.8"; tss_id "TSS35552"; |   |   |   |                                                                         |  |
| chr2 Cufflinks exon40478824 40478914   | . | + | . | gene_id "XLOC_028073"; transcript_id "TCONS_00047364"; exon_number "3"; |  |
| oId "CUFF.49817.8"; tss_id "TSS35552"; |   |   |   |                                                                         |  |
| chr2 Cufflinks exon40481560 40482405   | . | + | . | gene_id "XLOC_028073"; transcript_id "TCONS_00047364"; exon_number "4"; |  |
| oId "CUFF.49817.8"; tss_id "TSS35552"; |   |   |   |                                                                         |  |
| chr2 Cufflinks exon47055003 47055223   | . | + | . | gene_id "XLOC_028216"; transcript_id "TCONS_00047536"; exon_number "1"; |  |
| oId "CUFF.50227.1"; tss_id "TSS35709"; |   |   |   |                                                                         |  |
| chr2 Cufflinks exon47083062 47083129   | . | + | . | gene_id "XLOC_028216"; transcript_id "TCONS_00047536"; exon_number "2"; |  |
| oId "CUFF.50227.1"; tss_id "TSS35709"; |   |   |   |                                                                         |  |
| chr2 Cufflinks exon47085225 47086145   | . | + | . | gene_id "XLOC_028216"; transcript_id "TCONS_00047536"; exon_number "3"; |  |
| oId "CUFF.50227.1"; tss_id "TSS35709"; |   |   |   |                                                                         |  |
| chr2 Cufflinks exon48133950 48134131   | . | + | . | gene_id "XLOC_028240"; transcript_id "TCONS_00047562"; exon_number "1"; |  |
| oId "CUFF.50311.1"; tss_id "TSS35734"; |   |   |   |                                                                         |  |
| chr2 Cufflinks exon48134457 48136590   | . | + | . | gene_id "XLOC_028240"; transcript_id "TCONS_00047562"; exon_number "2"; |  |
| oId "CUFF.50311.1"; tss_id "TSS35734"; |   |   |   |                                                                         |  |
| chr2 Cufflinks exon58655463 58655599   | . | + | . | gene_id "XLOC_028279"; transcript_id "TCONS_00047619"; exon_number "1"; |  |
| oId "CUFF.50522.1"; tss_id "TSS35783"; |   |   |   |                                                                         |  |
| chr2 Cufflinks exon58883785 58883846   | . | + | . | gene_id "XLOC_028279"; transcript_id "TCONS_00047619"; exon_number "2"; |  |
| oId "CUFF.50522.1"; tss_id "TSS35783"; |   |   |   |                                                                         |  |
| chr2 Cufflinks exon59077565 59077741   | . | + | . | gene_id "XLOC_028279"; transcript_id "TCONS_00047619"; exon_number "3"; |  |
| oId "CUFF.50522.1"; tss_id "TSS35783"; |   |   |   |                                                                         |  |
| chr2 Cufflinks exon59142815 59143040   | . | + | . | gene_id "XLOC_028279"; transcript_id "TCONS_00047619"; exon_number "4"; |  |
| oId "CUFF.50522.1"; tss_id "TSS35783"; |   |   |   |                                                                         |  |
| chr2 Cufflinks exon59145831 59146236   | . | + | . | gene_id "XLOC_028279"; transcript_id "TCONS_00047619"; exon_number "5"; |  |
| oId "CUFF.50522.1"; tss_id "TSS35783"; |   |   |   |                                                                         |  |
| chr2 Cufflinks exon58747888 58748072   | . | + | . | gene_id "XLOC_028279"; transcript_id "TCONS_00047620"; exon_number "1"; |  |
| oId "CUFF.50522.2"; tss_id "TSS35784"; |   |   |   |                                                                         |  |
| chr2 Cufflinks exon58883785 58883846   | . | + | . | gene_id "XLOC_028279"; transcript_id "TCONS_00047620"; exon_number "2"; |  |
| oId "CUFF.50522.2"; tss_id "TSS35784"; |   |   |   |                                                                         |  |
| chr2 Cufflinks exon59077565 59077741   | . | + | . | gene_id "XLOC_028279"; transcript_id "TCONS_00047620"; exon_number "3"; |  |
| oId "CUFF.50522.2"; tss_id "TSS35784"; |   |   |   |                                                                         |  |
| chr2 Cufflinks exon59142891 59143037   | . | + | . | gene_id "XLOC_028279"; transcript_id "TCONS_00047620"; exon_number "4"; |  |
| oId "CUFF.50522.2"; tss_id "TSS35784"; |   |   |   |                                                                         |  |

|                                        |          |   |   |   |                                                                          |
|----------------------------------------|----------|---|---|---|--------------------------------------------------------------------------|
| chr2 Cufflinks exon59145831            | 59145988 | . | + | . | gene_id "XLOC_028279"; transcript_id "TCONS_00047620"; exon_number "5";  |
| oId "CUFF.50522.2"; tss_id "TSS35784"; |          |   |   |   |                                                                          |
| chr2 Cufflinks exon59151680            | 59151761 | . | + | . | gene_id "XLOC_028279"; transcript_id "TCONS_00047620"; exon_number "6";  |
| oId "CUFF.50522.2"; tss_id "TSS35784"; |          |   |   |   |                                                                          |
| chr2 Cufflinks exon59152746            | 59153213 | . | + | . | gene_id "XLOC_028279"; transcript_id "TCONS_00047620"; exon_number "7";  |
| oId "CUFF.50522.2"; tss_id "TSS35784"; |          |   |   |   |                                                                          |
| chr2 Cufflinks exon58747888            | 58748072 | . | + | . | gene_id "XLOC_028279"; transcript_id "TCONS_00047621"; exon_number "1";  |
| oId "CUFF.50522.3"; tss_id "TSS35784"; |          |   |   |   |                                                                          |
| chr2 Cufflinks exon58883785            | 58883846 | . | + | . | gene_id "XLOC_028279"; transcript_id "TCONS_00047621"; exon_number "2";  |
| oId "CUFF.50522.3"; tss_id "TSS35784"; |          |   |   |   |                                                                          |
| chr2 Cufflinks exon59077565            | 59077741 | . | + | . | gene_id "XLOC_028279"; transcript_id "TCONS_00047621"; exon_number "3";  |
| oId "CUFF.50522.3"; tss_id "TSS35784"; |          |   |   |   |                                                                          |
| chr2 Cufflinks exon59139854            | 59139881 | . | + | . | gene_id "XLOC_028279"; transcript_id "TCONS_00047621"; exon_number "4";  |
| oId "CUFF.50522.3"; tss_id "TSS35784"; |          |   |   |   |                                                                          |
| chr2 Cufflinks exon59151680            | 59151761 | . | + | . | gene_id "XLOC_028279"; transcript_id "TCONS_00047621"; exon_number "5";  |
| oId "CUFF.50522.3"; tss_id "TSS35784"; |          |   |   |   |                                                                          |
| chr2 Cufflinks exon59152746            | 59153044 | . | + | . | gene_id "XLOC_028279"; transcript_id "TCONS_00047621"; exon_number "6";  |
| oId "CUFF.50522.3"; tss_id "TSS35784"; |          |   |   |   |                                                                          |
| chr2 Cufflinks exon59231084            | 59231162 | . | + | . | gene_id "XLOC_028279"; transcript_id "TCONS_00047621"; exon_number "7";  |
| oId "CUFF.50522.3"; tss_id "TSS35784"; |          |   |   |   |                                                                          |
| chr2 Cufflinks exon59241465            | 59241533 | . | + | . | gene_id "XLOC_028279"; transcript_id "TCONS_00047621"; exon_number "8";  |
| oId "CUFF.50522.3"; tss_id "TSS35784"; |          |   |   |   |                                                                          |
| chr2 Cufflinks exon59246764            | 59246826 | . | + | . | gene_id "XLOC_028279"; transcript_id "TCONS_00047621"; exon_number "9";  |
| oId "CUFF.50522.3"; tss_id "TSS35784"; |          |   |   |   |                                                                          |
| chr2 Cufflinks exon59250091            | 59250117 | . | + | . | gene_id "XLOC_028279"; transcript_id "TCONS_00047621"; exon_number "10"; |
| oId "CUFF.50522.3"; tss_id "TSS35784"; |          |   |   |   |                                                                          |
| chr2 Cufflinks exon59251971            | 59252125 | . | + | . | gene_id "XLOC_028279"; transcript_id "TCONS_00047621"; exon_number "11"; |
| oId "CUFF.50522.3"; tss_id "TSS35784"; |          |   |   |   |                                                                          |
| chr2 Cufflinks exon59260305            | 59260350 | . | + | . | gene_id "XLOC_028279"; transcript_id "TCONS_00047621"; exon_number "12"; |
| oId "CUFF.50522.3"; tss_id "TSS35784"; |          |   |   |   |                                                                          |
| chr2 Cufflinks exon59285696            | 59285731 | . | + | . | gene_id "XLOC_028279"; transcript_id "TCONS_00047621"; exon_number "13"; |
| oId "CUFF.50522.3"; tss_id "TSS35784"; |          |   |   |   |                                                                          |
| chr2 Cufflinks exon59287914            | 59290901 | . | + | . | gene_id "XLOC_028279"; transcript_id "TCONS_00047621"; exon_number "14"; |
| oId "CUFF.50522.3"; tss_id "TSS35784"; |          |   |   |   |                                                                          |
| chr2 Cufflinks exon58958953            | 58960136 | . | + | . | gene_id "XLOC_028279"; transcript_id "TCONS_00047622"; exon_number "1";  |
| oId "CUFF.50522.4"; tss_id "TSS35785"; |          |   |   |   |                                                                          |
| chr2 Cufflinks exon59077565            | 59077741 | . | + | . | gene_id "XLOC_028279"; transcript_id "TCONS_00047622"; exon_number "2";  |
| oId "CUFF.50522.4"; tss_id "TSS35785"; |          |   |   |   |                                                                          |
| chr2 Cufflinks exon59151680            | 59151761 | . | + | . | gene_id "XLOC_028279"; transcript_id "TCONS_00047622"; exon_number "3";  |
| oId "CUFF.50522.4"; tss_id "TSS35785"; |          |   |   |   |                                                                          |
| chr2 Cufflinks exon59152746            | 59153044 | . | + | . | gene_id "XLOC_028279"; transcript_id "TCONS_00047622"; exon_number "4";  |
| oId "CUFF.50522.4"; tss_id "TSS35785"; |          |   |   |   |                                                                          |
| chr2 Cufflinks exon59156778            | 59157545 | . | + | . | gene_id "XLOC_028279"; transcript_id "TCONS_00047622"; exon_number "5";  |

|                                                                                |   |   |   |                                                                         |
|--------------------------------------------------------------------------------|---|---|---|-------------------------------------------------------------------------|
| oId "CUFF.50522.4"; tss_id "TSS35785";<br>chr2 Cufflinks exon58958953 58960137 | . | + | . | gene_id "XLOC_028279"; transcript_id "TCONS_00047623"; exon_number "1"; |
| oId "CUFF.50522.5"; tss_id "TSS35785";<br>chr2 Cufflinks exon59077565 59077741 | . | + | . | gene_id "XLOC_028279"; transcript_id "TCONS_00047623"; exon_number "2"; |
| oId "CUFF.50522.5"; tss_id "TSS35785";<br>chr2 Cufflinks exon59151680 59151761 | . | + | . | gene_id "XLOC_028279"; transcript_id "TCONS_00047623"; exon_number "3"; |
| oId "CUFF.50522.5"; tss_id "TSS35785";<br>chr2 Cufflinks exon59152746 59153044 | . | + | . | gene_id "XLOC_028279"; transcript_id "TCONS_00047623"; exon_number "4"; |
| oId "CUFF.50522.5"; tss_id "TSS35785";<br>chr2 Cufflinks exon59157771 59159244 | . | + | . | gene_id "XLOC_028279"; transcript_id "TCONS_00047623"; exon_number "5"; |
| oId "CUFF.50522.5"; tss_id "TSS35785";<br>chr2 Cufflinks exon59142854 59143037 | . | + | . | gene_id "XLOC_028279"; transcript_id "TCONS_00047624"; exon_number "1"; |
| oId "CUFF.50522.6"; tss_id "TSS35786";<br>chr2 Cufflinks exon59151680 59151761 | . | + | . | gene_id "XLOC_028279"; transcript_id "TCONS_00047624"; exon_number "2"; |
| oId "CUFF.50522.6"; tss_id "TSS35786";<br>chr2 Cufflinks exon59152746 59153044 | . | + | . | gene_id "XLOC_028279"; transcript_id "TCONS_00047624"; exon_number "3"; |
| oId "CUFF.50522.6"; tss_id "TSS35786";<br>chr2 Cufflinks exon59157771 59159244 | . | + | . | gene_id "XLOC_028279"; transcript_id "TCONS_00047624"; exon_number "4"; |
| oId "CUFF.50522.6"; tss_id "TSS35786";<br>chr2 Cufflinks exon59150891 59151761 | . | + | . | gene_id "XLOC_028279"; transcript_id "TCONS_00047627"; exon_number "1"; |
| oId "CUFF.50522.8"; tss_id "TSS35787";<br>chr2 Cufflinks exon59152746 59153044 | . | + | . | gene_id "XLOC_028279"; transcript_id "TCONS_00047627"; exon_number "2"; |
| oId "CUFF.50522.8"; tss_id "TSS35787";<br>chr2 Cufflinks exon59157771 59159244 | . | + | . | gene_id "XLOC_028279"; transcript_id "TCONS_00047627"; exon_number "3"; |
| oId "CUFF.50522.8"; tss_id "TSS35787";<br>chr2 Cufflinks exon59150891 59151761 | . | + | . | gene_id "XLOC_028279"; transcript_id "TCONS_00047628"; exon_number "1"; |
| oId "CUFF.50522.7"; tss_id "TSS35787";<br>chr2 Cufflinks exon59152746 59153044 | . | + | . | gene_id "XLOC_028279"; transcript_id "TCONS_00047628"; exon_number "2"; |
| oId "CUFF.50522.7"; tss_id "TSS35787";<br>chr2 Cufflinks exon59231084 59231162 | . | + | . | gene_id "XLOC_028279"; transcript_id "TCONS_00047628"; exon_number "3"; |
| oId "CUFF.50522.7"; tss_id "TSS35787";<br>chr2 Cufflinks exon59241465 59241533 | . | + | . | gene_id "XLOC_028279"; transcript_id "TCONS_00047628"; exon_number "4"; |
| oId "CUFF.50522.7"; tss_id "TSS35787";<br>chr2 Cufflinks exon59246764 59246826 | . | + | . | gene_id "XLOC_028279"; transcript_id "TCONS_00047628"; exon_number "5"; |
| oId "CUFF.50522.7"; tss_id "TSS35787";<br>chr2 Cufflinks exon59250091 59250117 | . | + | . | gene_id "XLOC_028279"; transcript_id "TCONS_00047628"; exon_number "6"; |
| oId "CUFF.50522.7"; tss_id "TSS35787";<br>chr2 Cufflinks exon59260305 59260352 | . | + | . | gene_id "XLOC_028279"; transcript_id "TCONS_00047628"; exon_number "7"; |
| oId "CUFF.50522.7"; tss_id "TSS35787";<br>chr2 Cufflinks exon59285698 59285733 | . | + | . | gene_id "XLOC_028279"; transcript_id "TCONS_00047628"; exon_number "8"; |
| oId "CUFF.50522.7"; tss_id "TSS35787";<br>chr2 Cufflinks exon59287916 59290901 | . | + | . | gene_id "XLOC_028279"; transcript_id "TCONS_00047628"; exon_number "9"; |
| oId "CUFF.50522.7"; tss_id "TSS35787";                                         |   |   |   |                                                                         |

|                                        |          |   |   |   |                                                                         |
|----------------------------------------|----------|---|---|---|-------------------------------------------------------------------------|
| chr2 Cufflinks exon60327421            | 60328117 | . | + | . | gene_id "XLOC_028287"; transcript_id "TCONS_00047635"; exon_number "1"; |
| oId "CUFF.50651.6"; tss_id "TSS35795"; |          |   |   |   |                                                                         |
| chr2 Cufflinks exon60331437            | 60334052 | . | + | . | gene_id "XLOC_028287"; transcript_id "TCONS_00047635"; exon_number "2"; |
| oId "CUFF.50651.6"; tss_id "TSS35795"; |          |   |   |   |                                                                         |
| chr2 Cufflinks exon60334676            | 60334721 | . | + | . | gene_id "XLOC_028287"; transcript_id "TCONS_00047635"; exon_number "3"; |
| oId "CUFF.50651.6"; tss_id "TSS35795"; |          |   |   |   |                                                                         |
| chr2 Cufflinks exon60338376            | 60340918 | . | + | . | gene_id "XLOC_028287"; transcript_id "TCONS_00047635"; exon_number "4"; |
| oId "CUFF.50651.6"; tss_id "TSS35795"; |          |   |   |   |                                                                         |
| chr2 Cufflinks exon60327421            | 60328165 | . | + | . | gene_id "XLOC_028287"; transcript_id "TCONS_00047639"; exon_number "1"; |
| oId "CUFF.50651.5"; tss_id "TSS35795"; |          |   |   |   |                                                                         |
| chr2 Cufflinks exon60331437            | 60334052 | . | + | . | gene_id "XLOC_028287"; transcript_id "TCONS_00047639"; exon_number "2"; |
| oId "CUFF.50651.5"; tss_id "TSS35795"; |          |   |   |   |                                                                         |
| chr2 Cufflinks exon60334676            | 60334721 | . | + | . | gene_id "XLOC_028287"; transcript_id "TCONS_00047639"; exon_number "3"; |
| oId "CUFF.50651.5"; tss_id "TSS35795"; |          |   |   |   |                                                                         |
| chr2 Cufflinks exon60383717            | 60387220 | . | + | . | gene_id "XLOC_028287"; transcript_id "TCONS_00047639"; exon_number "4"; |
| oId "CUFF.50651.5"; tss_id "TSS35795"; |          |   |   |   |                                                                         |
| chr2 Cufflinks exon60327421            | 60328165 | . | + | . | gene_id "XLOC_028287"; transcript_id "TCONS_00047638"; exon_number "1"; |
| oId "CUFF.50651.4"; tss_id "TSS35795"; |          |   |   |   |                                                                         |
| chr2 Cufflinks exon60331437            | 60334052 | . | + | . | gene_id "XLOC_028287"; transcript_id "TCONS_00047638"; exon_number "2"; |
| oId "CUFF.50651.4"; tss_id "TSS35795"; |          |   |   |   |                                                                         |
| chr2 Cufflinks exon60334676            | 60334721 | . | + | . | gene_id "XLOC_028287"; transcript_id "TCONS_00047638"; exon_number "3"; |
| oId "CUFF.50651.4"; tss_id "TSS35795"; |          |   |   |   |                                                                         |
| chr2 Cufflinks exon60383798            | 60387220 | . | + | . | gene_id "XLOC_028287"; transcript_id "TCONS_00047638"; exon_number "4"; |
| oId "CUFF.50651.4"; tss_id "TSS35795"; |          |   |   |   |                                                                         |
| chr2 Cufflinks exon60327421            | 60328165 | . | + | . | gene_id "XLOC_028287"; transcript_id "TCONS_00047637"; exon_number "1"; |
| oId "CUFF.50651.3"; tss_id "TSS35795"; |          |   |   |   |                                                                         |
| chr2 Cufflinks exon60331437            | 60334052 | . | + | . | gene_id "XLOC_028287"; transcript_id "TCONS_00047637"; exon_number "2"; |
| oId "CUFF.50651.3"; tss_id "TSS35795"; |          |   |   |   |                                                                         |
| chr2 Cufflinks exon60334676            | 60334724 | . | + | . | gene_id "XLOC_028287"; transcript_id "TCONS_00047637"; exon_number "3"; |
| oId "CUFF.50651.3"; tss_id "TSS35795"; |          |   |   |   |                                                                         |
| chr2 Cufflinks exon60383717            | 60387220 | . | + | . | gene_id "XLOC_028287"; transcript_id "TCONS_00047637"; exon_number "4"; |
| oId "CUFF.50651.3"; tss_id "TSS35795"; |          |   |   |   |                                                                         |
| chr2 Cufflinks exon60327421            | 60328165 | . | + | . | gene_id "XLOC_028287"; transcript_id "TCONS_00047636"; exon_number "1"; |
| oId "CUFF.50651.2"; tss_id "TSS35795"; |          |   |   |   |                                                                         |
| chr2 Cufflinks exon60331437            | 60334052 | . | + | . | gene_id "XLOC_028287"; transcript_id "TCONS_00047636"; exon_number "2"; |
| oId "CUFF.50651.2"; tss_id "TSS35795"; |          |   |   |   |                                                                         |
| chr2 Cufflinks exon60334676            | 60334753 | . | + | . | gene_id "XLOC_028287"; transcript_id "TCONS_00047636"; exon_number "3"; |
| oId "CUFF.50651.2"; tss_id "TSS35795"; |          |   |   |   |                                                                         |
| chr2 Cufflinks exon60383830            | 60387220 | . | + | . | gene_id "XLOC_028287"; transcript_id "TCONS_00047636"; exon_number "4"; |
| oId "CUFF.50651.2"; tss_id "TSS35795"; |          |   |   |   |                                                                         |
| chr2 Cufflinks exon60336542            | 60338630 | . | + | . | gene_id "XLOC_028287"; transcript_id "TCONS_00047640"; exon_number "1"; |
| oId "CUFF.50651.7"; tss_id "TSS35796"; |          |   |   |   |                                                                         |
| chr2 Cufflinks exon60343624            | 60344583 | . | + | . | gene_id "XLOC_028287"; transcript_id "TCONS_00047640"; exon_number "2"; |

oId "CUFF.50651.7"; tss\_id "TSS35796";  
chr2 Cufflinks exon62523502 62523581 . + . gene\_id "XLOC\_028316"; transcript\_id "TCONS\_00047683"; exon\_number "1";  
oId "CUFF.50757.3"; tss\_id "TSS35829";  
chr2 Cufflinks exon62642450 62642564 . + . gene\_id "XLOC\_028316"; transcript\_id "TCONS\_00047683"; exon\_number "2";  
oId "CUFF.50757.3"; tss\_id "TSS35829";  
chr2 Cufflinks exon62658133 62658188 . + . gene\_id "XLOC\_028316"; transcript\_id "TCONS\_00047683"; exon\_number "3";  
oId "CUFF.50757.3"; tss\_id "TSS35829";  
chr2 Cufflinks exon62658635 62659405 . + . gene\_id "XLOC\_028316"; transcript\_id "TCONS\_00047683"; exon\_number "4";  
oId "CUFF.50757.3"; tss\_id "TSS35829";  
chr2 Cufflinks exon64455535 64455656 . + . gene\_id "XLOC\_028333"; transcript\_id "TCONS\_00047711"; exon\_number "1";  
oId "CUFF.50911.3"; tss\_id "TSS35851";  
chr2 Cufflinks exon64456631 64456774 . + . gene\_id "XLOC\_028333"; transcript\_id "TCONS\_00047711"; exon\_number "2";  
oId "CUFF.50911.3"; tss\_id "TSS35851";  
chr2 Cufflinks exon64478253 64479117 . + . gene\_id "XLOC\_028333"; transcript\_id "TCONS\_00047711"; exon\_number "3";  
oId "CUFF.50911.3"; tss\_id "TSS35851";  
chr2 Cufflinks exon64479554 64480163 . + . gene\_id "XLOC\_028333"; transcript\_id "TCONS\_00047711"; exon\_number "4";  
oId "CUFF.50911.3"; tss\_id "TSS35851";  
chr2 Cufflinks exon64455535 64455656 . + . gene\_id "XLOC\_028333"; transcript\_id "TCONS\_00047712"; exon\_number "1";  
oId "CUFF.50911.4"; tss\_id "TSS35851";  
chr2 Cufflinks exon64456631 64456774 . + . gene\_id "XLOC\_028333"; transcript\_id "TCONS\_00047712"; exon\_number "2";  
oId "CUFF.50911.4"; tss\_id "TSS35851";  
chr2 Cufflinks exon64478253 64478471 . + . gene\_id "XLOC\_028333"; transcript\_id "TCONS\_00047712"; exon\_number "3";  
oId "CUFF.50911.4"; tss\_id "TSS35851";  
chr2 Cufflinks exon64478935 64479117 . + . gene\_id "XLOC\_028333"; transcript\_id "TCONS\_00047712"; exon\_number "4";  
oId "CUFF.50911.4"; tss\_id "TSS35851";  
chr2 Cufflinks exon64479554 64480163 . + . gene\_id "XLOC\_028333"; transcript\_id "TCONS\_00047712"; exon\_number "5";  
oId "CUFF.50911.4"; tss\_id "TSS35851";  
chr2 Cufflinks exon64455535 64455656 . + . gene\_id "XLOC\_028333"; transcript\_id "TCONS\_00047710"; exon\_number "1";  
oId "CUFF.50911.2"; tss\_id "TSS35851";  
chr2 Cufflinks exon64456631 64456774 . + . gene\_id "XLOC\_028333"; transcript\_id "TCONS\_00047710"; exon\_number "2";  
oId "CUFF.50911.2"; tss\_id "TSS35851";  
chr2 Cufflinks exon64478253 64478968 . + . gene\_id "XLOC\_028333"; transcript\_id "TCONS\_00047710"; exon\_number "3";  
oId "CUFF.50911.2"; tss\_id "TSS35851";  
chr2 Cufflinks exon64479554 64480163 . + . gene\_id "XLOC\_028333"; transcript\_id "TCONS\_00047710"; exon\_number "4";  
oId "CUFF.50911.2"; tss\_id "TSS35851";  
chr2 Cufflinks exon64455535 64455656 . + . gene\_id "XLOC\_028333"; transcript\_id "TCONS\_00047709"; exon\_number "1";  
oId "CUFF.50911.1"; tss\_id "TSS35851";  
chr2 Cufflinks exon64456631 64456774 . + . gene\_id "XLOC\_028333"; transcript\_id "TCONS\_00047709"; exon\_number "2";  
oId "CUFF.50911.1"; tss\_id "TSS35851";  
chr2 Cufflinks exon64478252 64478968 . + . gene\_id "XLOC\_028333"; transcript\_id "TCONS\_00047709"; exon\_number "3";  
oId "CUFF.50911.1"; tss\_id "TSS35851";  
chr2 Cufflinks exon64479554 64480163 . + . gene\_id "XLOC\_028333"; transcript\_id "TCONS\_00047709"; exon\_number "4";  
oId "CUFF.50911.1"; tss\_id "TSS35851";

chr2 Cufflinks exon64456372 64456422 . + . gene\_id "XLOC\_028333"; transcript\_id "TCONS\_00047713"; exon\_number "1";  
oId "CUFF.50911.6"; tss\_id "TSS35852";

chr2 Cufflinks exon64456631 64456774 . + . gene\_id "XLOC\_028333"; transcript\_id "TCONS\_00047713"; exon\_number "2";  
oId "CUFF.50911.6"; tss\_id "TSS35852";

chr2 Cufflinks exon64478253 64479117 . + . gene\_id "XLOC\_028333"; transcript\_id "TCONS\_00047713"; exon\_number "3";  
oId "CUFF.50911.6"; tss\_id "TSS35852";

chr2 Cufflinks exon64479554 64480163 . + . gene\_id "XLOC\_028333"; transcript\_id "TCONS\_00047713"; exon\_number "4";  
oId "CUFF.50911.6"; tss\_id "TSS35852";

chr2 Cufflinks exon67663424 67663745 . + . gene\_id "XLOC\_028359"; transcript\_id "TCONS\_00047751"; exon\_number "1";  
oId "CUFF.51058.1"; tss\_id "TSS35882";

chr2 Cufflinks exon67687008 67687154 . + . gene\_id "XLOC\_028359"; transcript\_id "TCONS\_00047751"; exon\_number "2";  
oId "CUFF.51058.1"; tss\_id "TSS35882";

chr2 Cufflinks exon67706110 67706131 . + . gene\_id "XLOC\_028359"; transcript\_id "TCONS\_00047751"; exon\_number "3";  
oId "CUFF.51058.1"; tss\_id "TSS35882";

chr2 Cufflinks exon70078558 70078600 . + . gene\_id "XLOC\_028401"; transcript\_id "TCONS\_00047818"; exon\_number "1";  
oId "CUFF.51192.1"; tss\_id "TSS35931";

chr2 Cufflinks exon70136938 70140537 . + . gene\_id "XLOC\_028401"; transcript\_id "TCONS\_00047818"; exon\_number "2";  
oId "CUFF.51192.1"; tss\_id "TSS35931";

chr2 Cufflinks exon74347448 74351208 . + . gene\_id "XLOC\_028461"; transcript\_id "TCONS\_00047927"; exon\_number "1";  
oId "CUFF.51397.3"; tss\_id "TSS36005";

chr2 Cufflinks exon74355424 74355979 . + . gene\_id "XLOC\_028461"; transcript\_id "TCONS\_00047927"; exon\_number "2";  
oId "CUFF.51397.3"; tss\_id "TSS36005";

chr2 Cufflinks exon74347448 74351208 . + . gene\_id "XLOC\_028461"; transcript\_id "TCONS\_00047928"; exon\_number "1";  
oId "CUFF.51397.1"; tss\_id "TSS36005";

chr2 Cufflinks exon74357710 74358023 . + . gene\_id "XLOC\_028461"; transcript\_id "TCONS\_00047928"; exon\_number "2";  
oId "CUFF.51397.1"; tss\_id "TSS36005";

chr2 Cufflinks exon74362368 74362532 . + . gene\_id "XLOC\_028461"; transcript\_id "TCONS\_00047928"; exon\_number "3";  
oId "CUFF.51397.1"; tss\_id "TSS36005";

chr2 Cufflinks exon74347461 74351208 . + . gene\_id "XLOC\_028461"; transcript\_id "TCONS\_00047930"; exon\_number "1";  
oId "CUFF.51397.4"; tss\_id "TSS36005";

chr2 Cufflinks exon74362368 74362532 . + . gene\_id "XLOC\_028461"; transcript\_id "TCONS\_00047930"; exon\_number "2";  
oId "CUFF.51397.4"; tss\_id "TSS36005";

chr2 Cufflinks exon85641743 85642093 . + . gene\_id "XLOC\_028517"; transcript\_id "TCONS\_00048025"; exon\_number "1";  
oId "CUFF.51712.1"; tss\_id "TSS36072";

chr2 Cufflinks exon85643217 85644084 . + . gene\_id "XLOC\_028517"; transcript\_id "TCONS\_00048025"; exon\_number "2";  
oId "CUFF.51712.1"; tss\_id "TSS36072";

chr2 Cufflinks exon86116224 86116926 . + . gene\_id "XLOC\_028530"; transcript\_id "TCONS\_00048051"; exon\_number "1";  
oId "CUFF.51756.1"; tss\_id "TSS36092";

chr2 Cufflinks exon86118299 86118328 . + . gene\_id "XLOC\_028530"; transcript\_id "TCONS\_00048051"; exon\_number "2";  
oId "CUFF.51756.1"; tss\_id "TSS36092";

chr2 Cufflinks exon 86118814 86121127 . + . gene\_id "XLOC\_028530"; transcript\_id "TCONS\_00048051";  
exon\_number "3"; oId "CUFF.51756.1"; tss\_id "TSS36092";

chr2 Cufflinks exon 86116403 86116926 . + . gene\_id "XLOC\_028530"; transcript\_id "TCONS\_00048052";

exon\_number "1"; oId "CUFF.51756.4"; tss\_id "TSS36093";  
 chr2 Cufflinks exon 86130995 86131738 . + . gene\_id "XLOC\_028530"; transcript\_id "TCONS\_00048052";  
 exon\_number "2"; oId "CUFF.51756.4"; tss\_id "TSS36093";  
 chr2 Cufflinks exon 88316318 88316810 . + . gene\_id "XLOC\_028582"; transcript\_id "TCONS\_00048128";  
 exon\_number "1"; oId "CUFF.51962.1"; tss\_id "TSS36158";  
 chr2 Cufflinks exon 88320215 88320946 . + . gene\_id "XLOC\_028582"; transcript\_id "TCONS\_00048128";  
 exon\_number "2"; oId "CUFF.51962.1"; tss\_id "TSS36158";  
 chr2 Cufflinks exon 95739994 95740906 . + . gene\_id "XLOC\_028596"; transcript\_id "TCONS\_00048145";  
 exon\_number "1"; oId "CUFF.52031.2"; tss\_id "TSS36174";  
 chr2 Cufflinks exon 95741489 95741661 . + . gene\_id "XLOC\_028596"; transcript\_id "TCONS\_00048145";  
 exon\_number "2"; oId "CUFF.52031.2"; tss\_id "TSS36174";  
 chr2 Cufflinks exon 95741859 95742097 . + . gene\_id "XLOC\_028596"; transcript\_id "TCONS\_00048145";  
 exon\_number "3"; oId "CUFF.52031.2"; tss\_id "TSS36174";  
 chr2 Cufflinks exon 95739994 95741661 . + . gene\_id "XLOC\_028596"; transcript\_id "TCONS\_00048144";  
 exon\_number "1"; oId "CUFF.52031.1"; tss\_id "TSS36174";  
 chr2 Cufflinks exon 95741859 95742097 . + . gene\_id "XLOC\_028596"; transcript\_id "TCONS\_00048144";  
 exon\_number "2"; oId "CUFF.52031.1"; tss\_id "TSS36174";  
 chr2 Cufflinks exon 96192542 96192981 . + . gene\_id "XLOC\_028610"; transcript\_id "TCONS\_00048183";  
 exon\_number "1"; oId "CUFF.52066.3"; tss\_id "TSS36196";  
 chr2 Cufflinks exon 96194966 96206999 . + . gene\_id "XLOC\_028610"; transcript\_id "TCONS\_00048183";  
 exon\_number "2"; oId "CUFF.52066.3"; tss\_id "TSS36196";  
 chr2 Cufflinks exon 96192542 96192967 . + . gene\_id "XLOC\_028610"; transcript\_id "TCONS\_00048182";  
 exon\_number "1"; oId "CUFF.52066.2"; tss\_id "TSS36196";  
 chr2 Cufflinks exon 96194966 96206999 . + . gene\_id "XLOC\_028610"; transcript\_id "TCONS\_00048182";  
 exon\_number "2"; oId "CUFF.52066.2"; tss\_id "TSS36196";  
 chr2 Cufflinks exon 96194926 96195103 . + . gene\_id "XLOC\_028610"; transcript\_id "TCONS\_00048184";  
 exon\_number "1"; oId "CUFF.52066.4"; tss\_id "TSS36197";  
 chr2 Cufflinks exon 96195819 96206999 . + . gene\_id "XLOC\_028610"; transcript\_id "TCONS\_00048184";  
 exon\_number "2"; oId "CUFF.52066.4"; tss\_id "TSS36197";  
 chr2 Cufflinks exon 97947894 97950522 . + . gene\_id "XLOC\_028645"; transcript\_id "TCONS\_00048246";  
 exon\_number "1"; oId "CUFF.52205.1"; tss\_id "TSS36241";  
 chr2 Cufflinks exon 97950615 97950744 . + . gene\_id "XLOC\_028645"; transcript\_id "TCONS\_00048246";  
 exon\_number "2"; oId "CUFF.52205.1"; tss\_id "TSS36241";  
 chr2 Cufflinks exon 97951040 97951260 . + . gene\_id "XLOC\_028645"; transcript\_id "TCONS\_00048246";  
 exon\_number "3"; oId "CUFF.52205.1"; tss\_id "TSS36241";  
 chr2 Cufflinks exon 97957294 97957632 . + . gene\_id "XLOC\_028645"; transcript\_id "TCONS\_00048246";  
 exon\_number "4"; oId "CUFF.52205.1"; tss\_id "TSS36241";  
 chr2 Cufflinks exon 97948005 97950522 . + . gene\_id "XLOC\_028645"; transcript\_id "TCONS\_00048247";  
 exon\_number "1"; oId "CUFF.52205.3"; tss\_id "TSS36242";  
 chr2 Cufflinks exon 97950615 97950744 . + . gene\_id "XLOC\_028645"; transcript\_id "TCONS\_00048247";  
 exon\_number "2"; oId "CUFF.52205.3"; tss\_id "TSS36242";  
 chr2 Cufflinks exon 97957294 97957632 . + . gene\_id "XLOC\_028645"; transcript\_id "TCONS\_00048247";  
 exon\_number "3"; oId "CUFF.52205.3"; tss\_id "TSS36242";



chr2 Cufflinks exon 97948038 97950522 . + . gene\_id "XLOC\_028645"; transcript\_id "TCONS\_00048248";  
exon\_number "1"; oId "CUFF.52205.4"; tss\_id "TSS36242";

chr2 Cufflinks exon 97950615 97950749 . + . gene\_id "XLOC\_028645"; transcript\_id "TCONS\_00048248";  
exon\_number "2"; oId "CUFF.52205.4"; tss\_id "TSS36242";

chr2 Cufflinks exon 97951045 97951146 . + . gene\_id "XLOC\_028645"; transcript\_id "TCONS\_00048248";  
exon\_number "3"; oId "CUFF.52205.4"; tss\_id "TSS36242";

chr2 Cufflinks exon 98284014 98284536 . + . gene\_id "XLOC\_028649"; transcript\_id "TCONS\_00048253";  
exon\_number "1"; oId "CUFF.52241.2"; tss\_id "TSS36246";

chr2 Cufflinks exon 98284884 98286297 . + . gene\_id "XLOC\_028649"; transcript\_id "TCONS\_00048253";  
exon\_number "2"; oId "CUFF.52241.2"; tss\_id "TSS36246";

chr2 Cufflinks exon 98287053 98287152 . + . gene\_id "XLOC\_028649"; transcript\_id "TCONS\_00048253";  
exon\_number "3"; oId "CUFF.52241.2"; tss\_id "TSS36246";

chr2 Cufflinks exon 98287794 98287962 . + . gene\_id "XLOC\_028649"; transcript\_id "TCONS\_00048253";  
exon\_number "4"; oId "CUFF.52241.2"; tss\_id "TSS36246";

chr2 Cufflinks exon98290919 98291020 . + . gene\_id "XLOC\_028649"; transcript\_id "TCONS\_00048253"; exon\_number "5";  
oId "CUFF.52241.2"; tss\_id "TSS36246";

chr2 Cufflinks exon98292094 98292184 . + . gene\_id "XLOC\_028649"; transcript\_id "TCONS\_00048253"; exon\_number "6";  
oId "CUFF.52241.2"; tss\_id "TSS36246";

chr2 Cufflinks exon98292308 98292391 . + . gene\_id "XLOC\_028649"; transcript\_id "TCONS\_00048253"; exon\_number "7";  
oId "CUFF.52241.2"; tss\_id "TSS36246";

chr2 Cufflinks exon98306719 98306790 . + . gene\_id "XLOC\_028649"; transcript\_id "TCONS\_00048253"; exon\_number "8";  
oId "CUFF.52241.2"; tss\_id "TSS36246";

chr2 Cufflinks exon98315489 98315599 . + . gene\_id "XLOC\_028649"; transcript\_id "TCONS\_00048253"; exon\_number "9";  
oId "CUFF.52241.2"; tss\_id "TSS36246";

chr2 Cufflinks exon98319132 98319656 . + . gene\_id "XLOC\_028649"; transcript\_id "TCONS\_00048253"; exon\_number "10";  
oId "CUFF.52241.2"; tss\_id "TSS36246";

chr2 Cufflinks exon98284014 98284536 . + . gene\_id "XLOC\_028649"; transcript\_id "TCONS\_00048252"; exon\_number "1";  
oId "CUFF.52241.1"; tss\_id "TSS36246";

chr2 Cufflinks exon98284884 98286297 . + . gene\_id "XLOC\_028649"; transcript\_id "TCONS\_00048252"; exon\_number "2";  
oId "CUFF.52241.1"; tss\_id "TSS36246";

chr2 Cufflinks exon98287794 98287962 . + . gene\_id "XLOC\_028649"; transcript\_id "TCONS\_00048252"; exon\_number "3";  
oId "CUFF.52241.1"; tss\_id "TSS36246";

chr2 Cufflinks exon98290919 98291020 . + . gene\_id "XLOC\_028649"; transcript\_id "TCONS\_00048252"; exon\_number "4";  
oId "CUFF.52241.1"; tss\_id "TSS36246";

chr2 Cufflinks exon98292308 98292391 . + . gene\_id "XLOC\_028649"; transcript\_id "TCONS\_00048252"; exon\_number "5";  
oId "CUFF.52241.1"; tss\_id "TSS36246";

chr2 Cufflinks exon98306719 98306790 . + . gene\_id "XLOC\_028649"; transcript\_id "TCONS\_00048252"; exon\_number "6";  
oId "CUFF.52241.1"; tss\_id "TSS36246";

chr2 Cufflinks exon98315489 98315599 . + . gene\_id "XLOC\_028649"; transcript\_id "TCONS\_00048252"; exon\_number "7";  
oId "CUFF.52241.1"; tss\_id "TSS36246";

chr2 Cufflinks exon98317617 98317767 . + . gene\_id "XLOC\_028649"; transcript\_id "TCONS\_00048252"; exon\_number "8";  
oId "CUFF.52241.1"; tss\_id "TSS36246";

chr2 Cufflinks exon98319132 98319656 . + . gene\_id "XLOC\_028649"; transcript\_id "TCONS\_00048252"; exon\_number "9";

oId "CUFF.52241.1"; tss\_id "TSS36246";  
chr2 Cufflinks exon98286206 98286297 . + . gene\_id "XLOC\_028649"; transcript\_id "TCONS\_00048254"; exon\_number "1";  
oId "CUFF.52241.3"; tss\_id "TSS36247";  
chr2 Cufflinks exon98287794 98287962 . + . gene\_id "XLOC\_028649"; transcript\_id "TCONS\_00048254"; exon\_number "2";  
oId "CUFF.52241.3"; tss\_id "TSS36247";  
chr2 Cufflinks exon98290919 98291020 . + . gene\_id "XLOC\_028649"; transcript\_id "TCONS\_00048254"; exon\_number "3";  
oId "CUFF.52241.3"; tss\_id "TSS36247";  
chr2 Cufflinks exon98292094 98292184 . + . gene\_id "XLOC\_028649"; transcript\_id "TCONS\_00048254"; exon\_number "4";  
oId "CUFF.52241.3"; tss\_id "TSS36247";  
chr2 Cufflinks exon98292308 98292391 . + . gene\_id "XLOC\_028649"; transcript\_id "TCONS\_00048254"; exon\_number "5";  
oId "CUFF.52241.3"; tss\_id "TSS36247";  
chr2 Cufflinks exon98305358 98305456 . + . gene\_id "XLOC\_028649"; transcript\_id "TCONS\_00048254"; exon\_number "6";  
oId "CUFF.52241.3"; tss\_id "TSS36247";  
chr2 Cufflinks exon98306719 98306790 . + . gene\_id "XLOC\_028649"; transcript\_id "TCONS\_00048254"; exon\_number "7";  
oId "CUFF.52241.3"; tss\_id "TSS36247";  
chr2 Cufflinks exon98315489 98315599 . + . gene\_id "XLOC\_028649"; transcript\_id "TCONS\_00048254"; exon\_number "8";  
oId "CUFF.52241.3"; tss\_id "TSS36247";  
chr2 Cufflinks exon98317617 98317767 . + . gene\_id "XLOC\_028649"; transcript\_id "TCONS\_00048254"; exon\_number "9";  
oId "CUFF.52241.3"; tss\_id "TSS36247";  
chr2 Cufflinks exon98319132 98319656 . + . gene\_id "XLOC\_028649"; transcript\_id "TCONS\_00048254"; exon\_number "10";  
oId "CUFF.52241.3"; tss\_id "TSS36247";  
chr2 Cufflinks exon98287988 98291020 . + . gene\_id "XLOC\_028649"; transcript\_id "TCONS\_00048256"; exon\_number "1";  
oId "CUFF.52241.4"; tss\_id "TSS36248";  
chr2 Cufflinks exon98292094 98292184 . + . gene\_id "XLOC\_028649"; transcript\_id "TCONS\_00048256"; exon\_number "2";  
oId "CUFF.52241.4"; tss\_id "TSS36248";  
chr2 Cufflinks exon98292308 98292391 . + . gene\_id "XLOC\_028649"; transcript\_id "TCONS\_00048256"; exon\_number "3";  
oId "CUFF.52241.4"; tss\_id "TSS36248";  
chr2 Cufflinks exon98305358 98305456 . + . gene\_id "XLOC\_028649"; transcript\_id "TCONS\_00048256"; exon\_number "4";  
oId "CUFF.52241.4"; tss\_id "TSS36248";  
chr2 Cufflinks exon98306719 98306790 . + . gene\_id "XLOC\_028649"; transcript\_id "TCONS\_00048256"; exon\_number "5";  
oId "CUFF.52241.4"; tss\_id "TSS36248";  
chr2 Cufflinks exon98315489 98315599 . + . gene\_id "XLOC\_028649"; transcript\_id "TCONS\_00048256"; exon\_number "6";  
oId "CUFF.52241.4"; tss\_id "TSS36248";  
chr2 Cufflinks exon98317617 98317767 . + . gene\_id "XLOC\_028649"; transcript\_id "TCONS\_00048256"; exon\_number "7";  
oId "CUFF.52241.4"; tss\_id "TSS36248";  
chr2 Cufflinks exon98319132 98319656 . + . gene\_id "XLOC\_028649"; transcript\_id "TCONS\_00048256"; exon\_number "8";  
oId "CUFF.52241.4"; tss\_id "TSS36248";  
chr2 Cufflinks exon99347672 99348158 . + . gene\_id "XLOC\_028678"; transcript\_id "TCONS\_00048293"; exon\_number "1";  
oId "CUFF.52281.2"; tss\_id "TSS36281";  
chr2 Cufflinks exon99367783 99368065 . + . gene\_id "XLOC\_028678"; transcript\_id "TCONS\_00048293"; exon\_number "2";  
oId "CUFF.52281.2"; tss\_id "TSS36281";  
chr2 Cufflinks exon99347672 99348158 . + . gene\_id "XLOC\_028678"; transcript\_id "TCONS\_00048292"; exon\_number "1";  
oId "CUFF.52281.1"; tss\_id "TSS36281";

|                                        |           |   |   |   |                                                                         |
|----------------------------------------|-----------|---|---|---|-------------------------------------------------------------------------|
| chr2 Cufflinks exon99356173            | 99368065  | . | + | . | gene_id "XLOC_028678"; transcript_id "TCONS_00048292"; exon_number "2"; |
| oId "CUFF.52281.1"; tss_id "TSS36281"; |           |   |   |   |                                                                         |
| chr2 Cufflinks exon99348136            | 99348158  | . | + | . | gene_id "XLOC_028678"; transcript_id "TCONS_00048294"; exon_number "1"; |
| oId "CUFF.52281.3"; tss_id "TSS36282"; |           |   |   |   |                                                                         |
| chr2 Cufflinks exon99352618            | 99356114  | . | + | . | gene_id "XLOC_028678"; transcript_id "TCONS_00048294"; exon_number "2"; |
| oId "CUFF.52281.3"; tss_id "TSS36282"; |           |   |   |   |                                                                         |
| chr2 Cufflinks exon102230953           | 102231155 | . | + | . | gene_id "XLOC_028703"; transcript_id "TCONS_00048332"; exon_number "1"; |
| oId "CUFF.52441.1"; tss_id "TSS36313"; |           |   |   |   |                                                                         |
| chr2 Cufflinks exon102231744           | 102231982 | . | + | . | gene_id "XLOC_028703"; transcript_id "TCONS_00048332"; exon_number "2"; |
| oId "CUFF.52441.1"; tss_id "TSS36313"; |           |   |   |   |                                                                         |
| chr2 Cufflinks exon102232925           | 102233205 | . | + | . | gene_id "XLOC_028703"; transcript_id "TCONS_00048332"; exon_number "3"; |
| oId "CUFF.52441.1"; tss_id "TSS36313"; |           |   |   |   |                                                                         |
| chr2 Cufflinks exon102238687           | 102238914 | . | + | . | gene_id "XLOC_028703"; transcript_id "TCONS_00048332"; exon_number "4"; |
| oId "CUFF.52441.1"; tss_id "TSS36313"; |           |   |   |   |                                                                         |
| chr2 Cufflinks exon102239062           | 102239200 | . | + | . | gene_id "XLOC_028703"; transcript_id "TCONS_00048332"; exon_number "5"; |
| oId "CUFF.52441.1"; tss_id "TSS36313"; |           |   |   |   |                                                                         |
| chr2 Cufflinks exon102240235           | 102240539 | . | + | . | gene_id "XLOC_028703"; transcript_id "TCONS_00048332"; exon_number "6"; |
| oId "CUFF.52441.1"; tss_id "TSS36313"; |           |   |   |   |                                                                         |
| chr2 Cufflinks exon102231111           | 102231155 | . | + | . | gene_id "XLOC_028703"; transcript_id "TCONS_00048333"; exon_number "1"; |
| oId "CUFF.52441.2"; tss_id "TSS36314"; |           |   |   |   |                                                                         |
| chr2 Cufflinks exon102232925           | 102233205 | . | + | . | gene_id "XLOC_028703"; transcript_id "TCONS_00048333"; exon_number "2"; |
| oId "CUFF.52441.2"; tss_id "TSS36314"; |           |   |   |   |                                                                         |
| chr2 Cufflinks exon102238687           | 102238914 | . | + | . | gene_id "XLOC_028703"; transcript_id "TCONS_00048333"; exon_number "3"; |
| oId "CUFF.52441.2"; tss_id "TSS36314"; |           |   |   |   |                                                                         |
| chr2 Cufflinks exon102239062           | 102239200 | . | + | . | gene_id "XLOC_028703"; transcript_id "TCONS_00048333"; exon_number "4"; |
| oId "CUFF.52441.2"; tss_id "TSS36314"; |           |   |   |   |                                                                         |
| chr2 Cufflinks exon102240235           | 102240539 | . | + | . | gene_id "XLOC_028703"; transcript_id "TCONS_00048333"; exon_number "5"; |
| oId "CUFF.52441.2"; tss_id "TSS36314"; |           |   |   |   |                                                                         |
| chr2 Cufflinks exon105277761           | 105278110 | . | + | . | gene_id "XLOC_028742"; transcript_id "TCONS_00048399"; exon_number "1"; |
| oId "CUFF.52499.1"; tss_id "TSS36363"; |           |   |   |   |                                                                         |
| chr2 Cufflinks exon105279203           | 105279926 | . | + | . | gene_id "XLOC_028742"; transcript_id "TCONS_00048399"; exon_number "2"; |
| oId "CUFF.52499.1"; tss_id "TSS36363"; |           |   |   |   |                                                                         |
| chr2 Cufflinks exon105277761           | 105278110 | . | + | . | gene_id "XLOC_028742"; transcript_id "TCONS_00048400"; exon_number "1"; |
| oId "CUFF.52499.2"; tss_id "TSS36363"; |           |   |   |   |                                                                         |
| chr2 Cufflinks exon105279203           | 105279354 | . | + | . | gene_id "XLOC_028742"; transcript_id "TCONS_00048400"; exon_number "2"; |
| oId "CUFF.52499.2"; tss_id "TSS36363"; |           |   |   |   |                                                                         |
| chr2 Cufflinks exon105282188           | 105284074 | . | + | . | gene_id "XLOC_028742"; transcript_id "TCONS_00048400"; exon_number "3"; |
| oId "CUFF.52499.2"; tss_id "TSS36363"; |           |   |   |   |                                                                         |
| chr2 Cufflinks exon107120748           | 107120781 | . | + | . | gene_id "XLOC_028767"; transcript_id "TCONS_00048431"; exon_number "1"; |
| oId "CUFF.52569.1"; tss_id "TSS36391"; |           |   |   |   |                                                                         |
| chr2 Cufflinks exon107121304           | 107121517 | . | + | . | gene_id "XLOC_028767"; transcript_id "TCONS_00048431"; exon_number "2"; |
| oId "CUFF.52569.1"; tss_id "TSS36391"; |           |   |   |   |                                                                         |
| chr2 Cufflinks exon109478954           | 109478964 | . | + | . | gene_id "XLOC_028778"; transcript_id "TCONS_00048469"; exon_number "1"; |

oId "CUFF.52613.8"; tss\_id "TSS36416";  
chr2 Cufflinks exon109499766 109502629 . + . gene\_id "XLOC\_028778"; transcript\_id "TCONS\_00048469"; exon\_number "2";  
oId "CUFF.52613.8"; tss\_id "TSS36416";  
chr2 Cufflinks exon112465186 112466801 . + . gene\_id "XLOC\_028796"; transcript\_id "TCONS\_00048509"; exon\_number "1";  
oId "CUFF.52729.1"; tss\_id "TSS36440";  
chr2 Cufflinks exon112468519 112468859 . + . gene\_id "XLOC\_028796"; transcript\_id "TCONS\_00048509"; exon\_number "2";  
oId "CUFF.52729.1"; tss\_id "TSS36440";  
chr2 Cufflinks exon118900127 118900606 . + . gene\_id "XLOC\_028867"; transcript\_id "TCONS\_00048638"; exon\_number "1";  
oId "CUFF.52993.2"; tss\_id "TSS36535";  
chr2 Cufflinks exon119014417 119014493 . + . gene\_id "XLOC\_028867"; transcript\_id "TCONS\_00048638"; exon\_number "2";  
oId "CUFF.52993.2"; tss\_id "TSS36535";  
chr2 Cufflinks exon119250402 119254619 . + . gene\_id "XLOC\_028867"; transcript\_id "TCONS\_00048638"; exon\_number "3";  
oId "CUFF.52993.2"; tss\_id "TSS36535";  
chr2 Cufflinks exon119254751 119264757 . + . gene\_id "XLOC\_028867"; transcript\_id "TCONS\_00048638"; exon\_number "4";  
oId "CUFF.52993.2"; tss\_id "TSS36535";  
chr2 Cufflinks exon118900127 118900606 . + . gene\_id "XLOC\_028867"; transcript\_id "TCONS\_00048637"; exon\_number "1";  
oId "CUFF.52993.1"; tss\_id "TSS36535";  
chr2 Cufflinks exon119014417 119014493 . + . gene\_id "XLOC\_028867"; transcript\_id "TCONS\_00048637"; exon\_number "2";  
oId "CUFF.52993.1"; tss\_id "TSS36535";  
chr2 Cufflinks exon119072889 119073023 . + . gene\_id "XLOC\_028867"; transcript\_id "TCONS\_00048637"; exon\_number "3";  
oId "CUFF.52993.1"; tss\_id "TSS36535";  
chr2 Cufflinks exon119221730 119221862 . + . gene\_id "XLOC\_028867"; transcript\_id "TCONS\_00048637"; exon\_number "4";  
oId "CUFF.52993.1"; tss\_id "TSS36535";  
chr2 Cufflinks exon119250402 119254619 . + . gene\_id "XLOC\_028867"; transcript\_id "TCONS\_00048637"; exon\_number "5";  
oId "CUFF.52993.1"; tss\_id "TSS36535";  
chr2 Cufflinks exon119254751 119264757 . + . gene\_id "XLOC\_028867"; transcript\_id "TCONS\_00048637"; exon\_number "6";  
oId "CUFF.52993.1"; tss\_id "TSS36535";  
chr2 Cufflinks exon118900205 118900606 . + . gene\_id "XLOC\_028867"; transcript\_id "TCONS\_00048639"; exon\_number "1";  
oId "CUFF.52993.3"; tss\_id "TSS36535";  
chr2 Cufflinks exon119014417 119014493 . + . gene\_id "XLOC\_028867"; transcript\_id "TCONS\_00048639"; exon\_number "2";  
oId "CUFF.52993.3"; tss\_id "TSS36535";  
chr2 Cufflinks exon119221730 119221862 . + . gene\_id "XLOC\_028867"; transcript\_id "TCONS\_00048639"; exon\_number "3";  
oId "CUFF.52993.3"; tss\_id "TSS36535";  
chr2 Cufflinks exon119250402 119254619 . + . gene\_id "XLOC\_028867"; transcript\_id "TCONS\_00048639"; exon\_number "4";  
oId "CUFF.52993.3"; tss\_id "TSS36535";  
chr2 Cufflinks exon119254751 119264757 . + . gene\_id "XLOC\_028867"; transcript\_id "TCONS\_00048639"; exon\_number "5";  
oId "CUFF.52993.3"; tss\_id "TSS36535";  
chr2 Cufflinks exon118903562 118903610 . + . gene\_id "XLOC\_028867"; transcript\_id "TCONS\_00048640"; exon\_number "1";  
oId "CUFF.52993.6"; tss\_id "TSS36536";  
chr2 Cufflinks exon119014417 119014493 . + . gene\_id "XLOC\_028867"; transcript\_id "TCONS\_00048640"; exon\_number "2";  
oId "CUFF.52993.6"; tss\_id "TSS36536";  
chr2 Cufflinks exon119221730 119221862 . + . gene\_id "XLOC\_028867"; transcript\_id "TCONS\_00048640"; exon\_number "3";  
oId "CUFF.52993.6"; tss\_id "TSS36536";

|                                        |           |   |   |   |                                                                         |
|----------------------------------------|-----------|---|---|---|-------------------------------------------------------------------------|
| chr2 Cufflinks exon119250402           | 119252857 | . | + | . | gene_id "XLOC_028867"; transcript_id "TCONS_00048640"; exon_number "4"; |
| oId "CUFF.52993.6"; tss_id "TSS36536"; |           |   |   |   |                                                                         |
| chr2 Cufflinks exon119253680           | 119254620 | . | + | . | gene_id "XLOC_028867"; transcript_id "TCONS_00048640"; exon_number "5"; |
| oId "CUFF.52993.6"; tss_id "TSS36536"; |           |   |   |   |                                                                         |
| chr2 Cufflinks exon119254751           | 119255605 | . | + | . | gene_id "XLOC_028867"; transcript_id "TCONS_00048640"; exon_number "6"; |
| oId "CUFF.52993.6"; tss_id "TSS36536"; |           |   |   |   |                                                                         |
| chr2 Cufflinks exon119263318           | 119263469 | . | + | . | gene_id "XLOC_028867"; transcript_id "TCONS_00048640"; exon_number "7"; |
| oId "CUFF.52993.6"; tss_id "TSS36536"; |           |   |   |   |                                                                         |
| chr2 Cufflinks exon119264902           | 119264961 | . | + | . | gene_id "XLOC_028867"; transcript_id "TCONS_00048640"; exon_number "8"; |
| oId "CUFF.52993.6"; tss_id "TSS36536"; |           |   |   |   |                                                                         |
| chr2 Cufflinks exon119277272           | 119278276 | . | + | . | gene_id "XLOC_028867"; transcript_id "TCONS_00048640"; exon_number "9"; |
| oId "CUFF.52993.6"; tss_id "TSS36536"; |           |   |   |   |                                                                         |
| chr2 Cufflinks exon122407230           | 122407957 | . | + | . | gene_id "XLOC_028942"; transcript_id "TCONS_00048728"; exon_number "1"; |
| oId "CUFF.53131.1"; tss_id "TSS36616"; |           |   |   |   |                                                                         |
| chr2 Cufflinks exon122408044           | 122409114 | . | + | . | gene_id "XLOC_028942"; transcript_id "TCONS_00048728"; exon_number "2"; |
| oId "CUFF.53131.1"; tss_id "TSS36616"; |           |   |   |   |                                                                         |
| chr2 Cufflinks exon122553931           | 122554296 | . | + | . | gene_id "XLOC_028951"; transcript_id "TCONS_00048737"; exon_number "1"; |
| oId "CUFF.53163.3"; tss_id "TSS36625"; |           |   |   |   |                                                                         |
| chr2 Cufflinks exon122625095           | 122626161 | . | + | . | gene_id "XLOC_028951"; transcript_id "TCONS_00048737"; exon_number "2"; |
| oId "CUFF.53163.3"; tss_id "TSS36625"; |           |   |   |   |                                                                         |
| chr2 Cufflinks exon122659811           | 122660565 | . | + | . | gene_id "XLOC_028958"; transcript_id "TCONS_00048744"; exon_number "1"; |
| oId "CUFF.53179.1"; tss_id "TSS36632"; |           |   |   |   |                                                                         |
| chr2 Cufflinks exon122701910           | 122702023 | . | + | . | gene_id "XLOC_028958"; transcript_id "TCONS_00048744"; exon_number "2"; |
| oId "CUFF.53179.1"; tss_id "TSS36632"; |           |   |   |   |                                                                         |
| chr2 Cufflinks exon122797767           | 122797882 | . | + | . | gene_id "XLOC_028958"; transcript_id "TCONS_00048744"; exon_number "3"; |
| oId "CUFF.53179.1"; tss_id "TSS36632"; |           |   |   |   |                                                                         |
| chr2 Cufflinks exon122798609           | 122800885 | . | + | . | gene_id "XLOC_028958"; transcript_id "TCONS_00048744"; exon_number "4"; |
| oId "CUFF.53179.1"; tss_id "TSS36632"; |           |   |   |   |                                                                         |
| chr2 Cufflinks exon122659811           | 122660565 | . | + | . | gene_id "XLOC_028958"; transcript_id "TCONS_00048745"; exon_number "1"; |
| oId "CUFF.53179.2"; tss_id "TSS36632"; |           |   |   |   |                                                                         |
| chr2 Cufflinks exon122701910           | 122702023 | . | + | . | gene_id "XLOC_028958"; transcript_id "TCONS_00048745"; exon_number "2"; |
| oId "CUFF.53179.2"; tss_id "TSS36632"; |           |   |   |   |                                                                         |
| chr2 Cufflinks exon122978395           | 122978495 | . | + | . | gene_id "XLOC_028958"; transcript_id "TCONS_00048745"; exon_number "3"; |
| oId "CUFF.53179.2"; tss_id "TSS36632"; |           |   |   |   |                                                                         |
| chr2 Cufflinks exon122979851           | 122979900 | . | + | . | gene_id "XLOC_028958"; transcript_id "TCONS_00048745"; exon_number "4"; |
| oId "CUFF.53179.2"; tss_id "TSS36632"; |           |   |   |   |                                                                         |
| chr2 Cufflinks exon123150539           | 123150617 | . | + | . | gene_id "XLOC_028958"; transcript_id "TCONS_00048745"; exon_number "5"; |
| oId "CUFF.53179.2"; tss_id "TSS36632"; |           |   |   |   |                                                                         |
| chr2 Cufflinks exon123154890           | 123164949 | . | + | . | gene_id "XLOC_028958"; transcript_id "TCONS_00048745"; exon_number "6"; |
| oId "CUFF.53179.2"; tss_id "TSS36632"; |           |   |   |   |                                                                         |
| chr2 Cufflinks exon122893711           | 122894007 | . | + | . | gene_id "XLOC_028958"; transcript_id "TCONS_00048770"; exon_number "1"; |
| oId "CUFF.53179.3"; tss_id "TSS36633"; |           |   |   |   |                                                                         |
| chr2 Cufflinks exon122978395           | 122978495 | . | + | . | gene_id "XLOC_028958"; transcript_id "TCONS_00048770"; exon_number "2"; |

oId "CUFF.53179.3"; tss\_id "TSS36633";  
chr2 Cufflinks exon122979851 122979901 . + . gene\_id "XLOC\_028958"; transcript\_id "TCONS\_00048770"; exon\_number "3";  
oId "CUFF.53179.3"; tss\_id "TSS36633";  
chr2 Cufflinks exon129194387 129194611 . + . gene\_id "XLOC\_029060"; transcript\_id "TCONS\_00048863"; exon\_number "1";  
oId "CUFF.53491.2"; tss\_id "TSS36741";  
chr2 Cufflinks exon129195560 129196860 . + . gene\_id "XLOC\_029060"; transcript\_id "TCONS\_00048863"; exon\_number "2";  
oId "CUFF.53491.2"; tss\_id "TSS36741";  
chr2 Cufflinks exon129194387 129194611 . + . gene\_id "XLOC\_029060"; transcript\_id "TCONS\_00048862"; exon\_number "1";  
oId "CUFF.53491.1"; tss\_id "TSS36741";  
chr2 Cufflinks exon129195558 129196860 . + . gene\_id "XLOC\_029060"; transcript\_id "TCONS\_00048862"; exon\_number "2";  
oId "CUFF.53491.1"; tss\_id "TSS36741";  
chr2 Cufflinks exon129491941 129492338 . + . gene\_id "XLOC\_029069"; transcript\_id "TCONS\_00048873"; exon\_number "1";  
oId "CUFF.53526.1"; tss\_id "TSS36750";  
chr2 Cufflinks exon129492455 129501326 . + . gene\_id "XLOC\_029069"; transcript\_id "TCONS\_00048873"; exon\_number "2";  
oId "CUFF.53526.1"; tss\_id "TSS36750";  
chr2 Cufflinks exon132160474 132160824 . + . gene\_id "XLOC\_029094"; transcript\_id "TCONS\_00048910"; exon\_number "1";  
oId "CUFF.53602.2"; tss\_id "TSS36779";  
chr2 Cufflinks exon132162786 132165105 . + . gene\_id "XLOC\_029094"; transcript\_id "TCONS\_00048910"; exon\_number "2";  
oId "CUFF.53602.2"; tss\_id "TSS36779";  
chr2 Cufflinks exon132165418 132172072 . + . gene\_id "XLOC\_029094"; transcript\_id "TCONS\_00048910"; exon\_number "3";  
oId "CUFF.53602.2"; tss\_id "TSS36779";  
chr2 Cufflinks exon132160474 132160824 . + . gene\_id "XLOC\_029094"; transcript\_id "TCONS\_00048909"; exon\_number "1";  
oId "CUFF.53602.1"; tss\_id "TSS36779";  
chr2 Cufflinks exon132162786 132163020 . + . gene\_id "XLOC\_029094"; transcript\_id "TCONS\_00048909"; exon\_number "2";  
oId "CUFF.53602.1"; tss\_id "TSS36779";  
chr2 Cufflinks exon132165036 132165105 . + . gene\_id "XLOC\_029094"; transcript\_id "TCONS\_00048909"; exon\_number "3";  
oId "CUFF.53602.1"; tss\_id "TSS36779";  
chr2 Cufflinks exon132165418 132172072 . + . gene\_id "XLOC\_029094"; transcript\_id "TCONS\_00048909"; exon\_number "4";  
oId "CUFF.53602.1"; tss\_id "TSS36779";  
chr2 Cufflinks exon132162507 132163020 . + . gene\_id "XLOC\_029094"; transcript\_id "TCONS\_00048912"; exon\_number "1";  
oId "CUFF.53602.4"; tss\_id "TSS36780";  
chr2 Cufflinks exon132165036 132165105 . + . gene\_id "XLOC\_029094"; transcript\_id "TCONS\_00048912"; exon\_number "2";  
oId "CUFF.53602.4"; tss\_id "TSS36780";  
chr2 Cufflinks exon132165418 132165586 . + . gene\_id "XLOC\_029094"; transcript\_id "TCONS\_00048912"; exon\_number "3";  
oId "CUFF.53602.4"; tss\_id "TSS36780";  
chr2 Cufflinks exon132167246 132172072 . + . gene\_id "XLOC\_029094"; transcript\_id "TCONS\_00048912"; exon\_number "4";  
oId "CUFF.53602.4"; tss\_id "TSS36780";  
chr2 Cufflinks exon132162507 132163020 . + . gene\_id "XLOC\_029094"; transcript\_id "TCONS\_00048911"; exon\_number "1";  
oId "CUFF.53602.3"; tss\_id "TSS36780";  
chr2 Cufflinks exon132165036 132165105 . + . gene\_id "XLOC\_029094"; transcript\_id "TCONS\_00048911"; exon\_number "2";  
oId "CUFF.53602.3"; tss\_id "TSS36780";  
chr2 Cufflinks exon132165418 132172072 . + . gene\_id "XLOC\_029094"; transcript\_id "TCONS\_00048911"; exon\_number "3";  
oId "CUFF.53602.3"; tss\_id "TSS36780";

|                                        |           |   |   |   |                                                                         |
|----------------------------------------|-----------|---|---|---|-------------------------------------------------------------------------|
| chr2 Cufflinks exon132162575           | 132165105 | . | + | . | gene_id "XLOC_029094"; transcript_id "TCONS_00048913"; exon_number "1"; |
| oId "CUFF.53602.5"; tss_id "TSS36780"; |           |   |   |   |                                                                         |
| chr2 Cufflinks exon132165418           | 132172072 | . | + | . | gene_id "XLOC_029094"; transcript_id "TCONS_00048913"; exon_number "2"; |
| oId "CUFF.53602.5"; tss_id "TSS36780"; |           |   |   |   |                                                                         |
| chr2 Cufflinks exon154367421           | 154367490 | . | + | . | gene_id "XLOC_029241"; transcript_id "TCONS_00049109"; exon_number "1"; |
| oId "CUFF.54032.1"; tss_id "TSS36944"; |           |   |   |   |                                                                         |
| chr2 Cufflinks exon154589282           | 154589343 | . | + | . | gene_id "XLOC_029241"; transcript_id "TCONS_00049109"; exon_number "2"; |
| oId "CUFF.54032.1"; tss_id "TSS36944"; |           |   |   |   |                                                                         |
| chr2 Cufflinks exon154669235           | 154669480 | . | + | . | gene_id "XLOC_029241"; transcript_id "TCONS_00049109"; exon_number "3"; |
| oId "CUFF.54032.1"; tss_id "TSS36944"; |           |   |   |   |                                                                         |
| chr2 Cufflinks exon156000641           | 156000692 | . | + | . | gene_id "XLOC_029245"; transcript_id "TCONS_00049117"; exon_number "1"; |
| oId "CUFF.54045.1"; tss_id "TSS36949"; |           |   |   |   |                                                                         |
| chr2 Cufflinks exon156002790           | 156003063 | . | + | . | gene_id "XLOC_029245"; transcript_id "TCONS_00049117"; exon_number "2"; |
| oId "CUFF.54045.1"; tss_id "TSS36949"; |           |   |   |   |                                                                         |
| chr2 Cufflinks exon157523123           | 157523183 | . | + | . | gene_id "XLOC_029253"; transcript_id "TCONS_00049128"; exon_number "1"; |
| oId "CUFF.54079.1"; tss_id "TSS36960"; |           |   |   |   |                                                                         |
| chr2 Cufflinks exon157550523           | 157553974 | . | + | . | gene_id "XLOC_029253"; transcript_id "TCONS_00049128"; exon_number "2"; |
| oId "CUFF.54079.1"; tss_id "TSS36960"; |           |   |   |   |                                                                         |
| chr2 Cufflinks exon157523123           | 157523183 | . | + | . | gene_id "XLOC_029253"; transcript_id "TCONS_00049129"; exon_number "1"; |
| oId "CUFF.54079.2"; tss_id "TSS36960"; |           |   |   |   |                                                                         |
| chr2 Cufflinks exon157550523           | 157551066 | . | + | . | gene_id "XLOC_029253"; transcript_id "TCONS_00049129"; exon_number "2"; |
| oId "CUFF.54079.2"; tss_id "TSS36960"; |           |   |   |   |                                                                         |
| chr2 Cufflinks exon157565255           | 157567057 | . | + | . | gene_id "XLOC_029253"; transcript_id "TCONS_00049129"; exon_number "3"; |
| oId "CUFF.54079.2"; tss_id "TSS36960"; |           |   |   |   |                                                                         |
| chr2 Cufflinks exon157523139           | 157523183 | . | + | . | gene_id "XLOC_029253"; transcript_id "TCONS_00049130"; exon_number "1"; |
| oId "CUFF.54079.3"; tss_id "TSS36960"; |           |   |   |   |                                                                         |
| chr2 Cufflinks exon157536030           | 157536143 | . | + | . | gene_id "XLOC_029253"; transcript_id "TCONS_00049130"; exon_number "2"; |
| oId "CUFF.54079.3"; tss_id "TSS36960"; |           |   |   |   |                                                                         |
| chr2 Cufflinks exon157550523           | 157551064 | . | + | . | gene_id "XLOC_029253"; transcript_id "TCONS_00049130"; exon_number "3"; |
| oId "CUFF.54079.3"; tss_id "TSS36960"; |           |   |   |   |                                                                         |
| chr2 Cufflinks exon157565255           | 157566381 | . | + | . | gene_id "XLOC_029253"; transcript_id "TCONS_00049130"; exon_number "4"; |
| oId "CUFF.54079.3"; tss_id "TSS36960"; |           |   |   |   |                                                                         |
| chr2 Cufflinks exon157644394           | 157644561 | . | + | . | gene_id "XLOC_029253"; transcript_id "TCONS_00049130"; exon_number "5"; |
| oId "CUFF.54079.3"; tss_id "TSS36960"; |           |   |   |   |                                                                         |
| chr2 Cufflinks exon162101075           | 162101406 | . | + | . | gene_id "XLOC_029282"; transcript_id "TCONS_00049172"; exon_number "1"; |
| oId "CUFF.54186.2"; tss_id "TSS36994"; |           |   |   |   |                                                                         |
| chr2 Cufflinks exon162103386           | 162107977 | . | + | . | gene_id "XLOC_029282"; transcript_id "TCONS_00049172"; exon_number "2"; |
| oId "CUFF.54186.2"; tss_id "TSS36994"; |           |   |   |   |                                                                         |
| chr2 Cufflinks exon162101075           | 162101406 | . | + | . | gene_id "XLOC_029282"; transcript_id "TCONS_00049171"; exon_number "1"; |
| oId "CUFF.54186.1"; tss_id "TSS36994"; |           |   |   |   |                                                                         |
| chr2 Cufflinks exon162101935           | 162101978 | . | + | . | gene_id "XLOC_029282"; transcript_id "TCONS_00049171"; exon_number "2"; |
| oId "CUFF.54186.1"; tss_id "TSS36994"; |           |   |   |   |                                                                         |
| chr2 Cufflinks exon162103386           | 162107977 | . | + | . | gene_id "XLOC_029282"; transcript_id "TCONS_00049171"; exon_number "3"; |

oId "CUFF.54186.1"; tss\_id "TSS36994";  
chr2 Cufflinks exon163175261 163175693 . + . gene\_id "XLOC\_029292"; transcript\_id "TCONS\_00049183"; exon\_number "1";  
oId "CUFF.54212.1"; tss\_id "TSS37004";  
chr2 Cufflinks exon163175792 163175966 . + . gene\_id "XLOC\_029292"; transcript\_id "TCONS\_00049183"; exon\_number "2";  
oId "CUFF.54212.1"; tss\_id "TSS37004";  
chr2 Cufflinks exon171824039 171826569 . + . gene\_id "XLOC\_029333"; transcript\_id "TCONS\_00049253"; exon\_number "1";  
oId "CUFF.54377.1"; tss\_id "TSS37056";  
chr2 Cufflinks exon171829478 171829807 . + . gene\_id "XLOC\_029333"; transcript\_id "TCONS\_00049253"; exon\_number "2";  
oId "CUFF.54377.1"; tss\_id "TSS37056";  
chr2 Cufflinks exon172967734 172967996 . + . gene\_id "XLOC\_029351"; transcript\_id "TCONS\_00049287"; exon\_number "1";  
oId "CUFF.54445.2"; tss\_id "TSS37079";  
chr2 Cufflinks exon172968666 172968760 . + . gene\_id "XLOC\_029351"; transcript\_id "TCONS\_00049287"; exon\_number "2";  
oId "CUFF.54445.2"; tss\_id "TSS37079";  
chr2 Cufflinks exon172970611 172970928 . + . gene\_id "XLOC\_029351"; transcript\_id "TCONS\_00049287"; exon\_number "3";  
oId "CUFF.54445.2"; tss\_id "TSS37079";  
chr2 Cufflinks exon172973630 172973710 . + . gene\_id "XLOC\_029351"; transcript\_id "TCONS\_00049287"; exon\_number "4";  
oId "CUFF.54445.2"; tss\_id "TSS37079";  
chr2 Cufflinks exon172974518 172975137 . + . gene\_id "XLOC\_029351"; transcript\_id "TCONS\_00049287"; exon\_number "5";  
oId "CUFF.54445.2"; tss\_id "TSS37079";  
chr2 Cufflinks exon172967734 172967996 . + . gene\_id "XLOC\_029351"; transcript\_id "TCONS\_00049286"; exon\_number "1";  
oId "CUFF.54445.1"; tss\_id "TSS37079";  
chr2 Cufflinks exon172968666 172968760 . + . gene\_id "XLOC\_029351"; transcript\_id "TCONS\_00049286"; exon\_number "2";  
oId "CUFF.54445.1"; tss\_id "TSS37079";  
chr2 Cufflinks exon172973630 172973710 . + . gene\_id "XLOC\_029351"; transcript\_id "TCONS\_00049286"; exon\_number "3";  
oId "CUFF.54445.1"; tss\_id "TSS37079";  
chr2 Cufflinks exon172974518 172975137 . + . gene\_id "XLOC\_029351"; transcript\_id "TCONS\_00049286"; exon\_number "4";  
oId "CUFF.54445.1"; tss\_id "TSS37079";  
chr2 Cufflinks exon173104343 173104803 . + . gene\_id "XLOC\_029356"; transcript\_id "TCONS\_00049293"; exon\_number "1";  
oId "CUFF.54452.4"; tss\_id "TSS37084";  
chr2 Cufflinks exon173162931 173163071 . + . gene\_id "XLOC\_029356"; transcript\_id "TCONS\_00049293"; exon\_number "2";  
oId "CUFF.54452.4"; tss\_id "TSS37084";  
chr2 Cufflinks exon173188078 173188243 . + . gene\_id "XLOC\_029356"; transcript\_id "TCONS\_00049293"; exon\_number "3";  
oId "CUFF.54452.4"; tss\_id "TSS37084";  
chr2 Cufflinks exon173232499 173232609 . + . gene\_id "XLOC\_029356"; transcript\_id "TCONS\_00049293"; exon\_number "4";  
oId "CUFF.54452.4"; tss\_id "TSS37084";  
chr2 Cufflinks exon173234784 173234901 . + . gene\_id "XLOC\_029356"; transcript\_id "TCONS\_00049293"; exon\_number "5";  
oId "CUFF.54452.4"; tss\_id "TSS37084";  
chr2 Cufflinks exon173286071 173286899 . + . gene\_id "XLOC\_029356"; transcript\_id "TCONS\_00049293"; exon\_number "6";  
oId "CUFF.54452.4"; tss\_id "TSS37084";  
chr2 Cufflinks exon173104343 173104803 . + . gene\_id "XLOC\_029356"; transcript\_id "TCONS\_00049292"; exon\_number "1";  
oId "CUFF.54452.3"; tss\_id "TSS37084";  
chr2 Cufflinks exon173188078 173188243 . + . gene\_id "XLOC\_029356"; transcript\_id "TCONS\_00049292"; exon\_number "2";  
oId "CUFF.54452.3"; tss\_id "TSS37084";



|                                        |           |   |   |   |                                                                         |
|----------------------------------------|-----------|---|---|---|-------------------------------------------------------------------------|
| chr2 Cufflinks exon173232499           | 173232609 | . | + | . | gene_id "XLOC_029356"; transcript_id "TCONS_00049292"; exon_number "3"; |
| oId "CUFF.54452.3"; tss_id "TSS37084"; |           |   |   |   |                                                                         |
| chr2 Cufflinks exon173234804           | 173234901 | . | + | . | gene_id "XLOC_029356"; transcript_id "TCONS_00049292"; exon_number "4"; |
| oId "CUFF.54452.3"; tss_id "TSS37084"; |           |   |   |   |                                                                         |
| chr2 Cufflinks exon173286071           | 173286899 | . | + | . | gene_id "XLOC_029356"; transcript_id "TCONS_00049292"; exon_number "5"; |
| oId "CUFF.54452.3"; tss_id "TSS37084"; |           |   |   |   |                                                                         |
| chr2 Cufflinks exon174245596           | 174245656 | . | + | . | gene_id "XLOC_029382"; transcript_id "TCONS_00049337"; exon_number "1"; |
| oId "CUFF.54510.2"; tss_id "TSS37120"; |           |   |   |   |                                                                         |
| chr2 Cufflinks exon174247911           | 174257050 | . | + | . | gene_id "XLOC_029382"; transcript_id "TCONS_00049337"; exon_number "2"; |
| oId "CUFF.54510.2"; tss_id "TSS37120"; |           |   |   |   |                                                                         |
| chr2 Cufflinks exon177042894           | 177042981 | . | + | . | gene_id "XLOC_029414"; transcript_id "TCONS_00049380"; exon_number "1"; |
| oId "CUFF.54615.1"; tss_id "TSS37153"; |           |   |   |   |                                                                         |
| chr2 Cufflinks exon177043153           | 177043737 | . | + | . | gene_id "XLOC_029414"; transcript_id "TCONS_00049380"; exon_number "2"; |
| oId "CUFF.54615.1"; tss_id "TSS37153"; |           |   |   |   |                                                                         |
| chr2 Cufflinks exon179387554           | 179387587 | . | + | . | gene_id "XLOC_029442"; transcript_id "TCONS_00049423"; exon_number "1"; |
| oId "CUFF.54703.1"; tss_id "TSS37184"; |           |   |   |   |                                                                         |
| chr2 Cufflinks exon179388179           | 179388363 | . | + | . | gene_id "XLOC_029442"; transcript_id "TCONS_00049423"; exon_number "2"; |
| oId "CUFF.54703.1"; tss_id "TSS37184"; |           |   |   |   |                                                                         |
| chr2 Cufflinks exon179400459           | 179400555 | . | + | . | gene_id "XLOC_029442"; transcript_id "TCONS_00049423"; exon_number "3"; |
| oId "CUFF.54703.1"; tss_id "TSS37184"; |           |   |   |   |                                                                         |
| chr2 Cufflinks exon179402088           | 179402418 | . | + | . | gene_id "XLOC_029442"; transcript_id "TCONS_00049423"; exon_number "4"; |
| oId "CUFF.54703.1"; tss_id "TSS37184"; |           |   |   |   |                                                                         |
| chr2 Cufflinks exon179403425           | 179406426 | . | + | . | gene_id "XLOC_029442"; transcript_id "TCONS_00049423"; exon_number "5"; |
| oId "CUFF.54703.1"; tss_id "TSS37184"; |           |   |   |   |                                                                         |
| chr2 Cufflinks exon179387918           | 179388363 | . | + | . | gene_id "XLOC_029442"; transcript_id "TCONS_00049429"; exon_number "1"; |
| oId "CUFF.54703.7"; tss_id "TSS37185"; |           |   |   |   |                                                                         |
| chr2 Cufflinks exon179436027           | 179436176 | . | + | . | gene_id "XLOC_029442"; transcript_id "TCONS_00049429"; exon_number "2"; |
| oId "CUFF.54703.7"; tss_id "TSS37185"; |           |   |   |   |                                                                         |
| chr2 Cufflinks exon179462323           | 179462408 | . | + | . | gene_id "XLOC_029442"; transcript_id "TCONS_00049429"; exon_number "3"; |
| oId "CUFF.54703.7"; tss_id "TSS37185"; |           |   |   |   |                                                                         |
| chr2 Cufflinks exon179472894           | 179472993 | . | + | . | gene_id "XLOC_029442"; transcript_id "TCONS_00049429"; exon_number "4"; |
| oId "CUFF.54703.7"; tss_id "TSS37185"; |           |   |   |   |                                                                         |
| chr2 Cufflinks exon179478762           | 179479531 | . | + | . | gene_id "XLOC_029442"; transcript_id "TCONS_00049429"; exon_number "5"; |
| oId "CUFF.54703.7"; tss_id "TSS37185"; |           |   |   |   |                                                                         |
| chr2 Cufflinks exon179480050           | 179480101 | . | + | . | gene_id "XLOC_029442"; transcript_id "TCONS_00049429"; exon_number "6"; |
| oId "CUFF.54703.7"; tss_id "TSS37185"; |           |   |   |   |                                                                         |
| chr2 Cufflinks exon179484480           | 179492382 | . | + | . | gene_id "XLOC_029442"; transcript_id "TCONS_00049429"; exon_number "7"; |
| oId "CUFF.54703.7"; tss_id "TSS37185"; |           |   |   |   |                                                                         |
| chr2 Cufflinks exon181988564           | 181988707 | . | + | . | gene_id "XLOC_029452"; transcript_id "TCONS_00049445"; exon_number "1"; |
| oId "CUFF.54731.3"; tss_id "TSS37198"; |           |   |   |   |                                                                         |
| chr2 Cufflinks exon182091198           | 182091262 | . | + | . | gene_id "XLOC_029452"; transcript_id "TCONS_00049445"; exon_number "2"; |
| oId "CUFF.54731.3"; tss_id "TSS37198"; |           |   |   |   |                                                                         |
| chr2 Cufflinks exon182127556           | 182127704 | . | + | . | gene_id "XLOC_029452"; transcript_id "TCONS_00049445"; exon_number "3"; |

oId "CUFF.54731.3"; tss\_id "TSS37198";  
chr2 Cufflinks exon182227414 182227645 . + . gene\_id "XLOC\_029452"; transcript\_id "TCONS\_00049445"; exon\_number "4";  
oId "CUFF.54731.3"; tss\_id "TSS37198";  
chr2 Cufflinks exon182228025 182228064 . + . gene\_id "XLOC\_029452"; transcript\_id "TCONS\_00049445"; exon\_number "5";  
oId "CUFF.54731.3"; tss\_id "TSS37198";  
chr2 Cufflinks exon182263106 182269029 . + . gene\_id "XLOC\_029452"; transcript\_id "TCONS\_00049445"; exon\_number "6";  
oId "CUFF.54731.3"; tss\_id "TSS37198";  
chr2 Cufflinks exon181988564 181988707 . + . gene\_id "XLOC\_029452"; transcript\_id "TCONS\_00049446"; exon\_number "1";  
oId "CUFF.54731.5"; tss\_id "TSS37198";  
chr2 Cufflinks exon182091198 182091262 . + . gene\_id "XLOC\_029452"; transcript\_id "TCONS\_00049446"; exon\_number "2";  
oId "CUFF.54731.5"; tss\_id "TSS37198";  
chr2 Cufflinks exon182127556 182127704 . + . gene\_id "XLOC\_029452"; transcript\_id "TCONS\_00049446"; exon\_number "3";  
oId "CUFF.54731.5"; tss\_id "TSS37198";  
chr2 Cufflinks exon182227414 182227645 . + . gene\_id "XLOC\_029452"; transcript\_id "TCONS\_00049446"; exon\_number "4";  
oId "CUFF.54731.5"; tss\_id "TSS37198";  
chr2 Cufflinks exon182263106 182269029 . + . gene\_id "XLOC\_029452"; transcript\_id "TCONS\_00049446"; exon\_number "5";  
oId "CUFF.54731.5"; tss\_id "TSS37198";  
chr2 Cufflinks exon181988564 181988707 . + . gene\_id "XLOC\_029452"; transcript\_id "TCONS\_00049444"; exon\_number "1";  
oId "CUFF.54731.2"; tss\_id "TSS37198";  
chr2 Cufflinks exon182091198 182091262 . + . gene\_id "XLOC\_029452"; transcript\_id "TCONS\_00049444"; exon\_number "2";  
oId "CUFF.54731.2"; tss\_id "TSS37198";  
chr2 Cufflinks exon182102978 182103177 . + . gene\_id "XLOC\_029452"; transcript\_id "TCONS\_00049444"; exon\_number "3";  
oId "CUFF.54731.2"; tss\_id "TSS37198";  
chr2 Cufflinks exon182187388 182187457 . + . gene\_id "XLOC\_029452"; transcript\_id "TCONS\_00049444"; exon\_number "4";  
oId "CUFF.54731.2"; tss\_id "TSS37198";  
chr2 Cufflinks exon182218935 182219070 . + . gene\_id "XLOC\_029452"; transcript\_id "TCONS\_00049444"; exon\_number "5";  
oId "CUFF.54731.2"; tss\_id "TSS37198";  
chr2 Cufflinks exon182227414 182227645 . + . gene\_id "XLOC\_029452"; transcript\_id "TCONS\_00049444"; exon\_number "6";  
oId "CUFF.54731.2"; tss\_id "TSS37198";  
chr2 Cufflinks exon182263106 182269029 . + . gene\_id "XLOC\_029452"; transcript\_id "TCONS\_00049444"; exon\_number "7";  
oId "CUFF.54731.2"; tss\_id "TSS37198";  
chr2 Cufflinks exon181988564 181988707 . + . gene\_id "XLOC\_029452"; transcript\_id "TCONS\_00049443"; exon\_number "1";  
oId "CUFF.54731.1"; tss\_id "TSS37198";  
chr2 Cufflinks exon182091198 182091262 . + . gene\_id "XLOC\_029452"; transcript\_id "TCONS\_00049443"; exon\_number "2";  
oId "CUFF.54731.1"; tss\_id "TSS37198";  
chr2 Cufflinks exon182187388 182187457 . + . gene\_id "XLOC\_029452"; transcript\_id "TCONS\_00049443"; exon\_number "3";  
oId "CUFF.54731.1"; tss\_id "TSS37198";  
chr2 Cufflinks exon182227414 182227645 . + . gene\_id "XLOC\_029452"; transcript\_id "TCONS\_00049443"; exon\_number "4";  
oId "CUFF.54731.1"; tss\_id "TSS37198";  
chr2 Cufflinks exon182263106 182269029 . + . gene\_id "XLOC\_029452"; transcript\_id "TCONS\_00049443"; exon\_number "5";  
oId "CUFF.54731.1"; tss\_id "TSS37198";  
chr2 Cufflinks exon181988564 181988707 . + . gene\_id "XLOC\_029452"; transcript\_id "TCONS\_00049447"; exon\_number "1";  
oId "CUFF.54731.4"; tss\_id "TSS37198";

|                                        |           |   |   |   |                                                                         |
|----------------------------------------|-----------|---|---|---|-------------------------------------------------------------------------|
| chr2 Cufflinks exon182091198           | 182091262 | . | + | . | gene_id "XLOC_029452"; transcript_id "TCONS_00049447"; exon_number "2"; |
| oId "CUFF.54731.4"; tss_id "TSS37198"; |           |   |   |   |                                                                         |
| chr2 Cufflinks exon182102978           | 182103177 | . | + | . | gene_id "XLOC_029452"; transcript_id "TCONS_00049447"; exon_number "3"; |
| oId "CUFF.54731.4"; tss_id "TSS37198"; |           |   |   |   |                                                                         |
| chr2 Cufflinks exon182187388           | 182187457 | . | + | . | gene_id "XLOC_029452"; transcript_id "TCONS_00049447"; exon_number "4"; |
| oId "CUFF.54731.4"; tss_id "TSS37198"; |           |   |   |   |                                                                         |
| chr2 Cufflinks exon182227414           | 182227645 | . | + | . | gene_id "XLOC_029452"; transcript_id "TCONS_00049447"; exon_number "5"; |
| oId "CUFF.54731.4"; tss_id "TSS37198"; |           |   |   |   |                                                                         |
| chr2 Cufflinks exon182228025           | 182228064 | . | + | . | gene_id "XLOC_029452"; transcript_id "TCONS_00049447"; exon_number "6"; |
| oId "CUFF.54731.4"; tss_id "TSS37198"; |           |   |   |   |                                                                         |
| chr2 Cufflinks exon182269157           | 182273943 | . | + | . | gene_id "XLOC_029452"; transcript_id "TCONS_00049447"; exon_number "7"; |
| oId "CUFF.54731.4"; tss_id "TSS37198"; |           |   |   |   |                                                                         |
| chr2 Cufflinks exon182127707           | 182127780 | . | + | . | gene_id "XLOC_029452"; transcript_id "TCONS_00049448"; exon_number "1"; |
| oId "CUFF.54731.6"; tss_id "TSS37199"; |           |   |   |   |                                                                         |
| chr2 Cufflinks exon182187388           | 182187457 | . | + | . | gene_id "XLOC_029452"; transcript_id "TCONS_00049448"; exon_number "2"; |
| oId "CUFF.54731.6"; tss_id "TSS37199"; |           |   |   |   |                                                                         |
| chr2 Cufflinks exon182218935           | 182219070 | . | + | . | gene_id "XLOC_029452"; transcript_id "TCONS_00049448"; exon_number "3"; |
| oId "CUFF.54731.6"; tss_id "TSS37199"; |           |   |   |   |                                                                         |
| chr2 Cufflinks exon182227414           | 182227645 | . | + | . | gene_id "XLOC_029452"; transcript_id "TCONS_00049448"; exon_number "4"; |
| oId "CUFF.54731.6"; tss_id "TSS37199"; |           |   |   |   |                                                                         |
| chr2 Cufflinks exon182263106           | 182263285 | . | + | . | gene_id "XLOC_029452"; transcript_id "TCONS_00049448"; exon_number "5"; |
| oId "CUFF.54731.6"; tss_id "TSS37199"; |           |   |   |   |                                                                         |
| chr2 Cufflinks exon182268069           | 182269029 | . | + | . | gene_id "XLOC_029452"; transcript_id "TCONS_00049448"; exon_number "6"; |
| oId "CUFF.54731.6"; tss_id "TSS37199"; |           |   |   |   |                                                                         |
| chr2 Cufflinks exon187375794           | 187386577 | . | + | . | gene_id "XLOC_029515"; transcript_id "TCONS_00049523"; exon_number "1"; |
| oId "CUFF.55104.1"; tss_id "TSS37264"; |           |   |   |   |                                                                         |
| chr2 Cufflinks exon187388169           | 187388217 | . | + | . | gene_id "XLOC_029515"; transcript_id "TCONS_00049523"; exon_number "2"; |
| oId "CUFF.55104.1"; tss_id "TSS37264"; |           |   |   |   |                                                                         |
| chr2 Cufflinks exon187393955           | 187394153 | . | + | . | gene_id "XLOC_029515"; transcript_id "TCONS_00049523"; exon_number "3"; |
| oId "CUFF.55104.1"; tss_id "TSS37264"; |           |   |   |   |                                                                         |
| chr2 Cufflinks exon190787898           | 190788295 | . | + | . | gene_id "XLOC_029543"; transcript_id "TCONS_00049559"; exon_number "1"; |
| oId "CUFF.55182.1"; tss_id "TSS37297"; |           |   |   |   |                                                                         |
| chr2 Cufflinks exon190788323           | 190789492 | . | + | . | gene_id "XLOC_029543"; transcript_id "TCONS_00049559"; exon_number "2"; |
| oId "CUFF.55182.1"; tss_id "TSS37297"; |           |   |   |   |                                                                         |
| chr2 Cufflinks exon190808403           | 190808416 | . | + | . | gene_id "XLOC_029543"; transcript_id "TCONS_00049559"; exon_number "3"; |
| oId "CUFF.55182.1"; tss_id "TSS37297"; |           |   |   |   |                                                                         |
| chr2 Cufflinks exon192554907           | 192554927 | . | + | . | gene_id "XLOC_029573"; transcript_id "TCONS_00049611"; exon_number "1"; |
| oId "CUFF.55322.9"; tss_id "TSS37334"; |           |   |   |   |                                                                         |
| chr2 Cufflinks exon192557929           | 192558142 | . | + | . | gene_id "XLOC_029573"; transcript_id "TCONS_00049611"; exon_number "2"; |
| oId "CUFF.55322.9"; tss_id "TSS37334"; |           |   |   |   |                                                                         |
| chr2 Cufflinks exon192573538           | 192575195 | . | + | . | gene_id "XLOC_029573"; transcript_id "TCONS_00049611"; exon_number "3"; |
| oId "CUFF.55322.9"; tss_id "TSS37334"; |           |   |   |   |                                                                         |
| chr2 Cufflinks exon198573796           | 198576543 | . | + | . | gene_id "XLOC_029609"; transcript_id "TCONS_00049658"; exon_number "1"; |

|                                                                                  |   |   |   |                                                                         |
|----------------------------------------------------------------------------------|---|---|---|-------------------------------------------------------------------------|
| oId "CUFF.55510.2"; tss_id "TSS37374";<br>chr2 Cufflinks exon198576999 198577068 | . | + | . | gene_id "XLOC_029609"; transcript_id "TCONS_00049658"; exon_number "2"; |
| oId "CUFF.55510.2"; tss_id "TSS37374";<br>chr2 Cufflinks exon198583399 198585495 | . | + | . | gene_id "XLOC_029609"; transcript_id "TCONS_00049658"; exon_number "3"; |
| oId "CUFF.55510.2"; tss_id "TSS37374";<br>chr2 Cufflinks exon206949741 206950527 | . | + | . | gene_id "XLOC_029696"; transcript_id "TCONS_00049807"; exon_number "1"; |
| oId "CUFF.55816.1"; tss_id "TSS37486";<br>chr2 Cufflinks exon206950681 206950782 | . | + | . | gene_id "XLOC_029696"; transcript_id "TCONS_00049807"; exon_number "2"; |
| oId "CUFF.55816.1"; tss_id "TSS37486";<br>chr2 Cufflinks exon206950870 206952306 | . | + | . | gene_id "XLOC_029696"; transcript_id "TCONS_00049807"; exon_number "3"; |
| oId "CUFF.55816.1"; tss_id "TSS37486";<br>chr2 Cufflinks exon209119957 209120155 | . | + | . | gene_id "XLOC_029728"; transcript_id "TCONS_00049860"; exon_number "1"; |
| oId "CUFF.55914.1"; tss_id "TSS37524";<br>chr2 Cufflinks exon209120627 209120918 | . | + | . | gene_id "XLOC_029728"; transcript_id "TCONS_00049860"; exon_number "2"; |
| oId "CUFF.55914.1"; tss_id "TSS37524";<br>chr2 Cufflinks exon217467541 217467691 | . | + | . | gene_id "XLOC_029778"; transcript_id "TCONS_00049935"; exon_number "1"; |
| oId "CUFF.56229.1"; tss_id "TSS37582";<br>chr2 Cufflinks exon217469587 217469688 | . | + | . | gene_id "XLOC_029778"; transcript_id "TCONS_00049935"; exon_number "2"; |
| oId "CUFF.56229.1"; tss_id "TSS37582";<br>chr2 Cufflinks exon217475467 217475923 | . | + | . | gene_id "XLOC_029778"; transcript_id "TCONS_00049935"; exon_number "3"; |
| oId "CUFF.56229.1"; tss_id "TSS37582";<br>chr2 Cufflinks exon218127835 218128300 | . | + | . | gene_id "XLOC_029785"; transcript_id "TCONS_00049942"; exon_number "1"; |
| oId "CUFF.56244.1"; tss_id "TSS37589";<br>chr2 Cufflinks exon218128501 218128566 | . | + | . | gene_id "XLOC_029785"; transcript_id "TCONS_00049942"; exon_number "2"; |
| oId "CUFF.56244.1"; tss_id "TSS37589";<br>chr2 Cufflinks exon218142321 218142995 | . | + | . | gene_id "XLOC_029785"; transcript_id "TCONS_00049942"; exon_number "3"; |
| oId "CUFF.56244.1"; tss_id "TSS37589";<br>chr2 Cufflinks exon218147438 218147532 | . | + | . | gene_id "XLOC_029785"; transcript_id "TCONS_00049942"; exon_number "4"; |
| oId "CUFF.56244.1"; tss_id "TSS37589";<br>chr2 Cufflinks exon218161355 218161493 | . | + | . | gene_id "XLOC_029785"; transcript_id "TCONS_00049942"; exon_number "5"; |
| oId "CUFF.56244.1"; tss_id "TSS37589";<br>chr2 Cufflinks exon218167409 218167508 | . | + | . | gene_id "XLOC_029785"; transcript_id "TCONS_00049942"; exon_number "6"; |
| oId "CUFF.56244.1"; tss_id "TSS37589";<br>chr2 Cufflinks exon218167733 218172932 | . | + | . | gene_id "XLOC_029785"; transcript_id "TCONS_00049942"; exon_number "7"; |
| oId "CUFF.56244.1"; tss_id "TSS37589";<br>chr2 Cufflinks exon218147456 218147532 | . | + | . | gene_id "XLOC_029785"; transcript_id "TCONS_00049944"; exon_number "1"; |
| oId "CUFF.56244.2"; tss_id "TSS37590";<br>chr2 Cufflinks exon218160627 218160710 | . | + | . | gene_id "XLOC_029785"; transcript_id "TCONS_00049944"; exon_number "2"; |
| oId "CUFF.56244.2"; tss_id "TSS37590";<br>chr2 Cufflinks exon218161355 218161493 | . | + | . | gene_id "XLOC_029785"; transcript_id "TCONS_00049944"; exon_number "3"; |
| oId "CUFF.56244.2"; tss_id "TSS37590";<br>chr2 Cufflinks exon218167409 218167508 | . | + | . | gene_id "XLOC_029785"; transcript_id "TCONS_00049944"; exon_number "4"; |
| oId "CUFF.56244.2"; tss_id "TSS37590";                                           |   |   |   |                                                                         |

|                                        |           |   |   |   |                                                                         |
|----------------------------------------|-----------|---|---|---|-------------------------------------------------------------------------|
| chr2 Cufflinks exon218200681           | 218201304 | . | + | . | gene_id "XLOC_029785"; transcript_id "TCONS_00049944"; exon_number "5"; |
| oId "CUFF.56244.2"; tss_id "TSS37590"; |           |   |   |   |                                                                         |
| chr2 Cufflinks exon218208893           | 218208927 | . | + | . | gene_id "XLOC_029785"; transcript_id "TCONS_00049944"; exon_number "6"; |
| oId "CUFF.56244.2"; tss_id "TSS37590"; |           |   |   |   |                                                                         |
| chr2 Cufflinks exon232258002           | 232258621 | . | + | . | gene_id "XLOC_029900"; transcript_id "TCONS_00050153"; exon_number "1"; |
| oId "CUFF.56590.1"; tss_id "TSS37726"; |           |   |   |   |                                                                         |
| chr2 Cufflinks exon232259492           | 232259702 | . | + | . | gene_id "XLOC_029900"; transcript_id "TCONS_00050153"; exon_number "2"; |
| oId "CUFF.56590.1"; tss_id "TSS37726"; |           |   |   |   |                                                                         |
| chr2 Cufflinks exon232549750           | 232552232 | . | + | . | gene_id "XLOC_029903"; transcript_id "TCONS_00050159"; exon_number "1"; |
| oId "CUFF.56635.1"; tss_id "TSS37730"; |           |   |   |   |                                                                         |
| chr2 Cufflinks exon232552373           | 232555149 | . | + | . | gene_id "XLOC_029903"; transcript_id "TCONS_00050159"; exon_number "2"; |
| oId "CUFF.56635.1"; tss_id "TSS37730"; |           |   |   |   |                                                                         |
| chr2 Cufflinks exon237445769           | 237445990 | . | + | . | gene_id "XLOC_029948"; transcript_id "TCONS_00050242"; exon_number "1"; |
| oId "CUFF.56762.1"; tss_id "TSS37788"; |           |   |   |   |                                                                         |
| chr2 Cufflinks exon237446745           | 237447724 | . | + | . | gene_id "XLOC_029948"; transcript_id "TCONS_00050242"; exon_number "2"; |
| oId "CUFF.56762.1"; tss_id "TSS37788"; |           |   |   |   |                                                                         |
| chr2 Cufflinks exon240323417           | 240323663 | . | + | . | gene_id "XLOC_029988"; transcript_id "TCONS_00050301"; exon_number "1"; |
| oId "CUFF.56882.1"; tss_id "TSS37832"; |           |   |   |   |                                                                         |
| chr2 Cufflinks exon240323769           | 240326321 | . | + | . | gene_id "XLOC_029988"; transcript_id "TCONS_00050301"; exon_number "2"; |
| oId "CUFF.56882.1"; tss_id "TSS37832"; |           |   |   |   |                                                                         |
| chr2 Cufflinks exon240479186           | 240480944 | . | + | . | gene_id "XLOC_029996"; transcript_id "TCONS_00050313"; exon_number "1"; |
| oId "CUFF.56901.1"; tss_id "TSS37844"; |           |   |   |   |                                                                         |
| chr2 Cufflinks exon240481056           | 240482436 | . | + | . | gene_id "XLOC_029996"; transcript_id "TCONS_00050313"; exon_number "2"; |
| oId "CUFF.56901.1"; tss_id "TSS37844"; |           |   |   |   |                                                                         |
| chr2 Cufflinks exon240479306           | 240480013 | . | + | . | gene_id "XLOC_029996"; transcript_id "TCONS_00050314"; exon_number "1"; |
| oId "CUFF.56901.2"; tss_id "TSS37845"; |           |   |   |   |                                                                         |
| chr2 Cufflinks exon240480445           | 240482436 | . | + | . | gene_id "XLOC_029996"; transcript_id "TCONS_00050314"; exon_number "2"; |
| oId "CUFF.56901.2"; tss_id "TSS37845"; |           |   |   |   |                                                                         |
| chr2 Cufflinks exon240545863           | 240546182 | . | + | . | gene_id "XLOC_030008"; transcript_id "TCONS_00050328"; exon_number "1"; |
| oId "CUFF.56913.1"; tss_id "TSS37857"; |           |   |   |   |                                                                         |
| chr2 Cufflinks exon240552272           | 240555494 | . | + | . | gene_id "XLOC_030008"; transcript_id "TCONS_00050328"; exon_number "2"; |
| oId "CUFF.56913.1"; tss_id "TSS37857"; |           |   |   |   |                                                                         |
| chr2 Cufflinks exon240560177           | 240561505 | . | + | . | gene_id "XLOC_030008"; transcript_id "TCONS_00050328"; exon_number "3"; |
| oId "CUFF.56913.1"; tss_id "TSS37857"; |           |   |   |   |                                                                         |
| chr2 Cufflinks exon240546755           | 240547477 | . | + | . | gene_id "XLOC_030008"; transcript_id "TCONS_00050329"; exon_number "1"; |
| oId "CUFF.56913.2"; tss_id "TSS37858"; |           |   |   |   |                                                                         |
| chr2 Cufflinks exon240552272           | 240556030 | . | + | . | gene_id "XLOC_030008"; transcript_id "TCONS_00050329"; exon_number "2"; |
| oId "CUFF.56913.2"; tss_id "TSS37858"; |           |   |   |   |                                                                         |
| chr2 Cufflinks exon240546933           | 240547477 | . | + | . | gene_id "XLOC_030008"; transcript_id "TCONS_00050330"; exon_number "1"; |
| oId "CUFF.56913.3"; tss_id "TSS37859"; |           |   |   |   |                                                                         |
| chr2 Cufflinks exon240552272           | 240555494 | . | + | . | gene_id "XLOC_030008"; transcript_id "TCONS_00050330"; exon_number "2"; |
| oId "CUFF.56913.3"; tss_id "TSS37859"; |           |   |   |   |                                                                         |
| chr2 Cufflinks exon240557419           | 240558345 | . | + | . | gene_id "XLOC_030008"; transcript_id "TCONS_00050330"; exon_number "3"; |

oId "CUFF.56913.3"; tss\_id "TSS37859";  
chr2 Cufflinks exon241904381 241904607 . + . gene\_id "XLOC\_030028"; transcript\_id "TCONS\_00050362"; exon\_number "1";  
oId "CUFF.56989.1"; tss\_id "TSS37883";  
chr2 Cufflinks exon241904798 241904935 . + . gene\_id "XLOC\_030028"; transcript\_id "TCONS\_00050362"; exon\_number "2";  
oId "CUFF.56989.1"; tss\_id "TSS37883";  
chr2 Cufflinks exon241905053 241905410 . + . gene\_id "XLOC\_030028"; transcript\_id "TCONS\_00050362"; exon\_number "3";  
oId "CUFF.56989.1"; tss\_id "TSS37883";  
chr2 Cufflinks exon241905642 241905826 . + . gene\_id "XLOC\_030028"; transcript\_id "TCONS\_00050362"; exon\_number "4";  
oId "CUFF.56989.1"; tss\_id "TSS37883";  
chr2 Cufflinks exon241906762 241906883 . + . gene\_id "XLOC\_030028"; transcript\_id "TCONS\_00050362"; exon\_number "5";  
oId "CUFF.56989.1"; tss\_id "TSS37883";  
chr2 Cufflinks exon241907546 241907679 . + . gene\_id "XLOC\_030028"; transcript\_id "TCONS\_00050362"; exon\_number "6";  
oId "CUFF.56989.1"; tss\_id "TSS37883";  
chr2 Cufflinks exon241912166 241913285 . + . gene\_id "XLOC\_030028"; transcript\_id "TCONS\_00050362"; exon\_number "7";  
oId "CUFF.56989.1"; tss\_id "TSS37883";  
chr2 Cufflinks exon241904393 241904797 . + . gene\_id "XLOC\_030028"; transcript\_id "TCONS\_00050363"; exon\_number "1";  
oId "CUFF.56989.2"; tss\_id "TSS37883";  
chr2 Cufflinks exon241905050 241905410 . + . gene\_id "XLOC\_030028"; transcript\_id "TCONS\_00050363"; exon\_number "2";  
oId "CUFF.56989.2"; tss\_id "TSS37883";  
chr2 Cufflinks exon241905642 241905826 . + . gene\_id "XLOC\_030028"; transcript\_id "TCONS\_00050363"; exon\_number "3";  
oId "CUFF.56989.2"; tss\_id "TSS37883";  
chr2 Cufflinks exon241906762 241906882 . + . gene\_id "XLOC\_030028"; transcript\_id "TCONS\_00050363"; exon\_number "4";  
oId "CUFF.56989.2"; tss\_id "TSS37883";  
chr2 Cufflinks exon241907546 241907679 . + . gene\_id "XLOC\_030028"; transcript\_id "TCONS\_00050363"; exon\_number "5";  
oId "CUFF.56989.2"; tss\_id "TSS37883";  
chr2 Cufflinks exon241922297 241922446 . + . gene\_id "XLOC\_030028"; transcript\_id "TCONS\_00050363"; exon\_number "6";  
oId "CUFF.56989.2"; tss\_id "TSS37883";  
chr2 Cufflinks exon241928121 241928287 . + . gene\_id "XLOC\_030028"; transcript\_id "TCONS\_00050363"; exon\_number "7";  
oId "CUFF.56989.2"; tss\_id "TSS37883";  
chr2 Cufflinks exon241929071 241930320 . + . gene\_id "XLOC\_030028"; transcript\_id "TCONS\_00050363"; exon\_number "8";  
oId "CUFF.56989.2"; tss\_id "TSS37883";  
chr2 Cufflinks exon241904779 241904935 . + . gene\_id "XLOC\_030028"; transcript\_id "TCONS\_00050364"; exon\_number "1";  
oId "CUFF.56989.3"; tss\_id "TSS37884";  
chr2 Cufflinks exon241905053 241905410 . + . gene\_id "XLOC\_030028"; transcript\_id "TCONS\_00050364"; exon\_number "2";  
oId "CUFF.56989.3"; tss\_id "TSS37884";  
chr2 Cufflinks exon241905642 241905826 . + . gene\_id "XLOC\_030028"; transcript\_id "TCONS\_00050364"; exon\_number "3";  
oId "CUFF.56989.3"; tss\_id "TSS37884";  
chr2 Cufflinks exon241906762 241906882 . + . gene\_id "XLOC\_030028"; transcript\_id "TCONS\_00050364"; exon\_number "4";  
oId "CUFF.56989.3"; tss\_id "TSS37884";  
chr2 Cufflinks exon241907546 241907679 . + . gene\_id "XLOC\_030028"; transcript\_id "TCONS\_00050364"; exon\_number "5";  
oId "CUFF.56989.3"; tss\_id "TSS37884";  
chr2 Cufflinks exon241909169 241911415 . + . gene\_id "XLOC\_030028"; transcript\_id "TCONS\_00050364"; exon\_number "6";  
oId "CUFF.56989.3"; tss\_id "TSS37884";

|                                        |           |   |   |   |                                                                         |
|----------------------------------------|-----------|---|---|---|-------------------------------------------------------------------------|
| chr2 Cufflinks exon242484774           | 242484989 | . | + | . | gene_id "XLOC_030044"; transcript_id "TCONS_00050391"; exon_number "1"; |
| oId "CUFF.57046.2"; tss_id "TSS37903"; |           |   |   |   |                                                                         |
| chr2 Cufflinks exon242486276           | 242486498 | . | + | . | gene_id "XLOC_030044"; transcript_id "TCONS_00050391"; exon_number "2"; |
| oId "CUFF.57046.2"; tss_id "TSS37903"; |           |   |   |   |                                                                         |
| chr2 Cufflinks exon242486673           | 242488816 | . | + | . | gene_id "XLOC_030044"; transcript_id "TCONS_00050391"; exon_number "3"; |
| oId "CUFF.57046.2"; tss_id "TSS37903"; |           |   |   |   |                                                                         |
| chr2 Cufflinks exon242484774           | 242484989 | . | + | . | gene_id "XLOC_030044"; transcript_id "TCONS_00050390"; exon_number "1"; |
| oId "CUFF.57046.1"; tss_id "TSS37903"; |           |   |   |   |                                                                         |
| chr2 Cufflinks exon242486280           | 242486498 | . | + | . | gene_id "XLOC_030044"; transcript_id "TCONS_00050390"; exon_number "2"; |
| oId "CUFF.57046.1"; tss_id "TSS37903"; |           |   |   |   |                                                                         |
| chr2 Cufflinks exon242486673           | 242488816 | . | + | . | gene_id "XLOC_030044"; transcript_id "TCONS_00050390"; exon_number "3"; |
| oId "CUFF.57046.1"; tss_id "TSS37903"; |           |   |   |   |                                                                         |
| chr2 Cufflinks exon242625992           | 242627477 | . | + | . | gene_id "XLOC_030047"; transcript_id "TCONS_00050396"; exon_number "1"; |
| oId "CUFF.57061.1"; tss_id "TSS37907"; |           |   |   |   |                                                                         |
| chr2 Cufflinks exon242629253           | 242630068 | . | + | . | gene_id "XLOC_030047"; transcript_id "TCONS_00050396"; exon_number "2"; |
| oId "CUFF.57061.1"; tss_id "TSS37907"; |           |   |   |   |                                                                         |
| chr2 Cufflinks exon242633530           | 242633957 | . | + | . | gene_id "XLOC_030047"; transcript_id "TCONS_00050396"; exon_number "3"; |
| oId "CUFF.57061.1"; tss_id "TSS37907"; |           |   |   |   |                                                                         |
| chr2 Cufflinks exon242709189           | 242710807 | . | + | . | gene_id "XLOC_030058"; transcript_id "TCONS_00050412"; exon_number "1"; |
| oId "CUFF.57083.1"; tss_id "TSS37919"; |           |   |   |   |                                                                         |
| chr2 Cufflinks exon242711749           | 242712015 | . | + | . | gene_id "XLOC_030058"; transcript_id "TCONS_00050412"; exon_number "2"; |
| oId "CUFF.57083.1"; tss_id "TSS37919"; |           |   |   |   |                                                                         |
| chr2 Cufflinks exon242823514           | 242823629 | . | + | . | gene_id "XLOC_030062"; transcript_id "TCONS_00050430"; exon_number "1"; |
| oId "CUFF.57104.5"; tss_id "TSS37932"; |           |   |   |   |                                                                         |
| chr2 Cufflinks exon242824711           | 242824786 | . | + | . | gene_id "XLOC_030062"; transcript_id "TCONS_00050430"; exon_number "2"; |
| oId "CUFF.57104.5"; tss_id "TSS37932"; |           |   |   |   |                                                                         |
| chr2 Cufflinks exon242876225           | 242876361 | . | + | . | gene_id "XLOC_030062"; transcript_id "TCONS_00050430"; exon_number "3"; |
| oId "CUFF.57104.5"; tss_id "TSS37932"; |           |   |   |   |                                                                         |
| chr2 Cufflinks exon242908078           | 242909868 | . | + | . | gene_id "XLOC_030062"; transcript_id "TCONS_00050430"; exon_number "4"; |
| oId "CUFF.57104.5"; tss_id "TSS37932"; |           |   |   |   |                                                                         |
| chr2 Cufflinks exon242909949           | 242911070 | . | + | . | gene_id "XLOC_030062"; transcript_id "TCONS_00050430"; exon_number "5"; |
| oId "CUFF.57104.5"; tss_id "TSS37932"; |           |   |   |   |                                                                         |
| chr2 Cufflinks exon242823514           | 242823629 | . | + | . | gene_id "XLOC_030062"; transcript_id "TCONS_00050429"; exon_number "1"; |
| oId "CUFF.57104.3"; tss_id "TSS37932"; |           |   |   |   |                                                                         |
| chr2 Cufflinks exon242824711           | 242824789 | . | + | . | gene_id "XLOC_030062"; transcript_id "TCONS_00050429"; exon_number "2"; |
| oId "CUFF.57104.3"; tss_id "TSS37932"; |           |   |   |   |                                                                         |
| chr2 Cufflinks exon242908081           | 242908198 | . | + | . | gene_id "XLOC_030062"; transcript_id "TCONS_00050429"; exon_number "3"; |
| oId "CUFF.57104.3"; tss_id "TSS37932"; |           |   |   |   |                                                                         |
| chr2 Cufflinks exon242909290           | 242909868 | . | + | . | gene_id "XLOC_030062"; transcript_id "TCONS_00050429"; exon_number "4"; |
| oId "CUFF.57104.3"; tss_id "TSS37932"; |           |   |   |   |                                                                         |
| chr2 Cufflinks exon242909949           | 242911070 | . | + | . | gene_id "XLOC_030062"; transcript_id "TCONS_00050429"; exon_number "5"; |
| oId "CUFF.57104.3"; tss_id "TSS37932"; |           |   |   |   |                                                                         |
| chr2 Cufflinks exon242823514           | 242823629 | . | + | . | gene_id "XLOC_030062"; transcript_id "TCONS_00050428"; exon_number "1"; |

oId "CUFF.57104.1"; tss\_id "TSS37932";  
chr2 Cufflinks exon242824711 242824786 . + . gene\_id "XLOC\_030062"; transcript\_id "TCONS\_00050428"; exon\_number "2";  
oId "CUFF.57104.1"; tss\_id "TSS37932";  
chr2 Cufflinks exon242908078 242911070 . + . gene\_id "XLOC\_030062"; transcript\_id "TCONS\_00050428"; exon\_number "3";  
oId "CUFF.57104.1"; tss\_id "TSS37932";  
chr2 Cufflinks exon242823514 242823629 . + . gene\_id "XLOC\_030062"; transcript\_id "TCONS\_00050431"; exon\_number "1";  
oId "CUFF.57104.2"; tss\_id "TSS37932";  
chr2 Cufflinks exon242824165 242824280 . + . gene\_id "XLOC\_030062"; transcript\_id "TCONS\_00050431"; exon\_number "2";  
oId "CUFF.57104.2"; tss\_id "TSS37932";  
chr2 Cufflinks exon242824711 242824786 . + . gene\_id "XLOC\_030062"; transcript\_id "TCONS\_00050431"; exon\_number "3";  
oId "CUFF.57104.2"; tss\_id "TSS37932";  
chr2 Cufflinks exon242908078 242908198 . + . gene\_id "XLOC\_030062"; transcript\_id "TCONS\_00050431"; exon\_number "4";  
oId "CUFF.57104.2"; tss\_id "TSS37932";  
chr2 Cufflinks exon242929849 242942173 . + . gene\_id "XLOC\_030062"; transcript\_id "TCONS\_00050431"; exon\_number "5";  
oId "CUFF.57104.2"; tss\_id "TSS37932";  
chr2 Cufflinks exon242823514 242823629 . + . gene\_id "XLOC\_030062"; transcript\_id "TCONS\_00050432"; exon\_number "1";  
oId "CUFF.57104.4"; tss\_id "TSS37932";  
chr2 Cufflinks exon242824711 242824786 . + . gene\_id "XLOC\_030062"; transcript\_id "TCONS\_00050432"; exon\_number "2";  
oId "CUFF.57104.4"; tss\_id "TSS37932";  
chr2 Cufflinks exon242908078 242908198 . + . gene\_id "XLOC\_030062"; transcript\_id "TCONS\_00050432"; exon\_number "3";  
oId "CUFF.57104.4"; tss\_id "TSS37932";  
chr2 Cufflinks exon243020611 243020873 . + . gene\_id "XLOC\_030062"; transcript\_id "TCONS\_00050432"; exon\_number "4";  
oId "CUFF.57104.4"; tss\_id "TSS37932";  
chr2 Cufflinks exon242824109 242824280 . + . gene\_id "XLOC\_030062"; transcript\_id "TCONS\_00050433"; exon\_number "1";  
oId "CUFF.57104.6"; tss\_id "TSS37933";  
chr2 Cufflinks exon242824711 242824790 . + . gene\_id "XLOC\_030062"; transcript\_id "TCONS\_00050433"; exon\_number "2";  
oId "CUFF.57104.6"; tss\_id "TSS37933";  
chr2 Cufflinks exon242908082 242911070 . + . gene\_id "XLOC\_030062"; transcript\_id "TCONS\_00050433"; exon\_number "3";  
oId "CUFF.57104.6"; tss\_id "TSS37933";  
chr2 Cufflinks exon242824111 242824280 . + . gene\_id "XLOC\_030062"; transcript\_id "TCONS\_00050434"; exon\_number "1";  
oId "CUFF.57104.8"; tss\_id "TSS37933";  
chr2 Cufflinks exon242824711 242824786 . + . gene\_id "XLOC\_030062"; transcript\_id "TCONS\_00050434"; exon\_number "2";  
oId "CUFF.57104.8"; tss\_id "TSS37933";  
chr2 Cufflinks exon242829895 242830000 . + . gene\_id "XLOC\_030062"; transcript\_id "TCONS\_00050434"; exon\_number "3";  
oId "CUFF.57104.8"; tss\_id "TSS37933";  
chr2 Cufflinks exon242831882 242836129 . + . gene\_id "XLOC\_030062"; transcript\_id "TCONS\_00050434"; exon\_number "4";  
oId "CUFF.57104.8"; tss\_id "TSS37933";  
chr2 Cufflinks exon242824111 242824280 . + . gene\_id "XLOC\_030062"; transcript\_id "TCONS\_00050435"; exon\_number "1";  
oId "CUFF.57104.7"; tss\_id "TSS37933";  
chr2 Cufflinks exon242824711 242824786 . + . gene\_id "XLOC\_030062"; transcript\_id "TCONS\_00050435"; exon\_number "2";  
oId "CUFF.57104.7"; tss\_id "TSS37933";  
chr2 Cufflinks exon242908078 242911070 . + . gene\_id "XLOC\_030062"; transcript\_id "TCONS\_00050435"; exon\_number "3";  
oId "CUFF.57104.7"; tss\_id "TSS37933";



chr2 Cufflinks exon242930991 242931705 . + . gene\_id "XLOC\_030062"; transcript\_id "TCONS\_00050459"; exon\_number "1";  
oId "CUFF.57104.21"; tss\_id "TSS37936";  
chr2 Cufflinks exon242932574 242932596 . + . gene\_id "XLOC\_030062"; transcript\_id "TCONS\_00050459"; exon\_number "2";  
oId "CUFF.57104.21"; tss\_id "TSS37936";  
chr2 Cufflinks exon242932642 242942173 . + . gene\_id "XLOC\_030062"; transcript\_id "TCONS\_00050459"; exon\_number "3";  
oId "CUFF.57104.21"; tss\_id "TSS37936";  
chr2 Cufflinks exon242863612 242863820 . + . gene\_id "XLOC\_030076"; transcript\_id "TCONS\_00050450"; exon\_number "1";  
oId "CUFF.57126.1"; tss\_id "TSS37950";  
chr2 Cufflinks exon242863981 242864030 . + . gene\_id "XLOC\_030076"; transcript\_id "TCONS\_00050450"; exon\_number "2";  
oId "CUFF.57126.1"; tss\_id "TSS37950";  
chr2 Cufflinks exon387265 388593 . - . gene\_id "XLOC\_030100"; transcript\_id "TCONS\_00050497"; exon\_number "1"; oId  
"CUFF.48583.2"; tss\_id "TSS37980";  
chr2 Cufflinks exon390677 394697 . - . gene\_id "XLOC\_030100"; transcript\_id "TCONS\_00050497"; exon\_number "2"; oId  
"CUFF.48583.2"; tss\_id "TSS37980";  
chr2 Cufflinks exon779837 780588 . - . gene\_id "XLOC\_030113"; transcript\_id "TCONS\_00050512"; exon\_number "1"; oId  
"CUFF.48613.1"; tss\_id "TSS37994";  
chr2 Cufflinks exon806037 806257 . - . gene\_id "XLOC\_030113"; transcript\_id "TCONS\_00050512"; exon\_number "2"; oId  
"CUFF.48613.1"; tss\_id "TSS37994";  
chr2 Cufflinks exon863804 864112 . - . gene\_id "XLOC\_030113"; transcript\_id "TCONS\_00050512"; exon\_number "3"; oId  
"CUFF.48613.1"; tss\_id "TSS37994";  
chr2 Cufflinks exon837625 841500 . - . gene\_id "XLOC\_030113"; transcript\_id "TCONS\_00050517"; exon\_number "1"; oId  
"CUFF.48613.3"; tss\_id "TSS37996";  
chr2 Cufflinks exon863544 863799 . - . gene\_id "XLOC\_030113"; transcript\_id "TCONS\_00050517"; exon\_number "2"; oId  
"CUFF.48613.3"; tss\_id "TSS37996";  
chr2 Cufflinks exon842777 849557 . - . gene\_id "XLOC\_030113"; transcript\_id "TCONS\_00050519"; exon\_number "1"; oId  
"CUFF.48613.6"; tss\_id "TSS37994";  
chr2 Cufflinks exon849658 851101 . - . gene\_id "XLOC\_030113"; transcript\_id "TCONS\_00050519"; exon\_number "2"; oId  
"CUFF.48613.6"; tss\_id "TSS37994";  
chr2 Cufflinks exon863804 864169 . - . gene\_id "XLOC\_030113"; transcript\_id "TCONS\_00050519"; exon\_number "3"; oId  
"CUFF.48613.6"; tss\_id "TSS37994";  
chr2 Cufflinks exon842777 849896 . - . gene\_id "XLOC\_030113"; transcript\_id "TCONS\_00050518"; exon\_number "1"; oId  
"CUFF.48613.5"; tss\_id "TSS37994";  
chr2 Cufflinks exon850902 851101 . - . gene\_id "XLOC\_030113"; transcript\_id "TCONS\_00050518"; exon\_number "2"; oId  
"CUFF.48613.5"; tss\_id "TSS37994";  
chr2 Cufflinks exon863804 864169 . - . gene\_id "XLOC\_030113"; transcript\_id "TCONS\_00050518"; exon\_number "3"; oId  
"CUFF.48613.5"; tss\_id "TSS37994";  
chr2 Cufflinks exon842777 849896 . - . gene\_id "XLOC\_030113"; transcript\_id "TCONS\_00050520"; exon\_number "1"; oId  
"CUFF.48613.4"; tss\_id "TSS37997";  
chr2 Cufflinks exon863804 864331 . - . gene\_id "XLOC\_030113"; transcript\_id "TCONS\_00050520"; exon\_number "2"; oId  
"CUFF.48613.4"; tss\_id "TSS37997";  
chr2 Cufflinks exon842777 850103 . - . gene\_id "XLOC\_030113"; transcript\_id "TCONS\_00050521"; exon\_number "1"; oId  
"CUFF.48613.7"; tss\_id "TSS37998";  
chr2 Cufflinks exon850896 851101 . - . gene\_id "XLOC\_030113"; transcript\_id "TCONS\_00050521"; exon\_number "2"; oId

"CUFF.48613.7"; tss\_id "TSS37998";  
chr2 Cufflinks exon863804 866251 . - . gene\_id "XLOC\_030113"; transcript\_id "TCONS\_00050521"; exon\_number "3"; oId  
"CUFF.48613.7"; tss\_id "TSS37998";  
chr2 Cufflinks exon902805 903944 . - . gene\_id "XLOC\_030122"; transcript\_id "TCONS\_00050528"; exon\_number "1"; oId  
"CUFF.48641.2"; tss\_id "TSS38008";  
chr2 Cufflinks exon905629 905863 . - . gene\_id "XLOC\_030122"; transcript\_id "TCONS\_00050528"; exon\_number "2"; oId  
"CUFF.48641.2"; tss\_id "TSS38008";  
chr2 Cufflinks exon902805 905882 . - . gene\_id "XLOC\_030122"; transcript\_id "TCONS\_00050529"; exon\_number "1"; oId  
"CUFF.48641.1"; tss\_id "TSS38008";  
chr2 Cufflinks exon905925 905962 . - . gene\_id "XLOC\_030122"; transcript\_id "TCONS\_00050529"; exon\_number "2"; oId  
"CUFF.48641.1"; tss\_id "TSS38008";  
chr2 Cufflinks exon945058 945487 . - . gene\_id "XLOC\_030125"; transcript\_id "TCONS\_00050532"; exon\_number "1"; oId  
"CUFF.48647.1"; tss\_id "TSS38011";  
chr2 Cufflinks exon945597 946072 . - . gene\_id "XLOC\_030125"; transcript\_id "TCONS\_00050532"; exon\_number "2"; oId  
"CUFF.48647.1"; tss\_id "TSS38011";  
chr2 Cufflinks exon946234 946391 . - . gene\_id "XLOC\_030125"; transcript\_id "TCONS\_00050532"; exon\_number "3"; oId  
"CUFF.48647.1"; tss\_id "TSS38011";  
chr2 Cufflinks exon1769838 1777241 . - . gene\_id "XLOC\_030133"; transcript\_id "TCONS\_00050552"; exon\_number "1"; oId  
"CUFF.48686.6"; tss\_id "TSS38025";  
chr2 Cufflinks exon1784997 1785192 . - . gene\_id "XLOC\_030133"; transcript\_id "TCONS\_00050552"; exon\_number "2"; oId  
"CUFF.48686.6"; tss\_id "TSS38025";  
chr2 Cufflinks exon6967534 6969086 . - . gene\_id "XLOC\_030169"; transcript\_id "TCONS\_00050597"; exon\_number "1"; oId  
"CUFF.48809.2"; tss\_id "TSS38070";  
chr2 Cufflinks exon6970099 6970237 . - . gene\_id "XLOC\_030169"; transcript\_id "TCONS\_00050597"; exon\_number "2"; oId  
"CUFF.48809.2"; tss\_id "TSS38070";  
chr2 Cufflinks exon6973445 6973561 . - . gene\_id "XLOC\_030169"; transcript\_id "TCONS\_00050597"; exon\_number "3"; oId  
"CUFF.48809.2"; tss\_id "TSS38070";  
chr2 Cufflinks exon6980422 6980595 . - . gene\_id "XLOC\_030169"; transcript\_id "TCONS\_00050597"; exon\_number "4"; oId  
"CUFF.48809.2"; tss\_id "TSS38070";  
chr2 Cufflinks exon7045856 7051341 . - . gene\_id "XLOC\_030170"; transcript\_id "TCONS\_00050601"; exon\_number "1"; oId  
"CUFF.48827.5"; tss\_id "TSS38073";  
chr2 Cufflinks exon7052870 7054607 . - . gene\_id "XLOC\_030170"; transcript\_id "TCONS\_00050601"; exon\_number "2"; oId  
"CUFF.48827.5"; tss\_id "TSS38073";  
chr2 Cufflinks exon7045856 7050994 . - . gene\_id "XLOC\_030170"; transcript\_id "TCONS\_00050602"; exon\_number "1"; oId  
"CUFF.48827.3"; tss\_id "TSS38074";  
chr2 Cufflinks exon7052870 7053795 . - . gene\_id "XLOC\_030170"; transcript\_id "TCONS\_00050602"; exon\_number "2"; oId  
"CUFF.48827.3"; tss\_id "TSS38074";  
chr2 Cufflinks exon7054324 7054386 . - . gene\_id "XLOC\_030170"; transcript\_id "TCONS\_00050602"; exon\_number "3"; oId  
"CUFF.48827.3"; tss\_id "TSS38074";  
chr2 Cufflinks exon7055954 7056132 . - . gene\_id "XLOC\_030170"; transcript\_id "TCONS\_00050602"; exon\_number "4"; oId  
"CUFF.48827.3"; tss\_id "TSS38074";  
chr2 Cufflinks exon7045856 7053795 . - . gene\_id "XLOC\_030170"; transcript\_id "TCONS\_00050603"; exon\_number "1"; oId  
"CUFF.48827.1"; tss\_id "TSS38075";

chr2 Cufflinks exon7054324 7054481 . - . gene\_id "XLOC\_030170"; transcript\_id "TCONS\_00050603"; exon\_number "2"; oId  
"CUFF.48827.1"; tss\_id "TSS38075";

chr2 Cufflinks exon7055954 7056098 . - . gene\_id "XLOC\_030170"; transcript\_id "TCONS\_00050603"; exon\_number "3"; oId  
"CUFF.48827.1"; tss\_id "TSS38075";

chr2 Cufflinks exon 7056981 7057355 . - . gene\_id "XLOC\_030170"; transcript\_id "TCONS\_00050603"; exon\_number "4"; oId  
"CUFF.48827.1"; tss\_id "TSS38075";

chr2 Cufflinks exon 7058533 7058813 . - . gene\_id "XLOC\_030170"; transcript\_id "TCONS\_00050603"; exon\_number "5"; oId  
"CUFF.48827.1"; tss\_id "TSS38075";

chr2 Cufflinks exon 7045856 7053795 . - . gene\_id "XLOC\_030170"; transcript\_id "TCONS\_00050604"; exon\_number "1"; oId  
"CUFF.48827.4"; tss\_id "TSS38075";

chr2 Cufflinks exon 7054324 7054481 . - . gene\_id "XLOC\_030170"; transcript\_id "TCONS\_00050604"; exon\_number "2"; oId  
"CUFF.48827.4"; tss\_id "TSS38075";

chr2 Cufflinks exon 7055954 7057355 . - . gene\_id "XLOC\_030170"; transcript\_id "TCONS\_00050604"; exon\_number "3"; oId  
"CUFF.48827.4"; tss\_id "TSS38075";

chr2 Cufflinks exon 7058416 7058847 . - . gene\_id "XLOC\_030170"; transcript\_id "TCONS\_00050604"; exon\_number "4"; oId  
"CUFF.48827.4"; tss\_id "TSS38075";

chr2 Cufflinks exon 7045856 7053795 . - . gene\_id "XLOC\_030170"; transcript\_id "TCONS\_00050605"; exon\_number "1"; oId  
"CUFF.48827.2"; tss\_id "TSS38075";

chr2 Cufflinks exon 7054324 7054481 . - . gene\_id "XLOC\_030170"; transcript\_id "TCONS\_00050605"; exon\_number "2"; oId  
"CUFF.48827.2"; tss\_id "TSS38075";

chr2 Cufflinks exon 7055954 7056098 . - . gene\_id "XLOC\_030170"; transcript\_id "TCONS\_00050605"; exon\_number "3"; oId  
"CUFF.48827.2"; tss\_id "TSS38075";

chr2 Cufflinks exon 7056947 7057355 . - . gene\_id "XLOC\_030170"; transcript\_id "TCONS\_00050605"; exon\_number "4"; oId  
"CUFF.48827.2"; tss\_id "TSS38075";

chr2 Cufflinks exon 7058416 7058859 . - . gene\_id "XLOC\_030170"; transcript\_id "TCONS\_00050605"; exon\_number "5"; oId  
"CUFF.48827.2"; tss\_id "TSS38075";

chr2 Cufflinks exon 8026898 8027193 . - . gene\_id "XLOC\_030171"; transcript\_id "TCONS\_00050606"; exon\_number "1"; oId  
"CUFF.48865.1"; tss\_id "TSS38076";

chr2 Cufflinks exon 8027906 8027940 . - . gene\_id "XLOC\_030171"; transcript\_id "TCONS\_00050606"; exon\_number "2"; oId  
"CUFF.48865.1"; tss\_id "TSS38076";

chr2 Cufflinks exon 8029617 8029690 . - . gene\_id "XLOC\_030171"; transcript\_id "TCONS\_00050606"; exon\_number "3"; oId  
"CUFF.48865.1"; tss\_id "TSS38076";

chr2 Cufflinks exon 8036196 8036303 . - . gene\_id "XLOC\_030171"; transcript\_id "TCONS\_00050606"; exon\_number "4"; oId  
"CUFF.48865.1"; tss\_id "TSS38076";

chr2 Cufflinks exon 8037740 8037913 . - . gene\_id "XLOC\_030171"; transcript\_id "TCONS\_00050606"; exon\_number "5"; oId  
"CUFF.48865.1"; tss\_id "TSS38076";

chr2 Cufflinks exon 8039737 8039786 . - . gene\_id "XLOC\_030171"; transcript\_id "TCONS\_00050606"; exon\_number "6"; oId  
"CUFF.48865.1"; tss\_id "TSS38076";

chr2 Cufflinks exon 8027673 8027940 . - . gene\_id "XLOC\_030171"; transcript\_id "TCONS\_00050607"; exon\_number "1"; oId  
"CUFF.48865.2"; tss\_id "TSS38076";

chr2 Cufflinks exon 8029617 8029690 . - . gene\_id "XLOC\_030171"; transcript\_id "TCONS\_00050607"; exon\_number "2"; oId  
"CUFF.48865.2"; tss\_id "TSS38076";

chr2 Cufflinks exon 8036196 8036303 . - . gene\_id "XLOC\_030171"; transcript\_id "TCONS\_00050607"; exon\_number "3"; oId

"CUFF.48865.2"; tss\_id "TSS38076";  
chr2 Cufflinks exon 8037740 8037913 . - . gene\_id "XLOC\_030171"; transcript\_id "TCONS\_00050607"; exon\_number "4"; oId  
"CUFF.48865.2"; tss\_id "TSS38076";  
chr2 Cufflinks exon 8039737 8039786 . - . gene\_id "XLOC\_030171"; transcript\_id "TCONS\_00050607"; exon\_number "5"; oId  
"CUFF.48865.2"; tss\_id "TSS38076";  
chr2 Cufflinks exon 8028774 8029690 . - . gene\_id "XLOC\_030171"; transcript\_id "TCONS\_00050608"; exon\_number "1"; oId  
"CUFF.48865.3"; tss\_id "TSS38077";  
chr2 Cufflinks exon 8036196 8036303 . - . gene\_id "XLOC\_030171"; transcript\_id "TCONS\_00050608"; exon\_number "2"; oId  
"CUFF.48865.3"; tss\_id "TSS38077";  
chr2 Cufflinks exon 8037740 8037913 . - . gene\_id "XLOC\_030171"; transcript\_id "TCONS\_00050608"; exon\_number "3"; oId  
"CUFF.48865.3"; tss\_id "TSS38077";  
chr2 Cufflinks exon 8039276 8039324 . - . gene\_id "XLOC\_030171"; transcript\_id "TCONS\_00050608"; exon\_number "4"; oId  
"CUFF.48865.3"; tss\_id "TSS38077";  
chr2 Cufflinks exon 8810608 8811409 . - . gene\_id "XLOC\_030185"; transcript\_id "TCONS\_00050624"; exon\_number "1"; oId  
"CUFF.48884.1"; tss\_id "TSS38093";  
chr2 Cufflinks exon 8811713 8811962 . - . gene\_id "XLOC\_030185"; transcript\_id "TCONS\_00050624"; exon\_number "2"; oId  
"CUFF.48884.1"; tss\_id "TSS38093";  
chr2 Cufflinks exon 8810608 8811407 . - . gene\_id "XLOC\_030185"; transcript\_id "TCONS\_00050625"; exon\_number "1"; oId  
"CUFF.48884.2"; tss\_id "TSS38094";  
chr2 Cufflinks exon 8811711 8811902 . - . gene\_id "XLOC\_030185"; transcript\_id "TCONS\_00050625"; exon\_number "2"; oId  
"CUFF.48884.2"; tss\_id "TSS38094";  
chr2 Cufflinks exon 8813167 8813437 . - . gene\_id "XLOC\_030185"; transcript\_id "TCONS\_00050625"; exon\_number "3"; oId  
"CUFF.48884.2"; tss\_id "TSS38094";  
chr2 Cufflinks exon 8815874 8816365 . - . gene\_id "XLOC\_030185"; transcript\_id "TCONS\_00050625"; exon\_number "4"; oId  
"CUFF.48884.2"; tss\_id "TSS38094";  
chr2 Cufflinks exon 8810608 8811407 . - . gene\_id "XLOC\_030185"; transcript\_id "TCONS\_00050626"; exon\_number "1"; oId  
"CUFF.48884.3"; tss\_id "TSS38095";  
chr2 Cufflinks exon 8811711 8811902 . - . gene\_id "XLOC\_030185"; transcript\_id "TCONS\_00050626"; exon\_number "2"; oId  
"CUFF.48884.3"; tss\_id "TSS38095";  
chr2 Cufflinks exon 8813167 8813437 . - . gene\_id "XLOC\_030185"; transcript\_id "TCONS\_00050626"; exon\_number "3"; oId  
"CUFF.48884.3"; tss\_id "TSS38095";  
chr2 Cufflinks exon 8821957 8821993 . - . gene\_id "XLOC\_030185"; transcript\_id "TCONS\_00050626"; exon\_number "4"; oId  
"CUFF.48884.3"; tss\_id "TSS38095";  
chr2 Cufflinks exon 8819939 8820717 . - . gene\_id "XLOC\_030185"; transcript\_id "TCONS\_00050627"; exon\_number "1"; oId  
"CUFF.48884.4"; tss\_id "TSS38095";  
chr2 Cufflinks exon 8821957 8821991 . - . gene\_id "XLOC\_030185"; transcript\_id "TCONS\_00050627"; exon\_number "2"; oId  
"CUFF.48884.4"; tss\_id "TSS38095";  
chr2 Cufflinks exon10427859 10428607 . - . gene\_id "XLOC\_030206"; transcript\_id "TCONS\_00050660"; exon\_number "1";  
oId "CUFF.48979.7"; tss\_id "TSS38124";  
chr2 Cufflinks exon10429233 10429297 . - . gene\_id "XLOC\_030206"; transcript\_id "TCONS\_00050660"; exon\_number "2";  
oId "CUFF.48979.7"; tss\_id "TSS38124";  
chr2 Cufflinks exon10440980 10441139 . - . gene\_id "XLOC\_030206"; transcript\_id "TCONS\_00050660"; exon\_number "3";  
oId "CUFF.48979.7"; tss\_id "TSS38124";

|                                        |          |   |   |   |                                                                         |
|----------------------------------------|----------|---|---|---|-------------------------------------------------------------------------|
| chr2 Cufflinks exon10441704            | 10442086 | . | - | . | gene_id "XLOC_030206"; transcript_id "TCONS_00050660"; exon_number "4"; |
| oId "CUFF.48979.7"; tss_id "TSS38124"; |          |   |   |   |                                                                         |
| chr2 Cufflinks exon10442158            | 10442588 | . | - | . | gene_id "XLOC_030206"; transcript_id "TCONS_00050660"; exon_number "5"; |
| oId "CUFF.48979.7"; tss_id "TSS38124"; |          |   |   |   |                                                                         |
| chr2 Cufflinks exon10427859            | 10428607 | . | - | . | gene_id "XLOC_030206"; transcript_id "TCONS_00050662"; exon_number "1"; |
| oId "CUFF.48979.3"; tss_id "TSS38124"; |          |   |   |   |                                                                         |
| chr2 Cufflinks exon10429233            | 10429287 | . | - | . | gene_id "XLOC_030206"; transcript_id "TCONS_00050662"; exon_number "2"; |
| oId "CUFF.48979.3"; tss_id "TSS38124"; |          |   |   |   |                                                                         |
| chr2 Cufflinks exon10440970            | 10441139 | . | - | . | gene_id "XLOC_030206"; transcript_id "TCONS_00050662"; exon_number "3"; |
| oId "CUFF.48979.3"; tss_id "TSS38124"; |          |   |   |   |                                                                         |
| chr2 Cufflinks exon10442158            | 10442614 | . | - | . | gene_id "XLOC_030206"; transcript_id "TCONS_00050662"; exon_number "4"; |
| oId "CUFF.48979.3"; tss_id "TSS38124"; |          |   |   |   |                                                                         |
| chr2 Cufflinks exon10427859            | 10428607 | . | - | . | gene_id "XLOC_030206"; transcript_id "TCONS_00050661"; exon_number "1"; |
| oId "CUFF.48979.1"; tss_id "TSS38124"; |          |   |   |   |                                                                         |
| chr2 Cufflinks exon10429233            | 10429297 | . | - | . | gene_id "XLOC_030206"; transcript_id "TCONS_00050661"; exon_number "2"; |
| oId "CUFF.48979.1"; tss_id "TSS38124"; |          |   |   |   |                                                                         |
| chr2 Cufflinks exon10440980            | 10441139 | . | - | . | gene_id "XLOC_030206"; transcript_id "TCONS_00050661"; exon_number "3"; |
| oId "CUFF.48979.1"; tss_id "TSS38124"; |          |   |   |   |                                                                         |
| chr2 Cufflinks exon10441950            | 10442086 | . | - | . | gene_id "XLOC_030206"; transcript_id "TCONS_00050661"; exon_number "4"; |
| oId "CUFF.48979.1"; tss_id "TSS38124"; |          |   |   |   |                                                                         |
| chr2 Cufflinks exon10442158            | 10442614 | . | - | . | gene_id "XLOC_030206"; transcript_id "TCONS_00050661"; exon_number "5"; |
| oId "CUFF.48979.1"; tss_id "TSS38124"; |          |   |   |   |                                                                         |
| chr2 Cufflinks exon10427859            | 10428607 | . | - | . | gene_id "XLOC_030206"; transcript_id "TCONS_00050665"; exon_number "1"; |
| oId "CUFF.48979.5"; tss_id "TSS38124"; |          |   |   |   |                                                                         |
| chr2 Cufflinks exon10429233            | 10429444 | . | - | . | gene_id "XLOC_030206"; transcript_id "TCONS_00050665"; exon_number "2"; |
| oId "CUFF.48979.5"; tss_id "TSS38124"; |          |   |   |   |                                                                         |
| chr2 Cufflinks exon10440968            | 10441139 | . | - | . | gene_id "XLOC_030206"; transcript_id "TCONS_00050665"; exon_number "3"; |
| oId "CUFF.48979.5"; tss_id "TSS38124"; |          |   |   |   |                                                                         |
| chr2 Cufflinks exon10441704            | 10442628 | . | - | . | gene_id "XLOC_030206"; transcript_id "TCONS_00050665"; exon_number "4"; |
| oId "CUFF.48979.5"; tss_id "TSS38124"; |          |   |   |   |                                                                         |
| chr2 Cufflinks exon10427859            | 10428607 | . | - | . | gene_id "XLOC_030206"; transcript_id "TCONS_00050664"; exon_number "1"; |
| oId "CUFF.48979.4"; tss_id "TSS38124"; |          |   |   |   |                                                                         |
| chr2 Cufflinks exon10429233            | 10429285 | . | - | . | gene_id "XLOC_030206"; transcript_id "TCONS_00050664"; exon_number "2"; |
| oId "CUFF.48979.4"; tss_id "TSS38124"; |          |   |   |   |                                                                         |
| chr2 Cufflinks exon10440968            | 10441139 | . | - | . | gene_id "XLOC_030206"; transcript_id "TCONS_00050664"; exon_number "3"; |
| oId "CUFF.48979.4"; tss_id "TSS38124"; |          |   |   |   |                                                                         |
| chr2 Cufflinks exon10441704            | 10442628 | . | - | . | gene_id "XLOC_030206"; transcript_id "TCONS_00050664"; exon_number "4"; |
| oId "CUFF.48979.4"; tss_id "TSS38124"; |          |   |   |   |                                                                         |
| chr2 Cufflinks exon10427859            | 10428607 | . | - | . | gene_id "XLOC_030206"; transcript_id "TCONS_00050663"; exon_number "1"; |
| oId "CUFF.48979.2"; tss_id "TSS38124"; |          |   |   |   |                                                                         |
| chr2 Cufflinks exon10429233            | 10429287 | . | - | . | gene_id "XLOC_030206"; transcript_id "TCONS_00050663"; exon_number "2"; |
| oId "CUFF.48979.2"; tss_id "TSS38124"; |          |   |   |   |                                                                         |
| chr2 Cufflinks exon10440970            | 10442628 | . | - | . | gene_id "XLOC_030206"; transcript_id "TCONS_00050663"; exon_number "3"; |

|                                        |   |   |   |                                                                         |  |
|----------------------------------------|---|---|---|-------------------------------------------------------------------------|--|
| oId "CUFF.48979.2"; tss_id "TSS38124"; |   |   |   |                                                                         |  |
| chr2 Cufflinks exon12213429 12213930   | . | - | . | gene_id "XLOC_030227"; transcript_id "TCONS_00050689"; exon_number "1"; |  |
| oId "CUFF.49048.2"; tss_id "TSS38145"; |   |   |   |                                                                         |  |
| chr2 Cufflinks exon12214103 12214515   | . | - | . | gene_id "XLOC_030227"; transcript_id "TCONS_00050689"; exon_number "2"; |  |
| oId "CUFF.49048.2"; tss_id "TSS38145"; |   |   |   |                                                                         |  |
| chr2 Cufflinks exon16406511 16408573   | . | - | . | gene_id "XLOC_030241"; transcript_id "TCONS_00050710"; exon_number "1"; |  |
| oId "CUFF.49090.1"; tss_id "TSS38163"; |   |   |   |                                                                         |  |
| chr2 Cufflinks exon16409548 16410645   | . | - | . | gene_id "XLOC_030241"; transcript_id "TCONS_00050710"; exon_number "2"; |  |
| oId "CUFF.49090.1"; tss_id "TSS38163"; |   |   |   |                                                                         |  |
| chr2 Cufflinks exon16472076 16474147   | . | - | . | gene_id "XLOC_030243"; transcript_id "TCONS_00050712"; exon_number "1"; |  |
| oId "CUFF.49101.1"; tss_id "TSS38165"; |   |   |   |                                                                         |  |
| chr2 Cufflinks exon16476330 16476392   | . | - | . | gene_id "XLOC_030243"; transcript_id "TCONS_00050712"; exon_number "2"; |  |
| oId "CUFF.49101.1"; tss_id "TSS38165"; |   |   |   |                                                                         |  |
| chr2 Cufflinks exon16479241 16479286   | . | - | . | gene_id "XLOC_030243"; transcript_id "TCONS_00050712"; exon_number "3"; |  |
| oId "CUFF.49101.1"; tss_id "TSS38165"; |   |   |   |                                                                         |  |
| chr2 Cufflinks exon16472076 16474147   | . | - | . | gene_id "XLOC_030243"; transcript_id "TCONS_00050714"; exon_number "1"; |  |
| oId "CUFF.49101.5"; tss_id "TSS38166"; |   |   |   |                                                                         |  |
| chr2 Cufflinks exon16474871 16479360   | . | - | . | gene_id "XLOC_030243"; transcript_id "TCONS_00050714"; exon_number "2"; |  |
| oId "CUFF.49101.5"; tss_id "TSS38166"; |   |   |   |                                                                         |  |
| chr2 Cufflinks exon16480212 16480310   | . | - | . | gene_id "XLOC_030243"; transcript_id "TCONS_00050714"; exon_number "3"; |  |
| oId "CUFF.49101.5"; tss_id "TSS38166"; |   |   |   |                                                                         |  |
| chr2 Cufflinks exon16483039 16483188   | . | - | . | gene_id "XLOC_030243"; transcript_id "TCONS_00050714"; exon_number "4"; |  |
| oId "CUFF.49101.5"; tss_id "TSS38166"; |   |   |   |                                                                         |  |
| chr2 Cufflinks exon16483328 16483557   | . | - | . | gene_id "XLOC_030243"; transcript_id "TCONS_00050714"; exon_number "5"; |  |
| oId "CUFF.49101.5"; tss_id "TSS38166"; |   |   |   |                                                                         |  |
| chr2 Cufflinks exon16486425 16486461   | . | - | . | gene_id "XLOC_030243"; transcript_id "TCONS_00050714"; exon_number "6"; |  |
| oId "CUFF.49101.5"; tss_id "TSS38166"; |   |   |   |                                                                         |  |
| chr2 Cufflinks exon16472076 16479360   | . | - | . | gene_id "XLOC_030243"; transcript_id "TCONS_00050713"; exon_number "1"; |  |
| oId "CUFF.49101.4"; tss_id "TSS38166"; |   |   |   |                                                                         |  |
| chr2 Cufflinks exon16480212 16480310   | . | - | . | gene_id "XLOC_030243"; transcript_id "TCONS_00050713"; exon_number "2"; |  |
| oId "CUFF.49101.4"; tss_id "TSS38166"; |   |   |   |                                                                         |  |
| chr2 Cufflinks exon16483039 16483188   | . | - | . | gene_id "XLOC_030243"; transcript_id "TCONS_00050713"; exon_number "3"; |  |
| oId "CUFF.49101.4"; tss_id "TSS38166"; |   |   |   |                                                                         |  |
| chr2 Cufflinks exon16483328 16483557   | . | - | . | gene_id "XLOC_030243"; transcript_id "TCONS_00050713"; exon_number "4"; |  |
| oId "CUFF.49101.4"; tss_id "TSS38166"; |   |   |   |                                                                         |  |
| chr2 Cufflinks exon16486425 16486461   | . | - | . | gene_id "XLOC_030243"; transcript_id "TCONS_00050713"; exon_number "5"; |  |
| oId "CUFF.49101.4"; tss_id "TSS38166"; |   |   |   |                                                                         |  |
| chr2 Cufflinks exon16577934 16583994   | . | - | . | gene_id "XLOC_030252"; transcript_id "TCONS_00050723"; exon_number "1"; |  |
| oId "CUFF.49117.1"; tss_id "TSS38175"; |   |   |   |                                                                         |  |
| chr2 Cufflinks exon16587373 16602175   | . | - | . | gene_id "XLOC_030252"; transcript_id "TCONS_00050723"; exon_number "2"; |  |
| oId "CUFF.49117.1"; tss_id "TSS38175"; |   |   |   |                                                                         |  |
| chr2 Cufflinks exon16577934 16609086   | . | - | . | gene_id "XLOC_030252"; transcript_id "TCONS_00050724"; exon_number "1"; |  |
| oId "CUFF.49117.2"; tss_id "TSS38176"; |   |   |   |                                                                         |  |

|                                        |          |   |   |   |                                                                         |
|----------------------------------------|----------|---|---|---|-------------------------------------------------------------------------|
| chr2 Cufflinks exon16612276            | 16617118 | . | - | . | gene_id "XLOC_030252"; transcript_id "TCONS_00050724"; exon_number "2"; |
| oId "CUFF.49117.2"; tss_id "TSS38176"; |          |   |   |   |                                                                         |
| chr2 Cufflinks exon16577934            | 16609086 | . | - | . | gene_id "XLOC_030252"; transcript_id "TCONS_00050726"; exon_number "1"; |
| oId "CUFF.49117.4"; tss_id "TSS38178"; |          |   |   |   |                                                                         |
| chr2 Cufflinks exon16610611            | 16612426 | . | - | . | gene_id "XLOC_030252"; transcript_id "TCONS_00050726"; exon_number "2"; |
| oId "CUFF.49117.4"; tss_id "TSS38178"; |          |   |   |   |                                                                         |
| chr2 Cufflinks exon16612546            | 16612651 | . | - | . | gene_id "XLOC_030252"; transcript_id "TCONS_00050726"; exon_number "3"; |
| oId "CUFF.49117.4"; tss_id "TSS38178"; |          |   |   |   |                                                                         |
| chr2 Cufflinks exon16615707            | 16619524 | . | - | . | gene_id "XLOC_030252"; transcript_id "TCONS_00050726"; exon_number "4"; |
| oId "CUFF.49117.4"; tss_id "TSS38178"; |          |   |   |   |                                                                         |
| chr2 Cufflinks exon16577934            | 16612425 | . | - | . | gene_id "XLOC_030252"; transcript_id "TCONS_00050727"; exon_number "1"; |
| oId "CUFF.49117.3"; tss_id "TSS38179"; |          |   |   |   |                                                                         |
| chr2 Cufflinks exon16612545            | 16612651 | . | - | . | gene_id "XLOC_030252"; transcript_id "TCONS_00050727"; exon_number "2"; |
| oId "CUFF.49117.3"; tss_id "TSS38179"; |          |   |   |   |                                                                         |
| chr2 Cufflinks exon16615707            | 16615851 | . | - | . | gene_id "XLOC_030252"; transcript_id "TCONS_00050727"; exon_number "3"; |
| oId "CUFF.49117.3"; tss_id "TSS38179"; |          |   |   |   |                                                                         |
| chr2 Cufflinks exon16617742            | 16620236 | . | - | . | gene_id "XLOC_030252"; transcript_id "TCONS_00050727"; exon_number "4"; |
| oId "CUFF.49117.3"; tss_id "TSS38179"; |          |   |   |   |                                                                         |
| chr2 Cufflinks exon16649220            | 16650013 | . | - | . | gene_id "XLOC_030253"; transcript_id "TCONS_00050728"; exon_number "1"; |
| oId "CUFF.49120.1"; tss_id "TSS38180"; |          |   |   |   |                                                                         |
| chr2 Cufflinks exon16651161            | 16651243 | . | - | . | gene_id "XLOC_030253"; transcript_id "TCONS_00050728"; exon_number "2"; |
| oId "CUFF.49120.1"; tss_id "TSS38180"; |          |   |   |   |                                                                         |
| chr2 Cufflinks exon16659537            | 16659822 | . | - | . | gene_id "XLOC_030253"; transcript_id "TCONS_00050728"; exon_number "3"; |
| oId "CUFF.49120.1"; tss_id "TSS38180"; |          |   |   |   |                                                                         |
| chr2 Cufflinks exon16649220            | 16650017 | . | - | . | gene_id "XLOC_030253"; transcript_id "TCONS_00050729"; exon_number "1"; |
| oId "CUFF.49120.2"; tss_id "TSS38181"; |          |   |   |   |                                                                         |
| chr2 Cufflinks exon16651161            | 16651243 | . | - | . | gene_id "XLOC_030253"; transcript_id "TCONS_00050729"; exon_number "2"; |
| oId "CUFF.49120.2"; tss_id "TSS38181"; |          |   |   |   |                                                                         |
| chr2 Cufflinks exon16659537            | 16659661 | . | - | . | gene_id "XLOC_030253"; transcript_id "TCONS_00050729"; exon_number "3"; |
| oId "CUFF.49120.2"; tss_id "TSS38181"; |          |   |   |   |                                                                         |
| chr2 Cufflinks exon16665516            | 16665679 | . | - | . | gene_id "XLOC_030253"; transcript_id "TCONS_00050729"; exon_number "4"; |
| oId "CUFF.49120.2"; tss_id "TSS38181"; |          |   |   |   |                                                                         |
| chr2 Cufflinks exon19406542            | 19406729 | . | - | . | gene_id "XLOC_030264"; transcript_id "TCONS_00050746"; exon_number "1"; |
| oId "CUFF.49179.1"; tss_id "TSS38193"; |          |   |   |   |                                                                         |
| chr2 Cufflinks exon19546405            | 19547772 | . | - | . | gene_id "XLOC_030264"; transcript_id "TCONS_00050746"; exon_number "2"; |
| oId "CUFF.49179.1"; tss_id "TSS38193"; |          |   |   |   |                                                                         |
| chr2 Cufflinks exon19492808            | 19492833 | . | - | . | gene_id "XLOC_030264"; transcript_id "TCONS_00050747"; exon_number "1"; |
| oId "CUFF.49179.2"; tss_id "TSS38193"; |          |   |   |   |                                                                         |
| chr2 Cufflinks exon19546405            | 19547760 | . | - | . | gene_id "XLOC_030264"; transcript_id "TCONS_00050747"; exon_number "2"; |
| oId "CUFF.49179.2"; tss_id "TSS38193"; |          |   |   |   |                                                                         |
| chr2 Cufflinks exon19543847            | 19546509 | . | - | . | gene_id "XLOC_030264"; transcript_id "TCONS_00050751"; exon_number "1"; |
| oId "CUFF.49179.4"; tss_id "TSS38193"; |          |   |   |   |                                                                         |
| chr2 Cufflinks exon19547749            | 19547764 | . | - | . | gene_id "XLOC_030264"; transcript_id "TCONS_00050751"; exon_number "2"; |

|                                        |   |   |   |                                                                         |  |
|----------------------------------------|---|---|---|-------------------------------------------------------------------------|--|
| oId "CUFF.49179.4"; tss_id "TSS38193"; |   |   |   |                                                                         |  |
| chr2 Cufflinks exon20878036 20878491   | . | - | . | gene_id "XLOC_030301"; transcript_id "TCONS_00050805"; exon_number "1"; |  |
| oId "CUFF.49230.3"; tss_id "TSS38244"; |   |   |   |                                                                         |  |
| chr2 Cufflinks exon20879167 20882252   | . | - | . | gene_id "XLOC_030301"; transcript_id "TCONS_00050805"; exon_number "2"; |  |
| oId "CUFF.49230.3"; tss_id "TSS38244"; |   |   |   |                                                                         |  |
| chr2 Cufflinks exon20878036 20879310   | . | - | . | gene_id "XLOC_030301"; transcript_id "TCONS_00050806"; exon_number "1"; |  |
| oId "CUFF.49230.2"; tss_id "TSS38245"; |   |   |   |                                                                         |  |
| chr2 Cufflinks exon20882279 20882348   | . | - | . | gene_id "XLOC_030301"; transcript_id "TCONS_00050806"; exon_number "2"; |  |
| oId "CUFF.49230.2"; tss_id "TSS38245"; |   |   |   |                                                                         |  |
| chr2 Cufflinks exon20883004 20883091   | . | - | . | gene_id "XLOC_030301"; transcript_id "TCONS_00050806"; exon_number "3"; |  |
| oId "CUFF.49230.2"; tss_id "TSS38245"; |   |   |   |                                                                         |  |
| chr2 Cufflinks exon25591873 25598712   | . | - | . | gene_id "XLOC_030333"; transcript_id "TCONS_00050880"; exon_number "1"; |  |
| oId "CUFF.49363.2"; tss_id "TSS38293"; |   |   |   |                                                                         |  |
| chr2 Cufflinks exon25599276 25599343   | . | - | . | gene_id "XLOC_030333"; transcript_id "TCONS_00050880"; exon_number "2"; |  |
| oId "CUFF.49363.2"; tss_id "TSS38293"; |   |   |   |                                                                         |  |
| chr2 Cufflinks exon28945400 28945876   | . | - | . | gene_id "XLOC_030384"; transcript_id "TCONS_00050954"; exon_number "1"; |  |
| oId "CUFF.49539.3"; tss_id "TSS38356"; |   |   |   |                                                                         |  |
| chr2 Cufflinks exon28970799 28970854   | . | - | . | gene_id "XLOC_030384"; transcript_id "TCONS_00050954"; exon_number "2"; |  |
| oId "CUFF.49539.3"; tss_id "TSS38356"; |   |   |   |                                                                         |  |
| chr2 Cufflinks exon28971692 28974343   | . | - | . | gene_id "XLOC_030384"; transcript_id "TCONS_00050954"; exon_number "3"; |  |
| oId "CUFF.49539.3"; tss_id "TSS38356"; |   |   |   |                                                                         |  |
| chr2 Cufflinks exon28945400 28945872   | . | - | . | gene_id "XLOC_030384"; transcript_id "TCONS_00050953"; exon_number "1"; |  |
| oId "CUFF.49539.2"; tss_id "TSS38356"; |   |   |   |                                                                         |  |
| chr2 Cufflinks exon28970799 28970848   | . | - | . | gene_id "XLOC_030384"; transcript_id "TCONS_00050953"; exon_number "2"; |  |
| oId "CUFF.49539.2"; tss_id "TSS38356"; |   |   |   |                                                                         |  |
| chr2 Cufflinks exon28971686 28974343   | . | - | . | gene_id "XLOC_030384"; transcript_id "TCONS_00050953"; exon_number "3"; |  |
| oId "CUFF.49539.2"; tss_id "TSS38356"; |   |   |   |                                                                         |  |
| chr2 Cufflinks exon28970130 28970848   | . | - | . | gene_id "XLOC_030384"; transcript_id "TCONS_00050961"; exon_number "1"; |  |
| oId "CUFF.49539.6"; tss_id "TSS38356"; |   |   |   |                                                                         |  |
| chr2 Cufflinks exon28971686 28974343   | . | - | . | gene_id "XLOC_030384"; transcript_id "TCONS_00050961"; exon_number "2"; |  |
| oId "CUFF.49539.6"; tss_id "TSS38356"; |   |   |   |                                                                         |  |
| chr2 Cufflinks exon33780129 33780381   | . | - | . | gene_id "XLOC_030421"; transcript_id "TCONS_00051011"; exon_number "1"; |  |
| oId "CUFF.49678.1"; tss_id "TSS38399"; |   |   |   |                                                                         |  |
| chr2 Cufflinks exon33788545 33788612   | . | - | . | gene_id "XLOC_030421"; transcript_id "TCONS_00051011"; exon_number "2"; |  |
| oId "CUFF.49678.1"; tss_id "TSS38399"; |   |   |   |                                                                         |  |
| chr2 Cufflinks exon33790300 33790332   | . | - | . | gene_id "XLOC_030421"; transcript_id "TCONS_00051011"; exon_number "3"; |  |
| oId "CUFF.49678.1"; tss_id "TSS38399"; |   |   |   |                                                                         |  |
| chr2 Cufflinks exon33792103 33792242   | . | - | . | gene_id "XLOC_030421"; transcript_id "TCONS_00051011"; exon_number "4"; |  |
| oId "CUFF.49678.1"; tss_id "TSS38399"; |   |   |   |                                                                         |  |
| chr2 Cufflinks exon43298947 43299698   | . | - | . | gene_id "XLOC_030487"; transcript_id "TCONS_00051119"; exon_number "1"; |  |
| oId "CUFF.49927.3"; tss_id "TSS38477"; |   |   |   |                                                                         |  |
| chr2 Cufflinks exon43325096 43325178   | . | - | . | gene_id "XLOC_030487"; transcript_id "TCONS_00051119"; exon_number "2"; |  |
| oId "CUFF.49927.3"; tss_id "TSS38477"; |   |   |   |                                                                         |  |



|                                        |          |   |   |   |                                                                         |
|----------------------------------------|----------|---|---|---|-------------------------------------------------------------------------|
| chr2 Cufflinks exon43359509            | 43359676 | . | - | . | gene_id "XLOC_030487"; transcript_id "TCONS_00051119"; exon_number "3"; |
| oId "CUFF.49927.3"; tss_id "TSS38477"; |          |   |   |   |                                                                         |
| chr2 Cufflinks exon43306833            | 43306846 | . | - | . | gene_id "XLOC_030489"; transcript_id "TCONS_00051121"; exon_number "1"; |
| oId "CUFF.49934.1"; tss_id "TSS38479"; |          |   |   |   |                                                                         |
| chr2 Cufflinks exon43307069            | 43308541 | . | - | . | gene_id "XLOC_030489"; transcript_id "TCONS_00051121"; exon_number "2"; |
| oId "CUFF.49934.1"; tss_id "TSS38479"; |          |   |   |   |                                                                         |
| chr2 Cufflinks exon45167293            | 45167972 | . | - | . | gene_id "XLOC_030524"; transcript_id "TCONS_00051162"; exon_number "1"; |
| oId "CUFF.50157.1"; tss_id "TSS38518"; |          |   |   |   |                                                                         |
| chr2 Cufflinks exon45168327            | 45168646 | . | - | . | gene_id "XLOC_030524"; transcript_id "TCONS_00051162"; exon_number "2"; |
| oId "CUFF.50157.1"; tss_id "TSS38518"; |          |   |   |   |                                                                         |
| chr2 Cufflinks exon45167293            | 45167972 | . | - | . | gene_id "XLOC_030524"; transcript_id "TCONS_00051163"; exon_number "1"; |
| oId "CUFF.50157.2"; tss_id "TSS38519"; |          |   |   |   |                                                                         |
| chr2 Cufflinks exon45168849            | 45169017 | . | - | . | gene_id "XLOC_030524"; transcript_id "TCONS_00051163"; exon_number "2"; |
| oId "CUFF.50157.2"; tss_id "TSS38519"; |          |   |   |   |                                                                         |
| chr2 Cufflinks exon45167293            | 45167972 | . | - | . | gene_id "XLOC_030524"; transcript_id "TCONS_00051164"; exon_number "1"; |
| oId "CUFF.50157.3"; tss_id "TSS38520"; |          |   |   |   |                                                                         |
| chr2 Cufflinks exon45169326            | 45169651 | . | - | . | gene_id "XLOC_030524"; transcript_id "TCONS_00051164"; exon_number "2"; |
| oId "CUFF.50157.3"; tss_id "TSS38520"; |          |   |   |   |                                                                         |
| chr2 Cufflinks exon45167293            | 45167972 | . | - | . | gene_id "XLOC_030524"; transcript_id "TCONS_00051165"; exon_number "1"; |
| oId "CUFF.50157.4"; tss_id "TSS38520"; |          |   |   |   |                                                                         |
| chr2 Cufflinks exon45169313            | 45169660 | . | - | . | gene_id "XLOC_030524"; transcript_id "TCONS_00051165"; exon_number "2"; |
| oId "CUFF.50157.4"; tss_id "TSS38520"; |          |   |   |   |                                                                         |
| chr2 Cufflinks exon45343043            | 45345182 | . | - | . | gene_id "XLOC_030527"; transcript_id "TCONS_00051168"; exon_number "1"; |
| oId "CUFF.50167.3"; tss_id "TSS38523"; |          |   |   |   |                                                                         |
| chr2 Cufflinks exon45348590            | 45348671 | . | - | . | gene_id "XLOC_030527"; transcript_id "TCONS_00051168"; exon_number "2"; |
| oId "CUFF.50167.3"; tss_id "TSS38523"; |          |   |   |   |                                                                         |
| chr2 Cufflinks exon45370351            | 45370366 | . | - | . | gene_id "XLOC_030527"; transcript_id "TCONS_00051168"; exon_number "3"; |
| oId "CUFF.50167.3"; tss_id "TSS38523"; |          |   |   |   |                                                                         |
| chr2 Cufflinks exon45343043            | 45345182 | . | - | . | gene_id "XLOC_030527"; transcript_id "TCONS_00051169"; exon_number "1"; |
| oId "CUFF.50167.1"; tss_id "TSS38524"; |          |   |   |   |                                                                         |
| chr2 Cufflinks exon45348590            | 45348662 | . | - | . | gene_id "XLOC_030527"; transcript_id "TCONS_00051169"; exon_number "2"; |
| oId "CUFF.50167.1"; tss_id "TSS38524"; |          |   |   |   |                                                                         |
| chr2 Cufflinks exon45370342            | 45370477 | . | - | . | gene_id "XLOC_030527"; transcript_id "TCONS_00051169"; exon_number "3"; |
| oId "CUFF.50167.1"; tss_id "TSS38524"; |          |   |   |   |                                                                         |
| chr2 Cufflinks exon45372111            | 45372764 | . | - | . | gene_id "XLOC_030527"; transcript_id "TCONS_00051169"; exon_number "4"; |
| oId "CUFF.50167.1"; tss_id "TSS38524"; |          |   |   |   |                                                                         |
| chr2 Cufflinks exon45343043            | 45343243 | . | - | . | gene_id "XLOC_030527"; transcript_id "TCONS_00051170"; exon_number "1"; |
| oId "CUFF.50167.2"; tss_id "TSS38525"; |          |   |   |   |                                                                         |
| chr2 Cufflinks exon45343810            | 45345182 | . | - | . | gene_id "XLOC_030527"; transcript_id "TCONS_00051170"; exon_number "2"; |
| oId "CUFF.50167.2"; tss_id "TSS38525"; |          |   |   |   |                                                                         |
| chr2 Cufflinks exon45348590            | 45348662 | . | - | . | gene_id "XLOC_030527"; transcript_id "TCONS_00051170"; exon_number "3"; |
| oId "CUFF.50167.2"; tss_id "TSS38525"; |          |   |   |   |                                                                         |
| chr2 Cufflinks exon45378266            | 45378376 | . | - | . | gene_id "XLOC_030527"; transcript_id "TCONS_00051170"; exon_number "4"; |

|                                        |   |   |   |                                                                         |  |
|----------------------------------------|---|---|---|-------------------------------------------------------------------------|--|
| oId "CUFF.50167.2"; tss_id "TSS38525"; |   |   |   |                                                                         |  |
| chr2 Cufflinks exon45383539 45384346   | . | - | . | gene_id "XLOC_030527"; transcript_id "TCONS_00051170"; exon_number "5"; |  |
| oId "CUFF.50167.2"; tss_id "TSS38525"; |   |   |   |                                                                         |  |
| chr2 Cufflinks exon45346784 45348662   | . | - | . | gene_id "XLOC_030527"; transcript_id "TCONS_00051171"; exon_number "1"; |  |
| oId "CUFF.50167.4"; tss_id "TSS38524"; |   |   |   |                                                                         |  |
| chr2 Cufflinks exon45370342 45370477   | . | - | . | gene_id "XLOC_030527"; transcript_id "TCONS_00051171"; exon_number "2"; |  |
| oId "CUFF.50167.4"; tss_id "TSS38524"; |   |   |   |                                                                         |  |
| chr2 Cufflinks exon45372109 45372764   | . | - | . | gene_id "XLOC_030527"; transcript_id "TCONS_00051171"; exon_number "3"; |  |
| oId "CUFF.50167.4"; tss_id "TSS38524"; |   |   |   |                                                                         |  |
| chr2 Cufflinks exon45346784 45348662   | . | - | . | gene_id "XLOC_030527"; transcript_id "TCONS_00051172"; exon_number "1"; |  |
| oId "CUFF.50167.5"; tss_id "TSS38526"; |   |   |   |                                                                         |  |
| chr2 Cufflinks exon45389223 45389313   | . | - | . | gene_id "XLOC_030527"; transcript_id "TCONS_00051172"; exon_number "2"; |  |
| oId "CUFF.50167.5"; tss_id "TSS38526"; |   |   |   |                                                                         |  |
| chr2 Cufflinks exon45393341 45393394   | . | - | . | gene_id "XLOC_030527"; transcript_id "TCONS_00051172"; exon_number "3"; |  |
| oId "CUFF.50167.5"; tss_id "TSS38526"; |   |   |   |                                                                         |  |
| chr2 Cufflinks exon45395677 45396016   | . | - | . | gene_id "XLOC_030527"; transcript_id "TCONS_00051172"; exon_number "4"; |  |
| oId "CUFF.50167.5"; tss_id "TSS38526"; |   |   |   |                                                                         |  |
| chr2 Cufflinks exon45416260 45416388   | . | - | . | gene_id "XLOC_030527"; transcript_id "TCONS_00051172"; exon_number "5"; |  |
| oId "CUFF.50167.5"; tss_id "TSS38526"; |   |   |   |                                                                         |  |
| chr2 Cufflinks exon45419279 45419424   | . | - | . | gene_id "XLOC_030527"; transcript_id "TCONS_00051172"; exon_number "6"; |  |
| oId "CUFF.50167.5"; tss_id "TSS38526"; |   |   |   |                                                                         |  |
| chr2 Cufflinks exon45490417 45490444   | . | - | . | gene_id "XLOC_030527"; transcript_id "TCONS_00051172"; exon_number "7"; |  |
| oId "CUFF.50167.5"; tss_id "TSS38526"; |   |   |   |                                                                         |  |
| chr2 Cufflinks exon45391951 45392081   | . | - | . | gene_id "XLOC_030527"; transcript_id "TCONS_00051175"; exon_number "1"; |  |
| oId "CUFF.50167.6"; tss_id "TSS38527"; |   |   |   |                                                                         |  |
| chr2 Cufflinks exon45393341 45393394   | . | - | . | gene_id "XLOC_030527"; transcript_id "TCONS_00051175"; exon_number "2"; |  |
| oId "CUFF.50167.6"; tss_id "TSS38527"; |   |   |   |                                                                         |  |
| chr2 Cufflinks exon45395677 45396016   | . | - | . | gene_id "XLOC_030527"; transcript_id "TCONS_00051175"; exon_number "3"; |  |
| oId "CUFF.50167.6"; tss_id "TSS38527"; |   |   |   |                                                                         |  |
| chr2 Cufflinks exon45416260 45416388   | . | - | . | gene_id "XLOC_030527"; transcript_id "TCONS_00051175"; exon_number "4"; |  |
| oId "CUFF.50167.6"; tss_id "TSS38527"; |   |   |   |                                                                         |  |
| chr2 Cufflinks exon45419279 45419424   | . | - | . | gene_id "XLOC_030527"; transcript_id "TCONS_00051175"; exon_number "5"; |  |
| oId "CUFF.50167.6"; tss_id "TSS38527"; |   |   |   |                                                                         |  |
| chr2 Cufflinks exon45450591 45450698   | . | - | . | gene_id "XLOC_030527"; transcript_id "TCONS_00051175"; exon_number "6"; |  |
| oId "CUFF.50167.6"; tss_id "TSS38527"; |   |   |   |                                                                         |  |
| chr2 Cufflinks exon45395636 45396016   | . | - | . | gene_id "XLOC_030527"; transcript_id "TCONS_00051176"; exon_number "1"; |  |
| oId "CUFF.50167.7"; tss_id "TSS38528"; |   |   |   |                                                                         |  |
| chr2 Cufflinks exon45416260 45416388   | . | - | . | gene_id "XLOC_030527"; transcript_id "TCONS_00051176"; exon_number "2"; |  |
| oId "CUFF.50167.7"; tss_id "TSS38528"; |   |   |   |                                                                         |  |
| chr2 Cufflinks exon45419279 45419424   | . | - | . | gene_id "XLOC_030527"; transcript_id "TCONS_00051176"; exon_number "3"; |  |
| oId "CUFF.50167.7"; tss_id "TSS38528"; |   |   |   |                                                                         |  |
| chr2 Cufflinks exon45528123 45528436   | . | - | . | gene_id "XLOC_030527"; transcript_id "TCONS_00051176"; exon_number "4"; |  |
| oId "CUFF.50167.7"; tss_id "TSS38528"; |   |   |   |                                                                         |  |

|                                        |          |   |   |   |                                                                         |
|----------------------------------------|----------|---|---|---|-------------------------------------------------------------------------|
| chr2 Cufflinks exon45401480            | 45401726 | . | - | . | gene_id "XLOC_030527"; transcript_id "TCONS_00051177"; exon_number "1"; |
| oId "CUFF.50167.8"; tss_id "TSS38529"; |          |   |   |   |                                                                         |
| chr2 Cufflinks exon45402254            | 45402352 | . | - | . | gene_id "XLOC_030527"; transcript_id "TCONS_00051177"; exon_number "2"; |
| oId "CUFF.50167.8"; tss_id "TSS38529"; |          |   |   |   |                                                                         |
| chr2 Cufflinks exon45416260            | 45416388 | . | - | . | gene_id "XLOC_030527"; transcript_id "TCONS_00051177"; exon_number "3"; |
| oId "CUFF.50167.8"; tss_id "TSS38529"; |          |   |   |   |                                                                         |
| chr2 Cufflinks exon45418022            | 45418223 | . | - | . | gene_id "XLOC_030527"; transcript_id "TCONS_00051177"; exon_number "4"; |
| oId "CUFF.50167.8"; tss_id "TSS38529"; |          |   |   |   |                                                                         |
| chr2 Cufflinks exon45419279            | 45419424 | . | - | . | gene_id "XLOC_030527"; transcript_id "TCONS_00051177"; exon_number "5"; |
| oId "CUFF.50167.8"; tss_id "TSS38529"; |          |   |   |   |                                                                         |
| chr2 Cufflinks exon45481806            | 45482080 | . | - | . | gene_id "XLOC_030527"; transcript_id "TCONS_00051177"; exon_number "6"; |
| oId "CUFF.50167.8"; tss_id "TSS38529"; |          |   |   |   |                                                                         |
| chr2 Cufflinks exon45401480            | 45401726 | . | - | . | gene_id "XLOC_030527"; transcript_id "TCONS_00051178"; exon_number "1"; |
| oId "CUFF.50167.9"; tss_id "TSS38526"; |          |   |   |   |                                                                         |
| chr2 Cufflinks exon45402254            | 45402352 | . | - | . | gene_id "XLOC_030527"; transcript_id "TCONS_00051178"; exon_number "2"; |
| oId "CUFF.50167.9"; tss_id "TSS38526"; |          |   |   |   |                                                                         |
| chr2 Cufflinks exon45416260            | 45416388 | . | - | . | gene_id "XLOC_030527"; transcript_id "TCONS_00051178"; exon_number "3"; |
| oId "CUFF.50167.9"; tss_id "TSS38526"; |          |   |   |   |                                                                         |
| chr2 Cufflinks exon45419279            | 45419424 | . | - | . | gene_id "XLOC_030527"; transcript_id "TCONS_00051178"; exon_number "4"; |
| oId "CUFF.50167.9"; tss_id "TSS38526"; |          |   |   |   |                                                                         |
| chr2 Cufflinks exon45490257            | 45490369 | . | - | . | gene_id "XLOC_030527"; transcript_id "TCONS_00051178"; exon_number "5"; |
| oId "CUFF.50167.9"; tss_id "TSS38526"; |          |   |   |   |                                                                         |
| chr2 Cufflinks exon55378270            | 55378338 | . | - | . | gene_id "XLOC_030583"; transcript_id "TCONS_00051251"; exon_number "1"; |
| oId "CUFF.50423.1"; tss_id "TSS38591"; |          |   |   |   |                                                                         |
| chr2 Cufflinks exon55396853            | 55397286 | . | - | . | gene_id "XLOC_030583"; transcript_id "TCONS_00051251"; exon_number "2"; |
| oId "CUFF.50423.1"; tss_id "TSS38591"; |          |   |   |   |                                                                         |
| chr2 Cufflinks exon55378270            | 55378338 | . | - | . | gene_id "XLOC_030583"; transcript_id "TCONS_00051252"; exon_number "1"; |
| oId "CUFF.50423.2"; tss_id "TSS38592"; |          |   |   |   |                                                                         |
| chr2 Cufflinks exon55397323            | 55399635 | . | - | . | gene_id "XLOC_030583"; transcript_id "TCONS_00051252"; exon_number "2"; |
| oId "CUFF.50423.2"; tss_id "TSS38592"; |          |   |   |   |                                                                         |
| chr2 Cufflinks exon60217776            | 60218738 | . | - | . | gene_id "XLOC_030676"; transcript_id "TCONS_00051360"; exon_number "1"; |
| oId "CUFF.50623.2"; tss_id "TSS38686"; |          |   |   |   |                                                                         |
| chr2 Cufflinks exon60222710            | 60222794 | . | - | . | gene_id "XLOC_030676"; transcript_id "TCONS_00051360"; exon_number "2"; |
| oId "CUFF.50623.2"; tss_id "TSS38686"; |          |   |   |   |                                                                         |
| chr2 Cufflinks exon60217776            | 60218738 | . | - | . | gene_id "XLOC_030676"; transcript_id "TCONS_00051361"; exon_number "1"; |
| oId "CUFF.50623.1"; tss_id "TSS38687"; |          |   |   |   |                                                                         |
| chr2 Cufflinks exon60222686            | 60222770 | . | - | . | gene_id "XLOC_030676"; transcript_id "TCONS_00051361"; exon_number "2"; |
| oId "CUFF.50623.1"; tss_id "TSS38687"; |          |   |   |   |                                                                         |
| chr2 Cufflinks exon60224872            | 60224911 | . | - | . | gene_id "XLOC_030676"; transcript_id "TCONS_00051361"; exon_number "3"; |
| oId "CUFF.50623.1"; tss_id "TSS38687"; |          |   |   |   |                                                                         |
| chr2 Cufflinks exon60228159            | 60228322 | . | - | . | gene_id "XLOC_030676"; transcript_id "TCONS_00051361"; exon_number "4"; |
| oId "CUFF.50623.1"; tss_id "TSS38687"; |          |   |   |   |                                                                         |
| chr2 Cufflinks exon60327226            | 60327354 | . | - | . | gene_id "XLOC_030676"; transcript_id "TCONS_00051361"; exon_number "5"; |

oId "CUFF.50623.1"; tss\_id "TSS38687";  
chr2 Cufflinks exon60245266 60246903 . - . gene\_id "XLOC\_030676"; transcript\_id "TCONS\_00051365"; exon\_number "1";  
oId "CUFF.50623.3"; tss\_id "TSS38688";  
chr2 Cufflinks exon60251158 60251259 . - . gene\_id "XLOC\_030676"; transcript\_id "TCONS\_00051365"; exon\_number "2";  
oId "CUFF.50623.3"; tss\_id "TSS38688";  
chr2 Cufflinks exon60325355 60326902 . - . gene\_id "XLOC\_030676"; transcript\_id "TCONS\_00051365"; exon\_number "3";  
oId "CUFF.50623.3"; tss\_id "TSS38688";  
chr2 Cufflinks exon62410377 62410707 . - . gene\_id "XLOC\_030709"; transcript\_id "TCONS\_00051416"; exon\_number "1";  
oId "CUFF.50742.1"; tss\_id "TSS38734";  
chr2 Cufflinks exon62414194 62418374 . - . gene\_id "XLOC\_030709"; transcript\_id "TCONS\_00051416"; exon\_number "2";  
oId "CUFF.50742.1"; tss\_id "TSS38734";  
chr2 Cufflinks exon63877796 63877974 . - . gene\_id "XLOC\_030745"; transcript\_id "TCONS\_00051453"; exon\_number "1";  
oId "CUFF.50887.1"; tss\_id "TSS38770";  
chr2 Cufflinks exon64040756 64040841 . - . gene\_id "XLOC\_030745"; transcript\_id "TCONS\_00051453"; exon\_number "2";  
oId "CUFF.50887.1"; tss\_id "TSS38770";  
chr2 Cufflinks exon64067177 64067942 . - . gene\_id "XLOC\_030745"; transcript\_id "TCONS\_00051453"; exon\_number "3";  
oId "CUFF.50887.1"; tss\_id "TSS38770";  
chr2 Cufflinks exon63877796 63877972 . - . gene\_id "XLOC\_030745"; transcript\_id "TCONS\_00051454"; exon\_number "1";  
oId "CUFF.50887.2"; tss\_id "TSS38770";  
chr2 Cufflinks exon63938631 63938725 . - . gene\_id "XLOC\_030745"; transcript\_id "TCONS\_00051454"; exon\_number "2";  
oId "CUFF.50887.2"; tss\_id "TSS38770";  
chr2 Cufflinks exon64067177 64067960 . - . gene\_id "XLOC\_030745"; transcript\_id "TCONS\_00051454"; exon\_number "3";  
oId "CUFF.50887.2"; tss\_id "TSS38770";  
chr2 Cufflinks exon63904683 63905387 . - . gene\_id "XLOC\_030745"; transcript\_id "TCONS\_00051456"; exon\_number "1";  
oId "CUFF.50887.5"; tss\_id "TSS38770";  
chr2 Cufflinks exon63938631 63938725 . - . gene\_id "XLOC\_030745"; transcript\_id "TCONS\_00051456"; exon\_number "2";  
oId "CUFF.50887.5"; tss\_id "TSS38770";  
chr2 Cufflinks exon64040756 64040841 . - . gene\_id "XLOC\_030745"; transcript\_id "TCONS\_00051456"; exon\_number "3";  
oId "CUFF.50887.5"; tss\_id "TSS38770";  
chr2 Cufflinks exon64067177 64067942 . - . gene\_id "XLOC\_030745"; transcript\_id "TCONS\_00051456"; exon\_number "4";  
oId "CUFF.50887.5"; tss\_id "TSS38770";  
chr2 Cufflinks exon63904683 63905387 . - . gene\_id "XLOC\_030745"; transcript\_id "TCONS\_00051455"; exon\_number "1";  
oId "CUFF.50887.3"; tss\_id "TSS38770";  
chr2 Cufflinks exon64040756 64040841 . - . gene\_id "XLOC\_030745"; transcript\_id "TCONS\_00051455"; exon\_number "2";  
oId "CUFF.50887.3"; tss\_id "TSS38770";  
chr2 Cufflinks exon64067177 64067942 . - . gene\_id "XLOC\_030745"; transcript\_id "TCONS\_00051455"; exon\_number "3";  
oId "CUFF.50887.3"; tss\_id "TSS38770";  
chr2 Cufflinks exon63904683 63905387 . - . gene\_id "XLOC\_030745"; transcript\_id "TCONS\_00051457"; exon\_number "1";  
oId "CUFF.50887.4"; tss\_id "TSS38770";  
chr2 Cufflinks exon63938631 63938725 . - . gene\_id "XLOC\_030745"; transcript\_id "TCONS\_00051457"; exon\_number "2";  
oId "CUFF.50887.4"; tss\_id "TSS38770";  
chr2 Cufflinks exon64067177 64067960 . - . gene\_id "XLOC\_030745"; transcript\_id "TCONS\_00051457"; exon\_number "3";  
oId "CUFF.50887.4"; tss\_id "TSS38770";

|                                         |          |   |   |   |                                                                         |
|-----------------------------------------|----------|---|---|---|-------------------------------------------------------------------------|
| chr2 Cufflinks exon64010276             | 64010378 | . | - | . | gene_id "XLOC_030745"; transcript_id "TCONS_00051458"; exon_number "1"; |
| oId "CUFF.50887.6"; tss_id "TSS38770";  |          |   |   |   |                                                                         |
| chr2 Cufflinks exon64040756             | 64040841 | . | - | . | gene_id "XLOC_030745"; transcript_id "TCONS_00051458"; exon_number "2"; |
| oId "CUFF.50887.6"; tss_id "TSS38770";  |          |   |   |   |                                                                         |
| chr2 Cufflinks exon64067177             | 64067942 | . | - | . | gene_id "XLOC_030745"; transcript_id "TCONS_00051458"; exon_number "3"; |
| oId "CUFF.50887.6"; tss_id "TSS38770";  |          |   |   |   |                                                                         |
| chr2 Cufflinks exon65534323             | 65535533 | . | - | . | gene_id "XLOC_030799"; transcript_id "TCONS_00051521"; exon_number "1"; |
| oId "CUFF.51029.1"; tss_id "TSS38828";  |          |   |   |   |                                                                         |
| chr2 Cufflinks exon65535630             | 65535657 | . | - | . | gene_id "XLOC_030799"; transcript_id "TCONS_00051521"; exon_number "2"; |
| oId "CUFF.51029.1"; tss_id "TSS38828";  |          |   |   |   |                                                                         |
| chr2 Cufflinks exon69099241             | 69102154 | . | - | . | gene_id "XLOC_030830"; transcript_id "TCONS_00051570"; exon_number "1"; |
| oId "CUFF.51144.7"; tss_id "TSS38864";  |          |   |   |   |                                                                         |
| chr2 Cufflinks exon69105191             | 69105352 | . | - | . | gene_id "XLOC_030830"; transcript_id "TCONS_00051570"; exon_number "2"; |
| oId "CUFF.51144.7"; tss_id "TSS38864";  |          |   |   |   |                                                                         |
| chr2 Cufflinks exon69108574             | 69108593 | . | - | . | gene_id "XLOC_030830"; transcript_id "TCONS_00051570"; exon_number "3"; |
| oId "CUFF.51144.7"; tss_id "TSS38864";  |          |   |   |   |                                                                         |
| chr2 Cufflinks exon69133308             | 69135499 | . | - | . | gene_id "XLOC_030830"; transcript_id "TCONS_00051574"; exon_number "1"; |
| oId "CUFF.51144.9"; tss_id "TSS38865";  |          |   |   |   |                                                                         |
| chr2 Cufflinks exon69138493             | 69138718 | . | - | . | gene_id "XLOC_030830"; transcript_id "TCONS_00051574"; exon_number "2"; |
| oId "CUFF.51144.9"; tss_id "TSS38865";  |          |   |   |   |                                                                         |
| chr2 Cufflinks exon69138872             | 69139169 | . | - | . | gene_id "XLOC_030830"; transcript_id "TCONS_00051574"; exon_number "3"; |
| oId "CUFF.51144.9"; tss_id "TSS38865";  |          |   |   |   |                                                                         |
| chr2 Cufflinks exon69133308             | 69135499 | . | - | . | gene_id "XLOC_030830"; transcript_id "TCONS_00051575"; exon_number "1"; |
| oId "CUFF.51144.10"; tss_id "TSS38867"; |          |   |   |   |                                                                         |
| chr2 Cufflinks exon69138493             | 69138718 | . | - | . | gene_id "XLOC_030830"; transcript_id "TCONS_00051575"; exon_number "2"; |
| oId "CUFF.51144.10"; tss_id "TSS38867"; |          |   |   |   |                                                                         |
| chr2 Cufflinks exon69139485             | 69140001 | . | - | . | gene_id "XLOC_030830"; transcript_id "TCONS_00051575"; exon_number "3"; |
| oId "CUFF.51144.10"; tss_id "TSS38867"; |          |   |   |   |                                                                         |
| chr2 Cufflinks exon70348457             | 70351557 | . | - | . | gene_id "XLOC_030854"; transcript_id "TCONS_00051609"; exon_number "1"; |
| oId "CUFF.51227.1"; tss_id "TSS38901";  |          |   |   |   |                                                                         |
| chr2 Cufflinks exon70352178             | 70352520 | . | - | . | gene_id "XLOC_030854"; transcript_id "TCONS_00051609"; exon_number "2"; |
| oId "CUFF.51227.1"; tss_id "TSS38901";  |          |   |   |   |                                                                         |
| chr2 Cufflinks exon71159904             | 71169564 | . | - | . | gene_id "XLOC_030870"; transcript_id "TCONS_00051639"; exon_number "1"; |
| oId "CUFF.51266.2"; tss_id "TSS38924";  |          |   |   |   |                                                                         |
| chr2 Cufflinks exon71174665             | 71175337 | . | - | . | gene_id "XLOC_030870"; transcript_id "TCONS_00051639"; exon_number "2"; |
| oId "CUFF.51266.2"; tss_id "TSS38924";  |          |   |   |   |                                                                         |
| chr2 Cufflinks exon71159904             | 71169563 | . | - | . | gene_id "XLOC_030870"; transcript_id "TCONS_00051640"; exon_number "1"; |
| oId "CUFF.51266.3"; tss_id "TSS38925";  |          |   |   |   |                                                                         |
| chr2 Cufflinks exon71175357             | 71175748 | . | - | . | gene_id "XLOC_030870"; transcript_id "TCONS_00051640"; exon_number "2"; |
| oId "CUFF.51266.3"; tss_id "TSS38925";  |          |   |   |   |                                                                         |
| chr2 Cufflinks exon71159904             | 71163246 | . | - | . | gene_id "XLOC_030870"; transcript_id "TCONS_00051641"; exon_number "1"; |
| oId "CUFF.51266.1"; tss_id "TSS38925";  |          |   |   |   |                                                                         |
| chr2 Cufflinks exon71163322             | 71169563 | . | - | . | gene_id "XLOC_030870"; transcript_id "TCONS_00051641"; exon_number "2"; |

|                                                                                |   |   |   |                                                                         |
|--------------------------------------------------------------------------------|---|---|---|-------------------------------------------------------------------------|
| oId "CUFF.51266.1"; tss_id "TSS38925";<br>chr2 Cufflinks exon71174664 71174801 | . | - | . | gene_id "XLOC_030870"; transcript_id "TCONS_00051641"; exon_number "3"; |
| oId "CUFF.51266.1"; tss_id "TSS38925";<br>chr2 Cufflinks exon71175357 71175752 | . | - | . | gene_id "XLOC_030870"; transcript_id "TCONS_00051641"; exon_number "4"; |
| oId "CUFF.51266.1"; tss_id "TSS38925";<br>chr2 Cufflinks exon74379724 74381122 | . | - | . | gene_id "XLOC_030905"; transcript_id "TCONS_00051708"; exon_number "1"; |
| oId "CUFF.51403.1"; tss_id "TSS38977";<br>chr2 Cufflinks exon74632215 74632240 | . | - | . | gene_id "XLOC_030905"; transcript_id "TCONS_00051708"; exon_number "2"; |
| oId "CUFF.51403.1"; tss_id "TSS38977";<br>chr2 Cufflinks exon85536530 85542818 | . | - | . | gene_id "XLOC_030964"; transcript_id "TCONS_00051784"; exon_number "1"; |
| oId "CUFF.51690.3"; tss_id "TSS39042";<br>chr2 Cufflinks exon85543543 85543589 | . | - | . | gene_id "XLOC_030964"; transcript_id "TCONS_00051784"; exon_number "2"; |
| oId "CUFF.51690.3"; tss_id "TSS39042";<br>chr2 Cufflinks exon85904867 85905009 | . | - | . | gene_id "XLOC_030983"; transcript_id "TCONS_00051813"; exon_number "1"; |
| oId "CUFF.51745.2"; tss_id "TSS39065";<br>chr2 Cufflinks exon85905524 85906098 | . | - | . | gene_id "XLOC_030983"; transcript_id "TCONS_00051813"; exon_number "2"; |
| oId "CUFF.51745.2"; tss_id "TSS39065";<br>chr2 Cufflinks exon85924593 85925374 | . | - | . | gene_id "XLOC_030983"; transcript_id "TCONS_00051813"; exon_number "3"; |
| oId "CUFF.51745.2"; tss_id "TSS39065";<br>chr2 Cufflinks exon85904867 85905009 | . | - | . | gene_id "XLOC_030983"; transcript_id "TCONS_00051814"; exon_number "1"; |
| oId "CUFF.51745.1"; tss_id "TSS39066";<br>chr2 Cufflinks exon85905524 85906098 | . | - | . | gene_id "XLOC_030983"; transcript_id "TCONS_00051814"; exon_number "2"; |
| oId "CUFF.51745.1"; tss_id "TSS39066";<br>chr2 Cufflinks exon85924593 85924690 | . | - | . | gene_id "XLOC_030983"; transcript_id "TCONS_00051814"; exon_number "3"; |
| oId "CUFF.51745.1"; tss_id "TSS39066";<br>chr2 Cufflinks exon85925708 85925765 | . | - | . | gene_id "XLOC_030983"; transcript_id "TCONS_00051814"; exon_number "4"; |
| oId "CUFF.51745.1"; tss_id "TSS39066";<br>chr2 Cufflinks exon85905303 85906098 | . | - | . | gene_id "XLOC_030983"; transcript_id "TCONS_00051815"; exon_number "1"; |
| oId "CUFF.51745.3"; tss_id "TSS39065";<br>chr2 Cufflinks exon85924593 85925374 | . | - | . | gene_id "XLOC_030983"; transcript_id "TCONS_00051815"; exon_number "2"; |
| oId "CUFF.51745.3"; tss_id "TSS39065";<br>chr2 Cufflinks exon85914622 85915032 | . | - | . | gene_id "XLOC_030983"; transcript_id "TCONS_00051816"; exon_number "1"; |
| oId "CUFF.51745.4"; tss_id "TSS39065";<br>chr2 Cufflinks exon85924593 85925374 | . | - | . | gene_id "XLOC_030983"; transcript_id "TCONS_00051816"; exon_number "2"; |
| oId "CUFF.51745.4"; tss_id "TSS39065";<br>chr2 Cufflinks exon95674777 95680990 | . | - | . | gene_id "XLOC_031052"; transcript_id "TCONS_00051944"; exon_number "1"; |
| oId "CUFF.52023.1"; tss_id "TSS39165";<br>chr2 Cufflinks exon95682822 95688748 | . | - | . | gene_id "XLOC_031052"; transcript_id "TCONS_00051944"; exon_number "2"; |
| oId "CUFF.52023.1"; tss_id "TSS39165";<br>chr2 Cufflinks exon97477865 97478226 | . | - | . | gene_id "XLOC_031095"; transcript_id "TCONS_00052008"; exon_number "1"; |
| oId "CUFF.52164.1"; tss_id "TSS39220";<br>chr2 Cufflinks exon97479231 97480049 | . | - | . | gene_id "XLOC_031095"; transcript_id "TCONS_00052008"; exon_number "2"; |
| oId "CUFF.52164.1"; tss_id "TSS39220";                                         |   |   |   |                                                                         |

|                                        |           |   |   |   |                                                                         |
|----------------------------------------|-----------|---|---|---|-------------------------------------------------------------------------|
| chr2 Cufflinks exon99377526            | 99379041  | . | - | . | gene_id "XLOC_031115"; transcript_id "TCONS_00052060"; exon_number "1"; |
| oId "CUFF.52284.1"; tss_id "TSS39253"; |           |   |   |   |                                                                         |
| chr2 Cufflinks exon99385074            | 99385249  | . | - | . | gene_id "XLOC_031115"; transcript_id "TCONS_00052060"; exon_number "2"; |
| oId "CUFF.52284.1"; tss_id "TSS39253"; |           |   |   |   |                                                                         |
| chr2 Cufflinks exon99385365            | 99385509  | . | - | . | gene_id "XLOC_031115"; transcript_id "TCONS_00052060"; exon_number "3"; |
| oId "CUFF.52284.1"; tss_id "TSS39253"; |           |   |   |   |                                                                         |
| chr2 Cufflinks exon99388082            | 99388371  | . | - | . | gene_id "XLOC_031115"; transcript_id "TCONS_00052060"; exon_number "4"; |
| oId "CUFF.52284.1"; tss_id "TSS39253"; |           |   |   |   |                                                                         |
| chr2 Cufflinks exon99388482            | 99388605  | . | - | . | gene_id "XLOC_031115"; transcript_id "TCONS_00052060"; exon_number "5"; |
| oId "CUFF.52284.1"; tss_id "TSS39253"; |           |   |   |   |                                                                         |
| chr2 Cufflinks exon99389275            | 99389416  | . | - | . | gene_id "XLOC_031115"; transcript_id "TCONS_00052060"; exon_number "6"; |
| oId "CUFF.52284.1"; tss_id "TSS39253"; |           |   |   |   |                                                                         |
| chr2 Cufflinks exon99377526            | 99379041  | . | - | . | gene_id "XLOC_031115"; transcript_id "TCONS_00052061"; exon_number "1"; |
| oId "CUFF.52284.2"; tss_id "TSS39254"; |           |   |   |   |                                                                         |
| chr2 Cufflinks exon99385074            | 99385249  | . | - | . | gene_id "XLOC_031115"; transcript_id "TCONS_00052061"; exon_number "2"; |
| oId "CUFF.52284.2"; tss_id "TSS39254"; |           |   |   |   |                                                                         |
| chr2 Cufflinks exon99385365            | 99385509  | . | - | . | gene_id "XLOC_031115"; transcript_id "TCONS_00052061"; exon_number "3"; |
| oId "CUFF.52284.2"; tss_id "TSS39254"; |           |   |   |   |                                                                         |
| chr2 Cufflinks exon99388082            | 99388363  | . | - | . | gene_id "XLOC_031115"; transcript_id "TCONS_00052061"; exon_number "4"; |
| oId "CUFF.52284.2"; tss_id "TSS39254"; |           |   |   |   |                                                                         |
| chr2 Cufflinks exon99388452            | 99388605  | . | - | . | gene_id "XLOC_031115"; transcript_id "TCONS_00052061"; exon_number "5"; |
| oId "CUFF.52284.2"; tss_id "TSS39254"; |           |   |   |   |                                                                         |
| chr2 Cufflinks exon99390475            | 99390489  | . | - | . | gene_id "XLOC_031115"; transcript_id "TCONS_00052061"; exon_number "6"; |
| oId "CUFF.52284.2"; tss_id "TSS39254"; |           |   |   |   |                                                                         |
| chr2 Cufflinks exon105485684           | 105486408 | . | - | . | gene_id "XLOC_031172"; transcript_id "TCONS_00052172"; exon_number "1"; |
| oId "CUFF.52504.3"; tss_id "TSS39334"; |           |   |   |   |                                                                         |
| chr2 Cufflinks exon105489172           | 105489389 | . | - | . | gene_id "XLOC_031172"; transcript_id "TCONS_00052172"; exon_number "2"; |
| oId "CUFF.52504.3"; tss_id "TSS39334"; |           |   |   |   |                                                                         |
| chr2 Cufflinks exon105489553           | 105490031 | . | - | . | gene_id "XLOC_031172"; transcript_id "TCONS_00052172"; exon_number "3"; |
| oId "CUFF.52504.3"; tss_id "TSS39334"; |           |   |   |   |                                                                         |
| chr2 Cufflinks exon105485684           | 105486408 | . | - | . | gene_id "XLOC_031172"; transcript_id "TCONS_00052173"; exon_number "1"; |
| oId "CUFF.52504.4"; tss_id "TSS39335"; |           |   |   |   |                                                                         |
| chr2 Cufflinks exon105490777           | 105491029 | . | - | . | gene_id "XLOC_031172"; transcript_id "TCONS_00052173"; exon_number "2"; |
| oId "CUFF.52504.4"; tss_id "TSS39335"; |           |   |   |   |                                                                         |
| chr2 Cufflinks exon110969106           | 110969199 | . | - | . | gene_id "XLOC_031206"; transcript_id "TCONS_00052232"; exon_number "1"; |
| oId "CUFF.52646.1"; tss_id "TSS39377"; |           |   |   |   |                                                                         |
| chr2 Cufflinks exon110969792           | 110969869 | . | - | . | gene_id "XLOC_031206"; transcript_id "TCONS_00052232"; exon_number "2"; |
| oId "CUFF.52646.1"; tss_id "TSS39377"; |           |   |   |   |                                                                         |
| chr2 Cufflinks exon110969906           | 110970452 | . | - | . | gene_id "XLOC_031206"; transcript_id "TCONS_00052232"; exon_number "3"; |
| oId "CUFF.52646.1"; tss_id "TSS39377"; |           |   |   |   |                                                                         |
| chr2 Cufflinks exon110972363           | 110972534 | . | - | . | gene_id "XLOC_031206"; transcript_id "TCONS_00052232"; exon_number "4"; |
| oId "CUFF.52646.1"; tss_id "TSS39377"; |           |   |   |   |                                                                         |
| chr2 Cufflinks exon110973254           | 110973384 | . | - | . | gene_id "XLOC_031206"; transcript_id "TCONS_00052232"; exon_number "5"; |

oId "CUFF.52646.1"; tss\_id "TSS39377";  
chr2 Cufflinks exon110974241 110974340 . - . gene\_id "XLOC\_031206"; transcript\_id "TCONS\_00052232"; exon\_number "6";  
oId "CUFF.52646.1"; tss\_id "TSS39377";  
chr2 Cufflinks exon110975236 110975365 . - . gene\_id "XLOC\_031206"; transcript\_id "TCONS\_00052232"; exon\_number "7";  
oId "CUFF.52646.1"; tss\_id "TSS39377";  
chr2 Cufflinks exon110977228 110977354 . - . gene\_id "XLOC\_031206"; transcript\_id "TCONS\_00052232"; exon\_number "8";  
oId "CUFF.52646.1"; tss\_id "TSS39377";  
chr2 Cufflinks exon110980314 110980517 . - . gene\_id "XLOC\_031206"; transcript\_id "TCONS\_00052232"; exon\_number "9";  
oId "CUFF.52646.1"; tss\_id "TSS39377";  
chr2 Cufflinks exon111953455 111956566 . - . gene\_id "XLOC\_031218"; transcript\_id "TCONS\_00052250"; exon\_number "1";  
oId "CUFF.52673.1"; tss\_id "TSS39391";  
chr2 Cufflinks exon111965297 111966238 . - . gene\_id "XLOC\_031218"; transcript\_id "TCONS\_00052250"; exon\_number "2";  
oId "CUFF.52673.1"; tss\_id "TSS39391";  
chr2 Cufflinks exon112101638 112101814 . - . gene\_id "XLOC\_031218"; transcript\_id "TCONS\_00052250"; exon\_number "3";  
oId "CUFF.52673.1"; tss\_id "TSS39391";  
chr2 Cufflinks exon112123138 112125152 . - . gene\_id "XLOC\_031218"; transcript\_id "TCONS\_00052250"; exon\_number "4";  
oId "CUFF.52673.1"; tss\_id "TSS39391";  
chr2 Cufflinks exon112252462 112252692 . - . gene\_id "XLOC\_031218"; transcript\_id "TCONS\_00052250"; exon\_number "5";  
oId "CUFF.52673.1"; tss\_id "TSS39391";  
chr2 Cufflinks exon111957816 111966238 . - . gene\_id "XLOC\_031218"; transcript\_id "TCONS\_00052252"; exon\_number "1";  
oId "CUFF.52673.2"; tss\_id "TSS39392";  
chr2 Cufflinks exon112101638 112101814 . - . gene\_id "XLOC\_031218"; transcript\_id "TCONS\_00052252"; exon\_number "2";  
oId "CUFF.52673.2"; tss\_id "TSS39392";  
chr2 Cufflinks exon112123138 112125152 . - . gene\_id "XLOC\_031218"; transcript\_id "TCONS\_00052252"; exon\_number "3";  
oId "CUFF.52673.2"; tss\_id "TSS39392";  
chr2 Cufflinks exon112252462 112252806 . - . gene\_id "XLOC\_031218"; transcript\_id "TCONS\_00052252"; exon\_number "4";  
oId "CUFF.52673.2"; tss\_id "TSS39392";  
chr2 Cufflinks exon111990734 111991316 . - . gene\_id "XLOC\_031218"; transcript\_id "TCONS\_00052259"; exon\_number "1";  
oId "CUFF.52673.7"; tss\_id "TSS39391";  
chr2 Cufflinks exon112005725 112005818 . - . gene\_id "XLOC\_031218"; transcript\_id "TCONS\_00052259"; exon\_number "2";  
oId "CUFF.52673.7"; tss\_id "TSS39391";  
chr2 Cufflinks exon112101638 112101814 . - . gene\_id "XLOC\_031218"; transcript\_id "TCONS\_00052259"; exon\_number "3";  
oId "CUFF.52673.7"; tss\_id "TSS39391";  
chr2 Cufflinks exon112123138 112125152 . - . gene\_id "XLOC\_031218"; transcript\_id "TCONS\_00052259"; exon\_number "4";  
oId "CUFF.52673.7"; tss\_id "TSS39391";  
chr2 Cufflinks exon112252462 112252692 . - . gene\_id "XLOC\_031218"; transcript\_id "TCONS\_00052259"; exon\_number "5";  
oId "CUFF.52673.7"; tss\_id "TSS39391";  
chr2 Cufflinks exon111994549 111996262 . - . gene\_id "XLOC\_031218"; transcript\_id "TCONS\_00052261"; exon\_number "1";  
oId "CUFF.52673.9"; tss\_id "TSS39393";  
chr2 Cufflinks exon111997379 111997573 . - . gene\_id "XLOC\_031218"; transcript\_id "TCONS\_00052261"; exon\_number "2";  
oId "CUFF.52673.9"; tss\_id "TSS39393";  
chr2 Cufflinks exon111998181 111998350 . - . gene\_id "XLOC\_031218"; transcript\_id "TCONS\_00052261"; exon\_number "3";  
oId "CUFF.52673.9"; tss\_id "TSS39393";



|                                         |           |   |   |   |                                                                         |
|-----------------------------------------|-----------|---|---|---|-------------------------------------------------------------------------|
| chr2 Cufflinks exon111994549            | 111996630 | . | - | . | gene_id "XLOC_031218"; transcript_id "TCONS_00052260"; exon_number "1"; |
| oId "CUFF.52673.10"; tss_id "TSS39393"; |           |   |   |   |                                                                         |
| chr2 Cufflinks exon111997379            | 111997573 | . | - | . | gene_id "XLOC_031218"; transcript_id "TCONS_00052260"; exon_number "2"; |
| oId "CUFF.52673.10"; tss_id "TSS39393"; |           |   |   |   |                                                                         |
| chr2 Cufflinks exon111998181            | 111998350 | . | - | . | gene_id "XLOC_031218"; transcript_id "TCONS_00052260"; exon_number "3"; |
| oId "CUFF.52673.10"; tss_id "TSS39393"; |           |   |   |   |                                                                         |
| chr2 Cufflinks exon111994549            | 111996630 | . | - | . | gene_id "XLOC_031218"; transcript_id "TCONS_00052262"; exon_number "1"; |
| oId "CUFF.52673.8"; tss_id "TSS39394";  |           |   |   |   |                                                                         |
| chr2 Cufflinks exon111997379            | 111997573 | . | - | . | gene_id "XLOC_031218"; transcript_id "TCONS_00052262"; exon_number "2"; |
| oId "CUFF.52673.8"; tss_id "TSS39394";  |           |   |   |   |                                                                         |
| chr2 Cufflinks exon112003387            | 112005710 | . | - | . | gene_id "XLOC_031218"; transcript_id "TCONS_00052262"; exon_number "3"; |
| oId "CUFF.52673.8"; tss_id "TSS39394";  |           |   |   |   |                                                                         |
| chr2 Cufflinks exon111997506            | 111997573 | . | - | . | gene_id "XLOC_031218"; transcript_id "TCONS_00052264"; exon_number "1"; |
| oId "CUFF.52673.11"; tss_id "TSS39391"; |           |   |   |   |                                                                         |
| chr2 Cufflinks exon112005725            | 112005818 | . | - | . | gene_id "XLOC_031218"; transcript_id "TCONS_00052264"; exon_number "2"; |
| oId "CUFF.52673.11"; tss_id "TSS39391"; |           |   |   |   |                                                                         |
| chr2 Cufflinks exon112101638            | 112101814 | . | - | . | gene_id "XLOC_031218"; transcript_id "TCONS_00052264"; exon_number "3"; |
| oId "CUFF.52673.11"; tss_id "TSS39391"; |           |   |   |   |                                                                         |
| chr2 Cufflinks exon112123138            | 112125152 | . | - | . | gene_id "XLOC_031218"; transcript_id "TCONS_00052264"; exon_number "4"; |
| oId "CUFF.52673.11"; tss_id "TSS39391"; |           |   |   |   |                                                                         |
| chr2 Cufflinks exon112252462            | 112252543 | . | - | . | gene_id "XLOC_031218"; transcript_id "TCONS_00052264"; exon_number "5"; |
| oId "CUFF.52673.11"; tss_id "TSS39391"; |           |   |   |   |                                                                         |
| chr2 Cufflinks exon112252654            | 112252692 | . | - | . | gene_id "XLOC_031218"; transcript_id "TCONS_00052264"; exon_number "6"; |
| oId "CUFF.52673.11"; tss_id "TSS39391"; |           |   |   |   |                                                                         |
| chr2 Cufflinks exon112186886            | 112187197 | . | - | . | gene_id "XLOC_031218"; transcript_id "TCONS_00052280"; exon_number "1"; |
| oId "CUFF.52673.13"; tss_id "TSS39391"; |           |   |   |   |                                                                         |
| chr2 Cufflinks exon112252462            | 112252692 | . | - | . | gene_id "XLOC_031218"; transcript_id "TCONS_00052280"; exon_number "2"; |
| oId "CUFF.52673.13"; tss_id "TSS39391"; |           |   |   |   |                                                                         |
| chr2 Cufflinks exon112367867            | 112369622 | . | - | . | gene_id "XLOC_031260"; transcript_id "TCONS_00052299"; exon_number "1"; |
| oId "CUFF.52728.2"; tss_id "TSS39436";  |           |   |   |   |                                                                         |
| chr2 Cufflinks exon112372120            | 112372188 | . | - | . | gene_id "XLOC_031260"; transcript_id "TCONS_00052299"; exon_number "2"; |
| oId "CUFF.52728.2"; tss_id "TSS39436";  |           |   |   |   |                                                                         |
| chr2 Cufflinks exon112373235            | 112377462 | . | - | . | gene_id "XLOC_031260"; transcript_id "TCONS_00052299"; exon_number "3"; |
| oId "CUFF.52728.2"; tss_id "TSS39436";  |           |   |   |   |                                                                         |
| chr2 Cufflinks exon112373854            | 112376570 | . | - | . | gene_id "XLOC_031260"; transcript_id "TCONS_00052300"; exon_number "1"; |
| oId "CUFF.52728.3"; tss_id "TSS39437";  |           |   |   |   |                                                                         |
| chr2 Cufflinks exon112376828            | 112377099 | . | - | . | gene_id "XLOC_031260"; transcript_id "TCONS_00052300"; exon_number "2"; |
| oId "CUFF.52728.3"; tss_id "TSS39437";  |           |   |   |   |                                                                         |
| chr2 Cufflinks exon113399405            | 113399559 | . | - | . | gene_id "XLOC_031292"; transcript_id "TCONS_00052346"; exon_number "1"; |
| oId "CUFF.52831.1"; tss_id "TSS39478";  |           |   |   |   |                                                                         |
| chr2 Cufflinks exon113399660            | 113399766 | . | - | . | gene_id "XLOC_031292"; transcript_id "TCONS_00052346"; exon_number "2"; |
| oId "CUFF.52831.1"; tss_id "TSS39478";  |           |   |   |   |                                                                         |
| chr2 Cufflinks exon113400756            | 113400870 | . | - | . | gene_id "XLOC_031292"; transcript_id "TCONS_00052346"; exon_number "3"; |

oId "CUFF.52831.1"; tss\_id "TSS39478";  
chr2 Cufflinks exon113401536 113401592 . - . gene\_id "XLOC\_031292"; transcript\_id "TCONS\_00052346"; exon\_number "4";  
oId "CUFF.52831.1"; tss\_id "TSS39478";  
chr2 Cufflinks exon113401676 113402550 . - . gene\_id "XLOC\_031292"; transcript\_id "TCONS\_00052346"; exon\_number "5";  
oId "CUFF.52831.1"; tss\_id "TSS39478";  
chr2 Cufflinks exon114356571 114358403 . - . gene\_id "XLOC\_031307"; transcript\_id "TCONS\_00052368"; exon\_number "1";  
oId "CUFF.52902.2"; tss\_id "TSS39495";  
chr2 Cufflinks exon114358789 114359006 . - . gene\_id "XLOC\_031307"; transcript\_id "TCONS\_00052368"; exon\_number "2";  
oId "CUFF.52902.2"; tss\_id "TSS39495";  
chr2 Cufflinks exon114359172 114359189 . - . gene\_id "XLOC\_031307"; transcript\_id "TCONS\_00052368"; exon\_number "3";  
oId "CUFF.52902.2"; tss\_id "TSS39495";  
chr2 Cufflinks exon114356571 114358421 . - . gene\_id "XLOC\_031307"; transcript\_id "TCONS\_00052370"; exon\_number "1";  
oId "CUFF.52902.3"; tss\_id "TSS39496";  
chr2 Cufflinks exon114358789 114359006 . - . gene\_id "XLOC\_031307"; transcript\_id "TCONS\_00052370"; exon\_number "2";  
oId "CUFF.52902.3"; tss\_id "TSS39496";  
chr2 Cufflinks exon114361172 114361294 . - . gene\_id "XLOC\_031307"; transcript\_id "TCONS\_00052370"; exon\_number "3";  
oId "CUFF.52902.3"; tss\_id "TSS39496";  
chr2 Cufflinks exon114356571 114359006 . - . gene\_id "XLOC\_031307"; transcript\_id "TCONS\_00052369"; exon\_number "1";  
oId "CUFF.52902.1"; tss\_id "TSS39496";  
chr2 Cufflinks exon114361172 114361294 . - . gene\_id "XLOC\_031307"; transcript\_id "TCONS\_00052369"; exon\_number "2";  
oId "CUFF.52902.1"; tss\_id "TSS39496";  
chr2 Cufflinks exon114356571 114358403 . - . gene\_id "XLOC\_031307"; transcript\_id "TCONS\_00052371"; exon\_number "1";  
oId "CUFF.52902.4"; tss\_id "TSS39496";  
chr2 Cufflinks exon114358789 114359006 . - . gene\_id "XLOC\_031307"; transcript\_id "TCONS\_00052371"; exon\_number "2";  
oId "CUFF.52902.4"; tss\_id "TSS39496";  
chr2 Cufflinks exon114361172 114361325 . - . gene\_id "XLOC\_031307"; transcript\_id "TCONS\_00052371"; exon\_number "3";  
oId "CUFF.52902.4"; tss\_id "TSS39496";  
chr2 Cufflinks exon114564672 114564752 . - . gene\_id "XLOC\_031310"; transcript\_id "TCONS\_00052377"; exon\_number "1";  
oId "CUFF.52925.1"; tss\_id "TSS39501";  
chr2 Cufflinks exon114588429 114589005 . - . gene\_id "XLOC\_031310"; transcript\_id "TCONS\_00052377"; exon\_number "2";  
oId "CUFF.52925.1"; tss\_id "TSS39501";  
chr2 Cufflinks exon114589107 114589162 . - . gene\_id "XLOC\_031310"; transcript\_id "TCONS\_00052377"; exon\_number "3";  
oId "CUFF.52925.1"; tss\_id "TSS39501";  
chr2 Cufflinks exon114600841 114600930 . - . gene\_id "XLOC\_031310"; transcript\_id "TCONS\_00052377"; exon\_number "4";  
oId "CUFF.52925.1"; tss\_id "TSS39501";  
chr2 Cufflinks exon114619041 114619138 . - . gene\_id "XLOC\_031310"; transcript\_id "TCONS\_00052377"; exon\_number "5";  
oId "CUFF.52925.1"; tss\_id "TSS39501";  
chr2 Cufflinks exon114648470 114648589 . - . gene\_id "XLOC\_031310"; transcript\_id "TCONS\_00052377"; exon\_number "6";  
oId "CUFF.52925.1"; tss\_id "TSS39501";  
chr2 Cufflinks exon114576663 114577172 . - . gene\_id "XLOC\_031310"; transcript\_id "TCONS\_00052378"; exon\_number "1";  
oId "CUFF.52925.2"; tss\_id "TSS39501";  
chr2 Cufflinks exon114581390 114581577 . - . gene\_id "XLOC\_031310"; transcript\_id "TCONS\_00052378"; exon\_number "2";  
oId "CUFF.52925.2"; tss\_id "TSS39501";

|                                        |           |   |   |   |                                                                         |
|----------------------------------------|-----------|---|---|---|-------------------------------------------------------------------------|
| chr2 Cufflinks exon114588429           | 114589005 | . | - | . | gene_id "XLOC_031310"; transcript_id "TCONS_00052378"; exon_number "3"; |
| oId "CUFF.52925.2"; tss_id "TSS39501"; |           |   |   |   |                                                                         |
| chr2 Cufflinks exon114589107           | 114589162 | . | - | . | gene_id "XLOC_031310"; transcript_id "TCONS_00052378"; exon_number "4"; |
| oId "CUFF.52925.2"; tss_id "TSS39501"; |           |   |   |   |                                                                         |
| chr2 Cufflinks exon114600841           | 114600930 | . | - | . | gene_id "XLOC_031310"; transcript_id "TCONS_00052378"; exon_number "5"; |
| oId "CUFF.52925.2"; tss_id "TSS39501"; |           |   |   |   |                                                                         |
| chr2 Cufflinks exon114619041           | 114619138 | . | - | . | gene_id "XLOC_031310"; transcript_id "TCONS_00052378"; exon_number "6"; |
| oId "CUFF.52925.2"; tss_id "TSS39501"; |           |   |   |   |                                                                         |
| chr2 Cufflinks exon114648470           | 114648587 | . | - | . | gene_id "XLOC_031310"; transcript_id "TCONS_00052378"; exon_number "7"; |
| oId "CUFF.52925.2"; tss_id "TSS39501"; |           |   |   |   |                                                                         |
| chr2 Cufflinks exon114586610           | 114589005 | . | - | . | gene_id "XLOC_031310"; transcript_id "TCONS_00052381"; exon_number "1"; |
| oId "CUFF.52925.3"; tss_id "TSS39501"; |           |   |   |   |                                                                         |
| chr2 Cufflinks exon114589107           | 114589162 | . | - | . | gene_id "XLOC_031310"; transcript_id "TCONS_00052381"; exon_number "2"; |
| oId "CUFF.52925.3"; tss_id "TSS39501"; |           |   |   |   |                                                                         |
| chr2 Cufflinks exon114600841           | 114600930 | . | - | . | gene_id "XLOC_031310"; transcript_id "TCONS_00052381"; exon_number "3"; |
| oId "CUFF.52925.3"; tss_id "TSS39501"; |           |   |   |   |                                                                         |
| chr2 Cufflinks exon114619041           | 114619138 | . | - | . | gene_id "XLOC_031310"; transcript_id "TCONS_00052381"; exon_number "4"; |
| oId "CUFF.52925.3"; tss_id "TSS39501"; |           |   |   |   |                                                                         |
| chr2 Cufflinks exon114648470           | 114648589 | . | - | . | gene_id "XLOC_031310"; transcript_id "TCONS_00052381"; exon_number "5"; |
| oId "CUFF.52925.3"; tss_id "TSS39501"; |           |   |   |   |                                                                         |
| chr2 Cufflinks exon114643880           | 114645745 | . | - | . | gene_id "XLOC_031310"; transcript_id "TCONS_00052384"; exon_number "1"; |
| oId "CUFF.52925.9"; tss_id "TSS39501"; |           |   |   |   |                                                                         |
| chr2 Cufflinks exon114647121           | 114647271 | . | - | . | gene_id "XLOC_031310"; transcript_id "TCONS_00052384"; exon_number "2"; |
| oId "CUFF.52925.9"; tss_id "TSS39501"; |           |   |   |   |                                                                         |
| chr2 Cufflinks exon114648470           | 114648587 | . | - | . | gene_id "XLOC_031310"; transcript_id "TCONS_00052384"; exon_number "3"; |
| oId "CUFF.52925.9"; tss_id "TSS39501"; |           |   |   |   |                                                                         |
| chr2 Cufflinks exon114643880           | 114647271 | . | - | . | gene_id "XLOC_031310"; transcript_id "TCONS_00052383"; exon_number "1"; |
| oId "CUFF.52925.8"; tss_id "TSS39501"; |           |   |   |   |                                                                         |
| chr2 Cufflinks exon114648470           | 114648587 | . | - | . | gene_id "XLOC_031310"; transcript_id "TCONS_00052383"; exon_number "2"; |
| oId "CUFF.52925.8"; tss_id "TSS39501"; |           |   |   |   |                                                                         |
| chr2 Cufflinks exon118940408           | 118940898 | . | - | . | gene_id "XLOC_031334"; transcript_id "TCONS_00052409"; exon_number "1"; |
| oId "CUFF.53005.2"; tss_id "TSS39528"; |           |   |   |   |                                                                         |
| chr2 Cufflinks exon118942914           | 118943438 | . | - | . | gene_id "XLOC_031334"; transcript_id "TCONS_00052409"; exon_number "2"; |
| oId "CUFF.53005.2"; tss_id "TSS39528"; |           |   |   |   |                                                                         |
| chr2 Cufflinks exon118943931           | 118943954 | . | - | . | gene_id "XLOC_031334"; transcript_id "TCONS_00052409"; exon_number "3"; |
| oId "CUFF.53005.2"; tss_id "TSS39528"; |           |   |   |   |                                                                         |
| chr2 Cufflinks exon118940408           | 118940899 | . | - | . | gene_id "XLOC_031334"; transcript_id "TCONS_00052412"; exon_number "1"; |
| oId "CUFF.53005.4"; tss_id "TSS39528"; |           |   |   |   |                                                                         |
| chr2 Cufflinks exon118942915           | 118944047 | . | - | . | gene_id "XLOC_031334"; transcript_id "TCONS_00052412"; exon_number "2"; |
| oId "CUFF.53005.4"; tss_id "TSS39528"; |           |   |   |   |                                                                         |
| chr2 Cufflinks exon118940408           | 118940898 | . | - | . | gene_id "XLOC_031334"; transcript_id "TCONS_00052411"; exon_number "1"; |
| oId "CUFF.53005.3"; tss_id "TSS39528"; |           |   |   |   |                                                                         |
| chr2 Cufflinks exon118942914           | 118942966 | . | - | . | gene_id "XLOC_031334"; transcript_id "TCONS_00052411"; exon_number "2"; |

|                                         |   |   |   |                                                                         |  |
|-----------------------------------------|---|---|---|-------------------------------------------------------------------------|--|
| oId "CUFF.53005.3"; tss_id "TSS39528";  |   |   |   |                                                                         |  |
| chr2 Cufflinks exon118943327 118944047  | . | - | . | gene_id "XLOC_031334"; transcript_id "TCONS_00052411"; exon_number "3"; |  |
| oId "CUFF.53005.3"; tss_id "TSS39528";  |   |   |   |                                                                         |  |
| chr2 Cufflinks exon118940408 118940898  | . | - | . | gene_id "XLOC_031334"; transcript_id "TCONS_00052410"; exon_number "1"; |  |
| oId "CUFF.53005.1"; tss_id "TSS39528";  |   |   |   |                                                                         |  |
| chr2 Cufflinks exon118942914 118944047  | . | - | . | gene_id "XLOC_031334"; transcript_id "TCONS_00052410"; exon_number "2"; |  |
| oId "CUFF.53005.1"; tss_id "TSS39528";  |   |   |   |                                                                         |  |
| chr2 Cufflinks exon128181464 128183713  | . | - | . | gene_id "XLOC_031380"; transcript_id "TCONS_00052484"; exon_number "1"; |  |
| oId "CUFF.53415.2"; tss_id "TSS39583";  |   |   |   |                                                                         |  |
| chr2 Cufflinks exon128185687 128185840  | . | - | . | gene_id "XLOC_031380"; transcript_id "TCONS_00052484"; exon_number "2"; |  |
| oId "CUFF.53415.2"; tss_id "TSS39583";  |   |   |   |                                                                         |  |
| chr2 Cufflinks exon128227562 128227710  | . | - | . | gene_id "XLOC_031380"; transcript_id "TCONS_00052484"; exon_number "3"; |  |
| oId "CUFF.53415.2"; tss_id "TSS39583";  |   |   |   |                                                                         |  |
| chr2 Cufflinks exon128227827 128228453  | . | - | . | gene_id "XLOC_031380"; transcript_id "TCONS_00052484"; exon_number "4"; |  |
| oId "CUFF.53415.2"; tss_id "TSS39583";  |   |   |   |                                                                         |  |
| chr2 Cufflinks exon128219857 128227710  | . | - | . | gene_id "XLOC_031380"; transcript_id "TCONS_00052490"; exon_number "1"; |  |
| oId "CUFF.53415.11"; tss_id "TSS39584"; |   |   |   |                                                                         |  |
| chr2 Cufflinks exon128227827 128227926  | . | - | . | gene_id "XLOC_031380"; transcript_id "TCONS_00052490"; exon_number "2"; |  |
| oId "CUFF.53415.11"; tss_id "TSS39584"; |   |   |   |                                                                         |  |
| chr2 Cufflinks exon128219857 128227248  | . | - | . | gene_id "XLOC_031380"; transcript_id "TCONS_00052491"; exon_number "1"; |  |
| oId "CUFF.53415.8"; tss_id "TSS39585";  |   |   |   |                                                                         |  |
| chr2 Cufflinks exon128227562 128227710  | . | - | . | gene_id "XLOC_031380"; transcript_id "TCONS_00052491"; exon_number "2"; |  |
| oId "CUFF.53415.8"; tss_id "TSS39585";  |   |   |   |                                                                         |  |
| chr2 Cufflinks exon128227827 128230976  | . | - | . | gene_id "XLOC_031380"; transcript_id "TCONS_00052491"; exon_number "3"; |  |
| oId "CUFF.53415.8"; tss_id "TSS39585";  |   |   |   |                                                                         |  |
| chr2 Cufflinks exon129441788 129456034  | . | - | . | gene_id "XLOC_031415"; transcript_id "TCONS_00052545"; exon_number "1"; |  |
| oId "CUFF.53518.2"; tss_id "TSS39631";  |   |   |   |                                                                         |  |
| chr2 Cufflinks exon129456937 129456951  | . | - | . | gene_id "XLOC_031415"; transcript_id "TCONS_00052545"; exon_number "2"; |  |
| oId "CUFF.53518.2"; tss_id "TSS39631";  |   |   |   |                                                                         |  |
| chr2 Cufflinks exon129441788 129456034  | . | - | . | gene_id "XLOC_031415"; transcript_id "TCONS_00052546"; exon_number "1"; |  |
| oId "CUFF.53518.1"; tss_id "TSS39632";  |   |   |   |                                                                         |  |
| chr2 Cufflinks exon129468231 129468476  | . | - | . | gene_id "XLOC_031415"; transcript_id "TCONS_00052546"; exon_number "2"; |  |
| oId "CUFF.53518.1"; tss_id "TSS39632";  |   |   |   |                                                                         |  |
| chr2 Cufflinks exon129441788 129456034  | . | - | . | gene_id "XLOC_031415"; transcript_id "TCONS_00052547"; exon_number "1"; |  |
| oId "CUFF.53518.3"; tss_id "TSS39632";  |   |   |   |                                                                         |  |
| chr2 Cufflinks exon129468267 129468499  | . | - | . | gene_id "XLOC_031415"; transcript_id "TCONS_00052547"; exon_number "2"; |  |
| oId "CUFF.53518.3"; tss_id "TSS39632";  |   |   |   |                                                                         |  |
| chr2 Cufflinks exon132219728 132222620  | . | - | . | gene_id "XLOC_031446"; transcript_id "TCONS_00052600"; exon_number "1"; |  |
| oId "CUFF.53608.5"; tss_id "TSS39674";  |   |   |   |                                                                         |  |
| chr2 Cufflinks exon132224742 132224828  | . | - | . | gene_id "XLOC_031446"; transcript_id "TCONS_00052600"; exon_number "2"; |  |
| oId "CUFF.53608.5"; tss_id "TSS39674";  |   |   |   |                                                                         |  |
| chr2 Cufflinks exon132227779 132227903  | . | - | . | gene_id "XLOC_031446"; transcript_id "TCONS_00052600"; exon_number "3"; |  |
| oId "CUFF.53608.5"; tss_id "TSS39674";  |   |   |   |                                                                         |  |

|                                        |           |   |   |   |                                                                         |
|----------------------------------------|-----------|---|---|---|-------------------------------------------------------------------------|
| chr2 Cufflinks exon132578664           | 132587928 | . | - | . | gene_id "XLOC_031455"; transcript_id "TCONS_00052611"; exon_number "1"; |
| oId "CUFF.53649.2"; tss_id "TSS39683"; |           |   |   |   |                                                                         |
| chr2 Cufflinks exon132589522           | 132589815 | . | - | . | gene_id "XLOC_031455"; transcript_id "TCONS_00052611"; exon_number "2"; |
| oId "CUFF.53649.2"; tss_id "TSS39683"; |           |   |   |   |                                                                         |
| chr2 Cufflinks exon132578664           | 132587768 | . | - | . | gene_id "XLOC_031455"; transcript_id "TCONS_00052610"; exon_number "1"; |
| oId "CUFF.53649.1"; tss_id "TSS39683"; |           |   |   |   |                                                                         |
| chr2 Cufflinks exon132589522           | 132589815 | . | - | . | gene_id "XLOC_031455"; transcript_id "TCONS_00052610"; exon_number "2"; |
| oId "CUFF.53649.1"; tss_id "TSS39683"; |           |   |   |   |                                                                         |
| chr2 Cufflinks exon135622180           | 135625309 | . | - | . | gene_id "XLOC_031468"; transcript_id "TCONS_00052632"; exon_number "1"; |
| oId "CUFF.53754.2"; tss_id "TSS39699"; |           |   |   |   |                                                                         |
| chr2 Cufflinks exon135626514           | 135626611 | . | - | . | gene_id "XLOC_031468"; transcript_id "TCONS_00052632"; exon_number "2"; |
| oId "CUFF.53754.2"; tss_id "TSS39699"; |           |   |   |   |                                                                         |
| chr2 Cufflinks exon135635090           | 135635213 | . | - | . | gene_id "XLOC_031468"; transcript_id "TCONS_00052632"; exon_number "3"; |
| oId "CUFF.53754.2"; tss_id "TSS39699"; |           |   |   |   |                                                                         |
| chr2 Cufflinks exon135676133           | 135676250 | . | - | . | gene_id "XLOC_031468"; transcript_id "TCONS_00052632"; exon_number "4"; |
| oId "CUFF.53754.2"; tss_id "TSS39699"; |           |   |   |   |                                                                         |
| chr2 Cufflinks exon135622180           | 135625309 | . | - | . | gene_id "XLOC_031468"; transcript_id "TCONS_00052631"; exon_number "1"; |
| oId "CUFF.53754.1"; tss_id "TSS39699"; |           |   |   |   |                                                                         |
| chr2 Cufflinks exon135626514           | 135626611 | . | - | . | gene_id "XLOC_031468"; transcript_id "TCONS_00052631"; exon_number "2"; |
| oId "CUFF.53754.1"; tss_id "TSS39699"; |           |   |   |   |                                                                         |
| chr2 Cufflinks exon135676133           | 135676250 | . | - | . | gene_id "XLOC_031468"; transcript_id "TCONS_00052631"; exon_number "3"; |
| oId "CUFF.53754.1"; tss_id "TSS39699"; |           |   |   |   |                                                                         |
| chr2 Cufflinks exon138836458           | 138836654 | . | - | . | gene_id "XLOC_031496"; transcript_id "TCONS_00052671"; exon_number "1"; |
| oId "CUFF.53854.1"; tss_id "TSS39730"; |           |   |   |   |                                                                         |
| chr2 Cufflinks exon138910037           | 138910237 | . | - | . | gene_id "XLOC_031496"; transcript_id "TCONS_00052671"; exon_number "2"; |
| oId "CUFF.53854.1"; tss_id "TSS39730"; |           |   |   |   |                                                                         |
| chr2 Cufflinks exon138911375           | 138911476 | . | - | . | gene_id "XLOC_031496"; transcript_id "TCONS_00052671"; exon_number "3"; |
| oId "CUFF.53854.1"; tss_id "TSS39730"; |           |   |   |   |                                                                         |
| chr2 Cufflinks exon138970327           | 138970469 | . | - | . | gene_id "XLOC_031496"; transcript_id "TCONS_00052671"; exon_number "4"; |
| oId "CUFF.53854.1"; tss_id "TSS39730"; |           |   |   |   |                                                                         |
| chr2 Cufflinks exon138950893           | 138950920 | . | - | . | gene_id "XLOC_031496"; transcript_id "TCONS_00052672"; exon_number "1"; |
| oId "CUFF.53854.2"; tss_id "TSS39731"; |           |   |   |   |                                                                         |
| chr2 Cufflinks exon138970327           | 138970467 | . | - | . | gene_id "XLOC_031496"; transcript_id "TCONS_00052672"; exon_number "2"; |
| oId "CUFF.53854.2"; tss_id "TSS39731"; |           |   |   |   |                                                                         |
| chr2 Cufflinks exon139258325           | 139258450 | . | - | . | gene_id "XLOC_031496"; transcript_id "TCONS_00052672"; exon_number "3"; |
| oId "CUFF.53854.2"; tss_id "TSS39731"; |           |   |   |   |                                                                         |
| chr2 Cufflinks exon139258888           | 139259252 | . | - | . | gene_id "XLOC_031496"; transcript_id "TCONS_00052672"; exon_number "4"; |
| oId "CUFF.53854.2"; tss_id "TSS39731"; |           |   |   |   |                                                                         |
| chr2 Cufflinks exon139036148           | 139036170 | . | - | . | gene_id "XLOC_031496"; transcript_id "TCONS_00052673"; exon_number "1"; |
| oId "CUFF.53854.3"; tss_id "TSS39731"; |           |   |   |   |                                                                         |
| chr2 Cufflinks exon139049373           | 139049536 | . | - | . | gene_id "XLOC_031496"; transcript_id "TCONS_00052673"; exon_number "2"; |
| oId "CUFF.53854.3"; tss_id "TSS39731"; |           |   |   |   |                                                                         |
| chr2 Cufflinks exon139057031           | 139057107 | . | - | . | gene_id "XLOC_031496"; transcript_id "TCONS_00052673"; exon_number "3"; |

oId "CUFF.53854.3"; tss\_id "TSS39731";  
chr2 Cufflinks exon139258325 139258450 . - . gene\_id "XLOC\_031496"; transcript\_id "TCONS\_00052673"; exon\_number "4";  
oId "CUFF.53854.3"; tss\_id "TSS39731";  
chr2 Cufflinks exon139258889 139259252 . - . gene\_id "XLOC\_031496"; transcript\_id "TCONS\_00052673"; exon\_number "5";  
oId "CUFF.53854.3"; tss\_id "TSS39731";  
chr2 Cufflinks exon139106285 139106319 . - . gene\_id "XLOC\_031496"; transcript\_id "TCONS\_00052675"; exon\_number "1";  
oId "CUFF.53854.4"; tss\_id "TSS39731";  
chr2 Cufflinks exon139258325 139258450 . - . gene\_id "XLOC\_031496"; transcript\_id "TCONS\_00052675"; exon\_number "2";  
oId "CUFF.53854.4"; tss\_id "TSS39731";  
chr2 Cufflinks exon139258889 139259210 . - . gene\_id "XLOC\_031496"; transcript\_id "TCONS\_00052675"; exon\_number "3";  
oId "CUFF.53854.4"; tss\_id "TSS39731";  
chr2 Cufflinks exon139125155 139125181 . - . gene\_id "XLOC\_031496"; transcript\_id "TCONS\_00052676"; exon\_number "1";  
oId "CUFF.53854.5"; tss\_id "TSS39731";  
chr2 Cufflinks exon 139258325 139258450 . - . gene\_id "XLOC\_031496"; transcript\_id "TCONS\_00052676"; exon\_number  
"2"; oId "CUFF.53854.5"; tss\_id "TSS39731";  
chr2 Cufflinks exon 139258889 139259252 . - . gene\_id "XLOC\_031496"; transcript\_id "TCONS\_00052676";  
exon\_number "3"; oId "CUFF.53854.5"; tss\_id "TSS39731";  
chr2 Cufflinks exon 139257431 139258450 . - . gene\_id "XLOC\_031496"; transcript\_id "TCONS\_00052680";  
exon\_number "1"; oId "CUFF.53854.6"; tss\_id "TSS39731";  
chr2 Cufflinks exon 139258889 139259268 . - . gene\_id "XLOC\_031496"; transcript\_id "TCONS\_00052680";  
exon\_number "2"; oId "CUFF.53854.6"; tss\_id "TSS39731";  
chr2 Cufflinks exon 152623630 152623767 . - . gene\_id "XLOC\_031528"; transcript\_id "TCONS\_00052724";  
exon\_number "1"; oId "CUFF.53990.1"; tss\_id "TSS39771";  
chr2 Cufflinks exon 152633110 152633241 . - . gene\_id "XLOC\_031528"; transcript\_id "TCONS\_00052724";  
exon\_number "2"; oId "CUFF.53990.1"; tss\_id "TSS39771";  
chr2 Cufflinks exon 152642682 152643566 . - . gene\_id "XLOC\_031528"; transcript\_id "TCONS\_00052724";  
exon\_number "3"; oId "CUFF.53990.1"; tss\_id "TSS39771";  
chr2 Cufflinks exon 152637344 152637859 . - . gene\_id "XLOC\_031528"; transcript\_id "TCONS\_00052728";  
exon\_number "1"; oId "CUFF.53990.3"; tss\_id "TSS39773";  
chr2 Cufflinks exon 152638123 152643333 . - . gene\_id "XLOC\_031528"; transcript\_id "TCONS\_00052728";  
exon\_number "2"; oId "CUFF.53990.3"; tss\_id "TSS39773";  
chr2 Cufflinks exon 154276964 154278484 . - . gene\_id "XLOC\_031549"; transcript\_id "TCONS\_00052764";  
exon\_number "1"; oId "CUFF.54028.4"; tss\_id "TSS39803";  
chr2 Cufflinks exon 154449380 154449411 . - . gene\_id "XLOC\_031549"; transcript\_id "TCONS\_00052764";  
exon\_number "2"; oId "CUFF.54028.4"; tss\_id "TSS39803";  
chr2 Cufflinks exon 154276964 154278477 . - . gene\_id "XLOC\_031549"; transcript\_id "TCONS\_00052765";  
exon\_number "1"; oId "CUFF.54028.3"; tss\_id "TSS39804";  
chr2 Cufflinks exon 154449373 154449678 . - . gene\_id "XLOC\_031549"; transcript\_id "TCONS\_00052765";  
exon\_number "2"; oId "CUFF.54028.3"; tss\_id "TSS39804";  
chr2 Cufflinks exon 166702555 166702602 . - . gene\_id "XLOC\_031612"; transcript\_id "TCONS\_00052887";  
exon\_number "1"; oId "CUFF.54248.1"; tss\_id "TSS39881";  
chr2 Cufflinks exon 166714725 166714914 . - . gene\_id "XLOC\_031612"; transcript\_id "TCONS\_00052887";  
exon\_number "2"; oId "CUFF.54248.1"; tss\_id "TSS39881";

|      |             |      |                     |                    |   |   |   |                                                        |
|------|-------------|------|---------------------|--------------------|---|---|---|--------------------------------------------------------|
| chr2 | Cufflinks   | exon | 166727307           | 166729385          | . | - | . | gene_id "XLOC_031612"; transcript_id "TCONS_00052887"; |
|      | exon_number | "3"; | oId "CUFF.54248.1"; | tss_id "TSS39881"; |   |   |   |                                                        |
| chr2 | Cufflinks   | exon | 166713986           | 166714124          | . | - | . | gene_id "XLOC_031612"; transcript_id "TCONS_00052889"; |
|      | exon_number | "1"; | oId "CUFF.54248.2"; | tss_id "TSS39882"; |   |   |   |                                                        |
| chr2 | Cufflinks   | exon | 166714725           | 166714914          | . | - | . | gene_id "XLOC_031612"; transcript_id "TCONS_00052889"; |
|      | exon_number | "2"; | oId "CUFF.54248.2"; | tss_id "TSS39882"; |   |   |   |                                                        |
| chr2 | Cufflinks   | exon | 166719454           | 166719575          | . | - | . | gene_id "XLOC_031612"; transcript_id "TCONS_00052889"; |
|      | exon_number | "3"; | oId "CUFF.54248.2"; | tss_id "TSS39882"; |   |   |   |                                                        |
| chr2 | Cufflinks   | exon | 166727307           | 166728451          | . | - | . | gene_id "XLOC_031612"; transcript_id "TCONS_00052889"; |
|      | exon_number | "4"; | oId "CUFF.54248.2"; | tss_id "TSS39882"; |   |   |   |                                                        |
| chr2 | Cufflinks   | exon | 166723894           | 166725504          | . | - | . | gene_id "XLOC_031612"; transcript_id "TCONS_00052890"; |
|      | exon_number | "1"; | oId "CUFF.54248.3"; | tss_id "TSS39881"; |   |   |   |                                                        |
| chr2 | Cufflinks   | exon | 166727307           | 166729385          | . | - | . | gene_id "XLOC_031612"; transcript_id "TCONS_00052890"; |
|      | exon_number | "2"; | oId "CUFF.54248.3"; | tss_id "TSS39881"; |   |   |   |                                                        |
| chr2 | Cufflinks   | exon | 169715039           | 169723202          | . | - | . | gene_id "XLOC_031626"; transcript_id "TCONS_00052908"; |
|      | exon_number | "1"; | oId "CUFF.54279.1"; | tss_id "TSS39898"; |   |   |   |                                                        |
| chr2 | Cufflinks   | exon | 169726933           | 169726987          | . | - | . | gene_id "XLOC_031626"; transcript_id "TCONS_00052908"; |
|      | exon_number | "2"; | oId "CUFF.54279.1"; | tss_id "TSS39898"; |   |   |   |                                                        |
| chr2 | Cufflinks   | exon | 172373272           | 172374262          | . | - | . | gene_id "XLOC_031649"; transcript_id "TCONS_00052946"; |
|      | exon_number | "1"; | oId "CUFF.54408.1"; | tss_id "TSS39929"; |   |   |   |                                                        |
| chr2 | Cufflinks   | exon | 172377959           | 172379703          | . | - | . | gene_id "XLOC_031649"; transcript_id "TCONS_00052946"; |
|      | exon_number | "2"; | oId "CUFF.54408.1"; | tss_id "TSS39929"; |   |   |   |                                                        |
| chr2 | Cufflinks   | exon | 174176671           | 174177020          | . | - | . | gene_id "XLOC_031660"; transcript_id "TCONS_00052962"; |
|      | exon_number | "1"; | oId "CUFF.54501.2"; | tss_id "TSS39944"; |   |   |   |                                                        |
| chr2 | Cufflinks   | exon | 174186744           | 174186777          | . | - | . | gene_id "XLOC_031660"; transcript_id "TCONS_00052962"; |
|      | exon_number | "2"; | oId "CUFF.54501.2"; | tss_id "TSS39944"; |   |   |   |                                                        |
| chr2 | Cufflinks   | exon | 174218411           | 174219235          | . | - | . | gene_id "XLOC_031660"; transcript_id "TCONS_00052962"; |
|      | exon_number | "3"; | oId "CUFF.54501.2"; | tss_id "TSS39944"; |   |   |   |                                                        |
| chr2 | Cufflinks   | exon | 174176671           | 174177020          | . | - | . | gene_id "XLOC_031660"; transcript_id "TCONS_00052963"; |
|      | exon_number | "1"; | oId "CUFF.54501.1"; | tss_id "TSS39944"; |   |   |   |                                                        |
| chr2 | Cufflinks   | exon | 174218411           | 174219269          | . | - | . | gene_id "XLOC_031660"; transcript_id "TCONS_00052963"; |
|      | exon_number | "2"; | oId "CUFF.54501.1"; | tss_id "TSS39944"; |   |   |   |                                                        |
| chr2 | Cufflinks   | exon | 177037917           | 177041420          | . | - | . | gene_id "XLOC_031688"; transcript_id "TCONS_00053026"; |
|      | exon_number | "1"; | oId "CUFF.54614.3"; | tss_id "TSS39982"; |   |   |   |                                                        |
| chr2 | Cufflinks   | exon | 177042060           | 177042222          | . | - | . | gene_id "XLOC_031688"; transcript_id "TCONS_00053026"; |
|      | exon_number | "2"; | oId "CUFF.54614.3"; | tss_id "TSS39982"; |   |   |   |                                                        |
| chr2 | Cufflinks   | exon | 177042731           | 177042857          | . | - | . | gene_id "XLOC_031688"; transcript_id "TCONS_00053026"; |
|      | exon_number | "3"; | oId "CUFF.54614.3"; | tss_id "TSS39982"; |   |   |   |                                                        |
| chr2 | Cufflinks   | exon | 177037917           | 177041420          | . | - | . | gene_id "XLOC_031688"; transcript_id "TCONS_00053027"; |
|      | exon_number | "1"; | oId "CUFF.54614.4"; | tss_id "TSS39982"; |   |   |   |                                                        |
| chr2 | Cufflinks   | exon | 177042060           | 177042222          | . | - | . | gene_id "XLOC_031688"; transcript_id "TCONS_00053027"; |
|      | exon_number | "2"; | oId "CUFF.54614.4"; | tss_id "TSS39982"; |   |   |   |                                                        |
| chr2 | Cufflinks   | exon | 177042743           | 177042857          | . | - | . | gene_id "XLOC_031688"; transcript_id "TCONS_00053027"; |

|                                                         |                                                                             |
|---------------------------------------------------------|-----------------------------------------------------------------------------|
| exon_number "3"; oId "CUFF.54614.4"; tss_id "TSS39982"; |                                                                             |
| chr2 Cufflinks exon 177037917 177041420 .               | - . gene_id "XLOC_031688"; transcript_id "TCONS_00053025";                  |
| exon_number "1"; oId "CUFF.54614.2"; tss_id "TSS39982"; |                                                                             |
| chr2 Cufflinks exon 177042060 177042222 .               | - . gene_id "XLOC_031688"; transcript_id "TCONS_00053025";                  |
| exon_number "2"; oId "CUFF.54614.2"; tss_id "TSS39982"; |                                                                             |
| chr2 Cufflinks exon 177042439 177042857 .               | - . gene_id "XLOC_031688"; transcript_id "TCONS_00053025";                  |
| exon_number "3"; oId "CUFF.54614.2"; tss_id "TSS39982"; |                                                                             |
| chr2 Cufflinks exon 177037917 177041420 .               | - . gene_id "XLOC_031688"; transcript_id "TCONS_00053024";                  |
| exon_number "1"; oId "CUFF.54614.1"; tss_id "TSS39982"; |                                                                             |
| chr2 Cufflinks exon 177042439 177042857 .               | - . gene_id "XLOC_031688"; transcript_id "TCONS_00053024";                  |
| exon_number "2"; oId "CUFF.54614.1"; tss_id "TSS39982"; |                                                                             |
| chr2 Cufflinks exon 177037917 177041420 .               | - . gene_id "XLOC_031688"; transcript_id "TCONS_00053028";                  |
| exon_number "1"; oId "CUFF.54614.5"; tss_id "TSS39983"; |                                                                             |
| chr2 Cufflinks exon 177042060 177042223 .               | - . gene_id "XLOC_031688"; transcript_id "TCONS_00053028";                  |
| exon_number "2"; oId "CUFF.54614.5"; tss_id "TSS39983"; |                                                                             |
| chr2 Cufflinks exon 177043000 177043384 .               | - . gene_id "XLOC_031688"; transcript_id "TCONS_00053028";                  |
| exon_number "3"; oId "CUFF.54614.5"; tss_id "TSS39983"; |                                                                             |
| chr2 Cufflinks exon 177037917 177041420 .               | - . gene_id "XLOC_031688"; transcript_id "TCONS_00053029"; exon_number      |
| "1"; oId "CUFF.54614.6"; tss_id "TSS39984";             |                                                                             |
| chr2 Cufflinks exon 177042060 177042222 .               | - . gene_id "XLOC_031688"; transcript_id "TCONS_00053029"; exon_number "2"; |
| oId "CUFF.54614.6"; tss_id "TSS39984";                  |                                                                             |
| chr2 Cufflinks exon 177053147 177053300 .               | - . gene_id "XLOC_031688"; transcript_id "TCONS_00053029"; exon_number "3"; |
| oId "CUFF.54614.6"; tss_id "TSS39984";                  |                                                                             |
| chr2 Cufflinks exon 178058187 178058219 .               | - . gene_id "XLOC_031691"; transcript_id "TCONS_00053032"; exon_number "1"; |
| oId "CUFF.54632.1"; tss_id "TSS39987";                  |                                                                             |
| chr2 Cufflinks exon 178076833 178077045 .               | - . gene_id "XLOC_031691"; transcript_id "TCONS_00053032"; exon_number "2"; |
| oId "CUFF.54632.1"; tss_id "TSS39987";                  |                                                                             |
| chr2 Cufflinks exon 178077786 178077810 .               | - . gene_id "XLOC_031691"; transcript_id "TCONS_00053032"; exon_number "3"; |
| oId "CUFF.54632.1"; tss_id "TSS39987";                  |                                                                             |
| chr2 Cufflinks exon 178063917 178065382 .               | - . gene_id "XLOC_031692"; transcript_id "TCONS_00053033"; exon_number "1"; |
| oId "CUFF.54632.3"; tss_id "TSS39988";                  |                                                                             |
| chr2 Cufflinks exon 178178256 178179592 .               | - . gene_id "XLOC_031692"; transcript_id "TCONS_00053033"; exon_number "2"; |
| oId "CUFF.54632.3"; tss_id "TSS39988";                  |                                                                             |
| chr2 Cufflinks exon 178148236 178152562 .               | - . gene_id "XLOC_031692"; transcript_id "TCONS_00053042"; exon_number "1"; |
| oId "CUFF.54632.6"; tss_id "TSS39989";                  |                                                                             |
| chr2 Cufflinks exon 178175692 178175763 .               | - . gene_id "XLOC_031692"; transcript_id "TCONS_00053042"; exon_number "2"; |
| oId "CUFF.54632.6"; tss_id "TSS39989";                  |                                                                             |
| chr2 Cufflinks exon 178175961 178176056 .               | - . gene_id "XLOC_031692"; transcript_id "TCONS_00053042"; exon_number "3"; |
| oId "CUFF.54632.6"; tss_id "TSS39989";                  |                                                                             |
| chr2 Cufflinks exon 178187967 178188124 .               | - . gene_id "XLOC_031692"; transcript_id "TCONS_00053042"; exon_number "4"; |
| oId "CUFF.54632.6"; tss_id "TSS39989";                  |                                                                             |
| chr2 Cufflinks exon 178199121 178199257 .               | - . gene_id "XLOC_031692"; transcript_id "TCONS_00053042"; exon_number "5"; |
| oId "CUFF.54632.6"; tss_id "TSS39989";                  |                                                                             |



|                                        |           |   |   |   |                                                                         |
|----------------------------------------|-----------|---|---|---|-------------------------------------------------------------------------|
| chr2 Cufflinks exon178203326           | 178203427 | . | - | . | gene_id "XLOC_031692"; transcript_id "TCONS_00053042"; exon_number "6"; |
| oId "CUFF.54632.6"; tss_id "TSS39989"; |           |   |   |   |                                                                         |
| chr2 Cufflinks exon178206738           | 178206767 | . | - | . | gene_id "XLOC_031692"; transcript_id "TCONS_00053042"; exon_number "7"; |
| oId "CUFF.54632.6"; tss_id "TSS39989"; |           |   |   |   |                                                                         |
| chr2 Cufflinks exon178148236           | 178152562 | . | - | . | gene_id "XLOC_031692"; transcript_id "TCONS_00053043"; exon_number "1"; |
| oId "CUFF.54632.7"; tss_id "TSS39989"; |           |   |   |   |                                                                         |
| chr2 Cufflinks exon178175692           | 178175763 | . | - | . | gene_id "XLOC_031692"; transcript_id "TCONS_00053043"; exon_number "2"; |
| oId "CUFF.54632.7"; tss_id "TSS39989"; |           |   |   |   |                                                                         |
| chr2 Cufflinks exon178175961           | 178176053 | . | - | . | gene_id "XLOC_031692"; transcript_id "TCONS_00053043"; exon_number "3"; |
| oId "CUFF.54632.7"; tss_id "TSS39989"; |           |   |   |   |                                                                         |
| chr2 Cufflinks exon178187967           | 178188124 | . | - | . | gene_id "XLOC_031692"; transcript_id "TCONS_00053043"; exon_number "4"; |
| oId "CUFF.54632.7"; tss_id "TSS39989"; |           |   |   |   |                                                                         |
| chr2 Cufflinks exon178199121           | 178199257 | . | - | . | gene_id "XLOC_031692"; transcript_id "TCONS_00053043"; exon_number "5"; |
| oId "CUFF.54632.7"; tss_id "TSS39989"; |           |   |   |   |                                                                         |
| chr2 Cufflinks exon178203326           | 178203427 | . | - | . | gene_id "XLOC_031692"; transcript_id "TCONS_00053043"; exon_number "6"; |
| oId "CUFF.54632.7"; tss_id "TSS39989"; |           |   |   |   |                                                                         |
| chr2 Cufflinks exon178206738           | 178206818 | . | - | . | gene_id "XLOC_031692"; transcript_id "TCONS_00053043"; exon_number "7"; |
| oId "CUFF.54632.7"; tss_id "TSS39989"; |           |   |   |   |                                                                         |
| chr2 Cufflinks exon178148236           | 178148532 | . | - | . | gene_id "XLOC_031692"; transcript_id "TCONS_00053045"; exon_number "1"; |
| oId "CUFF.54632.8"; tss_id "TSS39990"; |           |   |   |   |                                                                         |
| chr2 Cufflinks exon178152339           | 178152562 | . | - | . | gene_id "XLOC_031692"; transcript_id "TCONS_00053045"; exon_number "2"; |
| oId "CUFF.54632.8"; tss_id "TSS39990"; |           |   |   |   |                                                                         |
| chr2 Cufflinks exon178175692           | 178175763 | . | - | . | gene_id "XLOC_031692"; transcript_id "TCONS_00053045"; exon_number "3"; |
| oId "CUFF.54632.8"; tss_id "TSS39990"; |           |   |   |   |                                                                         |
| chr2 Cufflinks exon178175961           | 178176056 | . | - | . | gene_id "XLOC_031692"; transcript_id "TCONS_00053045"; exon_number "4"; |
| oId "CUFF.54632.8"; tss_id "TSS39990"; |           |   |   |   |                                                                         |
| chr2 Cufflinks exon178187967           | 178188124 | . | - | . | gene_id "XLOC_031692"; transcript_id "TCONS_00053045"; exon_number "5"; |
| oId "CUFF.54632.8"; tss_id "TSS39990"; |           |   |   |   |                                                                         |
| chr2 Cufflinks exon178199121           | 178199257 | . | - | . | gene_id "XLOC_031692"; transcript_id "TCONS_00053045"; exon_number "6"; |
| oId "CUFF.54632.8"; tss_id "TSS39990"; |           |   |   |   |                                                                         |
| chr2 Cufflinks exon178203326           | 178203427 | . | - | . | gene_id "XLOC_031692"; transcript_id "TCONS_00053045"; exon_number "7"; |
| oId "CUFF.54632.8"; tss_id "TSS39990"; |           |   |   |   |                                                                         |
| chr2 Cufflinks exon178257301           | 178257419 | . | - | . | gene_id "XLOC_031692"; transcript_id "TCONS_00053045"; exon_number "8"; |
| oId "CUFF.54632.8"; tss_id "TSS39990"; |           |   |   |   |                                                                         |
| chr2 Cufflinks exon178148236           | 178152562 | . | - | . | gene_id "XLOC_031692"; transcript_id "TCONS_00053044"; exon_number "1"; |
| oId "CUFF.54632.5"; tss_id "TSS39990"; |           |   |   |   |                                                                         |
| chr2 Cufflinks exon178175692           | 178175763 | . | - | . | gene_id "XLOC_031692"; transcript_id "TCONS_00053044"; exon_number "2"; |
| oId "CUFF.54632.5"; tss_id "TSS39990"; |           |   |   |   |                                                                         |
| chr2 Cufflinks exon178175961           | 178176056 | . | - | . | gene_id "XLOC_031692"; transcript_id "TCONS_00053044"; exon_number "3"; |
| oId "CUFF.54632.5"; tss_id "TSS39990"; |           |   |   |   |                                                                         |
| chr2 Cufflinks exon178187967           | 178188124 | . | - | . | gene_id "XLOC_031692"; transcript_id "TCONS_00053044"; exon_number "4"; |
| oId "CUFF.54632.5"; tss_id "TSS39990"; |           |   |   |   |                                                                         |
| chr2 Cufflinks exon178196300           | 178196384 | . | - | . | gene_id "XLOC_031692"; transcript_id "TCONS_00053044"; exon_number "5"; |

oId "CUFF.54632.5"; tss\_id "TSS39990";  
chr2 Cufflinks exon178196870 178196979 . - . gene\_id "XLOC\_031692"; transcript\_id "TCONS\_00053044"; exon\_number "6";  
oId "CUFF.54632.5"; tss\_id "TSS39990";  
chr2 Cufflinks exon178199121 178199257 . - . gene\_id "XLOC\_031692"; transcript\_id "TCONS\_00053044"; exon\_number "7";  
oId "CUFF.54632.5"; tss\_id "TSS39990";  
chr2 Cufflinks exon178203326 178203427 . - . gene\_id "XLOC\_031692"; transcript\_id "TCONS\_00053044"; exon\_number "8";  
oId "CUFF.54632.5"; tss\_id "TSS39990";  
chr2 Cufflinks exon178257301 178257419 . - . gene\_id "XLOC\_031692"; transcript\_id "TCONS\_00053044"; exon\_number "9";  
oId "CUFF.54632.5"; tss\_id "TSS39990";  
chr2 Cufflinks exon178148236 178152562 . - . gene\_id "XLOC\_031692"; transcript\_id "TCONS\_00053046"; exon\_number "1";  
oId "CUFF.54632.4"; tss\_id "TSS39990";  
chr2 Cufflinks exon178175692 178175763 . - . gene\_id "XLOC\_031692"; transcript\_id "TCONS\_00053046"; exon\_number "2";  
oId "CUFF.54632.4"; tss\_id "TSS39990";  
chr2 Cufflinks exon178175961 178176056 . - . gene\_id "XLOC\_031692"; transcript\_id "TCONS\_00053046"; exon\_number "3";  
oId "CUFF.54632.4"; tss\_id "TSS39990";  
chr2 Cufflinks exon178187967 178188124 . - . gene\_id "XLOC\_031692"; transcript\_id "TCONS\_00053046"; exon\_number "4";  
oId "CUFF.54632.4"; tss\_id "TSS39990";  
chr2 Cufflinks exon178199121 178199257 . - . gene\_id "XLOC\_031692"; transcript\_id "TCONS\_00053046"; exon\_number "5";  
oId "CUFF.54632.4"; tss\_id "TSS39990";  
chr2 Cufflinks exon178203326 178203427 . - . gene\_id "XLOC\_031692"; transcript\_id "TCONS\_00053046"; exon\_number "6";  
oId "CUFF.54632.4"; tss\_id "TSS39990";  
chr2 Cufflinks exon178257301 178257445 . - . gene\_id "XLOC\_031692"; transcript\_id "TCONS\_00053046"; exon\_number "7";  
oId "CUFF.54632.4"; tss\_id "TSS39990";  
chr2 Cufflinks exon178177014 178186965 . - . gene\_id "XLOC\_031692"; transcript\_id "TCONS\_00053054"; exon\_number "1";  
oId "CUFF.54632.11"; tss\_id "TSS39989";  
chr2 Cufflinks exon178187967 178188124 . - . gene\_id "XLOC\_031692"; transcript\_id "TCONS\_00053054"; exon\_number "2";  
oId "CUFF.54632.11"; tss\_id "TSS39989";  
chr2 Cufflinks exon178199121 178199257 . - . gene\_id "XLOC\_031692"; transcript\_id "TCONS\_00053054"; exon\_number "3";  
oId "CUFF.54632.11"; tss\_id "TSS39989";  
chr2 Cufflinks exon178203326 178203427 . - . gene\_id "XLOC\_031692"; transcript\_id "TCONS\_00053054"; exon\_number "4";  
oId "CUFF.54632.11"; tss\_id "TSS39989";  
chr2 Cufflinks exon178206738 178206797 . - . gene\_id "XLOC\_031692"; transcript\_id "TCONS\_00053054"; exon\_number "5";  
oId "CUFF.54632.11"; tss\_id "TSS39989";  
chr2 Cufflinks exon178177014 178186965 . - . gene\_id "XLOC\_031692"; transcript\_id "TCONS\_00053057"; exon\_number "1";  
oId "CUFF.54632.14"; tss\_id "TSS39990";  
chr2 Cufflinks exon178187967 178188124 . - . gene\_id "XLOC\_031692"; transcript\_id "TCONS\_00053057"; exon\_number "2";  
oId "CUFF.54632.14"; tss\_id "TSS39990";  
chr2 Cufflinks exon178196300 178196384 . - . gene\_id "XLOC\_031692"; transcript\_id "TCONS\_00053057"; exon\_number "3";  
oId "CUFF.54632.14"; tss\_id "TSS39990";  
chr2 Cufflinks exon178196870 178196979 . - . gene\_id "XLOC\_031692"; transcript\_id "TCONS\_00053057"; exon\_number "4";  
oId "CUFF.54632.14"; tss\_id "TSS39990";  
chr2 Cufflinks exon178199121 178199257 . - . gene\_id "XLOC\_031692"; transcript\_id "TCONS\_00053057"; exon\_number "5";  
oId "CUFF.54632.14"; tss\_id "TSS39990";

|                                         |           |   |   |   |                                                                         |
|-----------------------------------------|-----------|---|---|---|-------------------------------------------------------------------------|
| chr2 Cufflinks exon178203326            | 178203427 | . | - | . | gene_id "XLOC_031692"; transcript_id "TCONS_00053057"; exon_number "6"; |
| oId "CUFF.54632.14"; tss_id "TSS39990"; |           |   |   |   |                                                                         |
| chr2 Cufflinks exon178257301            | 178257419 | . | - | . | gene_id "XLOC_031692"; transcript_id "TCONS_00053057"; exon_number "7"; |
| oId "CUFF.54632.14"; tss_id "TSS39990"; |           |   |   |   |                                                                         |
| chr2 Cufflinks exon178177014            | 178185117 | . | - | . | gene_id "XLOC_031692"; transcript_id "TCONS_00053056"; exon_number "1"; |
| oId "CUFF.54632.13"; tss_id "TSS39990"; |           |   |   |   |                                                                         |
| chr2 Cufflinks exon178187623            | 178187706 | . | - | . | gene_id "XLOC_031692"; transcript_id "TCONS_00053056"; exon_number "2"; |
| oId "CUFF.54632.13"; tss_id "TSS39990"; |           |   |   |   |                                                                         |
| chr2 Cufflinks exon178188038            | 178188124 | . | - | . | gene_id "XLOC_031692"; transcript_id "TCONS_00053056"; exon_number "3"; |
| oId "CUFF.54632.13"; tss_id "TSS39990"; |           |   |   |   |                                                                         |
| chr2 Cufflinks exon178199121            | 178199257 | . | - | . | gene_id "XLOC_031692"; transcript_id "TCONS_00053056"; exon_number "4"; |
| oId "CUFF.54632.13"; tss_id "TSS39990"; |           |   |   |   |                                                                         |
| chr2 Cufflinks exon178203350            | 178203427 | . | - | . | gene_id "XLOC_031692"; transcript_id "TCONS_00053056"; exon_number "5"; |
| oId "CUFF.54632.13"; tss_id "TSS39990"; |           |   |   |   |                                                                         |
| chr2 Cufflinks exon178257301            | 178257419 | . | - | . | gene_id "XLOC_031692"; transcript_id "TCONS_00053056"; exon_number "6"; |
| oId "CUFF.54632.13"; tss_id "TSS39990"; |           |   |   |   |                                                                         |
| chr2 Cufflinks exon178177014            | 178186965 | . | - | . | gene_id "XLOC_031692"; transcript_id "TCONS_00053055"; exon_number "1"; |
| oId "CUFF.54632.12"; tss_id "TSS39990"; |           |   |   |   |                                                                         |
| chr2 Cufflinks exon178187813            | 178188124 | . | - | . | gene_id "XLOC_031692"; transcript_id "TCONS_00053055"; exon_number "2"; |
| oId "CUFF.54632.12"; tss_id "TSS39990"; |           |   |   |   |                                                                         |
| chr2 Cufflinks exon178196300            | 178196384 | . | - | . | gene_id "XLOC_031692"; transcript_id "TCONS_00053055"; exon_number "3"; |
| oId "CUFF.54632.12"; tss_id "TSS39990"; |           |   |   |   |                                                                         |
| chr2 Cufflinks exon178196870            | 178196979 | . | - | . | gene_id "XLOC_031692"; transcript_id "TCONS_00053055"; exon_number "4"; |
| oId "CUFF.54632.12"; tss_id "TSS39990"; |           |   |   |   |                                                                         |
| chr2 Cufflinks exon178199121            | 178199257 | . | - | . | gene_id "XLOC_031692"; transcript_id "TCONS_00053055"; exon_number "5"; |
| oId "CUFF.54632.12"; tss_id "TSS39990"; |           |   |   |   |                                                                         |
| chr2 Cufflinks exon178203326            | 178203427 | . | - | . | gene_id "XLOC_031692"; transcript_id "TCONS_00053055"; exon_number "6"; |
| oId "CUFF.54632.12"; tss_id "TSS39990"; |           |   |   |   |                                                                         |
| chr2 Cufflinks exon178257301            | 178257419 | . | - | . | gene_id "XLOC_031692"; transcript_id "TCONS_00053055"; exon_number "7"; |
| oId "CUFF.54632.12"; tss_id "TSS39990"; |           |   |   |   |                                                                         |
| chr2 Cufflinks exon178177014            | 178186965 | . | - | . | gene_id "XLOC_031692"; transcript_id "TCONS_00053058"; exon_number "1"; |
| oId "CUFF.54632.16"; tss_id "TSS39990"; |           |   |   |   |                                                                         |
| chr2 Cufflinks exon178187967            | 178188124 | . | - | . | gene_id "XLOC_031692"; transcript_id "TCONS_00053058"; exon_number "2"; |
| oId "CUFF.54632.16"; tss_id "TSS39990"; |           |   |   |   |                                                                         |
| chr2 Cufflinks exon178199121            | 178199257 | . | - | . | gene_id "XLOC_031692"; transcript_id "TCONS_00053058"; exon_number "3"; |
| oId "CUFF.54632.16"; tss_id "TSS39990"; |           |   |   |   |                                                                         |
| chr2 Cufflinks exon178203326            | 178203427 | . | - | . | gene_id "XLOC_031692"; transcript_id "TCONS_00053058"; exon_number "4"; |
| oId "CUFF.54632.16"; tss_id "TSS39990"; |           |   |   |   |                                                                         |
| chr2 Cufflinks exon178257301            | 178257428 | . | - | . | gene_id "XLOC_031692"; transcript_id "TCONS_00053058"; exon_number "5"; |
| oId "CUFF.54632.16"; tss_id "TSS39990"; |           |   |   |   |                                                                         |
| chr2 Cufflinks exon178177014            | 178186965 | . | - | . | gene_id "XLOC_031692"; transcript_id "TCONS_00053059"; exon_number "1"; |
| oId "CUFF.54632.15"; tss_id "TSS39990"; |           |   |   |   |                                                                         |
| chr2 Cufflinks exon178188032            | 178188124 | . | - | . | gene_id "XLOC_031692"; transcript_id "TCONS_00053059"; exon_number "2"; |

oId "CUFF.54632.15"; tss\_id "TSS39990";  
chr2 Cufflinks exon178199121 178199257 . - . gene\_id "XLOC\_031692"; transcript\_id "TCONS\_00053059"; exon\_number "3";  
oId "CUFF.54632.15"; tss\_id "TSS39990";  
chr2 Cufflinks exon178203326 178203427 . - . gene\_id "XLOC\_031692"; transcript\_id "TCONS\_00053059"; exon\_number "4";  
oId "CUFF.54632.15"; tss\_id "TSS39990";  
chr2 Cufflinks exon178257301 178257445 . - . gene\_id "XLOC\_031692"; transcript\_id "TCONS\_00053059"; exon\_number "5";  
oId "CUFF.54632.15"; tss\_id "TSS39990";  
chr2 Cufflinks exon186895700 186898529 . - . gene\_id "XLOC\_031757"; transcript\_id "TCONS\_00053139"; exon\_number "1";  
oId "CUFF.54933.3"; tss\_id "TSS40066";  
chr2 Cufflinks exon186903058 186903162 . - . gene\_id "XLOC\_031757"; transcript\_id "TCONS\_00053139"; exon\_number "2";  
oId "CUFF.54933.3"; tss\_id "TSS40066";  
chr2 Cufflinks exon186904227 186904282 . - . gene\_id "XLOC\_031757"; transcript\_id "TCONS\_00053139"; exon\_number "3";  
oId "CUFF.54933.3"; tss\_id "TSS40066";  
chr2 Cufflinks exon186946057 186946143 . - . gene\_id "XLOC\_031757"; transcript\_id "TCONS\_00053139"; exon\_number "4";  
oId "CUFF.54933.3"; tss\_id "TSS40066";  
chr2 Cufflinks exon186947881 186947948 . - . gene\_id "XLOC\_031757"; transcript\_id "TCONS\_00053139"; exon\_number "5";  
oId "CUFF.54933.3"; tss\_id "TSS40066";  
chr2 Cufflinks exon186951028 186951044 . - . gene\_id "XLOC\_031757"; transcript\_id "TCONS\_00053139"; exon\_number "6";  
oId "CUFF.54933.3"; tss\_id "TSS40066";  
chr2 Cufflinks exon186895700 186898529 . - . gene\_id "XLOC\_031757"; transcript\_id "TCONS\_00053140"; exon\_number "1";  
oId "CUFF.54933.4"; tss\_id "TSS40067";  
chr2 Cufflinks exon186903058 186903162 . - . gene\_id "XLOC\_031757"; transcript\_id "TCONS\_00053140"; exon\_number "2";  
oId "CUFF.54933.4"; tss\_id "TSS40067";  
chr2 Cufflinks exon186904227 186904282 . - . gene\_id "XLOC\_031757"; transcript\_id "TCONS\_00053140"; exon\_number "3";  
oId "CUFF.54933.4"; tss\_id "TSS40067";  
chr2 Cufflinks exon186946057 186946143 . - . gene\_id "XLOC\_031757"; transcript\_id "TCONS\_00053140"; exon\_number "4";  
oId "CUFF.54933.4"; tss\_id "TSS40067";  
chr2 Cufflinks exon186947881 186947951 . - . gene\_id "XLOC\_031757"; transcript\_id "TCONS\_00053140"; exon\_number "5";  
oId "CUFF.54933.4"; tss\_id "TSS40067";  
chr2 Cufflinks exon186951028 186951097 . - . gene\_id "XLOC\_031757"; transcript\_id "TCONS\_00053140"; exon\_number "6";  
oId "CUFF.54933.4"; tss\_id "TSS40067";  
chr2 Cufflinks exon187079746 187079817 . - . gene\_id "XLOC\_031757"; transcript\_id "TCONS\_00053140"; exon\_number "7";  
oId "CUFF.54933.4"; tss\_id "TSS40067";  
chr2 Cufflinks exon187321442 187321578 . - . gene\_id "XLOC\_031757"; transcript\_id "TCONS\_00053140"; exon\_number "8";  
oId "CUFF.54933.4"; tss\_id "TSS40067";  
chr2 Cufflinks exon187350527 187350863 . - . gene\_id "XLOC\_031757"; transcript\_id "TCONS\_00053140"; exon\_number "9";  
oId "CUFF.54933.4"; tss\_id "TSS40067";  
chr2 Cufflinks exon186895700 186898529 . - . gene\_id "XLOC\_031757"; transcript\_id "TCONS\_00053141"; exon\_number "1";  
oId "CUFF.54933.1"; tss\_id "TSS40067";  
chr2 Cufflinks exon186904227 186904282 . - . gene\_id "XLOC\_031757"; transcript\_id "TCONS\_00053141"; exon\_number "2";  
oId "CUFF.54933.1"; tss\_id "TSS40067";  
chr2 Cufflinks exon186946057 186946143 . - . gene\_id "XLOC\_031757"; transcript\_id "TCONS\_00053141"; exon\_number "3";  
oId "CUFF.54933.1"; tss\_id "TSS40067";

|                                        |           |   |   |   |                                                                         |
|----------------------------------------|-----------|---|---|---|-------------------------------------------------------------------------|
| chr2 Cufflinks exon186947881           | 186947948 | . | - | . | gene_id "XLOC_031757"; transcript_id "TCONS_00053141"; exon_number "4"; |
| oId "CUFF.54933.1"; tss_id "TSS40067"; |           |   |   |   |                                                                         |
| chr2 Cufflinks exon186951028           | 186951097 | . | - | . | gene_id "XLOC_031757"; transcript_id "TCONS_00053141"; exon_number "5"; |
| oId "CUFF.54933.1"; tss_id "TSS40067"; |           |   |   |   |                                                                         |
| chr2 Cufflinks exon187079746           | 187079817 | . | - | . | gene_id "XLOC_031757"; transcript_id "TCONS_00053141"; exon_number "6"; |
| oId "CUFF.54933.1"; tss_id "TSS40067"; |           |   |   |   |                                                                         |
| chr2 Cufflinks exon187283676           | 187283812 | . | - | . | gene_id "XLOC_031757"; transcript_id "TCONS_00053141"; exon_number "7"; |
| oId "CUFF.54933.1"; tss_id "TSS40067"; |           |   |   |   |                                                                         |
| chr2 Cufflinks exon187321442           | 187321578 | . | - | . | gene_id "XLOC_031757"; transcript_id "TCONS_00053141"; exon_number "8"; |
| oId "CUFF.54933.1"; tss_id "TSS40067"; |           |   |   |   |                                                                         |
| chr2 Cufflinks exon187350527           | 187350865 | . | - | . | gene_id "XLOC_031757"; transcript_id "TCONS_00053141"; exon_number "9"; |
| oId "CUFF.54933.1"; tss_id "TSS40067"; |           |   |   |   |                                                                         |
| chr2 Cufflinks exon186895700           | 186898529 | . | - | . | gene_id "XLOC_031757"; transcript_id "TCONS_00053142"; exon_number "1"; |
| oId "CUFF.54933.2"; tss_id "TSS40067"; |           |   |   |   |                                                                         |
| chr2 Cufflinks exon186903058           | 186903159 | . | - | . | gene_id "XLOC_031757"; transcript_id "TCONS_00053142"; exon_number "2"; |
| oId "CUFF.54933.2"; tss_id "TSS40067"; |           |   |   |   |                                                                         |
| chr2 Cufflinks exon186904227           | 186904282 | . | - | . | gene_id "XLOC_031757"; transcript_id "TCONS_00053142"; exon_number "3"; |
| oId "CUFF.54933.2"; tss_id "TSS40067"; |           |   |   |   |                                                                         |
| chr2 Cufflinks exon186946057           | 186946143 | . | - | . | gene_id "XLOC_031757"; transcript_id "TCONS_00053142"; exon_number "4"; |
| oId "CUFF.54933.2"; tss_id "TSS40067"; |           |   |   |   |                                                                         |
| chr2 Cufflinks exon186947881           | 186947948 | . | - | . | gene_id "XLOC_031757"; transcript_id "TCONS_00053142"; exon_number "5"; |
| oId "CUFF.54933.2"; tss_id "TSS40067"; |           |   |   |   |                                                                         |
| chr2 Cufflinks exon186951028           | 186951097 | . | - | . | gene_id "XLOC_031757"; transcript_id "TCONS_00053142"; exon_number "6"; |
| oId "CUFF.54933.2"; tss_id "TSS40067"; |           |   |   |   |                                                                         |
| chr2 Cufflinks exon187079746           | 187079817 | . | - | . | gene_id "XLOC_031757"; transcript_id "TCONS_00053142"; exon_number "7"; |
| oId "CUFF.54933.2"; tss_id "TSS40067"; |           |   |   |   |                                                                         |
| chr2 Cufflinks exon187321442           | 187321578 | . | - | . | gene_id "XLOC_031757"; transcript_id "TCONS_00053142"; exon_number "8"; |
| oId "CUFF.54933.2"; tss_id "TSS40067"; |           |   |   |   |                                                                         |
| chr2 Cufflinks exon187350527           | 187350882 | . | - | . | gene_id "XLOC_031757"; transcript_id "TCONS_00053142"; exon_number "9"; |
| oId "CUFF.54933.2"; tss_id "TSS40067"; |           |   |   |   |                                                                         |
| chr2 Cufflinks exon186945462           | 186945504 | . | - | . | gene_id "XLOC_031757"; transcript_id "TCONS_00053143"; exon_number "1"; |
| oId "CUFF.54933.5"; tss_id "TSS40067"; |           |   |   |   |                                                                         |
| chr2 Cufflinks exon186946057           | 186946145 | . | - | . | gene_id "XLOC_031757"; transcript_id "TCONS_00053143"; exon_number "2"; |
| oId "CUFF.54933.5"; tss_id "TSS40067"; |           |   |   |   |                                                                         |
| chr2 Cufflinks exon186947883           | 186947948 | . | - | . | gene_id "XLOC_031757"; transcript_id "TCONS_00053143"; exon_number "3"; |
| oId "CUFF.54933.5"; tss_id "TSS40067"; |           |   |   |   |                                                                         |
| chr2 Cufflinks exon186951028           | 186951097 | . | - | . | gene_id "XLOC_031757"; transcript_id "TCONS_00053143"; exon_number "4"; |
| oId "CUFF.54933.5"; tss_id "TSS40067"; |           |   |   |   |                                                                         |
| chr2 Cufflinks exon187079746           | 187079817 | . | - | . | gene_id "XLOC_031757"; transcript_id "TCONS_00053143"; exon_number "5"; |
| oId "CUFF.54933.5"; tss_id "TSS40067"; |           |   |   |   |                                                                         |
| chr2 Cufflinks exon187321442           | 187321578 | . | - | . | gene_id "XLOC_031757"; transcript_id "TCONS_00053143"; exon_number "6"; |
| oId "CUFF.54933.5"; tss_id "TSS40067"; |           |   |   |   |                                                                         |
| chr2 Cufflinks exon187350527           | 187350865 | . | - | . | gene_id "XLOC_031757"; transcript_id "TCONS_00053143"; exon_number "7"; |

oId "CUFF.54933.5"; tss\_id "TSS40067";  
chr2 Cufflinks exon187211753 187211819 . - . gene\_id "XLOC\_031757"; transcript\_id "TCONS\_00053177"; exon\_number "1";  
oId "CUFF.54933.11"; tss\_id "TSS40067";  
chr2 Cufflinks exon187321447 187321578 . - . gene\_id "XLOC\_031757"; transcript\_id "TCONS\_00053177"; exon\_number "2";  
oId "CUFF.54933.11"; tss\_id "TSS40067";  
chr2 Cufflinks exon187350527 187350863 . - . gene\_id "XLOC\_031757"; transcript\_id "TCONS\_00053177"; exon\_number "3";  
oId "CUFF.54933.11"; tss\_id "TSS40067";  
chr2 Cufflinks exon187226244 187229856 . - . gene\_id "XLOC\_031757"; transcript\_id "TCONS\_00053182"; exon\_number "1";  
oId "CUFF.54933.12"; tss\_id "TSS40067";  
chr2 Cufflinks exon187283676 187283812 . - . gene\_id "XLOC\_031757"; transcript\_id "TCONS\_00053182"; exon\_number "2";  
oId "CUFF.54933.12"; tss\_id "TSS40067";  
chr2 Cufflinks exon187321442 187321578 . - . gene\_id "XLOC\_031757"; transcript\_id "TCONS\_00053182"; exon\_number "3";  
oId "CUFF.54933.12"; tss\_id "TSS40067";  
chr2 Cufflinks exon187350527 187350873 . - . gene\_id "XLOC\_031757"; transcript\_id "TCONS\_00053182"; exon\_number "4";  
oId "CUFF.54933.12"; tss\_id "TSS40067";  
chr2 Cufflinks exon187226244 187229856 . - . gene\_id "XLOC\_031757"; transcript\_id "TCONS\_00053183"; exon\_number "1";  
oId "CUFF.54933.13"; tss\_id "TSS40067";  
chr2 Cufflinks exon187321442 187321578 . - . gene\_id "XLOC\_031757"; transcript\_id "TCONS\_00053183"; exon\_number "2";  
oId "CUFF.54933.13"; tss\_id "TSS40067";  
chr2 Cufflinks exon187350527 187350882 . - . gene\_id "XLOC\_031757"; transcript\_id "TCONS\_00053183"; exon\_number "3";  
oId "CUFF.54933.13"; tss\_id "TSS40067";  
chr2 Cufflinks exon187234150 187234324 . - . gene\_id "XLOC\_031757"; transcript\_id "TCONS\_00053186"; exon\_number "1";  
oId "CUFF.54933.14"; tss\_id "TSS40067";  
chr2 Cufflinks exon187321442 187321578 . - . gene\_id "XLOC\_031757"; transcript\_id "TCONS\_00053186"; exon\_number "2";  
oId "CUFF.54933.14"; tss\_id "TSS40067";  
chr2 Cufflinks exon187350527 187350884 . - . gene\_id "XLOC\_031757"; transcript\_id "TCONS\_00053186"; exon\_number "3";  
oId "CUFF.54933.14"; tss\_id "TSS40067";  
chr2 Cufflinks exon187208991 187209366 . - . gene\_id "XLOC\_031789"; transcript\_id "TCONS\_00053175"; exon\_number "1";  
oId "CUFF.55037.1"; tss\_id "TSS40099";  
chr2 Cufflinks exon187281710 187282793 . - . gene\_id "XLOC\_031789"; transcript\_id "TCONS\_00053175"; exon\_number "2";  
oId "CUFF.55037.1"; tss\_id "TSS40099";  
chr2 Cufflinks exon189463097 189463584 . - . gene\_id "XLOC\_031819"; transcript\_id "TCONS\_00053219"; exon\_number "1";  
oId "CUFF.55125.1"; tss\_id "TSS40130";  
chr2 Cufflinks exon189464027 189464345 . - . gene\_id "XLOC\_031819"; transcript\_id "TCONS\_00053219"; exon\_number "2";  
oId "CUFF.55125.1"; tss\_id "TSS40130";  
chr2 Cufflinks exon189463097 189463584 . - . gene\_id "XLOC\_031819"; transcript\_id "TCONS\_00053220"; exon\_number "1";  
oId "CUFF.55125.2"; tss\_id "TSS40131";  
chr2 Cufflinks exon189464027 189464065 . - . gene\_id "XLOC\_031819"; transcript\_id "TCONS\_00053220"; exon\_number "2";  
oId "CUFF.55125.2"; tss\_id "TSS40131";  
chr2 Cufflinks exon189465272 189465340 . - . gene\_id "XLOC\_031819"; transcript\_id "TCONS\_00053220"; exon\_number "3";  
oId "CUFF.55125.2"; tss\_id "TSS40131";  
chr2 Cufflinks exon189464691 189465336 . - . gene\_id "XLOC\_031819"; transcript\_id "TCONS\_00053221"; exon\_number "1";  
oId "CUFF.55125.3"; tss\_id "TSS40132";

|                                         |           |   |   |   |                                                                         |
|-----------------------------------------|-----------|---|---|---|-------------------------------------------------------------------------|
| chr2 Cufflinks exon189468387            | 189468484 | . | - | . | gene_id "XLOC_031819"; transcript_id "TCONS_00053221"; exon_number "2"; |
| oId "CUFF.55125.3"; tss_id "TSS40132";  |           |   |   |   |                                                                         |
| chr2 Cufflinks exon189470395            | 189470753 | . | - | . | gene_id "XLOC_031819"; transcript_id "TCONS_00053221"; exon_number "3"; |
| oId "CUFF.55125.3"; tss_id "TSS40132";  |           |   |   |   |                                                                         |
| chr2 Cufflinks exon194745425            | 194747068 | . | - | . | gene_id "XLOC_031882"; transcript_id "TCONS_00053314"; exon_number "1"; |
| oId "CUFF.55339.1"; tss_id "TSS40215";  |           |   |   |   |                                                                         |
| chr2 Cufflinks exon194753317            | 194753345 | . | - | . | gene_id "XLOC_031882"; transcript_id "TCONS_00053314"; exon_number "2"; |
| oId "CUFF.55339.1"; tss_id "TSS40215";  |           |   |   |   |                                                                         |
| chr2 Cufflinks exon194753436            | 194753463 | . | - | . | gene_id "XLOC_031882"; transcript_id "TCONS_00053314"; exon_number "3"; |
| oId "CUFF.55339.1"; tss_id "TSS40215";  |           |   |   |   |                                                                         |
| chr2 Cufflinks exon194745425            | 194747068 | . | - | . | gene_id "XLOC_031882"; transcript_id "TCONS_00053315"; exon_number "1"; |
| oId "CUFF.55339.2"; tss_id "TSS40216";  |           |   |   |   |                                                                         |
| chr2 Cufflinks exon194753317            | 194753345 | . | - | . | gene_id "XLOC_031882"; transcript_id "TCONS_00053315"; exon_number "2"; |
| oId "CUFF.55339.2"; tss_id "TSS40216";  |           |   |   |   |                                                                         |
| chr2 Cufflinks exon194755826            | 194755928 | . | - | . | gene_id "XLOC_031882"; transcript_id "TCONS_00053315"; exon_number "3"; |
| oId "CUFF.55339.2"; tss_id "TSS40216";  |           |   |   |   |                                                                         |
| chr2 Cufflinks exon194745425            | 194747068 | . | - | . | gene_id "XLOC_031882"; transcript_id "TCONS_00053316"; exon_number "1"; |
| oId "CUFF.55339.3"; tss_id "TSS40217";  |           |   |   |   |                                                                         |
| chr2 Cufflinks exon194753317            | 194753345 | . | - | . | gene_id "XLOC_031882"; transcript_id "TCONS_00053316"; exon_number "2"; |
| oId "CUFF.55339.3"; tss_id "TSS40217";  |           |   |   |   |                                                                         |
| chr2 Cufflinks exon194758602            | 194759240 | . | - | . | gene_id "XLOC_031882"; transcript_id "TCONS_00053316"; exon_number "3"; |
| oId "CUFF.55339.3"; tss_id "TSS40217";  |           |   |   |   |                                                                         |
| chr2 Cufflinks exon196314848            | 196316645 | . | - | . | gene_id "XLOC_031883"; transcript_id "TCONS_00053317"; exon_number "1"; |
| oId "CUFF.55350.3"; tss_id "TSS40218";  |           |   |   |   |                                                                         |
| chr2 Cufflinks exon196387727            | 196388233 | . | - | . | gene_id "XLOC_031883"; transcript_id "TCONS_00053317"; exon_number "2"; |
| oId "CUFF.55350.3"; tss_id "TSS40218";  |           |   |   |   |                                                                         |
| chr2 Cufflinks exon208050883            | 208051712 | . | - | . | gene_id "XLOC_031986"; transcript_id "TCONS_00053515"; exon_number "1"; |
| oId "CUFF.55884.9"; tss_id "TSS40368";  |           |   |   |   |                                                                         |
| chr2 Cufflinks exon208100213            | 208100327 | . | - | . | gene_id "XLOC_031986"; transcript_id "TCONS_00053515"; exon_number "2"; |
| oId "CUFF.55884.9"; tss_id "TSS40368";  |           |   |   |   |                                                                         |
| chr2 Cufflinks exon208102544            | 208102655 | . | - | . | gene_id "XLOC_031986"; transcript_id "TCONS_00053515"; exon_number "3"; |
| oId "CUFF.55884.9"; tss_id "TSS40368";  |           |   |   |   |                                                                         |
| chr2 Cufflinks exon208105001            | 208105062 | . | - | . | gene_id "XLOC_031986"; transcript_id "TCONS_00053515"; exon_number "4"; |
| oId "CUFF.55884.9"; tss_id "TSS40368";  |           |   |   |   |                                                                         |
| chr2 Cufflinks exon208118913            | 208119040 | . | - | . | gene_id "XLOC_031986"; transcript_id "TCONS_00053515"; exon_number "5"; |
| oId "CUFF.55884.9"; tss_id "TSS40368";  |           |   |   |   |                                                                         |
| chr2 Cufflinks exon208050883            | 208051712 | . | - | . | gene_id "XLOC_031986"; transcript_id "TCONS_00053514"; exon_number "1"; |
| oId "CUFF.55884.12"; tss_id "TSS40368"; |           |   |   |   |                                                                         |
| chr2 Cufflinks exon208102544            | 208102655 | . | - | . | gene_id "XLOC_031986"; transcript_id "TCONS_00053514"; exon_number "2"; |
| oId "CUFF.55884.12"; tss_id "TSS40368"; |           |   |   |   |                                                                         |
| chr2 Cufflinks exon208105001            | 208105062 | . | - | . | gene_id "XLOC_031986"; transcript_id "TCONS_00053514"; exon_number "3"; |
| oId "CUFF.55884.12"; tss_id "TSS40368"; |           |   |   |   |                                                                         |
| chr2 Cufflinks exon208118913            | 208119040 | . | - | . | gene_id "XLOC_031986"; transcript_id "TCONS_00053514"; exon_number "4"; |

oId "CUFF.55884.12"; tss\_id "TSS40368";  
chr2 Cufflinks exon208050883 208051712 . - . gene\_id "XLOC\_031986"; transcript\_id "TCONS\_00053516"; exon\_number "1";  
oId "CUFF.55884.14"; tss\_id "TSS40369";  
chr2 Cufflinks exon208100213 208100327 . - . gene\_id "XLOC\_031986"; transcript\_id "TCONS\_00053516"; exon\_number "2";  
oId "CUFF.55884.14"; tss\_id "TSS40369";  
chr2 Cufflinks exon208102544 208105062 . - . gene\_id "XLOC\_031986"; transcript\_id "TCONS\_00053516"; exon\_number "3";  
oId "CUFF.55884.14"; tss\_id "TSS40369";  
chr2 Cufflinks exon208118913 208118979 . - . gene\_id "XLOC\_031986"; transcript\_id "TCONS\_00053516"; exon\_number "4";  
oId "CUFF.55884.14"; tss\_id "TSS40369";  
chr2 Cufflinks exon208197365 208197411 . - . gene\_id "XLOC\_031986"; transcript\_id "TCONS\_00053516"; exon\_number "5";  
oId "CUFF.55884.14"; tss\_id "TSS40369";  
chr2 Cufflinks exon208050883 208051712 . - . gene\_id "XLOC\_031986"; transcript\_id "TCONS\_00053517"; exon\_number "1";  
oId "CUFF.55884.11"; tss\_id "TSS40370";  
chr2 Cufflinks exon208197365 208197419 . - . gene\_id "XLOC\_031986"; transcript\_id "TCONS\_00053517"; exon\_number "2";  
oId "CUFF.55884.11"; tss\_id "TSS40370";  
chr2 Cufflinks exon208382344 208382416 . - . gene\_id "XLOC\_031986"; transcript\_id "TCONS\_00053517"; exon\_number "3";  
oId "CUFF.55884.11"; tss\_id "TSS40370";  
chr2 Cufflinks exon208050883 208051712 . - . gene\_id "XLOC\_031986"; transcript\_id "TCONS\_00053518"; exon\_number "1";  
oId "CUFF.55884.10"; tss\_id "TSS40367";  
chr2 Cufflinks exon208102544 208102659 . - . gene\_id "XLOC\_031986"; transcript\_id "TCONS\_00053518"; exon\_number "2";  
oId "CUFF.55884.10"; tss\_id "TSS40367";  
chr2 Cufflinks exon208102812 208105062 . - . gene\_id "XLOC\_031986"; transcript\_id "TCONS\_00053518"; exon\_number "3";  
oId "CUFF.55884.10"; tss\_id "TSS40367";  
chr2 Cufflinks exon208197365 208197419 . - . gene\_id "XLOC\_031986"; transcript\_id "TCONS\_00053518"; exon\_number "4";  
oId "CUFF.55884.10"; tss\_id "TSS40367";  
chr2 Cufflinks exon208382344 208382422 . - . gene\_id "XLOC\_031986"; transcript\_id "TCONS\_00053518"; exon\_number "5";  
oId "CUFF.55884.10"; tss\_id "TSS40367";  
chr2 Cufflinks exon208393241 208393337 . - . gene\_id "XLOC\_031986"; transcript\_id "TCONS\_00053518"; exon\_number "6";  
oId "CUFF.55884.10"; tss\_id "TSS40367";  
chr2 Cufflinks exon208393437 208394487 . - . gene\_id "XLOC\_031986"; transcript\_id "TCONS\_00053518"; exon\_number "7";  
oId "CUFF.55884.10"; tss\_id "TSS40367";  
chr2 Cufflinks exon208050883 208051712 . - . gene\_id "XLOC\_031986"; transcript\_id "TCONS\_00053519"; exon\_number "1";  
oId "CUFF.55884.13"; tss\_id "TSS40367";  
chr2 Cufflinks exon208102544 208102655 . - . gene\_id "XLOC\_031986"; transcript\_id "TCONS\_00053519"; exon\_number "2";  
oId "CUFF.55884.13"; tss\_id "TSS40367";  
chr2 Cufflinks exon208105001 208105062 . - . gene\_id "XLOC\_031986"; transcript\_id "TCONS\_00053519"; exon\_number "3";  
oId "CUFF.55884.13"; tss\_id "TSS40367";  
chr2 Cufflinks exon208197365 208197419 . - . gene\_id "XLOC\_031986"; transcript\_id "TCONS\_00053519"; exon\_number "4";  
oId "CUFF.55884.13"; tss\_id "TSS40367";  
chr2 Cufflinks exon208382344 208382422 . - . gene\_id "XLOC\_031986"; transcript\_id "TCONS\_00053519"; exon\_number "5";  
oId "CUFF.55884.13"; tss\_id "TSS40367";  
chr2 Cufflinks exon208393241 208393337 . - . gene\_id "XLOC\_031986"; transcript\_id "TCONS\_00053519"; exon\_number "6";  
oId "CUFF.55884.13"; tss\_id "TSS40367";



|                                         |           |   |   |   |                                                                         |
|-----------------------------------------|-----------|---|---|---|-------------------------------------------------------------------------|
| chr2 Cufflinks exon208394436            | 208394505 | . | - | . | gene_id "XLOC_031986"; transcript_id "TCONS_00053519"; exon_number "7"; |
| oId "CUFF.55884.13"; tss_id "TSS40367"; |           |   |   |   |                                                                         |
| chr2 Cufflinks exon208100763            | 208100790 | . | - | . | gene_id "XLOC_031986"; transcript_id "TCONS_00053520"; exon_number "1"; |
| oId "CUFF.55884.15"; tss_id "TSS40371"; |           |   |   |   |                                                                         |
| chr2 Cufflinks exon208102544            | 208105062 | . | - | . | gene_id "XLOC_031986"; transcript_id "TCONS_00053520"; exon_number "2"; |
| oId "CUFF.55884.15"; tss_id "TSS40371"; |           |   |   |   |                                                                         |
| chr2 Cufflinks exon208190336            | 208190361 | . | - | . | gene_id "XLOC_031986"; transcript_id "TCONS_00053520"; exon_number "3"; |
| oId "CUFF.55884.15"; tss_id "TSS40371"; |           |   |   |   |                                                                         |
| chr2 Cufflinks exon208103041            | 208105062 | . | - | . | gene_id "XLOC_031986"; transcript_id "TCONS_00053521"; exon_number "1"; |
| oId "CUFF.55884.16"; tss_id "TSS40367"; |           |   |   |   |                                                                         |
| chr2 Cufflinks exon208197365            | 208197419 | . | - | . | gene_id "XLOC_031986"; transcript_id "TCONS_00053521"; exon_number "2"; |
| oId "CUFF.55884.16"; tss_id "TSS40367"; |           |   |   |   |                                                                         |
| chr2 Cufflinks exon208382344            | 208382422 | . | - | . | gene_id "XLOC_031986"; transcript_id "TCONS_00053521"; exon_number "3"; |
| oId "CUFF.55884.16"; tss_id "TSS40367"; |           |   |   |   |                                                                         |
| chr2 Cufflinks exon208393241            | 208393337 | . | - | . | gene_id "XLOC_031986"; transcript_id "TCONS_00053521"; exon_number "4"; |
| oId "CUFF.55884.16"; tss_id "TSS40367"; |           |   |   |   |                                                                         |
| chr2 Cufflinks exon208394160            | 208394510 | . | - | . | gene_id "XLOC_031986"; transcript_id "TCONS_00053521"; exon_number "5"; |
| oId "CUFF.55884.16"; tss_id "TSS40367"; |           |   |   |   |                                                                         |
| chr2 Cufflinks exon213436591            | 213437440 | . | - | . | gene_id "XLOC_032028"; transcript_id "TCONS_00053574"; exon_number "1"; |
| oId "CUFF.55992.1"; tss_id "TSS40419";  |           |   |   |   |                                                                         |
| chr2 Cufflinks exon213446082            | 213446132 | . | - | . | gene_id "XLOC_032028"; transcript_id "TCONS_00053574"; exon_number "2"; |
| oId "CUFF.55992.1"; tss_id "TSS40419";  |           |   |   |   |                                                                         |
| chr2 Cufflinks exon213573269            | 213573370 | . | - | . | gene_id "XLOC_032028"; transcript_id "TCONS_00053574"; exon_number "3"; |
| oId "CUFF.55992.1"; tss_id "TSS40419";  |           |   |   |   |                                                                         |
| chr2 Cufflinks exon213586847            | 213586901 | . | - | . | gene_id "XLOC_032034"; transcript_id "TCONS_00053581"; exon_number "1"; |
| oId "CUFF.56004.1"; tss_id "TSS40426";  |           |   |   |   |                                                                         |
| chr2 Cufflinks exon213800666            | 213800760 | . | - | . | gene_id "XLOC_032034"; transcript_id "TCONS_00053581"; exon_number "2"; |
| oId "CUFF.56004.1"; tss_id "TSS40426";  |           |   |   |   |                                                                         |
| chr2 Cufflinks exon213806226            | 213806870 | . | - | . | gene_id "XLOC_032034"; transcript_id "TCONS_00053581"; exon_number "3"; |
| oId "CUFF.56004.1"; tss_id "TSS40426";  |           |   |   |   |                                                                         |
| chr2 Cufflinks exon213761664            | 213761767 | . | - | . | gene_id "XLOC_032034"; transcript_id "TCONS_00053610"; exon_number "1"; |
| oId "CUFF.56004.2"; tss_id "TSS40427";  |           |   |   |   |                                                                         |
| chr2 Cufflinks exon213768105            | 213768167 | . | - | . | gene_id "XLOC_032034"; transcript_id "TCONS_00053610"; exon_number "2"; |
| oId "CUFF.56004.2"; tss_id "TSS40427";  |           |   |   |   |                                                                         |
| chr2 Cufflinks exon213808403            | 213808528 | . | - | . | gene_id "XLOC_032034"; transcript_id "TCONS_00053610"; exon_number "3"; |
| oId "CUFF.56004.2"; tss_id "TSS40427";  |           |   |   |   |                                                                         |
| chr2 Cufflinks exon213822842            | 213823624 | . | - | . | gene_id "XLOC_032034"; transcript_id "TCONS_00053610"; exon_number "4"; |
| oId "CUFF.56004.2"; tss_id "TSS40427";  |           |   |   |   |                                                                         |
| chr2 Cufflinks exon213761664            | 213761767 | . | - | . | gene_id "XLOC_032034"; transcript_id "TCONS_00053611"; exon_number "1"; |
| oId "CUFF.56004.3"; tss_id "TSS40428";  |           |   |   |   |                                                                         |
| chr2 Cufflinks exon213768105            | 213768167 | . | - | . | gene_id "XLOC_032034"; transcript_id "TCONS_00053611"; exon_number "2"; |
| oId "CUFF.56004.3"; tss_id "TSS40428";  |           |   |   |   |                                                                         |
| chr2 Cufflinks exon213808403            | 213808528 | . | - | . | gene_id "XLOC_032034"; transcript_id "TCONS_00053611"; exon_number "3"; |

oId "CUFF.56004.3"; tss\_id "TSS40428";  
chr2 Cufflinks exon213830108 213830239 . - . gene\_id "XLOC\_032034"; transcript\_id "TCONS\_00053611"; exon\_number "4";  
oId "CUFF.56004.3"; tss\_id "TSS40428";  
chr2 Cufflinks exon213837158 213837316 . - . gene\_id "XLOC\_032034"; transcript\_id "TCONS\_00053611"; exon\_number "5";  
oId "CUFF.56004.3"; tss\_id "TSS40428";  
chr2 Cufflinks exon213854499 213854610 . - . gene\_id "XLOC\_032034"; transcript\_id "TCONS\_00053611"; exon\_number "6";  
oId "CUFF.56004.3"; tss\_id "TSS40428";  
chr2 Cufflinks exon213859987 213860066 . - . gene\_id "XLOC\_032034"; transcript\_id "TCONS\_00053611"; exon\_number "7";  
oId "CUFF.56004.3"; tss\_id "TSS40428";  
chr2 Cufflinks exon213861074 213861106 . - . gene\_id "XLOC\_032034"; transcript\_id "TCONS\_00053611"; exon\_number "8";  
oId "CUFF.56004.3"; tss\_id "TSS40428";  
chr2 Cufflinks exon213768119 213768167 . - . gene\_id "XLOC\_032034"; transcript\_id "TCONS\_00053612"; exon\_number "1";  
oId "CUFF.56004.5"; tss\_id "TSS40429";  
chr2 Cufflinks exon213800666 213800897 . - . gene\_id "XLOC\_032034"; transcript\_id "TCONS\_00053612"; exon\_number "2";  
oId "CUFF.56004.5"; tss\_id "TSS40429";  
chr2 Cufflinks exon213801470 213803256 . - . gene\_id "XLOC\_032034"; transcript\_id "TCONS\_00053612"; exon\_number "3";  
oId "CUFF.56004.5"; tss\_id "TSS40429";  
chr2 Cufflinks exon213768119 213768167 . - . gene\_id "XLOC\_032034"; transcript\_id "TCONS\_00053613"; exon\_number "1";  
oId "CUFF.56004.4"; tss\_id "TSS40430";  
chr2 Cufflinks exon213800666 213800897 . - . gene\_id "XLOC\_032034"; transcript\_id "TCONS\_00053613"; exon\_number "2";  
oId "CUFF.56004.4"; tss\_id "TSS40430";  
chr2 Cufflinks exon213801470 213802442 . - . gene\_id "XLOC\_032034"; transcript\_id "TCONS\_00053613"; exon\_number "3";  
oId "CUFF.56004.4"; tss\_id "TSS40430";  
chr2 Cufflinks exon213808403 213808419 . - . gene\_id "XLOC\_032034"; transcript\_id "TCONS\_00053613"; exon\_number "4";  
oId "CUFF.56004.4"; tss\_id "TSS40430";  
chr2 Cufflinks exon213791490 213792061 . - . gene\_id "XLOC\_032034"; transcript\_id "TCONS\_00053620"; exon\_number "1";  
oId "CUFF.56004.6"; tss\_id "TSS40429";  
chr2 Cufflinks exon213800666 213800895 . - . gene\_id "XLOC\_032034"; transcript\_id "TCONS\_00053620"; exon\_number "2";  
oId "CUFF.56004.6"; tss\_id "TSS40429";  
chr2 Cufflinks exon213801471 213803256 . - . gene\_id "XLOC\_032034"; transcript\_id "TCONS\_00053620"; exon\_number "3";  
oId "CUFF.56004.6"; tss\_id "TSS40429";  
chr2 Cufflinks exon217362400 217362556 . - . gene\_id "XLOC\_032101"; transcript\_id "TCONS\_00053670"; exon\_number "1";  
oId "CUFF.56204.3"; tss\_id "TSS40507";  
chr2 Cufflinks exon217363330 217363479 . - . gene\_id "XLOC\_032101"; transcript\_id "TCONS\_00053670"; exon\_number "2";  
oId "CUFF.56204.3"; tss\_id "TSS40507";  
chr2 Cufflinks exon217422918 217423268 . - . gene\_id "XLOC\_032102"; transcript\_id "TCONS\_00053672"; exon\_number "1";  
oId "CUFF.56223.4"; tss\_id "TSS40508";  
chr2 Cufflinks exon217424208 217424349 . - . gene\_id "XLOC\_032102"; transcript\_id "TCONS\_00053672"; exon\_number "2";  
oId "CUFF.56223.4"; tss\_id "TSS40508";  
chr2 Cufflinks exon217424516 217424677 . - . gene\_id "XLOC\_032102"; transcript\_id "TCONS\_00053672"; exon\_number "3";  
oId "CUFF.56223.4"; tss\_id "TSS40508";  
chr2 Cufflinks exon217422918 217423090 . - . gene\_id "XLOC\_032102"; transcript\_id "TCONS\_00053674"; exon\_number "1";  
oId "CUFF.56223.2"; tss\_id "TSS40509";

|                                        |           |   |   |   |                                                                         |
|----------------------------------------|-----------|---|---|---|-------------------------------------------------------------------------|
| chr2 Cufflinks exon217423227           | 217423269 | . | - | . | gene_id "XLOC_032102"; transcript_id "TCONS_00053674"; exon_number "2"; |
| oId "CUFF.56223.2"; tss_id "TSS40509"; |           |   |   |   |                                                                         |
| chr2 Cufflinks exon217424208           | 217424349 | . | - | . | gene_id "XLOC_032102"; transcript_id "TCONS_00053674"; exon_number "3"; |
| oId "CUFF.56223.2"; tss_id "TSS40509"; |           |   |   |   |                                                                         |
| chr2 Cufflinks exon217424516           | 217424633 | . | - | . | gene_id "XLOC_032102"; transcript_id "TCONS_00053674"; exon_number "4"; |
| oId "CUFF.56223.2"; tss_id "TSS40509"; |           |   |   |   |                                                                         |
| chr2 Cufflinks exon217427053           | 217427155 | . | - | . | gene_id "XLOC_032102"; transcript_id "TCONS_00053674"; exon_number "5"; |
| oId "CUFF.56223.2"; tss_id "TSS40509"; |           |   |   |   |                                                                         |
| chr2 Cufflinks exon217436173           | 217436236 | . | - | . | gene_id "XLOC_032102"; transcript_id "TCONS_00053674"; exon_number "6"; |
| oId "CUFF.56223.2"; tss_id "TSS40509"; |           |   |   |   |                                                                         |
| chr2 Cufflinks exon217441391           | 217441425 | . | - | . | gene_id "XLOC_032102"; transcript_id "TCONS_00053674"; exon_number "7"; |
| oId "CUFF.56223.2"; tss_id "TSS40509"; |           |   |   |   |                                                                         |
| chr2 Cufflinks exon217422918           | 217423268 | . | - | . | gene_id "XLOC_032102"; transcript_id "TCONS_00053673"; exon_number "1"; |
| oId "CUFF.56223.1"; tss_id "TSS40509"; |           |   |   |   |                                                                         |
| chr2 Cufflinks exon217424208           | 217424308 | . | - | . | gene_id "XLOC_032102"; transcript_id "TCONS_00053673"; exon_number "2"; |
| oId "CUFF.56223.1"; tss_id "TSS40509"; |           |   |   |   |                                                                         |
| chr2 Cufflinks exon217436173           | 217436236 | . | - | . | gene_id "XLOC_032102"; transcript_id "TCONS_00053673"; exon_number "3"; |
| oId "CUFF.56223.1"; tss_id "TSS40509"; |           |   |   |   |                                                                         |
| chr2 Cufflinks exon217441391           | 217441425 | . | - | . | gene_id "XLOC_032102"; transcript_id "TCONS_00053673"; exon_number "4"; |
| oId "CUFF.56223.1"; tss_id "TSS40509"; |           |   |   |   |                                                                         |
| chr2 Cufflinks exon217422918           | 217423268 | . | - | . | gene_id "XLOC_032102"; transcript_id "TCONS_00053675"; exon_number "1"; |
| oId "CUFF.56223.3"; tss_id "TSS40510"; |           |   |   |   |                                                                         |
| chr2 Cufflinks exon217424208           | 217424349 | . | - | . | gene_id "XLOC_032102"; transcript_id "TCONS_00053675"; exon_number "2"; |
| oId "CUFF.56223.3"; tss_id "TSS40510"; |           |   |   |   |                                                                         |
| chr2 Cufflinks exon217436173           | 217436234 | . | - | . | gene_id "XLOC_032102"; transcript_id "TCONS_00053675"; exon_number "3"; |
| oId "CUFF.56223.3"; tss_id "TSS40510"; |           |   |   |   |                                                                         |
| chr2 Cufflinks exon217441389           | 217441675 | . | - | . | gene_id "XLOC_032102"; transcript_id "TCONS_00053675"; exon_number "4"; |
| oId "CUFF.56223.3"; tss_id "TSS40510"; |           |   |   |   |                                                                         |
| chr2 Cufflinks exon217441758           | 217441816 | . | - | . | gene_id "XLOC_032102"; transcript_id "TCONS_00053675"; exon_number "5"; |
| oId "CUFF.56223.3"; tss_id "TSS40510"; |           |   |   |   |                                                                         |
| chr2 Cufflinks exon218524914           | 218525466 | . | - | . | gene_id "XLOC_032111"; transcript_id "TCONS_00053687"; exon_number "1"; |
| oId "CUFF.56253.1"; tss_id "TSS40520"; |           |   |   |   |                                                                         |
| chr2 Cufflinks exon218647229           | 218647344 | . | - | . | gene_id "XLOC_032111"; transcript_id "TCONS_00053687"; exon_number "2"; |
| oId "CUFF.56253.1"; tss_id "TSS40520"; |           |   |   |   |                                                                         |
| chr2 Cufflinks exon218657491           | 218657606 | . | - | . | gene_id "XLOC_032111"; transcript_id "TCONS_00053687"; exon_number "3"; |
| oId "CUFF.56253.1"; tss_id "TSS40520"; |           |   |   |   |                                                                         |
| chr2 Cufflinks exon218661354           | 218661393 | . | - | . | gene_id "XLOC_032111"; transcript_id "TCONS_00053687"; exon_number "4"; |
| oId "CUFF.56253.1"; tss_id "TSS40520"; |           |   |   |   |                                                                         |
| chr2 Cufflinks exon218653253           | 218653311 | . | - | . | gene_id "XLOC_032111"; transcript_id "TCONS_00053691"; exon_number "1"; |
| oId "CUFF.56253.2"; tss_id "TSS40521"; |           |   |   |   |                                                                         |
| chr2 Cufflinks exon218653971           | 218654137 | . | - | . | gene_id "XLOC_032111"; transcript_id "TCONS_00053691"; exon_number "2"; |
| oId "CUFF.56253.2"; tss_id "TSS40521"; |           |   |   |   |                                                                         |
| chr2 Cufflinks exon218654627           | 218655165 | . | - | . | gene_id "XLOC_032111"; transcript_id "TCONS_00053691"; exon_number "3"; |

oId "CUFF.56253.2"; tss\_id "TSS40521";  
chr2 Cufflinks exon218653253 218653311 . - . gene\_id "XLOC\_032111"; transcript\_id "TCONS\_00053692"; exon\_number "1";  
oId "CUFF.56253.3"; tss\_id "TSS40522";  
chr2 Cufflinks exon218653971 218654137 . - . gene\_id "XLOC\_032111"; transcript\_id "TCONS\_00053692"; exon\_number "2";  
oId "CUFF.56253.3"; tss\_id "TSS40522";  
chr2 Cufflinks exon218654627 218654918 . - . gene\_id "XLOC\_032111"; transcript\_id "TCONS\_00053692"; exon\_number "3";  
oId "CUFF.56253.3"; tss\_id "TSS40522";  
chr2 Cufflinks exon218657491 218657606 . - . gene\_id "XLOC\_032111"; transcript\_id "TCONS\_00053692"; exon\_number "4";  
oId "CUFF.56253.3"; tss\_id "TSS40522";  
chr2 Cufflinks exon218658372 218658501 . - . gene\_id "XLOC\_032111"; transcript\_id "TCONS\_00053692"; exon\_number "5";  
oId "CUFF.56253.3"; tss\_id "TSS40522";  
chr2 Cufflinks exon218662329 218662433 . - . gene\_id "XLOC\_032111"; transcript\_id "TCONS\_00053692"; exon\_number "6";  
oId "CUFF.56253.3"; tss\_id "TSS40522";  
chr2 Cufflinks exon219080740 219081485 . - . gene\_id "XLOC\_032122"; transcript\_id "TCONS\_00053706"; exon\_number "1";  
oId "CUFF.56274.1"; tss\_id "TSS40535";  
chr2 Cufflinks exon219081751 219081781 . - . gene\_id "XLOC\_032122"; transcript\_id "TCONS\_00053706"; exon\_number "2";  
oId "CUFF.56274.1"; tss\_id "TSS40535";  
chr2 Cufflinks exon231519224 231519675 . - . gene\_id "XLOC\_032218"; transcript\_id "TCONS\_00053883"; exon\_number "1";  
oId "CUFF.56565.4"; tss\_id "TSS40661";  
chr2 Cufflinks exon231519777 231521037 . - . gene\_id "XLOC\_032218"; transcript\_id "TCONS\_00053883"; exon\_number "2";  
oId "CUFF.56565.4"; tss\_id "TSS40661";  
chr2 Cufflinks exon231522197 231523788 . - . gene\_id "XLOC\_032218"; transcript\_id "TCONS\_00053883"; exon\_number "3";  
oId "CUFF.56565.4"; tss\_id "TSS40661";  
chr2 Cufflinks exon231519224 231519675 . - . gene\_id "XLOC\_032218"; transcript\_id "TCONS\_00053886"; exon\_number "1";  
oId "CUFF.56565.3"; tss\_id "TSS40662";  
chr2 Cufflinks exon231519777 231521037 . - . gene\_id "XLOC\_032218"; transcript\_id "TCONS\_00053886"; exon\_number "2";  
oId "CUFF.56565.3"; tss\_id "TSS40662";  
chr2 Cufflinks exon231522197 231522861 . - . gene\_id "XLOC\_032218"; transcript\_id "TCONS\_00053886"; exon\_number "3";  
oId "CUFF.56565.3"; tss\_id "TSS40662";  
chr2 Cufflinks exon231523984 231524594 . - . gene\_id "XLOC\_032218"; transcript\_id "TCONS\_00053886"; exon\_number "4";  
oId "CUFF.56565.3"; tss\_id "TSS40662";  
chr2 Cufflinks exon231519224 231519675 . - . gene\_id "XLOC\_032218"; transcript\_id "TCONS\_00053885"; exon\_number "1";  
oId "CUFF.56565.2"; tss\_id "TSS40662";  
chr2 Cufflinks exon231519777 231521037 . - . gene\_id "XLOC\_032218"; transcript\_id "TCONS\_00053885"; exon\_number "2";  
oId "CUFF.56565.2"; tss\_id "TSS40662";  
chr2 Cufflinks exon231521933 231522861 . - . gene\_id "XLOC\_032218"; transcript\_id "TCONS\_00053885"; exon\_number "3";  
oId "CUFF.56565.2"; tss\_id "TSS40662";  
chr2 Cufflinks exon231523930 231524594 . - . gene\_id "XLOC\_032218"; transcript\_id "TCONS\_00053885"; exon\_number "4";  
oId "CUFF.56565.2"; tss\_id "TSS40662";  
chr2 Cufflinks exon231519224 231519675 . - . gene\_id "XLOC\_032218"; transcript\_id "TCONS\_00053884"; exon\_number "1";  
oId "CUFF.56565.1"; tss\_id "TSS40662";  
chr2 Cufflinks exon231519777 231521037 . - . gene\_id "XLOC\_032218"; transcript\_id "TCONS\_00053884"; exon\_number "2";  
oId "CUFF.56565.1"; tss\_id "TSS40662";

|                                        |           |   |   |   |                                                                         |
|----------------------------------------|-----------|---|---|---|-------------------------------------------------------------------------|
| chr2 Cufflinks exon231522197           | 231522334 | . | - | . | gene_id "XLOC_032218"; transcript_id "TCONS_00053884"; exon_number "3"; |
| oId "CUFF.56565.1"; tss_id "TSS40662"; |           |   |   |   |                                                                         |
| chr2 Cufflinks exon231523984           | 231524594 | . | - | . | gene_id "XLOC_032218"; transcript_id "TCONS_00053884"; exon_number "4"; |
| oId "CUFF.56565.1"; tss_id "TSS40662"; |           |   |   |   |                                                                         |
| chr2 Cufflinks exon231521284           | 231522861 | . | - | . | gene_id "XLOC_032218"; transcript_id "TCONS_00053888"; exon_number "1"; |
| oId "CUFF.56565.6"; tss_id "TSS40663"; |           |   |   |   |                                                                         |
| chr2 Cufflinks exon231523984           | 231524136 | . | - | . | gene_id "XLOC_032218"; transcript_id "TCONS_00053888"; exon_number "2"; |
| oId "CUFF.56565.6"; tss_id "TSS40663"; |           |   |   |   |                                                                         |
| chr2 Cufflinks exon232312974           | 232313035 | . | - | . | gene_id "XLOC_032224"; transcript_id "TCONS_00053895"; exon_number "1"; |
| oId "CUFF.56595.1"; tss_id "TSS40669"; |           |   |   |   |                                                                         |
| chr2 Cufflinks exon232317830           | 232319384 | . | - | . | gene_id "XLOC_032224"; transcript_id "TCONS_00053895"; exon_number "2"; |
| oId "CUFF.56595.1"; tss_id "TSS40669"; |           |   |   |   |                                                                         |
| chr2 Cufflinks exon232341594           | 232342026 | . | - | . | gene_id "XLOC_032230"; transcript_id "TCONS_00053902"; exon_number "1"; |
| oId "CUFF.56606.1"; tss_id "TSS40676"; |           |   |   |   |                                                                         |
| chr2 Cufflinks exon232347395           | 232348990 | . | - | . | gene_id "XLOC_032230"; transcript_id "TCONS_00053902"; exon_number "2"; |
| oId "CUFF.56606.1"; tss_id "TSS40676"; |           |   |   |   |                                                                         |
| chr2 Cufflinks exon232563297           | 232565643 | . | - | . | gene_id "XLOC_032245"; transcript_id "TCONS_00053918"; exon_number "1"; |
| oId "CUFF.56638.3"; tss_id "TSS40691"; |           |   |   |   |                                                                         |
| chr2 Cufflinks exon232570630           | 232571755 | . | - | . | gene_id "XLOC_032245"; transcript_id "TCONS_00053918"; exon_number "2"; |
| oId "CUFF.56638.3"; tss_id "TSS40691"; |           |   |   |   |                                                                         |
| chr2 Cufflinks exon232563297           | 232565645 | . | - | . | gene_id "XLOC_032245"; transcript_id "TCONS_00053919"; exon_number "1"; |
| oId "CUFF.56638.2"; tss_id "TSS40692"; |           |   |   |   |                                                                         |
| chr2 Cufflinks exon232570646           | 232572274 | . | - | . | gene_id "XLOC_032245"; transcript_id "TCONS_00053919"; exon_number "2"; |
| oId "CUFF.56638.2"; tss_id "TSS40692"; |           |   |   |   |                                                                         |
| chr2 Cufflinks exon232563297           | 232565645 | . | - | . | gene_id "XLOC_032245"; transcript_id "TCONS_00053920"; exon_number "1"; |
| oId "CUFF.56638.1"; tss_id "TSS40693"; |           |   |   |   |                                                                         |
| chr2 Cufflinks exon232571634           | 232573042 | . | - | . | gene_id "XLOC_032245"; transcript_id "TCONS_00053920"; exon_number "2"; |
| oId "CUFF.56638.1"; tss_id "TSS40693"; |           |   |   |   |                                                                         |
| chr2 Cufflinks exon235351491           | 235353429 | . | - | . | gene_id "XLOC_032272"; transcript_id "TCONS_00053965"; exon_number "1"; |
| oId "CUFF.56741.1"; tss_id "TSS40727"; |           |   |   |   |                                                                         |
| chr2 Cufflinks exon235358762           | 235358875 | . | - | . | gene_id "XLOC_032272"; transcript_id "TCONS_00053965"; exon_number "2"; |
| oId "CUFF.56741.1"; tss_id "TSS40727"; |           |   |   |   |                                                                         |
| chr2 Cufflinks exon235351491           | 235353379 | . | - | . | gene_id "XLOC_032272"; transcript_id "TCONS_00053966"; exon_number "1"; |
| oId "CUFF.56741.7"; tss_id "TSS40728"; |           |   |   |   |                                                                         |
| chr2 Cufflinks exon235354796           | 235359320 | . | - | . | gene_id "XLOC_032272"; transcript_id "TCONS_00053966"; exon_number "2"; |
| oId "CUFF.56741.7"; tss_id "TSS40728"; |           |   |   |   |                                                                         |
| chr2 Cufflinks exon235351491           | 235356429 | . | - | . | gene_id "XLOC_032272"; transcript_id "TCONS_00053967"; exon_number "1"; |
| oId "CUFF.56741.2"; tss_id "TSS40729"; |           |   |   |   |                                                                         |
| chr2 Cufflinks exon235363129           | 235363241 | . | - | . | gene_id "XLOC_032272"; transcript_id "TCONS_00053967"; exon_number "2"; |
| oId "CUFF.56741.2"; tss_id "TSS40729"; |           |   |   |   |                                                                         |
| chr2 Cufflinks exon235351491           | 235359042 | . | - | . | gene_id "XLOC_032272"; transcript_id "TCONS_00053968"; exon_number "1"; |
| oId "CUFF.56741.4"; tss_id "TSS40729"; |           |   |   |   |                                                                         |
| chr2 Cufflinks exon235363129           | 235363181 | . | - | . | gene_id "XLOC_032272"; transcript_id "TCONS_00053968"; exon_number "2"; |

|                                        |   |   |   |                                                                         |  |
|----------------------------------------|---|---|---|-------------------------------------------------------------------------|--|
| oId "CUFF.56741.4"; tss_id "TSS40729"; |   |   |   |                                                                         |  |
| chr2 Cufflinks exon235363294 235363322 | . | - | . | gene_id "XLOC_032272"; transcript_id "TCONS_00053968"; exon_number "3"; |  |
| oId "CUFF.56741.4"; tss_id "TSS40729"; |   |   |   |                                                                         |  |
| chr2 Cufflinks exon235351491 235357788 | . | - | . | gene_id "XLOC_032272"; transcript_id "TCONS_00053969"; exon_number "1"; |  |
| oId "CUFF.56741.3"; tss_id "TSS40729"; |   |   |   |                                                                         |  |
| chr2 Cufflinks exon235358762 235359042 | . | - | . | gene_id "XLOC_032272"; transcript_id "TCONS_00053969"; exon_number "2"; |  |
| oId "CUFF.56741.3"; tss_id "TSS40729"; |   |   |   |                                                                         |  |
| chr2 Cufflinks exon235363129 235363335 | . | - | . | gene_id "XLOC_032272"; transcript_id "TCONS_00053969"; exon_number "3"; |  |
| oId "CUFF.56741.3"; tss_id "TSS40729"; |   |   |   |                                                                         |  |
| chr2 Cufflinks exon235351491 235353429 | . | - | . | gene_id "XLOC_032272"; transcript_id "TCONS_00053971"; exon_number "1"; |  |
| oId "CUFF.56741.6"; tss_id "TSS40729"; |   |   |   |                                                                         |  |
| chr2 Cufflinks exon235356299 235363337 | . | - | . | gene_id "XLOC_032272"; transcript_id "TCONS_00053971"; exon_number "2"; |  |
| oId "CUFF.56741.6"; tss_id "TSS40729"; |   |   |   |                                                                         |  |
| chr2 Cufflinks exon235351491 235362721 | . | - | . | gene_id "XLOC_032272"; transcript_id "TCONS_00053970"; exon_number "1"; |  |
| oId "CUFF.56741.5"; tss_id "TSS40729"; |   |   |   |                                                                         |  |
| chr2 Cufflinks exon235363129 235363337 | . | - | . | gene_id "XLOC_032272"; transcript_id "TCONS_00053970"; exon_number "2"; |  |
| oId "CUFF.56741.5"; tss_id "TSS40729"; |   |   |   |                                                                         |  |
| chr2 Cufflinks exon239330031 239330257 | . | - | . | gene_id "XLOC_032301"; transcript_id "TCONS_00054021"; exon_number "1"; |  |
| oId "CUFF.56856.1"; tss_id "TSS40763"; |   |   |   |                                                                         |  |
| chr2 Cufflinks exon239330362 239330636 | . | - | . | gene_id "XLOC_032301"; transcript_id "TCONS_00054021"; exon_number "2"; |  |
| oId "CUFF.56856.1"; tss_id "TSS40763"; |   |   |   |                                                                         |  |
| chr2 Cufflinks exon240495482 240507376 | . | - | . | gene_id "XLOC_032315"; transcript_id "TCONS_00054048"; exon_number "1"; |  |
| oId "CUFF.56899.1"; tss_id "TSS40781"; |   |   |   |                                                                         |  |
| chr2 Cufflinks exon240508363 240510690 | . | - | . | gene_id "XLOC_032315"; transcript_id "TCONS_00054048"; exon_number "2"; |  |
| oId "CUFF.56899.1"; tss_id "TSS40781"; |   |   |   |                                                                         |  |
| chr2 Cufflinks exon240873893 240877609 | . | - | . | gene_id "XLOC_032331"; transcript_id "TCONS_00054066"; exon_number "1"; |  |
| oId "CUFF.56938.1"; tss_id "TSS40799"; |   |   |   |                                                                         |  |
| chr2 Cufflinks exon240877783 240878127 | . | - | . | gene_id "XLOC_032331"; transcript_id "TCONS_00054066"; exon_number "2"; |  |
| oId "CUFF.56938.1"; tss_id "TSS40799"; |   |   |   |                                                                         |  |
| chr2 Cufflinks exon240878292 240878987 | . | - | . | gene_id "XLOC_032331"; transcript_id "TCONS_00054066"; exon_number "3"; |  |
| oId "CUFF.56938.1"; tss_id "TSS40799"; |   |   |   |                                                                         |  |
| chr2 Cufflinks exon240879089 240885068 | . | - | . | gene_id "XLOC_032332"; transcript_id "TCONS_00054068"; exon_number "1"; |  |
| oId "CUFF.56939.6"; tss_id "TSS40800"; |   |   |   |                                                                         |  |
| chr2 Cufflinks exon240887089 240888357 | . | - | . | gene_id "XLOC_032332"; transcript_id "TCONS_00054068"; exon_number "2"; |  |
| oId "CUFF.56939.6"; tss_id "TSS40800"; |   |   |   |                                                                         |  |
| chr2 Cufflinks exon240879089 240880285 | . | - | . | gene_id "XLOC_032332"; transcript_id "TCONS_00054067"; exon_number "1"; |  |
| oId "CUFF.56939.1"; tss_id "TSS40800"; |   |   |   |                                                                         |  |
| chr2 Cufflinks exon240884824 240885068 | . | - | . | gene_id "XLOC_032332"; transcript_id "TCONS_00054067"; exon_number "2"; |  |
| oId "CUFF.56939.1"; tss_id "TSS40800"; |   |   |   |                                                                         |  |
| chr2 Cufflinks exon240885989 240888357 | . | - | . | gene_id "XLOC_032332"; transcript_id "TCONS_00054067"; exon_number "3"; |  |
| oId "CUFF.56939.1"; tss_id "TSS40800"; |   |   |   |                                                                         |  |
| chr2 Cufflinks exon240879089 240884007 | . | - | . | gene_id "XLOC_032332"; transcript_id "TCONS_00054069"; exon_number "1"; |  |
| oId "CUFF.56939.7"; tss_id "TSS40801"; |   |   |   |                                                                         |  |

|                                        |           |   |   |   |                                                                             |
|----------------------------------------|-----------|---|---|---|-----------------------------------------------------------------------------|
| chr2 Cufflinks exon240884824           | 240885068 | . | - | . | gene_id "XLOC_032332"; transcript_id "TCONS_00054069"; exon_number "2";     |
| oId "CUFF.56939.7"; tss_id "TSS40801"; |           |   |   |   |                                                                             |
| chr2 Cufflinks exon240889936           | 240890429 | . | - | . | gene_id "XLOC_032332"; transcript_id "TCONS_00054069"; exon_number "3";     |
| oId "CUFF.56939.7"; tss_id "TSS40801"; |           |   |   |   |                                                                             |
| chr2 Cufflinks exon240879089           | 240880285 | . | - | . | gene_id "XLOC_032332"; transcript_id "TCONS_00054071"; exon_number "1";     |
| oId "CUFF.56939.3"; tss_id "TSS40802"; |           |   |   |   |                                                                             |
| chr2 Cufflinks exon240881621           | 240885068 | . | - | . | gene_id "XLOC_032332"; transcript_id "TCONS_00054071"; exon_number "2";     |
| oId "CUFF.56939.3"; tss_id "TSS40802"; |           |   |   |   |                                                                             |
| chr2 Cufflinks exon240889193           | 240891584 | . | - | . | gene_id "XLOC_032332"; transcript_id "TCONS_00054071"; exon_number "3";     |
| oId "CUFF.56939.3"; tss_id "TSS40802"; |           |   |   |   |                                                                             |
| chr2 Cufflinks exon240879089           | 240884007 | . | - | . | gene_id "XLOC_032332"; transcript_id "TCONS_00054070"; exon_number "1";     |
| oId "CUFF.56939.2"; tss_id "TSS40802"; |           |   |   |   |                                                                             |
| chr2 Cufflinks exon240884824           | 240885068 | . | - | . | gene_id "XLOC_032332"; transcript_id "TCONS_00054070"; exon_number "2";     |
| oId "CUFF.56939.2"; tss_id "TSS40802"; |           |   |   |   |                                                                             |
| chr2 Cufflinks exon240889193           | 240891584 | . | - | . | gene_id "XLOC_032332"; transcript_id "TCONS_00054070"; exon_number "3";     |
| oId "CUFF.56939.2"; tss_id "TSS40802"; |           |   |   |   |                                                                             |
| chr2 Cufflinks exon240879089           | 240885068 | . | - | . | gene_id "XLOC_032332"; transcript_id "TCONS_00054072"; exon_number "1";     |
| oId "CUFF.56939.5"; tss_id "TSS40803"; |           |   |   |   |                                                                             |
| chr2 Cufflinks exon240885989           | 240892621 | . | - | . | gene_id "XLOC_032332"; transcript_id "TCONS_00054072"; exon_number "2";     |
| oId "CUFF.56939.5"; tss_id "TSS40803"; |           |   |   |   |                                                                             |
| chr2 Cufflinks exon242820859           | 242820996 | . | - | . | gene_id "XLOC_032384"; transcript_id "TCONS_00054156"; exon_number "1";     |
| oId "CUFF.57103.1"; tss_id "TSS40871"; |           |   |   |   |                                                                             |
| chr2 Cufflinks exon242821057           | 242821427 | . | - | . | gene_id "XLOC_032384"; transcript_id "TCONS_00054156"; exon_number "2";     |
| oId "CUFF.57103.1"; tss_id "TSS40871"; |           |   |   |   |                                                                             |
| chr2 Cufflinks exon242823020           | 242823168 | . | - | . | gene_id "XLOC_032384"; transcript_id "TCONS_00054156"; exon_number "3";     |
| oId "CUFF.57103.1"; tss_id "TSS40871"; |           |   |   |   |                                                                             |
| chr2 Cufflinks exon242823266           | 242823431 | . | - | . | gene_id "XLOC_032384"; transcript_id "TCONS_00054156"; exon_number "4";     |
| oId "CUFF.57103.1"; tss_id "TSS40871"; |           |   |   |   |                                                                             |
| chr2 Cufflinks exon242821223           | 242821427 | . | - | . | gene_id "XLOC_032384"; transcript_id "TCONS_00054157"; exon_number "1";     |
| oId "CUFF.57103.2"; tss_id "TSS40871"; |           |   |   |   |                                                                             |
| chr2 Cufflinks exon242823010           | 242823168 | . | - | . | gene_id "XLOC_032384"; transcript_id "TCONS_00054157"; exon_number "2";     |
| oId "CUFF.57103.2"; tss_id "TSS40871"; |           |   |   |   |                                                                             |
| chr2 Cufflinks exon242823266           | 242823416 | . | - | . | gene_id "XLOC_032384"; transcript_id "TCONS_00054157"; exon_number "3";     |
| oId "CUFF.57103.2"; tss_id "TSS40871"; |           |   |   |   |                                                                             |
| chr2 Cufflinks exon242821223           | 242821429 | . | - | . | gene_id "XLOC_032384"; transcript_id "TCONS_00054158"; exon_number "1";     |
| oId "CUFF.57103.3"; tss_id "TSS40871"; |           |   |   |   |                                                                             |
| chr2 Cufflinks exon242821803           | 242821884 | . | - | . | gene_id "XLOC_032384"; transcript_id "TCONS_00054158"; exon_number "2";     |
| oId "CUFF.57103.3"; tss_id "TSS40871"; |           |   |   |   |                                                                             |
| chr2 Cufflinks exon242823020           | 242823168 | . | - | . | gene_id "XLOC_032384"; transcript_id "TCONS_00054158"; exon_number "3";     |
| oId "CUFF.57103.3"; tss_id "TSS40871"; |           |   |   |   |                                                                             |
| chr2 Cufflinks exon242823266           | 242823449 | . | - | . | gene_id "XLOC_032384"; transcript_id "TCONS_00054158"; exon_number "4";     |
| oId "CUFF.57103.3"; tss_id "TSS40871"; |           |   |   |   |                                                                             |
| chr20 Cufflinks exon4739981            | 4740014.  | + | . | . | gene_id "XLOC_032502"; transcript_id "TCONS_00054326"; exon_number "1"; oId |

|                                                                                                                       |                                                                             |
|-----------------------------------------------------------------------------------------------------------------------|-----------------------------------------------------------------------------|
| "CUFF.57536.1"; tss_id "TSS41008";<br>chr20 Cufflinks exon4744459 4745059 . + .<br>"CUFF.57536.1"; tss_id "TSS41008"; | gene_id "XLOC_032502"; transcript_id "TCONS_00054326"; exon_number "2"; oId |
| chr20 Cufflinks exon11033248 11033367 . + .<br>"1"; oId "CUFF.57654.1"; tss_id "TSS41057";                            | gene_id "XLOC_032542"; transcript_id "TCONS_00054392"; exon_number          |
| chr20 Cufflinks exon11039020 11039117 . + .<br>"2"; oId "CUFF.57654.1"; tss_id "TSS41057";                            | gene_id "XLOC_032542"; transcript_id "TCONS_00054392"; exon_number          |
| chr20 Cufflinks exon18774693 18774750 . + .<br>"1"; oId "CUFF.57904.3"; tss_id "TSS41140";                            | gene_id "XLOC_032616"; transcript_id "TCONS_00054498"; exon_number          |
| chr20 Cufflinks exon18775448 18778630 . + .<br>"2"; oId "CUFF.57904.3"; tss_id "TSS41140";                            | gene_id "XLOC_032616"; transcript_id "TCONS_00054498"; exon_number          |
| chr20 Cufflinks exon18774693 18774750 . + .<br>"1"; oId "CUFF.57904.2"; tss_id "TSS41140";                            | gene_id "XLOC_032616"; transcript_id "TCONS_00054497"; exon_number          |
| chr20 Cufflinks exon18775175 18778630 . + .<br>"2"; oId "CUFF.57904.2"; tss_id "TSS41140";                            | gene_id "XLOC_032616"; transcript_id "TCONS_00054497"; exon_number          |
| chr20 Cufflinks exon21095512 21095796 . + .<br>"1"; oId "CUFF.57919.1"; tss_id "TSS41145";                            | gene_id "XLOC_032621"; transcript_id "TCONS_00054503"; exon_number          |
| chr20 Cufflinks exon21264627 21264631 . + .<br>"2"; oId "CUFF.57919.1"; tss_id "TSS41145";                            | gene_id "XLOC_032621"; transcript_id "TCONS_00054503"; exon_number          |
| chr20 Cufflinks exon21538062 21538578 . + .<br>"1"; oId "CUFF.57934.1"; tss_id "TSS41154";                            | gene_id "XLOC_032628"; transcript_id "TCONS_00054519"; exon_number          |
| chr20 Cufflinks exon21540530 21542665 . + .<br>"2"; oId "CUFF.57934.1"; tss_id "TSS41154";                            | gene_id "XLOC_032628"; transcript_id "TCONS_00054519"; exon_number          |
| chr20 Cufflinks exon21550662 21550886 . + .<br>"1"; oId "CUFF.57935.1"; tss_id "TSS41155";                            | gene_id "XLOC_032629"; transcript_id "TCONS_00054520"; exon_number          |
| chr20 Cufflinks exon21593186 21593321 . + .<br>"2"; oId "CUFF.57935.1"; tss_id "TSS41155";                            | gene_id "XLOC_032629"; transcript_id "TCONS_00054520"; exon_number          |
| chr20 Cufflinks exon21596021 21596165 . + .<br>"3"; oId "CUFF.57935.1"; tss_id "TSS41155";                            | gene_id "XLOC_032629"; transcript_id "TCONS_00054520"; exon_number          |
| chr20 Cufflinks exon21596300 21596360 . + .<br>"4"; oId "CUFF.57935.1"; tss_id "TSS41155";                            | gene_id "XLOC_032629"; transcript_id "TCONS_00054520"; exon_number          |
| chr20 Cufflinks exon29518453 29522678 . + .<br>"1"; oId "CUFF.58174.2"; tss_id "TSS41206";                            | gene_id "XLOC_032675"; transcript_id "TCONS_00054578"; exon_number          |
| chr20 Cufflinks exon29522871 29523998 . + .<br>"2"; oId "CUFF.58174.2"; tss_id "TSS41206";                            | gene_id "XLOC_032675"; transcript_id "TCONS_00054578"; exon_number          |
| chr20 Cufflinks exon30395625 30404302 . + .<br>"1"; oId "CUFF.58217.1"; tss_id "TSS41220";                            | gene_id "XLOC_032687"; transcript_id "TCONS_00054595"; exon_number          |
| chr20 Cufflinks exon30405197 30405390 . + .<br>"2"; oId "CUFF.58217.1"; tss_id "TSS41220";                            | gene_id "XLOC_032687"; transcript_id "TCONS_00054595"; exon_number          |
| chr20 Cufflinks exon31494371 31494435 . + .<br>"1"; oId "CUFF.58307.4"; tss_id "TSS41258";                            | gene_id "XLOC_032716"; transcript_id "TCONS_00054641"; exon_number          |
| chr20 Cufflinks exon31494649 31494800 . + .<br>"2"; oId "CUFF.58307.4"; tss_id "TSS41258";                            | gene_id "XLOC_032716"; transcript_id "TCONS_00054641"; exon_number          |



|       |                |          |          |   |   |   |                                                                                                                 |
|-------|----------------|----------|----------|---|---|---|-----------------------------------------------------------------------------------------------------------------|
| chr20 | Cufflinks exon | 31496081 | 31496218 | . | + | . | gene_id "XLOC_032716"; transcript_id "TCONS_00054641"; exon_number "3"; oId "CUFF.58307.4"; tss_id "TSS41258";  |
| chr20 | Cufflinks exon | 31497627 | 31497737 | . | + | . | gene_id "XLOC_032716"; transcript_id "TCONS_00054641"; exon_number "4"; oId "CUFF.58307.4"; tss_id "TSS41258";  |
| chr20 | Cufflinks exon | 31499286 | 31499513 | . | + | . | gene_id "XLOC_032716"; transcript_id "TCONS_00054641"; exon_number "5"; oId "CUFF.58307.4"; tss_id "TSS41258";  |
| chr20 | Cufflinks exon | 31500600 | 31500670 | . | + | . | gene_id "XLOC_032716"; transcript_id "TCONS_00054641"; exon_number "6"; oId "CUFF.58307.4"; tss_id "TSS41258";  |
| chr20 | Cufflinks exon | 31505107 | 31505311 | . | + | . | gene_id "XLOC_032716"; transcript_id "TCONS_00054641"; exon_number "7"; oId "CUFF.58307.4"; tss_id "TSS41258";  |
| chr20 | Cufflinks exon | 31506168 | 31506380 | . | + | . | gene_id "XLOC_032716"; transcript_id "TCONS_00054641"; exon_number "8"; oId "CUFF.58307.4"; tss_id "TSS41258";  |
| chr20 | Cufflinks exon | 31507884 | 31508020 | . | + | . | gene_id "XLOC_032716"; transcript_id "TCONS_00054641"; exon_number "9"; oId "CUFF.58307.4"; tss_id "TSS41258";  |
| chr20 | Cufflinks exon | 31494371 | 31494435 | . | + | . | gene_id "XLOC_032716"; transcript_id "TCONS_00054642"; exon_number "1"; oId "CUFF.58307.2"; tss_id "TSS41258";  |
| chr20 | Cufflinks exon | 31494649 | 31494800 | . | + | . | gene_id "XLOC_032716"; transcript_id "TCONS_00054642"; exon_number "2"; oId "CUFF.58307.2"; tss_id "TSS41258";  |
| chr20 | Cufflinks exon | 31496081 | 31496218 | . | + | . | gene_id "XLOC_032716"; transcript_id "TCONS_00054642"; exon_number "3"; oId "CUFF.58307.2"; tss_id "TSS41258";  |
| chr20 | Cufflinks exon | 31497627 | 31497737 | . | + | . | gene_id "XLOC_032716"; transcript_id "TCONS_00054642"; exon_number "4"; oId "CUFF.58307.2"; tss_id "TSS41258";  |
| chr20 | Cufflinks exon | 31499286 | 31499513 | . | + | . | gene_id "XLOC_032716"; transcript_id "TCONS_00054642"; exon_number "5"; oId "CUFF.58307.2"; tss_id "TSS41258";  |
| chr20 | Cufflinks exon | 31505107 | 31505311 | . | + | . | gene_id "XLOC_032716"; transcript_id "TCONS_00054642"; exon_number "6"; oId "CUFF.58307.2"; tss_id "TSS41258";  |
| chr20 | Cufflinks exon | 31506168 | 31506380 | . | + | . | gene_id "XLOC_032716"; transcript_id "TCONS_00054642"; exon_number "7"; oId "CUFF.58307.2"; tss_id "TSS41258";  |
| chr20 | Cufflinks exon | 31507884 | 31508021 | . | + | . | gene_id "XLOC_032716"; transcript_id "TCONS_00054642"; exon_number "8"; oId "CUFF.58307.2"; tss_id "TSS41258";  |
| chr20 | Cufflinks exon | 31517334 | 31517426 | . | + | . | gene_id "XLOC_032716"; transcript_id "TCONS_00054642"; exon_number "9"; oId "CUFF.58307.2"; tss_id "TSS41258";  |
| chr20 | Cufflinks exon | 31518205 | 31518422 | . | + | . | gene_id "XLOC_032716"; transcript_id "TCONS_00054642"; exon_number "10"; oId "CUFF.58307.2"; tss_id "TSS41258"; |
| chr20 | Cufflinks exon | 31518984 | 31519142 | . | + | . | gene_id "XLOC_032716"; transcript_id "TCONS_00054642"; exon_number "11"; oId "CUFF.58307.2"; tss_id "TSS41258"; |
| chr20 | Cufflinks exon | 31531442 | 31531610 | . | + | . | gene_id "XLOC_032716"; transcript_id "TCONS_00054642"; exon_number "12"; oId "CUFF.58307.2"; tss_id "TSS41258"; |
| chr20 | Cufflinks exon | 31534094 | 31534296 | . | + | . | gene_id "XLOC_032716"; transcript_id "TCONS_00054642"; exon_number "13"; oId "CUFF.58307.2"; tss_id "TSS41258"; |
| chr20 | Cufflinks exon | 31494371 | 31494435 | . | + | . | gene_id "XLOC_032716"; transcript_id "TCONS_00054643"; exon_number "1"; oId "CUFF.58307.1"; tss_id "TSS41258";  |
| chr20 | Cufflinks exon | 31494649 | 31494800 | . | + | . | gene_id "XLOC_032716"; transcript_id "TCONS_00054643"; exon_number "2"; oId "CUFF.58307.1"; tss_id "TSS41258";  |

exon\_number "2"; oId "CUFF.58307.1"; tss\_id "TSS41258";  
chr20 Cufflinks exon 31496081 31496218 . + . gene\_id "XLOC\_032716"; transcript\_id "TCONS\_00054643";  
exon\_number "3"; oId "CUFF.58307.1"; tss\_id "TSS41258";  
chr20 Cufflinks exon 31497627 31497737 . + . gene\_id "XLOC\_032716"; transcript\_id "TCONS\_00054643";  
exon\_number "4"; oId "CUFF.58307.1"; tss\_id "TSS41258";  
chr20 Cufflinks exon 31499286 31499513 . + . gene\_id "XLOC\_032716"; transcript\_id "TCONS\_00054643";  
exon\_number "5"; oId "CUFF.58307.1"; tss\_id "TSS41258";  
chr20 Cufflinks exon 31505107 31505311 . + . gene\_id "XLOC\_032716"; transcript\_id "TCONS\_00054643";  
exon\_number "6"; oId "CUFF.58307.1"; tss\_id "TSS41258";  
chr20 Cufflinks exon 31506168 31506380 . + . gene\_id "XLOC\_032716"; transcript\_id "TCONS\_00054643";  
exon\_number "7"; oId "CUFF.58307.1"; tss\_id "TSS41258";  
chr20 Cufflinks exon 31507884 31508021 . + . gene\_id "XLOC\_032716"; transcript\_id "TCONS\_00054643";  
exon\_number "8"; oId "CUFF.58307.1"; tss\_id "TSS41258";  
chr20 Cufflinks exon 31517334 31517426 . + . gene\_id "XLOC\_032716"; transcript\_id "TCONS\_00054643";  
exon\_number "9"; oId "CUFF.58307.1"; tss\_id "TSS41258";  
chr20 Cufflinks exon 31518205 31518422 . + . gene\_id "XLOC\_032716"; transcript\_id "TCONS\_00054643";  
exon\_number "10"; oId "CUFF.58307.1"; tss\_id "TSS41258";  
chr20 Cufflinks exon 31518984 31519142 . + . gene\_id "XLOC\_032716"; transcript\_id "TCONS\_00054643";  
exon\_number "11"; oId "CUFF.58307.1"; tss\_id "TSS41258";  
chr20 Cufflinks exon 31531442 31531610 . + . gene\_id "XLOC\_032716"; transcript\_id "TCONS\_00054643";  
exon\_number "12"; oId "CUFF.58307.1"; tss\_id "TSS41258";  
chr20 Cufflinks exon 31546227 31546356 . + . gene\_id "XLOC\_032716"; transcript\_id "TCONS\_00054643";  
exon\_number "13"; oId "CUFF.58307.1"; tss\_id "TSS41258";  
chr20 Cufflinks exon 31547584 31547855 . + . gene\_id "XLOC\_032716"; transcript\_id "TCONS\_00054643";  
exon\_number "14"; oId "CUFF.58307.1"; tss\_id "TSS41258";  
chr20 Cufflinks exon 31494371 31494435 . + . gene\_id "XLOC\_032716"; transcript\_id "TCONS\_00054644";  
exon\_number "1"; oId "CUFF.58307.3"; tss\_id "TSS41258";  
chr20 Cufflinks exon 31494649 31494800 . + . gene\_id "XLOC\_032716"; transcript\_id "TCONS\_00054644";  
exon\_number "2"; oId "CUFF.58307.3"; tss\_id "TSS41258";  
chr20 Cufflinks exon 31496081 31496218 . + . gene\_id "XLOC\_032716"; transcript\_id "TCONS\_00054644";  
exon\_number "3"; oId "CUFF.58307.3"; tss\_id "TSS41258";  
chr20 Cufflinks exon 31497627 31497737 . + . gene\_id "XLOC\_032716"; transcript\_id "TCONS\_00054644";  
exon\_number "4"; oId "CUFF.58307.3"; tss\_id "TSS41258";  
chr20 Cufflinks exon 31499286 31499513 . + . gene\_id "XLOC\_032716"; transcript\_id "TCONS\_00054644";  
exon\_number "5"; oId "CUFF.58307.3"; tss\_id "TSS41258";  
chr20 Cufflinks exon 31505107 31505311 . + . gene\_id "XLOC\_032716"; transcript\_id "TCONS\_00054644";  
exon\_number "6"; oId "CUFF.58307.3"; tss\_id "TSS41258";  
chr20 Cufflinks exon 31506168 31506380 . + . gene\_id "XLOC\_032716"; transcript\_id "TCONS\_00054644";  
exon\_number "7"; oId "CUFF.58307.3"; tss\_id "TSS41258";  
chr20 Cufflinks exon 31507884 31508021 . + . gene\_id "XLOC\_032716"; transcript\_id "TCONS\_00054644";  
exon\_number "8"; oId "CUFF.58307.3"; tss\_id "TSS41258";  
chr20 Cufflinks exon 31517334 31517426 . + . gene\_id "XLOC\_032716"; transcript\_id "TCONS\_00054644";  
exon\_number "9"; oId "CUFF.58307.3"; tss\_id "TSS41258";

|                                                          |      |          |          |   |   |   |                                                                    |
|----------------------------------------------------------|------|----------|----------|---|---|---|--------------------------------------------------------------------|
| chr20 Cufflinks                                          | exon | 31518205 | 31518422 | . | + | . | gene_id "XLOC_032716"; transcript_id "TCONS_00054644";             |
| exon_number "10"; oId "CUFF.58307.3"; tss_id "TSS41258"; |      |          |          |   |   |   |                                                                    |
| chr20 Cufflinks                                          | exon | 31518984 | 31519142 | . | + | . | gene_id "XLOC_032716"; transcript_id "TCONS_00054644";             |
| exon_number "11"; oId "CUFF.58307.3"; tss_id "TSS41258"; |      |          |          |   |   |   |                                                                    |
| chr20 Cufflinks                                          | exon | 31531442 | 31531610 | . | + | . | gene_id "XLOC_032716"; transcript_id "TCONS_00054644";             |
| exon_number "12"; oId "CUFF.58307.3"; tss_id "TSS41258"; |      |          |          |   |   |   |                                                                    |
| chr20 Cufflinks                                          | exon | 31546227 | 31546407 | . | + | . | gene_id "XLOC_032716"; transcript_id "TCONS_00054644";             |
| exon_number "13"; oId "CUFF.58307.3"; tss_id "TSS41258"; |      |          |          |   |   |   |                                                                    |
| chr20 Cufflinks                                          | exon | 31547584 | 31547788 | . | + | . | gene_id "XLOC_032716"; transcript_id "TCONS_00054644";             |
| exon_number "14"; oId "CUFF.58307.3"; tss_id "TSS41258"; |      |          |          |   |   |   |                                                                    |
| chr20 Cufflinks                                          | exon | 31547869 | 31547967 | . | + | . | gene_id "XLOC_032716"; transcript_id "TCONS_00054644";             |
| exon_number "15"; oId "CUFF.58307.3"; tss_id "TSS41258"; |      |          |          |   |   |   |                                                                    |
| chr20 Cufflinks                                          | exon | 31548942 | 31549819 | . | + | . | gene_id "XLOC_032716"; transcript_id "TCONS_00054644";             |
| exon_number "16"; oId "CUFF.58307.3"; tss_id "TSS41258"; |      |          |          |   |   |   |                                                                    |
| chr20 Cufflinks                                          | exon | 31560744 | 31561099 | . | + | . | gene_id "XLOC_032716"; transcript_id "TCONS_00054644";             |
| exon_number "17"; oId "CUFF.58307.3"; tss_id "TSS41258"; |      |          |          |   |   |   |                                                                    |
| chr20 Cufflinks                                          | exon | 31561859 | 31563423 | . | + | . | gene_id "XLOC_032716"; transcript_id "TCONS_00054644";             |
| exon_number "18"; oId "CUFF.58307.3"; tss_id "TSS41258"; |      |          |          |   |   |   |                                                                    |
| chr20 Cufflinks                                          | exon | 31495941 | 31496219 | . | + | . | gene_id "XLOC_032716"; transcript_id "TCONS_00054645";             |
| exon_number "1"; oId "CUFF.58307.5"; tss_id "TSS41259";  |      |          |          |   |   |   |                                                                    |
| chr20 Cufflinks                                          | exon | 31497628 | 31497737 | . | + | . | gene_id "XLOC_032716"; transcript_id "TCONS_00054645";             |
| exon_number "2"; oId "CUFF.58307.5"; tss_id "TSS41259";  |      |          |          |   |   |   |                                                                    |
| chr20 Cufflinks                                          | exon | 31499286 | 31499513 | . | + | . | gene_id "XLOC_032716"; transcript_id "TCONS_00054645";             |
| exon_number "3"; oId "CUFF.58307.5"; tss_id "TSS41259";  |      |          |          |   |   |   |                                                                    |
| chr20 Cufflinks                                          | exon | 31505107 | 31505311 | . | + | . | gene_id "XLOC_032716"; transcript_id "TCONS_00054645";             |
| exon_number "4"; oId "CUFF.58307.5"; tss_id "TSS41259";  |      |          |          |   |   |   |                                                                    |
| chr20 Cufflinks                                          | exon | 31506168 | 31506380 | . | + | . | gene_id "XLOC_032716"; transcript_id "TCONS_00054645";             |
| exon_number "5"; oId "CUFF.58307.5"; tss_id "TSS41259";  |      |          |          |   |   |   |                                                                    |
| chr20 Cufflinks                                          | exon | 31507884 | 31508021 | . | + | . | gene_id "XLOC_032716"; transcript_id "TCONS_00054645";             |
| exon_number "6"; oId "CUFF.58307.5"; tss_id "TSS41259";  |      |          |          |   |   |   |                                                                    |
| chr20 Cufflinks                                          | exon | 31517334 | 31517425 | . | + | . | gene_id "XLOC_032716"; transcript_id "TCONS_00054645";             |
| exon_number "7"; oId "CUFF.58307.5"; tss_id "TSS41259";  |      |          |          |   |   |   |                                                                    |
| chr20 Cufflinks                                          | exon | 31518204 | 31518422 | . | + | . | gene_id "XLOC_032716"; transcript_id "TCONS_00054645";             |
| exon_number "8"; oId "CUFF.58307.5"; tss_id "TSS41259";  |      |          |          |   |   |   |                                                                    |
| chr20 Cufflinks                                          | exon | 31518984 | 31519142 | . | + | . | gene_id "XLOC_032716"; transcript_id "TCONS_00054645";             |
| exon_number "9"; oId "CUFF.58307.5"; tss_id "TSS41259";  |      |          |          |   |   |   |                                                                    |
| chr20 Cufflinks                                          | exon | 31531442 | 31531610 | . | + | . | gene_id "XLOC_032716"; transcript_id "TCONS_00054645"; exon_number |
| "10"; oId "CUFF.58307.5"; tss_id "TSS41259";             |      |          |          |   |   |   |                                                                    |
| chr20 Cufflinks                                          | exon | 31546227 | 31546360 | . | + | . | gene_id "XLOC_032716"; transcript_id "TCONS_00054645"; exon_number |
| "11"; oId "CUFF.58307.5"; tss_id "TSS41259";             |      |          |          |   |   |   |                                                                    |
| chr20 Cufflinks                                          | exon | 31547572 | 31547788 | . | + | . | gene_id "XLOC_032716"; transcript_id "TCONS_00054645"; exon_number |
| "12"; oId "CUFF.58307.5"; tss_id "TSS41259";             |      |          |          |   |   |   |                                                                    |
| chr20 Cufflinks                                          | exon | 31547869 | 31547967 | . | + | . | gene_id "XLOC_032716"; transcript_id "TCONS_00054645"; exon_number |

|                                              |   |   |   |                                                                    |  |
|----------------------------------------------|---|---|---|--------------------------------------------------------------------|--|
| "13"; oId "CUFF.58307.5"; tss_id "TSS41259"; |   |   |   |                                                                    |  |
| chr20 Cufflinks exon31548942 31549466        | . | + | . | gene_id "XLOC_032716"; transcript_id "TCONS_00054645"; exon_number |  |
| "14"; oId "CUFF.58307.5"; tss_id "TSS41259"; |   |   |   |                                                                    |  |
| chr20 Cufflinks exon31504889 31505311        | . | + | . | gene_id "XLOC_032716"; transcript_id "TCONS_00054646"; exon_number |  |
| "1"; oId "CUFF.58307.6"; tss_id "TSS41260";  |   |   |   |                                                                    |  |
| chr20 Cufflinks exon31506168 31506380        | . | + | . | gene_id "XLOC_032716"; transcript_id "TCONS_00054646"; exon_number |  |
| "2"; oId "CUFF.58307.6"; tss_id "TSS41260";  |   |   |   |                                                                    |  |
| chr20 Cufflinks exon31507884 31508021        | . | + | . | gene_id "XLOC_032716"; transcript_id "TCONS_00054646"; exon_number |  |
| "3"; oId "CUFF.58307.6"; tss_id "TSS41260";  |   |   |   |                                                                    |  |
| chr20 Cufflinks exon31517334 31517426        | . | + | . | gene_id "XLOC_032716"; transcript_id "TCONS_00054646"; exon_number |  |
| "4"; oId "CUFF.58307.6"; tss_id "TSS41260";  |   |   |   |                                                                    |  |
| chr20 Cufflinks exon31518205 31518422        | . | + | . | gene_id "XLOC_032716"; transcript_id "TCONS_00054646"; exon_number |  |
| "5"; oId "CUFF.58307.6"; tss_id "TSS41260";  |   |   |   |                                                                    |  |
| chr20 Cufflinks exon31518984 31519142        | . | + | . | gene_id "XLOC_032716"; transcript_id "TCONS_00054646"; exon_number |  |
| "6"; oId "CUFF.58307.6"; tss_id "TSS41260";  |   |   |   |                                                                    |  |
| chr20 Cufflinks exon31531442 31531610        | . | + | . | gene_id "XLOC_032716"; transcript_id "TCONS_00054646"; exon_number |  |
| "7"; oId "CUFF.58307.6"; tss_id "TSS41260";  |   |   |   |                                                                    |  |
| chr20 Cufflinks exon31534094 31534296        | . | + | . | gene_id "XLOC_032716"; transcript_id "TCONS_00054646"; exon_number |  |
| "8"; oId "CUFF.58307.6"; tss_id "TSS41260";  |   |   |   |                                                                    |  |
| chr20 Cufflinks exon31560322 31561103        | . | + | . | gene_id "XLOC_032716"; transcript_id "TCONS_00054648"; exon_number |  |
| "1"; oId "CUFF.58307.13"; tss_id "TSS41261"; |   |   |   |                                                                    |  |
| chr20 Cufflinks exon31561933 31563423        | . | + | . | gene_id "XLOC_032716"; transcript_id "TCONS_00054648"; exon_number |  |
| "2"; oId "CUFF.58307.13"; tss_id "TSS41261"; |   |   |   |                                                                    |  |
| chr20 Cufflinks exon31560322 31561099        | . | + | . | gene_id "XLOC_032716"; transcript_id "TCONS_00054647"; exon_number |  |
| "1"; oId "CUFF.58307.12"; tss_id "TSS41261"; |   |   |   |                                                                    |  |
| chr20 Cufflinks exon31561859 31563423        | . | + | . | gene_id "XLOC_032716"; transcript_id "TCONS_00054647"; exon_number |  |
| "2"; oId "CUFF.58307.12"; tss_id "TSS41261"; |   |   |   |                                                                    |  |
| chr20 Cufflinks exon31560397 31561103        | . | + | . | gene_id "XLOC_032716"; transcript_id "TCONS_00054649"; exon_number |  |
| "1"; oId "CUFF.58307.14"; tss_id "TSS41261"; |   |   |   |                                                                    |  |
| chr20 Cufflinks exon31561859 31563423        | . | + | . | gene_id "XLOC_032716"; transcript_id "TCONS_00054649"; exon_number |  |
| "2"; oId "CUFF.58307.14"; tss_id "TSS41261"; |   |   |   |                                                                    |  |
| chr20 Cufflinks exon46988654 46988893        | . | + | . | gene_id "XLOC_032879"; transcript_id "TCONS_00054935"; exon_number |  |
| "1"; oId "CUFF.59011.3"; tss_id "TSS41465";  |   |   |   |                                                                    |  |
| chr20 Cufflinks exon46995217 46995376        | . | + | . | gene_id "XLOC_032879"; transcript_id "TCONS_00054935"; exon_number |  |
| "2"; oId "CUFF.59011.3"; tss_id "TSS41465";  |   |   |   |                                                                    |  |
| chr20 Cufflinks exon46995479 46995802        | . | + | . | gene_id "XLOC_032879"; transcript_id "TCONS_00054935"; exon_number |  |
| "3"; oId "CUFF.59011.3"; tss_id "TSS41465";  |   |   |   |                                                                    |  |
| chr20 Cufflinks exon46996823 47000780        | . | + | . | gene_id "XLOC_032879"; transcript_id "TCONS_00054935"; exon_number |  |
| "4"; oId "CUFF.59011.3"; tss_id "TSS41465";  |   |   |   |                                                                    |  |
| chr20 Cufflinks exon46988654 46988893        | . | + | . | gene_id "XLOC_032879"; transcript_id "TCONS_00054937"; exon_number |  |
| "1"; oId "CUFF.59011.5"; tss_id "TSS41465";  |   |   |   |                                                                    |  |
| chr20 Cufflinks exon46995217 47000780        | . | + | . | gene_id "XLOC_032879"; transcript_id "TCONS_00054937"; exon_number |  |
| "2"; oId "CUFF.59011.5"; tss_id "TSS41465";  |   |   |   |                                                                    |  |

|       |                        |          |   |   |   |                                                                                                                 |
|-------|------------------------|----------|---|---|---|-----------------------------------------------------------------------------------------------------------------|
| chr20 | Cufflinks exon46988654 | 46988893 | . | + | . | gene_id "XLOC_032879"; transcript_id "TCONS_00054936"; exon_number "1"; oId "CUFF.59011.4"; tss_id "TSS41465";  |
| chr20 | Cufflinks exon46996823 | 47000780 | . | + | . | gene_id "XLOC_032879"; transcript_id "TCONS_00054936"; exon_number "2"; oId "CUFF.59011.4"; tss_id "TSS41465";  |
| chr20 | Cufflinks exon46988654 | 46988893 | . | + | . | gene_id "XLOC_032879"; transcript_id "TCONS_00054934"; exon_number "1"; oId "CUFF.59011.2"; tss_id "TSS41465";  |
| chr20 | Cufflinks exon46993632 | 46993940 | . | + | . | gene_id "XLOC_032879"; transcript_id "TCONS_00054934"; exon_number "2"; oId "CUFF.59011.2"; tss_id "TSS41465";  |
| chr20 | Cufflinks exon46995217 | 46995376 | . | + | . | gene_id "XLOC_032879"; transcript_id "TCONS_00054934"; exon_number "3"; oId "CUFF.59011.2"; tss_id "TSS41465";  |
| chr20 | Cufflinks exon46996823 | 47000780 | . | + | . | gene_id "XLOC_032879"; transcript_id "TCONS_00054934"; exon_number "4"; oId "CUFF.59011.2"; tss_id "TSS41465";  |
| chr20 | Cufflinks exon46988654 | 46988893 | . | + | . | gene_id "XLOC_032879"; transcript_id "TCONS_00054933"; exon_number "1"; oId "CUFF.59011.1"; tss_id "TSS41465";  |
| chr20 | Cufflinks exon46993632 | 46993940 | . | + | . | gene_id "XLOC_032879"; transcript_id "TCONS_00054933"; exon_number "2"; oId "CUFF.59011.1"; tss_id "TSS41465";  |
| chr20 | Cufflinks exon46995217 | 46995376 | . | + | . | gene_id "XLOC_032879"; transcript_id "TCONS_00054933"; exon_number "3"; oId "CUFF.59011.1"; tss_id "TSS41465";  |
| chr20 | Cufflinks exon46995479 | 46995802 | . | + | . | gene_id "XLOC_032879"; transcript_id "TCONS_00054933"; exon_number "4"; oId "CUFF.59011.1"; tss_id "TSS41465";  |
| chr20 | Cufflinks exon46996823 | 47000780 | . | + | . | gene_id "XLOC_032879"; transcript_id "TCONS_00054933"; exon_number "5"; oId "CUFF.59011.1"; tss_id "TSS41465";  |
| chr20 | Cufflinks exon46991291 | 46995376 | . | + | . | gene_id "XLOC_032879"; transcript_id "TCONS_00054939"; exon_number "1"; oId "CUFF.59011.7"; tss_id "TSS41466";  |
| chr20 | Cufflinks exon46996823 | 47000780 | . | + | . | gene_id "XLOC_032879"; transcript_id "TCONS_00054939"; exon_number "2"; oId "CUFF.59011.7"; tss_id "TSS41466";  |
| chr20 | Cufflinks exon46991405 | 46993940 | . | + | . | gene_id "XLOC_032879"; transcript_id "TCONS_00054940"; exon_number "1"; oId "CUFF.59011.8"; tss_id "TSS41467";  |
| chr20 | Cufflinks exon46995217 | 46995376 | . | + | . | gene_id "XLOC_032879"; transcript_id "TCONS_00054940"; exon_number "2"; oId "CUFF.59011.8"; tss_id "TSS41467";  |
| chr20 | Cufflinks exon46995479 | 46995802 | . | + | . | gene_id "XLOC_032879"; transcript_id "TCONS_00054940"; exon_number "3"; oId "CUFF.59011.8"; tss_id "TSS41467";  |
| chr20 | Cufflinks exon46996823 | 47000780 | . | + | . | gene_id "XLOC_032879"; transcript_id "TCONS_00054940"; exon_number "4"; oId "CUFF.59011.8"; tss_id "TSS41467";  |
| chr20 | Cufflinks exon46994953 | 46995376 | . | + | . | gene_id "XLOC_032879"; transcript_id "TCONS_00054942"; exon_number "1"; oId "CUFF.59011.10"; tss_id "TSS41469"; |
| chr20 | Cufflinks exon46995479 | 46995802 | . | + | . | gene_id "XLOC_032879"; transcript_id "TCONS_00054942"; exon_number "2"; oId "CUFF.59011.10"; tss_id "TSS41469"; |
| chr20 | Cufflinks exon46996823 | 47000780 | . | + | . | gene_id "XLOC_032879"; transcript_id "TCONS_00054942"; exon_number "3"; oId "CUFF.59011.10"; tss_id "TSS41469"; |
| chr20 | Cufflinks exon53691104 | 53691229 | . | + | . | gene_id "XLOC_032930"; transcript_id "TCONS_00055007"; exon_number "1"; oId "CUFF.59187.1"; tss_id "TSS41526";  |
| chr20 | Cufflinks exon53691352 | 53691724 | . | + | . | gene_id "XLOC_032930"; transcript_id "TCONS_00055007"; exon_number                                              |

|                                             |   |   |   |                                                                    |  |
|---------------------------------------------|---|---|---|--------------------------------------------------------------------|--|
| "2"; oId "CUFF.59187.1"; tss_id "TSS41526"; |   |   |   |                                                                    |  |
| chr20 Cufflinks exon55577187 55577371       | . | + | . | gene_id "XLOC_032949"; transcript_id "TCONS_00055037"; exon_number |  |
| "1"; oId "CUFF.59218.1"; tss_id "TSS41552"; |   |   |   |                                                                    |  |
| chr20 Cufflinks exon55577504 55583819       | . | + | . | gene_id "XLOC_032949"; transcript_id "TCONS_00055037"; exon_number |  |
| "2"; oId "CUFF.59218.1"; tss_id "TSS41552"; |   |   |   |                                                                    |  |
| chr20 Cufflinks exon55577319 55577371       | . | + | . | gene_id "XLOC_032949"; transcript_id "TCONS_00055038"; exon_number |  |
| "1"; oId "CUFF.59218.2"; tss_id "TSS41553"; |   |   |   |                                                                    |  |
| chr20 Cufflinks exon55577504 55577823       | . | + | . | gene_id "XLOC_032949"; transcript_id "TCONS_00055038"; exon_number |  |
| "2"; oId "CUFF.59218.2"; tss_id "TSS41553"; |   |   |   |                                                                    |  |
| chr20 Cufflinks exon55578270 55583819       | . | + | . | gene_id "XLOC_032949"; transcript_id "TCONS_00055038"; exon_number |  |
| "3"; oId "CUFF.59218.2"; tss_id "TSS41553"; |   |   |   |                                                                    |  |
| chr20 Cufflinks exon56295598 56295713       | . | + | . | gene_id "XLOC_032966"; transcript_id "TCONS_00055056"; exon_number |  |
| "1"; oId "CUFF.59279.4"; tss_id "TSS41570"; |   |   |   |                                                                    |  |
| chr20 Cufflinks exon56296391 56296514       | . | + | . | gene_id "XLOC_032966"; transcript_id "TCONS_00055056"; exon_number |  |
| "2"; oId "CUFF.59279.4"; tss_id "TSS41570"; |   |   |   |                                                                    |  |
| chr20 Cufflinks exon56297668 56297758       | . | + | . | gene_id "XLOC_032966"; transcript_id "TCONS_00055056"; exon_number |  |
| "3"; oId "CUFF.59279.4"; tss_id "TSS41570"; |   |   |   |                                                                    |  |
| chr20 Cufflinks exon56298702 56298897       | . | + | . | gene_id "XLOC_032966"; transcript_id "TCONS_00055056"; exon_number |  |
| "4"; oId "CUFF.59279.4"; tss_id "TSS41570"; |   |   |   |                                                                    |  |
| chr20 Cufflinks exon56300120 56304531       | . | + | . | gene_id "XLOC_032966"; transcript_id "TCONS_00055056"; exon_number |  |
| "5"; oId "CUFF.59279.4"; tss_id "TSS41570"; |   |   |   |                                                                    |  |
| chr20 Cufflinks exon56343813 56343988       | . | + | . | gene_id "XLOC_032967"; transcript_id "TCONS_00055057"; exon_number |  |
| "1"; oId "CUFF.59280.3"; tss_id "TSS41571"; |   |   |   |                                                                    |  |
| chr20 Cufflinks exon56400889 56402725       | . | + | . | gene_id "XLOC_032967"; transcript_id "TCONS_00055057"; exon_number |  |
| "2"; oId "CUFF.59280.3"; tss_id "TSS41571"; |   |   |   |                                                                    |  |
| chr20 Cufflinks exon56400465 56400534       | . | + | . | gene_id "XLOC_032967"; transcript_id "TCONS_00055059"; exon_number |  |
| "1"; oId "CUFF.59280.8"; tss_id "TSS41572"; |   |   |   |                                                                    |  |
| chr20 Cufflinks exon56400889 56402725       | . | + | . | gene_id "XLOC_032967"; transcript_id "TCONS_00055059"; exon_number |  |
| "2"; oId "CUFF.59280.8"; tss_id "TSS41572"; |   |   |   |                                                                    |  |
| chr20 Cufflinks exon56410958 56414938       | . | + | . | gene_id "XLOC_032971"; transcript_id "TCONS_00055062"; exon_number |  |
| "1"; oId "CUFF.59287.1"; tss_id "TSS41576"; |   |   |   |                                                                    |  |
| chr20 Cufflinks exon56415209 56417023       | . | + | . | gene_id "XLOC_032971"; transcript_id "TCONS_00055062"; exon_number |  |
| "2"; oId "CUFF.59287.1"; tss_id "TSS41576"; |   |   |   |                                                                    |  |
| chr20 Cufflinks exon56410958 56411378       | . | + | . | gene_id "XLOC_032971"; transcript_id "TCONS_00055063"; exon_number |  |
| "1"; oId "CUFF.59287.2"; tss_id "TSS41576"; |   |   |   |                                                                    |  |
| chr20 Cufflinks exon56412163 56415402       | . | + | . | gene_id "XLOC_032971"; transcript_id "TCONS_00055063"; exon_number |  |
| "2"; oId "CUFF.59287.2"; tss_id "TSS41576"; |   |   |   |                                                                    |  |
| chr20 Cufflinks exon56417040 56417208       | . | + | . | gene_id "XLOC_032971"; transcript_id "TCONS_00055063"; exon_number |  |
| "3"; oId "CUFF.59287.2"; tss_id "TSS41576"; |   |   |   |                                                                    |  |
| chr20 Cufflinks exon58662741 58663055       | . | + | . | gene_id "XLOC_033046"; transcript_id "TCONS_00055171"; exon_number |  |
| "1"; oId "CUFF.59438.9"; tss_id "TSS41667"; |   |   |   |                                                                    |  |
| chr20 Cufflinks exon58663652 58663776       | . | + | . | gene_id "XLOC_033046"; transcript_id "TCONS_00055171"; exon_number |  |
| "2"; oId "CUFF.59438.9"; tss_id "TSS41667"; |   |   |   |                                                                    |  |

|       |                        |          |   |   |   |                                                                                                                 |
|-------|------------------------|----------|---|---|---|-----------------------------------------------------------------------------------------------------------------|
| chr20 | Cufflinks exon58673984 | 58674018 | . | + | . | gene_id "XLOC_033046"; transcript_id "TCONS_00055171"; exon_number "3"; oId "CUFF.59438.9"; tss_id "TSS41667";  |
| chr20 | Cufflinks exon58675226 | 58675274 | . | + | . | gene_id "XLOC_033046"; transcript_id "TCONS_00055171"; exon_number "4"; oId "CUFF.59438.9"; tss_id "TSS41667";  |
| chr20 | Cufflinks exon58676147 | 58676442 | . | + | . | gene_id "XLOC_033046"; transcript_id "TCONS_00055171"; exon_number "5"; oId "CUFF.59438.9"; tss_id "TSS41667";  |
| chr20 | Cufflinks exon58662741 | 58663055 | . | + | . | gene_id "XLOC_033046"; transcript_id "TCONS_00055170"; exon_number "1"; oId "CUFF.59438.11"; tss_id "TSS41667"; |
| chr20 | Cufflinks exon58663652 | 58663776 | . | + | . | gene_id "XLOC_033046"; transcript_id "TCONS_00055170"; exon_number "2"; oId "CUFF.59438.11"; tss_id "TSS41667"; |
| chr20 | Cufflinks exon58673984 | 58674124 | . | + | . | gene_id "XLOC_033046"; transcript_id "TCONS_00055170"; exon_number "3"; oId "CUFF.59438.11"; tss_id "TSS41667"; |
| chr20 | Cufflinks exon58675226 | 58675274 | . | + | . | gene_id "XLOC_033046"; transcript_id "TCONS_00055170"; exon_number "4"; oId "CUFF.59438.11"; tss_id "TSS41667"; |
| chr20 | Cufflinks exon58676150 | 58676442 | . | + | . | gene_id "XLOC_033046"; transcript_id "TCONS_00055170"; exon_number "5"; oId "CUFF.59438.11"; tss_id "TSS41667"; |
| chr20 | Cufflinks exon58662741 | 58663055 | . | + | . | gene_id "XLOC_033046"; transcript_id "TCONS_00055169"; exon_number "1"; oId "CUFF.59438.10"; tss_id "TSS41667"; |
| chr20 | Cufflinks exon58663652 | 58663776 | . | + | . | gene_id "XLOC_033046"; transcript_id "TCONS_00055169"; exon_number "2"; oId "CUFF.59438.10"; tss_id "TSS41667"; |
| chr20 | Cufflinks exon58673984 | 58674018 | . | + | . | gene_id "XLOC_033046"; transcript_id "TCONS_00055169"; exon_number "3"; oId "CUFF.59438.10"; tss_id "TSS41667"; |
| chr20 | Cufflinks exon58675226 | 58675274 | . | + | . | gene_id "XLOC_033046"; transcript_id "TCONS_00055169"; exon_number "4"; oId "CUFF.59438.10"; tss_id "TSS41667"; |
| chr20 | Cufflinks exon58675814 | 58676442 | . | + | . | gene_id "XLOC_033046"; transcript_id "TCONS_00055169"; exon_number "5"; oId "CUFF.59438.10"; tss_id "TSS41667"; |
| chr20 | Cufflinks exon58712998 | 58713700 | . | + | . | gene_id "XLOC_033046"; transcript_id "TCONS_00055185"; exon_number "1"; oId "CUFF.59438.12"; tss_id "TSS41668"; |
| chr20 | Cufflinks exon58729463 | 58729557 | . | + | . | gene_id "XLOC_033046"; transcript_id "TCONS_00055185"; exon_number "2"; oId "CUFF.59438.12"; tss_id "TSS41668"; |
| chr20 | Cufflinks exon58755893 | 58755971 | . | + | . | gene_id "XLOC_033046"; transcript_id "TCONS_00055185"; exon_number "3"; oId "CUFF.59438.12"; tss_id "TSS41668"; |
| chr20 | Cufflinks exon58893979 | 58894065 | . | + | . | gene_id "XLOC_033046"; transcript_id "TCONS_00055185"; exon_number "4"; oId "CUFF.59438.12"; tss_id "TSS41668"; |
| chr20 | Cufflinks exon58895691 | 58901359 | . | + | . | gene_id "XLOC_033046"; transcript_id "TCONS_00055185"; exon_number "5"; oId "CUFF.59438.12"; tss_id "TSS41668"; |
| chr20 | Cufflinks exon58713548 | 58713700 | . | + | . | gene_id "XLOC_033046"; transcript_id "TCONS_00055186"; exon_number "1"; oId "CUFF.59438.13"; tss_id "TSS41669"; |
| chr20 | Cufflinks exon58729463 | 58729562 | . | + | . | gene_id "XLOC_033046"; transcript_id "TCONS_00055186"; exon_number "2"; oId "CUFF.59438.13"; tss_id "TSS41669"; |
| chr20 | Cufflinks exon58755893 | 58755971 | . | + | . | gene_id "XLOC_033046"; transcript_id "TCONS_00055186"; exon_number "3"; oId "CUFF.59438.13"; tss_id "TSS41669"; |
| chr20 | Cufflinks exon58893979 | 58894065 | . | + | . | gene_id "XLOC_033046"; transcript_id "TCONS_00055186"; exon_number "4"; oId "CUFF.59438.13"; tss_id "TSS41669"; |

|                                              |   |   |   |                                                                    |  |
|----------------------------------------------|---|---|---|--------------------------------------------------------------------|--|
| "4"; oId "CUFF.59438.13"; tss_id "TSS41669"; |   |   |   |                                                                    |  |
| chr20 Cufflinks exon58895691 58901359        | . | + | . | gene_id "XLOC_033046"; transcript_id "TCONS_00055186"; exon_number |  |
| "5"; oId "CUFF.59438.13"; tss_id "TSS41669"; |   |   |   |                                                                    |  |
| chr20 Cufflinks exon58821904 58821985        | . | + | . | gene_id "XLOC_033046"; transcript_id "TCONS_00055191"; exon_number |  |
| "1"; oId "CUFF.59438.14"; tss_id "TSS41670"; |   |   |   |                                                                    |  |
| chr20 Cufflinks exon58893979 58894065        | . | + | . | gene_id "XLOC_033046"; transcript_id "TCONS_00055191"; exon_number |  |
| "2"; oId "CUFF.59438.14"; tss_id "TSS41670"; |   |   |   |                                                                    |  |
| chr20 Cufflinks exon58895691 58901359        | . | + | . | gene_id "XLOC_033046"; transcript_id "TCONS_00055191"; exon_number |  |
| "3"; oId "CUFF.59438.14"; tss_id "TSS41670"; |   |   |   |                                                                    |  |
| chr20 Cufflinks exon58830690 58830911        | . | + | . | gene_id "XLOC_033046"; transcript_id "TCONS_00055194"; exon_number |  |
| "1"; oId "CUFF.59438.18"; tss_id "TSS41671"; |   |   |   |                                                                    |  |
| chr20 Cufflinks exon58895691 58901359        | . | + | . | gene_id "XLOC_033046"; transcript_id "TCONS_00055194"; exon_number |  |
| "2"; oId "CUFF.59438.18"; tss_id "TSS41671"; |   |   |   |                                                                    |  |
| chr20 Cufflinks exon58830690 58830881        | . | + | . | gene_id "XLOC_033046"; transcript_id "TCONS_00055193"; exon_number |  |
| "1"; oId "CUFF.59438.17"; tss_id "TSS41671"; |   |   |   |                                                                    |  |
| chr20 Cufflinks exon58859535 58859651        | . | + | . | gene_id "XLOC_033046"; transcript_id "TCONS_00055193"; exon_number |  |
| "2"; oId "CUFF.59438.17"; tss_id "TSS41671"; |   |   |   |                                                                    |  |
| chr20 Cufflinks exon58893979 58894065        | . | + | . | gene_id "XLOC_033046"; transcript_id "TCONS_00055193"; exon_number |  |
| "3"; oId "CUFF.59438.17"; tss_id "TSS41671"; |   |   |   |                                                                    |  |
| chr20 Cufflinks exon58895691 58901359        | . | + | . | gene_id "XLOC_033046"; transcript_id "TCONS_00055193"; exon_number |  |
| "4"; oId "CUFF.59438.17"; tss_id "TSS41671"; |   |   |   |                                                                    |  |
| chr20 Cufflinks exon58830690 58830881        | . | + | . | gene_id "XLOC_033046"; transcript_id "TCONS_00055192"; exon_number |  |
| "1"; oId "CUFF.59438.16"; tss_id "TSS41671"; |   |   |   |                                                                    |  |
| chr20 Cufflinks exon58832162 58833175        | . | + | . | gene_id "XLOC_033046"; transcript_id "TCONS_00055192"; exon_number |  |
| "2"; oId "CUFF.59438.16"; tss_id "TSS41671"; |   |   |   |                                                                    |  |
| chr20 Cufflinks exon58833271 58833342        | . | + | . | gene_id "XLOC_033046"; transcript_id "TCONS_00055192"; exon_number |  |
| "3"; oId "CUFF.59438.16"; tss_id "TSS41671"; |   |   |   |                                                                    |  |
| chr20 Cufflinks exon58899470 58901359        | . | + | . | gene_id "XLOC_033046"; transcript_id "TCONS_00055192"; exon_number |  |
| "4"; oId "CUFF.59438.16"; tss_id "TSS41671"; |   |   |   |                                                                    |  |
| chr20 Cufflinks exon58863384 58863420        | . | + | . | gene_id "XLOC_033046"; transcript_id "TCONS_00055207"; exon_number |  |
| "1"; oId "CUFF.59438.19"; tss_id "TSS41672"; |   |   |   |                                                                    |  |
| chr20 Cufflinks exon58888368 58888445        | . | + | . | gene_id "XLOC_033046"; transcript_id "TCONS_00055207"; exon_number |  |
| "2"; oId "CUFF.59438.19"; tss_id "TSS41672"; |   |   |   |                                                                    |  |
| chr20 Cufflinks exon58893979 58894065        | . | + | . | gene_id "XLOC_033046"; transcript_id "TCONS_00055207"; exon_number |  |
| "3"; oId "CUFF.59438.19"; tss_id "TSS41672"; |   |   |   |                                                                    |  |
| chr20 Cufflinks exon58895691 58901359        | . | + | . | gene_id "XLOC_033046"; transcript_id "TCONS_00055207"; exon_number |  |
| "4"; oId "CUFF.59438.19"; tss_id "TSS41672"; |   |   |   |                                                                    |  |
| chr20 Cufflinks exon58884677 58894065        | . | + | . | gene_id "XLOC_033046"; transcript_id "TCONS_00055214"; exon_number |  |
| "1"; oId "CUFF.59438.20"; tss_id "TSS41673"; |   |   |   |                                                                    |  |
| chr20 Cufflinks exon58895691 58901359        | . | + | . | gene_id "XLOC_033046"; transcript_id "TCONS_00055214"; exon_number |  |
| "2"; oId "CUFF.59438.20"; tss_id "TSS41673"; |   |   |   |                                                                    |  |
| chr20 Cufflinks exon58995328 58997717        | . | + | . | gene_id "XLOC_033096"; transcript_id "TCONS_00055228"; exon_number |  |
| "1"; oId "CUFF.59530.1"; tss_id "TSS41723";  |   |   |   |                                                                    |  |



|       |                        |          |   |   |   |                                                                                                                |
|-------|------------------------|----------|---|---|---|----------------------------------------------------------------------------------------------------------------|
| chr20 | Cufflinks exon58998524 | 58998773 | . | + | . | gene_id "XLOC_033096"; transcript_id "TCONS_00055228"; exon_number "2"; oId "CUFF.59530.1"; tss_id "TSS41723"; |
| chr20 | Cufflinks exon59000757 | 59002118 | . | + | . | gene_id "XLOC_033096"; transcript_id "TCONS_00055228"; exon_number "3"; oId "CUFF.59530.1"; tss_id "TSS41723"; |
| chr20 | Cufflinks exon59102696 | 59106971 | . | + | . | gene_id "XLOC_033115"; transcript_id "TCONS_00055251"; exon_number "1"; oId "CUFF.59562.2"; tss_id "TSS41745"; |
| chr20 | Cufflinks exon59114972 | 59116903 | . | + | . | gene_id "XLOC_033115"; transcript_id "TCONS_00055251"; exon_number "2"; oId "CUFF.59562.2"; tss_id "TSS41745"; |
| chr20 | Cufflinks exon59106817 | 59106971 | . | + | . | gene_id "XLOC_033115"; transcript_id "TCONS_00055252"; exon_number "1"; oId "CUFF.59562.3"; tss_id "TSS41746"; |
| chr20 | Cufflinks exon59108219 | 59108975 | . | + | . | gene_id "XLOC_033115"; transcript_id "TCONS_00055252"; exon_number "2"; oId "CUFF.59562.3"; tss_id "TSS41746"; |
| chr20 | Cufflinks exon60638434 | 60639105 | . | + | . | gene_id "XLOC_033155"; transcript_id "TCONS_00055299"; exon_number "1"; oId "CUFF.59639.1"; tss_id "TSS41790"; |
| chr20 | Cufflinks exon60641998 | 60647429 | . | + | . | gene_id "XLOC_033155"; transcript_id "TCONS_00055299"; exon_number "2"; oId "CUFF.59639.1"; tss_id "TSS41790"; |
| chr20 | Cufflinks exon60641240 | 60641747 | . | + | . | gene_id "XLOC_033155"; transcript_id "TCONS_00055301"; exon_number "1"; oId "CUFF.59639.3"; tss_id "TSS41792"; |
| chr20 | Cufflinks exon60641998 | 60647429 | . | + | . | gene_id "XLOC_033155"; transcript_id "TCONS_00055301"; exon_number "2"; oId "CUFF.59639.3"; tss_id "TSS41792"; |
| chr20 | Cufflinks exon61317598 | 61318212 | . | + | . | gene_id "XLOC_033173"; transcript_id "TCONS_00055334"; exon_number "1"; oId "CUFF.59685.1"; tss_id "TSS41812"; |
| chr20 | Cufflinks exon61318269 | 61318367 | . | + | . | gene_id "XLOC_033173"; transcript_id "TCONS_00055334"; exon_number "2"; oId "CUFF.59685.1"; tss_id "TSS41812"; |
| chr20 | Cufflinks exon61318396 | 61318628 | . | + | . | gene_id "XLOC_033173"; transcript_id "TCONS_00055334"; exon_number "3"; oId "CUFF.59685.1"; tss_id "TSS41812"; |
| chr20 | Cufflinks exon61638207 | 61640825 | . | + | . | gene_id "XLOC_033194"; transcript_id "TCONS_00055364"; exon_number "1"; oId "CUFF.59737.3"; tss_id "TSS41840"; |
| chr20 | Cufflinks exon61641658 | 61646647 | . | + | . | gene_id "XLOC_033194"; transcript_id "TCONS_00055364"; exon_number "2"; oId "CUFF.59737.3"; tss_id "TSS41840"; |
| chr20 | Cufflinks exon61647575 | 61659382 | . | + | . | gene_id "XLOC_033194"; transcript_id "TCONS_00055364"; exon_number "3"; oId "CUFF.59737.3"; tss_id "TSS41840"; |
| chr20 | Cufflinks exon61638207 | 61646647 | . | + | . | gene_id "XLOC_033194"; transcript_id "TCONS_00055365"; exon_number "1"; oId "CUFF.59737.2"; tss_id "TSS41840"; |
| chr20 | Cufflinks exon61663168 | 61669524 | . | + | . | gene_id "XLOC_033194"; transcript_id "TCONS_00055365"; exon_number "2"; oId "CUFF.59737.2"; tss_id "TSS41840"; |
| chr20 | Cufflinks exon61674129 | 61676543 | . | + | . | gene_id "XLOC_033194"; transcript_id "TCONS_00055365"; exon_number "3"; oId "CUFF.59737.2"; tss_id "TSS41840"; |
| chr20 | Cufflinks exon61676623 | 61679916 | . | + | . | gene_id "XLOC_033194"; transcript_id "TCONS_00055365"; exon_number "4"; oId "CUFF.59737.2"; tss_id "TSS41840"; |
| chr20 | Cufflinks exon61638207 | 61639799 | . | + | . | gene_id "XLOC_033194"; transcript_id "TCONS_00055366"; exon_number "1"; oId "CUFF.59737.1"; tss_id "TSS41840"; |
| chr20 | Cufflinks exon61640704 | 61646647 | . | + | . | gene_id "XLOC_033194"; transcript_id "TCONS_00055366"; exon_number "2"; oId "CUFF.59737.1"; tss_id "TSS41840"; |

|                                             |   |   |   |                                                                    |  |
|---------------------------------------------|---|---|---|--------------------------------------------------------------------|--|
| "2"; oId "CUFF.59737.1"; tss_id "TSS41840"; |   |   |   |                                                                    |  |
| chr20 Cufflinks exon61663168 61669537       | . | + | . | gene_id "XLOC_033194"; transcript_id "TCONS_00055366"; exon_number |  |
| "3"; oId "CUFF.59737.1"; tss_id "TSS41840"; |   |   |   |                                                                    |  |
| chr20 Cufflinks exon61680208 61680277       | . | + | . | gene_id "XLOC_033194"; transcript_id "TCONS_00055366"; exon_number |  |
| "4"; oId "CUFF.59737.1"; tss_id "TSS41840"; |   |   |   |                                                                    |  |
| chr20 Cufflinks exon61680864 61681008       | . | + | . | gene_id "XLOC_033194"; transcript_id "TCONS_00055366"; exon_number |  |
| "5"; oId "CUFF.59737.1"; tss_id "TSS41840"; |   |   |   |                                                                    |  |
| chr20 Cufflinks exon61682974 61683103       | . | + | . | gene_id "XLOC_033194"; transcript_id "TCONS_00055366"; exon_number |  |
| "6"; oId "CUFF.59737.1"; tss_id "TSS41840"; |   |   |   |                                                                    |  |
| chr20 Cufflinks exon61684257 61684618       | . | + | . | gene_id "XLOC_033194"; transcript_id "TCONS_00055366"; exon_number |  |
| "7"; oId "CUFF.59737.1"; tss_id "TSS41840"; |   |   |   |                                                                    |  |
| chr20 Cufflinks exon61684864 61686772       | . | + | . | gene_id "XLOC_033194"; transcript_id "TCONS_00055366"; exon_number |  |
| "8"; oId "CUFF.59737.1"; tss_id "TSS41840"; |   |   |   |                                                                    |  |
| chr20 Cufflinks exon61638420 61638597       | . | + | . | gene_id "XLOC_033194"; transcript_id "TCONS_00055367"; exon_number |  |
| "1"; oId "CUFF.59737.4"; tss_id "TSS41841"; |   |   |   |                                                                    |  |
| chr20 Cufflinks exon61663168 61665723       | . | + | . | gene_id "XLOC_033194"; transcript_id "TCONS_00055367"; exon_number |  |
| "2"; oId "CUFF.59737.4"; tss_id "TSS41841"; |   |   |   |                                                                    |  |
| chr20 Cufflinks exon61639913 61640825       | . | + | . | gene_id "XLOC_033194"; transcript_id "TCONS_00055368"; exon_number |  |
| "1"; oId "CUFF.59737.6"; tss_id "TSS41842"; |   |   |   |                                                                    |  |
| chr20 Cufflinks exon61711344 61711455       | . | + | . | gene_id "XLOC_033194"; transcript_id "TCONS_00055368"; exon_number |  |
| "2"; oId "CUFF.59737.6"; tss_id "TSS41842"; |   |   |   |                                                                    |  |
| chr20 Cufflinks exon61711662 61712298       | . | + | . | gene_id "XLOC_033194"; transcript_id "TCONS_00055368"; exon_number |  |
| "3"; oId "CUFF.59737.6"; tss_id "TSS41842"; |   |   |   |                                                                    |  |
| chr20 Cufflinks exon61713534 61716243       | . | + | . | gene_id "XLOC_033194"; transcript_id "TCONS_00055368"; exon_number |  |
| "4"; oId "CUFF.59737.6"; tss_id "TSS41842"; |   |   |   |                                                                    |  |
| chr20 Cufflinks exon61716286 61717298       | . | + | . | gene_id "XLOC_033194"; transcript_id "TCONS_00055368"; exon_number |  |
| "5"; oId "CUFF.59737.6"; tss_id "TSS41842"; |   |   |   |                                                                    |  |
| chr20 Cufflinks exon61640655 61640825       | . | + | . | gene_id "XLOC_033194"; transcript_id "TCONS_00055369"; exon_number |  |
| "1"; oId "CUFF.59737.7"; tss_id "TSS41843"; |   |   |   |                                                                    |  |
| chr20 Cufflinks exon61711344 61711455       | . | + | . | gene_id "XLOC_033194"; transcript_id "TCONS_00055369"; exon_number |  |
| "2"; oId "CUFF.59737.7"; tss_id "TSS41843"; |   |   |   |                                                                    |  |
| chr20 Cufflinks exon61711662 61712206       | . | + | . | gene_id "XLOC_033194"; transcript_id "TCONS_00055369"; exon_number |  |
| "3"; oId "CUFF.59737.7"; tss_id "TSS41843"; |   |   |   |                                                                    |  |
| chr20 Cufflinks exon61713534 61713622       | . | + | . | gene_id "XLOC_033194"; transcript_id "TCONS_00055369"; exon_number |  |
| "4"; oId "CUFF.59737.7"; tss_id "TSS41843"; |   |   |   |                                                                    |  |
| chr20 Cufflinks exon61714634 61714694       | . | + | . | gene_id "XLOC_033194"; transcript_id "TCONS_00055369"; exon_number |  |
| "5"; oId "CUFF.59737.7"; tss_id "TSS41843"; |   |   |   |                                                                    |  |
| chr20 Cufflinks exon61715223 61716243       | . | + | . | gene_id "XLOC_033194"; transcript_id "TCONS_00055369"; exon_number |  |
| "6"; oId "CUFF.59737.7"; tss_id "TSS41843"; |   |   |   |                                                                    |  |
| chr20 Cufflinks exon61716286 61717298       | . | + | . | gene_id "XLOC_033194"; transcript_id "TCONS_00055369"; exon_number |  |
| "7"; oId "CUFF.59737.7"; tss_id "TSS41843"; |   |   |   |                                                                    |  |
| chr20 Cufflinks exon61640735 61640825       | . | + | . | gene_id "XLOC_033194"; transcript_id "TCONS_00055370"; exon_number |  |
| "1"; oId "CUFF.59737.8"; tss_id "TSS41843"; |   |   |   |                                                                    |  |

|       |                        |          |   |   |   |                                                                                                                 |
|-------|------------------------|----------|---|---|---|-----------------------------------------------------------------------------------------------------------------|
| chr20 | Cufflinks exon61711344 | 61712298 | . | + | . | gene_id "XLOC_033194"; transcript_id "TCONS_00055370"; exon_number "2"; oId "CUFF.59737.8"; tss_id "TSS41843";  |
| chr20 | Cufflinks exon61713534 | 61714694 | . | + | . | gene_id "XLOC_033194"; transcript_id "TCONS_00055370"; exon_number "3"; oId "CUFF.59737.8"; tss_id "TSS41843";  |
| chr20 | Cufflinks exon61715223 | 61716243 | . | + | . | gene_id "XLOC_033194"; transcript_id "TCONS_00055370"; exon_number "4"; oId "CUFF.59737.8"; tss_id "TSS41843";  |
| chr20 | Cufflinks exon61716286 | 61717298 | . | + | . | gene_id "XLOC_033194"; transcript_id "TCONS_00055370"; exon_number "5"; oId "CUFF.59737.8"; tss_id "TSS41843";  |
| chr20 | Cufflinks exon61644953 | 61647227 | . | + | . | gene_id "XLOC_033194"; transcript_id "TCONS_00055371"; exon_number "1"; oId "CUFF.59737.9"; tss_id "TSS41844";  |
| chr20 | Cufflinks exon61647303 | 61659382 | . | + | . | gene_id "XLOC_033194"; transcript_id "TCONS_00055371"; exon_number "2"; oId "CUFF.59737.9"; tss_id "TSS41844";  |
| chr20 | Cufflinks exon61669363 | 61669537 | . | + | . | gene_id "XLOC_033194"; transcript_id "TCONS_00055374"; exon_number "1"; oId "CUFF.59737.10"; tss_id "TSS41845"; |
| chr20 | Cufflinks exon61680208 | 61680277 | . | + | . | gene_id "XLOC_033194"; transcript_id "TCONS_00055374"; exon_number "2"; oId "CUFF.59737.10"; tss_id "TSS41845"; |
| chr20 | Cufflinks exon61680864 | 61681008 | . | + | . | gene_id "XLOC_033194"; transcript_id "TCONS_00055374"; exon_number "3"; oId "CUFF.59737.10"; tss_id "TSS41845"; |
| chr20 | Cufflinks exon61682974 | 61683103 | . | + | . | gene_id "XLOC_033194"; transcript_id "TCONS_00055374"; exon_number "4"; oId "CUFF.59737.10"; tss_id "TSS41845"; |
| chr20 | Cufflinks exon61684257 | 61686772 | . | + | . | gene_id "XLOC_033194"; transcript_id "TCONS_00055374"; exon_number "5"; oId "CUFF.59737.10"; tss_id "TSS41845"; |
| chr20 | Cufflinks exon61683931 | 61684618 | . | + | . | gene_id "XLOC_033194"; transcript_id "TCONS_00055376"; exon_number "1"; oId "CUFF.59737.13"; tss_id "TSS41847"; |
| chr20 | Cufflinks exon61684864 | 61686772 | . | + | . | gene_id "XLOC_033194"; transcript_id "TCONS_00055376"; exon_number "2"; oId "CUFF.59737.13"; tss_id "TSS41847"; |
| chr20 | Cufflinks exon61659493 | 61660351 | . | + | . | gene_id "XLOC_033195"; transcript_id "TCONS_00055372"; exon_number "1"; oId "CUFF.59744.1"; tss_id "TSS41848";  |
| chr20 | Cufflinks exon61660569 | 61660633 | . | + | . | gene_id "XLOC_033195"; transcript_id "TCONS_00055372"; exon_number "2"; oId "CUFF.59744.1"; tss_id "TSS41848";  |
| chr20 | Cufflinks exon61732462 | 61732755 | . | + | . | gene_id "XLOC_033201"; transcript_id "TCONS_00055383"; exon_number "1"; oId "CUFF.59754.2"; tss_id "TSS41854";  |
| chr20 | Cufflinks exon61733461 | 61734606 | . | + | . | gene_id "XLOC_033201"; transcript_id "TCONS_00055383"; exon_number "2"; oId "CUFF.59754.2"; tss_id "TSS41854";  |
| chr20 | Cufflinks exon61734991 | 61735765 | . | + | . | gene_id "XLOC_033201"; transcript_id "TCONS_00055383"; exon_number "3"; oId "CUFF.59754.2"; tss_id "TSS41854";  |
| chr20 | Cufflinks exon61732462 | 61734606 | . | + | . | gene_id "XLOC_033201"; transcript_id "TCONS_00055382"; exon_number "1"; oId "CUFF.59754.1"; tss_id "TSS41854";  |
| chr20 | Cufflinks exon61734987 | 61735765 | . | + | . | gene_id "XLOC_033201"; transcript_id "TCONS_00055382"; exon_number "2"; oId "CUFF.59754.1"; tss_id "TSS41854";  |
| chr20 | Cufflinks exon61732644 | 61734606 | . | + | . | gene_id "XLOC_033201"; transcript_id "TCONS_00055384"; exon_number "1"; oId "CUFF.59754.3"; tss_id "TSS41855";  |
| chr20 | Cufflinks exon61734907 | 61735765 | . | + | . | gene_id "XLOC_033201"; transcript_id "TCONS_00055384"; exon_number "2"; oId "CUFF.59754.3"; tss_id "TSS41855";  |

"2"; oId "CUFF.59754.3"; tss\_id "TSS41855";  
chr20 Cufflinks exon62258588 62258745 . + . gene\_id "XLOC\_033216"; transcript\_id "TCONS\_00055413"; exon\_number  
"1"; oId "CUFF.59796.3"; tss\_id "TSS41874";  
chr20 Cufflinks exon62259622 62260177 . + . gene\_id "XLOC\_033216"; transcript\_id "TCONS\_00055413"; exon\_number  
"2"; oId "CUFF.59796.3"; tss\_id "TSS41874";  
chr20 Cufflinks exon62258588 62258745 . + . gene\_id "XLOC\_033216"; transcript\_id "TCONS\_00055412"; exon\_number  
"1"; oId "CUFF.59796.2"; tss\_id "TSS41874";  
chr20 Cufflinks exon62259543 62260177 . + . gene\_id "XLOC\_033216"; transcript\_id "TCONS\_00055412"; exon\_number  
"2"; oId "CUFF.59796.2"; tss\_id "TSS41874";  
chr20 Cufflinks exon62664976 62667400 . + . gene\_id "XLOC\_033226"; transcript\_id "TCONS\_00055429"; exon\_number  
"1"; oId "CUFF.59832.1"; tss\_id "TSS41885";  
chr20 Cufflinks exon62667490 62669555 . + . gene\_id "XLOC\_033226"; transcript\_id "TCONS\_00055429"; exon\_number  
"2"; oId "CUFF.59832.1"; tss\_id "TSS41885";  
chr20 Cufflinks exon62669649 62669801 . + . gene\_id "XLOC\_033226"; transcript\_id "TCONS\_00055429"; exon\_number  
"3"; oId "CUFF.59832.1"; tss\_id "TSS41885";  
chr20 Cufflinks exon62669975 62671315 . + . gene\_id "XLOC\_033226"; transcript\_id "TCONS\_00055429"; exon\_number  
"4"; oId "CUFF.59832.1"; tss\_id "TSS41885";  
chr20 Cufflinks exon62665697 62667400 . + . gene\_id "XLOC\_033226"; transcript\_id "TCONS\_00055430"; exon\_number  
"1"; oId "CUFF.59832.2"; tss\_id "TSS41886";  
chr20 Cufflinks exon62667490 62669555 . + . gene\_id "XLOC\_033226"; transcript\_id "TCONS\_00055430"; exon\_number  
"2"; oId "CUFF.59832.2"; tss\_id "TSS41886";  
chr20 Cufflinks exon62669852 62671315 . + . gene\_id "XLOC\_033226"; transcript\_id "TCONS\_00055430"; exon\_number  
"3"; oId "CUFF.59832.2"; tss\_id "TSS41886";  
chr20 Cufflinks exon1012033 1012142 . - . gene\_id "XLOC\_033263"; transcript\_id "TCONS\_00055495"; exon\_number "1"; oId  
"CUFF.57226.1"; tss\_id "TSS41933";  
chr20 Cufflinks exon1032944 1033089 . - . gene\_id "XLOC\_033263"; transcript\_id "TCONS\_00055495"; exon\_number "2"; oId  
"CUFF.57226.1"; tss\_id "TSS41933";  
chr20 Cufflinks exon1033415 1033605 . - . gene\_id "XLOC\_033263"; transcript\_id "TCONS\_00055495"; exon\_number "3"; oId  
"CUFF.57226.1"; tss\_id "TSS41933";  
chr20 Cufflinks exon1039873 1039971 . - . gene\_id "XLOC\_033263"; transcript\_id "TCONS\_00055495"; exon\_number "4"; oId  
"CUFF.57226.1"; tss\_id "TSS41933";  
chr20 Cufflinks exon1099027 1099153 . - . gene\_id "XLOC\_033263"; transcript\_id "TCONS\_00055495"; exon\_number "5"; oId  
"CUFF.57226.1"; tss\_id "TSS41933";  
chr20 Cufflinks exon1055367 1055524 . - . gene\_id "XLOC\_033263"; transcript\_id "TCONS\_00055498"; exon\_number "1"; oId  
"CUFF.57226.2"; tss\_id "TSS41933";  
chr20 Cufflinks exon1099027 1099126 . - . gene\_id "XLOC\_033263"; transcript\_id "TCONS\_00055498"; exon\_number "2"; oId  
"CUFF.57226.2"; tss\_id "TSS41933";  
chr20 Cufflinks exon2619894 2624856 . - . gene\_id "XLOC\_033292"; transcript\_id "TCONS\_00055543"; exon\_number "1"; oId  
"CUFF.57355.1"; tss\_id "TSS41968";  
chr20 Cufflinks exon2867329 2867348 . - . gene\_id "XLOC\_033292"; transcript\_id "TCONS\_00055543"; exon\_number "2"; oId  
"CUFF.57355.1"; tss\_id "TSS41968";  
chr20 Cufflinks exon9865364 9865580 . - . gene\_id "XLOC\_033363"; transcript\_id "TCONS\_00055668"; exon\_number "1"; oId  
"CUFF.57630.3"; tss\_id "TSS42060";

|       |                |          |          |   |   |   |                                                                                                                |
|-------|----------------|----------|----------|---|---|---|----------------------------------------------------------------------------------------------------------------|
| chr20 | Cufflinks exon | 9866732  | 9867116  | . | - | . | gene_id "XLOC_033363"; transcript_id "TCONS_00055668"; exon_number "2"; oId "CUFF.57630.3"; tss_id "TSS42060"; |
| chr20 | Cufflinks exon | 9870337  | 9870375  | . | - | . | gene_id "XLOC_033363"; transcript_id "TCONS_00055668"; exon_number "3"; oId "CUFF.57630.3"; tss_id "TSS42060"; |
| chr20 | Cufflinks exon | 9865364  | 9865580  | . | - | . | gene_id "XLOC_033363"; transcript_id "TCONS_00055669"; exon_number "1"; oId "CUFF.57630.1"; tss_id "TSS42060"; |
| chr20 | Cufflinks exon | 9870337  | 9870394  | . | - | . | gene_id "XLOC_033363"; transcript_id "TCONS_00055669"; exon_number "2"; oId "CUFF.57630.1"; tss_id "TSS42060"; |
| chr20 | Cufflinks exon | 13348675 | 13349756 | . | - | . | gene_id "XLOC_033412"; transcript_id "TCONS_00055723"; exon_number "1"; oId "CUFF.57789.2"; tss_id "TSS42113"; |
| chr20 | Cufflinks exon | 13364992 | 13365093 | . | - | . | gene_id "XLOC_033412"; transcript_id "TCONS_00055723"; exon_number "2"; oId "CUFF.57789.2"; tss_id "TSS42113"; |
| chr20 | Cufflinks exon | 17702235 | 17702267 | . | - | . | gene_id "XLOC_033426"; transcript_id "TCONS_00055759"; exon_number "1"; oId "CUFF.57839.1"; tss_id "TSS42135"; |
| chr20 | Cufflinks exon | 17943079 | 17943589 | . | - | . | gene_id "XLOC_033426"; transcript_id "TCONS_00055759"; exon_number "2"; oId "CUFF.57839.1"; tss_id "TSS42135"; |
| chr20 | Cufflinks exon | 22541192 | 22545754 | . | - | . | gene_id "XLOC_033453"; transcript_id "TCONS_00055802"; exon_number "1"; oId "CUFF.57951.2"; tss_id "TSS42168"; |
| chr20 | Cufflinks exon | 22547321 | 22547448 | . | - | . | gene_id "XLOC_033453"; transcript_id "TCONS_00055802"; exon_number "2"; oId "CUFF.57951.2"; tss_id "TSS42168"; |
| chr20 | Cufflinks exon | 22548432 | 22548523 | . | - | . | gene_id "XLOC_033453"; transcript_id "TCONS_00055802"; exon_number "3"; oId "CUFF.57951.2"; tss_id "TSS42168"; |
| chr20 | Cufflinks exon | 22559148 | 22559280 | . | - | . | gene_id "XLOC_033453"; transcript_id "TCONS_00055802"; exon_number "4"; oId "CUFF.57951.2"; tss_id "TSS42168"; |
| chr20 | Cufflinks exon | 22541192 | 22545754 | . | - | . | gene_id "XLOC_033453"; transcript_id "TCONS_00055801"; exon_number "1"; oId "CUFF.57951.1"; tss_id "TSS42168"; |
| chr20 | Cufflinks exon | 22547321 | 22547443 | . | - | . | gene_id "XLOC_033453"; transcript_id "TCONS_00055801"; exon_number "2"; oId "CUFF.57951.1"; tss_id "TSS42168"; |
| chr20 | Cufflinks exon | 22548432 | 22548523 | . | - | . | gene_id "XLOC_033453"; transcript_id "TCONS_00055801"; exon_number "3"; oId "CUFF.57951.1"; tss_id "TSS42168"; |
| chr20 | Cufflinks exon | 22559148 | 22559280 | . | - | . | gene_id "XLOC_033453"; transcript_id "TCONS_00055801"; exon_number "4"; oId "CUFF.57951.1"; tss_id "TSS42168"; |
| chr20 | Cufflinks exon | 23172360 | 23172465 | . | - | . | gene_id "XLOC_033466"; transcript_id "TCONS_00055818"; exon_number "1"; oId "CUFF.57967.1"; tss_id "TSS42182"; |
| chr20 | Cufflinks exon | 23297308 | 23297987 | . | - | . | gene_id "XLOC_033466"; transcript_id "TCONS_00055818"; exon_number "2"; oId "CUFF.57967.1"; tss_id "TSS42182"; |
| chr20 | Cufflinks exon | 23290067 | 23290337 | . | - | . | gene_id "XLOC_033466"; transcript_id "TCONS_00055832"; exon_number "1"; oId "CUFF.57967.3"; tss_id "TSS42182"; |
| chr20 | Cufflinks exon | 23290572 | 23290790 | . | - | . | gene_id "XLOC_033466"; transcript_id "TCONS_00055832"; exon_number "2"; oId "CUFF.57967.3"; tss_id "TSS42182"; |
| chr20 | Cufflinks exon | 23297308 | 23297987 | . | - | . | gene_id "XLOC_033466"; transcript_id "TCONS_00055832"; exon_number "3"; oId "CUFF.57967.3"; tss_id "TSS42182"; |
| chr20 | Cufflinks exon | 23290067 | 23290790 | . | - | . | gene_id "XLOC_033466"; transcript_id "TCONS_00055831"; exon_number                                             |



|                                              |                |          |          |   |   |   |                                                                    |
|----------------------------------------------|----------------|----------|----------|---|---|---|--------------------------------------------------------------------|
| chr20                                        | Cufflinks exon | 25070396 | 25070864 | . | - | . | gene_id "XLOC_033518"; transcript_id "TCONS_00055889"; exon_number |
| "2"; oId "CUFF.58058.4"; tss_id "TSS42239";  |                |          |          |   |   |   |                                                                    |
| chr20                                        | Cufflinks exon | 25071359 | 25071406 | . | - | . | gene_id "XLOC_033518"; transcript_id "TCONS_00055889"; exon_number |
| "3"; oId "CUFF.58058.4"; tss_id "TSS42239";  |                |          |          |   |   |   |                                                                    |
| chr20                                        | Cufflinks exon | 25067723 | 25070245 | . | - | . | gene_id "XLOC_033518"; transcript_id "TCONS_00055890"; exon_number |
| "1"; oId "CUFF.58058.2"; tss_id "TSS42240";  |                |          |          |   |   |   |                                                                    |
| chr20                                        | Cufflinks exon | 25070396 | 25070864 | . | - | . | gene_id "XLOC_033518"; transcript_id "TCONS_00055890"; exon_number |
| "2"; oId "CUFF.58058.2"; tss_id "TSS42240";  |                |          |          |   |   |   |                                                                    |
| chr20                                        | Cufflinks exon | 25071479 | 25071757 | . | - | . | gene_id "XLOC_033518"; transcript_id "TCONS_00055890"; exon_number |
| "3"; oId "CUFF.58058.2"; tss_id "TSS42240";  |                |          |          |   |   |   |                                                                    |
| chr20                                        | Cufflinks exon | 25072399 | 25072497 | . | - | . | gene_id "XLOC_033518"; transcript_id "TCONS_00055890"; exon_number |
| "4"; oId "CUFF.58058.2"; tss_id "TSS42240";  |                |          |          |   |   |   |                                                                    |
| chr20                                        | Cufflinks exon | 25067723 | 25070864 | . | - | . | gene_id "XLOC_033518"; transcript_id "TCONS_00055891"; exon_number |
| "1"; oId "CUFF.58058.5"; tss_id "TSS42240";  |                |          |          |   |   |   |                                                                    |
| chr20                                        | Cufflinks exon | 25071479 | 25071735 | . | - | . | gene_id "XLOC_033518"; transcript_id "TCONS_00055891"; exon_number |
| "2"; oId "CUFF.58058.5"; tss_id "TSS42240";  |                |          |          |   |   |   |                                                                    |
| chr20                                        | Cufflinks exon | 25072399 | 25072525 | . | - | . | gene_id "XLOC_033518"; transcript_id "TCONS_00055891"; exon_number |
| "3"; oId "CUFF.58058.5"; tss_id "TSS42240";  |                |          |          |   |   |   |                                                                    |
| chr20                                        | Cufflinks exon | 25825303 | 25831948 | . | - | . | gene_id "XLOC_033538"; transcript_id "TCONS_00055929"; exon_number |
| "1"; oId "CUFF.58145.12"; tss_id "TSS42268"; |                |          |          |   |   |   |                                                                    |
| chr20                                        | Cufflinks exon | 25832734 | 25834698 | . | - | . | gene_id "XLOC_033538"; transcript_id "TCONS_00055929"; exon_number |
| "2"; oId "CUFF.58145.12"; tss_id "TSS42268"; |                |          |          |   |   |   |                                                                    |
| chr20                                        | Cufflinks exon | 25825303 | 25829584 | . | - | . | gene_id "XLOC_033538"; transcript_id "TCONS_00055928"; exon_number |
| "1"; oId "CUFF.58145.11"; tss_id "TSS42268"; |                |          |          |   |   |   |                                                                    |
| chr20                                        | Cufflinks exon | 25831873 | 25831948 | . | - | . | gene_id "XLOC_033538"; transcript_id "TCONS_00055928"; exon_number |
| "2"; oId "CUFF.58145.11"; tss_id "TSS42268"; |                |          |          |   |   |   |                                                                    |
| chr20                                        | Cufflinks exon | 25832734 | 25834698 | . | - | . | gene_id "XLOC_033538"; transcript_id "TCONS_00055928"; exon_number |
| "3"; oId "CUFF.58145.11"; tss_id "TSS42268"; |                |          |          |   |   |   |                                                                    |
| chr20                                        | Cufflinks exon | 31554634 | 31555045 | . | - | . | gene_id "XLOC_033565"; transcript_id "TCONS_00055984"; exon_number |
| "1"; oId "CUFF.58309.2"; tss_id "TSS42312";  |                |          |          |   |   |   |                                                                    |
| chr20                                        | Cufflinks exon | 31555403 | 31555714 | . | - | . | gene_id "XLOC_033565"; transcript_id "TCONS_00055984"; exon_number |
| "2"; oId "CUFF.58309.2"; tss_id "TSS42312";  |                |          |          |   |   |   |                                                                    |
| chr20                                        | Cufflinks exon | 31554634 | 31555048 | . | - | . | gene_id "XLOC_033565"; transcript_id "TCONS_00055983"; exon_number |
| "1"; oId "CUFF.58309.1"; tss_id "TSS42312";  |                |          |          |   |   |   |                                                                    |
| chr20                                        | Cufflinks exon | 31555403 | 31555714 | . | - | . | gene_id "XLOC_033565"; transcript_id "TCONS_00055983"; exon_number |
| "2"; oId "CUFF.58309.1"; tss_id "TSS42312";  |                |          |          |   |   |   |                                                                    |
| chr20                                        | Cufflinks exon | 32577824 | 32580711 | . | - | . | gene_id "XLOC_033582"; transcript_id "TCONS_00056004"; exon_number |
| "1"; oId "CUFF.58358.4"; tss_id "TSS42331";  |                |          |          |   |   |   |                                                                    |
| chr20                                        | Cufflinks exon | 32580866 | 32580956 | . | - | . | gene_id "XLOC_033582"; transcript_id "TCONS_00056004"; exon_number |
| "2"; oId "CUFF.58358.4"; tss_id "TSS42331";  |                |          |          |   |   |   |                                                                    |
| chr20                                        | Cufflinks exon | 32582011 | 32582218 | . | - | . | gene_id "XLOC_033582"; transcript_id "TCONS_00056004"; exon_number |
| "3"; oId "CUFF.58358.4"; tss_id "TSS42331";  |                |          |          |   |   |   |                                                                    |
| chr20                                        | Cufflinks exon | 33864136 | 33865735 | . | - | . | gene_id "XLOC_033608"; transcript_id "TCONS_00056049"; exon_number |

|                                              |       |                        |          |   |   |   |                                                                    |
|----------------------------------------------|-------|------------------------|----------|---|---|---|--------------------------------------------------------------------|
| "1"; oId "CUFF.58447.2"; tss_id "TSS42363";  | chr20 | Cufflinks exon33865849 | 33865960 | . | - | . | gene_id "XLOC_033608"; transcript_id "TCONS_00056049"; exon_number |
| "2"; oId "CUFF.58447.2"; tss_id "TSS42363";  | chr20 | Cufflinks exon33864136 | 33865735 | . | - | . | gene_id "XLOC_033608"; transcript_id "TCONS_00056048"; exon_number |
| "1"; oId "CUFF.58447.1"; tss_id "TSS42363";  | chr20 | Cufflinks exon33865812 | 33865960 | . | - | . | gene_id "XLOC_033608"; transcript_id "TCONS_00056048"; exon_number |
| "2"; oId "CUFF.58447.1"; tss_id "TSS42363";  | chr20 | Cufflinks exon36129472 | 36130956 | . | - | . | gene_id "XLOC_033648"; transcript_id "TCONS_00056130"; exon_number |
| "1"; oId "CUFF.58584.1"; tss_id "TSS42422";  | chr20 | Cufflinks exon36137506 | 36137691 | . | - | . | gene_id "XLOC_033648"; transcript_id "TCONS_00056130"; exon_number |
| "2"; oId "CUFF.58584.1"; tss_id "TSS42422";  | chr20 | Cufflinks exon36138739 | 36145638 | . | - | . | gene_id "XLOC_033648"; transcript_id "TCONS_00056130"; exon_number |
| "3"; oId "CUFF.58584.1"; tss_id "TSS42422";  | chr20 | Cufflinks exon36129472 | 36130956 | . | - | . | gene_id "XLOC_033648"; transcript_id "TCONS_00056131"; exon_number |
| "1"; oId "CUFF.58584.3"; tss_id "TSS42422";  | chr20 | Cufflinks exon36137506 | 36145639 | . | - | . | gene_id "XLOC_033648"; transcript_id "TCONS_00056131"; exon_number |
| "2"; oId "CUFF.58584.3"; tss_id "TSS42422";  | chr20 | Cufflinks exon37033173 | 37034969 | . | - | . | gene_id "XLOC_033654"; transcript_id "TCONS_00056137"; exon_number |
| "1"; oId "CUFF.58623.2"; tss_id "TSS42428";  | chr20 | Cufflinks exon37042200 | 37042315 | . | - | . | gene_id "XLOC_033654"; transcript_id "TCONS_00056137"; exon_number |
| "2"; oId "CUFF.58623.2"; tss_id "TSS42428";  | chr20 | Cufflinks exon37043753 | 37043875 | . | - | . | gene_id "XLOC_033654"; transcript_id "TCONS_00056137"; exon_number |
| "3"; oId "CUFF.58623.2"; tss_id "TSS42428";  | chr20 | Cufflinks exon37048221 | 37048327 | . | - | . | gene_id "XLOC_033654"; transcript_id "TCONS_00056137"; exon_number |
| "4"; oId "CUFF.58623.2"; tss_id "TSS42428";  | chr20 | Cufflinks exon37049180 | 37049547 | . | - | . | gene_id "XLOC_033654"; transcript_id "TCONS_00056137"; exon_number |
| "5"; oId "CUFF.58623.2"; tss_id "TSS42428";  | chr20 | Cufflinks exon37049653 | 37049746 | . | - | . | gene_id "XLOC_033654"; transcript_id "TCONS_00056137"; exon_number |
| "6"; oId "CUFF.58623.2"; tss_id "TSS42428";  | chr20 | Cufflinks exon37050739 | 37050889 | . | - | . | gene_id "XLOC_033654"; transcript_id "TCONS_00056137"; exon_number |
| "7"; oId "CUFF.58623.2"; tss_id "TSS42428";  | chr20 | Cufflinks exon37054584 | 37054696 | . | - | . | gene_id "XLOC_033654"; transcript_id "TCONS_00056137"; exon_number |
| "8"; oId "CUFF.58623.2"; tss_id "TSS42428";  | chr20 | Cufflinks exon37055062 | 37055147 | . | - | . | gene_id "XLOC_033654"; transcript_id "TCONS_00056137"; exon_number |
| "9"; oId "CUFF.58623.2"; tss_id "TSS42428";  | chr20 | Cufflinks exon37056323 | 37062327 | . | - | . | gene_id "XLOC_033654"; transcript_id "TCONS_00056137"; exon_number |
| "10"; oId "CUFF.58623.2"; tss_id "TSS42428"; | chr20 | Cufflinks exon37831881 | 37838051 | . | - | . | gene_id "XLOC_033661"; transcript_id "TCONS_00056146"; exon_number |
| "1"; oId "CUFF.58660.1"; tss_id "TSS42436";  | chr20 | Cufflinks exon37842672 | 37843461 | . | - | . | gene_id "XLOC_033661"; transcript_id "TCONS_00056146"; exon_number |
| "2"; oId "CUFF.58660.1"; tss_id "TSS42436";  | chr20 | Cufflinks exon37844190 | 37844305 | . | - | . | gene_id "XLOC_033661"; transcript_id "TCONS_00056146"; exon_number |
| "3"; oId "CUFF.58660.1"; tss_id "TSS42436";  |       |                        |          |   |   |   |                                                                    |



|       |                |          |          |   |   |   |                                                                                                                |
|-------|----------------|----------|----------|---|---|---|----------------------------------------------------------------------------------------------------------------|
| chr20 | Cufflinks exon | 37844590 | 37844755 | . | - | . | gene_id "XLOC_033661"; transcript_id "TCONS_00056146"; exon_number "4"; oId "CUFF.58660.1"; tss_id "TSS42436"; |
| chr20 | Cufflinks exon | 37853198 | 37860915 | . | - | . | gene_id "XLOC_033661"; transcript_id "TCONS_00056146"; exon_number "5"; oId "CUFF.58660.1"; tss_id "TSS42436"; |
| chr20 | Cufflinks exon | 37861283 | 37862681 | . | - | . | gene_id "XLOC_033661"; transcript_id "TCONS_00056146"; exon_number "6"; oId "CUFF.58660.1"; tss_id "TSS42436"; |
| chr20 | Cufflinks exon | 37838054 | 37841931 | . | - | . | gene_id "XLOC_033661"; transcript_id "TCONS_00056147"; exon_number "1"; oId "CUFF.58660.2"; tss_id "TSS42436"; |
| chr20 | Cufflinks exon | 37844598 | 37844755 | . | - | . | gene_id "XLOC_033661"; transcript_id "TCONS_00056147"; exon_number "2"; oId "CUFF.58660.2"; tss_id "TSS42436"; |
| chr20 | Cufflinks exon | 37853198 | 37860917 | . | - | . | gene_id "XLOC_033661"; transcript_id "TCONS_00056147"; exon_number "3"; oId "CUFF.58660.2"; tss_id "TSS42436"; |
| chr20 | Cufflinks exon | 37861283 | 37861359 | . | - | . | gene_id "XLOC_033661"; transcript_id "TCONS_00056147"; exon_number "4"; oId "CUFF.58660.2"; tss_id "TSS42436"; |
| chr20 | Cufflinks exon | 37861490 | 37862681 | . | - | . | gene_id "XLOC_033661"; transcript_id "TCONS_00056147"; exon_number "5"; oId "CUFF.58660.2"; tss_id "TSS42436"; |
| chr20 | Cufflinks exon | 37842424 | 37843461 | . | - | . | gene_id "XLOC_033661"; transcript_id "TCONS_00056148"; exon_number "1"; oId "CUFF.58660.3"; tss_id "TSS42437"; |
| chr20 | Cufflinks exon | 37844190 | 37844305 | . | - | . | gene_id "XLOC_033661"; transcript_id "TCONS_00056148"; exon_number "2"; oId "CUFF.58660.3"; tss_id "TSS42437"; |
| chr20 | Cufflinks exon | 37844590 | 37844755 | . | - | . | gene_id "XLOC_033661"; transcript_id "TCONS_00056148"; exon_number "3"; oId "CUFF.58660.3"; tss_id "TSS42437"; |
| chr20 | Cufflinks exon | 37853198 | 37853391 | . | - | . | gene_id "XLOC_033661"; transcript_id "TCONS_00056148"; exon_number "4"; oId "CUFF.58660.3"; tss_id "TSS42437"; |
| chr20 | Cufflinks exon | 37846084 | 37860513 | . | - | . | gene_id "XLOC_033661"; transcript_id "TCONS_00056149"; exon_number "1"; oId "CUFF.58660.4"; tss_id "TSS42436"; |
| chr20 | Cufflinks exon | 37860612 | 37862681 | . | - | . | gene_id "XLOC_033661"; transcript_id "TCONS_00056149"; exon_number "2"; oId "CUFF.58660.4"; tss_id "TSS42436"; |
| chr20 | Cufflinks exon | 39324157 | 39326762 | . | - | . | gene_id "XLOC_033680"; transcript_id "TCONS_00056170"; exon_number "1"; oId "CUFF.58699.2"; tss_id "TSS42457"; |
| chr20 | Cufflinks exon | 39339405 | 39339636 | . | - | . | gene_id "XLOC_033680"; transcript_id "TCONS_00056170"; exon_number "2"; oId "CUFF.58699.2"; tss_id "TSS42457"; |
| chr20 | Cufflinks exon | 39342952 | 39343072 | . | - | . | gene_id "XLOC_033680"; transcript_id "TCONS_00056170"; exon_number "3"; oId "CUFF.58699.2"; tss_id "TSS42457"; |
| chr20 | Cufflinks exon | 39345538 | 39345607 | . | - | . | gene_id "XLOC_033680"; transcript_id "TCONS_00056170"; exon_number "4"; oId "CUFF.58699.2"; tss_id "TSS42457"; |
| chr20 | Cufflinks exon | 39345698 | 39345962 | . | - | . | gene_id "XLOC_033680"; transcript_id "TCONS_00056170"; exon_number "5"; oId "CUFF.58699.2"; tss_id "TSS42457"; |
| chr20 | Cufflinks exon | 39365217 | 39365302 | . | - | . | gene_id "XLOC_033680"; transcript_id "TCONS_00056170"; exon_number "6"; oId "CUFF.58699.2"; tss_id "TSS42457"; |
| chr20 | Cufflinks exon | 39324157 | 39326762 | . | - | . | gene_id "XLOC_033680"; transcript_id "TCONS_00056171"; exon_number "1"; oId "CUFF.58699.1"; tss_id "TSS42458"; |
| chr20 | Cufflinks exon | 39339405 | 39339636 | . | - | . | gene_id "XLOC_033680"; transcript_id "TCONS_00056171"; exon_number "1"; oId "CUFF.58699.1"; tss_id "TSS42458"; |

|                                             |   |   |   |                                                                    |  |
|---------------------------------------------|---|---|---|--------------------------------------------------------------------|--|
| "2"; oId "CUFF.58699.1"; tss_id "TSS42458"; |   |   |   |                                                                    |  |
| chr20 Cufflinks exon39342952 39343072       | . | - | . | gene_id "XLOC_033680"; transcript_id "TCONS_00056171"; exon_number |  |
| "3"; oId "CUFF.58699.1"; tss_id "TSS42458"; |   |   |   |                                                                    |  |
| chr20 Cufflinks exon39345538 39345607       | . | - | . | gene_id "XLOC_033680"; transcript_id "TCONS_00056171"; exon_number |  |
| "4"; oId "CUFF.58699.1"; tss_id "TSS42458"; |   |   |   |                                                                    |  |
| chr20 Cufflinks exon39345698 39345962       | . | - | . | gene_id "XLOC_033680"; transcript_id "TCONS_00056171"; exon_number |  |
| "5"; oId "CUFF.58699.1"; tss_id "TSS42458"; |   |   |   |                                                                    |  |
| chr20 Cufflinks exon39385846 39386033       | . | - | . | gene_id "XLOC_033680"; transcript_id "TCONS_00056171"; exon_number |  |
| "6"; oId "CUFF.58699.1"; tss_id "TSS42458"; |   |   |   |                                                                    |  |
| chr20 Cufflinks exon39324157 39326762       | . | - | . | gene_id "XLOC_033680"; transcript_id "TCONS_00056172"; exon_number |  |
| "1"; oId "CUFF.58699.3"; tss_id "TSS42459"; |   |   |   |                                                                    |  |
| chr20 Cufflinks exon39339405 39339636       | . | - | . | gene_id "XLOC_033680"; transcript_id "TCONS_00056172"; exon_number |  |
| "2"; oId "CUFF.58699.3"; tss_id "TSS42459"; |   |   |   |                                                                    |  |
| chr20 Cufflinks exon39342952 39343072       | . | - | . | gene_id "XLOC_033680"; transcript_id "TCONS_00056172"; exon_number |  |
| "3"; oId "CUFF.58699.3"; tss_id "TSS42459"; |   |   |   |                                                                    |  |
| chr20 Cufflinks exon39345538 39345607       | . | - | . | gene_id "XLOC_033680"; transcript_id "TCONS_00056172"; exon_number |  |
| "4"; oId "CUFF.58699.3"; tss_id "TSS42459"; |   |   |   |                                                                    |  |
| chr20 Cufflinks exon39345698 39345962       | . | - | . | gene_id "XLOC_033680"; transcript_id "TCONS_00056172"; exon_number |  |
| "5"; oId "CUFF.58699.3"; tss_id "TSS42459"; |   |   |   |                                                                    |  |
| chr20 Cufflinks exon39430061 39430200       | . | - | . | gene_id "XLOC_033680"; transcript_id "TCONS_00056172"; exon_number |  |
| "6"; oId "CUFF.58699.3"; tss_id "TSS42459"; |   |   |   |                                                                    |  |
| chr20 Cufflinks exon39510622 39510824       | . | - | . | gene_id "XLOC_033680"; transcript_id "TCONS_00056172"; exon_number |  |
| "7"; oId "CUFF.58699.3"; tss_id "TSS42459"; |   |   |   |                                                                    |  |
| chr20 Cufflinks exon39517993 39518015       | . | - | . | gene_id "XLOC_033680"; transcript_id "TCONS_00056172"; exon_number |  |
| "8"; oId "CUFF.58699.3"; tss_id "TSS42459"; |   |   |   |                                                                    |  |
| chr20 Cufflinks exon39339143 39339636       | . | - | . | gene_id "XLOC_033680"; transcript_id "TCONS_00056177"; exon_number |  |
| "1"; oId "CUFF.58699.6"; tss_id "TSS42457"; |   |   |   |                                                                    |  |
| chr20 Cufflinks exon39342952 39343072       | . | - | . | gene_id "XLOC_033680"; transcript_id "TCONS_00056177"; exon_number |  |
| "2"; oId "CUFF.58699.6"; tss_id "TSS42457"; |   |   |   |                                                                    |  |
| chr20 Cufflinks exon39345538 39345607       | . | - | . | gene_id "XLOC_033680"; transcript_id "TCONS_00056177"; exon_number |  |
| "3"; oId "CUFF.58699.6"; tss_id "TSS42457"; |   |   |   |                                                                    |  |
| chr20 Cufflinks exon39345698 39345962       | . | - | . | gene_id "XLOC_033680"; transcript_id "TCONS_00056177"; exon_number |  |
| "4"; oId "CUFF.58699.6"; tss_id "TSS42457"; |   |   |   |                                                                    |  |
| chr20 Cufflinks exon39365181 39365279       | . | - | . | gene_id "XLOC_033680"; transcript_id "TCONS_00056177"; exon_number |  |
| "5"; oId "CUFF.58699.6"; tss_id "TSS42457"; |   |   |   |                                                                    |  |
| chr20 Cufflinks exon39339143 39339636       | . | - | . | gene_id "XLOC_033680"; transcript_id "TCONS_00056178"; exon_number |  |
| "1"; oId "CUFF.58699.5"; tss_id "TSS42460"; |   |   |   |                                                                    |  |
| chr20 Cufflinks exon39342952 39343072       | . | - | . | gene_id "XLOC_033680"; transcript_id "TCONS_00056178"; exon_number |  |
| "2"; oId "CUFF.58699.5"; tss_id "TSS42460"; |   |   |   |                                                                    |  |
| chr20 Cufflinks exon39345538 39345607       | . | - | . | gene_id "XLOC_033680"; transcript_id "TCONS_00056178"; exon_number |  |
| "3"; oId "CUFF.58699.5"; tss_id "TSS42460"; |   |   |   |                                                                    |  |
| chr20 Cufflinks exon39510622 39511058       | . | - | . | gene_id "XLOC_033680"; transcript_id "TCONS_00056178"; exon_number |  |
| "4"; oId "CUFF.58699.5"; tss_id "TSS42460"; |   |   |   |                                                                    |  |

|       |                                                         |          |   |   |   |                                                                    |
|-------|---------------------------------------------------------|----------|---|---|---|--------------------------------------------------------------------|
| chr20 | Cufflinks exon39373864                                  | 39376053 | . | - | . | gene_id "XLOC_033680"; transcript_id "TCONS_00056183"; exon_number |
|       | "1"; oId "CUFF.58699.9"; tss_id "TSS42461";             |          |   |   |   |                                                                    |
| chr20 | Cufflinks exon39376641                                  | 39376717 | . | - | . | gene_id "XLOC_033680"; transcript_id "TCONS_00056183"; exon_number |
|       | "2"; oId "CUFF.58699.9"; tss_id "TSS42461";             |          |   |   |   |                                                                    |
| chr20 | Cufflinks exon39377252                                  | 39378839 | . | - | . | gene_id "XLOC_033680"; transcript_id "TCONS_00056183"; exon_number |
|       | "3"; oId "CUFF.58699.9"; tss_id "TSS42461";             |          |   |   |   |                                                                    |
| chr20 | Cufflinks exon39373864                                  | 39376714 | . | - | . | gene_id "XLOC_033680"; transcript_id "TCONS_00056184"; exon_number |
|       | "1"; oId "CUFF.58699.8"; tss_id "TSS42462";             |          |   |   |   |                                                                    |
| chr20 | Cufflinks exon39384952                                  | 39385327 | . | - | . | gene_id "XLOC_033680"; transcript_id "TCONS_00056184"; exon_number |
|       | "2"; oId "CUFF.58699.8"; tss_id "TSS42462";             |          |   |   |   |                                                                    |
| chr20 | Cufflinks exon39373864                                  | 39376053 | . | - | . | gene_id "XLOC_033680"; transcript_id "TCONS_00056185"; exon_number |
|       | "1"; oId "CUFF.58699.7"; tss_id "TSS42458";             |          |   |   |   |                                                                    |
| chr20 | Cufflinks exon39376641                                  | 39376714 | . | - | . | gene_id "XLOC_033680"; transcript_id "TCONS_00056185"; exon_number |
|       | "2"; oId "CUFF.58699.7"; tss_id "TSS42458";             |          |   |   |   |                                                                    |
| chr20 | Cufflinks exon39377249                                  | 39377331 | . | - | . | gene_id "XLOC_033680"; transcript_id "TCONS_00056185"; exon_number |
|       | "3"; oId "CUFF.58699.7"; tss_id "TSS42458";             |          |   |   |   |                                                                    |
| chr20 | Cufflinks exon39385619                                  | 39386113 | . | - | . | gene_id "XLOC_033680"; transcript_id "TCONS_00056185"; exon_number |
|       | "4"; oId "CUFF.58699.7"; tss_id "TSS42458";             |          |   |   |   |                                                                    |
| chr20 | Cufflinks exon39506053                                  | 39506759 | . | - | . | gene_id "XLOC_033680"; transcript_id "TCONS_00056196"; exon_number |
|       | "1"; oId "CUFF.58699.11"; tss_id "TSS42463";            |          |   |   |   |                                                                    |
| chr20 | Cufflinks exon39510622                                  | 39516153 | . | - | . | gene_id "XLOC_033680"; transcript_id "TCONS_00056196"; exon_number |
|       | "2"; oId "CUFF.58699.11"; tss_id "TSS42463";            |          |   |   |   |                                                                    |
| chr20 | Cufflinks exon44642062                                  | 44643427 | . | - | . | gene_id "XLOC_033748"; transcript_id "TCONS_00056277"; exon_number |
|       | "1"; oId "CUFF.58946.2"; tss_id "TSS42548";             |          |   |   |   |                                                                    |
| chr20 | Cufflinks exon44650163                                  | 44650211 | . | - | . | gene_id "XLOC_033748"; transcript_id "TCONS_00056277"; exon_number |
|       | "2"; oId "CUFF.58946.2"; tss_id "TSS42548";             |          |   |   |   |                                                                    |
| chr20 | Cufflinks exon44642062                                  | 44643179 | . | - | . | gene_id "XLOC_033748"; transcript_id "TCONS_00056278"; exon_number |
|       | "1"; oId "CUFF.58946.1"; tss_id "TSS42549";             |          |   |   |   |                                                                    |
| chr20 | Cufflinks exon44650163                                  | 44650536 | . | - | . | gene_id "XLOC_033748"; transcript_id "TCONS_00056278"; exon_number |
|       | "2"; oId "CUFF.58946.1"; tss_id "TSS42549";             |          |   |   |   |                                                                    |
| chr20 | Cufflinks exon45394012                                  | 45394463 | . | - | . | gene_id "XLOC_033759"; transcript_id "TCONS_00056304"; exon_number |
|       | "1"; oId "CUFF.58972.1"; tss_id "TSS42565";             |          |   |   |   |                                                                    |
| chr20 | Cufflinks exon45397904                                  | 45398370 | . | - | . | gene_id "XLOC_033759"; transcript_id "TCONS_00056304"; exon_number |
|       | "2"; oId "CUFF.58972.1"; tss_id "TSS42565";             |          |   |   |   |                                                                    |
| chr20 | Cufflinks exon45394012                                  | 45394463 | . | - | . | gene_id "XLOC_033759"; transcript_id "TCONS_00056305"; exon_number |
|       | "1"; oId "CUFF.58972.2"; tss_id "TSS42566";             |          |   |   |   |                                                                    |
| chr20 | Cufflinks exon45399055                                  | 45399093 | . | - | . | gene_id "XLOC_033759"; transcript_id "TCONS_00056305"; exon_number |
|       | "2"; oId "CUFF.58972.2"; tss_id "TSS42566";             |          |   |   |   |                                                                    |
| chr20 | Cufflinks exon55958776                                  | 55959971 | . | - | . | gene_id "XLOC_033824"; transcript_id "TCONS_00056425"; exon_number |
|       | "1"; oId "CUFF.59235.3"; tss_id "TSS42650";             |          |   |   |   |                                                                    |
| chr20 | Cufflinks exon 55960804                                 | 55961047 | . | - | . | gene_id "XLOC_033824"; transcript_id "TCONS_00056425";             |
|       | exon_number "2"; oId "CUFF.59235.3"; tss_id "TSS42650"; |          |   |   |   |                                                                    |
| chr20 | Cufflinks exon 55958776                                 | 55959971 | . | - | . | gene_id "XLOC_033824"; transcript_id "TCONS_00056427";             |

|                                                         |                                          |     |                                                        |
|---------------------------------------------------------|------------------------------------------|-----|--------------------------------------------------------|
| exon_number "1"; oId "CUFF.59235.2"; tss_id "TSS42651"; | chr20 Cufflinks exon 55965795 55965996 . | - . | gene_id "XLOC_033824"; transcript_id "TCONS_00056427"; |
| exon_number "2"; oId "CUFF.59235.2"; tss_id "TSS42651"; | chr20 Cufflinks exon 55958776 55959971 . | - . | gene_id "XLOC_033824"; transcript_id "TCONS_00056426"; |
| exon_number "1"; oId "CUFF.59235.1"; tss_id "TSS42651"; | chr20 Cufflinks exon 55963234 55963351 . | - . | gene_id "XLOC_033824"; transcript_id "TCONS_00056426"; |
| exon_number "2"; oId "CUFF.59235.1"; tss_id "TSS42651"; | chr20 Cufflinks exon 55965795 55965996 . | - . | gene_id "XLOC_033824"; transcript_id "TCONS_00056426"; |
| exon_number "3"; oId "CUFF.59235.1"; tss_id "TSS42651"; | chr20 Cufflinks exon 56739093 56739714 . | - . | gene_id "XLOC_033846"; transcript_id "TCONS_00056460"; |
| exon_number "1"; oId "CUFF.59319.2"; tss_id "TSS42679"; | chr20 Cufflinks exon 56746631 56746727 . | - . | gene_id "XLOC_033846"; transcript_id "TCONS_00056460"; |
| exon_number "2"; oId "CUFF.59319.2"; tss_id "TSS42679"; | chr20 Cufflinks exon 56747123 56747293 . | - . | gene_id "XLOC_033846"; transcript_id "TCONS_00056460"; |
| exon_number "3"; oId "CUFF.59319.2"; tss_id "TSS42679"; | chr20 Cufflinks exon 56739093 56739714 . | - . | gene_id "XLOC_033846"; transcript_id "TCONS_00056459"; |
| exon_number "1"; oId "CUFF.59319.1"; tss_id "TSS42679"; | chr20 Cufflinks exon 56747123 56747293 . | - . | gene_id "XLOC_033846"; transcript_id "TCONS_00056459"; |
| exon_number "2"; oId "CUFF.59319.1"; tss_id "TSS42679"; | chr20 Cufflinks exon 56739093 56739714 . | - . | gene_id "XLOC_033846"; transcript_id "TCONS_00056462"; |
| exon_number "1"; oId "CUFF.59319.4"; tss_id "TSS42680"; | chr20 Cufflinks exon 56754404 56754512 . | - . | gene_id "XLOC_033846"; transcript_id "TCONS_00056462"; |
| exon_number "2"; oId "CUFF.59319.4"; tss_id "TSS42680"; | chr20 Cufflinks exon 56754677 56754716 . | - . | gene_id "XLOC_033846"; transcript_id "TCONS_00056462"; |
| exon_number "3"; oId "CUFF.59319.4"; tss_id "TSS42680"; | chr20 Cufflinks exon 56739093 56739714 . | - . | gene_id "XLOC_033846"; transcript_id "TCONS_00056461"; |
| exon_number "1"; oId "CUFF.59319.3"; tss_id "TSS42680"; | chr20 Cufflinks exon 56754404 56754512 . | - . | gene_id "XLOC_033846"; transcript_id "TCONS_00056461"; |
| exon_number "2"; oId "CUFF.59319.3"; tss_id "TSS42680"; | chr20 Cufflinks exon 56754648 56754716 . | - . | gene_id "XLOC_033846"; transcript_id "TCONS_00056461"; |
| exon_number "3"; oId "CUFF.59319.3"; tss_id "TSS42680"; | chr20 Cufflinks exon 56803993 56806983 . | - . | gene_id "XLOC_033849"; transcript_id "TCONS_00056465"; |
| exon_number "1"; oId "CUFF.59322.4"; tss_id "TSS42683"; | chr20 Cufflinks exon 56807744 56807981 . | - . | gene_id "XLOC_033849"; transcript_id "TCONS_00056465"; |
| exon_number "2"; oId "CUFF.59322.4"; tss_id "TSS42683"; | chr20 Cufflinks exon 56810296 56810430 . | - . | gene_id "XLOC_033849"; transcript_id "TCONS_00056465"; |
| exon_number "3"; oId "CUFF.59322.4"; tss_id "TSS42683"; | chr20 Cufflinks exon 56811210 56811330 . | - . | gene_id "XLOC_033849"; transcript_id "TCONS_00056465"; |
| exon_number "4"; oId "CUFF.59322.4"; tss_id "TSS42683"; | chr20 Cufflinks exon 56812132 56812457 . | - . | gene_id "XLOC_033849"; transcript_id "TCONS_00056465"; |
| exon_number "5"; oId "CUFF.59322.4"; tss_id "TSS42683"; | chr20 Cufflinks exon 57392190 57394310 . | - . | gene_id "XLOC_033857"; transcript_id "TCONS_00056482"; |
| exon_number "1"; oId "CUFF.59379.6"; tss_id "TSS42694"; |                                          |     |                                                        |



exon\_number "4"; oId "CUFF.59379.2"; tss\_id "TSS42694";  
chr20 Cufflinks exon 57392190 57394310 . - . gene\_id "XLOC\_033857"; transcript\_id "TCONS\_00056483";  
exon\_number "1"; oId "CUFF.59379.1"; tss\_id "TSS42694";  
chr20 Cufflinks exon 57416992 57417271 . - . gene\_id "XLOC\_033857"; transcript\_id "TCONS\_00056483";  
exon\_number "2"; oId "CUFF.59379.1"; tss\_id "TSS42694";  
chr20 Cufflinks exon 57417488 57417600 . - . gene\_id "XLOC\_033857"; transcript\_id "TCONS\_00056483";  
exon\_number "3"; oId "CUFF.59379.1"; tss\_id "TSS42694";  
chr20 Cufflinks exon 57425585 57425962 . - . gene\_id "XLOC\_033857"; transcript\_id "TCONS\_00056483";  
exon\_number "4"; oId "CUFF.59379.1"; tss\_id "TSS42694";  
chr20 Cufflinks exon 57592431 57595321 . - . gene\_id "XLOC\_033869"; transcript\_id "TCONS\_00056497";  
exon\_number "1"; oId "CUFF.59399.1"; tss\_id "TSS42706";  
chr20 Cufflinks exon 57597023 57597036 . - . gene\_id "XLOC\_033869"; transcript\_id "TCONS\_00056497";  
exon\_number "2"; oId "CUFF.59399.1"; tss\_id "TSS42706";  
chr20 Cufflinks exon 57592431 57601332 . - . gene\_id "XLOC\_033869"; transcript\_id "TCONS\_00056498";  
exon\_number "1"; oId "CUFF.59399.2"; tss\_id "TSS42707";  
chr20 Cufflinks exon 57601468 57603410 . - . gene\_id "XLOC\_033869"; transcript\_id "TCONS\_00056498";  
exon\_number "2"; oId "CUFF.59399.2"; tss\_id "TSS42707";  
chr20 Cufflinks exon 58414531 58417653 . - . gene\_id "XLOC\_033872"; transcript\_id "TCONS\_00056501";  
exon\_number "1"; oId "CUFF.59417.1"; tss\_id "TSS42710";  
chr20 Cufflinks exon 58422344 58424317 . - . gene\_id "XLOC\_033872"; transcript\_id "TCONS\_00056501";  
exon\_number "2"; oId "CUFF.59417.1"; tss\_id "TSS42710";  
chr20 Cufflinks exon 58749920 58751007 . - . gene\_id "XLOC\_033881"; transcript\_id "TCONS\_00056515";  
exon\_number "1"; oId "CUFF.59464.1"; tss\_id "TSS42721";  
chr20 Cufflinks exon 58784141 58790329 . - . gene\_id "XLOC\_033881"; transcript\_id "TCONS\_00056515";  
exon\_number "2"; oId "CUFF.59464.1"; tss\_id "TSS42721";  
chr20 Cufflinks exon 59804151 59804437 . - . gene\_id "XLOC\_033886"; transcript\_id "TCONS\_00056521";  
exon\_number "1"; oId "CUFF.59597.1"; tss\_id "TSS42726";  
chr20 Cufflinks exon 59805237 59805287 . - . gene\_id "XLOC\_033886"; transcript\_id "TCONS\_00056521";  
exon\_number "2"; oId "CUFF.59597.1"; tss\_id "TSS42726";  
chr20 Cufflinks exon 59804151 59804437 . - . gene\_id "XLOC\_033886"; transcript\_id "TCONS\_00056522";  
exon\_number "1"; oId "CUFF.59597.2"; tss\_id "TSS42727";  
chr20 Cufflinks exon 59807240 59807346 . - . gene\_id "XLOC\_033886"; transcript\_id "TCONS\_00056522";  
exon\_number "2"; oId "CUFF.59597.2"; tss\_id "TSS42727";  
chr20 Cufflinks exon 59808346 59808568 . - . gene\_id "XLOC\_033886"; transcript\_id "TCONS\_00056522";  
exon\_number "3"; oId "CUFF.59597.2"; tss\_id "TSS42727";  
chr20 Cufflinks exon 61191386 61191751 . - . gene\_id "XLOC\_033918"; transcript\_id "TCONS\_00056569";  
exon\_number "1"; oId "CUFF.59677.1"; tss\_id "TSS42765";  
chr20 Cufflinks exon 61192087 61194425 . - . gene\_id "XLOC\_033918"; transcript\_id "TCONS\_00056569";  
exon\_number "2"; oId "CUFF.59677.1"; tss\_id "TSS42765";  
chr20 Cufflinks exon 61200185 61201219 . - . gene\_id "XLOC\_033918"; transcript\_id "TCONS\_00056569";  
exon\_number "3"; oId "CUFF.59677.1"; tss\_id "TSS42765";  
chr20 Cufflinks exon 61191386 61194425 . - . gene\_id "XLOC\_033918"; transcript\_id "TCONS\_00056570";  
exon\_number "1"; oId "CUFF.59677.2"; tss\_id "TSS42766";

chr20 Cufflinks exon 61200185 61202598 . - . gene\_id "XLOC\_033918"; transcript\_id "TCONS\_00056570";  
 exon\_number "2"; oId "CUFF.59677.2"; tss\_id "TSS42766";

chr20 Cufflinks exon 61191386 61191751 . - . gene\_id "XLOC\_033918"; transcript\_id "TCONS\_00056571";  
 exon\_number "1"; oId "CUFF.59677.3"; tss\_id "TSS42767";

chr20 Cufflinks exon 61192087 61194425 . - . gene\_id "XLOC\_033918"; transcript\_id "TCONS\_00056571";  
 exon\_number "2"; oId "CUFF.59677.3"; tss\_id "TSS42767";

chr20 Cufflinks exon 61202806 61202925 . - . gene\_id "XLOC\_033918"; transcript\_id "TCONS\_00056571";  
 exon\_number "3"; oId "CUFF.59677.3"; tss\_id "TSS42767";

chr20 Cufflinks exon 61198613 61199909 . - . gene\_id "XLOC\_033918"; transcript\_id "TCONS\_00056573";  
 exon\_number "1"; oId "CUFF.59677.4"; tss\_id "TSS42766";

chr20 Cufflinks exon 61200185 61202598 . - . gene\_id "XLOC\_033918"; transcript\_id "TCONS\_00056573";  
 exon\_number "2"; oId "CUFF.59677.4"; tss\_id "TSS42766";

chr20 Cufflinks exon 61361299 61364534 . - . gene\_id "XLOC\_033922"; transcript\_id "TCONS\_00056578";  
 exon\_number "1"; oId "CUFF.59704.4"; tss\_id "TSS42771";

chr20 Cufflinks exon 61369253 61371561 . - . gene\_id "XLOC\_033922"; transcript\_id "TCONS\_00056578";  
 exon\_number "2"; oId "CUFF.59704.4"; tss\_id "TSS42771";

chr20 Cufflinks exon61404152 61405921 . - . gene\_id "XLOC\_033922"; transcript\_id "TCONS\_00056578"; exon\_number  
 "3"; oId "CUFF.59704.4"; tss\_id "TSS42771";

chr20 Cufflinks exon61406667 61408298 . - . gene\_id "XLOC\_033922"; transcript\_id "TCONS\_00056578"; exon\_number  
 "4"; oId "CUFF.59704.4"; tss\_id "TSS42771";

chr20 Cufflinks exon61399034 61405921 . - . gene\_id "XLOC\_033922"; transcript\_id "TCONS\_00056583"; exon\_number  
 "1"; oId "CUFF.59704.8"; tss\_id "TSS42771";

chr20 Cufflinks exon61406667 61406831 . - . gene\_id "XLOC\_033922"; transcript\_id "TCONS\_00056583"; exon\_number  
 "2"; oId "CUFF.59704.8"; tss\_id "TSS42771";

chr20 Cufflinks exon61407664 61408151 . - . gene\_id "XLOC\_033922"; transcript\_id "TCONS\_00056583"; exon\_number  
 "3"; oId "CUFF.59704.8"; tss\_id "TSS42771";

chr20 Cufflinks exon61399034 61405921 . - . gene\_id "XLOC\_033922"; transcript\_id "TCONS\_00056584"; exon\_number  
 "1"; oId "CUFF.59704.10"; tss\_id "TSS42771";

chr20 Cufflinks exon61406667 61406738 . - . gene\_id "XLOC\_033922"; transcript\_id "TCONS\_00056584"; exon\_number  
 "2"; oId "CUFF.59704.10"; tss\_id "TSS42771";

chr20 Cufflinks exon61408158 61408208 . - . gene\_id "XLOC\_033922"; transcript\_id "TCONS\_00056584"; exon\_number  
 "3"; oId "CUFF.59704.10"; tss\_id "TSS42771";

chr20 Cufflinks exon61399034 61405921 . - . gene\_id "XLOC\_033922"; transcript\_id "TCONS\_00056585"; exon\_number  
 "1"; oId "CUFF.59704.7"; tss\_id "TSS42771";

chr20 Cufflinks exon61406667 61408286 . - . gene\_id "XLOC\_033922"; transcript\_id "TCONS\_00056585"; exon\_number  
 "2"; oId "CUFF.59704.7"; tss\_id "TSS42771";

chr20 Cufflinks exon61399034 61405921 . - . gene\_id "XLOC\_033922"; transcript\_id "TCONS\_00056586"; exon\_number  
 "1"; oId "CUFF.59704.9"; tss\_id "TSS42771";

chr20 Cufflinks exon61408158 61408293 . - . gene\_id "XLOC\_033922"; transcript\_id "TCONS\_00056586"; exon\_number  
 "2"; oId "CUFF.59704.9"; tss\_id "TSS42771";

chr20 Cufflinks exon61399034 61405921 . - . gene\_id "XLOC\_033922"; transcript\_id "TCONS\_00056587"; exon\_number  
 "1"; oId "CUFF.59704.6"; tss\_id "TSS42771";

chr20 Cufflinks exon61406667 61406872 . - . gene\_id "XLOC\_033922"; transcript\_id "TCONS\_00056587"; exon\_number

|                                             |   |   |   |                                                                    |  |
|---------------------------------------------|---|---|---|--------------------------------------------------------------------|--|
| "2"; oId "CUFF.59704.6"; tss_id "TSS42771"; |   |   |   |                                                                    |  |
| chr20 Cufflinks exon61408158 61408298       | . | - | . | gene_id "XLOC_033922"; transcript_id "TCONS_00056587"; exon_number |  |
| "3"; oId "CUFF.59704.6"; tss_id "TSS42771"; |   |   |   |                                                                    |  |
| chr20 Cufflinks exon61604953 61607861       | . | - | . | gene_id "XLOC_033936"; transcript_id "TCONS_00056608"; exon_number |  |
| "1"; oId "CUFF.59730.3"; tss_id "TSS42787"; |   |   |   |                                                                    |  |
| chr20 Cufflinks exon61608771 61609683       | . | - | . | gene_id "XLOC_033936"; transcript_id "TCONS_00056608"; exon_number |  |
| "2"; oId "CUFF.59730.3"; tss_id "TSS42787"; |   |   |   |                                                                    |  |
| chr20 Cufflinks exon61604953 61605825       | . | - | . | gene_id "XLOC_033936"; transcript_id "TCONS_00056610"; exon_number |  |
| "1"; oId "CUFF.59730.1"; tss_id "TSS42788"; |   |   |   |                                                                    |  |
| chr20 Cufflinks exon61607693 61609534       | . | - | . | gene_id "XLOC_033936"; transcript_id "TCONS_00056610"; exon_number |  |
| "2"; oId "CUFF.59730.1"; tss_id "TSS42788"; |   |   |   |                                                                    |  |
| chr20 Cufflinks exon61609977 61610076       | . | - | . | gene_id "XLOC_033936"; transcript_id "TCONS_00056610"; exon_number |  |
| "3"; oId "CUFF.59730.1"; tss_id "TSS42788"; |   |   |   |                                                                    |  |
| chr20 Cufflinks exon61794066 61798502       | . | - | . | gene_id "XLOC_033944"; transcript_id "TCONS_00056620"; exon_number |  |
| "1"; oId "CUFF.59756.1"; tss_id "TSS42798"; |   |   |   |                                                                    |  |
| chr20 Cufflinks exon61801122 61801238       | . | - | . | gene_id "XLOC_033944"; transcript_id "TCONS_00056620"; exon_number |  |
| "2"; oId "CUFF.59756.1"; tss_id "TSS42798"; |   |   |   |                                                                    |  |
| chr20 Cufflinks exon61794066 61798502       | . | - | . | gene_id "XLOC_033944"; transcript_id "TCONS_00056621"; exon_number |  |
| "1"; oId "CUFF.59756.2"; tss_id "TSS42799"; |   |   |   |                                                                    |  |
| chr20 Cufflinks exon61805193 61805464       | . | - | . | gene_id "XLOC_033944"; transcript_id "TCONS_00056621"; exon_number |  |
| "2"; oId "CUFF.59756.2"; tss_id "TSS42799"; |   |   |   |                                                                    |  |
| chr20 Cufflinks exon62148153 62149098       | . | - | . | gene_id "XLOC_033959"; transcript_id "TCONS_00056647"; exon_number |  |
| "1"; oId "CUFF.59784.2"; tss_id "TSS42818"; |   |   |   |                                                                    |  |
| chr20 Cufflinks exon62149825 62150475       | . | - | . | gene_id "XLOC_033959"; transcript_id "TCONS_00056647"; exon_number |  |
| "2"; oId "CUFF.59784.2"; tss_id "TSS42818"; |   |   |   |                                                                    |  |
| chr20 Cufflinks exon62148153 62149238       | . | - | . | gene_id "XLOC_033959"; transcript_id "TCONS_00056648"; exon_number |  |
| "1"; oId "CUFF.59784.1"; tss_id "TSS42818"; |   |   |   |                                                                    |  |
| chr20 Cufflinks exon62149825 62150503       | . | - | . | gene_id "XLOC_033959"; transcript_id "TCONS_00056648"; exon_number |  |
| "2"; oId "CUFF.59784.1"; tss_id "TSS42818"; |   |   |   |                                                                    |  |
| chr20 Cufflinks exon62242534 62242542       | . | - | . | gene_id "XLOC_033965"; transcript_id "TCONS_00056661"; exon_number |  |
| "1"; oId "CUFF.59798.1"; tss_id "TSS42827"; |   |   |   |                                                                    |  |
| chr20 Cufflinks exon62493581 62497197       | . | - | . | gene_id "XLOC_033965"; transcript_id "TCONS_00056661"; exon_number |  |
| "2"; oId "CUFF.59798.1"; tss_id "TSS42827"; |   |   |   |                                                                    |  |
| chr20 Cufflinks exon62492609 62494304       | . | - | . | gene_id "XLOC_033965"; transcript_id "TCONS_00056670"; exon_number |  |
| "1"; oId "CUFF.59798.3"; tss_id "TSS42828"; |   |   |   |                                                                    |  |
| chr20 Cufflinks exon62495431 62495656       | . | - | . | gene_id "XLOC_033965"; transcript_id "TCONS_00056670"; exon_number |  |
| "2"; oId "CUFF.59798.3"; tss_id "TSS42828"; |   |   |   |                                                                    |  |
| chr20 Cufflinks exon62496177 62496386       | . | - | . | gene_id "XLOC_033965"; transcript_id "TCONS_00056670"; exon_number |  |
| "3"; oId "CUFF.59798.3"; tss_id "TSS42828"; |   |   |   |                                                                    |  |
| chr20 Cufflinks exon62492609 62494304       | . | - | . | gene_id "XLOC_033965"; transcript_id "TCONS_00056671"; exon_number |  |
| "1"; oId "CUFF.59798.2"; tss_id "TSS42828"; |   |   |   |                                                                    |  |
| chr20 Cufflinks exon62495431 62495589       | . | - | . | gene_id "XLOC_033965"; transcript_id "TCONS_00056671"; exon_number |  |
| "2"; oId "CUFF.59798.2"; tss_id "TSS42828"; |   |   |   |                                                                    |  |



|       |                        |          |   |   |   |                                                                                                                |
|-------|------------------------|----------|---|---|---|----------------------------------------------------------------------------------------------------------------|
| chr20 | Cufflinks exon62496394 | 62496412 | . | - | . | gene_id "XLOC_033965"; transcript_id "TCONS_00056671"; exon_number "3"; oId "CUFF.59798.2"; tss_id "TSS42828"; |
| chr20 | Cufflinks exon62481960 | 62488983 | . | - | . | gene_id "XLOC_033970"; transcript_id "TCONS_00056668"; exon_number "1"; oId "CUFF.59819.1"; tss_id "TSS42834"; |
| chr20 | Cufflinks exon62599885 | 62599991 | . | - | . | gene_id "XLOC_033970"; transcript_id "TCONS_00056668"; exon_number "2"; oId "CUFF.59819.1"; tss_id "TSS42834"; |
| chr21 | Cufflinks exon9847331  | 9847651  | . | + | . | gene_id "XLOC_033987"; transcript_id "TCONS_00056693"; exon_number "1"; oId "CUFF.59894.1"; tss_id "TSS42856"; |
| chr21 | Cufflinks exon9848044  | 9848106  | . | + | . | gene_id "XLOC_033987"; transcript_id "TCONS_00056693"; exon_number "2"; oId "CUFF.59894.1"; tss_id "TSS42856"; |
| chr21 | Cufflinks exon9857445  | 9858475  | . | + | . | gene_id "XLOC_033987"; transcript_id "TCONS_00056693"; exon_number "3"; oId "CUFF.59894.1"; tss_id "TSS42856"; |
| chr21 | Cufflinks exon17442842 | 17442868 | . | + | . | gene_id "XLOC_034023"; transcript_id "TCONS_00056745"; exon_number "1"; oId "CUFF.60078.1"; tss_id "TSS42896"; |
| chr21 | Cufflinks exon17443434 | 17443718 | . | + | . | gene_id "XLOC_034023"; transcript_id "TCONS_00056745"; exon_number "2"; oId "CUFF.60078.1"; tss_id "TSS42896"; |
| chr21 | Cufflinks exon17553911 | 17554007 | . | + | . | gene_id "XLOC_034023"; transcript_id "TCONS_00056745"; exon_number "3"; oId "CUFF.60078.1"; tss_id "TSS42896"; |
| chr21 | Cufflinks exon17603376 | 17603435 | . | + | . | gene_id "XLOC_034023"; transcript_id "TCONS_00056745"; exon_number "4"; oId "CUFF.60078.1"; tss_id "TSS42896"; |
| chr21 | Cufflinks exon17763934 | 17764006 | . | + | . | gene_id "XLOC_034023"; transcript_id "TCONS_00056745"; exon_number "5"; oId "CUFF.60078.1"; tss_id "TSS42896"; |
| chr21 | Cufflinks exon17859811 | 17859858 | . | + | . | gene_id "XLOC_034023"; transcript_id "TCONS_00056745"; exon_number "6"; oId "CUFF.60078.1"; tss_id "TSS42896"; |
| chr21 | Cufflinks exon17909699 | 17909759 | . | + | . | gene_id "XLOC_034023"; transcript_id "TCONS_00056745"; exon_number "7"; oId "CUFF.60078.1"; tss_id "TSS42896"; |
| chr21 | Cufflinks exon17966660 | 17966774 | . | + | . | gene_id "XLOC_034023"; transcript_id "TCONS_00056745"; exon_number "8"; oId "CUFF.60078.1"; tss_id "TSS42896"; |
| chr21 | Cufflinks exon17979314 | 17982935 | . | + | . | gene_id "XLOC_034023"; transcript_id "TCONS_00056745"; exon_number "9"; oId "CUFF.60078.1"; tss_id "TSS42896"; |
| chr21 | Cufflinks exon17443434 | 17443718 | . | + | . | gene_id "XLOC_034023"; transcript_id "TCONS_00056746"; exon_number "1"; oId "CUFF.60078.2"; tss_id "TSS42897"; |
| chr21 | Cufflinks exon17553911 | 17554007 | . | + | . | gene_id "XLOC_034023"; transcript_id "TCONS_00056746"; exon_number "2"; oId "CUFF.60078.2"; tss_id "TSS42897"; |
| chr21 | Cufflinks exon17603376 | 17603435 | . | + | . | gene_id "XLOC_034023"; transcript_id "TCONS_00056746"; exon_number "3"; oId "CUFF.60078.2"; tss_id "TSS42897"; |
| chr21 | Cufflinks exon17763934 | 17764005 | . | + | . | gene_id "XLOC_034023"; transcript_id "TCONS_00056746"; exon_number "4"; oId "CUFF.60078.2"; tss_id "TSS42897"; |
| chr21 | Cufflinks exon17859810 | 17859858 | . | + | . | gene_id "XLOC_034023"; transcript_id "TCONS_00056746"; exon_number "5"; oId "CUFF.60078.2"; tss_id "TSS42897"; |
| chr21 | Cufflinks exon17979314 | 17982935 | . | + | . | gene_id "XLOC_034023"; transcript_id "TCONS_00056746"; exon_number "6"; oId "CUFF.60078.2"; tss_id "TSS42897"; |
| chr21 | Cufflinks exon17566699 | 17566953 | . | + | . | gene_id "XLOC_034023"; transcript_id "TCONS_00056748"; exon_number "1"; oId "CUFF.60078.2"; tss_id "TSS42897"; |

|                                             |   |   |   |                                                                    |  |
|---------------------------------------------|---|---|---|--------------------------------------------------------------------|--|
| "1"; oId "CUFF.60078.5"; tss_id "TSS42898"; |   |   |   |                                                                    |  |
| chr21 Cufflinks exon17603376 17603435       | . | + | . | gene_id "XLOC_034023"; transcript_id "TCONS_00056748"; exon_number |  |
| "2"; oId "CUFF.60078.5"; tss_id "TSS42898"; |   |   |   |                                                                    |  |
| chr21 Cufflinks exon17763934 17764005       | . | + | . | gene_id "XLOC_034023"; transcript_id "TCONS_00056748"; exon_number |  |
| "3"; oId "CUFF.60078.5"; tss_id "TSS42898"; |   |   |   |                                                                    |  |
| chr21 Cufflinks exon17859810 17859858       | . | + | . | gene_id "XLOC_034023"; transcript_id "TCONS_00056748"; exon_number |  |
| "4"; oId "CUFF.60078.5"; tss_id "TSS42898"; |   |   |   |                                                                    |  |
| chr21 Cufflinks exon17909699 17909759       | . | + | . | gene_id "XLOC_034023"; transcript_id "TCONS_00056748"; exon_number |  |
| "5"; oId "CUFF.60078.5"; tss_id "TSS42898"; |   |   |   |                                                                    |  |
| chr21 Cufflinks exon17966660 17966774       | . | + | . | gene_id "XLOC_034023"; transcript_id "TCONS_00056748"; exon_number |  |
| "6"; oId "CUFF.60078.5"; tss_id "TSS42898"; |   |   |   |                                                                    |  |
| chr21 Cufflinks exon17979314 17982935       | . | + | . | gene_id "XLOC_034023"; transcript_id "TCONS_00056748"; exon_number |  |
| "7"; oId "CUFF.60078.5"; tss_id "TSS42898"; |   |   |   |                                                                    |  |
| chr21 Cufflinks exon17566699 17566953       | . | + | . | gene_id "XLOC_034023"; transcript_id "TCONS_00056747"; exon_number |  |
| "1"; oId "CUFF.60078.4"; tss_id "TSS42898"; |   |   |   |                                                                    |  |
| chr21 Cufflinks exon17603376 17603435       | . | + | . | gene_id "XLOC_034023"; transcript_id "TCONS_00056747"; exon_number |  |
| "2"; oId "CUFF.60078.4"; tss_id "TSS42898"; |   |   |   |                                                                    |  |
| chr21 Cufflinks exon17763934 17764005       | . | + | . | gene_id "XLOC_034023"; transcript_id "TCONS_00056747"; exon_number |  |
| "3"; oId "CUFF.60078.4"; tss_id "TSS42898"; |   |   |   |                                                                    |  |
| chr21 Cufflinks exon17859810 17859858       | . | + | . | gene_id "XLOC_034023"; transcript_id "TCONS_00056747"; exon_number |  |
| "4"; oId "CUFF.60078.4"; tss_id "TSS42898"; |   |   |   |                                                                    |  |
| chr21 Cufflinks exon17909699 17909759       | . | + | . | gene_id "XLOC_034023"; transcript_id "TCONS_00056747"; exon_number |  |
| "5"; oId "CUFF.60078.4"; tss_id "TSS42898"; |   |   |   |                                                                    |  |
| chr21 Cufflinks exon17979314 17982935       | . | + | . | gene_id "XLOC_034023"; transcript_id "TCONS_00056747"; exon_number |  |
| "6"; oId "CUFF.60078.4"; tss_id "TSS42898"; |   |   |   |                                                                    |  |
| chr21 Cufflinks exon17566699 17566953       | . | + | . | gene_id "XLOC_034023"; transcript_id "TCONS_00056749"; exon_number |  |
| "1"; oId "CUFF.60078.3"; tss_id "TSS42898"; |   |   |   |                                                                    |  |
| chr21 Cufflinks exon17603376 17603435       | . | + | . | gene_id "XLOC_034023"; transcript_id "TCONS_00056749"; exon_number |  |
| "2"; oId "CUFF.60078.3"; tss_id "TSS42898"; |   |   |   |                                                                    |  |
| chr21 Cufflinks exon17763934 17764005       | . | + | . | gene_id "XLOC_034023"; transcript_id "TCONS_00056749"; exon_number |  |
| "3"; oId "CUFF.60078.3"; tss_id "TSS42898"; |   |   |   |                                                                    |  |
| chr21 Cufflinks exon17859810 17859858       | . | + | . | gene_id "XLOC_034023"; transcript_id "TCONS_00056749"; exon_number |  |
| "4"; oId "CUFF.60078.3"; tss_id "TSS42898"; |   |   |   |                                                                    |  |
| chr21 Cufflinks exon17909699 17909759       | . | + | . | gene_id "XLOC_034023"; transcript_id "TCONS_00056749"; exon_number |  |
| "5"; oId "CUFF.60078.3"; tss_id "TSS42898"; |   |   |   |                                                                    |  |
| chr21 Cufflinks exon17979314 17979407       | . | + | . | gene_id "XLOC_034023"; transcript_id "TCONS_00056749"; exon_number |  |
| "6"; oId "CUFF.60078.3"; tss_id "TSS42898"; |   |   |   |                                                                    |  |
| chr21 Cufflinks exon17999496 17999562       | . | + | . | gene_id "XLOC_034023"; transcript_id "TCONS_00056749"; exon_number |  |
| "7"; oId "CUFF.60078.3"; tss_id "TSS42898"; |   |   |   |                                                                    |  |
| chr21 Cufflinks exon17586584 17586698       | . | + | . | gene_id "XLOC_034023"; transcript_id "TCONS_00056750"; exon_number |  |
| "1"; oId "CUFF.60078.6"; tss_id "TSS42899"; |   |   |   |                                                                    |  |
| chr21 Cufflinks exon17603376 17603435       | . | + | . | gene_id "XLOC_034023"; transcript_id "TCONS_00056750"; exon_number |  |
| "2"; oId "CUFF.60078.6"; tss_id "TSS42899"; |   |   |   |                                                                    |  |

|       |                        |          |   |   |   |                                                                                                                |
|-------|------------------------|----------|---|---|---|----------------------------------------------------------------------------------------------------------------|
| chr21 | Cufflinks exon17763934 | 17764005 | . | + | . | gene_id "XLOC_034023"; transcript_id "TCONS_00056750"; exon_number "3"; oId "CUFF.60078.6"; tss_id "TSS42899"; |
| chr21 | Cufflinks exon17859810 | 17859859 | . | + | . | gene_id "XLOC_034023"; transcript_id "TCONS_00056750"; exon_number "4"; oId "CUFF.60078.6"; tss_id "TSS42899"; |
| chr21 | Cufflinks exon17909700 | 17909759 | . | + | . | gene_id "XLOC_034023"; transcript_id "TCONS_00056750"; exon_number "5"; oId "CUFF.60078.6"; tss_id "TSS42899"; |
| chr21 | Cufflinks exon17961673 | 17961730 | . | + | . | gene_id "XLOC_034023"; transcript_id "TCONS_00056750"; exon_number "6"; oId "CUFF.60078.6"; tss_id "TSS42899"; |
| chr21 | Cufflinks exon20037081 | 20037111 | . | + | . | gene_id "XLOC_034037"; transcript_id "TCONS_00056767"; exon_number "1"; oId "CUFF.60123.1"; tss_id "TSS42913"; |
| chr21 | Cufflinks exon20230541 | 20230833 | . | + | . | gene_id "XLOC_034037"; transcript_id "TCONS_00056767"; exon_number "2"; oId "CUFF.60123.1"; tss_id "TSS42913"; |
| chr21 | Cufflinks exon26934072 | 26934326 | . | + | . | gene_id "XLOC_034048"; transcript_id "TCONS_00056780"; exon_number "1"; oId "CUFF.60178.1"; tss_id "TSS42926"; |
| chr21 | Cufflinks exon26934437 | 26936570 | . | + | . | gene_id "XLOC_034048"; transcript_id "TCONS_00056780"; exon_number "2"; oId "CUFF.60178.1"; tss_id "TSS42926"; |
| chr21 | Cufflinks exon26934187 | 26934326 | . | + | . | gene_id "XLOC_034048"; transcript_id "TCONS_00056781"; exon_number "1"; oId "CUFF.60178.2"; tss_id "TSS42927"; |
| chr21 | Cufflinks exon26934437 | 26934569 | . | + | . | gene_id "XLOC_034048"; transcript_id "TCONS_00056781"; exon_number "2"; oId "CUFF.60178.2"; tss_id "TSS42927"; |
| chr21 | Cufflinks exon26942149 | 26942233 | . | + | . | gene_id "XLOC_034048"; transcript_id "TCONS_00056781"; exon_number "3"; oId "CUFF.60178.2"; tss_id "TSS42927"; |
| chr21 | Cufflinks exon26946205 | 26947480 | . | + | . | gene_id "XLOC_034048"; transcript_id "TCONS_00056781"; exon_number "4"; oId "CUFF.60178.2"; tss_id "TSS42927"; |
| chr21 | Cufflinks exon30744821 | 30744883 | . | + | . | gene_id "XLOC_034064"; transcript_id "TCONS_00056814"; exon_number "1"; oId "CUFF.60260.1"; tss_id "TSS42949"; |
| chr21 | Cufflinks exon30745562 | 30746300 | . | + | . | gene_id "XLOC_034064"; transcript_id "TCONS_00056814"; exon_number "2"; oId "CUFF.60260.1"; tss_id "TSS42949"; |
| chr21 | Cufflinks exon35552906 | 35553094 | . | + | . | gene_id "XLOC_034181"; transcript_id "TCONS_00056970"; exon_number "1"; oId "CUFF.60593.1"; tss_id "TSS43074"; |
| chr21 | Cufflinks exon35563478 | 35563653 | . | + | . | gene_id "XLOC_034181"; transcript_id "TCONS_00056970"; exon_number "2"; oId "CUFF.60593.1"; tss_id "TSS43074"; |
| chr21 | Cufflinks exon35552978 | 35553094 | . | + | . | gene_id "XLOC_034181"; transcript_id "TCONS_00056971"; exon_number "1"; oId "CUFF.60593.2"; tss_id "TSS43074"; |
| chr21 | Cufflinks exon35555009 | 35555546 | . | + | . | gene_id "XLOC_034181"; transcript_id "TCONS_00056971"; exon_number "2"; oId "CUFF.60593.2"; tss_id "TSS43074"; |
| chr21 | Cufflinks exon35635229 | 35636936 | . | + | . | gene_id "XLOC_034189"; transcript_id "TCONS_00056980"; exon_number "1"; oId "CUFF.60602.2"; tss_id "TSS43082"; |
| chr21 | Cufflinks exon35639280 | 35639399 | . | + | . | gene_id "XLOC_034189"; transcript_id "TCONS_00056980"; exon_number "2"; oId "CUFF.60602.2"; tss_id "TSS43082"; |
| chr21 | Cufflinks exon35639566 | 35641198 | . | + | . | gene_id "XLOC_034189"; transcript_id "TCONS_00056980"; exon_number "3"; oId "CUFF.60602.2"; tss_id "TSS43082"; |
| chr21 | Cufflinks exon35635232 | 35636497 | . | + | . | gene_id "XLOC_034189"; transcript_id "TCONS_00056981"; exon_number                                             |

|                                                                                      |   |   |   |                                                                    |
|--------------------------------------------------------------------------------------|---|---|---|--------------------------------------------------------------------|
| "1"; oId "CUFF.60602.3"; tss_id "TSS43082";<br>chr21 Cufflinks exon35636728 35641198 | . | + | . | gene_id "XLOC_034189"; transcript_id "TCONS_00056981"; exon_number |
| "2"; oId "CUFF.60602.3"; tss_id "TSS43082";<br>chr21 Cufflinks exon37377446 37378163 | . | + | . | gene_id "XLOC_034207"; transcript_id "TCONS_00057003"; exon_number |
| "1"; oId "CUFF.60651.2"; tss_id "TSS43100";<br>chr21 Cufflinks exon37380018 37380593 | . | + | . | gene_id "XLOC_034207"; transcript_id "TCONS_00057003"; exon_number |
| "2"; oId "CUFF.60651.2"; tss_id "TSS43100";<br>chr21 Cufflinks exon37377527 37378163 | . | + | . | gene_id "XLOC_034207"; transcript_id "TCONS_00057004"; exon_number |
| "1"; oId "CUFF.60651.3"; tss_id "TSS43100";<br>chr21 Cufflinks exon37379617 37380132 | . | + | . | gene_id "XLOC_034207"; transcript_id "TCONS_00057004"; exon_number |
| "2"; oId "CUFF.60651.3"; tss_id "TSS43100";<br>chr21 Cufflinks exon37387008 37387553 | . | + | . | gene_id "XLOC_034207"; transcript_id "TCONS_00057004"; exon_number |
| "3"; oId "CUFF.60651.3"; tss_id "TSS43100";<br>chr21 Cufflinks exon37377618 37378163 | . | + | . | gene_id "XLOC_034207"; transcript_id "TCONS_00057005"; exon_number |
| "1"; oId "CUFF.60651.4"; tss_id "TSS43101";<br>chr21 Cufflinks exon37379617 37380593 | . | + | . | gene_id "XLOC_034207"; transcript_id "TCONS_00057005"; exon_number |
| "2"; oId "CUFF.60651.4"; tss_id "TSS43101";<br>chr21 Cufflinks exon37802399 37802710 | . | + | . | gene_id "XLOC_034218"; transcript_id "TCONS_00057018"; exon_number |
| "1"; oId "CUFF.60689.1"; tss_id "TSS43113";<br>chr21 Cufflinks exon37817926 37818305 | . | + | . | gene_id "XLOC_034218"; transcript_id "TCONS_00057018"; exon_number |
| "2"; oId "CUFF.60689.1"; tss_id "TSS43113";<br>chr21 Cufflinks exon37852529 37854445 | . | + | . | gene_id "XLOC_034218"; transcript_id "TCONS_00057018"; exon_number |
| "3"; oId "CUFF.60689.1"; tss_id "TSS43113";<br>chr21 Cufflinks exon37802635 37802710 | . | + | . | gene_id "XLOC_034218"; transcript_id "TCONS_00057019"; exon_number |
| "1"; oId "CUFF.60689.3"; tss_id "TSS43114";<br>chr21 Cufflinks exon37817926 37818305 | . | + | . | gene_id "XLOC_034218"; transcript_id "TCONS_00057019"; exon_number |
| "2"; oId "CUFF.60689.3"; tss_id "TSS43114";<br>chr21 Cufflinks exon37832588 37832993 | . | + | . | gene_id "XLOC_034218"; transcript_id "TCONS_00057019"; exon_number |
| "3"; oId "CUFF.60689.3"; tss_id "TSS43114";<br>chr21 Cufflinks exon38580804 38580845 | . | + | . | gene_id "XLOC_034238"; transcript_id "TCONS_00057044"; exon_number |
| "1"; oId "CUFF.60723.1"; tss_id "TSS43136";<br>chr21 Cufflinks exon38580955 38581057 | . | + | . | gene_id "XLOC_034238"; transcript_id "TCONS_00057044"; exon_number |
| "2"; oId "CUFF.60723.1"; tss_id "TSS43136";<br>chr21 Cufflinks exon38592539 38594037 | . | + | . | gene_id "XLOC_034238"; transcript_id "TCONS_00057044"; exon_number |
| "3"; oId "CUFF.60723.1"; tss_id "TSS43136";<br>chr21 Cufflinks exon38888449 38888974 | . | + | . | gene_id "XLOC_034244"; transcript_id "TCONS_00057056"; exon_number |
| "1"; oId "CUFF.60742.2"; tss_id "TSS43147";<br>chr21 Cufflinks exon38889333 38889432 | . | + | . | gene_id "XLOC_034244"; transcript_id "TCONS_00057056"; exon_number |
| "2"; oId "CUFF.60742.2"; tss_id "TSS43147";<br>chr21 Cufflinks exon38890216 38892000 | . | + | . | gene_id "XLOC_034244"; transcript_id "TCONS_00057056"; exon_number |
| "3"; oId "CUFF.60742.2"; tss_id "TSS43147";<br>chr21 Cufflinks exon38889014 38889432 | . | + | . | gene_id "XLOC_034244"; transcript_id "TCONS_00057057"; exon_number |
| "1"; oId "CUFF.60742.3"; tss_id "TSS43148";                                          | . | + | . |                                                                    |

|       |                        |          |   |   |   |                                                                                                                |
|-------|------------------------|----------|---|---|---|----------------------------------------------------------------------------------------------------------------|
| chr21 | Cufflinks exon38890216 | 38892000 | . | + | . | gene_id "XLOC_034244"; transcript_id "TCONS_00057057"; exon_number "2"; oId "CUFF.60742.3"; tss_id "TSS43148"; |
| chr21 | Cufflinks exon40687542 | 40689135 | . | + | . | gene_id "XLOC_034257"; transcript_id "TCONS_00057074"; exon_number "1"; oId "CUFF.60849.1"; tss_id "TSS43163"; |
| chr21 | Cufflinks exon40708704 | 40708878 | . | + | . | gene_id "XLOC_034257"; transcript_id "TCONS_00057074"; exon_number "2"; oId "CUFF.60849.1"; tss_id "TSS43163"; |
| chr21 | Cufflinks exon40687572 | 40687741 | . | + | . | gene_id "XLOC_034257"; transcript_id "TCONS_00057075"; exon_number "1"; oId "CUFF.60849.3"; tss_id "TSS43163"; |
| chr21 | Cufflinks exon40688971 | 40689135 | . | + | . | gene_id "XLOC_034257"; transcript_id "TCONS_00057075"; exon_number "2"; oId "CUFF.60849.3"; tss_id "TSS43163"; |
| chr21 | Cufflinks exon40694728 | 40695144 | . | + | . | gene_id "XLOC_034257"; transcript_id "TCONS_00057075"; exon_number "3"; oId "CUFF.60849.3"; tss_id "TSS43163"; |
| chr21 | Cufflinks exon43187592 | 43189543 | . | + | . | gene_id "XLOC_034273"; transcript_id "TCONS_00057114"; exon_number "1"; oId "CUFF.60908.2"; tss_id "TSS43189"; |
| chr21 | Cufflinks exon43194727 | 43200144 | . | + | . | gene_id "XLOC_034273"; transcript_id "TCONS_00057114"; exon_number "2"; oId "CUFF.60908.2"; tss_id "TSS43189"; |
| chr21 | Cufflinks exon43187592 | 43189543 | . | + | . | gene_id "XLOC_034273"; transcript_id "TCONS_00057113"; exon_number "1"; oId "CUFF.60908.1"; tss_id "TSS43189"; |
| chr21 | Cufflinks exon43194276 | 43194355 | . | + | . | gene_id "XLOC_034273"; transcript_id "TCONS_00057113"; exon_number "2"; oId "CUFF.60908.1"; tss_id "TSS43189"; |
| chr21 | Cufflinks exon43194727 | 43200144 | . | + | . | gene_id "XLOC_034273"; transcript_id "TCONS_00057113"; exon_number "3"; oId "CUFF.60908.1"; tss_id "TSS43189"; |
| chr21 | Cufflinks exon43193970 | 43194048 | . | + | . | gene_id "XLOC_034273"; transcript_id "TCONS_00057115"; exon_number "1"; oId "CUFF.60908.3"; tss_id "TSS43190"; |
| chr21 | Cufflinks exon43194282 | 43194355 | . | + | . | gene_id "XLOC_034273"; transcript_id "TCONS_00057115"; exon_number "2"; oId "CUFF.60908.3"; tss_id "TSS43190"; |
| chr21 | Cufflinks exon43194727 | 43200144 | . | + | . | gene_id "XLOC_034273"; transcript_id "TCONS_00057115"; exon_number "3"; oId "CUFF.60908.3"; tss_id "TSS43190"; |
| chr21 | Cufflinks exon43429303 | 43429693 | . | + | . | gene_id "XLOC_034277"; transcript_id "TCONS_00057119"; exon_number "1"; oId "CUFF.60940.2"; tss_id "TSS43194"; |
| chr21 | Cufflinks exon43431330 | 43431694 | . | + | . | gene_id "XLOC_034277"; transcript_id "TCONS_00057119"; exon_number "2"; oId "CUFF.60940.2"; tss_id "TSS43194"; |
| chr21 | Cufflinks exon44529113 | 44529626 | . | + | . | gene_id "XLOC_034311"; transcript_id "TCONS_00057181"; exon_number "1"; oId "CUFF.61047.2"; tss_id "TSS43242"; |
| chr21 | Cufflinks exon44553148 | 44553227 | . | + | . | gene_id "XLOC_034311"; transcript_id "TCONS_00057181"; exon_number "2"; oId "CUFF.61047.2"; tss_id "TSS43242"; |
| chr21 | Cufflinks exon44554501 | 44555243 | . | + | . | gene_id "XLOC_034311"; transcript_id "TCONS_00057181"; exon_number "3"; oId "CUFF.61047.2"; tss_id "TSS43242"; |
| chr21 | Cufflinks exon44564457 | 44564474 | . | + | . | gene_id "XLOC_034311"; transcript_id "TCONS_00057181"; exon_number "4"; oId "CUFF.61047.2"; tss_id "TSS43242"; |
| chr21 | Cufflinks exon44597381 | 44597401 | . | + | . | gene_id "XLOC_034316"; transcript_id "TCONS_00057186"; exon_number "1"; oId "CUFF.61077.1"; tss_id "TSS43247"; |
| chr21 | Cufflinks exon44602718 | 44602773 | . | + | . | gene_id "XLOC_034316"; transcript_id "TCONS_00057186"; exon_number "2"; oId "CUFF.61077.1"; tss_id "TSS43247"; |

"2"; oId "CUFF.61077.1"; tss\_id "TSS43247";  
chr21 Cufflinks exon44602914 44603637 . + . gene\_id "XLOC\_034316"; transcript\_id "TCONS\_00057186"; exon\_number  
"3"; oId "CUFF.61077.1"; tss\_id "TSS43247";  
chr21 Cufflinks exon45578813 45579227 . + . gene\_id "XLOC\_034344"; transcript\_id "TCONS\_00057222"; exon\_number  
"1"; oId "CUFF.61183.2"; tss\_id "TSS43280";  
chr21 Cufflinks exon45583093 45585510 . + . gene\_id "XLOC\_034344"; transcript\_id "TCONS\_00057222"; exon\_number  
"2"; oId "CUFF.61183.2"; tss\_id "TSS43280";  
chr21 Cufflinks exon45585646 45585751 . + . gene\_id "XLOC\_034346"; transcript\_id "TCONS\_00057224"; exon\_number  
"1"; oId "CUFF.61185.1"; tss\_id "TSS43282";  
chr21 Cufflinks exon45585778 45588496 . + . gene\_id "XLOC\_034346"; transcript\_id "TCONS\_00057224"; exon\_number  
"2"; oId "CUFF.61185.1"; tss\_id "TSS43282";  
chr21 Cufflinks exon45625822 45628102 . + . gene\_id "XLOC\_034347"; transcript\_id "TCONS\_00057226"; exon\_number  
"1"; oId "CUFF.61189.2"; tss\_id "TSS43283";  
chr21 Cufflinks exon45628352 45628414 . + . gene\_id "XLOC\_034347"; transcript\_id "TCONS\_00057226"; exon\_number  
"2"; oId "CUFF.61189.2"; tss\_id "TSS43283";  
chr21 Cufflinks exon45628670 45630367 . + . gene\_id "XLOC\_034347"; transcript\_id "TCONS\_00057226"; exon\_number  
"3"; oId "CUFF.61189.2"; tss\_id "TSS43283";  
chr21 Cufflinks exon45625822 45628102 . + . gene\_id "XLOC\_034347"; transcript\_id "TCONS\_00057225"; exon\_number  
"1"; oId "CUFF.61189.1"; tss\_id "TSS43283";  
chr21 Cufflinks exon45628670 45630367 . + . gene\_id "XLOC\_034347"; transcript\_id "TCONS\_00057225"; exon\_number  
"2"; oId "CUFF.61189.1"; tss\_id "TSS43283";  
chr21 Cufflinks exon45662232 45662275 . + . gene\_id "XLOC\_034349"; transcript\_id "TCONS\_00057230"; exon\_number  
"1"; oId "CUFF.61195.3"; tss\_id "TSS43285";  
chr21 Cufflinks exon45664179 45668272 . + . gene\_id "XLOC\_034349"; transcript\_id "TCONS\_00057230"; exon\_number  
"2"; oId "CUFF.61195.3"; tss\_id "TSS43285";  
chr21 Cufflinks exon45902898 45903318 . + . gene\_id "XLOC\_034360"; transcript\_id "TCONS\_00057249"; exon\_number  
"1"; oId "CUFF.61219.1"; tss\_id "TSS43297";  
chr21 Cufflinks exon45904317 45904480 . + . gene\_id "XLOC\_034360"; transcript\_id "TCONS\_00057249"; exon\_number  
"2"; oId "CUFF.61219.1"; tss\_id "TSS43297";  
chr21 Cufflinks exon45905387 45906113 . + . gene\_id "XLOC\_034360"; transcript\_id "TCONS\_00057249"; exon\_number  
"3"; oId "CUFF.61219.1"; tss\_id "TSS43297";  
chr21 Cufflinks exon45916399 45917201 . + . gene\_id "XLOC\_034360"; transcript\_id "TCONS\_00057249"; exon\_number  
"4"; oId "CUFF.61219.1"; tss\_id "TSS43297";  
chr21 Cufflinks exon45917447 45917829 . + . gene\_id "XLOC\_034360"; transcript\_id "TCONS\_00057249"; exon\_number  
"5"; oId "CUFF.61219.1"; tss\_id "TSS43297";  
chr21 Cufflinks exon45918180 45920137 . + . gene\_id "XLOC\_034360"; transcript\_id "TCONS\_00057249"; exon\_number  
"6"; oId "CUFF.61219.1"; tss\_id "TSS43297";  
chr21 Cufflinks exon45922478 45922678 . + . gene\_id "XLOC\_034360"; transcript\_id "TCONS\_00057249"; exon\_number  
"7"; oId "CUFF.61219.1"; tss\_id "TSS43297";  
chr21 Cufflinks exon45926058 45926211 . + . gene\_id "XLOC\_034360"; transcript\_id "TCONS\_00057249"; exon\_number  
"8"; oId "CUFF.61219.1"; tss\_id "TSS43297";  
chr21 Cufflinks exon45926530 45926982 . + . gene\_id "XLOC\_034360"; transcript\_id "TCONS\_00057249"; exon\_number  
"9"; oId "CUFF.61219.1"; tss\_id "TSS43297";

|       |                        |          |   |   |   |                                                                                                                 |
|-------|------------------------|----------|---|---|---|-----------------------------------------------------------------------------------------------------------------|
| chr21 | Cufflinks exon45927920 | 45928192 | . | + | . | gene_id "XLOC_034360"; transcript_id "TCONS_00057249"; exon_number "10"; oId "CUFF.61219.1"; tss_id "TSS43297"; |
| chr21 | Cufflinks exon45928610 | 45929297 | . | + | . | gene_id "XLOC_034360"; transcript_id "TCONS_00057249"; exon_number "11"; oId "CUFF.61219.1"; tss_id "TSS43297"; |
| chr21 | Cufflinks exon45929706 | 45929810 | . | + | . | gene_id "XLOC_034360"; transcript_id "TCONS_00057249"; exon_number "12"; oId "CUFF.61219.1"; tss_id "TSS43297"; |
| chr21 | Cufflinks exon45929885 | 45930683 | . | + | . | gene_id "XLOC_034360"; transcript_id "TCONS_00057249"; exon_number "13"; oId "CUFF.61219.1"; tss_id "TSS43297"; |
| chr21 | Cufflinks exon45930823 | 45930954 | . | + | . | gene_id "XLOC_034360"; transcript_id "TCONS_00057249"; exon_number "14"; oId "CUFF.61219.1"; tss_id "TSS43297"; |
| chr21 | Cufflinks exon45935380 | 45947289 | . | + | . | gene_id "XLOC_034360"; transcript_id "TCONS_00057249"; exon_number "15"; oId "CUFF.61219.1"; tss_id "TSS43297"; |
| chr21 | Cufflinks exon46222156 | 46222551 | . | + | . | gene_id "XLOC_034367"; transcript_id "TCONS_00057261"; exon_number "1"; oId "CUFF.61237.2"; tss_id "TSS43308";  |
| chr21 | Cufflinks exon46223662 | 46224631 | . | + | . | gene_id "XLOC_034367"; transcript_id "TCONS_00057261"; exon_number "2"; oId "CUFF.61237.2"; tss_id "TSS43308";  |
| chr21 | Cufflinks exon46409534 | 46412304 | . | + | . | gene_id "XLOC_034377"; transcript_id "TCONS_00057275"; exon_number "1"; oId "CUFF.61264.2"; tss_id "TSS43318";  |
| chr21 | Cufflinks exon46414650 | 46422002 | . | + | . | gene_id "XLOC_034377"; transcript_id "TCONS_00057275"; exon_number "2"; oId "CUFF.61264.2"; tss_id "TSS43318";  |
| chr21 | Cufflinks exon46707961 | 46708080 | . | + | . | gene_id "XLOC_034380"; transcript_id "TCONS_00057285"; exon_number "1"; oId "CUFF.61278.2"; tss_id "TSS43322";  |
| chr21 | Cufflinks exon46708891 | 46709353 | . | + | . | gene_id "XLOC_034380"; transcript_id "TCONS_00057285"; exon_number "2"; oId "CUFF.61278.2"; tss_id "TSS43322";  |
| chr21 | Cufflinks exon46710386 | 46717269 | . | + | . | gene_id "XLOC_034380"; transcript_id "TCONS_00057285"; exon_number "3"; oId "CUFF.61278.2"; tss_id "TSS43322";  |
| chr21 | Cufflinks exon46707961 | 46708080 | . | + | . | gene_id "XLOC_034380"; transcript_id "TCONS_00057284"; exon_number "1"; oId "CUFF.61278.1"; tss_id "TSS43322";  |
| chr21 | Cufflinks exon46709266 | 46709353 | . | + | . | gene_id "XLOC_034380"; transcript_id "TCONS_00057284"; exon_number "2"; oId "CUFF.61278.1"; tss_id "TSS43322";  |
| chr21 | Cufflinks exon46710386 | 46717269 | . | + | . | gene_id "XLOC_034380"; transcript_id "TCONS_00057284"; exon_number "3"; oId "CUFF.61278.1"; tss_id "TSS43322";  |
| chr21 | Cufflinks exon46707967 | 46708159 | . | + | . | gene_id "XLOC_034380"; transcript_id "TCONS_00057286"; exon_number "1"; oId "CUFF.61278.3"; tss_id "TSS43322";  |
| chr21 | Cufflinks exon46709266 | 46709353 | . | + | . | gene_id "XLOC_034380"; transcript_id "TCONS_00057286"; exon_number "2"; oId "CUFF.61278.3"; tss_id "TSS43322";  |
| chr21 | Cufflinks exon46710386 | 46717269 | . | + | . | gene_id "XLOC_034380"; transcript_id "TCONS_00057286"; exon_number "3"; oId "CUFF.61278.3"; tss_id "TSS43322";  |
| chr21 | Cufflinks exon47013581 | 47013622 | . | + | . | gene_id "XLOC_034390"; transcript_id "TCONS_00057297"; exon_number "1"; oId "CUFF.61308.1"; tss_id "TSS43333";  |
| chr21 | Cufflinks exon47016305 | 47022970 | . | + | . | gene_id "XLOC_034390"; transcript_id "TCONS_00057297"; exon_number "2"; oId "CUFF.61308.1"; tss_id "TSS43333";  |
| chr21 | Cufflinks exon47052087 | 47053938 | . | + | . | gene_id "XLOC_034391"; transcript_id "TCONS_00057299"; exon_number                                              |

"1"; oId "CUFF.61309.1"; tss\_id "TSS43334";  
chr21 Cufflinks exon47054282 47054704 . + . gene\_id "XLOC\_034391"; transcript\_id "TCONS\_00057299"; exon\_number  
"2"; oId "CUFF.61309.1"; tss\_id "TSS43334";  
chr21 Cufflinks exon16189476 16192351 . - . gene\_id "XLOC\_034477"; transcript\_id "TCONS\_00057443"; exon\_number  
"1"; oId "CUFF.60063.2"; tss\_id "TSS43446";  
chr21 Cufflinks exon16196447 16196736 . - . gene\_id "XLOC\_034477"; transcript\_id "TCONS\_00057443"; exon\_number  
"2"; oId "CUFF.60063.2"; tss\_id "TSS43446";  
chr21 Cufflinks exon16197844 16197945 . - . gene\_id "XLOC\_034477"; transcript\_id "TCONS\_00057443"; exon\_number  
"3"; oId "CUFF.60063.2"; tss\_id "TSS43446";  
chr21 Cufflinks exon16229863 16230001 . - . gene\_id "XLOC\_034477"; transcript\_id "TCONS\_00057443"; exon\_number  
"4"; oId "CUFF.60063.2"; tss\_id "TSS43446";  
chr21 Cufflinks exon16189476 16192351 . - . gene\_id "XLOC\_034477"; transcript\_id "TCONS\_00057444"; exon\_number  
"1"; oId "CUFF.60063.1"; tss\_id "TSS43447";  
chr21 Cufflinks exon16196447 16196736 . - . gene\_id "XLOC\_034477"; transcript\_id "TCONS\_00057444"; exon\_number  
"2"; oId "CUFF.60063.1"; tss\_id "TSS43447";  
chr21 Cufflinks exon16197844 16197945 . - . gene\_id "XLOC\_034477"; transcript\_id "TCONS\_00057444"; exon\_number  
"3"; oId "CUFF.60063.1"; tss\_id "TSS43447";  
chr21 Cufflinks exon16225595 16225752 . - . gene\_id "XLOC\_034477"; transcript\_id "TCONS\_00057444"; exon\_number  
"4"; oId "CUFF.60063.1"; tss\_id "TSS43447";  
chr21 Cufflinks exon16229863 16230029 . - . gene\_id "XLOC\_034477"; transcript\_id "TCONS\_00057444"; exon\_number  
"5"; oId "CUFF.60063.1"; tss\_id "TSS43447";  
chr21 Cufflinks exon16296984 16297069 . - . gene\_id "XLOC\_034477"; transcript\_id "TCONS\_00057444"; exon\_number  
"6"; oId "CUFF.60063.1"; tss\_id "TSS43447";  
chr21 Cufflinks exon30660224 30668663 . - . gene\_id "XLOC\_034522"; transcript\_id "TCONS\_00057516"; exon\_number  
"1"; oId "CUFF.60246.1"; tss\_id "TSS43507";  
chr21 Cufflinks exon30668927 30670610 . - . gene\_id "XLOC\_034522"; transcript\_id "TCONS\_00057516"; exon\_number  
"2"; oId "CUFF.60246.1"; tss\_id "TSS43507";  
chr21 Cufflinks exon35742765 35743459 . - . gene\_id "XLOC\_034595"; transcript\_id "TCONS\_00057615"; exon\_number  
"1"; oId "CUFF.60610.1"; tss\_id "TSS43594";  
chr21 Cufflinks exon35746023 35746148 . - . gene\_id "XLOC\_034595"; transcript\_id "TCONS\_00057615"; exon\_number  
"2"; oId "CUFF.60610.1"; tss\_id "TSS43594";  
chr21 Cufflinks exon35742765 35743459 . - . gene\_id "XLOC\_034595"; transcript\_id "TCONS\_00057616"; exon\_number  
"1"; oId "CUFF.60610.2"; tss\_id "TSS43595";  
chr21 Cufflinks exon35747536 35747658 . - . gene\_id "XLOC\_034595"; transcript\_id "TCONS\_00057616"; exon\_number  
"2"; oId "CUFF.60610.2"; tss\_id "TSS43595";  
chr21 Cufflinks exon40246616 40252296 . - . gene\_id "XLOC\_034654"; transcript\_id "TCONS\_00057713"; exon\_number  
"1"; oId "CUFF.60799.2"; tss\_id "TSS43679";  
chr21 Cufflinks exon40262744 40262879 . - . gene\_id "XLOC\_034654"; transcript\_id "TCONS\_00057713"; exon\_number  
"2"; oId "CUFF.60799.2"; tss\_id "TSS43679";  
chr21 Cufflinks exon40246616 40252296 . - . gene\_id "XLOC\_034654"; transcript\_id "TCONS\_00057714"; exon\_number  
"1"; oId "CUFF.60799.1"; tss\_id "TSS43680";  
chr21 Cufflinks exon40273825 40273889 . - . gene\_id "XLOC\_034654"; transcript\_id "TCONS\_00057714"; exon\_number  
"2"; oId "CUFF.60799.1"; tss\_id "TSS43680";



|       |                |          |          |   |   |   |                                                                                                                |
|-------|----------------|----------|----------|---|---|---|----------------------------------------------------------------------------------------------------------------|
| chr21 | Cufflinks exon | 40295562 | 40295617 | . | - | . | gene_id "XLOC_034654"; transcript_id "TCONS_00057714"; exon_number "3"; oId "CUFF.60799.1"; tss_id "TSS43680"; |
| chr21 | Cufflinks exon | 40309734 | 40310353 | . | - | . | gene_id "XLOC_034654"; transcript_id "TCONS_00057714"; exon_number "4"; oId "CUFF.60799.1"; tss_id "TSS43680"; |
| chr21 | Cufflinks exon | 40290985 | 40291440 | . | - | . | gene_id "XLOC_034654"; transcript_id "TCONS_00057719"; exon_number "1"; oId "CUFF.60799.3"; tss_id "TSS43680"; |
| chr21 | Cufflinks exon | 40292497 | 40292763 | . | - | . | gene_id "XLOC_034654"; transcript_id "TCONS_00057719"; exon_number "2"; oId "CUFF.60799.3"; tss_id "TSS43680"; |
| chr21 | Cufflinks exon | 40295350 | 40295437 | . | - | . | gene_id "XLOC_034654"; transcript_id "TCONS_00057719"; exon_number "3"; oId "CUFF.60799.3"; tss_id "TSS43680"; |
| chr21 | Cufflinks exon | 40295562 | 40295617 | . | - | . | gene_id "XLOC_034654"; transcript_id "TCONS_00057719"; exon_number "4"; oId "CUFF.60799.3"; tss_id "TSS43680"; |
| chr21 | Cufflinks exon | 40309734 | 40310353 | . | - | . | gene_id "XLOC_034654"; transcript_id "TCONS_00057719"; exon_number "5"; oId "CUFF.60799.3"; tss_id "TSS43680"; |
| chr21 | Cufflinks exon | 40358773 | 40359419 | . | - | . | gene_id "XLOC_034665"; transcript_id "TCONS_00057727"; exon_number "1"; oId "CUFF.60824.2"; tss_id "TSS43691"; |
| chr21 | Cufflinks exon | 40359517 | 40360682 | . | - | . | gene_id "XLOC_034665"; transcript_id "TCONS_00057727"; exon_number "2"; oId "CUFF.60824.2"; tss_id "TSS43691"; |
| chr21 | Cufflinks exon | 40360893 | 40361954 | . | - | . | gene_id "XLOC_034665"; transcript_id "TCONS_00057727"; exon_number "3"; oId "CUFF.60824.2"; tss_id "TSS43691"; |
| chr21 | Cufflinks exon | 40358773 | 40359419 | . | - | . | gene_id "XLOC_034665"; transcript_id "TCONS_00057726"; exon_number "1"; oId "CUFF.60824.1"; tss_id "TSS43691"; |
| chr21 | Cufflinks exon | 40359517 | 40361954 | . | - | . | gene_id "XLOC_034665"; transcript_id "TCONS_00057726"; exon_number "2"; oId "CUFF.60824.1"; tss_id "TSS43691"; |
| chr21 | Cufflinks exon | 40358773 | 40359419 | . | - | . | gene_id "XLOC_034665"; transcript_id "TCONS_00057728"; exon_number "1"; oId "CUFF.60824.4"; tss_id "TSS43692"; |
| chr21 | Cufflinks exon | 40359517 | 40360682 | . | - | . | gene_id "XLOC_034665"; transcript_id "TCONS_00057728"; exon_number "2"; oId "CUFF.60824.4"; tss_id "TSS43692"; |
| chr21 | Cufflinks exon | 40360893 | 40361019 | . | - | . | gene_id "XLOC_034665"; transcript_id "TCONS_00057728"; exon_number "3"; oId "CUFF.60824.4"; tss_id "TSS43692"; |
| chr21 | Cufflinks exon | 40361096 | 40361352 | . | - | . | gene_id "XLOC_034665"; transcript_id "TCONS_00057728"; exon_number "4"; oId "CUFF.60824.4"; tss_id "TSS43692"; |
| chr21 | Cufflinks exon | 40362753 | 40362868 | . | - | . | gene_id "XLOC_034665"; transcript_id "TCONS_00057728"; exon_number "5"; oId "CUFF.60824.4"; tss_id "TSS43692"; |
| chr21 | Cufflinks exon | 40358773 | 40359419 | . | - | . | gene_id "XLOC_034665"; transcript_id "TCONS_00057730"; exon_number "1"; oId "CUFF.60824.5"; tss_id "TSS43693"; |
| chr21 | Cufflinks exon | 40359517 | 40361352 | . | - | . | gene_id "XLOC_034665"; transcript_id "TCONS_00057730"; exon_number "2"; oId "CUFF.60824.5"; tss_id "TSS43693"; |
| chr21 | Cufflinks exon | 40377586 | 40378710 | . | - | . | gene_id "XLOC_034665"; transcript_id "TCONS_00057730"; exon_number "3"; oId "CUFF.60824.5"; tss_id "TSS43693"; |
| chr21 | Cufflinks exon | 40383014 | 40383375 | . | - | . | gene_id "XLOC_034665"; transcript_id "TCONS_00057730"; exon_number "4"; oId "CUFF.60824.5"; tss_id "TSS43693"; |
| chr21 | Cufflinks exon | 40388938 | 40389707 | . | - | . | gene_id "XLOC_034665"; transcript_id "TCONS_00057730"; exon_number                                             |

|                                             |       |                        |          |   |   |   |                                                                    |
|---------------------------------------------|-------|------------------------|----------|---|---|---|--------------------------------------------------------------------|
| "5"; oId "CUFF.60824.5"; tss_id "TSS43693"; | chr21 | Cufflinks exon40390941 | 40391211 | . | - | . | gene_id "XLOC_034665"; transcript_id "TCONS_00057730"; exon_number |
| "6"; oId "CUFF.60824.5"; tss_id "TSS43693"; | chr21 | Cufflinks exon40393196 | 40393398 | . | - | . | gene_id "XLOC_034665"; transcript_id "TCONS_00057730"; exon_number |
| "7"; oId "CUFF.60824.5"; tss_id "TSS43693"; | chr21 | Cufflinks exon40358773 | 40359419 | . | - | . | gene_id "XLOC_034665"; transcript_id "TCONS_00057729"; exon_number |
| "1"; oId "CUFF.60824.3"; tss_id "TSS43693"; | chr21 | Cufflinks exon40359517 | 40360683 | . | - | . | gene_id "XLOC_034665"; transcript_id "TCONS_00057729"; exon_number |
| "2"; oId "CUFF.60824.3"; tss_id "TSS43693"; | chr21 | Cufflinks exon40360893 | 40361016 | . | - | . | gene_id "XLOC_034665"; transcript_id "TCONS_00057729"; exon_number |
| "3"; oId "CUFF.60824.3"; tss_id "TSS43693"; | chr21 | Cufflinks exon40361096 | 40361352 | . | - | . | gene_id "XLOC_034665"; transcript_id "TCONS_00057729"; exon_number |
| "4"; oId "CUFF.60824.3"; tss_id "TSS43693"; | chr21 | Cufflinks exon40377586 | 40378710 | . | - | . | gene_id "XLOC_034665"; transcript_id "TCONS_00057729"; exon_number |
| "5"; oId "CUFF.60824.3"; tss_id "TSS43693"; | chr21 | Cufflinks exon40383014 | 40383375 | . | - | . | gene_id "XLOC_034665"; transcript_id "TCONS_00057729"; exon_number |
| "6"; oId "CUFF.60824.3"; tss_id "TSS43693"; | chr21 | Cufflinks exon40388938 | 40389707 | . | - | . | gene_id "XLOC_034665"; transcript_id "TCONS_00057729"; exon_number |
| "7"; oId "CUFF.60824.3"; tss_id "TSS43693"; | chr21 | Cufflinks exon40390941 | 40391211 | . | - | . | gene_id "XLOC_034665"; transcript_id "TCONS_00057729"; exon_number |
| "8"; oId "CUFF.60824.3"; tss_id "TSS43693"; | chr21 | Cufflinks exon40393196 | 40393398 | . | - | . | gene_id "XLOC_034665"; transcript_id "TCONS_00057729"; exon_number |
| "9"; oId "CUFF.60824.3"; tss_id "TSS43693"; | chr21 | Cufflinks exon40362919 | 40362950 | . | - | . | gene_id "XLOC_034665"; transcript_id "TCONS_00057731"; exon_number |
| "1"; oId "CUFF.60824.6"; tss_id "TSS43694"; | chr21 | Cufflinks exon40377586 | 40378710 | . | - | . | gene_id "XLOC_034665"; transcript_id "TCONS_00057731"; exon_number |
| "2"; oId "CUFF.60824.6"; tss_id "TSS43694"; | chr21 | Cufflinks exon40383014 | 40383324 | . | - | . | gene_id "XLOC_034665"; transcript_id "TCONS_00057731"; exon_number |
| "3"; oId "CUFF.60824.6"; tss_id "TSS43694"; | chr21 | Cufflinks exon40388938 | 40389037 | . | - | . | gene_id "XLOC_034665"; transcript_id "TCONS_00057731"; exon_number |
| "4"; oId "CUFF.60824.6"; tss_id "TSS43694"; | chr21 | Cufflinks exon40362919 | 40362950 | . | - | . | gene_id "XLOC_034665"; transcript_id "TCONS_00057732"; exon_number |
| "1"; oId "CUFF.60824.7"; tss_id "TSS43693"; | chr21 | Cufflinks exon40377586 | 40378710 | . | - | . | gene_id "XLOC_034665"; transcript_id "TCONS_00057732"; exon_number |
| "2"; oId "CUFF.60824.7"; tss_id "TSS43693"; | chr21 | Cufflinks exon40383014 | 40383375 | . | - | . | gene_id "XLOC_034665"; transcript_id "TCONS_00057732"; exon_number |
| "3"; oId "CUFF.60824.7"; tss_id "TSS43693"; | chr21 | Cufflinks exon40388938 | 40389707 | . | - | . | gene_id "XLOC_034665"; transcript_id "TCONS_00057732"; exon_number |
| "4"; oId "CUFF.60824.7"; tss_id "TSS43693"; | chr21 | Cufflinks exon40390941 | 40391211 | . | - | . | gene_id "XLOC_034665"; transcript_id "TCONS_00057732"; exon_number |
| "5"; oId "CUFF.60824.7"; tss_id "TSS43693"; | chr21 | Cufflinks exon40393196 | 40393398 | . | - | . | gene_id "XLOC_034665"; transcript_id "TCONS_00057732"; exon_number |
| "6"; oId "CUFF.60824.7"; tss_id "TSS43693"; |       |                        |          |   |   |   |                                                                    |

|       |                        |          |   |   |   |                                                                                                                 |
|-------|------------------------|----------|---|---|---|-----------------------------------------------------------------------------------------------------------------|
| chr21 | Cufflinks exon40373124 | 40373649 | . | - | . | gene_id "XLOC_034665"; transcript_id "TCONS_00057734"; exon_number "1"; oId "CUFF.60824.8"; tss_id "TSS43694";  |
| chr21 | Cufflinks exon40377586 | 40378710 | . | - | . | gene_id "XLOC_034665"; transcript_id "TCONS_00057734"; exon_number "2"; oId "CUFF.60824.8"; tss_id "TSS43694";  |
| chr21 | Cufflinks exon40383014 | 40383324 | . | - | . | gene_id "XLOC_034665"; transcript_id "TCONS_00057734"; exon_number "3"; oId "CUFF.60824.8"; tss_id "TSS43694";  |
| chr21 | Cufflinks exon40388938 | 40389037 | . | - | . | gene_id "XLOC_034665"; transcript_id "TCONS_00057734"; exon_number "4"; oId "CUFF.60824.8"; tss_id "TSS43694";  |
| chr21 | Cufflinks exon40377651 | 40378710 | . | - | . | gene_id "XLOC_034665"; transcript_id "TCONS_00057737"; exon_number "1"; oId "CUFF.60824.9"; tss_id "TSS43695";  |
| chr21 | Cufflinks exon40383014 | 40383376 | . | - | . | gene_id "XLOC_034665"; transcript_id "TCONS_00057737"; exon_number "2"; oId "CUFF.60824.9"; tss_id "TSS43695";  |
| chr21 | Cufflinks exon40388938 | 40389707 | . | - | . | gene_id "XLOC_034665"; transcript_id "TCONS_00057737"; exon_number "3"; oId "CUFF.60824.9"; tss_id "TSS43695";  |
| chr21 | Cufflinks exon40390924 | 40390940 | . | - | . | gene_id "XLOC_034665"; transcript_id "TCONS_00057737"; exon_number "4"; oId "CUFF.60824.9"; tss_id "TSS43695";  |
| chr21 | Cufflinks exon40377651 | 40378711 | . | - | . | gene_id "XLOC_034665"; transcript_id "TCONS_00057736"; exon_number "1"; oId "CUFF.60824.10"; tss_id "TSS43695"; |
| chr21 | Cufflinks exon40383015 | 40383376 | . | - | . | gene_id "XLOC_034665"; transcript_id "TCONS_00057736"; exon_number "2"; oId "CUFF.60824.10"; tss_id "TSS43695"; |
| chr21 | Cufflinks exon40388938 | 40389707 | . | - | . | gene_id "XLOC_034665"; transcript_id "TCONS_00057736"; exon_number "3"; oId "CUFF.60824.10"; tss_id "TSS43695"; |
| chr21 | Cufflinks exon40390924 | 40390940 | . | - | . | gene_id "XLOC_034665"; transcript_id "TCONS_00057736"; exon_number "4"; oId "CUFF.60824.10"; tss_id "TSS43695"; |
| chr21 | Cufflinks exon43390177 | 43393606 | . | - | . | gene_id "XLOC_034704"; transcript_id "TCONS_00057802"; exon_number "1"; oId "CUFF.60934.2"; tss_id "TSS43751";  |
| chr21 | Cufflinks exon43395770 | 43395809 | . | - | . | gene_id "XLOC_034704"; transcript_id "TCONS_00057802"; exon_number "2"; oId "CUFF.60934.2"; tss_id "TSS43751";  |
| chr21 | Cufflinks exon43390177 | 43394932 | . | - | . | gene_id "XLOC_034704"; transcript_id "TCONS_00057803"; exon_number "1"; oId "CUFF.60934.1"; tss_id "TSS43752";  |
| chr21 | Cufflinks exon43395770 | 43396090 | . | - | . | gene_id "XLOC_034704"; transcript_id "TCONS_00057803"; exon_number "2"; oId "CUFF.60934.1"; tss_id "TSS43752";  |
| chr21 | Cufflinks exon43471448 | 43471863 | . | - | . | gene_id "XLOC_034706"; transcript_id "TCONS_00057808"; exon_number "1"; oId "CUFF.60945.2"; tss_id "TSS43756";  |
| chr21 | Cufflinks exon43471959 | 43472077 | . | - | . | gene_id "XLOC_034706"; transcript_id "TCONS_00057808"; exon_number "2"; oId "CUFF.60945.2"; tss_id "TSS43756";  |
| chr21 | Cufflinks exon43471448 | 43471868 | . | - | . | gene_id "XLOC_034706"; transcript_id "TCONS_00057809"; exon_number "1"; oId "CUFF.60945.1"; tss_id "TSS43757";  |
| chr21 | Cufflinks exon43471959 | 43472104 | . | - | . | gene_id "XLOC_034706"; transcript_id "TCONS_00057809"; exon_number "2"; oId "CUFF.60945.1"; tss_id "TSS43757";  |
| chr21 | Cufflinks exon43472209 | 43477365 | . | - | . | gene_id "XLOC_034706"; transcript_id "TCONS_00057809"; exon_number "3"; oId "CUFF.60945.1"; tss_id "TSS43757";  |
| chr21 | Cufflinks exon44310233 | 44310721 | . | - | . | gene_id "XLOC_034729"; transcript_id "TCONS_00057844"; exon_number                                              |

|                                             |   |   |   |                                                                    |  |
|---------------------------------------------|---|---|---|--------------------------------------------------------------------|--|
| "1"; oId "CUFF.61021.2"; tss_id "TSS43784"; |   |   |   |                                                                    |  |
| chr21 Cufflinks exon44311503 44311693       | . | - | . | gene_id "XLOC_034729"; transcript_id "TCONS_00057844"; exon_number |  |
| "2"; oId "CUFF.61021.2"; tss_id "TSS43784"; |   |   |   |                                                                    |  |
| chr21 Cufflinks exon44312518 44313192       | . | - | . | gene_id "XLOC_034729"; transcript_id "TCONS_00057844"; exon_number |  |
| "3"; oId "CUFF.61021.2"; tss_id "TSS43784"; |   |   |   |                                                                    |  |
| chr21 Cufflinks exon44310233 44310721       | . | - | . | gene_id "XLOC_034729"; transcript_id "TCONS_00057843"; exon_number |  |
| "1"; oId "CUFF.61021.1"; tss_id "TSS43784"; |   |   |   |                                                                    |  |
| chr21 Cufflinks exon44311503 44313192       | . | - | . | gene_id "XLOC_034729"; transcript_id "TCONS_00057843"; exon_number |  |
| "2"; oId "CUFF.61021.1"; tss_id "TSS43784"; |   |   |   |                                                                    |  |
| chr21 Cufflinks exon44775355 44779366       | . | - | . | gene_id "XLOC_034738"; transcript_id "TCONS_00057855"; exon_number |  |
| "1"; oId "CUFF.61091.3"; tss_id "TSS43794"; |   |   |   |                                                                    |  |
| chr21 Cufflinks exon44780772 44782291       | . | - | . | gene_id "XLOC_034738"; transcript_id "TCONS_00057855"; exon_number |  |
| "2"; oId "CUFF.61091.3"; tss_id "TSS43794"; |   |   |   |                                                                    |  |
| chr21 Cufflinks exon44775355 44779366       | . | - | . | gene_id "XLOC_034738"; transcript_id "TCONS_00057856"; exon_number |  |
| "1"; oId "CUFF.61091.4"; tss_id "TSS43794"; |   |   |   |                                                                    |  |
| chr21 Cufflinks exon44780355 44782335       | . | - | . | gene_id "XLOC_034738"; transcript_id "TCONS_00057856"; exon_number |  |
| "2"; oId "CUFF.61091.4"; tss_id "TSS43794"; |   |   |   |                                                                    |  |
| chr21 Cufflinks exon44775355 44779366       | . | - | . | gene_id "XLOC_034738"; transcript_id "TCONS_00057858"; exon_number |  |
| "1"; oId "CUFF.61091.2"; tss_id "TSS43795"; |   |   |   |                                                                    |  |
| chr21 Cufflinks exon44781863 44782542       | . | - | . | gene_id "XLOC_034738"; transcript_id "TCONS_00057858"; exon_number |  |
| "2"; oId "CUFF.61091.2"; tss_id "TSS43795"; |   |   |   |                                                                    |  |
| chr21 Cufflinks exon44775355 44779366       | . | - | . | gene_id "XLOC_034738"; transcript_id "TCONS_00057857"; exon_number |  |
| "1"; oId "CUFF.61091.1"; tss_id "TSS43795"; |   |   |   |                                                                    |  |
| chr21 Cufflinks exon44781365 44782542       | . | - | . | gene_id "XLOC_034738"; transcript_id "TCONS_00057857"; exon_number |  |
| "2"; oId "CUFF.61091.1"; tss_id "TSS43795"; |   |   |   |                                                                    |  |
| chr21 Cufflinks exon45578833 45579237       | . | - | . | gene_id "XLOC_034781"; transcript_id "TCONS_00057910"; exon_number |  |
| "1"; oId "CUFF.61182.1"; tss_id "TSS43841"; |   |   |   |                                                                    |  |
| chr21 Cufflinks exon45579413 45579704       | . | - | . | gene_id "XLOC_034781"; transcript_id "TCONS_00057910"; exon_number |  |
| "2"; oId "CUFF.61182.1"; tss_id "TSS43841"; |   |   |   |                                                                    |  |
| chr21 Cufflinks exon45609632 45609637       | . | - | . | gene_id "XLOC_034782"; transcript_id "TCONS_00057911"; exon_number |  |
| "1"; oId "CUFF.61186.1"; tss_id "TSS43842"; |   |   |   |                                                                    |  |
| chr21 Cufflinks exon45620722 45620898       | . | - | . | gene_id "XLOC_034782"; transcript_id "TCONS_00057911"; exon_number |  |
| "2"; oId "CUFF.61186.1"; tss_id "TSS43842"; |   |   |   |                                                                    |  |
| chr21 Cufflinks exon45621706 45624130       | . | - | . | gene_id "XLOC_034782"; transcript_id "TCONS_00057911"; exon_number |  |
| "3"; oId "CUFF.61186.1"; tss_id "TSS43842"; |   |   |   |                                                                    |  |
| chr21 Cufflinks exon46414282 46419574       | . | - | . | gene_id "XLOC_034807"; transcript_id "TCONS_00057955"; exon_number |  |
| "1"; oId "CUFF.61267.3"; tss_id "TSS43878"; |   |   |   |                                                                    |  |
| chr21 Cufflinks exon46424359 46425019       | . | - | . | gene_id "XLOC_034807"; transcript_id "TCONS_00057955"; exon_number |  |
| "2"; oId "CUFF.61267.3"; tss_id "TSS43878"; |   |   |   |                                                                    |  |
| chr21 Cufflinks exon46414282 46419571       | . | - | . | gene_id "XLOC_034807"; transcript_id "TCONS_00057954"; exon_number |  |
| "1"; oId "CUFF.61267.2"; tss_id "TSS43878"; |   |   |   |                                                                    |  |
| chr21 Cufflinks exon46424371 46425019       | . | - | . | gene_id "XLOC_034807"; transcript_id "TCONS_00057954"; exon_number |  |
| "2"; oId "CUFF.61267.2"; tss_id "TSS43878"; |   |   |   |                                                                    |  |

|       |                        |          |   |   |   |                                                                                                                |
|-------|------------------------|----------|---|---|---|----------------------------------------------------------------------------------------------------------------|
| chr21 | Cufflinks exon46414282 | 46419571 | . | - | . | gene_id "XLOC_034807"; transcript_id "TCONS_00057953"; exon_number "1"; oId "CUFF.61267.1"; tss_id "TSS43878"; |
| chr21 | Cufflinks exon46424359 | 46425019 | . | - | . | gene_id "XLOC_034807"; transcript_id "TCONS_00057953"; exon_number "2"; oId "CUFF.61267.1"; tss_id "TSS43878"; |
| chr21 | Cufflinks exon46423661 | 46423956 | . | - | . | gene_id "XLOC_034807"; transcript_id "TCONS_00057956"; exon_number "1"; oId "CUFF.61267.4"; tss_id "TSS43879"; |
| chr21 | Cufflinks exon46424359 | 46424500 | . | - | . | gene_id "XLOC_034807"; transcript_id "TCONS_00057956"; exon_number "2"; oId "CUFF.61267.4"; tss_id "TSS43879"; |
| chr22 | Cufflinks exon18259554 | 18260462 | . | + | . | gene_id "XLOC_034863"; transcript_id "TCONS_00058051"; exon_number "1"; oId "CUFF.61571.1"; tss_id "TSS43948"; |
| chr22 | Cufflinks exon18261019 | 18268994 | . | + | . | gene_id "XLOC_034863"; transcript_id "TCONS_00058051"; exon_number "2"; oId "CUFF.61571.1"; tss_id "TSS43948"; |
| chr22 | Cufflinks exon19159191 | 19166114 | . | + | . | gene_id "XLOC_034881"; transcript_id "TCONS_00058080"; exon_number "1"; oId "CUFF.61632.1"; tss_id "TSS43968"; |
| chr22 | Cufflinks exon19166868 | 19167302 | . | + | . | gene_id "XLOC_034881"; transcript_id "TCONS_00058080"; exon_number "2"; oId "CUFF.61632.1"; tss_id "TSS43968"; |
| chr22 | Cufflinks exon19159196 | 19160650 | . | + | . | gene_id "XLOC_034881"; transcript_id "TCONS_00058081"; exon_number "1"; oId "CUFF.61632.2"; tss_id "TSS43968"; |
| chr22 | Cufflinks exon19161221 | 19161611 | . | + | . | gene_id "XLOC_034881"; transcript_id "TCONS_00058081"; exon_number "2"; oId "CUFF.61632.2"; tss_id "TSS43968"; |
| chr22 | Cufflinks exon22478399 | 22478576 | . | + | . | gene_id "XLOC_034941"; transcript_id "TCONS_00058209"; exon_number "1"; oId "CUFF.61857.2"; tss_id "TSS44057"; |
| chr22 | Cufflinks exon22480351 | 22480531 | . | + | . | gene_id "XLOC_034941"; transcript_id "TCONS_00058209"; exon_number "2"; oId "CUFF.61857.2"; tss_id "TSS44057"; |
| chr22 | Cufflinks exon22510010 | 22510515 | . | + | . | gene_id "XLOC_034941"; transcript_id "TCONS_00058209"; exon_number "3"; oId "CUFF.61857.2"; tss_id "TSS44057"; |
| chr22 | Cufflinks exon22512655 | 22512867 | . | + | . | gene_id "XLOC_034941"; transcript_id "TCONS_00058209"; exon_number "4"; oId "CUFF.61857.2"; tss_id "TSS44057"; |
| chr22 | Cufflinks exon22517910 | 22518497 | . | + | . | gene_id "XLOC_034941"; transcript_id "TCONS_00058209"; exon_number "5"; oId "CUFF.61857.2"; tss_id "TSS44057"; |
| chr22 | Cufflinks exon22518933 | 22523179 | . | + | . | gene_id "XLOC_034941"; transcript_id "TCONS_00058209"; exon_number "6"; oId "CUFF.61857.2"; tss_id "TSS44057"; |
| chr22 | Cufflinks exon22523353 | 22524689 | . | + | . | gene_id "XLOC_034941"; transcript_id "TCONS_00058209"; exon_number "7"; oId "CUFF.61857.2"; tss_id "TSS44057"; |
| chr22 | Cufflinks exon22480062 | 22480311 | . | + | . | gene_id "XLOC_034941"; transcript_id "TCONS_00058212"; exon_number "1"; oId "CUFF.61857.7"; tss_id "TSS44058"; |
| chr22 | Cufflinks exon22510010 | 22510682 | . | + | . | gene_id "XLOC_034941"; transcript_id "TCONS_00058212"; exon_number "2"; oId "CUFF.61857.7"; tss_id "TSS44058"; |
| chr22 | Cufflinks exon22480062 | 22480312 | . | + | . | gene_id "XLOC_034941"; transcript_id "TCONS_00058211"; exon_number "1"; oId "CUFF.61857.5"; tss_id "TSS44058"; |
| chr22 | Cufflinks exon22510010 | 22510682 | . | + | . | gene_id "XLOC_034941"; transcript_id "TCONS_00058211"; exon_number "2"; oId "CUFF.61857.5"; tss_id "TSS44058"; |
| chr22 | Cufflinks exon22480062 | 22480531 | . | + | . | gene_id "XLOC_034941"; transcript_id "TCONS_00058210"; exon_number "1"; oId "CUFF.61857.5"; tss_id "TSS44058"; |

"1"; oId "CUFF.61857.4"; tss\_id "TSS44058";  
chr22 Cufflinks exon22510010 22510682 . + . gene\_id "XLOC\_034941"; transcript\_id "TCONS\_00058210"; exon\_number  
"2"; oId "CUFF.61857.4"; tss\_id "TSS44058";  
chr22 Cufflinks exon22480063 22480311 . + . gene\_id "XLOC\_034941"; transcript\_id "TCONS\_00058213"; exon\_number  
"1"; oId "CUFF.61857.8"; tss\_id "TSS44058";  
chr22 Cufflinks exon22512655 22512867 . + . gene\_id "XLOC\_034941"; transcript\_id "TCONS\_00058213"; exon\_number  
"2"; oId "CUFF.61857.8"; tss\_id "TSS44058";  
chr22 Cufflinks exon22516765 22516929 . + . gene\_id "XLOC\_034941"; transcript\_id "TCONS\_00058213"; exon\_number  
"3"; oId "CUFF.61857.8"; tss\_id "TSS44058";  
chr22 Cufflinks exon22517910 22519028 . + . gene\_id "XLOC\_034941"; transcript\_id "TCONS\_00058213"; exon\_number  
"4"; oId "CUFF.61857.8"; tss\_id "TSS44058";  
chr22 Cufflinks exon22480250 22480311 . + . gene\_id "XLOC\_034941"; transcript\_id "TCONS\_00058214"; exon\_number  
"1"; oId "CUFF.61857.9"; tss\_id "TSS44059";  
chr22 Cufflinks exon22526108 22526292 . + . gene\_id "XLOC\_034941"; transcript\_id "TCONS\_00058214"; exon\_number  
"2"; oId "CUFF.61857.9"; tss\_id "TSS44059";  
chr22 Cufflinks exon22531380 22531513 . + . gene\_id "XLOC\_034941"; transcript\_id "TCONS\_00058214"; exon\_number  
"3"; oId "CUFF.61857.9"; tss\_id "TSS44059";  
chr22 Cufflinks exon22730552 22730584 . + . gene\_id "XLOC\_034941"; transcript\_id "TCONS\_00058214"; exon\_number  
"4"; oId "CUFF.61857.9"; tss\_id "TSS44059";  
chr22 Cufflinks exon22678288 22680124 . + . gene\_id "XLOC\_034960"; transcript\_id "TCONS\_00058252"; exon\_number  
"1"; oId "CUFF.61894.1"; tss\_id "TSS44080";  
chr22 Cufflinks exon22761832 22761885 . + . gene\_id "XLOC\_034960"; transcript\_id "TCONS\_00058252"; exon\_number  
"2"; oId "CUFF.61894.1"; tss\_id "TSS44080";  
chr22 Cufflinks exon 23775694 23776522 . + . gene\_id "XLOC\_034988"; transcript\_id "TCONS\_00058291";  
exon\_number "1"; oId "CUFF.61955.1"; tss\_id "TSS44111";  
chr22 Cufflinks exon 23776747 23776917 . + . gene\_id "XLOC\_034988"; transcript\_id "TCONS\_00058291";  
exon\_number "2"; oId "CUFF.61955.1"; tss\_id "TSS44111";  
chr22 Cufflinks exon 23802540 23807778 . + . gene\_id "XLOC\_034988"; transcript\_id "TCONS\_00058291";  
exon\_number "3"; oId "CUFF.61955.1"; tss\_id "TSS44111";  
chr22 Cufflinks exon 23775696 23776248 . + . gene\_id "XLOC\_034988"; transcript\_id "TCONS\_00058294";  
exon\_number "1"; oId "CUFF.61955.4"; tss\_id "TSS44111";  
chr22 Cufflinks exon 23776747 23776917 . + . gene\_id "XLOC\_034988"; transcript\_id "TCONS\_00058294";  
exon\_number "2"; oId "CUFF.61955.4"; tss\_id "TSS44111";  
chr22 Cufflinks exon 23777011 23777263 . + . gene\_id "XLOC\_034988"; transcript\_id "TCONS\_00058294";  
exon\_number "3"; oId "CUFF.61955.4"; tss\_id "TSS44111";  
chr22 Cufflinks exon 23802540 23807778 . + . gene\_id "XLOC\_034988"; transcript\_id "TCONS\_00058294";  
exon\_number "4"; oId "CUFF.61955.4"; tss\_id "TSS44111";  
chr22 Cufflinks exon 23775696 23776522 . + . gene\_id "XLOC\_034988"; transcript\_id "TCONS\_00058293";  
exon\_number "1"; oId "CUFF.61955.3"; tss\_id "TSS44111";  
chr22 Cufflinks exon 23802540 23807778 . + . gene\_id "XLOC\_034988"; transcript\_id "TCONS\_00058293";  
exon\_number "2"; oId "CUFF.61955.3"; tss\_id "TSS44111";  
chr22 Cufflinks exon 23775696 23776248 . + . gene\_id "XLOC\_034988"; transcript\_id "TCONS\_00058292";  
exon\_number "1"; oId "CUFF.61955.2"; tss\_id "TSS44111";

|                  |      |                  |          |             |   |   |                                                        |
|------------------|------|------------------|----------|-------------|---|---|--------------------------------------------------------|
| chr22 Cufflinks  | exon | 23776747         | 23776917 | .           | + | . | gene_id "XLOC_034988"; transcript_id "TCONS_00058292"; |
| exon_number "2"; | oId  | "CUFF.61955.2";  | tss_id   | "TSS44111"; |   |   |                                                        |
| chr22 Cufflinks  | exon | 23802540         | 23803082 | .           | + | . | gene_id "XLOC_034988"; transcript_id "TCONS_00058292"; |
| exon_number "3"; | oId  | "CUFF.61955.2";  | tss_id   | "TSS44111"; |   |   |                                                        |
| chr22 Cufflinks  | exon | 23804314         | 23807778 | .           | + | . | gene_id "XLOC_034988"; transcript_id "TCONS_00058292"; |
| exon_number "4"; | oId  | "CUFF.61955.2";  | tss_id   | "TSS44111"; |   |   |                                                        |
| chr22 Cufflinks  | exon | 23797682         | 23800670 | .           | + | . | gene_id "XLOC_034988"; transcript_id "TCONS_00058299"; |
| exon_number "1"; | oId  | "CUFF.61955.6";  | tss_id   | "TSS44112"; |   |   |                                                        |
| chr22 Cufflinks  | exon | 23802540         | 23807778 | .           | + | . | gene_id "XLOC_034988"; transcript_id "TCONS_00058299"; |
| exon_number "2"; | oId  | "CUFF.61955.6";  | tss_id   | "TSS44112"; |   |   |                                                        |
| chr22 Cufflinks  | exon | 23797682         | 23799380 | .           | + | . | gene_id "XLOC_034988"; transcript_id "TCONS_00058298"; |
| exon_number "1"; | oId  | "CUFF.61955.5";  | tss_id   | "TSS44112"; |   |   |                                                        |
| chr22 Cufflinks  | exon | 23802540         | 23807778 | .           | + | . | gene_id "XLOC_034988"; transcript_id "TCONS_00058298"; |
| exon_number "2"; | oId  | "CUFF.61955.5";  | tss_id   | "TSS44112"; |   |   |                                                        |
| chr22 Cufflinks  | exon | 23798602         | 23799380 | .           | + | . | gene_id "XLOC_034988"; transcript_id "TCONS_00058300"; |
| exon_number "1"; | oId  | "CUFF.61955.7";  | tss_id   | "TSS44113"; |   |   |                                                        |
| chr22 Cufflinks  | exon | 23802540         | 23803082 | .           | + | . | gene_id "XLOC_034988"; transcript_id "TCONS_00058300"; |
| exon_number "2"; | oId  | "CUFF.61955.7";  | tss_id   | "TSS44113"; |   |   |                                                        |
| chr22 Cufflinks  | exon | 23804314         | 23807778 | .           | + | . | gene_id "XLOC_034988"; transcript_id "TCONS_00058300"; |
| exon_number "3"; | oId  | "CUFF.61955.7";  | tss_id   | "TSS44113"; |   |   |                                                        |
| chr22 Cufflinks  | exon | 23799529         | 23799756 | .           | + | . | gene_id "XLOC_034988"; transcript_id "TCONS_00058301"; |
| exon_number "1"; | oId  | "CUFF.61955.8";  | tss_id   | "TSS44114"; |   |   |                                                        |
| chr22 Cufflinks  | exon | 23802540         | 23807778 | .           | + | . | gene_id "XLOC_034988"; transcript_id "TCONS_00058301"; |
| exon_number "2"; | oId  | "CUFF.61955.8";  | tss_id   | "TSS44114"; |   |   |                                                        |
| chr22 Cufflinks  | exon | 23800883         | 23801292 | .           | + | . | gene_id "XLOC_034988"; transcript_id "TCONS_00058302"; |
| exon_number "1"; | oId  | "CUFF.61955.10"; | tss_id   | "TSS44115"; |   |   |                                                        |
| chr22 Cufflinks  | exon | 23802545         | 23807778 | .           | + | . | gene_id "XLOC_034988"; transcript_id "TCONS_00058302"; |
| exon_number "2"; | oId  | "CUFF.61955.10"; | tss_id   | "TSS44115"; |   |   |                                                        |
| chr22 Cufflinks  | exon | 26444446         | 26445287 | .           | + | . | gene_id "XLOC_035065"; transcript_id "TCONS_00058423"; |
| exon_number "1"; | oId  | "CUFF.62224.2";  | tss_id   | "TSS44211"; |   |   |                                                        |
| chr22 Cufflinks  | exon | 26446561         | 26446624 | .           | + | . | gene_id "XLOC_035065"; transcript_id "TCONS_00058423"; |
| exon_number "2"; | oId  | "CUFF.62224.2";  | tss_id   | "TSS44211"; |   |   |                                                        |
| chr22 Cufflinks  | exon | 26452329         | 26452488 | .           | + | . | gene_id "XLOC_035065"; transcript_id "TCONS_00058423"; |
| exon_number "3"; | oId  | "CUFF.62224.2";  | tss_id   | "TSS44211"; |   |   |                                                        |
| chr22 Cufflinks  | exon | 26452588         | 26455322 | .           | + | . | gene_id "XLOC_035065"; transcript_id "TCONS_00058423"; |
| exon_number "4"; | oId  | "CUFF.62224.2";  | tss_id   | "TSS44211"; |   |   |                                                        |
| chr22 Cufflinks  | exon | 26469444         | 26475530 | .           | + | . | gene_id "XLOC_035065"; transcript_id "TCONS_00058423"; |
| exon_number "5"; | oId  | "CUFF.62224.2";  | tss_id   | "TSS44211"; |   |   |                                                        |
| chr22 Cufflinks  | exon | 26444446         | 26445288 | .           | + | . | gene_id "XLOC_035065"; transcript_id "TCONS_00058422"; |
| exon_number "1"; | oId  | "CUFF.62224.1";  | tss_id   | "TSS44211"; |   |   |                                                        |
| chr22 Cufflinks  | exon | 26446566         | 26446624 | .           | + | . | gene_id "XLOC_035065"; transcript_id "TCONS_00058422"; |
| exon_number "2"; | oId  | "CUFF.62224.1";  | tss_id   | "TSS44211"; |   |   |                                                        |
| chr22 Cufflinks  | exon | 26447440         | 26447531 | .           | + | . | gene_id "XLOC_035065"; transcript_id "TCONS_00058422"; |

exon\_number "3"; oId "CUFF.62224.1"; tss\_id "TSS44211";  
chr22 Cufflinks exon 26452329 26452488 . + . gene\_id "XLOC\_035065"; transcript\_id "TCONS\_00058422";  
exon\_number "4"; oId "CUFF.62224.1"; tss\_id "TSS44211";  
chr22 Cufflinks exon 26452588 26455322 . + . gene\_id "XLOC\_035065"; transcript\_id "TCONS\_00058422";  
exon\_number "5"; oId "CUFF.62224.1"; tss\_id "TSS44211";  
chr22 Cufflinks exon 26469444 26475530 . + . gene\_id "XLOC\_035065"; transcript\_id "TCONS\_00058422";  
exon\_number "6"; oId "CUFF.62224.1"; tss\_id "TSS44211";  
chr22 Cufflinks exon 26446572 26446633 . + . gene\_id "XLOC\_035065"; transcript\_id "TCONS\_00058425";  
exon\_number "1"; oId "CUFF.62224.3"; tss\_id "TSS44212";  
chr22 Cufflinks exon 26451323 26451393 . + . gene\_id "XLOC\_035065"; transcript\_id "TCONS\_00058425";  
exon\_number "2"; oId "CUFF.62224.3"; tss\_id "TSS44212";  
chr22 Cufflinks exon 26452329 26452488 . + . gene\_id "XLOC\_035065"; transcript\_id "TCONS\_00058425";  
exon\_number "3"; oId "CUFF.62224.3"; tss\_id "TSS44212";  
chr22 Cufflinks exon 26452588 26455322 . + . gene\_id "XLOC\_035065"; transcript\_id "TCONS\_00058425";  
exon\_number "4"; oId "CUFF.62224.3"; tss\_id "TSS44212";  
chr22 Cufflinks exon 26469444 26475530 . + . gene\_id "XLOC\_035065"; transcript\_id "TCONS\_00058425";  
exon\_number "5"; oId "CUFF.62224.3"; tss\_id "TSS44212";  
chr22 Cufflinks exon 26908476 26909000 . + . gene\_id "XLOC\_035078"; transcript\_id "TCONS\_00058442";  
exon\_number "1"; oId "CUFF.62249.2"; tss\_id "TSS44227";  
chr22 Cufflinks exon 26909378 26910541 . + . gene\_id "XLOC\_035078"; transcript\_id "TCONS\_00058442";  
exon\_number "2"; oId "CUFF.62249.2"; tss\_id "TSS44227";  
chr22 Cufflinks exon 27053446 27053618 . + . gene\_id "XLOC\_035082"; transcript\_id "TCONS\_00058450";  
exon\_number "1"; oId "CUFF.62265.8"; tss\_id "TSS44234";  
chr22 Cufflinks exon 27059280 27059362 . + . gene\_id "XLOC\_035082"; transcript\_id "TCONS\_00058450";  
exon\_number "2"; oId "CUFF.62265.8"; tss\_id "TSS44234";  
chr22 Cufflinks exon 27061495 27062900 . + . gene\_id "XLOC\_035082"; transcript\_id "TCONS\_00058450";  
exon\_number "3"; oId "CUFF.62265.8"; tss\_id "TSS44234";  
chr22 Cufflinks exon 27064121 27072440 . + . gene\_id "XLOC\_035082"; transcript\_id "TCONS\_00058450";  
exon\_number "4"; oId "CUFF.62265.8"; tss\_id "TSS44234";  
chr22 Cufflinks exon 27053446 27053618 . + . gene\_id "XLOC\_035082"; transcript\_id "TCONS\_00058449";  
exon\_number "1"; oId "CUFF.62265.3"; tss\_id "TSS44234";  
chr22 Cufflinks exon 27059280 27059362 . + . gene\_id "XLOC\_035082"; transcript\_id "TCONS\_00058449";  
exon\_number "2"; oId "CUFF.62265.3"; tss\_id "TSS44234";  
chr22 Cufflinks exon 27061495 27062900 . + . gene\_id "XLOC\_035082"; transcript\_id "TCONS\_00058449";  
exon\_number "3"; oId "CUFF.62265.3"; tss\_id "TSS44234";  
chr22 Cufflinks exon 27063148 27063273 . + . gene\_id "XLOC\_035082"; transcript\_id "TCONS\_00058449";  
exon\_number "4"; oId "CUFF.62265.3"; tss\_id "TSS44234";  
chr22 Cufflinks exon 27064121 27072440 . + . gene\_id "XLOC\_035082"; transcript\_id "TCONS\_00058449";  
exon\_number "5"; oId "CUFF.62265.3"; tss\_id "TSS44234";  
chr22 Cufflinks exon 27053446 27053618 . + . gene\_id "XLOC\_035082"; transcript\_id "TCONS\_00058454";  
exon\_number "1"; oId "CUFF.62265.7"; tss\_id "TSS44234";  
chr22 Cufflinks exon 27059280 27059362 . + . gene\_id "XLOC\_035082"; transcript\_id "TCONS\_00058454";  
exon\_number "2"; oId "CUFF.62265.7"; tss\_id "TSS44234";



chr22 Cufflinks exon 27061495 27062900 . + . gene\_id "XLOC\_035082"; transcript\_id "TCONS\_00058454";  
exon\_number "3"; oId "CUFF.62265.7"; tss\_id "TSS44234";  
chr22 Cufflinks exon 27064121 27068950 . + . gene\_id "XLOC\_035082"; transcript\_id "TCONS\_00058454";  
exon\_number "4"; oId "CUFF.62265.7"; tss\_id "TSS44234";  
chr22 Cufflinks exon 27113216 27113422 . + . gene\_id "XLOC\_035082"; transcript\_id "TCONS\_00058454";  
exon\_number "5"; oId "CUFF.62265.7"; tss\_id "TSS44234";  
chr22 Cufflinks exon 27114103 27116439 . + . gene\_id "XLOC\_035082"; transcript\_id "TCONS\_00058454";  
exon\_number "6"; oId "CUFF.62265.7"; tss\_id "TSS44234";  
chr22 Cufflinks exon 27116464 27118964 . + . gene\_id "XLOC\_035082"; transcript\_id "TCONS\_00058454";  
exon\_number "7"; oId "CUFF.62265.7"; tss\_id "TSS44234";  
chr22 Cufflinks exon 27053446 27053618 . + . gene\_id "XLOC\_035082"; transcript\_id "TCONS\_00058453";  
exon\_number "1"; oId "CUFF.62265.6"; tss\_id "TSS44234";  
chr22 Cufflinks exon 27059280 27059362 . + . gene\_id "XLOC\_035082"; transcript\_id "TCONS\_00058453";  
exon\_number "2"; oId "CUFF.62265.6"; tss\_id "TSS44234";  
chr22 Cufflinks exon 27061421 27062900 . + . gene\_id "XLOC\_035082"; transcript\_id "TCONS\_00058453";  
exon\_number "3"; oId "CUFF.62265.6"; tss\_id "TSS44234";  
chr22 Cufflinks exon 27064121 27068950 . + . gene\_id "XLOC\_035082"; transcript\_id "TCONS\_00058453";  
exon\_number "4"; oId "CUFF.62265.6"; tss\_id "TSS44234";  
chr22 Cufflinks exon 27089644 27089799 . + . gene\_id "XLOC\_035082"; transcript\_id "TCONS\_00058453";  
exon\_number "5"; oId "CUFF.62265.6"; tss\_id "TSS44234";  
chr22 Cufflinks exon 27113216 27113422 . + . gene\_id "XLOC\_035082"; transcript\_id "TCONS\_00058453";  
exon\_number "6"; oId "CUFF.62265.6"; tss\_id "TSS44234";  
chr22 Cufflinks exon 27114103 27118964 . + . gene\_id "XLOC\_035082"; transcript\_id "TCONS\_00058453";  
exon\_number "7"; oId "CUFF.62265.6"; tss\_id "TSS44234";  
chr22 Cufflinks exon 27053446 27053618 . + . gene\_id "XLOC\_035082"; transcript\_id "TCONS\_00058452";  
exon\_number "1"; oId "CUFF.62265.5"; tss\_id "TSS44234";  
chr22 Cufflinks exon 27059280 27059362 . + . gene\_id "XLOC\_035082"; transcript\_id "TCONS\_00058452";  
exon\_number "2"; oId "CUFF.62265.5"; tss\_id "TSS44234";  
chr22 Cufflinks exon 27061421 27062900 . + . gene\_id "XLOC\_035082"; transcript\_id "TCONS\_00058452";  
exon\_number "3"; oId "CUFF.62265.5"; tss\_id "TSS44234";  
chr22 Cufflinks exon 27064121 27068950 . + . gene\_id "XLOC\_035082"; transcript\_id "TCONS\_00058452";  
exon\_number "4"; oId "CUFF.62265.5"; tss\_id "TSS44234";  
chr22 Cufflinks exon 27113216 27113422 . + . gene\_id "XLOC\_035082"; transcript\_id "TCONS\_00058452";  
exon\_number "5"; oId "CUFF.62265.5"; tss\_id "TSS44234";  
chr22 Cufflinks exon 27114103 27118964 . + . gene\_id "XLOC\_035082"; transcript\_id "TCONS\_00058452";  
exon\_number "6"; oId "CUFF.62265.5"; tss\_id "TSS44234";  
chr22 Cufflinks exon 27053446 27053618 . + . gene\_id "XLOC\_035082"; transcript\_id "TCONS\_00058451";  
exon\_number "1"; oId "CUFF.62265.10"; tss\_id "TSS44234";  
chr22 Cufflinks exon 27059280 27059362 . + . gene\_id "XLOC\_035082"; transcript\_id "TCONS\_00058451";  
exon\_number "2"; oId "CUFF.62265.10"; tss\_id "TSS44234";  
chr22 Cufflinks exon 27061495 27062900 . + . gene\_id "XLOC\_035082"; transcript\_id "TCONS\_00058451";  
exon\_number "3"; oId "CUFF.62265.10"; tss\_id "TSS44234";  
chr22 Cufflinks exon 27063148 27063273 . + . gene\_id "XLOC\_035082"; transcript\_id "TCONS\_00058451";

exon\_number "4"; oId "CUFF.62265.10"; tss\_id "TSS44234";  
 chr22 Cufflinks exon 27064121 27068950 . + . gene\_id "XLOC\_035082"; transcript\_id "TCONS\_00058451";  
 exon\_number "5"; oId "CUFF.62265.10"; tss\_id "TSS44234";  
 chr22 Cufflinks exon 27113216 27113422 . + . gene\_id "XLOC\_035082"; transcript\_id "TCONS\_00058451";  
 exon\_number "6"; oId "CUFF.62265.10"; tss\_id "TSS44234";  
 chr22 Cufflinks exon 27114103 27118964 . + . gene\_id "XLOC\_035082"; transcript\_id "TCONS\_00058451";  
 exon\_number "7"; oId "CUFF.62265.10"; tss\_id "TSS44234";  
 chr22 Cufflinks exon 27053446 27053618 . + . gene\_id "XLOC\_035082"; transcript\_id "TCONS\_00058457";  
 exon\_number "1"; oId "CUFF.62265.9"; tss\_id "TSS44234";  
 chr22 Cufflinks exon 27059280 27059362 . + . gene\_id "XLOC\_035082"; transcript\_id "TCONS\_00058457";  
 exon\_number "2"; oId "CUFF.62265.9"; tss\_id "TSS44234";  
 chr22 Cufflinks exon 27061421 27062900 . + . gene\_id "XLOC\_035082"; transcript\_id "TCONS\_00058457";  
 exon\_number "3"; oId "CUFF.62265.9"; tss\_id "TSS44234";  
 chr22 Cufflinks exon 27064121 27068950 . + . gene\_id "XLOC\_035082"; transcript\_id "TCONS\_00058457";  
 exon\_number "4"; oId "CUFF.62265.9"; tss\_id "TSS44234";  
 chr22 Cufflinks exon 27107793 27107971 . + . gene\_id "XLOC\_035082"; transcript\_id "TCONS\_00058457";  
 exon\_number "5"; oId "CUFF.62265.9"; tss\_id "TSS44234";  
 chr22 Cufflinks exon 27113216 27113282 . + . gene\_id "XLOC\_035082"; transcript\_id "TCONS\_00058457";  
 exon\_number "6"; oId "CUFF.62265.9"; tss\_id "TSS44234";  
 chr22 Cufflinks exon 27114103 27114194 . + . gene\_id "XLOC\_035082"; transcript\_id "TCONS\_00058457";  
 exon\_number "7"; oId "CUFF.62265.9"; tss\_id "TSS44234";  
 chr22 Cufflinks exon 27122607 27122757 . + . gene\_id "XLOC\_035082"; transcript\_id "TCONS\_00058457";  
 exon\_number "8"; oId "CUFF.62265.9"; tss\_id "TSS44234";  
 chr22 Cufflinks exon 27170119 27170180 . + . gene\_id "XLOC\_035082"; transcript\_id "TCONS\_00058457";  
 exon\_number "9"; oId "CUFF.62265.9"; tss\_id "TSS44234";  
 chr22 Cufflinks exon 27172790 27172917 . + . gene\_id "XLOC\_035082"; transcript\_id "TCONS\_00058457";  
 exon\_number "10"; oId "CUFF.62265.9"; tss\_id "TSS44234";  
 chr22 Cufflinks exon 27174419 27174548 . + . gene\_id "XLOC\_035082"; transcript\_id "TCONS\_00058457";  
 exon\_number "11"; oId "CUFF.62265.9"; tss\_id "TSS44234";  
 chr22 Cufflinks exon 27175847 27175959 . + . gene\_id "XLOC\_035082"; transcript\_id "TCONS\_00058457";  
 exon\_number "12"; oId "CUFF.62265.9"; tss\_id "TSS44234";  
 chr22 Cufflinks exon 27182670 27184921 . + . gene\_id "XLOC\_035082"; transcript\_id "TCONS\_00058457";  
 exon\_number "13"; oId "CUFF.62265.9"; tss\_id "TSS44234";  
 chr22 Cufflinks exon 27186551 27196379 . + . gene\_id "XLOC\_035082"; transcript\_id "TCONS\_00058457";  
 exon\_number "14"; oId "CUFF.62265.9"; tss\_id "TSS44234";  
 chr22 Cufflinks exon 27197443 27206333 . + . gene\_id "XLOC\_035082"; transcript\_id "TCONS\_00058457";  
 exon\_number "15"; oId "CUFF.62265.9"; tss\_id "TSS44234";  
 chr22 Cufflinks exon 27053446 27053618 . + . gene\_id "XLOC\_035082"; transcript\_id "TCONS\_00058456";  
 exon\_number "1"; oId "CUFF.62265.2"; tss\_id "TSS44234";  
 chr22 Cufflinks exon 27059280 27059362 . + . gene\_id "XLOC\_035082"; transcript\_id "TCONS\_00058456"; exon\_number  
 "2"; oId "CUFF.62265.2"; tss\_id "TSS44234";  
 chr22 Cufflinks exon 27061495 27062900 . + . gene\_id "XLOC\_035082"; transcript\_id "TCONS\_00058456"; exon\_number  
 "3"; oId "CUFF.62265.2"; tss\_id "TSS44234";

|                                              |                |          |          |   |   |   |                                                                    |
|----------------------------------------------|----------------|----------|----------|---|---|---|--------------------------------------------------------------------|
| chr22                                        | Cufflinks exon | 27064121 | 27068950 | . | + | . | gene_id "XLOC_035082"; transcript_id "TCONS_00058456"; exon_number |
| "4"; oId "CUFF.62265.2"; tss_id "TSS44234";  |                |          |          |   |   |   |                                                                    |
| chr22                                        | Cufflinks exon | 27170119 | 27170180 | . | + | . | gene_id "XLOC_035082"; transcript_id "TCONS_00058456"; exon_number |
| "5"; oId "CUFF.62265.2"; tss_id "TSS44234";  |                |          |          |   |   |   |                                                                    |
| chr22                                        | Cufflinks exon | 27172790 | 27172917 | . | + | . | gene_id "XLOC_035082"; transcript_id "TCONS_00058456"; exon_number |
| "6"; oId "CUFF.62265.2"; tss_id "TSS44234";  |                |          |          |   |   |   |                                                                    |
| chr22                                        | Cufflinks exon | 27174419 | 27174548 | . | + | . | gene_id "XLOC_035082"; transcript_id "TCONS_00058456"; exon_number |
| "7"; oId "CUFF.62265.2"; tss_id "TSS44234";  |                |          |          |   |   |   |                                                                    |
| chr22                                        | Cufflinks exon | 27182670 | 27182730 | . | + | . | gene_id "XLOC_035082"; transcript_id "TCONS_00058456"; exon_number |
| "8"; oId "CUFF.62265.2"; tss_id "TSS44234";  |                |          |          |   |   |   |                                                                    |
| chr22                                        | Cufflinks exon | 27184830 | 27184921 | . | + | . | gene_id "XLOC_035082"; transcript_id "TCONS_00058456"; exon_number |
| "9"; oId "CUFF.62265.2"; tss_id "TSS44234";  |                |          |          |   |   |   |                                                                    |
| chr22                                        | Cufflinks exon | 27186551 | 27196009 | . | + | . | gene_id "XLOC_035082"; transcript_id "TCONS_00058456"; exon_number |
| "10"; oId "CUFF.62265.2"; tss_id "TSS44234"; |                |          |          |   |   |   |                                                                    |
| chr22                                        | Cufflinks exon | 27196318 | 27206333 | . | + | . | gene_id "XLOC_035082"; transcript_id "TCONS_00058456"; exon_number |
| "11"; oId "CUFF.62265.2"; tss_id "TSS44234"; |                |          |          |   |   |   |                                                                    |
| chr22                                        | Cufflinks exon | 27053446 | 27053618 | . | + | . | gene_id "XLOC_035082"; transcript_id "TCONS_00058455"; exon_number |
| "1"; oId "CUFF.62265.1"; tss_id "TSS44234";  |                |          |          |   |   |   |                                                                    |
| chr22                                        | Cufflinks exon | 27059280 | 27059362 | . | + | . | gene_id "XLOC_035082"; transcript_id "TCONS_00058455"; exon_number |
| "2"; oId "CUFF.62265.1"; tss_id "TSS44234";  |                |          |          |   |   |   |                                                                    |
| chr22                                        | Cufflinks exon | 27061495 | 27062900 | . | + | . | gene_id "XLOC_035082"; transcript_id "TCONS_00058455"; exon_number |
| "3"; oId "CUFF.62265.1"; tss_id "TSS44234";  |                |          |          |   |   |   |                                                                    |
| chr22                                        | Cufflinks exon | 27064121 | 27068950 | . | + | . | gene_id "XLOC_035082"; transcript_id "TCONS_00058455"; exon_number |
| "4"; oId "CUFF.62265.1"; tss_id "TSS44234";  |                |          |          |   |   |   |                                                                    |
| chr22                                        | Cufflinks exon | 27170119 | 27170180 | . | + | . | gene_id "XLOC_035082"; transcript_id "TCONS_00058455"; exon_number |
| "5"; oId "CUFF.62265.1"; tss_id "TSS44234";  |                |          |          |   |   |   |                                                                    |
| chr22                                        | Cufflinks exon | 27172790 | 27172917 | . | + | . | gene_id "XLOC_035082"; transcript_id "TCONS_00058455"; exon_number |
| "6"; oId "CUFF.62265.1"; tss_id "TSS44234";  |                |          |          |   |   |   |                                                                    |
| chr22                                        | Cufflinks exon | 27174419 | 27174548 | . | + | . | gene_id "XLOC_035082"; transcript_id "TCONS_00058455"; exon_number |
| "7"; oId "CUFF.62265.1"; tss_id "TSS44234";  |                |          |          |   |   |   |                                                                    |
| chr22                                        | Cufflinks exon | 27182670 | 27182730 | . | + | . | gene_id "XLOC_035082"; transcript_id "TCONS_00058455"; exon_number |
| "8"; oId "CUFF.62265.1"; tss_id "TSS44234";  |                |          |          |   |   |   |                                                                    |
| chr22                                        | Cufflinks exon | 27184830 | 27184921 | . | + | . | gene_id "XLOC_035082"; transcript_id "TCONS_00058455"; exon_number |
| "9"; oId "CUFF.62265.1"; tss_id "TSS44234";  |                |          |          |   |   |   |                                                                    |
| chr22                                        | Cufflinks exon | 27186551 | 27206333 | . | + | . | gene_id "XLOC_035082"; transcript_id "TCONS_00058455"; exon_number |
| "10"; oId "CUFF.62265.1"; tss_id "TSS44234"; |                |          |          |   |   |   |                                                                    |
| chr22                                        | Cufflinks exon | 27053446 | 27053618 | . | + | . | gene_id "XLOC_035082"; transcript_id "TCONS_00058458"; exon_number |
| "1"; oId "CUFF.62265.4"; tss_id "TSS44234";  |                |          |          |   |   |   |                                                                    |
| chr22                                        | Cufflinks exon | 27059280 | 27059362 | . | + | . | gene_id "XLOC_035082"; transcript_id "TCONS_00058458"; exon_number |
| "2"; oId "CUFF.62265.4"; tss_id "TSS44234";  |                |          |          |   |   |   |                                                                    |
| chr22                                        | Cufflinks exon | 27061495 | 27062900 | . | + | . | gene_id "XLOC_035082"; transcript_id "TCONS_00058458"; exon_number |
| "3"; oId "CUFF.62265.4"; tss_id "TSS44234";  |                |          |          |   |   |   |                                                                    |
| chr22                                        | Cufflinks exon | 27064121 | 27068950 | . | + | . | gene_id "XLOC_035082"; transcript_id "TCONS_00058458"; exon_number |

|                                                                                       |   |   |   |                                                                    |
|---------------------------------------------------------------------------------------|---|---|---|--------------------------------------------------------------------|
| "4"; oId "CUFF.62265.4"; tss_id "TSS44234";<br>chr22 Cufflinks exon27113216 27113422  | . | + | . | gene_id "XLOC_035082"; transcript_id "TCONS_00058458"; exon_number |
| "5"; oId "CUFF.62265.4"; tss_id "TSS44234";<br>chr22 Cufflinks exon27114103 27114194  | . | + | . | gene_id "XLOC_035082"; transcript_id "TCONS_00058458"; exon_number |
| "6"; oId "CUFF.62265.4"; tss_id "TSS44234";<br>chr22 Cufflinks exon27115996 27116439  | . | + | . | gene_id "XLOC_035082"; transcript_id "TCONS_00058458"; exon_number |
| "7"; oId "CUFF.62265.4"; tss_id "TSS44234";<br>chr22 Cufflinks exon27116464 27116519  | . | + | . | gene_id "XLOC_035082"; transcript_id "TCONS_00058458"; exon_number |
| "8"; oId "CUFF.62265.4"; tss_id "TSS44234";<br>chr22 Cufflinks exon27187997 27196379  | . | + | . | gene_id "XLOC_035082"; transcript_id "TCONS_00058458"; exon_number |
| "9"; oId "CUFF.62265.4"; tss_id "TSS44234";<br>chr22 Cufflinks exon27197443 27197602  | . | + | . | gene_id "XLOC_035082"; transcript_id "TCONS_00058458"; exon_number |
| "10"; oId "CUFF.62265.4"; tss_id "TSS44234";<br>chr22 Cufflinks exon27197686 27197754 | . | + | . | gene_id "XLOC_035082"; transcript_id "TCONS_00058458"; exon_number |
| "11"; oId "CUFF.62265.4"; tss_id "TSS44234";<br>chr22 Cufflinks exon27247872 27248078 | . | + | . | gene_id "XLOC_035082"; transcript_id "TCONS_00058458"; exon_number |
| "12"; oId "CUFF.62265.4"; tss_id "TSS44234";<br>chr22 Cufflinks exon27248296 27256593 | . | + | . | gene_id "XLOC_035082"; transcript_id "TCONS_00058458"; exon_number |
| "13"; oId "CUFF.62265.4"; tss_id "TSS44234";<br>chr22 Cufflinks exon27059424 27059473 | . | + | . | gene_id "XLOC_035082"; transcript_id "TCONS_00058459"; exon_number |
| "1"; oId "CUFF.62265.11"; tss_id "TSS44235";<br>chr22 Cufflinks exon27061495 27062900 | . | + | . | gene_id "XLOC_035082"; transcript_id "TCONS_00058459"; exon_number |
| "2"; oId "CUFF.62265.11"; tss_id "TSS44235";<br>chr22 Cufflinks exon27064121 27072440 | . | + | . | gene_id "XLOC_035082"; transcript_id "TCONS_00058459"; exon_number |
| "3"; oId "CUFF.62265.11"; tss_id "TSS44235";<br>chr22 Cufflinks exon27159958 27160356 | . | + | . | gene_id "XLOC_035082"; transcript_id "TCONS_00058470"; exon_number |
| "1"; oId "CUFF.62265.15"; tss_id "TSS44236";<br>chr22 Cufflinks exon27170119 27170180 | . | + | . | gene_id "XLOC_035082"; transcript_id "TCONS_00058470"; exon_number |
| "2"; oId "CUFF.62265.15"; tss_id "TSS44236";<br>chr22 Cufflinks exon27172790 27172917 | . | + | . | gene_id "XLOC_035082"; transcript_id "TCONS_00058470"; exon_number |
| "3"; oId "CUFF.62265.15"; tss_id "TSS44236";<br>chr22 Cufflinks exon27174419 27174548 | . | + | . | gene_id "XLOC_035082"; transcript_id "TCONS_00058470"; exon_number |
| "4"; oId "CUFF.62265.15"; tss_id "TSS44236";<br>chr22 Cufflinks exon27175847 27184921 | . | + | . | gene_id "XLOC_035082"; transcript_id "TCONS_00058470"; exon_number |
| "5"; oId "CUFF.62265.15"; tss_id "TSS44236";<br>chr22 Cufflinks exon27186551 27206333 | . | + | . | gene_id "XLOC_035082"; transcript_id "TCONS_00058470"; exon_number |
| "6"; oId "CUFF.62265.15"; tss_id "TSS44236";<br>chr22 Cufflinks exon27179533 27179580 | . | + | . | gene_id "XLOC_035082"; transcript_id "TCONS_00058472"; exon_number |
| "1"; oId "CUFF.62265.16"; tss_id "TSS44237";<br>chr22 Cufflinks exon27179860 27180970 | . | + | . | gene_id "XLOC_035082"; transcript_id "TCONS_00058472"; exon_number |
| "2"; oId "CUFF.62265.16"; tss_id "TSS44237";<br>chr22 Cufflinks exon27181122 27184921 | . | + | . | gene_id "XLOC_035082"; transcript_id "TCONS_00058473"; exon_number |
| "1"; oId "CUFF.62265.17"; tss_id "TSS44238";                                          | . | + | . |                                                                    |

|       |                                              |          |          |   |   |   |                                                                    |
|-------|----------------------------------------------|----------|----------|---|---|---|--------------------------------------------------------------------|
| chr22 | Cufflinks exon                               | 27186551 | 27186671 | . | + | . | gene_id "XLOC_035082"; transcript_id "TCONS_00058473"; exon_number |
|       | "2"; oId "CUFF.62265.17"; tss_id "TSS44238"; |          |          |   |   |   |                                                                    |
| chr22 | Cufflinks exon                               | 27191114 | 27196379 | . | + | . | gene_id "XLOC_035082"; transcript_id "TCONS_00058473"; exon_number |
|       | "3"; oId "CUFF.62265.17"; tss_id "TSS44238"; |          |          |   |   |   |                                                                    |
| chr22 | Cufflinks exon                               | 27197443 | 27206333 | . | + | . | gene_id "XLOC_035082"; transcript_id "TCONS_00058473"; exon_number |
|       | "4"; oId "CUFF.62265.17"; tss_id "TSS44238"; |          |          |   |   |   |                                                                    |
| chr22 | Cufflinks exon                               | 27186654 | 27186671 | . | + | . | gene_id "XLOC_035082"; transcript_id "TCONS_00058474"; exon_number |
|       | "1"; oId "CUFF.62265.19"; tss_id "TSS44239"; |          |          |   |   |   |                                                                    |
| chr22 | Cufflinks exon                               | 27247872 | 27248078 | . | + | . | gene_id "XLOC_035082"; transcript_id "TCONS_00058474"; exon_number |
|       | "2"; oId "CUFF.62265.19"; tss_id "TSS44239"; |          |          |   |   |   |                                                                    |
| chr22 | Cufflinks exon                               | 27256647 | 27256726 | . | + | . | gene_id "XLOC_035082"; transcript_id "TCONS_00058474"; exon_number |
|       | "3"; oId "CUFF.62265.19"; tss_id "TSS44239"; |          |          |   |   |   |                                                                    |
| chr22 | Cufflinks exon                               | 27257945 | 27258068 | . | + | . | gene_id "XLOC_035082"; transcript_id "TCONS_00058474"; exon_number |
|       | "4"; oId "CUFF.62265.19"; tss_id "TSS44239"; |          |          |   |   |   |                                                                    |
| chr22 | Cufflinks exon                               | 27462032 | 27462229 | . | + | . | gene_id "XLOC_035082"; transcript_id "TCONS_00058474"; exon_number |
|       | "5"; oId "CUFF.62265.19"; tss_id "TSS44239"; |          |          |   |   |   |                                                                    |
| chr22 | Cufflinks exon                               | 27130131 | 27130466 | . | + | . | gene_id "XLOC_035085"; transcript_id "TCONS_00058462"; exon_number |
|       | "1"; oId "CUFF.62272.2"; tss_id "TSS44243";  |          |          |   |   |   |                                                                    |
| chr22 | Cufflinks exon                               | 27134025 | 27134428 | . | + | . | gene_id "XLOC_035085"; transcript_id "TCONS_00058462"; exon_number |
|       | "2"; oId "CUFF.62272.2"; tss_id "TSS44243";  |          |          |   |   |   |                                                                    |
| chr22 | Cufflinks exon                               | 28315364 | 28315533 | . | + | . | gene_id "XLOC_035108"; transcript_id "TCONS_00058491"; exon_number |
|       | "1"; oId "CUFF.62345.2"; tss_id "TSS44267";  |          |          |   |   |   |                                                                    |
| chr22 | Cufflinks exon                               | 28318006 | 28318987 | . | + | . | gene_id "XLOC_035108"; transcript_id "TCONS_00058491"; exon_number |
|       | "2"; oId "CUFF.62345.2"; tss_id "TSS44267";  |          |          |   |   |   |                                                                    |
| chr22 | Cufflinks exon                               | 28315364 | 28315533 | . | + | . | gene_id "XLOC_035108"; transcript_id "TCONS_00058492"; exon_number |
|       | "1"; oId "CUFF.62345.4"; tss_id "TSS44267";  |          |          |   |   |   |                                                                    |
| chr22 | Cufflinks exon                               | 28318006 | 28318166 | . | + | . | gene_id "XLOC_035108"; transcript_id "TCONS_00058492"; exon_number |
|       | "2"; oId "CUFF.62345.4"; tss_id "TSS44267";  |          |          |   |   |   |                                                                    |
| chr22 | Cufflinks exon                               | 28381680 | 28382380 | . | + | . | gene_id "XLOC_035108"; transcript_id "TCONS_00058492"; exon_number |
|       | "3"; oId "CUFF.62345.4"; tss_id "TSS44267";  |          |          |   |   |   |                                                                    |
| chr22 | Cufflinks exon                               | 28315364 | 28315533 | . | + | . | gene_id "XLOC_035108"; transcript_id "TCONS_00058493"; exon_number |
|       | "1"; oId "CUFF.62345.3"; tss_id "TSS44267";  |          |          |   |   |   |                                                                    |
| chr22 | Cufflinks exon                               | 28331139 | 28331218 | . | + | . | gene_id "XLOC_035108"; transcript_id "TCONS_00058493"; exon_number |
|       | "2"; oId "CUFF.62345.3"; tss_id "TSS44267";  |          |          |   |   |   |                                                                    |
| chr22 | Cufflinks exon                               | 28390461 | 28390641 | . | + | . | gene_id "XLOC_035108"; transcript_id "TCONS_00058493"; exon_number |
|       | "3"; oId "CUFF.62345.3"; tss_id "TSS44267";  |          |          |   |   |   |                                                                    |
| chr22 | Cufflinks exon                               | 28393399 | 28394826 | . | + | . | gene_id "XLOC_035108"; transcript_id "TCONS_00058493"; exon_number |
|       | "4"; oId "CUFF.62345.3"; tss_id "TSS44267";  |          |          |   |   |   |                                                                    |
| chr22 | Cufflinks exon                               | 28395418 | 28398679 | . | + | . | gene_id "XLOC_035108"; transcript_id "TCONS_00058493"; exon_number |
|       | "5"; oId "CUFF.62345.3"; tss_id "TSS44267";  |          |          |   |   |   |                                                                    |
| chr22 | Cufflinks exon                               | 28315553 | 28315954 | . | + | . | gene_id "XLOC_035108"; transcript_id "TCONS_00058494"; exon_number |
|       | "1"; oId "CUFF.62345.5"; tss_id "TSS44268";  |          |          |   |   |   |                                                                    |
| chr22 | Cufflinks exon                               | 28318006 | 28318166 | . | + | . | gene_id "XLOC_035108"; transcript_id "TCONS_00058494"; exon_number |

|                                             |   |   |   |                                                                    |  |
|---------------------------------------------|---|---|---|--------------------------------------------------------------------|--|
| "2"; oId "CUFF.62345.5"; tss_id "TSS44268"; |   |   |   |                                                                    |  |
| chr22 Cufflinks exon28331139 28331218       | . | + | . | gene_id "XLOC_035108"; transcript_id "TCONS_00058494"; exon_number |  |
| "3"; oId "CUFF.62345.5"; tss_id "TSS44268"; |   |   |   |                                                                    |  |
| chr22 Cufflinks exon28390461 28390641       | . | + | . | gene_id "XLOC_035108"; transcript_id "TCONS_00058494"; exon_number |  |
| "4"; oId "CUFF.62345.5"; tss_id "TSS44268"; |   |   |   |                                                                    |  |
| chr22 Cufflinks exon28393399 28394826       | . | + | . | gene_id "XLOC_035108"; transcript_id "TCONS_00058494"; exon_number |  |
| "5"; oId "CUFF.62345.5"; tss_id "TSS44268"; |   |   |   |                                                                    |  |
| chr22 Cufflinks exon28395418 28398679       | . | + | . | gene_id "XLOC_035108"; transcript_id "TCONS_00058494"; exon_number |  |
| "6"; oId "CUFF.62345.5"; tss_id "TSS44268"; |   |   |   |                                                                    |  |
| chr22 Cufflinks exon29196662 29196725       | . | + | . | gene_id "XLOC_035111"; transcript_id "TCONS_00058502"; exon_number |  |
| "1"; oId "CUFF.62371.1"; tss_id "TSS44273"; |   |   |   |                                                                    |  |
| chr22 Cufflinks exon29217960 29218167       | . | + | . | gene_id "XLOC_035111"; transcript_id "TCONS_00058502"; exon_number |  |
| "2"; oId "CUFF.62371.1"; tss_id "TSS44273"; |   |   |   |                                                                    |  |
| chr22 Cufflinks exon29240115 29240187       | . | + | . | gene_id "XLOC_035111"; transcript_id "TCONS_00058502"; exon_number |  |
| "3"; oId "CUFF.62371.1"; tss_id "TSS44273"; |   |   |   |                                                                    |  |
| chr22 Cufflinks exon29242306 29242502       | . | + | . | gene_id "XLOC_035111"; transcript_id "TCONS_00058502"; exon_number |  |
| "4"; oId "CUFF.62371.1"; tss_id "TSS44273"; |   |   |   |                                                                    |  |
| chr22 Cufflinks exon29244381 29244459       | . | + | . | gene_id "XLOC_035111"; transcript_id "TCONS_00058502"; exon_number |  |
| "5"; oId "CUFF.62371.1"; tss_id "TSS44273"; |   |   |   |                                                                    |  |
| chr22 Cufflinks exon29246235 29246561       | . | + | . | gene_id "XLOC_035111"; transcript_id "TCONS_00058502"; exon_number |  |
| "6"; oId "CUFF.62371.1"; tss_id "TSS44273"; |   |   |   |                                                                    |  |
| chr22 Cufflinks exon29196668 29196725       | . | + | . | gene_id "XLOC_035111"; transcript_id "TCONS_00058503"; exon_number |  |
| "1"; oId "CUFF.62371.3"; tss_id "TSS44273"; |   |   |   |                                                                    |  |
| chr22 Cufflinks exon29217960 29218167       | . | + | . | gene_id "XLOC_035111"; transcript_id "TCONS_00058503"; exon_number |  |
| "2"; oId "CUFF.62371.3"; tss_id "TSS44273"; |   |   |   |                                                                    |  |
| chr22 Cufflinks exon29234848 29234861       | . | + | . | gene_id "XLOC_035111"; transcript_id "TCONS_00058503"; exon_number |  |
| "3"; oId "CUFF.62371.3"; tss_id "TSS44273"; |   |   |   |                                                                    |  |
| chr22 Cufflinks exon30827971 30828376       | . | + | . | gene_id "XLOC_035140"; transcript_id "TCONS_00058553"; exon_number |  |
| "1"; oId "CUFF.62506.5"; tss_id "TSS44310"; |   |   |   |                                                                    |  |
| chr22 Cufflinks exon30829604 30829660       | . | + | . | gene_id "XLOC_035140"; transcript_id "TCONS_00058553"; exon_number |  |
| "2"; oId "CUFF.62506.5"; tss_id "TSS44310"; |   |   |   |                                                                    |  |
| chr22 Cufflinks exon30827971 30829204       | . | + | . | gene_id "XLOC_035140"; transcript_id "TCONS_00058557"; exon_number |  |
| "1"; oId "CUFF.62506.4"; tss_id "TSS44310"; |   |   |   |                                                                    |  |
| chr22 Cufflinks exon30829604 30829882       | . | + | . | gene_id "XLOC_035140"; transcript_id "TCONS_00058557"; exon_number |  |
| "2"; oId "CUFF.62506.4"; tss_id "TSS44310"; |   |   |   |                                                                    |  |
| chr22 Cufflinks exon30830279 30830372       | . | + | . | gene_id "XLOC_035140"; transcript_id "TCONS_00058557"; exon_number |  |
| "3"; oId "CUFF.62506.4"; tss_id "TSS44310"; |   |   |   |                                                                    |  |
| chr22 Cufflinks exon30831008 30832278       | . | + | . | gene_id "XLOC_035140"; transcript_id "TCONS_00058557"; exon_number |  |
| "4"; oId "CUFF.62506.4"; tss_id "TSS44310"; |   |   |   |                                                                    |  |
| chr22 Cufflinks exon30827971 30829204       | . | + | . | gene_id "XLOC_035140"; transcript_id "TCONS_00058556"; exon_number |  |
| "1"; oId "CUFF.62506.3"; tss_id "TSS44310"; |   |   |   |                                                                    |  |
| chr22 Cufflinks exon30829604 30829882       | . | + | . | gene_id "XLOC_035140"; transcript_id "TCONS_00058556"; exon_number |  |
| "2"; oId "CUFF.62506.3"; tss_id "TSS44310"; |   |   |   |                                                                    |  |

|       |                |          |          |   |   |   |                                                                                                                |
|-------|----------------|----------|----------|---|---|---|----------------------------------------------------------------------------------------------------------------|
| chr22 | Cufflinks exon | 30830213 | 30830278 | . | + | . | gene_id "XLOC_035140"; transcript_id "TCONS_00058556"; exon_number "3"; oId "CUFF.62506.3"; tss_id "TSS44310"; |
| chr22 | Cufflinks exon | 30831008 | 30832278 | . | + | . | gene_id "XLOC_035140"; transcript_id "TCONS_00058556"; exon_number "4"; oId "CUFF.62506.3"; tss_id "TSS44310"; |
| chr22 | Cufflinks exon | 30827971 | 30829204 | . | + | . | gene_id "XLOC_035140"; transcript_id "TCONS_00058555"; exon_number "1"; oId "CUFF.62506.2"; tss_id "TSS44310"; |
| chr22 | Cufflinks exon | 30829604 | 30829712 | . | + | . | gene_id "XLOC_035140"; transcript_id "TCONS_00058555"; exon_number "2"; oId "CUFF.62506.2"; tss_id "TSS44310"; |
| chr22 | Cufflinks exon | 30830279 | 30830372 | . | + | . | gene_id "XLOC_035140"; transcript_id "TCONS_00058555"; exon_number "3"; oId "CUFF.62506.2"; tss_id "TSS44310"; |
| chr22 | Cufflinks exon | 30831008 | 30832278 | . | + | . | gene_id "XLOC_035140"; transcript_id "TCONS_00058555"; exon_number "4"; oId "CUFF.62506.2"; tss_id "TSS44310"; |
| chr22 | Cufflinks exon | 30827971 | 30829204 | . | + | . | gene_id "XLOC_035140"; transcript_id "TCONS_00058554"; exon_number "1"; oId "CUFF.62506.1"; tss_id "TSS44310"; |
| chr22 | Cufflinks exon | 30829604 | 30829882 | . | + | . | gene_id "XLOC_035140"; transcript_id "TCONS_00058554"; exon_number "2"; oId "CUFF.62506.1"; tss_id "TSS44310"; |
| chr22 | Cufflinks exon | 30831008 | 30832278 | . | + | . | gene_id "XLOC_035140"; transcript_id "TCONS_00058554"; exon_number "3"; oId "CUFF.62506.1"; tss_id "TSS44310"; |
| chr22 | Cufflinks exon | 30828504 | 30829204 | . | + | . | gene_id "XLOC_035140"; transcript_id "TCONS_00058558"; exon_number "1"; oId "CUFF.62506.6"; tss_id "TSS44311"; |
| chr22 | Cufflinks exon | 30829604 | 30829882 | . | + | . | gene_id "XLOC_035140"; transcript_id "TCONS_00058558"; exon_number "2"; oId "CUFF.62506.6"; tss_id "TSS44311"; |
| chr22 | Cufflinks exon | 30830213 | 30830372 | . | + | . | gene_id "XLOC_035140"; transcript_id "TCONS_00058558"; exon_number "3"; oId "CUFF.62506.6"; tss_id "TSS44311"; |
| chr22 | Cufflinks exon | 30831008 | 30832278 | . | + | . | gene_id "XLOC_035140"; transcript_id "TCONS_00058558"; exon_number "4"; oId "CUFF.62506.6"; tss_id "TSS44311"; |
| chr22 | Cufflinks exon | 31365176 | 31367765 | . | + | . | gene_id "XLOC_035148"; transcript_id "TCONS_00058572"; exon_number "1"; oId "CUFF.62539.1"; tss_id "TSS44323"; |
| chr22 | Cufflinks exon | 31368910 | 31369573 | . | + | . | gene_id "XLOC_035148"; transcript_id "TCONS_00058572"; exon_number "2"; oId "CUFF.62539.1"; tss_id "TSS44323"; |
| chr22 | Cufflinks exon | 31371156 | 31375381 | . | + | . | gene_id "XLOC_035148"; transcript_id "TCONS_00058572"; exon_number "3"; oId "CUFF.62539.1"; tss_id "TSS44323"; |
| chr22 | Cufflinks exon | 31365190 | 31376823 | . | + | . | gene_id "XLOC_035148"; transcript_id "TCONS_00058573"; exon_number "1"; oId "CUFF.62539.2"; tss_id "TSS44323"; |
| chr22 | Cufflinks exon | 31376993 | 31377129 | . | + | . | gene_id "XLOC_035148"; transcript_id "TCONS_00058573"; exon_number "2"; oId "CUFF.62539.2"; tss_id "TSS44323"; |
| chr22 | Cufflinks exon | 31365191 | 31369587 | . | + | . | gene_id "XLOC_035148"; transcript_id "TCONS_00058575"; exon_number "1"; oId "CUFF.62539.4"; tss_id "TSS44323"; |
| chr22 | Cufflinks exon | 31371156 | 31375381 | . | + | . | gene_id "XLOC_035148"; transcript_id "TCONS_00058575"; exon_number "2"; oId "CUFF.62539.4"; tss_id "TSS44323"; |
| chr22 | Cufflinks exon | 31365191 | 31367765 | . | + | . | gene_id "XLOC_035148"; transcript_id "TCONS_00058574"; exon_number "1"; oId "CUFF.62539.3"; tss_id "TSS44323"; |
| chr22 | Cufflinks exon | 31368910 | 31375381 | . | + | . | gene_id "XLOC_035148"; transcript_id "TCONS_00058574"; exon_number "1"; oId "CUFF.62539.3"; tss_id "TSS44323"; |

|                                             |   |   |   |                                                                    |  |
|---------------------------------------------|---|---|---|--------------------------------------------------------------------|--|
| "2"; oId "CUFF.62539.3"; tss_id "TSS44323"; |   |   |   |                                                                    |  |
| chr22 Cufflinks exon31365197 31367765       | . | + | . | gene_id "XLOC_035148"; transcript_id "TCONS_00058577"; exon_number |  |
| "1"; oId "CUFF.62539.6"; tss_id "TSS44323"; |   |   |   |                                                                    |  |
| chr22 Cufflinks exon31368841 31369573       | . | + | . | gene_id "XLOC_035148"; transcript_id "TCONS_00058577"; exon_number |  |
| "2"; oId "CUFF.62539.6"; tss_id "TSS44323"; |   |   |   |                                                                    |  |
| chr22 Cufflinks exon31371156 31375381       | . | + | . | gene_id "XLOC_035148"; transcript_id "TCONS_00058577"; exon_number |  |
| "3"; oId "CUFF.62539.6"; tss_id "TSS44323"; |   |   |   |                                                                    |  |
| chr22 Cufflinks exon31365197 31367765       | . | + | . | gene_id "XLOC_035148"; transcript_id "TCONS_00058576"; exon_number |  |
| "1"; oId "CUFF.62539.5"; tss_id "TSS44323"; |   |   |   |                                                                    |  |
| chr22 Cufflinks exon31368841 31369587       | . | + | . | gene_id "XLOC_035148"; transcript_id "TCONS_00058576"; exon_number |  |
| "2"; oId "CUFF.62539.5"; tss_id "TSS44323"; |   |   |   |                                                                    |  |
| chr22 Cufflinks exon31371156 31375381       | . | + | . | gene_id "XLOC_035148"; transcript_id "TCONS_00058576"; exon_number |  |
| "3"; oId "CUFF.62539.5"; tss_id "TSS44323"; |   |   |   |                                                                    |  |
| chr22 Cufflinks exon32601030 32601235       | . | + | . | gene_id "XLOC_035168"; transcript_id "TCONS_00058611"; exon_number |  |
| "1"; oId "CUFF.62602.1"; tss_id "TSS44346"; |   |   |   |                                                                    |  |
| chr22 Cufflinks exon32603123 32603263       | . | + | . | gene_id "XLOC_035168"; transcript_id "TCONS_00058611"; exon_number |  |
| "2"; oId "CUFF.62602.1"; tss_id "TSS44346"; |   |   |   |                                                                    |  |
| chr22 Cufflinks exon32661418 32661537       | . | + | . | gene_id "XLOC_035168"; transcript_id "TCONS_00058611"; exon_number |  |
| "3"; oId "CUFF.62602.1"; tss_id "TSS44346"; |   |   |   |                                                                    |  |
| chr22 Cufflinks exon32664275 32664566       | . | + | . | gene_id "XLOC_035168"; transcript_id "TCONS_00058611"; exon_number |  |
| "4"; oId "CUFF.62602.1"; tss_id "TSS44346"; |   |   |   |                                                                    |  |
| chr22 Cufflinks exon32665344 32669494       | . | + | . | gene_id "XLOC_035168"; transcript_id "TCONS_00058611"; exon_number |  |
| "5"; oId "CUFF.62602.1"; tss_id "TSS44346"; |   |   |   |                                                                    |  |
| chr22 Cufflinks exon32672672 32672960       | . | + | . | gene_id "XLOC_035168"; transcript_id "TCONS_00058611"; exon_number |  |
| "6"; oId "CUFF.62602.1"; tss_id "TSS44346"; |   |   |   |                                                                    |  |
| chr22 Cufflinks exon32601030 32601234       | . | + | . | gene_id "XLOC_035168"; transcript_id "TCONS_00058612"; exon_number |  |
| "1"; oId "CUFF.62602.2"; tss_id "TSS44346"; |   |   |   |                                                                    |  |
| chr22 Cufflinks exon32603123 32603263       | . | + | . | gene_id "XLOC_035168"; transcript_id "TCONS_00058612"; exon_number |  |
| "2"; oId "CUFF.62602.2"; tss_id "TSS44346"; |   |   |   |                                                                    |  |
| chr22 Cufflinks exon32664275 32664566       | . | + | . | gene_id "XLOC_035168"; transcript_id "TCONS_00058612"; exon_number |  |
| "3"; oId "CUFF.62602.2"; tss_id "TSS44346"; |   |   |   |                                                                    |  |
| chr22 Cufflinks exon32665344 32669494       | . | + | . | gene_id "XLOC_035168"; transcript_id "TCONS_00058612"; exon_number |  |
| "4"; oId "CUFF.62602.2"; tss_id "TSS44346"; |   |   |   |                                                                    |  |
| chr22 Cufflinks exon32672672 32672788       | . | + | . | gene_id "XLOC_035168"; transcript_id "TCONS_00058612"; exon_number |  |
| "5"; oId "CUFF.62602.2"; tss_id "TSS44346"; |   |   |   |                                                                    |  |
| chr22 Cufflinks exon32674377 32674801       | . | + | . | gene_id "XLOC_035168"; transcript_id "TCONS_00058612"; exon_number |  |
| "6"; oId "CUFF.62602.2"; tss_id "TSS44346"; |   |   |   |                                                                    |  |
| chr22 Cufflinks exon32664175 32664567       | . | + | . | gene_id "XLOC_035168"; transcript_id "TCONS_00058613"; exon_number |  |
| "1"; oId "CUFF.62602.3"; tss_id "TSS44347"; |   |   |   |                                                                    |  |
| chr22 Cufflinks exon32665345 32669518       | . | + | . | gene_id "XLOC_035168"; transcript_id "TCONS_00058613"; exon_number |  |
| "2"; oId "CUFF.62602.3"; tss_id "TSS44347"; |   |   |   |                                                                    |  |
| chr22 Cufflinks exon35848558 35850115       | . | + | . | gene_id "XLOC_035185"; transcript_id "TCONS_00058637"; exon_number |  |
| "1"; oId "CUFF.62748.3"; tss_id "TSS44369"; |   |   |   |                                                                    |  |



|       |                        |          |   |   |   |                                                                                                                |
|-------|------------------------|----------|---|---|---|----------------------------------------------------------------------------------------------------------------|
| chr22 | Cufflinks exon35853055 | 35854365 | . | + | . | gene_id "XLOC_035185"; transcript_id "TCONS_00058637"; exon_number "2"; oId "CUFF.62748.3"; tss_id "TSS44369"; |
| chr22 | Cufflinks exon38472223 | 38474740 | . | + | . | gene_id "XLOC_035251"; transcript_id "TCONS_00058740"; exon_number "1"; oId "CUFF.62937.1"; tss_id "TSS44445"; |
| chr22 | Cufflinks exon38474861 | 38474954 | . | + | . | gene_id "XLOC_035251"; transcript_id "TCONS_00058740"; exon_number "2"; oId "CUFF.62937.1"; tss_id "TSS44445"; |
| chr22 | Cufflinks exon38475622 | 38478362 | . | + | . | gene_id "XLOC_035251"; transcript_id "TCONS_00058740"; exon_number "3"; oId "CUFF.62937.1"; tss_id "TSS44445"; |
| chr22 | Cufflinks exon38479073 | 38479195 | . | + | . | gene_id "XLOC_035251"; transcript_id "TCONS_00058740"; exon_number "4"; oId "CUFF.62937.1"; tss_id "TSS44445"; |
| chr22 | Cufflinks exon38481123 | 38481305 | . | + | . | gene_id "XLOC_035251"; transcript_id "TCONS_00058740"; exon_number "5"; oId "CUFF.62937.1"; tss_id "TSS44445"; |
| chr22 | Cufflinks exon38477116 | 38478362 | . | + | . | gene_id "XLOC_035251"; transcript_id "TCONS_00058742"; exon_number "1"; oId "CUFF.62937.3"; tss_id "TSS44446"; |
| chr22 | Cufflinks exon38479073 | 38479195 | . | + | . | gene_id "XLOC_035251"; transcript_id "TCONS_00058742"; exon_number "2"; oId "CUFF.62937.3"; tss_id "TSS44446"; |
| chr22 | Cufflinks exon38481547 | 38481712 | . | + | . | gene_id "XLOC_035251"; transcript_id "TCONS_00058742"; exon_number "3"; oId "CUFF.62937.3"; tss_id "TSS44446"; |
| chr22 | Cufflinks exon38483472 | 38483622 | . | + | . | gene_id "XLOC_035251"; transcript_id "TCONS_00058742"; exon_number "4"; oId "CUFF.62937.3"; tss_id "TSS44446"; |
| chr22 | Cufflinks exon38484190 | 38485166 | . | + | . | gene_id "XLOC_035251"; transcript_id "TCONS_00058742"; exon_number "5"; oId "CUFF.62937.3"; tss_id "TSS44446"; |
| chr22 | Cufflinks exon38477116 | 38478362 | . | + | . | gene_id "XLOC_035251"; transcript_id "TCONS_00058743"; exon_number "1"; oId "CUFF.62937.4"; tss_id "TSS44446"; |
| chr22 | Cufflinks exon38479073 | 38479195 | . | + | . | gene_id "XLOC_035251"; transcript_id "TCONS_00058743"; exon_number "2"; oId "CUFF.62937.4"; tss_id "TSS44446"; |
| chr22 | Cufflinks exon38481541 | 38481711 | . | + | . | gene_id "XLOC_035251"; transcript_id "TCONS_00058743"; exon_number "3"; oId "CUFF.62937.4"; tss_id "TSS44446"; |
| chr22 | Cufflinks exon38483472 | 38483542 | . | + | . | gene_id "XLOC_035251"; transcript_id "TCONS_00058743"; exon_number "4"; oId "CUFF.62937.4"; tss_id "TSS44446"; |
| chr22 | Cufflinks exon38484190 | 38484355 | . | + | . | gene_id "XLOC_035251"; transcript_id "TCONS_00058743"; exon_number "5"; oId "CUFF.62937.4"; tss_id "TSS44446"; |
| chr22 | Cufflinks exon38485652 | 38488936 | . | + | . | gene_id "XLOC_035251"; transcript_id "TCONS_00058743"; exon_number "6"; oId "CUFF.62937.4"; tss_id "TSS44446"; |
| chr22 | Cufflinks exon39486697 | 39486726 | . | + | . | gene_id "XLOC_035269"; transcript_id "TCONS_00058771"; exon_number "1"; oId "CUFF.63061.1"; tss_id "TSS44469"; |
| chr22 | Cufflinks exon39487530 | 39487801 | . | + | . | gene_id "XLOC_035269"; transcript_id "TCONS_00058771"; exon_number "2"; oId "CUFF.63061.1"; tss_id "TSS44469"; |
| chr22 | Cufflinks exon39488013 | 39488860 | . | + | . | gene_id "XLOC_035269"; transcript_id "TCONS_00058771"; exon_number "3"; oId "CUFF.63061.1"; tss_id "TSS44469"; |
| chr22 | Cufflinks exon39486698 | 39487801 | . | + | . | gene_id "XLOC_035269"; transcript_id "TCONS_00058773"; exon_number "1"; oId "CUFF.63061.3"; tss_id "TSS44469"; |
| chr22 | Cufflinks exon39488013 | 39488115 | . | + | . | gene_id "XLOC_035269"; transcript_id "TCONS_00058773"; exon_number "2"; oId "CUFF.63061.3"; tss_id "TSS44469"; |

"2"; oId "CUFF.63061.3"; tss\_id "TSS44469";  
chr22 Cufflinks exon39488535 39488860 . + . gene\_id "XLOC\_035269"; transcript\_id "TCONS\_00058773"; exon\_number  
"3"; oId "CUFF.63061.3"; tss\_id "TSS44469";  
chr22 Cufflinks exon39486698 39487801 . + . gene\_id "XLOC\_035269"; transcript\_id "TCONS\_00058772"; exon\_number  
"1"; oId "CUFF.63061.2"; tss\_id "TSS44469";  
chr22 Cufflinks exon39488013 39488860 . + . gene\_id "XLOC\_035269"; transcript\_id "TCONS\_00058772"; exon\_number  
"2"; oId "CUFF.63061.2"; tss\_id "TSS44469";  
chr22 Cufflinks exon39486733 39487125 . + . gene\_id "XLOC\_035269"; transcript\_id "TCONS\_00058774"; exon\_number  
"1"; oId "CUFF.63061.4"; tss\_id "TSS44469";  
chr22 Cufflinks exon39487530 39487801 . + . gene\_id "XLOC\_035269"; transcript\_id "TCONS\_00058774"; exon\_number  
"2"; oId "CUFF.63061.4"; tss\_id "TSS44469";  
chr22 Cufflinks exon39488013 39488115 . + . gene\_id "XLOC\_035269"; transcript\_id "TCONS\_00058774"; exon\_number  
"3"; oId "CUFF.63061.4"; tss\_id "TSS44469";  
chr22 Cufflinks exon39488535 39488860 . + . gene\_id "XLOC\_035269"; transcript\_id "TCONS\_00058774"; exon\_number  
"4"; oId "CUFF.63061.4"; tss\_id "TSS44469";  
chr22 Cufflinks exon41809636 41810515 . + . gene\_id "XLOC\_035310"; transcript\_id "TCONS\_00058847"; exon\_number  
"1"; oId "CUFF.63203.1"; tss\_id "TSS44524";  
chr22 Cufflinks exon41811102 41812420 . + . gene\_id "XLOC\_035310"; transcript\_id "TCONS\_00058847"; exon\_number  
"2"; oId "CUFF.63203.1"; tss\_id "TSS44524";  
chr22 Cufflinks exon42061733 42061773 . + . gene\_id "XLOC\_035310"; transcript\_id "TCONS\_00058847"; exon\_number  
"3"; oId "CUFF.63203.1"; tss\_id "TSS44524";  
chr22 Cufflinks exon41809954 41810515 . + . gene\_id "XLOC\_035310"; transcript\_id "TCONS\_00058848"; exon\_number  
"1"; oId "CUFF.63203.3"; tss\_id "TSS44525";  
chr22 Cufflinks exon41818984 41819101 . + . gene\_id "XLOC\_035310"; transcript\_id "TCONS\_00058848"; exon\_number  
"2"; oId "CUFF.63203.3"; tss\_id "TSS44525";  
chr22 Cufflinks exon41827129 41828549 . + . gene\_id "XLOC\_035310"; transcript\_id "TCONS\_00058848"; exon\_number  
"3"; oId "CUFF.63203.3"; tss\_id "TSS44525";  
chr22 Cufflinks exon41810156 41810515 . + . gene\_id "XLOC\_035310"; transcript\_id "TCONS\_00058849"; exon\_number  
"1"; oId "CUFF.63203.5"; tss\_id "TSS44526";  
chr22 Cufflinks exon41818984 41819101 . + . gene\_id "XLOC\_035310"; transcript\_id "TCONS\_00058849"; exon\_number  
"2"; oId "CUFF.63203.5"; tss\_id "TSS44526";  
chr22 Cufflinks exon41827181 41828549 . + . gene\_id "XLOC\_035310"; transcript\_id "TCONS\_00058849"; exon\_number  
"3"; oId "CUFF.63203.5"; tss\_id "TSS44526";  
chr22 Cufflinks exon42486937 42487185 . + . gene\_id "XLOC\_035330"; transcript\_id "TCONS\_00058885"; exon\_number  
"1"; oId "CUFF.63277.1"; tss\_id "TSS44558";  
chr22 Cufflinks exon42487301 42487604 . + . gene\_id "XLOC\_035330"; transcript\_id "TCONS\_00058885"; exon\_number  
"2"; oId "CUFF.63277.1"; tss\_id "TSS44558";  
chr22 Cufflinks exon42488123 42488236 . + . gene\_id "XLOC\_035330"; transcript\_id "TCONS\_00058885"; exon\_number  
"3"; oId "CUFF.63277.1"; tss\_id "TSS44558";  
chr22 Cufflinks exon42520052 42520567 . + . gene\_id "XLOC\_035330"; transcript\_id "TCONS\_00058885"; exon\_number  
"4"; oId "CUFF.63277.1"; tss\_id "TSS44558";  
chr22 Cufflinks exon42520880 42521354 . + . gene\_id "XLOC\_035330"; transcript\_id "TCONS\_00058885"; exon\_number  
"5"; oId "CUFF.63277.1"; tss\_id "TSS44558";

|       |                |          |          |   |   |   |                                                                                                                |
|-------|----------------|----------|----------|---|---|---|----------------------------------------------------------------------------------------------------------------|
| chr22 | Cufflinks exon | 42835891 | 42836098 | . | + | . | gene_id "XLOC_035333"; transcript_id "TCONS_00058900"; exon_number "1"; oId "CUFF.63349.2"; tss_id "TSS44563"; |
| chr22 | Cufflinks exon | 42836497 | 42836610 | . | + | . | gene_id "XLOC_035333"; transcript_id "TCONS_00058900"; exon_number "2"; oId "CUFF.63349.2"; tss_id "TSS44563"; |
| chr22 | Cufflinks exon | 42841189 | 42841822 | . | + | . | gene_id "XLOC_035333"; transcript_id "TCONS_00058900"; exon_number "3"; oId "CUFF.63349.2"; tss_id "TSS44563"; |
| chr22 | Cufflinks exon | 42842169 | 42842245 | . | + | . | gene_id "XLOC_035333"; transcript_id "TCONS_00058900"; exon_number "4"; oId "CUFF.63349.2"; tss_id "TSS44563"; |
| chr22 | Cufflinks exon | 42846371 | 42847077 | . | + | . | gene_id "XLOC_035333"; transcript_id "TCONS_00058900"; exon_number "5"; oId "CUFF.63349.2"; tss_id "TSS44563"; |
| chr22 | Cufflinks exon | 42847216 | 42849091 | . | + | . | gene_id "XLOC_035333"; transcript_id "TCONS_00058900"; exon_number "6"; oId "CUFF.63349.2"; tss_id "TSS44563"; |
| chr22 | Cufflinks exon | 42835891 | 42836098 | . | + | . | gene_id "XLOC_035333"; transcript_id "TCONS_00058899"; exon_number "1"; oId "CUFF.63349.1"; tss_id "TSS44563"; |
| chr22 | Cufflinks exon | 42836497 | 42836610 | . | + | . | gene_id "XLOC_035333"; transcript_id "TCONS_00058899"; exon_number "2"; oId "CUFF.63349.1"; tss_id "TSS44563"; |
| chr22 | Cufflinks exon | 42841190 | 42841822 | . | + | . | gene_id "XLOC_035333"; transcript_id "TCONS_00058899"; exon_number "3"; oId "CUFF.63349.1"; tss_id "TSS44563"; |
| chr22 | Cufflinks exon | 42842169 | 42842245 | . | + | . | gene_id "XLOC_035333"; transcript_id "TCONS_00058899"; exon_number "4"; oId "CUFF.63349.1"; tss_id "TSS44563"; |
| chr22 | Cufflinks exon | 42844713 | 42844830 | . | + | . | gene_id "XLOC_035333"; transcript_id "TCONS_00058899"; exon_number "5"; oId "CUFF.63349.1"; tss_id "TSS44563"; |
| chr22 | Cufflinks exon | 42846371 | 42847077 | . | + | . | gene_id "XLOC_035333"; transcript_id "TCONS_00058899"; exon_number "6"; oId "CUFF.63349.1"; tss_id "TSS44563"; |
| chr22 | Cufflinks exon | 42847216 | 42849091 | . | + | . | gene_id "XLOC_035333"; transcript_id "TCONS_00058899"; exon_number "7"; oId "CUFF.63349.1"; tss_id "TSS44563"; |
| chr22 | Cufflinks exon | 42836370 | 42836610 | . | + | . | gene_id "XLOC_035333"; transcript_id "TCONS_00058901"; exon_number "1"; oId "CUFF.63349.3"; tss_id "TSS44564"; |
| chr22 | Cufflinks exon | 42840220 | 42841126 | . | + | . | gene_id "XLOC_035333"; transcript_id "TCONS_00058901"; exon_number "2"; oId "CUFF.63349.3"; tss_id "TSS44564"; |
| chr22 | Cufflinks exon | 42841708 | 42841822 | . | + | . | gene_id "XLOC_035333"; transcript_id "TCONS_00058901"; exon_number "3"; oId "CUFF.63349.3"; tss_id "TSS44564"; |
| chr22 | Cufflinks exon | 42842169 | 42842245 | . | + | . | gene_id "XLOC_035333"; transcript_id "TCONS_00058901"; exon_number "4"; oId "CUFF.63349.3"; tss_id "TSS44564"; |
| chr22 | Cufflinks exon | 42844713 | 42844830 | . | + | . | gene_id "XLOC_035333"; transcript_id "TCONS_00058901"; exon_number "5"; oId "CUFF.63349.3"; tss_id "TSS44564"; |
| chr22 | Cufflinks exon | 42846371 | 42847077 | . | + | . | gene_id "XLOC_035333"; transcript_id "TCONS_00058901"; exon_number "6"; oId "CUFF.63349.3"; tss_id "TSS44564"; |
| chr22 | Cufflinks exon | 42847216 | 42849091 | . | + | . | gene_id "XLOC_035333"; transcript_id "TCONS_00058901"; exon_number "7"; oId "CUFF.63349.3"; tss_id "TSS44564"; |
| chr22 | Cufflinks exon | 42836615 | 42840769 | . | + | . | gene_id "XLOC_035333"; transcript_id "TCONS_00058902"; exon_number "1"; oId "CUFF.63349.4"; tss_id "TSS44565"; |
| chr22 | Cufflinks exon | 42841190 | 42841822 | . | + | . | gene_id "XLOC_035333"; transcript_id "TCONS_00058902"; exon_number "2"; oId "CUFF.63349.4"; tss_id "TSS44565"; |

|                                             |   |   |   |                                                                    |  |
|---------------------------------------------|---|---|---|--------------------------------------------------------------------|--|
| "2"; oId "CUFF.63349.4"; tss_id "TSS44565"; |   |   |   |                                                                    |  |
| chr22 Cufflinks exon42842169 42842245       | . | + | . | gene_id "XLOC_035333"; transcript_id "TCONS_00058902"; exon_number |  |
| "3"; oId "CUFF.63349.4"; tss_id "TSS44565"; |   |   |   |                                                                    |  |
| chr22 Cufflinks exon42844713 42844830       | . | + | . | gene_id "XLOC_035333"; transcript_id "TCONS_00058902"; exon_number |  |
| "4"; oId "CUFF.63349.4"; tss_id "TSS44565"; |   |   |   |                                                                    |  |
| chr22 Cufflinks exon42846371 42846796       | . | + | . | gene_id "XLOC_035333"; transcript_id "TCONS_00058902"; exon_number |  |
| "5"; oId "CUFF.63349.4"; tss_id "TSS44565"; |   |   |   |                                                                    |  |
| chr22 Cufflinks exon42836615 42841126       | . | + | . | gene_id "XLOC_035333"; transcript_id "TCONS_00058903"; exon_number |  |
| "1"; oId "CUFF.63349.5"; tss_id "TSS44565"; |   |   |   |                                                                    |  |
| chr22 Cufflinks exon42842169 42842245       | . | + | . | gene_id "XLOC_035333"; transcript_id "TCONS_00058903"; exon_number |  |
| "2"; oId "CUFF.63349.5"; tss_id "TSS44565"; |   |   |   |                                                                    |  |
| chr22 Cufflinks exon42844713 42844830       | . | + | . | gene_id "XLOC_035333"; transcript_id "TCONS_00058903"; exon_number |  |
| "3"; oId "CUFF.63349.5"; tss_id "TSS44565"; |   |   |   |                                                                    |  |
| chr22 Cufflinks exon42846887 42847077       | . | + | . | gene_id "XLOC_035333"; transcript_id "TCONS_00058903"; exon_number |  |
| "4"; oId "CUFF.63349.5"; tss_id "TSS44565"; |   |   |   |                                                                    |  |
| chr22 Cufflinks exon42847216 42849091       | . | + | . | gene_id "XLOC_035333"; transcript_id "TCONS_00058903"; exon_number |  |
| "5"; oId "CUFF.63349.5"; tss_id "TSS44565"; |   |   |   |                                                                    |  |
| chr22 Cufflinks exon44823741 44824272       | . | + | . | gene_id "XLOC_035354"; transcript_id "TCONS_00058940"; exon_number |  |
| "1"; oId "CUFF.63434.2"; tss_id "TSS44595"; |   |   |   |                                                                    |  |
| chr22 Cufflinks exon44825095 44825228       | . | + | . | gene_id "XLOC_035354"; transcript_id "TCONS_00058940"; exon_number |  |
| "2"; oId "CUFF.63434.2"; tss_id "TSS44595"; |   |   |   |                                                                    |  |
| chr22 Cufflinks exon44831644 44831800       | . | + | . | gene_id "XLOC_035354"; transcript_id "TCONS_00058940"; exon_number |  |
| "3"; oId "CUFF.63434.2"; tss_id "TSS44595"; |   |   |   |                                                                    |  |
| chr22 Cufflinks exon44832773 44833072       | . | + | . | gene_id "XLOC_035354"; transcript_id "TCONS_00058940"; exon_number |  |
| "4"; oId "CUFF.63434.2"; tss_id "TSS44595"; |   |   |   |                                                                    |  |
| chr22 Cufflinks exon44823741 44824272       | . | + | . | gene_id "XLOC_035354"; transcript_id "TCONS_00058939"; exon_number |  |
| "1"; oId "CUFF.63434.1"; tss_id "TSS44595"; |   |   |   |                                                                    |  |
| chr22 Cufflinks exon44831644 44831800       | . | + | . | gene_id "XLOC_035354"; transcript_id "TCONS_00058939"; exon_number |  |
| "2"; oId "CUFF.63434.1"; tss_id "TSS44595"; |   |   |   |                                                                    |  |
| chr22 Cufflinks exon44832773 44833072       | . | + | . | gene_id "XLOC_035354"; transcript_id "TCONS_00058939"; exon_number |  |
| "3"; oId "CUFF.63434.1"; tss_id "TSS44595"; |   |   |   |                                                                    |  |
| chr22 Cufflinks exon46409242 46409690       | . | + | . | gene_id "XLOC_035376"; transcript_id "TCONS_00058982"; exon_number |  |
| "1"; oId "CUFF.63531.2"; tss_id "TSS44627"; |   |   |   |                                                                    |  |
| chr22 Cufflinks exon46410377 46411692       | . | + | . | gene_id "XLOC_035376"; transcript_id "TCONS_00058982"; exon_number |  |
| "2"; oId "CUFF.63531.2"; tss_id "TSS44627"; |   |   |   |                                                                    |  |
| chr22 Cufflinks exon46409242 46409499       | . | + | . | gene_id "XLOC_035376"; transcript_id "TCONS_00058981"; exon_number |  |
| "1"; oId "CUFF.63531.1"; tss_id "TSS44627"; |   |   |   |                                                                    |  |
| chr22 Cufflinks exon46410377 46411692       | . | + | . | gene_id "XLOC_035376"; transcript_id "TCONS_00058981"; exon_number |  |
| "2"; oId "CUFF.63531.1"; tss_id "TSS44627"; |   |   |   |                                                                    |  |
| chr22 Cufflinks exon47009096 47009369       | . | + | . | gene_id "XLOC_035409"; transcript_id "TCONS_00059041"; exon_number |  |
| "1"; oId "CUFF.63590.1"; tss_id "TSS44671"; |   |   |   |                                                                    |  |
| chr22 Cufflinks exon47013491 47013536       | . | + | . | gene_id "XLOC_035409"; transcript_id "TCONS_00059041"; exon_number |  |
| "2"; oId "CUFF.63590.1"; tss_id "TSS44671"; |   |   |   |                                                                    |  |

|       |                        |          |   |   |   |                                                                                                                |
|-------|------------------------|----------|---|---|---|----------------------------------------------------------------------------------------------------------------|
| chr22 | Cufflinks exon47571707 | 47571994 | . | + | . | gene_id "XLOC_035415"; transcript_id "TCONS_00059054"; exon_number "1"; oId "CUFF.63601.1"; tss_id "TSS44677"; |
| chr22 | Cufflinks exon47572022 | 47574844 | . | + | . | gene_id "XLOC_035415"; transcript_id "TCONS_00059054"; exon_number "2"; oId "CUFF.63601.1"; tss_id "TSS44677"; |
| chr22 | Cufflinks exon47853933 | 47854512 | . | + | . | gene_id "XLOC_035428"; transcript_id "TCONS_00059068"; exon_number "1"; oId "CUFF.63622.2"; tss_id "TSS44690"; |
| chr22 | Cufflinks exon47855230 | 47855336 | . | + | . | gene_id "XLOC_035428"; transcript_id "TCONS_00059068"; exon_number "2"; oId "CUFF.63622.2"; tss_id "TSS44690"; |
| chr22 | Cufflinks exon47856495 | 47859416 | . | + | . | gene_id "XLOC_035428"; transcript_id "TCONS_00059068"; exon_number "3"; oId "CUFF.63622.2"; tss_id "TSS44690"; |
| chr22 | Cufflinks exon48409500 | 48409694 | . | + | . | gene_id "XLOC_035443"; transcript_id "TCONS_00059083"; exon_number "1"; oId "CUFF.63655.1"; tss_id "TSS44705"; |
| chr22 | Cufflinks exon48411317 | 48411394 | . | + | . | gene_id "XLOC_035443"; transcript_id "TCONS_00059083"; exon_number "2"; oId "CUFF.63655.1"; tss_id "TSS44705"; |
| chr22 | Cufflinks exon48411569 | 48413308 | . | + | . | gene_id "XLOC_035443"; transcript_id "TCONS_00059083"; exon_number "3"; oId "CUFF.63655.1"; tss_id "TSS44705"; |
| chr22 | Cufflinks exon48413607 | 48418770 | . | + | . | gene_id "XLOC_035443"; transcript_id "TCONS_00059083"; exon_number "4"; oId "CUFF.63655.1"; tss_id "TSS44705"; |
| chr22 | Cufflinks exon49765294 | 49770147 | . | + | . | gene_id "XLOC_035449"; transcript_id "TCONS_00059091"; exon_number "1"; oId "CUFF.63668.1"; tss_id "TSS44713"; |
| chr22 | Cufflinks exon49770320 | 49770365 | . | + | . | gene_id "XLOC_035449"; transcript_id "TCONS_00059091"; exon_number "2"; oId "CUFF.63668.1"; tss_id "TSS44713"; |
| chr22 | Cufflinks exon49772212 | 49772268 | . | + | . | gene_id "XLOC_035449"; transcript_id "TCONS_00059091"; exon_number "3"; oId "CUFF.63668.1"; tss_id "TSS44713"; |
| chr22 | Cufflinks exon51021455 | 51021752 | . | + | . | gene_id "XLOC_035477"; transcript_id "TCONS_00059138"; exon_number "1"; oId "CUFF.63821.2"; tss_id "TSS44746"; |
| chr22 | Cufflinks exon51022027 | 51022360 | . | + | . | gene_id "XLOC_035477"; transcript_id "TCONS_00059138"; exon_number "2"; oId "CUFF.63821.2"; tss_id "TSS44746"; |
| chr22 | Cufflinks exon19742905 | 19743279 | . | - | . | gene_id "XLOC_035552"; transcript_id "TCONS_00059275"; exon_number "1"; oId "CUFF.61669.1"; tss_id "TSS44847"; |
| chr22 | Cufflinks exon19743967 | 19743997 | . | - | . | gene_id "XLOC_035552"; transcript_id "TCONS_00059275"; exon_number "2"; oId "CUFF.61669.1"; tss_id "TSS44847"; |
| chr22 | Cufflinks exon20330728 | 20331038 | . | - | . | gene_id "XLOC_035581"; transcript_id "TCONS_00059309"; exon_number "1"; oId "CUFF.61736.1"; tss_id "TSS44877"; |
| chr22 | Cufflinks exon20331756 | 20331888 | . | - | . | gene_id "XLOC_035581"; transcript_id "TCONS_00059309"; exon_number "2"; oId "CUFF.61736.1"; tss_id "TSS44877"; |
| chr22 | Cufflinks exon20341010 | 20341076 | . | - | . | gene_id "XLOC_035581"; transcript_id "TCONS_00059309"; exon_number "3"; oId "CUFF.61736.1"; tss_id "TSS44877"; |
| chr22 | Cufflinks exon22608154 | 22608192 | . | - | . | gene_id "XLOC_035630"; transcript_id "TCONS_00059403"; exon_number "1"; oId "CUFF.61886.1"; tss_id "TSS44945"; |
| chr22 | Cufflinks exon22610774 | 22611535 | . | - | . | gene_id "XLOC_035630"; transcript_id "TCONS_00059403"; exon_number "2"; oId "CUFF.61886.1"; tss_id "TSS44945"; |
| chr22 | Cufflinks exon22609252 | 22612119 | . | - | . | gene_id "XLOC_035630"; transcript_id "TCONS_00059405"; exon_number "1"; oId "CUFF.61886.1"; tss_id "TSS44945"; |

|                                             |   |   |   |                                                                    |  |
|---------------------------------------------|---|---|---|--------------------------------------------------------------------|--|
| "1"; oId "CUFF.61886.2"; tss_id "TSS44947"; |   |   |   |                                                                    |  |
| chr22 Cufflinks exon22615931 22616000       | . | - | . | gene_id "XLOC_035630"; transcript_id "TCONS_00059405"; exon_number |  |
| "2"; oId "CUFF.61886.2"; tss_id "TSS44947"; |   |   |   |                                                                    |  |
| chr22 Cufflinks exon22618022 22624879       | . | - | . | gene_id "XLOC_035631"; transcript_id "TCONS_00059406"; exon_number |  |
| "1"; oId "CUFF.61889.6"; tss_id "TSS44948"; |   |   |   |                                                                    |  |
| chr22 Cufflinks exon22649206 22649295       | . | - | . | gene_id "XLOC_035631"; transcript_id "TCONS_00059406"; exon_number |  |
| "2"; oId "CUFF.61889.6"; tss_id "TSS44948"; |   |   |   |                                                                    |  |
| chr22 Cufflinks exon22650160 22650330       | . | - | . | gene_id "XLOC_035631"; transcript_id "TCONS_00059406"; exon_number |  |
| "3"; oId "CUFF.61889.6"; tss_id "TSS44948"; |   |   |   |                                                                    |  |
| chr22 Cufflinks exon22652047 22652441       | . | - | . | gene_id "XLOC_035631"; transcript_id "TCONS_00059406"; exon_number |  |
| "4"; oId "CUFF.61889.6"; tss_id "TSS44948"; |   |   |   |                                                                    |  |
| chr22 Cufflinks exon22700356 22700389       | . | - | . | gene_id "XLOC_035632"; transcript_id "TCONS_00059407"; exon_number |  |
| "1"; oId "CUFF.61898.1"; tss_id "TSS44949"; |   |   |   |                                                                    |  |
| chr22 Cufflinks exon22700908 22705269       | . | - | . | gene_id "XLOC_035632"; transcript_id "TCONS_00059407"; exon_number |  |
| "2"; oId "CUFF.61898.1"; tss_id "TSS44949"; |   |   |   |                                                                    |  |
| chr22 Cufflinks exon22703932 22703986       | . | - | . | gene_id "XLOC_035632"; transcript_id "TCONS_00059408"; exon_number |  |
| "1"; oId "CUFF.61898.2"; tss_id "TSS44950"; |   |   |   |                                                                    |  |
| chr22 Cufflinks exon22704683 22704843       | . | - | . | gene_id "XLOC_035632"; transcript_id "TCONS_00059408"; exon_number |  |
| "2"; oId "CUFF.61898.2"; tss_id "TSS44950"; |   |   |   |                                                                    |  |
| chr22 Cufflinks exon22707532 22710009       | . | - | . | gene_id "XLOC_035632"; transcript_id "TCONS_00059408"; exon_number |  |
| "3"; oId "CUFF.61898.2"; tss_id "TSS44950"; |   |   |   |                                                                    |  |
| chr22 Cufflinks exon25822105 25823506       | . | - | . | gene_id "XLOC_035713"; transcript_id "TCONS_00059525"; exon_number |  |
| "1"; oId "CUFF.62178.2"; tss_id "TSS45042"; |   |   |   |                                                                    |  |
| chr22 Cufflinks exon25840948 25841139       | . | - | . | gene_id "XLOC_035713"; transcript_id "TCONS_00059525"; exon_number |  |
| "2"; oId "CUFF.62178.2"; tss_id "TSS45042"; |   |   |   |                                                                    |  |
| chr22 Cufflinks exon25843651 25843803       | . | - | . | gene_id "XLOC_035713"; transcript_id "TCONS_00059525"; exon_number |  |
| "3"; oId "CUFF.62178.2"; tss_id "TSS45042"; |   |   |   |                                                                    |  |
| chr22 Cufflinks exon25843909 25843937       | . | - | . | gene_id "XLOC_035713"; transcript_id "TCONS_00059525"; exon_number |  |
| "4"; oId "CUFF.62178.2"; tss_id "TSS45042"; |   |   |   |                                                                    |  |
| chr22 Cufflinks exon25828135 25831301       | . | - | . | gene_id "XLOC_035713"; transcript_id "TCONS_00059529"; exon_number |  |
| "1"; oId "CUFF.62178.4"; tss_id "TSS45042"; |   |   |   |                                                                    |  |
| chr22 Cufflinks exon25837680 25837738       | . | - | . | gene_id "XLOC_035713"; transcript_id "TCONS_00059529"; exon_number |  |
| "2"; oId "CUFF.62178.4"; tss_id "TSS45042"; |   |   |   |                                                                    |  |
| chr22 Cufflinks exon25840953 25841139       | . | - | . | gene_id "XLOC_035713"; transcript_id "TCONS_00059529"; exon_number |  |
| "3"; oId "CUFF.62178.4"; tss_id "TSS45042"; |   |   |   |                                                                    |  |
| chr22 Cufflinks exon25843651 25843803       | . | - | . | gene_id "XLOC_035713"; transcript_id "TCONS_00059529"; exon_number |  |
| "4"; oId "CUFF.62178.4"; tss_id "TSS45042"; |   |   |   |                                                                    |  |
| chr22 Cufflinks exon25843909 25844015       | . | - | . | gene_id "XLOC_035713"; transcript_id "TCONS_00059529"; exon_number |  |
| "5"; oId "CUFF.62178.4"; tss_id "TSS45042"; |   |   |   |                                                                    |  |
| chr22 Cufflinks exon32755893 32756826       | . | - | . | gene_id "XLOC_035799"; transcript_id "TCONS_00059684"; exon_number |  |
| "1"; oId "CUFF.62609.3"; tss_id "TSS45165"; |   |   |   |                                                                    |  |
| chr22 Cufflinks exon32758959 32759045       | . | - | . | gene_id "XLOC_035799"; transcript_id "TCONS_00059684"; exon_number |  |
| "2"; oId "CUFF.62609.3"; tss_id "TSS45165"; |   |   |   |                                                                    |  |

|       |                |          |          |   |   |   |                                                                                                                |
|-------|----------------|----------|----------|---|---|---|----------------------------------------------------------------------------------------------------------------|
| chr22 | Cufflinks exon | 32763677 | 32763701 | . | - | . | gene_id "XLOC_035799"; transcript_id "TCONS_00059684"; exon_number "3"; oId "CUFF.62609.3"; tss_id "TSS45165"; |
| chr22 | Cufflinks exon | 32764484 | 32764554 | . | - | . | gene_id "XLOC_035799"; transcript_id "TCONS_00059684"; exon_number "4"; oId "CUFF.62609.3"; tss_id "TSS45165"; |
| chr22 | Cufflinks exon | 32766886 | 32767063 | . | - | . | gene_id "XLOC_035799"; transcript_id "TCONS_00059684"; exon_number "5"; oId "CUFF.62609.3"; tss_id "TSS45165"; |
| chr22 | Cufflinks exon | 32755893 | 32756826 | . | - | . | gene_id "XLOC_035799"; transcript_id "TCONS_00059685"; exon_number "1"; oId "CUFF.62609.1"; tss_id "TSS45166"; |
| chr22 | Cufflinks exon | 32763677 | 32763701 | . | - | . | gene_id "XLOC_035799"; transcript_id "TCONS_00059685"; exon_number "2"; oId "CUFF.62609.1"; tss_id "TSS45166"; |
| chr22 | Cufflinks exon | 32764484 | 32764554 | . | - | . | gene_id "XLOC_035799"; transcript_id "TCONS_00059685"; exon_number "3"; oId "CUFF.62609.1"; tss_id "TSS45166"; |
| chr22 | Cufflinks exon | 32766886 | 32766928 | . | - | . | gene_id "XLOC_035799"; transcript_id "TCONS_00059685"; exon_number "4"; oId "CUFF.62609.1"; tss_id "TSS45166"; |
| chr22 | Cufflinks exon | 32767185 | 32767251 | . | - | . | gene_id "XLOC_035799"; transcript_id "TCONS_00059685"; exon_number "5"; oId "CUFF.62609.1"; tss_id "TSS45166"; |
| chr22 | Cufflinks exon | 32755893 | 32756826 | . | - | . | gene_id "XLOC_035799"; transcript_id "TCONS_00059686"; exon_number "1"; oId "CUFF.62609.2"; tss_id "TSS45167"; |
| chr22 | Cufflinks exon | 32763677 | 32763701 | . | - | . | gene_id "XLOC_035799"; transcript_id "TCONS_00059686"; exon_number "2"; oId "CUFF.62609.2"; tss_id "TSS45167"; |
| chr22 | Cufflinks exon | 32764484 | 32764554 | . | - | . | gene_id "XLOC_035799"; transcript_id "TCONS_00059686"; exon_number "3"; oId "CUFF.62609.2"; tss_id "TSS45167"; |
| chr22 | Cufflinks exon | 32766886 | 32766928 | . | - | . | gene_id "XLOC_035799"; transcript_id "TCONS_00059686"; exon_number "4"; oId "CUFF.62609.2"; tss_id "TSS45167"; |
| chr22 | Cufflinks exon | 32770754 | 32770848 | . | - | . | gene_id "XLOC_035799"; transcript_id "TCONS_00059686"; exon_number "5"; oId "CUFF.62609.2"; tss_id "TSS45167"; |
| chr22 | Cufflinks exon | 32773248 | 32773336 | . | - | . | gene_id "XLOC_035799"; transcript_id "TCONS_00059686"; exon_number "6"; oId "CUFF.62609.2"; tss_id "TSS45167"; |
| chr22 | Cufflinks exon | 32777135 | 32777242 | . | - | . | gene_id "XLOC_035799"; transcript_id "TCONS_00059686"; exon_number "7"; oId "CUFF.62609.2"; tss_id "TSS45167"; |
| chr22 | Cufflinks exon | 32777972 | 32783047 | . | - | . | gene_id "XLOC_035799"; transcript_id "TCONS_00059686"; exon_number "8"; oId "CUFF.62609.2"; tss_id "TSS45167"; |
| chr22 | Cufflinks exon | 35514833 | 35515918 | . | - | . | gene_id "XLOC_035822"; transcript_id "TCONS_00059716"; exon_number "1"; oId "CUFF.62644.6"; tss_id "TSS45194"; |
| chr22 | Cufflinks exon | 35516006 | 35516060 | . | - | . | gene_id "XLOC_035822"; transcript_id "TCONS_00059716"; exon_number "2"; oId "CUFF.62644.6"; tss_id "TSS45194"; |
| chr22 | Cufflinks exon | 35567428 | 35567595 | . | - | . | gene_id "XLOC_035822"; transcript_id "TCONS_00059716"; exon_number "3"; oId "CUFF.62644.6"; tss_id "TSS45194"; |
| chr22 | Cufflinks exon | 35568332 | 35568465 | . | - | . | gene_id "XLOC_035822"; transcript_id "TCONS_00059716"; exon_number "4"; oId "CUFF.62644.6"; tss_id "TSS45194"; |
| chr22 | Cufflinks exon | 35514833 | 35515897 | . | - | . | gene_id "XLOC_035822"; transcript_id "TCONS_00059717"; exon_number "1"; oId "CUFF.62644.5"; tss_id "TSS45195"; |
| chr22 | Cufflinks exon | 35516006 | 35516060 | . | - | . | gene_id "XLOC_035822"; transcript_id "TCONS_00059717"; exon_number "2"; oId "CUFF.62644.5"; tss_id "TSS45195"; |

"2"; oId "CUFF.62644.5"; tss\_id "TSS45195";  
chr22 Cufflinks exon35567428 35567595 . - . gene\_id "XLOC\_035822"; transcript\_id "TCONS\_00059717"; exon\_number  
"3"; oId "CUFF.62644.5"; tss\_id "TSS45195";  
chr22 Cufflinks exon35568332 35568457 . - . gene\_id "XLOC\_035822"; transcript\_id "TCONS\_00059717"; exon\_number  
"4"; oId "CUFF.62644.5"; tss\_id "TSS45195";  
chr22 Cufflinks exon35626995 35627049 . - . gene\_id "XLOC\_035822"; transcript\_id "TCONS\_00059717"; exon\_number  
"5"; oId "CUFF.62644.5"; tss\_id "TSS45195";  
chr22 Cufflinks exon37587766 37587777 . - . gene\_id "XLOC\_035876"; transcript\_id "TCONS\_00059800"; exon\_number  
"1"; oId "CUFF.62843.14"; tss\_id "TSS45265";  
chr22 Cufflinks exon37593643 37594236 . - . gene\_id "XLOC\_035876"; transcript\_id "TCONS\_00059800"; exon\_number  
"2"; oId "CUFF.62843.14"; tss\_id "TSS45265";  
chr22 Cufflinks exon37854649 37855097 . - . gene\_id "XLOC\_035880"; transcript\_id "TCONS\_00059810"; exon\_number  
"1"; oId "CUFF.62854.4"; tss\_id "TSS45274";  
chr22 Cufflinks exon37859359 37859524 . - . gene\_id "XLOC\_035880"; transcript\_id "TCONS\_00059810"; exon\_number  
"2"; oId "CUFF.62854.4"; tss\_id "TSS45274";  
chr22 Cufflinks exon37860348 37861756 . - . gene\_id "XLOC\_035881"; transcript\_id "TCONS\_00059811"; exon\_number  
"1"; oId "CUFF.62855.4"; tss\_id "TSS45275";  
chr22 Cufflinks exon37862689 37863886 . - . gene\_id "XLOC\_035881"; transcript\_id "TCONS\_00059811"; exon\_number  
"2"; oId "CUFF.62855.4"; tss\_id "TSS45275";  
chr22 Cufflinks exon41070470 41070479 . - . gene\_id "XLOC\_035973"; transcript\_id "TCONS\_00059951"; exon\_number  
"1"; oId "CUFF.63138.1"; tss\_id "TSS45390";  
chr22 Cufflinks exon41075143 41076590 . - . gene\_id "XLOC\_035973"; transcript\_id "TCONS\_00059951"; exon\_number  
"2"; oId "CUFF.63138.1"; tss\_id "TSS45390";  
chr22 Cufflinks exon42062463 42063013 . - . gene\_id "XLOC\_035993"; transcript\_id "TCONS\_00059985"; exon\_number  
"1"; oId "CUFF.63230.2"; tss\_id "TSS45417";  
chr22 Cufflinks exon42063356 42063891 . - . gene\_id "XLOC\_035993"; transcript\_id "TCONS\_00059985"; exon\_number  
"2"; oId "CUFF.63230.2"; tss\_id "TSS45417";  
chr22 Cufflinks exon42760406 42760731 . - . gene\_id "XLOC\_036055"; transcript\_id "TCONS\_00060061"; exon\_number  
"1"; oId "CUFF.63347.3"; tss\_id "TSS45483";  
chr22 Cufflinks exon42764721 42765214 . - . gene\_id "XLOC\_036055"; transcript\_id "TCONS\_00060061"; exon\_number  
"2"; oId "CUFF.63347.3"; tss\_id "TSS45483";  
chr22 Cufflinks exon42760406 42760731 . - . gene\_id "XLOC\_036055"; transcript\_id "TCONS\_00060060"; exon\_number  
"1"; oId "CUFF.63347.2"; tss\_id "TSS45483";  
chr22 Cufflinks exon42765064 42765214 . - . gene\_id "XLOC\_036055"; transcript\_id "TCONS\_00060060"; exon\_number  
"2"; oId "CUFF.63347.2"; tss\_id "TSS45483";  
chr22 Cufflinks exon42760406 42761150 . - . gene\_id "XLOC\_036055"; transcript\_id "TCONS\_00060059"; exon\_number  
"1"; oId "CUFF.63347.1"; tss\_id "TSS45483";  
chr22 Cufflinks exon 42764721 42765214 . - . gene\_id "XLOC\_036055"; transcript\_id "TCONS\_00060059";  
exon\_number "2"; oId "CUFF.63347.1"; tss\_id "TSS45483";  
chr22 Cufflinks exon 43172136 43172738 . - . gene\_id "XLOC\_036061"; transcript\_id "TCONS\_00060076";  
exon\_number "1"; oId "CUFF.63367.1"; tss\_id "TSS45494";  
chr22 Cufflinks exon 43173227 43173326 . - . gene\_id "XLOC\_036061"; transcript\_id "TCONS\_00060076";  
exon\_number "2"; oId "CUFF.63367.1"; tss\_id "TSS45494";



chr22 Cufflinks exon 46000312 46000638 . - . gene\_id "XLOC\_036100"; transcript\_id "TCONS\_00060139";  
exon\_number "1"; oId "CUFF.63514.1"; tss\_id "TSS45546";

chr22 Cufflinks exon 46001281 46001393 . - . gene\_id "XLOC\_036100"; transcript\_id "TCONS\_00060139";  
exon\_number "2"; oId "CUFF.63514.1"; tss\_id "TSS45546";

chr22 Cufflinks exon 46016089 46016178 . - . gene\_id "XLOC\_036100"; transcript\_id "TCONS\_00060139";  
exon\_number "3"; oId "CUFF.63514.1"; tss\_id "TSS45546";

chr22 Cufflinks exon 46016640 46016717 . - . gene\_id "XLOC\_036100"; transcript\_id "TCONS\_00060139";  
exon\_number "4"; oId "CUFF.63514.1"; tss\_id "TSS45546";

chr22 Cufflinks exon 46435787 46436932 . - . gene\_id "XLOC\_036103"; transcript\_id "TCONS\_00060144";  
exon\_number "1"; oId "CUFF.63539.3"; tss\_id "TSS45551";

chr22 Cufflinks exon 46438454 46439178 . - . gene\_id "XLOC\_036103"; transcript\_id "TCONS\_00060144";  
exon\_number "2"; oId "CUFF.63539.3"; tss\_id "TSS45551";

chr22 Cufflinks exon 46435787 46436933 . - . gene\_id "XLOC\_036103"; transcript\_id "TCONS\_00060145";  
exon\_number "1"; oId "CUFF.63539.1"; tss\_id "TSS45552";

chr22 Cufflinks exon 46438455 46439685 . - . gene\_id "XLOC\_036103"; transcript\_id "TCONS\_00060145";  
exon\_number "2"; oId "CUFF.63539.1"; tss\_id "TSS45552";

chr22 Cufflinks exon 46435787 46436932 . - . gene\_id "XLOC\_036103"; transcript\_id "TCONS\_00060146";  
exon\_number "1"; oId "CUFF.63539.4"; tss\_id "TSS45553";

chr22 Cufflinks exon 46438454 46438520 . - . gene\_id "XLOC\_036103"; transcript\_id "TCONS\_00060146";  
exon\_number "2"; oId "CUFF.63539.4"; tss\_id "TSS45553";

chr22 Cufflinks exon 46439443 46439579 . - . gene\_id "XLOC\_036103"; transcript\_id "TCONS\_00060146";  
exon\_number "3"; oId "CUFF.63539.4"; tss\_id "TSS45553";

chr22 Cufflinks exon 46440489 46440748 . - . gene\_id "XLOC\_036103"; transcript\_id "TCONS\_00060146"; exon\_number  
"4"; oId "CUFF.63539.4"; tss\_id "TSS45553";

chr22 Cufflinks exon 48488757 48489923 . - . gene\_id "XLOC\_036121"; transcript\_id "TCONS\_00060177"; exon\_number  
"1"; oId "CUFF.63656.2"; tss\_id "TSS45578";

chr22 Cufflinks exon 48491030 48497021 . - . gene\_id "XLOC\_036121"; transcript\_id "TCONS\_00060177"; exon\_number  
"2"; oId "CUFF.63656.2"; tss\_id "TSS45578";

chr22 Cufflinks exon 49806406 49810384 . - . gene\_id "XLOC\_036124"; transcript\_id "TCONS\_00060180"; exon\_number  
"1"; oId "CUFF.63674.1"; tss\_id "TSS45581";

chr22 Cufflinks exon 49810464 49810577 . - . gene\_id "XLOC\_036124"; transcript\_id "TCONS\_00060180"; exon\_number  
"2"; oId "CUFF.63674.1"; tss\_id "TSS45581";

chr22 Cufflinks exon 49834525 49834861 . - . gene\_id "XLOC\_036124"; transcript\_id "TCONS\_00060180"; exon\_number  
"3"; oId "CUFF.63674.1"; tss\_id "TSS45581";

chr22 Cufflinks exon 49883838 49883866 . - . gene\_id "XLOC\_036124"; transcript\_id "TCONS\_00060180"; exon\_number  
"4"; oId "CUFF.63674.1"; tss\_id "TSS45581";

chr22 Cufflinks exon 49806406 49809684 . - . gene\_id "XLOC\_036124"; transcript\_id "TCONS\_00060181"; exon\_number  
"1"; oId "CUFF.63674.6"; tss\_id "TSS45581";

chr22 Cufflinks exon 49834525 49834861 . - . gene\_id "XLOC\_036124"; transcript\_id "TCONS\_00060181"; exon\_number  
"2"; oId "CUFF.63674.6"; tss\_id "TSS45581";

chr22 Cufflinks exon 49883838 49883901 . - . gene\_id "XLOC\_036124"; transcript\_id "TCONS\_00060181"; exon\_number  
"3"; oId "CUFF.63674.6"; tss\_id "TSS45581";

chr22 Cufflinks exon 49883402 49883901 . - . gene\_id "XLOC\_036124"; transcript\_id "TCONS\_00060198"; exon\_number

"1"; oId "CUFF.63674.8"; tss\_id "TSS45585";  
chr22 Cufflinks exon49886072 49886143 . - . gene\_id "XLOC\_036124"; transcript\_id "TCONS\_00060198"; exon\_number  
"2"; oId "CUFF.63674.8"; tss\_id "TSS45585";  
chr22 Cufflinks exon49829023 49830024 . - . gene\_id "XLOC\_036129"; transcript\_id "TCONS\_00060191"; exon\_number  
"1"; oId "CUFF.63682.1"; tss\_id "TSS45591";  
chr22 Cufflinks exon49831356 49833735 . - . gene\_id "XLOC\_036129"; transcript\_id "TCONS\_00060191"; exon\_number  
"2"; oId "CUFF.63682.1"; tss\_id "TSS45591";  
chr22 Cufflinks exon49948278 49948487 . - . gene\_id "XLOC\_036142"; transcript\_id "TCONS\_00060206"; exon\_number  
"1"; oId "CUFF.63700.1"; tss\_id "TSS45604";  
chr22 Cufflinks exon49948580 49949147 . - . gene\_id "XLOC\_036142"; transcript\_id "TCONS\_00060206"; exon\_number  
"2"; oId "CUFF.63700.1"; tss\_id "TSS45604";  
chr22 Cufflinks exon50008404 50009343 . - . gene\_id "XLOC\_036161"; transcript\_id "TCONS\_00060225"; exon\_number  
"1"; oId "CUFF.63725.1"; tss\_id "TSS45623";  
chr22 Cufflinks exon50009452 50009977 . - . gene\_id "XLOC\_036161"; transcript\_id "TCONS\_00060225"; exon\_number  
"2"; oId "CUFF.63725.1"; tss\_id "TSS45623";  
chr22 Cufflinks exon50010729 50011331 . - . gene\_id "XLOC\_036161"; transcript\_id "TCONS\_00060225"; exon\_number  
"3"; oId "CUFF.63725.1"; tss\_id "TSS45623";  
chr3 Cufflinks exon6532105 6532359 . + . gene\_id "XLOC\_036234"; transcript\_id "TCONS\_00060361"; exon\_number "1"; oId  
"CUFF.64008.4"; tss\_id "TSS45719";  
chr3 Cufflinks exon6752140 6752232 . + . gene\_id "XLOC\_036234"; transcript\_id "TCONS\_00060361"; exon\_number "2"; oId  
"CUFF.64008.4"; tss\_id "TSS45719";  
chr3 Cufflinks exon6759256 6759354 . + . gene\_id "XLOC\_036234"; transcript\_id "TCONS\_00060361"; exon\_number "3"; oId  
"CUFF.64008.4"; tss\_id "TSS45719";  
chr3 Cufflinks exon6766137 6766233 . + . gene\_id "XLOC\_036234"; transcript\_id "TCONS\_00060361"; exon\_number "4"; oId  
"CUFF.64008.4"; tss\_id "TSS45719";  
chr3 Cufflinks exon6773958 6774182 . + . gene\_id "XLOC\_036234"; transcript\_id "TCONS\_00060361"; exon\_number "5"; oId  
"CUFF.64008.4"; tss\_id "TSS45719";  
chr3 Cufflinks exon6777349 6781618 . + . gene\_id "XLOC\_036234"; transcript\_id "TCONS\_00060361"; exon\_number "6"; oId  
"CUFF.64008.4"; tss\_id "TSS45719";  
chr3 Cufflinks exon6532105 6532359 . + . gene\_id "XLOC\_036234"; transcript\_id "TCONS\_00060360"; exon\_number "1"; oId  
"CUFF.64008.3"; tss\_id "TSS45719";  
chr3 Cufflinks exon6736464 6736564 . + . gene\_id "XLOC\_036234"; transcript\_id "TCONS\_00060360"; exon\_number "2"; oId  
"CUFF.64008.3"; tss\_id "TSS45719";  
chr3 Cufflinks exon6759256 6759354 . + . gene\_id "XLOC\_036234"; transcript\_id "TCONS\_00060360"; exon\_number "3"; oId  
"CUFF.64008.3"; tss\_id "TSS45719";  
chr3 Cufflinks exon6766137 6766233 . + . gene\_id "XLOC\_036234"; transcript\_id "TCONS\_00060360"; exon\_number "4"; oId  
"CUFF.64008.3"; tss\_id "TSS45719";  
chr3 Cufflinks exon6773958 6774182 . + . gene\_id "XLOC\_036234"; transcript\_id "TCONS\_00060360"; exon\_number "5"; oId  
"CUFF.64008.3"; tss\_id "TSS45719";  
chr3 Cufflinks exon6777349 6781618 . + . gene\_id "XLOC\_036234"; transcript\_id "TCONS\_00060360"; exon\_number "6"; oId  
"CUFF.64008.3"; tss\_id "TSS45719";  
chr3 Cufflinks exon6532105 6532359 . + . gene\_id "XLOC\_036234"; transcript\_id "TCONS\_00060359"; exon\_number "1"; oId  
"CUFF.64008.2"; tss\_id "TSS45719";

chr3 Cufflinks exon6759256 6759354 . + . gene\_id "XLOC\_036234"; transcript\_id "TCONS\_00060359"; exon\_number "2"; oId "CUFF.64008.2"; tss\_id "TSS45719";

chr3 Cufflinks exon6761774 6761958 . + . gene\_id "XLOC\_036234"; transcript\_id "TCONS\_00060359"; exon\_number "3"; oId "CUFF.64008.2"; tss\_id "TSS45719";

chr3 Cufflinks exon6766137 6766233 . + . gene\_id "XLOC\_036234"; transcript\_id "TCONS\_00060359"; exon\_number "4"; oId "CUFF.64008.2"; tss\_id "TSS45719";

chr3 Cufflinks exon6773958 6774182 . + . gene\_id "XLOC\_036234"; transcript\_id "TCONS\_00060359"; exon\_number "5"; oId "CUFF.64008.2"; tss\_id "TSS45719";

chr3 Cufflinks exon6777344 6781618 . + . gene\_id "XLOC\_036234"; transcript\_id "TCONS\_00060359"; exon\_number "6"; oId "CUFF.64008.2"; tss\_id "TSS45719";

chr3 Cufflinks exon6532163 6532359 . + . gene\_id "XLOC\_036234"; transcript\_id "TCONS\_00060362"; exon\_number "1"; oId "CUFF.64008.5"; tss\_id "TSS45719";

chr3 Cufflinks exon6759256 6759354 . + . gene\_id "XLOC\_036234"; transcript\_id "TCONS\_00060362"; exon\_number "2"; oId "CUFF.64008.5"; tss\_id "TSS45719";

chr3 Cufflinks exon6766137 6766233 . + . gene\_id "XLOC\_036234"; transcript\_id "TCONS\_00060362"; exon\_number "3"; oId "CUFF.64008.5"; tss\_id "TSS45719";

chr3 Cufflinks exon6773958 6774182 . + . gene\_id "XLOC\_036234"; transcript\_id "TCONS\_00060362"; exon\_number "4"; oId "CUFF.64008.5"; tss\_id "TSS45719";

chr3 Cufflinks exon6777349 6781618 . + . gene\_id "XLOC\_036234"; transcript\_id "TCONS\_00060362"; exon\_number "5"; oId "CUFF.64008.5"; tss\_id "TSS45719";

chr3 Cufflinks exon6549425 6549638 . + . gene\_id "XLOC\_036234"; transcript\_id "TCONS\_00060366"; exon\_number "1"; oId "CUFF.64008.10"; tss\_id "TSS45720";

chr3 Cufflinks exon6736462 6736564 . + . gene\_id "XLOC\_036234"; transcript\_id "TCONS\_00060366"; exon\_number "2"; oId "CUFF.64008.10"; tss\_id "TSS45720";

chr3 Cufflinks exon6739083 6739198 . + . gene\_id "XLOC\_036234"; transcript\_id "TCONS\_00060366"; exon\_number "3"; oId "CUFF.64008.10"; tss\_id "TSS45720";

chr3 Cufflinks exon6739519 6739634 . + . gene\_id "XLOC\_036234"; transcript\_id "TCONS\_00060366"; exon\_number "4"; oId "CUFF.64008.10"; tss\_id "TSS45720";

chr3 Cufflinks exon6752140 6752230 . + . gene\_id "XLOC\_036234"; transcript\_id "TCONS\_00060366"; exon\_number "5"; oId "CUFF.64008.10"; tss\_id "TSS45720";

chr3 Cufflinks exon6759256 6759354 . + . gene\_id "XLOC\_036234"; transcript\_id "TCONS\_00060366"; exon\_number "6"; oId "CUFF.64008.10"; tss\_id "TSS45720";

chr3 Cufflinks exon6761774 6761958 . + . gene\_id "XLOC\_036234"; transcript\_id "TCONS\_00060366"; exon\_number "7"; oId "CUFF.64008.10"; tss\_id "TSS45720";

chr3 Cufflinks exon6766137 6766233 . + . gene\_id "XLOC\_036234"; transcript\_id "TCONS\_00060366"; exon\_number "8"; oId "CUFF.64008.10"; tss\_id "TSS45720";

chr3 Cufflinks exon6773958 6774182 . + . gene\_id "XLOC\_036234"; transcript\_id "TCONS\_00060366"; exon\_number "9"; oId "CUFF.64008.10"; tss\_id "TSS45720";

chr3 Cufflinks exon6776186 6776328 . + . gene\_id "XLOC\_036234"; transcript\_id "TCONS\_00060366"; exon\_number "10"; oId "CUFF.64008.10"; tss\_id "TSS45720";

chr3 Cufflinks exon6549425 6549644 . + . gene\_id "XLOC\_036234"; transcript\_id "TCONS\_00060369"; exon\_number "1"; oId "CUFF.64008.9"; tss\_id "TSS45720";

chr3 Cufflinks exon6736471 6736564 . + . gene\_id "XLOC\_036234"; transcript\_id "TCONS\_00060369"; exon\_number "2"; oId

|                                                                                   |   |   |                                                                             |
|-----------------------------------------------------------------------------------|---|---|-----------------------------------------------------------------------------|
| "CUFF.64008.9"; tss_id "TSS45720";<br>chr3 Cufflinks exon6759256 6759354 .        | + | . | gene_id "XLOC_036234"; transcript_id "TCONS_00060369"; exon_number "3"; oId |
| "CUFF.64008.9"; tss_id "TSS45720";<br>chr3 Cufflinks exon6766137 6766233 .        | + | . | gene_id "XLOC_036234"; transcript_id "TCONS_00060369"; exon_number "4"; oId |
| "CUFF.64008.9"; tss_id "TSS45720";<br>chr3 Cufflinks exon6773958 6774182 .        | + | . | gene_id "XLOC_036234"; transcript_id "TCONS_00060369"; exon_number "5"; oId |
| "CUFF.64008.9"; tss_id "TSS45720";<br>chr3 Cufflinks exon6777349 6781618 .        | + | . | gene_id "XLOC_036234"; transcript_id "TCONS_00060369"; exon_number "6"; oId |
| "CUFF.64008.9"; tss_id "TSS45720";<br>chr3 Cufflinks exon6549425 6549644 .        | + | . | gene_id "XLOC_036234"; transcript_id "TCONS_00060367"; exon_number "1"; oId |
| "CUFF.64008.11"; tss_id "TSS45720";<br>chr3 Cufflinks exon6759260 6759354 .       | + | . | gene_id "XLOC_036234"; transcript_id "TCONS_00060367"; exon_number "2"; oId |
| "CUFF.64008.11"; tss_id "TSS45720";<br>chr3 Cufflinks exon6761774 6761958 .       | + | . | gene_id "XLOC_036234"; transcript_id "TCONS_00060367"; exon_number "3"; oId |
| "CUFF.64008.11"; tss_id "TSS45720";<br>chr3 Cufflinks exon6766137 6766233 .       | + | . | gene_id "XLOC_036234"; transcript_id "TCONS_00060367"; exon_number "4"; oId |
| "CUFF.64008.11"; tss_id "TSS45720";<br>chr3 Cufflinks exon6773958 6774182 .       | + | . | gene_id "XLOC_036234"; transcript_id "TCONS_00060367"; exon_number "5"; oId |
| "CUFF.64008.11"; tss_id "TSS45720";<br>chr3 Cufflinks exon6777349 6781618 .       | + | . | gene_id "XLOC_036234"; transcript_id "TCONS_00060367"; exon_number "6"; oId |
| "CUFF.64008.11"; tss_id "TSS45720";<br>chr3 Cufflinks exon15295691 15299113 .     | + | . | gene_id "XLOC_036354"; transcript_id "TCONS_00060564"; exon_number "1";     |
| oId "CUFF.64430.1"; tss_id "TSS45868";<br>chr3 Cufflinks exon15300141 15302089 .  | + | . | gene_id "XLOC_036354"; transcript_id "TCONS_00060564"; exon_number "2";     |
| oId "CUFF.64430.1"; tss_id "TSS45868";<br>chr3 Cufflinks exon15305803 15306005 .  | + | . | gene_id "XLOC_036354"; transcript_id "TCONS_00060564"; exon_number "3";     |
| oId "CUFF.64430.1"; tss_id "TSS45868";<br>chr3 Cufflinks exon18372125 18372454 .  | + | . | gene_id "XLOC_036377"; transcript_id "TCONS_00060625"; exon_number "1";     |
| oId "CUFF.64543.18"; tss_id "TSS45904";<br>chr3 Cufflinks exon18383739 18385664 . | + | . | gene_id "XLOC_036377"; transcript_id "TCONS_00060625"; exon_number "2";     |
| oId "CUFF.64543.18"; tss_id "TSS45904";<br>chr3 Cufflinks exon18486484 18486934 . | + | . | gene_id "XLOC_036395"; transcript_id "TCONS_00060628"; exon_number "1";     |
| oId "CUFF.64600.3"; tss_id "TSS45922";<br>chr3 Cufflinks exon18504972 18505037 .  | + | . | gene_id "XLOC_036395"; transcript_id "TCONS_00060628"; exon_number "2";     |
| oId "CUFF.64600.3"; tss_id "TSS45922";<br>chr3 Cufflinks exon18505779 18505831 .  | + | . | gene_id "XLOC_036395"; transcript_id "TCONS_00060628"; exon_number "3";     |
| oId "CUFF.64600.3"; tss_id "TSS45922";<br>chr3 Cufflinks exon18507455 18507531 .  | + | . | gene_id "XLOC_036395"; transcript_id "TCONS_00060628"; exon_number "4";     |
| oId "CUFF.64600.3"; tss_id "TSS45922";<br>chr3 Cufflinks exon18567879 18568032 .  | + | . | gene_id "XLOC_036395"; transcript_id "TCONS_00060628"; exon_number "5";     |
| oId "CUFF.64600.3"; tss_id "TSS45922";<br>chr3 Cufflinks exon18568666 18568818 .  | + | . | gene_id "XLOC_036395"; transcript_id "TCONS_00060628"; exon_number "6";     |
| oId "CUFF.64600.3"; tss_id "TSS45922";                                            |   |   |                                                                             |

|                                        |          |   |   |   |                                                                         |
|----------------------------------------|----------|---|---|---|-------------------------------------------------------------------------|
| chr3 Cufflinks exon18571473            | 18571677 | . | + | . | gene_id "XLOC_036395"; transcript_id "TCONS_00060628"; exon_number "7"; |
| oId "CUFF.64600.3"; tss_id "TSS45922"; |          |   |   |   |                                                                         |
| chr3 Cufflinks exon18576179            | 18576287 | . | + | . | gene_id "XLOC_036395"; transcript_id "TCONS_00060628"; exon_number "8"; |
| oId "CUFF.64600.3"; tss_id "TSS45922"; |          |   |   |   |                                                                         |
| chr3 Cufflinks exon27753639            | 27753812 | . | + | . | gene_id "XLOC_036460"; transcript_id "TCONS_00060706"; exon_number "1"; |
| oId "CUFF.64755.1"; tss_id "TSS45993"; |          |   |   |   |                                                                         |
| chr3 Cufflinks exon27754906            | 27756037 | . | + | . | gene_id "XLOC_036460"; transcript_id "TCONS_00060706"; exon_number "2"; |
| oId "CUFF.64755.1"; tss_id "TSS45993"; |          |   |   |   |                                                                         |
| chr3 Cufflinks exon41286419            | 41286633 | . | + | . | gene_id "XLOC_036596"; transcript_id "TCONS_00060925"; exon_number "1"; |
| oId "CUFF.65190.1"; tss_id "TSS46150"; |          |   |   |   |                                                                         |
| chr3 Cufflinks exon41287501            | 41291883 | . | + | . | gene_id "XLOC_036596"; transcript_id "TCONS_00060925"; exon_number "2"; |
| oId "CUFF.65190.1"; tss_id "TSS46150"; |          |   |   |   |                                                                         |
| chr3 Cufflinks exon42436448            | 42436458 | . | + | . | gene_id "XLOC_036602"; transcript_id "TCONS_00060937"; exon_number "1"; |
| oId "CUFF.65198.1"; tss_id "TSS46160"; |          |   |   |   |                                                                         |
| chr3 Cufflinks exon42667366            | 42667692 | . | + | . | gene_id "XLOC_036602"; transcript_id "TCONS_00060937"; exon_number "2"; |
| oId "CUFF.65198.1"; tss_id "TSS46160"; |          |   |   |   |                                                                         |
| chr3 Cufflinks exon43104165            | 43105453 | . | + | . | gene_id "XLOC_036609"; transcript_id "TCONS_00060954"; exon_number "1"; |
| oId "CUFF.65235.1"; tss_id "TSS46172"; |          |   |   |   |                                                                         |
| chr3 Cufflinks exon43106269            | 43106433 | . | + | . | gene_id "XLOC_036609"; transcript_id "TCONS_00060954"; exon_number "2"; |
| oId "CUFF.65235.1"; tss_id "TSS46172"; |          |   |   |   |                                                                         |
| chr3 Cufflinks exon63989698            | 63991744 | . | + | . | gene_id "XLOC_036862"; transcript_id "TCONS_00061376"; exon_number "1"; |
| oId "CUFF.66133.1"; tss_id "TSS46488"; |          |   |   |   |                                                                         |
| chr3 Cufflinks exon63995373            | 63995429 | . | + | . | gene_id "XLOC_036862"; transcript_id "TCONS_00061376"; exon_number "2"; |
| oId "CUFF.66133.1"; tss_id "TSS46488"; |          |   |   |   |                                                                         |
| chr3 Cufflinks exon63997473            | 63997917 | . | + | . | gene_id "XLOC_036862"; transcript_id "TCONS_00061376"; exon_number "3"; |
| oId "CUFF.66133.1"; tss_id "TSS46488"; |          |   |   |   |                                                                         |
| chr3 Cufflinks exon67705092            | 67705526 | . | + | . | gene_id "XLOC_036869"; transcript_id "TCONS_00061386"; exon_number "1"; |
| oId "CUFF.66179.1"; tss_id "TSS46496"; |          |   |   |   |                                                                         |
| chr3 Cufflinks exon67720240            | 67720333 | . | + | . | gene_id "XLOC_036869"; transcript_id "TCONS_00061386"; exon_number "2"; |
| oId "CUFF.66179.1"; tss_id "TSS46496"; |          |   |   |   |                                                                         |
| chr3 Cufflinks exon67721306            | 67721428 | . | + | . | gene_id "XLOC_036869"; transcript_id "TCONS_00061386"; exon_number "3"; |
| oId "CUFF.66179.1"; tss_id "TSS46496"; |          |   |   |   |                                                                         |
| chr3 Cufflinks exon67724319            | 67724381 | . | + | . | gene_id "XLOC_036869"; transcript_id "TCONS_00061386"; exon_number "4"; |
| oId "CUFF.66179.1"; tss_id "TSS46496"; |          |   |   |   |                                                                         |
| chr3 Cufflinks exon67705096            | 67705526 | . | + | . | gene_id "XLOC_036869"; transcript_id "TCONS_00061387"; exon_number "1"; |
| oId "CUFF.66179.3"; tss_id "TSS46496"; |          |   |   |   |                                                                         |
| chr3 Cufflinks exon67720240            | 67720333 | . | + | . | gene_id "XLOC_036869"; transcript_id "TCONS_00061387"; exon_number "2"; |
| oId "CUFF.66179.3"; tss_id "TSS46496"; |          |   |   |   |                                                                         |
| chr3 Cufflinks exon67721253            | 67721428 | . | + | . | gene_id "XLOC_036869"; transcript_id "TCONS_00061387"; exon_number "3"; |
| oId "CUFF.66179.3"; tss_id "TSS46496"; |          |   |   |   |                                                                         |
| chr3 Cufflinks exon67860324            | 67860427 | . | + | . | gene_id "XLOC_036869"; transcript_id "TCONS_00061387"; exon_number "4"; |
| oId "CUFF.66179.3"; tss_id "TSS46496"; |          |   |   |   |                                                                         |
| chr3 Cufflinks exon67705112            | 67705526 | . | + | . | gene_id "XLOC_036869"; transcript_id "TCONS_00061388"; exon_number "1"; |

oId "CUFF.66179.5"; tss\_id "TSS46496";  
chr3 Cufflinks exon67720240 67720333 . + . gene\_id "XLOC\_036869"; transcript\_id "TCONS\_00061388"; exon\_number "2";  
oId "CUFF.66179.5"; tss\_id "TSS46496";  
chr3 Cufflinks exon67797195 67797381 . + . gene\_id "XLOC\_036869"; transcript\_id "TCONS\_00061388"; exon\_number "3";  
oId "CUFF.66179.5"; tss\_id "TSS46496";  
chr3 Cufflinks exon67818754 67818857 . + . gene\_id "XLOC\_036869"; transcript\_id "TCONS\_00061388"; exon\_number "4";  
oId "CUFF.66179.5"; tss\_id "TSS46496";  
chr3 Cufflinks exon88075331 88075344 . + . gene\_id "XLOC\_036904"; transcript\_id "TCONS\_00061434"; exon\_number "1";  
oId "CUFF.66367.1"; tss\_id "TSS46537";  
chr3 Cufflinks exon88208805 88215729 . + . gene\_id "XLOC\_036904"; transcript\_id "TCONS\_00061434"; exon\_number "2";  
oId "CUFF.66367.1"; tss\_id "TSS46537";  
chr3 Cufflinks exon88213373 88213391 . + . gene\_id "XLOC\_036904"; transcript\_id "TCONS\_00061460"; exon\_number "1";  
oId "CUFF.66367.2"; tss\_id "TSS46538";  
chr3 Cufflinks exon88214001 88215729 . + . gene\_id "XLOC\_036904"; transcript\_id "TCONS\_00061460"; exon\_number "2";  
oId "CUFF.66367.2"; tss\_id "TSS46538";  
chr3 Cufflinks exon101659703 101659869 . + . gene\_id "XLOC\_036980"; transcript\_id "TCONS\_00061548"; exon\_number "1";  
oId "CUFF.66624.2"; tss\_id "TSS46623";  
chr3 Cufflinks exon101713405 101713741 . + . gene\_id "XLOC\_036980"; transcript\_id "TCONS\_00061548"; exon\_number "2";  
oId "CUFF.66624.2"; tss\_id "TSS46623";  
chr3 Cufflinks exon101715325 101716920 . + . gene\_id "XLOC\_036980"; transcript\_id "TCONS\_00061548"; exon\_number "3";  
oId "CUFF.66624.2"; tss\_id "TSS46623";  
chr3 Cufflinks exon101659703 101659869 . + . gene\_id "XLOC\_036980"; transcript\_id "TCONS\_00061547"; exon\_number "1";  
oId "CUFF.66624.1"; tss\_id "TSS46623";  
chr3 Cufflinks exon101679206 101679306 . + . gene\_id "XLOC\_036980"; transcript\_id "TCONS\_00061547"; exon\_number "2";  
oId "CUFF.66624.1"; tss\_id "TSS46623";  
chr3 Cufflinks exon101713405 101713741 . + . gene\_id "XLOC\_036980"; transcript\_id "TCONS\_00061547"; exon\_number "3";  
oId "CUFF.66624.1"; tss\_id "TSS46623";  
chr3 Cufflinks exon101715325 101716920 . + . gene\_id "XLOC\_036980"; transcript\_id "TCONS\_00061547"; exon\_number "4";  
oId "CUFF.66624.1"; tss\_id "TSS46623";  
chr3 Cufflinks exon106959519 106959934 . + . gene\_id "XLOC\_036987"; transcript\_id "TCONS\_00061557"; exon\_number "1";  
oId "CUFF.66651.1"; tss\_id "TSS46631";  
chr3 Cufflinks exon106964855 106967678 . + . gene\_id "XLOC\_036987"; transcript\_id "TCONS\_00061557"; exon\_number "2";  
oId "CUFF.66651.1"; tss\_id "TSS46631";  
chr3 Cufflinks exon106970390 106972046 . + . gene\_id "XLOC\_036987"; transcript\_id "TCONS\_00061557"; exon\_number "3";  
oId "CUFF.66651.1"; tss\_id "TSS46631";  
chr3 Cufflinks exon106959530 106959934 . + . gene\_id "XLOC\_036987"; transcript\_id "TCONS\_00061558"; exon\_number "1";  
oId "CUFF.66651.4"; tss\_id "TSS46631";  
chr3 Cufflinks exon106964855 106964984 . + . gene\_id "XLOC\_036987"; transcript\_id "TCONS\_00061558"; exon\_number "2";  
oId "CUFF.66651.4"; tss\_id "TSS46631";  
chr3 Cufflinks exon106967425 106967678 . + . gene\_id "XLOC\_036987"; transcript\_id "TCONS\_00061558"; exon\_number "3";  
oId "CUFF.66651.4"; tss\_id "TSS46631";  
chr3 Cufflinks exon106970390 106972046 . + . gene\_id "XLOC\_036987"; transcript\_id "TCONS\_00061558"; exon\_number "4";  
oId "CUFF.66651.4"; tss\_id "TSS46631";

|                                        |           |   |   |   |                                                                         |
|----------------------------------------|-----------|---|---|---|-------------------------------------------------------------------------|
| chr3 Cufflinks exon107836163           | 107837017 | . | + | . | gene_id "XLOC_037005"; transcript_id "TCONS_00061580"; exon_number "1"; |
| oId "CUFF.66697.1"; tss_id "TSS46650"; |           |   |   |   |                                                                         |
| chr3 Cufflinks exon107839191           | 107839290 | . | + | . | gene_id "XLOC_037005"; transcript_id "TCONS_00061580"; exon_number "2"; |
| oId "CUFF.66697.1"; tss_id "TSS46650"; |           |   |   |   |                                                                         |
| chr3 Cufflinks exon107839707           | 107840273 | . | + | . | gene_id "XLOC_037005"; transcript_id "TCONS_00061580"; exon_number "3"; |
| oId "CUFF.66697.1"; tss_id "TSS46650"; |           |   |   |   |                                                                         |
| chr3 Cufflinks exon107837293           | 107837361 | . | + | . | gene_id "XLOC_037005"; transcript_id "TCONS_00061582"; exon_number "1"; |
| oId "CUFF.66697.3"; tss_id "TSS46652"; |           |   |   |   |                                                                         |
| chr3 Cufflinks exon107839191           | 107839290 | . | + | . | gene_id "XLOC_037005"; transcript_id "TCONS_00061582"; exon_number "2"; |
| oId "CUFF.66697.3"; tss_id "TSS46652"; |           |   |   |   |                                                                         |
| chr3 Cufflinks exon107839707           | 107839953 | . | + | . | gene_id "XLOC_037005"; transcript_id "TCONS_00061582"; exon_number "3"; |
| oId "CUFF.66697.3"; tss_id "TSS46652"; |           |   |   |   |                                                                         |
| chr3 Cufflinks exon107840344           | 107840573 | . | + | . | gene_id "XLOC_037005"; transcript_id "TCONS_00061582"; exon_number "4"; |
| oId "CUFF.66697.3"; tss_id "TSS46652"; |           |   |   |   |                                                                         |
| chr3 Cufflinks exon107837341           | 107837361 | . | + | . | gene_id "XLOC_037005"; transcript_id "TCONS_00061583"; exon_number "1"; |
| oId "CUFF.66697.4"; tss_id "TSS46652"; |           |   |   |   |                                                                         |
| chr3 Cufflinks exon107839188           | 107839290 | . | + | . | gene_id "XLOC_037005"; transcript_id "TCONS_00061583"; exon_number "2"; |
| oId "CUFF.66697.4"; tss_id "TSS46652"; |           |   |   |   |                                                                         |
| chr3 Cufflinks exon107839707           | 107840273 | . | + | . | gene_id "XLOC_037005"; transcript_id "TCONS_00061583"; exon_number "3"; |
| oId "CUFF.66697.4"; tss_id "TSS46652"; |           |   |   |   |                                                                         |
| chr3 Cufflinks exon107843321           | 107843989 | . | + | . | gene_id "XLOC_037006"; transcript_id "TCONS_00061584"; exon_number "1"; |
| oId "CUFF.66701.2"; tss_id "TSS46653"; |           |   |   |   |                                                                         |
| chr3 Cufflinks exon107852279           | 107861675 | . | + | . | gene_id "XLOC_037006"; transcript_id "TCONS_00061584"; exon_number "2"; |
| oId "CUFF.66701.2"; tss_id "TSS46653"; |           |   |   |   |                                                                         |
| chr3 Cufflinks exon107845629           | 107855853 | . | + | . | gene_id "XLOC_037006"; transcript_id "TCONS_00061585"; exon_number "1"; |
| oId "CUFF.66701.8"; tss_id "TSS46654"; |           |   |   |   |                                                                         |
| chr3 Cufflinks exon107856763           | 107861675 | . | + | . | gene_id "XLOC_037006"; transcript_id "TCONS_00061585"; exon_number "2"; |
| oId "CUFF.66701.8"; tss_id "TSS46654"; |           |   |   |   |                                                                         |
| chr3 Cufflinks exon107850886           | 107854197 | . | + | . | gene_id "XLOC_037006"; transcript_id "TCONS_00061586"; exon_number "1"; |
| oId "CUFF.66701.9"; tss_id "TSS46655"; |           |   |   |   |                                                                         |
| chr3 Cufflinks exon107855161           | 107861675 | . | + | . | gene_id "XLOC_037006"; transcript_id "TCONS_00061586"; exon_number "2"; |
| oId "CUFF.66701.9"; tss_id "TSS46655"; |           |   |   |   |                                                                         |
| chr3 Cufflinks exon112383631           | 112384034 | . | + | . | gene_id "XLOC_037056"; transcript_id "TCONS_00061657"; exon_number "1"; |
| oId "CUFF.66833.2"; tss_id "TSS46711"; |           |   |   |   |                                                                         |
| chr3 Cufflinks exon112628791           | 112628896 | . | + | . | gene_id "XLOC_037056"; transcript_id "TCONS_00061657"; exon_number "2"; |
| oId "CUFF.66833.2"; tss_id "TSS46711"; |           |   |   |   |                                                                         |
| chr3 Cufflinks exon112683938           | 112684115 | . | + | . | gene_id "XLOC_037056"; transcript_id "TCONS_00061657"; exon_number "3"; |
| oId "CUFF.66833.2"; tss_id "TSS46711"; |           |   |   |   |                                                                         |
| chr3 Cufflinks exon112692004           | 112692143 | . | + | . | gene_id "XLOC_037056"; transcript_id "TCONS_00061657"; exon_number "4"; |
| oId "CUFF.66833.2"; tss_id "TSS46711"; |           |   |   |   |                                                                         |
| chr3 Cufflinks exon112693755           | 112696870 | . | + | . | gene_id "XLOC_037056"; transcript_id "TCONS_00061657"; exon_number "5"; |
| oId "CUFF.66833.2"; tss_id "TSS46711"; |           |   |   |   |                                                                         |
| chr3 Cufflinks exon112383631           | 112384034 | . | + | . | gene_id "XLOC_037056"; transcript_id "TCONS_00061656"; exon_number "1"; |

|                                        |   |   |   |                                                                         |  |
|----------------------------------------|---|---|---|-------------------------------------------------------------------------|--|
| oId "CUFF.66833.1"; tss_id "TSS46711"; |   |   |   |                                                                         |  |
| chr3 Cufflinks exon112628791 112628896 | . | + | . | gene_id "XLOC_037056"; transcript_id "TCONS_00061656"; exon_number "2"; |  |
| oId "CUFF.66833.1"; tss_id "TSS46711"; |   |   |   |                                                                         |  |
| chr3 Cufflinks exon112692004 112692143 | . | + | . | gene_id "XLOC_037056"; transcript_id "TCONS_00061656"; exon_number "3"; |  |
| oId "CUFF.66833.1"; tss_id "TSS46711"; |   |   |   |                                                                         |  |
| chr3 Cufflinks exon112693755 112696870 | . | + | . | gene_id "XLOC_037056"; transcript_id "TCONS_00061656"; exon_number "4"; |  |
| oId "CUFF.66833.1"; tss_id "TSS46711"; |   |   |   |                                                                         |  |
| chr3 Cufflinks exon122031973 122032121 | . | + | . | gene_id "XLOC_037133"; transcript_id "TCONS_00061776"; exon_number "1"; |  |
| oId "CUFF.67383.1"; tss_id "TSS46801"; |   |   |   |                                                                         |  |
| chr3 Cufflinks exon122032627 122032792 | . | + | . | gene_id "XLOC_037133"; transcript_id "TCONS_00061776"; exon_number "2"; |  |
| oId "CUFF.67383.1"; tss_id "TSS46801"; |   |   |   |                                                                         |  |
| chr3 Cufflinks exon122033620 122034382 | . | + | . | gene_id "XLOC_037133"; transcript_id "TCONS_00061776"; exon_number "3"; |  |
| oId "CUFF.67383.1"; tss_id "TSS46801"; |   |   |   |                                                                         |  |
| chr3 Cufflinks exon123304175 123304648 | . | + | . | gene_id "XLOC_037160"; transcript_id "TCONS_00061820"; exon_number "1"; |  |
| oId "CUFF.67444.1"; tss_id "TSS46832"; |   |   |   |                                                                         |  |
| chr3 Cufflinks exon123330082 123330202 | . | + | . | gene_id "XLOC_037160"; transcript_id "TCONS_00061820"; exon_number "2"; |  |
| oId "CUFF.67444.1"; tss_id "TSS46832"; |   |   |   |                                                                         |  |
| chr3 Cufflinks exon123331086 123331506 | . | + | . | gene_id "XLOC_037160"; transcript_id "TCONS_00061820"; exon_number "3"; |  |
| oId "CUFF.67444.1"; tss_id "TSS46832"; |   |   |   |                                                                         |  |
| chr3 Cufflinks exon123304360 123304400 | . | + | . | gene_id "XLOC_037160"; transcript_id "TCONS_00061821"; exon_number "1"; |  |
| oId "CUFF.67444.3"; tss_id "TSS46833"; |   |   |   |                                                                         |  |
| chr3 Cufflinks exon123304494 123304648 | . | + | . | gene_id "XLOC_037160"; transcript_id "TCONS_00061821"; exon_number "2"; |  |
| oId "CUFF.67444.3"; tss_id "TSS46833"; |   |   |   |                                                                         |  |
| chr3 Cufflinks exon123348341 123348528 | . | + | . | gene_id "XLOC_037160"; transcript_id "TCONS_00061821"; exon_number "3"; |  |
| oId "CUFF.67444.3"; tss_id "TSS46833"; |   |   |   |                                                                         |  |
| chr3 Cufflinks exon123349343 123349668 | . | + | . | gene_id "XLOC_037160"; transcript_id "TCONS_00061821"; exon_number "4"; |  |
| oId "CUFF.67444.3"; tss_id "TSS46833"; |   |   |   |                                                                         |  |
| chr3 Cufflinks exon123304386 123304400 | . | + | . | gene_id "XLOC_037160"; transcript_id "TCONS_00061822"; exon_number "1"; |  |
| oId "CUFF.67444.4"; tss_id "TSS46833"; |   |   |   |                                                                         |  |
| chr3 Cufflinks exon123304489 123304648 | . | + | . | gene_id "XLOC_037160"; transcript_id "TCONS_00061822"; exon_number "2"; |  |
| oId "CUFF.67444.4"; tss_id "TSS46833"; |   |   |   |                                                                         |  |
| chr3 Cufflinks exon123348338 123348528 | . | + | . | gene_id "XLOC_037160"; transcript_id "TCONS_00061822"; exon_number "3"; |  |
| oId "CUFF.67444.4"; tss_id "TSS46833"; |   |   |   |                                                                         |  |
| chr3 Cufflinks exon123349343 123349668 | . | + | . | gene_id "XLOC_037160"; transcript_id "TCONS_00061822"; exon_number "4"; |  |
| oId "CUFF.67444.4"; tss_id "TSS46833"; |   |   |   |                                                                         |  |
| chr3 Cufflinks exon126941453 126942054 | . | + | . | gene_id "XLOC_037188"; transcript_id "TCONS_00061873"; exon_number "1"; |  |
| oId "CUFF.67597.2"; tss_id "TSS46872"; |   |   |   |                                                                         |  |
| chr3 Cufflinks exon126996565 126997111 | . | + | . | gene_id "XLOC_037188"; transcript_id "TCONS_00061873"; exon_number "2"; |  |
| oId "CUFF.67597.2"; tss_id "TSS46872"; |   |   |   |                                                                         |  |
| chr3 Cufflinks exon126941453 126942054 | . | + | . | gene_id "XLOC_037188"; transcript_id "TCONS_00061872"; exon_number "1"; |  |
| oId "CUFF.67597.1"; tss_id "TSS46872"; |   |   |   |                                                                         |  |
| chr3 Cufflinks exon126995367 126995492 | . | + | . | gene_id "XLOC_037188"; transcript_id "TCONS_00061872"; exon_number "2"; |  |
| oId "CUFF.67597.1"; tss_id "TSS46872"; |   |   |   |                                                                         |  |



|                                        |           |   |   |   |                                                                         |
|----------------------------------------|-----------|---|---|---|-------------------------------------------------------------------------|
| chr3 Cufflinks exon126996565           | 126997111 | . | + | . | gene_id "XLOC_037188"; transcript_id "TCONS_00061872"; exon_number "3"; |
| oId "CUFF.67597.1"; tss_id "TSS46872"; |           |   |   |   |                                                                         |
| chr3 Cufflinks exon128902863           | 128903315 | . | + | . | gene_id "XLOC_037301"; transcript_id "TCONS_00061994"; exon_number "1"; |
| oId "CUFF.67806.2"; tss_id "TSS46988"; |           |   |   |   |                                                                         |
| chr3 Cufflinks exon128914908           | 128916603 | . | + | . | gene_id "XLOC_037301"; transcript_id "TCONS_00061994"; exon_number "2"; |
| oId "CUFF.67806.2"; tss_id "TSS46988"; |           |   |   |   |                                                                         |
| chr3 Cufflinks exon139108645           | 139108775 | . | + | . | gene_id "XLOC_037400"; transcript_id "TCONS_00062160"; exon_number "1"; |
| oId "CUFF.68224.1"; tss_id "TSS47111"; |           |   |   |   |                                                                         |
| chr3 Cufflinks exon139138399           | 139138522 | . | + | . | gene_id "XLOC_037400"; transcript_id "TCONS_00062160"; exon_number "2"; |
| oId "CUFF.68224.1"; tss_id "TSS47111"; |           |   |   |   |                                                                         |
| chr3 Cufflinks exon139141858           | 139141956 | . | + | . | gene_id "XLOC_037400"; transcript_id "TCONS_00062160"; exon_number "3"; |
| oId "CUFF.68224.1"; tss_id "TSS47111"; |           |   |   |   |                                                                         |
| chr3 Cufflinks exon139163136           | 139163797 | . | + | . | gene_id "XLOC_037400"; transcript_id "TCONS_00062160"; exon_number "4"; |
| oId "CUFF.68224.1"; tss_id "TSS47111"; |           |   |   |   |                                                                         |
| chr3 Cufflinks exon139108776           | 139109079 | . | + | . | gene_id "XLOC_037400"; transcript_id "TCONS_00062161"; exon_number "1"; |
| oId "CUFF.68224.2"; tss_id "TSS47112"; |           |   |   |   |                                                                         |
| chr3 Cufflinks exon139138399           | 139138522 | . | + | . | gene_id "XLOC_037400"; transcript_id "TCONS_00062161"; exon_number "2"; |
| oId "CUFF.68224.2"; tss_id "TSS47112"; |           |   |   |   |                                                                         |
| chr3 Cufflinks exon139141858           | 139141956 | . | + | . | gene_id "XLOC_037400"; transcript_id "TCONS_00062161"; exon_number "3"; |
| oId "CUFF.68224.2"; tss_id "TSS47112"; |           |   |   |   |                                                                         |
| chr3 Cufflinks exon139163136           | 139163797 | . | + | . | gene_id "XLOC_037400"; transcript_id "TCONS_00062161"; exon_number "4"; |
| oId "CUFF.68224.2"; tss_id "TSS47112"; |           |   |   |   |                                                                         |
| chr3 Cufflinks exon139108776           | 139109075 | . | + | . | gene_id "XLOC_037400"; transcript_id "TCONS_00062162"; exon_number "1"; |
| oId "CUFF.68224.3"; tss_id "TSS47112"; |           |   |   |   |                                                                         |
| chr3 Cufflinks exon139138399           | 139138522 | . | + | . | gene_id "XLOC_037400"; transcript_id "TCONS_00062162"; exon_number "2"; |
| oId "CUFF.68224.3"; tss_id "TSS47112"; |           |   |   |   |                                                                         |
| chr3 Cufflinks exon139141858           | 139141956 | . | + | . | gene_id "XLOC_037400"; transcript_id "TCONS_00062162"; exon_number "3"; |
| oId "CUFF.68224.3"; tss_id "TSS47112"; |           |   |   |   |                                                                         |
| chr3 Cufflinks exon139163136           | 139163352 | . | + | . | gene_id "XLOC_037400"; transcript_id "TCONS_00062162"; exon_number "4"; |
| oId "CUFF.68224.3"; tss_id "TSS47112"; |           |   |   |   |                                                                         |
| chr3 Cufflinks exon139185211           | 139185230 | . | + | . | gene_id "XLOC_037400"; transcript_id "TCONS_00062162"; exon_number "5"; |
| oId "CUFF.68224.3"; tss_id "TSS47112"; |           |   |   |   |                                                                         |
| chr3 Cufflinks exon150421299           | 150421454 | . | + | . | gene_id "XLOC_037517"; transcript_id "TCONS_00062321"; exon_number "1"; |
| oId "CUFF.68572.2"; tss_id "TSS47242"; |           |   |   |   |                                                                         |
| chr3 Cufflinks exon150425719           | 150425796 | . | + | . | gene_id "XLOC_037517"; transcript_id "TCONS_00062321"; exon_number "2"; |
| oId "CUFF.68572.2"; tss_id "TSS47242"; |           |   |   |   |                                                                         |
| chr3 Cufflinks exon150437656           | 150439226 | . | + | . | gene_id "XLOC_037517"; transcript_id "TCONS_00062321"; exon_number "3"; |
| oId "CUFF.68572.2"; tss_id "TSS47242"; |           |   |   |   |                                                                         |
| chr3 Cufflinks exon152186728           | 152193660 | . | + | . | gene_id "XLOC_037538"; transcript_id "TCONS_00062355"; exon_number "1"; |
| oId "CUFF.68614.2"; tss_id "TSS47269"; |           |   |   |   |                                                                         |
| chr3 Cufflinks exon152204264           | 152204352 | . | + | . | gene_id "XLOC_037538"; transcript_id "TCONS_00062355"; exon_number "2"; |
| oId "CUFF.68614.2"; tss_id "TSS47269"; |           |   |   |   |                                                                         |
| chr3 Cufflinks exon155705074           | 155705749 | . | + | . | gene_id "XLOC_037553"; transcript_id "TCONS_00062379"; exon_number "1"; |

oId "CUFF.68690.1"; tss\_id "TSS47288";  
chr3 Cufflinks exon155705942 155706842 . + . gene\_id "XLOC\_037553"; transcript\_id "TCONS\_00062379"; exon\_number "2";  
oId "CUFF.68690.1"; tss\_id "TSS47288";  
chr3 Cufflinks exon156886447 156886922 . + . gene\_id "XLOC\_037568"; transcript\_id "TCONS\_00062403"; exon\_number "1";  
oId "CUFF.68737.3"; tss\_id "TSS47305";  
chr3 Cufflinks exon156892133 156892344 . + . gene\_id "XLOC\_037568"; transcript\_id "TCONS\_00062403"; exon\_number "2";  
oId "CUFF.68737.3"; tss\_id "TSS47305";  
chr3 Cufflinks exon156892538 156893178 . + . gene\_id "XLOC\_037568"; transcript\_id "TCONS\_00062403"; exon\_number "3";  
oId "CUFF.68737.3"; tss\_id "TSS47305";  
chr3 Cufflinks exon156957379 156957588 . + . gene\_id "XLOC\_037568"; transcript\_id "TCONS\_00062403"; exon\_number "4";  
oId "CUFF.68737.3"; tss\_id "TSS47305";  
chr3 Cufflinks exon157001013 157001645 . + . gene\_id "XLOC\_037568"; transcript\_id "TCONS\_00062403"; exon\_number "5";  
oId "CUFF.68737.3"; tss\_id "TSS47305";  
chr3 Cufflinks exon156886447 156886922 . + . gene\_id "XLOC\_037568"; transcript\_id "TCONS\_00062404"; exon\_number "1";  
oId "CUFF.68737.2"; tss\_id "TSS47305";  
chr3 Cufflinks exon156892133 156892346 . + . gene\_id "XLOC\_037568"; transcript\_id "TCONS\_00062404"; exon\_number "2";  
oId "CUFF.68737.2"; tss\_id "TSS47305";  
chr3 Cufflinks exon156892599 156893179 . + . gene\_id "XLOC\_037568"; transcript\_id "TCONS\_00062404"; exon\_number "3";  
oId "CUFF.68737.2"; tss\_id "TSS47305";  
chr3 Cufflinks exon156957379 156957588 . + . gene\_id "XLOC\_037568"; transcript\_id "TCONS\_00062404"; exon\_number "4";  
oId "CUFF.68737.2"; tss\_id "TSS47305";  
chr3 Cufflinks exon157051027 157051152 . + . gene\_id "XLOC\_037568"; transcript\_id "TCONS\_00062404"; exon\_number "5";  
oId "CUFF.68737.2"; tss\_id "TSS47305";  
chr3 Cufflinks exon157098903 157099138 . + . gene\_id "XLOC\_037568"; transcript\_id "TCONS\_00062404"; exon\_number "6";  
oId "CUFF.68737.2"; tss\_id "TSS47305";  
chr3 Cufflinks exon157108335 157108891 . + . gene\_id "XLOC\_037568"; transcript\_id "TCONS\_00062404"; exon\_number "7";  
oId "CUFF.68737.2"; tss\_id "TSS47305";  
chr3 Cufflinks exon156892876 156893178 . + . gene\_id "XLOC\_037568"; transcript\_id "TCONS\_00062408"; exon\_number "1";  
oId "CUFF.68737.5"; tss\_id "TSS47306";  
chr3 Cufflinks exon156893407 156895222 . + . gene\_id "XLOC\_037568"; transcript\_id "TCONS\_00062408"; exon\_number "2";  
oId "CUFF.68737.5"; tss\_id "TSS47306";  
chr3 Cufflinks exon156955823 156955896 . + . gene\_id "XLOC\_037568"; transcript\_id "TCONS\_00062412"; exon\_number "1";  
oId "CUFF.68737.6"; tss\_id "TSS47307";  
chr3 Cufflinks exon156957379 156957588 . + . gene\_id "XLOC\_037568"; transcript\_id "TCONS\_00062412"; exon\_number "2";  
oId "CUFF.68737.6"; tss\_id "TSS47307";  
chr3 Cufflinks exon157033600 157033717 . + . gene\_id "XLOC\_037568"; transcript\_id "TCONS\_00062412"; exon\_number "3";  
oId "CUFF.68737.6"; tss\_id "TSS47307";  
chr3 Cufflinks exon165877832 165878006 . + . gene\_id "XLOC\_037633"; transcript\_id "TCONS\_00062504"; exon\_number "1";  
oId "CUFF.68993.1"; tss\_id "TSS47389";  
chr3 Cufflinks exon165887992 165888337 . + . gene\_id "XLOC\_037633"; transcript\_id "TCONS\_00062504"; exon\_number "2";  
oId "CUFF.68993.1"; tss\_id "TSS47389";  
chr3 Cufflinks exon165877832 165878006 . + . gene\_id "XLOC\_037633"; transcript\_id "TCONS\_00062505"; exon\_number "1";  
oId "CUFF.68993.2"; tss\_id "TSS47389";

|                                        |           |   |   |   |                                                                         |
|----------------------------------------|-----------|---|---|---|-------------------------------------------------------------------------|
| chr3 Cufflinks exon165908306           | 165908430 | . | + | . | gene_id "XLOC_037633"; transcript_id "TCONS_00062505"; exon_number "2"; |
| oId "CUFF.68993.2"; tss_id "TSS47389"; |           |   |   |   |                                                                         |
| chr3 Cufflinks exon165909973           | 165910350 | . | + | . | gene_id "XLOC_037633"; transcript_id "TCONS_00062505"; exon_number "3"; |
| oId "CUFF.68993.2"; tss_id "TSS47389"; |           |   |   |   |                                                                         |
| chr3 Cufflinks exon171178318           | 171179146 | . | + | . | gene_id "XLOC_037659"; transcript_id "TCONS_00062551"; exon_number "1"; |
| oId "CUFF.69066.1"; tss_id "TSS47425"; |           |   |   |   |                                                                         |
| chr3 Cufflinks exon171185873           | 171186044 | . | + | . | gene_id "XLOC_037659"; transcript_id "TCONS_00062551"; exon_number "2"; |
| oId "CUFF.69066.1"; tss_id "TSS47425"; |           |   |   |   |                                                                         |
| chr3 Cufflinks exon171186505           | 171186629 | . | + | . | gene_id "XLOC_037659"; transcript_id "TCONS_00062551"; exon_number "3"; |
| oId "CUFF.69066.1"; tss_id "TSS47425"; |           |   |   |   |                                                                         |
| chr3 Cufflinks exon177364613           | 177364856 | . | + | . | gene_id "XLOC_037690"; transcript_id "TCONS_00062595"; exon_number "1"; |
| oId "CUFF.69151.1"; tss_id "TSS47462"; |           |   |   |   |                                                                         |
| chr3 Cufflinks exon177369323           | 177369418 | . | + | . | gene_id "XLOC_037690"; transcript_id "TCONS_00062595"; exon_number "2"; |
| oId "CUFF.69151.1"; tss_id "TSS47462"; |           |   |   |   |                                                                         |
| chr3 Cufflinks exon177372254           | 177372357 | . | + | . | gene_id "XLOC_037690"; transcript_id "TCONS_00062595"; exon_number "3"; |
| oId "CUFF.69151.1"; tss_id "TSS47462"; |           |   |   |   |                                                                         |
| chr3 Cufflinks exon177401415           | 177402802 | . | + | . | gene_id "XLOC_037690"; transcript_id "TCONS_00062595"; exon_number "4"; |
| oId "CUFF.69151.1"; tss_id "TSS47462"; |           |   |   |   |                                                                         |
| chr3 Cufflinks exon177405187           | 177405376 | . | + | . | gene_id "XLOC_037690"; transcript_id "TCONS_00062595"; exon_number "5"; |
| oId "CUFF.69151.1"; tss_id "TSS47462"; |           |   |   |   |                                                                         |
| chr3 Cufflinks exon177408917           | 177409024 | . | + | . | gene_id "XLOC_037690"; transcript_id "TCONS_00062595"; exon_number "6"; |
| oId "CUFF.69151.1"; tss_id "TSS47462"; |           |   |   |   |                                                                         |
| chr3 Cufflinks exon177364613           | 177364856 | . | + | . | gene_id "XLOC_037690"; transcript_id "TCONS_00062596"; exon_number "1"; |
| oId "CUFF.69151.2"; tss_id "TSS47462"; |           |   |   |   |                                                                         |
| chr3 Cufflinks exon177369323           | 177369418 | . | + | . | gene_id "XLOC_037690"; transcript_id "TCONS_00062596"; exon_number "2"; |
| oId "CUFF.69151.2"; tss_id "TSS47462"; |           |   |   |   |                                                                         |
| chr3 Cufflinks exon177401415           | 177402802 | . | + | . | gene_id "XLOC_037690"; transcript_id "TCONS_00062596"; exon_number "3"; |
| oId "CUFF.69151.2"; tss_id "TSS47462"; |           |   |   |   |                                                                         |
| chr3 Cufflinks exon177405190           | 177405376 | . | + | . | gene_id "XLOC_037690"; transcript_id "TCONS_00062596"; exon_number "4"; |
| oId "CUFF.69151.2"; tss_id "TSS47462"; |           |   |   |   |                                                                         |
| chr3 Cufflinks exon177469699           | 177472907 | . | + | . | gene_id "XLOC_037690"; transcript_id "TCONS_00062596"; exon_number "5"; |
| oId "CUFF.69151.2"; tss_id "TSS47462"; |           |   |   |   |                                                                         |
| chr3 Cufflinks exon177398684           | 177398904 | . | + | . | gene_id "XLOC_037690"; transcript_id "TCONS_00062603"; exon_number "1"; |
| oId "CUFF.69151.3"; tss_id "TSS47463"; |           |   |   |   |                                                                         |
| chr3 Cufflinks exon177399008           | 177401621 | . | + | . | gene_id "XLOC_037690"; transcript_id "TCONS_00062603"; exon_number "2"; |
| oId "CUFF.69151.3"; tss_id "TSS47463"; |           |   |   |   |                                                                         |
| chr3 Cufflinks exon177402732           | 177402802 | . | + | . | gene_id "XLOC_037690"; transcript_id "TCONS_00062603"; exon_number "3"; |
| oId "CUFF.69151.3"; tss_id "TSS47463"; |           |   |   |   |                                                                         |
| chr3 Cufflinks exon177404102           | 177404129 | . | + | . | gene_id "XLOC_037690"; transcript_id "TCONS_00062603"; exon_number "4"; |
| oId "CUFF.69151.3"; tss_id "TSS47463"; |           |   |   |   |                                                                         |
| chr3 Cufflinks exon177405190           | 177405376 | . | + | . | gene_id "XLOC_037690"; transcript_id "TCONS_00062603"; exon_number "5"; |
| oId "CUFF.69151.3"; tss_id "TSS47463"; |           |   |   |   |                                                                         |
| chr3 Cufflinks exon177469699           | 177472907 | . | + | . | gene_id "XLOC_037690"; transcript_id "TCONS_00062603"; exon_number "6"; |

oId "CUFF.69151.3"; tss\_id "TSS47463";  
chr3 Cufflinks exon179674301 179674648 . + . gene\_id "XLOC\_037712"; transcript\_id "TCONS\_00062627"; exon\_number "1";  
oId "CUFF.69237.1"; tss\_id "TSS47489";  
chr3 Cufflinks exon179697349 179697473 . + . gene\_id "XLOC\_037712"; transcript\_id "TCONS\_00062627"; exon\_number "2";  
oId "CUFF.69237.1"; tss\_id "TSS47489";  
chr3 Cufflinks exon179828395 179828458 . + . gene\_id "XLOC\_037712"; transcript\_id "TCONS\_00062627"; exon\_number "3";  
oId "CUFF.69237.1"; tss\_id "TSS47489";  
chr3 Cufflinks exon179829184 179829920 . + . gene\_id "XLOC\_037712"; transcript\_id "TCONS\_00062627"; exon\_number "4";  
oId "CUFF.69237.1"; tss\_id "TSS47489";  
chr3 Cufflinks exon179674446 179674648 . + . gene\_id "XLOC\_037712"; transcript\_id "TCONS\_00062629"; exon\_number "1";  
oId "CUFF.69237.3"; tss\_id "TSS47490";  
chr3 Cufflinks exon179697349 179697473 . + . gene\_id "XLOC\_037712"; transcript\_id "TCONS\_00062629"; exon\_number "2";  
oId "CUFF.69237.3"; tss\_id "TSS47490";  
chr3 Cufflinks exon179826078 179826166 . + . gene\_id "XLOC\_037712"; transcript\_id "TCONS\_00062629"; exon\_number "3";  
oId "CUFF.69237.3"; tss\_id "TSS47490";  
chr3 Cufflinks exon179828395 179828611 . + . gene\_id "XLOC\_037712"; transcript\_id "TCONS\_00062629"; exon\_number "4";  
oId "CUFF.69237.3"; tss\_id "TSS47490";  
chr3 Cufflinks exon179674446 179674648 . + . gene\_id "XLOC\_037712"; transcript\_id "TCONS\_00062630"; exon\_number "1";  
oId "CUFF.69237.2"; tss\_id "TSS47490";  
chr3 Cufflinks exon179697349 179697473 . + . gene\_id "XLOC\_037712"; transcript\_id "TCONS\_00062630"; exon\_number "2";  
oId "CUFF.69237.2"; tss\_id "TSS47490";  
chr3 Cufflinks exon179826078 179826266 . + . gene\_id "XLOC\_037712"; transcript\_id "TCONS\_00062630"; exon\_number "3";  
oId "CUFF.69237.2"; tss\_id "TSS47490";  
chr3 Cufflinks exon179828395 179828458 . + . gene\_id "XLOC\_037712"; transcript\_id "TCONS\_00062630"; exon\_number "4";  
oId "CUFF.69237.2"; tss\_id "TSS47490";  
chr3 Cufflinks exon179829184 179829920 . + . gene\_id "XLOC\_037712"; transcript\_id "TCONS\_00062630"; exon\_number "5";  
oId "CUFF.69237.2"; tss\_id "TSS47490";  
chr3 Cufflinks exon179674506 179674648 . + . gene\_id "XLOC\_037712"; transcript\_id "TCONS\_00062631"; exon\_number "1";  
oId "CUFF.69237.5"; tss\_id "TSS47490";  
chr3 Cufflinks exon179826078 179826266 . + . gene\_id "XLOC\_037712"; transcript\_id "TCONS\_00062631"; exon\_number "2";  
oId "CUFF.69237.5"; tss\_id "TSS47490";  
chr3 Cufflinks exon179828395 179828611 . + . gene\_id "XLOC\_037712"; transcript\_id "TCONS\_00062631"; exon\_number "3";  
oId "CUFF.69237.5"; tss\_id "TSS47490";  
chr3 Cufflinks exon179674522 179674648 . + . gene\_id "XLOC\_037712"; transcript\_id "TCONS\_00062632"; exon\_number "1";  
oId "CUFF.69237.6"; tss\_id "TSS47490";  
chr3 Cufflinks exon179828395 179828458 . + . gene\_id "XLOC\_037712"; transcript\_id "TCONS\_00062632"; exon\_number "2";  
oId "CUFF.69237.6"; tss\_id "TSS47490";  
chr3 Cufflinks exon179829184 179829920 . + . gene\_id "XLOC\_037712"; transcript\_id "TCONS\_00062632"; exon\_number "3";  
oId "CUFF.69237.6"; tss\_id "TSS47490";  
chr3 Cufflinks exon179674541 179674648 . + . gene\_id "XLOC\_037712"; transcript\_id "TCONS\_00062633"; exon\_number "1";  
oId "CUFF.69237.7"; tss\_id "TSS47490";  
chr3 Cufflinks exon179826078 179826267 . + . gene\_id "XLOC\_037712"; transcript\_id "TCONS\_00062633"; exon\_number "2";  
oId "CUFF.69237.7"; tss\_id "TSS47490";

|                                        |           |   |   |   |                                                                         |
|----------------------------------------|-----------|---|---|---|-------------------------------------------------------------------------|
| chr3 Cufflinks exon179828395           | 179828458 | . | + | . | gene_id "XLOC_037712"; transcript_id "TCONS_00062633"; exon_number "3"; |
| oId "CUFF.69237.7"; tss_id "TSS47490"; |           |   |   |   |                                                                         |
| chr3 Cufflinks exon179829184           | 179829920 | . | + | . | gene_id "XLOC_037712"; transcript_id "TCONS_00062633"; exon_number "4"; |
| oId "CUFF.69237.7"; tss_id "TSS47490"; |           |   |   |   |                                                                         |
| chr3 Cufflinks exon179687533           | 179687637 | . | + | . | gene_id "XLOC_037712"; transcript_id "TCONS_00062634"; exon_number "1"; |
| oId "CUFF.69237.8"; tss_id "TSS47491"; |           |   |   |   |                                                                         |
| chr3 Cufflinks exon179697349           | 179697473 | . | + | . | gene_id "XLOC_037712"; transcript_id "TCONS_00062634"; exon_number "2"; |
| oId "CUFF.69237.8"; tss_id "TSS47491"; |           |   |   |   |                                                                         |
| chr3 Cufflinks exon179828395           | 179828458 | . | + | . | gene_id "XLOC_037712"; transcript_id "TCONS_00062634"; exon_number "3"; |
| oId "CUFF.69237.8"; tss_id "TSS47491"; |           |   |   |   |                                                                         |
| chr3 Cufflinks exon179829184           | 179829920 | . | + | . | gene_id "XLOC_037712"; transcript_id "TCONS_00062634"; exon_number "4"; |
| oId "CUFF.69237.8"; tss_id "TSS47491"; |           |   |   |   |                                                                         |
| chr3 Cufflinks exon181963005           | 181963212 | . | + | . | gene_id "XLOC_037724"; transcript_id "TCONS_00062657"; exon_number "1"; |
| oId "CUFF.69268.1"; tss_id "TSS47506"; |           |   |   |   |                                                                         |
| chr3 Cufflinks exon182018732           | 182019526 | . | + | . | gene_id "XLOC_037724"; transcript_id "TCONS_00062657"; exon_number "2"; |
| oId "CUFF.69268.1"; tss_id "TSS47506"; |           |   |   |   |                                                                         |
| chr3 Cufflinks exon182042448           | 182043698 | . | + | . | gene_id "XLOC_037724"; transcript_id "TCONS_00062657"; exon_number "3"; |
| oId "CUFF.69268.1"; tss_id "TSS47506"; |           |   |   |   |                                                                         |
| chr3 Cufflinks exon181963005           | 181963212 | . | + | . | gene_id "XLOC_037724"; transcript_id "TCONS_00062658"; exon_number "1"; |
| oId "CUFF.69268.2"; tss_id "TSS47506"; |           |   |   |   |                                                                         |
| chr3 Cufflinks exon182018732           | 182018966 | . | + | . | gene_id "XLOC_037724"; transcript_id "TCONS_00062658"; exon_number "2"; |
| oId "CUFF.69268.2"; tss_id "TSS47506"; |           |   |   |   |                                                                         |
| chr3 Cufflinks exon182082494           | 182083766 | . | + | . | gene_id "XLOC_037724"; transcript_id "TCONS_00062658"; exon_number "3"; |
| oId "CUFF.69268.2"; tss_id "TSS47506"; |           |   |   |   |                                                                         |
| chr3 Cufflinks exon184433555           | 184433962 | . | + | . | gene_id "XLOC_037770"; transcript_id "TCONS_00062732"; exon_number "1"; |
| oId "CUFF.69382.2"; tss_id "TSS47565"; |           |   |   |   |                                                                         |
| chr3 Cufflinks exon184443891           | 184443987 | . | + | . | gene_id "XLOC_037770"; transcript_id "TCONS_00062732"; exon_number "2"; |
| oId "CUFF.69382.2"; tss_id "TSS47565"; |           |   |   |   |                                                                         |
| chr3 Cufflinks exon184433555           | 184433962 | . | + | . | gene_id "XLOC_037770"; transcript_id "TCONS_00062733"; exon_number "1"; |
| oId "CUFF.69382.1"; tss_id "TSS47565"; |           |   |   |   |                                                                         |
| chr3 Cufflinks exon184451823           | 184452028 | . | + | . | gene_id "XLOC_037770"; transcript_id "TCONS_00062733"; exon_number "2"; |
| oId "CUFF.69382.1"; tss_id "TSS47565"; |           |   |   |   |                                                                         |
| chr3 Cufflinks exon184455340           | 184455559 | . | + | . | gene_id "XLOC_037770"; transcript_id "TCONS_00062733"; exon_number "3"; |
| oId "CUFF.69382.1"; tss_id "TSS47565"; |           |   |   |   |                                                                         |
| chr3 Cufflinks exon184456423           | 184458179 | . | + | . | gene_id "XLOC_037770"; transcript_id "TCONS_00062733"; exon_number "4"; |
| oId "CUFF.69382.1"; tss_id "TSS47565"; |           |   |   |   |                                                                         |
| chr3 Cufflinks exon184433644           | 184433962 | . | + | . | gene_id "XLOC_037770"; transcript_id "TCONS_00062734"; exon_number "1"; |
| oId "CUFF.69382.3"; tss_id "TSS47565"; |           |   |   |   |                                                                         |
| chr3 Cufflinks exon184451823           | 184451888 | . | + | . | gene_id "XLOC_037770"; transcript_id "TCONS_00062734"; exon_number "2"; |
| oId "CUFF.69382.3"; tss_id "TSS47565"; |           |   |   |   |                                                                         |
| chr3 Cufflinks exon184455340           | 184455559 | . | + | . | gene_id "XLOC_037770"; transcript_id "TCONS_00062734"; exon_number "3"; |
| oId "CUFF.69382.3"; tss_id "TSS47565"; |           |   |   |   |                                                                         |
| chr3 Cufflinks exon184456423           | 184458179 | . | + | . | gene_id "XLOC_037770"; transcript_id "TCONS_00062734"; exon_number "4"; |

oId "CUFF.69382.3"; tss\_id "TSS47565";  
chr3 Cufflinks exon185216945 185217326 . + . gene\_id "XLOC\_037776"; transcript\_id "TCONS\_00062743"; exon\_number "1";  
oId "CUFF.69401.1"; tss\_id "TSS47573";  
chr3 Cufflinks exon185229636 185229731 . + . gene\_id "XLOC\_037776"; transcript\_id "TCONS\_00062743"; exon\_number "2";  
oId "CUFF.69401.1"; tss\_id "TSS47573";  
chr3 Cufflinks exon185216951 185216999 . + . gene\_id "XLOC\_037776"; transcript\_id "TCONS\_00062744"; exon\_number "1";  
oId "CUFF.69401.2"; tss\_id "TSS47573";  
chr3 Cufflinks exon185217354 185217558 . + . gene\_id "XLOC\_037776"; transcript\_id "TCONS\_00062744"; exon\_number "2";  
oId "CUFF.69401.2"; tss\_id "TSS47573";  
chr3 Cufflinks exon185217732 185222825 . + . gene\_id "XLOC\_037776"; transcript\_id "TCONS\_00062744"; exon\_number "3";  
oId "CUFF.69401.2"; tss\_id "TSS47573";  
chr3 Cufflinks exon187612354 187619642 . + . gene\_id "XLOC\_037791"; transcript\_id "TCONS\_00062769"; exon\_number "1";  
oId "CUFF.69490.1"; tss\_id "TSS47594";  
chr3 Cufflinks exon187619743 187620761 . + . gene\_id "XLOC\_037791"; transcript\_id "TCONS\_00062769"; exon\_number "2";  
oId "CUFF.69490.1"; tss\_id "TSS47594";  
chr3 Cufflinks exon193921434 193921634 . + . gene\_id "XLOC\_037854"; transcript\_id "TCONS\_00062856"; exon\_number "1";  
oId "CUFF.69606.1"; tss\_id "TSS47671";  
chr3 Cufflinks exon193922611 193928073 . + . gene\_id "XLOC\_037854"; transcript\_id "TCONS\_00062856"; exon\_number "2";  
oId "CUFF.69606.1"; tss\_id "TSS47671";  
chr3 Cufflinks exon193965437 193965610 . + . gene\_id "XLOC\_037856"; transcript\_id "TCONS\_00062860"; exon\_number "1";  
oId "CUFF.69611.2"; tss\_id "TSS47674";  
chr3 Cufflinks exon193967385 193967691 . + . gene\_id "XLOC\_037856"; transcript\_id "TCONS\_00062860"; exon\_number "2";  
oId "CUFF.69611.2"; tss\_id "TSS47674";  
chr3 Cufflinks exon193973020 193973145 . + . gene\_id "XLOC\_037856"; transcript\_id "TCONS\_00062860"; exon\_number "3";  
oId "CUFF.69611.2"; tss\_id "TSS47674";  
chr3 Cufflinks exon193974974 193976654 . + . gene\_id "XLOC\_037856"; transcript\_id "TCONS\_00062860"; exon\_number "4";  
oId "CUFF.69611.2"; tss\_id "TSS47674";  
chr3 Cufflinks exon193965437 193965610 . + . gene\_id "XLOC\_037856"; transcript\_id "TCONS\_00062859"; exon\_number "1";  
oId "CUFF.69611.1"; tss\_id "TSS47674";  
chr3 Cufflinks exon193967385 193967691 . + . gene\_id "XLOC\_037856"; transcript\_id "TCONS\_00062859"; exon\_number "2";  
oId "CUFF.69611.1"; tss\_id "TSS47674";  
chr3 Cufflinks exon193973020 193976654 . + . gene\_id "XLOC\_037856"; transcript\_id "TCONS\_00062859"; exon\_number "3";  
oId "CUFF.69611.1"; tss\_id "TSS47674";  
chr3 Cufflinks exon193974012 193974335 . + . gene\_id "XLOC\_037856"; transcript\_id "TCONS\_00062861"; exon\_number "1";  
oId "CUFF.69611.3"; tss\_id "TSS47675";  
chr3 Cufflinks exon193974882 193976654 . + . gene\_id "XLOC\_037856"; transcript\_id "TCONS\_00062861"; exon\_number "2";  
oId "CUFF.69611.3"; tss\_id "TSS47675";  
chr3 Cufflinks exon194018048 194018320 . + . gene\_id "XLOC\_037857"; transcript\_id "TCONS\_00062863"; exon\_number "1";  
oId "CUFF.69622.2"; tss\_id "TSS47676";  
chr3 Cufflinks exon194021523 194021816 . + . gene\_id "XLOC\_037857"; transcript\_id "TCONS\_00062863"; exon\_number "2";  
oId "CUFF.69622.2"; tss\_id "TSS47676";  
chr3 Cufflinks exon194022169 194024859 . + . gene\_id "XLOC\_037857"; transcript\_id "TCONS\_00062863"; exon\_number "3";  
oId "CUFF.69622.2"; tss\_id "TSS47676";

|                                        |           |   |   |   |                                                                         |
|----------------------------------------|-----------|---|---|---|-------------------------------------------------------------------------|
| chr3 Cufflinks exon194018048           | 194018320 | . | + | . | gene_id "XLOC_037857"; transcript_id "TCONS_00062862"; exon_number "1"; |
| oId "CUFF.69622.1"; tss_id "TSS47676"; |           |   |   |   |                                                                         |
| chr3 Cufflinks exon194021521           | 194021652 | . | + | . | gene_id "XLOC_037857"; transcript_id "TCONS_00062862"; exon_number "2"; |
| oId "CUFF.69622.1"; tss_id "TSS47676"; |           |   |   |   |                                                                         |
| chr3 Cufflinks exon194022172           | 194024859 | . | + | . | gene_id "XLOC_037857"; transcript_id "TCONS_00062862"; exon_number "3"; |
| oId "CUFF.69622.1"; tss_id "TSS47676"; |           |   |   |   |                                                                         |
| chr3 Cufflinks exon194018058           | 194018335 | . | + | . | gene_id "XLOC_037857"; transcript_id "TCONS_00062867"; exon_number "1"; |
| oId "CUFF.69622.6"; tss_id "TSS47676"; |           |   |   |   |                                                                         |
| chr3 Cufflinks exon194019079           | 194019176 | . | + | . | gene_id "XLOC_037857"; transcript_id "TCONS_00062867"; exon_number "2"; |
| oId "CUFF.69622.6"; tss_id "TSS47676"; |           |   |   |   |                                                                         |
| chr3 Cufflinks exon194021523           | 194021816 | . | + | . | gene_id "XLOC_037857"; transcript_id "TCONS_00062867"; exon_number "3"; |
| oId "CUFF.69622.6"; tss_id "TSS47676"; |           |   |   |   |                                                                         |
| chr3 Cufflinks exon194022169           | 194024859 | . | + | . | gene_id "XLOC_037857"; transcript_id "TCONS_00062867"; exon_number "4"; |
| oId "CUFF.69622.6"; tss_id "TSS47676"; |           |   |   |   |                                                                         |
| chr3 Cufflinks exon194018058           | 194018320 | . | + | . | gene_id "XLOC_037857"; transcript_id "TCONS_00062866"; exon_number "1"; |
| oId "CUFF.69622.5"; tss_id "TSS47676"; |           |   |   |   |                                                                         |
| chr3 Cufflinks exon194019079           | 194019176 | . | + | . | gene_id "XLOC_037857"; transcript_id "TCONS_00062866"; exon_number "2"; |
| oId "CUFF.69622.5"; tss_id "TSS47676"; |           |   |   |   |                                                                         |
| chr3 Cufflinks exon194021523           | 194021652 | . | + | . | gene_id "XLOC_037857"; transcript_id "TCONS_00062866"; exon_number "3"; |
| oId "CUFF.69622.5"; tss_id "TSS47676"; |           |   |   |   |                                                                         |
| chr3 Cufflinks exon194022172           | 194024859 | . | + | . | gene_id "XLOC_037857"; transcript_id "TCONS_00062866"; exon_number "4"; |
| oId "CUFF.69622.5"; tss_id "TSS47676"; |           |   |   |   |                                                                         |
| chr3 Cufflinks exon194018058           | 194018335 | . | + | . | gene_id "XLOC_037857"; transcript_id "TCONS_00062865"; exon_number "1"; |
| oId "CUFF.69622.4"; tss_id "TSS47676"; |           |   |   |   |                                                                         |
| chr3 Cufflinks exon194021523           | 194021652 | . | + | . | gene_id "XLOC_037857"; transcript_id "TCONS_00062865"; exon_number "2"; |
| oId "CUFF.69622.4"; tss_id "TSS47676"; |           |   |   |   |                                                                         |
| chr3 Cufflinks exon194022172           | 194024859 | . | + | . | gene_id "XLOC_037857"; transcript_id "TCONS_00062865"; exon_number "3"; |
| oId "CUFF.69622.4"; tss_id "TSS47676"; |           |   |   |   |                                                                         |
| chr3 Cufflinks exon194018058           | 194018320 | . | + | . | gene_id "XLOC_037857"; transcript_id "TCONS_00062864"; exon_number "1"; |
| oId "CUFF.69622.3"; tss_id "TSS47676"; |           |   |   |   |                                                                         |
| chr3 Cufflinks exon194021523           | 194021816 | . | + | . | gene_id "XLOC_037857"; transcript_id "TCONS_00062864"; exon_number "2"; |
| oId "CUFF.69622.3"; tss_id "TSS47676"; |           |   |   |   |                                                                         |
| chr3 Cufflinks exon194022172           | 194024859 | . | + | . | gene_id "XLOC_037857"; transcript_id "TCONS_00062864"; exon_number "3"; |
| oId "CUFF.69622.3"; tss_id "TSS47676"; |           |   |   |   |                                                                         |
| chr3 Cufflinks exon194304997           | 194305177 | . | + | . | gene_id "XLOC_037864"; transcript_id "TCONS_00062876"; exon_number "1"; |
| oId "CUFF.69650.3"; tss_id "TSS47683"; |           |   |   |   |                                                                         |
| chr3 Cufflinks exon194309754           | 194309871 | . | + | . | gene_id "XLOC_037864"; transcript_id "TCONS_00062876"; exon_number "2"; |
| oId "CUFF.69650.3"; tss_id "TSS47683"; |           |   |   |   |                                                                         |
| chr3 Cufflinks exon194310584           | 194311561 | . | + | . | gene_id "XLOC_037864"; transcript_id "TCONS_00062876"; exon_number "3"; |
| oId "CUFF.69650.3"; tss_id "TSS47683"; |           |   |   |   |                                                                         |
| chr3 Cufflinks exon194304997           | 194305177 | . | + | . | gene_id "XLOC_037864"; transcript_id "TCONS_00062875"; exon_number "1"; |
| oId "CUFF.69650.2"; tss_id "TSS47683"; |           |   |   |   |                                                                         |
| chr3 Cufflinks exon194309754           | 194309871 | . | + | . | gene_id "XLOC_037864"; transcript_id "TCONS_00062875"; exon_number "2"; |

oId "CUFF.69650.2"; tss\_id "TSS47683";  
chr3 Cufflinks exon194310203 194310355 . + . gene\_id "XLOC\_037864"; transcript\_id "TCONS\_00062875"; exon\_number "3";  
oId "CUFF.69650.2"; tss\_id "TSS47683";  
chr3 Cufflinks exon194310584 194311561 . + . gene\_id "XLOC\_037864"; transcript\_id "TCONS\_00062875"; exon\_number "4";  
oId "CUFF.69650.2"; tss\_id "TSS47683";  
chr3 Cufflinks exon194304997 194305177 . + . gene\_id "XLOC\_037864"; transcript\_id "TCONS\_00062874"; exon\_number "1";  
oId "CUFF.69650.1"; tss\_id "TSS47683";  
chr3 Cufflinks exon194309750 194309871 . + . gene\_id "XLOC\_037864"; transcript\_id "TCONS\_00062874"; exon\_number "2";  
oId "CUFF.69650.1"; tss\_id "TSS47683";  
chr3 Cufflinks exon194310203 194310355 . + . gene\_id "XLOC\_037864"; transcript\_id "TCONS\_00062874"; exon\_number "3";  
oId "CUFF.69650.1"; tss\_id "TSS47683";  
chr3 Cufflinks exon194310584 194311561 . + . gene\_id "XLOC\_037864"; transcript\_id "TCONS\_00062874"; exon\_number "4";  
oId "CUFF.69650.1"; tss\_id "TSS47683";  
chr3 Cufflinks exon195416883 195417517 . + . gene\_id "XLOC\_037882"; transcript\_id "TCONS\_00062905"; exon\_number "1";  
oId "CUFF.69698.9"; tss\_id "TSS47706";  
chr3 Cufflinks exon195521341 195521354 . + . gene\_id "XLOC\_037882"; transcript\_id "TCONS\_00062905"; exon\_number "2";  
oId "CUFF.69698.9"; tss\_id "TSS47706";  
chr3 Cufflinks exon195869507 195869871 . + . gene\_id "XLOC\_037892"; transcript\_id "TCONS\_00062919"; exon\_number "1";  
oId "CUFF.69777.2"; tss\_id "TSS47716";  
chr3 Cufflinks exon195871048 195871248 . + . gene\_id "XLOC\_037892"; transcript\_id "TCONS\_00062919"; exon\_number "2";  
oId "CUFF.69777.2"; tss\_id "TSS47716";  
chr3 Cufflinks exon195886771 195886865 . + . gene\_id "XLOC\_037892"; transcript\_id "TCONS\_00062919"; exon\_number "3";  
oId "CUFF.69777.2"; tss\_id "TSS47716";  
chr3 Cufflinks exon195887022 195887761 . + . gene\_id "XLOC\_037892"; transcript\_id "TCONS\_00062919"; exon\_number "4";  
oId "CUFF.69777.2"; tss\_id "TSS47716";  
chr3 Cufflinks exon195869507 195869871 . + . gene\_id "XLOC\_037892"; transcript\_id "TCONS\_00062918"; exon\_number "1";  
oId "CUFF.69777.1"; tss\_id "TSS47716";  
chr3 Cufflinks exon195870777 195871248 . + . gene\_id "XLOC\_037892"; transcript\_id "TCONS\_00062918"; exon\_number "2";  
oId "CUFF.69777.1"; tss\_id "TSS47716";  
chr3 Cufflinks exon195886771 195887761 . + . gene\_id "XLOC\_037892"; transcript\_id "TCONS\_00062918"; exon\_number "3";  
oId "CUFF.69777.1"; tss\_id "TSS47716";  
chr3 Cufflinks exon196359439 196360481 . + . gene\_id "XLOC\_037900"; transcript\_id "TCONS\_00062928"; exon\_number "1";  
oId "CUFF.69860.1"; tss\_id "TSS47725";  
chr3 Cufflinks exon196360984 196361498 . + . gene\_id "XLOC\_037900"; transcript\_id "TCONS\_00062928"; exon\_number "2";  
oId "CUFF.69860.1"; tss\_id "TSS47725";  
chr3 Cufflinks exon196391041 196391071 . + . gene\_id "XLOC\_037903"; transcript\_id "TCONS\_00062932"; exon\_number "1";  
oId "CUFF.69869.1"; tss\_id "TSS47729";  
chr3 Cufflinks exon196391840 196392436 . + . gene\_id "XLOC\_037903"; transcript\_id "TCONS\_00062932"; exon\_number "2";  
oId "CUFF.69869.1"; tss\_id "TSS47729";  
chr3 Cufflinks exon196695811 196697346 . + . gene\_id "XLOC\_037916"; transcript\_id "TCONS\_00062946"; exon\_number "1";  
oId "CUFF.69910.6"; tss\_id "TSS47742";  
chr3 Cufflinks exon196700055 196700211 . + . gene\_id "XLOC\_037916"; transcript\_id "TCONS\_00062946"; exon\_number "2";  
oId "CUFF.69910.6"; tss\_id "TSS47742";



chr3 Cufflinks exon196700436 196700694 . + . gene\_id "XLOC\_037916"; transcript\_id "TCONS\_00062946"; exon\_number "3";  
oId "CUFF.69910.6"; tss\_id "TSS47742";  
chr3 Cufflinks exon196703768 196704075 . + . gene\_id "XLOC\_037916"; transcript\_id "TCONS\_00062946"; exon\_number "4";  
oId "CUFF.69910.6"; tss\_id "TSS47742";  
chr3 Cufflinks exon196705109 196705472 . + . gene\_id "XLOC\_037916"; transcript\_id "TCONS\_00062946"; exon\_number "5";  
oId "CUFF.69910.6"; tss\_id "TSS47742";  
chr3 Cufflinks exon2139131 2139642 . - . gene\_id "XLOC\_037941"; transcript\_id "TCONS\_00062983"; exon\_number "1"; oId  
"CUFF.63857.1"; tss\_id "TSS47771";  
chr3 Cufflinks exon2140221 2140351 . - . gene\_id "XLOC\_037941"; transcript\_id "TCONS\_00062983"; exon\_number "2"; oId  
"CUFF.63857.1"; tss\_id "TSS47771";  
chr3 Cufflinks exon3586053 3586063 . - . gene\_id "XLOC\_037946"; transcript\_id "TCONS\_00062994"; exon\_number "1"; oId  
"CUFF.63866.1"; tss\_id "TSS47776";  
chr3 Cufflinks exon3588981 3589038 . - . gene\_id "XLOC\_037946"; transcript\_id "TCONS\_00062994"; exon\_number "2"; oId  
"CUFF.63866.1"; tss\_id "TSS47776";  
chr3 Cufflinks exon3819409 3819487 . - . gene\_id "XLOC\_037946"; transcript\_id "TCONS\_00062994"; exon\_number "3"; oId  
"CUFF.63866.1"; tss\_id "TSS47776";  
chr3 Cufflinks exon3820925 3821006 . - . gene\_id "XLOC\_037946"; transcript\_id "TCONS\_00062994"; exon\_number "4"; oId  
"CUFF.63866.1"; tss\_id "TSS47776";  
chr3 Cufflinks exon3824187 3824385 . - . gene\_id "XLOC\_037946"; transcript\_id "TCONS\_00062994"; exon\_number "5"; oId  
"CUFF.63866.1"; tss\_id "TSS47776";  
chr3 Cufflinks exon3830598 3830758 . - . gene\_id "XLOC\_037946"; transcript\_id "TCONS\_00062994"; exon\_number "6"; oId  
"CUFF.63866.1"; tss\_id "TSS47776";  
chr3 Cufflinks exon3864418 3864581 . - . gene\_id "XLOC\_037946"; transcript\_id "TCONS\_00062994"; exon\_number "7"; oId  
"CUFF.63866.1"; tss\_id "TSS47776";  
chr3 Cufflinks exon3868926 3869193 . - . gene\_id "XLOC\_037946"; transcript\_id "TCONS\_00062994"; exon\_number "8"; oId  
"CUFF.63866.1"; tss\_id "TSS47776";  
chr3 Cufflinks exon3968110 3968731 . - . gene\_id "XLOC\_037946"; transcript\_id "TCONS\_00062994"; exon\_number "9"; oId  
"CUFF.63866.1"; tss\_id "TSS47776";  
chr3 Cufflinks exon4110253 4110739 . - . gene\_id "XLOC\_037946"; transcript\_id "TCONS\_00062994"; exon\_number "10"; oId  
"CUFF.63866.1"; tss\_id "TSS47776";  
chr3 Cufflinks exon3668450 3668533 . - . gene\_id "XLOC\_037946"; transcript\_id "TCONS\_00062996"; exon\_number "1"; oId  
"CUFF.63866.3"; tss\_id "TSS47777";  
chr3 Cufflinks exon3819409 3819487 . - . gene\_id "XLOC\_037946"; transcript\_id "TCONS\_00062996"; exon\_number "2"; oId  
"CUFF.63866.3"; tss\_id "TSS47777";  
chr3 Cufflinks exon3820925 3821006 . - . gene\_id "XLOC\_037946"; transcript\_id "TCONS\_00062996"; exon\_number "3"; oId  
"CUFF.63866.3"; tss\_id "TSS47777";  
chr3 Cufflinks exon3824187 3824332 . - . gene\_id "XLOC\_037946"; transcript\_id "TCONS\_00062996"; exon\_number "4"; oId  
"CUFF.63866.3"; tss\_id "TSS47777";  
chr3 Cufflinks exon3830598 3831112 . - . gene\_id "XLOC\_037946"; transcript\_id "TCONS\_00062996"; exon\_number "5"; oId  
"CUFF.63866.3"; tss\_id "TSS47777";  
chr3 Cufflinks exon3668450 3668533 . - . gene\_id "XLOC\_037946"; transcript\_id "TCONS\_00062995"; exon\_number "1"; oId  
"CUFF.63866.2"; tss\_id "TSS47777";  
chr3 Cufflinks exon3819409 3819487 . - . gene\_id "XLOC\_037946"; transcript\_id "TCONS\_00062995"; exon\_number "2"; oId

"CUFF.63866.2"; tss\_id "TSS47777";  
chr3 Cufflinks exon3820925 3821014 . - . gene\_id "XLOC\_037946"; transcript\_id "TCONS\_00062995"; exon\_number "3"; oId  
"CUFF.63866.2"; tss\_id "TSS47777";  
chr3 Cufflinks exon3824195 3824385 . - . gene\_id "XLOC\_037946"; transcript\_id "TCONS\_00062995"; exon\_number "4"; oId  
"CUFF.63866.2"; tss\_id "TSS47777";  
chr3 Cufflinks exon3830598 3831112 . - . gene\_id "XLOC\_037946"; transcript\_id "TCONS\_00062995"; exon\_number "5"; oId  
"CUFF.63866.2"; tss\_id "TSS47777";  
chr3 Cufflinks exon3743589 3744145 . - . gene\_id "XLOC\_037946"; transcript\_id "TCONS\_00062997"; exon\_number "1"; oId  
"CUFF.63866.5"; tss\_id "TSS47778";  
chr3 Cufflinks exon3819409 3819487 . - . gene\_id "XLOC\_037946"; transcript\_id "TCONS\_00062997"; exon\_number "2"; oId  
"CUFF.63866.5"; tss\_id "TSS47778";  
chr3 Cufflinks exon3820925 3821006 . - . gene\_id "XLOC\_037946"; transcript\_id "TCONS\_00062997"; exon\_number "3"; oId  
"CUFF.63866.5"; tss\_id "TSS47778";  
chr3 Cufflinks exon3830598 3830758 . - . gene\_id "XLOC\_037946"; transcript\_id "TCONS\_00062997"; exon\_number "4"; oId  
"CUFF.63866.5"; tss\_id "TSS47778";  
chr3 Cufflinks exon3864418 3864581 . - . gene\_id "XLOC\_037946"; transcript\_id "TCONS\_00062997"; exon\_number "5"; oId  
"CUFF.63866.5"; tss\_id "TSS47778";  
chr3 Cufflinks exon3918402 3918519 . - . gene\_id "XLOC\_037946"; transcript\_id "TCONS\_00062997"; exon\_number "6"; oId  
"CUFF.63866.5"; tss\_id "TSS47778";  
chr3 Cufflinks exon3956684 3956704 . - . gene\_id "XLOC\_037946"; transcript\_id "TCONS\_00062997"; exon\_number "7"; oId  
"CUFF.63866.5"; tss\_id "TSS47778";  
chr3 Cufflinks exon3743589 3744145 . - . gene\_id "XLOC\_037946"; transcript\_id "TCONS\_00062998"; exon\_number "1"; oId  
"CUFF.63866.4"; tss\_id "TSS47779";  
chr3 Cufflinks exon3819409 3819487 . - . gene\_id "XLOC\_037946"; transcript\_id "TCONS\_00062998"; exon\_number "2"; oId  
"CUFF.63866.4"; tss\_id "TSS47779";  
chr3 Cufflinks exon3820925 3821006 . - . gene\_id "XLOC\_037946"; transcript\_id "TCONS\_00062998"; exon\_number "3"; oId  
"CUFF.63866.4"; tss\_id "TSS47779";  
chr3 Cufflinks exon3864418 3864581 . - . gene\_id "XLOC\_037946"; transcript\_id "TCONS\_00062998"; exon\_number "4"; oId  
"CUFF.63866.4"; tss\_id "TSS47779";  
chr3 Cufflinks exon3868926 3869193 . - . gene\_id "XLOC\_037946"; transcript\_id "TCONS\_00062998"; exon\_number "5"; oId  
"CUFF.63866.4"; tss\_id "TSS47779";  
chr3 Cufflinks exon3968110 3968150 . - . gene\_id "XLOC\_037946"; transcript\_id "TCONS\_00062998"; exon\_number "6"; oId  
"CUFF.63866.4"; tss\_id "TSS47779";  
chr3 Cufflinks exon4003309 4003383 . - . gene\_id "XLOC\_037946"; transcript\_id "TCONS\_00062998"; exon\_number "7"; oId  
"CUFF.63866.4"; tss\_id "TSS47779";  
chr3 Cufflinks exon4004742 4005122 . - . gene\_id "XLOC\_037946"; transcript\_id "TCONS\_00062998"; exon\_number "8"; oId  
"CUFF.63866.4"; tss\_id "TSS47779";  
chr3 Cufflinks exon3824257 3824385 . - . gene\_id "XLOC\_037946"; transcript\_id "TCONS\_00063000"; exon\_number "1"; oId  
"CUFF.63866.6"; tss\_id "TSS47780";  
chr3 Cufflinks exon3830598 3830758 . - . gene\_id "XLOC\_037946"; transcript\_id "TCONS\_00063000"; exon\_number "2"; oId  
"CUFF.63866.6"; tss\_id "TSS47780";  
chr3 Cufflinks exon3864418 3864581 . - . gene\_id "XLOC\_037946"; transcript\_id "TCONS\_00063000"; exon\_number "3"; oId  
"CUFF.63866.6"; tss\_id "TSS47780";

chr3 Cufflinks exon3868926 3869193 . - . gene\_id "XLOC\_037946"; transcript\_id "TCONS\_00063000"; exon\_number "4"; oId  
"CUFF.63866.6"; tss\_id "TSS47780";  
chr3 Cufflinks exon3918402 3918519 . - . gene\_id "XLOC\_037946"; transcript\_id "TCONS\_00063000"; exon\_number "5"; oId  
"CUFF.63866.6"; tss\_id "TSS47780";  
chr3 Cufflinks exon3956684 3956801 . - . gene\_id "XLOC\_037946"; transcript\_id "TCONS\_00063000"; exon\_number "6"; oId  
"CUFF.63866.6"; tss\_id "TSS47780";  
chr3 Cufflinks exon3997846 3997914 . - . gene\_id "XLOC\_037946"; transcript\_id "TCONS\_00063000"; exon\_number "7"; oId  
"CUFF.63866.6"; tss\_id "TSS47780";  
chr3 Cufflinks exon4003309 4003353 . - . gene\_id "XLOC\_037946"; transcript\_id "TCONS\_00063000"; exon\_number "8"; oId  
"CUFF.63866.6"; tss\_id "TSS47780";  
chr3 Cufflinks exon3837014 3837112 . - . gene\_id "XLOC\_037946"; transcript\_id "TCONS\_00063001"; exon\_number "1"; oId  
"CUFF.63866.7"; tss\_id "TSS47781";  
chr3 Cufflinks exon3840111 3840384 . - . gene\_id "XLOC\_037946"; transcript\_id "TCONS\_00063001"; exon\_number "2"; oId  
"CUFF.63866.7"; tss\_id "TSS47781";  
chr3 Cufflinks exon3837014 3837112 . - . gene\_id "XLOC\_037946"; transcript\_id "TCONS\_00063002"; exon\_number "1"; oId  
"CUFF.63866.8"; tss\_id "TSS47780";  
chr3 Cufflinks exon3864418 3864581 . - . gene\_id "XLOC\_037946"; transcript\_id "TCONS\_00063002"; exon\_number "2"; oId  
"CUFF.63866.8"; tss\_id "TSS47780";  
chr3 Cufflinks exon3868926 3869193 . - . gene\_id "XLOC\_037946"; transcript\_id "TCONS\_00063002"; exon\_number "3"; oId  
"CUFF.63866.8"; tss\_id "TSS47780";  
chr3 Cufflinks exon3900756 3900889 . - . gene\_id "XLOC\_037946"; transcript\_id "TCONS\_00063002"; exon\_number "4"; oId  
"CUFF.63866.8"; tss\_id "TSS47780";  
chr3 Cufflinks exon3918402 3918519 . - . gene\_id "XLOC\_037946"; transcript\_id "TCONS\_00063002"; exon\_number "5"; oId  
"CUFF.63866.8"; tss\_id "TSS47780";  
chr3 Cufflinks exon4003309 4003334 . - . gene\_id "XLOC\_037946"; transcript\_id "TCONS\_00063002"; exon\_number "6"; oId  
"CUFF.63866.8"; tss\_id "TSS47780";  
chr3 Cufflinks exon3843209 3843320 . - . gene\_id "XLOC\_037946"; transcript\_id "TCONS\_00063004"; exon\_number "1"; oId  
"CUFF.63866.10"; tss\_id "TSS47783";  
chr3 Cufflinks exon3864418 3864581 . - . gene\_id "XLOC\_037946"; transcript\_id "TCONS\_00063004"; exon\_number "2"; oId  
"CUFF.63866.10"; tss\_id "TSS47783";  
chr3 Cufflinks exon3868926 3869193 . - . gene\_id "XLOC\_037946"; transcript\_id "TCONS\_00063004"; exon\_number "3"; oId  
"CUFF.63866.10"; tss\_id "TSS47783";  
chr3 Cufflinks exon3900756 3900904 . - . gene\_id "XLOC\_037946"; transcript\_id "TCONS\_00063004"; exon\_number "4"; oId  
"CUFF.63866.10"; tss\_id "TSS47783";  
chr3 Cufflinks exon3864286 3864581 . - . gene\_id "XLOC\_037946"; transcript\_id "TCONS\_00063006"; exon\_number "1"; oId  
"CUFF.63866.11"; tss\_id "TSS47784";  
chr3 Cufflinks exon3868926 3869193 . - . gene\_id "XLOC\_037946"; transcript\_id "TCONS\_00063006"; exon\_number "2"; oId  
"CUFF.63866.11"; tss\_id "TSS47784";  
chr3 Cufflinks exon3918402 3918519 . - . gene\_id "XLOC\_037946"; transcript\_id "TCONS\_00063006"; exon\_number "3"; oId  
"CUFF.63866.11"; tss\_id "TSS47784";  
chr3 Cufflinks exon4110253 4110531 . - . gene\_id "XLOC\_037946"; transcript\_id "TCONS\_00063006"; exon\_number "4"; oId  
"CUFF.63866.11"; tss\_id "TSS47784";  
chr3 Cufflinks exon3868926 3869193 . - . gene\_id "XLOC\_037946"; transcript\_id "TCONS\_00063007"; exon\_number "1"; oId

"CUFF.63866.12"; tss\_id "TSS47785";  
chr3 Cufflinks exon3918402 3918519 . - . gene\_id "XLOC\_037946"; transcript\_id "TCONS\_00063007"; exon\_number "2"; oId  
"CUFF.63866.12"; tss\_id "TSS47785";  
chr3 Cufflinks exon3956684 3956801 . - . gene\_id "XLOC\_037946"; transcript\_id "TCONS\_00063007"; exon\_number "3"; oId  
"CUFF.63866.12"; tss\_id "TSS47785";  
chr3 Cufflinks exon3960371 3960714 . - . gene\_id "XLOC\_037946"; transcript\_id "TCONS\_00063007"; exon\_number "4"; oId  
"CUFF.63866.12"; tss\_id "TSS47785";  
chr3 Cufflinks exon8824013 8826962 . - . gene\_id "XLOC\_038002"; transcript\_id "TCONS\_00063071"; exon\_number "1"; oId  
"CUFF.64099.1"; tss\_id "TSS47845";  
chr3 Cufflinks exon8881881 8881981 . - . gene\_id "XLOC\_038002"; transcript\_id "TCONS\_00063071"; exon\_number "2"; oId  
"CUFF.64099.1"; tss\_id "TSS47845";  
chr3 Cufflinks exon 8883056 8888217 . - . gene\_id "XLOC\_038002"; transcript\_id "TCONS\_00063071"; exon\_number "3"; oId  
"CUFF.64099.1"; tss\_id "TSS47845";  
chr3 Cufflinks exon 9391701 9391750 . - . gene\_id "XLOC\_038013"; transcript\_id "TCONS\_00063091"; exon\_number "1"; oId  
"CUFF.64127.12"; tss\_id "TSS47858";  
chr3 Cufflinks exon 9404524 9404704 . - . gene\_id "XLOC\_038013"; transcript\_id "TCONS\_00063091"; exon\_number "2"; oId  
"CUFF.64127.12"; tss\_id "TSS47858";  
chr3 Cufflinks exon 9422440 9427607 . - . gene\_id "XLOC\_038015"; transcript\_id "TCONS\_00063093"; exon\_number "1"; oId  
"CUFF.64135.2"; tss\_id "TSS47860";  
chr3 Cufflinks exon 9429771 9429811 . - . gene\_id "XLOC\_038015"; transcript\_id "TCONS\_00063093"; exon\_number "2"; oId  
"CUFF.64135.2"; tss\_id "TSS47860";  
chr3 Cufflinks exon 9431974 9433510 . - . gene\_id "XLOC\_038015"; transcript\_id "TCONS\_00063093"; exon\_number "3"; oId  
"CUFF.64135.2"; tss\_id "TSS47860";  
chr3 Cufflinks exon 9437190 9437263 . - . gene\_id "XLOC\_038015"; transcript\_id "TCONS\_00063093"; exon\_number "4"; oId  
"CUFF.64135.2"; tss\_id "TSS47860";  
chr3 Cufflinks exon 9439108 9439178 . - . gene\_id "XLOC\_038015"; transcript\_id "TCONS\_00063093"; exon\_number "5"; oId  
"CUFF.64135.2"; tss\_id "TSS47860";  
chr3 Cufflinks exon 13518488 13518585 . - . gene\_id "XLOC\_038073"; transcript\_id "TCONS\_00063185";  
exon\_number "1"; oId "CUFF.64333.1"; tss\_id "TSS47935";  
chr3 Cufflinks exon 13521143 13521553 . - . gene\_id "XLOC\_038073"; transcript\_id "TCONS\_00063185";  
exon\_number "2"; oId "CUFF.64333.1"; tss\_id "TSS47935";  
chr3 Cufflinks exon 14437840 14437880 . - . gene\_id "XLOC\_038079"; transcript\_id "TCONS\_00063193";  
exon\_number "1"; oId "CUFF.64379.4"; tss\_id "TSS47942";  
chr3 Cufflinks exon 14438409 14438553 . - . gene\_id "XLOC\_038079"; transcript\_id "TCONS\_00063193";  
exon\_number "2"; oId "CUFF.64379.4"; tss\_id "TSS47942";  
chr3 Cufflinks exon 14439829 14440737 . - . gene\_id "XLOC\_038079"; transcript\_id "TCONS\_00063193";  
exon\_number "3"; oId "CUFF.64379.4"; tss\_id "TSS47942";  
chr3 Cufflinks exon 14442161 14443951 . - . gene\_id "XLOC\_038079"; transcript\_id "TCONS\_00063193";  
exon\_number "4"; oId "CUFF.64379.4"; tss\_id "TSS47942";  
chr3 Cufflinks exon 14438909 14440737 . - . gene\_id "XLOC\_038079"; transcript\_id "TCONS\_00063194";  
exon\_number "1"; oId "CUFF.64379.6"; tss\_id "TSS47942";  
chr3 Cufflinks exon 14442161 14443951 . - . gene\_id "XLOC\_038079"; transcript\_id "TCONS\_00063194";  
exon\_number "2"; oId "CUFF.64379.6"; tss\_id "TSS47942";

chr3 Cufflinks exon 14438909 14440737 . - . gene\_id "XLOC\_038079"; transcript\_id "TCONS\_00063197";  
exon\_number "1"; oId "CUFF.64379.8"; tss\_id "TSS47942";

chr3 Cufflinks exon 14442437 14443998 . - . gene\_id "XLOC\_038079"; transcript\_id "TCONS\_00063197";  
exon\_number "2"; oId "CUFF.64379.8"; tss\_id "TSS47942";

chr3 Cufflinks exon 14438909 14440009 . - . gene\_id "XLOC\_038079"; transcript\_id "TCONS\_00063196"; exon\_number  
"1"; oId "CUFF.64379.7"; tss\_id "TSS47942";

chr3 Cufflinks exon 14440644 14440744 . - . gene\_id "XLOC\_038079"; transcript\_id "TCONS\_00063196"; exon\_number "2";  
oId "CUFF.64379.7"; tss\_id "TSS47942";

chr3 Cufflinks exon 14442437 14443998 . - . gene\_id "XLOC\_038079"; transcript\_id "TCONS\_00063196"; exon\_number "3";  
oId "CUFF.64379.7"; tss\_id "TSS47942";

chr3 Cufflinks exon 14984286 14987661 . - . gene\_id "XLOC\_038088"; transcript\_id "TCONS\_00063209"; exon\_number "1";  
oId "CUFF.64409.2"; tss\_id "TSS47953";

chr3 Cufflinks exon 14988594 14989012 . - . gene\_id "XLOC\_038088"; transcript\_id "TCONS\_00063209"; exon\_number "2";  
oId "CUFF.64409.2"; tss\_id "TSS47953";

chr3 Cufflinks exon 15897792 15897999 . - . gene\_id "XLOC\_038112"; transcript\_id "TCONS\_00063264"; exon\_number "1";  
oId "CUFF.64470.1"; tss\_id "TSS47995";

chr3 Cufflinks exon 16115507 16115520 . - . gene\_id "XLOC\_038112"; transcript\_id "TCONS\_00063264"; exon\_number "2";  
oId "CUFF.64470.1"; tss\_id "TSS47995";

chr3 Cufflinks exon 17782465 17782780 . - . gene\_id "XLOC\_038122"; transcript\_id "TCONS\_00063287"; exon\_number "1";  
oId "CUFF.64516.1"; tss\_id "TSS48011";

chr3 Cufflinks exon 18067371 18067388 . - . gene\_id "XLOC\_038122"; transcript\_id "TCONS\_00063287"; exon\_number "2";  
oId "CUFF.64516.1"; tss\_id "TSS48011";

chr3 Cufflinks exon 31114480 31114500 . - . gene\_id "XLOC\_038169"; transcript\_id "TCONS\_00063379"; exon\_number "1";  
oId "CUFF.64786.1"; tss\_id "TSS48072";

chr3 Cufflinks exon 31120342 31120541 . - . gene\_id "XLOC\_038169"; transcript\_id "TCONS\_00063379"; exon\_number "2";  
oId "CUFF.64786.1"; tss\_id "TSS48072";

chr3 Cufflinks exon 31243434 31243477 . - . gene\_id "XLOC\_038169"; transcript\_id "TCONS\_00063379"; exon\_number "3";  
oId "CUFF.64786.1"; tss\_id "TSS48072";

chr3 Cufflinks exon 31243976 31244159 . - . gene\_id "XLOC\_038169"; transcript\_id "TCONS\_00063379"; exon\_number "4";  
oId "CUFF.64786.1"; tss\_id "TSS48072";

chr3 Cufflinks exon 31247499 31247595 . - . gene\_id "XLOC\_038169"; transcript\_id "TCONS\_00063379"; exon\_number "5";  
oId "CUFF.64786.1"; tss\_id "TSS48072";

chr3 Cufflinks exon 31296287 31299163 . - . gene\_id "XLOC\_038169"; transcript\_id "TCONS\_00063379"; exon\_number "6";  
oId "CUFF.64786.1"; tss\_id "TSS48072";

chr3 Cufflinks exon 31242869 31243234 . - . gene\_id "XLOC\_038169"; transcript\_id "TCONS\_00063380"; exon\_number "1";  
oId "CUFF.64786.4"; tss\_id "TSS48073";

chr3 Cufflinks exon 31243434 31243477 . - . gene\_id "XLOC\_038169"; transcript\_id "TCONS\_00063380"; exon\_number "2";  
oId "CUFF.64786.4"; tss\_id "TSS48073";

chr3 Cufflinks exon 31243976 31244617 . - . gene\_id "XLOC\_038169"; transcript\_id "TCONS\_00063380"; exon\_number "3";  
oId "CUFF.64786.4"; tss\_id "TSS48073";

chr3 Cufflinks exon 31242869 31243232 . - . gene\_id "XLOC\_038169"; transcript\_id "TCONS\_00063381"; exon\_number "1";  
oId "CUFF.64786.5"; tss\_id "TSS48074";

chr3 Cufflinks exon 31243434 31243477 . - . gene\_id "XLOC\_038169"; transcript\_id "TCONS\_00063381"; exon\_number "2";

|                                        |          |   |   |   |                                                                         |
|----------------------------------------|----------|---|---|---|-------------------------------------------------------------------------|
| oId "CUFF.64786.5"; tss_id "TSS48074"; |          |   |   |   |                                                                         |
| chr3 Cufflinks exon31244006            | 31244159 | . | - | . | gene_id "XLOC_038169"; transcript_id "TCONS_00063381"; exon_number "3"; |
| oId "CUFF.64786.5"; tss_id "TSS48074"; |          |   |   |   |                                                                         |
| chr3 Cufflinks exon31247499            | 31247631 | . | - | . | gene_id "XLOC_038169"; transcript_id "TCONS_00063381"; exon_number "4"; |
| oId "CUFF.64786.5"; tss_id "TSS48074"; |          |   |   |   |                                                                         |
| chr3 Cufflinks exon31242869            | 31243232 | . | - | . | gene_id "XLOC_038169"; transcript_id "TCONS_00063382"; exon_number "1"; |
| oId "CUFF.64786.2"; tss_id "TSS48075"; |          |   |   |   |                                                                         |
| chr3 Cufflinks exon31243434            | 31243477 | . | - | . | gene_id "XLOC_038169"; transcript_id "TCONS_00063382"; exon_number "2"; |
| oId "CUFF.64786.2"; tss_id "TSS48075"; |          |   |   |   |                                                                         |
| chr3 Cufflinks exon31243976            | 31244159 | . | - | . | gene_id "XLOC_038169"; transcript_id "TCONS_00063382"; exon_number "3"; |
| oId "CUFF.64786.2"; tss_id "TSS48075"; |          |   |   |   |                                                                         |
| chr3 Cufflinks exon31247499            | 31247595 | . | - | . | gene_id "XLOC_038169"; transcript_id "TCONS_00063382"; exon_number "4"; |
| oId "CUFF.64786.2"; tss_id "TSS48075"; |          |   |   |   |                                                                         |
| chr3 Cufflinks exon31267815            | 31267827 | . | - | . | gene_id "XLOC_038169"; transcript_id "TCONS_00063382"; exon_number "5"; |
| oId "CUFF.64786.2"; tss_id "TSS48075"; |          |   |   |   |                                                                         |
| chr3 Cufflinks exon31242869            | 31243234 | . | - | . | gene_id "XLOC_038169"; transcript_id "TCONS_00063383"; exon_number "1"; |
| oId "CUFF.64786.3"; tss_id "TSS48076"; |          |   |   |   |                                                                         |
| chr3 Cufflinks exon31243434            | 31243477 | . | - | . | gene_id "XLOC_038169"; transcript_id "TCONS_00063383"; exon_number "2"; |
| oId "CUFF.64786.3"; tss_id "TSS48076"; |          |   |   |   |                                                                         |
| chr3 Cufflinks exon31243976            | 31244159 | . | - | . | gene_id "XLOC_038169"; transcript_id "TCONS_00063383"; exon_number "3"; |
| oId "CUFF.64786.3"; tss_id "TSS48076"; |          |   |   |   |                                                                         |
| chr3 Cufflinks exon31247499            | 31247595 | . | - | . | gene_id "XLOC_038169"; transcript_id "TCONS_00063383"; exon_number "4"; |
| oId "CUFF.64786.3"; tss_id "TSS48076"; |          |   |   |   |                                                                         |
| chr3 Cufflinks exon31267815            | 31267993 | . | - | . | gene_id "XLOC_038169"; transcript_id "TCONS_00063383"; exon_number "5"; |
| oId "CUFF.64786.3"; tss_id "TSS48076"; |          |   |   |   |                                                                         |
| chr3 Cufflinks exon31260194            | 31261135 | . | - | . | gene_id "XLOC_038169"; transcript_id "TCONS_00063388"; exon_number "1"; |
| oId "CUFF.64786.7"; tss_id "TSS48076"; |          |   |   |   |                                                                         |
| chr3 Cufflinks exon31267146            | 31267209 | . | - | . | gene_id "XLOC_038169"; transcript_id "TCONS_00063388"; exon_number "2"; |
| oId "CUFF.64786.7"; tss_id "TSS48076"; |          |   |   |   |                                                                         |
| chr3 Cufflinks exon31267815            | 31268007 | . | - | . | gene_id "XLOC_038169"; transcript_id "TCONS_00063388"; exon_number "3"; |
| oId "CUFF.64786.7"; tss_id "TSS48076"; |          |   |   |   |                                                                         |
| chr3 Cufflinks exon31260194            | 31261135 | . | - | . | gene_id "XLOC_038169"; transcript_id "TCONS_00063389"; exon_number "1"; |
| oId "CUFF.64786.8"; tss_id "TSS48078"; |          |   |   |   |                                                                         |
| chr3 Cufflinks exon31267146            | 31268798 | . | - | . | gene_id "XLOC_038169"; transcript_id "TCONS_00063389"; exon_number "2"; |
| oId "CUFF.64786.8"; tss_id "TSS48078"; |          |   |   |   |                                                                         |
| chr3 Cufflinks exon37795180            | 37795543 | . | - | . | gene_id "XLOC_038214"; transcript_id "TCONS_00063467"; exon_number "1"; |
| oId "CUFF.65016.1"; tss_id "TSS48136"; |          |   |   |   |                                                                         |
| chr3 Cufflinks exon37862505            | 37862591 | . | - | . | gene_id "XLOC_038214"; transcript_id "TCONS_00063467"; exon_number "2"; |
| oId "CUFF.65016.1"; tss_id "TSS48136"; |          |   |   |   |                                                                         |
| chr3 Cufflinks exon37876170            | 37876258 | . | - | . | gene_id "XLOC_038214"; transcript_id "TCONS_00063467"; exon_number "3"; |
| oId "CUFF.65016.1"; tss_id "TSS48136"; |          |   |   |   |                                                                         |
| chr3 Cufflinks exon37903192            | 37903271 | . | - | . | gene_id "XLOC_038214"; transcript_id "TCONS_00063467"; exon_number "4"; |
| oId "CUFF.65016.1"; tss_id "TSS48136"; |          |   |   |   |                                                                         |

|                                        |          |   |   |   |                                                                         |
|----------------------------------------|----------|---|---|---|-------------------------------------------------------------------------|
| chr3 Cufflinks exon37829436            | 37831696 | . | - | . | gene_id "XLOC_038214"; transcript_id "TCONS_00063470"; exon_number "1"; |
| oId "CUFF.65016.4"; tss_id "TSS48136"; |          |   |   |   |                                                                         |
| chr3 Cufflinks exon37832334            | 37832402 | . | - | . | gene_id "XLOC_038214"; transcript_id "TCONS_00063470"; exon_number "2"; |
| oId "CUFF.65016.4"; tss_id "TSS48136"; |          |   |   |   |                                                                         |
| chr3 Cufflinks exon37862505            | 37862591 | . | - | . | gene_id "XLOC_038214"; transcript_id "TCONS_00063470"; exon_number "3"; |
| oId "CUFF.65016.4"; tss_id "TSS48136"; |          |   |   |   |                                                                         |
| chr3 Cufflinks exon37876170            | 37876258 | . | - | . | gene_id "XLOC_038214"; transcript_id "TCONS_00063470"; exon_number "4"; |
| oId "CUFF.65016.4"; tss_id "TSS48136"; |          |   |   |   |                                                                         |
| chr3 Cufflinks exon37892915            | 37892983 | . | - | . | gene_id "XLOC_038214"; transcript_id "TCONS_00063470"; exon_number "5"; |
| oId "CUFF.65016.4"; tss_id "TSS48136"; |          |   |   |   |                                                                         |
| chr3 Cufflinks exon37903192            | 37903271 | . | - | . | gene_id "XLOC_038214"; transcript_id "TCONS_00063470"; exon_number "6"; |
| oId "CUFF.65016.4"; tss_id "TSS48136"; |          |   |   |   |                                                                         |
| chr3 Cufflinks exon37843215            | 37845494 | . | - | . | gene_id "XLOC_038214"; transcript_id "TCONS_00063473"; exon_number "1"; |
| oId "CUFF.65016.7"; tss_id "TSS48136"; |          |   |   |   |                                                                         |
| chr3 Cufflinks exon37850195            | 37850371 | . | - | . | gene_id "XLOC_038214"; transcript_id "TCONS_00063473"; exon_number "2"; |
| oId "CUFF.65016.7"; tss_id "TSS48136"; |          |   |   |   |                                                                         |
| chr3 Cufflinks exon37862505            | 37862591 | . | - | . | gene_id "XLOC_038214"; transcript_id "TCONS_00063473"; exon_number "3"; |
| oId "CUFF.65016.7"; tss_id "TSS48136"; |          |   |   |   |                                                                         |
| chr3 Cufflinks exon37876170            | 37876258 | . | - | . | gene_id "XLOC_038214"; transcript_id "TCONS_00063473"; exon_number "4"; |
| oId "CUFF.65016.7"; tss_id "TSS48136"; |          |   |   |   |                                                                         |
| chr3 Cufflinks exon37892915            | 37892983 | . | - | . | gene_id "XLOC_038214"; transcript_id "TCONS_00063473"; exon_number "5"; |
| oId "CUFF.65016.7"; tss_id "TSS48136"; |          |   |   |   |                                                                         |
| chr3 Cufflinks exon37903192            | 37903271 | . | - | . | gene_id "XLOC_038214"; transcript_id "TCONS_00063473"; exon_number "6"; |
| oId "CUFF.65016.7"; tss_id "TSS48136"; |          |   |   |   |                                                                         |
| chr3 Cufflinks exon37843215            | 37845494 | . | - | . | gene_id "XLOC_038214"; transcript_id "TCONS_00063472"; exon_number "1"; |
| oId "CUFF.65016.6"; tss_id "TSS48136"; |          |   |   |   |                                                                         |
| chr3 Cufflinks exon37847570            | 37847719 | . | - | . | gene_id "XLOC_038214"; transcript_id "TCONS_00063472"; exon_number "2"; |
| oId "CUFF.65016.6"; tss_id "TSS48136"; |          |   |   |   |                                                                         |
| chr3 Cufflinks exon37850195            | 37850371 | . | - | . | gene_id "XLOC_038214"; transcript_id "TCONS_00063472"; exon_number "3"; |
| oId "CUFF.65016.6"; tss_id "TSS48136"; |          |   |   |   |                                                                         |
| chr3 Cufflinks exon37860301            | 37860421 | . | - | . | gene_id "XLOC_038214"; transcript_id "TCONS_00063472"; exon_number "4"; |
| oId "CUFF.65016.6"; tss_id "TSS48136"; |          |   |   |   |                                                                         |
| chr3 Cufflinks exon37862505            | 37862591 | . | - | . | gene_id "XLOC_038214"; transcript_id "TCONS_00063472"; exon_number "5"; |
| oId "CUFF.65016.6"; tss_id "TSS48136"; |          |   |   |   |                                                                         |
| chr3 Cufflinks exon37876170            | 37876258 | . | - | . | gene_id "XLOC_038214"; transcript_id "TCONS_00063472"; exon_number "6"; |
| oId "CUFF.65016.6"; tss_id "TSS48136"; |          |   |   |   |                                                                         |
| chr3 Cufflinks exon37903192            | 37903271 | . | - | . | gene_id "XLOC_038214"; transcript_id "TCONS_00063472"; exon_number "7"; |
| oId "CUFF.65016.6"; tss_id "TSS48136"; |          |   |   |   |                                                                         |
| chr3 Cufflinks exon37843215            | 37845498 | . | - | . | gene_id "XLOC_038214"; transcript_id "TCONS_00063471"; exon_number "1"; |
| oId "CUFF.65016.5"; tss_id "TSS48136"; |          |   |   |   |                                                                         |
| chr3 Cufflinks exon37847570            | 37847719 | . | - | . | gene_id "XLOC_038214"; transcript_id "TCONS_00063471"; exon_number "2"; |
| oId "CUFF.65016.5"; tss_id "TSS48136"; |          |   |   |   |                                                                         |
| chr3 Cufflinks exon37850195            | 37850371 | . | - | . | gene_id "XLOC_038214"; transcript_id "TCONS_00063471"; exon_number "3"; |

|                                         |   |   |   |                                                                         |  |
|-----------------------------------------|---|---|---|-------------------------------------------------------------------------|--|
| oId "CUFF.65016.5"; tss_id "TSS48136";  |   |   |   |                                                                         |  |
| chr3 Cufflinks exon37862505 37862591    | . | - | . | gene_id "XLOC_038214"; transcript_id "TCONS_00063471"; exon_number "4"; |  |
| oId "CUFF.65016.5"; tss_id "TSS48136";  |   |   |   |                                                                         |  |
| chr3 Cufflinks exon37876170 37876258    | . | - | . | gene_id "XLOC_038214"; transcript_id "TCONS_00063471"; exon_number "5"; |  |
| oId "CUFF.65016.5"; tss_id "TSS48136";  |   |   |   |                                                                         |  |
| chr3 Cufflinks exon37892915 37892983    | . | - | . | gene_id "XLOC_038214"; transcript_id "TCONS_00063471"; exon_number "6"; |  |
| oId "CUFF.65016.5"; tss_id "TSS48136";  |   |   |   |                                                                         |  |
| chr3 Cufflinks exon37903192 37903271    | . | - | . | gene_id "XLOC_038214"; transcript_id "TCONS_00063471"; exon_number "7"; |  |
| oId "CUFF.65016.5"; tss_id "TSS48136";  |   |   |   |                                                                         |  |
| chr3 Cufflinks exon37859496 37860421    | . | - | . | gene_id "XLOC_038214"; transcript_id "TCONS_00063477"; exon_number "1"; |  |
| oId "CUFF.65016.9"; tss_id "TSS48136";  |   |   |   |                                                                         |  |
| chr3 Cufflinks exon37862505 37862591    | . | - | . | gene_id "XLOC_038214"; transcript_id "TCONS_00063477"; exon_number "2"; |  |
| oId "CUFF.65016.9"; tss_id "TSS48136";  |   |   |   |                                                                         |  |
| chr3 Cufflinks exon37876170 37876258    | . | - | . | gene_id "XLOC_038214"; transcript_id "TCONS_00063477"; exon_number "3"; |  |
| oId "CUFF.65016.9"; tss_id "TSS48136";  |   |   |   |                                                                         |  |
| chr3 Cufflinks exon37892915 37892983    | . | - | . | gene_id "XLOC_038214"; transcript_id "TCONS_00063477"; exon_number "4"; |  |
| oId "CUFF.65016.9"; tss_id "TSS48136";  |   |   |   |                                                                         |  |
| chr3 Cufflinks exon37903192 37903271    | . | - | . | gene_id "XLOC_038214"; transcript_id "TCONS_00063477"; exon_number "5"; |  |
| oId "CUFF.65016.9"; tss_id "TSS48136";  |   |   |   |                                                                         |  |
| chr3 Cufflinks exon37859496 37860421    | . | - | . | gene_id "XLOC_038214"; transcript_id "TCONS_00063476"; exon_number "1"; |  |
| oId "CUFF.65016.10"; tss_id "TSS48136"; |   |   |   |                                                                         |  |
| chr3 Cufflinks exon37862505 37862591    | . | - | . | gene_id "XLOC_038214"; transcript_id "TCONS_00063476"; exon_number "2"; |  |
| oId "CUFF.65016.10"; tss_id "TSS48136"; |   |   |   |                                                                         |  |
| chr3 Cufflinks exon37876170 37876258    | . | - | . | gene_id "XLOC_038214"; transcript_id "TCONS_00063476"; exon_number "3"; |  |
| oId "CUFF.65016.10"; tss_id "TSS48136"; |   |   |   |                                                                         |  |
| chr3 Cufflinks exon37903192 37903271    | . | - | . | gene_id "XLOC_038214"; transcript_id "TCONS_00063476"; exon_number "4"; |  |
| oId "CUFF.65016.10"; tss_id "TSS48136"; |   |   |   |                                                                         |  |
| chr3 Cufflinks exon40367653 40367694    | . | - | . | gene_id "XLOC_038247"; transcript_id "TCONS_00063533"; exon_number "1"; |  |
| oId "CUFF.65168.1"; tss_id "TSS48178";  |   |   |   |                                                                         |  |
| chr3 Cufflinks exon40433945 40434060    | . | - | . | gene_id "XLOC_038247"; transcript_id "TCONS_00063533"; exon_number "2"; |  |
| oId "CUFF.65168.1"; tss_id "TSS48178";  |   |   |   |                                                                         |  |
| chr3 Cufflinks exon40440965 40441119    | . | - | . | gene_id "XLOC_038247"; transcript_id "TCONS_00063533"; exon_number "3"; |  |
| oId "CUFF.65168.1"; tss_id "TSS48178";  |   |   |   |                                                                         |  |
| chr3 Cufflinks exon40493196 40493273    | . | - | . | gene_id "XLOC_038247"; transcript_id "TCONS_00063533"; exon_number "4"; |  |
| oId "CUFF.65168.1"; tss_id "TSS48178";  |   |   |   |                                                                         |  |
| chr3 Cufflinks exon40494613 40494799    | . | - | . | gene_id "XLOC_038247"; transcript_id "TCONS_00063533"; exon_number "5"; |  |
| oId "CUFF.65168.1"; tss_id "TSS48178";  |   |   |   |                                                                         |  |
| chr3 Cufflinks exon40432140 40434060    | . | - | . | gene_id "XLOC_038247"; transcript_id "TCONS_00063534"; exon_number "1"; |  |
| oId "CUFF.65168.3"; tss_id "TSS48178";  |   |   |   |                                                                         |  |
| chr3 Cufflinks exon40440965 40441119    | . | - | . | gene_id "XLOC_038247"; transcript_id "TCONS_00063534"; exon_number "2"; |  |
| oId "CUFF.65168.3"; tss_id "TSS48178";  |   |   |   |                                                                         |  |
| chr3 Cufflinks exon40493196 40493273    | . | - | . | gene_id "XLOC_038247"; transcript_id "TCONS_00063534"; exon_number "3"; |  |
| oId "CUFF.65168.3"; tss_id "TSS48178";  |   |   |   |                                                                         |  |



|                                        |          |   |   |   |                                                                         |
|----------------------------------------|----------|---|---|---|-------------------------------------------------------------------------|
| chr3 Cufflinks exon40494613            | 40494799 | . | - | . | gene_id "XLOC_038247"; transcript_id "TCONS_00063534"; exon_number "4"; |
| oId "CUFF.65168.3"; tss_id "TSS48178"; |          |   |   |   |                                                                         |
| chr3 Cufflinks exon40432140            | 40434061 | . | - | . | gene_id "XLOC_038247"; transcript_id "TCONS_00063535"; exon_number "1"; |
| oId "CUFF.65168.2"; tss_id "TSS48178"; |          |   |   |   |                                                                         |
| chr3 Cufflinks exon40440966            | 40441122 | . | - | . | gene_id "XLOC_038247"; transcript_id "TCONS_00063535"; exon_number "2"; |
| oId "CUFF.65168.2"; tss_id "TSS48178"; |          |   |   |   |                                                                         |
| chr3 Cufflinks exon40450618            | 40450741 | . | - | . | gene_id "XLOC_038247"; transcript_id "TCONS_00063535"; exon_number "3"; |
| oId "CUFF.65168.2"; tss_id "TSS48178"; |          |   |   |   |                                                                         |
| chr3 Cufflinks exon40493196            | 40493275 | . | - | . | gene_id "XLOC_038247"; transcript_id "TCONS_00063535"; exon_number "4"; |
| oId "CUFF.65168.2"; tss_id "TSS48178"; |          |   |   |   |                                                                         |
| chr3 Cufflinks exon40494614            | 40494801 | . | - | . | gene_id "XLOC_038247"; transcript_id "TCONS_00063535"; exon_number "5"; |
| oId "CUFF.65168.2"; tss_id "TSS48178"; |          |   |   |   |                                                                         |
| chr3 Cufflinks exon44462624            | 44463305 | . | - | . | gene_id "XLOC_038272"; transcript_id "TCONS_00063578"; exon_number "1"; |
| oId "CUFF.65271.2"; tss_id "TSS48206"; |          |   |   |   |                                                                         |
| chr3 Cufflinks exon44464345            | 44464415 | . | - | . | gene_id "XLOC_038272"; transcript_id "TCONS_00063578"; exon_number "2"; |
| oId "CUFF.65271.2"; tss_id "TSS48206"; |          |   |   |   |                                                                         |
| chr3 Cufflinks exon44462624            | 44463305 | . | - | . | gene_id "XLOC_038272"; transcript_id "TCONS_00063579"; exon_number "1"; |
| oId "CUFF.65271.1"; tss_id "TSS48207"; |          |   |   |   |                                                                         |
| chr3 Cufflinks exon44465455            | 44465517 | . | - | . | gene_id "XLOC_038272"; transcript_id "TCONS_00063579"; exon_number "2"; |
| oId "CUFF.65271.1"; tss_id "TSS48207"; |          |   |   |   |                                                                         |
| chr3 Cufflinks exon50635593            | 50637680 | . | - | . | gene_id "XLOC_038412"; transcript_id "TCONS_00063848"; exon_number "1"; |
| oId "CUFF.65681.1"; tss_id "TSS48401"; |          |   |   |   |                                                                         |
| chr3 Cufflinks exon50637764            | 50638203 | . | - | . | gene_id "XLOC_038412"; transcript_id "TCONS_00063848"; exon_number "2"; |
| oId "CUFF.65681.1"; tss_id "TSS48401"; |          |   |   |   |                                                                         |
| chr3 Cufflinks exon50635593            | 50636632 | . | - | . | gene_id "XLOC_038412"; transcript_id "TCONS_00063849"; exon_number "1"; |
| oId "CUFF.65681.2"; tss_id "TSS48402"; |          |   |   |   |                                                                         |
| chr3 Cufflinks exon50637233            | 50637324 | . | - | . | gene_id "XLOC_038412"; transcript_id "TCONS_00063849"; exon_number "2"; |
| oId "CUFF.65681.2"; tss_id "TSS48402"; |          |   |   |   |                                                                         |
| chr3 Cufflinks exon50638290            | 50642423 | . | - | . | gene_id "XLOC_038412"; transcript_id "TCONS_00063849"; exon_number "3"; |
| oId "CUFF.65681.2"; tss_id "TSS48402"; |          |   |   |   |                                                                         |
| chr3 Cufflinks exon51418938            | 51422173 | . | - | . | gene_id "XLOC_038416"; transcript_id "TCONS_00063855"; exon_number "1"; |
| oId "CUFF.65695.1"; tss_id "TSS48407"; |          |   |   |   |                                                                         |
| chr3 Cufflinks exon51422457            | 51422504 | . | - | . | gene_id "XLOC_038416"; transcript_id "TCONS_00063855"; exon_number "2"; |
| oId "CUFF.65695.1"; tss_id "TSS48407"; |          |   |   |   |                                                                         |
| chr3 Cufflinks exon53100889            | 53107164 | . | - | . | gene_id "XLOC_038460"; transcript_id "TCONS_00063944"; exon_number "1"; |
| oId "CUFF.65820.3"; tss_id "TSS48470"; |          |   |   |   |                                                                         |
| chr3 Cufflinks exon53111704            | 53111844 | . | - | . | gene_id "XLOC_038460"; transcript_id "TCONS_00063944"; exon_number "2"; |
| oId "CUFF.65820.3"; tss_id "TSS48470"; |          |   |   |   |                                                                         |
| chr3 Cufflinks exon53111995            | 53117213 | . | - | . | gene_id "XLOC_038460"; transcript_id "TCONS_00063944"; exon_number "3"; |
| oId "CUFF.65820.3"; tss_id "TSS48470"; |          |   |   |   |                                                                         |
| chr3 Cufflinks exon53100889            | 53111844 | . | - | . | gene_id "XLOC_038460"; transcript_id "TCONS_00063943"; exon_number "1"; |
| oId "CUFF.65820.2"; tss_id "TSS48470"; |          |   |   |   |                                                                         |
| chr3 Cufflinks exon53111995            | 53117213 | . | - | . | gene_id "XLOC_038460"; transcript_id "TCONS_00063943"; exon_number "2"; |

|                                        |   |   |   |                                                                         |  |
|----------------------------------------|---|---|---|-------------------------------------------------------------------------|--|
| oId "CUFF.65820.2"; tss_id "TSS48470"; |   |   |   |                                                                         |  |
| chr3 Cufflinks exon66751430 66751609   | . | - | . | gene_id "XLOC_038570"; transcript_id "TCONS_00064113"; exon_number "1"; |  |
| oId "CUFF.66152.1"; tss_id "TSS48604"; |   |   |   |                                                                         |  |
| chr3 Cufflinks exon66768368 66768450   | . | - | . | gene_id "XLOC_038570"; transcript_id "TCONS_00064113"; exon_number "2"; |  |
| oId "CUFF.66152.1"; tss_id "TSS48604"; |   |   |   |                                                                         |  |
| chr3 Cufflinks exon66768554 66768657   | . | - | . | gene_id "XLOC_038570"; transcript_id "TCONS_00064113"; exon_number "3"; |  |
| oId "CUFF.66152.1"; tss_id "TSS48604"; |   |   |   |                                                                         |  |
| chr3 Cufflinks exon66929935 66930027   | . | - | . | gene_id "XLOC_038570"; transcript_id "TCONS_00064113"; exon_number "4"; |  |
| oId "CUFF.66152.1"; tss_id "TSS48604"; |   |   |   |                                                                         |  |
| chr3 Cufflinks exon66889929 66890116   | . | - | . | gene_id "XLOC_038570"; transcript_id "TCONS_00064114"; exon_number "1"; |  |
| oId "CUFF.66152.5"; tss_id "TSS48605"; |   |   |   |                                                                         |  |
| chr3 Cufflinks exon66929935 66930018   | . | - | . | gene_id "XLOC_038570"; transcript_id "TCONS_00064114"; exon_number "2"; |  |
| oId "CUFF.66152.5"; tss_id "TSS48605"; |   |   |   |                                                                         |  |
| chr3 Cufflinks exon67022769 67022818   | . | - | . | gene_id "XLOC_038570"; transcript_id "TCONS_00064114"; exon_number "3"; |  |
| oId "CUFF.66152.5"; tss_id "TSS48605"; |   |   |   |                                                                         |  |
| chr3 Cufflinks exon67006172 67006522   | . | - | . | gene_id "XLOC_038570"; transcript_id "TCONS_00064119"; exon_number "1"; |  |
| oId "CUFF.66152.7"; tss_id "TSS48606"; |   |   |   |                                                                         |  |
| chr3 Cufflinks exon67006618 67006774   | . | - | . | gene_id "XLOC_038570"; transcript_id "TCONS_00064119"; exon_number "2"; |  |
| oId "CUFF.66152.7"; tss_id "TSS48606"; |   |   |   |                                                                         |  |
| chr3 Cufflinks exon67011074 67011119   | . | - | . | gene_id "XLOC_038570"; transcript_id "TCONS_00064119"; exon_number "3"; |  |
| oId "CUFF.66152.7"; tss_id "TSS48606"; |   |   |   |                                                                         |  |
| chr3 Cufflinks exon67006172 67006522   | . | - | . | gene_id "XLOC_038570"; transcript_id "TCONS_00064120"; exon_number "1"; |  |
| oId "CUFF.66152.6"; tss_id "TSS48605"; |   |   |   |                                                                         |  |
| chr3 Cufflinks exon67006618 67006774   | . | - | . | gene_id "XLOC_038570"; transcript_id "TCONS_00064120"; exon_number "2"; |  |
| oId "CUFF.66152.6"; tss_id "TSS48605"; |   |   |   |                                                                         |  |
| chr3 Cufflinks exon67022769 67022817   | . | - | . | gene_id "XLOC_038570"; transcript_id "TCONS_00064120"; exon_number "3"; |  |
| oId "CUFF.66152.6"; tss_id "TSS48605"; |   |   |   |                                                                         |  |
| chr3 Cufflinks exon67006172 67006523   | . | - | . | gene_id "XLOC_038570"; transcript_id "TCONS_00064121"; exon_number "1"; |  |
| oId "CUFF.66152.8"; tss_id "TSS48605"; |   |   |   |                                                                         |  |
| chr3 Cufflinks exon67006619 67006774   | . | - | . | gene_id "XLOC_038570"; transcript_id "TCONS_00064121"; exon_number "2"; |  |
| oId "CUFF.66152.8"; tss_id "TSS48605"; |   |   |   |                                                                         |  |
| chr3 Cufflinks exon67022769 67022822   | . | - | . | gene_id "XLOC_038570"; transcript_id "TCONS_00064121"; exon_number "3"; |  |
| oId "CUFF.66152.8"; tss_id "TSS48605"; |   |   |   |                                                                         |  |
| chr3 Cufflinks exon72084670 72085671   | . | - | . | gene_id "XLOC_038603"; transcript_id "TCONS_00064191"; exon_number "1"; |  |
| oId "CUFF.66225.1"; tss_id "TSS48659"; |   |   |   |                                                                         |  |
| chr3 Cufflinks exon72105012 72105113   | . | - | . | gene_id "XLOC_038603"; transcript_id "TCONS_00064191"; exon_number "2"; |  |
| oId "CUFF.66225.1"; tss_id "TSS48659"; |   |   |   |                                                                         |  |
| chr3 Cufflinks exon72108838 72109260   | . | - | . | gene_id "XLOC_038603"; transcript_id "TCONS_00064191"; exon_number "3"; |  |
| oId "CUFF.66225.1"; tss_id "TSS48659"; |   |   |   |                                                                         |  |
| chr3 Cufflinks exon72109954 72110245   | . | - | . | gene_id "XLOC_038603"; transcript_id "TCONS_00064191"; exon_number "4"; |  |
| oId "CUFF.66225.1"; tss_id "TSS48659"; |   |   |   |                                                                         |  |
| chr3 Cufflinks exon72149055 72149157   | . | - | . | gene_id "XLOC_038603"; transcript_id "TCONS_00064191"; exon_number "5"; |  |
| oId "CUFF.66225.1"; tss_id "TSS48659"; |   |   |   |                                                                         |  |

|                                        |          |   |   |   |                                                                         |
|----------------------------------------|----------|---|---|---|-------------------------------------------------------------------------|
| chr3 Cufflinks exon72149939            | 72150034 | . | - | . | gene_id "XLOC_038603"; transcript_id "TCONS_00064191"; exon_number "6"; |
| oId "CUFF.66225.1"; tss_id "TSS48659"; |          |   |   |   |                                                                         |
| chr3 Cufflinks exon72084670            | 72085324 | . | - | . | gene_id "XLOC_038603"; transcript_id "TCONS_00064192"; exon_number "1"; |
| oId "CUFF.66225.2"; tss_id "TSS48659"; |          |   |   |   |                                                                         |
| chr3 Cufflinks exon72085476            | 72085671 | . | - | . | gene_id "XLOC_038603"; transcript_id "TCONS_00064192"; exon_number "2"; |
| oId "CUFF.66225.2"; tss_id "TSS48659"; |          |   |   |   |                                                                         |
| chr3 Cufflinks exon72105012            | 72105113 | . | - | . | gene_id "XLOC_038603"; transcript_id "TCONS_00064192"; exon_number "3"; |
| oId "CUFF.66225.2"; tss_id "TSS48659"; |          |   |   |   |                                                                         |
| chr3 Cufflinks exon72108838            | 72109260 | . | - | . | gene_id "XLOC_038603"; transcript_id "TCONS_00064192"; exon_number "4"; |
| oId "CUFF.66225.2"; tss_id "TSS48659"; |          |   |   |   |                                                                         |
| chr3 Cufflinks exon72109661            | 72109762 | . | - | . | gene_id "XLOC_038603"; transcript_id "TCONS_00064192"; exon_number "5"; |
| oId "CUFF.66225.2"; tss_id "TSS48659"; |          |   |   |   |                                                                         |
| chr3 Cufflinks exon72109954            | 72110245 | . | - | . | gene_id "XLOC_038603"; transcript_id "TCONS_00064192"; exon_number "6"; |
| oId "CUFF.66225.2"; tss_id "TSS48659"; |          |   |   |   |                                                                         |
| chr3 Cufflinks exon72149055            | 72149161 | . | - | . | gene_id "XLOC_038603"; transcript_id "TCONS_00064192"; exon_number "7"; |
| oId "CUFF.66225.2"; tss_id "TSS48659"; |          |   |   |   |                                                                         |
| chr3 Cufflinks exon72149939            | 72150050 | . | - | . | gene_id "XLOC_038603"; transcript_id "TCONS_00064192"; exon_number "8"; |
| oId "CUFF.66225.2"; tss_id "TSS48659"; |          |   |   |   |                                                                         |
| chr3 Cufflinks exon72084670            | 72085324 | . | - | . | gene_id "XLOC_038603"; transcript_id "TCONS_00064193"; exon_number "1"; |
| oId "CUFF.66225.3"; tss_id "TSS48659"; |          |   |   |   |                                                                         |
| chr3 Cufflinks exon72085476            | 72085671 | . | - | . | gene_id "XLOC_038603"; transcript_id "TCONS_00064193"; exon_number "2"; |
| oId "CUFF.66225.3"; tss_id "TSS48659"; |          |   |   |   |                                                                         |
| chr3 Cufflinks exon72105012            | 72105113 | . | - | . | gene_id "XLOC_038603"; transcript_id "TCONS_00064193"; exon_number "3"; |
| oId "CUFF.66225.3"; tss_id "TSS48659"; |          |   |   |   |                                                                         |
| chr3 Cufflinks exon72108838            | 72109260 | . | - | . | gene_id "XLOC_038603"; transcript_id "TCONS_00064193"; exon_number "4"; |
| oId "CUFF.66225.3"; tss_id "TSS48659"; |          |   |   |   |                                                                         |
| chr3 Cufflinks exon72109661            | 72109762 | . | - | . | gene_id "XLOC_038603"; transcript_id "TCONS_00064193"; exon_number "5"; |
| oId "CUFF.66225.3"; tss_id "TSS48659"; |          |   |   |   |                                                                         |
| chr3 Cufflinks exon72109954            | 72110245 | . | - | . | gene_id "XLOC_038603"; transcript_id "TCONS_00064193"; exon_number "6"; |
| oId "CUFF.66225.3"; tss_id "TSS48659"; |          |   |   |   |                                                                         |
| chr3 Cufflinks exon72149055            | 72149161 | . | - | . | gene_id "XLOC_038603"; transcript_id "TCONS_00064193"; exon_number "7"; |
| oId "CUFF.66225.3"; tss_id "TSS48659"; |          |   |   |   |                                                                         |
| chr3 Cufflinks exon72149320            | 72149410 | . | - | . | gene_id "XLOC_038603"; transcript_id "TCONS_00064193"; exon_number "8"; |
| oId "CUFF.66225.3"; tss_id "TSS48659"; |          |   |   |   |                                                                         |
| chr3 Cufflinks exon72149939            | 72150110 | . | - | . | gene_id "XLOC_038603"; transcript_id "TCONS_00064193"; exon_number "9"; |
| oId "CUFF.66225.3"; tss_id "TSS48659"; |          |   |   |   |                                                                         |
| chr3 Cufflinks exon75716585            | 75717576 | . | - | . | gene_id "XLOC_038638"; transcript_id "TCONS_00064239"; exon_number "1"; |
| oId "CUFF.66312.1"; tss_id "TSS48697"; |          |   |   |   |                                                                         |
| chr3 Cufflinks exon75719171            | 75721238 | . | - | . | gene_id "XLOC_038638"; transcript_id "TCONS_00064239"; exon_number "2"; |
| oId "CUFF.66312.1"; tss_id "TSS48697"; |          |   |   |   |                                                                         |
| chr3 Cufflinks exon98220649            | 98222748 | . | - | . | gene_id "XLOC_038670"; transcript_id "TCONS_00064291"; exon_number "1"; |
| oId "CUFF.66501.3"; tss_id "TSS48736"; |          |   |   |   |                                                                         |
| chr3 Cufflinks exon98223312            | 98223388 | . | - | . | gene_id "XLOC_038670"; transcript_id "TCONS_00064291"; exon_number "2"; |

|                                        |   |   |   |                                                                         |  |
|----------------------------------------|---|---|---|-------------------------------------------------------------------------|--|
| oId "CUFF.66501.3"; tss_id "TSS48736"; |   |   |   |                                                                         |  |
| chr3 Cufflinks exon98223718 98224048   | . | - | . | gene_id "XLOC_038670"; transcript_id "TCONS_00064291"; exon_number "3"; |  |
| oId "CUFF.66501.3"; tss_id "TSS48736"; |   |   |   |                                                                         |  |
| chr3 Cufflinks exon98862884 98863560   | . | - | . | gene_id "XLOC_038680"; transcript_id "TCONS_00064305"; exon_number "1"; |  |
| oId "CUFF.66529.4"; tss_id "TSS48746"; |   |   |   |                                                                         |  |
| chr3 Cufflinks exon98866879 98866954   | . | - | . | gene_id "XLOC_038680"; transcript_id "TCONS_00064305"; exon_number "2"; |  |
| oId "CUFF.66529.4"; tss_id "TSS48746"; |   |   |   |                                                                         |  |
| chr3 Cufflinks exon98916926 98917055   | . | - | . | gene_id "XLOC_038680"; transcript_id "TCONS_00064305"; exon_number "3"; |  |
| oId "CUFF.66529.4"; tss_id "TSS48746"; |   |   |   |                                                                         |  |
| chr3 Cufflinks exon98917598 98917911   | . | - | . | gene_id "XLOC_038680"; transcript_id "TCONS_00064305"; exon_number "4"; |  |
| oId "CUFF.66529.4"; tss_id "TSS48746"; |   |   |   |                                                                         |  |
| chr3 Cufflinks exon106828637 106828851 | . | - | . | gene_id "XLOC_038706"; transcript_id "TCONS_00064355"; exon_number "1"; |  |
| oId "CUFF.66650.1"; tss_id "TSS48778"; |   |   |   |                                                                         |  |
| chr3 Cufflinks exon106830907 106830993 | . | - | . | gene_id "XLOC_038706"; transcript_id "TCONS_00064355"; exon_number "2"; |  |
| oId "CUFF.66650.1"; tss_id "TSS48778"; |   |   |   |                                                                         |  |
| chr3 Cufflinks exon106848735 106848839 | . | - | . | gene_id "XLOC_038706"; transcript_id "TCONS_00064355"; exon_number "3"; |  |
| oId "CUFF.66650.1"; tss_id "TSS48778"; |   |   |   |                                                                         |  |
| chr3 Cufflinks exon106959290 106959485 | . | - | . | gene_id "XLOC_038706"; transcript_id "TCONS_00064355"; exon_number "4"; |  |
| oId "CUFF.66650.1"; tss_id "TSS48778"; |   |   |   |                                                                         |  |
| chr3 Cufflinks exon106828637 106828851 | . | - | . | gene_id "XLOC_038706"; transcript_id "TCONS_00064356"; exon_number "1"; |  |
| oId "CUFF.66650.2"; tss_id "TSS48778"; |   |   |   |                                                                         |  |
| chr3 Cufflinks exon106848735 106848839 | . | - | . | gene_id "XLOC_038706"; transcript_id "TCONS_00064356"; exon_number "2"; |  |
| oId "CUFF.66650.2"; tss_id "TSS48778"; |   |   |   |                                                                         |  |
| chr3 Cufflinks exon106959290 106959493 | . | - | . | gene_id "XLOC_038706"; transcript_id "TCONS_00064356"; exon_number "3"; |  |
| oId "CUFF.66650.2"; tss_id "TSS48778"; |   |   |   |                                                                         |  |
| chr3 Cufflinks exon106830529 106830993 | . | - | . | gene_id "XLOC_038706"; transcript_id "TCONS_00064357"; exon_number "1"; |  |
| oId "CUFF.66650.3"; tss_id "TSS48778"; |   |   |   |                                                                         |  |
| chr3 Cufflinks exon106848735 106848839 | . | - | . | gene_id "XLOC_038706"; transcript_id "TCONS_00064357"; exon_number "2"; |  |
| oId "CUFF.66650.3"; tss_id "TSS48778"; |   |   |   |                                                                         |  |
| chr3 Cufflinks exon106959290 106959493 | . | - | . | gene_id "XLOC_038706"; transcript_id "TCONS_00064357"; exon_number "3"; |  |
| oId "CUFF.66650.3"; tss_id "TSS48778"; |   |   |   |                                                                         |  |
| chr3 Cufflinks exon107732648 107732878 | . | - | . | gene_id "XLOC_038710"; transcript_id "TCONS_00064361"; exon_number "1"; |  |
| oId "CUFF.66672.1"; tss_id "TSS48782"; |   |   |   |                                                                         |  |
| chr3 Cufflinks exon107743040 107743416 | . | - | . | gene_id "XLOC_038710"; transcript_id "TCONS_00064361"; exon_number "2"; |  |
| oId "CUFF.66672.1"; tss_id "TSS48782"; |   |   |   |                                                                         |  |
| chr3 Cufflinks exon107751209 107753075 | . | - | . | gene_id "XLOC_038710"; transcript_id "TCONS_00064366"; exon_number "1"; |  |
| oId "CUFF.66672.4"; tss_id "TSS48784"; |   |   |   |                                                                         |  |
| chr3 Cufflinks exon107754645 107754656 | . | - | . | gene_id "XLOC_038710"; transcript_id "TCONS_00064366"; exon_number "2"; |  |
| oId "CUFF.66672.4"; tss_id "TSS48784"; |   |   |   |                                                                         |  |
| chr3 Cufflinks exon120081448 120085067 | . | - | . | gene_id "XLOC_038989"; transcript_id "TCONS_00064734"; exon_number "1"; |  |
| oId "CUFF.67310.1"; tss_id "TSS49083"; |   |   |   |                                                                         |  |
| chr3 Cufflinks exon120085243 120085390 | . | - | . | gene_id "XLOC_038989"; transcript_id "TCONS_00064734"; exon_number "2"; |  |
| oId "CUFF.67310.1"; tss_id "TSS49083"; |   |   |   |                                                                         |  |

chr3 Cufflinks exon120086211 120086619 . - . gene\_id "XLOC\_038989"; transcript\_id "TCONS\_00064734"; exon\_number "3";  
oId "CUFF.67310.1"; tss\_id "TSS49083";  
chr3 Cufflinks exon120081448 120085067 . - . gene\_id "XLOC\_038989"; transcript\_id "TCONS\_00064735"; exon\_number "1";  
oId "CUFF.67310.2"; tss\_id "TSS49084";  
chr3 Cufflinks exon120085243 120085390 . - . gene\_id "XLOC\_038989"; transcript\_id "TCONS\_00064735"; exon\_number "2";  
oId "CUFF.67310.2"; tss\_id "TSS49084";  
chr3 Cufflinks exon120097348 120097388 . - . gene\_id "XLOC\_038989"; transcript\_id "TCONS\_00064735"; exon\_number "3";  
oId "CUFF.67310.2"; tss\_id "TSS49084";  
chr3 Cufflinks exon126635874 126635886 . - . gene\_id "XLOC\_039068"; transcript\_id "TCONS\_00064897"; exon\_number "1";  
oId "CUFF.67576.1"; tss\_id "TSS49199";  
chr3 Cufflinks exon126931212 126932384 . - . gene\_id "XLOC\_039068"; transcript\_id "TCONS\_00064897"; exon\_number "2";  
oId "CUFF.67576.1"; tss\_id "TSS49199";  
chr3 Cufflinks exon126937830 126939676 . - . gene\_id "XLOC\_039074"; transcript\_id "TCONS\_00064903"; exon\_number "1";  
oId "CUFF.67595.2"; tss\_id "TSS49205";  
chr3 Cufflinks exon126940180 126941702 . - . gene\_id "XLOC\_039074"; transcript\_id "TCONS\_00064903"; exon\_number "2";  
oId "CUFF.67595.2"; tss\_id "TSS49205";  
chr3 Cufflinks exon129705473 129705497 . - . gene\_id "XLOC\_039117"; transcript\_id "TCONS\_00065010"; exon\_number "1";  
oId "CUFF.67877.1"; tss\_id "TSS49280";  
chr3 Cufflinks exon129807510 129808085 . - . gene\_id "XLOC\_039117"; transcript\_id "TCONS\_00065010"; exon\_number "2";  
oId "CUFF.67877.1"; tss\_id "TSS49280";  
chr3 Cufflinks exon131094815 131095551 . - . gene\_id "XLOC\_039129"; transcript\_id "TCONS\_00065037"; exon\_number "1";  
oId "CUFF.67934.6"; tss\_id "TSS49298";  
chr3 Cufflinks exon131100177 131100319 . - . gene\_id "XLOC\_039129"; transcript\_id "TCONS\_00065037"; exon\_number "2";  
oId "CUFF.67934.6"; tss\_id "TSS49298";  
chr3 Cufflinks exon131094815 131095551 . - . gene\_id "XLOC\_039129"; transcript\_id "TCONS\_00065040"; exon\_number "1";  
oId "CUFF.67934.5"; tss\_id "TSS49299";  
chr3 Cufflinks exon131123635 131123711 . - . gene\_id "XLOC\_039129"; transcript\_id "TCONS\_00065040"; exon\_number "2";  
oId "CUFF.67934.5"; tss\_id "TSS49299";  
chr3 Cufflinks exon131124392 131124578 . - . gene\_id "XLOC\_039129"; transcript\_id "TCONS\_00065040"; exon\_number "3";  
oId "CUFF.67934.5"; tss\_id "TSS49299";  
chr3 Cufflinks exon131150393 131150542 . - . gene\_id "XLOC\_039129"; transcript\_id "TCONS\_00065040"; exon\_number "4";  
oId "CUFF.67934.5"; tss\_id "TSS49299";  
chr3 Cufflinks exon131150813 131151019 . - . gene\_id "XLOC\_039129"; transcript\_id "TCONS\_00065040"; exon\_number "5";  
oId "CUFF.67934.5"; tss\_id "TSS49299";  
chr3 Cufflinks exon131160793 131160989 . - . gene\_id "XLOC\_039129"; transcript\_id "TCONS\_00065040"; exon\_number "6";  
oId "CUFF.67934.5"; tss\_id "TSS49299";  
chr3 Cufflinks exon131161240 131161287 . - . gene\_id "XLOC\_039129"; transcript\_id "TCONS\_00065040"; exon\_number "7";  
oId "CUFF.67934.5"; tss\_id "TSS49299";  
chr3 Cufflinks exon131094815 131095551 . - . gene\_id "XLOC\_039129"; transcript\_id "TCONS\_00065039"; exon\_number "1";  
oId "CUFF.67934.4"; tss\_id "TSS49299";  
chr3 Cufflinks exon131123635 131123711 . - . gene\_id "XLOC\_039129"; transcript\_id "TCONS\_00065039"; exon\_number "2";  
oId "CUFF.67934.4"; tss\_id "TSS49299";  
chr3 Cufflinks exon131150393 131150542 . - . gene\_id "XLOC\_039129"; transcript\_id "TCONS\_00065039"; exon\_number "3";

oId "CUFF.67934.4"; tss\_id "TSS49299";  
chr3 Cufflinks exon131150813 131151019 . - . gene\_id "XLOC\_039129"; transcript\_id "TCONS\_00065039"; exon\_number "4";  
oId "CUFF.67934.4"; tss\_id "TSS49299";  
chr3 Cufflinks exon131160793 131160989 . - . gene\_id "XLOC\_039129"; transcript\_id "TCONS\_00065039"; exon\_number "5";  
oId "CUFF.67934.4"; tss\_id "TSS49299";  
chr3 Cufflinks exon131161240 131161287 . - . gene\_id "XLOC\_039129"; transcript\_id "TCONS\_00065039"; exon\_number "6";  
oId "CUFF.67934.4"; tss\_id "TSS49299";  
chr3 Cufflinks exon131094815 131095551 . - . gene\_id "XLOC\_039129"; transcript\_id "TCONS\_00065038"; exon\_number "1";  
oId "CUFF.67934.3"; tss\_id "TSS49299";  
chr3 Cufflinks exon131123635 131123711 . - . gene\_id "XLOC\_039129"; transcript\_id "TCONS\_00065038"; exon\_number "2";  
oId "CUFF.67934.3"; tss\_id "TSS49299";  
chr3 Cufflinks exon131160793 131160989 . - . gene\_id "XLOC\_039129"; transcript\_id "TCONS\_00065038"; exon\_number "3";  
oId "CUFF.67934.3"; tss\_id "TSS49299";  
chr3 Cufflinks exon131161240 131161287 . - . gene\_id "XLOC\_039129"; transcript\_id "TCONS\_00065038"; exon\_number "4";  
oId "CUFF.67934.3"; tss\_id "TSS49299";  
chr3 Cufflinks exon131094815 131095494 . - . gene\_id "XLOC\_039129"; transcript\_id "TCONS\_00065041"; exon\_number "1";  
oId "CUFF.67934.2"; tss\_id "TSS49299";  
chr3 Cufflinks exon131123635 131123711 . - . gene\_id "XLOC\_039129"; transcript\_id "TCONS\_00065041"; exon\_number "2";  
oId "CUFF.67934.2"; tss\_id "TSS49299";  
chr3 Cufflinks exon131160793 131160989 . - . gene\_id "XLOC\_039129"; transcript\_id "TCONS\_00065041"; exon\_number "3";  
oId "CUFF.67934.2"; tss\_id "TSS49299";  
chr3 Cufflinks exon131161240 131161294 . - . gene\_id "XLOC\_039129"; transcript\_id "TCONS\_00065041"; exon\_number "4";  
oId "CUFF.67934.2"; tss\_id "TSS49299";  
chr3 Cufflinks exon133093627 133098724 . - . gene\_id "XLOC\_039157"; transcript\_id "TCONS\_00065074"; exon\_number "1";  
oId "CUFF.68000.1"; tss\_id "TSS49329";  
chr3 Cufflinks exon133100507 133100583 . - . gene\_id "XLOC\_039157"; transcript\_id "TCONS\_00065074"; exon\_number "2";  
oId "CUFF.68000.1"; tss\_id "TSS49329";  
chr3 Cufflinks exon133103148 133103256 . - . gene\_id "XLOC\_039157"; transcript\_id "TCONS\_00065074"; exon\_number "3";  
oId "CUFF.68000.1"; tss\_id "TSS49329";  
chr3 Cufflinks exon133174173 133174307 . - . gene\_id "XLOC\_039157"; transcript\_id "TCONS\_00065074"; exon\_number "4";  
oId "CUFF.68000.1"; tss\_id "TSS49329";  
chr3 Cufflinks exon133196341 133196482 . - . gene\_id "XLOC\_039157"; transcript\_id "TCONS\_00065074"; exon\_number "5";  
oId "CUFF.68000.1"; tss\_id "TSS49329";  
chr3 Cufflinks exon133142769 133142795 . - . gene\_id "XLOC\_039157"; transcript\_id "TCONS\_00065077"; exon\_number "1";  
oId "CUFF.68000.2"; tss\_id "TSS49330";  
chr3 Cufflinks exon133145146 133146179 . - . gene\_id "XLOC\_039157"; transcript\_id "TCONS\_00065077"; exon\_number "2";  
oId "CUFF.68000.2"; tss\_id "TSS49330";  
chr3 Cufflinks exon133156242 133156339 . - . gene\_id "XLOC\_039157"; transcript\_id "TCONS\_00065077"; exon\_number "3";  
oId "CUFF.68000.2"; tss\_id "TSS49330";  
chr3 Cufflinks exon133174173 133174307 . - . gene\_id "XLOC\_039157"; transcript\_id "TCONS\_00065077"; exon\_number "4";  
oId "CUFF.68000.2"; tss\_id "TSS49330";  
chr3 Cufflinks exon133209746 133210281 . - . gene\_id "XLOC\_039157"; transcript\_id "TCONS\_00065077"; exon\_number "5";  
oId "CUFF.68000.2"; tss\_id "TSS49330";

|                                        |           |   |   |   |                                                                         |
|----------------------------------------|-----------|---|---|---|-------------------------------------------------------------------------|
| chr3 Cufflinks exon133871514           | 133872195 | . | - | . | gene_id "XLOC_039174"; transcript_id "TCONS_00065097"; exon_number "1"; |
| oId "CUFF.68043.2"; tss_id "TSS49350"; |           |   |   |   |                                                                         |
| chr3 Cufflinks exon133872640           | 133873979 | . | - | . | gene_id "XLOC_039174"; transcript_id "TCONS_00065097"; exon_number "2"; |
| oId "CUFF.68043.2"; tss_id "TSS49350"; |           |   |   |   |                                                                         |
| chr3 Cufflinks exon135073799           | 135075258 | . | - | . | gene_id "XLOC_039182"; transcript_id "TCONS_00065116"; exon_number "1"; |
| oId "CUFF.68075.3"; tss_id "TSS49361"; |           |   |   |   |                                                                         |
| chr3 Cufflinks exon135076114           | 135076144 | . | - | . | gene_id "XLOC_039182"; transcript_id "TCONS_00065116"; exon_number "2"; |
| oId "CUFF.68075.3"; tss_id "TSS49361"; |           |   |   |   |                                                                         |
| chr3 Cufflinks exon135073799           | 135075258 | . | - | . | gene_id "XLOC_039182"; transcript_id "TCONS_00065118"; exon_number "1"; |
| oId "CUFF.68075.2"; tss_id "TSS49362"; |           |   |   |   |                                                                         |
| chr3 Cufflinks exon135098104           | 135098269 | . | - | . | gene_id "XLOC_039182"; transcript_id "TCONS_00065118"; exon_number "2"; |
| oId "CUFF.68075.2"; tss_id "TSS49362"; |           |   |   |   |                                                                         |
| chr3 Cufflinks exon135098623           | 135098689 | . | - | . | gene_id "XLOC_039182"; transcript_id "TCONS_00065118"; exon_number "3"; |
| oId "CUFF.68075.2"; tss_id "TSS49362"; |           |   |   |   |                                                                         |
| chr3 Cufflinks exon135158605           | 135158696 | . | - | . | gene_id "XLOC_039182"; transcript_id "TCONS_00065118"; exon_number "4"; |
| oId "CUFF.68075.2"; tss_id "TSS49362"; |           |   |   |   |                                                                         |
| chr3 Cufflinks exon135073799           | 135075163 | . | - | . | gene_id "XLOC_039182"; transcript_id "TCONS_00065117"; exon_number "1"; |
| oId "CUFF.68075.1"; tss_id "TSS49362"; |           |   |   |   |                                                                         |
| chr3 Cufflinks exon135098104           | 135098269 | . | - | . | gene_id "XLOC_039182"; transcript_id "TCONS_00065117"; exon_number "2"; |
| oId "CUFF.68075.1"; tss_id "TSS49362"; |           |   |   |   |                                                                         |
| chr3 Cufflinks exon135098623           | 135098689 | . | - | . | gene_id "XLOC_039182"; transcript_id "TCONS_00065117"; exon_number "3"; |
| oId "CUFF.68075.1"; tss_id "TSS49362"; |           |   |   |   |                                                                         |
| chr3 Cufflinks exon135158598           | 135158696 | . | - | . | gene_id "XLOC_039182"; transcript_id "TCONS_00065117"; exon_number "4"; |
| oId "CUFF.68075.1"; tss_id "TSS49362"; |           |   |   |   |                                                                         |
| chr3 Cufflinks exon136553406           | 136553465 | . | - | . | gene_id "XLOC_039199"; transcript_id "TCONS_00065144"; exon_number "1"; |
| oId "CUFF.68132.1"; tss_id "TSS49387"; |           |   |   |   |                                                                         |
| chr3 Cufflinks exon136561073           | 136561411 | . | - | . | gene_id "XLOC_039199"; transcript_id "TCONS_00065144"; exon_number "2"; |
| oId "CUFF.68132.1"; tss_id "TSS49387"; |           |   |   |   |                                                                         |
| chr3 Cufflinks exon136565370           | 136565428 | . | - | . | gene_id "XLOC_039199"; transcript_id "TCONS_00065144"; exon_number "3"; |
| oId "CUFF.68132.1"; tss_id "TSS49387"; |           |   |   |   |                                                                         |
| chr3 Cufflinks exon136580589           | 136580907 | . | - | . | gene_id "XLOC_039199"; transcript_id "TCONS_00065144"; exon_number "4"; |
| oId "CUFF.68132.1"; tss_id "TSS49387"; |           |   |   |   |                                                                         |
| chr3 Cufflinks exon136560818           | 136561411 | . | - | . | gene_id "XLOC_039199"; transcript_id "TCONS_00065149"; exon_number "1"; |
| oId "CUFF.68132.4"; tss_id "TSS49387"; |           |   |   |   |                                                                         |
| chr3 Cufflinks exon136565370           | 136565428 | . | - | . | gene_id "XLOC_039199"; transcript_id "TCONS_00065149"; exon_number "2"; |
| oId "CUFF.68132.4"; tss_id "TSS49387"; |           |   |   |   |                                                                         |
| chr3 Cufflinks exon136580457           | 136580905 | . | - | . | gene_id "XLOC_039199"; transcript_id "TCONS_00065149"; exon_number "3"; |
| oId "CUFF.68132.4"; tss_id "TSS49387"; |           |   |   |   |                                                                         |
| chr3 Cufflinks exon136560818           | 136561411 | . | - | . | gene_id "XLOC_039199"; transcript_id "TCONS_00065148"; exon_number "1"; |
| oId "CUFF.68132.3"; tss_id "TSS49387"; |           |   |   |   |                                                                         |
| chr3 Cufflinks exon136565370           | 136565428 | . | - | . | gene_id "XLOC_039199"; transcript_id "TCONS_00065148"; exon_number "2"; |
| oId "CUFF.68132.3"; tss_id "TSS49387"; |           |   |   |   |                                                                         |
| chr3 Cufflinks exon136577360           | 136577445 | . | - | . | gene_id "XLOC_039199"; transcript_id "TCONS_00065148"; exon_number "3"; |

|                                        |   |   |   |                                                                         |  |
|----------------------------------------|---|---|---|-------------------------------------------------------------------------|--|
| oId "CUFF.68132.3"; tss_id "TSS49387"; |   |   |   |                                                                         |  |
| chr3 Cufflinks exon136580589 136580905 | . | - | . | gene_id "XLOC_039199"; transcript_id "TCONS_00065148"; exon_number "4"; |  |
| oId "CUFF.68132.3"; tss_id "TSS49387"; |   |   |   |                                                                         |  |
| chr3 Cufflinks exon136560818 136561411 | . | - | . | gene_id "XLOC_039199"; transcript_id "TCONS_00065147"; exon_number "1"; |  |
| oId "CUFF.68132.2"; tss_id "TSS49387"; |   |   |   |                                                                         |  |
| chr3 Cufflinks exon136565370 136565428 | . | - | . | gene_id "XLOC_039199"; transcript_id "TCONS_00065147"; exon_number "2"; |  |
| oId "CUFF.68132.2"; tss_id "TSS49387"; |   |   |   |                                                                         |  |
| chr3 Cufflinks exon136580589 136580905 | . | - | . | gene_id "XLOC_039199"; transcript_id "TCONS_00065147"; exon_number "3"; |  |
| oId "CUFF.68132.2"; tss_id "TSS49387"; |   |   |   |                                                                         |  |
| chr3 Cufflinks exon150451089 150452651 | . | - | . | gene_id "XLOC_039304"; transcript_id "TCONS_00065317"; exon_number "1"; |  |
| oId "CUFF.68578.2"; tss_id "TSS49519"; |   |   |   |                                                                         |  |
| chr3 Cufflinks exon150454129 150454302 | . | - | . | gene_id "XLOC_039304"; transcript_id "TCONS_00065317"; exon_number "2"; |  |
| oId "CUFF.68578.2"; tss_id "TSS49519"; |   |   |   |                                                                         |  |
| chr3 Cufflinks exon150456638 150456772 | . | - | . | gene_id "XLOC_039304"; transcript_id "TCONS_00065317"; exon_number "3"; |  |
| oId "CUFF.68578.2"; tss_id "TSS49519"; |   |   |   |                                                                         |  |
| chr3 Cufflinks exon150451089 150452651 | . | - | . | gene_id "XLOC_039304"; transcript_id "TCONS_00065316"; exon_number "1"; |  |
| oId "CUFF.68578.1"; tss_id "TSS49519"; |   |   |   |                                                                         |  |
| chr3 Cufflinks exon150454138 150454302 | . | - | . | gene_id "XLOC_039304"; transcript_id "TCONS_00065316"; exon_number "2"; |  |
| oId "CUFF.68578.1"; tss_id "TSS49519"; |   |   |   |                                                                         |  |
| chr3 Cufflinks exon150456638 150456772 | . | - | . | gene_id "XLOC_039304"; transcript_id "TCONS_00065316"; exon_number "3"; |  |
| oId "CUFF.68578.1"; tss_id "TSS49519"; |   |   |   |                                                                         |  |
| chr3 Cufflinks exon150792751 150793613 | . | - | . | gene_id "XLOC_039306"; transcript_id "TCONS_00065322"; exon_number "1"; |  |
| oId "CUFF.68588.2"; tss_id "TSS49524"; |   |   |   |                                                                         |  |
| chr3 Cufflinks exon150794993 150795649 | . | - | . | gene_id "XLOC_039306"; transcript_id "TCONS_00065322"; exon_number "2"; |  |
| oId "CUFF.68588.2"; tss_id "TSS49524"; |   |   |   |                                                                         |  |
| chr3 Cufflinks exon150792751 150793614 | . | - | . | gene_id "XLOC_039306"; transcript_id "TCONS_00065323"; exon_number "1"; |  |
| oId "CUFF.68588.3"; tss_id "TSS49525"; |   |   |   |                                                                         |  |
| chr3 Cufflinks exon150794993 150796003 | . | - | . | gene_id "XLOC_039306"; transcript_id "TCONS_00065323"; exon_number "2"; |  |
| oId "CUFF.68588.3"; tss_id "TSS49525"; |   |   |   |                                                                         |  |
| chr3 Cufflinks exon150792751 150793613 | . | - | . | gene_id "XLOC_039306"; transcript_id "TCONS_00065324"; exon_number "1"; |  |
| oId "CUFF.68588.4"; tss_id "TSS49526"; |   |   |   |                                                                         |  |
| chr3 Cufflinks exon150794993 150795174 | . | - | . | gene_id "XLOC_039306"; transcript_id "TCONS_00065324"; exon_number "2"; |  |
| oId "CUFF.68588.4"; tss_id "TSS49526"; |   |   |   |                                                                         |  |
| chr3 Cufflinks exon150804079 150804376 | . | - | . | gene_id "XLOC_039306"; transcript_id "TCONS_00065324"; exon_number "3"; |  |
| oId "CUFF.68588.4"; tss_id "TSS49526"; |   |   |   |                                                                         |  |
| chr3 Cufflinks exon155538864 155539485 | . | - | . | gene_id "XLOC_039333"; transcript_id "TCONS_00065366"; exon_number "1"; |  |
| oId "CUFF.68675.2"; tss_id "TSS49561"; |   |   |   |                                                                         |  |
| chr3 Cufflinks exon155540187 155540358 | . | - | . | gene_id "XLOC_039333"; transcript_id "TCONS_00065366"; exon_number "2"; |  |
| oId "CUFF.68675.2"; tss_id "TSS49561"; |   |   |   |                                                                         |  |
| chr3 Cufflinks exon178243255 178244413 | . | - | . | gene_id "XLOC_039468"; transcript_id "TCONS_00065568"; exon_number "1"; |  |
| oId "CUFF.69180.1"; tss_id "TSS49721"; |   |   |   |                                                                         |  |
| chr3 Cufflinks exon178466217 178466273 | . | - | . | gene_id "XLOC_039468"; transcript_id "TCONS_00065568"; exon_number "2"; |  |
| oId "CUFF.69180.1"; tss_id "TSS49721"; |   |   |   |                                                                         |  |



|                                        |           |   |   |   |                                                                         |
|----------------------------------------|-----------|---|---|---|-------------------------------------------------------------------------|
| chr3 Cufflinks exon178466834           | 178467024 | . | - | . | gene_id "XLOC_039468"; transcript_id "TCONS_00065568"; exon_number "3"; |
| oId "CUFF.69180.1"; tss_id "TSS49721"; |           |   |   |   |                                                                         |
| chr3 Cufflinks exon178519581           | 178519722 | . | - | . | gene_id "XLOC_039468"; transcript_id "TCONS_00065568"; exon_number "4"; |
| oId "CUFF.69180.1"; tss_id "TSS49721"; |           |   |   |   |                                                                         |
| chr3 Cufflinks exon178577277           | 178577411 | . | - | . | gene_id "XLOC_039468"; transcript_id "TCONS_00065568"; exon_number "5"; |
| oId "CUFF.69180.1"; tss_id "TSS49721"; |           |   |   |   |                                                                         |
| chr3 Cufflinks exon178578082           | 178578193 | . | - | . | gene_id "XLOC_039468"; transcript_id "TCONS_00065568"; exon_number "6"; |
| oId "CUFF.69180.1"; tss_id "TSS49721"; |           |   |   |   |                                                                         |
| chr3 Cufflinks exon185276113           | 185276532 | . | - | . | gene_id "XLOC_039524"; transcript_id "TCONS_00065666"; exon_number "1"; |
| oId "CUFF.69404.1"; tss_id "TSS49797"; |           |   |   |   |                                                                         |
| chr3 Cufflinks exon185278466           | 185278538 | . | - | . | gene_id "XLOC_039524"; transcript_id "TCONS_00065666"; exon_number "2"; |
| oId "CUFF.69404.1"; tss_id "TSS49797"; |           |   |   |   |                                                                         |
| chr3 Cufflinks exon185279799           | 185279812 | . | - | . | gene_id "XLOC_039524"; transcript_id "TCONS_00065666"; exon_number "3"; |
| oId "CUFF.69404.1"; tss_id "TSS49797"; |           |   |   |   |                                                                         |
| chr3 Cufflinks exon186528669           | 186529432 | . | - | . | gene_id "XLOC_039540"; transcript_id "TCONS_00065714"; exon_number "1"; |
| oId "CUFF.69449.4"; tss_id "TSS49826"; |           |   |   |   |                                                                         |
| chr3 Cufflinks exon186529482           | 186529937 | . | - | . | gene_id "XLOC_039540"; transcript_id "TCONS_00065714"; exon_number "2"; |
| oId "CUFF.69449.4"; tss_id "TSS49826"; |           |   |   |   |                                                                         |
| chr3 Cufflinks exon186541334           | 186541410 | . | - | . | gene_id "XLOC_039540"; transcript_id "TCONS_00065714"; exon_number "3"; |
| oId "CUFF.69449.4"; tss_id "TSS49826"; |           |   |   |   |                                                                         |
| chr3 Cufflinks exon186542231           | 186542501 | . | - | . | gene_id "XLOC_039540"; transcript_id "TCONS_00065714"; exon_number "4"; |
| oId "CUFF.69449.4"; tss_id "TSS49826"; |           |   |   |   |                                                                         |
| chr3 Cufflinks exon186543096           | 186545323 | . | - | . | gene_id "XLOC_039540"; transcript_id "TCONS_00065714"; exon_number "5"; |
| oId "CUFF.69449.4"; tss_id "TSS49826"; |           |   |   |   |                                                                         |
| chr3 Cufflinks exon186528669           | 186529937 | . | - | . | gene_id "XLOC_039540"; transcript_id "TCONS_00065713"; exon_number "1"; |
| oId "CUFF.69449.3"; tss_id "TSS49826"; |           |   |   |   |                                                                         |
| chr3 Cufflinks exon186541334           | 186541410 | . | - | . | gene_id "XLOC_039540"; transcript_id "TCONS_00065713"; exon_number "2"; |
| oId "CUFF.69449.3"; tss_id "TSS49826"; |           |   |   |   |                                                                         |
| chr3 Cufflinks exon186542231           | 186542501 | . | - | . | gene_id "XLOC_039540"; transcript_id "TCONS_00065713"; exon_number "3"; |
| oId "CUFF.69449.3"; tss_id "TSS49826"; |           |   |   |   |                                                                         |
| chr3 Cufflinks exon186542617           | 186542986 | . | - | . | gene_id "XLOC_039540"; transcript_id "TCONS_00065713"; exon_number "4"; |
| oId "CUFF.69449.3"; tss_id "TSS49826"; |           |   |   |   |                                                                         |
| chr3 Cufflinks exon186543737           | 186545323 | . | - | . | gene_id "XLOC_039540"; transcript_id "TCONS_00065713"; exon_number "5"; |
| oId "CUFF.69449.3"; tss_id "TSS49826"; |           |   |   |   |                                                                         |
| chr3 Cufflinks exon186528669           | 186529937 | . | - | . | gene_id "XLOC_039540"; transcript_id "TCONS_00065712"; exon_number "1"; |
| oId "CUFF.69449.2"; tss_id "TSS49826"; |           |   |   |   |                                                                         |
| chr3 Cufflinks exon186541334           | 186541410 | . | - | . | gene_id "XLOC_039540"; transcript_id "TCONS_00065712"; exon_number "2"; |
| oId "CUFF.69449.2"; tss_id "TSS49826"; |           |   |   |   |                                                                         |
| chr3 Cufflinks exon186542231           | 186542501 | . | - | . | gene_id "XLOC_039540"; transcript_id "TCONS_00065712"; exon_number "3"; |
| oId "CUFF.69449.2"; tss_id "TSS49826"; |           |   |   |   |                                                                         |
| chr3 Cufflinks exon186542617           | 186545323 | . | - | . | gene_id "XLOC_039540"; transcript_id "TCONS_00065712"; exon_number "4"; |
| oId "CUFF.69449.2"; tss_id "TSS49826"; |           |   |   |   |                                                                         |
| chr3 Cufflinks exon186530106           | 186530186 | . | - | . | gene_id "XLOC_039540"; transcript_id "TCONS_00065715"; exon_number "1"; |

|                                        |   |   |   |                                                                         |  |
|----------------------------------------|---|---|---|-------------------------------------------------------------------------|--|
| oId "CUFF.69449.5"; tss_id "TSS49827"; |   |   |   |                                                                         |  |
| chr3 Cufflinks exon186541334 186541410 | . | - | . | gene_id "XLOC_039540"; transcript_id "TCONS_00065715"; exon_number "2"; |  |
| oId "CUFF.69449.5"; tss_id "TSS49827"; |   |   |   |                                                                         |  |
| chr3 Cufflinks exon186542231 186542501 | . | - | . | gene_id "XLOC_039540"; transcript_id "TCONS_00065715"; exon_number "3"; |  |
| oId "CUFF.69449.5"; tss_id "TSS49827"; |   |   |   |                                                                         |  |
| chr3 Cufflinks exon186543096 186543322 | . | - | . | gene_id "XLOC_039540"; transcript_id "TCONS_00065715"; exon_number "4"; |  |
| oId "CUFF.69449.5"; tss_id "TSS49827"; |   |   |   |                                                                         |  |
| chr3 Cufflinks exon187509996 187510853 | . | - | . | gene_id "XLOC_039550"; transcript_id "TCONS_00065731"; exon_number "1"; |  |
| oId "CUFF.69477.1"; tss_id "TSS49841"; |   |   |   |                                                                         |  |
| chr3 Cufflinks exon187510972 187511279 | . | - | . | gene_id "XLOC_039550"; transcript_id "TCONS_00065731"; exon_number "2"; |  |
| oId "CUFF.69477.1"; tss_id "TSS49841"; |   |   |   |                                                                         |  |
| chr3 Cufflinks exon187513391 187513477 | . | - | . | gene_id "XLOC_039550"; transcript_id "TCONS_00065731"; exon_number "3"; |  |
| oId "CUFF.69477.1"; tss_id "TSS49841"; |   |   |   |                                                                         |  |
| chr3 Cufflinks exon187533719 187533858 | . | - | . | gene_id "XLOC_039550"; transcript_id "TCONS_00065731"; exon_number "4"; |  |
| oId "CUFF.69477.1"; tss_id "TSS49841"; |   |   |   |                                                                         |  |
| chr3 Cufflinks exon187551212 187553967 | . | - | . | gene_id "XLOC_039550"; transcript_id "TCONS_00065731"; exon_number "5"; |  |
| oId "CUFF.69477.1"; tss_id "TSS49841"; |   |   |   |                                                                         |  |
| chr3 Cufflinks exon187594795 187594910 | . | - | . | gene_id "XLOC_039550"; transcript_id "TCONS_00065731"; exon_number "6"; |  |
| oId "CUFF.69477.1"; tss_id "TSS49841"; |   |   |   |                                                                         |  |
| chr3 Cufflinks exon187608002 187608494 | . | - | . | gene_id "XLOC_039550"; transcript_id "TCONS_00065731"; exon_number "7"; |  |
| oId "CUFF.69477.1"; tss_id "TSS49841"; |   |   |   |                                                                         |  |
| chr3 Cufflinks exon187542750 187553967 | . | - | . | gene_id "XLOC_039550"; transcript_id "TCONS_00065736"; exon_number "1"; |  |
| oId "CUFF.69477.2"; tss_id "TSS49841"; |   |   |   |                                                                         |  |
| chr3 Cufflinks exon187594795 187594910 | . | - | . | gene_id "XLOC_039550"; transcript_id "TCONS_00065736"; exon_number "2"; |  |
| oId "CUFF.69477.2"; tss_id "TSS49841"; |   |   |   |                                                                         |  |
| chr3 Cufflinks exon187608002 187608494 | . | - | . | gene_id "XLOC_039550"; transcript_id "TCONS_00065736"; exon_number "3"; |  |
| oId "CUFF.69477.2"; tss_id "TSS49841"; |   |   |   |                                                                         |  |
| chr3 Cufflinks exon193918509 193921468 | . | - | . | gene_id "XLOC_039572"; transcript_id "TCONS_00065761"; exon_number "1"; |  |
| oId "CUFF.69605.1"; tss_id "TSS49866"; |   |   |   |                                                                         |  |
| chr3 Cufflinks exon193922608 193922755 | . | - | . | gene_id "XLOC_039572"; transcript_id "TCONS_00065761"; exon_number "2"; |  |
| oId "CUFF.69605.1"; tss_id "TSS49866"; |   |   |   |                                                                         |  |
| chr3 Cufflinks exon193923557 193923609 | . | - | . | gene_id "XLOC_039572"; transcript_id "TCONS_00065761"; exon_number "3"; |  |
| oId "CUFF.69605.1"; tss_id "TSS49866"; |   |   |   |                                                                         |  |
| chr3 Cufflinks exon193918509 193921468 | . | - | . | gene_id "XLOC_039572"; transcript_id "TCONS_00065762"; exon_number "1"; |  |
| oId "CUFF.69605.2"; tss_id "TSS49867"; |   |   |   |                                                                         |  |
| chr3 Cufflinks exon193922608 193922755 | . | - | . | gene_id "XLOC_039572"; transcript_id "TCONS_00065762"; exon_number "2"; |  |
| oId "CUFF.69605.2"; tss_id "TSS49867"; |   |   |   |                                                                         |  |
| chr3 Cufflinks exon193924037 193924096 | . | - | . | gene_id "XLOC_039572"; transcript_id "TCONS_00065762"; exon_number "3"; |  |
| oId "CUFF.69605.2"; tss_id "TSS49867"; |   |   |   |                                                                         |  |
| chr3 Cufflinks exon194014138 194014636 | . | - | . | gene_id "XLOC_039581"; transcript_id "TCONS_00065771"; exon_number "1"; |  |
| oId "CUFF.69621.4"; tss_id "TSS49876"; |   |   |   |                                                                         |  |
| chr3 Cufflinks exon194019343 194019375 | . | - | . | gene_id "XLOC_039581"; transcript_id "TCONS_00065771"; exon_number "2"; |  |
| oId "CUFF.69621.4"; tss_id "TSS49876"; |   |   |   |                                                                         |  |

|                                         |           |   |   |   |                                                                         |
|-----------------------------------------|-----------|---|---|---|-------------------------------------------------------------------------|
| chr3 Cufflinks exon194023546            | 194024174 | . | - | . | gene_id "XLOC_039581"; transcript_id "TCONS_00065771"; exon_number "3"; |
| oId "CUFF.69621.4"; tss_id "TSS49876";  |           |   |   |   |                                                                         |
| chr3 Cufflinks exon194018989            | 194019375 | . | - | . | gene_id "XLOC_039581"; transcript_id "TCONS_00065774"; exon_number "1"; |
| oId "CUFF.69621.5"; tss_id "TSS49876";  |           |   |   |   |                                                                         |
| chr3 Cufflinks exon194021148            | 194021526 | . | - | . | gene_id "XLOC_039581"; transcript_id "TCONS_00065774"; exon_number "2"; |
| oId "CUFF.69621.5"; tss_id "TSS49876";  |           |   |   |   |                                                                         |
| chr3 Cufflinks exon194023546            | 194024078 | . | - | . | gene_id "XLOC_039581"; transcript_id "TCONS_00065774"; exon_number "3"; |
| oId "CUFF.69621.5"; tss_id "TSS49876";  |           |   |   |   |                                                                         |
| chr3 Cufflinks exon194393783            | 194393866 | . | - | . | gene_id "XLOC_039594"; transcript_id "TCONS_00065797"; exon_number "1"; |
| oId "CUFF.69662.1"; tss_id "TSS49893";  |           |   |   |   |                                                                         |
| chr3 Cufflinks exon194406067            | 194409167 | . | - | . | gene_id "XLOC_039594"; transcript_id "TCONS_00065797"; exon_number "2"; |
| oId "CUFF.69662.1"; tss_id "TSS49893";  |           |   |   |   |                                                                         |
| chr3 Cufflinks exon195739032            | 195741886 | . | - | . | gene_id "XLOC_039621"; transcript_id "TCONS_00065855"; exon_number "1"; |
| oId "CUFF.69742.26"; tss_id "TSS49931"; |           |   |   |   |                                                                         |
| chr3 Cufflinks exon195742014            | 195747069 | . | - | . | gene_id "XLOC_039621"; transcript_id "TCONS_00065855"; exon_number "2"; |
| oId "CUFF.69742.26"; tss_id "TSS49931"; |           |   |   |   |                                                                         |
| chr3 Cufflinks exon195747457            | 195747512 | . | - | . | gene_id "XLOC_039621"; transcript_id "TCONS_00065855"; exon_number "3"; |
| oId "CUFF.69742.26"; tss_id "TSS49931"; |           |   |   |   |                                                                         |
| chr3 Cufflinks exon195739032            | 195740094 | . | - | . | gene_id "XLOC_039621"; transcript_id "TCONS_00065856"; exon_number "1"; |
| oId "CUFF.69742.25"; tss_id "TSS49931"; |           |   |   |   |                                                                         |
| chr3 Cufflinks exon195746751            | 195747600 | . | - | . | gene_id "XLOC_039621"; transcript_id "TCONS_00065856"; exon_number "2"; |
| oId "CUFF.69742.25"; tss_id "TSS49931"; |           |   |   |   |                                                                         |
| chr3 Cufflinks exon195739032            | 195747069 | . | - | . | gene_id "XLOC_039621"; transcript_id "TCONS_00065857"; exon_number "1"; |
| oId "CUFF.69742.24"; tss_id "TSS49932"; |           |   |   |   |                                                                         |
| chr3 Cufflinks exon195747482            | 195747606 | . | - | . | gene_id "XLOC_039621"; transcript_id "TCONS_00065857"; exon_number "2"; |
| oId "CUFF.69742.24"; tss_id "TSS49932"; |           |   |   |   |                                                                         |
| chr3 Cufflinks exon195750677            | 195750761 | . | - | . | gene_id "XLOC_039621"; transcript_id "TCONS_00065857"; exon_number "3"; |
| oId "CUFF.69742.24"; tss_id "TSS49932"; |           |   |   |   |                                                                         |
| chr3 Cufflinks exon195751406            | 195752583 | . | - | . | gene_id "XLOC_039624"; transcript_id "TCONS_00065859"; exon_number "1"; |
| oId "CUFF.69765.1"; tss_id "TSS49935";  |           |   |   |   |                                                                         |
| chr3 Cufflinks exon195754008            | 195754036 | . | - | . | gene_id "XLOC_039624"; transcript_id "TCONS_00065859"; exon_number "2"; |
| oId "CUFF.69765.1"; tss_id "TSS49935";  |           |   |   |   |                                                                         |
| chr3 Cufflinks exon196188202            | 196188823 | . | - | . | gene_id "XLOC_039636"; transcript_id "TCONS_00065881"; exon_number "1"; |
| oId "CUFF.69827.2"; tss_id "TSS49952";  |           |   |   |   |                                                                         |
| chr3 Cufflinks exon196189319            | 196189418 | . | - | . | gene_id "XLOC_039636"; transcript_id "TCONS_00065881"; exon_number "2"; |
| oId "CUFF.69827.2"; tss_id "TSS49952";  |           |   |   |   |                                                                         |
| chr3 Cufflinks exon196333027            | 196333166 | . | - | . | gene_id "XLOC_039643"; transcript_id "TCONS_00065890"; exon_number "1"; |
| oId "CUFF.69842.1"; tss_id "TSS49960";  |           |   |   |   |                                                                         |
| chr3 Cufflinks exon196336243            | 196336387 | . | - | . | gene_id "XLOC_039643"; transcript_id "TCONS_00065890"; exon_number "2"; |
| oId "CUFF.69842.1"; tss_id "TSS49960";  |           |   |   |   |                                                                         |
| chr3 Cufflinks exon196339509            | 196339568 | . | - | . | gene_id "XLOC_039643"; transcript_id "TCONS_00065890"; exon_number "3"; |
| oId "CUFF.69842.1"; tss_id "TSS49960";  |           |   |   |   |                                                                         |
| chr3 Cufflinks exon196388880            | 196389292 | . | - | . | gene_id "XLOC_039650"; transcript_id "TCONS_00065897"; exon_number "1"; |

|                                        |   |   |   |                                                                         |
|----------------------------------------|---|---|---|-------------------------------------------------------------------------|
| oId "CUFF.69866.1"; tss_id "TSS49967"; |   |   |   |                                                                         |
| chr3 Cufflinks exon196390833 196390908 | . | - | . | gene_id "XLOC_039650"; transcript_id "TCONS_00065897"; exon_number "2"; |
| oId "CUFF.69866.1"; tss_id "TSS49967"; |   |   |   |                                                                         |
| chr3 Cufflinks exon196392082 196392303 | . | - | . | gene_id "XLOC_039650"; transcript_id "TCONS_00065897"; exon_number "3"; |
| oId "CUFF.69866.1"; tss_id "TSS49967"; |   |   |   |                                                                         |
| chr3 Cufflinks exon196388880 196389292 | . | - | . | gene_id "XLOC_039650"; transcript_id "TCONS_00065898"; exon_number "1"; |
| oId "CUFF.69866.2"; tss_id "TSS49968"; |   |   |   |                                                                         |
| chr3 Cufflinks exon196390833 196390908 | . | - | . | gene_id "XLOC_039650"; transcript_id "TCONS_00065898"; exon_number "2"; |
| oId "CUFF.69866.2"; tss_id "TSS49968"; |   |   |   |                                                                         |
| chr3 Cufflinks exon196395486 196395976 | . | - | . | gene_id "XLOC_039650"; transcript_id "TCONS_00065898"; exon_number "3"; |
| oId "CUFF.69866.2"; tss_id "TSS49968"; |   |   |   |                                                                         |
| chr3 Cufflinks exon197072284 197073302 | . | - | . | gene_id "XLOC_039663"; transcript_id "TCONS_00065935"; exon_number "1"; |
| oId "CUFF.69925.4"; tss_id "TSS49987"; |   |   |   |                                                                         |
| chr3 Cufflinks exon197147851 197147950 | . | - | . | gene_id "XLOC_039663"; transcript_id "TCONS_00065935"; exon_number "2"; |
| oId "CUFF.69925.4"; tss_id "TSS49987"; |   |   |   |                                                                         |
| chr3 Cufflinks exon197171892 197172194 | . | - | . | gene_id "XLOC_039663"; transcript_id "TCONS_00065935"; exon_number "3"; |
| oId "CUFF.69925.4"; tss_id "TSS49987"; |   |   |   |                                                                         |
| chr3 Cufflinks exon197172688 197172854 | . | - | . | gene_id "XLOC_039663"; transcript_id "TCONS_00065935"; exon_number "4"; |
| oId "CUFF.69925.4"; tss_id "TSS49987"; |   |   |   |                                                                         |
| chr3 Cufflinks exon197094822 197095826 | . | - | . | gene_id "XLOC_039663"; transcript_id "TCONS_00065937"; exon_number "1"; |
| oId "CUFF.69925.8"; tss_id "TSS49988"; |   |   |   |                                                                         |
| chr3 Cufflinks exon197147851 197147919 | . | - | . | gene_id "XLOC_039663"; transcript_id "TCONS_00065937"; exon_number "2"; |
| oId "CUFF.69925.8"; tss_id "TSS49988"; |   |   |   |                                                                         |
| chr3 Cufflinks exon197094822 197095819 | . | - | . | gene_id "XLOC_039663"; transcript_id "TCONS_00065938"; exon_number "1"; |
| oId "CUFF.69925.9"; tss_id "TSS49987"; |   |   |   |                                                                         |
| chr3 Cufflinks exon197106248 197106471 | . | - | . | gene_id "XLOC_039663"; transcript_id "TCONS_00065938"; exon_number "2"; |
| oId "CUFF.69925.9"; tss_id "TSS49987"; |   |   |   |                                                                         |
| chr3 Cufflinks exon197147851 197147949 | . | - | . | gene_id "XLOC_039663"; transcript_id "TCONS_00065938"; exon_number "3"; |
| oId "CUFF.69925.9"; tss_id "TSS49987"; |   |   |   |                                                                         |
| chr3 Cufflinks exon197171892 197172194 | . | - | . | gene_id "XLOC_039663"; transcript_id "TCONS_00065938"; exon_number "4"; |
| oId "CUFF.69925.9"; tss_id "TSS49987"; |   |   |   |                                                                         |
| chr3 Cufflinks exon197172688 197172854 | . | - | . | gene_id "XLOC_039663"; transcript_id "TCONS_00065938"; exon_number "5"; |
| oId "CUFF.69925.9"; tss_id "TSS49987"; |   |   |   |                                                                         |
| chr3 Cufflinks exon197094822 197095819 | . | - | . | gene_id "XLOC_039663"; transcript_id "TCONS_00065939"; exon_number "1"; |
| oId "CUFF.69925.7"; tss_id "TSS49989"; |   |   |   |                                                                         |
| chr3 Cufflinks exon197100418 197100588 | . | - | . | gene_id "XLOC_039663"; transcript_id "TCONS_00065939"; exon_number "2"; |
| oId "CUFF.69925.7"; tss_id "TSS49989"; |   |   |   |                                                                         |
| chr3 Cufflinks exon197106248 197106471 | . | - | . | gene_id "XLOC_039663"; transcript_id "TCONS_00065939"; exon_number "3"; |
| oId "CUFF.69925.7"; tss_id "TSS49989"; |   |   |   |                                                                         |
| chr3 Cufflinks exon197132841 197133009 | . | - | . | gene_id "XLOC_039663"; transcript_id "TCONS_00065939"; exon_number "4"; |
| oId "CUFF.69925.7"; tss_id "TSS49989"; |   |   |   |                                                                         |
| chr3 Cufflinks exon197147851 197147949 | . | - | . | gene_id "XLOC_039663"; transcript_id "TCONS_00065939"; exon_number "5"; |
| oId "CUFF.69925.7"; tss_id "TSS49989"; |   |   |   |                                                                         |

|                                         |           |   |   |   |                                                                             |
|-----------------------------------------|-----------|---|---|---|-----------------------------------------------------------------------------|
| chr3 Cufflinks exon197171892            | 197172194 | . | - | . | gene_id "XLOC_039663"; transcript_id "TCONS_00065939"; exon_number "6";     |
| oId "CUFF.69925.7"; tss_id "TSS49989";  |           |   |   |   |                                                                             |
| chr3 Cufflinks exon197178015            | 197178177 | . | - | . | gene_id "XLOC_039663"; transcript_id "TCONS_00065939"; exon_number "7";     |
| oId "CUFF.69925.7"; tss_id "TSS49989";  |           |   |   |   |                                                                             |
| chr3 Cufflinks exon197104928            | 197105242 | . | - | . | gene_id "XLOC_039663"; transcript_id "TCONS_00065943"; exon_number "1";     |
| oId "CUFF.69925.12"; tss_id "TSS49992"; |           |   |   |   |                                                                             |
| chr3 Cufflinks exon197106248            | 197106471 | . | - | . | gene_id "XLOC_039663"; transcript_id "TCONS_00065943"; exon_number "2";     |
| oId "CUFF.69925.12"; tss_id "TSS49992"; |           |   |   |   |                                                                             |
| chr3 Cufflinks exon197147851            | 197147949 | . | - | . | gene_id "XLOC_039663"; transcript_id "TCONS_00065943"; exon_number "3";     |
| oId "CUFF.69925.12"; tss_id "TSS49992"; |           |   |   |   |                                                                             |
| chr3 Cufflinks exon197171892            | 197172194 | . | - | . | gene_id "XLOC_039663"; transcript_id "TCONS_00065943"; exon_number "4";     |
| oId "CUFF.69925.12"; tss_id "TSS49992"; |           |   |   |   |                                                                             |
| chr3 Cufflinks exon197184499            | 197184654 | . | - | . | gene_id "XLOC_039663"; transcript_id "TCONS_00065943"; exon_number "5";     |
| oId "CUFF.69925.12"; tss_id "TSS49992"; |           |   |   |   |                                                                             |
| chr3 Cufflinks exon197185056            | 197185155 | . | - | . | gene_id "XLOC_039663"; transcript_id "TCONS_00065943"; exon_number "6";     |
| oId "CUFF.69925.12"; tss_id "TSS49992"; |           |   |   |   |                                                                             |
| chr3 Cufflinks exon197108625            | 197108679 | . | - | . | gene_id "XLOC_039663"; transcript_id "TCONS_00065945"; exon_number "1";     |
| oId "CUFF.69925.13"; tss_id "TSS49987"; |           |   |   |   |                                                                             |
| chr3 Cufflinks exon197147851            | 197147949 | . | - | . | gene_id "XLOC_039663"; transcript_id "TCONS_00065945"; exon_number "2";     |
| oId "CUFF.69925.13"; tss_id "TSS49987"; |           |   |   |   |                                                                             |
| chr3 Cufflinks exon197171892            | 197172194 | . | - | . | gene_id "XLOC_039663"; transcript_id "TCONS_00065945"; exon_number "3";     |
| oId "CUFF.69925.13"; tss_id "TSS49987"; |           |   |   |   |                                                                             |
| chr3 Cufflinks exon197172688            | 197172854 | . | - | . | gene_id "XLOC_039663"; transcript_id "TCONS_00065945"; exon_number "4";     |
| oId "CUFF.69925.13"; tss_id "TSS49987"; |           |   |   |   |                                                                             |
| chr3 Cufflinks exon197133244            | 197134391 | . | - | . | gene_id "XLOC_039663"; transcript_id "TCONS_00065952"; exon_number "1";     |
| oId "CUFF.69925.15"; tss_id "TSS49987"; |           |   |   |   |                                                                             |
| chr3 Cufflinks exon197147851            | 197147949 | . | - | . | gene_id "XLOC_039663"; transcript_id "TCONS_00065952"; exon_number "2";     |
| oId "CUFF.69925.15"; tss_id "TSS49987"; |           |   |   |   |                                                                             |
| chr3 Cufflinks exon197171892            | 197172194 | . | - | . | gene_id "XLOC_039663"; transcript_id "TCONS_00065952"; exon_number "3";     |
| oId "CUFF.69925.15"; tss_id "TSS49987"; |           |   |   |   |                                                                             |
| chr3 Cufflinks exon197172688            | 197172854 | . | - | . | gene_id "XLOC_039663"; transcript_id "TCONS_00065952"; exon_number "4";     |
| oId "CUFF.69925.15"; tss_id "TSS49987"; |           |   |   |   |                                                                             |
| chr3 Cufflinks exon197165341            | 197166013 | . | - | . | gene_id "XLOC_039663"; transcript_id "TCONS_00065958"; exon_number "1";     |
| oId "CUFF.69925.16"; tss_id "TSS49993"; |           |   |   |   |                                                                             |
| chr3 Cufflinks exon197171936            | 197172194 | . | - | . | gene_id "XLOC_039663"; transcript_id "TCONS_00065958"; exon_number "2";     |
| oId "CUFF.69925.16"; tss_id "TSS49993"; |           |   |   |   |                                                                             |
| chr3 Cufflinks exon197172495            | 197172681 | . | - | . | gene_id "XLOC_039663"; transcript_id "TCONS_00065958"; exon_number "3";     |
| oId "CUFF.69925.16"; tss_id "TSS49993"; |           |   |   |   |                                                                             |
| chr4 Cufflinks exon1243228              | 1243260   | . | + | . | gene_id "XLOC_039761"; transcript_id "TCONS_00066081"; exon_number "1"; oId |
| "CUFF.70191.1"; tss_id "TSS50113";      |           |   |   |   |                                                                             |
| chr4 Cufflinks exon1243899              | 1246795   | . | + | . | gene_id "XLOC_039761"; transcript_id "TCONS_00066081"; exon_number "2"; oId |
| "CUFF.70191.1"; tss_id "TSS50113";      |           |   |   |   |                                                                             |
| chr4 Cufflinks exon1859481              | 1860566   | . | + | . | gene_id "XLOC_039773"; transcript_id "TCONS_00066099"; exon_number "1"; oId |

"CUFF.70236.1"; tss\_id "TSS50125";  
chr4 Cufflinks exon1920920 1920983 . + . gene\_id "XLOC\_039773"; transcript\_id "TCONS\_00066099"; exon\_number "2"; oId  
"CUFF.70236.1"; tss\_id "TSS50125";  
chr4 Cufflinks exon1871865 1871946 . + . gene\_id "XLOC\_039777"; transcript\_id "TCONS\_00066103"; exon\_number "1"; oId  
"CUFF.70242.1"; tss\_id "TSS50129";  
chr4 Cufflinks exon1872174 1873034 . + . gene\_id "XLOC\_039777"; transcript\_id "TCONS\_00066103"; exon\_number "2"; oId  
"CUFF.70242.1"; tss\_id "TSS50129";  
chr4 Cufflinks exon4543858 4544202 . + . gene\_id "XLOC\_039826"; transcript\_id "TCONS\_00066204"; exon\_number "1"; oId  
"CUFF.70383.3"; tss\_id "TSS50200";  
chr4 Cufflinks exon4546465 4546634 . + . gene\_id "XLOC\_039826"; transcript\_id "TCONS\_00066204"; exon\_number "2"; oId  
"CUFF.70383.3"; tss\_id "TSS50200";  
chr4 Cufflinks exon4650704 4650836 . + . gene\_id "XLOC\_039826"; transcript\_id "TCONS\_00066204"; exon\_number "3"; oId  
"CUFF.70383.3"; tss\_id "TSS50200";  
chr4 Cufflinks exon4651097 4651269 . + . gene\_id "XLOC\_039826"; transcript\_id "TCONS\_00066204"; exon\_number "4"; oId  
"CUFF.70383.3"; tss\_id "TSS50200";  
chr4 Cufflinks exon4707400 4712675 . + . gene\_id "XLOC\_039826"; transcript\_id "TCONS\_00066204"; exon\_number "5"; oId  
"CUFF.70383.3"; tss\_id "TSS50200";  
chr4 Cufflinks exon4543858 4544202 . + . gene\_id "XLOC\_039826"; transcript\_id "TCONS\_00066206"; exon\_number "1"; oId  
"CUFF.70383.7"; tss\_id "TSS50200";  
chr4 Cufflinks exon4546465 4546634 . + . gene\_id "XLOC\_039826"; transcript\_id "TCONS\_00066206"; exon\_number "2"; oId  
"CUFF.70383.7"; tss\_id "TSS50200";  
chr4 Cufflinks exon4650704 4650836 . + . gene\_id "XLOC\_039826"; transcript\_id "TCONS\_00066206"; exon\_number "3"; oId  
"CUFF.70383.7"; tss\_id "TSS50200";  
chr4 Cufflinks exon4651100 4651269 . + . gene\_id "XLOC\_039826"; transcript\_id "TCONS\_00066206"; exon\_number "4"; oId  
"CUFF.70383.7"; tss\_id "TSS50200";  
chr4 Cufflinks exon4707400 4707637 . + . gene\_id "XLOC\_039826"; transcript\_id "TCONS\_00066206"; exon\_number "5"; oId  
"CUFF.70383.7"; tss\_id "TSS50200";  
chr4 Cufflinks exon4711243 4712675 . + . gene\_id "XLOC\_039826"; transcript\_id "TCONS\_00066206"; exon\_number "6"; oId  
"CUFF.70383.7"; tss\_id "TSS50200";  
chr4 Cufflinks exon4543858 4544202 . + . gene\_id "XLOC\_039826"; transcript\_id "TCONS\_00066207"; exon\_number "1"; oId  
"CUFF.70383.8"; tss\_id "TSS50200";  
chr4 Cufflinks exon4546465 4546634 . + . gene\_id "XLOC\_039826"; transcript\_id "TCONS\_00066207"; exon\_number "2"; oId  
"CUFF.70383.8"; tss\_id "TSS50200";  
chr4 Cufflinks exon4707400 4712675 . + . gene\_id "XLOC\_039826"; transcript\_id "TCONS\_00066207"; exon\_number "3"; oId  
"CUFF.70383.8"; tss\_id "TSS50200";  
chr4 Cufflinks exon4543858 4544202 . + . gene\_id "XLOC\_039826"; transcript\_id "TCONS\_00066205"; exon\_number "1"; oId  
"CUFF.70383.6"; tss\_id "TSS50200";  
chr4 Cufflinks exon4546465 4546634 . + . gene\_id "XLOC\_039826"; transcript\_id "TCONS\_00066205"; exon\_number "2"; oId  
"CUFF.70383.6"; tss\_id "TSS50200";  
chr4 Cufflinks exon4650704 4650836 . + . gene\_id "XLOC\_039826"; transcript\_id "TCONS\_00066205"; exon\_number "3"; oId  
"CUFF.70383.6"; tss\_id "TSS50200";  
chr4 Cufflinks exon4651100 4651269 . + . gene\_id "XLOC\_039826"; transcript\_id "TCONS\_00066205"; exon\_number "4"; oId  
"CUFF.70383.6"; tss\_id "TSS50200";

chr4 Cufflinks exon4702367 4702400 . + . gene\_id "XLOC\_039826"; transcript\_id "TCONS\_00066205"; exon\_number "5"; oId "CUFF.70383.6"; tss\_id "TSS50200";

chr4 Cufflinks exon4707400 4712675 . + . gene\_id "XLOC\_039826"; transcript\_id "TCONS\_00066205"; exon\_number "6"; oId "CUFF.70383.6"; tss\_id "TSS50200";

chr4 Cufflinks exon4543858 4544352 . + . gene\_id "XLOC\_039826"; transcript\_id "TCONS\_00066203"; exon\_number "1"; oId "CUFF.70383.2"; tss\_id "TSS50200";

chr4 Cufflinks exon4546465 4546634 . + . gene\_id "XLOC\_039826"; transcript\_id "TCONS\_00066203"; exon\_number "2"; oId "CUFF.70383.2"; tss\_id "TSS50200";

chr4 Cufflinks exon4650704 4650836 . + . gene\_id "XLOC\_039826"; transcript\_id "TCONS\_00066203"; exon\_number "3"; oId "CUFF.70383.2"; tss\_id "TSS50200";

chr4 Cufflinks exon4651100 4651269 . + . gene\_id "XLOC\_039826"; transcript\_id "TCONS\_00066203"; exon\_number "4"; oId "CUFF.70383.2"; tss\_id "TSS50200";

chr4 Cufflinks exon4707400 4707637 . + . gene\_id "XLOC\_039826"; transcript\_id "TCONS\_00066203"; exon\_number "5"; oId "CUFF.70383.2"; tss\_id "TSS50200";

chr4 Cufflinks exon4711243 4712675 . + . gene\_id "XLOC\_039826"; transcript\_id "TCONS\_00066203"; exon\_number "6"; oId "CUFF.70383.2"; tss\_id "TSS50200";

chr4 Cufflinks exon4543858 4544202 . + . gene\_id "XLOC\_039826"; transcript\_id "TCONS\_00066202"; exon\_number "1"; oId "CUFF.70383.1"; tss\_id "TSS50200";

chr4 Cufflinks exon4546465 4546634 . + . gene\_id "XLOC\_039826"; transcript\_id "TCONS\_00066202"; exon\_number "2"; oId "CUFF.70383.1"; tss\_id "TSS50200";

chr4 Cufflinks exon4650704 4650836 . + . gene\_id "XLOC\_039826"; transcript\_id "TCONS\_00066202"; exon\_number "3"; oId "CUFF.70383.1"; tss\_id "TSS50200";

chr4 Cufflinks exon4651100 4651269 . + . gene\_id "XLOC\_039826"; transcript\_id "TCONS\_00066202"; exon\_number "4"; oId "CUFF.70383.1"; tss\_id "TSS50200";

chr4 Cufflinks exon4707400 4712675 . + . gene\_id "XLOC\_039826"; transcript\_id "TCONS\_00066202"; exon\_number "5"; oId "CUFF.70383.1"; tss\_id "TSS50200";

chr4 Cufflinks exon 4666690 4666754 . + . gene\_id "XLOC\_039826"; transcript\_id "TCONS\_00066209"; exon\_number "1"; oId "CUFF.70383.10"; tss\_id "TSS50201";

chr4 Cufflinks exon 4707400 4711301 . + . gene\_id "XLOC\_039826"; transcript\_id "TCONS\_00066209"; exon\_number "2"; oId "CUFF.70383.10"; tss\_id "TSS50201";

chr4 Cufflinks exon 4731554 4732472 . + . gene\_id "XLOC\_039826"; transcript\_id "TCONS\_00066209"; exon\_number "3"; oId "CUFF.70383.10"; tss\_id "TSS50201";

chr4 Cufflinks exon 6765234 6765439 . + . gene\_id "XLOC\_039858"; transcript\_id "TCONS\_00066250"; exon\_number "1"; oId "CUFF.70519.1"; tss\_id "TSS50238";

chr4 Cufflinks exon 6766839 6767206 . + . gene\_id "XLOC\_039858"; transcript\_id "TCONS\_00066250"; exon\_number "2"; oId "CUFF.70519.1"; tss\_id "TSS50238";

chr4 Cufflinks exon 6765234 6765439 . + . gene\_id "XLOC\_039858"; transcript\_id "TCONS\_00066251"; exon\_number "1"; oId "CUFF.70519.2"; tss\_id "TSS50238";

chr4 Cufflinks exon 6769175 6769341 . + . gene\_id "XLOC\_039858"; transcript\_id "TCONS\_00066251"; exon\_number "2"; oId "CUFF.70519.2"; tss\_id "TSS50238";

chr4 Cufflinks exon 10458383 10458464 . + . gene\_id "XLOC\_039954"; transcript\_id "TCONS\_00066366"; exon\_number "1"; oId "CUFF.70761.1"; tss\_id "TSS50342";

chr4 Cufflinks exon 10463251 10464163 . + . gene\_id "XLOC\_039954"; transcript\_id "TCONS\_00066366";

exon\_number "2"; oId "CUFF.70761.1"; tss\_id "TSS50342";  
 chr4 Cufflinks exon 11150865 11151055 . + . gene\_id "XLOC\_039970"; transcript\_id "TCONS\_00066382";  
 exon\_number "1"; oId "CUFF.70776.6"; tss\_id "TSS50358";  
 chr4 Cufflinks exon 11163392 11163445 . + . gene\_id "XLOC\_039970"; transcript\_id "TCONS\_00066382";  
 exon\_number "2"; oId "CUFF.70776.6"; tss\_id "TSS50358";  
 chr4 Cufflinks exon 11189753 11193327 . + . gene\_id "XLOC\_039970"; transcript\_id "TCONS\_00066382";  
 exon\_number "3"; oId "CUFF.70776.6"; tss\_id "TSS50358";  
 chr4 Cufflinks exon 26859216 26859969 . + . gene\_id "XLOC\_040063"; transcript\_id "TCONS\_00066528";  
 exon\_number "1"; oId "CUFF.71378.1"; tss\_id "TSS50464";  
 chr4 Cufflinks exon 26860235 26860541 . + . gene\_id "XLOC\_040063"; transcript\_id "TCONS\_00066528";  
 exon\_number "2"; oId "CUFF.71378.1"; tss\_id "TSS50464";  
 chr4 Cufflinks exon 39529377 39529958 . + . gene\_id "XLOC\_040097"; transcript\_id "TCONS\_00066593";  
 exon\_number "1"; oId "CUFF.71515.3"; tss\_id "TSS50507";  
 chr4 Cufflinks exon 39533589 39534111 . + . gene\_id "XLOC\_040097"; transcript\_id "TCONS\_00066593";  
 exon\_number "2"; oId "CUFF.71515.3"; tss\_id "TSS50507";  
 chr4 Cufflinks exon 39583016 39583044 . + . gene\_id "XLOC\_040097"; transcript\_id "TCONS\_00066593";  
 exon\_number "3"; oId "CUFF.71515.3"; tss\_id "TSS50507";  
 chr4 Cufflinks exon 39529400 39530541 . + . gene\_id "XLOC\_040097"; transcript\_id "TCONS\_00066594";  
 exon\_number "1"; oId "CUFF.71515.4"; tss\_id "TSS50507";  
 chr4 Cufflinks exon 39530824 39531560 . + . gene\_id "XLOC\_040097"; transcript\_id "TCONS\_00066594";  
 exon\_number "2"; oId "CUFF.71515.4"; tss\_id "TSS50507";  
 chr4 Cufflinks exon 40186242 40186858 . + . gene\_id "XLOC\_040108"; transcript\_id "TCONS\_00066608";  
 exon\_number "1"; oId "CUFF.71547.1"; tss\_id "TSS50519";  
 chr4 Cufflinks exon 40188341 40188858 . + . gene\_id "XLOC\_040108"; transcript\_id "TCONS\_00066608";  
 exon\_number "2"; oId "CUFF.71547.1"; tss\_id "TSS50519";  
 chr4 Cufflinks exon 40191933 40192090 . + . gene\_id "XLOC\_040108"; transcript\_id "TCONS\_00066608";  
 exon\_number "3"; oId "CUFF.71547.1"; tss\_id "TSS50519";  
 chr4 Cufflinks exon 40186790 40186858 . + . gene\_id "XLOC\_040108"; transcript\_id "TCONS\_00066609";  
 exon\_number "1"; oId "CUFF.71547.3"; tss\_id "TSS50520";  
 chr4 Cufflinks exon40188697 40191109 . + . gene\_id "XLOC\_040108"; transcript\_id "TCONS\_00066609"; exon\_number "2";  
 oId "CUFF.71547.3"; tss\_id "TSS50520";  
 chr4 Cufflinks exon40191933 40192090 . + . gene\_id "XLOC\_040108"; transcript\_id "TCONS\_00066609"; exon\_number "3";  
 oId "CUFF.71547.3"; tss\_id "TSS50520";  
 chr4 Cufflinks exon40187285 40187931 . + . gene\_id "XLOC\_040108"; transcript\_id "TCONS\_00066611"; exon\_number "1";  
 oId "CUFF.71547.5"; tss\_id "TSS50522";  
 chr4 Cufflinks exon40255975 40256002 . + . gene\_id "XLOC\_040108"; transcript\_id "TCONS\_00066611"; exon\_number "2";  
 oId "CUFF.71547.5"; tss\_id "TSS50522";  
 chr4 Cufflinks exon40267675 40267749 . + . gene\_id "XLOC\_040113"; transcript\_id "TCONS\_00066617"; exon\_number "1";  
 oId "CUFF.71559.3"; tss\_id "TSS50528";  
 chr4 Cufflinks exon40328727 40328927 . + . gene\_id "XLOC\_040113"; transcript\_id "TCONS\_00066617"; exon\_number "2";  
 oId "CUFF.71559.3"; tss\_id "TSS50528";  
 chr4 Cufflinks exon40332177 40332436 . + . gene\_id "XLOC\_040113"; transcript\_id "TCONS\_00066617"; exon\_number "3";  
 oId "CUFF.71559.3"; tss\_id "TSS50528";



|                                         |          |   |   |   |                                                                         |
|-----------------------------------------|----------|---|---|---|-------------------------------------------------------------------------|
| chr4 Cufflinks exon40309202             | 40309503 | . | + | . | gene_id "XLOC_040113"; transcript_id "TCONS_00066620"; exon_number "1"; |
| oId "CUFF.71559.6"; tss_id "TSS50529";  |          |   |   |   |                                                                         |
| chr4 Cufflinks exon40310294             | 40310345 | . | + | . | gene_id "XLOC_040113"; transcript_id "TCONS_00066620"; exon_number "2"; |
| oId "CUFF.71559.6"; tss_id "TSS50529";  |          |   |   |   |                                                                         |
| chr4 Cufflinks exon40328727             | 40328927 | . | + | . | gene_id "XLOC_040113"; transcript_id "TCONS_00066620"; exon_number "3"; |
| oId "CUFF.71559.6"; tss_id "TSS50529";  |          |   |   |   |                                                                         |
| chr4 Cufflinks exon40332177             | 40332436 | . | + | . | gene_id "XLOC_040113"; transcript_id "TCONS_00066620"; exon_number "4"; |
| oId "CUFF.71559.6"; tss_id "TSS50529";  |          |   |   |   |                                                                         |
| chr4 Cufflinks exon40318502             | 40318544 | . | + | . | gene_id "XLOC_040113"; transcript_id "TCONS_00066625"; exon_number "1"; |
| oId "CUFF.71559.12"; tss_id "TSS50530"; |          |   |   |   |                                                                         |
| chr4 Cufflinks exon40328727             | 40328927 | . | + | . | gene_id "XLOC_040113"; transcript_id "TCONS_00066625"; exon_number "2"; |
| oId "CUFF.71559.12"; tss_id "TSS50530"; |          |   |   |   |                                                                         |
| chr4 Cufflinks exon40332177             | 40332436 | . | + | . | gene_id "XLOC_040113"; transcript_id "TCONS_00066625"; exon_number "3"; |
| oId "CUFF.71559.12"; tss_id "TSS50530"; |          |   |   |   |                                                                         |
| chr4 Cufflinks exon40318502             | 40318997 | . | + | . | gene_id "XLOC_040113"; transcript_id "TCONS_00066624"; exon_number "1"; |
| oId "CUFF.71559.11"; tss_id "TSS50530"; |          |   |   |   |                                                                         |
| chr4 Cufflinks exon40328727             | 40328927 | . | + | . | gene_id "XLOC_040113"; transcript_id "TCONS_00066624"; exon_number "2"; |
| oId "CUFF.71559.11"; tss_id "TSS50530"; |          |   |   |   |                                                                         |
| chr4 Cufflinks exon40332177             | 40332436 | . | + | . | gene_id "XLOC_040113"; transcript_id "TCONS_00066624"; exon_number "3"; |
| oId "CUFF.71559.11"; tss_id "TSS50530"; |          |   |   |   |                                                                         |
| chr4 Cufflinks exon41307874             | 41308009 | . | + | . | gene_id "XLOC_040122"; transcript_id "TCONS_00066638"; exon_number "1"; |
| oId "CUFF.71602.1"; tss_id "TSS50542";  |          |   |   |   |                                                                         |
| chr4 Cufflinks exon41308106             | 41308204 | . | + | . | gene_id "XLOC_040122"; transcript_id "TCONS_00066638"; exon_number "2"; |
| oId "CUFF.71602.1"; tss_id "TSS50542";  |          |   |   |   |                                                                         |
| chr4 Cufflinks exon41310032             | 41310533 | . | + | . | gene_id "XLOC_040122"; transcript_id "TCONS_00066638"; exon_number "3"; |
| oId "CUFF.71602.1"; tss_id "TSS50542";  |          |   |   |   |                                                                         |
| chr4 Cufflinks exon48271999             | 48272083 | . | + | . | gene_id "XLOC_040151"; transcript_id "TCONS_00066683"; exon_number "1"; |
| oId "CUFF.71725.2"; tss_id "TSS50574";  |          |   |   |   |                                                                         |
| chr4 Cufflinks exon48272159             | 48272334 | . | + | . | gene_id "XLOC_040151"; transcript_id "TCONS_00066683"; exon_number "2"; |
| oId "CUFF.71725.2"; tss_id "TSS50574";  |          |   |   |   |                                                                         |
| chr4 Cufflinks exon48281596             | 48281697 | . | + | . | gene_id "XLOC_040151"; transcript_id "TCONS_00066683"; exon_number "3"; |
| oId "CUFF.71725.2"; tss_id "TSS50574";  |          |   |   |   |                                                                         |
| chr4 Cufflinks exon48290138             | 48290204 | . | + | . | gene_id "XLOC_040151"; transcript_id "TCONS_00066683"; exon_number "4"; |
| oId "CUFF.71725.2"; tss_id "TSS50574";  |          |   |   |   |                                                                         |
| chr4 Cufflinks exon48293842             | 48294562 | . | + | . | gene_id "XLOC_040151"; transcript_id "TCONS_00066683"; exon_number "5"; |
| oId "CUFF.71725.2"; tss_id "TSS50574";  |          |   |   |   |                                                                         |
| chr4 Cufflinks exon48297775             | 48299791 | . | + | . | gene_id "XLOC_040151"; transcript_id "TCONS_00066683"; exon_number "6"; |
| oId "CUFF.71725.2"; tss_id "TSS50574";  |          |   |   |   |                                                                         |
| chr4 Cufflinks exon48272003             | 48272083 | . | + | . | gene_id "XLOC_040151"; transcript_id "TCONS_00066684"; exon_number "1"; |
| oId "CUFF.71725.3"; tss_id "TSS50574";  |          |   |   |   |                                                                         |
| chr4 Cufflinks exon48281596             | 48281697 | . | + | . | gene_id "XLOC_040151"; transcript_id "TCONS_00066684"; exon_number "2"; |
| oId "CUFF.71725.3"; tss_id "TSS50574";  |          |   |   |   |                                                                         |
| chr4 Cufflinks exon48293818             | 48294562 | . | + | . | gene_id "XLOC_040151"; transcript_id "TCONS_00066684"; exon_number "3"; |

|                                                                                 |   |   |   |                                                                         |
|---------------------------------------------------------------------------------|---|---|---|-------------------------------------------------------------------------|
| oId "CUFF.71725.3"; tss_id "TSS50574";<br>chr4 Cufflinks exon48297775 48299791  | . | + | . | gene_id "XLOC_040151"; transcript_id "TCONS_00066684"; exon_number "4"; |
| oId "CUFF.71725.3"; tss_id "TSS50574";<br>chr4 Cufflinks exon48272026 48272083  | . | + | . | gene_id "XLOC_040151"; transcript_id "TCONS_00066685"; exon_number "1"; |
| oId "CUFF.71725.6"; tss_id "TSS50574";<br>chr4 Cufflinks exon48293818 48294562  | . | + | . | gene_id "XLOC_040151"; transcript_id "TCONS_00066685"; exon_number "2"; |
| oId "CUFF.71725.6"; tss_id "TSS50574";<br>chr4 Cufflinks exon48297775 48299791  | . | + | . | gene_id "XLOC_040151"; transcript_id "TCONS_00066685"; exon_number "3"; |
| oId "CUFF.71725.6"; tss_id "TSS50574";<br>chr4 Cufflinks exon48272086 48272334  | . | + | . | gene_id "XLOC_040151"; transcript_id "TCONS_00066686"; exon_number "1"; |
| oId "CUFF.71725.10"; tss_id "TSS50574";<br>chr4 Cufflinks exon48293818 48294859 | . | + | . | gene_id "XLOC_040151"; transcript_id "TCONS_00066686"; exon_number "2"; |
| oId "CUFF.71725.10"; tss_id "TSS50574";<br>chr4 Cufflinks exon48297775 48299791 | . | + | . | gene_id "XLOC_040151"; transcript_id "TCONS_00066686"; exon_number "3"; |
| oId "CUFF.71725.10"; tss_id "TSS50574";<br>chr4 Cufflinks exon48272247 48272334 | . | + | . | gene_id "XLOC_040151"; transcript_id "TCONS_00066687"; exon_number "1"; |
| oId "CUFF.71725.11"; tss_id "TSS50575";<br>chr4 Cufflinks exon48293818 48294447 | . | + | . | gene_id "XLOC_040151"; transcript_id "TCONS_00066687"; exon_number "2"; |
| oId "CUFF.71725.11"; tss_id "TSS50575";<br>chr4 Cufflinks exon48297775 48299791 | . | + | . | gene_id "XLOC_040151"; transcript_id "TCONS_00066687"; exon_number "3"; |
| oId "CUFF.71725.11"; tss_id "TSS50575";<br>chr4 Cufflinks exon49314831 49314867 | . | + | . | gene_id "XLOC_040164"; transcript_id "TCONS_00066707"; exon_number "1"; |
| oId "CUFF.71781.1"; tss_id "TSS50591";<br>chr4 Cufflinks exon49328063 49328237  | . | + | . | gene_id "XLOC_040164"; transcript_id "TCONS_00066707"; exon_number "2"; |
| oId "CUFF.71781.1"; tss_id "TSS50591";<br>chr4 Cufflinks exon53578621 53578694  | . | + | . | gene_id "XLOC_040177"; transcript_id "TCONS_00066723"; exon_number "1"; |
| oId "CUFF.71818.1"; tss_id "TSS50606";<br>chr4 Cufflinks exon53578991 53579126  | . | + | . | gene_id "XLOC_040177"; transcript_id "TCONS_00066723"; exon_number "2"; |
| oId "CUFF.71818.1"; tss_id "TSS50606";<br>chr4 Cufflinks exon53579661 53580305  | . | + | . | gene_id "XLOC_040177"; transcript_id "TCONS_00066723"; exon_number "3"; |
| oId "CUFF.71818.1"; tss_id "TSS50606";<br>chr4 Cufflinks exon71544529 71544590  | . | + | . | gene_id "XLOC_040267"; transcript_id "TCONS_00066846"; exon_number "1"; |
| oId "CUFF.72126.1"; tss_id "TSS50702";<br>chr4 Cufflinks exon71544894 71544994  | . | + | . | gene_id "XLOC_040267"; transcript_id "TCONS_00066846"; exon_number "2"; |
| oId "CUFF.72126.1"; tss_id "TSS50702";<br>chr4 Cufflinks exon71547216 71547316  | . | + | . | gene_id "XLOC_040267"; transcript_id "TCONS_00066846"; exon_number "3"; |
| oId "CUFF.72126.1"; tss_id "TSS50702";<br>chr4 Cufflinks exon71547883 71548154  | . | + | . | gene_id "XLOC_040267"; transcript_id "TCONS_00066846"; exon_number "4"; |
| oId "CUFF.72126.1"; tss_id "TSS50702";<br>chr4 Cufflinks exon74124901 74125125  | . | + | . | gene_id "XLOC_040285"; transcript_id "TCONS_00066870"; exon_number "1"; |
| oId "CUFF.72202.1"; tss_id "TSS50724";<br>chr4 Cufflinks exon74167981 74168102  | . | + | . | gene_id "XLOC_040285"; transcript_id "TCONS_00066870"; exon_number "2"; |
| oId "CUFF.72202.1"; tss_id "TSS50724";                                          |   |   |   |                                                                         |

|                                        |          |   |   |   |                                                                         |
|----------------------------------------|----------|---|---|---|-------------------------------------------------------------------------|
| chr4 Cufflinks exon74183544            | 74184376 | . | + | . | gene_id "XLOC_040285"; transcript_id "TCONS_00066870"; exon_number "3"; |
| oId "CUFF.72202.1"; tss_id "TSS50724"; |          |   |   |   |                                                                         |
| chr4 Cufflinks exon74904307            | 74904555 | . | + | . | gene_id "XLOC_040299"; transcript_id "TCONS_00066887"; exon_number "1"; |
| oId "CUFF.72240.2"; tss_id "TSS50739"; |          |   |   |   |                                                                         |
| chr4 Cufflinks exon74907205            | 74908400 | . | + | . | gene_id "XLOC_040299"; transcript_id "TCONS_00066887"; exon_number "2"; |
| oId "CUFF.72240.2"; tss_id "TSS50739"; |          |   |   |   |                                                                         |
| chr4 Cufflinks exon79860641            | 79860890 | . | + | . | gene_id "XLOC_040349"; transcript_id "TCONS_00066972"; exon_number "1"; |
| oId "CUFF.72416.1"; tss_id "TSS50805"; |          |   |   |   |                                                                         |
| chr4 Cufflinks exon79869733            | 79869830 | . | + | . | gene_id "XLOC_040349"; transcript_id "TCONS_00066972"; exon_number "2"; |
| oId "CUFF.72416.1"; tss_id "TSS50805"; |          |   |   |   |                                                                         |
| chr4 Cufflinks exon79869939            | 79870026 | . | + | . | gene_id "XLOC_040349"; transcript_id "TCONS_00066972"; exon_number "3"; |
| oId "CUFF.72416.1"; tss_id "TSS50805"; |          |   |   |   |                                                                         |
| chr4 Cufflinks exon79878045            | 79878083 | . | + | . | gene_id "XLOC_040349"; transcript_id "TCONS_00066972"; exon_number "4"; |
| oId "CUFF.72416.1"; tss_id "TSS50805"; |          |   |   |   |                                                                         |
| chr4 Cufflinks exon79860645            | 79860890 | . | + | . | gene_id "XLOC_040349"; transcript_id "TCONS_00066976"; exon_number "1"; |
| oId "CUFF.72416.6"; tss_id "TSS50805"; |          |   |   |   |                                                                         |
| chr4 Cufflinks exon79869733            | 79869830 | . | + | . | gene_id "XLOC_040349"; transcript_id "TCONS_00066976"; exon_number "2"; |
| oId "CUFF.72416.6"; tss_id "TSS50805"; |          |   |   |   |                                                                         |
| chr4 Cufflinks exon79869939            | 79870026 | . | + | . | gene_id "XLOC_040349"; transcript_id "TCONS_00066976"; exon_number "3"; |
| oId "CUFF.72416.6"; tss_id "TSS50805"; |          |   |   |   |                                                                         |
| chr4 Cufflinks exon80007250            | 80007416 | . | + | . | gene_id "XLOC_040349"; transcript_id "TCONS_00066976"; exon_number "4"; |
| oId "CUFF.72416.6"; tss_id "TSS50805"; |          |   |   |   |                                                                         |
| chr4 Cufflinks exon80116990            | 80117086 | . | + | . | gene_id "XLOC_040349"; transcript_id "TCONS_00066976"; exon_number "5"; |
| oId "CUFF.72416.6"; tss_id "TSS50805"; |          |   |   |   |                                                                         |
| chr4 Cufflinks exon80227845            | 80227882 | . | + | . | gene_id "XLOC_040349"; transcript_id "TCONS_00066976"; exon_number "6"; |
| oId "CUFF.72416.6"; tss_id "TSS50805"; |          |   |   |   |                                                                         |
| chr4 Cufflinks exon80229427            | 80229953 | . | + | . | gene_id "XLOC_040349"; transcript_id "TCONS_00066976"; exon_number "7"; |
| oId "CUFF.72416.6"; tss_id "TSS50805"; |          |   |   |   |                                                                         |
| chr4 Cufflinks exon79860645            | 79860890 | . | + | . | gene_id "XLOC_040349"; transcript_id "TCONS_00066975"; exon_number "1"; |
| oId "CUFF.72416.5"; tss_id "TSS50805"; |          |   |   |   |                                                                         |
| chr4 Cufflinks exon79869717            | 79869830 | . | + | . | gene_id "XLOC_040349"; transcript_id "TCONS_00066975"; exon_number "2"; |
| oId "CUFF.72416.5"; tss_id "TSS50805"; |          |   |   |   |                                                                         |
| chr4 Cufflinks exon79869939            | 79870026 | . | + | . | gene_id "XLOC_040349"; transcript_id "TCONS_00066975"; exon_number "3"; |
| oId "CUFF.72416.5"; tss_id "TSS50805"; |          |   |   |   |                                                                         |
| chr4 Cufflinks exon80007250            | 80007416 | . | + | . | gene_id "XLOC_040349"; transcript_id "TCONS_00066975"; exon_number "4"; |
| oId "CUFF.72416.5"; tss_id "TSS50805"; |          |   |   |   |                                                                         |
| chr4 Cufflinks exon80116990            | 80117086 | . | + | . | gene_id "XLOC_040349"; transcript_id "TCONS_00066975"; exon_number "5"; |
| oId "CUFF.72416.5"; tss_id "TSS50805"; |          |   |   |   |                                                                         |
| chr4 Cufflinks exon80227845            | 80227882 | . | + | . | gene_id "XLOC_040349"; transcript_id "TCONS_00066975"; exon_number "6"; |
| oId "CUFF.72416.5"; tss_id "TSS50805"; |          |   |   |   |                                                                         |
| chr4 Cufflinks exon80229427            | 80229953 | . | + | . | gene_id "XLOC_040349"; transcript_id "TCONS_00066975"; exon_number "7"; |
| oId "CUFF.72416.5"; tss_id "TSS50805"; |          |   |   |   |                                                                         |
| chr4 Cufflinks exon79860645            | 79860890 | . | + | . | gene_id "XLOC_040349"; transcript_id "TCONS_00066974"; exon_number "1"; |



|                                         |           |   |   |   |                                                                         |
|-----------------------------------------|-----------|---|---|---|-------------------------------------------------------------------------|
| chr4 Cufflinks exon80229428             | 80229953  | . | + | . | gene_id "XLOC_040349"; transcript_id "TCONS_00066977"; exon_number "6"; |
| oId "CUFF.72416.10"; tss_id "TSS50805"; |           |   |   |   |                                                                         |
| chr4 Cufflinks exon79892902             | 79893030  | . | + | . | gene_id "XLOC_040349"; transcript_id "TCONS_00066979"; exon_number "1"; |
| oId "CUFF.72416.14"; tss_id "TSS50806"; |           |   |   |   |                                                                         |
| chr4 Cufflinks exon79894154             | 79894206  | . | + | . | gene_id "XLOC_040349"; transcript_id "TCONS_00066979"; exon_number "2"; |
| oId "CUFF.72416.14"; tss_id "TSS50806"; |           |   |   |   |                                                                         |
| chr4 Cufflinks exon80007250             | 80007416  | . | + | . | gene_id "XLOC_040349"; transcript_id "TCONS_00066979"; exon_number "3"; |
| oId "CUFF.72416.14"; tss_id "TSS50806"; |           |   |   |   |                                                                         |
| chr4 Cufflinks exon80116990             | 80117086  | . | + | . | gene_id "XLOC_040349"; transcript_id "TCONS_00066979"; exon_number "4"; |
| oId "CUFF.72416.14"; tss_id "TSS50806"; |           |   |   |   |                                                                         |
| chr4 Cufflinks exon80227845             | 80227882  | . | + | . | gene_id "XLOC_040349"; transcript_id "TCONS_00066979"; exon_number "5"; |
| oId "CUFF.72416.14"; tss_id "TSS50806"; |           |   |   |   |                                                                         |
| chr4 Cufflinks exon80229427             | 80229953  | . | + | . | gene_id "XLOC_040349"; transcript_id "TCONS_00066979"; exon_number "6"; |
| oId "CUFF.72416.14"; tss_id "TSS50806"; |           |   |   |   |                                                                         |
| chr4 Cufflinks exon80118702             | 80118798  | . | + | . | gene_id "XLOC_040349"; transcript_id "TCONS_00066980"; exon_number "1"; |
| oId "CUFF.72416.15"; tss_id "TSS50807"; |           |   |   |   |                                                                         |
| chr4 Cufflinks exon80227845             | 80227882  | . | + | . | gene_id "XLOC_040349"; transcript_id "TCONS_00066980"; exon_number "2"; |
| oId "CUFF.72416.15"; tss_id "TSS50807"; |           |   |   |   |                                                                         |
| chr4 Cufflinks exon80229427             | 80229953  | . | + | . | gene_id "XLOC_040349"; transcript_id "TCONS_00066980"; exon_number "3"; |
| oId "CUFF.72416.15"; tss_id "TSS50807"; |           |   |   |   |                                                                         |
| chr4 Cufflinks exon89630940             | 89631416  | . | + | . | gene_id "XLOC_040411"; transcript_id "TCONS_00067086"; exon_number "1"; |
| oId "CUFF.72691.1"; tss_id "TSS50888";  |           |   |   |   |                                                                         |
| chr4 Cufflinks exon89633006             | 89633168  | . | + | . | gene_id "XLOC_040411"; transcript_id "TCONS_00067086"; exon_number "2"; |
| oId "CUFF.72691.1"; tss_id "TSS50888";  |           |   |   |   |                                                                         |
| chr4 Cufflinks exon89643302             | 89643495  | . | + | . | gene_id "XLOC_040411"; transcript_id "TCONS_00067086"; exon_number "3"; |
| oId "CUFF.72691.1"; tss_id "TSS50888";  |           |   |   |   |                                                                         |
| chr4 Cufflinks exon89644360             | 89644466  | . | + | . | gene_id "XLOC_040411"; transcript_id "TCONS_00067086"; exon_number "4"; |
| oId "CUFF.72691.1"; tss_id "TSS50888";  |           |   |   |   |                                                                         |
| chr4 Cufflinks exon89648986             | 89651254  | . | + | . | gene_id "XLOC_040411"; transcript_id "TCONS_00067086"; exon_number "5"; |
| oId "CUFF.72691.1"; tss_id "TSS50888";  |           |   |   |   |                                                                         |
| chr4 Cufflinks exon89638525             | 89644466  | . | + | . | gene_id "XLOC_040411"; transcript_id "TCONS_00067087"; exon_number "1"; |
| oId "CUFF.72691.2"; tss_id "TSS50889";  |           |   |   |   |                                                                         |
| chr4 Cufflinks exon89648986             | 89651254  | . | + | . | gene_id "XLOC_040411"; transcript_id "TCONS_00067087"; exon_number "2"; |
| oId "CUFF.72691.2"; tss_id "TSS50889";  |           |   |   |   |                                                                         |
| chr4 Cufflinks exon100009983            | 100010435 | . | + | . | gene_id "XLOC_040456"; transcript_id "TCONS_00067153"; exon_number "1"; |
| oId "CUFF.72844.1"; tss_id "TSS50941";  |           |   |   |   |                                                                         |
| chr4 Cufflinks exon100023919            | 100024263 | . | + | . | gene_id "XLOC_040456"; transcript_id "TCONS_00067153"; exon_number "2"; |
| oId "CUFF.72844.1"; tss_id "TSS50941";  |           |   |   |   |                                                                         |
| chr4 Cufflinks exon100009983            | 100010435 | . | + | . | gene_id "XLOC_040456"; transcript_id "TCONS_00067154"; exon_number "1"; |
| oId "CUFF.72844.2"; tss_id "TSS50941";  |           |   |   |   |                                                                         |
| chr4 Cufflinks exon100054706            | 100054956 | . | + | . | gene_id "XLOC_040456"; transcript_id "TCONS_00067154"; exon_number "2"; |
| oId "CUFF.72844.2"; tss_id "TSS50941";  |           |   |   |   |                                                                         |
| chr4 Cufflinks exon100078648            | 100078736 | . | + | . | gene_id "XLOC_040456"; transcript_id "TCONS_00067154"; exon_number "3"; |

oId "CUFF.72844.2"; tss\_id "TSS50941";  
chr4 Cufflinks exon100109802 100109843 . + . gene\_id "XLOC\_040456"; transcript\_id "TCONS\_00067154"; exon\_number "4";  
oId "CUFF.72844.2"; tss\_id "TSS50941";  
chr4 Cufflinks exon100009983 100010435 . + . gene\_id "XLOC\_040456"; transcript\_id "TCONS\_00067155"; exon\_number "1";  
oId "CUFF.72844.3"; tss\_id "TSS50941";  
chr4 Cufflinks exon100054706 100054956 . + . gene\_id "XLOC\_040456"; transcript\_id "TCONS\_00067155"; exon\_number "2";  
oId "CUFF.72844.3"; tss\_id "TSS50941";  
chr4 Cufflinks exon100075711 100078736 . + . gene\_id "XLOC\_040456"; transcript\_id "TCONS\_00067155"; exon\_number "3";  
oId "CUFF.72844.3"; tss\_id "TSS50941";  
chr4 Cufflinks exon100125514 100125588 . + . gene\_id "XLOC\_040456"; transcript\_id "TCONS\_00067155"; exon\_number "4";  
oId "CUFF.72844.3"; tss\_id "TSS50941";  
chr4 Cufflinks exon100128572 100131670 . + . gene\_id "XLOC\_040456"; transcript\_id "TCONS\_00067155"; exon\_number "5";  
oId "CUFF.72844.3"; tss\_id "TSS50941";  
chr4 Cufflinks exon100009984 100010435 . + . gene\_id "XLOC\_040456"; transcript\_id "TCONS\_00067156"; exon\_number "1";  
oId "CUFF.72844.4"; tss\_id "TSS50941";  
chr4 Cufflinks exon100023532 100023816 . + . gene\_id "XLOC\_040456"; transcript\_id "TCONS\_00067156"; exon\_number "2";  
oId "CUFF.72844.4"; tss\_id "TSS50941";  
chr4 Cufflinks exon100023919 100024263 . + . gene\_id "XLOC\_040456"; transcript\_id "TCONS\_00067156"; exon\_number "3";  
oId "CUFF.72844.4"; tss\_id "TSS50941";  
chr4 Cufflinks exon100009984 100010435 . + . gene\_id "XLOC\_040456"; transcript\_id "TCONS\_00067157"; exon\_number "1";  
oId "CUFF.72844.5"; tss\_id "TSS50941";  
chr4 Cufflinks exon100054706 100054956 . + . gene\_id "XLOC\_040456"; transcript\_id "TCONS\_00067157"; exon\_number "2";  
oId "CUFF.72844.5"; tss\_id "TSS50941";  
chr4 Cufflinks exon100075702 100078736 . + . gene\_id "XLOC\_040456"; transcript\_id "TCONS\_00067157"; exon\_number "3";  
oId "CUFF.72844.5"; tss\_id "TSS50941";  
chr4 Cufflinks exon100125514 100125588 . + . gene\_id "XLOC\_040456"; transcript\_id "TCONS\_00067157"; exon\_number "4";  
oId "CUFF.72844.5"; tss\_id "TSS50941";  
chr4 Cufflinks exon100128572 100131670 . + . gene\_id "XLOC\_040456"; transcript\_id "TCONS\_00067157"; exon\_number "5";  
oId "CUFF.72844.5"; tss\_id "TSS50941";  
chr4 Cufflinks exon100009984 100010435 . + . gene\_id "XLOC\_040456"; transcript\_id "TCONS\_00067159"; exon\_number "1";  
oId "CUFF.72844.7"; tss\_id "TSS50941";  
chr4 Cufflinks exon100054706 100054956 . + . gene\_id "XLOC\_040456"; transcript\_id "TCONS\_00067159"; exon\_number "2";  
oId "CUFF.72844.7"; tss\_id "TSS50941";  
chr4 Cufflinks exon100075711 100078736 . + . gene\_id "XLOC\_040456"; transcript\_id "TCONS\_00067159"; exon\_number "3";  
oId "CUFF.72844.7"; tss\_id "TSS50941";  
chr4 Cufflinks exon100125514 100125588 . + . gene\_id "XLOC\_040456"; transcript\_id "TCONS\_00067159"; exon\_number "4";  
oId "CUFF.72844.7"; tss\_id "TSS50941";  
chr4 Cufflinks exon100207952 100208190 . + . gene\_id "XLOC\_040456"; transcript\_id "TCONS\_00067159"; exon\_number "5";  
oId "CUFF.72844.7"; tss\_id "TSS50941";  
chr4 Cufflinks exon100209823 100209942 . + . gene\_id "XLOC\_040456"; transcript\_id "TCONS\_00067159"; exon\_number "6";  
oId "CUFF.72844.7"; tss\_id "TSS50941";  
chr4 Cufflinks exon100212094 100212105 . + . gene\_id "XLOC\_040456"; transcript\_id "TCONS\_00067159"; exon\_number "7";  
oId "CUFF.72844.7"; tss\_id "TSS50941";

|                                        |           |   |   |   |                                                                          |
|----------------------------------------|-----------|---|---|---|--------------------------------------------------------------------------|
| chr4 Cufflinks exon100221456           | 100221527 | . | + | . | gene_id "XLOC_040456"; transcript_id "TCONS_00067159"; exon_number "8";  |
| oId "CUFF.72844.7"; tss_id "TSS50941"; |           |   |   |   |                                                                          |
| chr4 Cufflinks exon100221626           | 100221812 | . | + | . | gene_id "XLOC_040456"; transcript_id "TCONS_00067159"; exon_number "9";  |
| oId "CUFF.72844.7"; tss_id "TSS50941"; |           |   |   |   |                                                                          |
| chr4 Cufflinks exon100222108           | 100222513 | . | + | . | gene_id "XLOC_040456"; transcript_id "TCONS_00067159"; exon_number "10"; |
| oId "CUFF.72844.7"; tss_id "TSS50941"; |           |   |   |   |                                                                          |
| chr4 Cufflinks exon100009984           | 100010435 | . | + | . | gene_id "XLOC_040456"; transcript_id "TCONS_00067158"; exon_number "1";  |
| oId "CUFF.72844.6"; tss_id "TSS50941"; |           |   |   |   |                                                                          |
| chr4 Cufflinks exon100054706           | 100054956 | . | + | . | gene_id "XLOC_040456"; transcript_id "TCONS_00067158"; exon_number "2";  |
| oId "CUFF.72844.6"; tss_id "TSS50941"; |           |   |   |   |                                                                          |
| chr4 Cufflinks exon100075702           | 100078736 | . | + | . | gene_id "XLOC_040456"; transcript_id "TCONS_00067158"; exon_number "3";  |
| oId "CUFF.72844.6"; tss_id "TSS50941"; |           |   |   |   |                                                                          |
| chr4 Cufflinks exon100125514           | 100125588 | . | + | . | gene_id "XLOC_040456"; transcript_id "TCONS_00067158"; exon_number "4";  |
| oId "CUFF.72844.6"; tss_id "TSS50941"; |           |   |   |   |                                                                          |
| chr4 Cufflinks exon100207952           | 100208190 | . | + | . | gene_id "XLOC_040456"; transcript_id "TCONS_00067158"; exon_number "5";  |
| oId "CUFF.72844.6"; tss_id "TSS50941"; |           |   |   |   |                                                                          |
| chr4 Cufflinks exon100209823           | 100209942 | . | + | . | gene_id "XLOC_040456"; transcript_id "TCONS_00067158"; exon_number "6";  |
| oId "CUFF.72844.6"; tss_id "TSS50941"; |           |   |   |   |                                                                          |
| chr4 Cufflinks exon100212094           | 100212162 | . | + | . | gene_id "XLOC_040456"; transcript_id "TCONS_00067158"; exon_number "7";  |
| oId "CUFF.72844.6"; tss_id "TSS50941"; |           |   |   |   |                                                                          |
| chr4 Cufflinks exon100221465           | 100221527 | . | + | . | gene_id "XLOC_040456"; transcript_id "TCONS_00067158"; exon_number "8";  |
| oId "CUFF.72844.6"; tss_id "TSS50941"; |           |   |   |   |                                                                          |
| chr4 Cufflinks exon100221626           | 100221812 | . | + | . | gene_id "XLOC_040456"; transcript_id "TCONS_00067158"; exon_number "9";  |
| oId "CUFF.72844.6"; tss_id "TSS50941"; |           |   |   |   |                                                                          |
| chr4 Cufflinks exon100222108           | 100222513 | . | + | . | gene_id "XLOC_040456"; transcript_id "TCONS_00067158"; exon_number "10"; |
| oId "CUFF.72844.6"; tss_id "TSS50941"; |           |   |   |   |                                                                          |
| chr4 Cufflinks exon100010008           | 100010435 | . | + | . | gene_id "XLOC_040456"; transcript_id "TCONS_00067160"; exon_number "1";  |
| oId "CUFF.72844.8"; tss_id "TSS50941"; |           |   |   |   |                                                                          |
| chr4 Cufflinks exon100023532           | 100023675 | . | + | . | gene_id "XLOC_040456"; transcript_id "TCONS_00067160"; exon_number "2";  |
| oId "CUFF.72844.8"; tss_id "TSS50941"; |           |   |   |   |                                                                          |
| chr4 Cufflinks exon100023919           | 100024263 | . | + | . | gene_id "XLOC_040456"; transcript_id "TCONS_00067160"; exon_number "3";  |
| oId "CUFF.72844.8"; tss_id "TSS50941"; |           |   |   |   |                                                                          |
| chr4 Cufflinks exon100010008           | 100010435 | . | + | . | gene_id "XLOC_040456"; transcript_id "TCONS_00067161"; exon_number "1";  |
| oId "CUFF.72844.9"; tss_id "TSS50941"; |           |   |   |   |                                                                          |
| chr4 Cufflinks exon100054706           | 100054956 | . | + | . | gene_id "XLOC_040456"; transcript_id "TCONS_00067161"; exon_number "2";  |
| oId "CUFF.72844.9"; tss_id "TSS50941"; |           |   |   |   |                                                                          |
| chr4 Cufflinks exon100075702           | 100078736 | . | + | . | gene_id "XLOC_040456"; transcript_id "TCONS_00067161"; exon_number "3";  |
| oId "CUFF.72844.9"; tss_id "TSS50941"; |           |   |   |   |                                                                          |
| chr4 Cufflinks exon100125514           | 100125591 | . | + | . | gene_id "XLOC_040456"; transcript_id "TCONS_00067161"; exon_number "4";  |
| oId "CUFF.72844.9"; tss_id "TSS50941"; |           |   |   |   |                                                                          |
| chr4 Cufflinks exon100128575           | 100131670 | . | + | . | gene_id "XLOC_040456"; transcript_id "TCONS_00067161"; exon_number "5";  |
| oId "CUFF.72844.9"; tss_id "TSS50941"; |           |   |   |   |                                                                          |
| chr4 Cufflinks exon100010008           | 100010435 | . | + | . | gene_id "XLOC_040456"; transcript_id "TCONS_00067164"; exon_number "1";  |

oId "CUFF.72844.12"; tss\_id "TSS50941";  
chr4 Cufflinks exon100054706 100054956 . + . gene\_id "XLOC\_040456"; transcript\_id "TCONS\_00067164"; exon\_number "2";  
oId "CUFF.72844.12"; tss\_id "TSS50941";  
chr4 Cufflinks exon100075702 100078736 . + . gene\_id "XLOC\_040456"; transcript\_id "TCONS\_00067164"; exon\_number "3";  
oId "CUFF.72844.12"; tss\_id "TSS50941";  
chr4 Cufflinks exon100125514 100125588 . + . gene\_id "XLOC\_040456"; transcript\_id "TCONS\_00067164"; exon\_number "4";  
oId "CUFF.72844.12"; tss\_id "TSS50941";  
chr4 Cufflinks exon100207952 100208190 . + . gene\_id "XLOC\_040456"; transcript\_id "TCONS\_00067164"; exon\_number "5";  
oId "CUFF.72844.12"; tss\_id "TSS50941";  
chr4 Cufflinks exon100209823 100209942 . + . gene\_id "XLOC\_040456"; transcript\_id "TCONS\_00067164"; exon\_number "6";  
oId "CUFF.72844.12"; tss\_id "TSS50941";  
chr4 Cufflinks exon100212094 100212105 . + . gene\_id "XLOC\_040456"; transcript\_id "TCONS\_00067164"; exon\_number "7";  
oId "CUFF.72844.12"; tss\_id "TSS50941";  
chr4 Cufflinks exon100221456 100221527 . + . gene\_id "XLOC\_040456"; transcript\_id "TCONS\_00067164"; exon\_number "8";  
oId "CUFF.72844.12"; tss\_id "TSS50941";  
chr4 Cufflinks exon100221626 100221812 . + . gene\_id "XLOC\_040456"; transcript\_id "TCONS\_00067164"; exon\_number "9";  
oId "CUFF.72844.12"; tss\_id "TSS50941";  
chr4 Cufflinks exon100222108 100222513 . + . gene\_id "XLOC\_040456"; transcript\_id "TCONS\_00067164"; exon\_number "10";  
oId "CUFF.72844.12"; tss\_id "TSS50941";  
chr4 Cufflinks exon100010008 100010435 . + . gene\_id "XLOC\_040456"; transcript\_id "TCONS\_00067163"; exon\_number "1";  
oId "CUFF.72844.11"; tss\_id "TSS50941";  
chr4 Cufflinks exon100054706 100054956 . + . gene\_id "XLOC\_040456"; transcript\_id "TCONS\_00067163"; exon\_number "2";  
oId "CUFF.72844.11"; tss\_id "TSS50941";  
chr4 Cufflinks exon100075711 100078736 . + . gene\_id "XLOC\_040456"; transcript\_id "TCONS\_00067163"; exon\_number "3";  
oId "CUFF.72844.11"; tss\_id "TSS50941";  
chr4 Cufflinks exon100098271 100098388 . + . gene\_id "XLOC\_040456"; transcript\_id "TCONS\_00067163"; exon\_number "4";  
oId "CUFF.72844.11"; tss\_id "TSS50941";  
chr4 Cufflinks exon100125514 100125588 . + . gene\_id "XLOC\_040456"; transcript\_id "TCONS\_00067163"; exon\_number "5";  
oId "CUFF.72844.11"; tss\_id "TSS50941";  
chr4 Cufflinks exon100207952 100208190 . + . gene\_id "XLOC\_040456"; transcript\_id "TCONS\_00067163"; exon\_number "6";  
oId "CUFF.72844.11"; tss\_id "TSS50941";  
chr4 Cufflinks exon100209823 100209942 . + . gene\_id "XLOC\_040456"; transcript\_id "TCONS\_00067163"; exon\_number "7";  
oId "CUFF.72844.11"; tss\_id "TSS50941";  
chr4 Cufflinks exon100212094 100212162 . + . gene\_id "XLOC\_040456"; transcript\_id "TCONS\_00067163"; exon\_number "8";  
oId "CUFF.72844.11"; tss\_id "TSS50941";  
chr4 Cufflinks exon100221456 100221527 . + . gene\_id "XLOC\_040456"; transcript\_id "TCONS\_00067163"; exon\_number "9";  
oId "CUFF.72844.11"; tss\_id "TSS50941";  
chr4 Cufflinks exon100221626 100221812 . + . gene\_id "XLOC\_040456"; transcript\_id "TCONS\_00067163"; exon\_number "10";  
oId "CUFF.72844.11"; tss\_id "TSS50941";  
chr4 Cufflinks exon100222108 100222513 . + . gene\_id "XLOC\_040456"; transcript\_id "TCONS\_00067163"; exon\_number "11";  
oId "CUFF.72844.11"; tss\_id "TSS50941";  
chr4 Cufflinks exon100010008 100010435 . + . gene\_id "XLOC\_040456"; transcript\_id "TCONS\_00067162"; exon\_number "1";  
oId "CUFF.72844.10"; tss\_id "TSS50941";



|                                         |           |   |   |   |                                                                          |
|-----------------------------------------|-----------|---|---|---|--------------------------------------------------------------------------|
| chr4 Cufflinks exon100054706            | 100054956 | . | + | . | gene_id "XLOC_040456"; transcript_id "TCONS_00067162"; exon_number "2";  |
| oId "CUFF.72844.10"; tss_id "TSS50941"; |           |   |   |   |                                                                          |
| chr4 Cufflinks exon100078648            | 100078736 | . | + | . | gene_id "XLOC_040456"; transcript_id "TCONS_00067162"; exon_number "3";  |
| oId "CUFF.72844.10"; tss_id "TSS50941"; |           |   |   |   |                                                                          |
| chr4 Cufflinks exon100080578            | 100080779 | . | + | . | gene_id "XLOC_040456"; transcript_id "TCONS_00067162"; exon_number "4";  |
| oId "CUFF.72844.10"; tss_id "TSS50941"; |           |   |   |   |                                                                          |
| chr4 Cufflinks exon100207952            | 100208190 | . | + | . | gene_id "XLOC_040456"; transcript_id "TCONS_00067162"; exon_number "5";  |
| oId "CUFF.72844.10"; tss_id "TSS50941"; |           |   |   |   |                                                                          |
| chr4 Cufflinks exon100209823            | 100209942 | . | + | . | gene_id "XLOC_040456"; transcript_id "TCONS_00067162"; exon_number "6";  |
| oId "CUFF.72844.10"; tss_id "TSS50941"; |           |   |   |   |                                                                          |
| chr4 Cufflinks exon100212094            | 100212105 | . | + | . | gene_id "XLOC_040456"; transcript_id "TCONS_00067162"; exon_number "7";  |
| oId "CUFF.72844.10"; tss_id "TSS50941"; |           |   |   |   |                                                                          |
| chr4 Cufflinks exon100221456            | 100221527 | . | + | . | gene_id "XLOC_040456"; transcript_id "TCONS_00067162"; exon_number "8";  |
| oId "CUFF.72844.10"; tss_id "TSS50941"; |           |   |   |   |                                                                          |
| chr4 Cufflinks exon100221626            | 100221812 | . | + | . | gene_id "XLOC_040456"; transcript_id "TCONS_00067162"; exon_number "9";  |
| oId "CUFF.72844.10"; tss_id "TSS50941"; |           |   |   |   |                                                                          |
| chr4 Cufflinks exon100222108            | 100222513 | . | + | . | gene_id "XLOC_040456"; transcript_id "TCONS_00067162"; exon_number "10"; |
| oId "CUFF.72844.10"; tss_id "TSS50941"; |           |   |   |   |                                                                          |
| chr4 Cufflinks exon100024550            | 100024582 | . | + | . | gene_id "XLOC_040456"; transcript_id "TCONS_00067166"; exon_number "1";  |
| oId "CUFF.72844.13"; tss_id "TSS50942"; |           |   |   |   |                                                                          |
| chr4 Cufflinks exon100054706            | 100054956 | . | + | . | gene_id "XLOC_040456"; transcript_id "TCONS_00067166"; exon_number "2";  |
| oId "CUFF.72844.13"; tss_id "TSS50942"; |           |   |   |   |                                                                          |
| chr4 Cufflinks exon100075711            | 100078736 | . | + | . | gene_id "XLOC_040456"; transcript_id "TCONS_00067166"; exon_number "3";  |
| oId "CUFF.72844.13"; tss_id "TSS50942"; |           |   |   |   |                                                                          |
| chr4 Cufflinks exon100125514            | 100125588 | . | + | . | gene_id "XLOC_040456"; transcript_id "TCONS_00067166"; exon_number "4";  |
| oId "CUFF.72844.13"; tss_id "TSS50942"; |           |   |   |   |                                                                          |
| chr4 Cufflinks exon100207952            | 100208190 | . | + | . | gene_id "XLOC_040456"; transcript_id "TCONS_00067166"; exon_number "5";  |
| oId "CUFF.72844.13"; tss_id "TSS50942"; |           |   |   |   |                                                                          |
| chr4 Cufflinks exon100209823            | 100209942 | . | + | . | gene_id "XLOC_040456"; transcript_id "TCONS_00067166"; exon_number "6";  |
| oId "CUFF.72844.13"; tss_id "TSS50942"; |           |   |   |   |                                                                          |
| chr4 Cufflinks exon100212094            | 100212105 | . | + | . | gene_id "XLOC_040456"; transcript_id "TCONS_00067166"; exon_number "7";  |
| oId "CUFF.72844.13"; tss_id "TSS50942"; |           |   |   |   |                                                                          |
| chr4 Cufflinks exon100221456            | 100221527 | . | + | . | gene_id "XLOC_040456"; transcript_id "TCONS_00067166"; exon_number "8";  |
| oId "CUFF.72844.13"; tss_id "TSS50942"; |           |   |   |   |                                                                          |
| chr4 Cufflinks exon100221626            | 100221812 | . | + | . | gene_id "XLOC_040456"; transcript_id "TCONS_00067166"; exon_number "9";  |
| oId "CUFF.72844.13"; tss_id "TSS50942"; |           |   |   |   |                                                                          |
| chr4 Cufflinks exon100222108            | 100222513 | . | + | . | gene_id "XLOC_040456"; transcript_id "TCONS_00067166"; exon_number "10"; |
| oId "CUFF.72844.13"; tss_id "TSS50942"; |           |   |   |   |                                                                          |
| chr4 Cufflinks exon105411906            | 105412217 | . | + | . | gene_id "XLOC_040473"; transcript_id "TCONS_00067192"; exon_number "1";  |
| oId "CUFF.72975.1"; tss_id "TSS50962";  |           |   |   |   |                                                                          |
| chr4 Cufflinks exon105559055            | 105559113 | . | + | . | gene_id "XLOC_040473"; transcript_id "TCONS_00067192"; exon_number "2";  |
| oId "CUFF.72975.1"; tss_id "TSS50962";  |           |   |   |   |                                                                          |
| chr4 Cufflinks exon105559607            | 105559867 | . | + | . | gene_id "XLOC_040473"; transcript_id "TCONS_00067192"; exon_number "3";  |

oId "CUFF.72975.1"; tss\_id "TSS50962";  
chr4 Cufflinks exon109271666 109271889 . + . gene\_id "XLOC\_040522"; transcript\_id "TCONS\_00067253"; exon\_number "1";  
oId "CUFF.73147.1"; tss\_id "TSS51017";  
chr4 Cufflinks exon109292883 109293868 . + . gene\_id "XLOC\_040522"; transcript\_id "TCONS\_00067253"; exon\_number "2";  
oId "CUFF.73147.1"; tss\_id "TSS51017";  
chr4 Cufflinks exon109274660 109274706 . + . gene\_id "XLOC\_040522"; transcript\_id "TCONS\_00067254"; exon\_number "1";  
oId "CUFF.73147.2"; tss\_id "TSS51018";  
chr4 Cufflinks exon109292883 109293868 . + . gene\_id "XLOC\_040522"; transcript\_id "TCONS\_00067254"; exon\_number "2";  
oId "CUFF.73147.2"; tss\_id "TSS51018";  
chr4 Cufflinks exon109279932 109279984 . + . gene\_id "XLOC\_040522"; transcript\_id "TCONS\_00067256"; exon\_number "1";  
oId "CUFF.73147.3"; tss\_id "TSS51019";  
chr4 Cufflinks exon109286806 109286955 . + . gene\_id "XLOC\_040522"; transcript\_id "TCONS\_00067256"; exon\_number "2";  
oId "CUFF.73147.3"; tss\_id "TSS51019";  
chr4 Cufflinks exon109287316 109287581 . + . gene\_id "XLOC\_040522"; transcript\_id "TCONS\_00067256"; exon\_number "3";  
oId "CUFF.73147.3"; tss\_id "TSS51019";  
chr4 Cufflinks exon109292883 109293868 . + . gene\_id "XLOC\_040522"; transcript\_id "TCONS\_00067256"; exon\_number "4";  
oId "CUFF.73147.3"; tss\_id "TSS51019";  
chr4 Cufflinks exon109280695 109282418 . + . gene\_id "XLOC\_040522"; transcript\_id "TCONS\_00067257"; exon\_number "1";  
oId "CUFF.73147.4"; tss\_id "TSS51020";  
chr4 Cufflinks exon109287316 109287581 . + . gene\_id "XLOC\_040522"; transcript\_id "TCONS\_00067257"; exon\_number "2";  
oId "CUFF.73147.4"; tss\_id "TSS51020";  
chr4 Cufflinks exon109292883 109293868 . + . gene\_id "XLOC\_040522"; transcript\_id "TCONS\_00067257"; exon\_number "3";  
oId "CUFF.73147.4"; tss\_id "TSS51020";  
chr4 Cufflinks exon109281771 109282418 . + . gene\_id "XLOC\_040522"; transcript\_id "TCONS\_00067259"; exon\_number "1";  
oId "CUFF.73147.5"; tss\_id "TSS51021";  
chr4 Cufflinks exon109286806 109286955 . + . gene\_id "XLOC\_040522"; transcript\_id "TCONS\_00067259"; exon\_number "2";  
oId "CUFF.73147.5"; tss\_id "TSS51021";  
chr4 Cufflinks exon109287316 109287581 . + . gene\_id "XLOC\_040522"; transcript\_id "TCONS\_00067259"; exon\_number "3";  
oId "CUFF.73147.5"; tss\_id "TSS51021";  
chr4 Cufflinks exon109292883 109293868 . + . gene\_id "XLOC\_040522"; transcript\_id "TCONS\_00067259"; exon\_number "4";  
oId "CUFF.73147.5"; tss\_id "TSS51021";  
chr4 Cufflinks exon109286666 109286712 . + . gene\_id "XLOC\_040522"; transcript\_id "TCONS\_00067260"; exon\_number "1";  
oId "CUFF.73147.7"; tss\_id "TSS51022";  
chr4 Cufflinks exon109286804 109287041 . + . gene\_id "XLOC\_040522"; transcript\_id "TCONS\_00067260"; exon\_number "2";  
oId "CUFF.73147.7"; tss\_id "TSS51022";  
chr4 Cufflinks exon109287316 109287581 . + . gene\_id "XLOC\_040522"; transcript\_id "TCONS\_00067260"; exon\_number "3";  
oId "CUFF.73147.7"; tss\_id "TSS51022";  
chr4 Cufflinks exon109292883 109293868 . + . gene\_id "XLOC\_040522"; transcript\_id "TCONS\_00067260"; exon\_number "4";  
oId "CUFF.73147.7"; tss\_id "TSS51022";  
chr4 Cufflinks exon109286982 109287001 . + . gene\_id "XLOC\_040522"; transcript\_id "TCONS\_00067261"; exon\_number "1";  
oId "CUFF.73147.8"; tss\_id "TSS51023";  
chr4 Cufflinks exon109287316 109287581 . + . gene\_id "XLOC\_040522"; transcript\_id "TCONS\_00067261"; exon\_number "2";  
oId "CUFF.73147.8"; tss\_id "TSS51023";

|                                        |           |   |   |   |                                                                         |
|----------------------------------------|-----------|---|---|---|-------------------------------------------------------------------------|
| chr4 Cufflinks exon109292883           | 109293868 | . | + | . | gene_id "XLOC_040522"; transcript_id "TCONS_00067261"; exon_number "3"; |
| oId "CUFF.73147.8"; tss_id "TSS51023"; |           |   |   |   |                                                                         |
| chr4 Cufflinks exon109555996           | 109556838 | . | + | . | gene_id "XLOC_040529"; transcript_id "TCONS_00067269"; exon_number "1"; |
| oId "CUFF.73197.2"; tss_id "TSS51032"; |           |   |   |   |                                                                         |
| chr4 Cufflinks exon109557332           | 109558594 | . | + | . | gene_id "XLOC_040529"; transcript_id "TCONS_00067269"; exon_number "2"; |
| oId "CUFF.73197.2"; tss_id "TSS51032"; |           |   |   |   |                                                                         |
| chr4 Cufflinks exon109589172           | 109591248 | . | + | . | gene_id "XLOC_040534"; transcript_id "TCONS_00067274"; exon_number "1"; |
| oId "CUFF.73206.1"; tss_id "TSS51037"; |           |   |   |   |                                                                         |
| chr4 Cufflinks exon109592843           | 109593454 | . | + | . | gene_id "XLOC_040534"; transcript_id "TCONS_00067274"; exon_number "2"; |
| oId "CUFF.73206.1"; tss_id "TSS51037"; |           |   |   |   |                                                                         |
| chr4 Cufflinks exon109597809           | 109599196 | . | + | . | gene_id "XLOC_040536"; transcript_id "TCONS_00067276"; exon_number "1"; |
| oId "CUFF.73206.4"; tss_id "TSS51039"; |           |   |   |   |                                                                         |
| chr4 Cufflinks exon109607651           | 109607710 | . | + | . | gene_id "XLOC_040536"; transcript_id "TCONS_00067276"; exon_number "2"; |
| oId "CUFF.73206.4"; tss_id "TSS51039"; |           |   |   |   |                                                                         |
| chr4 Cufflinks exon111265639           | 111265814 | . | + | . | gene_id "XLOC_040549"; transcript_id "TCONS_00067303"; exon_number "1"; |
| oId "CUFF.73243.1"; tss_id "TSS51055"; |           |   |   |   |                                                                         |
| chr4 Cufflinks exon111271372           | 111271479 | . | + | . | gene_id "XLOC_040549"; transcript_id "TCONS_00067303"; exon_number "2"; |
| oId "CUFF.73243.1"; tss_id "TSS51055"; |           |   |   |   |                                                                         |
| chr4 Cufflinks exon111271790           | 111272061 | . | + | . | gene_id "XLOC_040549"; transcript_id "TCONS_00067303"; exon_number "3"; |
| oId "CUFF.73243.1"; tss_id "TSS51055"; |           |   |   |   |                                                                         |
| chr4 Cufflinks exon119199788           | 119200586 | . | + | . | gene_id "XLOC_040572"; transcript_id "TCONS_00067356"; exon_number "1"; |
| oId "CUFF.73457.1"; tss_id "TSS51091"; |           |   |   |   |                                                                         |
| chr4 Cufflinks exon119200779           | 119200978 | . | + | . | gene_id "XLOC_040572"; transcript_id "TCONS_00067356"; exon_number "2"; |
| oId "CUFF.73457.1"; tss_id "TSS51091"; |           |   |   |   |                                                                         |
| chr4 Cufflinks exon119199917           | 119199947 | . | + | . | gene_id "XLOC_040572"; transcript_id "TCONS_00067358"; exon_number "1"; |
| oId "CUFF.73457.3"; tss_id "TSS51092"; |           |   |   |   |                                                                         |
| chr4 Cufflinks exon119200544           | 119200586 | . | + | . | gene_id "XLOC_040572"; transcript_id "TCONS_00067358"; exon_number "2"; |
| oId "CUFF.73457.3"; tss_id "TSS51092"; |           |   |   |   |                                                                         |
| chr4 Cufflinks exon119200779           | 119200978 | . | + | . | gene_id "XLOC_040572"; transcript_id "TCONS_00067358"; exon_number "3"; |
| oId "CUFF.73457.3"; tss_id "TSS51092"; |           |   |   |   |                                                                         |
| chr4 Cufflinks exon119199917           | 119199947 | . | + | . | gene_id "XLOC_040572"; transcript_id "TCONS_00067357"; exon_number "1"; |
| oId "CUFF.73457.2"; tss_id "TSS51092"; |           |   |   |   |                                                                         |
| chr4 Cufflinks exon119200099           | 119200292 | . | + | . | gene_id "XLOC_040572"; transcript_id "TCONS_00067357"; exon_number "2"; |
| oId "CUFF.73457.2"; tss_id "TSS51092"; |           |   |   |   |                                                                         |
| chr4 Cufflinks exon119200544           | 119200586 | . | + | . | gene_id "XLOC_040572"; transcript_id "TCONS_00067357"; exon_number "3"; |
| oId "CUFF.73457.2"; tss_id "TSS51092"; |           |   |   |   |                                                                         |
| chr4 Cufflinks exon119200779           | 119200978 | . | + | . | gene_id "XLOC_040572"; transcript_id "TCONS_00067357"; exon_number "4"; |
| oId "CUFF.73457.2"; tss_id "TSS51092"; |           |   |   |   |                                                                         |
| chr4 Cufflinks exon120847863           | 120848079 | . | + | . | gene_id "XLOC_040622"; transcript_id "TCONS_00067430"; exon_number "1"; |
| oId "CUFF.73570.1"; tss_id "TSS51149"; |           |   |   |   |                                                                         |
| chr4 Cufflinks exon120884943           | 120885448 | . | + | . | gene_id "XLOC_040622"; transcript_id "TCONS_00067430"; exon_number "2"; |
| oId "CUFF.73570.1"; tss_id "TSS51149"; |           |   |   |   |                                                                         |
| chr4 Cufflinks exon129209258           | 129214277 | . | + | . | gene_id "XLOC_040668"; transcript_id "TCONS_00067520"; exon_number "1"; |

|                                        |   |   |   |                                                                          |  |
|----------------------------------------|---|---|---|--------------------------------------------------------------------------|--|
| oId "CUFF.73743.1"; tss_id "TSS51210"; |   |   |   |                                                                          |  |
| chr4 Cufflinks exon129224117 129224190 | . | + | . | gene_id "XLOC_040668"; transcript_id "TCONS_00067520"; exon_number "2";  |  |
| oId "CUFF.73743.1"; tss_id "TSS51210"; |   |   |   |                                                                          |  |
| chr4 Cufflinks exon129387763 129387927 | . | + | . | gene_id "XLOC_040668"; transcript_id "TCONS_00067520"; exon_number "3";  |  |
| oId "CUFF.73743.1"; tss_id "TSS51210"; |   |   |   |                                                                          |  |
| chr4 Cufflinks exon129391205 129391371 | . | + | . | gene_id "XLOC_040668"; transcript_id "TCONS_00067520"; exon_number "4";  |  |
| oId "CUFF.73743.1"; tss_id "TSS51210"; |   |   |   |                                                                          |  |
| chr4 Cufflinks exon129391507 129391704 | . | + | . | gene_id "XLOC_040668"; transcript_id "TCONS_00067520"; exon_number "5";  |  |
| oId "CUFF.73743.1"; tss_id "TSS51210"; |   |   |   |                                                                          |  |
| chr4 Cufflinks exon129402828 129402905 | . | + | . | gene_id "XLOC_040668"; transcript_id "TCONS_00067520"; exon_number "6";  |  |
| oId "CUFF.73743.1"; tss_id "TSS51210"; |   |   |   |                                                                          |  |
| chr4 Cufflinks exon129404484 129404642 | . | + | . | gene_id "XLOC_040668"; transcript_id "TCONS_00067520"; exon_number "7";  |  |
| oId "CUFF.73743.1"; tss_id "TSS51210"; |   |   |   |                                                                          |  |
| chr4 Cufflinks exon129432566 129432800 | . | + | . | gene_id "XLOC_040668"; transcript_id "TCONS_00067520"; exon_number "8";  |  |
| oId "CUFF.73743.1"; tss_id "TSS51210"; |   |   |   |                                                                          |  |
| chr4 Cufflinks exon129434059 129434139 | . | + | . | gene_id "XLOC_040668"; transcript_id "TCONS_00067520"; exon_number "9";  |  |
| oId "CUFF.73743.1"; tss_id "TSS51210"; |   |   |   |                                                                          |  |
| chr4 Cufflinks exon129437012 129437153 | . | + | . | gene_id "XLOC_040668"; transcript_id "TCONS_00067520"; exon_number "10"; |  |
| oId "CUFF.73743.1"; tss_id "TSS51210"; |   |   |   |                                                                          |  |
| chr4 Cufflinks exon129439911 129440551 | . | + | . | gene_id "XLOC_040668"; transcript_id "TCONS_00067520"; exon_number "11"; |  |
| oId "CUFF.73743.1"; tss_id "TSS51210"; |   |   |   |                                                                          |  |
| chr4 Cufflinks exon129433174 129434139 | . | + | . | gene_id "XLOC_040668"; transcript_id "TCONS_00067534"; exon_number "1";  |  |
| oId "CUFF.73743.4"; tss_id "TSS51211"; |   |   |   |                                                                          |  |
| chr4 Cufflinks exon129434716 129435632 | . | + | . | gene_id "XLOC_040668"; transcript_id "TCONS_00067534"; exon_number "2";  |  |
| oId "CUFF.73743.4"; tss_id "TSS51211"; |   |   |   |                                                                          |  |
| chr4 Cufflinks exon152833972 152834139 | . | + | . | gene_id "XLOC_040799"; transcript_id "TCONS_00067722"; exon_number "1";  |  |
| oId "CUFF.74217.2"; tss_id "TSS51366"; |   |   |   |                                                                          |  |
| chr4 Cufflinks exon152842916 152843026 | . | + | . | gene_id "XLOC_040799"; transcript_id "TCONS_00067722"; exon_number "2";  |  |
| oId "CUFF.74217.2"; tss_id "TSS51366"; |   |   |   |                                                                          |  |
| chr4 Cufflinks exon152860055 152860142 | . | + | . | gene_id "XLOC_040799"; transcript_id "TCONS_00067722"; exon_number "3";  |  |
| oId "CUFF.74217.2"; tss_id "TSS51366"; |   |   |   |                                                                          |  |
| chr4 Cufflinks exon152860931 152864598 | . | + | . | gene_id "XLOC_040799"; transcript_id "TCONS_00067722"; exon_number "4";  |  |
| oId "CUFF.74217.2"; tss_id "TSS51366"; |   |   |   |                                                                          |  |
| chr4 Cufflinks exon152833972 152834139 | . | + | . | gene_id "XLOC_040799"; transcript_id "TCONS_00067721"; exon_number "1";  |  |
| oId "CUFF.74217.1"; tss_id "TSS51366"; |   |   |   |                                                                          |  |
| chr4 Cufflinks exon152840623 152840684 | . | + | . | gene_id "XLOC_040799"; transcript_id "TCONS_00067721"; exon_number "2";  |  |
| oId "CUFF.74217.1"; tss_id "TSS51366"; |   |   |   |                                                                          |  |
| chr4 Cufflinks exon152842916 152843026 | . | + | . | gene_id "XLOC_040799"; transcript_id "TCONS_00067721"; exon_number "3";  |  |
| oId "CUFF.74217.1"; tss_id "TSS51366"; |   |   |   |                                                                          |  |
| chr4 Cufflinks exon152860931 152864598 | . | + | . | gene_id "XLOC_040799"; transcript_id "TCONS_00067721"; exon_number "4";  |  |
| oId "CUFF.74217.1"; tss_id "TSS51366"; |   |   |   |                                                                          |  |
| chr4 Cufflinks exon153000952 153000980 | . | + | . | gene_id "XLOC_040800"; transcript_id "TCONS_00067723"; exon_number "1";  |  |
| oId "CUFF.74240.1"; tss_id "TSS51367"; |   |   |   |                                                                          |  |

|                                        |           |   |   |   |                                                                         |
|----------------------------------------|-----------|---|---|---|-------------------------------------------------------------------------|
| chr4 Cufflinks exon153022636           | 153022732 | . | + | . | gene_id "XLOC_040800"; transcript_id "TCONS_00067723"; exon_number "2"; |
| oId "CUFF.74240.1"; tss_id "TSS51367"; |           |   |   |   |                                                                         |
| chr4 Cufflinks exon153024779           | 153026062 | . | + | . | gene_id "XLOC_040800"; transcript_id "TCONS_00067723"; exon_number "3"; |
| oId "CUFF.74240.1"; tss_id "TSS51367"; |           |   |   |   |                                                                         |
| chr4 Cufflinks exon153021905           | 153021969 | . | + | . | gene_id "XLOC_040800"; transcript_id "TCONS_00067725"; exon_number "1"; |
| oId "CUFF.74240.3"; tss_id "TSS51368"; |           |   |   |   |                                                                         |
| chr4 Cufflinks exon153022636           | 153022732 | . | + | . | gene_id "XLOC_040800"; transcript_id "TCONS_00067725"; exon_number "2"; |
| oId "CUFF.74240.3"; tss_id "TSS51368"; |           |   |   |   |                                                                         |
| chr4 Cufflinks exon153024779           | 153026062 | . | + | . | gene_id "XLOC_040800"; transcript_id "TCONS_00067725"; exon_number "3"; |
| oId "CUFF.74240.3"; tss_id "TSS51368"; |           |   |   |   |                                                                         |
| chr4 Cufflinks exon154868450           | 154868899 | . | + | . | gene_id "XLOC_040820"; transcript_id "TCONS_00067764"; exon_number "1"; |
| oId "CUFF.74329.1"; tss_id "TSS51397"; |           |   |   |   |                                                                         |
| chr4 Cufflinks exon154869973           | 154870013 | . | + | . | gene_id "XLOC_040820"; transcript_id "TCONS_00067764"; exon_number "2"; |
| oId "CUFF.74329.1"; tss_id "TSS51397"; |           |   |   |   |                                                                         |
| chr4 Cufflinks exon155122900           | 155122983 | . | + | . | gene_id "XLOC_040820"; transcript_id "TCONS_00067764"; exon_number "3"; |
| oId "CUFF.74329.1"; tss_id "TSS51397"; |           |   |   |   |                                                                         |
| chr4 Cufflinks exon155128120           | 155128205 | . | + | . | gene_id "XLOC_040820"; transcript_id "TCONS_00067764"; exon_number "4"; |
| oId "CUFF.74329.1"; tss_id "TSS51397"; |           |   |   |   |                                                                         |
| chr4 Cufflinks exon155190214           | 155190460 | . | + | . | gene_id "XLOC_040820"; transcript_id "TCONS_00067764"; exon_number "5"; |
| oId "CUFF.74329.1"; tss_id "TSS51397"; |           |   |   |   |                                                                         |
| chr4 Cufflinks exon154868450           | 154868899 | . | + | . | gene_id "XLOC_040820"; transcript_id "TCONS_00067765"; exon_number "1"; |
| oId "CUFF.74329.2"; tss_id "TSS51397"; |           |   |   |   |                                                                         |
| chr4 Cufflinks exon154869973           | 154870013 | . | + | . | gene_id "XLOC_040820"; transcript_id "TCONS_00067765"; exon_number "2"; |
| oId "CUFF.74329.2"; tss_id "TSS51397"; |           |   |   |   |                                                                         |
| chr4 Cufflinks exon155063268           | 155063394 | . | + | . | gene_id "XLOC_040820"; transcript_id "TCONS_00067765"; exon_number "3"; |
| oId "CUFF.74329.2"; tss_id "TSS51397"; |           |   |   |   |                                                                         |
| chr4 Cufflinks exon155122900           | 155122983 | . | + | . | gene_id "XLOC_040820"; transcript_id "TCONS_00067765"; exon_number "4"; |
| oId "CUFF.74329.2"; tss_id "TSS51397"; |           |   |   |   |                                                                         |
| chr4 Cufflinks exon155128120           | 155128205 | . | + | . | gene_id "XLOC_040820"; transcript_id "TCONS_00067765"; exon_number "5"; |
| oId "CUFF.74329.2"; tss_id "TSS51397"; |           |   |   |   |                                                                         |
| chr4 Cufflinks exon155193320           | 155193437 | . | + | . | gene_id "XLOC_040820"; transcript_id "TCONS_00067765"; exon_number "6"; |
| oId "CUFF.74329.2"; tss_id "TSS51397"; |           |   |   |   |                                                                         |
| chr4 Cufflinks exon154869777           | 154869856 | . | + | . | gene_id "XLOC_040820"; transcript_id "TCONS_00067766"; exon_number "1"; |
| oId "CUFF.74329.3"; tss_id "TSS51398"; |           |   |   |   |                                                                         |
| chr4 Cufflinks exon154869973           | 154870013 | . | + | . | gene_id "XLOC_040820"; transcript_id "TCONS_00067766"; exon_number "2"; |
| oId "CUFF.74329.3"; tss_id "TSS51398"; |           |   |   |   |                                                                         |
| chr4 Cufflinks exon155063268           | 155063394 | . | + | . | gene_id "XLOC_040820"; transcript_id "TCONS_00067766"; exon_number "3"; |
| oId "CUFF.74329.3"; tss_id "TSS51398"; |           |   |   |   |                                                                         |
| chr4 Cufflinks exon155122900           | 155122983 | . | + | . | gene_id "XLOC_040820"; transcript_id "TCONS_00067766"; exon_number "4"; |
| oId "CUFF.74329.3"; tss_id "TSS51398"; |           |   |   |   |                                                                         |
| chr4 Cufflinks exon155128120           | 155128205 | . | + | . | gene_id "XLOC_040820"; transcript_id "TCONS_00067766"; exon_number "5"; |
| oId "CUFF.74329.3"; tss_id "TSS51398"; |           |   |   |   |                                                                         |
| chr4 Cufflinks exon155219405           | 155220143 | . | + | . | gene_id "XLOC_040820"; transcript_id "TCONS_00067766"; exon_number "6"; |

oId "CUFF.74329.3"; tss\_id "TSS51398";  
chr4 Cufflinks exon154869997 154870013 . + . gene\_id "XLOC\_040820"; transcript\_id "TCONS\_00067767"; exon\_number "1";  
oId "CUFF.74329.4"; tss\_id "TSS51399";  
chr4 Cufflinks exon155063268 155063394 . + . gene\_id "XLOC\_040820"; transcript\_id "TCONS\_00067767"; exon\_number "2";  
oId "CUFF.74329.4"; tss\_id "TSS51399";  
chr4 Cufflinks exon155122900 155122983 . + . gene\_id "XLOC\_040820"; transcript\_id "TCONS\_00067767"; exon\_number "3";  
oId "CUFF.74329.4"; tss\_id "TSS51399";  
chr4 Cufflinks exon155128120 155128205 . + . gene\_id "XLOC\_040820"; transcript\_id "TCONS\_00067767"; exon\_number "4";  
oId "CUFF.74329.4"; tss\_id "TSS51399";  
chr4 Cufflinks exon155190214 155190460 . + . gene\_id "XLOC\_040820"; transcript\_id "TCONS\_00067767"; exon\_number "5";  
oId "CUFF.74329.4"; tss\_id "TSS51399";  
chr4 Cufflinks exon154910387 154910403 . + . gene\_id "XLOC\_040820"; transcript\_id "TCONS\_00067768"; exon\_number "1";  
oId "CUFF.74329.5"; tss\_id "TSS51400";  
chr4 Cufflinks exon155063268 155063394 . + . gene\_id "XLOC\_040820"; transcript\_id "TCONS\_00067768"; exon\_number "2";  
oId "CUFF.74329.5"; tss\_id "TSS51400";  
chr4 Cufflinks exon155122900 155122983 . + . gene\_id "XLOC\_040820"; transcript\_id "TCONS\_00067768"; exon\_number "3";  
oId "CUFF.74329.5"; tss\_id "TSS51400";  
chr4 Cufflinks exon155128120 155128205 . + . gene\_id "XLOC\_040820"; transcript\_id "TCONS\_00067768"; exon\_number "4";  
oId "CUFF.74329.5"; tss\_id "TSS51400";  
chr4 Cufflinks exon155193320 155193437 . + . gene\_id "XLOC\_040820"; transcript\_id "TCONS\_00067768"; exon\_number "5";  
oId "CUFF.74329.5"; tss\_id "TSS51400";  
chr4 Cufflinks exon174305593 174305892 . + . gene\_id "XLOC\_040869"; transcript\_id "TCONS\_00067861"; exon\_number "1";  
oId "CUFF.74595.1"; tss\_id "TSS51466";  
chr4 Cufflinks exon174309664 174309732 . + . gene\_id "XLOC\_040869"; transcript\_id "TCONS\_00067861"; exon\_number "2";  
oId "CUFF.74595.1"; tss\_id "TSS51466";  
chr4 Cufflinks exon174312340 174312424 . + . gene\_id "XLOC\_040869"; transcript\_id "TCONS\_00067861"; exon\_number "3";  
oId "CUFF.74595.1"; tss\_id "TSS51466";  
chr4 Cufflinks exon174313877 174314343 . + . gene\_id "XLOC\_040869"; transcript\_id "TCONS\_00067861"; exon\_number "4";  
oId "CUFF.74595.1"; tss\_id "TSS51466";  
chr4 Cufflinks exon174312752 174314321 . + . gene\_id "XLOC\_040869"; transcript\_id "TCONS\_00067863"; exon\_number "1";  
oId "CUFF.74595.2"; tss\_id "TSS51467";  
chr4 Cufflinks exon174323869 174323961 . + . gene\_id "XLOC\_040869"; transcript\_id "TCONS\_00067863"; exon\_number "2";  
oId "CUFF.74595.2"; tss\_id "TSS51467";  
chr4 Cufflinks exon174325047 174325101 . + . gene\_id "XLOC\_040869"; transcript\_id "TCONS\_00067863"; exon\_number "3";  
oId "CUFF.74595.2"; tss\_id "TSS51467";  
chr4 Cufflinks exon174365775 174366189 . + . gene\_id "XLOC\_040869"; transcript\_id "TCONS\_00067863"; exon\_number "4";  
oId "CUFF.74595.2"; tss\_id "TSS51467";  
chr4 Cufflinks exon174325068 174325101 . + . gene\_id "XLOC\_040869"; transcript\_id "TCONS\_00067867"; exon\_number "1";  
oId "CUFF.74595.3"; tss\_id "TSS51468";  
chr4 Cufflinks exon174384304 174386705 . + . gene\_id "XLOC\_040869"; transcript\_id "TCONS\_00067867"; exon\_number "2";  
oId "CUFF.74595.3"; tss\_id "TSS51468";  
chr4 Cufflinks exon178364292 178366597 . + . gene\_id "XLOC\_040914"; transcript\_id "TCONS\_00067914"; exon\_number "1";  
oId "CUFF.74826.1"; tss\_id "TSS51516";

|                                        |           |   |   |   |                                                                         |
|----------------------------------------|-----------|---|---|---|-------------------------------------------------------------------------|
| chr4 Cufflinks exon178372629           | 178372744 | . | + | . | gene_id "XLOC_040914"; transcript_id "TCONS_00067914"; exon_number "2"; |
| oId "CUFF.74826.1"; tss_id "TSS51516"; |           |   |   |   |                                                                         |
| chr4 Cufflinks exon178514626           | 178514700 | . | + | . | gene_id "XLOC_040914"; transcript_id "TCONS_00067914"; exon_number "3"; |
| oId "CUFF.74826.1"; tss_id "TSS51516"; |           |   |   |   |                                                                         |
| chr4 Cufflinks exon178517615           | 178517685 | . | + | . | gene_id "XLOC_040914"; transcript_id "TCONS_00067914"; exon_number "4"; |
| oId "CUFF.74826.1"; tss_id "TSS51516"; |           |   |   |   |                                                                         |
| chr4 Cufflinks exon178519686           | 178521161 | . | + | . | gene_id "XLOC_040914"; transcript_id "TCONS_00067914"; exon_number "5"; |
| oId "CUFF.74826.1"; tss_id "TSS51516"; |           |   |   |   |                                                                         |
| chr4 Cufflinks exon180980067           | 180980435 | . | + | . | gene_id "XLOC_040931"; transcript_id "TCONS_00067932"; exon_number "1"; |
| oId "CUFF.74860.2"; tss_id "TSS51533"; |           |   |   |   |                                                                         |
| chr4 Cufflinks exon181069968           | 181070087 | . | + | . | gene_id "XLOC_040931"; transcript_id "TCONS_00067932"; exon_number "2"; |
| oId "CUFF.74860.2"; tss_id "TSS51533"; |           |   |   |   |                                                                         |
| chr4 Cufflinks exon181070865           | 181070934 | . | + | . | gene_id "XLOC_040931"; transcript_id "TCONS_00067932"; exon_number "3"; |
| oId "CUFF.74860.2"; tss_id "TSS51533"; |           |   |   |   |                                                                         |
| chr4 Cufflinks exon181157062           | 181157121 | . | + | . | gene_id "XLOC_040931"; transcript_id "TCONS_00067932"; exon_number "4"; |
| oId "CUFF.74860.2"; tss_id "TSS51533"; |           |   |   |   |                                                                         |
| chr4 Cufflinks exon181166704           | 181166809 | . | + | . | gene_id "XLOC_040931"; transcript_id "TCONS_00067932"; exon_number "5"; |
| oId "CUFF.74860.2"; tss_id "TSS51533"; |           |   |   |   |                                                                         |
| chr4 Cufflinks exon181168288           | 181168322 | . | + | . | gene_id "XLOC_040931"; transcript_id "TCONS_00067932"; exon_number "6"; |
| oId "CUFF.74860.2"; tss_id "TSS51533"; |           |   |   |   |                                                                         |
| chr4 Cufflinks exon180980067           | 180980435 | . | + | . | gene_id "XLOC_040931"; transcript_id "TCONS_00067931"; exon_number "1"; |
| oId "CUFF.74860.1"; tss_id "TSS51533"; |           |   |   |   |                                                                         |
| chr4 Cufflinks exon181069968           | 181070087 | . | + | . | gene_id "XLOC_040931"; transcript_id "TCONS_00067931"; exon_number "2"; |
| oId "CUFF.74860.1"; tss_id "TSS51533"; |           |   |   |   |                                                                         |
| chr4 Cufflinks exon181157062           | 181157121 | . | + | . | gene_id "XLOC_040931"; transcript_id "TCONS_00067931"; exon_number "3"; |
| oId "CUFF.74860.1"; tss_id "TSS51533"; |           |   |   |   |                                                                         |
| chr4 Cufflinks exon181166704           | 181166809 | . | + | . | gene_id "XLOC_040931"; transcript_id "TCONS_00067931"; exon_number "4"; |
| oId "CUFF.74860.1"; tss_id "TSS51533"; |           |   |   |   |                                                                         |
| chr4 Cufflinks exon181168288           | 181168322 | . | + | . | gene_id "XLOC_040931"; transcript_id "TCONS_00067931"; exon_number "5"; |
| oId "CUFF.74860.1"; tss_id "TSS51533"; |           |   |   |   |                                                                         |
| chr4 Cufflinks exon185395906           | 185397008 | . | + | . | gene_id "XLOC_040950"; transcript_id "TCONS_00067965"; exon_number "1"; |
| oId "CUFF.74943.2"; tss_id "TSS51558"; |           |   |   |   |                                                                         |
| chr4 Cufflinks exon185398770           | 185403548 | . | + | . | gene_id "XLOC_040950"; transcript_id "TCONS_00067965"; exon_number "2"; |
| oId "CUFF.74943.2"; tss_id "TSS51558"; |           |   |   |   |                                                                         |
| chr4 Cufflinks exon185395968           | 185397008 | . | + | . | gene_id "XLOC_040950"; transcript_id "TCONS_00067966"; exon_number "1"; |
| oId "CUFF.74943.3"; tss_id "TSS51558"; |           |   |   |   |                                                                         |
| chr4 Cufflinks exon185397742           | 185403548 | . | + | . | gene_id "XLOC_040950"; transcript_id "TCONS_00067966"; exon_number "2"; |
| oId "CUFF.74943.3"; tss_id "TSS51558"; |           |   |   |   |                                                                         |
| chr4 Cufflinks exon185395971           | 185397008 | . | + | . | gene_id "XLOC_040950"; transcript_id "TCONS_00067967"; exon_number "1"; |
| oId "CUFF.74943.4"; tss_id "TSS51558"; |           |   |   |   |                                                                         |
| chr4 Cufflinks exon185410667           | 185412342 | . | + | . | gene_id "XLOC_040950"; transcript_id "TCONS_00067967"; exon_number "2"; |
| oId "CUFF.74943.4"; tss_id "TSS51558"; |           |   |   |   |                                                                         |
| chr4 Cufflinks exon185395974           | 185397009 | . | + | . | gene_id "XLOC_040950"; transcript_id "TCONS_00067968"; exon_number "1"; |

oId "CUFF.74943.5"; tss\_id "TSS51558";  
chr4 Cufflinks exon185397743 185403548 . + . gene\_id "XLOC\_040950"; transcript\_id "TCONS\_00067968"; exon\_number "2";  
oId "CUFF.74943.5"; tss\_id "TSS51558";  
chr4 Cufflinks exon185395978 185398371 . + . gene\_id "XLOC\_040950"; transcript\_id "TCONS\_00067969"; exon\_number "1";  
oId "CUFF.74943.6"; tss\_id "TSS51558";  
chr4 Cufflinks exon185398770 185403548 . + . gene\_id "XLOC\_040950"; transcript\_id "TCONS\_00067969"; exon\_number "2";  
oId "CUFF.74943.6"; tss\_id "TSS51558";  
chr4 Cufflinks exon185408077 185409424 . + . gene\_id "XLOC\_040950"; transcript\_id "TCONS\_00067970"; exon\_number "1";  
oId "CUFF.74943.7"; tss\_id "TSS51559";  
chr4 Cufflinks exon185410667 185412342 . + . gene\_id "XLOC\_040950"; transcript\_id "TCONS\_00067970"; exon\_number "2";  
oId "CUFF.74943.7"; tss\_id "TSS51559";  
chr4 Cufflinks exon189376719 189376828 . + . gene\_id "XLOC\_040970"; transcript\_id "TCONS\_00068020"; exon\_number "1";  
oId "CUFF.75060.1"; tss\_id "TSS51589";  
chr4 Cufflinks exon189377818 189377916 . + . gene\_id "XLOC\_040970"; transcript\_id "TCONS\_00068020"; exon\_number "2";  
oId "CUFF.75060.1"; tss\_id "TSS51589";  
chr4 Cufflinks exon189397852 189397910 . + . gene\_id "XLOC\_040970"; transcript\_id "TCONS\_00068020"; exon\_number "3";  
oId "CUFF.75060.1"; tss\_id "TSS51589";  
chr4 Cufflinks exon189398792 189399066 . + . gene\_id "XLOC\_040970"; transcript\_id "TCONS\_00068020"; exon\_number "4";  
oId "CUFF.75060.1"; tss\_id "TSS51589";  
chr4 Cufflinks exon189406933 189407484 . + . gene\_id "XLOC\_040970"; transcript\_id "TCONS\_00068020"; exon\_number "5";  
oId "CUFF.75060.1"; tss\_id "TSS51589";  
chr4 Cufflinks exon189376719 189376828 . + . gene\_id "XLOC\_040970"; transcript\_id "TCONS\_00068021"; exon\_number "1";  
oId "CUFF.75060.2"; tss\_id "TSS51589";  
chr4 Cufflinks exon189377818 189377916 . + . gene\_id "XLOC\_040970"; transcript\_id "TCONS\_00068021"; exon\_number "2";  
oId "CUFF.75060.2"; tss\_id "TSS51589";  
chr4 Cufflinks exon189397852 189397910 . + . gene\_id "XLOC\_040970"; transcript\_id "TCONS\_00068021"; exon\_number "3";  
oId "CUFF.75060.2"; tss\_id "TSS51589";  
chr4 Cufflinks exon189406933 189407019 . + . gene\_id "XLOC\_040970"; transcript\_id "TCONS\_00068021"; exon\_number "4";  
oId "CUFF.75060.2"; tss\_id "TSS51589";  
chr4 Cufflinks exon189462289 189462407 . + . gene\_id "XLOC\_040970"; transcript\_id "TCONS\_00068021"; exon\_number "5";  
oId "CUFF.75060.2"; tss\_id "TSS51589";  
chr4 Cufflinks exon189376719 189376828 . + . gene\_id "XLOC\_040970"; transcript\_id "TCONS\_00068022"; exon\_number "1";  
oId "CUFF.75060.3"; tss\_id "TSS51589";  
chr4 Cufflinks exon189377818 189377916 . + . gene\_id "XLOC\_040970"; transcript\_id "TCONS\_00068022"; exon\_number "2";  
oId "CUFF.75060.3"; tss\_id "TSS51589";  
chr4 Cufflinks exon189406933 189407019 . + . gene\_id "XLOC\_040970"; transcript\_id "TCONS\_00068022"; exon\_number "3";  
oId "CUFF.75060.3"; tss\_id "TSS51589";  
chr4 Cufflinks exon189522922 189523062 . + . gene\_id "XLOC\_040970"; transcript\_id "TCONS\_00068022"; exon\_number "4";  
oId "CUFF.75060.3"; tss\_id "TSS51589";  
chr4 Cufflinks exon190579696 190580135 . + . gene\_id "XLOC\_040984"; transcript\_id "TCONS\_00068037"; exon\_number "1";  
oId "CUFF.75086.2"; tss\_id "TSS51603";  
chr4 Cufflinks exon190581187 190581288 . + . gene\_id "XLOC\_040984"; transcript\_id "TCONS\_00068037"; exon\_number "2";  
oId "CUFF.75086.2"; tss\_id "TSS51603";



chr4 Cufflinks exon190582111 190588196 . + . gene\_id "XLOC\_040984"; transcript\_id "TCONS\_00068037"; exon\_number "3";  
oId "CUFF.75086.2"; tss\_id "TSS51603";  
chr4 Cufflinks exon190579696 190581288 . + . gene\_id "XLOC\_040984"; transcript\_id "TCONS\_00068036"; exon\_number "1";  
oId "CUFF.75086.1"; tss\_id "TSS51603";  
chr4 Cufflinks exon190582111 190588196 . + . gene\_id "XLOC\_040984"; transcript\_id "TCONS\_00068036"; exon\_number "2";  
oId "CUFF.75086.1"; tss\_id "TSS51603";  
chr4 Cufflinks exon190579804 190580135 . + . gene\_id "XLOC\_040984"; transcript\_id "TCONS\_00068038"; exon\_number "1";  
oId "CUFF.75086.3"; tss\_id "TSS51604";  
chr4 Cufflinks exon190581187 190581288 . + . gene\_id "XLOC\_040984"; transcript\_id "TCONS\_00068038"; exon\_number "2";  
oId "CUFF.75086.3"; tss\_id "TSS51604";  
chr4 Cufflinks exon190582096 190588196 . + . gene\_id "XLOC\_040984"; transcript\_id "TCONS\_00068038"; exon\_number "3";  
oId "CUFF.75086.3"; tss\_id "TSS51604";  
chr4 Cufflinks exon190959207 190959257 . + . gene\_id "XLOC\_040991"; transcript\_id "TCONS\_00068046"; exon\_number "1";  
oId "CUFF.75124.2"; tss\_id "TSS51612";  
chr4 Cufflinks exon190962065 190964013 . + . gene\_id "XLOC\_040991"; transcript\_id "TCONS\_00068046"; exon\_number "2";  
oId "CUFF.75124.2"; tss\_id "TSS51612";  
chr4 Cufflinks exon27124 28230 . - . gene\_id "XLOC\_040996"; transcript\_id "TCONS\_00068053"; exon\_number "1"; oId  
"CUFF.70030.2"; tss\_id "TSS51619";  
chr4 Cufflinks exon32244 32286 . - . gene\_id "XLOC\_040996"; transcript\_id "TCONS\_00068053"; exon\_number "2"; oId  
"CUFF.70030.2"; tss\_id "TSS51619";  
chr4 Cufflinks exon1575778 1576271 . - . gene\_id "XLOC\_041031"; transcript\_id "TCONS\_00068106"; exon\_number "1"; oId  
"CUFF.70211.1"; tss\_id "TSS51667";  
chr4 Cufflinks exon1581885 1582237 . - . gene\_id "XLOC\_041031"; transcript\_id "TCONS\_00068106"; exon\_number "2"; oId  
"CUFF.70211.1"; tss\_id "TSS51667";  
chr4 Cufflinks exon2466072 2466439 . - . gene\_id "XLOC\_041056"; transcript\_id "TCONS\_00068154"; exon\_number "1"; oId  
"CUFF.70274.2"; tss\_id "TSS51700";  
chr4 Cufflinks exon2470127 2470668 . - . gene\_id "XLOC\_041056"; transcript\_id "TCONS\_00068154"; exon\_number "2"; oId  
"CUFF.70274.2"; tss\_id "TSS51700";  
chr4 Cufflinks exon2466072 2466439 . - . gene\_id "XLOC\_041056"; transcript\_id "TCONS\_00068153"; exon\_number "1"; oId  
"CUFF.70274.1"; tss\_id "TSS51700";  
chr4 Cufflinks exon2469625 2469747 . - . gene\_id "XLOC\_041056"; transcript\_id "TCONS\_00068153"; exon\_number "2"; oId  
"CUFF.70274.1"; tss\_id "TSS51700";  
chr4 Cufflinks exon2470127 2470668 . - . gene\_id "XLOC\_041056"; transcript\_id "TCONS\_00068153"; exon\_number "3"; oId  
"CUFF.70274.1"; tss\_id "TSS51700";  
chr4 Cufflinks exon2466441 2468916 . - . gene\_id "XLOC\_041056"; transcript\_id "TCONS\_00068155"; exon\_number "1"; oId  
"CUFF.70274.3"; tss\_id "TSS51700";  
chr4 Cufflinks exon2469625 2470666 . - . gene\_id "XLOC\_041056"; transcript\_id "TCONS\_00068155"; exon\_number "2"; oId  
"CUFF.70274.3"; tss\_id "TSS51700";  
chr4 Cufflinks exon2466441 2468916 . - . gene\_id "XLOC\_041056"; transcript\_id "TCONS\_00068156"; exon\_number "1"; oId  
"CUFF.70274.4"; tss\_id "TSS51700";  
chr4 Cufflinks exon2470127 2470680 . - . gene\_id "XLOC\_041056"; transcript\_id "TCONS\_00068156"; exon\_number "2"; oId  
"CUFF.70274.4"; tss\_id "TSS51700";  
chr4 Cufflinks exon6672455 6672720 . - . gene\_id "XLOC\_041099"; transcript\_id "TCONS\_00068231"; exon\_number "1"; oId

"CUFF.70500.2"; tss\_id "TSS51755";  
chr4 Cufflinks exon6675411 6675608 . - . gene\_id "XLOC\_041099"; transcript\_id "TCONS\_00068231"; exon\_number "2"; oId  
"CUFF.70500.2"; tss\_id "TSS51755";  
chr4 Cufflinks exon6672455 6672726 . - . gene\_id "XLOC\_041099"; transcript\_id "TCONS\_00068230"; exon\_number "1"; oId  
"CUFF.70500.1"; tss\_id "TSS51755";  
chr4 Cufflinks exon6675411 6675608 . - . gene\_id "XLOC\_041099"; transcript\_id "TCONS\_00068230"; exon\_number "2"; oId  
"CUFF.70500.1"; tss\_id "TSS51755";  
chr4 Cufflinks exon10069808 10070771 . - . gene\_id "XLOC\_041137"; transcript\_id "TCONS\_00068293"; exon\_number "1";  
oId "CUFF.70685.1"; tss\_id "TSS51799";  
chr4 Cufflinks exon10071300 10071447 . - . gene\_id "XLOC\_041137"; transcript\_id "TCONS\_00068293"; exon\_number "2";  
oId "CUFF.70685.1"; tss\_id "TSS51799";  
chr4 Cufflinks exon12849397 12850318 . - . gene\_id "XLOC\_041153"; transcript\_id "TCONS\_00068313"; exon\_number "1";  
oId "CUFF.70843.1"; tss\_id "TSS51818";  
chr4 Cufflinks exon12974557 12974673 . - . gene\_id "XLOC\_041153"; transcript\_id "TCONS\_00068313"; exon\_number "2";  
oId "CUFF.70843.1"; tss\_id "TSS51818";  
chr4 Cufflinks exon13148156 13148285 . - . gene\_id "XLOC\_041153"; transcript\_id "TCONS\_00068313"; exon\_number "3";  
oId "CUFF.70843.1"; tss\_id "TSS51818";  
chr4 Cufflinks exon13334009 13334092 . - . gene\_id "XLOC\_041153"; transcript\_id "TCONS\_00068313"; exon\_number "4";  
oId "CUFF.70843.1"; tss\_id "TSS51818";  
chr4 Cufflinks exon13338517 13338653 . - . gene\_id "XLOC\_041153"; transcript\_id "TCONS\_00068313"; exon\_number "5";  
oId "CUFF.70843.1"; tss\_id "TSS51818";  
chr4 Cufflinks exon13339028 13339127 . - . gene\_id "XLOC\_041153"; transcript\_id "TCONS\_00068313"; exon\_number "6";  
oId "CUFF.70843.1"; tss\_id "TSS51818";  
chr4 Cufflinks exon13343863 13343873 . - . gene\_id "XLOC\_041153"; transcript\_id "TCONS\_00068313"; exon\_number "7";  
oId "CUFF.70843.1"; tss\_id "TSS51818";  
chr4 Cufflinks exon12890061 12890347 . - . gene\_id "XLOC\_041153"; transcript\_id "TCONS\_00068318"; exon\_number "1";  
oId "CUFF.70843.2"; tss\_id "TSS51819";  
chr4 Cufflinks exon12974561 12974673 . - . gene\_id "XLOC\_041153"; transcript\_id "TCONS\_00068318"; exon\_number "2";  
oId "CUFF.70843.2"; tss\_id "TSS51819";  
chr4 Cufflinks exon13206060 13206184 . - . gene\_id "XLOC\_041153"; transcript\_id "TCONS\_00068318"; exon\_number "3";  
oId "CUFF.70843.2"; tss\_id "TSS51819";  
chr4 Cufflinks exon13338517 13338653 . - . gene\_id "XLOC\_041153"; transcript\_id "TCONS\_00068318"; exon\_number "4";  
oId "CUFF.70843.2"; tss\_id "TSS51819";  
chr4 Cufflinks exon13339028 13339046 . - . gene\_id "XLOC\_041153"; transcript\_id "TCONS\_00068318"; exon\_number "5";  
oId "CUFF.70843.2"; tss\_id "TSS51819";  
chr4 Cufflinks exon 12973446 12974673 . - . gene\_id "XLOC\_041153"; transcript\_id "TCONS\_00068340";  
exon\_number "1"; oId "CUFF.70843.3"; tss\_id "TSS51818";  
chr4 Cufflinks exon 13148156 13148285 . - . gene\_id "XLOC\_041153"; transcript\_id "TCONS\_00068340";  
exon\_number "2"; oId "CUFF.70843.3"; tss\_id "TSS51818";  
chr4 Cufflinks exon 13334009 13334092 . - . gene\_id "XLOC\_041153"; transcript\_id "TCONS\_00068340";  
exon\_number "3"; oId "CUFF.70843.3"; tss\_id "TSS51818";  
chr4 Cufflinks exon 13338517 13338653 . - . gene\_id "XLOC\_041153"; transcript\_id "TCONS\_00068340";  
exon\_number "4"; oId "CUFF.70843.3"; tss\_id "TSS51818";

|      |             |      |                     |                    |   |   |   |                                                        |
|------|-------------|------|---------------------|--------------------|---|---|---|--------------------------------------------------------|
| chr4 | Cufflinks   | exon | 13339028            | 13339127           | . | - | . | gene_id "XLOC_041153"; transcript_id "TCONS_00068340"; |
|      | exon_number | "5"; | oId "CUFF.70843.3"; | tss_id "TSS51818"; |   |   |   |                                                        |
| chr4 | Cufflinks   | exon | 13343863            | 13343873           | . | - | . | gene_id "XLOC_041153"; transcript_id "TCONS_00068340"; |
|      | exon_number | "6"; | oId "CUFF.70843.3"; | tss_id "TSS51818"; |   |   |   |                                                        |
| chr4 | Cufflinks   | exon | 13187574            | 13192778           | . | - | . | gene_id "XLOC_041153"; transcript_id "TCONS_00068378"; |
|      | exon_number | "1"; | oId "CUFF.70843.5"; | tss_id "TSS51821"; |   |   |   |                                                        |
| chr4 | Cufflinks   | exon | 13279996            | 13280054           | . | - | . | gene_id "XLOC_041153"; transcript_id "TCONS_00068378"; |
|      | exon_number | "2"; | oId "CUFF.70843.5"; | tss_id "TSS51821"; |   |   |   |                                                        |
| chr4 | Cufflinks   | exon | 13187574            | 13192778           | . | - | . | gene_id "XLOC_041153"; transcript_id "TCONS_00068379"; |
|      | exon_number | "1"; | oId "CUFF.70843.6"; | tss_id "TSS51819"; |   |   |   |                                                        |
| chr4 | Cufflinks   | exon | 13338517            | 13338653           | . | - | . | gene_id "XLOC_041153"; transcript_id "TCONS_00068379"; |
|      | exon_number | "2"; | oId "CUFF.70843.6"; | tss_id "TSS51819"; |   |   |   |                                                        |
| chr4 | Cufflinks   | exon | 13339028            | 13339046           | . | - | . | gene_id "XLOC_041153"; transcript_id "TCONS_00068379"; |
|      | exon_number | "3"; | oId "CUFF.70843.6"; | tss_id "TSS51819"; |   |   |   |                                                        |
| chr4 | Cufflinks   | exon | 15657935            | 15657962           | . | - | . | gene_id "XLOC_041277"; transcript_id "TCONS_00068464"; |
|      | exon_number | "1"; | oId "CUFF.71090.1"; | tss_id "TSS51957"; |   |   |   |                                                        |
| chr4 | Cufflinks   | exon | 15661364            | 15661545           | . | - | . | gene_id "XLOC_041277"; transcript_id "TCONS_00068464"; |
|      | exon_number | "2"; | oId "CUFF.71090.1"; | tss_id "TSS51957"; |   |   |   |                                                        |
| chr4 | Cufflinks   | exon | 15665898            | 15665977           | . | - | . | gene_id "XLOC_041277"; transcript_id "TCONS_00068464"; |
|      | exon_number | "3"; | oId "CUFF.71090.1"; | tss_id "TSS51957"; |   |   |   |                                                        |
| chr4 | Cufflinks   | exon | 15668999            | 15669663           | . | - | . | gene_id "XLOC_041277"; transcript_id "TCONS_00068464"; |
|      | exon_number | "4"; | oId "CUFF.71090.1"; | tss_id "TSS51957"; |   |   |   |                                                        |
| chr4 | Cufflinks   | exon | 15682903            | 15683353           | . | - | . | gene_id "XLOC_041277"; transcript_id "TCONS_00068464"; |
|      | exon_number | "5"; | oId "CUFF.71090.1"; | tss_id "TSS51957"; |   |   |   |                                                        |
| chr4 | Cufflinks   | exon | 15661514            | 15661545           | . | - | . | gene_id "XLOC_041277"; transcript_id "TCONS_00068465"; |
|      | exon_number | "1"; | oId "CUFF.71090.2"; | tss_id "TSS51957"; |   |   |   |                                                        |
| chr4 | Cufflinks   | exon | 15668999            | 15669663           | . | - | . | gene_id "XLOC_041277"; transcript_id "TCONS_00068465"; |
|      | exon_number | "2"; | oId "CUFF.71090.2"; | tss_id "TSS51957"; |   |   |   |                                                        |
| chr4 | Cufflinks   | exon | 15682976            | 15683353           | . | - | . | gene_id "XLOC_041277"; transcript_id "TCONS_00068465"; |
|      | exon_number | "3"; | oId "CUFF.71090.2"; | tss_id "TSS51957"; |   |   |   |                                                        |
| chr4 | Cufflinks   | exon | 17600225            | 17600324           | . | - | . | gene_id "XLOC_041288"; transcript_id "TCONS_00068493"; |
|      | exon_number | "1"; | oId "CUFF.71153.1"; | tss_id "TSS51980"; |   |   |   |                                                        |
| chr4 | Cufflinks   | exon | 17615555            | 17615661           | . | - | . | gene_id "XLOC_041288"; transcript_id "TCONS_00068493"; |
|      | exon_number | "2"; | oId "CUFF.71153.1"; | tss_id "TSS51980"; |   |   |   |                                                        |
| chr4 | Cufflinks   | exon | 17615765            | 17616187           | . | - | . | gene_id "XLOC_041288"; transcript_id "TCONS_00068493"; |
|      | exon_number | "3"; | oId "CUFF.71153.1"; | tss_id "TSS51980"; |   |   |   |                                                        |
| chr4 | Cufflinks   | exon | 22327285            | 22329512           | . | - | . | gene_id "XLOC_041308"; transcript_id "TCONS_00068514"; |
|      | exon_number | "1"; | oId "CUFF.71239.1"; | tss_id "TSS52000"; |   |   |   |                                                        |
| chr4 | Cufflinks   | exon | 22331480            | 22331627           | . | - | . | gene_id "XLOC_041308"; transcript_id "TCONS_00068514"; |
|      | exon_number | "2"; | oId "CUFF.71239.1"; | tss_id "TSS52000"; |   |   |   |                                                        |
| chr4 | Cufflinks   | exon | 22336664            | 22336790           | . | - | . | gene_id "XLOC_041308"; transcript_id "TCONS_00068514"; |
|      | exon_number | "3"; | oId "CUFF.71239.1"; | tss_id "TSS52000"; |   |   |   |                                                        |
| chr4 | Cufflinks   | exon | 22341203            | 22341289           | . | - | . | gene_id "XLOC_041308"; transcript_id "TCONS_00068514"; |

exon\_number "4"; oId "CUFF.71239.1"; tss\_id "TSS52000";  
 chr4 Cufflinks exon 22327285 22329512 . - . gene\_id "XLOC\_041308"; transcript\_id "TCONS\_00068515";  
 exon\_number "1"; oId "CUFF.71239.2"; tss\_id "TSS52001";  
 chr4 Cufflinks exon 22331480 22331627 . - . gene\_id "XLOC\_041308"; transcript\_id "TCONS\_00068515";  
 exon\_number "2"; oId "CUFF.71239.2"; tss\_id "TSS52001";  
 chr4 Cufflinks exon 22336664 22336790 . - . gene\_id "XLOC\_041308"; transcript\_id "TCONS\_00068515";  
 exon\_number "3"; oId "CUFF.71239.2"; tss\_id "TSS52001";  
 chr4 Cufflinks exon22348356 22349277 . - . gene\_id "XLOC\_041308"; transcript\_id "TCONS\_00068515"; exon\_number  
 "4"; oId "CUFF.71239.2"; tss\_id "TSS52001";  
 chr4 Cufflinks exon22327285 22329512 . - . gene\_id "XLOC\_041308"; transcript\_id "TCONS\_00068516"; exon\_number "1";  
 oId "CUFF.71239.3"; tss\_id "TSS52002";  
 chr4 Cufflinks exon22331480 22331627 . - . gene\_id "XLOC\_041308"; transcript\_id "TCONS\_00068516"; exon\_number "2";  
 oId "CUFF.71239.3"; tss\_id "TSS52002";  
 chr4 Cufflinks exon22336664 22336790 . - . gene\_id "XLOC\_041308"; transcript\_id "TCONS\_00068516"; exon\_number "3";  
 oId "CUFF.71239.3"; tss\_id "TSS52002";  
 chr4 Cufflinks exon22348356 22348446 . - . gene\_id "XLOC\_041308"; transcript\_id "TCONS\_00068516"; exon\_number "4";  
 oId "CUFF.71239.3"; tss\_id "TSS52002";  
 chr4 Cufflinks exon22365864 22365930 . - . gene\_id "XLOC\_041308"; transcript\_id "TCONS\_00068516"; exon\_number "5";  
 oId "CUFF.71239.3"; tss\_id "TSS52002";  
 chr4 Cufflinks exon22346794 22346968 . - . gene\_id "XLOC\_041308"; transcript\_id "TCONS\_00068519"; exon\_number "1";  
 oId "CUFF.71239.4"; tss\_id "TSS52003";  
 chr4 Cufflinks exon22348356 22348446 . - . gene\_id "XLOC\_041308"; transcript\_id "TCONS\_00068519"; exon\_number "2";  
 oId "CUFF.71239.4"; tss\_id "TSS52003";  
 chr4 Cufflinks exon22351061 22351088 . - . gene\_id "XLOC\_041308"; transcript\_id "TCONS\_00068519"; exon\_number "3";  
 oId "CUFF.71239.4"; tss\_id "TSS52003";  
 chr4 Cufflinks exon26861246 26861650 . - . gene\_id "XLOC\_041337"; transcript\_id "TCONS\_00068560"; exon\_number "1";  
 oId "CUFF.71379.1"; tss\_id "TSS52040";  
 chr4 Cufflinks exon26861760 26861866 . - . gene\_id "XLOC\_041337"; transcript\_id "TCONS\_00068560"; exon\_number "2";  
 oId "CUFF.71379.1"; tss\_id "TSS52040";  
 chr4 Cufflinks exon26861246 26861650 . - . gene\_id "XLOC\_041337"; transcript\_id "TCONS\_00068562"; exon\_number "1";  
 oId "CUFF.71379.3"; tss\_id "TSS52041";  
 chr4 Cufflinks exon26862132 26862221 . - . gene\_id "XLOC\_041337"; transcript\_id "TCONS\_00068562"; exon\_number "2";  
 oId "CUFF.71379.3"; tss\_id "TSS52041";  
 chr4 Cufflinks exon26861246 26861650 . - . gene\_id "XLOC\_041337"; transcript\_id "TCONS\_00068561"; exon\_number "1";  
 oId "CUFF.71379.2"; tss\_id "TSS52041";  
 chr4 Cufflinks exon26861963 26862221 . - . gene\_id "XLOC\_041337"; transcript\_id "TCONS\_00068561"; exon\_number "2";  
 oId "CUFF.71379.2"; tss\_id "TSS52041";  
 chr4 Cufflinks exon36007024 36008668 . - . gene\_id "XLOC\_041343"; transcript\_id "TCONS\_00068568"; exon\_number "1";  
 oId "CUFF.71406.2"; tss\_id "TSS52047";  
 chr4 Cufflinks exon36014185 36014453 . - . gene\_id "XLOC\_041343"; transcript\_id "TCONS\_00068568"; exon\_number "2";  
 oId "CUFF.71406.2"; tss\_id "TSS52047";  
 chr4 Cufflinks exon36020766 36020908 . - . gene\_id "XLOC\_041343"; transcript\_id "TCONS\_00068568"; exon\_number "3";  
 oId "CUFF.71406.2"; tss\_id "TSS52047";

|                                        |           |   |   |   |                                                                         |
|----------------------------------------|-----------|---|---|---|-------------------------------------------------------------------------|
| chr4 Cufflinks exon36047601            | 36047698  | . | - | . | gene_id "XLOC_041343"; transcript_id "TCONS_00068568"; exon_number "4"; |
| oId "CUFF.71406.2"; tss_id "TSS52047"; |           |   |   |   |                                                                         |
| chr4 Cufflinks exon36048332            | 36053609  | . | - | . | gene_id "XLOC_041343"; transcript_id "TCONS_00068568"; exon_number "5"; |
| oId "CUFF.71406.2"; tss_id "TSS52047"; |           |   |   |   |                                                                         |
| chr4 Cufflinks exon36017227            | 36017254  | . | - | . | gene_id "XLOC_041343"; transcript_id "TCONS_00068570"; exon_number "1"; |
| oId "CUFF.71406.3"; tss_id "TSS52047"; |           |   |   |   |                                                                         |
| chr4 Cufflinks exon36020766            | 36020908  | . | - | . | gene_id "XLOC_041343"; transcript_id "TCONS_00068570"; exon_number "2"; |
| oId "CUFF.71406.3"; tss_id "TSS52047"; |           |   |   |   |                                                                         |
| chr4 Cufflinks exon36047601            | 36047698  | . | - | . | gene_id "XLOC_041343"; transcript_id "TCONS_00068570"; exon_number "3"; |
| oId "CUFF.71406.3"; tss_id "TSS52047"; |           |   |   |   |                                                                         |
| chr4 Cufflinks exon36048332            | 36053609  | . | - | . | gene_id "XLOC_041343"; transcript_id "TCONS_00068570"; exon_number "4"; |
| oId "CUFF.71406.3"; tss_id "TSS52047"; |           |   |   |   |                                                                         |
| chr4 Cufflinks exon46725676            | 46726004  | . | - | . | gene_id "XLOC_041410"; transcript_id "TCONS_00068667"; exon_number "1"; |
| oId "CUFF.71674.3"; tss_id "TSS52122"; |           |   |   |   |                                                                         |
| chr4 Cufflinks exon46726389            | 46726565  | . | - | . | gene_id "XLOC_041410"; transcript_id "TCONS_00068667"; exon_number "2"; |
| oId "CUFF.71674.3"; tss_id "TSS52122"; |           |   |   |   |                                                                         |
| chr4 Cufflinks exon46725676            | 46726002  | . | - | . | gene_id "XLOC_041410"; transcript_id "TCONS_00068669"; exon_number "1"; |
| oId "CUFF.71674.2"; tss_id "TSS52122"; |           |   |   |   |                                                                         |
| chr4 Cufflinks exon46726387            | 46726647  | . | - | . | gene_id "XLOC_041410"; transcript_id "TCONS_00068669"; exon_number "2"; |
| oId "CUFF.71674.2"; tss_id "TSS52122"; |           |   |   |   |                                                                         |
| chr4 Cufflinks exon77952171            | 77952472  | . | - | . | gene_id "XLOC_041529"; transcript_id "TCONS_00068901"; exon_number "1"; |
| oId "CUFF.72357.1"; tss_id "TSS52280"; |           |   |   |   |                                                                         |
| chr4 Cufflinks exon77961774            | 77961874  | . | - | . | gene_id "XLOC_041529"; transcript_id "TCONS_00068901"; exon_number "2"; |
| oId "CUFF.72357.1"; tss_id "TSS52280"; |           |   |   |   |                                                                         |
| chr4 Cufflinks exon81002638            | 81018783  | . | - | . | gene_id "XLOC_041548"; transcript_id "TCONS_00068925"; exon_number "1"; |
| oId "CUFF.72428.1"; tss_id "TSS52303"; |           |   |   |   |                                                                         |
| chr4 Cufflinks exon81018891            | 81019115  | . | - | . | gene_id "XLOC_041548"; transcript_id "TCONS_00068925"; exon_number "2"; |
| oId "CUFF.72428.1"; tss_id "TSS52303"; |           |   |   |   |                                                                         |
| chr4 Cufflinks exon81042302            | 81042431  | . | - | . | gene_id "XLOC_041548"; transcript_id "TCONS_00068925"; exon_number "3"; |
| oId "CUFF.72428.1"; tss_id "TSS52303"; |           |   |   |   |                                                                         |
| chr4 Cufflinks exon81046540            | 81046828  | . | - | . | gene_id "XLOC_041548"; transcript_id "TCONS_00068925"; exon_number "4"; |
| oId "CUFF.72428.1"; tss_id "TSS52303"; |           |   |   |   |                                                                         |
| chr4 Cufflinks exon81002638            | 81018783  | . | - | . | gene_id "XLOC_041548"; transcript_id "TCONS_00068926"; exon_number "1"; |
| oId "CUFF.72428.2"; tss_id "TSS52304"; |           |   |   |   |                                                                         |
| chr4 Cufflinks exon81018891            | 81019115  | . | - | . | gene_id "XLOC_041548"; transcript_id "TCONS_00068926"; exon_number "2"; |
| oId "CUFF.72428.2"; tss_id "TSS52304"; |           |   |   |   |                                                                         |
| chr4 Cufflinks exon81046540            | 81047124  | . | - | . | gene_id "XLOC_041548"; transcript_id "TCONS_00068926"; exon_number "3"; |
| oId "CUFF.72428.2"; tss_id "TSS52304"; |           |   |   |   |                                                                         |
| chr4 Cufflinks exon83816950            | 83817743  | . | - | . | gene_id "XLOC_041576"; transcript_id "TCONS_00068980"; exon_number "1"; |
| oId "CUFF.72510.1"; tss_id "TSS52340"; |           |   |   |   |                                                                         |
| chr4 Cufflinks exon84046689            | 84046722  | . | - | . | gene_id "XLOC_041576"; transcript_id "TCONS_00068980"; exon_number "2"; |
| oId "CUFF.72510.1"; tss_id "TSS52340"; |           |   |   |   |                                                                         |
| chr4 Cufflinks exon101732597           | 101733825 | . | - | . | gene_id "XLOC_041670"; transcript_id "TCONS_00069154"; exon_number "1"; |

oId "CUFF.72878.2"; tss\_id "TSS52465";  
chr4 Cufflinks exon101735371 101735435 . - . gene\_id "XLOC\_041670"; transcript\_id "TCONS\_00069154"; exon\_number "2";  
oId "CUFF.72878.2"; tss\_id "TSS52465";  
chr4 Cufflinks exon101737125 101737239 . - . gene\_id "XLOC\_041670"; transcript\_id "TCONS\_00069154"; exon\_number "3";  
oId "CUFF.72878.2"; tss\_id "TSS52465";  
chr4 Cufflinks exon101771968 101772020 . - . gene\_id "XLOC\_041670"; transcript\_id "TCONS\_00069154"; exon\_number "4";  
oId "CUFF.72878.2"; tss\_id "TSS52465";  
chr4 Cufflinks exon101773794 101773837 . - . gene\_id "XLOC\_041670"; transcript\_id "TCONS\_00069154"; exon\_number "5";  
oId "CUFF.72878.2"; tss\_id "TSS52465";  
chr4 Cufflinks exon101801161 101801288 . - . gene\_id "XLOC\_041670"; transcript\_id "TCONS\_00069154"; exon\_number "6";  
oId "CUFF.72878.2"; tss\_id "TSS52465";  
chr4 Cufflinks exon101732597 101735435 . - . gene\_id "XLOC\_041670"; transcript\_id "TCONS\_00069153"; exon\_number "1";  
oId "CUFF.72878.1"; tss\_id "TSS52465";  
chr4 Cufflinks exon101737125 101737239 . - . gene\_id "XLOC\_041670"; transcript\_id "TCONS\_00069153"; exon\_number "2";  
oId "CUFF.72878.1"; tss\_id "TSS52465";  
chr4 Cufflinks exon101773794 101773839 . - . gene\_id "XLOC\_041670"; transcript\_id "TCONS\_00069153"; exon\_number "3";  
oId "CUFF.72878.1"; tss\_id "TSS52465";  
chr4 Cufflinks exon101801161 101801288 . - . gene\_id "XLOC\_041670"; transcript\_id "TCONS\_00069153"; exon\_number "4";  
oId "CUFF.72878.1"; tss\_id "TSS52465";  
chr4 Cufflinks exon101732597 101733825 . - . gene\_id "XLOC\_041670"; transcript\_id "TCONS\_00069157"; exon\_number "1";  
oId "CUFF.72878.5"; tss\_id "TSS52465";  
chr4 Cufflinks exon101735371 101735435 . - . gene\_id "XLOC\_041670"; transcript\_id "TCONS\_00069157"; exon\_number "2";  
oId "CUFF.72878.5"; tss\_id "TSS52465";  
chr4 Cufflinks exon101737125 101737239 . - . gene\_id "XLOC\_041670"; transcript\_id "TCONS\_00069157"; exon\_number "3";  
oId "CUFF.72878.5"; tss\_id "TSS52465";  
chr4 Cufflinks exon101773794 101773837 . - . gene\_id "XLOC\_041670"; transcript\_id "TCONS\_00069157"; exon\_number "4";  
oId "CUFF.72878.5"; tss\_id "TSS52465";  
chr4 Cufflinks exon101801161 101801291 . - . gene\_id "XLOC\_041670"; transcript\_id "TCONS\_00069157"; exon\_number "5";  
oId "CUFF.72878.5"; tss\_id "TSS52465";  
chr4 Cufflinks exon101732597 101733825 . - . gene\_id "XLOC\_041670"; transcript\_id "TCONS\_00069156"; exon\_number "1";  
oId "CUFF.72878.4"; tss\_id "TSS52465";  
chr4 Cufflinks exon101737125 101737239 . - . gene\_id "XLOC\_041670"; transcript\_id "TCONS\_00069156"; exon\_number "2";  
oId "CUFF.72878.4"; tss\_id "TSS52465";  
chr4 Cufflinks exon101773794 101773837 . - . gene\_id "XLOC\_041670"; transcript\_id "TCONS\_00069156"; exon\_number "3";  
oId "CUFF.72878.4"; tss\_id "TSS52465";  
chr4 Cufflinks exon101801161 101801291 . - . gene\_id "XLOC\_041670"; transcript\_id "TCONS\_00069156"; exon\_number "4";  
oId "CUFF.72878.4"; tss\_id "TSS52465";  
chr4 Cufflinks exon101732597 101735435 . - . gene\_id "XLOC\_041670"; transcript\_id "TCONS\_00069155"; exon\_number "1";  
oId "CUFF.72878.3"; tss\_id "TSS52465";  
chr4 Cufflinks exon101737125 101737239 . - . gene\_id "XLOC\_041670"; transcript\_id "TCONS\_00069155"; exon\_number "2";  
oId "CUFF.72878.3"; tss\_id "TSS52465";  
chr4 Cufflinks exon101773794 101773837 . - . gene\_id "XLOC\_041670"; transcript\_id "TCONS\_00069155"; exon\_number "3";  
oId "CUFF.72878.3"; tss\_id "TSS52465";

|                                        |           |   |   |   |                                                                         |
|----------------------------------------|-----------|---|---|---|-------------------------------------------------------------------------|
| chr4 Cufflinks exon101801161           | 101801291 | . | - | . | gene_id "XLOC_041670"; transcript_id "TCONS_00069155"; exon_number "4"; |
| oId "CUFF.72878.3"; tss_id "TSS52465"; |           |   |   |   |                                                                         |
| chr4 Cufflinks exon108828816           | 108831707 | . | - | . | gene_id "XLOC_041739"; transcript_id "TCONS_00069266"; exon_number "1"; |
| oId "CUFF.73071.1"; tss_id "TSS52551"; |           |   |   |   |                                                                         |
| chr4 Cufflinks exon108910726           | 108910864 | . | - | . | gene_id "XLOC_041739"; transcript_id "TCONS_00069266"; exon_number "2"; |
| oId "CUFF.73071.1"; tss_id "TSS52551"; |           |   |   |   |                                                                         |
| chr4 Cufflinks exon108857662           | 108857729 | . | - | . | gene_id "XLOC_041739"; transcript_id "TCONS_00069267"; exon_number "1"; |
| oId "CUFF.73071.2"; tss_id "TSS52551"; |           |   |   |   |                                                                         |
| chr4 Cufflinks exon108858503           | 108858556 | . | - | . | gene_id "XLOC_041739"; transcript_id "TCONS_00069267"; exon_number "2"; |
| oId "CUFF.73071.2"; tss_id "TSS52551"; |           |   |   |   |                                                                         |
| chr4 Cufflinks exon108910733           | 108910862 | . | - | . | gene_id "XLOC_041739"; transcript_id "TCONS_00069267"; exon_number "3"; |
| oId "CUFF.73071.2"; tss_id "TSS52551"; |           |   |   |   |                                                                         |
| chr4 Cufflinks exon109239704           | 109239744 | . | - | . | gene_id "XLOC_041745"; transcript_id "TCONS_00069278"; exon_number "1"; |
| oId "CUFF.73145.1"; tss_id "TSS52559"; |           |   |   |   |                                                                         |
| chr4 Cufflinks exon109245556           | 109245637 | . | - | . | gene_id "XLOC_041745"; transcript_id "TCONS_00069278"; exon_number "2"; |
| oId "CUFF.73145.1"; tss_id "TSS52559"; |           |   |   |   |                                                                         |
| chr4 Cufflinks exon109258322           | 109262488 | . | - | . | gene_id "XLOC_041745"; transcript_id "TCONS_00069278"; exon_number "3"; |
| oId "CUFF.73145.1"; tss_id "TSS52559"; |           |   |   |   |                                                                         |
| chr4 Cufflinks exon109276726           | 109276857 | . | - | . | gene_id "XLOC_041745"; transcript_id "TCONS_00069278"; exon_number "4"; |
| oId "CUFF.73145.1"; tss_id "TSS52559"; |           |   |   |   |                                                                         |
| chr4 Cufflinks exon109258092           | 109259852 | . | - | . | gene_id "XLOC_041745"; transcript_id "TCONS_00069279"; exon_number "1"; |
| oId "CUFF.73145.3"; tss_id "TSS52559"; |           |   |   |   |                                                                         |
| chr4 Cufflinks exon109262403           | 109262483 | . | - | . | gene_id "XLOC_041745"; transcript_id "TCONS_00069279"; exon_number "2"; |
| oId "CUFF.73145.3"; tss_id "TSS52559"; |           |   |   |   |                                                                         |
| chr4 Cufflinks exon109276721           | 109276845 | . | - | . | gene_id "XLOC_041745"; transcript_id "TCONS_00069279"; exon_number "3"; |
| oId "CUFF.73145.3"; tss_id "TSS52559"; |           |   |   |   |                                                                         |
| chr4 Cufflinks exon109258092           | 109262241 | . | - | . | gene_id "XLOC_041745"; transcript_id "TCONS_00069280"; exon_number "1"; |
| oId "CUFF.73145.2"; tss_id "TSS52559"; |           |   |   |   |                                                                         |
| chr4 Cufflinks exon109262403           | 109262483 | . | - | . | gene_id "XLOC_041745"; transcript_id "TCONS_00069280"; exon_number "2"; |
| oId "CUFF.73145.2"; tss_id "TSS52559"; |           |   |   |   |                                                                         |
| chr4 Cufflinks exon109276721           | 109276857 | . | - | . | gene_id "XLOC_041745"; transcript_id "TCONS_00069280"; exon_number "3"; |
| oId "CUFF.73145.2"; tss_id "TSS52559"; |           |   |   |   |                                                                         |
| chr4 Cufflinks exon109258092           | 109259852 | . | - | . | gene_id "XLOC_041745"; transcript_id "TCONS_00069281"; exon_number "1"; |
| oId "CUFF.73145.4"; tss_id "TSS52560"; |           |   |   |   |                                                                         |
| chr4 Cufflinks exon109261728           | 109262241 | . | - | . | gene_id "XLOC_041745"; transcript_id "TCONS_00069281"; exon_number "2"; |
| oId "CUFF.73145.4"; tss_id "TSS52560"; |           |   |   |   |                                                                         |
| chr4 Cufflinks exon109262403           | 109262485 | . | - | . | gene_id "XLOC_041745"; transcript_id "TCONS_00069281"; exon_number "3"; |
| oId "CUFF.73145.4"; tss_id "TSS52560"; |           |   |   |   |                                                                         |
| chr4 Cufflinks exon109276723           | 109276998 | . | - | . | gene_id "XLOC_041745"; transcript_id "TCONS_00069281"; exon_number "4"; |
| oId "CUFF.73145.4"; tss_id "TSS52560"; |           |   |   |   |                                                                         |
| chr4 Cufflinks exon109258092           | 109259852 | . | - | . | gene_id "XLOC_041745"; transcript_id "TCONS_00069282"; exon_number "1"; |
| oId "CUFF.73145.5"; tss_id "TSS52561"; |           |   |   |   |                                                                         |
| chr4 Cufflinks exon109261728           | 109262241 | . | - | . | gene_id "XLOC_041745"; transcript_id "TCONS_00069282"; exon_number "2"; |

oId "CUFF.73145.5"; tss\_id "TSS52561";  
chr4 Cufflinks exon109262403 109262483 . - . gene\_id "XLOC\_041745"; transcript\_id "TCONS\_00069282"; exon\_number "3";  
oId "CUFF.73145.5"; tss\_id "TSS52561";  
chr4 Cufflinks exon109280934 109280966 . - . gene\_id "XLOC\_041745"; transcript\_id "TCONS\_00069282"; exon\_number "4";  
oId "CUFF.73145.5"; tss\_id "TSS52561";  
chr4 Cufflinks exon109281693 109281822 . - . gene\_id "XLOC\_041745"; transcript\_id "TCONS\_00069282"; exon\_number "5";  
oId "CUFF.73145.5"; tss\_id "TSS52561";  
chr4 Cufflinks exon109279818 109280797 . - . gene\_id "XLOC\_041745"; transcript\_id "TCONS\_00069288"; exon\_number "1";  
oId "CUFF.73145.7"; tss\_id "TSS52563";  
chr4 Cufflinks exon109280934 109280966 . - . gene\_id "XLOC\_041745"; transcript\_id "TCONS\_00069288"; exon\_number "2";  
oId "CUFF.73145.7"; tss\_id "TSS52563";  
chr4 Cufflinks exon109281245 109281268 . - . gene\_id "XLOC\_041745"; transcript\_id "TCONS\_00069288"; exon\_number "3";  
oId "CUFF.73145.7"; tss\_id "TSS52563";  
chr4 Cufflinks exon109279818 109280967 . - . gene\_id "XLOC\_041745"; transcript\_id "TCONS\_00069289"; exon\_number "1";  
oId "CUFF.73145.9"; tss\_id "TSS52561";  
chr4 Cufflinks exon109281694 109281757 . - . gene\_id "XLOC\_041745"; transcript\_id "TCONS\_00069289"; exon\_number "2";  
oId "CUFF.73145.9"; tss\_id "TSS52561";  
chr4 Cufflinks exon118880011 118880044 . - . gene\_id "XLOC\_041830"; transcript\_id "TCONS\_00069402"; exon\_number "1";  
oId "CUFF.73413.2"; tss\_id "TSS52660";  
chr4 Cufflinks exon119047157 119047257 . - . gene\_id "XLOC\_041830"; transcript\_id "TCONS\_00069402"; exon\_number "2";  
oId "CUFF.73413.2"; tss\_id "TSS52660";  
chr4 Cufflinks exon119054702 119054764 . - . gene\_id "XLOC\_041830"; transcript\_id "TCONS\_00069402"; exon\_number "3";  
oId "CUFF.73413.2"; tss\_id "TSS52660";  
chr4 Cufflinks exon119125315 119125437 . - . gene\_id "XLOC\_041830"; transcript\_id "TCONS\_00069402"; exon\_number "4";  
oId "CUFF.73413.2"; tss\_id "TSS52660";  
chr4 Cufflinks exon119142634 119142803 . - . gene\_id "XLOC\_041830"; transcript\_id "TCONS\_00069402"; exon\_number "5";  
oId "CUFF.73413.2"; tss\_id "TSS52660";  
chr4 Cufflinks exon118880011 118880044 . - . gene\_id "XLOC\_041830"; transcript\_id "TCONS\_00069401"; exon\_number "1";  
oId "CUFF.73413.1"; tss\_id "TSS52660";  
chr4 Cufflinks exon119047157 119047259 . - . gene\_id "XLOC\_041830"; transcript\_id "TCONS\_00069401"; exon\_number "2";  
oId "CUFF.73413.1"; tss\_id "TSS52660";  
chr4 Cufflinks exon119054702 119054764 . - . gene\_id "XLOC\_041830"; transcript\_id "TCONS\_00069401"; exon\_number "3";  
oId "CUFF.73413.1"; tss\_id "TSS52660";  
chr4 Cufflinks exon119125315 119125437 . - . gene\_id "XLOC\_041830"; transcript\_id "TCONS\_00069401"; exon\_number "4";  
oId "CUFF.73413.1"; tss\_id "TSS52660";  
chr4 Cufflinks exon119142634 119142803 . - . gene\_id "XLOC\_041830"; transcript\_id "TCONS\_00069401"; exon\_number "5";  
oId "CUFF.73413.1"; tss\_id "TSS52660";  
chr4 Cufflinks exon136787360 136788337 . - . gene\_id "XLOC\_041915"; transcript\_id "TCONS\_00069534"; exon\_number "1";  
oId "CUFF.73833.1"; tss\_id "TSS52764";  
chr4 Cufflinks exon136789001 136789061 . - . gene\_id "XLOC\_041915"; transcript\_id "TCONS\_00069534"; exon\_number "2";  
oId "CUFF.73833.1"; tss\_id "TSS52764";  
chr4 Cufflinks exon136793933 136794137 . - . gene\_id "XLOC\_041915"; transcript\_id "TCONS\_00069534"; exon\_number "3";  
oId "CUFF.73833.1"; tss\_id "TSS52764";



|                                        |           |   |   |   |                                                                         |
|----------------------------------------|-----------|---|---|---|-------------------------------------------------------------------------|
| chr4 Cufflinks exon136787360           | 136788337 | . | - | . | gene_id "XLOC_041915"; transcript_id "TCONS_00069536"; exon_number "1"; |
| oId "CUFF.73833.3"; tss_id "TSS52765"; |           |   |   |   |                                                                         |
| chr4 Cufflinks exon136788991           | 136789061 | . | - | . | gene_id "XLOC_041915"; transcript_id "TCONS_00069536"; exon_number "2"; |
| oId "CUFF.73833.3"; tss_id "TSS52765"; |           |   |   |   |                                                                         |
| chr4 Cufflinks exon136806572           | 136806651 | . | - | . | gene_id "XLOC_041915"; transcript_id "TCONS_00069536"; exon_number "3"; |
| oId "CUFF.73833.3"; tss_id "TSS52765"; |           |   |   |   |                                                                         |
| chr4 Cufflinks exon136809126           | 136809259 | . | - | . | gene_id "XLOC_041915"; transcript_id "TCONS_00069536"; exon_number "4"; |
| oId "CUFF.73833.3"; tss_id "TSS52765"; |           |   |   |   |                                                                         |
| chr4 Cufflinks exon136787360           | 136788337 | . | - | . | gene_id "XLOC_041915"; transcript_id "TCONS_00069535"; exon_number "1"; |
| oId "CUFF.73833.2"; tss_id "TSS52765"; |           |   |   |   |                                                                         |
| chr4 Cufflinks exon136789001           | 136789061 | . | - | . | gene_id "XLOC_041915"; transcript_id "TCONS_00069535"; exon_number "2"; |
| oId "CUFF.73833.2"; tss_id "TSS52765"; |           |   |   |   |                                                                         |
| chr4 Cufflinks exon136809126           | 136809259 | . | - | . | gene_id "XLOC_041915"; transcript_id "TCONS_00069535"; exon_number "3"; |
| oId "CUFF.73833.2"; tss_id "TSS52765"; |           |   |   |   |                                                                         |
| chr4 Cufflinks exon145564068           | 145564886 | . | - | . | gene_id "XLOC_041962"; transcript_id "TCONS_00069620"; exon_number "1"; |
| oId "CUFF.74049.1"; tss_id "TSS52826"; |           |   |   |   |                                                                         |
| chr4 Cufflinks exon145566859           | 145567171 | . | - | . | gene_id "XLOC_041962"; transcript_id "TCONS_00069620"; exon_number "2"; |
| oId "CUFF.74049.1"; tss_id "TSS52826"; |           |   |   |   |                                                                         |
| chr4 Cufflinks exon145564068           | 145564886 | . | - | . | gene_id "XLOC_041962"; transcript_id "TCONS_00069621"; exon_number "1"; |
| oId "CUFF.74049.2"; tss_id "TSS52827"; |           |   |   |   |                                                                         |
| chr4 Cufflinks exon145568119           | 145568456 | . | - | . | gene_id "XLOC_041962"; transcript_id "TCONS_00069621"; exon_number "2"; |
| oId "CUFF.74049.2"; tss_id "TSS52827"; |           |   |   |   |                                                                         |
| chr4 Cufflinks exon145564068           | 145564886 | . | - | . | gene_id "XLOC_041962"; transcript_id "TCONS_00069623"; exon_number "1"; |
| oId "CUFF.74049.3"; tss_id "TSS52829"; |           |   |   |   |                                                                         |
| chr4 Cufflinks exon145619265           | 145619295 | . | - | . | gene_id "XLOC_041962"; transcript_id "TCONS_00069623"; exon_number "2"; |
| oId "CUFF.74049.3"; tss_id "TSS52829"; |           |   |   |   |                                                                         |
| chr4 Cufflinks exon152268738           | 152269486 | . | - | . | gene_id "XLOC_042001"; transcript_id "TCONS_00069693"; exon_number "1"; |
| oId "CUFF.74201.3"; tss_id "TSS52882"; |           |   |   |   |                                                                         |
| chr4 Cufflinks exon152274052           | 152274543 | . | - | . | gene_id "XLOC_042001"; transcript_id "TCONS_00069693"; exon_number "2"; |
| oId "CUFF.74201.3"; tss_id "TSS52882"; |           |   |   |   |                                                                         |
| chr4 Cufflinks exon152326675           | 152326760 | . | - | . | gene_id "XLOC_042001"; transcript_id "TCONS_00069693"; exon_number "3"; |
| oId "CUFF.74201.3"; tss_id "TSS52882"; |           |   |   |   |                                                                         |
| chr4 Cufflinks exon152327884           | 152330094 | . | - | . | gene_id "XLOC_042001"; transcript_id "TCONS_00069693"; exon_number "4"; |
| oId "CUFF.74201.3"; tss_id "TSS52882"; |           |   |   |   |                                                                         |
| chr4 Cufflinks exon152319009           | 152319898 | . | - | . | gene_id "XLOC_042001"; transcript_id "TCONS_00069694"; exon_number "1"; |
| oId "CUFF.74201.4"; tss_id "TSS52883"; |           |   |   |   |                                                                         |
| chr4 Cufflinks exon152326675           | 152326760 | . | - | . | gene_id "XLOC_042001"; transcript_id "TCONS_00069694"; exon_number "2"; |
| oId "CUFF.74201.4"; tss_id "TSS52883"; |           |   |   |   |                                                                         |
| chr4 Cufflinks exon152328335           | 152329692 | . | - | . | gene_id "XLOC_042001"; transcript_id "TCONS_00069694"; exon_number "3"; |
| oId "CUFF.74201.4"; tss_id "TSS52883"; |           |   |   |   |                                                                         |
| chr4 Cufflinks exon152322783           | 152323619 | . | - | . | gene_id "XLOC_042001"; transcript_id "TCONS_00069696"; exon_number "1"; |
| oId "CUFF.74201.9"; tss_id "TSS52882"; |           |   |   |   |                                                                         |
| chr4 Cufflinks exon152326675           | 152326760 | . | - | . | gene_id "XLOC_042001"; transcript_id "TCONS_00069696"; exon_number "2"; |

oId "CUFF.74201.9"; tss\_id "TSS52882";  
chr4 Cufflinks exon152328641 152330146 . - . gene\_id "XLOC\_042001"; transcript\_id "TCONS\_00069696"; exon\_number "3";  
oId "CUFF.74201.9"; tss\_id "TSS52882";  
chr4 Cufflinks exon152322783 152323502 . - . gene\_id "XLOC\_042001"; transcript\_id "TCONS\_00069695"; exon\_number "1";  
oId "CUFF.74201.8"; tss\_id "TSS52882";  
chr4 Cufflinks exon152326676 152326760 . - . gene\_id "XLOC\_042001"; transcript\_id "TCONS\_00069695"; exon\_number "2";  
oId "CUFF.74201.8"; tss\_id "TSS52882";  
chr4 Cufflinks exon152328335 152330146 . - . gene\_id "XLOC\_042001"; transcript\_id "TCONS\_00069695"; exon\_number "3";  
oId "CUFF.74201.8"; tss\_id "TSS52882";  
chr4 Cufflinks exon153235720 153236881 . - . gene\_id "XLOC\_042026"; transcript\_id "TCONS\_00069721"; exon\_number "1";  
oId "CUFF.74256.1"; tss\_id "TSS52908";  
chr4 Cufflinks exon153238114 153238343 . - . gene\_id "XLOC\_042026"; transcript\_id "TCONS\_00069721"; exon\_number "2";  
oId "CUFF.74256.1"; tss\_id "TSS52908";  
chr4 Cufflinks exon153855715 153856602 . - . gene\_id "XLOC\_042040"; transcript\_id "TCONS\_00069746"; exon\_number "1";  
oId "CUFF.74285.1"; tss\_id "TSS52929";  
chr4 Cufflinks exon153857801 153858369 . - . gene\_id "XLOC\_042040"; transcript\_id "TCONS\_00069746"; exon\_number "2";  
oId "CUFF.74285.1"; tss\_id "TSS52929";  
chr4 Cufflinks exon154303407 154303653 . - . gene\_id "XLOC\_042045"; transcript\_id "TCONS\_00069754"; exon\_number "1";  
oId "CUFF.74303.3"; tss\_id "TSS52935";  
chr4 Cufflinks exon154304677 154307477 . - . gene\_id "XLOC\_042045"; transcript\_id "TCONS\_00069754"; exon\_number "2";  
oId "CUFF.74303.3"; tss\_id "TSS52935";  
chr4 Cufflinks exon154308652 154308743 . - . gene\_id "XLOC\_042045"; transcript\_id "TCONS\_00069754"; exon\_number "3";  
oId "CUFF.74303.3"; tss\_id "TSS52935";  
chr4 Cufflinks exon154337535 154337686 . - . gene\_id "XLOC\_042045"; transcript\_id "TCONS\_00069754"; exon\_number "4";  
oId "CUFF.74303.3"; tss\_id "TSS52935";  
chr4 Cufflinks exon154338614 154338733 . - . gene\_id "XLOC\_042045"; transcript\_id "TCONS\_00069754"; exon\_number "5";  
oId "CUFF.74303.3"; tss\_id "TSS52935";  
chr4 Cufflinks exon154351012 154351336 . - . gene\_id "XLOC\_042045"; transcript\_id "TCONS\_00069754"; exon\_number "6";  
oId "CUFF.74303.3"; tss\_id "TSS52935";  
chr4 Cufflinks exon154360638 154360737 . - . gene\_id "XLOC\_042045"; transcript\_id "TCONS\_00069754"; exon\_number "7";  
oId "CUFF.74303.3"; tss\_id "TSS52935";  
chr4 Cufflinks exon154303407 154303653 . - . gene\_id "XLOC\_042045"; transcript\_id "TCONS\_00069753"; exon\_number "1";  
oId "CUFF.74303.2"; tss\_id "TSS52935";  
chr4 Cufflinks exon154304677 154307475 . - . gene\_id "XLOC\_042045"; transcript\_id "TCONS\_00069753"; exon\_number "2";  
oId "CUFF.74303.2"; tss\_id "TSS52935";  
chr4 Cufflinks exon154308652 154308743 . - . gene\_id "XLOC\_042045"; transcript\_id "TCONS\_00069753"; exon\_number "3";  
oId "CUFF.74303.2"; tss\_id "TSS52935";  
chr4 Cufflinks exon154337535 154337683 . - . gene\_id "XLOC\_042045"; transcript\_id "TCONS\_00069753"; exon\_number "4";  
oId "CUFF.74303.2"; tss\_id "TSS52935";  
chr4 Cufflinks exon154360638 154360737 . - . gene\_id "XLOC\_042045"; transcript\_id "TCONS\_00069753"; exon\_number "5";  
oId "CUFF.74303.2"; tss\_id "TSS52935";  
chr4 Cufflinks exon164025015 164025468 . - . gene\_id "XLOC\_042073"; transcript\_id "TCONS\_00069798"; exon\_number "1";  
oId "CUFF.74399.3"; tss\_id "TSS52968";

|                                        |           |   |   |   |                                                                         |
|----------------------------------------|-----------|---|---|---|-------------------------------------------------------------------------|
| chr4 Cufflinks exon164029708           | 164030460 | . | - | . | gene_id "XLOC_042073"; transcript_id "TCONS_00069798"; exon_number "2"; |
| oId "CUFF.74399.3"; tss_id "TSS52968"; |           |   |   |   |                                                                         |
| chr4 Cufflinks exon175035114           | 175035423 | . | - | . | gene_id "XLOC_042134"; transcript_id "TCONS_00069891"; exon_number "1"; |
| oId "CUFF.74638.2"; tss_id "TSS53043"; |           |   |   |   |                                                                         |
| chr4 Cufflinks exon175035925           | 175035966 | . | - | . | gene_id "XLOC_042134"; transcript_id "TCONS_00069891"; exon_number "2"; |
| oId "CUFF.74638.2"; tss_id "TSS53043"; |           |   |   |   |                                                                         |
| chr4 Cufflinks exon175036685           | 175038031 | . | - | . | gene_id "XLOC_042134"; transcript_id "TCONS_00069891"; exon_number "3"; |
| oId "CUFF.74638.2"; tss_id "TSS53043"; |           |   |   |   |                                                                         |
| chr4 Cufflinks exon175035114           | 175036784 | . | - | . | gene_id "XLOC_042134"; transcript_id "TCONS_00069892"; exon_number "1"; |
| oId "CUFF.74638.3"; tss_id "TSS53044"; |           |   |   |   |                                                                         |
| chr4 Cufflinks exon175041048           | 175041668 | . | - | . | gene_id "XLOC_042134"; transcript_id "TCONS_00069892"; exon_number "2"; |
| oId "CUFF.74638.3"; tss_id "TSS53044"; |           |   |   |   |                                                                         |
| chr4 Cufflinks exon175035114           | 175036307 | . | - | . | gene_id "XLOC_042134"; transcript_id "TCONS_00069893"; exon_number "1"; |
| oId "CUFF.74638.4"; tss_id "TSS53045"; |           |   |   |   |                                                                         |
| chr4 Cufflinks exon175041047           | 175041237 | . | - | . | gene_id "XLOC_042134"; transcript_id "TCONS_00069893"; exon_number "2"; |
| oId "CUFF.74638.4"; tss_id "TSS53045"; |           |   |   |   |                                                                         |
| chr4 Cufflinks exon175141465           | 175141549 | . | - | . | gene_id "XLOC_042134"; transcript_id "TCONS_00069893"; exon_number "3"; |
| oId "CUFF.74638.4"; tss_id "TSS53045"; |           |   |   |   |                                                                         |
| chr4 Cufflinks exon183792184           | 183795375 | . | - | . | gene_id "XLOC_042219"; transcript_id "TCONS_00069996"; exon_number "1"; |
| oId "CUFF.74870.1"; tss_id "TSS53137"; |           |   |   |   |                                                                         |
| chr4 Cufflinks exon183795723           | 183795822 | . | - | . | gene_id "XLOC_042219"; transcript_id "TCONS_00069996"; exon_number "2"; |
| oId "CUFF.74870.1"; tss_id "TSS53137"; |           |   |   |   |                                                                         |
| chr4 Cufflinks exon183798921           | 183809015 | . | - | . | gene_id "XLOC_042221"; transcript_id "TCONS_00069999"; exon_number "1"; |
| oId "CUFF.74871.2"; tss_id "TSS53140"; |           |   |   |   |                                                                         |
| chr4 Cufflinks exon183999256           | 183999301 | . | - | . | gene_id "XLOC_042221"; transcript_id "TCONS_00069999"; exon_number "2"; |
| oId "CUFF.74871.2"; tss_id "TSS53140"; |           |   |   |   |                                                                         |
| chr4 Cufflinks exon185267567           | 185269132 | . | - | . | gene_id "XLOC_042237"; transcript_id "TCONS_00070019"; exon_number "1"; |
| oId "CUFF.74933.6"; tss_id "TSS53157"; |           |   |   |   |                                                                         |
| chr4 Cufflinks exon185269244           | 185269345 | . | - | . | gene_id "XLOC_042237"; transcript_id "TCONS_00070019"; exon_number "2"; |
| oId "CUFF.74933.6"; tss_id "TSS53157"; |           |   |   |   |                                                                         |
| chr4 Cufflinks exon185270452           | 185271144 | . | - | . | gene_id "XLOC_042237"; transcript_id "TCONS_00070019"; exon_number "3"; |
| oId "CUFF.74933.6"; tss_id "TSS53157"; |           |   |   |   |                                                                         |
| chr4 Cufflinks exon185271242           | 185271431 | . | - | . | gene_id "XLOC_042237"; transcript_id "TCONS_00070019"; exon_number "4"; |
| oId "CUFF.74933.6"; tss_id "TSS53157"; |           |   |   |   |                                                                         |
| chr4 Cufflinks exon185274466           | 185275300 | . | - | . | gene_id "XLOC_042237"; transcript_id "TCONS_00070019"; exon_number "5"; |
| oId "CUFF.74933.6"; tss_id "TSS53157"; |           |   |   |   |                                                                         |
| chr4 Cufflinks exon186069139           | 186073103 | . | - | . | gene_id "XLOC_042252"; transcript_id "TCONS_00070046"; exon_number "1"; |
| oId "CUFF.74987.1"; tss_id "TSS53178"; |           |   |   |   |                                                                         |
| chr4 Cufflinks exon186348141           | 186348160 | . | - | . | gene_id "XLOC_042252"; transcript_id "TCONS_00070046"; exon_number "2"; |
| oId "CUFF.74987.1"; tss_id "TSS53178"; |           |   |   |   |                                                                         |
| chr4 Cufflinks exon188224987           | 188225621 | . | - | . | gene_id "XLOC_042276"; transcript_id "TCONS_00070090"; exon_number "1"; |
| oId "CUFF.75046.4"; tss_id "TSS53214"; |           |   |   |   |                                                                         |
| chr4 Cufflinks exon188225792           | 188226855 | . | - | . | gene_id "XLOC_042276"; transcript_id "TCONS_00070090"; exon_number "2"; |

oId "CUFF.75046.4"; tss\_id "TSS53214";  
chr4 Cufflinks exon188228260 188228423 . - . gene\_id "XLOC\_042276"; transcript\_id "TCONS\_00070090"; exon\_number "3";  
oId "CUFF.75046.4"; tss\_id "TSS53214";  
chr4 Cufflinks exon188230336 188230832 . - . gene\_id "XLOC\_042276"; transcript\_id "TCONS\_00070090"; exon\_number "4";  
oId "CUFF.75046.4"; tss\_id "TSS53214";  
chr4 Cufflinks exon188426446 188426767 . - . gene\_id "XLOC\_042276"; transcript\_id "TCONS\_00070090"; exon\_number "5";  
oId "CUFF.75046.4"; tss\_id "TSS53214";  
chr4 Cufflinks exon188294447 188296781 . - . gene\_id "XLOC\_042276"; transcript\_id "TCONS\_00070093"; exon\_number "1";  
oId "CUFF.75046.6"; tss\_id "TSS53215";  
chr4 Cufflinks exon188298235 188298319 . - . gene\_id "XLOC\_042276"; transcript\_id "TCONS\_00070093"; exon\_number "2";  
oId "CUFF.75046.6"; tss\_id "TSS53215";  
chr4 Cufflinks exon188335892 188336009 . - . gene\_id "XLOC\_042276"; transcript\_id "TCONS\_00070093"; exon\_number "3";  
oId "CUFF.75046.6"; tss\_id "TSS53215";  
chr4 Cufflinks exon188426446 188426915 . - . gene\_id "XLOC\_042276"; transcript\_id "TCONS\_00070093"; exon\_number "4";  
oId "CUFF.75046.6"; tss\_id "TSS53215";  
chr4 Cufflinks exon188294447 188296781 . - . gene\_id "XLOC\_042276"; transcript\_id "TCONS\_00070092"; exon\_number "1";  
oId "CUFF.75046.5"; tss\_id "TSS53215";  
chr4 Cufflinks exon188298235 188298319 . - . gene\_id "XLOC\_042276"; transcript\_id "TCONS\_00070092"; exon\_number "2";  
oId "CUFF.75046.5"; tss\_id "TSS53215";  
chr4 Cufflinks exon188426446 188426915 . - . gene\_id "XLOC\_042276"; transcript\_id "TCONS\_00070092"; exon\_number "3";  
oId "CUFF.75046.5"; tss\_id "TSS53215";  
chr4 Cufflinks exon189660454 189661867 . - . gene\_id "XLOC\_042280"; transcript\_id "TCONS\_00070096"; exon\_number "1";  
oId "CUFF.75074.1"; tss\_id "TSS53219";  
chr4 Cufflinks exon189662522 189662628 . - . gene\_id "XLOC\_042280"; transcript\_id "TCONS\_00070096"; exon\_number "2";  
oId "CUFF.75074.1"; tss\_id "TSS53219";  
chr4 Cufflinks exon190598880 190599265 . - . gene\_id "XLOC\_042285"; transcript\_id "TCONS\_00070101"; exon\_number "1";  
oId "CUFF.75088.2"; tss\_id "TSS53224";  
chr4 Cufflinks exon190637389 190637522 . - . gene\_id "XLOC\_042285"; transcript\_id "TCONS\_00070101"; exon\_number "2";  
oId "CUFF.75088.2"; tss\_id "TSS53224";  
chr4 Cufflinks exon190639305 190639412 . - . gene\_id "XLOC\_042285"; transcript\_id "TCONS\_00070101"; exon\_number "3";  
oId "CUFF.75088.2"; tss\_id "TSS53224";  
chr4 Cufflinks exon190643331 190643447 . - . gene\_id "XLOC\_042285"; transcript\_id "TCONS\_00070101"; exon\_number "4";  
oId "CUFF.75088.2"; tss\_id "TSS53224";  
chr4 Cufflinks exon190685321 190686901 . - . gene\_id "XLOC\_042293"; transcript\_id "TCONS\_00070110"; exon\_number "1";  
oId "CUFF.75097.1"; tss\_id "TSS53233";  
chr4 Cufflinks exon190690411 190690587 . - . gene\_id "XLOC\_042293"; transcript\_id "TCONS\_00070110"; exon\_number "2";  
oId "CUFF.75097.1"; tss\_id "TSS53233";  
chr4 Cufflinks exon190693207 190693306 . - . gene\_id "XLOC\_042293"; transcript\_id "TCONS\_00070110"; exon\_number "3";  
oId "CUFF.75097.1"; tss\_id "TSS53233";  
chr4 Cufflinks exon190685321 190686901 . - . gene\_id "XLOC\_042293"; transcript\_id "TCONS\_00070111"; exon\_number "1";  
oId "CUFF.75097.2"; tss\_id "TSS53234";  
chr4 Cufflinks exon190693207 190693467 . - . gene\_id "XLOC\_042293"; transcript\_id "TCONS\_00070111"; exon\_number "2";  
oId "CUFF.75097.2"; tss\_id "TSS53234";

chr4 Cufflinks exon190685321 190686904 . - . gene\_id "XLOC\_042293"; transcript\_id "TCONS\_00070112"; exon\_number "1";  
oId "CUFF.75097.3"; tss\_id "TSS53235";

chr4 Cufflinks exon190785748 190785941 . - . gene\_id "XLOC\_042293"; transcript\_id "TCONS\_00070112"; exon\_number "2";  
oId "CUFF.75097.3"; tss\_id "TSS53235";

chr4 Cufflinks exon190858352 190858488 . - . gene\_id "XLOC\_042293"; transcript\_id "TCONS\_00070112"; exon\_number "3";  
oId "CUFF.75097.3"; tss\_id "TSS53235";

chr4 Cufflinks exon190861205 190861817 . - . gene\_id "XLOC\_042293"; transcript\_id "TCONS\_00070112"; exon\_number "4";  
oId "CUFF.75097.3"; tss\_id "TSS53235";

chr4 Cufflinks exon190858142 190858488 . - . gene\_id "XLOC\_042293"; transcript\_id "TCONS\_00070124"; exon\_number "1";  
oId "CUFF.75097.5"; tss\_id "TSS53237";

chr4 Cufflinks exon190861205 190861924 . - . gene\_id "XLOC\_042293"; transcript\_id "TCONS\_00070124"; exon\_number "2";  
oId "CUFF.75097.5"; tss\_id "TSS53237";

chr4 Cufflinks exon190700445 190701921 . - . gene\_id "XLOC\_042296"; transcript\_id "TCONS\_00070116"; exon\_number "1";  
oId "CUFF.75100.1"; tss\_id "TSS53241";

chr4 Cufflinks exon190705710 190708933 . - . gene\_id "XLOC\_042296"; transcript\_id "TCONS\_00070116"; exon\_number "2";  
oId "CUFF.75100.1"; tss\_id "TSS53241";

chr5 Cufflinks exon964368 964598 . + . gene\_id "XLOC\_042354"; transcript\_id "TCONS\_00070206"; exon\_number "1"; oId  
"CUFF.75217.5"; tss\_id "TSS53305";

chr5 Cufflinks exon966808 966904 . + . gene\_id "XLOC\_042354"; transcript\_id "TCONS\_00070206"; exon\_number "2"; oId  
"CUFF.75217.5"; tss\_id "TSS53305";

chr5 Cufflinks exon978233 981304 . + . gene\_id "XLOC\_042354"; transcript\_id "TCONS\_00070206"; exon\_number "3"; oId  
"CUFF.75217.5"; tss\_id "TSS53305";

chr5 Cufflinks exon1345236 1347567 . + . gene\_id "XLOC\_042365"; transcript\_id "TCONS\_00070223"; exon\_number "1"; oId  
"CUFF.75254.1"; tss\_id "TSS53320";

chr5 Cufflinks exon1349856 1352309 . + . gene\_id "XLOC\_042365"; transcript\_id "TCONS\_00070223"; exon\_number "2"; oId  
"CUFF.75254.1"; tss\_id "TSS53320";

chr5 Cufflinks exon1869046 1869292 . + . gene\_id "XLOC\_042378"; transcript\_id "TCONS\_00070239"; exon\_number "1"; oId  
"CUFF.75301.2"; tss\_id "TSS53334";

chr5 Cufflinks exon1872264 1872334 . + . gene\_id "XLOC\_042378"; transcript\_id "TCONS\_00070239"; exon\_number "2"; oId  
"CUFF.75301.2"; tss\_id "TSS53334";

chr5 Cufflinks exon1869046 1869292 . + . gene\_id "XLOC\_042378"; transcript\_id "TCONS\_00070240"; exon\_number "1"; oId  
"CUFF.75301.3"; tss\_id "TSS53334";

chr5 Cufflinks exon1884594 1884755 . + . gene\_id "XLOC\_042378"; transcript\_id "TCONS\_00070240"; exon\_number "2"; oId  
"CUFF.75301.3"; tss\_id "TSS53334";

chr5 Cufflinks exon2068850 2069085 . + . gene\_id "XLOC\_042395"; transcript\_id "TCONS\_00070264"; exon\_number "1"; oId  
"CUFF.75329.1"; tss\_id "TSS53355";

chr5 Cufflinks exon2069258 2069684 . + . gene\_id "XLOC\_042395"; transcript\_id "TCONS\_00070264"; exon\_number "2"; oId  
"CUFF.75329.1"; tss\_id "TSS53355";

chr5 Cufflinks exon2068889 2069085 . + . gene\_id "XLOC\_042395"; transcript\_id "TCONS\_00070265"; exon\_number "1"; oId  
"CUFF.75329.2"; tss\_id "TSS53355";

chr5 Cufflinks exon2069258 2069457 . + . gene\_id "XLOC\_042395"; transcript\_id "TCONS\_00070265"; exon\_number "2"; oId  
"CUFF.75329.2"; tss\_id "TSS53355";

chr5 Cufflinks exon2071713 2071766 . + . gene\_id "XLOC\_042395"; transcript\_id "TCONS\_00070265"; exon\_number "3"; oId

"CUFF.75329.2"; tss\_id "TSS53355";  
chr5 Cufflinks exon2094177 2095448 . + . gene\_id "XLOC\_042395"; transcript\_id "TCONS\_00070265"; exon\_number "4"; oId  
"CUFF.75329.2"; tss\_id "TSS53355";  
chr5 Cufflinks exon2776805 2777381 . + . gene\_id "XLOC\_042403"; transcript\_id "TCONS\_00070274"; exon\_number "1"; oId  
"CUFF.75344.2"; tss\_id "TSS53363";  
chr5 Cufflinks exon2778026 2781827 . + . gene\_id "XLOC\_042403"; transcript\_id "TCONS\_00070274"; exon\_number "2"; oId  
"CUFF.75344.2"; tss\_id "TSS53363";  
chr5 Cufflinks exon4076853 4076989 . + . gene\_id "XLOC\_042423"; transcript\_id "TCONS\_00070294"; exon\_number "1"; oId  
"CUFF.75378.1"; tss\_id "TSS53383";  
chr5 Cufflinks exon4082963 4083127 . + . gene\_id "XLOC\_042423"; transcript\_id "TCONS\_00070294"; exon\_number "2"; oId  
"CUFF.75378.1"; tss\_id "TSS53383";  
chr5 Cufflinks exon4087716 4088160 . + . gene\_id "XLOC\_042423"; transcript\_id "TCONS\_00070294"; exon\_number "3"; oId  
"CUFF.75378.1"; tss\_id "TSS53383";  
chr5 Cufflinks exon4526828 4527017 . + . gene\_id "XLOC\_042425"; transcript\_id "TCONS\_00070297"; exon\_number "1"; oId  
"CUFF.75448.1"; tss\_id "TSS53385";  
chr5 Cufflinks exon4528366 4529283 . + . gene\_id "XLOC\_042425"; transcript\_id "TCONS\_00070297"; exon\_number "2"; oId  
"CUFF.75448.1"; tss\_id "TSS53385";  
chr5 Cufflinks exon4531241 4543060 . + . gene\_id "XLOC\_042425"; transcript\_id "TCONS\_00070297"; exon\_number "3"; oId  
"CUFF.75448.1"; tss\_id "TSS53385";  
chr5 Cufflinks exon5348357 5348490 . + . gene\_id "XLOC\_042435"; transcript\_id "TCONS\_00070310"; exon\_number "1"; oId  
"CUFF.75477.1"; tss\_id "TSS53397";  
chr5 Cufflinks exon5349304 5350942 . + . gene\_id "XLOC\_042435"; transcript\_id "TCONS\_00070310"; exon\_number "2"; oId  
"CUFF.75477.1"; tss\_id "TSS53397";  
chr5 Cufflinks exon6766022 6766094 . + . gene\_id "XLOC\_042458"; transcript\_id "TCONS\_00070340"; exon\_number "1"; oId  
"CUFF.75546.2"; tss\_id "TSS53423";  
chr5 Cufflinks exon6775672 6776142 . + . gene\_id "XLOC\_042458"; transcript\_id "TCONS\_00070340"; exon\_number "2"; oId  
"CUFF.75546.2"; tss\_id "TSS53423";  
chr5 Cufflinks exon6777163 6777271 . + . gene\_id "XLOC\_042458"; transcript\_id "TCONS\_00070340"; exon\_number "3"; oId  
"CUFF.75546.2"; tss\_id "TSS53423";  
chr5 Cufflinks exon6777447 6777622 . + . gene\_id "XLOC\_042458"; transcript\_id "TCONS\_00070340"; exon\_number "4"; oId  
"CUFF.75546.2"; tss\_id "TSS53423";  
chr5 Cufflinks exon6778862 6779309 . + . gene\_id "XLOC\_042458"; transcript\_id "TCONS\_00070340"; exon\_number "5"; oId  
"CUFF.75546.2"; tss\_id "TSS53423";  
chr5 Cufflinks exon6766022 6766094 . + . gene\_id "XLOC\_042458"; transcript\_id "TCONS\_00070341"; exon\_number "1"; oId  
"CUFF.75546.1"; tss\_id "TSS53423";  
chr5 Cufflinks exon6775672 6776142 . + . gene\_id "XLOC\_042458"; transcript\_id "TCONS\_00070341"; exon\_number "2"; oId  
"CUFF.75546.1"; tss\_id "TSS53423";  
chr5 Cufflinks exon6777163 6777271 . + . gene\_id "XLOC\_042458"; transcript\_id "TCONS\_00070341"; exon\_number "3"; oId  
"CUFF.75546.1"; tss\_id "TSS53423";  
chr5 Cufflinks exon6777447 6777622 . + . gene\_id "XLOC\_042458"; transcript\_id "TCONS\_00070341"; exon\_number "4"; oId  
"CUFF.75546.1"; tss\_id "TSS53423";  
chr5 Cufflinks exon6786219 6787006 . + . gene\_id "XLOC\_042458"; transcript\_id "TCONS\_00070341"; exon\_number "5"; oId  
"CUFF.75546.1"; tss\_id "TSS53423";

chr5 Cufflinks exon6766051 6766094 . + . gene\_id "XLOC\_042458"; transcript\_id "TCONS\_00070342"; exon\_number "1"; oId "CUFF.75546.3"; tss\_id "TSS53423";

chr5 Cufflinks exon6771712 6772678 . + . gene\_id "XLOC\_042458"; transcript\_id "TCONS\_00070342"; exon\_number "2"; oId "CUFF.75546.3"; tss\_id "TSS53423";

chr5 Cufflinks exon8457800 8457879 . + . gene\_id "XLOC\_042471"; transcript\_id "TCONS\_00070358"; exon\_number "1"; oId "CUFF.75579.1"; tss\_id "TSS53436";

chr5 Cufflinks exon8460046 8463209 . + . gene\_id "XLOC\_042471"; transcript\_id "TCONS\_00070358"; exon\_number "2"; oId "CUFF.75579.1"; tss\_id "TSS53436";

chr5 Cufflinks exon27472398 27472626 . + . gene\_id "XLOC\_042527"; transcript\_id "TCONS\_00070446"; exon\_number "1"; oId "CUFF.75783.2"; tss\_id "TSS53504";

chr5 Cufflinks exon27475642 27475802 . + . gene\_id "XLOC\_042527"; transcript\_id "TCONS\_00070446"; exon\_number "2"; oId "CUFF.75783.2"; tss\_id "TSS53504";

chr5 Cufflinks exon27476176 27477908 . + . gene\_id "XLOC\_042527"; transcript\_id "TCONS\_00070446"; exon\_number "3"; oId "CUFF.75783.2"; tss\_id "TSS53504";

chr5 Cufflinks exon27485033 27494442 . + . gene\_id "XLOC\_042527"; transcript\_id "TCONS\_00070446"; exon\_number "4"; oId "CUFF.75783.2"; tss\_id "TSS53504";

chr5 Cufflinks exon27496056 27496508 . + . gene\_id "XLOC\_042527"; transcript\_id "TCONS\_00070446"; exon\_number "5"; oId "CUFF.75783.2"; tss\_id "TSS53504";

chr5 Cufflinks exon27472398 27472626 . + . gene\_id "XLOC\_042527"; transcript\_id "TCONS\_00070445"; exon\_number "1"; oId "CUFF.75783.1"; tss\_id "TSS53504";

chr5 Cufflinks exon27475642 27475802 . + . gene\_id "XLOC\_042527"; transcript\_id "TCONS\_00070445"; exon\_number "2"; oId "CUFF.75783.1"; tss\_id "TSS53504";

chr5 Cufflinks exon27476194 27476265 . + . gene\_id "XLOC\_042527"; transcript\_id "TCONS\_00070445"; exon\_number "3"; oId "CUFF.75783.1"; tss\_id "TSS53504";

chr5 Cufflinks exon27477746 27477908 . + . gene\_id "XLOC\_042527"; transcript\_id "TCONS\_00070445"; exon\_number "4"; oId "CUFF.75783.1"; tss\_id "TSS53504";

chr5 Cufflinks exon27485033 27494442 . + . gene\_id "XLOC\_042527"; transcript\_id "TCONS\_00070445"; exon\_number "5"; oId "CUFF.75783.1"; tss\_id "TSS53504";

chr5 Cufflinks exon27496056 27496508 . + . gene\_id "XLOC\_042527"; transcript\_id "TCONS\_00070445"; exon\_number "6"; oId "CUFF.75783.1"; tss\_id "TSS53504";

chr5 Cufflinks exon27484747 27489493 . + . gene\_id "XLOC\_042527"; transcript\_id "TCONS\_00070449"; exon\_number "1"; oId "CUFF.75783.6"; tss\_id "TSS53505";

chr5 Cufflinks exon27494342 27496508 . + . gene\_id "XLOC\_042527"; transcript\_id "TCONS\_00070449"; exon\_number "2"; oId "CUFF.75783.6"; tss\_id "TSS53505";

chr5 Cufflinks exon70149830 70149956 . + . gene\_id "XLOC\_042792"; transcript\_id "TCONS\_00070869"; exon\_number "1"; oId "CUFF.76959.1"; tss\_id "TSS53827";

chr5 Cufflinks exon70160938 70161023 . + . gene\_id "XLOC\_042792"; transcript\_id "TCONS\_00070869"; exon\_number "2"; oId "CUFF.76959.1"; tss\_id "TSS53827";

chr5 Cufflinks exon70163599 70164524 . + . gene\_id "XLOC\_042792"; transcript\_id "TCONS\_00070869"; exon\_number "3"; oId "CUFF.76959.1"; tss\_id "TSS53827";

chr5 Cufflinks exon70149858 70149956 . + . gene\_id "XLOC\_042792"; transcript\_id "TCONS\_00070870"; exon\_number "1"; oId "CUFF.76959.2"; tss\_id "TSS53827";

chr5 Cufflinks exon70163599 70164524 . + . gene\_id "XLOC\_042792"; transcript\_id "TCONS\_00070870"; exon\_number "2";

oId "CUFF.76959.2"; tss\_id "TSS53827";  
chr5 Cufflinks exon70160628 70161023 . + . gene\_id "XLOC\_042792"; transcript\_id "TCONS\_00070873"; exon\_number "1";  
oId "CUFF.76959.3"; tss\_id "TSS53828";  
chr5 Cufflinks exon70163599 70164524 . + . gene\_id "XLOC\_042792"; transcript\_id "TCONS\_00070873"; exon\_number "2";  
oId "CUFF.76959.3"; tss\_id "TSS53828";  
chr5 Cufflinks exon76382623 76382729 . + . gene\_id "XLOC\_042863"; transcript\_id "TCONS\_00070984"; exon\_number "1";  
oId "CUFF.77205.1"; tss\_id "TSS53913";  
chr5 Cufflinks exon76383312 76383444 . + . gene\_id "XLOC\_042863"; transcript\_id "TCONS\_00070984"; exon\_number "2";  
oId "CUFF.77205.1"; tss\_id "TSS53913";  
chr5 Cufflinks exon76414145 76414346 . + . gene\_id "XLOC\_042863"; transcript\_id "TCONS\_00070984"; exon\_number "3";  
oId "CUFF.77205.1"; tss\_id "TSS53913";  
chr5 Cufflinks exon76443477 76444176 . + . gene\_id "XLOC\_042863"; transcript\_id "TCONS\_00070984"; exon\_number "4";  
oId "CUFF.77205.1"; tss\_id "TSS53913";  
chr5 Cufflinks exon80186062 80189211 . + . gene\_id "XLOC\_042908"; transcript\_id "TCONS\_00071050"; exon\_number "1";  
oId "CUFF.77381.1"; tss\_id "TSS53968";  
chr5 Cufflinks exon80272485 80273116 . + . gene\_id "XLOC\_042908"; transcript\_id "TCONS\_00071050"; exon\_number "2";  
oId "CUFF.77381.1"; tss\_id "TSS53968";  
chr5 Cufflinks exon81653390 81653770 . + . gene\_id "XLOC\_042941"; transcript\_id "TCONS\_00071094"; exon\_number "1";  
oId "CUFF.77475.2"; tss\_id "TSS54006";  
chr5 Cufflinks exon81654291 81655158 . + . gene\_id "XLOC\_042941"; transcript\_id "TCONS\_00071094"; exon\_number "2";  
oId "CUFF.77475.2"; tss\_id "TSS54006";  
chr5 Cufflinks exon81680215 81680282 . + . gene\_id "XLOC\_042954"; transcript\_id "TCONS\_00071107"; exon\_number "1";  
oId "CUFF.77494.1"; tss\_id "TSS54019";  
chr5 Cufflinks exon81681344 81682289 . + . gene\_id "XLOC\_042954"; transcript\_id "TCONS\_00071107"; exon\_number "2";  
oId "CUFF.77494.1"; tss\_id "TSS54019";  
chr5 Cufflinks exon86096156 86096321 . + . gene\_id "XLOC\_043075"; transcript\_id "TCONS\_00071233"; exon\_number "1";  
oId "CUFF.77752.1"; tss\_id "TSS54142";  
chr5 Cufflinks exon86109466 86109542 . + . gene\_id "XLOC\_043075"; transcript\_id "TCONS\_00071233"; exon\_number "2";  
oId "CUFF.77752.1"; tss\_id "TSS54142";  
chr5 Cufflinks exon86180055 86181702 . + . gene\_id "XLOC\_043075"; transcript\_id "TCONS\_00071233"; exon\_number "3";  
oId "CUFF.77752.1"; tss\_id "TSS54142";  
chr5 Cufflinks exon87564699 87564844 . + . gene\_id "XLOC\_043082"; transcript\_id "TCONS\_00071241"; exon\_number "1";  
oId "CUFF.77791.3"; tss\_id "TSS54150";  
chr5 Cufflinks exon87566343 87566402 . + . gene\_id "XLOC\_043082"; transcript\_id "TCONS\_00071241"; exon\_number "2";  
oId "CUFF.77791.3"; tss\_id "TSS54150";  
chr5 Cufflinks exon87732090 87732491 . + . gene\_id "XLOC\_043082"; transcript\_id "TCONS\_00071241"; exon\_number "3";  
oId "CUFF.77791.3"; tss\_id "TSS54150";  
chr5 Cufflinks exon87564833 87564936 . + . gene\_id "XLOC\_043082"; transcript\_id "TCONS\_00071243"; exon\_number "1";  
oId "CUFF.77791.5"; tss\_id "TSS54151";  
chr5 Cufflinks exon87566343 87566402 . + . gene\_id "XLOC\_043082"; transcript\_id "TCONS\_00071243"; exon\_number "2";  
oId "CUFF.77791.5"; tss\_id "TSS54151";  
chr5 Cufflinks exon87577859 87577923 . + . gene\_id "XLOC\_043082"; transcript\_id "TCONS\_00071243"; exon\_number "3";  
oId "CUFF.77791.5"; tss\_id "TSS54151";



|                                        |          |   |   |   |                                                                         |
|----------------------------------------|----------|---|---|---|-------------------------------------------------------------------------|
| chr5 Cufflinks exon87583253            | 87583439 | . | + | . | gene_id "XLOC_043082"; transcript_id "TCONS_00071243"; exon_number "4"; |
| oId "CUFF.77791.5"; tss_id "TSS54151"; |          |   |   |   |                                                                         |
| chr5 Cufflinks exon87587201            | 87587293 | . | + | . | gene_id "XLOC_043082"; transcript_id "TCONS_00071243"; exon_number "5"; |
| oId "CUFF.77791.5"; tss_id "TSS54151"; |          |   |   |   |                                                                         |
| chr5 Cufflinks exon87588385            | 87588460 | . | + | . | gene_id "XLOC_043082"; transcript_id "TCONS_00071243"; exon_number "6"; |
| oId "CUFF.77791.5"; tss_id "TSS54151"; |          |   |   |   |                                                                         |
| chr5 Cufflinks exon87705890            | 87706011 | . | + | . | gene_id "XLOC_043082"; transcript_id "TCONS_00071243"; exon_number "7"; |
| oId "CUFF.77791.5"; tss_id "TSS54151"; |          |   |   |   |                                                                         |
| chr5 Cufflinks exon87732090            | 87732491 | . | + | . | gene_id "XLOC_043082"; transcript_id "TCONS_00071243"; exon_number "8"; |
| oId "CUFF.77791.5"; tss_id "TSS54151"; |          |   |   |   |                                                                         |
| chr5 Cufflinks exon87564833            | 87564936 | . | + | . | gene_id "XLOC_043082"; transcript_id "TCONS_00071242"; exon_number "1"; |
| oId "CUFF.77791.4"; tss_id "TSS54151"; |          |   |   |   |                                                                         |
| chr5 Cufflinks exon87566343            | 87566402 | . | + | . | gene_id "XLOC_043082"; transcript_id "TCONS_00071242"; exon_number "2"; |
| oId "CUFF.77791.4"; tss_id "TSS54151"; |          |   |   |   |                                                                         |
| chr5 Cufflinks exon87705890            | 87706011 | . | + | . | gene_id "XLOC_043082"; transcript_id "TCONS_00071242"; exon_number "3"; |
| oId "CUFF.77791.4"; tss_id "TSS54151"; |          |   |   |   |                                                                         |
| chr5 Cufflinks exon87732090            | 87732491 | . | + | . | gene_id "XLOC_043082"; transcript_id "TCONS_00071242"; exon_number "4"; |
| oId "CUFF.77791.4"; tss_id "TSS54151"; |          |   |   |   |                                                                         |
| chr5 Cufflinks exon90676164            | 90676741 | . | + | . | gene_id "XLOC_043092"; transcript_id "TCONS_00071259"; exon_number "1"; |
| oId "CUFF.77841.5"; tss_id "TSS54162"; |          |   |   |   |                                                                         |
| chr5 Cufflinks exon90714526            | 90714588 | . | + | . | gene_id "XLOC_043092"; transcript_id "TCONS_00071259"; exon_number "2"; |
| oId "CUFF.77841.5"; tss_id "TSS54162"; |          |   |   |   |                                                                         |
| chr5 Cufflinks exon90714672            | 90717222 | . | + | . | gene_id "XLOC_043092"; transcript_id "TCONS_00071259"; exon_number "3"; |
| oId "CUFF.77841.5"; tss_id "TSS54162"; |          |   |   |   |                                                                         |
| chr5 Cufflinks exon90676164            | 90676741 | . | + | . | gene_id "XLOC_043092"; transcript_id "TCONS_00071258"; exon_number "1"; |
| oId "CUFF.77841.2"; tss_id "TSS54162"; |          |   |   |   |                                                                         |
| chr5 Cufflinks exon90714526            | 90714588 | . | + | . | gene_id "XLOC_043092"; transcript_id "TCONS_00071258"; exon_number "2"; |
| oId "CUFF.77841.2"; tss_id "TSS54162"; |          |   |   |   |                                                                         |
| chr5 Cufflinks exon90716538            | 90717222 | . | + | . | gene_id "XLOC_043092"; transcript_id "TCONS_00071258"; exon_number "3"; |
| oId "CUFF.77841.2"; tss_id "TSS54162"; |          |   |   |   |                                                                         |
| chr5 Cufflinks exon90676164            | 90676741 | . | + | . | gene_id "XLOC_043092"; transcript_id "TCONS_00071257"; exon_number "1"; |
| oId "CUFF.77841.1"; tss_id "TSS54162"; |          |   |   |   |                                                                         |
| chr5 Cufflinks exon90714526            | 90716271 | . | + | . | gene_id "XLOC_043092"; transcript_id "TCONS_00071257"; exon_number "2"; |
| oId "CUFF.77841.1"; tss_id "TSS54162"; |          |   |   |   |                                                                         |
| chr5 Cufflinks exon90716538            | 90717222 | . | + | . | gene_id "XLOC_043092"; transcript_id "TCONS_00071257"; exon_number "3"; |
| oId "CUFF.77841.1"; tss_id "TSS54162"; |          |   |   |   |                                                                         |
| chr5 Cufflinks exon90676164            | 90676741 | . | + | . | gene_id "XLOC_043092"; transcript_id "TCONS_00071260"; exon_number "1"; |
| oId "CUFF.77841.3"; tss_id "TSS54162"; |          |   |   |   |                                                                         |
| chr5 Cufflinks exon90714526            | 90714588 | . | + | . | gene_id "XLOC_043092"; transcript_id "TCONS_00071260"; exon_number "2"; |
| oId "CUFF.77841.3"; tss_id "TSS54162"; |          |   |   |   |                                                                         |
| chr5 Cufflinks exon90718595            | 90718696 | . | + | . | gene_id "XLOC_043092"; transcript_id "TCONS_00071260"; exon_number "3"; |
| oId "CUFF.77841.3"; tss_id "TSS54162"; |          |   |   |   |                                                                         |
| chr5 Cufflinks exon90676164            | 90676741 | . | + | . | gene_id "XLOC_043092"; transcript_id "TCONS_00071261"; exon_number "1"; |

|                                        |   |   |   |                                                                         |  |
|----------------------------------------|---|---|---|-------------------------------------------------------------------------|--|
| oId "CUFF.77841.4"; tss_id "TSS54162"; |   |   |   |                                                                         |  |
| chr5 Cufflinks exon90714526 90714588   | . | + | . | gene_id "XLOC_043092"; transcript_id "TCONS_00071261"; exon_number "2"; |  |
| oId "CUFF.77841.4"; tss_id "TSS54162"; |   |   |   |                                                                         |  |
| chr5 Cufflinks exon90766655 90766712   | . | + | . | gene_id "XLOC_043092"; transcript_id "TCONS_00071261"; exon_number "3"; |  |
| oId "CUFF.77841.4"; tss_id "TSS54162"; |   |   |   |                                                                         |  |
| chr5 Cufflinks exon100239104 100241373 | . | + | . | gene_id "XLOC_043163"; transcript_id "TCONS_00071350"; exon_number "1"; |  |
| oId "CUFF.78087.3"; tss_id "TSS54238"; |   |   |   |                                                                         |  |
| chr5 Cufflinks exon100249920 100250902 | . | + | . | gene_id "XLOC_043163"; transcript_id "TCONS_00071350"; exon_number "2"; |  |
| oId "CUFF.78087.3"; tss_id "TSS54238"; |   |   |   |                                                                         |  |
| chr5 Cufflinks exon100239104 100241373 | . | + | . | gene_id "XLOC_043163"; transcript_id "TCONS_00071351"; exon_number "1"; |  |
| oId "CUFF.78087.2"; tss_id "TSS54238"; |   |   |   |                                                                         |  |
| chr5 Cufflinks exon100275670 100279728 | . | + | . | gene_id "XLOC_043163"; transcript_id "TCONS_00071351"; exon_number "2"; |  |
| oId "CUFF.78087.2"; tss_id "TSS54238"; |   |   |   |                                                                         |  |
| chr5 Cufflinks exon103415635 103415825 | . | + | . | gene_id "XLOC_043185"; transcript_id "TCONS_00071389"; exon_number "1"; |  |
| oId "CUFF.78157.4"; tss_id "TSS54266"; |   |   |   |                                                                         |  |
| chr5 Cufflinks exon103416609 103416742 | . | + | . | gene_id "XLOC_043185"; transcript_id "TCONS_00071389"; exon_number "2"; |  |
| oId "CUFF.78157.4"; tss_id "TSS54266"; |   |   |   |                                                                         |  |
| chr5 Cufflinks exon103417581 103417649 | . | + | . | gene_id "XLOC_043185"; transcript_id "TCONS_00071389"; exon_number "3"; |  |
| oId "CUFF.78157.4"; tss_id "TSS54266"; |   |   |   |                                                                         |  |
| chr5 Cufflinks exon103417774 103418225 | . | + | . | gene_id "XLOC_043185"; transcript_id "TCONS_00071389"; exon_number "4"; |  |
| oId "CUFF.78157.4"; tss_id "TSS54266"; |   |   |   |                                                                         |  |
| chr5 Cufflinks exon103415635 103415825 | . | + | . | gene_id "XLOC_043185"; transcript_id "TCONS_00071388"; exon_number "1"; |  |
| oId "CUFF.78157.3"; tss_id "TSS54266"; |   |   |   |                                                                         |  |
| chr5 Cufflinks exon103416609 103416742 | . | + | . | gene_id "XLOC_043185"; transcript_id "TCONS_00071388"; exon_number "2"; |  |
| oId "CUFF.78157.3"; tss_id "TSS54266"; |   |   |   |                                                                         |  |
| chr5 Cufflinks exon103417581 103417648 | . | + | . | gene_id "XLOC_043185"; transcript_id "TCONS_00071388"; exon_number "3"; |  |
| oId "CUFF.78157.3"; tss_id "TSS54266"; |   |   |   |                                                                         |  |
| chr5 Cufflinks exon103417773 103418225 | . | + | . | gene_id "XLOC_043185"; transcript_id "TCONS_00071388"; exon_number "4"; |  |
| oId "CUFF.78157.3"; tss_id "TSS54266"; |   |   |   |                                                                         |  |
| chr5 Cufflinks exon103415635 103415825 | . | + | . | gene_id "XLOC_043185"; transcript_id "TCONS_00071391"; exon_number "1"; |  |
| oId "CUFF.78157.6"; tss_id "TSS54266"; |   |   |   |                                                                         |  |
| chr5 Cufflinks exon103416607 103416742 | . | + | . | gene_id "XLOC_043185"; transcript_id "TCONS_00071391"; exon_number "2"; |  |
| oId "CUFF.78157.6"; tss_id "TSS54266"; |   |   |   |                                                                         |  |
| chr5 Cufflinks exon103417581 103417648 | . | + | . | gene_id "XLOC_043185"; transcript_id "TCONS_00071391"; exon_number "3"; |  |
| oId "CUFF.78157.6"; tss_id "TSS54266"; |   |   |   |                                                                         |  |
| chr5 Cufflinks exon103439875 103439988 | . | + | . | gene_id "XLOC_043185"; transcript_id "TCONS_00071391"; exon_number "4"; |  |
| oId "CUFF.78157.6"; tss_id "TSS54266"; |   |   |   |                                                                         |  |
| chr5 Cufflinks exon103722764 103722876 | . | + | . | gene_id "XLOC_043185"; transcript_id "TCONS_00071391"; exon_number "5"; |  |
| oId "CUFF.78157.6"; tss_id "TSS54266"; |   |   |   |                                                                         |  |
| chr5 Cufflinks exon103724640 103725324 | . | + | . | gene_id "XLOC_043185"; transcript_id "TCONS_00071391"; exon_number "6"; |  |
| oId "CUFF.78157.6"; tss_id "TSS54266"; |   |   |   |                                                                         |  |
| chr5 Cufflinks exon103415635 103415825 | . | + | . | gene_id "XLOC_043185"; transcript_id "TCONS_00071390"; exon_number "1"; |  |
| oId "CUFF.78157.2"; tss_id "TSS54266"; |   |   |   |                                                                         |  |

|                                         |           |   |   |   |                                                                         |
|-----------------------------------------|-----------|---|---|---|-------------------------------------------------------------------------|
| chr5 Cufflinks exon103416609            | 103416742 | . | + | . | gene_id "XLOC_043185"; transcript_id "TCONS_00071390"; exon_number "2"; |
| oId "CUFF.78157.2"; tss_id "TSS54266";  |           |   |   |   |                                                                         |
| chr5 Cufflinks exon103417581            | 103417650 | . | + | . | gene_id "XLOC_043185"; transcript_id "TCONS_00071390"; exon_number "3"; |
| oId "CUFF.78157.2"; tss_id "TSS54266";  |           |   |   |   |                                                                         |
| chr5 Cufflinks exon103439875            | 103439988 | . | + | . | gene_id "XLOC_043185"; transcript_id "TCONS_00071390"; exon_number "4"; |
| oId "CUFF.78157.2"; tss_id "TSS54266";  |           |   |   |   |                                                                         |
| chr5 Cufflinks exon103722764            | 103722876 | . | + | . | gene_id "XLOC_043185"; transcript_id "TCONS_00071390"; exon_number "5"; |
| oId "CUFF.78157.2"; tss_id "TSS54266";  |           |   |   |   |                                                                         |
| chr5 Cufflinks exon103724640            | 103725324 | . | + | . | gene_id "XLOC_043185"; transcript_id "TCONS_00071390"; exon_number "6"; |
| oId "CUFF.78157.2"; tss_id "TSS54266";  |           |   |   |   |                                                                         |
| chr5 Cufflinks exon103669873            | 103670028 | . | + | . | gene_id "XLOC_043185"; transcript_id "TCONS_00071446"; exon_number "1"; |
| oId "CUFF.78157.10"; tss_id "TSS54268"; |           |   |   |   |                                                                         |
| chr5 Cufflinks exon103722764            | 103722876 | . | + | . | gene_id "XLOC_043185"; transcript_id "TCONS_00071446"; exon_number "2"; |
| oId "CUFF.78157.10"; tss_id "TSS54268"; |           |   |   |   |                                                                         |
| chr5 Cufflinks exon103724640            | 103725324 | . | + | . | gene_id "XLOC_043185"; transcript_id "TCONS_00071446"; exon_number "3"; |
| oId "CUFF.78157.10"; tss_id "TSS54268"; |           |   |   |   |                                                                         |
| chr5 Cufflinks exon103493889            | 103497117 | . | + | . | gene_id "XLOC_043199"; transcript_id "TCONS_00071406"; exon_number "1"; |
| oId "CUFF.78180.2"; tss_id "TSS54282";  |           |   |   |   |                                                                         |
| chr5 Cufflinks exon103497680            | 103498644 | . | + | . | gene_id "XLOC_043199"; transcript_id "TCONS_00071406"; exon_number "2"; |
| oId "CUFF.78180.2"; tss_id "TSS54282";  |           |   |   |   |                                                                         |
| chr5 Cufflinks exon103740992            | 103741166 | . | + | . | gene_id "XLOC_043250"; transcript_id "TCONS_00071460"; exon_number "1"; |
| oId "CUFF.78264.2"; tss_id "TSS54333";  |           |   |   |   |                                                                         |
| chr5 Cufflinks exon103754735            | 103755551 | . | + | . | gene_id "XLOC_043250"; transcript_id "TCONS_00071460"; exon_number "2"; |
| oId "CUFF.78264.2"; tss_id "TSS54333";  |           |   |   |   |                                                                         |
| chr5 Cufflinks exon103741027            | 103741166 | . | + | . | gene_id "XLOC_043250"; transcript_id "TCONS_00071461"; exon_number "1"; |
| oId "CUFF.78264.3"; tss_id "TSS54333";  |           |   |   |   |                                                                         |
| chr5 Cufflinks exon103764333            | 103764663 | . | + | . | gene_id "XLOC_043250"; transcript_id "TCONS_00071461"; exon_number "2"; |
| oId "CUFF.78264.3"; tss_id "TSS54333";  |           |   |   |   |                                                                         |
| chr5 Cufflinks exon115641152            | 115641223 | . | + | . | gene_id "XLOC_043305"; transcript_id "TCONS_00071554"; exon_number "1"; |
| oId "CUFF.78477.2"; tss_id "TSS54401";  |           |   |   |   |                                                                         |
| chr5 Cufflinks exon115641785            | 115644065 | . | + | . | gene_id "XLOC_043305"; transcript_id "TCONS_00071554"; exon_number "2"; |
| oId "CUFF.78477.2"; tss_id "TSS54401";  |           |   |   |   |                                                                         |
| chr5 Cufflinks exon130545496            | 130545856 | . | + | . | gene_id "XLOC_043441"; transcript_id "TCONS_00071750"; exon_number "1"; |
| oId "CUFF.78852.3"; tss_id "TSS54558";  |           |   |   |   |                                                                         |
| chr5 Cufflinks exon130590788            | 130590922 | . | + | . | gene_id "XLOC_043441"; transcript_id "TCONS_00071750"; exon_number "2"; |
| oId "CUFF.78852.3"; tss_id "TSS54558";  |           |   |   |   |                                                                         |
| chr5 Cufflinks exon130593570            | 130593960 | . | + | . | gene_id "XLOC_043441"; transcript_id "TCONS_00071750"; exon_number "3"; |
| oId "CUFF.78852.3"; tss_id "TSS54558";  |           |   |   |   |                                                                         |
| chr5 Cufflinks exon130588441            | 130588822 | . | + | . | gene_id "XLOC_043441"; transcript_id "TCONS_00071754"; exon_number "1"; |
| oId "CUFF.78852.5"; tss_id "TSS54559";  |           |   |   |   |                                                                         |
| chr5 Cufflinks exon130590788            | 130590922 | . | + | . | gene_id "XLOC_043441"; transcript_id "TCONS_00071754"; exon_number "2"; |
| oId "CUFF.78852.5"; tss_id "TSS54559";  |           |   |   |   |                                                                         |
| chr5 Cufflinks exon130593570            | 130593960 | . | + | . | gene_id "XLOC_043441"; transcript_id "TCONS_00071754"; exon_number "3"; |

oId "CUFF.78852.5"; tss\_id "TSS54559";  
chr5 Cufflinks exon138724047 138724233 . + . gene\_id "XLOC\_043541"; transcript\_id "TCONS\_00071896"; exon\_number "1";  
oId "CUFF.79231.1"; tss\_id "TSS54677";  
chr5 Cufflinks exon138724577 138724702 . + . gene\_id "XLOC\_043541"; transcript\_id "TCONS\_00071896"; exon\_number "2";  
oId "CUFF.79231.1"; tss\_id "TSS54677";  
chr5 Cufflinks exon138728505 138740471 . + . gene\_id "XLOC\_043541"; transcript\_id "TCONS\_00071896"; exon\_number "3";  
oId "CUFF.79231.1"; tss\_id "TSS54677";  
chr5 Cufflinks exon139535520 139535696 . + . gene\_id "XLOC\_043593"; transcript\_id "TCONS\_00071960"; exon\_number "1";  
oId "CUFF.79320.1"; tss\_id "TSS54734";  
chr5 Cufflinks exon139546950 139547062 . + . gene\_id "XLOC\_043593"; transcript\_id "TCONS\_00071960"; exon\_number "2";  
oId "CUFF.79320.1"; tss\_id "TSS54734";  
chr5 Cufflinks exon139552333 139553937 . + . gene\_id "XLOC\_043593"; transcript\_id "TCONS\_00071960"; exon\_number "3";  
oId "CUFF.79320.1"; tss\_id "TSS54734";  
chr5 Cufflinks exon139536763 139536943 . + . gene\_id "XLOC\_043593"; transcript\_id "TCONS\_00071961"; exon\_number "1";  
oId "CUFF.79320.3"; tss\_id "TSS54735";  
chr5 Cufflinks exon139544235 139544300 . + . gene\_id "XLOC\_043593"; transcript\_id "TCONS\_00071961"; exon\_number "2";  
oId "CUFF.79320.3"; tss\_id "TSS54735";  
chr5 Cufflinks exon139546950 139547058 . + . gene\_id "XLOC\_043593"; transcript\_id "TCONS\_00071961"; exon\_number "3";  
oId "CUFF.79320.3"; tss\_id "TSS54735";  
chr5 Cufflinks exon139547266 139547387 . + . gene\_id "XLOC\_043593"; transcript\_id "TCONS\_00071961"; exon\_number "4";  
oId "CUFF.79320.3"; tss\_id "TSS54735";  
chr5 Cufflinks exon139552333 139553937 . + . gene\_id "XLOC\_043593"; transcript\_id "TCONS\_00071961"; exon\_number "5";  
oId "CUFF.79320.3"; tss\_id "TSS54735";  
chr5 Cufflinks exon139536802 139536996 . + . gene\_id "XLOC\_043593"; transcript\_id "TCONS\_00071962"; exon\_number "1";  
oId "CUFF.79320.4"; tss\_id "TSS54735";  
chr5 Cufflinks exon139544235 139544397 . + . gene\_id "XLOC\_043593"; transcript\_id "TCONS\_00071962"; exon\_number "2";  
oId "CUFF.79320.4"; tss\_id "TSS54735";  
chr5 Cufflinks exon139546950 139547058 . + . gene\_id "XLOC\_043593"; transcript\_id "TCONS\_00071962"; exon\_number "3";  
oId "CUFF.79320.4"; tss\_id "TSS54735";  
chr5 Cufflinks exon139547266 139547387 . + . gene\_id "XLOC\_043593"; transcript\_id "TCONS\_00071962"; exon\_number "4";  
oId "CUFF.79320.4"; tss\_id "TSS54735";  
chr5 Cufflinks exon139548222 139548400 . + . gene\_id "XLOC\_043593"; transcript\_id "TCONS\_00071962"; exon\_number "5";  
oId "CUFF.79320.4"; tss\_id "TSS54735";  
chr5 Cufflinks exon139552333 139553937 . + . gene\_id "XLOC\_043593"; transcript\_id "TCONS\_00071962"; exon\_number "6";  
oId "CUFF.79320.4"; tss\_id "TSS54735";  
chr5 Cufflinks exon139536904 139536943 . + . gene\_id "XLOC\_043593"; transcript\_id "TCONS\_00071963"; exon\_number "1";  
oId "CUFF.79320.5"; tss\_id "TSS54736";  
chr5 Cufflinks exon139544235 139544397 . + . gene\_id "XLOC\_043593"; transcript\_id "TCONS\_00071963"; exon\_number "2";  
oId "CUFF.79320.5"; tss\_id "TSS54736";  
chr5 Cufflinks exon139546950 139547058 . + . gene\_id "XLOC\_043593"; transcript\_id "TCONS\_00071963"; exon\_number "3";  
oId "CUFF.79320.5"; tss\_id "TSS54736";  
chr5 Cufflinks exon139547266 139547387 . + . gene\_id "XLOC\_043593"; transcript\_id "TCONS\_00071963"; exon\_number "4";  
oId "CUFF.79320.5"; tss\_id "TSS54736";

chr5 Cufflinks exon139548222 139548400 . + . gene\_id "XLOC\_043593"; transcript\_id "TCONS\_00071963"; exon\_number "5";  
oId "CUFF.79320.5"; tss\_id "TSS54736";  
chr5 Cufflinks exon139552333 139553937 . + . gene\_id "XLOC\_043593"; transcript\_id "TCONS\_00071963"; exon\_number "6";  
oId "CUFF.79320.5"; tss\_id "TSS54736";  
chr5 Cufflinks exon139543641 139544397 . + . gene\_id "XLOC\_043593"; transcript\_id "TCONS\_00071964"; exon\_number "1";  
oId "CUFF.79320.6"; tss\_id "TSS54737";  
chr5 Cufflinks exon139546950 139547058 . + . gene\_id "XLOC\_043593"; transcript\_id "TCONS\_00071964"; exon\_number "2";  
oId "CUFF.79320.6"; tss\_id "TSS54737";  
chr5 Cufflinks exon139547266 139547387 . + . gene\_id "XLOC\_043593"; transcript\_id "TCONS\_00071964"; exon\_number "3";  
oId "CUFF.79320.6"; tss\_id "TSS54737";  
chr5 Cufflinks exon139548222 139548400 . + . gene\_id "XLOC\_043593"; transcript\_id "TCONS\_00071964"; exon\_number "4";  
oId "CUFF.79320.6"; tss\_id "TSS54737";  
chr5 Cufflinks exon139552333 139553937 . + . gene\_id "XLOC\_043593"; transcript\_id "TCONS\_00071964"; exon\_number "5";  
oId "CUFF.79320.6"; tss\_id "TSS54737";  
chr5 Cufflinks exon139546807 139547058 . + . gene\_id "XLOC\_043593"; transcript\_id "TCONS\_00071966"; exon\_number "1";  
oId "CUFF.79320.7"; tss\_id "TSS54738";  
chr5 Cufflinks exon139547266 139548400 . + . gene\_id "XLOC\_043593"; transcript\_id "TCONS\_00071966"; exon\_number "2";  
oId "CUFF.79320.7"; tss\_id "TSS54738";  
chr5 Cufflinks exon139552333 139553937 . + . gene\_id "XLOC\_043593"; transcript\_id "TCONS\_00071966"; exon\_number "3";  
oId "CUFF.79320.7"; tss\_id "TSS54738";  
chr5 Cufflinks exon141770207 141770616 . + . gene\_id "XLOC\_043670"; transcript\_id "TCONS\_00072097"; exon\_number "1";  
oId "CUFF.79497.4"; tss\_id "TSS54841";  
chr5 Cufflinks exon141843535 141843624 . + . gene\_id "XLOC\_043670"; transcript\_id "TCONS\_00072097"; exon\_number "2";  
oId "CUFF.79497.4"; tss\_id "TSS54841";  
chr5 Cufflinks exon142051357 142051370 . + . gene\_id "XLOC\_043670"; transcript\_id "TCONS\_00072097"; exon\_number "3";  
oId "CUFF.79497.4"; tss\_id "TSS54841";  
chr5 Cufflinks exon142985119 142985296 . + . gene\_id "XLOC\_043680"; transcript\_id "TCONS\_00072107"; exon\_number "1";  
oId "CUFF.79524.1"; tss\_id "TSS54852";  
chr5 Cufflinks exon143042460 143042522 . + . gene\_id "XLOC\_043680"; transcript\_id "TCONS\_00072107"; exon\_number "2";  
oId "CUFF.79524.1"; tss\_id "TSS54852";  
chr5 Cufflinks exon143048959 143049051 . + . gene\_id "XLOC\_043680"; transcript\_id "TCONS\_00072107"; exon\_number "3";  
oId "CUFF.79524.1"; tss\_id "TSS54852";  
chr5 Cufflinks exon143052144 143052262 . + . gene\_id "XLOC\_043680"; transcript\_id "TCONS\_00072107"; exon\_number "4";  
oId "CUFF.79524.1"; tss\_id "TSS54852";  
chr5 Cufflinks exon143266953 143267086 . + . gene\_id "XLOC\_043680"; transcript\_id "TCONS\_00072107"; exon\_number "5";  
oId "CUFF.79524.1"; tss\_id "TSS54852";  
chr5 Cufflinks exon142985122 142985296 . + . gene\_id "XLOC\_043680"; transcript\_id "TCONS\_00072108"; exon\_number "1";  
oId "CUFF.79524.4"; tss\_id "TSS54852";  
chr5 Cufflinks exon142987763 142987873 . + . gene\_id "XLOC\_043680"; transcript\_id "TCONS\_00072108"; exon\_number "2";  
oId "CUFF.79524.4"; tss\_id "TSS54852";  
chr5 Cufflinks exon143042460 143042522 . + . gene\_id "XLOC\_043680"; transcript\_id "TCONS\_00072108"; exon\_number "3";  
oId "CUFF.79524.4"; tss\_id "TSS54852";  
chr5 Cufflinks exon 143048959 143049051 . + . gene\_id "XLOC\_043680"; transcript\_id "TCONS\_00072108";

exon\_number "4"; oId "CUFF.79524.4"; tss\_id "TSS54852";  
chr5 Cufflinks exon 143052144 143052262 . + . gene\_id "XLOC\_043680"; transcript\_id "TCONS\_00072108";  
exon\_number "5"; oId "CUFF.79524.4"; tss\_id "TSS54852";  
chr5 Cufflinks exon 143136452 143136552 . + . gene\_id "XLOC\_043680"; transcript\_id "TCONS\_00072108";  
exon\_number "6"; oId "CUFF.79524.4"; tss\_id "TSS54852";  
chr5 Cufflinks exon 142985122 142985296 . + . gene\_id "XLOC\_043680"; transcript\_id "TCONS\_00072109";  
exon\_number "1"; oId "CUFF.79524.3"; tss\_id "TSS54852";  
chr5 Cufflinks exon 143042460 143042522 . + . gene\_id "XLOC\_043680"; transcript\_id "TCONS\_00072109";  
exon\_number "2"; oId "CUFF.79524.3"; tss\_id "TSS54852";  
chr5 Cufflinks exon 143048959 143049051 . + . gene\_id "XLOC\_043680"; transcript\_id "TCONS\_00072109";  
exon\_number "3"; oId "CUFF.79524.3"; tss\_id "TSS54852";  
chr5 Cufflinks exon 143052144 143052262 . + . gene\_id "XLOC\_043680"; transcript\_id "TCONS\_00072109";  
exon\_number "4"; oId "CUFF.79524.3"; tss\_id "TSS54852";  
chr5 Cufflinks exon 143146493 143146507 . + . gene\_id "XLOC\_043680"; transcript\_id "TCONS\_00072109";  
exon\_number "5"; oId "CUFF.79524.3"; tss\_id "TSS54852";  
chr5 Cufflinks exon 150272716 150272758 . + . gene\_id "XLOC\_043738"; transcript\_id "TCONS\_00072216";  
exon\_number "1"; oId "CUFF.79702.6"; tss\_id "TSS54933";  
chr5 Cufflinks exon 150276390 150276693 . + . gene\_id "XLOC\_043738"; transcript\_id "TCONS\_00072216";  
exon\_number "2"; oId "CUFF.79702.6"; tss\_id "TSS54933";  
chr5 Cufflinks exon 150280151 150280272 . + . gene\_id "XLOC\_043738"; transcript\_id "TCONS\_00072216";  
exon\_number "3"; oId "CUFF.79702.6"; tss\_id "TSS54933";  
chr5 Cufflinks exon 150591634 150591820 . + . gene\_id "XLOC\_043748"; transcript\_id "TCONS\_00072225";  
exon\_number "1"; oId "CUFF.79744.3"; tss\_id "TSS54945";  
chr5 Cufflinks exon 150592320 150592450 . + . gene\_id "XLOC\_043748"; transcript\_id "TCONS\_00072225";  
exon\_number "2"; oId "CUFF.79744.3"; tss\_id "TSS54945";  
chr5 Cufflinks exon 150603037 150604381 . + . gene\_id "XLOC\_043748"; transcript\_id "TCONS\_00072225";  
exon\_number "3"; oId "CUFF.79744.3"; tss\_id "TSS54945";  
chr5 Cufflinks exon 150591634 150591820 . + . gene\_id "XLOC\_043748"; transcript\_id "TCONS\_00072224";  
exon\_number "1"; oId "CUFF.79744.2"; tss\_id "TSS54945";  
chr5 Cufflinks exon 150592323 150592450 . + . gene\_id "XLOC\_043748"; transcript\_id "TCONS\_00072224";  
exon\_number "2"; oId "CUFF.79744.2"; tss\_id "TSS54945";  
chr5 Cufflinks exon 150599905 150604381 . + . gene\_id "XLOC\_043748"; transcript\_id "TCONS\_00072224";  
exon\_number "3"; oId "CUFF.79744.2"; tss\_id "TSS54945";  
chr5 Cufflinks exon 150591649 150591820 . + . gene\_id "XLOC\_043748"; transcript\_id "TCONS\_00072227";  
exon\_number "1"; oId "CUFF.79744.5"; tss\_id "TSS54945";  
chr5 Cufflinks exon 150592320 150592450 . + . gene\_id "XLOC\_043748"; transcript\_id "TCONS\_00072227";  
exon\_number "2"; oId "CUFF.79744.5"; tss\_id "TSS54945";  
chr5 Cufflinks exon 150599905 150604381 . + . gene\_id "XLOC\_043748"; transcript\_id "TCONS\_00072227";  
exon\_number "3"; oId "CUFF.79744.5"; tss\_id "TSS54945";  
chr5 Cufflinks exon 159895258 159895447 . + . gene\_id "XLOC\_043817"; transcript\_id "TCONS\_00072325";  
exon\_number "1"; oId "CUFF.79965.1"; tss\_id "TSS55024";  
chr5 Cufflinks exon 159912306 159914433 . + . gene\_id "XLOC\_043817"; transcript\_id "TCONS\_00072325";  
exon\_number "2"; oId "CUFF.79965.1"; tss\_id "TSS55024";

chr5 Cufflinks exon 169730469 169730718 . + . gene\_id "XLOC\_043838"; transcript\_id "TCONS\_00072361";  
exon\_number "1"; oId "CUFF.80046.1"; tss\_id "TSS55049";

chr5 Cufflinks exon 169731372 169732339 . + . gene\_id "XLOC\_043838"; transcript\_id "TCONS\_00072361";  
exon\_number "2"; oId "CUFF.80046.1"; tss\_id "TSS55049";

chr5 Cufflinks exon 169758371 169758562 . + . gene\_id "XLOC\_043839"; transcript\_id "TCONS\_00072364";  
exon\_number "1"; oId "CUFF.80054.3"; tss\_id "TSS55050";

chr5 Cufflinks exon 169759852 169759941 . + . gene\_id "XLOC\_043839"; transcript\_id "TCONS\_00072364";  
exon\_number "2"; oId "CUFF.80054.3"; tss\_id "TSS55050";

chr5 Cufflinks exon 169760138 169762529 . + . gene\_id "XLOC\_043839"; transcript\_id "TCONS\_00072364";  
exon\_number "3"; oId "CUFF.80054.3"; tss\_id "TSS55050";

chr5 Cufflinks exon 169758371 169758558 . + . gene\_id "XLOC\_043839"; transcript\_id "TCONS\_00072363";  
exon\_number "1"; oId "CUFF.80054.2"; tss\_id "TSS55050";

chr5 Cufflinks exon 169759852 169759941 . + . gene\_id "XLOC\_043839"; transcript\_id "TCONS\_00072363";  
exon\_number "2"; oId "CUFF.80054.2"; tss\_id "TSS55050";

chr5 Cufflinks exon 169760138 169762529 . + . gene\_id "XLOC\_043839"; transcript\_id "TCONS\_00072363";  
exon\_number "3"; oId "CUFF.80054.2"; tss\_id "TSS55050";

chr5 Cufflinks exon 169758371 169758581 . + . gene\_id "XLOC\_043839"; transcript\_id "TCONS\_00072362";  
exon\_number "1"; oId "CUFF.80054.1"; tss\_id "TSS55050";

chr5 Cufflinks exon 169759852 169759941 . + . gene\_id "XLOC\_043839"; transcript\_id "TCONS\_00072362";  
exon\_number "2"; oId "CUFF.80054.1"; tss\_id "TSS55050";

chr5 Cufflinks exon 169760138 169762529 . + . gene\_id "XLOC\_043839"; transcript\_id "TCONS\_00072362";  
exon\_number "3"; oId "CUFF.80054.1"; tss\_id "TSS55050";

chr5 Cufflinks exon 169758377 169758487 . + . gene\_id "XLOC\_043839"; transcript\_id "TCONS\_00072367";  
exon\_number "1"; oId "CUFF.80054.6"; tss\_id "TSS55050";

chr5 Cufflinks exon 169759852 169759941 . + . gene\_id "XLOC\_043839"; transcript\_id "TCONS\_00072367";  
exon\_number "2"; oId "CUFF.80054.6"; tss\_id "TSS55050";

chr5 Cufflinks exon 169760138 169762529 . + . gene\_id "XLOC\_043839"; transcript\_id "TCONS\_00072367";  
exon\_number "3"; oId "CUFF.80054.6"; tss\_id "TSS55050";

chr5 Cufflinks exon 169758377 169758483 . + . gene\_id "XLOC\_043839"; transcript\_id "TCONS\_00072366";  
exon\_number "1"; oId "CUFF.80054.5"; tss\_id "TSS55050";

chr5 Cufflinks exon 169759852 169759941 . + . gene\_id "XLOC\_043839"; transcript\_id "TCONS\_00072366"; exon\_number "2";  
oId "CUFF.80054.5"; tss\_id "TSS55050";

chr5 Cufflinks exon 169760138 169762529 . + . gene\_id "XLOC\_043839"; transcript\_id "TCONS\_00072366"; exon\_number "3";  
oId "CUFF.80054.5"; tss\_id "TSS55050";

chr5 Cufflinks exon 169758377 169758562 . + . gene\_id "XLOC\_043839"; transcript\_id "TCONS\_00072365"; exon\_number "1";  
oId "CUFF.80054.4"; tss\_id "TSS55050";

chr5 Cufflinks exon 169760138 169762529 . + . gene\_id "XLOC\_043839"; transcript\_id "TCONS\_00072365"; exon\_number "2";  
oId "CUFF.80054.4"; tss\_id "TSS55050";

chr5 Cufflinks exon 179719185 179720418 . + . gene\_id "XLOC\_043973"; transcript\_id "TCONS\_00072587"; exon\_number "1";  
oId "CUFF.80541.2"; tss\_id "TSS55214";

chr5 Cufflinks exon 179722035 179723351 . + . gene\_id "XLOC\_043973"; transcript\_id "TCONS\_00072587"; exon\_number "2";  
oId "CUFF.80541.2"; tss\_id "TSS55214";

chr5 Cufflinks exon 179719213 179719481 . + . gene\_id "XLOC\_043973"; transcript\_id "TCONS\_00072588"; exon\_number "1";

oId "CUFF.80541.3"; tss\_id "TSS55214";  
chr5 Cufflinks exon179722035 179723351 . + . gene\_id "XLOC\_043973"; transcript\_id "TCONS\_00072588"; exon\_number "2";  
oId "CUFF.80541.3"; tss\_id "TSS55214";  
chr5 Cufflinks exon180618647 180619016 . + . gene\_id "XLOC\_043984"; transcript\_id "TCONS\_00072605"; exon\_number "1";  
oId "CUFF.80589.1"; tss\_id "TSS55229";  
chr5 Cufflinks exon180620342 180620467 . + . gene\_id "XLOC\_043984"; transcript\_id "TCONS\_00072605"; exon\_number "2";  
oId "CUFF.80589.1"; tss\_id "TSS55229";  
chr5 Cufflinks exon180621234 180623897 . + . gene\_id "XLOC\_043984"; transcript\_id "TCONS\_00072605"; exon\_number "3";  
oId "CUFF.80589.1"; tss\_id "TSS55229";  
chr5 Cufflinks exon180618907 180619140 . + . gene\_id "XLOC\_043984"; transcript\_id "TCONS\_00072607"; exon\_number "1";  
oId "CUFF.80589.3"; tss\_id "TSS55230";  
chr5 Cufflinks exon180621234 180623897 . + . gene\_id "XLOC\_043984"; transcript\_id "TCONS\_00072607"; exon\_number "2";  
oId "CUFF.80589.3"; tss\_id "TSS55230";  
chr5 Cufflinks exon180618907 180619192 . + . gene\_id "XLOC\_043984"; transcript\_id "TCONS\_00072606"; exon\_number "1";  
oId "CUFF.80589.2"; tss\_id "TSS55230";  
chr5 Cufflinks exon180621234 180623897 . + . gene\_id "XLOC\_043984"; transcript\_id "TCONS\_00072606"; exon\_number "2";  
oId "CUFF.80589.2"; tss\_id "TSS55230";  
chr5 Cufflinks exon180619031 180619140 . + . gene\_id "XLOC\_043984"; transcript\_id "TCONS\_00072608"; exon\_number "1";  
oId "CUFF.80589.4"; tss\_id "TSS55231";  
chr5 Cufflinks exon180620342 180620467 . + . gene\_id "XLOC\_043984"; transcript\_id "TCONS\_00072608"; exon\_number "2";  
oId "CUFF.80589.4"; tss\_id "TSS55231";  
chr5 Cufflinks exon180621234 180623897 . + . gene\_id "XLOC\_043984"; transcript\_id "TCONS\_00072608"; exon\_number "3";  
oId "CUFF.80589.4"; tss\_id "TSS55231";  
chr5 Cufflinks exon180619081 180619192 . + . gene\_id "XLOC\_043984"; transcript\_id "TCONS\_00072609"; exon\_number "1";  
oId "CUFF.80589.5"; tss\_id "TSS55231";  
chr5 Cufflinks exon180620342 180620467 . + . gene\_id "XLOC\_043984"; transcript\_id "TCONS\_00072609"; exon\_number "2";  
oId "CUFF.80589.5"; tss\_id "TSS55231";  
chr5 Cufflinks exon180621234 180623897 . + . gene\_id "XLOC\_043984"; transcript\_id "TCONS\_00072609"; exon\_number "3";  
oId "CUFF.80589.5"; tss\_id "TSS55231";  
chr5 Cufflinks exon180619353 180620467 . + . gene\_id "XLOC\_043984"; transcript\_id "TCONS\_00072610"; exon\_number "1";  
oId "CUFF.80589.6"; tss\_id "TSS55232";  
chr5 Cufflinks exon180621234 180623897 . + . gene\_id "XLOC\_043984"; transcript\_id "TCONS\_00072610"; exon\_number "2";  
oId "CUFF.80589.6"; tss\_id "TSS55232";  
chr5 Cufflinks exon180673493 180680080 . + . gene\_id "XLOC\_043988"; transcript\_id "TCONS\_00072615"; exon\_number "1";  
oId "CUFF.80598.2"; tss\_id "TSS55236";  
chr5 Cufflinks exon180681420 180684997 . + . gene\_id "XLOC\_043988"; transcript\_id "TCONS\_00072615"; exon\_number "2";  
oId "CUFF.80598.2"; tss\_id "TSS55236";  
chr5 Cufflinks exon180673541 180673882 . + . gene\_id "XLOC\_043988"; transcript\_id "TCONS\_00072616"; exon\_number "1";  
oId "CUFF.80598.3"; tss\_id "TSS55236";  
chr5 Cufflinks exon180674116 180674386 . + . gene\_id "XLOC\_043988"; transcript\_id "TCONS\_00072616"; exon\_number "2";  
oId "CUFF.80598.3"; tss\_id "TSS55236";  
chr5 Cufflinks exon180684188 180684997 . + . gene\_id "XLOC\_043988"; transcript\_id "TCONS\_00072616"; exon\_number "3";  
oId "CUFF.80598.3"; tss\_id "TSS55236";



chr5 Cufflinks exon555121 557120 . - . gene\_id "XLOC\_044003"; transcript\_id "TCONS\_00072642"; exon\_number "1"; oId  
"CUFF.75174.3"; tss\_id "TSS55255";  
chr5 Cufflinks exon558387 559074 . - . gene\_id "XLOC\_044003"; transcript\_id "TCONS\_00072642"; exon\_number "2"; oId  
"CUFF.75174.3"; tss\_id "TSS55255";  
chr5 Cufflinks exon559221 559686 . - . gene\_id "XLOC\_044003"; transcript\_id "TCONS\_00072642"; exon\_number "3"; oId  
"CUFF.75174.3"; tss\_id "TSS55255";  
chr5 Cufflinks exon555121 555986 . - . gene\_id "XLOC\_044003"; transcript\_id "TCONS\_00072641"; exon\_number "1"; oId  
"CUFF.75174.2"; tss\_id "TSS55255";  
chr5 Cufflinks exon556726 557858 . - . gene\_id "XLOC\_044003"; transcript\_id "TCONS\_00072641"; exon\_number "2"; oId  
"CUFF.75174.2"; tss\_id "TSS55255";  
chr5 Cufflinks exon557912 559686 . - . gene\_id "XLOC\_044003"; transcript\_id "TCONS\_00072641"; exon\_number "3"; oId  
"CUFF.75174.2"; tss\_id "TSS55255";  
chr5 Cufflinks exon555121 555986 . - . gene\_id "XLOC\_044003"; transcript\_id "TCONS\_00072640"; exon\_number "1"; oId  
"CUFF.75174.1"; tss\_id "TSS55255";  
chr5 Cufflinks exon556726 557809 . - . gene\_id "XLOC\_044003"; transcript\_id "TCONS\_00072640"; exon\_number "2"; oId  
"CUFF.75174.1"; tss\_id "TSS55255";  
chr5 Cufflinks exon558019 559686 . - . gene\_id "XLOC\_044003"; transcript\_id "TCONS\_00072640"; exon\_number "3"; oId  
"CUFF.75174.1"; tss\_id "TSS55255";  
chr5 Cufflinks exon954833 962696 . - . gene\_id "XLOC\_044018"; transcript\_id "TCONS\_00072673"; exon\_number "1"; oId  
"CUFF.75218.2"; tss\_id "TSS55277";  
chr5 Cufflinks exon964214 964258 . - . gene\_id "XLOC\_044018"; transcript\_id "TCONS\_00072673"; exon\_number "2"; oId  
"CUFF.75218.2"; tss\_id "TSS55277";  
chr5 Cufflinks exon1170884 1173593 . - . gene\_id "XLOC\_044023"; transcript\_id "TCONS\_00072680"; exon\_number "1"; oId  
"CUFF.75238.1"; tss\_id "TSS55284";  
chr5 Cufflinks exon1174639 1174745 . - . gene\_id "XLOC\_044023"; transcript\_id "TCONS\_00072680"; exon\_number "2"; oId  
"CUFF.75238.1"; tss\_id "TSS55284";  
chr5 Cufflinks exon1175244 1175803 . - . gene\_id "XLOC\_044023"; transcript\_id "TCONS\_00072680"; exon\_number "3"; oId  
"CUFF.75238.1"; tss\_id "TSS55284";  
chr5 Cufflinks exon1176076 1176659 . - . gene\_id "XLOC\_044023"; transcript\_id "TCONS\_00072680"; exon\_number "4"; oId  
"CUFF.75238.1"; tss\_id "TSS55284";  
chr5 Cufflinks exon1178553 1178720 . - . gene\_id "XLOC\_044023"; transcript\_id "TCONS\_00072680"; exon\_number "5"; oId  
"CUFF.75238.1"; tss\_id "TSS55284";  
chr5 Cufflinks exon1246990 1247471 . - . gene\_id "XLOC\_044025"; transcript\_id "TCONS\_00072682"; exon\_number "1"; oId  
"CUFF.75242.1"; tss\_id "TSS55286";  
chr5 Cufflinks exon1247552 1252886 . - . gene\_id "XLOC\_044025"; transcript\_id "TCONS\_00072682"; exon\_number "2"; oId  
"CUFF.75242.1"; tss\_id "TSS55286";  
chr5 Cufflinks exon1705650 1705684 . - . gene\_id "XLOC\_044046"; transcript\_id "TCONS\_00072718"; exon\_number "1"; oId  
"CUFF.75282.1"; tss\_id "TSS55314";  
chr5 Cufflinks exon1722998 1723164 . - . gene\_id "XLOC\_044046"; transcript\_id "TCONS\_00072718"; exon\_number "2"; oId  
"CUFF.75282.1"; tss\_id "TSS55314";  
chr5 Cufflinks exon1723763 1723914 . - . gene\_id "XLOC\_044046"; transcript\_id "TCONS\_00072718"; exon\_number "3"; oId  
"CUFF.75282.1"; tss\_id "TSS55314";  
chr5 Cufflinks exon1725235 1725461 . - . gene\_id "XLOC\_044046"; transcript\_id "TCONS\_00072718"; exon\_number "4"; oId

"CUFF.75282.1"; tss\_id "TSS55314";  
chr5 Cufflinks exon1707393 1707618 . - . gene\_id "XLOC\_044046"; transcript\_id "TCONS\_00072719"; exon\_number "1"; oId  
"CUFF.75282.2"; tss\_id "TSS55314";  
chr5 Cufflinks exon1722998 1723165 . - . gene\_id "XLOC\_044046"; transcript\_id "TCONS\_00072719"; exon\_number "2"; oId  
"CUFF.75282.2"; tss\_id "TSS55314";  
chr5 Cufflinks exon1723764 1723914 . - . gene\_id "XLOC\_044046"; transcript\_id "TCONS\_00072719"; exon\_number "3"; oId  
"CUFF.75282.2"; tss\_id "TSS55314";  
chr5 Cufflinks exon1725235 1725461 . - . gene\_id "XLOC\_044046"; transcript\_id "TCONS\_00072719"; exon\_number "4"; oId  
"CUFF.75282.2"; tss\_id "TSS55314";  
chr5 Cufflinks exon1718938 1720833 . - . gene\_id "XLOC\_044046"; transcript\_id "TCONS\_00072720"; exon\_number "1"; oId  
"CUFF.75282.3"; tss\_id "TSS55314";  
chr5 Cufflinks exon1722998 1723164 . - . gene\_id "XLOC\_044046"; transcript\_id "TCONS\_00072720"; exon\_number "2"; oId  
"CUFF.75282.3"; tss\_id "TSS55314";  
chr5 Cufflinks exon1723763 1723916 . - . gene\_id "XLOC\_044046"; transcript\_id "TCONS\_00072720"; exon\_number "3"; oId  
"CUFF.75282.3"; tss\_id "TSS55314";  
chr5 Cufflinks exon1725237 1725461 . - . gene\_id "XLOC\_044046"; transcript\_id "TCONS\_00072720"; exon\_number "4"; oId  
"CUFF.75282.3"; tss\_id "TSS55314";  
chr5 Cufflinks exon1963307 1967077 . - . gene\_id "XLOC\_044055"; transcript\_id "TCONS\_00072732"; exon\_number "1"; oId  
"CUFF.75314.2"; tss\_id "TSS55326";  
chr5 Cufflinks exon1967191 1968172 . - . gene\_id "XLOC\_044055"; transcript\_id "TCONS\_00072732"; exon\_number "2"; oId  
"CUFF.75314.2"; tss\_id "TSS55326";  
chr5 Cufflinks exon1963307 1963814 . - . gene\_id "XLOC\_044055"; transcript\_id "TCONS\_00072733"; exon\_number "1"; oId  
"CUFF.75314.4"; tss\_id "TSS55326";  
chr5 Cufflinks exon1963922 1963970 . - . gene\_id "XLOC\_044055"; transcript\_id "TCONS\_00072733"; exon\_number "2"; oId  
"CUFF.75314.4"; tss\_id "TSS55326";  
chr5 Cufflinks exon1966914 1967077 . - . gene\_id "XLOC\_044055"; transcript\_id "TCONS\_00072733"; exon\_number "3"; oId  
"CUFF.75314.4"; tss\_id "TSS55326";  
chr5 Cufflinks exon1967191 1968219 . - . gene\_id "XLOC\_044055"; transcript\_id "TCONS\_00072733"; exon\_number "4"; oId  
"CUFF.75314.4"; tss\_id "TSS55326";  
chr5 Cufflinks exon1963307 1963970 . - . gene\_id "XLOC\_044055"; transcript\_id "TCONS\_00072734"; exon\_number "1"; oId  
"CUFF.75314.3"; tss\_id "TSS55327";  
chr5 Cufflinks exon1966914 1967077 . - . gene\_id "XLOC\_044055"; transcript\_id "TCONS\_00072734"; exon\_number "2"; oId  
"CUFF.75314.3"; tss\_id "TSS55327";  
chr5 Cufflinks exon1974352 1975510 . - . gene\_id "XLOC\_044055"; transcript\_id "TCONS\_00072734"; exon\_number "3"; oId  
"CUFF.75314.3"; tss\_id "TSS55327";  
chr5 Cufflinks exon1973313 1974450 . - . gene\_id "XLOC\_044055"; transcript\_id "TCONS\_00072736"; exon\_number "1"; oId  
"CUFF.75314.5"; tss\_id "TSS55327";  
chr5 Cufflinks exon1975388 1975441 . - . gene\_id "XLOC\_044055"; transcript\_id "TCONS\_00072736"; exon\_number "2"; oId  
"CUFF.75314.5"; tss\_id "TSS55327";  
chr5 Cufflinks exon3162861 3163388 . - . gene\_id "XLOC\_044066"; transcript\_id "TCONS\_00072746"; exon\_number "1"; oId  
"CUFF.75365.1"; tss\_id "TSS55338";  
chr5 Cufflinks exon3191768 3191962 . - . gene\_id "XLOC\_044066"; transcript\_id "TCONS\_00072746"; exon\_number "2"; oId  
"CUFF.75365.1"; tss\_id "TSS55338";

chr5 Cufflinks exon3192090 3192794 . - . gene\_id "XLOC\_044066"; transcript\_id "TCONS\_00072746"; exon\_number "3"; oId  
"CUFF.75365.1"; tss\_id "TSS55338";  
chr5 Cufflinks exon3190906 3191958 . - . gene\_id "XLOC\_044066"; transcript\_id "TCONS\_00072748"; exon\_number "1"; oId  
"CUFF.75365.2"; tss\_id "TSS55338";  
chr5 Cufflinks exon3192090 3192147 . - . gene\_id "XLOC\_044066"; transcript\_id "TCONS\_00072748"; exon\_number "2"; oId  
"CUFF.75365.2"; tss\_id "TSS55338";  
chr5 Cufflinks exon3192689 3192739 . - . gene\_id "XLOC\_044066"; transcript\_id "TCONS\_00072748"; exon\_number "3"; oId  
"CUFF.75365.2"; tss\_id "TSS55338";  
chr5 Cufflinks exon3190906 3191958 . - . gene\_id "XLOC\_044066"; transcript\_id "TCONS\_00072749"; exon\_number "1"; oId  
"CUFF.75365.3"; tss\_id "TSS55338";  
chr5 Cufflinks exon3192090 3192794 . - . gene\_id "XLOC\_044066"; transcript\_id "TCONS\_00072749"; exon\_number "2"; oId  
"CUFF.75365.3"; tss\_id "TSS55338";  
chr5 Cufflinks exon4520773 4521258 . - . gene\_id "XLOC\_044105"; transcript\_id "TCONS\_00072787"; exon\_number "1"; oId  
"CUFF.75444.1"; tss\_id "TSS55377";  
chr5 Cufflinks exon4522378 4526137 . - . gene\_id "XLOC\_044105"; transcript\_id "TCONS\_00072787"; exon\_number "2"; oId  
"CUFF.75444.1"; tss\_id "TSS55377";  
chr5 Cufflinks exon4530075 4530189 . - . gene\_id "XLOC\_044105"; transcript\_id "TCONS\_00072787"; exon\_number "3"; oId  
"CUFF.75444.1"; tss\_id "TSS55377";  
chr5 Cufflinks exon4615537 4616009 . - . gene\_id "XLOC\_044105"; transcript\_id "TCONS\_00072787"; exon\_number "4"; oId  
"CUFF.75444.1"; tss\_id "TSS55377";  
chr5 Cufflinks exon4521719 4526137 . - . gene\_id "XLOC\_044105"; transcript\_id "TCONS\_00072788"; exon\_number "1"; oId  
"CUFF.75444.2"; tss\_id "TSS55377";  
chr5 Cufflinks exon4530075 4530189 . - . gene\_id "XLOC\_044105"; transcript\_id "TCONS\_00072788"; exon\_number "2"; oId  
"CUFF.75444.2"; tss\_id "TSS55377";  
chr5 Cufflinks exon4615537 4616005 . - . gene\_id "XLOC\_044105"; transcript\_id "TCONS\_00072788"; exon\_number "3"; oId  
"CUFF.75444.2"; tss\_id "TSS55377";  
chr5 Cufflinks exon5292504 5293787 . - . gene\_id "XLOC\_044109"; transcript\_id "TCONS\_00072792"; exon\_number "1"; oId  
"CUFF.75467.1"; tss\_id "TSS55381";  
chr5 Cufflinks exon5319810 5319885 . - . gene\_id "XLOC\_044109"; transcript\_id "TCONS\_00072792"; exon\_number "2"; oId  
"CUFF.75467.1"; tss\_id "TSS55381";  
chr5 Cufflinks exon5420864 5420957 . - . gene\_id "XLOC\_044109"; transcript\_id "TCONS\_00072792"; exon\_number "3"; oId  
"CUFF.75467.1"; tss\_id "TSS55381";  
chr5 Cufflinks exon5421518 5422429 . - . gene\_id "XLOC\_044109"; transcript\_id "TCONS\_00072792"; exon\_number "4"; oId  
"CUFF.75467.1"; tss\_id "TSS55381";  
chr5 Cufflinks exon5314914 5315291 . - . gene\_id "XLOC\_044109"; transcript\_id "TCONS\_00072797"; exon\_number "1"; oId  
"CUFF.75467.2"; tss\_id "TSS55382";  
chr5 Cufflinks exon5317275 5317325 . - . gene\_id "XLOC\_044109"; transcript\_id "TCONS\_00072797"; exon\_number "2"; oId  
"CUFF.75467.2"; tss\_id "TSS55382";  
chr5 Cufflinks exon5319810 5319891 . - . gene\_id "XLOC\_044109"; transcript\_id "TCONS\_00072797"; exon\_number "3"; oId  
"CUFF.75467.2"; tss\_id "TSS55382";  
chr5 Cufflinks exon5420864 5420953 . - . gene\_id "XLOC\_044109"; transcript\_id "TCONS\_00072797"; exon\_number "4"; oId  
"CUFF.75467.2"; tss\_id "TSS55382";  
chr5 Cufflinks exon5421516 5422594 . - . gene\_id "XLOC\_044109"; transcript\_id "TCONS\_00072797"; exon\_number "5"; oId

"CUFF.75467.2"; tss\_id "TSS55382";  
chr5 Cufflinks exon5315581 5319891 . - . gene\_id "XLOC\_044109"; transcript\_id "TCONS\_00072800"; exon\_number "1"; oId  
"CUFF.75467.5"; tss\_id "TSS55382";  
chr5 Cufflinks exon5420864 5420953 . - . gene\_id "XLOC\_044109"; transcript\_id "TCONS\_00072800"; exon\_number "2"; oId  
"CUFF.75467.5"; tss\_id "TSS55382";  
chr5 Cufflinks exon5421516 5422594 . - . gene\_id "XLOC\_044109"; transcript\_id "TCONS\_00072800"; exon\_number "3"; oId  
"CUFF.75467.5"; tss\_id "TSS55382";  
chr5 Cufflinks exon5315581 5317317 . - . gene\_id "XLOC\_044109"; transcript\_id "TCONS\_00072799"; exon\_number "1"; oId  
"CUFF.75467.4"; tss\_id "TSS55382";  
chr5 Cufflinks exon5319810 5319891 . - . gene\_id "XLOC\_044109"; transcript\_id "TCONS\_00072799"; exon\_number "2"; oId  
"CUFF.75467.4"; tss\_id "TSS55382";  
chr5 Cufflinks exon5420864 5420953 . - . gene\_id "XLOC\_044109"; transcript\_id "TCONS\_00072799"; exon\_number "3"; oId  
"CUFF.75467.4"; tss\_id "TSS55382";  
chr5 Cufflinks exon5421516 5422594 . - . gene\_id "XLOC\_044109"; transcript\_id "TCONS\_00072799"; exon\_number "4"; oId  
"CUFF.75467.4"; tss\_id "TSS55382";  
chr5 Cufflinks exon5315581 5319885 . - . gene\_id "XLOC\_044109"; transcript\_id "TCONS\_00072798"; exon\_number "1"; oId  
"CUFF.75467.3"; tss\_id "TSS55382";  
chr5 Cufflinks exon5420864 5420953 . - . gene\_id "XLOC\_044109"; transcript\_id "TCONS\_00072798"; exon\_number "2"; oId  
"CUFF.75467.3"; tss\_id "TSS55382";  
chr5 Cufflinks exon5421516 5422594 . - . gene\_id "XLOC\_044109"; transcript\_id "TCONS\_00072798"; exon\_number "3"; oId  
"CUFF.75467.3"; tss\_id "TSS55382";  
chr5 Cufflinks exon5390243 5391316 . - . gene\_id "XLOC\_044109"; transcript\_id "TCONS\_00072811"; exon\_number "1"; oId  
"CUFF.75467.7"; tss\_id "TSS55383";  
chr5 Cufflinks exon5391544 5391563 . - . gene\_id "XLOC\_044109"; transcript\_id "TCONS\_00072811"; exon\_number "2"; oId  
"CUFF.75467.7"; tss\_id "TSS55383";  
chr5 Cufflinks exon5390243 5391317 . - . gene\_id "XLOC\_044109"; transcript\_id "TCONS\_00072812"; exon\_number "1"; oId  
"CUFF.75467.10"; tss\_id "TSS55384";  
chr5 Cufflinks exon5393483 5393505 . - . gene\_id "XLOC\_044109"; transcript\_id "TCONS\_00072812"; exon\_number "2"; oId  
"CUFF.75467.10"; tss\_id "TSS55384";  
chr5 Cufflinks exon5390243 5391316 . - . gene\_id "XLOC\_044109"; transcript\_id "TCONS\_00072813"; exon\_number "1"; oId  
"CUFF.75467.8"; tss\_id "TSS55385";  
chr5 Cufflinks exon5393061 5395655 . - . gene\_id "XLOC\_044109"; transcript\_id "TCONS\_00072813"; exon\_number "2"; oId  
"CUFF.75467.8"; tss\_id "TSS55385";  
chr5 Cufflinks exon5390243 5390514 . - . gene\_id "XLOC\_044109"; transcript\_id "TCONS\_00072815"; exon\_number "1"; oId  
"CUFF.75467.9"; tss\_id "TSS55382";  
chr5 Cufflinks exon5390544 5391316 . - . gene\_id "XLOC\_044109"; transcript\_id "TCONS\_00072815"; exon\_number "2"; oId  
"CUFF.75467.9"; tss\_id "TSS55382";  
chr5 Cufflinks exon5420864 5420957 . - . gene\_id "XLOC\_044109"; transcript\_id "TCONS\_00072815"; exon\_number "3"; oId  
"CUFF.75467.9"; tss\_id "TSS55382";  
chr5 Cufflinks exon5421516 5422594 . - . gene\_id "XLOC\_044109"; transcript\_id "TCONS\_00072815"; exon\_number "4"; oId  
"CUFF.75467.9"; tss\_id "TSS55382";  
chr5 Cufflinks exon5390243 5391316 . - . gene\_id "XLOC\_044109"; transcript\_id "TCONS\_00072814"; exon\_number "1"; oId  
"CUFF.75467.6"; tss\_id "TSS55382";

chr5 Cufflinks exon5420864 5420953 . - . gene\_id "XLOC\_044109"; transcript\_id "TCONS\_00072814"; exon\_number "2"; oId "CUFF.75467.6"; tss\_id "TSS55382";

chr5 Cufflinks exon5421516 5422594 . - . gene\_id "XLOC\_044109"; transcript\_id "TCONS\_00072814"; exon\_number "3"; oId "CUFF.75467.6"; tss\_id "TSS55382";

chr5 Cufflinks exon5393584 5395403 . - . gene\_id "XLOC\_044109"; transcript\_id "TCONS\_00072816"; exon\_number "1"; oId "CUFF.75467.11"; tss\_id "TSS55386";

chr5 Cufflinks exon5406336 5406368 . - . gene\_id "XLOC\_044109"; transcript\_id "TCONS\_00072816"; exon\_number "2"; oId "CUFF.75467.11"; tss\_id "TSS55386";

chr5 Cufflinks exon5393584 5395403 . - . gene\_id "XLOC\_044109"; transcript\_id "TCONS\_00072817"; exon\_number "1"; oId "CUFF.75467.13"; tss\_id "TSS55382";

chr5 Cufflinks exon5420864 5420953 . - . gene\_id "XLOC\_044109"; transcript\_id "TCONS\_00072817"; exon\_number "2"; oId "CUFF.75467.13"; tss\_id "TSS55382";

chr5 Cufflinks exon5421516 5422594 . - . gene\_id "XLOC\_044109"; transcript\_id "TCONS\_00072817"; exon\_number "3"; oId "CUFF.75467.13"; tss\_id "TSS55382";

chr5 Cufflinks exon5418027 5418224 . - . gene\_id "XLOC\_044109"; transcript\_id "TCONS\_00072821"; exon\_number "1"; oId "CUFF.75467.14"; tss\_id "TSS55382";

chr5 Cufflinks exon5420864 5420953 . - . gene\_id "XLOC\_044109"; transcript\_id "TCONS\_00072821"; exon\_number "2"; oId "CUFF.75467.14"; tss\_id "TSS55382";

chr5 Cufflinks exon5421516 5422594 . - . gene\_id "XLOC\_044109"; transcript\_id "TCONS\_00072821"; exon\_number "3"; oId "CUFF.75467.14"; tss\_id "TSS55382";

chr5 Cufflinks exon5418365 5420953 . - . gene\_id "XLOC\_044109"; transcript\_id "TCONS\_00072823"; exon\_number "1"; oId "CUFF.75467.16"; tss\_id "TSS55382";

chr5 Cufflinks exon5421516 5422594 . - . gene\_id "XLOC\_044109"; transcript\_id "TCONS\_00072823"; exon\_number "2"; oId "CUFF.75467.16"; tss\_id "TSS55382";

chr5 Cufflinks exon5418365 5418432 . - . gene\_id "XLOC\_044109"; transcript\_id "TCONS\_00072822"; exon\_number "1"; oId "CUFF.75467.15"; tss\_id "TSS55382";

chr5 Cufflinks exon5420864 5420953 . - . gene\_id "XLOC\_044109"; transcript\_id "TCONS\_00072822"; exon\_number "2"; oId "CUFF.75467.15"; tss\_id "TSS55382";

chr5 Cufflinks exon5421516 5422594 . - . gene\_id "XLOC\_044109"; transcript\_id "TCONS\_00072822"; exon\_number "3"; oId "CUFF.75467.15"; tss\_id "TSS55382";

chr5 Cufflinks exon10343082 10343431 . - . gene\_id "XLOC\_044161"; transcript\_id "TCONS\_00072874"; exon\_number "1"; oId "CUFF.75618.3"; tss\_id "TSS55443";

chr5 Cufflinks exon10351650 10351885 . - . gene\_id "XLOC\_044161"; transcript\_id "TCONS\_00072874"; exon\_number "2"; oId "CUFF.75618.3"; tss\_id "TSS55443";

chr5 Cufflinks exon10352209 10352629 . - . gene\_id "XLOC\_044161"; transcript\_id "TCONS\_00072874"; exon\_number "3"; oId "CUFF.75618.3"; tss\_id "TSS55443";

chr5 Cufflinks exon10343082 10343436 . - . gene\_id "XLOC\_044161"; transcript\_id "TCONS\_00072876"; exon\_number "1"; oId "CUFF.75618.2"; tss\_id "TSS55444";

chr5 Cufflinks exon10351650 10351885 . - . gene\_id "XLOC\_044161"; transcript\_id "TCONS\_00072876"; exon\_number "2"; oId "CUFF.75618.2"; tss\_id "TSS55444";

chr5 Cufflinks exon10352209 10353739 . - . gene\_id "XLOC\_044161"; transcript\_id "TCONS\_00072876"; exon\_number "3"; oId "CUFF.75618.2"; tss\_id "TSS55444";

chr5 Cufflinks exon10343082 10343436 . - . gene\_id "XLOC\_044161"; transcript\_id "TCONS\_00072875"; exon\_number "1";

|                                        |   |   |   |                                                                         |  |
|----------------------------------------|---|---|---|-------------------------------------------------------------------------|--|
| oId "CUFF.75618.1"; tss_id "TSS55444"; |   |   |   |                                                                         |  |
| chr5 Cufflinks exon10351650 10351888   | . | - | . | gene_id "XLOC_044161"; transcript_id "TCONS_00072875"; exon_number "2"; |  |
| oId "CUFF.75618.1"; tss_id "TSS55444"; |   |   |   |                                                                         |  |
| chr5 Cufflinks exon10352209 10353739   | . | - | . | gene_id "XLOC_044161"; transcript_id "TCONS_00072875"; exon_number "3"; |  |
| oId "CUFF.75618.1"; tss_id "TSS55444"; |   |   |   |                                                                         |  |
| chr5 Cufflinks exon10343082 10343436   | . | - | . | gene_id "XLOC_044161"; transcript_id "TCONS_00072877"; exon_number "1"; |  |
| oId "CUFF.75618.4"; tss_id "TSS55445"; |   |   |   |                                                                         |  |
| chr5 Cufflinks exon10351650 10351885   | . | - | . | gene_id "XLOC_044161"; transcript_id "TCONS_00072877"; exon_number "2"; |  |
| oId "CUFF.75618.4"; tss_id "TSS55445"; |   |   |   |                                                                         |  |
| chr5 Cufflinks exon10354084 10354276   | . | - | . | gene_id "XLOC_044161"; transcript_id "TCONS_00072877"; exon_number "3"; |  |
| oId "CUFF.75618.4"; tss_id "TSS55445"; |   |   |   |                                                                         |  |
| chr5 Cufflinks exon10348725 10349619   | . | - | . | gene_id "XLOC_044161"; transcript_id "TCONS_00072879"; exon_number "1"; |  |
| oId "CUFF.75618.5"; tss_id "TSS55444"; |   |   |   |                                                                         |  |
| chr5 Cufflinks exon10351650 10351885   | . | - | . | gene_id "XLOC_044161"; transcript_id "TCONS_00072879"; exon_number "2"; |  |
| oId "CUFF.75618.5"; tss_id "TSS55444"; |   |   |   |                                                                         |  |
| chr5 Cufflinks exon10352209 10353739   | . | - | . | gene_id "XLOC_044161"; transcript_id "TCONS_00072879"; exon_number "3"; |  |
| oId "CUFF.75618.5"; tss_id "TSS55444"; |   |   |   |                                                                         |  |
| chr5 Cufflinks exon10351031 10351174   | . | - | . | gene_id "XLOC_044161"; transcript_id "TCONS_00072880"; exon_number "1"; |  |
| oId "CUFF.75618.6"; tss_id "TSS55444"; |   |   |   |                                                                         |  |
| chr5 Cufflinks exon10351650 10351885   | . | - | . | gene_id "XLOC_044161"; transcript_id "TCONS_00072880"; exon_number "2"; |  |
| oId "CUFF.75618.6"; tss_id "TSS55444"; |   |   |   |                                                                         |  |
| chr5 Cufflinks exon10352858 10353739   | . | - | . | gene_id "XLOC_044161"; transcript_id "TCONS_00072880"; exon_number "3"; |  |
| oId "CUFF.75618.6"; tss_id "TSS55444"; |   |   |   |                                                                         |  |
| chr5 Cufflinks exon10351341 10351885   | . | - | . | gene_id "XLOC_044161"; transcript_id "TCONS_00072881"; exon_number "1"; |  |
| oId "CUFF.75618.8"; tss_id "TSS55443"; |   |   |   |                                                                         |  |
| chr5 Cufflinks exon10352209 10352629   | . | - | . | gene_id "XLOC_044161"; transcript_id "TCONS_00072881"; exon_number "2"; |  |
| oId "CUFF.75618.8"; tss_id "TSS55443"; |   |   |   |                                                                         |  |
| chr5 Cufflinks exon10351341 10351885   | . | - | . | gene_id "XLOC_044161"; transcript_id "TCONS_00072882"; exon_number "1"; |  |
| oId "CUFF.75618.7"; tss_id "TSS55445"; |   |   |   |                                                                         |  |
| chr5 Cufflinks exon10354084 10354211   | . | - | . | gene_id "XLOC_044161"; transcript_id "TCONS_00072882"; exon_number "2"; |  |
| oId "CUFF.75618.7"; tss_id "TSS55445"; |   |   |   |                                                                         |  |
| chr5 Cufflinks exon10493406 10493585   | . | - | . | gene_id "XLOC_044164"; transcript_id "TCONS_00072885"; exon_number "1"; |  |
| oId "CUFF.75623.2"; tss_id "TSS55448"; |   |   |   |                                                                         |  |
| chr5 Cufflinks exon10493975 10494204   | . | - | . | gene_id "XLOC_044164"; transcript_id "TCONS_00072885"; exon_number "2"; |  |
| oId "CUFF.75623.2"; tss_id "TSS55448"; |   |   |   |                                                                         |  |
| chr5 Cufflinks exon10495386 10495425   | . | - | . | gene_id "XLOC_044164"; transcript_id "TCONS_00072885"; exon_number "3"; |  |
| oId "CUFF.75623.2"; tss_id "TSS55448"; |   |   |   |                                                                         |  |
| chr5 Cufflinks exon10501317 10501490   | . | - | . | gene_id "XLOC_044164"; transcript_id "TCONS_00072885"; exon_number "4"; |  |
| oId "CUFF.75623.2"; tss_id "TSS55448"; |   |   |   |                                                                         |  |
| chr5 Cufflinks exon10502616 10502840   | . | - | . | gene_id "XLOC_044164"; transcript_id "TCONS_00072885"; exon_number "5"; |  |
| oId "CUFF.75623.2"; tss_id "TSS55448"; |   |   |   |                                                                         |  |
| chr5 Cufflinks exon10493406 10493585   | . | - | . | gene_id "XLOC_044164"; transcript_id "TCONS_00072884"; exon_number "1"; |  |
| oId "CUFF.75623.1"; tss_id "TSS55448"; |   |   |   |                                                                         |  |

|                                         |          |   |   |   |                                                                         |
|-----------------------------------------|----------|---|---|---|-------------------------------------------------------------------------|
| chr5 Cufflinks exon10493975             | 10494204 | . | - | . | gene_id "XLOC_044164"; transcript_id "TCONS_00072884"; exon_number "2"; |
| oId "CUFF.75623.1"; tss_id "TSS55448";  |          |   |   |   |                                                                         |
| chr5 Cufflinks exon10495386             | 10495425 | . | - | . | gene_id "XLOC_044164"; transcript_id "TCONS_00072884"; exon_number "3"; |
| oId "CUFF.75623.1"; tss_id "TSS55448";  |          |   |   |   |                                                                         |
| chr5 Cufflinks exon10501317             | 10502840 | . | - | . | gene_id "XLOC_044164"; transcript_id "TCONS_00072884"; exon_number "4"; |
| oId "CUFF.75623.1"; tss_id "TSS55448";  |          |   |   |   |                                                                         |
| chr5 Cufflinks exon34163569             | 34168580 | . | - | . | gene_id "XLOC_044224"; transcript_id "TCONS_00073028"; exon_number "1"; |
| oId "CUFF.75865.10"; tss_id "TSS55528"; |          |   |   |   |                                                                         |
| chr5 Cufflinks exon34169132             | 34169258 | . | - | . | gene_id "XLOC_044224"; transcript_id "TCONS_00073028"; exon_number "2"; |
| oId "CUFF.75865.10"; tss_id "TSS55528"; |          |   |   |   |                                                                         |
| chr5 Cufflinks exon34175927             | 34176062 | . | - | . | gene_id "XLOC_044224"; transcript_id "TCONS_00073028"; exon_number "3"; |
| oId "CUFF.75865.10"; tss_id "TSS55528"; |          |   |   |   |                                                                         |
| chr5 Cufflinks exon34179118             | 34179202 | . | - | . | gene_id "XLOC_044224"; transcript_id "TCONS_00073028"; exon_number "4"; |
| oId "CUFF.75865.10"; tss_id "TSS55528"; |          |   |   |   |                                                                         |
| chr5 Cufflinks exon34182785             | 34182972 | . | - | . | gene_id "XLOC_044224"; transcript_id "TCONS_00073028"; exon_number "5"; |
| oId "CUFF.75865.10"; tss_id "TSS55528"; |          |   |   |   |                                                                         |
| chr5 Cufflinks exon34218400             | 34218555 | . | - | . | gene_id "XLOC_044224"; transcript_id "TCONS_00073028"; exon_number "6"; |
| oId "CUFF.75865.10"; tss_id "TSS55528"; |          |   |   |   |                                                                         |
| chr5 Cufflinks exon34239480             | 34239522 | . | - | . | gene_id "XLOC_044224"; transcript_id "TCONS_00073028"; exon_number "7"; |
| oId "CUFF.75865.10"; tss_id "TSS55528"; |          |   |   |   |                                                                         |
| chr5 Cufflinks exon34163569             | 34168580 | . | - | . | gene_id "XLOC_044224"; transcript_id "TCONS_00073030"; exon_number "1"; |
| oId "CUFF.75865.9"; tss_id "TSS55529";  |          |   |   |   |                                                                         |
| chr5 Cufflinks exon34169132             | 34169258 | . | - | . | gene_id "XLOC_044224"; transcript_id "TCONS_00073030"; exon_number "2"; |
| oId "CUFF.75865.9"; tss_id "TSS55529";  |          |   |   |   |                                                                         |
| chr5 Cufflinks exon34175550             | 34175642 | . | - | . | gene_id "XLOC_044224"; transcript_id "TCONS_00073030"; exon_number "3"; |
| oId "CUFF.75865.9"; tss_id "TSS55529";  |          |   |   |   |                                                                         |
| chr5 Cufflinks exon34175927             | 34176062 | . | - | . | gene_id "XLOC_044224"; transcript_id "TCONS_00073030"; exon_number "4"; |
| oId "CUFF.75865.9"; tss_id "TSS55529";  |          |   |   |   |                                                                         |
| chr5 Cufflinks exon34179118             | 34179202 | . | - | . | gene_id "XLOC_044224"; transcript_id "TCONS_00073030"; exon_number "5"; |
| oId "CUFF.75865.9"; tss_id "TSS55529";  |          |   |   |   |                                                                         |
| chr5 Cufflinks exon34182785             | 34182972 | . | - | . | gene_id "XLOC_044224"; transcript_id "TCONS_00073030"; exon_number "6"; |
| oId "CUFF.75865.9"; tss_id "TSS55529";  |          |   |   |   |                                                                         |
| chr5 Cufflinks exon34218400             | 34218555 | . | - | . | gene_id "XLOC_044224"; transcript_id "TCONS_00073030"; exon_number "7"; |
| oId "CUFF.75865.9"; tss_id "TSS55529";  |          |   |   |   |                                                                         |
| chr5 Cufflinks exon34244721             | 34245286 | . | - | . | gene_id "XLOC_044224"; transcript_id "TCONS_00073030"; exon_number "8"; |
| oId "CUFF.75865.9"; tss_id "TSS55529";  |          |   |   |   |                                                                         |
| chr5 Cufflinks exon34163569             | 34169258 | . | - | . | gene_id "XLOC_044224"; transcript_id "TCONS_00073029"; exon_number "1"; |
| oId "CUFF.75865.8"; tss_id "TSS55529";  |          |   |   |   |                                                                         |
| chr5 Cufflinks exon34175550             | 34175642 | . | - | . | gene_id "XLOC_044224"; transcript_id "TCONS_00073029"; exon_number "2"; |
| oId "CUFF.75865.8"; tss_id "TSS55529";  |          |   |   |   |                                                                         |
| chr5 Cufflinks exon34175927             | 34176062 | . | - | . | gene_id "XLOC_044224"; transcript_id "TCONS_00073029"; exon_number "3"; |
| oId "CUFF.75865.8"; tss_id "TSS55529";  |          |   |   |   |                                                                         |
| chr5 Cufflinks exon34179118             | 34179202 | . | - | . | gene_id "XLOC_044224"; transcript_id "TCONS_00073029"; exon_number "4"; |

|                                        |   |   |   |                                                                         |  |
|----------------------------------------|---|---|---|-------------------------------------------------------------------------|--|
| oId "CUFF.75865.8"; tss_id "TSS55529"; |   |   |   |                                                                         |  |
| chr5 Cufflinks exon34182785 34182972   | . | - | . | gene_id "XLOC_044224"; transcript_id "TCONS_00073029"; exon_number "5"; |  |
| oId "CUFF.75865.8"; tss_id "TSS55529"; |   |   |   |                                                                         |  |
| chr5 Cufflinks exon34218400 34218555   | . | - | . | gene_id "XLOC_044224"; transcript_id "TCONS_00073029"; exon_number "6"; |  |
| oId "CUFF.75865.8"; tss_id "TSS55529"; |   |   |   |                                                                         |  |
| chr5 Cufflinks exon34244721 34245286   | . | - | . | gene_id "XLOC_044224"; transcript_id "TCONS_00073029"; exon_number "7"; |  |
| oId "CUFF.75865.8"; tss_id "TSS55529"; |   |   |   |                                                                         |  |
| chr5 Cufflinks exon34044387 34044667   | . | - | . | gene_id "XLOC_044229"; transcript_id "TCONS_00072996"; exon_number "1"; |  |
| oId "CUFF.75874.1"; tss_id "TSS55535"; |   |   |   |                                                                         |  |
| chr5 Cufflinks exon34044751 34046139   | . | - | . | gene_id "XLOC_044229"; transcript_id "TCONS_00072996"; exon_number "2"; |  |
| oId "CUFF.75874.1"; tss_id "TSS55535"; |   |   |   |                                                                         |  |
| chr5 Cufflinks exon36699521 36703066   | . | - | . | gene_id "XLOC_044289"; transcript_id "TCONS_00073071"; exon_number "1"; |  |
| oId "CUFF.76053.2"; tss_id "TSS55603"; |   |   |   |                                                                         |  |
| chr5 Cufflinks exon36705823 36705953   | . | - | . | gene_id "XLOC_044289"; transcript_id "TCONS_00073071"; exon_number "2"; |  |
| oId "CUFF.76053.2"; tss_id "TSS55603"; |   |   |   |                                                                         |  |
| chr5 Cufflinks exon36723727 36723810   | . | - | . | gene_id "XLOC_044289"; transcript_id "TCONS_00073071"; exon_number "3"; |  |
| oId "CUFF.76053.2"; tss_id "TSS55603"; |   |   |   |                                                                         |  |
| chr5 Cufflinks exon36699521 36703066   | . | - | . | gene_id "XLOC_044289"; transcript_id "TCONS_00073074"; exon_number "1"; |  |
| oId "CUFF.76053.4"; tss_id "TSS55604"; |   |   |   |                                                                         |  |
| chr5 Cufflinks exon36705823 36705955   | . | - | . | gene_id "XLOC_044289"; transcript_id "TCONS_00073074"; exon_number "2"; |  |
| oId "CUFF.76053.4"; tss_id "TSS55604"; |   |   |   |                                                                         |  |
| chr5 Cufflinks exon36725216 36725315   | . | - | . | gene_id "XLOC_044289"; transcript_id "TCONS_00073074"; exon_number "3"; |  |
| oId "CUFF.76053.4"; tss_id "TSS55604"; |   |   |   |                                                                         |  |
| chr5 Cufflinks exon36699521 36703066   | . | - | . | gene_id "XLOC_044289"; transcript_id "TCONS_00073073"; exon_number "1"; |  |
| oId "CUFF.76053.3"; tss_id "TSS55604"; |   |   |   |                                                                         |  |
| chr5 Cufflinks exon36705823 36705953   | . | - | . | gene_id "XLOC_044289"; transcript_id "TCONS_00073073"; exon_number "2"; |  |
| oId "CUFF.76053.3"; tss_id "TSS55604"; |   |   |   |                                                                         |  |
| chr5 Cufflinks exon36725216 36725315   | . | - | . | gene_id "XLOC_044289"; transcript_id "TCONS_00073073"; exon_number "3"; |  |
| oId "CUFF.76053.3"; tss_id "TSS55604"; |   |   |   |                                                                         |  |
| chr5 Cufflinks exon36699521 36703066   | . | - | . | gene_id "XLOC_044289"; transcript_id "TCONS_00073072"; exon_number "1"; |  |
| oId "CUFF.76053.1"; tss_id "TSS55604"; |   |   |   |                                                                         |  |
| chr5 Cufflinks exon36705782 36705953   | . | - | . | gene_id "XLOC_044289"; transcript_id "TCONS_00073072"; exon_number "2"; |  |
| oId "CUFF.76053.1"; tss_id "TSS55604"; |   |   |   |                                                                         |  |
| chr5 Cufflinks exon36725216 36725315   | . | - | . | gene_id "XLOC_044289"; transcript_id "TCONS_00073072"; exon_number "3"; |  |
| oId "CUFF.76053.1"; tss_id "TSS55604"; |   |   |   |                                                                         |  |
| chr5 Cufflinks exon40306913 40308727   | . | - | . | gene_id "XLOC_044310"; transcript_id "TCONS_00073123"; exon_number "1"; |  |
| oId "CUFF.76104.1"; tss_id "TSS55639"; |   |   |   |                                                                         |  |
| chr5 Cufflinks exon40309086 40309398   | . | - | . | gene_id "XLOC_044310"; transcript_id "TCONS_00073123"; exon_number "2"; |  |
| oId "CUFF.76104.1"; tss_id "TSS55639"; |   |   |   |                                                                         |  |
| chr5 Cufflinks exon40306913 40308727   | . | - | . | gene_id "XLOC_044310"; transcript_id "TCONS_00073124"; exon_number "1"; |  |
| oId "CUFF.76104.2"; tss_id "TSS55640"; |   |   |   |                                                                         |  |
| chr5 Cufflinks exon40327550 40327700   | . | - | . | gene_id "XLOC_044310"; transcript_id "TCONS_00073124"; exon_number "2"; |  |
| oId "CUFF.76104.2"; tss_id "TSS55640"; |   |   |   |                                                                         |  |



|                                        |          |   |   |   |                                                                         |
|----------------------------------------|----------|---|---|---|-------------------------------------------------------------------------|
| chr5 Cufflinks exon40306913            | 40308727 | . | - | . | gene_id "XLOC_044310"; transcript_id "TCONS_00073125"; exon_number "1"; |
| oId "CUFF.76104.3"; tss_id "TSS55640"; |          |   |   |   |                                                                         |
| chr5 Cufflinks exon40312970            | 40313094 | . | - | . | gene_id "XLOC_044310"; transcript_id "TCONS_00073125"; exon_number "2"; |
| oId "CUFF.76104.3"; tss_id "TSS55640"; |          |   |   |   |                                                                         |
| chr5 Cufflinks exon40327550            | 40327704 | . | - | . | gene_id "XLOC_044310"; transcript_id "TCONS_00073125"; exon_number "3"; |
| oId "CUFF.76104.3"; tss_id "TSS55640"; |          |   |   |   |                                                                         |
| chr5 Cufflinks exon40410286            | 40410705 | . | - | . | gene_id "XLOC_044312"; transcript_id "TCONS_00073128"; exon_number "1"; |
| oId "CUFF.76107.2"; tss_id "TSS55642"; |          |   |   |   |                                                                         |
| chr5 Cufflinks exon40434845            | 40434935 | . | - | . | gene_id "XLOC_044312"; transcript_id "TCONS_00073128"; exon_number "2"; |
| oId "CUFF.76107.2"; tss_id "TSS55642"; |          |   |   |   |                                                                         |
| chr5 Cufflinks exon40604034            | 40604138 | . | - | . | gene_id "XLOC_044312"; transcript_id "TCONS_00073128"; exon_number "3"; |
| oId "CUFF.76107.2"; tss_id "TSS55642"; |          |   |   |   |                                                                         |
| chr5 Cufflinks exon40605706            | 40605932 | . | - | . | gene_id "XLOC_044312"; transcript_id "TCONS_00073128"; exon_number "4"; |
| oId "CUFF.76107.2"; tss_id "TSS55642"; |          |   |   |   |                                                                         |
| chr5 Cufflinks exon40606016            | 40606150 | . | - | . | gene_id "XLOC_044312"; transcript_id "TCONS_00073128"; exon_number "5"; |
| oId "CUFF.76107.2"; tss_id "TSS55642"; |          |   |   |   |                                                                         |
| chr5 Cufflinks exon40410286            | 40410705 | . | - | . | gene_id "XLOC_044312"; transcript_id "TCONS_00073127"; exon_number "1"; |
| oId "CUFF.76107.1"; tss_id "TSS55642"; |          |   |   |   |                                                                         |
| chr5 Cufflinks exon40434845            | 40434935 | . | - | . | gene_id "XLOC_044312"; transcript_id "TCONS_00073127"; exon_number "2"; |
| oId "CUFF.76107.1"; tss_id "TSS55642"; |          |   |   |   |                                                                         |
| chr5 Cufflinks exon40511370            | 40511467 | . | - | . | gene_id "XLOC_044312"; transcript_id "TCONS_00073127"; exon_number "3"; |
| oId "CUFF.76107.1"; tss_id "TSS55642"; |          |   |   |   |                                                                         |
| chr5 Cufflinks exon40512950            | 40513171 | . | - | . | gene_id "XLOC_044312"; transcript_id "TCONS_00073127"; exon_number "4"; |
| oId "CUFF.76107.1"; tss_id "TSS55642"; |          |   |   |   |                                                                         |
| chr5 Cufflinks exon40604034            | 40604142 | . | - | . | gene_id "XLOC_044312"; transcript_id "TCONS_00073127"; exon_number "5"; |
| oId "CUFF.76107.1"; tss_id "TSS55642"; |          |   |   |   |                                                                         |
| chr5 Cufflinks exon40605706            | 40605932 | . | - | . | gene_id "XLOC_044312"; transcript_id "TCONS_00073127"; exon_number "6"; |
| oId "CUFF.76107.1"; tss_id "TSS55642"; |          |   |   |   |                                                                         |
| chr5 Cufflinks exon40606016            | 40606150 | . | - | . | gene_id "XLOC_044312"; transcript_id "TCONS_00073127"; exon_number "7"; |
| oId "CUFF.76107.1"; tss_id "TSS55642"; |          |   |   |   |                                                                         |
| chr5 Cufflinks exon40475242            | 40475890 | . | - | . | gene_id "XLOC_044312"; transcript_id "TCONS_00073129"; exon_number "1"; |
| oId "CUFF.76107.3"; tss_id "TSS55642"; |          |   |   |   |                                                                         |
| chr5 Cufflinks exon40488113            | 40488232 | . | - | . | gene_id "XLOC_044312"; transcript_id "TCONS_00073129"; exon_number "2"; |
| oId "CUFF.76107.3"; tss_id "TSS55642"; |          |   |   |   |                                                                         |
| chr5 Cufflinks exon40512950            | 40513171 | . | - | . | gene_id "XLOC_044312"; transcript_id "TCONS_00073129"; exon_number "3"; |
| oId "CUFF.76107.3"; tss_id "TSS55642"; |          |   |   |   |                                                                         |
| chr5 Cufflinks exon40576252            | 40576338 | . | - | . | gene_id "XLOC_044312"; transcript_id "TCONS_00073129"; exon_number "4"; |
| oId "CUFF.76107.3"; tss_id "TSS55642"; |          |   |   |   |                                                                         |
| chr5 Cufflinks exon40604034            | 40604138 | . | - | . | gene_id "XLOC_044312"; transcript_id "TCONS_00073129"; exon_number "5"; |
| oId "CUFF.76107.3"; tss_id "TSS55642"; |          |   |   |   |                                                                         |
| chr5 Cufflinks exon40605706            | 40605932 | . | - | . | gene_id "XLOC_044312"; transcript_id "TCONS_00073129"; exon_number "6"; |
| oId "CUFF.76107.3"; tss_id "TSS55642"; |          |   |   |   |                                                                         |
| chr5 Cufflinks exon40606016            | 40606150 | . | - | . | gene_id "XLOC_044312"; transcript_id "TCONS_00073129"; exon_number "7"; |

oId "CUFF.76107.3"; tss\_id "TSS55642";  
chr5 Cufflinks exon40512689 40513171 . - . gene\_id "XLOC\_044312"; transcript\_id "TCONS\_00073130"; exon\_number "1";  
oId "CUFF.76107.4"; tss\_id "TSS55643";  
chr5 Cufflinks exon40604034 40604138 . - . gene\_id "XLOC\_044312"; transcript\_id "TCONS\_00073130"; exon\_number "2";  
oId "CUFF.76107.4"; tss\_id "TSS55643";  
chr5 Cufflinks exon40605706 40605863 . - . gene\_id "XLOC\_044312"; transcript\_id "TCONS\_00073130"; exon\_number "3";  
oId "CUFF.76107.4"; tss\_id "TSS55643";  
chr5 Cufflinks exon40512689 40513171 . - . gene\_id "XLOC\_044312"; transcript\_id "TCONS\_00073131"; exon\_number "1";  
oId "CUFF.76107.5"; tss\_id "TSS55642";  
chr5 Cufflinks exon40604034 40604087 . - . gene\_id "XLOC\_044312"; transcript\_id "TCONS\_00073131"; exon\_number "2";  
oId "CUFF.76107.5"; tss\_id "TSS55642";  
chr5 Cufflinks exon40605706 40605932 . - . gene\_id "XLOC\_044312"; transcript\_id "TCONS\_00073131"; exon\_number "3";  
oId "CUFF.76107.5"; tss\_id "TSS55642";  
chr5 Cufflinks exon40606016 40606150 . - . gene\_id "XLOC\_044312"; transcript\_id "TCONS\_00073131"; exon\_number "4";  
oId "CUFF.76107.5"; tss\_id "TSS55642";  
chr5 Cufflinks exon40598227 40598237 . - . gene\_id "XLOC\_044312"; transcript\_id "TCONS\_00073132"; exon\_number "1";  
oId "CUFF.76107.6"; tss\_id "TSS55643";  
chr5 Cufflinks exon40604034 40604138 . - . gene\_id "XLOC\_044312"; transcript\_id "TCONS\_00073132"; exon\_number "2";  
oId "CUFF.76107.6"; tss\_id "TSS55643";  
chr5 Cufflinks exon40605706 40605873 . - . gene\_id "XLOC\_044312"; transcript\_id "TCONS\_00073132"; exon\_number "3";  
oId "CUFF.76107.6"; tss\_id "TSS55643";  
chr5 Cufflinks exon43029343 43029358 . - . gene\_id "XLOC\_044340"; transcript\_id "TCONS\_00073173"; exon\_number "1";  
oId "CUFF.76215.1"; tss\_id "TSS55676";  
chr5 Cufflinks exon43033967 43034492 . - . gene\_id "XLOC\_044340"; transcript\_id "TCONS\_00073173"; exon\_number "2";  
oId "CUFF.76215.1"; tss\_id "TSS55676";  
chr5 Cufflinks exon44744430 44745510 . - . gene\_id "XLOC\_044358"; transcript\_id "TCONS\_00073217"; exon\_number "1";  
oId "CUFF.76304.3"; tss\_id "TSS55705";  
chr5 Cufflinks exon44746044 44746140 . - . gene\_id "XLOC\_044358"; transcript\_id "TCONS\_00073217"; exon\_number "2";  
oId "CUFF.76304.3"; tss\_id "TSS55705";  
chr5 Cufflinks exon44808744 44808895 . - . gene\_id "XLOC\_044358"; transcript\_id "TCONS\_00073217"; exon\_number "3";  
oId "CUFF.76304.3"; tss\_id "TSS55705";  
chr5 Cufflinks exon44744430 44745506 . - . gene\_id "XLOC\_044358"; transcript\_id "TCONS\_00073218"; exon\_number "1";  
oId "CUFF.76304.4"; tss\_id "TSS55705";  
chr5 Cufflinks exon44746044 44746140 . - . gene\_id "XLOC\_044358"; transcript\_id "TCONS\_00073218"; exon\_number "2";  
oId "CUFF.76304.4"; tss\_id "TSS55705";  
chr5 Cufflinks exon44777139 44777203 . - . gene\_id "XLOC\_044358"; transcript\_id "TCONS\_00073218"; exon\_number "3";  
oId "CUFF.76304.4"; tss\_id "TSS55705";  
chr5 Cufflinks exon44808744 44808895 . - . gene\_id "XLOC\_044358"; transcript\_id "TCONS\_00073218"; exon\_number "4";  
oId "CUFF.76304.4"; tss\_id "TSS55705";  
chr5 Cufflinks exon44744430 44745510 . - . gene\_id "XLOC\_044358"; transcript\_id "TCONS\_00073216"; exon\_number "1";  
oId "CUFF.76304.2"; tss\_id "TSS55705";  
chr5 Cufflinks exon44746044 44746140 . - . gene\_id "XLOC\_044358"; transcript\_id "TCONS\_00073216"; exon\_number "2";  
oId "CUFF.76304.2"; tss\_id "TSS55705";

|                                        |          |   |   |   |                                                                         |
|----------------------------------------|----------|---|---|---|-------------------------------------------------------------------------|
| chr5 Cufflinks exon44777139            | 44777203 | . | - | . | gene_id "XLOC_044358"; transcript_id "TCONS_00073216"; exon_number "3"; |
| oId "CUFF.76304.2"; tss_id "TSS55705"; |          |   |   |   |                                                                         |
| chr5 Cufflinks exon44808744            | 44808895 | . | - | . | gene_id "XLOC_044358"; transcript_id "TCONS_00073216"; exon_number "4"; |
| oId "CUFF.76304.2"; tss_id "TSS55705"; |          |   |   |   |                                                                         |
| chr5 Cufflinks exon44744430            | 44745506 | . | - | . | gene_id "XLOC_044358"; transcript_id "TCONS_00073215"; exon_number "1"; |
| oId "CUFF.76304.1"; tss_id "TSS55705"; |          |   |   |   |                                                                         |
| chr5 Cufflinks exon44746044            | 44746140 | . | - | . | gene_id "XLOC_044358"; transcript_id "TCONS_00073215"; exon_number "2"; |
| oId "CUFF.76304.1"; tss_id "TSS55705"; |          |   |   |   |                                                                         |
| chr5 Cufflinks exon44808744            | 44808895 | . | - | . | gene_id "XLOC_044358"; transcript_id "TCONS_00073215"; exon_number "3"; |
| oId "CUFF.76304.1"; tss_id "TSS55705"; |          |   |   |   |                                                                         |
| chr5 Cufflinks exon68239589            | 68239863 | . | - | . | gene_id "XLOC_044466"; transcript_id "TCONS_00073384"; exon_number "1"; |
| oId "CUFF.76815.2"; tss_id "TSS55832"; |          |   |   |   |                                                                         |
| chr5 Cufflinks exon68256418            | 68256462 | . | - | . | gene_id "XLOC_044466"; transcript_id "TCONS_00073384"; exon_number "2"; |
| oId "CUFF.76815.2"; tss_id "TSS55832"; |          |   |   |   |                                                                         |
| chr5 Cufflinks exon74570356            | 74571330 | . | - | . | gene_id "XLOC_044528"; transcript_id "TCONS_00073501"; exon_number "1"; |
| oId "CUFF.77135.1"; tss_id "TSS55920"; |          |   |   |   |                                                                         |
| chr5 Cufflinks exon74630772            | 74630863 | . | - | . | gene_id "XLOC_044528"; transcript_id "TCONS_00073501"; exon_number "2"; |
| oId "CUFF.77135.1"; tss_id "TSS55920"; |          |   |   |   |                                                                         |
| chr5 Cufflinks exon74632367            | 74632685 | . | - | . | gene_id "XLOC_044528"; transcript_id "TCONS_00073501"; exon_number "3"; |
| oId "CUFF.77135.1"; tss_id "TSS55920"; |          |   |   |   |                                                                         |
| chr5 Cufflinks exon77649214            | 77655809 | . | - | . | gene_id "XLOC_044553"; transcript_id "TCONS_00073539"; exon_number "1"; |
| oId "CUFF.77272.2"; tss_id "TSS55951"; |          |   |   |   |                                                                         |
| chr5 Cufflinks exon77656038            | 77656365 | . | - | . | gene_id "XLOC_044553"; transcript_id "TCONS_00073539"; exon_number "2"; |
| oId "CUFF.77272.2"; tss_id "TSS55951"; |          |   |   |   |                                                                         |
| chr5 Cufflinks exon78412860            | 78412994 | . | - | . | gene_id "XLOC_044561"; transcript_id "TCONS_00073562"; exon_number "1"; |
| oId "CUFF.77289.2"; tss_id "TSS55968"; |          |   |   |   |                                                                         |
| chr5 Cufflinks exon78415060            | 78415161 | . | - | . | gene_id "XLOC_044561"; transcript_id "TCONS_00073562"; exon_number "2"; |
| oId "CUFF.77289.2"; tss_id "TSS55968"; |          |   |   |   |                                                                         |
| chr5 Cufflinks exon78416164            | 78416276 | . | - | . | gene_id "XLOC_044561"; transcript_id "TCONS_00073562"; exon_number "3"; |
| oId "CUFF.77289.2"; tss_id "TSS55968"; |          |   |   |   |                                                                         |
| chr5 Cufflinks exon78417026            | 78417175 | . | - | . | gene_id "XLOC_044561"; transcript_id "TCONS_00073562"; exon_number "4"; |
| oId "CUFF.77289.2"; tss_id "TSS55968"; |          |   |   |   |                                                                         |
| chr5 Cufflinks exon78419169            | 78419286 | . | - | . | gene_id "XLOC_044561"; transcript_id "TCONS_00073562"; exon_number "5"; |
| oId "CUFF.77289.2"; tss_id "TSS55968"; |          |   |   |   |                                                                         |
| chr5 Cufflinks exon78531634            | 78531837 | . | - | . | gene_id "XLOC_044561"; transcript_id "TCONS_00073562"; exon_number "6"; |
| oId "CUFF.77289.2"; tss_id "TSS55968"; |          |   |   |   |                                                                         |
| chr5 Cufflinks exon78412860            | 78412994 | . | - | . | gene_id "XLOC_044561"; transcript_id "TCONS_00073561"; exon_number "1"; |
| oId "CUFF.77289.1"; tss_id "TSS55968"; |          |   |   |   |                                                                         |
| chr5 Cufflinks exon78415060            | 78415198 | . | - | . | gene_id "XLOC_044561"; transcript_id "TCONS_00073561"; exon_number "2"; |
| oId "CUFF.77289.1"; tss_id "TSS55968"; |          |   |   |   |                                                                         |
| chr5 Cufflinks exon78416164            | 78416276 | . | - | . | gene_id "XLOC_044561"; transcript_id "TCONS_00073561"; exon_number "3"; |
| oId "CUFF.77289.1"; tss_id "TSS55968"; |          |   |   |   |                                                                         |
| chr5 Cufflinks exon78417026            | 78417175 | . | - | . | gene_id "XLOC_044561"; transcript_id "TCONS_00073561"; exon_number "4"; |

|                                        |   |   |   |                                                                         |  |
|----------------------------------------|---|---|---|-------------------------------------------------------------------------|--|
| oId "CUFF.77289.1"; tss_id "TSS55968"; |   |   |   |                                                                         |  |
| chr5 Cufflinks exon78531634 78531837   | . | - | . | gene_id "XLOC_044561"; transcript_id "TCONS_00073561"; exon_number "5"; |  |
| oId "CUFF.77289.1"; tss_id "TSS55968"; |   |   |   |                                                                         |  |
| chr5 Cufflinks exon78415162 78415198   | . | - | . | gene_id "XLOC_044561"; transcript_id "TCONS_00073563"; exon_number "1"; |  |
| oId "CUFF.77289.3"; tss_id "TSS55968"; |   |   |   |                                                                         |  |
| chr5 Cufflinks exon78416164 78416276   | . | - | . | gene_id "XLOC_044561"; transcript_id "TCONS_00073563"; exon_number "2"; |  |
| oId "CUFF.77289.3"; tss_id "TSS55968"; |   |   |   |                                                                         |  |
| chr5 Cufflinks exon78417026 78417175   | . | - | . | gene_id "XLOC_044561"; transcript_id "TCONS_00073563"; exon_number "3"; |  |
| oId "CUFF.77289.3"; tss_id "TSS55968"; |   |   |   |                                                                         |  |
| chr5 Cufflinks exon78419169 78419286   | . | - | . | gene_id "XLOC_044561"; transcript_id "TCONS_00073563"; exon_number "4"; |  |
| oId "CUFF.77289.3"; tss_id "TSS55968"; |   |   |   |                                                                         |  |
| chr5 Cufflinks exon78531634 78531781   | . | - | . | gene_id "XLOC_044561"; transcript_id "TCONS_00073563"; exon_number "5"; |  |
| oId "CUFF.77289.3"; tss_id "TSS55968"; |   |   |   |                                                                         |  |
| chr5 Cufflinks exon79912925 79916266   | . | - | . | gene_id "XLOC_044584"; transcript_id "TCONS_00073601"; exon_number "1"; |  |
| oId "CUFF.77369.1"; tss_id "TSS55999"; |   |   |   |                                                                         |  |
| chr5 Cufflinks exon79917148 79917252   | . | - | . | gene_id "XLOC_044584"; transcript_id "TCONS_00073601"; exon_number "2"; |  |
| oId "CUFF.77369.1"; tss_id "TSS55999"; |   |   |   |                                                                         |  |
| chr5 Cufflinks exon80525000 80531941   | . | - | . | gene_id "XLOC_044587"; transcript_id "TCONS_00073606"; exon_number "1"; |  |
| oId "CUFF.77382.3"; tss_id "TSS56002"; |   |   |   |                                                                         |  |
| chr5 Cufflinks exon80534280 80535174   | . | - | . | gene_id "XLOC_044587"; transcript_id "TCONS_00073606"; exon_number "2"; |  |
| oId "CUFF.77382.3"; tss_id "TSS56002"; |   |   |   |                                                                         |  |
| chr5 Cufflinks exon80597106 80597388   | . | - | . | gene_id "XLOC_044587"; transcript_id "TCONS_00073606"; exon_number "3"; |  |
| oId "CUFF.77382.3"; tss_id "TSS56002"; |   |   |   |                                                                         |  |
| chr5 Cufflinks exon80525000 80531941   | . | - | . | gene_id "XLOC_044587"; transcript_id "TCONS_00073605"; exon_number "1"; |  |
| oId "CUFF.77382.2"; tss_id "TSS56002"; |   |   |   |                                                                         |  |
| chr5 Cufflinks exon80542709 80542791   | . | - | . | gene_id "XLOC_044587"; transcript_id "TCONS_00073605"; exon_number "2"; |  |
| oId "CUFF.77382.2"; tss_id "TSS56002"; |   |   |   |                                                                         |  |
| chr5 Cufflinks exon80546522 80546608   | . | - | . | gene_id "XLOC_044587"; transcript_id "TCONS_00073605"; exon_number "3"; |  |
| oId "CUFF.77382.2"; tss_id "TSS56002"; |   |   |   |                                                                         |  |
| chr5 Cufflinks exon80597106 80597388   | . | - | . | gene_id "XLOC_044587"; transcript_id "TCONS_00073605"; exon_number "4"; |  |
| oId "CUFF.77382.2"; tss_id "TSS56002"; |   |   |   |                                                                         |  |
| chr5 Cufflinks exon80525000 80531941   | . | - | . | gene_id "XLOC_044587"; transcript_id "TCONS_00073604"; exon_number "1"; |  |
| oId "CUFF.77382.1"; tss_id "TSS56002"; |   |   |   |                                                                         |  |
| chr5 Cufflinks exon80597235 80597388   | . | - | . | gene_id "XLOC_044587"; transcript_id "TCONS_00073604"; exon_number "2"; |  |
| oId "CUFF.77382.1"; tss_id "TSS56002"; |   |   |   |                                                                         |  |
| chr5 Cufflinks exon80533384 80535174   | . | - | . | gene_id "XLOC_044587"; transcript_id "TCONS_00073608"; exon_number "1"; |  |
| oId "CUFF.77382.6"; tss_id "TSS56002"; |   |   |   |                                                                         |  |
| chr5 Cufflinks exon80597106 80597388   | . | - | . | gene_id "XLOC_044587"; transcript_id "TCONS_00073608"; exon_number "2"; |  |
| oId "CUFF.77382.6"; tss_id "TSS56002"; |   |   |   |                                                                         |  |
| chr5 Cufflinks exon80533384 80535179   | . | - | . | gene_id "XLOC_044587"; transcript_id "TCONS_00073607"; exon_number "1"; |  |
| oId "CUFF.77382.4"; tss_id "TSS56002"; |   |   |   |                                                                         |  |
| chr5 Cufflinks exon80542709 80542791   | . | - | . | gene_id "XLOC_044587"; transcript_id "TCONS_00073607"; exon_number "2"; |  |
| oId "CUFF.77382.4"; tss_id "TSS56002"; |   |   |   |                                                                         |  |

|                                        |          |   |   |   |                                                                         |
|----------------------------------------|----------|---|---|---|-------------------------------------------------------------------------|
| chr5 Cufflinks exon80546522            | 80546608 | . | - | . | gene_id "XLOC_044587"; transcript_id "TCONS_00073607"; exon_number "3"; |
| oId "CUFF.77382.4"; tss_id "TSS56002"; |          |   |   |   |                                                                         |
| chr5 Cufflinks exon80597106            | 80597388 | . | - | . | gene_id "XLOC_044587"; transcript_id "TCONS_00073607"; exon_number "4"; |
| oId "CUFF.77382.4"; tss_id "TSS56002"; |          |   |   |   |                                                                         |
| chr5 Cufflinks exon82307170            | 82308115 | . | - | . | gene_id "XLOC_044608"; transcript_id "TCONS_00073638"; exon_number "1"; |
| oId "CUFF.77691.3"; tss_id "TSS56024"; |          |   |   |   |                                                                         |
| chr5 Cufflinks exon82308365            | 82308489 | . | - | . | gene_id "XLOC_044608"; transcript_id "TCONS_00073638"; exon_number "2"; |
| oId "CUFF.77691.3"; tss_id "TSS56024"; |          |   |   |   |                                                                         |
| chr5 Cufflinks exon82316444            | 82316525 | . | - | . | gene_id "XLOC_044608"; transcript_id "TCONS_00073638"; exon_number "3"; |
| oId "CUFF.77691.3"; tss_id "TSS56024"; |          |   |   |   |                                                                         |
| chr5 Cufflinks exon82318837            | 82319264 | . | - | . | gene_id "XLOC_044608"; transcript_id "TCONS_00073638"; exon_number "4"; |
| oId "CUFF.77691.3"; tss_id "TSS56024"; |          |   |   |   |                                                                         |
| chr5 Cufflinks exon82340382            | 82342372 | . | - | . | gene_id "XLOC_044608"; transcript_id "TCONS_00073638"; exon_number "5"; |
| oId "CUFF.77691.3"; tss_id "TSS56024"; |          |   |   |   |                                                                         |
| chr5 Cufflinks exon82307170            | 82308489 | . | - | . | gene_id "XLOC_044608"; transcript_id "TCONS_00073639"; exon_number "1"; |
| oId "CUFF.77691.4"; tss_id "TSS56024"; |          |   |   |   |                                                                         |
| chr5 Cufflinks exon82318837            | 82319264 | . | - | . | gene_id "XLOC_044608"; transcript_id "TCONS_00073639"; exon_number "2"; |
| oId "CUFF.77691.4"; tss_id "TSS56024"; |          |   |   |   |                                                                         |
| chr5 Cufflinks exon82340382            | 82342372 | . | - | . | gene_id "XLOC_044608"; transcript_id "TCONS_00073639"; exon_number "3"; |
| oId "CUFF.77691.4"; tss_id "TSS56024"; |          |   |   |   |                                                                         |
| chr5 Cufflinks exon82307170            | 82308115 | . | - | . | gene_id "XLOC_044608"; transcript_id "TCONS_00073637"; exon_number "1"; |
| oId "CUFF.77691.2"; tss_id "TSS56024"; |          |   |   |   |                                                                         |
| chr5 Cufflinks exon82312058            | 82312169 | . | - | . | gene_id "XLOC_044608"; transcript_id "TCONS_00073637"; exon_number "2"; |
| oId "CUFF.77691.2"; tss_id "TSS56024"; |          |   |   |   |                                                                         |
| chr5 Cufflinks exon82316444            | 82319264 | . | - | . | gene_id "XLOC_044608"; transcript_id "TCONS_00073637"; exon_number "3"; |
| oId "CUFF.77691.2"; tss_id "TSS56024"; |          |   |   |   |                                                                         |
| chr5 Cufflinks exon82340382            | 82342372 | . | - | . | gene_id "XLOC_044608"; transcript_id "TCONS_00073637"; exon_number "4"; |
| oId "CUFF.77691.2"; tss_id "TSS56024"; |          |   |   |   |                                                                         |
| chr5 Cufflinks exon82307170            | 82308115 | . | - | . | gene_id "XLOC_044608"; transcript_id "TCONS_00073636"; exon_number "1"; |
| oId "CUFF.77691.1"; tss_id "TSS56024"; |          |   |   |   |                                                                         |
| chr5 Cufflinks exon82308365            | 82308489 | . | - | . | gene_id "XLOC_044608"; transcript_id "TCONS_00073636"; exon_number "2"; |
| oId "CUFF.77691.1"; tss_id "TSS56024"; |          |   |   |   |                                                                         |
| chr5 Cufflinks exon82312058            | 82312169 | . | - | . | gene_id "XLOC_044608"; transcript_id "TCONS_00073636"; exon_number "3"; |
| oId "CUFF.77691.1"; tss_id "TSS56024"; |          |   |   |   |                                                                         |
| chr5 Cufflinks exon82316444            | 82316525 | . | - | . | gene_id "XLOC_044608"; transcript_id "TCONS_00073636"; exon_number "4"; |
| oId "CUFF.77691.1"; tss_id "TSS56024"; |          |   |   |   |                                                                         |
| chr5 Cufflinks exon82318837            | 82319264 | . | - | . | gene_id "XLOC_044608"; transcript_id "TCONS_00073636"; exon_number "5"; |
| oId "CUFF.77691.1"; tss_id "TSS56024"; |          |   |   |   |                                                                         |
| chr5 Cufflinks exon82340382            | 82342372 | . | - | . | gene_id "XLOC_044608"; transcript_id "TCONS_00073636"; exon_number "6"; |
| oId "CUFF.77691.1"; tss_id "TSS56024"; |          |   |   |   |                                                                         |
| chr5 Cufflinks exon82310719            | 82312169 | . | - | . | gene_id "XLOC_044608"; transcript_id "TCONS_00073641"; exon_number "1"; |
| oId "CUFF.77691.5"; tss_id "TSS56024"; |          |   |   |   |                                                                         |
| chr5 Cufflinks exon82316444            | 82316525 | . | - | . | gene_id "XLOC_044608"; transcript_id "TCONS_00073641"; exon_number "2"; |

oId "CUFF.77691.5"; tss\_id "TSS56024";  
chr5 Cufflinks exon82318837 82319264 . - . gene\_id "XLOC\_044608"; transcript\_id "TCONS\_00073641"; exon\_number "3";  
oId "CUFF.77691.5"; tss\_id "TSS56024";  
chr5 Cufflinks exon82340382 82342372 . - . gene\_id "XLOC\_044608"; transcript\_id "TCONS\_00073641"; exon\_number "4";  
oId "CUFF.77691.5"; tss\_id "TSS56024";  
chr5 Cufflinks exon82317500 82317554 . - . gene\_id "XLOC\_044608"; transcript\_id "TCONS\_00073644"; exon\_number "1";  
oId "CUFF.77691.6"; tss\_id "TSS56024";  
chr5 Cufflinks exon82318837 82319264 . - . gene\_id "XLOC\_044608"; transcript\_id "TCONS\_00073644"; exon\_number "2";  
oId "CUFF.77691.6"; tss\_id "TSS56024";  
chr5 Cufflinks exon82340382 82342372 . - . gene\_id "XLOC\_044608"; transcript\_id "TCONS\_00073644"; exon\_number "3";  
oId "CUFF.77691.6"; tss\_id "TSS56024";  
chr5 Cufflinks exon87836597 87836941 . - . gene\_id "XLOC\_044639"; transcript\_id "TCONS\_00073678"; exon\_number "1";  
oId "CUFF.77800.1"; tss\_id "TSS56059";  
chr5 Cufflinks exon87837853 87837888 . - . gene\_id "XLOC\_044639"; transcript\_id "TCONS\_00073678"; exon\_number "2";  
oId "CUFF.77800.1"; tss\_id "TSS56059";  
chr5 Cufflinks exon87966854 87966903 . - . gene\_id "XLOC\_044639"; transcript\_id "TCONS\_00073678"; exon\_number "3";  
oId "CUFF.77800.1"; tss\_id "TSS56059";  
chr5 Cufflinks exon87968783 87968846 . - . gene\_id "XLOC\_044639"; transcript\_id "TCONS\_00073678"; exon\_number "4";  
oId "CUFF.77800.1"; tss\_id "TSS56059";  
chr5 Cufflinks exon87980475 87980620 . - . gene\_id "XLOC\_044639"; transcript\_id "TCONS\_00073678"; exon\_number "5";  
oId "CUFF.77800.1"; tss\_id "TSS56059";  
chr5 Cufflinks exon87959210 87963409 . - . gene\_id "XLOC\_044639"; transcript\_id "TCONS\_00073679"; exon\_number "1";  
oId "CUFF.77800.2"; tss\_id "TSS56060";  
chr5 Cufflinks exon87966854 87966903 . - . gene\_id "XLOC\_044639"; transcript\_id "TCONS\_00073679"; exon\_number "2";  
oId "CUFF.77800.2"; tss\_id "TSS56060";  
chr5 Cufflinks exon87968783 87971674 . - . gene\_id "XLOC\_044639"; transcript\_id "TCONS\_00073679"; exon\_number "3";  
oId "CUFF.77800.2"; tss\_id "TSS56060";  
chr5 Cufflinks exon87959210 87963409 . - . gene\_id "XLOC\_044639"; transcript\_id "TCONS\_00073680"; exon\_number "1";  
oId "CUFF.77800.3"; tss\_id "TSS56061";  
chr5 Cufflinks exon87966854 87966903 . - . gene\_id "XLOC\_044639"; transcript\_id "TCONS\_00073680"; exon\_number "2";  
oId "CUFF.77800.3"; tss\_id "TSS56061";  
chr5 Cufflinks exon87968783 87968846 . - . gene\_id "XLOC\_044639"; transcript\_id "TCONS\_00073680"; exon\_number "3";  
oId "CUFF.77800.3"; tss\_id "TSS56061";  
chr5 Cufflinks exon87974165 87974262 . - . gene\_id "XLOC\_044639"; transcript\_id "TCONS\_00073680"; exon\_number "4";  
oId "CUFF.77800.3"; tss\_id "TSS56061";  
chr5 Cufflinks exon90597351 90598978 . - . gene\_id "XLOC\_044656"; transcript\_id "TCONS\_00073705"; exon\_number "1";  
oId "CUFF.77837.1"; tss\_id "TSS56081";  
chr5 Cufflinks exon90606374 90608221 . - . gene\_id "XLOC\_044656"; transcript\_id "TCONS\_00073705"; exon\_number "2";  
oId "CUFF.77837.1"; tss\_id "TSS56081";  
chr5 Cufflinks exon90608895 90609046 . - . gene\_id "XLOC\_044656"; transcript\_id "TCONS\_00073705"; exon\_number "3";  
oId "CUFF.77837.1"; tss\_id "TSS56081";  
chr5 Cufflinks exon90609455 90609594 . - . gene\_id "XLOC\_044656"; transcript\_id "TCONS\_00073705"; exon\_number "4";  
oId "CUFF.77837.1"; tss\_id "TSS56081";

|                                         |          |   |   |   |                                                                         |
|-----------------------------------------|----------|---|---|---|-------------------------------------------------------------------------|
| chr5 Cufflinks exon90609897             | 90610293 | . | - | . | gene_id "XLOC_044656"; transcript_id "TCONS_00073705"; exon_number "5"; |
| oId "CUFF.77837.1"; tss_id "TSS56081";  |          |   |   |   |                                                                         |
| chr5 Cufflinks exon90601580             | 90608230 | . | - | . | gene_id "XLOC_044656"; transcript_id "TCONS_00073706"; exon_number "1"; |
| oId "CUFF.77837.7"; tss_id "TSS56082";  |          |   |   |   |                                                                         |
| chr5 Cufflinks exon90608895             | 90609116 | . | - | . | gene_id "XLOC_044656"; transcript_id "TCONS_00073706"; exon_number "2"; |
| oId "CUFF.77837.7"; tss_id "TSS56082";  |          |   |   |   |                                                                         |
| chr5 Cufflinks exon90601580             | 90606854 | . | - | . | gene_id "XLOC_044656"; transcript_id "TCONS_00073707"; exon_number "1"; |
| oId "CUFF.77837.10"; tss_id "TSS56083"; |          |   |   |   |                                                                         |
| chr5 Cufflinks exon90608895             | 90609244 | . | - | . | gene_id "XLOC_044656"; transcript_id "TCONS_00073707"; exon_number "2"; |
| oId "CUFF.77837.10"; tss_id "TSS56083"; |          |   |   |   |                                                                         |
| chr5 Cufflinks exon90601580             | 90609574 | . | - | . | gene_id "XLOC_044656"; transcript_id "TCONS_00073708"; exon_number "1"; |
| oId "CUFF.77837.9"; tss_id "TSS56081";  |          |   |   |   |                                                                         |
| chr5 Cufflinks exon90609897             | 90610262 | . | - | . | gene_id "XLOC_044656"; transcript_id "TCONS_00073708"; exon_number "2"; |
| oId "CUFF.77837.9"; tss_id "TSS56081";  |          |   |   |   |                                                                         |
| chr5 Cufflinks exon90601580             | 90609046 | . | - | . | gene_id "XLOC_044656"; transcript_id "TCONS_00073710"; exon_number "1"; |
| oId "CUFF.77837.8"; tss_id "TSS56081";  |          |   |   |   |                                                                         |
| chr5 Cufflinks exon90609455             | 90609594 | . | - | . | gene_id "XLOC_044656"; transcript_id "TCONS_00073710"; exon_number "2"; |
| oId "CUFF.77837.8"; tss_id "TSS56081";  |          |   |   |   |                                                                         |
| chr5 Cufflinks exon90609897             | 90610264 | . | - | . | gene_id "XLOC_044656"; transcript_id "TCONS_00073710"; exon_number "3"; |
| oId "CUFF.77837.8"; tss_id "TSS56081";  |          |   |   |   |                                                                         |
| chr5 Cufflinks exon90601580             | 90606005 | . | - | . | gene_id "XLOC_044656"; transcript_id "TCONS_00073709"; exon_number "1"; |
| oId "CUFF.77837.11"; tss_id "TSS56081"; |          |   |   |   |                                                                         |
| chr5 Cufflinks exon90608895             | 90609047 | . | - | . | gene_id "XLOC_044656"; transcript_id "TCONS_00073709"; exon_number "2"; |
| oId "CUFF.77837.11"; tss_id "TSS56081"; |          |   |   |   |                                                                         |
| chr5 Cufflinks exon90609456             | 90609598 | . | - | . | gene_id "XLOC_044656"; transcript_id "TCONS_00073709"; exon_number "3"; |
| oId "CUFF.77837.11"; tss_id "TSS56081"; |          |   |   |   |                                                                         |
| chr5 Cufflinks exon90609897             | 90610264 | . | - | . | gene_id "XLOC_044656"; transcript_id "TCONS_00073709"; exon_number "4"; |
| oId "CUFF.77837.11"; tss_id "TSS56081"; |          |   |   |   |                                                                         |
| chr5 Cufflinks exon90601580             | 90606849 | . | - | . | gene_id "XLOC_044656"; transcript_id "TCONS_00073711"; exon_number "1"; |
| oId "CUFF.77837.6"; tss_id "TSS56081";  |          |   |   |   |                                                                         |
| chr5 Cufflinks exon90609455             | 90609594 | . | - | . | gene_id "XLOC_044656"; transcript_id "TCONS_00073711"; exon_number "2"; |
| oId "CUFF.77837.6"; tss_id "TSS56081";  |          |   |   |   |                                                                         |
| chr5 Cufflinks exon90609897             | 90610268 | . | - | . | gene_id "XLOC_044656"; transcript_id "TCONS_00073711"; exon_number "3"; |
| oId "CUFF.77837.6"; tss_id "TSS56081";  |          |   |   |   |                                                                         |
| chr5 Cufflinks exon90601580             | 90607554 | . | - | . | gene_id "XLOC_044656"; transcript_id "TCONS_00073712"; exon_number "1"; |
| oId "CUFF.77837.2"; tss_id "TSS56081";  |          |   |   |   |                                                                         |
| chr5 Cufflinks exon90608112             | 90608230 | . | - | . | gene_id "XLOC_044656"; transcript_id "TCONS_00073712"; exon_number "2"; |
| oId "CUFF.77837.2"; tss_id "TSS56081";  |          |   |   |   |                                                                         |
| chr5 Cufflinks exon90608895             | 90609046 | . | - | . | gene_id "XLOC_044656"; transcript_id "TCONS_00073712"; exon_number "3"; |
| oId "CUFF.77837.2"; tss_id "TSS56081";  |          |   |   |   |                                                                         |
| chr5 Cufflinks exon90609455             | 90609594 | . | - | . | gene_id "XLOC_044656"; transcript_id "TCONS_00073712"; exon_number "4"; |
| oId "CUFF.77837.2"; tss_id "TSS56081";  |          |   |   |   |                                                                         |
| chr5 Cufflinks exon90609897             | 90610293 | . | - | . | gene_id "XLOC_044656"; transcript_id "TCONS_00073712"; exon_number "5"; |

oId "CUFF.77837.2"; tss\_id "TSS56081";  
chr5 Cufflinks exon90601580 90606849 . - . gene\_id "XLOC\_044656"; transcript\_id "TCONS\_00073715"; exon\_number "1";  
oId "CUFF.77837.5"; tss\_id "TSS56081";  
chr5 Cufflinks exon90608112 90608230 . - . gene\_id "XLOC\_044656"; transcript\_id "TCONS\_00073715"; exon\_number "2";  
oId "CUFF.77837.5"; tss\_id "TSS56081";  
chr5 Cufflinks exon90608895 90609046 . - . gene\_id "XLOC\_044656"; transcript\_id "TCONS\_00073715"; exon\_number "3";  
oId "CUFF.77837.5"; tss\_id "TSS56081";  
chr5 Cufflinks exon90609455 90609594 . - . gene\_id "XLOC\_044656"; transcript\_id "TCONS\_00073715"; exon\_number "4";  
oId "CUFF.77837.5"; tss\_id "TSS56081";  
chr5 Cufflinks exon90609897 90610302 . - . gene\_id "XLOC\_044656"; transcript\_id "TCONS\_00073715"; exon\_number "5";  
oId "CUFF.77837.5"; tss\_id "TSS56081";  
chr5 Cufflinks exon90601580 90608312 . - . gene\_id "XLOC\_044656"; transcript\_id "TCONS\_00073714"; exon\_number "1";  
oId "CUFF.77837.4"; tss\_id "TSS56081";  
chr5 Cufflinks exon90608895 90609046 . - . gene\_id "XLOC\_044656"; transcript\_id "TCONS\_00073714"; exon\_number "2";  
oId "CUFF.77837.4"; tss\_id "TSS56081";  
chr5 Cufflinks exon90609455 90609594 . - . gene\_id "XLOC\_044656"; transcript\_id "TCONS\_00073714"; exon\_number "3";  
oId "CUFF.77837.4"; tss\_id "TSS56081";  
chr5 Cufflinks exon90609897 90610302 . - . gene\_id "XLOC\_044656"; transcript\_id "TCONS\_00073714"; exon\_number "4";  
oId "CUFF.77837.4"; tss\_id "TSS56081";  
chr5 Cufflinks exon90601580 90606849 . - . gene\_id "XLOC\_044656"; transcript\_id "TCONS\_00073713"; exon\_number "1";  
oId "CUFF.77837.3"; tss\_id "TSS56081";  
chr5 Cufflinks exon90608895 90609046 . - . gene\_id "XLOC\_044656"; transcript\_id "TCONS\_00073713"; exon\_number "2";  
oId "CUFF.77837.3"; tss\_id "TSS56081";  
chr5 Cufflinks exon90609455 90609594 . - . gene\_id "XLOC\_044656"; transcript\_id "TCONS\_00073713"; exon\_number "3";  
oId "CUFF.77837.3"; tss\_id "TSS56081";  
chr5 Cufflinks exon90609897 90610302 . - . gene\_id "XLOC\_044656"; transcript\_id "TCONS\_00073713"; exon\_number "4";  
oId "CUFF.77837.3"; tss\_id "TSS56081";  
chr5 Cufflinks exon111031497 111035023 . - . gene\_id "XLOC\_044758"; transcript\_id "TCONS\_00073879"; exon\_number "1";  
oId "CUFF.78365.2"; tss\_id "TSS56209";  
chr5 Cufflinks exon111037744 111038024 . - . gene\_id "XLOC\_044758"; transcript\_id "TCONS\_00073879"; exon\_number "2";  
oId "CUFF.78365.2"; tss\_id "TSS56209";  
chr5 Cufflinks exon127357244 127359990 . - . gene\_id "XLOC\_044867"; transcript\_id "TCONS\_00074034"; exon\_number "1";  
oId "CUFF.78754.4"; tss\_id "TSS56338";  
chr5 Cufflinks exon127396836 127396936 . - . gene\_id "XLOC\_044867"; transcript\_id "TCONS\_00074034"; exon\_number "2";  
oId "CUFF.78754.4"; tss\_id "TSS56338";  
chr5 Cufflinks exon127418662 127418766 . - . gene\_id "XLOC\_044867"; transcript\_id "TCONS\_00074034"; exon\_number "3";  
oId "CUFF.78754.4"; tss\_id "TSS56338";  
chr5 Cufflinks exon128793994 128795774 . - . gene\_id "XLOC\_044874"; transcript\_id "TCONS\_00074041"; exon\_number "1";  
oId "CUFF.78830.2"; tss\_id "TSS56345";  
chr5 Cufflinks exon128796120 128797169 . - . gene\_id "XLOC\_044874"; transcript\_id "TCONS\_00074041"; exon\_number "2";  
oId "CUFF.78830.2"; tss\_id "TSS56345";  
chr5 Cufflinks exon128793994 128795772 . - . gene\_id "XLOC\_044874"; transcript\_id "TCONS\_00074042"; exon\_number "1";  
oId "CUFF.78830.3"; tss\_id "TSS56346";



chr5 Cufflinks exon128796118 128796432 . - . gene\_id "XLOC\_044874"; transcript\_id "TCONS\_00074042"; exon\_number "2";  
oId "CUFF.78830.3"; tss\_id "TSS56346";

chr5 Cufflinks exon128797253 128797318 . - . gene\_id "XLOC\_044874"; transcript\_id "TCONS\_00074042"; exon\_number "3";  
oId "CUFF.78830.3"; tss\_id "TSS56346";

chr5 Cufflinks exon128793994 128795772 . - . gene\_id "XLOC\_044874"; transcript\_id "TCONS\_00074043"; exon\_number "1";  
oId "CUFF.78830.1"; tss\_id "TSS56346";

chr5 Cufflinks exon128796118 128796432 . - . gene\_id "XLOC\_044874"; transcript\_id "TCONS\_00074043"; exon\_number "2";  
oId "CUFF.78830.1"; tss\_id "TSS56346";

chr5 Cufflinks exon 128796600 128797345 . - . gene\_id "XLOC\_044874"; transcript\_id "TCONS\_00074043";  
exon\_number "3"; oId "CUFF.78830.1"; tss\_id "TSS56346";

chr5 Cufflinks exon 130597035 130597545 . - . gene\_id "XLOC\_044876"; transcript\_id "TCONS\_00074045";  
exon\_number "1"; oId "CUFF.78870.1"; tss\_id "TSS56348";

chr5 Cufflinks exon 130599333 130599598 . - . gene\_id "XLOC\_044876"; transcript\_id "TCONS\_00074045";  
exon\_number "2"; oId "CUFF.78870.1"; tss\_id "TSS56348";

chr5 Cufflinks exon 133423647 133431005 . - . gene\_id "XLOC\_044916"; transcript\_id "TCONS\_00074123";  
exon\_number "1"; oId "CUFF.79010.1"; tss\_id "TSS56406";

chr5 Cufflinks exon 133440002 133441150 . - . gene\_id "XLOC\_044916"; transcript\_id "TCONS\_00074123";  
exon\_number "2"; oId "CUFF.79010.1"; tss\_id "TSS56406";

chr5 Cufflinks exon 133438422 133440204 . - . gene\_id "XLOC\_044916"; transcript\_id "TCONS\_00074126";  
exon\_number "1"; oId "CUFF.79010.3"; tss\_id "TSS56406";

chr5 Cufflinks exon 133440412 133441147 . - . gene\_id "XLOC\_044916"; transcript\_id "TCONS\_00074126";  
exon\_number "2"; oId "CUFF.79010.3"; tss\_id "TSS56406";

chr5 Cufflinks exon 133441826 133444902 . - . gene\_id "XLOC\_044919"; transcript\_id "TCONS\_00074130";  
exon\_number "1"; oId "CUFF.79013.2"; tss\_id "TSS56411";

chr5 Cufflinks exon 133448516 133448635 . - . gene\_id "XLOC\_044919"; transcript\_id "TCONS\_00074130";  
exon\_number "2"; oId "CUFF.79013.2"; tss\_id "TSS56411";

chr5 Cufflinks exon 133441826 133444894 . - . gene\_id "XLOC\_044919"; transcript\_id "TCONS\_00074129";  
exon\_number "1"; oId "CUFF.79013.1"; tss\_id "TSS56411";

chr5 Cufflinks exon 133448508 133448635 . - . gene\_id "XLOC\_044919"; transcript\_id "TCONS\_00074129";  
exon\_number "2"; oId "CUFF.79013.1"; tss\_id "TSS56411";

chr5 Cufflinks exon 133441826 133442574 . - . gene\_id "XLOC\_044919"; transcript\_id "TCONS\_00074131";  
exon\_number "1"; oId "CUFF.79013.4"; tss\_id "TSS56412";

chr5 Cufflinks exon 133442828 133443198 . - . gene\_id "XLOC\_044919"; transcript\_id "TCONS\_00074131";  
exon\_number "2"; oId "CUFF.79013.4"; tss\_id "TSS56412";

chr5 Cufflinks exon 133443536 133444894 . - . gene\_id "XLOC\_044919"; transcript\_id "TCONS\_00074131";  
exon\_number "3"; oId "CUFF.79013.4"; tss\_id "TSS56412";

chr5 Cufflinks exon 133448508 133449292 . - . gene\_id "XLOC\_044919"; transcript\_id "TCONS\_00074131";  
exon\_number "4"; oId "CUFF.79013.4"; tss\_id "TSS56412";

chr5 Cufflinks exon 137213130 137219310 . - . gene\_id "XLOC\_044966"; transcript\_id "TCONS\_00074200";  
exon\_number "1"; oId "CUFF.79153.1"; tss\_id "TSS56474";

chr5 Cufflinks exon 137223848 137223977 . - . gene\_id "XLOC\_044966"; transcript\_id "TCONS\_00074200";  
exon\_number "2"; oId "CUFF.79153.1"; tss\_id "TSS56474";

chr5 Cufflinks exon 137224836 137225058 . - . gene\_id "XLOC\_044966"; transcript\_id "TCONS\_00074200";

exon\_number "3"; oId "CUFF.79153.1"; tss\_id "TSS56474";  
chr5 Cufflinks exon 137213130 137219310 . - . gene\_id "XLOC\_044966"; transcript\_id "TCONS\_00074201";  
exon\_number "1"; oId "CUFF.79153.2"; tss\_id "TSS56474";  
chr5 Cufflinks exon 137223849 137223977 . - . gene\_id "XLOC\_044966"; transcript\_id "TCONS\_00074201";  
exon\_number "2"; oId "CUFF.79153.2"; tss\_id "TSS56474";  
chr5 Cufflinks exon 137224836 137225079 . - . gene\_id "XLOC\_044966"; transcript\_id "TCONS\_00074201";  
exon\_number "3"; oId "CUFF.79153.2"; tss\_id "TSS56474";  
chr5 Cufflinks exon 139482507 139483751 . - . gene\_id "XLOC\_045000"; transcript\_id "TCONS\_00074251";  
exon\_number "1"; oId "CUFF.79301.2"; tss\_id "TSS56513";  
chr5 Cufflinks exon 139485172 139485347 . - . gene\_id "XLOC\_045000"; transcript\_id "TCONS\_00074251";  
exon\_number "2"; oId "CUFF.79301.2"; tss\_id "TSS56513";  
chr5 Cufflinks exon 139485881 139486046 . - . gene\_id "XLOC\_045000"; transcript\_id "TCONS\_00074251";  
exon\_number "3"; oId "CUFF.79301.2"; tss\_id "TSS56513";  
chr5 Cufflinks exon 139486684 139487597 . - . gene\_id "XLOC\_045000"; transcript\_id "TCONS\_00074251";  
exon\_number "4"; oId "CUFF.79301.2"; tss\_id "TSS56513";  
chr5 Cufflinks exon 139482507 139483751 . - . gene\_id "XLOC\_045000"; transcript\_id "TCONS\_00074250";  
exon\_number "1"; oId "CUFF.79301.1"; tss\_id "TSS56513";  
chr5 Cufflinks exon 139485172 139485347 . - . gene\_id "XLOC\_045000"; transcript\_id "TCONS\_00074250";  
exon\_number "2"; oId "CUFF.79301.1"; tss\_id "TSS56513";  
chr5 Cufflinks exon 139485881 139487597 . - . gene\_id "XLOC\_045000"; transcript\_id "TCONS\_00074250";  
exon\_number "3"; oId "CUFF.79301.1"; tss\_id "TSS56513";  
chr5 Cufflinks exon 150365266 150365292 . - . gene\_id "XLOC\_045085"; transcript\_id "TCONS\_00074391";  
exon\_number "1"; oId "CUFF.79723.1"; tss\_id "TSS56623";  
chr5 Cufflinks exon 150373074 150373322 . - . gene\_id "XLOC\_045085"; transcript\_id "TCONS\_00074391";  
exon\_number "2"; oId "CUFF.79723.1"; tss\_id "TSS56623";  
chr5 Cufflinks exon 150398511 150408203 . - . gene\_id "XLOC\_045085"; transcript\_id "TCONS\_00074391";  
exon\_number "3"; oId "CUFF.79723.1"; tss\_id "TSS56623";  
chr5 Cufflinks exon 150548306 150549120 . - . gene\_id "XLOC\_045095"; transcript\_id "TCONS\_00074407";  
exon\_number "1"; oId "CUFF.79740.2"; tss\_id "TSS56635";  
chr5 Cufflinks exon 150549600 150549672 . - . gene\_id "XLOC\_045095"; transcript\_id "TCONS\_00074407";  
exon\_number "2"; oId "CUFF.79740.2"; tss\_id "TSS56635";  
chr5 Cufflinks exon 171217040 171217301 . - . gene\_id "XLOC\_045173"; transcript\_id "TCONS\_00074529";  
exon\_number "1"; oId "CUFF.80087.1"; tss\_id "TSS56725";  
chr5 Cufflinks exon 171222579 171222740 . - . gene\_id "XLOC\_045173"; transcript\_id "TCONS\_00074529";  
exon\_number "2"; oId "CUFF.80087.1"; tss\_id "TSS56725";  
chr5 Cufflinks exon 171223740 171223898 . - . gene\_id "XLOC\_045173"; transcript\_id "TCONS\_00074529";  
exon\_number "3"; oId "CUFF.80087.1"; tss\_id "TSS56725";  
chr5 Cufflinks exon 171232967 171233083 . - . gene\_id "XLOC\_045173"; transcript\_id "TCONS\_00074529";  
exon\_number "4"; oId "CUFF.80087.1"; tss\_id "TSS56725";  
chr5 Cufflinks exon 171259774 171259991 . - . gene\_id "XLOC\_045173"; transcript\_id "TCONS\_00074529";  
exon\_number "5"; oId "CUFF.80087.1"; tss\_id "TSS56725";  
chr5 Cufflinks exon 171260496 171262651 . - . gene\_id "XLOC\_045173"; transcript\_id "TCONS\_00074529";  
exon\_number "6"; oId "CUFF.80087.1"; tss\_id "TSS56725";

chr5 Cufflinks exon 171221061 171221573 . - . gene\_id "XLOC\_045173"; transcript\_id "TCONS\_00074530";  
exon\_number "1"; oId "CUFF.80087.5"; tss\_id "TSS56726";  
chr5 Cufflinks exon 171222579 171222594 . - . gene\_id "XLOC\_045173"; transcript\_id "TCONS\_00074530";  
exon\_number "2"; oId "CUFF.80087.5"; tss\_id "TSS56726";  
chr5 Cufflinks exon 171221061 171222740 . - . gene\_id "XLOC\_045173"; transcript\_id "TCONS\_00074532";  
exon\_number "1"; oId "CUFF.80087.3"; tss\_id "TSS56727";  
chr5 Cufflinks exon 171232967 171233714 . - . gene\_id "XLOC\_045173"; transcript\_id "TCONS\_00074532";  
exon\_number "2"; oId "CUFF.80087.3"; tss\_id "TSS56727";  
chr5 Cufflinks exon 171221061 171222360 . - . gene\_id "XLOC\_045173"; transcript\_id "TCONS\_00074531";  
exon\_number "1"; oId "CUFF.80087.2"; tss\_id "TSS56727";  
chr5 Cufflinks exon 171222579 171222740 . - . gene\_id "XLOC\_045173"; transcript\_id "TCONS\_00074531";  
exon\_number "2"; oId "CUFF.80087.2"; tss\_id "TSS56727";  
chr5 Cufflinks exon 171232967 171233714 . - . gene\_id "XLOC\_045173"; transcript\_id "TCONS\_00074531";  
exon\_number "3"; oId "CUFF.80087.2"; tss\_id "TSS56727";  
chr5 Cufflinks exon 171221061 171222360 . - . gene\_id "XLOC\_045173"; transcript\_id "TCONS\_00074533";  
exon\_number "1"; oId "CUFF.80087.4"; tss\_id "TSS56728";  
chr5 Cufflinks exon 171222579 171222740 . - . gene\_id "XLOC\_045173"; transcript\_id "TCONS\_00074533"; exon\_number "2";  
oId "CUFF.80087.4"; tss\_id "TSS56728";  
chr5 Cufflinks exon 171223740 171223898 . - . gene\_id "XLOC\_045173"; transcript\_id "TCONS\_00074533"; exon\_number "3";  
oId "CUFF.80087.4"; tss\_id "TSS56728";  
chr5 Cufflinks exon 171232967 171233083 . - . gene\_id "XLOC\_045173"; transcript\_id "TCONS\_00074533"; exon\_number "4";  
oId "CUFF.80087.4"; tss\_id "TSS56728";  
chr5 Cufflinks exon 171248114 171248284 . - . gene\_id "XLOC\_045173"; transcript\_id "TCONS\_00074533"; exon\_number "5";  
oId "CUFF.80087.4"; tss\_id "TSS56728";  
chr5 Cufflinks exon 171272510 171272698 . - . gene\_id "XLOC\_045173"; transcript\_id "TCONS\_00074533"; exon\_number "6";  
oId "CUFF.80087.4"; tss\_id "TSS56728";  
chr5 Cufflinks exon 171274665 171278302 . - . gene\_id "XLOC\_045173"; transcript\_id "TCONS\_00074533"; exon\_number "7";  
oId "CUFF.80087.4"; tss\_id "TSS56728";  
chr5 Cufflinks exon 171225768 171226915 . - . gene\_id "XLOC\_045173"; transcript\_id "TCONS\_00074536"; exon\_number "1";  
oId "CUFF.80087.6"; tss\_id "TSS56729";  
chr5 Cufflinks exon 171232967 171233083 . - . gene\_id "XLOC\_045173"; transcript\_id "TCONS\_00074536"; exon\_number "2";  
oId "CUFF.80087.6"; tss\_id "TSS56729";  
chr5 Cufflinks exon 171247938 171248818 . - . gene\_id "XLOC\_045173"; transcript\_id "TCONS\_00074536"; exon\_number "3";  
oId "CUFF.80087.6"; tss\_id "TSS56729";  
chr5 Cufflinks exon 171251679 171252034 . - . gene\_id "XLOC\_045173"; transcript\_id "TCONS\_00074542"; exon\_number "1";  
oId "CUFF.80087.7"; tss\_id "TSS56725";  
chr5 Cufflinks exon 171259774 171259991 . - . gene\_id "XLOC\_045173"; transcript\_id "TCONS\_00074542"; exon\_number "2";  
oId "CUFF.80087.7"; tss\_id "TSS56725";  
chr5 Cufflinks exon 171260496 171262651 . - . gene\_id "XLOC\_045173"; transcript\_id "TCONS\_00074542"; exon\_number "3";  
oId "CUFF.80087.7"; tss\_id "TSS56725";  
chr5 Cufflinks exon 171262976 171269623 . - . gene\_id "XLOC\_045173"; transcript\_id "TCONS\_00074543"; exon\_number "1";  
oId "CUFF.80087.12"; tss\_id "TSS56731";  
chr5 Cufflinks exon 171272510 171272698 . - . gene\_id "XLOC\_045173"; transcript\_id "TCONS\_00074543"; exon\_number "2";

|                                                                                   |   |   |   |                                                                         |
|-----------------------------------------------------------------------------------|---|---|---|-------------------------------------------------------------------------|
| oId "CUFF.80087.12"; tss_id "TSS56731";<br>chr5 Cufflinks exon171272913 171273726 | . | - | . | gene_id "XLOC_045173"; transcript_id "TCONS_00074543"; exon_number "3"; |
| oId "CUFF.80087.12"; tss_id "TSS56731";<br>chr5 Cufflinks exon173863024 173863179 | . | - | . | gene_id "XLOC_045202"; transcript_id "TCONS_00074586"; exon_number "1"; |
| oId "CUFF.80182.1"; tss_id "TSS56765";<br>chr5 Cufflinks exon173880766 173880991  | . | - | . | gene_id "XLOC_045202"; transcript_id "TCONS_00074586"; exon_number "2"; |
| oId "CUFF.80182.1"; tss_id "TSS56765";<br>chr5 Cufflinks exon173881416 173881536  | . | - | . | gene_id "XLOC_045202"; transcript_id "TCONS_00074586"; exon_number "3"; |
| oId "CUFF.80182.1"; tss_id "TSS56765";<br>chr5 Cufflinks exon173880543 173880984  | . | - | . | gene_id "XLOC_045202"; transcript_id "TCONS_00074587"; exon_number "1"; |
| oId "CUFF.80182.3"; tss_id "TSS56765";<br>chr5 Cufflinks exon173881396 173881514  | . | - | . | gene_id "XLOC_045202"; transcript_id "TCONS_00074587"; exon_number "2"; |
| oId "CUFF.80182.3"; tss_id "TSS56765";<br>chr5 Cufflinks exon173880543 173880984  | . | - | . | gene_id "XLOC_045202"; transcript_id "TCONS_00074588"; exon_number "1"; |
| oId "CUFF.80182.2"; tss_id "TSS56765";<br>chr5 Cufflinks exon173881416 173881536  | . | - | . | gene_id "XLOC_045202"; transcript_id "TCONS_00074588"; exon_number "2"; |
| oId "CUFF.80182.2"; tss_id "TSS56765";<br>chr5 Cufflinks exon174002558 174003569  | . | - | . | gene_id "XLOC_045208"; transcript_id "TCONS_00074594"; exon_number "1"; |
| oId "CUFF.80196.1"; tss_id "TSS56771";<br>chr5 Cufflinks exon174005090 174005201  | . | - | . | gene_id "XLOC_045208"; transcript_id "TCONS_00074594"; exon_number "2"; |
| oId "CUFF.80196.1"; tss_id "TSS56771";<br>chr5 Cufflinks exon174006210 174006514  | . | - | . | gene_id "XLOC_045208"; transcript_id "TCONS_00074594"; exon_number "3"; |
| oId "CUFF.80196.1"; tss_id "TSS56771";<br>chr5 Cufflinks exon174016870 174020053  | . | - | . | gene_id "XLOC_045208"; transcript_id "TCONS_00074594"; exon_number "4"; |
| oId "CUFF.80196.1"; tss_id "TSS56771";<br>chr5 Cufflinks exon174005765 174006514  | . | - | . | gene_id "XLOC_045208"; transcript_id "TCONS_00074597"; exon_number "1"; |
| oId "CUFF.80196.2"; tss_id "TSS56771";<br>chr5 Cufflinks exon174016870 174020053  | . | - | . | gene_id "XLOC_045208"; transcript_id "TCONS_00074597"; exon_number "2"; |
| oId "CUFF.80196.2"; tss_id "TSS56771";<br>chr5 Cufflinks exon175202511 175202847  | . | - | . | gene_id "XLOC_045214"; transcript_id "TCONS_00074601"; exon_number "1"; |
| oId "CUFF.80220.1"; tss_id "TSS56777";<br>chr5 Cufflinks exon175208898 175208971  | . | - | . | gene_id "XLOC_045214"; transcript_id "TCONS_00074601"; exon_number "2"; |
| oId "CUFF.80220.1"; tss_id "TSS56777";<br>chr5 Cufflinks exon175381015 175381087  | . | - | . | gene_id "XLOC_045214"; transcript_id "TCONS_00074601"; exon_number "3"; |
| oId "CUFF.80220.1"; tss_id "TSS56777";<br>chr5 Cufflinks exon176425982 176426023  | . | - | . | gene_id "XLOC_045237"; transcript_id "TCONS_00074644"; exon_number "1"; |
| oId "CUFF.80282.1"; tss_id "TSS56804";<br>chr5 Cufflinks exon176449465 176449638  | . | - | . | gene_id "XLOC_045237"; transcript_id "TCONS_00074644"; exon_number "2"; |
| oId "CUFF.80282.1"; tss_id "TSS56804";<br>chr5 Cufflinks exon180607027 180607561  | . | - | . | gene_id "XLOC_045326"; transcript_id "TCONS_00074802"; exon_number "1"; |
| oId "CUFF.80586.1"; tss_id "TSS56913";<br>chr5 Cufflinks exon180615602 180615749  | . | - | . | gene_id "XLOC_045326"; transcript_id "TCONS_00074802"; exon_number "2"; |
| oId "CUFF.80586.1"; tss_id "TSS56913";                                            |   |   |   |                                                                         |

chr5 Cufflinks exon180616418 180617024 . - . gene\_id "XLOC\_045326"; transcript\_id "TCONS\_00074802"; exon\_number "3";  
oId "CUFF.80586.1"; tss\_id "TSS56913";

chr5 Cufflinks exon180613980 180615749 . - . gene\_id "XLOC\_045326"; transcript\_id "TCONS\_00074803"; exon\_number "1";  
oId "CUFF.80586.3"; tss\_id "TSS56914";

chr5 Cufflinks exon180615909 180616782 . - . gene\_id "XLOC\_045326"; transcript\_id "TCONS\_00074803"; exon\_number "2";  
oId "CUFF.80586.3"; tss\_id "TSS56914";

chr5 Cufflinks exon180613980 180615749 . - . gene\_id "XLOC\_045326"; transcript\_id "TCONS\_00074805"; exon\_number "1";  
oId "CUFF.80586.4"; tss\_id "TSS56915";

chr5 Cufflinks exon180617324 180618345 . - . gene\_id "XLOC\_045326"; transcript\_id "TCONS\_00074805"; exon\_number "2";  
oId "CUFF.80586.4"; tss\_id "TSS56915";

chr5 Cufflinks exon180618742 180618908 . - . gene\_id "XLOC\_045326"; transcript\_id "TCONS\_00074805"; exon\_number "3";  
oId "CUFF.80586.4"; tss\_id "TSS56915";

chr5 Cufflinks exon180613980 180615749 . - . gene\_id "XLOC\_045326"; transcript\_id "TCONS\_00074804"; exon\_number "1";  
oId "CUFF.80586.2"; tss\_id "TSS56915";

chr5 Cufflinks exon180617324 180618908 . - . gene\_id "XLOC\_045326"; transcript\_id "TCONS\_00074804"; exon\_number "2";  
oId "CUFF.80586.2"; tss\_id "TSS56915";

chr6 Cufflinks exon2245987 2246164 . + . gene\_id "XLOC\_045382"; transcript\_id "TCONS\_00074875"; exon\_number "1"; oId  
"CUFF.80687.6"; tss\_id "TSS56976";

chr6 Cufflinks exon2249071 2249160 . + . gene\_id "XLOC\_045382"; transcript\_id "TCONS\_00074875"; exon\_number "2"; oId  
"CUFF.80687.6"; tss\_id "TSS56976";

chr6 Cufflinks exon2263835 2263918 . + . gene\_id "XLOC\_045382"; transcript\_id "TCONS\_00074875"; exon\_number "3"; oId  
"CUFF.80687.6"; tss\_id "TSS56976";

chr6 Cufflinks exon2269932 2270033 . + . gene\_id "XLOC\_045382"; transcript\_id "TCONS\_00074875"; exon\_number "4"; oId  
"CUFF.80687.6"; tss\_id "TSS56976";

chr6 Cufflinks exon2398811 2399012 . + . gene\_id "XLOC\_045382"; transcript\_id "TCONS\_00074875"; exon\_number "5"; oId  
"CUFF.80687.6"; tss\_id "TSS56976";

chr6 Cufflinks exon2399100 2399271 . + . gene\_id "XLOC\_045382"; transcript\_id "TCONS\_00074875"; exon\_number "6"; oId  
"CUFF.80687.6"; tss\_id "TSS56976";

chr6 Cufflinks exon2413014 2413825 . + . gene\_id "XLOC\_045382"; transcript\_id "TCONS\_00074875"; exon\_number "7"; oId  
"CUFF.80687.6"; tss\_id "TSS56976";

chr6 Cufflinks exon2245987 2246164 . + . gene\_id "XLOC\_045382"; transcript\_id "TCONS\_00074876"; exon\_number "1"; oId  
"CUFF.80687.7"; tss\_id "TSS56976";

chr6 Cufflinks exon2249071 2249160 . + . gene\_id "XLOC\_045382"; transcript\_id "TCONS\_00074876"; exon\_number "2"; oId  
"CUFF.80687.7"; tss\_id "TSS56976";

chr6 Cufflinks exon2263835 2263918 . + . gene\_id "XLOC\_045382"; transcript\_id "TCONS\_00074876"; exon\_number "3"; oId  
"CUFF.80687.7"; tss\_id "TSS56976";

chr6 Cufflinks exon2269932 2270033 . + . gene\_id "XLOC\_045382"; transcript\_id "TCONS\_00074876"; exon\_number "4"; oId  
"CUFF.80687.7"; tss\_id "TSS56976";

chr6 Cufflinks exon2398811 2399012 . + . gene\_id "XLOC\_045382"; transcript\_id "TCONS\_00074876"; exon\_number "5"; oId  
"CUFF.80687.7"; tss\_id "TSS56976";

chr6 Cufflinks exon2399100 2399271 . + . gene\_id "XLOC\_045382"; transcript\_id "TCONS\_00074876"; exon\_number "6"; oId  
"CUFF.80687.7"; tss\_id "TSS56976";

chr6 Cufflinks exon2412721 2413825 . + . gene\_id "XLOC\_045382"; transcript\_id "TCONS\_00074876"; exon\_number "7"; oId

"CUFF.80687.7"; tss\_id "TSS56976";  
chr6 Cufflinks exon2245987 2246164 . + . gene\_id "XLOC\_045382"; transcript\_id "TCONS\_00074874"; exon\_number "1"; oId  
"CUFF.80687.5"; tss\_id "TSS56976";  
chr6 Cufflinks exon2249071 2249160 . + . gene\_id "XLOC\_045382"; transcript\_id "TCONS\_00074874"; exon\_number "2"; oId  
"CUFF.80687.5"; tss\_id "TSS56976";  
chr6 Cufflinks exon2263835 2263918 . + . gene\_id "XLOC\_045382"; transcript\_id "TCONS\_00074874"; exon\_number "3"; oId  
"CUFF.80687.5"; tss\_id "TSS56976";  
chr6 Cufflinks exon2397455 2397860 . + . gene\_id "XLOC\_045382"; transcript\_id "TCONS\_00074874"; exon\_number "4"; oId  
"CUFF.80687.5"; tss\_id "TSS56976";  
chr6 Cufflinks exon2398811 2399012 . + . gene\_id "XLOC\_045382"; transcript\_id "TCONS\_00074874"; exon\_number "5"; oId  
"CUFF.80687.5"; tss\_id "TSS56976";  
chr6 Cufflinks exon2399100 2399271 . + . gene\_id "XLOC\_045382"; transcript\_id "TCONS\_00074874"; exon\_number "6"; oId  
"CUFF.80687.5"; tss\_id "TSS56976";  
chr6 Cufflinks exon2413014 2413825 . + . gene\_id "XLOC\_045382"; transcript\_id "TCONS\_00074874"; exon\_number "7"; oId  
"CUFF.80687.5"; tss\_id "TSS56976";  
chr6 Cufflinks exon2245987 2246164 . + . gene\_id "XLOC\_045382"; transcript\_id "TCONS\_00074873"; exon\_number "1"; oId  
"CUFF.80687.3"; tss\_id "TSS56976";  
chr6 Cufflinks exon2249071 2249160 . + . gene\_id "XLOC\_045382"; transcript\_id "TCONS\_00074873"; exon\_number "2"; oId  
"CUFF.80687.3"; tss\_id "TSS56976";  
chr6 Cufflinks exon2263835 2263918 . + . gene\_id "XLOC\_045382"; transcript\_id "TCONS\_00074873"; exon\_number "3"; oId  
"CUFF.80687.3"; tss\_id "TSS56976";  
chr6 Cufflinks exon2329517 2329566 . + . gene\_id "XLOC\_045382"; transcript\_id "TCONS\_00074873"; exon\_number "4"; oId  
"CUFF.80687.3"; tss\_id "TSS56976";  
chr6 Cufflinks exon2398811 2399012 . + . gene\_id "XLOC\_045382"; transcript\_id "TCONS\_00074873"; exon\_number "5"; oId  
"CUFF.80687.3"; tss\_id "TSS56976";  
chr6 Cufflinks exon2399100 2399271 . + . gene\_id "XLOC\_045382"; transcript\_id "TCONS\_00074873"; exon\_number "6"; oId  
"CUFF.80687.3"; tss\_id "TSS56976";  
chr6 Cufflinks exon2413014 2413825 . + . gene\_id "XLOC\_045382"; transcript\_id "TCONS\_00074873"; exon\_number "7"; oId  
"CUFF.80687.3"; tss\_id "TSS56976";  
chr6 Cufflinks exon5997558 5998139 . + . gene\_id "XLOC\_045475"; transcript\_id "TCONS\_00074998"; exon\_number "1"; oId  
"CUFF.80909.6"; tss\_id "TSS57076";  
chr6 Cufflinks exon5998674 5998928 . + . gene\_id "XLOC\_045475"; transcript\_id "TCONS\_00074998"; exon\_number "2"; oId  
"CUFF.80909.6"; tss\_id "TSS57076";  
chr6 Cufflinks exon8435831 8436411 . + . gene\_id "XLOC\_045494"; transcript\_id "TCONS\_00075022"; exon\_number "1"; oId  
"CUFF.80999.1"; tss\_id "TSS57097";  
chr6 Cufflinks exon8438196 8438264 . + . gene\_id "XLOC\_045494"; transcript\_id "TCONS\_00075022"; exon\_number "2"; oId  
"CUFF.80999.1"; tss\_id "TSS57097";  
chr6 Cufflinks exon8547350 8547447 . + . gene\_id "XLOC\_045494"; transcript\_id "TCONS\_00075022"; exon\_number "3"; oId  
"CUFF.80999.1"; tss\_id "TSS57097";  
chr6 Cufflinks exon8558818 8558876 . + . gene\_id "XLOC\_045494"; transcript\_id "TCONS\_00075022"; exon\_number "4"; oId  
"CUFF.80999.1"; tss\_id "TSS57097";  
chr6 Cufflinks exon8609095 8609145 . + . gene\_id "XLOC\_045494"; transcript\_id "TCONS\_00075022"; exon\_number "5"; oId  
"CUFF.80999.1"; tss\_id "TSS57097";

|                                    |   |   |                                                                                                                |
|------------------------------------|---|---|----------------------------------------------------------------------------------------------------------------|
| chr6 Cufflinks exon8435856 8436411 | + | . | gene_id "XLOC_045494"; transcript_id "TCONS_00075023"; exon_number "1"; oId "CUFF.80999.7"; tss_id "TSS57097"; |
| chr6 Cufflinks exon8438196 8438264 | + | . | gene_id "XLOC_045494"; transcript_id "TCONS_00075023"; exon_number "2"; oId "CUFF.80999.7"; tss_id "TSS57097"; |
| chr6 Cufflinks exon8466612 8466657 | + | . | gene_id "XLOC_045494"; transcript_id "TCONS_00075023"; exon_number "3"; oId "CUFF.80999.7"; tss_id "TSS57097"; |
| chr6 Cufflinks exon8435856 8436411 | + | . | gene_id "XLOC_045494"; transcript_id "TCONS_00075024"; exon_number "1"; oId "CUFF.80999.6"; tss_id "TSS57097"; |
| chr6 Cufflinks exon8438196 8438264 | + | . | gene_id "XLOC_045494"; transcript_id "TCONS_00075024"; exon_number "2"; oId "CUFF.80999.6"; tss_id "TSS57097"; |
| chr6 Cufflinks exon8470224 8470792 | + | . | gene_id "XLOC_045494"; transcript_id "TCONS_00075024"; exon_number "3"; oId "CUFF.80999.6"; tss_id "TSS57097"; |
| chr6 Cufflinks exon8435856 8436411 | + | . | gene_id "XLOC_045494"; transcript_id "TCONS_00075025"; exon_number "1"; oId "CUFF.80999.5"; tss_id "TSS57097"; |
| chr6 Cufflinks exon8438173 8438264 | + | . | gene_id "XLOC_045494"; transcript_id "TCONS_00075025"; exon_number "2"; oId "CUFF.80999.5"; tss_id "TSS57097"; |
| chr6 Cufflinks exon8547350 8547368 | + | . | gene_id "XLOC_045494"; transcript_id "TCONS_00075025"; exon_number "3"; oId "CUFF.80999.5"; tss_id "TSS57097"; |
| chr6 Cufflinks exon8435856 8436411 | + | . | gene_id "XLOC_045494"; transcript_id "TCONS_00075026"; exon_number "1"; oId "CUFF.80999.4"; tss_id "TSS57097"; |
| chr6 Cufflinks exon8438196 8438264 | + | . | gene_id "XLOC_045494"; transcript_id "TCONS_00075026"; exon_number "2"; oId "CUFF.80999.4"; tss_id "TSS57097"; |
| chr6 Cufflinks exon8558818 8558876 | + | . | gene_id "XLOC_045494"; transcript_id "TCONS_00075026"; exon_number "3"; oId "CUFF.80999.4"; tss_id "TSS57097"; |
| chr6 Cufflinks exon8710842 8712526 | + | . | gene_id "XLOC_045494"; transcript_id "TCONS_00075026"; exon_number "4"; oId "CUFF.80999.4"; tss_id "TSS57097"; |
| chr6 Cufflinks exon8435856 8436411 | + | . | gene_id "XLOC_045494"; transcript_id "TCONS_00075027"; exon_number "1"; oId "CUFF.80999.2"; tss_id "TSS57097"; |
| chr6 Cufflinks exon8438173 8438264 | + | . | gene_id "XLOC_045494"; transcript_id "TCONS_00075027"; exon_number "2"; oId "CUFF.80999.2"; tss_id "TSS57097"; |
| chr6 Cufflinks exon8558818 8558876 | + | . | gene_id "XLOC_045494"; transcript_id "TCONS_00075027"; exon_number "3"; oId "CUFF.80999.2"; tss_id "TSS57097"; |
| chr6 Cufflinks exon8784424 8784570 | + | . | gene_id "XLOC_045494"; transcript_id "TCONS_00075027"; exon_number "4"; oId "CUFF.80999.2"; tss_id "TSS57097"; |
| chr6 Cufflinks exon8785350 8785678 | + | . | gene_id "XLOC_045494"; transcript_id "TCONS_00075027"; exon_number "5"; oId "CUFF.80999.2"; tss_id "TSS57097"; |
| chr6 Cufflinks exon8435856 8436411 | + | . | gene_id "XLOC_045494"; transcript_id "TCONS_00075028"; exon_number "1"; oId "CUFF.80999.3"; tss_id "TSS57097"; |
| chr6 Cufflinks exon8438196 8438264 | + | . | gene_id "XLOC_045494"; transcript_id "TCONS_00075028"; exon_number "2"; oId "CUFF.80999.3"; tss_id "TSS57097"; |
| chr6 Cufflinks exon8558818 8558876 | + | . | gene_id "XLOC_045494"; transcript_id "TCONS_00075028"; exon_number "3"; oId "CUFF.80999.3"; tss_id "TSS57097"; |
| chr6 Cufflinks exon8784424 8784570 | + | . | gene_id "XLOC_045494"; transcript_id "TCONS_00075028"; exon_number "4"; oId "CUFF.80999.3"; tss_id "TSS57097"; |

"CUFF.80999.3"; tss\_id "TSS57097";  
chr6 Cufflinks exon8785350 8785504 . + . gene\_id "XLOC\_045494"; transcript\_id "TCONS\_00075028"; exon\_number "5"; oId  
"CUFF.80999.3"; tss\_id "TSS57097";  
chr6 Cufflinks exon8789055 8789097 . + . gene\_id "XLOC\_045494"; transcript\_id "TCONS\_00075028"; exon\_number "6"; oId  
"CUFF.80999.3"; tss\_id "TSS57097";  
chr6 Cufflinks exon13328857 13329130 . + . gene\_id "XLOC\_045534"; transcript\_id "TCONS\_00075101"; exon\_number "1";  
oId "CUFF.81137.2"; tss\_id "TSS57156";  
chr6 Cufflinks exon13329957 13330079 . + . gene\_id "XLOC\_045534"; transcript\_id "TCONS\_00075101"; exon\_number "2";  
oId "CUFF.81137.2"; tss\_id "TSS57156";  
chr6 Cufflinks exon14211507 14216755 . + . gene\_id "XLOC\_045553"; transcript\_id "TCONS\_00075126"; exon\_number "1";  
oId "CUFF.81188.1"; tss\_id "TSS57177";  
chr6 Cufflinks exon14216896 14218383 . + . gene\_id "XLOC\_045553"; transcript\_id "TCONS\_00075126"; exon\_number "2";  
oId "CUFF.81188.1"; tss\_id "TSS57177";  
chr6 Cufflinks exon14214718 14216755 . + . gene\_id "XLOC\_045553"; transcript\_id "TCONS\_00075127"; exon\_number "1";  
oId "CUFF.81188.2"; tss\_id "TSS57178";  
chr6 Cufflinks exon14216899 14218383 . + . gene\_id "XLOC\_045553"; transcript\_id "TCONS\_00075127"; exon\_number "2";  
oId "CUFF.81188.2"; tss\_id "TSS57178";  
chr6 Cufflinks exon14457209 14457309 . + . gene\_id "XLOC\_045575"; transcript\_id "TCONS\_00075149"; exon\_number "1";  
oId "CUFF.81242.1"; tss\_id "TSS57200";  
chr6 Cufflinks exon14498288 14498396 . + . gene\_id "XLOC\_045575"; transcript\_id "TCONS\_00075149"; exon\_number "2";  
oId "CUFF.81242.1"; tss\_id "TSS57200";  
chr6 Cufflinks exon14509054 14514451 . + . gene\_id "XLOC\_045575"; transcript\_id "TCONS\_00075149"; exon\_number "3";  
oId "CUFF.81242.1"; tss\_id "TSS57200";  
chr6 Cufflinks exon14498354 14498396 . + . gene\_id "XLOC\_045575"; transcript\_id "TCONS\_00075151"; exon\_number "1";  
oId "CUFF.81242.2"; tss\_id "TSS57201";  
chr6 Cufflinks exon14509054 14509292 . + . gene\_id "XLOC\_045575"; transcript\_id "TCONS\_00075151"; exon\_number "2";  
oId "CUFF.81242.2"; tss\_id "TSS57201";  
chr6 Cufflinks exon14512175 14514451 . + . gene\_id "XLOC\_045575"; transcript\_id "TCONS\_00075151"; exon\_number "3";  
oId "CUFF.81242.2"; tss\_id "TSS57201";  
chr6 Cufflinks exon14512213 14512423 . + . gene\_id "XLOC\_045575"; transcript\_id "TCONS\_00075152"; exon\_number "1";  
oId "CUFF.81242.3"; tss\_id "TSS57202";  
chr6 Cufflinks exon14513206 14514451 . + . gene\_id "XLOC\_045575"; transcript\_id "TCONS\_00075152"; exon\_number "2";  
oId "CUFF.81242.3"; tss\_id "TSS57202";  
chr6 Cufflinks exon16761629 16762510 . + . gene\_id "XLOC\_045593"; transcript\_id "TCONS\_00075176"; exon\_number "1";  
oId "CUFF.81292.1"; tss\_id "TSS57225";  
chr6 Cufflinks exon16762583 16765321 . + . gene\_id "XLOC\_045593"; transcript\_id "TCONS\_00075176"; exon\_number "2";  
oId "CUFF.81292.1"; tss\_id "TSS57225";  
chr6 Cufflinks exon16765375 16767029 . + . gene\_id "XLOC\_045593"; transcript\_id "TCONS\_00075176"; exon\_number "3";  
oId "CUFF.81292.1"; tss\_id "TSS57225";  
chr6 Cufflinks exon16761806 16762099 . + . gene\_id "XLOC\_045593"; transcript\_id "TCONS\_00075177"; exon\_number "1";  
oId "CUFF.81292.2"; tss\_id "TSS57226";  
chr6 Cufflinks exon16762350 16762510 . + . gene\_id "XLOC\_045593"; transcript\_id "TCONS\_00075177"; exon\_number "2";  
oId "CUFF.81292.2"; tss\_id "TSS57226";



|                                        |          |   |   |   |                                                                          |
|----------------------------------------|----------|---|---|---|--------------------------------------------------------------------------|
| chr6 Cufflinks exon16762583            | 16762745 | . | + | . | gene_id "XLOC_045593"; transcript_id "TCONS_00075177"; exon_number "3";  |
| oId "CUFF.81292.2"; tss_id "TSS57226"; |          |   |   |   |                                                                          |
| chr6 Cufflinks exon21666675            | 21666876 | . | + | . | gene_id "XLOC_045612"; transcript_id "TCONS_00075218"; exon_number "1";  |
| oId "CUFF.81365.1"; tss_id "TSS57248"; |          |   |   |   |                                                                          |
| chr6 Cufflinks exon21668878            | 21669130 | . | + | . | gene_id "XLOC_045612"; transcript_id "TCONS_00075218"; exon_number "2";  |
| oId "CUFF.81365.1"; tss_id "TSS57248"; |          |   |   |   |                                                                          |
| chr6 Cufflinks exon21783863            | 21783939 | . | + | . | gene_id "XLOC_045612"; transcript_id "TCONS_00075218"; exon_number "3";  |
| oId "CUFF.81365.1"; tss_id "TSS57248"; |          |   |   |   |                                                                          |
| chr6 Cufflinks exon21802888            | 21802971 | . | + | . | gene_id "XLOC_045612"; transcript_id "TCONS_00075218"; exon_number "4";  |
| oId "CUFF.81365.1"; tss_id "TSS57248"; |          |   |   |   |                                                                          |
| chr6 Cufflinks exon21909701            | 21909834 | . | + | . | gene_id "XLOC_045612"; transcript_id "TCONS_00075218"; exon_number "5";  |
| oId "CUFF.81365.1"; tss_id "TSS57248"; |          |   |   |   |                                                                          |
| chr6 Cufflinks exon21979174            | 21979291 | . | + | . | gene_id "XLOC_045612"; transcript_id "TCONS_00075218"; exon_number "6";  |
| oId "CUFF.81365.1"; tss_id "TSS57248"; |          |   |   |   |                                                                          |
| chr6 Cufflinks exon22020568            | 22020771 | . | + | . | gene_id "XLOC_045612"; transcript_id "TCONS_00075218"; exon_number "7";  |
| oId "CUFF.81365.1"; tss_id "TSS57248"; |          |   |   |   |                                                                          |
| chr6 Cufflinks exon22056775            | 22056919 | . | + | . | gene_id "XLOC_045612"; transcript_id "TCONS_00075218"; exon_number "8";  |
| oId "CUFF.81365.1"; tss_id "TSS57248"; |          |   |   |   |                                                                          |
| chr6 Cufflinks exon22110976            | 22111149 | . | + | . | gene_id "XLOC_045612"; transcript_id "TCONS_00075218"; exon_number "9";  |
| oId "CUFF.81365.1"; tss_id "TSS57248"; |          |   |   |   |                                                                          |
| chr6 Cufflinks exon22174227            | 22174291 | . | + | . | gene_id "XLOC_045612"; transcript_id "TCONS_00075218"; exon_number "10"; |
| oId "CUFF.81365.1"; tss_id "TSS57248"; |          |   |   |   |                                                                          |
| chr6 Cufflinks exon22191796            | 22191885 | . | + | . | gene_id "XLOC_045612"; transcript_id "TCONS_00075218"; exon_number "11"; |
| oId "CUFF.81365.1"; tss_id "TSS57248"; |          |   |   |   |                                                                          |
| chr6 Cufflinks exon22194274            | 22206219 | . | + | . | gene_id "XLOC_045612"; transcript_id "TCONS_00075218"; exon_number "12"; |
| oId "CUFF.81365.1"; tss_id "TSS57248"; |          |   |   |   |                                                                          |
| chr6 Cufflinks exon21883998            | 21884270 | . | + | . | gene_id "XLOC_045612"; transcript_id "TCONS_00075230"; exon_number "1";  |
| oId "CUFF.81365.3"; tss_id "TSS57249"; |          |   |   |   |                                                                          |
| chr6 Cufflinks exon21909701            | 21909834 | . | + | . | gene_id "XLOC_045612"; transcript_id "TCONS_00075230"; exon_number "2";  |
| oId "CUFF.81365.3"; tss_id "TSS57249"; |          |   |   |   |                                                                          |
| chr6 Cufflinks exon21979174            | 21979291 | . | + | . | gene_id "XLOC_045612"; transcript_id "TCONS_00075230"; exon_number "3";  |
| oId "CUFF.81365.3"; tss_id "TSS57249"; |          |   |   |   |                                                                          |
| chr6 Cufflinks exon22020568            | 22020771 | . | + | . | gene_id "XLOC_045612"; transcript_id "TCONS_00075230"; exon_number "4";  |
| oId "CUFF.81365.3"; tss_id "TSS57249"; |          |   |   |   |                                                                          |
| chr6 Cufflinks exon22056775            | 22056919 | . | + | . | gene_id "XLOC_045612"; transcript_id "TCONS_00075230"; exon_number "5";  |
| oId "CUFF.81365.3"; tss_id "TSS57249"; |          |   |   |   |                                                                          |
| chr6 Cufflinks exon22110976            | 22111149 | . | + | . | gene_id "XLOC_045612"; transcript_id "TCONS_00075230"; exon_number "6";  |
| oId "CUFF.81365.3"; tss_id "TSS57249"; |          |   |   |   |                                                                          |
| chr6 Cufflinks exon22146863            | 22148519 | . | + | . | gene_id "XLOC_045612"; transcript_id "TCONS_00075230"; exon_number "7";  |
| oId "CUFF.81365.3"; tss_id "TSS57249"; |          |   |   |   |                                                                          |
| chr6 Cufflinks exon22191796            | 22191885 | . | + | . | gene_id "XLOC_045612"; transcript_id "TCONS_00075230"; exon_number "8";  |
| oId "CUFF.81365.3"; tss_id "TSS57249"; |          |   |   |   |                                                                          |
| chr6 Cufflinks exon22194274            | 22206219 | . | + | . | gene_id "XLOC_045612"; transcript_id "TCONS_00075230"; exon_number "9";  |

oId "CUFF.81365.3"; tss\_id "TSS57249";  
chr6 Cufflinks exon21883998 21884270 . + . gene\_id "XLOC\_045612"; transcript\_id "TCONS\_00075229"; exon\_number "1";  
oId "CUFF.81365.2"; tss\_id "TSS57249";  
chr6 Cufflinks exon21885442 21885584 . + . gene\_id "XLOC\_045612"; transcript\_id "TCONS\_00075229"; exon\_number "2";  
oId "CUFF.81365.2"; tss\_id "TSS57249";  
chr6 Cufflinks exon21909701 21909834 . + . gene\_id "XLOC\_045612"; transcript\_id "TCONS\_00075229"; exon\_number "3";  
oId "CUFF.81365.2"; tss\_id "TSS57249";  
chr6 Cufflinks exon21979174 21979291 . + . gene\_id "XLOC\_045612"; transcript\_id "TCONS\_00075229"; exon\_number "4";  
oId "CUFF.81365.2"; tss\_id "TSS57249";  
chr6 Cufflinks exon22020568 22020771 . + . gene\_id "XLOC\_045612"; transcript\_id "TCONS\_00075229"; exon\_number "5";  
oId "CUFF.81365.2"; tss\_id "TSS57249";  
chr6 Cufflinks exon22056775 22056919 . + . gene\_id "XLOC\_045612"; transcript\_id "TCONS\_00075229"; exon\_number "6";  
oId "CUFF.81365.2"; tss\_id "TSS57249";  
chr6 Cufflinks exon22110976 22111149 . + . gene\_id "XLOC\_045612"; transcript\_id "TCONS\_00075229"; exon\_number "7";  
oId "CUFF.81365.2"; tss\_id "TSS57249";  
chr6 Cufflinks exon22174227 22174291 . + . gene\_id "XLOC\_045612"; transcript\_id "TCONS\_00075229"; exon\_number "8";  
oId "CUFF.81365.2"; tss\_id "TSS57249";  
chr6 Cufflinks exon22191796 22191885 . + . gene\_id "XLOC\_045612"; transcript\_id "TCONS\_00075229"; exon\_number "9";  
oId "CUFF.81365.2"; tss\_id "TSS57249";  
chr6 Cufflinks exon22194274 22201431 . + . gene\_id "XLOC\_045612"; transcript\_id "TCONS\_00075229"; exon\_number "10";  
oId "CUFF.81365.2"; tss\_id "TSS57249";  
chr6 Cufflinks exon22201471 22206219 . + . gene\_id "XLOC\_045612"; transcript\_id "TCONS\_00075229"; exon\_number "11";  
oId "CUFF.81365.2"; tss\_id "TSS57249";  
chr6 Cufflinks exon21884031 21884218 . + . gene\_id "XLOC\_045612"; transcript\_id "TCONS\_00075231"; exon\_number "1";  
oId "CUFF.81365.4"; tss\_id "TSS57249";  
chr6 Cufflinks exon21885442 21885584 . + . gene\_id "XLOC\_045612"; transcript\_id "TCONS\_00075231"; exon\_number "2";  
oId "CUFF.81365.4"; tss\_id "TSS57249";  
chr6 Cufflinks exon21909701 21909834 . + . gene\_id "XLOC\_045612"; transcript\_id "TCONS\_00075231"; exon\_number "3";  
oId "CUFF.81365.4"; tss\_id "TSS57249";  
chr6 Cufflinks exon21979174 21979291 . + . gene\_id "XLOC\_045612"; transcript\_id "TCONS\_00075231"; exon\_number "4";  
oId "CUFF.81365.4"; tss\_id "TSS57249";  
chr6 Cufflinks exon22020568 22020771 . + . gene\_id "XLOC\_045612"; transcript\_id "TCONS\_00075231"; exon\_number "5";  
oId "CUFF.81365.4"; tss\_id "TSS57249";  
chr6 Cufflinks exon22056775 22056919 . + . gene\_id "XLOC\_045612"; transcript\_id "TCONS\_00075231"; exon\_number "6";  
oId "CUFF.81365.4"; tss\_id "TSS57249";  
chr6 Cufflinks exon22110976 22111149 . + . gene\_id "XLOC\_045612"; transcript\_id "TCONS\_00075231"; exon\_number "7";  
oId "CUFF.81365.4"; tss\_id "TSS57249";  
chr6 Cufflinks exon22174227 22174291 . + . gene\_id "XLOC\_045612"; transcript\_id "TCONS\_00075231"; exon\_number "8";  
oId "CUFF.81365.4"; tss\_id "TSS57249";  
chr6 Cufflinks exon22191796 22191885 . + . gene\_id "XLOC\_045612"; transcript\_id "TCONS\_00075231"; exon\_number "9";  
oId "CUFF.81365.4"; tss\_id "TSS57249";  
chr6 Cufflinks exon22194274 22206219 . + . gene\_id "XLOC\_045612"; transcript\_id "TCONS\_00075231"; exon\_number "10";  
oId "CUFF.81365.4"; tss\_id "TSS57249";

|                                        |          |   |   |   |                                                                         |
|----------------------------------------|----------|---|---|---|-------------------------------------------------------------------------|
| chr6 Cufflinks exon22044082            | 22044123 | . | + | . | gene_id "XLOC_045612"; transcript_id "TCONS_00075233"; exon_number "1"; |
| oId "CUFF.81365.5"; tss_id "TSS57250"; |          |   |   |   |                                                                         |
| chr6 Cufflinks exon22063249            | 22063469 | . | + | . | gene_id "XLOC_045612"; transcript_id "TCONS_00075233"; exon_number "2"; |
| oId "CUFF.81365.5"; tss_id "TSS57250"; |          |   |   |   |                                                                         |
| chr6 Cufflinks exon22083812            | 22083947 | . | + | . | gene_id "XLOC_045612"; transcript_id "TCONS_00075233"; exon_number "3"; |
| oId "CUFF.81365.5"; tss_id "TSS57250"; |          |   |   |   |                                                                         |
| chr6 Cufflinks exon22110976            | 22111047 | . | + | . | gene_id "XLOC_045612"; transcript_id "TCONS_00075233"; exon_number "4"; |
| oId "CUFF.81365.5"; tss_id "TSS57250"; |          |   |   |   |                                                                         |
| chr6 Cufflinks exon22146863            | 22148519 | . | + | . | gene_id "XLOC_045612"; transcript_id "TCONS_00075233"; exon_number "5"; |
| oId "CUFF.81365.5"; tss_id "TSS57250"; |          |   |   |   |                                                                         |
| chr6 Cufflinks exon22174227            | 22174291 | . | + | . | gene_id "XLOC_045612"; transcript_id "TCONS_00075233"; exon_number "6"; |
| oId "CUFF.81365.5"; tss_id "TSS57250"; |          |   |   |   |                                                                         |
| chr6 Cufflinks exon22191796            | 22191885 | . | + | . | gene_id "XLOC_045612"; transcript_id "TCONS_00075233"; exon_number "7"; |
| oId "CUFF.81365.5"; tss_id "TSS57250"; |          |   |   |   |                                                                         |
| chr6 Cufflinks exon22194274            | 22206219 | . | + | . | gene_id "XLOC_045612"; transcript_id "TCONS_00075233"; exon_number "8"; |
| oId "CUFF.81365.5"; tss_id "TSS57250"; |          |   |   |   |                                                                         |
| chr6 Cufflinks exon22146841            | 22148519 | . | + | . | gene_id "XLOC_045612"; transcript_id "TCONS_00075235"; exon_number "1"; |
| oId "CUFF.81365.7"; tss_id "TSS57252"; |          |   |   |   |                                                                         |
| chr6 Cufflinks exon22191796            | 22191885 | . | + | . | gene_id "XLOC_045612"; transcript_id "TCONS_00075235"; exon_number "2"; |
| oId "CUFF.81365.7"; tss_id "TSS57252"; |          |   |   |   |                                                                         |
| chr6 Cufflinks exon22194274            | 22201431 | . | + | . | gene_id "XLOC_045612"; transcript_id "TCONS_00075235"; exon_number "3"; |
| oId "CUFF.81365.7"; tss_id "TSS57252"; |          |   |   |   |                                                                         |
| chr6 Cufflinks exon22201471            | 22205488 | . | + | . | gene_id "XLOC_045612"; transcript_id "TCONS_00075235"; exon_number "4"; |
| oId "CUFF.81365.7"; tss_id "TSS57252"; |          |   |   |   |                                                                         |
| chr6 Cufflinks exon22206663            | 22206823 | . | + | . | gene_id "XLOC_045612"; transcript_id "TCONS_00075235"; exon_number "5"; |
| oId "CUFF.81365.7"; tss_id "TSS57252"; |          |   |   |   |                                                                         |
| chr6 Cufflinks exon22213646            | 22213663 | . | + | . | gene_id "XLOC_045612"; transcript_id "TCONS_00075235"; exon_number "6"; |
| oId "CUFF.81365.7"; tss_id "TSS57252"; |          |   |   |   |                                                                         |
| chr6 Cufflinks exon22156470            | 22157160 | . | + | . | gene_id "XLOC_045626"; transcript_id "TCONS_00075238"; exon_number "1"; |
| oId "CUFF.81389.1"; tss_id "TSS57266"; |          |   |   |   |                                                                         |
| chr6 Cufflinks exon22250852            | 22250860 | . | + | . | gene_id "XLOC_045626"; transcript_id "TCONS_00075238"; exon_number "2"; |
| oId "CUFF.81389.1"; tss_id "TSS57266"; |          |   |   |   |                                                                         |
| chr6 Cufflinks exon26285804            | 26286281 | . | + | . | gene_id "XLOC_045661"; transcript_id "TCONS_00075294"; exon_number "1"; |
| oId "CUFF.81528.1"; tss_id "TSS57307"; |          |   |   |   |                                                                         |
| chr6 Cufflinks exon26300098            | 26300215 | . | + | . | gene_id "XLOC_045661"; transcript_id "TCONS_00075294"; exon_number "2"; |
| oId "CUFF.81528.1"; tss_id "TSS57307"; |          |   |   |   |                                                                         |
| chr6 Cufflinks exon26301395            | 26301412 | . | + | . | gene_id "XLOC_045661"; transcript_id "TCONS_00075294"; exon_number "3"; |
| oId "CUFF.81528.1"; tss_id "TSS57307"; |          |   |   |   |                                                                         |
| chr6 Cufflinks exon26678233            | 26681627 | . | + | . | gene_id "XLOC_045689"; transcript_id "TCONS_00075342"; exon_number "1"; |
| oId "CUFF.81579.6"; tss_id "TSS57337"; |          |   |   |   |                                                                         |
| chr6 Cufflinks exon26683026            | 26683665 | . | + | . | gene_id "XLOC_045689"; transcript_id "TCONS_00075342"; exon_number "2"; |
| oId "CUFF.81579.6"; tss_id "TSS57337"; |          |   |   |   |                                                                         |
| chr6 Cufflinks exon27154132            | 27154160 | . | + | . | gene_id "XLOC_045698"; transcript_id "TCONS_00075354"; exon_number "1"; |

|                                                                                |       |                                                                         |
|--------------------------------------------------------------------------------|-------|-------------------------------------------------------------------------|
| oId "CUFF.81625.1"; tss_id "TSS57349";<br>chr6 Cufflinks exon27155814 27155965 | . + . | gene_id "XLOC_045698"; transcript_id "TCONS_00075354"; exon_number "2"; |
| oId "CUFF.81625.1"; tss_id "TSS57349";<br>chr6 Cufflinks exon27183062 27183200 | . + . | gene_id "XLOC_045698"; transcript_id "TCONS_00075354"; exon_number "3"; |
| oId "CUFF.81625.1"; tss_id "TSS57349";<br>chr6 Cufflinks exon27185076 27187853 | . + . | gene_id "XLOC_045698"; transcript_id "TCONS_00075354"; exon_number "4"; |
| oId "CUFF.81625.1"; tss_id "TSS57349";<br>chr6 Cufflinks exon27154183 27154278 | . + . | gene_id "XLOC_045698"; transcript_id "TCONS_00075355"; exon_number "1"; |
| oId "CUFF.81625.2"; tss_id "TSS57349";<br>chr6 Cufflinks exon27155814 27155965 | . + . | gene_id "XLOC_045698"; transcript_id "TCONS_00075355"; exon_number "2"; |
| oId "CUFF.81625.2"; tss_id "TSS57349";<br>chr6 Cufflinks exon27183062 27183200 | . + . | gene_id "XLOC_045698"; transcript_id "TCONS_00075355"; exon_number "3"; |
| oId "CUFF.81625.2"; tss_id "TSS57349";<br>chr6 Cufflinks exon27185487 27187853 | . + . | gene_id "XLOC_045698"; transcript_id "TCONS_00075355"; exon_number "4"; |
| oId "CUFF.81625.2"; tss_id "TSS57349";<br>chr6 Cufflinks exon27154183 27154278 | . + . | gene_id "XLOC_045698"; transcript_id "TCONS_00075356"; exon_number "1"; |
| oId "CUFF.81625.3"; tss_id "TSS57349";<br>chr6 Cufflinks exon27155814 27155965 | . + . | gene_id "XLOC_045698"; transcript_id "TCONS_00075356"; exon_number "2"; |
| oId "CUFF.81625.3"; tss_id "TSS57349";<br>chr6 Cufflinks exon27205188 27207155 | . + . | gene_id "XLOC_045698"; transcript_id "TCONS_00075356"; exon_number "3"; |
| oId "CUFF.81625.3"; tss_id "TSS57349";<br>chr6 Cufflinks exon27661804 27662285 | . + . | gene_id "XLOC_045711"; transcript_id "TCONS_00075376"; exon_number "1"; |
| oId "CUFF.81683.1"; tss_id "TSS57364";<br>chr6 Cufflinks exon27670093 27670196 | . + . | gene_id "XLOC_045711"; transcript_id "TCONS_00075376"; exon_number "2"; |
| oId "CUFF.81683.1"; tss_id "TSS57364";<br>chr6 Cufflinks exon27675118 27675195 | . + . | gene_id "XLOC_045711"; transcript_id "TCONS_00075376"; exon_number "3"; |
| oId "CUFF.81683.1"; tss_id "TSS57364";<br>chr6 Cufflinks exon27677903 27678004 | . + . | gene_id "XLOC_045711"; transcript_id "TCONS_00075376"; exon_number "4"; |
| oId "CUFF.81683.1"; tss_id "TSS57364";<br>chr6 Cufflinks exon27678460 27679009 | . + . | gene_id "XLOC_045711"; transcript_id "TCONS_00075376"; exon_number "5"; |
| oId "CUFF.81683.1"; tss_id "TSS57364";<br>chr6 Cufflinks exon27680783 27686216 | . + . | gene_id "XLOC_045711"; transcript_id "TCONS_00075376"; exon_number "6"; |
| oId "CUFF.81683.1"; tss_id "TSS57364";<br>chr6 Cufflinks exon27661806 27662007 | . + . | gene_id "XLOC_045711"; transcript_id "TCONS_00075378"; exon_number "1"; |
| oId "CUFF.81683.5"; tss_id "TSS57364";<br>chr6 Cufflinks exon27670093 27670196 | . + . | gene_id "XLOC_045711"; transcript_id "TCONS_00075378"; exon_number "2"; |
| oId "CUFF.81683.5"; tss_id "TSS57364";<br>chr6 Cufflinks exon27678460 27679009 | . + . | gene_id "XLOC_045711"; transcript_id "TCONS_00075378"; exon_number "3"; |
| oId "CUFF.81683.5"; tss_id "TSS57364";<br>chr6 Cufflinks exon27680783 27686216 | . + . | gene_id "XLOC_045711"; transcript_id "TCONS_00075378"; exon_number "4"; |
| oId "CUFF.81683.5"; tss_id "TSS57364";<br>chr6 Cufflinks exon27661806 27662285 | . + . | gene_id "XLOC_045711"; transcript_id "TCONS_00075377"; exon_number "1"; |
| oId "CUFF.81683.3"; tss_id "TSS57364";                                         |       |                                                                         |

|                                         |          |   |   |   |                                                                         |
|-----------------------------------------|----------|---|---|---|-------------------------------------------------------------------------|
| chr6 Cufflinks exon27670093             | 27670196 | . | + | . | gene_id "XLOC_045711"; transcript_id "TCONS_00075377"; exon_number "2"; |
| oId "CUFF.81683.3"; tss_id "TSS57364";  |          |   |   |   |                                                                         |
| chr6 Cufflinks exon27677903             | 27678004 | . | + | . | gene_id "XLOC_045711"; transcript_id "TCONS_00075377"; exon_number "3"; |
| oId "CUFF.81683.3"; tss_id "TSS57364";  |          |   |   |   |                                                                         |
| chr6 Cufflinks exon27678460             | 27679009 | . | + | . | gene_id "XLOC_045711"; transcript_id "TCONS_00075377"; exon_number "4"; |
| oId "CUFF.81683.3"; tss_id "TSS57364";  |          |   |   |   |                                                                         |
| chr6 Cufflinks exon27680783             | 27686216 | . | + | . | gene_id "XLOC_045711"; transcript_id "TCONS_00075377"; exon_number "5"; |
| oId "CUFF.81683.3"; tss_id "TSS57364";  |          |   |   |   |                                                                         |
| chr6 Cufflinks exon27661812             | 27662285 | . | + | . | gene_id "XLOC_045711"; transcript_id "TCONS_00075379"; exon_number "1"; |
| oId "CUFF.81683.6"; tss_id "TSS57364";  |          |   |   |   |                                                                         |
| chr6 Cufflinks exon27670093             | 27670196 | . | + | . | gene_id "XLOC_045711"; transcript_id "TCONS_00075379"; exon_number "2"; |
| oId "CUFF.81683.6"; tss_id "TSS57364";  |          |   |   |   |                                                                         |
| chr6 Cufflinks exon27677903             | 27678004 | . | + | . | gene_id "XLOC_045711"; transcript_id "TCONS_00075379"; exon_number "3"; |
| oId "CUFF.81683.6"; tss_id "TSS57364";  |          |   |   |   |                                                                         |
| chr6 Cufflinks exon27678460             | 27678668 | . | + | . | gene_id "XLOC_045711"; transcript_id "TCONS_00075379"; exon_number "4"; |
| oId "CUFF.81683.6"; tss_id "TSS57364";  |          |   |   |   |                                                                         |
| chr6 Cufflinks exon27680783             | 27684655 | . | + | . | gene_id "XLOC_045711"; transcript_id "TCONS_00075379"; exon_number "5"; |
| oId "CUFF.81683.6"; tss_id "TSS57364";  |          |   |   |   |                                                                         |
| chr6 Cufflinks exon27685864             | 27686216 | . | + | . | gene_id "XLOC_045711"; transcript_id "TCONS_00075379"; exon_number "6"; |
| oId "CUFF.81683.6"; tss_id "TSS57364";  |          |   |   |   |                                                                         |
| chr6 Cufflinks exon27661814             | 27662005 | . | + | . | gene_id "XLOC_045711"; transcript_id "TCONS_00075381"; exon_number "1"; |
| oId "CUFF.81683.8"; tss_id "TSS57364";  |          |   |   |   |                                                                         |
| chr6 Cufflinks exon27670093             | 27670196 | . | + | . | gene_id "XLOC_045711"; transcript_id "TCONS_00075381"; exon_number "2"; |
| oId "CUFF.81683.8"; tss_id "TSS57364";  |          |   |   |   |                                                                         |
| chr6 Cufflinks exon27677903             | 27678004 | . | + | . | gene_id "XLOC_045711"; transcript_id "TCONS_00075381"; exon_number "3"; |
| oId "CUFF.81683.8"; tss_id "TSS57364";  |          |   |   |   |                                                                         |
| chr6 Cufflinks exon27678460             | 27679009 | . | + | . | gene_id "XLOC_045711"; transcript_id "TCONS_00075381"; exon_number "4"; |
| oId "CUFF.81683.8"; tss_id "TSS57364";  |          |   |   |   |                                                                         |
| chr6 Cufflinks exon27680783             | 27684655 | . | + | . | gene_id "XLOC_045711"; transcript_id "TCONS_00075381"; exon_number "5"; |
| oId "CUFF.81683.8"; tss_id "TSS57364";  |          |   |   |   |                                                                         |
| chr6 Cufflinks exon27685864             | 27686216 | . | + | . | gene_id "XLOC_045711"; transcript_id "TCONS_00075381"; exon_number "6"; |
| oId "CUFF.81683.8"; tss_id "TSS57364";  |          |   |   |   |                                                                         |
| chr6 Cufflinks exon27661814             | 27662005 | . | + | . | gene_id "XLOC_045711"; transcript_id "TCONS_00075380"; exon_number "1"; |
| oId "CUFF.81683.10"; tss_id "TSS57364"; |          |   |   |   |                                                                         |
| chr6 Cufflinks exon27667376             | 27667446 | . | + | . | gene_id "XLOC_045711"; transcript_id "TCONS_00075380"; exon_number "2"; |
| oId "CUFF.81683.10"; tss_id "TSS57364"; |          |   |   |   |                                                                         |
| chr6 Cufflinks exon27670093             | 27670196 | . | + | . | gene_id "XLOC_045711"; transcript_id "TCONS_00075380"; exon_number "3"; |
| oId "CUFF.81683.10"; tss_id "TSS57364"; |          |   |   |   |                                                                         |
| chr6 Cufflinks exon27678460             | 27679009 | . | + | . | gene_id "XLOC_045711"; transcript_id "TCONS_00075380"; exon_number "4"; |
| oId "CUFF.81683.10"; tss_id "TSS57364"; |          |   |   |   |                                                                         |
| chr6 Cufflinks exon27680783             | 27686216 | . | + | . | gene_id "XLOC_045711"; transcript_id "TCONS_00075380"; exon_number "5"; |
| oId "CUFF.81683.10"; tss_id "TSS57364"; |          |   |   |   |                                                                         |
| chr6 Cufflinks exon27725034             | 27729420 | . | + | . | gene_id "XLOC_045712"; transcript_id "TCONS_00075384"; exon_number "1"; |

|                                                                                |   |   |   |                                                                         |
|--------------------------------------------------------------------------------|---|---|---|-------------------------------------------------------------------------|
| oId "CUFF.81686.3"; tss_id "TSS57365";<br>chr6 Cufflinks exon27729504 27730142 | . | + | . | gene_id "XLOC_045712"; transcript_id "TCONS_00075384"; exon_number "2"; |
| oId "CUFF.81686.3"; tss_id "TSS57365";<br>chr6 Cufflinks exon27730299 27730966 | . | + | . | gene_id "XLOC_045712"; transcript_id "TCONS_00075384"; exon_number "3"; |
| oId "CUFF.81686.3"; tss_id "TSS57365";<br>chr6 Cufflinks exon27725034 27725520 | . | + | . | gene_id "XLOC_045712"; transcript_id "TCONS_00075383"; exon_number "1"; |
| oId "CUFF.81686.2"; tss_id "TSS57365";<br>chr6 Cufflinks exon27729504 27729620 | . | + | . | gene_id "XLOC_045712"; transcript_id "TCONS_00075383"; exon_number "2"; |
| oId "CUFF.81686.2"; tss_id "TSS57365";<br>chr6 Cufflinks exon27730081 27730966 | . | + | . | gene_id "XLOC_045712"; transcript_id "TCONS_00075383"; exon_number "3"; |
| oId "CUFF.81686.2"; tss_id "TSS57365";<br>chr6 Cufflinks exon27725034 27725311 | . | + | . | gene_id "XLOC_045712"; transcript_id "TCONS_00075382"; exon_number "1"; |
| oId "CUFF.81686.1"; tss_id "TSS57365";<br>chr6 Cufflinks exon27728319 27729620 | . | + | . | gene_id "XLOC_045712"; transcript_id "TCONS_00075382"; exon_number "2"; |
| oId "CUFF.81686.1"; tss_id "TSS57365";<br>chr6 Cufflinks exon27730081 27730142 | . | + | . | gene_id "XLOC_045712"; transcript_id "TCONS_00075382"; exon_number "3"; |
| oId "CUFF.81686.1"; tss_id "TSS57365";<br>chr6 Cufflinks exon27730299 27730966 | . | + | . | gene_id "XLOC_045712"; transcript_id "TCONS_00075382"; exon_number "4"; |
| oId "CUFF.81686.1"; tss_id "TSS57365";<br>chr6 Cufflinks exon27725205 27725520 | . | + | . | gene_id "XLOC_045712"; transcript_id "TCONS_00075385"; exon_number "1"; |
| oId "CUFF.81686.4"; tss_id "TSS57366";<br>chr6 Cufflinks exon27728319 27729620 | . | + | . | gene_id "XLOC_045712"; transcript_id "TCONS_00075385"; exon_number "2"; |
| oId "CUFF.81686.4"; tss_id "TSS57366";<br>chr6 Cufflinks exon27730081 27730142 | . | + | . | gene_id "XLOC_045712"; transcript_id "TCONS_00075385"; exon_number "3"; |
| oId "CUFF.81686.4"; tss_id "TSS57366";<br>chr6 Cufflinks exon27730299 27730966 | . | + | . | gene_id "XLOC_045712"; transcript_id "TCONS_00075385"; exon_number "4"; |
| oId "CUFF.81686.4"; tss_id "TSS57366";<br>chr6 Cufflinks exon27727295 27729620 | . | + | . | gene_id "XLOC_045712"; transcript_id "TCONS_00075386"; exon_number "1"; |
| oId "CUFF.81686.5"; tss_id "TSS57367";<br>chr6 Cufflinks exon27730081 27730142 | . | + | . | gene_id "XLOC_045712"; transcript_id "TCONS_00075386"; exon_number "2"; |
| oId "CUFF.81686.5"; tss_id "TSS57367";<br>chr6 Cufflinks exon27730299 27730966 | . | + | . | gene_id "XLOC_045712"; transcript_id "TCONS_00075386"; exon_number "3"; |
| oId "CUFF.81686.5"; tss_id "TSS57367";<br>chr6 Cufflinks exon27841302 27841770 | . | + | . | gene_id "XLOC_045727"; transcript_id "TCONS_00075410"; exon_number "1"; |
| oId "CUFF.81715.1"; tss_id "TSS57385";<br>chr6 Cufflinks exon27849797 27849863 | . | + | . | gene_id "XLOC_045727"; transcript_id "TCONS_00075410"; exon_number "2"; |
| oId "CUFF.81715.1"; tss_id "TSS57385";<br>chr6 Cufflinks exon27855377 27855534 | . | + | . | gene_id "XLOC_045727"; transcript_id "TCONS_00075410"; exon_number "3"; |
| oId "CUFF.81715.1"; tss_id "TSS57385";<br>chr6 Cufflinks exon27841345 27841770 | . | + | . | gene_id "XLOC_045727"; transcript_id "TCONS_00075411"; exon_number "1"; |
| oId "CUFF.81715.2"; tss_id "TSS57385";<br>chr6 Cufflinks exon27842034 27842409 | . | + | . | gene_id "XLOC_045727"; transcript_id "TCONS_00075411"; exon_number "2"; |
| oId "CUFF.81715.2"; tss_id "TSS57385";                                         |   |   |   |                                                                         |

|                                        |          |   |   |   |                                                                         |
|----------------------------------------|----------|---|---|---|-------------------------------------------------------------------------|
| chr6 Cufflinks exon27849797            | 27849873 | . | + | . | gene_id "XLOC_045727"; transcript_id "TCONS_00075411"; exon_number "3"; |
| oId "CUFF.81715.2"; tss_id "TSS57385"; |          |   |   |   |                                                                         |
| chr6 Cufflinks exon27851680            | 27851697 | . | + | . | gene_id "XLOC_045727"; transcript_id "TCONS_00075411"; exon_number "4"; |
| oId "CUFF.81715.2"; tss_id "TSS57385"; |          |   |   |   |                                                                         |
| chr6 Cufflinks exon30460043            | 30460106 | . | + | . | gene_id "XLOC_045801"; transcript_id "TCONS_00075523"; exon_number "1"; |
| oId "CUFF.82021.1"; tss_id "TSS57475"; |          |   |   |   |                                                                         |
| chr6 Cufflinks exon30650757            | 30651336 | . | + | . | gene_id "XLOC_045801"; transcript_id "TCONS_00075523"; exon_number "2"; |
| oId "CUFF.82021.1"; tss_id "TSS57475"; |          |   |   |   |                                                                         |
| chr6 Cufflinks exon31164205            | 31165958 | . | + | . | gene_id "XLOC_045821"; transcript_id "TCONS_00075562"; exon_number "1"; |
| oId "CUFF.82087.1"; tss_id "TSS57502"; |          |   |   |   |                                                                         |
| chr6 Cufflinks exon31170149            | 31172210 | . | + | . | gene_id "XLOC_045821"; transcript_id "TCONS_00075562"; exon_number "2"; |
| oId "CUFF.82087.1"; tss_id "TSS57502"; |          |   |   |   |                                                                         |
| chr6 Cufflinks exon31165537            | 31165659 | . | + | . | gene_id "XLOC_045821"; transcript_id "TCONS_00075563"; exon_number "1"; |
| oId "CUFF.82087.3"; tss_id "TSS57503"; |          |   |   |   |                                                                         |
| chr6 Cufflinks exon31170149            | 31172210 | . | + | . | gene_id "XLOC_045821"; transcript_id "TCONS_00075563"; exon_number "2"; |
| oId "CUFF.82087.3"; tss_id "TSS57503"; |          |   |   |   |                                                                         |
| chr6 Cufflinks exon31165888            | 31167862 | . | + | . | gene_id "XLOC_045821"; transcript_id "TCONS_00075564"; exon_number "1"; |
| oId "CUFF.82087.4"; tss_id "TSS57504"; |          |   |   |   |                                                                         |
| chr6 Cufflinks exon31170149            | 31172210 | . | + | . | gene_id "XLOC_045821"; transcript_id "TCONS_00075564"; exon_number "2"; |
| oId "CUFF.82087.4"; tss_id "TSS57504"; |          |   |   |   |                                                                         |
| chr6 Cufflinks exon31165966            | 31165977 | . | + | . | gene_id "XLOC_045821"; transcript_id "TCONS_00075565"; exon_number "1"; |
| oId "CUFF.82087.6"; tss_id "TSS57504"; |          |   |   |   |                                                                         |
| chr6 Cufflinks exon31170149            | 31172210 | . | + | . | gene_id "XLOC_045821"; transcript_id "TCONS_00075565"; exon_number "2"; |
| oId "CUFF.82087.6"; tss_id "TSS57504"; |          |   |   |   |                                                                         |
| chr6 Cufflinks exon31548604            | 31550747 | . | + | . | gene_id "XLOC_045832"; transcript_id "TCONS_00075580"; exon_number "1"; |
| oId "CUFF.82144.1"; tss_id "TSS57518"; |          |   |   |   |                                                                         |
| chr6 Cufflinks exon31553622            | 31553743 | . | + | . | gene_id "XLOC_045832"; transcript_id "TCONS_00075580"; exon_number "2"; |
| oId "CUFF.82144.1"; tss_id "TSS57518"; |          |   |   |   |                                                                         |
| chr6 Cufflinks exon32861953            | 32862803 | . | + | . | gene_id "XLOC_045866"; transcript_id "TCONS_00075634"; exon_number "1"; |
| oId "CUFF.82268.2"; tss_id "TSS57555"; |          |   |   |   |                                                                         |
| chr6 Cufflinks exon32868697            | 32871535 | . | + | . | gene_id "XLOC_045866"; transcript_id "TCONS_00075634"; exon_number "2"; |
| oId "CUFF.82268.2"; tss_id "TSS57555"; |          |   |   |   |                                                                         |
| chr6 Cufflinks exon32861953            | 32862704 | . | + | . | gene_id "XLOC_045866"; transcript_id "TCONS_00075633"; exon_number "1"; |
| oId "CUFF.82268.1"; tss_id "TSS57555"; |          |   |   |   |                                                                         |
| chr6 Cufflinks exon32868697            | 32871535 | . | + | . | gene_id "XLOC_045866"; transcript_id "TCONS_00075633"; exon_number "2"; |
| oId "CUFF.82268.1"; tss_id "TSS57555"; |          |   |   |   |                                                                         |
| chr6 Cufflinks exon33588025            | 33588213 | . | + | . | gene_id "XLOC_045886"; transcript_id "TCONS_00075672"; exon_number "1"; |
| oId "CUFF.82347.1"; tss_id "TSS57584"; |          |   |   |   |                                                                         |
| chr6 Cufflinks exon33588392            | 33589036 | . | + | . | gene_id "XLOC_045886"; transcript_id "TCONS_00075672"; exon_number "2"; |
| oId "CUFF.82347.1"; tss_id "TSS57584"; |          |   |   |   |                                                                         |
| chr6 Cufflinks exon37475124            | 37475480 | . | + | . | gene_id "XLOC_045953"; transcript_id "TCONS_00075795"; exon_number "1"; |
| oId "CUFF.82585.8"; tss_id "TSS57670"; |          |   |   |   |                                                                         |
| chr6 Cufflinks exon37502052            | 37502121 | . | + | . | gene_id "XLOC_045953"; transcript_id "TCONS_00075795"; exon_number "2"; |

|                                                                                 |   |   |   |                                                                         |
|---------------------------------------------------------------------------------|---|---|---|-------------------------------------------------------------------------|
| oId "CUFF.82585.8"; tss_id "TSS57670";<br>chr6 Cufflinks exon37502709 37502733  | . | + | . | gene_id "XLOC_045953"; transcript_id "TCONS_00075795"; exon_number "3"; |
| oId "CUFF.82585.8"; tss_id "TSS57670";<br>chr6 Cufflinks exon37503308 37509235  | . | + | . | gene_id "XLOC_045953"; transcript_id "TCONS_00075795"; exon_number "4"; |
| oId "CUFF.82585.8"; tss_id "TSS57670";<br>chr6 Cufflinks exon37484479 37484717  | . | + | . | gene_id "XLOC_045953"; transcript_id "TCONS_00075796"; exon_number "1"; |
| oId "CUFF.82585.9"; tss_id "TSS57671";<br>chr6 Cufflinks exon37502052 37502121  | . | + | . | gene_id "XLOC_045953"; transcript_id "TCONS_00075796"; exon_number "2"; |
| oId "CUFF.82585.9"; tss_id "TSS57671";<br>chr6 Cufflinks exon37502709 37502733  | . | + | . | gene_id "XLOC_045953"; transcript_id "TCONS_00075796"; exon_number "3"; |
| oId "CUFF.82585.9"; tss_id "TSS57671";<br>chr6 Cufflinks exon37503308 37509235  | . | + | . | gene_id "XLOC_045953"; transcript_id "TCONS_00075796"; exon_number "4"; |
| oId "CUFF.82585.9"; tss_id "TSS57671";<br>chr6 Cufflinks exon37484532 37484717  | . | + | . | gene_id "XLOC_045953"; transcript_id "TCONS_00075797"; exon_number "1"; |
| oId "CUFF.82585.10"; tss_id "TSS57671";<br>chr6 Cufflinks exon37502052 37502127 | . | + | . | gene_id "XLOC_045953"; transcript_id "TCONS_00075797"; exon_number "2"; |
| oId "CUFF.82585.10"; tss_id "TSS57671";<br>chr6 Cufflinks exon37502715 37502733 | . | + | . | gene_id "XLOC_045953"; transcript_id "TCONS_00075797"; exon_number "3"; |
| oId "CUFF.82585.10"; tss_id "TSS57671";<br>chr6 Cufflinks exon37503308 37509235 | . | + | . | gene_id "XLOC_045953"; transcript_id "TCONS_00075797"; exon_number "4"; |
| oId "CUFF.82585.10"; tss_id "TSS57671";<br>chr6 Cufflinks exon40346090 40346311 | . | + | . | gene_id "XLOC_045982"; transcript_id "TCONS_00075835"; exon_number "1"; |
| oId "CUFF.82695.2"; tss_id "TSS57705";<br>chr6 Cufflinks exon40346486 40346636  | . | + | . | gene_id "XLOC_045982"; transcript_id "TCONS_00075835"; exon_number "2"; |
| oId "CUFF.82695.2"; tss_id "TSS57705";<br>chr6 Cufflinks exon40347021 40347631  | . | + | . | gene_id "XLOC_045982"; transcript_id "TCONS_00075835"; exon_number "3"; |
| oId "CUFF.82695.2"; tss_id "TSS57705";<br>chr6 Cufflinks exon40346090 40346637  | . | + | . | gene_id "XLOC_045982"; transcript_id "TCONS_00075834"; exon_number "1"; |
| oId "CUFF.82695.1"; tss_id "TSS57705";<br>chr6 Cufflinks exon40347021 40347631  | . | + | . | gene_id "XLOC_045982"; transcript_id "TCONS_00075834"; exon_number "2"; |
| oId "CUFF.82695.1"; tss_id "TSS57705";<br>chr6 Cufflinks exon42420026 42422653  | . | + | . | gene_id "XLOC_046025"; transcript_id "TCONS_00075898"; exon_number "1"; |
| oId "CUFF.82848.1"; tss_id "TSS57754";<br>chr6 Cufflinks exon42423683 42423892  | . | + | . | gene_id "XLOC_046025"; transcript_id "TCONS_00075898"; exon_number "2"; |
| oId "CUFF.82848.1"; tss_id "TSS57754";<br>chr6 Cufflinks exon42424474 42424991  | . | + | . | gene_id "XLOC_046025"; transcript_id "TCONS_00075898"; exon_number "3"; |
| oId "CUFF.82848.1"; tss_id "TSS57754";<br>chr6 Cufflinks exon42420044 42423892  | . | + | . | gene_id "XLOC_046025"; transcript_id "TCONS_00075901"; exon_number "1"; |
| oId "CUFF.82848.4"; tss_id "TSS57754";<br>chr6 Cufflinks exon42424474 42424991  | . | + | . | gene_id "XLOC_046025"; transcript_id "TCONS_00075901"; exon_number "2"; |
| oId "CUFF.82848.4"; tss_id "TSS57754";<br>chr6 Cufflinks exon42420044 42422020  | . | + | . | gene_id "XLOC_046025"; transcript_id "TCONS_00075900"; exon_number "1"; |
| oId "CUFF.82848.3"; tss_id "TSS57754";                                          |   |   |   |                                                                         |



|                                        |          |   |   |   |                                                                         |
|----------------------------------------|----------|---|---|---|-------------------------------------------------------------------------|
| chr6 Cufflinks exon42423683            | 42423892 | . | + | . | gene_id "XLOC_046025"; transcript_id "TCONS_00075900"; exon_number "2"; |
| oId "CUFF.82848.3"; tss_id "TSS57754"; |          |   |   |   |                                                                         |
| chr6 Cufflinks exon42424474            | 42424991 | . | + | . | gene_id "XLOC_046025"; transcript_id "TCONS_00075900"; exon_number "3"; |
| oId "CUFF.82848.3"; tss_id "TSS57754"; |          |   |   |   |                                                                         |
| chr6 Cufflinks exon42420083            | 42420095 | . | + | . | gene_id "XLOC_046025"; transcript_id "TCONS_00075902"; exon_number "1"; |
| oId "CUFF.82848.5"; tss_id "TSS57754"; |          |   |   |   |                                                                         |
| chr6 Cufflinks exon42421955            | 42422020 | . | + | . | gene_id "XLOC_046025"; transcript_id "TCONS_00075902"; exon_number "2"; |
| oId "CUFF.82848.5"; tss_id "TSS57754"; |          |   |   |   |                                                                         |
| chr6 Cufflinks exon42422518            | 42422653 | . | + | . | gene_id "XLOC_046025"; transcript_id "TCONS_00075902"; exon_number "3"; |
| oId "CUFF.82848.5"; tss_id "TSS57754"; |          |   |   |   |                                                                         |
| chr6 Cufflinks exon42423683            | 42423892 | . | + | . | gene_id "XLOC_046025"; transcript_id "TCONS_00075902"; exon_number "4"; |
| oId "CUFF.82848.5"; tss_id "TSS57754"; |          |   |   |   |                                                                         |
| chr6 Cufflinks exon42424474            | 42424991 | . | + | . | gene_id "XLOC_046025"; transcript_id "TCONS_00075902"; exon_number "5"; |
| oId "CUFF.82848.5"; tss_id "TSS57754"; |          |   |   |   |                                                                         |
| chr6 Cufflinks exon42420101            | 42420516 | . | + | . | gene_id "XLOC_046025"; transcript_id "TCONS_00075903"; exon_number "1"; |
| oId "CUFF.82848.6"; tss_id "TSS57754"; |          |   |   |   |                                                                         |
| chr6 Cufflinks exon42421955            | 42424991 | . | + | . | gene_id "XLOC_046025"; transcript_id "TCONS_00075903"; exon_number "2"; |
| oId "CUFF.82848.6"; tss_id "TSS57754"; |          |   |   |   |                                                                         |
| chr6 Cufflinks exon44042973            | 44043096 | . | + | . | gene_id "XLOC_046071"; transcript_id "TCONS_00075993"; exon_number "1"; |
| oId "CUFF.82978.1"; tss_id "TSS57813"; |          |   |   |   |                                                                         |
| chr6 Cufflinks exon44043657            | 44043750 | . | + | . | gene_id "XLOC_046071"; transcript_id "TCONS_00075993"; exon_number "2"; |
| oId "CUFF.82978.1"; tss_id "TSS57813"; |          |   |   |   |                                                                         |
| chr6 Cufflinks exon44049171            | 44049974 | . | + | . | gene_id "XLOC_046071"; transcript_id "TCONS_00075993"; exon_number "3"; |
| oId "CUFF.82978.1"; tss_id "TSS57813"; |          |   |   |   |                                                                         |
| chr6 Cufflinks exon44050738            | 44051031 | . | + | . | gene_id "XLOC_046074"; transcript_id "TCONS_00075996"; exon_number "1"; |
| oId "CUFF.82982.1"; tss_id "TSS57816"; |          |   |   |   |                                                                         |
| chr6 Cufflinks exon44052004            | 44054828 | . | + | . | gene_id "XLOC_046074"; transcript_id "TCONS_00075996"; exon_number "2"; |
| oId "CUFF.82982.1"; tss_id "TSS57816"; |          |   |   |   |                                                                         |
| chr6 Cufflinks exon44050855            | 44051031 | . | + | . | gene_id "XLOC_046074"; transcript_id "TCONS_00075997"; exon_number "1"; |
| oId "CUFF.82982.2"; tss_id "TSS57817"; |          |   |   |   |                                                                         |
| chr6 Cufflinks exon44051921            | 44051952 | . | + | . | gene_id "XLOC_046074"; transcript_id "TCONS_00075997"; exon_number "2"; |
| oId "CUFF.82982.2"; tss_id "TSS57817"; |          |   |   |   |                                                                         |
| chr6 Cufflinks exon52442000            | 52443392 | . | + | . | gene_id "XLOC_046114"; transcript_id "TCONS_00076070"; exon_number "1"; |
| oId "CUFF.83123.5"; tss_id "TSS57869"; |          |   |   |   |                                                                         |
| chr6 Cufflinks exon52444173            | 52444407 | . | + | . | gene_id "XLOC_046114"; transcript_id "TCONS_00076070"; exon_number "2"; |
| oId "CUFF.83123.5"; tss_id "TSS57869"; |          |   |   |   |                                                                         |
| chr6 Cufflinks exon52447661            | 52448798 | . | + | . | gene_id "XLOC_046114"; transcript_id "TCONS_00076070"; exon_number "3"; |
| oId "CUFF.83123.5"; tss_id "TSS57869"; |          |   |   |   |                                                                         |
| chr6 Cufflinks exon52442000            | 52443191 | . | + | . | gene_id "XLOC_046114"; transcript_id "TCONS_00076069"; exon_number "1"; |
| oId "CUFF.83123.2"; tss_id "TSS57869"; |          |   |   |   |                                                                         |
| chr6 Cufflinks exon52444173            | 52444407 | . | + | . | gene_id "XLOC_046114"; transcript_id "TCONS_00076069"; exon_number "2"; |
| oId "CUFF.83123.2"; tss_id "TSS57869"; |          |   |   |   |                                                                         |
| chr6 Cufflinks exon52447661            | 52448798 | . | + | . | gene_id "XLOC_046114"; transcript_id "TCONS_00076069"; exon_number "3"; |

oId "CUFF.83123.2"; tss\_id "TSS57869";  
chr6 Cufflinks exon52442000 52442449 . + . gene\_id "XLOC\_046114"; transcript\_id "TCONS\_00076071"; exon\_number "1";  
oId "CUFF.83123.4"; tss\_id "TSS57869";  
chr6 Cufflinks exon52442848 52443392 . + . gene\_id "XLOC\_046114"; transcript\_id "TCONS\_00076071"; exon\_number "2";  
oId "CUFF.83123.4"; tss\_id "TSS57869";  
chr6 Cufflinks exon52444173 52444407 . + . gene\_id "XLOC\_046114"; transcript\_id "TCONS\_00076071"; exon\_number "3";  
oId "CUFF.83123.4"; tss\_id "TSS57869";  
chr6 Cufflinks exon52453050 52454965 . + . gene\_id "XLOC\_046114"; transcript\_id "TCONS\_00076071"; exon\_number "4";  
oId "CUFF.83123.4"; tss\_id "TSS57869";  
chr6 Cufflinks exon52529199 52530217 . + . gene\_id "XLOC\_046116"; transcript\_id "TCONS\_00076074"; exon\_number "1";  
oId "CUFF.83127.2"; tss\_id "TSS57871";  
chr6 Cufflinks exon52531187 52531316 . + . gene\_id "XLOC\_046116"; transcript\_id "TCONS\_00076074"; exon\_number "2";  
oId "CUFF.83127.2"; tss\_id "TSS57871";  
chr6 Cufflinks exon52531547 52533951 . + . gene\_id "XLOC\_046116"; transcript\_id "TCONS\_00076074"; exon\_number "3";  
oId "CUFF.83127.2"; tss\_id "TSS57871";  
chr6 Cufflinks exon52529199 52530217 . + . gene\_id "XLOC\_046116"; transcript\_id "TCONS\_00076073"; exon\_number "1";  
oId "CUFF.83127.1"; tss\_id "TSS57871";  
chr6 Cufflinks exon52531187 52533951 . + . gene\_id "XLOC\_046116"; transcript\_id "TCONS\_00076073"; exon\_number "2";  
oId "CUFF.83127.1"; tss\_id "TSS57871";  
chr6 Cufflinks exon58287906 58288526 . + . gene\_id "XLOC\_046148"; transcript\_id "TCONS\_00076128"; exon\_number "1";  
oId "CUFF.83286.3"; tss\_id "TSS57909";  
chr6 Cufflinks exon58297873 58297934 . + . gene\_id "XLOC\_046148"; transcript\_id "TCONS\_00076128"; exon\_number "2";  
oId "CUFF.83286.3"; tss\_id "TSS57909";  
chr6 Cufflinks exon58298372 58299931 . + . gene\_id "XLOC\_046148"; transcript\_id "TCONS\_00076128"; exon\_number "3";  
oId "CUFF.83286.3"; tss\_id "TSS57909";  
chr6 Cufflinks exon58287906 58288020 . + . gene\_id "XLOC\_046148"; transcript\_id "TCONS\_00076127"; exon\_number "1";  
oId "CUFF.83286.2"; tss\_id "TSS57909";  
chr6 Cufflinks exon58297873 58297934 . + . gene\_id "XLOC\_046148"; transcript\_id "TCONS\_00076127"; exon\_number "2";  
oId "CUFF.83286.2"; tss\_id "TSS57909";  
chr6 Cufflinks exon58298372 58299931 . + . gene\_id "XLOC\_046148"; transcript\_id "TCONS\_00076127"; exon\_number "3";  
oId "CUFF.83286.2"; tss\_id "TSS57909";  
chr6 Cufflinks exon58287906 58288020 . + . gene\_id "XLOC\_046148"; transcript\_id "TCONS\_00076126"; exon\_number "1";  
oId "CUFF.83286.1"; tss\_id "TSS57909";  
chr6 Cufflinks exon58297873 58297942 . + . gene\_id "XLOC\_046148"; transcript\_id "TCONS\_00076126"; exon\_number "2";  
oId "CUFF.83286.1"; tss\_id "TSS57909";  
chr6 Cufflinks exon58298380 58299931 . + . gene\_id "XLOC\_046148"; transcript\_id "TCONS\_00076126"; exon\_number "3";  
oId "CUFF.83286.1"; tss\_id "TSS57909";  
chr6 Cufflinks exon58287907 58288020 . + . gene\_id "XLOC\_046148"; transcript\_id "TCONS\_00076129"; exon\_number "1";  
oId "CUFF.83286.5"; tss\_id "TSS57909";  
chr6 Cufflinks exon58288459 58288526 . + . gene\_id "XLOC\_046148"; transcript\_id "TCONS\_00076129"; exon\_number "2";  
oId "CUFF.83286.5"; tss\_id "TSS57909";  
chr6 Cufflinks exon58297873 58297934 . + . gene\_id "XLOC\_046148"; transcript\_id "TCONS\_00076129"; exon\_number "3";  
oId "CUFF.83286.5"; tss\_id "TSS57909";

|                                        |          |   |   |   |                                                                         |
|----------------------------------------|----------|---|---|---|-------------------------------------------------------------------------|
| chr6 Cufflinks exon58298372            | 58299931 | . | + | . | gene_id "XLOC_046148"; transcript_id "TCONS_00076129"; exon_number "4"; |
| oId "CUFF.83286.5"; tss_id "TSS57909"; |          |   |   |   |                                                                         |
| chr6 Cufflinks exon58287917            | 58288020 | . | + | . | gene_id "XLOC_046148"; transcript_id "TCONS_00076130"; exon_number "1"; |
| oId "CUFF.83286.6"; tss_id "TSS57909"; |          |   |   |   |                                                                         |
| chr6 Cufflinks exon58288459            | 58288526 | . | + | . | gene_id "XLOC_046148"; transcript_id "TCONS_00076130"; exon_number "2"; |
| oId "CUFF.83286.6"; tss_id "TSS57909"; |          |   |   |   |                                                                         |
| chr6 Cufflinks exon58297873            | 58297938 | . | + | . | gene_id "XLOC_046148"; transcript_id "TCONS_00076130"; exon_number "3"; |
| oId "CUFF.83286.6"; tss_id "TSS57909"; |          |   |   |   |                                                                         |
| chr6 Cufflinks exon58298376            | 58299931 | . | + | . | gene_id "XLOC_046148"; transcript_id "TCONS_00076130"; exon_number "4"; |
| oId "CUFF.83286.6"; tss_id "TSS57909"; |          |   |   |   |                                                                         |
| chr6 Cufflinks exon58291882            | 58292021 | . | + | . | gene_id "XLOC_046148"; transcript_id "TCONS_00076132"; exon_number "1"; |
| oId "CUFF.83286.8"; tss_id "TSS57911"; |          |   |   |   |                                                                         |
| chr6 Cufflinks exon58297873            | 58297934 | . | + | . | gene_id "XLOC_046148"; transcript_id "TCONS_00076132"; exon_number "2"; |
| oId "CUFF.83286.8"; tss_id "TSS57911"; |          |   |   |   |                                                                         |
| chr6 Cufflinks exon58298372            | 58299931 | . | + | . | gene_id "XLOC_046148"; transcript_id "TCONS_00076132"; exon_number "3"; |
| oId "CUFF.83286.8"; tss_id "TSS57911"; |          |   |   |   |                                                                         |
| chr6 Cufflinks exon58293696            | 58297434 | . | + | . | gene_id "XLOC_046148"; transcript_id "TCONS_00076133"; exon_number "1"; |
| oId "CUFF.83286.9"; tss_id "TSS57912"; |          |   |   |   |                                                                         |
| chr6 Cufflinks exon58297873            | 58297943 | . | + | . | gene_id "XLOC_046148"; transcript_id "TCONS_00076133"; exon_number "2"; |
| oId "CUFF.83286.9"; tss_id "TSS57912"; |          |   |   |   |                                                                         |
| chr6 Cufflinks exon58298381            | 58299931 | . | + | . | gene_id "XLOC_046148"; transcript_id "TCONS_00076133"; exon_number "3"; |
| oId "CUFF.83286.9"; tss_id "TSS57912"; |          |   |   |   |                                                                         |
| chr6 Cufflinks exon71296626            | 71296644 | . | + | . | gene_id "XLOC_046172"; transcript_id "TCONS_00076168"; exon_number "1"; |
| oId "CUFF.83357.2"; tss_id "TSS57939"; |          |   |   |   |                                                                         |
| chr6 Cufflinks exon71305358            | 71308063 | . | + | . | gene_id "XLOC_046172"; transcript_id "TCONS_00076168"; exon_number "2"; |
| oId "CUFF.83357.2"; tss_id "TSS57939"; |          |   |   |   |                                                                         |
| chr6 Cufflinks exon75994720            | 76000737 | . | + | . | gene_id "XLOC_046188"; transcript_id "TCONS_00076194"; exon_number "1"; |
| oId "CUFF.83452.1"; tss_id "TSS57958"; |          |   |   |   |                                                                         |
| chr6 Cufflinks exon76003209            | 76003310 | . | + | . | gene_id "XLOC_046188"; transcript_id "TCONS_00076194"; exon_number "2"; |
| oId "CUFF.83452.1"; tss_id "TSS57958"; |          |   |   |   |                                                                         |
| chr6 Cufflinks exon76006237            | 76007332 | . | + | . | gene_id "XLOC_046188"; transcript_id "TCONS_00076194"; exon_number "3"; |
| oId "CUFF.83452.1"; tss_id "TSS57958"; |          |   |   |   |                                                                         |
| chr6 Cufflinks exon75994729            | 75995025 | . | + | . | gene_id "XLOC_046188"; transcript_id "TCONS_00076195"; exon_number "1"; |
| oId "CUFF.83452.2"; tss_id "TSS57958"; |          |   |   |   |                                                                         |
| chr6 Cufflinks exon75996566            | 76000737 | . | + | . | gene_id "XLOC_046188"; transcript_id "TCONS_00076195"; exon_number "2"; |
| oId "CUFF.83452.2"; tss_id "TSS57958"; |          |   |   |   |                                                                         |
| chr6 Cufflinks exon76001391            | 76001945 | . | + | . | gene_id "XLOC_046188"; transcript_id "TCONS_00076195"; exon_number "3"; |
| oId "CUFF.83452.2"; tss_id "TSS57958"; |          |   |   |   |                                                                         |
| chr6 Cufflinks exon75994730            | 75995025 | . | + | . | gene_id "XLOC_046188"; transcript_id "TCONS_00076196"; exon_number "1"; |
| oId "CUFF.83452.4"; tss_id "TSS57958"; |          |   |   |   |                                                                         |
| chr6 Cufflinks exon75999970            | 76000054 | . | + | . | gene_id "XLOC_046188"; transcript_id "TCONS_00076196"; exon_number "2"; |
| oId "CUFF.83452.4"; tss_id "TSS57958"; |          |   |   |   |                                                                         |
| chr6 Cufflinks exon76000665            | 76001945 | . | + | . | gene_id "XLOC_046188"; transcript_id "TCONS_00076196"; exon_number "3"; |

oId "CUFF.83452.4"; tss\_id "TSS57958";  
chr6 Cufflinks exon75994730 75995025 . + . gene\_id "XLOC\_046188"; transcript\_id "TCONS\_00076197"; exon\_number "1";  
oId "CUFF.83452.3"; tss\_id "TSS57958";  
chr6 Cufflinks exon75999970 76000054 . + . gene\_id "XLOC\_046188"; transcript\_id "TCONS\_00076197"; exon\_number "2";  
oId "CUFF.83452.3"; tss\_id "TSS57958";  
chr6 Cufflinks exon76000665 76000737 . + . gene\_id "XLOC\_046188"; transcript\_id "TCONS\_00076197"; exon\_number "3";  
oId "CUFF.83452.3"; tss\_id "TSS57958";  
chr6 Cufflinks exon76003209 76003310 . + . gene\_id "XLOC\_046188"; transcript\_id "TCONS\_00076197"; exon\_number "4";  
oId "CUFF.83452.3"; tss\_id "TSS57958";  
chr6 Cufflinks exon76006237 76007332 . + . gene\_id "XLOC\_046188"; transcript\_id "TCONS\_00076197"; exon\_number "5";  
oId "CUFF.83452.3"; tss\_id "TSS57958";  
chr6 Cufflinks exon 75999097 75999820 . + . gene\_id "XLOC\_046188"; transcript\_id "TCONS\_00076199";  
exon\_number "1"; oId "CUFF.83452.6"; tss\_id "TSS57960";  
chr6 Cufflinks exon 75999970 76000054 . + . gene\_id "XLOC\_046188"; transcript\_id "TCONS\_00076199";  
exon\_number "2"; oId "CUFF.83452.6"; tss\_id "TSS57960";  
chr6 Cufflinks exon 76000665 76000737 . + . gene\_id "XLOC\_046188"; transcript\_id "TCONS\_00076199";  
exon\_number "3"; oId "CUFF.83452.6"; tss\_id "TSS57960";  
chr6 Cufflinks exon 76003209 76003310 . + . gene\_id "XLOC\_046188"; transcript\_id "TCONS\_00076199";  
exon\_number "4"; oId "CUFF.83452.6"; tss\_id "TSS57960";  
chr6 Cufflinks exon 76006237 76007332 . + . gene\_id "XLOC\_046188"; transcript\_id "TCONS\_00076199";  
exon\_number "5"; oId "CUFF.83452.6"; tss\_id "TSS57960";  
chr6 Cufflinks exon 81128044 81128099 . + . gene\_id "XLOC\_046225"; transcript\_id "TCONS\_00076252";  
exon\_number "1"; oId "CUFF.83585.1"; tss\_id "TSS58004";  
chr6 Cufflinks exon 81150435 81153255 . + . gene\_id "XLOC\_046225"; transcript\_id "TCONS\_00076252";  
exon\_number "2"; oId "CUFF.83585.1"; tss\_id "TSS58004";  
chr6 Cufflinks exon 81162874 81162978 . + . gene\_id "XLOC\_046225"; transcript\_id "TCONS\_00076252";  
exon\_number "3"; oId "CUFF.83585.1"; tss\_id "TSS58004";  
chr6 Cufflinks exon 81172589 81172789 . + . gene\_id "XLOC\_046225"; transcript\_id "TCONS\_00076252";  
exon\_number "4"; oId "CUFF.83585.1"; tss\_id "TSS58004";  
chr6 Cufflinks exon 81175464 81178799 . + . gene\_id "XLOC\_046225"; transcript\_id "TCONS\_00076252";  
exon\_number "5"; oId "CUFF.83585.1"; tss\_id "TSS58004";  
chr6 Cufflinks exon 91182646 91183048 . + . gene\_id "XLOC\_046278"; transcript\_id "TCONS\_00076330";  
exon\_number "1"; oId "CUFF.83814.2"; tss\_id "TSS58063";  
chr6 Cufflinks exon 91184099 91184289 . + . gene\_id "XLOC\_046278"; transcript\_id "TCONS\_00076330";  
exon\_number "2"; oId "CUFF.83814.2"; tss\_id "TSS58063";  
chr6 Cufflinks exon 91187906 91188396 . + . gene\_id "XLOC\_046278"; transcript\_id "TCONS\_00076330";  
exon\_number "3"; oId "CUFF.83814.2"; tss\_id "TSS58063";  
chr6 Cufflinks exon 91182646 91183048 . + . gene\_id "XLOC\_046278"; transcript\_id "TCONS\_00076329";  
exon\_number "1"; oId "CUFF.83814.1"; tss\_id "TSS58063";  
chr6 Cufflinks exon 91184099 91184289 . + . gene\_id "XLOC\_046278"; transcript\_id "TCONS\_00076329";  
exon\_number "2"; oId "CUFF.83814.1"; tss\_id "TSS58063";  
chr6 Cufflinks exon 91187904 91188396 . + . gene\_id "XLOC\_046278"; transcript\_id "TCONS\_00076329";  
exon\_number "3"; oId "CUFF.83814.1"; tss\_id "TSS58063";

|                                                         |      |           |           |   |   |   |                                                        |
|---------------------------------------------------------|------|-----------|-----------|---|---|---|--------------------------------------------------------|
| chr6 Cufflinks                                          | exon | 91182669  | 91183048  | . | + | . | gene_id "XLOC_046278"; transcript_id "TCONS_00076331"; |
| exon_number "1"; oId "CUFF.83814.3"; tss_id "TSS58063"; |      |           |           |   |   |   |                                                        |
| chr6 Cufflinks                                          | exon | 91183299  | 91183444  | . | + | . | gene_id "XLOC_046278"; transcript_id "TCONS_00076331"; |
| exon_number "2"; oId "CUFF.83814.3"; tss_id "TSS58063"; |      |           |           |   |   |   |                                                        |
| chr6 Cufflinks                                          | exon | 91182669  | 91183048  | . | + | . | gene_id "XLOC_046278"; transcript_id "TCONS_00076332"; |
| exon_number "1"; oId "CUFF.83814.4"; tss_id "TSS58063"; |      |           |           |   |   |   |                                                        |
| chr6 Cufflinks                                          | exon | 91187906  | 91188396  | . | + | . | gene_id "XLOC_046278"; transcript_id "TCONS_00076332"; |
| exon_number "2"; oId "CUFF.83814.4"; tss_id "TSS58063"; |      |           |           |   |   |   |                                                        |
| chr6 Cufflinks                                          | exon | 91182669  | 91182847  | . | + | . | gene_id "XLOC_046278"; transcript_id "TCONS_00076333"; |
| exon_number "1"; oId "CUFF.83814.5"; tss_id "TSS58063"; |      |           |           |   |   |   |                                                        |
| chr6 Cufflinks                                          | exon | 91182967  | 91183048  | . | + | . | gene_id "XLOC_046278"; transcript_id "TCONS_00076333"; |
| exon_number "2"; oId "CUFF.83814.5"; tss_id "TSS58063"; |      |           |           |   |   |   |                                                        |
| chr6 Cufflinks                                          | exon | 91192505  | 91193345  | . | + | . | gene_id "XLOC_046278"; transcript_id "TCONS_00076333"; |
| exon_number "3"; oId "CUFF.83814.5"; tss_id "TSS58063"; |      |           |           |   |   |   |                                                        |
| chr6 Cufflinks                                          | exon | 91183983  | 91184289  | . | + | . | gene_id "XLOC_046278"; transcript_id "TCONS_00076334"; |
| exon_number "1"; oId "CUFF.83814.6"; tss_id "TSS58064"; |      |           |           |   |   |   |                                                        |
| chr6 Cufflinks                                          | exon | 91188821  | 91188985  | . | + | . | gene_id "XLOC_046278"; transcript_id "TCONS_00076334"; |
| exon_number "2"; oId "CUFF.83814.6"; tss_id "TSS58064"; |      |           |           |   |   |   |                                                        |
| chr6 Cufflinks                                          | exon | 91192505  | 91193345  | . | + | . | gene_id "XLOC_046278"; transcript_id "TCONS_00076334"; |
| exon_number "3"; oId "CUFF.83814.6"; tss_id "TSS58064"; |      |           |           |   |   |   |                                                        |
| chr6 Cufflinks                                          | exon | 91297058  | 91297466  | . | + | . | gene_id "XLOC_046280"; transcript_id "TCONS_00076336"; |
| exon_number "1"; oId "CUFF.83826.1"; tss_id "TSS58066"; |      |           |           |   |   |   |                                                        |
| chr6 Cufflinks                                          | exon | 91297602  | 91297701  | . | + | . | gene_id "XLOC_046280"; transcript_id "TCONS_00076336"; |
| exon_number "2"; oId "CUFF.83826.1"; tss_id "TSS58066"; |      |           |           |   |   |   |                                                        |
| chr6 Cufflinks                                          | exon | 91297058  | 91297467  | . | + | . | gene_id "XLOC_046280"; transcript_id "TCONS_00076337"; |
| exon_number "1"; oId "CUFF.83826.2"; tss_id "TSS58066"; |      |           |           |   |   |   |                                                        |
| chr6 Cufflinks                                          | exon | 91297602  | 91297675  | . | + | . | gene_id "XLOC_046280"; transcript_id "TCONS_00076337"; |
| exon_number "2"; oId "CUFF.83826.2"; tss_id "TSS58066"; |      |           |           |   |   |   |                                                        |
| chr6 Cufflinks                                          | exon | 91300368  | 91300628  | . | + | . | gene_id "XLOC_046280"; transcript_id "TCONS_00076337"; |
| exon_number "3"; oId "CUFF.83826.2"; tss_id "TSS58066"; |      |           |           |   |   |   |                                                        |
| chr6 Cufflinks                                          | exon | 110796570 | 110796865 | . | + | . | gene_id "XLOC_046381"; transcript_id "TCONS_00076496"; |
| exon_number "1"; oId "CUFF.84194.1"; tss_id "TSS58189"; |      |           |           |   |   |   |                                                        |
| chr6 Cufflinks                                          | exon | 110797154 | 110798801 | . | + | . | gene_id "XLOC_046381"; transcript_id "TCONS_00076496"; |
| exon_number "2"; oId "CUFF.84194.1"; tss_id "TSS58189"; |      |           |           |   |   |   |                                                        |
| chr6 Cufflinks                                          | exon | 111255507 | 111255812 | . | + | . | gene_id "XLOC_046384"; transcript_id "TCONS_00076499"; |
| exon_number "1"; oId "CUFF.84213.1"; tss_id "TSS58192"; |      |           |           |   |   |   |                                                        |
| chr6 Cufflinks                                          | exon | 111260482 | 111260933 | . | + | . | gene_id "XLOC_046384"; transcript_id "TCONS_00076499"; |
| exon_number "2"; oId "CUFF.84213.1"; tss_id "TSS58192"; |      |           |           |   |   |   |                                                        |
| chr6 Cufflinks                                          | exon | 113309536 | 113309547 | . | + | . | gene_id "XLOC_046440"; transcript_id "TCONS_00076576"; |
| exon_number "1"; oId "CUFF.84343.2"; tss_id "TSS58252"; |      |           |           |   |   |   |                                                        |
| chr6 Cufflinks                                          | exon | 113318639 | 113318705 | . | + | . | gene_id "XLOC_046440"; transcript_id "TCONS_00076576"; |
| exon_number "2"; oId "CUFF.84343.2"; tss_id "TSS58252"; |      |           |           |   |   |   |                                                        |
| chr6 Cufflinks                                          | exon | 113319961 | 113321196 | . | + | . | gene_id "XLOC_046440"; transcript_id "TCONS_00076576"; |

exon\_number "3"; oId "CUFF.84343.2"; tss\_id "TSS58252";  
chr6 Cufflinks exon 114290865 114291442 . + . gene\_id "XLOC\_046448"; transcript\_id "TCONS\_00076584";  
exon\_number "1"; oId "CUFF.84371.6"; tss\_id "TSS58260";  
chr6 Cufflinks exon 114313057 114313182 . + . gene\_id "XLOC\_046448"; transcript\_id "TCONS\_00076584";  
exon\_number "2"; oId "CUFF.84371.6"; tss\_id "TSS58260";  
chr6 Cufflinks exon 114314507 114314651 . + . gene\_id "XLOC\_046448"; transcript\_id "TCONS\_00076584";  
exon\_number "3"; oId "CUFF.84371.6"; tss\_id "TSS58260";  
chr6 Cufflinks exon 114316764 114317224 . + . gene\_id "XLOC\_046448"; transcript\_id "TCONS\_00076584";  
exon\_number "4"; oId "CUFF.84371.6"; tss\_id "TSS58260";  
chr6 Cufflinks exon 114340076 114340286 . + . gene\_id "XLOC\_046448"; transcript\_id "TCONS\_00076584";  
exon\_number "5"; oId "CUFF.84371.6"; tss\_id "TSS58260";  
chr6 Cufflinks exon 114290865 114291442 . + . gene\_id "XLOC\_046448"; transcript\_id "TCONS\_00076585";  
exon\_number "1"; oId "CUFF.84371.1"; tss\_id "TSS58260";  
chr6 Cufflinks exon 114313057 114313178 . + . gene\_id "XLOC\_046448"; transcript\_id "TCONS\_00076585";  
exon\_number "2"; oId "CUFF.84371.1"; tss\_id "TSS58260";  
chr6 Cufflinks exon 114314507 114314651 . + . gene\_id "XLOC\_046448"; transcript\_id "TCONS\_00076585";  
exon\_number "3"; oId "CUFF.84371.1"; tss\_id "TSS58260";  
chr6 Cufflinks exon 114316764 114317224 . + . gene\_id "XLOC\_046448"; transcript\_id "TCONS\_00076585";  
exon\_number "4"; oId "CUFF.84371.1"; tss\_id "TSS58260";  
chr6 Cufflinks exon 114342211 114342396 . + . gene\_id "XLOC\_046448"; transcript\_id "TCONS\_00076585";  
exon\_number "5"; oId "CUFF.84371.1"; tss\_id "TSS58260";  
chr6 Cufflinks exon 114290865 114291442 . + . gene\_id "XLOC\_046448"; transcript\_id "TCONS\_00076586";  
exon\_number "1"; oId "CUFF.84371.2"; tss\_id "TSS58260";  
chr6 Cufflinks exon 114313057 114313182 . + . gene\_id "XLOC\_046448"; transcript\_id "TCONS\_00076586";  
exon\_number "2"; oId "CUFF.84371.2"; tss\_id "TSS58260";  
chr6 Cufflinks exon 114314507 114314651 . + . gene\_id "XLOC\_046448"; transcript\_id "TCONS\_00076586";  
exon\_number "3"; oId "CUFF.84371.2"; tss\_id "TSS58260";  
chr6 Cufflinks exon 114316764 114317224 . + . gene\_id "XLOC\_046448"; transcript\_id "TCONS\_00076586";  
exon\_number "4"; oId "CUFF.84371.2"; tss\_id "TSS58260";  
chr6 Cufflinks exon 114367989 114368039 . + . gene\_id "XLOC\_046448"; transcript\_id "TCONS\_00076586";  
exon\_number "5"; oId "CUFF.84371.2"; tss\_id "TSS58260";  
chr6 Cufflinks exon 114290865 114291442 . + . gene\_id "XLOC\_046448"; transcript\_id "TCONS\_00076589";  
exon\_number "1"; oId "CUFF.84371.5"; tss\_id "TSS58260";  
chr6 Cufflinks exon 114313057 114313351 . + . gene\_id "XLOC\_046448"; transcript\_id "TCONS\_00076589";  
exon\_number "2"; oId "CUFF.84371.5"; tss\_id "TSS58260";  
chr6 Cufflinks exon 114314507 114314651 . + . gene\_id "XLOC\_046448"; transcript\_id "TCONS\_00076589";  
exon\_number "3"; oId "CUFF.84371.5"; tss\_id "TSS58260";  
chr6 Cufflinks exon 114316764 114317224 . + . gene\_id "XLOC\_046448"; transcript\_id "TCONS\_00076589";  
exon\_number "4"; oId "CUFF.84371.5"; tss\_id "TSS58260";  
chr6 Cufflinks exon 114410101 114410183 . + . gene\_id "XLOC\_046448"; transcript\_id "TCONS\_00076589";  
exon\_number "5"; oId "CUFF.84371.5"; tss\_id "TSS58260";  
chr6 Cufflinks exon 114437282 114437344 . + . gene\_id "XLOC\_046448"; transcript\_id "TCONS\_00076589";  
exon\_number "6"; oId "CUFF.84371.5"; tss\_id "TSS58260";

chr6 Cufflinks exon 114499817 114499884 . + . gene\_id "XLOC\_046448"; transcript\_id "TCONS\_00076589";  
exon\_number "7"; oId "CUFF.84371.5"; tss\_id "TSS58260";  
chr6 Cufflinks exon 114500189 114500321 . + . gene\_id "XLOC\_046448"; transcript\_id "TCONS\_00076589"; exon\_number "8";  
oId "CUFF.84371.5"; tss\_id "TSS58260";  
chr6 Cufflinks exon 114556794 114556935 . + . gene\_id "XLOC\_046448"; transcript\_id "TCONS\_00076589"; exon\_number "9";  
oId "CUFF.84371.5"; tss\_id "TSS58260";  
chr6 Cufflinks exon 114661686 114661893 . + . gene\_id "XLOC\_046448"; transcript\_id "TCONS\_00076589"; exon\_number "10";  
oId "CUFF.84371.5"; tss\_id "TSS58260";  
chr6 Cufflinks exon 114290865 114291442 . + . gene\_id "XLOC\_046448"; transcript\_id "TCONS\_00076588"; exon\_number "1";  
oId "CUFF.84371.4"; tss\_id "TSS58260";  
chr6 Cufflinks exon 114313057 114313182 . + . gene\_id "XLOC\_046448"; transcript\_id "TCONS\_00076588"; exon\_number "2";  
oId "CUFF.84371.4"; tss\_id "TSS58260";  
chr6 Cufflinks exon 114314507 114314651 . + . gene\_id "XLOC\_046448"; transcript\_id "TCONS\_00076588"; exon\_number "3";  
oId "CUFF.84371.4"; tss\_id "TSS58260";  
chr6 Cufflinks exon 114316764 114317224 . + . gene\_id "XLOC\_046448"; transcript\_id "TCONS\_00076588"; exon\_number "4";  
oId "CUFF.84371.4"; tss\_id "TSS58260";  
chr6 Cufflinks exon 114410101 114410183 . + . gene\_id "XLOC\_046448"; transcript\_id "TCONS\_00076588"; exon\_number "5";  
oId "CUFF.84371.4"; tss\_id "TSS58260";  
chr6 Cufflinks exon 114437282 114437344 . + . gene\_id "XLOC\_046448"; transcript\_id "TCONS\_00076588"; exon\_number "6";  
oId "CUFF.84371.4"; tss\_id "TSS58260";  
chr6 Cufflinks exon 114499817 114499884 . + . gene\_id "XLOC\_046448"; transcript\_id "TCONS\_00076588"; exon\_number "7";  
oId "CUFF.84371.4"; tss\_id "TSS58260";  
chr6 Cufflinks exon 114500189 114500321 . + . gene\_id "XLOC\_046448"; transcript\_id "TCONS\_00076588"; exon\_number "8";  
oId "CUFF.84371.4"; tss\_id "TSS58260";  
chr6 Cufflinks exon 114556794 114556935 . + . gene\_id "XLOC\_046448"; transcript\_id "TCONS\_00076588"; exon\_number "9";  
oId "CUFF.84371.4"; tss\_id "TSS58260";  
chr6 Cufflinks exon 114661686 114661893 . + . gene\_id "XLOC\_046448"; transcript\_id "TCONS\_00076588"; exon\_number "10";  
oId "CUFF.84371.4"; tss\_id "TSS58260";  
chr6 Cufflinks exon 114290865 114291442 . + . gene\_id "XLOC\_046448"; transcript\_id "TCONS\_00076587"; exon\_number "1";  
oId "CUFF.84371.3"; tss\_id "TSS58260";  
chr6 Cufflinks exon 114313057 114313178 . + . gene\_id "XLOC\_046448"; transcript\_id "TCONS\_00076587"; exon\_number "2";  
oId "CUFF.84371.3"; tss\_id "TSS58260";  
chr6 Cufflinks exon 114314507 114314651 . + . gene\_id "XLOC\_046448"; transcript\_id "TCONS\_00076587"; exon\_number "3";  
oId "CUFF.84371.3"; tss\_id "TSS58260";  
chr6 Cufflinks exon 114316764 114317224 . + . gene\_id "XLOC\_046448"; transcript\_id "TCONS\_00076587"; exon\_number "4";  
oId "CUFF.84371.3"; tss\_id "TSS58260";  
chr6 Cufflinks exon 114410101 114410183 . + . gene\_id "XLOC\_046448"; transcript\_id "TCONS\_00076587"; exon\_number "5";  
oId "CUFF.84371.3"; tss\_id "TSS58260";  
chr6 Cufflinks exon 114437282 114437344 . + . gene\_id "XLOC\_046448"; transcript\_id "TCONS\_00076587"; exon\_number "6";  
oId "CUFF.84371.3"; tss\_id "TSS58260";  
chr6 Cufflinks exon 114499817 114499884 . + . gene\_id "XLOC\_046448"; transcript\_id "TCONS\_00076587"; exon\_number "7";  
oId "CUFF.84371.3"; tss\_id "TSS58260";  
chr6 Cufflinks exon 114500189 114500321 . + . gene\_id "XLOC\_046448"; transcript\_id "TCONS\_00076587"; exon\_number "8";

oId "CUFF.84371.3"; tss\_id "TSS58260";  
chr6 Cufflinks exon114556794 114556935 . + . gene\_id "XLOC\_046448"; transcript\_id "TCONS\_00076587"; exon\_number "9";  
oId "CUFF.84371.3"; tss\_id "TSS58260";  
chr6 Cufflinks exon114661686 114661893 . + . gene\_id "XLOC\_046448"; transcript\_id "TCONS\_00076587"; exon\_number "10";  
oId "CUFF.84371.3"; tss\_id "TSS58260";  
chr6 Cufflinks exon114292665 114292779 . + . gene\_id "XLOC\_046448"; transcript\_id "TCONS\_00076590"; exon\_number "1";  
oId "CUFF.84371.7"; tss\_id "TSS58261";  
chr6 Cufflinks exon114293063 114294741 . + . gene\_id "XLOC\_046448"; transcript\_id "TCONS\_00076590"; exon\_number "2";  
oId "CUFF.84371.7"; tss\_id "TSS58261";  
chr6 Cufflinks exon114292665 114292939 . + . gene\_id "XLOC\_046448"; transcript\_id "TCONS\_00076591"; exon\_number "1";  
oId "CUFF.84371.8"; tss\_id "TSS58261";  
chr6 Cufflinks exon114313057 114313351 . + . gene\_id "XLOC\_046448"; transcript\_id "TCONS\_00076591"; exon\_number "2";  
oId "CUFF.84371.8"; tss\_id "TSS58261";  
chr6 Cufflinks exon114314507 114314651 . + . gene\_id "XLOC\_046448"; transcript\_id "TCONS\_00076591"; exon\_number "3";  
oId "CUFF.84371.8"; tss\_id "TSS58261";  
chr6 Cufflinks exon114316764 114317224 . + . gene\_id "XLOC\_046448"; transcript\_id "TCONS\_00076591"; exon\_number "4";  
oId "CUFF.84371.8"; tss\_id "TSS58261";  
chr6 Cufflinks exon114410101 114410183 . + . gene\_id "XLOC\_046448"; transcript\_id "TCONS\_00076591"; exon\_number "5";  
oId "CUFF.84371.8"; tss\_id "TSS58261";  
chr6 Cufflinks exon114437282 114437344 . + . gene\_id "XLOC\_046448"; transcript\_id "TCONS\_00076591"; exon\_number "6";  
oId "CUFF.84371.8"; tss\_id "TSS58261";  
chr6 Cufflinks exon114499817 114499884 . + . gene\_id "XLOC\_046448"; transcript\_id "TCONS\_00076591"; exon\_number "7";  
oId "CUFF.84371.8"; tss\_id "TSS58261";  
chr6 Cufflinks exon114500189 114500321 . + . gene\_id "XLOC\_046448"; transcript\_id "TCONS\_00076591"; exon\_number "8";  
oId "CUFF.84371.8"; tss\_id "TSS58261";  
chr6 Cufflinks exon114556794 114556935 . + . gene\_id "XLOC\_046448"; transcript\_id "TCONS\_00076591"; exon\_number "9";  
oId "CUFF.84371.8"; tss\_id "TSS58261";  
chr6 Cufflinks exon114661686 114661893 . + . gene\_id "XLOC\_046448"; transcript\_id "TCONS\_00076591"; exon\_number "10";  
oId "CUFF.84371.8"; tss\_id "TSS58261";  
chr6 Cufflinks exon120326801 120326962 . + . gene\_id "XLOC\_046491"; transcript\_id "TCONS\_00076654"; exon\_number "1";  
oId "CUFF.84564.2"; tss\_id "TSS58312";  
chr6 Cufflinks exon120449713 120449992 . + . gene\_id "XLOC\_046491"; transcript\_id "TCONS\_00076654"; exon\_number "2";  
oId "CUFF.84564.2"; tss\_id "TSS58312";  
chr6 Cufflinks exon126399627 126399986 . + . gene\_id "XLOC\_046543"; transcript\_id "TCONS\_00076749"; exon\_number "1";  
oId "CUFF.84750.7"; tss\_id "TSS58373";  
chr6 Cufflinks exon126403116 126403430 . + . gene\_id "XLOC\_046543"; transcript\_id "TCONS\_00076749"; exon\_number "2";  
oId "CUFF.84750.7"; tss\_id "TSS58373";  
chr6 Cufflinks exon126436904 126437001 . + . gene\_id "XLOC\_046556"; transcript\_id "TCONS\_00076751"; exon\_number "1";  
oId "CUFF.84766.1"; tss\_id "TSS58386";  
chr6 Cufflinks exon126451803 126452004 . + . gene\_id "XLOC\_046556"; transcript\_id "TCONS\_00076751"; exon\_number "2";  
oId "CUFF.84766.1"; tss\_id "TSS58386";  
chr6 Cufflinks exon126457363 126457536 . + . gene\_id "XLOC\_046556"; transcript\_id "TCONS\_00076751"; exon\_number "3";  
oId "CUFF.84766.1"; tss\_id "TSS58386";



|                                        |           |   |   |   |                                                                         |
|----------------------------------------|-----------|---|---|---|-------------------------------------------------------------------------|
| chr6 Cufflinks exon126436904           | 126437001 | . | + | . | gene_id "XLOC_046556"; transcript_id "TCONS_00076752"; exon_number "1"; |
| oId "CUFF.84766.2"; tss_id "TSS58386"; |           |   |   |   |                                                                         |
| chr6 Cufflinks exon126495971           | 126496057 | . | + | . | gene_id "XLOC_046556"; transcript_id "TCONS_00076752"; exon_number "2"; |
| oId "CUFF.84766.2"; tss_id "TSS58386"; |           |   |   |   |                                                                         |
| chr6 Cufflinks exon126569019           | 126569330 | . | + | . | gene_id "XLOC_046556"; transcript_id "TCONS_00076752"; exon_number "3"; |
| oId "CUFF.84766.2"; tss_id "TSS58386"; |           |   |   |   |                                                                         |
| chr6 Cufflinks exon126494452           | 126494706 | . | + | . | gene_id "XLOC_046556"; transcript_id "TCONS_00076754"; exon_number "1"; |
| oId "CUFF.84766.3"; tss_id "TSS58387"; |           |   |   |   |                                                                         |
| chr6 Cufflinks exon126495971           | 126496057 | . | + | . | gene_id "XLOC_046556"; transcript_id "TCONS_00076754"; exon_number "2"; |
| oId "CUFF.84766.3"; tss_id "TSS58387"; |           |   |   |   |                                                                         |
| chr6 Cufflinks exon126498340           | 126498481 | . | + | . | gene_id "XLOC_046556"; transcript_id "TCONS_00076754"; exon_number "3"; |
| oId "CUFF.84766.3"; tss_id "TSS58387"; |           |   |   |   |                                                                         |
| chr6 Cufflinks exon126588201           | 126588307 | . | + | . | gene_id "XLOC_046556"; transcript_id "TCONS_00076754"; exon_number "4"; |
| oId "CUFF.84766.3"; tss_id "TSS58387"; |           |   |   |   |                                                                         |
| chr6 Cufflinks exon126591411           | 126591646 | . | + | . | gene_id "XLOC_046556"; transcript_id "TCONS_00076754"; exon_number "5"; |
| oId "CUFF.84766.3"; tss_id "TSS58387"; |           |   |   |   |                                                                         |
| chr6 Cufflinks exon135376106           | 135376624 | . | + | . | gene_id "XLOC_046622"; transcript_id "TCONS_00076854"; exon_number "1"; |
| oId "CUFF.84978.2"; tss_id "TSS58464"; |           |   |   |   |                                                                         |
| chr6 Cufflinks exon135377378           | 135377482 | . | + | . | gene_id "XLOC_046622"; transcript_id "TCONS_00076854"; exon_number "2"; |
| oId "CUFF.84978.2"; tss_id "TSS58464"; |           |   |   |   |                                                                         |
| chr6 Cufflinks exon135381353           | 135382409 | . | + | . | gene_id "XLOC_046622"; transcript_id "TCONS_00076854"; exon_number "3"; |
| oId "CUFF.84978.2"; tss_id "TSS58464"; |           |   |   |   |                                                                         |
| chr6 Cufflinks exon135376106           | 135376624 | . | + | . | gene_id "XLOC_046622"; transcript_id "TCONS_00076853"; exon_number "1"; |
| oId "CUFF.84978.1"; tss_id "TSS58464"; |           |   |   |   |                                                                         |
| chr6 Cufflinks exon135381353           | 135382409 | . | + | . | gene_id "XLOC_046622"; transcript_id "TCONS_00076853"; exon_number "2"; |
| oId "CUFF.84978.1"; tss_id "TSS58464"; |           |   |   |   |                                                                         |
| chr6 Cufflinks exon135376111           | 135376624 | . | + | . | gene_id "XLOC_046622"; transcript_id "TCONS_00076855"; exon_number "1"; |
| oId "CUFF.84978.4"; tss_id "TSS58464"; |           |   |   |   |                                                                         |
| chr6 Cufflinks exon135381361           | 135382409 | . | + | . | gene_id "XLOC_046622"; transcript_id "TCONS_00076855"; exon_number "2"; |
| oId "CUFF.84978.4"; tss_id "TSS58464"; |           |   |   |   |                                                                         |
| chr6 Cufflinks exon142993126           | 142993275 | . | + | . | gene_id "XLOC_046685"; transcript_id "TCONS_00076930"; exon_number "1"; |
| oId "CUFF.85200.1"; tss_id "TSS58532"; |           |   |   |   |                                                                         |
| chr6 Cufflinks exon142993704           | 142993904 | . | + | . | gene_id "XLOC_046685"; transcript_id "TCONS_00076930"; exon_number "2"; |
| oId "CUFF.85200.1"; tss_id "TSS58532"; |           |   |   |   |                                                                         |
| chr6 Cufflinks exon143267725           | 143270829 | . | + | . | gene_id "XLOC_046689"; transcript_id "TCONS_00076937"; exon_number "1"; |
| oId "CUFF.85204.2"; tss_id "TSS58538"; |           |   |   |   |                                                                         |
| chr6 Cufflinks exon143271280           | 143276832 | . | + | . | gene_id "XLOC_046689"; transcript_id "TCONS_00076937"; exon_number "2"; |
| oId "CUFF.85204.2"; tss_id "TSS58538"; |           |   |   |   |                                                                         |
| chr6 Cufflinks exon143267725           | 143270829 | . | + | . | gene_id "XLOC_046689"; transcript_id "TCONS_00076936"; exon_number "1"; |
| oId "CUFF.85204.1"; tss_id "TSS58538"; |           |   |   |   |                                                                         |
| chr6 Cufflinks exon143271285           | 143276832 | . | + | . | gene_id "XLOC_046689"; transcript_id "TCONS_00076936"; exon_number "2"; |
| oId "CUFF.85204.1"; tss_id "TSS58538"; |           |   |   |   |                                                                         |
| chr6 Cufflinks exon143267725           | 143271528 | . | + | . | gene_id "XLOC_046689"; transcript_id "TCONS_00076938"; exon_number "1"; |

oId "CUFF.85204.3"; tss\_id "TSS58538";  
chr6 Cufflinks exon143277556 143280598 . + . gene\_id "XLOC\_046689"; transcript\_id "TCONS\_00076938"; exon\_number "2";  
oId "CUFF.85204.3"; tss\_id "TSS58538";  
chr6 Cufflinks exon150310746 150312182 . + . gene\_id "XLOC\_046767"; transcript\_id "TCONS\_00077055"; exon\_number "1";  
oId "CUFF.85493.4"; tss\_id "TSS58634";  
chr6 Cufflinks exon150314520 150314548 . + . gene\_id "XLOC\_046767"; transcript\_id "TCONS\_00077055"; exon\_number "2";  
oId "CUFF.85493.4"; tss\_id "TSS58634";  
chr6 Cufflinks exon150317250 150326332 . + . gene\_id "XLOC\_046767"; transcript\_id "TCONS\_00077055"; exon\_number "3";  
oId "CUFF.85493.4"; tss\_id "TSS58634";  
chr6 Cufflinks exon150310746 150312182 . + . gene\_id "XLOC\_046767"; transcript\_id "TCONS\_00077054"; exon\_number "1";  
oId "CUFF.85493.3"; tss\_id "TSS58634";  
chr6 Cufflinks exon150317250 150326332 . + . gene\_id "XLOC\_046767"; transcript\_id "TCONS\_00077054"; exon\_number "2";  
oId "CUFF.85493.3"; tss\_id "TSS58634";  
chr6 Cufflinks exon150310746 150312182 . + . gene\_id "XLOC\_046767"; transcript\_id "TCONS\_00077053"; exon\_number "1";  
oId "CUFF.85493.2"; tss\_id "TSS58634";  
chr6 Cufflinks exon150317250 150317693 . + . gene\_id "XLOC\_046767"; transcript\_id "TCONS\_00077053"; exon\_number "2";  
oId "CUFF.85493.2"; tss\_id "TSS58634";  
chr6 Cufflinks exon150325169 150326332 . + . gene\_id "XLOC\_046767"; transcript\_id "TCONS\_00077053"; exon\_number "3";  
oId "CUFF.85493.2"; tss\_id "TSS58634";  
chr6 Cufflinks exon150310884 150312182 . + . gene\_id "XLOC\_046767"; transcript\_id "TCONS\_00077056"; exon\_number "1";  
oId "CUFF.85493.5"; tss\_id "TSS58635";  
chr6 Cufflinks exon150317250 150321314 . + . gene\_id "XLOC\_046767"; transcript\_id "TCONS\_00077056"; exon\_number "2";  
oId "CUFF.85493.5"; tss\_id "TSS58635";  
chr6 Cufflinks exon150342130 150342214 . + . gene\_id "XLOC\_046767"; transcript\_id "TCONS\_00077056"; exon\_number "3";  
oId "CUFF.85493.5"; tss\_id "TSS58635";  
chr6 Cufflinks exon150310885 150312182 . + . gene\_id "XLOC\_046767"; transcript\_id "TCONS\_00077057"; exon\_number "1";  
oId "CUFF.85493.6"; tss\_id "TSS58635";  
chr6 Cufflinks exon150314520 150314548 . + . gene\_id "XLOC\_046767"; transcript\_id "TCONS\_00077057"; exon\_number "2";  
oId "CUFF.85493.6"; tss\_id "TSS58635";  
chr6 Cufflinks exon150316853 150317092 . + . gene\_id "XLOC\_046767"; transcript\_id "TCONS\_00077057"; exon\_number "3";  
oId "CUFF.85493.6"; tss\_id "TSS58635";  
chr6 Cufflinks exon150317250 150317500 . + . gene\_id "XLOC\_046767"; transcript\_id "TCONS\_00077057"; exon\_number "4";  
oId "CUFF.85493.6"; tss\_id "TSS58635";  
chr6 Cufflinks exon150325169 150326332 . + . gene\_id "XLOC\_046767"; transcript\_id "TCONS\_00077057"; exon\_number "5";  
oId "CUFF.85493.6"; tss\_id "TSS58635";  
chr6 Cufflinks exon150311104 150312188 . + . gene\_id "XLOC\_046767"; transcript\_id "TCONS\_00077058"; exon\_number "1";  
oId "CUFF.85493.9"; tss\_id "TSS58636";  
chr6 Cufflinks exon150317256 150326332 . + . gene\_id "XLOC\_046767"; transcript\_id "TCONS\_00077058"; exon\_number "2";  
oId "CUFF.85493.9"; tss\_id "TSS58636";  
chr6 Cufflinks exon150315502 150317092 . + . gene\_id "XLOC\_046767"; transcript\_id "TCONS\_00077059"; exon\_number "1";  
oId "CUFF.85493.10"; tss\_id "TSS58637";  
chr6 Cufflinks exon150317250 150321314 . + . gene\_id "XLOC\_046767"; transcript\_id "TCONS\_00077059"; exon\_number "2";  
oId "CUFF.85493.10"; tss\_id "TSS58637";

|                                         |           |   |   |   |                                                                         |
|-----------------------------------------|-----------|---|---|---|-------------------------------------------------------------------------|
| chr6 Cufflinks exon150342130            | 150342214 | . | + | . | gene_id "XLOC_046767"; transcript_id "TCONS_00077059"; exon_number "3"; |
| oId "CUFF.85493.10"; tss_id "TSS58637"; |           |   |   |   |                                                                         |
| chr6 Cufflinks exon150315518            | 150317693 | . | + | . | gene_id "XLOC_046767"; transcript_id "TCONS_00077060"; exon_number "1"; |
| oId "CUFF.85493.11"; tss_id "TSS58637"; |           |   |   |   |                                                                         |
| chr6 Cufflinks exon150381135            | 150381201 | . | + | . | gene_id "XLOC_046767"; transcript_id "TCONS_00077060"; exon_number "2"; |
| oId "CUFF.85493.11"; tss_id "TSS58637"; |           |   |   |   |                                                                         |
| chr6 Cufflinks exon150389593            | 150389642 | . | + | . | gene_id "XLOC_046767"; transcript_id "TCONS_00077060"; exon_number "3"; |
| oId "CUFF.85493.11"; tss_id "TSS58637"; |           |   |   |   |                                                                         |
| chr6 Cufflinks exon150315622            | 150317092 | . | + | . | gene_id "XLOC_046767"; transcript_id "TCONS_00077061"; exon_number "1"; |
| oId "CUFF.85493.12"; tss_id "TSS58638"; |           |   |   |   |                                                                         |
| chr6 Cufflinks exon150317250            | 150326332 | . | + | . | gene_id "XLOC_046767"; transcript_id "TCONS_00077061"; exon_number "2"; |
| oId "CUFF.85493.12"; tss_id "TSS58638"; |           |   |   |   |                                                                         |
| chr6 Cufflinks exon151712333            | 151721599 | . | + | . | gene_id "XLOC_046775"; transcript_id "TCONS_00077077"; exon_number "1"; |
| oId "CUFF.85519.3"; tss_id "TSS58651";  |           |   |   |   |                                                                         |
| chr6 Cufflinks exon151722070            | 151736386 | . | + | . | gene_id "XLOC_046775"; transcript_id "TCONS_00077077"; exon_number "2"; |
| oId "CUFF.85519.3"; tss_id "TSS58651";  |           |   |   |   |                                                                         |
| chr6 Cufflinks exon167559919            | 167560143 | . | + | . | gene_id "XLOC_046897"; transcript_id "TCONS_00077290"; exon_number "1"; |
| oId "CUFF.85988.1"; tss_id "TSS58799";  |           |   |   |   |                                                                         |
| chr6 Cufflinks exon167562878            | 167562972 | . | + | . | gene_id "XLOC_046897"; transcript_id "TCONS_00077290"; exon_number "2"; |
| oId "CUFF.85988.1"; tss_id "TSS58799";  |           |   |   |   |                                                                         |
| chr6 Cufflinks exon167577889            | 167578048 | . | + | . | gene_id "XLOC_046897"; transcript_id "TCONS_00077290"; exon_number "3"; |
| oId "CUFF.85988.1"; tss_id "TSS58799";  |           |   |   |   |                                                                         |
| chr6 Cufflinks exon167578697            | 167579121 | . | + | . | gene_id "XLOC_046897"; transcript_id "TCONS_00077290"; exon_number "4"; |
| oId "CUFF.85988.1"; tss_id "TSS58799";  |           |   |   |   |                                                                         |
| chr6 Cufflinks exon167581845            | 167583820 | . | + | . | gene_id "XLOC_046897"; transcript_id "TCONS_00077290"; exon_number "5"; |
| oId "CUFF.85988.1"; tss_id "TSS58799";  |           |   |   |   |                                                                         |
| chr6 Cufflinks exon167563452            | 167563561 | . | + | . | gene_id "XLOC_046897"; transcript_id "TCONS_00077291"; exon_number "1"; |
| oId "CUFF.85988.2"; tss_id "TSS58800";  |           |   |   |   |                                                                         |
| chr6 Cufflinks exon167577889            | 167578048 | . | + | . | gene_id "XLOC_046897"; transcript_id "TCONS_00077291"; exon_number "2"; |
| oId "CUFF.85988.2"; tss_id "TSS58800";  |           |   |   |   |                                                                         |
| chr6 Cufflinks exon167578697            | 167578841 | . | + | . | gene_id "XLOC_046897"; transcript_id "TCONS_00077291"; exon_number "3"; |
| oId "CUFF.85988.2"; tss_id "TSS58800";  |           |   |   |   |                                                                         |
| chr6 Cufflinks exon167581845            | 167583820 | . | + | . | gene_id "XLOC_046897"; transcript_id "TCONS_00077291"; exon_number "4"; |
| oId "CUFF.85988.2"; tss_id "TSS58800";  |           |   |   |   |                                                                         |
| chr6 Cufflinks exon170462294            | 170462627 | . | + | . | gene_id "XLOC_046924"; transcript_id "TCONS_00077343"; exon_number "1"; |
| oId "CUFF.86074.2"; tss_id "TSS58835";  |           |   |   |   |                                                                         |
| chr6 Cufflinks exon170464091            | 170464196 | . | + | . | gene_id "XLOC_046924"; transcript_id "TCONS_00077343"; exon_number "2"; |
| oId "CUFF.86074.2"; tss_id "TSS58835";  |           |   |   |   |                                                                         |
| chr6 Cufflinks exon170464322            | 170464414 | . | + | . | gene_id "XLOC_046924"; transcript_id "TCONS_00077343"; exon_number "3"; |
| oId "CUFF.86074.2"; tss_id "TSS58835";  |           |   |   |   |                                                                         |
| chr6 Cufflinks exon170465678            | 170465797 | . | + | . | gene_id "XLOC_046924"; transcript_id "TCONS_00077343"; exon_number "4"; |
| oId "CUFF.86074.2"; tss_id "TSS58835";  |           |   |   |   |                                                                         |
| chr6 Cufflinks exon170465927            | 170466189 | . | + | . | gene_id "XLOC_046924"; transcript_id "TCONS_00077343"; exon_number "5"; |

oId "CUFF.86074.2"; tss\_id "TSS58835";  
chr6 Cufflinks exon170462294 170462627 . + . gene\_id "XLOC\_046924"; transcript\_id "TCONS\_00077342"; exon\_number "1";  
oId "CUFF.86074.1"; tss\_id "TSS58835";  
chr6 Cufflinks exon170464322 170464414 . + . gene\_id "XLOC\_046924"; transcript\_id "TCONS\_00077342"; exon\_number "2";  
oId "CUFF.86074.1"; tss\_id "TSS58835";  
chr6 Cufflinks exon170465927 170466189 . + . gene\_id "XLOC\_046924"; transcript\_id "TCONS\_00077342"; exon\_number "3";  
oId "CUFF.86074.1"; tss\_id "TSS58835";  
chr6 Cufflinks exon170581143 170588533 . + . gene\_id "XLOC\_046925"; transcript\_id "TCONS\_00077346"; exon\_number "1";  
oId "CUFF.86084.3"; tss\_id "TSS58836";  
chr6 Cufflinks exon170588668 170590253 . + . gene\_id "XLOC\_046925"; transcript\_id "TCONS\_00077346"; exon\_number "2";  
oId "CUFF.86084.3"; tss\_id "TSS58836";  
chr6 Cufflinks exon170581143 170584518 . + . gene\_id "XLOC\_046925"; transcript\_id "TCONS\_00077345"; exon\_number "1";  
oId "CUFF.86084.2"; tss\_id "TSS58836";  
chr6 Cufflinks exon170588297 170590253 . + . gene\_id "XLOC\_046925"; transcript\_id "TCONS\_00077345"; exon\_number "2";  
oId "CUFF.86084.2"; tss\_id "TSS58836";  
chr6 Cufflinks exon170581143 170583365 . + . gene\_id "XLOC\_046925"; transcript\_id "TCONS\_00077344"; exon\_number "1";  
oId "CUFF.86084.1"; tss\_id "TSS58836";  
chr6 Cufflinks exon170588668 170590253 . + . gene\_id "XLOC\_046925"; transcript\_id "TCONS\_00077344"; exon\_number "2";  
oId "CUFF.86084.1"; tss\_id "TSS58836";  
chr6 Cufflinks exon170581144 170583278 . + . gene\_id "XLOC\_046925"; transcript\_id "TCONS\_00077347"; exon\_number "1";  
oId "CUFF.86084.4"; tss\_id "TSS58836";  
chr6 Cufflinks exon170588297 170590253 . + . gene\_id "XLOC\_046925"; transcript\_id "TCONS\_00077347"; exon\_number "2";  
oId "CUFF.86084.4"; tss\_id "TSS58836";  
chr6 Cufflinks exon170581160 170584710 . + . gene\_id "XLOC\_046925"; transcript\_id "TCONS\_00077348"; exon\_number "1";  
oId "CUFF.86084.5"; tss\_id "TSS58836";  
chr6 Cufflinks exon170588297 170590253 . + . gene\_id "XLOC\_046925"; transcript\_id "TCONS\_00077348"; exon\_number "2";  
oId "CUFF.86084.5"; tss\_id "TSS58836";  
chr6 Cufflinks exon170581253 170583278 . + . gene\_id "XLOC\_046925"; transcript\_id "TCONS\_00077350"; exon\_number "1";  
oId "CUFF.86084.7"; tss\_id "TSS58837";  
chr6 Cufflinks exon170588668 170590253 . + . gene\_id "XLOC\_046925"; transcript\_id "TCONS\_00077350"; exon\_number "2";  
oId "CUFF.86084.7"; tss\_id "TSS58837";  
chr6 Cufflinks exon170581253 170582162 . + . gene\_id "XLOC\_046925"; transcript\_id "TCONS\_00077349"; exon\_number "1";  
oId "CUFF.86084.6"; tss\_id "TSS58837";  
chr6 Cufflinks exon170588297 170590253 . + . gene\_id "XLOC\_046925"; transcript\_id "TCONS\_00077349"; exon\_number "2";  
oId "CUFF.86084.6"; tss\_id "TSS58837";  
chr6 Cufflinks exon285402 287823 . - . gene\_id "XLOC\_046932"; transcript\_id "TCONS\_00077365"; exon\_number "1"; oId  
"CUFF.80622.1"; tss\_id "TSS58845";  
chr6 Cufflinks exon288401 288710 . - . gene\_id "XLOC\_046932"; transcript\_id "TCONS\_00077365"; exon\_number "2"; oId  
"CUFF.80622.1"; tss\_id "TSS58845";  
chr6 Cufflinks exon3593826 3594769 . - . gene\_id "XLOC\_046970"; transcript\_id "TCONS\_00077425"; exon\_number "1"; oId  
"CUFF.80825.3"; tss\_id "TSS58894";  
chr6 Cufflinks exon3595801 3595895 . - . gene\_id "XLOC\_046970"; transcript\_id "TCONS\_00077425"; exon\_number "2"; oId  
"CUFF.80825.3"; tss\_id "TSS58894";

chr6 Cufflinks exon3623882 3624177 . - . gene\_id "XLOC\_046970"; transcript\_id "TCONS\_00077425"; exon\_number "3"; oId  
"CUFF.80825.3"; tss\_id "TSS58894";  
chr6 Cufflinks exon3593826 3594769 . - . gene\_id "XLOC\_046970"; transcript\_id "TCONS\_00077426"; exon\_number "1"; oId  
"CUFF.80825.1"; tss\_id "TSS58895";  
chr6 Cufflinks exon3623882 3624177 . - . gene\_id "XLOC\_046970"; transcript\_id "TCONS\_00077426"; exon\_number "2"; oId  
"CUFF.80825.1"; tss\_id "TSS58895";  
chr6 Cufflinks exon3624778 3625054 . - . gene\_id "XLOC\_046970"; transcript\_id "TCONS\_00077426"; exon\_number "3"; oId  
"CUFF.80825.1"; tss\_id "TSS58895";  
chr6 Cufflinks exon3593826 3594769 . - . gene\_id "XLOC\_046970"; transcript\_id "TCONS\_00077427"; exon\_number "1"; oId  
"CUFF.80825.2"; tss\_id "TSS58896";  
chr6 Cufflinks exon3719597 3720499 . - . gene\_id "XLOC\_046970"; transcript\_id "TCONS\_00077427"; exon\_number "2"; oId  
"CUFF.80825.2"; tss\_id "TSS58896";  
chr6 Cufflinks exon3688517 3688875 . - . gene\_id "XLOC\_046970"; transcript\_id "TCONS\_00077428"; exon\_number "1"; oId  
"CUFF.80825.6"; tss\_id "TSS58897";  
chr6 Cufflinks exon3719597 3720277 . - . gene\_id "XLOC\_046970"; transcript\_id "TCONS\_00077428"; exon\_number "2"; oId  
"CUFF.80825.6"; tss\_id "TSS58897";  
chr6 Cufflinks exon3688517 3688876 . - . gene\_id "XLOC\_046970"; transcript\_id "TCONS\_00077429"; exon\_number "1"; oId  
"CUFF.80825.5"; tss\_id "TSS58897";  
chr6 Cufflinks exon3719597 3720300 . - . gene\_id "XLOC\_046970"; transcript\_id "TCONS\_00077429"; exon\_number "2"; oId  
"CUFF.80825.5"; tss\_id "TSS58897";  
chr6 Cufflinks exon3983118 3987897 . - . gene\_id "XLOC\_046973"; transcript\_id "TCONS\_00077433"; exon\_number "1"; oId  
"CUFF.80832.2"; tss\_id "TSS58901";  
chr6 Cufflinks exon4011740 4019475 . - . gene\_id "XLOC\_046973"; transcript\_id "TCONS\_00077433"; exon\_number "2"; oId  
"CUFF.80832.2"; tss\_id "TSS58901";  
chr6 Cufflinks exon6687437 6697395 . - . gene\_id "XLOC\_046996"; transcript\_id "TCONS\_00077471"; exon\_number "1"; oId  
"CUFF.80925.8"; tss\_id "TSS58929";  
chr6 Cufflinks exon6702561 6702838 . - . gene\_id "XLOC\_046996"; transcript\_id "TCONS\_00077471"; exon\_number "2"; oId  
"CUFF.80925.8"; tss\_id "TSS58929";  
chr6 Cufflinks exon6687437 6701180 . - . gene\_id "XLOC\_046996"; transcript\_id "TCONS\_00077470"; exon\_number "1"; oId  
"CUFF.80925.11"; tss\_id "TSS58929";  
chr6 Cufflinks exon6702561 6702838 . - . gene\_id "XLOC\_046996"; transcript\_id "TCONS\_00077470"; exon\_number "2"; oId  
"CUFF.80925.11"; tss\_id "TSS58929";  
chr6 Cufflinks exon6687437 6697395 . - . gene\_id "XLOC\_046996"; transcript\_id "TCONS\_00077472"; exon\_number "1"; oId  
"CUFF.80925.4"; tss\_id "TSS58929";  
chr6 Cufflinks exon6700420 6701180 . - . gene\_id "XLOC\_046996"; transcript\_id "TCONS\_00077472"; exon\_number "2"; oId  
"CUFF.80925.4"; tss\_id "TSS58929";  
chr6 Cufflinks exon6702561 6702871 . - . gene\_id "XLOC\_046996"; transcript\_id "TCONS\_00077472"; exon\_number "3"; oId  
"CUFF.80925.4"; tss\_id "TSS58929";  
chr6 Cufflinks exon6687437 6692479 . - . gene\_id "XLOC\_046996"; transcript\_id "TCONS\_00077473"; exon\_number "1"; oId  
"CUFF.80925.1"; tss\_id "TSS58929";  
chr6 Cufflinks exon6693148 6701531 . - . gene\_id "XLOC\_046996"; transcript\_id "TCONS\_00077473"; exon\_number "2"; oId  
"CUFF.80925.1"; tss\_id "TSS58929";  
chr6 Cufflinks exon6702561 6702873 . - . gene\_id "XLOC\_046996"; transcript\_id "TCONS\_00077473"; exon\_number "3"; oId

"CUFF.80925.1"; tss\_id "TSS58929";  
chr6 Cufflinks exon6687437 6697395 . - . gene\_id "XLOC\_046996"; transcript\_id "TCONS\_00077474"; exon\_number "1"; oId  
"CUFF.80925.9"; tss\_id "TSS58929";  
chr6 Cufflinks exon6700449 6700588 . - . gene\_id "XLOC\_046996"; transcript\_id "TCONS\_00077474"; exon\_number "2"; oId  
"CUFF.80925.9"; tss\_id "TSS58929";  
chr6 Cufflinks exon6702561 6702900 . - . gene\_id "XLOC\_046996"; transcript\_id "TCONS\_00077474"; exon\_number "3"; oId  
"CUFF.80925.9"; tss\_id "TSS58929";  
chr6 Cufflinks exon6687437 6697396 . - . gene\_id "XLOC\_046996"; transcript\_id "TCONS\_00077476"; exon\_number "1"; oId  
"CUFF.80925.7"; tss\_id "TSS58929";  
chr6 Cufflinks exon6700450 6701180 . - . gene\_id "XLOC\_046996"; transcript\_id "TCONS\_00077476"; exon\_number "2"; oId  
"CUFF.80925.7"; tss\_id "TSS58929";  
chr6 Cufflinks exon6702561 6702916 . - . gene\_id "XLOC\_046996"; transcript\_id "TCONS\_00077476"; exon\_number "3"; oId  
"CUFF.80925.7"; tss\_id "TSS58929";  
chr6 Cufflinks exon6687437 6697395 . - . gene\_id "XLOC\_046996"; transcript\_id "TCONS\_00077475"; exon\_number "1"; oId  
"CUFF.80925.6"; tss\_id "TSS58929";  
chr6 Cufflinks exon6700449 6702916 . - . gene\_id "XLOC\_046996"; transcript\_id "TCONS\_00077475"; exon\_number "2"; oId  
"CUFF.80925.6"; tss\_id "TSS58929";  
chr6 Cufflinks exon6687437 6697395 . - . gene\_id "XLOC\_046996"; transcript\_id "TCONS\_00077478"; exon\_number "1"; oId  
"CUFF.80925.5"; tss\_id "TSS58930";  
chr6 Cufflinks exon6700431 6701531 . - . gene\_id "XLOC\_046996"; transcript\_id "TCONS\_00077478"; exon\_number "2"; oId  
"CUFF.80925.5"; tss\_id "TSS58930";  
chr6 Cufflinks exon6702561 6703522 . - . gene\_id "XLOC\_046996"; transcript\_id "TCONS\_00077478"; exon\_number "3"; oId  
"CUFF.80925.5"; tss\_id "TSS58930";  
chr6 Cufflinks exon6704907 6705311 . - . gene\_id "XLOC\_046997"; transcript\_id "TCONS\_00077480"; exon\_number "1"; oId  
"CUFF.80926.2"; tss\_id "TSS58931";  
chr6 Cufflinks exon6711105 6711292 . - . gene\_id "XLOC\_046997"; transcript\_id "TCONS\_00077480"; exon\_number "2"; oId  
"CUFF.80926.2"; tss\_id "TSS58931";  
chr6 Cufflinks exon6711930 6712293 . - . gene\_id "XLOC\_046997"; transcript\_id "TCONS\_00077480"; exon\_number "3"; oId  
"CUFF.80926.2"; tss\_id "TSS58931";  
chr6 Cufflinks exon6704907 6705311 . - . gene\_id "XLOC\_046997"; transcript\_id "TCONS\_00077479"; exon\_number "1"; oId  
"CUFF.80926.1"; tss\_id "TSS58931";  
chr6 Cufflinks exon6711105 6711214 . - . gene\_id "XLOC\_046997"; transcript\_id "TCONS\_00077479"; exon\_number "2"; oId  
"CUFF.80926.1"; tss\_id "TSS58931";  
chr6 Cufflinks exon6711930 6712293 . - . gene\_id "XLOC\_046997"; transcript\_id "TCONS\_00077479"; exon\_number "3"; oId  
"CUFF.80926.1"; tss\_id "TSS58931";  
chr6 Cufflinks exon6704907 6705311 . - . gene\_id "XLOC\_046997"; transcript\_id "TCONS\_00077481"; exon\_number "1"; oId  
"CUFF.80926.3"; tss\_id "TSS58931";  
chr6 Cufflinks exon6711105 6711216 . - . gene\_id "XLOC\_046997"; transcript\_id "TCONS\_00077481"; exon\_number "2"; oId  
"CUFF.80926.3"; tss\_id "TSS58931";  
chr6 Cufflinks exon6711930 6712091 . - . gene\_id "XLOC\_046997"; transcript\_id "TCONS\_00077481"; exon\_number "3"; oId  
"CUFF.80926.3"; tss\_id "TSS58931";  
chr6 Cufflinks exon6712300 6712332 . - . gene\_id "XLOC\_046997"; transcript\_id "TCONS\_00077481"; exon\_number "4"; oId  
"CUFF.80926.3"; tss\_id "TSS58931";

chr6 Cufflinks exon8734767 8738131 . - . gene\_id "XLOC\_047037"; transcript\_id "TCONS\_00077536"; exon\_number "1"; oId "CUFF.81012.1"; tss\_id "TSS58973";

chr6 Cufflinks exon8743187 8743767 . - . gene\_id "XLOC\_047037"; transcript\_id "TCONS\_00077536"; exon\_number "2"; oId "CUFF.81012.1"; tss\_id "TSS58973";

chr6 Cufflinks exon10743573 10744547 . - . gene\_id "XLOC\_047044"; transcript\_id "TCONS\_00077549"; exon\_number "1"; oId "CUFF.81039.1"; tss\_id "TSS58984";

chr6 Cufflinks exon10747694 10747844 . - . gene\_id "XLOC\_047044"; transcript\_id "TCONS\_00077549"; exon\_number "2"; oId "CUFF.81039.1"; tss\_id "TSS58984";

chr6 Cufflinks exon13571634 13573454 . - . gene\_id "XLOC\_047065"; transcript\_id "TCONS\_00077586"; exon\_number "1"; oId "CUFF.81143.5"; tss\_id "TSS59013";

chr6 Cufflinks exon13574197 13574208 . - . gene\_id "XLOC\_047065"; transcript\_id "TCONS\_00077586"; exon\_number "2"; oId "CUFF.81143.5"; tss\_id "TSS59013";

chr6 Cufflinks exon13571634 13573455 . - . gene\_id "XLOC\_047065"; transcript\_id "TCONS\_00077589"; exon\_number "1"; oId "CUFF.81143.4"; tss\_id "TSS59014";

chr6 Cufflinks exon13574197 13574370 . - . gene\_id "XLOC\_047065"; transcript\_id "TCONS\_00077589"; exon\_number "2"; oId "CUFF.81143.4"; tss\_id "TSS59014";

chr6 Cufflinks exon13571634 13573453 . - . gene\_id "XLOC\_047065"; transcript\_id "TCONS\_00077588"; exon\_number "1"; oId "CUFF.81143.3"; tss\_id "TSS59014";

chr6 Cufflinks exon13574197 13574370 . - . gene\_id "XLOC\_047065"; transcript\_id "TCONS\_00077588"; exon\_number "2"; oId "CUFF.81143.3"; tss\_id "TSS59014";

chr6 Cufflinks exon13571634 13573438 . - . gene\_id "XLOC\_047065"; transcript\_id "TCONS\_00077587"; exon\_number "1"; oId "CUFF.81143.2"; tss\_id "TSS59014";

chr6 Cufflinks exon13574197 13574370 . - . gene\_id "XLOC\_047065"; transcript\_id "TCONS\_00077587"; exon\_number "2"; oId "CUFF.81143.2"; tss\_id "TSS59014";

chr6 Cufflinks exon14426313 14426698 . - . gene\_id "XLOC\_047084"; transcript\_id "TCONS\_00077615"; exon\_number "1"; oId "CUFF.81230.1"; tss\_id "TSS59035";

chr6 Cufflinks exon14426889 14427086 . - . gene\_id "XLOC\_047084"; transcript\_id "TCONS\_00077615"; exon\_number "2"; oId "CUFF.81230.1"; tss\_id "TSS59035";

chr6 Cufflinks exon14444890 14445144 . - . gene\_id "XLOC\_047086"; transcript\_id "TCONS\_00077617"; exon\_number "1"; oId "CUFF.81231.2"; tss\_id "TSS59037";

chr6 Cufflinks exon14448747 14448859 . - . gene\_id "XLOC\_047086"; transcript\_id "TCONS\_00077617"; exon\_number "2"; oId "CUFF.81231.2"; tss\_id "TSS59037";

chr6 Cufflinks exon14451728 14451786 . - . gene\_id "XLOC\_047086"; transcript\_id "TCONS\_00077617"; exon\_number "3"; oId "CUFF.81231.2"; tss\_id "TSS59037";

chr6 Cufflinks exon14452485 14452820 . - . gene\_id "XLOC\_047086"; transcript\_id "TCONS\_00077617"; exon\_number "4"; oId "CUFF.81231.2"; tss\_id "TSS59037";

chr6 Cufflinks exon14450095 14450119 . - . gene\_id "XLOC\_047086"; transcript\_id "TCONS\_00077618"; exon\_number "1"; oId "CUFF.81231.6"; tss\_id "TSS59037";

chr6 Cufflinks exon14451729 14451892 . - . gene\_id "XLOC\_047086"; transcript\_id "TCONS\_00077618"; exon\_number "2"; oId "CUFF.81231.6"; tss\_id "TSS59037";

chr6 Cufflinks exon14452485 14452766 . - . gene\_id "XLOC\_047086"; transcript\_id "TCONS\_00077618"; exon\_number "3"; oId "CUFF.81231.6"; tss\_id "TSS59037";

chr6 Cufflinks exon26548460 26548466 . - . gene\_id "XLOC\_047182"; transcript\_id "TCONS\_00077780"; exon\_number "1";

|                                                                                |   |   |   |                                                                         |
|--------------------------------------------------------------------------------|---|---|---|-------------------------------------------------------------------------|
| oId "CUFF.81562.1"; tss_id "TSS59154";<br>chr6 Cufflinks exon26550624 26551058 | . | - | . | gene_id "XLOC_047182"; transcript_id "TCONS_00077780"; exon_number "2"; |
| oId "CUFF.81562.1"; tss_id "TSS59154";<br>chr6 Cufflinks exon27670926 27671138 | . | - | . | gene_id "XLOC_047210"; transcript_id "TCONS_00077823"; exon_number "1"; |
| oId "CUFF.81684.2"; tss_id "TSS59185";<br>chr6 Cufflinks exon27678453 27678675 | . | - | . | gene_id "XLOC_047210"; transcript_id "TCONS_00077823"; exon_number "2"; |
| oId "CUFF.81684.2"; tss_id "TSS59185";<br>chr6 Cufflinks exon27685983 27686078 | . | - | . | gene_id "XLOC_047210"; transcript_id "TCONS_00077823"; exon_number "3"; |
| oId "CUFF.81684.2"; tss_id "TSS59185";<br>chr6 Cufflinks exon27688613 27688779 | . | - | . | gene_id "XLOC_047210"; transcript_id "TCONS_00077823"; exon_number "4"; |
| oId "CUFF.81684.2"; tss_id "TSS59185";<br>chr6 Cufflinks exon27670926 27671138 | . | - | . | gene_id "XLOC_047210"; transcript_id "TCONS_00077822"; exon_number "1"; |
| oId "CUFF.81684.1"; tss_id "TSS59185";<br>chr6 Cufflinks exon27678453 27678675 | . | - | . | gene_id "XLOC_047210"; transcript_id "TCONS_00077822"; exon_number "2"; |
| oId "CUFF.81684.1"; tss_id "TSS59185";<br>chr6 Cufflinks exon27688613 27688779 | . | - | . | gene_id "XLOC_047210"; transcript_id "TCONS_00077822"; exon_number "3"; |
| oId "CUFF.81684.1"; tss_id "TSS59185";<br>chr6 Cufflinks exon27670926 27671138 | . | - | . | gene_id "XLOC_047210"; transcript_id "TCONS_00077824"; exon_number "1"; |
| oId "CUFF.81684.3"; tss_id "TSS59186";<br>chr6 Cufflinks exon27678453 27678562 | . | - | . | gene_id "XLOC_047210"; transcript_id "TCONS_00077824"; exon_number "2"; |
| oId "CUFF.81684.3"; tss_id "TSS59186";<br>chr6 Cufflinks exon27710804 27710919 | . | - | . | gene_id "XLOC_047210"; transcript_id "TCONS_00077824"; exon_number "3"; |
| oId "CUFF.81684.3"; tss_id "TSS59186";<br>chr6 Cufflinks exon27711091 27711273 | . | - | . | gene_id "XLOC_047210"; transcript_id "TCONS_00077824"; exon_number "4"; |
| oId "CUFF.81684.3"; tss_id "TSS59186";<br>chr6 Cufflinks exon27721838 27721960 | . | - | . | gene_id "XLOC_047210"; transcript_id "TCONS_00077824"; exon_number "5"; |
| oId "CUFF.81684.3"; tss_id "TSS59186";<br>chr6 Cufflinks exon28046066 28046750 | . | - | . | gene_id "XLOC_047220"; transcript_id "TCONS_00077835"; exon_number "1"; |
| oId "CUFF.81731.1"; tss_id "TSS59196";<br>chr6 Cufflinks exon28048404 28048872 | . | - | . | gene_id "XLOC_047220"; transcript_id "TCONS_00077835"; exon_number "2"; |
| oId "CUFF.81731.1"; tss_id "TSS59196";<br>chr6 Cufflinks exon28444445 28445667 | . | - | . | gene_id "XLOC_047239"; transcript_id "TCONS_00077873"; exon_number "1"; |
| oId "CUFF.81804.1"; tss_id "TSS59221";<br>chr6 Cufflinks exon28457141 28457761 | . | - | . | gene_id "XLOC_047239"; transcript_id "TCONS_00077873"; exon_number "2"; |
| oId "CUFF.81804.1"; tss_id "TSS59221";<br>chr6 Cufflinks exon28453211 28453488 | . | - | . | gene_id "XLOC_047239"; transcript_id "TCONS_00077874"; exon_number "1"; |
| oId "CUFF.81804.2"; tss_id "TSS59222";<br>chr6 Cufflinks exon28457141 28457428 | . | - | . | gene_id "XLOC_047239"; transcript_id "TCONS_00077874"; exon_number "2"; |
| oId "CUFF.81804.2"; tss_id "TSS59222";<br>chr6 Cufflinks exon30201816 30202045 | . | - | . | gene_id "XLOC_047299"; transcript_id "TCONS_00077944"; exon_number "1"; |
| oId "CUFF.81988.1"; tss_id "TSS59285";<br>chr6 Cufflinks exon30202135 30202227 | . | - | . | gene_id "XLOC_047299"; transcript_id "TCONS_00077944"; exon_number "2"; |
| oId "CUFF.81988.1"; tss_id "TSS59285";                                         |   |   |   |                                                                         |



|                                        |          |   |   |   |                                                                         |
|----------------------------------------|----------|---|---|---|-------------------------------------------------------------------------|
| chr6 Cufflinks exon30209924            | 30210088 | . | - | . | gene_id "XLOC_047299"; transcript_id "TCONS_00077944"; exon_number "3"; |
| oId "CUFF.81988.1"; tss_id "TSS59285"; |          |   |   |   |                                                                         |
| chr6 Cufflinks exon30222124            | 30222241 | . | - | . | gene_id "XLOC_047299"; transcript_id "TCONS_00077944"; exon_number "4"; |
| oId "CUFF.81988.1"; tss_id "TSS59285"; |          |   |   |   |                                                                         |
| chr6 Cufflinks exon30293786            | 30293911 | . | - | . | gene_id "XLOC_047299"; transcript_id "TCONS_00077944"; exon_number "5"; |
| oId "CUFF.81988.1"; tss_id "TSS59285"; |          |   |   |   |                                                                         |
| chr6 Cufflinks exon31109363            | 31109381 | . | - | . | gene_id "XLOC_047325"; transcript_id "TCONS_00077981"; exon_number "1"; |
| oId "CUFF.82086.1"; tss_id "TSS59317"; |          |   |   |   |                                                                         |
| chr6 Cufflinks exon31164703            | 31165794 | . | - | . | gene_id "XLOC_047325"; transcript_id "TCONS_00077981"; exon_number "2"; |
| oId "CUFF.82086.1"; tss_id "TSS59317"; |          |   |   |   |                                                                         |
| chr6 Cufflinks exon31362122            | 31362994 | . | - | . | gene_id "XLOC_047333"; transcript_id "TCONS_00077993"; exon_number "1"; |
| oId "CUFF.82110.1"; tss_id "TSS59327"; |          |   |   |   |                                                                         |
| chr6 Cufflinks exon31367831            | 31368560 | . | - | . | gene_id "XLOC_047333"; transcript_id "TCONS_00077993"; exon_number "2"; |
| oId "CUFF.82110.1"; tss_id "TSS59327"; |          |   |   |   |                                                                         |
| chr6 Cufflinks exon33213434            | 33214333 | . | - | . | gene_id "XLOC_047402"; transcript_id "TCONS_00078124"; exon_number "1"; |
| oId "CUFF.82297.1"; tss_id "TSS59423"; |          |   |   |   |                                                                         |
| chr6 Cufflinks exon33214516            | 33215204 | . | - | . | gene_id "XLOC_047402"; transcript_id "TCONS_00078124"; exon_number "2"; |
| oId "CUFF.82297.1"; tss_id "TSS59423"; |          |   |   |   |                                                                         |
| chr6 Cufflinks exon33213434            | 33214327 | . | - | . | gene_id "XLOC_047402"; transcript_id "TCONS_00078125"; exon_number "1"; |
| oId "CUFF.82297.2"; tss_id "TSS59424"; |          |   |   |   |                                                                         |
| chr6 Cufflinks exon33214516            | 33214627 | . | - | . | gene_id "XLOC_047402"; transcript_id "TCONS_00078125"; exon_number "2"; |
| oId "CUFF.82297.2"; tss_id "TSS59424"; |          |   |   |   |                                                                         |
| chr6 Cufflinks exon33214718            | 33215628 | . | - | . | gene_id "XLOC_047402"; transcript_id "TCONS_00078125"; exon_number "3"; |
| oId "CUFF.82297.2"; tss_id "TSS59424"; |          |   |   |   |                                                                         |
| chr6 Cufflinks exon33215700            | 33216319 | . | - | . | gene_id "XLOC_047403"; transcript_id "TCONS_00078126"; exon_number "1"; |
| oId "CUFF.82298.1"; tss_id "TSS59425"; |          |   |   |   |                                                                         |
| chr6 Cufflinks exon33216420            | 33216541 | . | - | . | gene_id "XLOC_047403"; transcript_id "TCONS_00078126"; exon_number "2"; |
| oId "CUFF.82298.1"; tss_id "TSS59425"; |          |   |   |   |                                                                         |
| chr6 Cufflinks exon33216745            | 33217233 | . | - | . | gene_id "XLOC_047403"; transcript_id "TCONS_00078126"; exon_number "3"; |
| oId "CUFF.82298.1"; tss_id "TSS59425"; |          |   |   |   |                                                                         |
| chr6 Cufflinks exon33869307            | 33871829 | . | - | . | gene_id "XLOC_047426"; transcript_id "TCONS_00078162"; exon_number "1"; |
| oId "CUFF.82368.3"; tss_id "TSS59450"; |          |   |   |   |                                                                         |
| chr6 Cufflinks exon33872110            | 33872249 | . | - | . | gene_id "XLOC_047426"; transcript_id "TCONS_00078162"; exon_number "2"; |
| oId "CUFF.82368.3"; tss_id "TSS59450"; |          |   |   |   |                                                                         |
| chr6 Cufflinks exon33869307            | 33871829 | . | - | . | gene_id "XLOC_047426"; transcript_id "TCONS_00078161"; exon_number "1"; |
| oId "CUFF.82368.2"; tss_id "TSS59450"; |          |   |   |   |                                                                         |
| chr6 Cufflinks exon33872105            | 33872249 | . | - | . | gene_id "XLOC_047426"; transcript_id "TCONS_00078161"; exon_number "2"; |
| oId "CUFF.82368.2"; tss_id "TSS59450"; |          |   |   |   |                                                                         |
| chr6 Cufflinks exon33869307            | 33871829 | . | - | . | gene_id "XLOC_047426"; transcript_id "TCONS_00078163"; exon_number "1"; |
| oId "CUFF.82368.1"; tss_id "TSS59451"; |          |   |   |   |                                                                         |
| chr6 Cufflinks exon33872776            | 33873011 | . | - | . | gene_id "XLOC_047426"; transcript_id "TCONS_00078163"; exon_number "2"; |
| oId "CUFF.82368.1"; tss_id "TSS59451"; |          |   |   |   |                                                                         |
| chr6 Cufflinks exon34248027            | 34251058 | . | - | . | gene_id "XLOC_047432"; transcript_id "TCONS_00078176"; exon_number "1"; |

oId "CUFF.82383.2"; tss\_id "TSS59459";  
chr6 Cufflinks exon34356598 34356614 . - . gene\_id "XLOC\_047432"; transcript\_id "TCONS\_00078176"; exon\_number "2";  
oId "CUFF.82383.2"; tss\_id "TSS59459";  
chr6 Cufflinks exon34248027 34253147 . - . gene\_id "XLOC\_047432"; transcript\_id "TCONS\_00078177"; exon\_number "1";  
oId "CUFF.82383.1"; tss\_id "TSS59460";  
chr6 Cufflinks exon34396712 34396735 . - . gene\_id "XLOC\_047432"; transcript\_id "TCONS\_00078177"; exon\_number "2";  
oId "CUFF.82383.1"; tss\_id "TSS59460";  
chr6 Cufflinks exon36114572 36114707 . - . gene\_id "XLOC\_047461"; transcript\_id "TCONS\_00078234"; exon\_number "1";  
oId "CUFF.82495.1"; tss\_id "TSS59500";  
chr6 Cufflinks exon36147394 36147484 . - . gene\_id "XLOC\_047461"; transcript\_id "TCONS\_00078234"; exon\_number "2";  
oId "CUFF.82495.1"; tss\_id "TSS59500";  
chr6 Cufflinks exon36163814 36164271 . - . gene\_id "XLOC\_047461"; transcript\_id "TCONS\_00078234"; exon\_number "3";  
oId "CUFF.82495.1"; tss\_id "TSS59500";  
chr6 Cufflinks exon41420058 41421058 . - . gene\_id "XLOC\_047534"; transcript\_id "TCONS\_00078358"; exon\_number "1";  
oId "CUFF.82774.1"; tss\_id "TSS59596";  
chr6 Cufflinks exon41454803 41454868 . - . gene\_id "XLOC\_047534"; transcript\_id "TCONS\_00078358"; exon\_number "2";  
oId "CUFF.82774.1"; tss\_id "TSS59596";  
chr6 Cufflinks exon41513827 41514024 . - . gene\_id "XLOC\_047534"; transcript\_id "TCONS\_00078358"; exon\_number "3";  
oId "CUFF.82774.1"; tss\_id "TSS59596";  
chr6 Cufflinks exon41491633 41491963 . - . gene\_id "XLOC\_047534"; transcript\_id "TCONS\_00078364"; exon\_number "1";  
oId "CUFF.82774.2"; tss\_id "TSS59596";  
chr6 Cufflinks exon41513827 41513981 . - . gene\_id "XLOC\_047534"; transcript\_id "TCONS\_00078364"; exon\_number "2";  
oId "CUFF.82774.2"; tss\_id "TSS59596";  
chr6 Cufflinks exon44045051 44047121 . - . gene\_id "XLOC\_047601"; transcript\_id "TCONS\_00078465"; exon\_number "1";  
oId "CUFF.82981.1"; tss\_id "TSS59685";  
chr6 Cufflinks exon44047275 44047417 . - . gene\_id "XLOC\_047601"; transcript\_id "TCONS\_00078465"; exon\_number "2";  
oId "CUFF.82981.1"; tss\_id "TSS59685";  
chr6 Cufflinks exon44050269 44050610 . - . gene\_id "XLOC\_047601"; transcript\_id "TCONS\_00078465"; exon\_number "3";  
oId "CUFF.82981.1"; tss\_id "TSS59685";  
chr6 Cufflinks exon44067578 44068735 . - . gene\_id "XLOC\_047604"; transcript\_id "TCONS\_00078468"; exon\_number "1";  
oId "CUFF.82989.1"; tss\_id "TSS59688";  
chr6 Cufflinks exon44068835 44072350 . - . gene\_id "XLOC\_047604"; transcript\_id "TCONS\_00078468"; exon\_number "2";  
oId "CUFF.82989.1"; tss\_id "TSS59688";  
chr6 Cufflinks exon45956289 45956298 . - . gene\_id "XLOC\_047621"; transcript\_id "TCONS\_00078502"; exon\_number "1";  
oId "CUFF.83045.1"; tss\_id "TSS59713";  
chr6 Cufflinks exon46090689 46090846 . - . gene\_id "XLOC\_047621"; transcript\_id "TCONS\_00078502"; exon\_number "2";  
oId "CUFF.83045.1"; tss\_id "TSS59713";  
chr6 Cufflinks exon46097327 46097571 . - . gene\_id "XLOC\_047621"; transcript\_id "TCONS\_00078502"; exon\_number "3";  
oId "CUFF.83045.1"; tss\_id "TSS59713";  
chr6 Cufflinks exon46067933 46067960 . - . gene\_id "XLOC\_047621"; transcript\_id "TCONS\_00078505"; exon\_number "1";  
oId "CUFF.83045.6"; tss\_id "TSS59713";  
chr6 Cufflinks exon46070277 46070396 . - . gene\_id "XLOC\_047621"; transcript\_id "TCONS\_00078505"; exon\_number "2";  
oId "CUFF.83045.6"; tss\_id "TSS59713";

|                                        |           |   |   |   |                                                                         |
|----------------------------------------|-----------|---|---|---|-------------------------------------------------------------------------|
| chr6 Cufflinks exon46090689            | 46090846  | . | - | . | gene_id "XLOC_047621"; transcript_id "TCONS_00078505"; exon_number "3"; |
| oId "CUFF.83045.6"; tss_id "TSS59713"; |           |   |   |   |                                                                         |
| chr6 Cufflinks exon46097327            | 46097691  | . | - | . | gene_id "XLOC_047621"; transcript_id "TCONS_00078505"; exon_number "4"; |
| oId "CUFF.83045.6"; tss_id "TSS59713"; |           |   |   |   |                                                                         |
| chr6 Cufflinks exon46068441            | 46068887  | . | - | . | gene_id "XLOC_047621"; transcript_id "TCONS_00078506"; exon_number "1"; |
| oId "CUFF.83045.9"; tss_id "TSS59713"; |           |   |   |   |                                                                         |
| chr6 Cufflinks exon46070278            | 46070396  | . | - | . | gene_id "XLOC_047621"; transcript_id "TCONS_00078506"; exon_number "2"; |
| oId "CUFF.83045.9"; tss_id "TSS59713"; |           |   |   |   |                                                                         |
| chr6 Cufflinks exon46090689            | 46090846  | . | - | . | gene_id "XLOC_047621"; transcript_id "TCONS_00078506"; exon_number "3"; |
| oId "CUFF.83045.9"; tss_id "TSS59713"; |           |   |   |   |                                                                         |
| chr6 Cufflinks exon46097241            | 46097571  | . | - | . | gene_id "XLOC_047621"; transcript_id "TCONS_00078506"; exon_number "4"; |
| oId "CUFF.83045.9"; tss_id "TSS59713"; |           |   |   |   |                                                                         |
| chr6 Cufflinks exon52124195            | 52124562  | . | - | . | gene_id "XLOC_047651"; transcript_id "TCONS_00078549"; exon_number "1"; |
| oId "CUFF.83115.2"; tss_id "TSS59746"; |           |   |   |   |                                                                         |
| chr6 Cufflinks exon52125472            | 52128573  | . | - | . | gene_id "XLOC_047651"; transcript_id "TCONS_00078549"; exon_number "2"; |
| oId "CUFF.83115.2"; tss_id "TSS59746"; |           |   |   |   |                                                                         |
| chr6 Cufflinks exon79554177            | 79556801  | . | - | . | gene_id "XLOC_047771"; transcript_id "TCONS_00078729"; exon_number "1"; |
| oId "CUFF.83478.2"; tss_id "TSS59899"; |           |   |   |   |                                                                         |
| chr6 Cufflinks exon79560404            | 79561195  | . | - | . | gene_id "XLOC_047771"; transcript_id "TCONS_00078729"; exon_number "2"; |
| oId "CUFF.83478.2"; tss_id "TSS59899"; |           |   |   |   |                                                                         |
| chr6 Cufflinks exon79557612            | 79560480  | . | - | . | gene_id "XLOC_047771"; transcript_id "TCONS_00078730"; exon_number "1"; |
| oId "CUFF.83478.3"; tss_id "TSS59900"; |           |   |   |   |                                                                         |
| chr6 Cufflinks exon79577105            | 79577144  | . | - | . | gene_id "XLOC_047771"; transcript_id "TCONS_00078730"; exon_number "2"; |
| oId "CUFF.83478.3"; tss_id "TSS59900"; |           |   |   |   |                                                                         |
| chr6 Cufflinks exon87861057            | 87863022  | . | - | . | gene_id "XLOC_047821"; transcript_id "TCONS_00078820"; exon_number "1"; |
| oId "CUFF.83711.2"; tss_id "TSS59966"; |           |   |   |   |                                                                         |
| chr6 Cufflinks exon87864694            | 87865044  | . | - | . | gene_id "XLOC_047821"; transcript_id "TCONS_00078820"; exon_number "2"; |
| oId "CUFF.83711.2"; tss_id "TSS59966"; |           |   |   |   |                                                                         |
| chr6 Cufflinks exon87861057            | 87863020  | . | - | . | gene_id "XLOC_047821"; transcript_id "TCONS_00078819"; exon_number "1"; |
| oId "CUFF.83711.1"; tss_id "TSS59966"; |           |   |   |   |                                                                         |
| chr6 Cufflinks exon87864803            | 87865044  | . | - | . | gene_id "XLOC_047821"; transcript_id "TCONS_00078819"; exon_number "2"; |
| oId "CUFF.83711.1"; tss_id "TSS59966"; |           |   |   |   |                                                                         |
| chr6 Cufflinks exon96007972            | 96008021  | . | - | . | gene_id "XLOC_047865"; transcript_id "TCONS_00078896"; exon_number "1"; |
| oId "CUFF.83850.1"; tss_id "TSS60024"; |           |   |   |   |                                                                         |
| chr6 Cufflinks exon96015104            | 96015189  | . | - | . | gene_id "XLOC_047865"; transcript_id "TCONS_00078896"; exon_number "2"; |
| oId "CUFF.83850.1"; tss_id "TSS60024"; |           |   |   |   |                                                                         |
| chr6 Cufflinks exon96024969            | 96025327  | . | - | . | gene_id "XLOC_047865"; transcript_id "TCONS_00078896"; exon_number "3"; |
| oId "CUFF.83850.1"; tss_id "TSS60024"; |           |   |   |   |                                                                         |
| chr6 Cufflinks exon96018324            | 96020409  | . | - | . | gene_id "XLOC_047869"; transcript_id "TCONS_00078900"; exon_number "1"; |
| oId "CUFF.83855.1"; tss_id "TSS60028"; |           |   |   |   |                                                                         |
| chr6 Cufflinks exon96020450            | 96022446  | . | - | . | gene_id "XLOC_047869"; transcript_id "TCONS_00078900"; exon_number "2"; |
| oId "CUFF.83855.1"; tss_id "TSS60028"; |           |   |   |   |                                                                         |
| chr6 Cufflinks exon104949472           | 104950023 | . | - | . | gene_id "XLOC_047911"; transcript_id "TCONS_00078974"; exon_number "1"; |

oId "CUFF.83975.1"; tss\_id "TSS60084";  
chr6 Cufflinks exon104951380 104951476 . - . gene\_id "XLOC\_047911"; transcript\_id "TCONS\_00078974"; exon\_number "2";  
oId "CUFF.83975.1"; tss\_id "TSS60084";  
chr6 Cufflinks exon105130543 105130771 . - . gene\_id "XLOC\_047911"; transcript\_id "TCONS\_00078974"; exon\_number "3";  
oId "CUFF.83975.1"; tss\_id "TSS60084";  
chr6 Cufflinks exon105131003 105131169 . - . gene\_id "XLOC\_047911"; transcript\_id "TCONS\_00078974"; exon\_number "4";  
oId "CUFF.83975.1"; tss\_id "TSS60084";  
chr6 Cufflinks exon105136020 105136159 . - . gene\_id "XLOC\_047911"; transcript\_id "TCONS\_00078974"; exon\_number "5";  
oId "CUFF.83975.1"; tss\_id "TSS60084";  
chr6 Cufflinks exon104951452 104951476 . - . gene\_id "XLOC\_047911"; transcript\_id "TCONS\_00078975"; exon\_number "1";  
oId "CUFF.83975.2"; tss\_id "TSS60084";  
chr6 Cufflinks exon105131003 105131169 . - . gene\_id "XLOC\_047911"; transcript\_id "TCONS\_00078975"; exon\_number "2";  
oId "CUFF.83975.2"; tss\_id "TSS60084";  
chr6 Cufflinks exon105136020 105136159 . - . gene\_id "XLOC\_047911"; transcript\_id "TCONS\_00078975"; exon\_number "3";  
oId "CUFF.83975.2"; tss\_id "TSS60084";  
chr6 Cufflinks exon104959029 104960234 . - . gene\_id "XLOC\_047911"; transcript\_id "TCONS\_00078976"; exon\_number "1";  
oId "CUFF.83975.4"; tss\_id "TSS60084";  
chr6 Cufflinks exon105131003 105131169 . - . gene\_id "XLOC\_047911"; transcript\_id "TCONS\_00078976"; exon\_number "2";  
oId "CUFF.83975.4"; tss\_id "TSS60084";  
chr6 Cufflinks exon105136020 105136159 . - . gene\_id "XLOC\_047911"; transcript\_id "TCONS\_00078976"; exon\_number "3";  
oId "CUFF.83975.4"; tss\_id "TSS60084";  
chr6 Cufflinks exon104959029 104960234 . - . gene\_id "XLOC\_047911"; transcript\_id "TCONS\_00078977"; exon\_number "1";  
oId "CUFF.83975.3"; tss\_id "TSS60085";  
chr6 Cufflinks exon105130543 105130771 . - . gene\_id "XLOC\_047911"; transcript\_id "TCONS\_00078977"; exon\_number "2";  
oId "CUFF.83975.3"; tss\_id "TSS60085";  
chr6 Cufflinks exon105131003 105131169 . - . gene\_id "XLOC\_047911"; transcript\_id "TCONS\_00078977"; exon\_number "3";  
oId "CUFF.83975.3"; tss\_id "TSS60085";  
chr6 Cufflinks exon105136020 105136162 . - . gene\_id "XLOC\_047911"; transcript\_id "TCONS\_00078977"; exon\_number "4";  
oId "CUFF.83975.3"; tss\_id "TSS60085";  
chr6 Cufflinks exon105153494 105153571 . - . gene\_id "XLOC\_047911"; transcript\_id "TCONS\_00078977"; exon\_number "5";  
oId "CUFF.83975.3"; tss\_id "TSS60085";  
chr6 Cufflinks exon107194863 107195163 . - . gene\_id "XLOC\_047928"; transcript\_id "TCONS\_00079010"; exon\_number "1";  
oId "CUFF.84020.1"; tss\_id "TSS60108";  
chr6 Cufflinks exon107197509 107197663 . - . gene\_id "XLOC\_047928"; transcript\_id "TCONS\_00079010"; exon\_number "2";  
oId "CUFF.84020.1"; tss\_id "TSS60108";  
chr6 Cufflinks exon107212893 107212991 . - . gene\_id "XLOC\_047928"; transcript\_id "TCONS\_00079010"; exon\_number "3";  
oId "CUFF.84020.1"; tss\_id "TSS60108";  
chr6 Cufflinks exon110338904 110339017 . - . gene\_id "XLOC\_047960"; transcript\_id "TCONS\_00079080"; exon\_number "1";  
oId "CUFF.84160.1"; tss\_id "TSS60159";  
chr6 Cufflinks exon110344831 110344894 . - . gene\_id "XLOC\_047960"; transcript\_id "TCONS\_00079080"; exon\_number "2";  
oId "CUFF.84160.1"; tss\_id "TSS60159";  
chr6 Cufflinks exon110357348 110357950 . - . gene\_id "XLOC\_047960"; transcript\_id "TCONS\_00079080"; exon\_number "3";  
oId "CUFF.84160.1"; tss\_id "TSS60159";

|                                        |           |   |   |   |                                                                         |
|----------------------------------------|-----------|---|---|---|-------------------------------------------------------------------------|
| chr6 Cufflinks exon110338904           | 110339017 | . | - | . | gene_id "XLOC_047960"; transcript_id "TCONS_00079081"; exon_number "1"; |
| oId "CUFF.84160.2"; tss_id "TSS60160"; |           |   |   |   |                                                                         |
| chr6 Cufflinks exon110344831           | 110344894 | . | - | . | gene_id "XLOC_047960"; transcript_id "TCONS_00079081"; exon_number "2"; |
| oId "CUFF.84160.2"; tss_id "TSS60160"; |           |   |   |   |                                                                         |
| chr6 Cufflinks exon110357348           | 110357475 | . | - | . | gene_id "XLOC_047960"; transcript_id "TCONS_00079081"; exon_number "3"; |
| oId "CUFF.84160.2"; tss_id "TSS60160"; |           |   |   |   |                                                                         |
| chr6 Cufflinks exon110358018           | 110358528 | . | - | . | gene_id "XLOC_047960"; transcript_id "TCONS_00079081"; exon_number "4"; |
| oId "CUFF.84160.2"; tss_id "TSS60160"; |           |   |   |   |                                                                         |
| chr6 Cufflinks exon110360725           | 110360766 | . | - | . | gene_id "XLOC_047960"; transcript_id "TCONS_00079081"; exon_number "5"; |
| oId "CUFF.84160.2"; tss_id "TSS60160"; |           |   |   |   |                                                                         |
| chr6 Cufflinks exon110344795           | 110344892 | . | - | . | gene_id "XLOC_047960"; transcript_id "TCONS_00079082"; exon_number "1"; |
| oId "CUFF.84160.3"; tss_id "TSS60161"; |           |   |   |   |                                                                         |
| chr6 Cufflinks exon110358018           | 110358148 | . | - | . | gene_id "XLOC_047960"; transcript_id "TCONS_00079082"; exon_number "2"; |
| oId "CUFF.84160.3"; tss_id "TSS60161"; |           |   |   |   |                                                                         |
| chr6 Cufflinks exon110359650           | 110359742 | . | - | . | gene_id "XLOC_047960"; transcript_id "TCONS_00079082"; exon_number "3"; |
| oId "CUFF.84160.3"; tss_id "TSS60161"; |           |   |   |   |                                                                         |
| chr6 Cufflinks exon110360725           | 110361425 | . | - | . | gene_id "XLOC_047960"; transcript_id "TCONS_00079082"; exon_number "4"; |
| oId "CUFF.84160.3"; tss_id "TSS60161"; |           |   |   |   |                                                                         |
| chr6 Cufflinks exon110354459           | 110358528 | . | - | . | gene_id "XLOC_047960"; transcript_id "TCONS_00079083"; exon_number "1"; |
| oId "CUFF.84160.7"; tss_id "TSS60162"; |           |   |   |   |                                                                         |
| chr6 Cufflinks exon110360047           | 110360091 | . | - | . | gene_id "XLOC_047960"; transcript_id "TCONS_00079083"; exon_number "2"; |
| oId "CUFF.84160.7"; tss_id "TSS60162"; |           |   |   |   |                                                                         |
| chr6 Cufflinks exon110354459           | 110357039 | . | - | . | gene_id "XLOC_047960"; transcript_id "TCONS_00079084"; exon_number "1"; |
| oId "CUFF.84160.9"; tss_id "TSS60161"; |           |   |   |   |                                                                         |
| chr6 Cufflinks exon110358018           | 110358529 | . | - | . | gene_id "XLOC_047960"; transcript_id "TCONS_00079084"; exon_number "2"; |
| oId "CUFF.84160.9"; tss_id "TSS60161"; |           |   |   |   |                                                                         |
| chr6 Cufflinks exon110360725           | 110361367 | . | - | . | gene_id "XLOC_047960"; transcript_id "TCONS_00079084"; exon_number "3"; |
| oId "CUFF.84160.9"; tss_id "TSS60161"; |           |   |   |   |                                                                         |
| chr6 Cufflinks exon110354459           | 110358530 | . | - | . | gene_id "XLOC_047960"; transcript_id "TCONS_00079085"; exon_number "1"; |
| oId "CUFF.84160.8"; tss_id "TSS60161"; |           |   |   |   |                                                                         |
| chr6 Cufflinks exon110359652           | 110359742 | . | - | . | gene_id "XLOC_047960"; transcript_id "TCONS_00079085"; exon_number "2"; |
| oId "CUFF.84160.8"; tss_id "TSS60161"; |           |   |   |   |                                                                         |
| chr6 Cufflinks exon110360725           | 110361385 | . | - | . | gene_id "XLOC_047960"; transcript_id "TCONS_00079085"; exon_number "3"; |
| oId "CUFF.84160.8"; tss_id "TSS60161"; |           |   |   |   |                                                                         |
| chr6 Cufflinks exon110354459           | 110357039 | . | - | . | gene_id "XLOC_047960"; transcript_id "TCONS_00079086"; exon_number "1"; |
| oId "CUFF.84160.4"; tss_id "TSS60161"; |           |   |   |   |                                                                         |
| chr6 Cufflinks exon110358018           | 110358528 | . | - | . | gene_id "XLOC_047960"; transcript_id "TCONS_00079086"; exon_number "2"; |
| oId "CUFF.84160.4"; tss_id "TSS60161"; |           |   |   |   |                                                                         |
| chr6 Cufflinks exon110360725           | 110361391 | . | - | . | gene_id "XLOC_047960"; transcript_id "TCONS_00079086"; exon_number "3"; |
| oId "CUFF.84160.4"; tss_id "TSS60161"; |           |   |   |   |                                                                         |
| chr6 Cufflinks exon110354459           | 110358528 | . | - | . | gene_id "XLOC_047960"; transcript_id "TCONS_00079088"; exon_number "1"; |
| oId "CUFF.84160.6"; tss_id "TSS60161"; |           |   |   |   |                                                                         |
| chr6 Cufflinks exon110359650           | 110359742 | . | - | . | gene_id "XLOC_047960"; transcript_id "TCONS_00079088"; exon_number "2"; |

oId "CUFF.84160.6"; tss\_id "TSS60161";  
chr6 Cufflinks exon110360725 110361425 . - . gene\_id "XLOC\_047960"; transcript\_id "TCONS\_00079088"; exon\_number "3";  
oId "CUFF.84160.6"; tss\_id "TSS60161";  
chr6 Cufflinks exon110354459 110358528 . - . gene\_id "XLOC\_047960"; transcript\_id "TCONS\_00079087"; exon\_number "1";  
oId "CUFF.84160.5"; tss\_id "TSS60161";  
chr6 Cufflinks exon110360725 110361425 . - . gene\_id "XLOC\_047960"; transcript\_id "TCONS\_00079087"; exon\_number "2";  
oId "CUFF.84160.5"; tss\_id "TSS60161";  
chr6 Cufflinks exon113938139 113938625 . - . gene\_id "XLOC\_047996"; transcript\_id "TCONS\_00079151"; exon\_number "1";  
oId "CUFF.84352.2"; tss\_id "TSS60212";  
chr6 Cufflinks exon113944087 113944256 . - . gene\_id "XLOC\_047996"; transcript\_id "TCONS\_00079151"; exon\_number "2";  
oId "CUFF.84352.2"; tss\_id "TSS60212";  
chr6 Cufflinks exon113944373 113944848 . - . gene\_id "XLOC\_047996"; transcript\_id "TCONS\_00079151"; exon\_number "3";  
oId "CUFF.84352.2"; tss\_id "TSS60212";  
chr6 Cufflinks exon113948672 113948877 . - . gene\_id "XLOC\_047996"; transcript\_id "TCONS\_00079151"; exon\_number "4";  
oId "CUFF.84352.2"; tss\_id "TSS60212";  
chr6 Cufflinks exon113953502 113953718 . - . gene\_id "XLOC\_047996"; transcript\_id "TCONS\_00079151"; exon\_number "5";  
oId "CUFF.84352.2"; tss\_id "TSS60212";  
chr6 Cufflinks exon113938139 113938625 . - . gene\_id "XLOC\_047996"; transcript\_id "TCONS\_00079150"; exon\_number "1";  
oId "CUFF.84352.1"; tss\_id "TSS60212";  
chr6 Cufflinks exon113944087 113944256 . - . gene\_id "XLOC\_047996"; transcript\_id "TCONS\_00079150"; exon\_number "2";  
oId "CUFF.84352.1"; tss\_id "TSS60212";  
chr6 Cufflinks exon113944373 113944848 . - . gene\_id "XLOC\_047996"; transcript\_id "TCONS\_00079150"; exon\_number "3";  
oId "CUFF.84352.1"; tss\_id "TSS60212";  
chr6 Cufflinks exon113948723 113948877 . - . gene\_id "XLOC\_047996"; transcript\_id "TCONS\_00079150"; exon\_number "4";  
oId "CUFF.84352.1"; tss\_id "TSS60212";  
chr6 Cufflinks exon113953502 113953718 . - . gene\_id "XLOC\_047996"; transcript\_id "TCONS\_00079150"; exon\_number "5";  
oId "CUFF.84352.1"; tss\_id "TSS60212";  
chr6 Cufflinks exon113944737 113944848 . - . gene\_id "XLOC\_047996"; transcript\_id "TCONS\_00079152"; exon\_number "1";  
oId "CUFF.84352.3"; tss\_id "TSS60213";  
chr6 Cufflinks exon113948723 113948877 . - . gene\_id "XLOC\_047996"; transcript\_id "TCONS\_00079152"; exon\_number "2";  
oId "CUFF.84352.3"; tss\_id "TSS60213";  
chr6 Cufflinks exon113971217 113971277 . - . gene\_id "XLOC\_047996"; transcript\_id "TCONS\_00079152"; exon\_number "3";  
oId "CUFF.84352.3"; tss\_id "TSS60213";  
chr6 Cufflinks exon117993976 117995245 . - . gene\_id "XLOC\_048031"; transcript\_id "TCONS\_00079203"; exon\_number "1";  
oId "CUFF.84452.6"; tss\_id "TSS60253";  
chr6 Cufflinks exon117995810 117995998 . - . gene\_id "XLOC\_048031"; transcript\_id "TCONS\_00079203"; exon\_number "2";  
oId "CUFF.84452.6"; tss\_id "TSS60253";  
chr6 Cufflinks exon117996260 117996447 . - . gene\_id "XLOC\_048031"; transcript\_id "TCONS\_00079203"; exon\_number "3";  
oId "CUFF.84452.6"; tss\_id "TSS60253";  
chr6 Cufflinks exon117995999 117996001 . - . gene\_id "XLOC\_048031"; transcript\_id "TCONS\_00079204"; exon\_number "1";  
oId "CUFF.84452.7"; tss\_id "TSS60253";  
chr6 Cufflinks exon117996263 117996483 . - . gene\_id "XLOC\_048031"; transcript\_id "TCONS\_00079204"; exon\_number "2";  
oId "CUFF.84452.7"; tss\_id "TSS60253";

chr6 Cufflinks exon127944107 127944519 . - . gene\_id "XLOC\_048091"; transcript\_id "TCONS\_00079289"; exon\_number "1";  
oId "CUFF.84856.1"; tss\_id "TSS60323";  
chr6 Cufflinks exon 128018485 128018602 . - . gene\_id "XLOC\_048091"; transcript\_id "TCONS\_00079289";  
exon\_number "2"; oId "CUFF.84856.1"; tss\_id "TSS60323";  
chr6 Cufflinks exon 128020610 128021024 . - . gene\_id "XLOC\_048091"; transcript\_id "TCONS\_00079289";  
exon\_number "3"; oId "CUFF.84856.1"; tss\_id "TSS60323";  
chr6 Cufflinks exon 127956446 127956466 . - . gene\_id "XLOC\_048091"; transcript\_id "TCONS\_00079293";  
exon\_number "1"; oId "CUFF.84856.2"; tss\_id "TSS60324";  
chr6 Cufflinks exon 128018485 128018602 . - . gene\_id "XLOC\_048091"; transcript\_id "TCONS\_00079293";  
exon\_number "2"; oId "CUFF.84856.2"; tss\_id "TSS60324";  
chr6 Cufflinks exon 128020610 128020722 . - . gene\_id "XLOC\_048091"; transcript\_id "TCONS\_00079293";  
exon\_number "3"; oId "CUFF.84856.2"; tss\_id "TSS60324";  
chr6 Cufflinks exon 127979225 127981337 . - . gene\_id "XLOC\_048091"; transcript\_id "TCONS\_00079297";  
exon\_number "1"; oId "CUFF.84856.4"; tss\_id "TSS60326";  
chr6 Cufflinks exon 128018485 128018602 . - . gene\_id "XLOC\_048091"; transcript\_id "TCONS\_00079297";  
exon\_number "2"; oId "CUFF.84856.4"; tss\_id "TSS60326";  
chr6 Cufflinks exon 128020610 128020726 . - . gene\_id "XLOC\_048091"; transcript\_id "TCONS\_00079297";  
exon\_number "3"; oId "CUFF.84856.4"; tss\_id "TSS60326";  
chr6 Cufflinks exon 128021437 128021456 . - . gene\_id "XLOC\_048091"; transcript\_id "TCONS\_00079297";  
exon\_number "4"; oId "CUFF.84856.4"; tss\_id "TSS60326";  
chr6 Cufflinks exon 128129164 128129438 . - . gene\_id "XLOC\_048100"; transcript\_id "TCONS\_00079304";  
exon\_number "1"; oId "CUFF.84875.1"; tss\_id "TSS60338";  
chr6 Cufflinks exon 128269299 128269324 . - . gene\_id "XLOC\_048100"; transcript\_id "TCONS\_00079304";  
exon\_number "2"; oId "CUFF.84875.1"; tss\_id "TSS60338";  
chr6 Cufflinks exon 135547424 135557804 . - . gene\_id "XLOC\_048143"; transcript\_id "TCONS\_00079397";  
exon\_number "1"; oId "CUFF.84990.1"; tss\_id "TSS60395";  
chr6 Cufflinks exon 135557963 135558103 . - . gene\_id "XLOC\_048143"; transcript\_id "TCONS\_00079397";  
exon\_number "2"; oId "CUFF.84990.1"; tss\_id "TSS60395";  
chr6 Cufflinks exon 138141997 138145714 . - . gene\_id "XLOC\_048161"; transcript\_id "TCONS\_00079436";  
exon\_number "1"; oId "CUFF.85087.2"; tss\_id "TSS60423";  
chr6 Cufflinks exon 138186296 138186457 . - . gene\_id "XLOC\_048161"; transcript\_id "TCONS\_00079436";  
exon\_number "2"; oId "CUFF.85087.2"; tss\_id "TSS60423";  
chr6 Cufflinks exon 138187720 138188021 . - . gene\_id "XLOC\_048161"; transcript\_id "TCONS\_00079436";  
exon\_number "3"; oId "CUFF.85087.2"; tss\_id "TSS60423";  
chr6 Cufflinks exon 138188779 138189370 . - . gene\_id "XLOC\_048161"; transcript\_id "TCONS\_00079436";  
exon\_number "4"; oId "CUFF.85087.2"; tss\_id "TSS60423";  
chr6 Cufflinks exon 138141997 138145714 . - . gene\_id "XLOC\_048161"; transcript\_id "TCONS\_00079435";  
exon\_number "1"; oId "CUFF.85087.1"; tss\_id "TSS60423";  
chr6 Cufflinks exon 138178864 138179182 . - . gene\_id "XLOC\_048161"; transcript\_id "TCONS\_00079435";  
exon\_number "2"; oId "CUFF.85087.1"; tss\_id "TSS60423";  
chr6 Cufflinks exon 138182119 138188021 . - . gene\_id "XLOC\_048161"; transcript\_id "TCONS\_00079435";  
exon\_number "3"; oId "CUFF.85087.1"; tss\_id "TSS60423";  
chr6 Cufflinks exon 138188779 138189370 . - . gene\_id "XLOC\_048161"; transcript\_id "TCONS\_00079435";

exon\_number "4"; oId "CUFF.85087.1"; tss\_id "TSS60423";  
chr6 Cufflinks exon 138176300 138179182 . - . gene\_id "XLOC\_048161"; transcript\_id "TCONS\_00079444";  
exon\_number "1"; oId "CUFF.85087.4"; tss\_id "TSS60423";  
chr6 Cufflinks exon 138186296 138186509 . - . gene\_id "XLOC\_048161"; transcript\_id "TCONS\_00079444";  
exon\_number "2"; oId "CUFF.85087.4"; tss\_id "TSS60423";  
chr6 Cufflinks exon 138187762 138188021 . - . gene\_id "XLOC\_048161"; transcript\_id "TCONS\_00079444";  
exon\_number "3"; oId "CUFF.85087.4"; tss\_id "TSS60423";  
chr6 Cufflinks exon 138188779 138189370 . - . gene\_id "XLOC\_048161"; transcript\_id "TCONS\_00079444";  
exon\_number "4"; oId "CUFF.85087.4"; tss\_id "TSS60423";  
chr6 Cufflinks exon 143734813 143735490 . - . gene\_id "XLOC\_048216"; transcript\_id "TCONS\_00079512";  
exon\_number "1"; oId "CUFF.85229.2"; tss\_id "TSS60487";  
chr6 Cufflinks exon 143736067 143738844 . - . gene\_id "XLOC\_048216"; transcript\_id "TCONS\_00079512";  
exon\_number "2"; oId "CUFF.85229.2"; tss\_id "TSS60487";  
chr6 Cufflinks exon 147162525 147163945 . - . gene\_id "XLOC\_048260"; transcript\_id "TCONS\_00079585";  
exon\_number "1"; oId "CUFF.85415.1"; tss\_id "TSS60544";  
chr6 Cufflinks exon 147165455 147165848 . - . gene\_id "XLOC\_048260"; transcript\_id "TCONS\_00079585";  
exon\_number "2"; oId "CUFF.85415.1"; tss\_id "TSS60544";  
chr6 Cufflinks exon 147171961 147172467 . - . gene\_id "XLOC\_048260"; transcript\_id "TCONS\_00079585";  
exon\_number "3"; oId "CUFF.85415.1"; tss\_id "TSS60544";  
chr6 Cufflinks exon 147181754 147181879 . - . gene\_id "XLOC\_048260"; transcript\_id "TCONS\_00079585";  
exon\_number "4"; oId "CUFF.85415.1"; tss\_id "TSS60544";  
chr6 Cufflinks exon 147293181 147293206 . - . gene\_id "XLOC\_048260"; transcript\_id "TCONS\_00079585";  
exon\_number "5"; oId "CUFF.85415.1"; tss\_id "TSS60544";  
chr6 Cufflinks exon 147322577 147322679 . - . gene\_id "XLOC\_048260"; transcript\_id "TCONS\_00079585";  
exon\_number "6"; oId "CUFF.85415.1"; tss\_id "TSS60544";  
chr6 Cufflinks exon 147395941 147395983 . - . gene\_id "XLOC\_048260"; transcript\_id "TCONS\_00079585";  
exon\_number "7"; oId "CUFF.85415.1"; tss\_id "TSS60544";  
chr6 Cufflinks exon 147440553 147440613 . - . gene\_id "XLOC\_048260"; transcript\_id "TCONS\_00079585";  
exon\_number "8"; oId "CUFF.85415.1"; tss\_id "TSS60544";  
chr6 Cufflinks exon 147494729 147494783 . - . gene\_id "XLOC\_048260"; transcript\_id "TCONS\_00079585";  
exon\_number "9"; oId "CUFF.85415.1"; tss\_id "TSS60544";  
chr6 Cufflinks exon 147494951 147495084 . - . gene\_id "XLOC\_048260"; transcript\_id "TCONS\_00079585";  
exon\_number "10"; oId "CUFF.85415.1"; tss\_id "TSS60544";  
chr6 Cufflinks exon 147525549 147525750 . - . gene\_id "XLOC\_048260"; transcript\_id "TCONS\_00079585";  
exon\_number "11"; oId "CUFF.85415.1"; tss\_id "TSS60544";  
chr6 Cufflinks exon 156135171 156135804 . - . gene\_id "XLOC\_048321"; transcript\_id "TCONS\_00079685";  
exon\_number "1"; oId "CUFF.85601.1"; tss\_id "TSS60624";  
chr6 Cufflinks exon 156153829 156153945 . - . gene\_id "XLOC\_048321"; transcript\_id "TCONS\_00079685";  
exon\_number "2"; oId "CUFF.85601.1"; tss\_id "TSS60624";  
chr6 Cufflinks exon 156215173 156215250 . - . gene\_id "XLOC\_048321"; transcript\_id "TCONS\_00079685";  
exon\_number "3"; oId "CUFF.85601.1"; tss\_id "TSS60624";  
chr6 Cufflinks exon 156153161 156154028 . - . gene\_id "XLOC\_048321"; transcript\_id "TCONS\_00079689";  
exon\_number "1"; oId "CUFF.85601.2"; tss\_id "TSS60625";



chr6 Cufflinks exon 156207373 156207403 . - . gene\_id "XLOC\_048321"; transcript\_id "TCONS\_00079689";  
exon\_number "2"; oId "CUFF.85601.2"; tss\_id "TSS60625";  
chr6 Cufflinks exon 156425620 156426993 . - . gene\_id "XLOC\_048325"; transcript\_id "TCONS\_00079690";  
exon\_number "1"; oId "CUFF.85607.2"; tss\_id "TSS60629";  
chr6 Cufflinks exon 156480810 156480874 . - . gene\_id "XLOC\_048325"; transcript\_id "TCONS\_00079690";  
exon\_number "2"; oId "CUFF.85607.2"; tss\_id "TSS60629";  
chr6 Cufflinks exon 156573454 156573541 . - . gene\_id "XLOC\_048325"; transcript\_id "TCONS\_00079690";  
exon\_number "3"; oId "CUFF.85607.2"; tss\_id "TSS60629";  
chr6 Cufflinks exon 156586884 156586983 . - . gene\_id "XLOC\_048325"; transcript\_id "TCONS\_00079690";  
exon\_number "4"; oId "CUFF.85607.2"; tss\_id "TSS60629";  
chr6 Cufflinks exon 156425620 156426993 . - . gene\_id "XLOC\_048325"; transcript\_id "TCONS\_00079691";  
exon\_number "1"; oId "CUFF.85607.1"; tss\_id "TSS60630";  
chr6 Cufflinks exon 156573454 156573541 . - . gene\_id "XLOC\_048325"; transcript\_id "TCONS\_00079691";  
exon\_number "2"; oId "CUFF.85607.1"; tss\_id "TSS60630";  
chr6 Cufflinks exon 156615803 156615888 . - . gene\_id "XLOC\_048325"; transcript\_id "TCONS\_00079691";  
exon\_number "3"; oId "CUFF.85607.1"; tss\_id "TSS60630";  
chr6 Cufflinks exon 156652047 156652155 . - . gene\_id "XLOC\_048325"; transcript\_id "TCONS\_00079691";  
exon\_number "4"; oId "CUFF.85607.1"; tss\_id "TSS60630";  
chr6 Cufflinks exon 156713709 156713962 . - . gene\_id "XLOC\_048325"; transcript\_id "TCONS\_00079691";  
exon\_number "5"; oId "CUFF.85607.1"; tss\_id "TSS60630";  
chr6 Cufflinks exon 156573335 156573541 . - . gene\_id "XLOC\_048325"; transcript\_id "TCONS\_00079694";  
exon\_number "1"; oId "CUFF.85607.5"; tss\_id "TSS60631";  
chr6 Cufflinks exon 156615803 156615888 . - . gene\_id "XLOC\_048325"; transcript\_id "TCONS\_00079694";  
exon\_number "2"; oId "CUFF.85607.5"; tss\_id "TSS60631";  
chr6 Cufflinks exon 156652047 156652155 . - . gene\_id "XLOC\_048325"; transcript\_id "TCONS\_00079694";  
exon\_number "3"; oId "CUFF.85607.5"; tss\_id "TSS60631";  
chr6 Cufflinks exon 156718040 156718283 . - . gene\_id "XLOC\_048325"; transcript\_id "TCONS\_00079694";  
exon\_number "4"; oId "CUFF.85607.5"; tss\_id "TSS60631";  
chr6 Cufflinks exon 160119925 160122594 . - . gene\_id "XLOC\_048360"; transcript\_id "TCONS\_00079747";  
exon\_number "1"; oId "CUFF.85745.2"; tss\_id "TSS60672";  
chr6 Cufflinks exon 160147080 160147883 . - . gene\_id "XLOC\_048360"; transcript\_id "TCONS\_00079747";  
exon\_number "2"; oId "CUFF.85745.2"; tss\_id "TSS60672";  
chr6 Cufflinks exon 170470730 170471266 . - . gene\_id "XLOC\_048494"; transcript\_id "TCONS\_00079936";  
exon\_number "1"; oId "CUFF.86077.2"; tss\_id "TSS60830";  
chr6 Cufflinks exon 170475349 170475691 . - . gene\_id "XLOC\_048494"; transcript\_id "TCONS\_00079936";  
exon\_number "2"; oId "CUFF.86077.2"; tss\_id "TSS60830";  
chr6 Cufflinks exon 170470730 170471269 . - . gene\_id "XLOC\_048494"; transcript\_id "TCONS\_00079935";  
exon\_number "1"; oId "CUFF.86077.1"; tss\_id "TSS60830";  
chr6 Cufflinks exon 170475349 170475691 . - . gene\_id "XLOC\_048494"; transcript\_id "TCONS\_00079935";  
exon\_number "2"; oId "CUFF.86077.1"; tss\_id "TSS60830";  
chr6 Cufflinks exon 170574438 170577373 . - . gene\_id "XLOC\_048499"; transcript\_id "TCONS\_00079943";  
exon\_number "1"; oId "CUFF.86083.1"; tss\_id "TSS60836";  
chr6 Cufflinks exon 170578429 170580991 . - . gene\_id "XLOC\_048499"; transcript\_id "TCONS\_00079943";

exon\_number "2"; oId "CUFF.86083.1"; tss\_id "TSS60836";  
chr6 Cufflinks exon 170574438 170577373 . - . gene\_id "XLOC\_048499"; transcript\_id "TCONS\_00079944";  
exon\_number "1"; oId "CUFF.86083.3"; tss\_id "TSS60836";  
chr6 Cufflinks exon 170580547 170581050 . - . gene\_id "XLOC\_048499"; transcript\_id "TCONS\_00079944";  
exon\_number "2"; oId "CUFF.86083.3"; tss\_id "TSS60836";  
chr6 Cufflinks exon 170574438 170577373 . - . gene\_id "XLOC\_048499"; transcript\_id "TCONS\_00079945";  
exon\_number "1"; oId "CUFF.86083.4"; tss\_id "TSS60837";  
chr6 Cufflinks exon 170584419 170584676 . - . gene\_id "XLOC\_048499"; transcript\_id "TCONS\_00079945";  
exon\_number "2"; oId "CUFF.86083.4"; tss\_id "TSS60837";  
chr6 Cufflinks exon 170585773 170585850 . - . gene\_id "XLOC\_048499"; transcript\_id "TCONS\_00079945";  
exon\_number "3"; oId "CUFF.86083.4"; tss\_id "TSS60837";  
chr6 Cufflinks exon 171046174 171048248 . - . gene\_id "XLOC\_048509"; transcript\_id "TCONS\_00079963";  
exon\_number "1"; oId "CUFF.86117.2"; tss\_id "TSS60847";  
chr6 Cufflinks exon 171048997 171049228 . - . gene\_id "XLOC\_048509"; transcript\_id "TCONS\_00079963";  
exon\_number "2"; oId "CUFF.86117.2"; tss\_id "TSS60847";  
chr7 Cufflinks exon 149618 150132 . + . gene\_id "XLOC\_048528"; transcript\_id "TCONS\_00079983"; exon\_number "1"; oId  
"CUFF.86121.2"; tss\_id "TSS60866";  
chr7 Cufflinks exon 152668 153278 . + . gene\_id "XLOC\_048528"; transcript\_id "TCONS\_00079983"; exon\_number "2"; oId  
"CUFF.86121.2"; tss\_id "TSS60866";  
chr7 Cufflinks exon 153409 155643 . + . gene\_id "XLOC\_048528"; transcript\_id "TCONS\_00079983"; exon\_number "3"; oId  
"CUFF.86121.2"; tss\_id "TSS60866";  
chr7 Cufflinks exon 149714 150132 . + . gene\_id "XLOC\_048528"; transcript\_id "TCONS\_00079984"; exon\_number "1"; oId  
"CUFF.86121.3"; tss\_id "TSS60866";  
chr7 Cufflinks exon 153412 155643 . + . gene\_id "XLOC\_048528"; transcript\_id "TCONS\_00079984"; exon\_number "2"; oId  
"CUFF.86121.3"; tss\_id "TSS60866";  
chr7 Cufflinks exon 149718 150132 . + . gene\_id "XLOC\_048528"; transcript\_id "TCONS\_00079986"; exon\_number "1"; oId  
"CUFF.86121.5"; tss\_id "TSS60866";  
chr7 Cufflinks exon 152441 152547 . + . gene\_id "XLOC\_048528"; transcript\_id "TCONS\_00079986"; exon\_number "2"; oId  
"CUFF.86121.5"; tss\_id "TSS60866";  
chr7 Cufflinks exon 153409 155643 . + . gene\_id "XLOC\_048528"; transcript\_id "TCONS\_00079986"; exon\_number "3"; oId  
"CUFF.86121.5"; tss\_id "TSS60866";  
chr7 Cufflinks exon 149718 150132 . + . gene\_id "XLOC\_048528"; transcript\_id "TCONS\_00079985"; exon\_number "1"; oId  
"CUFF.86121.4"; tss\_id "TSS60866";  
chr7 Cufflinks exon 153409 155643 . + . gene\_id "XLOC\_048528"; transcript\_id "TCONS\_00079985"; exon\_number "2"; oId  
"CUFF.86121.4"; tss\_id "TSS60866";  
chr7 Cufflinks exon 559557 561944 . + . gene\_id "XLOC\_048530"; transcript\_id "TCONS\_00079990"; exon\_number "1"; oId  
"CUFF.86130.1"; tss\_id "TSS60870";  
chr7 Cufflinks exon 562091 564870 . + . gene\_id "XLOC\_048530"; transcript\_id "TCONS\_00079990"; exon\_number "2"; oId  
"CUFF.86130.1"; tss\_id "TSS60870";  
chr7 Cufflinks exon 559825 562953 . + . gene\_id "XLOC\_048530"; transcript\_id "TCONS\_00079991"; exon\_number "1"; oId  
"CUFF.86130.2"; tss\_id "TSS60871";  
chr7 Cufflinks exon 563717 563917 . + . gene\_id "XLOC\_048530"; transcript\_id "TCONS\_00079991"; exon\_number "2"; oId  
"CUFF.86130.2"; tss\_id "TSS60871";

chr7 Cufflinks exon564002 564870 . + . gene\_id "XLOC\_048530"; transcript\_id "TCONS\_00079991"; exon\_number "3"; oId "CUFF.86130.2"; tss\_id "TSS60871";

chr7 Cufflinks exon560028 562953 . + . gene\_id "XLOC\_048530"; transcript\_id "TCONS\_00079992"; exon\_number "1"; oId "CUFF.86130.3"; tss\_id "TSS60872";

chr7 Cufflinks exon563717 563917 . + . gene\_id "XLOC\_048530"; transcript\_id "TCONS\_00079992"; exon\_number "2"; oId "CUFF.86130.3"; tss\_id "TSS60872";

chr7 Cufflinks exon564491 564870 . + . gene\_id "XLOC\_048530"; transcript\_id "TCONS\_00079992"; exon\_number "3"; oId "CUFF.86130.3"; tss\_id "TSS60872";

chr7 Cufflinks exon562959 563917 . + . gene\_id "XLOC\_048530"; transcript\_id "TCONS\_00079993"; exon\_number "1"; oId "CUFF.86130.4"; tss\_id "TSS60873";

chr7 Cufflinks exon564491 564870 . + . gene\_id "XLOC\_048530"; transcript\_id "TCONS\_00079993"; exon\_number "2"; oId "CUFF.86130.4"; tss\_id "TSS60873";

chr7 Cufflinks exon2226858 2226887 . + . gene\_id "XLOC\_048553"; transcript\_id "TCONS\_00080040"; exon\_number "1"; oId "CUFF.86225.1"; tss\_id "TSS60908";

chr7 Cufflinks exon2484005 2485569 . + . gene\_id "XLOC\_048553"; transcript\_id "TCONS\_00080040"; exon\_number "2"; oId "CUFF.86225.1"; tss\_id "TSS60908";

chr7 Cufflinks exon2477398 2477555 . + . gene\_id "XLOC\_048560"; transcript\_id "TCONS\_00080052"; exon\_number "1"; oId "CUFF.86252.4"; tss\_id "TSS60916";

chr7 Cufflinks exon2485577 2487485 . + . gene\_id "XLOC\_048560"; transcript\_id "TCONS\_00080052"; exon\_number "2"; oId "CUFF.86252.4"; tss\_id "TSS60916";

chr7 Cufflinks exon2477562 2482141 . + . gene\_id "XLOC\_048560"; transcript\_id "TCONS\_00080053"; exon\_number "1"; oId "CUFF.86252.5"; tss\_id "TSS60917";

chr7 Cufflinks exon2631398 2631440 . + . gene\_id "XLOC\_048560"; transcript\_id "TCONS\_00080053"; exon\_number "2"; oId "CUFF.86252.5"; tss\_id "TSS60917";

chr7 Cufflinks exon7196547 7196830 . + . gene\_id "XLOC\_048611"; transcript\_id "TCONS\_00080168"; exon\_number "1"; oId "CUFF.86469.2"; tss\_id "TSS60988";

chr7 Cufflinks exon7204672 7208261 . + . gene\_id "XLOC\_048611"; transcript\_id "TCONS\_00080168"; exon\_number "2"; oId "CUFF.86469.2"; tss\_id "TSS60988";

chr7 Cufflinks exon7196547 7196830 . + . gene\_id "XLOC\_048611"; transcript\_id "TCONS\_00080169"; exon\_number "1"; oId "CUFF.86469.1"; tss\_id "TSS60988";

chr7 Cufflinks exon7204672 7207694 . + . gene\_id "XLOC\_048611"; transcript\_id "TCONS\_00080169"; exon\_number "2"; oId "CUFF.86469.1"; tss\_id "TSS60988";

chr7 Cufflinks exon7218581 7220740 . + . gene\_id "XLOC\_048611"; transcript\_id "TCONS\_00080169"; exon\_number "3"; oId "CUFF.86469.1"; tss\_id "TSS60988";

chr7 Cufflinks exon17414541 17414679 . + . gene\_id "XLOC\_048646"; transcript\_id "TCONS\_00080222"; exon\_number "1"; oId "CUFF.86590.1"; tss\_id "TSS61031";

chr7 Cufflinks exon17490619 17490685 . + . gene\_id "XLOC\_048646"; transcript\_id "TCONS\_00080222"; exon\_number "2"; oId "CUFF.86590.1"; tss\_id "TSS61031";

chr7 Cufflinks exon17505776 17506880 . + . gene\_id "XLOC\_048646"; transcript\_id "TCONS\_00080222"; exon\_number "3"; oId "CUFF.86590.1"; tss\_id "TSS61031";

chr7 Cufflinks exon20257175 20257245 . + . gene\_id "XLOC\_048658"; transcript\_id "TCONS\_00080244"; exon\_number "1"; oId "CUFF.86633.1"; tss\_id "TSS61048";

chr7 Cufflinks exon20257879 20257986 . + . gene\_id "XLOC\_048658"; transcript\_id "TCONS\_00080244"; exon\_number "2";

oId "CUFF.86633.1"; tss\_id "TSS61048";  
chr7 Cufflinks exon20259115 20259379 . + . gene\_id "XLOC\_048658"; transcript\_id "TCONS\_00080244"; exon\_number "3";  
oId "CUFF.86633.1"; tss\_id "TSS61048";  
chr7 Cufflinks exon20260966 20261322 . + . gene\_id "XLOC\_048658"; transcript\_id "TCONS\_00080244"; exon\_number "4";  
oId "CUFF.86633.1"; tss\_id "TSS61048";  
chr7 Cufflinks exon20257200 20257245 . + . gene\_id "XLOC\_048658"; transcript\_id "TCONS\_00080247"; exon\_number "1";  
oId "CUFF.86633.4"; tss\_id "TSS61048";  
chr7 Cufflinks exon20257411 20257481 . + . gene\_id "XLOC\_048658"; transcript\_id "TCONS\_00080247"; exon\_number "2";  
oId "CUFF.86633.4"; tss\_id "TSS61048";  
chr7 Cufflinks exon20257879 20257986 . + . gene\_id "XLOC\_048658"; transcript\_id "TCONS\_00080247"; exon\_number "3";  
oId "CUFF.86633.4"; tss\_id "TSS61048";  
chr7 Cufflinks exon20259206 20259379 . + . gene\_id "XLOC\_048658"; transcript\_id "TCONS\_00080247"; exon\_number "4";  
oId "CUFF.86633.4"; tss\_id "TSS61048";  
chr7 Cufflinks exon20260966 20261322 . + . gene\_id "XLOC\_048658"; transcript\_id "TCONS\_00080247"; exon\_number "5";  
oId "CUFF.86633.4"; tss\_id "TSS61048";  
chr7 Cufflinks exon20257200 20257245 . + . gene\_id "XLOC\_048658"; transcript\_id "TCONS\_00080246"; exon\_number "1";  
oId "CUFF.86633.3"; tss\_id "TSS61048";  
chr7 Cufflinks exon20257411 20257481 . + . gene\_id "XLOC\_048658"; transcript\_id "TCONS\_00080246"; exon\_number "2";  
oId "CUFF.86633.3"; tss\_id "TSS61048";  
chr7 Cufflinks exon20257879 20257986 . + . gene\_id "XLOC\_048658"; transcript\_id "TCONS\_00080246"; exon\_number "3";  
oId "CUFF.86633.3"; tss\_id "TSS61048";  
chr7 Cufflinks exon20259115 20259379 . + . gene\_id "XLOC\_048658"; transcript\_id "TCONS\_00080246"; exon\_number "4";  
oId "CUFF.86633.3"; tss\_id "TSS61048";  
chr7 Cufflinks exon20260966 20261322 . + . gene\_id "XLOC\_048658"; transcript\_id "TCONS\_00080246"; exon\_number "5";  
oId "CUFF.86633.3"; tss\_id "TSS61048";  
chr7 Cufflinks exon20257200 20257245 . + . gene\_id "XLOC\_048658"; transcript\_id "TCONS\_00080245"; exon\_number "1";  
oId "CUFF.86633.2"; tss\_id "TSS61048";  
chr7 Cufflinks exon20257879 20257986 . + . gene\_id "XLOC\_048658"; transcript\_id "TCONS\_00080245"; exon\_number "2";  
oId "CUFF.86633.2"; tss\_id "TSS61048";  
chr7 Cufflinks exon20259206 20259379 . + . gene\_id "XLOC\_048658"; transcript\_id "TCONS\_00080245"; exon\_number "3";  
oId "CUFF.86633.2"; tss\_id "TSS61048";  
chr7 Cufflinks exon20260966 20261322 . + . gene\_id "XLOC\_048658"; transcript\_id "TCONS\_00080245"; exon\_number "4";  
oId "CUFF.86633.2"; tss\_id "TSS61048";  
chr7 Cufflinks exon22893760 22893899 . + . gene\_id "XLOC\_048671"; transcript\_id "TCONS\_00080263"; exon\_number "1";  
oId "CUFF.86698.1"; tss\_id "TSS61061";  
chr7 Cufflinks exon22896141 22896175 . + . gene\_id "XLOC\_048671"; transcript\_id "TCONS\_00080263"; exon\_number "2";  
oId "CUFF.86698.1"; tss\_id "TSS61061";  
chr7 Cufflinks exon22896592 22905504 . + . gene\_id "XLOC\_048671"; transcript\_id "TCONS\_00080263"; exon\_number "3";  
oId "CUFF.86698.1"; tss\_id "TSS61061";  
chr7 Cufflinks exon22893775 22896175 . + . gene\_id "XLOC\_048671"; transcript\_id "TCONS\_00080264"; exon\_number "1";  
oId "CUFF.86698.2"; tss\_id "TSS61061";  
chr7 Cufflinks exon22896592 22896635 . + . gene\_id "XLOC\_048671"; transcript\_id "TCONS\_00080264"; exon\_number "2";  
oId "CUFF.86698.2"; tss\_id "TSS61061";

|                                        |          |   |   |   |                                                                         |
|----------------------------------------|----------|---|---|---|-------------------------------------------------------------------------|
| chr7 Cufflinks exon22900166            | 22900257 | . | + | . | gene_id "XLOC_048671"; transcript_id "TCONS_00080264"; exon_number "3"; |
| oId "CUFF.86698.2"; tss_id "TSS61061"; |          |   |   |   |                                                                         |
| chr7 Cufflinks exon22908634            | 22913286 | . | + | . | gene_id "XLOC_048671"; transcript_id "TCONS_00080264"; exon_number "4"; |
| oId "CUFF.86698.2"; tss_id "TSS61061"; |          |   |   |   |                                                                         |
| chr7 Cufflinks exon22893835            | 22896175 | . | + | . | gene_id "XLOC_048671"; transcript_id "TCONS_00080266"; exon_number "1"; |
| oId "CUFF.86698.5"; tss_id "TSS61061"; |          |   |   |   |                                                                         |
| chr7 Cufflinks exon22896592            | 22905504 | . | + | . | gene_id "XLOC_048671"; transcript_id "TCONS_00080266"; exon_number "2"; |
| oId "CUFF.86698.5"; tss_id "TSS61061"; |          |   |   |   |                                                                         |
| chr7 Cufflinks exon22893885            | 22894583 | . | + | . | gene_id "XLOC_048671"; transcript_id "TCONS_00080267"; exon_number "1"; |
| oId "CUFF.86698.6"; tss_id "TSS61062"; |          |   |   |   |                                                                         |
| chr7 Cufflinks exon22896141            | 22896175 | . | + | . | gene_id "XLOC_048671"; transcript_id "TCONS_00080267"; exon_number "2"; |
| oId "CUFF.86698.6"; tss_id "TSS61062"; |          |   |   |   |                                                                         |
| chr7 Cufflinks exon22896592            | 22896635 | . | + | . | gene_id "XLOC_048671"; transcript_id "TCONS_00080267"; exon_number "3"; |
| oId "CUFF.86698.6"; tss_id "TSS61062"; |          |   |   |   |                                                                         |
| chr7 Cufflinks exon22898190            | 22905504 | . | + | . | gene_id "XLOC_048671"; transcript_id "TCONS_00080267"; exon_number "4"; |
| oId "CUFF.86698.6"; tss_id "TSS61062"; |          |   |   |   |                                                                         |
| chr7 Cufflinks exon22893885            | 22900257 | . | + | . | gene_id "XLOC_048671"; transcript_id "TCONS_00080268"; exon_number "1"; |
| oId "CUFF.86698.7"; tss_id "TSS61062"; |          |   |   |   |                                                                         |
| chr7 Cufflinks exon22908634            | 22913286 | . | + | . | gene_id "XLOC_048671"; transcript_id "TCONS_00080268"; exon_number "2"; |
| oId "CUFF.86698.7"; tss_id "TSS61062"; |          |   |   |   |                                                                         |
| chr7 Cufflinks exon22893886            | 22896178 | . | + | . | gene_id "XLOC_048671"; transcript_id "TCONS_00080269"; exon_number "1"; |
| oId "CUFF.86698.8"; tss_id "TSS61062"; |          |   |   |   |                                                                         |
| chr7 Cufflinks exon22896595            | 22898449 | . | + | . | gene_id "XLOC_048671"; transcript_id "TCONS_00080269"; exon_number "2"; |
| oId "CUFF.86698.8"; tss_id "TSS61062"; |          |   |   |   |                                                                         |
| chr7 Cufflinks exon22900166            | 22905504 | . | + | . | gene_id "XLOC_048671"; transcript_id "TCONS_00080269"; exon_number "3"; |
| oId "CUFF.86698.8"; tss_id "TSS61062"; |          |   |   |   |                                                                         |
| chr7 Cufflinks exon22893901            | 22894583 | . | + | . | gene_id "XLOC_048671"; transcript_id "TCONS_00080270"; exon_number "1"; |
| oId "CUFF.86698.9"; tss_id "TSS61062"; |          |   |   |   |                                                                         |
| chr7 Cufflinks exon22896141            | 22896175 | . | + | . | gene_id "XLOC_048671"; transcript_id "TCONS_00080270"; exon_number "2"; |
| oId "CUFF.86698.9"; tss_id "TSS61062"; |          |   |   |   |                                                                         |
| chr7 Cufflinks exon22896592            | 22905504 | . | + | . | gene_id "XLOC_048671"; transcript_id "TCONS_00080270"; exon_number "3"; |
| oId "CUFF.86698.9"; tss_id "TSS61062"; |          |   |   |   |                                                                         |
| chr7 Cufflinks exon23510850            | 23514913 | . | + | . | gene_id "XLOC_048682"; transcript_id "TCONS_00080288"; exon_number "1"; |
| oId "CUFF.86729.1"; tss_id "TSS61075"; |          |   |   |   |                                                                         |
| chr7 Cufflinks exon23519627            | 23523188 | . | + | . | gene_id "XLOC_048682"; transcript_id "TCONS_00080288"; exon_number "2"; |
| oId "CUFF.86729.1"; tss_id "TSS61075"; |          |   |   |   |                                                                         |
| chr7 Cufflinks exon26438179            | 26438641 | . | + | . | gene_id "XLOC_048705"; transcript_id "TCONS_00080332"; exon_number "1"; |
| oId "CUFF.86849.2"; tss_id "TSS61103"; |          |   |   |   |                                                                         |
| chr7 Cufflinks exon26438866            | 26439193 | . | + | . | gene_id "XLOC_048705"; transcript_id "TCONS_00080332"; exon_number "2"; |
| oId "CUFF.86849.2"; tss_id "TSS61103"; |          |   |   |   |                                                                         |
| chr7 Cufflinks exon26438179            | 26438641 | . | + | . | gene_id "XLOC_048705"; transcript_id "TCONS_00080333"; exon_number "1"; |
| oId "CUFF.86849.1"; tss_id "TSS61103"; |          |   |   |   |                                                                         |
| chr7 Cufflinks exon26443016            | 26443137 | . | + | . | gene_id "XLOC_048705"; transcript_id "TCONS_00080333"; exon_number "2"; |

|                                        |   |   |   |                                                                         |  |
|----------------------------------------|---|---|---|-------------------------------------------------------------------------|--|
| oId "CUFF.86849.1"; tss_id "TSS61103"; |   |   |   |                                                                         |  |
| chr7 Cufflinks exon26533415 26533883   | . | + | . | gene_id "XLOC_048705"; transcript_id "TCONS_00080333"; exon_number "3"; |  |
| oId "CUFF.86849.1"; tss_id "TSS61103"; |   |   |   |                                                                         |  |
| chr7 Cufflinks exon26534639 26534819   | . | + | . | gene_id "XLOC_048705"; transcript_id "TCONS_00080333"; exon_number "4"; |  |
| oId "CUFF.86849.1"; tss_id "TSS61103"; |   |   |   |                                                                         |  |
| chr7 Cufflinks exon26535734 26535838   | . | + | . | gene_id "XLOC_048705"; transcript_id "TCONS_00080333"; exon_number "5"; |  |
| oId "CUFF.86849.1"; tss_id "TSS61103"; |   |   |   |                                                                         |  |
| chr7 Cufflinks exon26561214 26561282   | . | + | . | gene_id "XLOC_048705"; transcript_id "TCONS_00080333"; exon_number "6"; |  |
| oId "CUFF.86849.1"; tss_id "TSS61103"; |   |   |   |                                                                         |  |
| chr7 Cufflinks exon26438447 26438641   | . | + | . | gene_id "XLOC_048705"; transcript_id "TCONS_00080335"; exon_number "1"; |  |
| oId "CUFF.86849.4"; tss_id "TSS61104"; |   |   |   |                                                                         |  |
| chr7 Cufflinks exon26443016 26443137   | . | + | . | gene_id "XLOC_048705"; transcript_id "TCONS_00080335"; exon_number "2"; |  |
| oId "CUFF.86849.4"; tss_id "TSS61104"; |   |   |   |                                                                         |  |
| chr7 Cufflinks exon26451805 26451859   | . | + | . | gene_id "XLOC_048705"; transcript_id "TCONS_00080335"; exon_number "3"; |  |
| oId "CUFF.86849.4"; tss_id "TSS61104"; |   |   |   |                                                                         |  |
| chr7 Cufflinks exon26533415 26534508   | . | + | . | gene_id "XLOC_048705"; transcript_id "TCONS_00080335"; exon_number "4"; |  |
| oId "CUFF.86849.4"; tss_id "TSS61104"; |   |   |   |                                                                         |  |
| chr7 Cufflinks exon26534639 26534819   | . | + | . | gene_id "XLOC_048705"; transcript_id "TCONS_00080335"; exon_number "5"; |  |
| oId "CUFF.86849.4"; tss_id "TSS61104"; |   |   |   |                                                                         |  |
| chr7 Cufflinks exon26535734 26535986   | . | + | . | gene_id "XLOC_048705"; transcript_id "TCONS_00080335"; exon_number "6"; |  |
| oId "CUFF.86849.4"; tss_id "TSS61104"; |   |   |   |                                                                         |  |
| chr7 Cufflinks exon26438447 26438641   | . | + | . | gene_id "XLOC_048705"; transcript_id "TCONS_00080334"; exon_number "1"; |  |
| oId "CUFF.86849.3"; tss_id "TSS61104"; |   |   |   |                                                                         |  |
| chr7 Cufflinks exon26443016 26443137   | . | + | . | gene_id "XLOC_048705"; transcript_id "TCONS_00080334"; exon_number "2"; |  |
| oId "CUFF.86849.3"; tss_id "TSS61104"; |   |   |   |                                                                         |  |
| chr7 Cufflinks exon26533415 26534508   | . | + | . | gene_id "XLOC_048705"; transcript_id "TCONS_00080334"; exon_number "3"; |  |
| oId "CUFF.86849.3"; tss_id "TSS61104"; |   |   |   |                                                                         |  |
| chr7 Cufflinks exon26534639 26534819   | . | + | . | gene_id "XLOC_048705"; transcript_id "TCONS_00080334"; exon_number "4"; |  |
| oId "CUFF.86849.3"; tss_id "TSS61104"; |   |   |   |                                                                         |  |
| chr7 Cufflinks exon26535429 26535501   | . | + | . | gene_id "XLOC_048705"; transcript_id "TCONS_00080334"; exon_number "5"; |  |
| oId "CUFF.86849.3"; tss_id "TSS61104"; |   |   |   |                                                                         |  |
| chr7 Cufflinks exon26535734 26535986   | . | + | . | gene_id "XLOC_048705"; transcript_id "TCONS_00080334"; exon_number "6"; |  |
| oId "CUFF.86849.3"; tss_id "TSS61104"; |   |   |   |                                                                         |  |
| chr7 Cufflinks exon27135713 27136007   | . | + | . | gene_id "XLOC_048710"; transcript_id "TCONS_00080343"; exon_number "1"; |  |
| oId "CUFF.86862.3"; tss_id "TSS61110"; |   |   |   |                                                                         |  |
| chr7 Cufflinks exon27138717 27138985   | . | + | . | gene_id "XLOC_048710"; transcript_id "TCONS_00080343"; exon_number "2"; |  |
| oId "CUFF.86862.3"; tss_id "TSS61110"; |   |   |   |                                                                         |  |
| chr7 Cufflinks exon27139398 27139877   | . | + | . | gene_id "XLOC_048710"; transcript_id "TCONS_00080343"; exon_number "3"; |  |
| oId "CUFF.86862.3"; tss_id "TSS61110"; |   |   |   |                                                                         |  |
| chr7 Cufflinks exon27135713 27136007   | . | + | . | gene_id "XLOC_048710"; transcript_id "TCONS_00080342"; exon_number "1"; |  |
| oId "CUFF.86862.2"; tss_id "TSS61110"; |   |   |   |                                                                         |  |
| chr7 Cufflinks exon27139398 27139877   | . | + | . | gene_id "XLOC_048710"; transcript_id "TCONS_00080342"; exon_number "2"; |  |
| oId "CUFF.86862.2"; tss_id "TSS61110"; |   |   |   |                                                                         |  |

|                                         |          |   |   |   |                                                                         |
|-----------------------------------------|----------|---|---|---|-------------------------------------------------------------------------|
| chr7 Cufflinks exon27240040             | 27240140 | . | + | . | gene_id "XLOC_048712"; transcript_id "TCONS_00080345"; exon_number "1"; |
| oId "CUFF.86893.1"; tss_id "TSS61112";  |          |   |   |   |                                                                         |
| chr7 Cufflinks exon27240242             | 27242257 | . | + | . | gene_id "XLOC_048712"; transcript_id "TCONS_00080345"; exon_number "2"; |
| oId "CUFF.86893.1"; tss_id "TSS61112";  |          |   |   |   |                                                                         |
| chr7 Cufflinks exon27244331             | 27246878 | . | + | . | gene_id "XLOC_048712"; transcript_id "TCONS_00080345"; exon_number "3"; |
| oId "CUFF.86893.1"; tss_id "TSS61112";  |          |   |   |   |                                                                         |
| chr7 Cufflinks exon30168472             | 30168495 | . | + | . | gene_id "XLOC_048780"; transcript_id "TCONS_00080428"; exon_number "1"; |
| oId "CUFF.87051.1"; tss_id "TSS61190";  |          |   |   |   |                                                                         |
| chr7 Cufflinks exon30168882             | 30170099 | . | + | . | gene_id "XLOC_048780"; transcript_id "TCONS_00080428"; exon_number "2"; |
| oId "CUFF.87051.1"; tss_id "TSS61190";  |          |   |   |   |                                                                         |
| chr7 Cufflinks exon44399584             | 44399595 | . | + | . | gene_id "XLOC_048908"; transcript_id "TCONS_00080614"; exon_number "1"; |
| oId "CUFF.87598.1"; tss_id "TSS61340";  |          |   |   |   |                                                                         |
| chr7 Cufflinks exon44507636             | 44507969 | . | + | . | gene_id "XLOC_048908"; transcript_id "TCONS_00080614"; exon_number "2"; |
| oId "CUFF.87598.1"; tss_id "TSS61340";  |          |   |   |   |                                                                         |
| chr7 Cufflinks exon44888108             | 44888120 | . | + | . | gene_id "XLOC_048914"; transcript_id "TCONS_00080630"; exon_number "1"; |
| oId "CUFF.87639.4"; tss_id "TSS61348";  |          |   |   |   |                                                                         |
| chr7 Cufflinks exon44889058             | 44889263 | . | + | . | gene_id "XLOC_048914"; transcript_id "TCONS_00080630"; exon_number "2"; |
| oId "CUFF.87639.4"; tss_id "TSS61348";  |          |   |   |   |                                                                         |
| chr7 Cufflinks exon45980034             | 45980479 | . | + | . | gene_id "XLOC_048928"; transcript_id "TCONS_00080664"; exon_number "1"; |
| oId "CUFF.87674.4"; tss_id "TSS61370";  |          |   |   |   |                                                                         |
| chr7 Cufflinks exon46017949             | 46018067 | . | + | . | gene_id "XLOC_048928"; transcript_id "TCONS_00080664"; exon_number "2"; |
| oId "CUFF.87674.4"; tss_id "TSS61370";  |          |   |   |   |                                                                         |
| chr7 Cufflinks exon46019508             | 46019626 | . | + | . | gene_id "XLOC_048928"; transcript_id "TCONS_00080664"; exon_number "3"; |
| oId "CUFF.87674.4"; tss_id "TSS61370";  |          |   |   |   |                                                                         |
| chr7 Cufflinks exon46030132             | 46030676 | . | + | . | gene_id "XLOC_048928"; transcript_id "TCONS_00080664"; exon_number "4"; |
| oId "CUFF.87674.4"; tss_id "TSS61370";  |          |   |   |   |                                                                         |
| chr7 Cufflinks exon46076216             | 46076399 | . | + | . | gene_id "XLOC_048928"; transcript_id "TCONS_00080664"; exon_number "5"; |
| oId "CUFF.87674.4"; tss_id "TSS61370";  |          |   |   |   |                                                                         |
| chr7 Cufflinks exon46088921             | 46088946 | . | + | . | gene_id "XLOC_048928"; transcript_id "TCONS_00080664"; exon_number "6"; |
| oId "CUFF.87674.4"; tss_id "TSS61370";  |          |   |   |   |                                                                         |
| chr7 Cufflinks exon45980069             | 45980479 | . | + | . | gene_id "XLOC_048928"; transcript_id "TCONS_00080665"; exon_number "1"; |
| oId "CUFF.87674.8"; tss_id "TSS61370";  |          |   |   |   |                                                                         |
| chr7 Cufflinks exon46017949             | 46018067 | . | + | . | gene_id "XLOC_048928"; transcript_id "TCONS_00080665"; exon_number "2"; |
| oId "CUFF.87674.8"; tss_id "TSS61370";  |          |   |   |   |                                                                         |
| chr7 Cufflinks exon46019508             | 46020343 | . | + | . | gene_id "XLOC_048928"; transcript_id "TCONS_00080665"; exon_number "3"; |
| oId "CUFF.87674.8"; tss_id "TSS61370";  |          |   |   |   |                                                                         |
| chr7 Cufflinks exon46040184             | 46040299 | . | + | . | gene_id "XLOC_048928"; transcript_id "TCONS_00080668"; exon_number "1"; |
| oId "CUFF.87674.11"; tss_id "TSS61371"; |          |   |   |   |                                                                         |
| chr7 Cufflinks exon46076216             | 46076399 | . | + | . | gene_id "XLOC_048928"; transcript_id "TCONS_00080668"; exon_number "2"; |
| oId "CUFF.87674.11"; tss_id "TSS61371"; |          |   |   |   |                                                                         |
| chr7 Cufflinks exon46167596             | 46167741 | . | + | . | gene_id "XLOC_048928"; transcript_id "TCONS_00080668"; exon_number "3"; |
| oId "CUFF.87674.11"; tss_id "TSS61371"; |          |   |   |   |                                                                         |
| chr7 Cufflinks exon46219553             | 46219624 | . | + | . | gene_id "XLOC_048928"; transcript_id "TCONS_00080668"; exon_number "4"; |

|                                         |   |   |   |                                                                         |  |
|-----------------------------------------|---|---|---|-------------------------------------------------------------------------|--|
| oId "CUFF.87674.11"; tss_id "TSS61371"; |   |   |   |                                                                         |  |
| chr7 Cufflinks exon55836063 55836279    | . | + | . | gene_id "XLOC_048967"; transcript_id "TCONS_00080723"; exon_number "1"; |  |
| oId "CUFF.87809.3"; tss_id "TSS61420";  |   |   |   |                                                                         |  |
| chr7 Cufflinks exon55840877 55841379    | . | + | . | gene_id "XLOC_048967"; transcript_id "TCONS_00080723"; exon_number "2"; |  |
| oId "CUFF.87809.3"; tss_id "TSS61420";  |   |   |   |                                                                         |  |
| chr7 Cufflinks exon63361205 63361416    | . | + | . | gene_id "XLOC_048989"; transcript_id "TCONS_00080752"; exon_number "1"; |  |
| oId "CUFF.87875.5"; tss_id "TSS61442";  |   |   |   |                                                                         |  |
| chr7 Cufflinks exon63363900 63363968    | . | + | . | gene_id "XLOC_048989"; transcript_id "TCONS_00080752"; exon_number "2"; |  |
| oId "CUFF.87875.5"; tss_id "TSS61442";  |   |   |   |                                                                         |  |
| chr7 Cufflinks exon63364990 63365116    | . | + | . | gene_id "XLOC_048989"; transcript_id "TCONS_00080752"; exon_number "3"; |  |
| oId "CUFF.87875.5"; tss_id "TSS61442";  |   |   |   |                                                                         |  |
| chr7 Cufflinks exon63374502 63374927    | . | + | . | gene_id "XLOC_048989"; transcript_id "TCONS_00080752"; exon_number "4"; |  |
| oId "CUFF.87875.5"; tss_id "TSS61442";  |   |   |   |                                                                         |  |
| chr7 Cufflinks exon64194843 64195005    | . | + | . | gene_id "XLOC_049004"; transcript_id "TCONS_00080776"; exon_number "1"; |  |
| oId "CUFF.87927.1"; tss_id "TSS61459";  |   |   |   |                                                                         |  |
| chr7 Cufflinks exon64196788 64197660    | . | + | . | gene_id "XLOC_049004"; transcript_id "TCONS_00080776"; exon_number "2"; |  |
| oId "CUFF.87927.1"; tss_id "TSS61459";  |   |   |   |                                                                         |  |
| chr7 Cufflinks exon64194879 64195003    | . | + | . | gene_id "XLOC_049004"; transcript_id "TCONS_00080777"; exon_number "1"; |  |
| oId "CUFF.87927.2"; tss_id "TSS61459";  |   |   |   |                                                                         |  |
| chr7 Cufflinks exon64196786 64197660    | . | + | . | gene_id "XLOC_049004"; transcript_id "TCONS_00080777"; exon_number "2"; |  |
| oId "CUFF.87927.2"; tss_id "TSS61459";  |   |   |   |                                                                         |  |
| chr7 Cufflinks exon66795398 66798194    | . | + | . | gene_id "XLOC_049070"; transcript_id "TCONS_00080901"; exon_number "1"; |  |
| oId "CUFF.88248.1"; tss_id "TSS61541";  |   |   |   |                                                                         |  |
| chr7 Cufflinks exon66971143 66971215    | . | + | . | gene_id "XLOC_049070"; transcript_id "TCONS_00080901"; exon_number "2"; |  |
| oId "CUFF.88248.1"; tss_id "TSS61541";  |   |   |   |                                                                         |  |
| chr7 Cufflinks exon73149271 73149420    | . | + | . | gene_id "XLOC_049159"; transcript_id "TCONS_00081012"; exon_number "1"; |  |
| oId "CUFF.88446.1"; tss_id "TSS61636";  |   |   |   |                                                                         |  |
| chr7 Cufflinks exon73149571 73149829    | . | + | . | gene_id "XLOC_049159"; transcript_id "TCONS_00081012"; exon_number "2"; |  |
| oId "CUFF.88446.1"; tss_id "TSS61636";  |   |   |   |                                                                         |  |
| chr7 Cufflinks exon73150058 73150178    | . | + | . | gene_id "XLOC_049159"; transcript_id "TCONS_00081012"; exon_number "3"; |  |
| oId "CUFF.88446.1"; tss_id "TSS61636";  |   |   |   |                                                                         |  |
| chr7 Cufflinks exon73150260 73150399    | . | + | . | gene_id "XLOC_049159"; transcript_id "TCONS_00081012"; exon_number "4"; |  |
| oId "CUFF.88446.1"; tss_id "TSS61636";  |   |   |   |                                                                         |  |
| chr7 Cufflinks exon99334429 99334668    | . | + | . | gene_id "XLOC_049381"; transcript_id "TCONS_00081392"; exon_number "1"; |  |
| oId "CUFF.89334.2"; tss_id "TSS61913";  |   |   |   |                                                                         |  |
| chr7 Cufflinks exon99335509 99335851    | . | + | . | gene_id "XLOC_049381"; transcript_id "TCONS_00081392"; exon_number "2"; |  |
| oId "CUFF.89334.2"; tss_id "TSS61913";  |   |   |   |                                                                         |  |
| chr7 Cufflinks exon99334429 99334672    | . | + | . | gene_id "XLOC_049381"; transcript_id "TCONS_00081391"; exon_number "1"; |  |
| oId "CUFF.89334.1"; tss_id "TSS61913";  |   |   |   |                                                                         |  |
| chr7 Cufflinks exon99335307 99335851    | . | + | . | gene_id "XLOC_049381"; transcript_id "TCONS_00081391"; exon_number "2"; |  |
| oId "CUFF.89334.1"; tss_id "TSS61913";  |   |   |   |                                                                         |  |
| chr7 Cufflinks exon100034293 100036125  | . | + | . | gene_id "XLOC_049402"; transcript_id "TCONS_00081431"; exon_number "1"; |  |
| oId "CUFF.89444.1"; tss_id "TSS61937";  |   |   |   |                                                                         |  |



|                                        |           |   |   |   |                                                                         |
|----------------------------------------|-----------|---|---|---|-------------------------------------------------------------------------|
| chr7 Cufflinks exon100037357           | 100037634 | . | + | . | gene_id "XLOC_049402"; transcript_id "TCONS_00081431"; exon_number "2"; |
| oId "CUFF.89444.1"; tss_id "TSS61937"; |           |   |   |   |                                                                         |
| chr7 Cufflinks exon100806693           | 100807353 | . | + | . | gene_id "XLOC_049422"; transcript_id "TCONS_00081478"; exon_number "1"; |
| oId "CUFF.89522.1"; tss_id "TSS61968"; |           |   |   |   |                                                                         |
| chr7 Cufflinks exon100812873           | 100814200 | . | + | . | gene_id "XLOC_049422"; transcript_id "TCONS_00081478"; exon_number "2"; |
| oId "CUFF.89522.1"; tss_id "TSS61968"; |           |   |   |   |                                                                         |
| chr7 Cufflinks exon101979383           | 101979559 | . | + | . | gene_id "XLOC_049435"; transcript_id "TCONS_00081498"; exon_number "1"; |
| oId "CUFF.89565.1"; tss_id "TSS61984"; |           |   |   |   |                                                                         |
| chr7 Cufflinks exon101982627           | 101982713 | . | + | . | gene_id "XLOC_049435"; transcript_id "TCONS_00081498"; exon_number "2"; |
| oId "CUFF.89565.1"; tss_id "TSS61984"; |           |   |   |   |                                                                         |
| chr7 Cufflinks exon101988713           | 101989477 | . | + | . | gene_id "XLOC_049435"; transcript_id "TCONS_00081498"; exon_number "3"; |
| oId "CUFF.89565.1"; tss_id "TSS61984"; |           |   |   |   |                                                                         |
| chr7 Cufflinks exon117111033           | 117111091 | . | + | . | gene_id "XLOC_049543"; transcript_id "TCONS_00081666"; exon_number "1"; |
| oId "CUFF.90232.2"; tss_id "TSS62114"; |           |   |   |   |                                                                         |
| chr7 Cufflinks exon117115745           | 117116912 | . | + | . | gene_id "XLOC_049543"; transcript_id "TCONS_00081666"; exon_number "2"; |
| oId "CUFF.90232.2"; tss_id "TSS62114"; |           |   |   |   |                                                                         |
| chr7 Cufflinks exon117117196           | 117117309 | . | + | . | gene_id "XLOC_049543"; transcript_id "TCONS_00081666"; exon_number "3"; |
| oId "CUFF.90232.2"; tss_id "TSS62114"; |           |   |   |   |                                                                         |
| chr7 Cufflinks exon117118696           | 117119399 | . | + | . | gene_id "XLOC_049543"; transcript_id "TCONS_00081666"; exon_number "4"; |
| oId "CUFF.90232.2"; tss_id "TSS62114"; |           |   |   |   |                                                                         |
| chr7 Cufflinks exon117119516           | 117119748 | . | + | . | gene_id "XLOC_049543"; transcript_id "TCONS_00081666"; exon_number "5"; |
| oId "CUFF.90232.2"; tss_id "TSS62114"; |           |   |   |   |                                                                         |
| chr7 Cufflinks exon117120202           | 117124728 | . | + | . | gene_id "XLOC_049543"; transcript_id "TCONS_00081666"; exon_number "6"; |
| oId "CUFF.90232.2"; tss_id "TSS62114"; |           |   |   |   |                                                                         |
| chr7 Cufflinks exon117111033           | 117111091 | . | + | . | gene_id "XLOC_049543"; transcript_id "TCONS_00081665"; exon_number "1"; |
| oId "CUFF.90232.1"; tss_id "TSS62114"; |           |   |   |   |                                                                         |
| chr7 Cufflinks exon117115745           | 117115862 | . | + | . | gene_id "XLOC_049543"; transcript_id "TCONS_00081665"; exon_number "2"; |
| oId "CUFF.90232.1"; tss_id "TSS62114"; |           |   |   |   |                                                                         |
| chr7 Cufflinks exon117119298           | 117119399 | . | + | . | gene_id "XLOC_049543"; transcript_id "TCONS_00081665"; exon_number "3"; |
| oId "CUFF.90232.1"; tss_id "TSS62114"; |           |   |   |   |                                                                         |
| chr7 Cufflinks exon117119516           | 117119748 | . | + | . | gene_id "XLOC_049543"; transcript_id "TCONS_00081665"; exon_number "4"; |
| oId "CUFF.90232.1"; tss_id "TSS62114"; |           |   |   |   |                                                                         |
| chr7 Cufflinks exon117120202           | 117124728 | . | + | . | gene_id "XLOC_049543"; transcript_id "TCONS_00081665"; exon_number "5"; |
| oId "CUFF.90232.1"; tss_id "TSS62114"; |           |   |   |   |                                                                         |
| chr7 Cufflinks exon133803934           | 133804386 | . | + | . | gene_id "XLOC_049639"; transcript_id "TCONS_00081849"; exon_number "1"; |
| oId "CUFF.90562.1"; tss_id "TSS62241"; |           |   |   |   |                                                                         |
| chr7 Cufflinks exon133808529           | 133809798 | . | + | . | gene_id "XLOC_049639"; transcript_id "TCONS_00081849"; exon_number "2"; |
| oId "CUFF.90562.1"; tss_id "TSS62241"; |           |   |   |   |                                                                         |
| chr7 Cufflinks exon135665649           | 135665806 | . | + | . | gene_id "XLOC_049661"; transcript_id "TCONS_00081886"; exon_number "1"; |
| oId "CUFF.90668.2"; tss_id "TSS62269"; |           |   |   |   |                                                                         |
| chr7 Cufflinks exon135862000           | 135862161 | . | + | . | gene_id "XLOC_049661"; transcript_id "TCONS_00081886"; exon_number "2"; |
| oId "CUFF.90668.2"; tss_id "TSS62269"; |           |   |   |   |                                                                         |
| chr7 Cufflinks exon135926898           | 135931111 | . | + | . | gene_id "XLOC_049661"; transcript_id "TCONS_00081886"; exon_number "3"; |

oId "CUFF.90668.2"; tss\_id "TSS62269";  
chr7 Cufflinks exon135665687 135665806 . + . gene\_id "XLOC\_049661"; transcript\_id "TCONS\_00081888"; exon\_number "1";  
oId "CUFF.90668.4"; tss\_id "TSS62269";  
chr7 Cufflinks exon135705449 135705541 . + . gene\_id "XLOC\_049661"; transcript\_id "TCONS\_00081888"; exon\_number "2";  
oId "CUFF.90668.4"; tss\_id "TSS62269";  
chr7 Cufflinks exon135862000 135862161 . + . gene\_id "XLOC\_049661"; transcript\_id "TCONS\_00081888"; exon\_number "3";  
oId "CUFF.90668.4"; tss\_id "TSS62269";  
chr7 Cufflinks exon135926898 135931111 . + . gene\_id "XLOC\_049661"; transcript\_id "TCONS\_00081888"; exon\_number "4";  
oId "CUFF.90668.4"; tss\_id "TSS62269";  
chr7 Cufflinks exon135665687 135665806 . + . gene\_id "XLOC\_049661"; transcript\_id "TCONS\_00081887"; exon\_number "1";  
oId "CUFF.90668.3"; tss\_id "TSS62269";  
chr7 Cufflinks exon135743214 135743253 . + . gene\_id "XLOC\_049661"; transcript\_id "TCONS\_00081887"; exon\_number "2";  
oId "CUFF.90668.3"; tss\_id "TSS62269";  
chr7 Cufflinks exon135862000 135862161 . + . gene\_id "XLOC\_049661"; transcript\_id "TCONS\_00081887"; exon\_number "3";  
oId "CUFF.90668.3"; tss\_id "TSS62269";  
chr7 Cufflinks exon135926898 135931111 . + . gene\_id "XLOC\_049661"; transcript\_id "TCONS\_00081887"; exon\_number "4";  
oId "CUFF.90668.3"; tss\_id "TSS62269";  
chr7 Cufflinks exon135665695 135665806 . + . gene\_id "XLOC\_049661"; transcript\_id "TCONS\_00081889"; exon\_number "1";  
oId "CUFF.90668.5"; tss\_id "TSS62269";  
chr7 Cufflinks exon135705449 135705541 . + . gene\_id "XLOC\_049661"; transcript\_id "TCONS\_00081889"; exon\_number "2";  
oId "CUFF.90668.5"; tss\_id "TSS62269";  
chr7 Cufflinks exon135801819 135801936 . + . gene\_id "XLOC\_049661"; transcript\_id "TCONS\_00081889"; exon\_number "3";  
oId "CUFF.90668.5"; tss\_id "TSS62269";  
chr7 Cufflinks exon135926898 135931111 . + . gene\_id "XLOC\_049661"; transcript\_id "TCONS\_00081889"; exon\_number "4";  
oId "CUFF.90668.5"; tss\_id "TSS62269";  
chr7 Cufflinks exon135665695 135665806 . + . gene\_id "XLOC\_049661"; transcript\_id "TCONS\_00081890"; exon\_number "1";  
oId "CUFF.90668.6"; tss\_id "TSS62269";  
chr7 Cufflinks exon135926898 135927119 . + . gene\_id "XLOC\_049661"; transcript\_id "TCONS\_00081890"; exon\_number "2";  
oId "CUFF.90668.6"; tss\_id "TSS62269";  
chr7 Cufflinks exon135951714 135951812 . + . gene\_id "XLOC\_049661"; transcript\_id "TCONS\_00081890"; exon\_number "3";  
oId "CUFF.90668.6"; tss\_id "TSS62269";  
chr7 Cufflinks exon139876878 139877937 . + . gene\_id "XLOC\_049701"; transcript\_id "TCONS\_00081944"; exon\_number "1";  
oId "CUFF.90824.1"; tss\_id "TSS62315";  
chr7 Cufflinks exon139878863 139879440 . + . gene\_id "XLOC\_049701"; transcript\_id "TCONS\_00081944"; exon\_number "2";  
oId "CUFF.90824.1"; tss\_id "TSS62315";  
chr7 Cufflinks exon142502629 142503670 . + . gene\_id "XLOC\_049752"; transcript\_id "TCONS\_00082041"; exon\_number "1";  
oId "CUFF.91010.14"; tss\_id "TSS62382";  
chr7 Cufflinks exon142504618 142508952 . + . gene\_id "XLOC\_049752"; transcript\_id "TCONS\_00082041"; exon\_number "2";  
oId "CUFF.91010.14"; tss\_id "TSS62382";  
chr7 Cufflinks exon142510057 142510446 . + . gene\_id "XLOC\_049760"; transcript\_id "TCONS\_00082042"; exon\_number "1";  
oId "CUFF.91024.2"; tss\_id "TSS62390";  
chr7 Cufflinks exon142513677 142513811 . + . gene\_id "XLOC\_049760"; transcript\_id "TCONS\_00082042"; exon\_number "2";  
oId "CUFF.91024.2"; tss\_id "TSS62390";

chr7 Cufflinks exon142514442 142515158 . + . gene\_id "XLOC\_049760"; transcript\_id "TCONS\_00082042"; exon\_number "3";  
oId "CUFF.91024.2"; tss\_id "TSS62390";  
chr7 Cufflinks exon142510461 142511215 . + . gene\_id "XLOC\_049760"; transcript\_id "TCONS\_00082043"; exon\_number "1";  
oId "CUFF.91024.3"; tss\_id "TSS62391";  
chr7 Cufflinks exon142513677 142513811 . + . gene\_id "XLOC\_049760"; transcript\_id "TCONS\_00082043"; exon\_number "2";  
oId "CUFF.91024.3"; tss\_id "TSS62391";  
chr7 Cufflinks exon142514442 142515158 . + . gene\_id "XLOC\_049760"; transcript\_id "TCONS\_00082043"; exon\_number "3";  
oId "CUFF.91024.3"; tss\_id "TSS62391";  
chr7 Cufflinks exon143104852 143104979 . + . gene\_id "XLOC\_049774"; transcript\_id "TCONS\_00082063"; exon\_number "1";  
oId "CUFF.91101.1"; tss\_id "TSS62410";  
chr7 Cufflinks exon143112161 143112292 . + . gene\_id "XLOC\_049774"; transcript\_id "TCONS\_00082063"; exon\_number "2";  
oId "CUFF.91101.1"; tss\_id "TSS62410";  
chr7 Cufflinks exon143112630 143112923 . + . gene\_id "XLOC\_049774"; transcript\_id "TCONS\_00082063"; exon\_number "3";  
oId "CUFF.91101.1"; tss\_id "TSS62410";  
chr7 Cufflinks exon143104852 143104979 . + . gene\_id "XLOC\_049774"; transcript\_id "TCONS\_00082064"; exon\_number "1";  
oId "CUFF.91101.2"; tss\_id "TSS62410";  
chr7 Cufflinks exon143112161 143112292 . + . gene\_id "XLOC\_049774"; transcript\_id "TCONS\_00082064"; exon\_number "2";  
oId "CUFF.91101.2"; tss\_id "TSS62410";  
chr7 Cufflinks exon143193059 143193802 . + . gene\_id "XLOC\_049774"; transcript\_id "TCONS\_00082064"; exon\_number "3";  
oId "CUFF.91101.2"; tss\_id "TSS62410";  
chr7 Cufflinks exon143104888 143104983 . + . gene\_id "XLOC\_049774"; transcript\_id "TCONS\_00082065"; exon\_number "1";  
oId "CUFF.91101.3"; tss\_id "TSS62410";  
chr7 Cufflinks exon143112161 143112292 . + . gene\_id "XLOC\_049774"; transcript\_id "TCONS\_00082065"; exon\_number "2";  
oId "CUFF.91101.3"; tss\_id "TSS62410";  
chr7 Cufflinks exon143112630 143112923 . + . gene\_id "XLOC\_049774"; transcript\_id "TCONS\_00082065"; exon\_number "3";  
oId "CUFF.91101.3"; tss\_id "TSS62410";  
chr7 Cufflinks exon143104906 143104983 . + . gene\_id "XLOC\_049774"; transcript\_id "TCONS\_00082066"; exon\_number "1";  
oId "CUFF.91101.4"; tss\_id "TSS62410";  
chr7 Cufflinks exon143111417 143111538 . + . gene\_id "XLOC\_049774"; transcript\_id "TCONS\_00082066"; exon\_number "2";  
oId "CUFF.91101.4"; tss\_id "TSS62410";  
chr7 Cufflinks exon143112161 143112292 . + . gene\_id "XLOC\_049774"; transcript\_id "TCONS\_00082066"; exon\_number "3";  
oId "CUFF.91101.4"; tss\_id "TSS62410";  
chr7 Cufflinks exon143112630 143112923 . + . gene\_id "XLOC\_049774"; transcript\_id "TCONS\_00082066"; exon\_number "4";  
oId "CUFF.91101.4"; tss\_id "TSS62410";  
chr7 Cufflinks exon143104906 143104979 . + . gene\_id "XLOC\_049774"; transcript\_id "TCONS\_00082067"; exon\_number "1";  
oId "CUFF.91101.5"; tss\_id "TSS62410";  
chr7 Cufflinks exon143112161 143112292 . + . gene\_id "XLOC\_049774"; transcript\_id "TCONS\_00082067"; exon\_number "2";  
oId "CUFF.91101.5"; tss\_id "TSS62410";  
chr7 Cufflinks exon143201867 143201923 . + . gene\_id "XLOC\_049774"; transcript\_id "TCONS\_00082067"; exon\_number "3";  
oId "CUFF.91101.5"; tss\_id "TSS62410";  
chr7 Cufflinks exon143215375 143215610 . + . gene\_id "XLOC\_049774"; transcript\_id "TCONS\_00082067"; exon\_number "4";  
oId "CUFF.91101.5"; tss\_id "TSS62410";  
chr7 Cufflinks exon143216024 143220540 . + . gene\_id "XLOC\_049774"; transcript\_id "TCONS\_00082067"; exon\_number "5";

oId "CUFF.91101.5"; tss\_id "TSS62410";  
chr7 Cufflinks exon143111451 143111538 . + . gene\_id "XLOC\_049774"; transcript\_id "TCONS\_00082068"; exon\_number "1";  
oId "CUFF.91101.6"; tss\_id "TSS62411";  
chr7 Cufflinks exon143112161 143112292 . + . gene\_id "XLOC\_049774"; transcript\_id "TCONS\_00082068"; exon\_number "2";  
oId "CUFF.91101.6"; tss\_id "TSS62411";  
chr7 Cufflinks exon143216024 143220540 . + . gene\_id "XLOC\_049774"; transcript\_id "TCONS\_00082068"; exon\_number "3";  
oId "CUFF.91101.6"; tss\_id "TSS62411";  
chr7 Cufflinks exon148582094 148582575 . + . gene\_id "XLOC\_049796"; transcript\_id "TCONS\_00082094"; exon\_number "1";  
oId "CUFF.91159.1"; tss\_id "TSS62436";  
chr7 Cufflinks exon148583449 148586368 . + . gene\_id "XLOC\_049796"; transcript\_id "TCONS\_00082094"; exon\_number "2";  
oId "CUFF.91159.1"; tss\_id "TSS62436";  
chr7 Cufflinks exon151574127 151574225 . + . gene\_id "XLOC\_049862"; transcript\_id "TCONS\_00082240"; exon\_number "1";  
oId "CUFF.91544.2"; tss\_id "TSS62535";  
chr7 Cufflinks exon151574922 151574951 . + . gene\_id "XLOC\_049862"; transcript\_id "TCONS\_00082240"; exon\_number "2";  
oId "CUFF.91544.2"; tss\_id "TSS62535";  
chr7 Cufflinks exon151575647 151576308 . + . gene\_id "XLOC\_049862"; transcript\_id "TCONS\_00082240"; exon\_number "3";  
oId "CUFF.91544.2"; tss\_id "TSS62535";  
chr7 Cufflinks exon154997143 154997537 . + . gene\_id "XLOC\_049894"; transcript\_id "TCONS\_00082278"; exon\_number "1";  
oId "CUFF.91632.1"; tss\_id "TSS62568";  
chr7 Cufflinks exon155001841 155001925 . + . gene\_id "XLOC\_049894"; transcript\_id "TCONS\_00082278"; exon\_number "2";  
oId "CUFF.91632.1"; tss\_id "TSS62568";  
chr7 Cufflinks exon154997159 154997537 . + . gene\_id "XLOC\_049894"; transcript\_id "TCONS\_00082279"; exon\_number "1";  
oId "CUFF.91632.3"; tss\_id "TSS62568";  
chr7 Cufflinks exon155003310 155003397 . + . gene\_id "XLOC\_049894"; transcript\_id "TCONS\_00082279"; exon\_number "2";  
oId "CUFF.91632.3"; tss\_id "TSS62568";  
chr7 Cufflinks exon155005912 155005987 . + . gene\_id "XLOC\_049894"; transcript\_id "TCONS\_00082279"; exon\_number "3";  
oId "CUFF.91632.3"; tss\_id "TSS62568";  
chr7 Cufflinks exon155006092 155007269 . + . gene\_id "XLOC\_049894"; transcript\_id "TCONS\_00082279"; exon\_number "4";  
oId "CUFF.91632.3"; tss\_id "TSS62568";  
chr7 Cufflinks exon154997661 154999188 . + . gene\_id "XLOC\_049894"; transcript\_id "TCONS\_00082280"; exon\_number "1";  
oId "CUFF.91632.4"; tss\_id "TSS62569";  
chr7 Cufflinks exon155001844 155005987 . + . gene\_id "XLOC\_049894"; transcript\_id "TCONS\_00082280"; exon\_number "2";  
oId "CUFF.91632.4"; tss\_id "TSS62569";  
chr7 Cufflinks exon155007758 155008516 . + . gene\_id "XLOC\_049894"; transcript\_id "TCONS\_00082280"; exon\_number "3";  
oId "CUFF.91632.4"; tss\_id "TSS62569";  
chr7 Cufflinks exon155156767 155157161 . + . gene\_id "XLOC\_049897"; transcript\_id "TCONS\_00082286"; exon\_number "1";  
oId "CUFF.91646.3"; tss\_id "TSS62572";  
chr7 Cufflinks exon155162497 155163158 . + . gene\_id "XLOC\_049897"; transcript\_id "TCONS\_00082286"; exon\_number "2";  
oId "CUFF.91646.3"; tss\_id "TSS62572";  
chr7 Cufflinks exon155156767 155157161 . + . gene\_id "XLOC\_049897"; transcript\_id "TCONS\_00082285"; exon\_number "1";  
oId "CUFF.91646.2"; tss\_id "TSS62572";  
chr7 Cufflinks exon155157875 155158085 . + . gene\_id "XLOC\_049897"; transcript\_id "TCONS\_00082285"; exon\_number "2";  
oId "CUFF.91646.2"; tss\_id "TSS62572";

|                                        |           |   |   |   |                                                                         |
|----------------------------------------|-----------|---|---|---|-------------------------------------------------------------------------|
| chr7 Cufflinks exon155162497           | 155163158 | . | + | . | gene_id "XLOC_049897"; transcript_id "TCONS_00082285"; exon_number "3"; |
| oId "CUFF.91646.2"; tss_id "TSS62572"; |           |   |   |   |                                                                         |
| chr7 Cufflinks exon155156767           | 155158085 | . | + | . | gene_id "XLOC_049897"; transcript_id "TCONS_00082284"; exon_number "1"; |
| oId "CUFF.91646.1"; tss_id "TSS62572"; |           |   |   |   |                                                                         |
| chr7 Cufflinks exon155162497           | 155163158 | . | + | . | gene_id "XLOC_049897"; transcript_id "TCONS_00082284"; exon_number "2"; |
| oId "CUFF.91646.1"; tss_id "TSS62572"; |           |   |   |   |                                                                         |
| chr7 Cufflinks exon156803507           | 156804001 | . | + | . | gene_id "XLOC_049913"; transcript_id "TCONS_00082309"; exon_number "1"; |
| oId "CUFF.91727.1"; tss_id "TSS62591"; |           |   |   |   |                                                                         |
| chr7 Cufflinks exon156808583           | 156810598 | . | + | . | gene_id "XLOC_049913"; transcript_id "TCONS_00082309"; exon_number "2"; |
| oId "CUFF.91727.1"; tss_id "TSS62591"; |           |   |   |   |                                                                         |
| chr7 Cufflinks exon156807219           | 156807253 | . | + | . | gene_id "XLOC_049913"; transcript_id "TCONS_00082310"; exon_number "1"; |
| oId "CUFF.91727.2"; tss_id "TSS62592"; |           |   |   |   |                                                                         |
| chr7 Cufflinks exon156808583           | 156810598 | . | + | . | gene_id "XLOC_049913"; transcript_id "TCONS_00082310"; exon_number "2"; |
| oId "CUFF.91727.2"; tss_id "TSS62592"; |           |   |   |   |                                                                         |
| chr7 Cufflinks exon158743366           | 158743468 | . | + | . | gene_id "XLOC_049932"; transcript_id "TCONS_00082333"; exon_number "1"; |
| oId "CUFF.91801.1"; tss_id "TSS62612"; |           |   |   |   |                                                                         |
| chr7 Cufflinks exon158743530           | 158743762 | . | + | . | gene_id "XLOC_049932"; transcript_id "TCONS_00082333"; exon_number "2"; |
| oId "CUFF.91801.1"; tss_id "TSS62612"; |           |   |   |   |                                                                         |
| chr7 Cufflinks exon158744709           | 158744854 | . | + | . | gene_id "XLOC_049932"; transcript_id "TCONS_00082333"; exon_number "3"; |
| oId "CUFF.91801.1"; tss_id "TSS62612"; |           |   |   |   |                                                                         |
| chr7 Cufflinks exon158745443           | 158745624 | . | + | . | gene_id "XLOC_049932"; transcript_id "TCONS_00082333"; exon_number "4"; |
| oId "CUFF.91801.1"; tss_id "TSS62612"; |           |   |   |   |                                                                         |
| chr7 Cufflinks exon158746797           | 158746902 | . | + | . | gene_id "XLOC_049932"; transcript_id "TCONS_00082333"; exon_number "5"; |
| oId "CUFF.91801.1"; tss_id "TSS62612"; |           |   |   |   |                                                                         |
| chr7 Cufflinks exon158748810           | 158754988 | . | + | . | gene_id "XLOC_049932"; transcript_id "TCONS_00082333"; exon_number "6"; |
| oId "CUFF.91801.1"; tss_id "TSS62612"; |           |   |   |   |                                                                         |
| chr7 Cufflinks exon158743413           | 158743468 | . | + | . | gene_id "XLOC_049932"; transcript_id "TCONS_00082335"; exon_number "1"; |
| oId "CUFF.91801.3"; tss_id "TSS62612"; |           |   |   |   |                                                                         |
| chr7 Cufflinks exon158743530           | 158744854 | . | + | . | gene_id "XLOC_049932"; transcript_id "TCONS_00082335"; exon_number "2"; |
| oId "CUFF.91801.3"; tss_id "TSS62612"; |           |   |   |   |                                                                         |
| chr7 Cufflinks exon158749274           | 158749374 | . | + | . | gene_id "XLOC_049932"; transcript_id "TCONS_00082335"; exon_number "3"; |
| oId "CUFF.91801.3"; tss_id "TSS62612"; |           |   |   |   |                                                                         |
| chr7 Cufflinks exon158749908           | 158750730 | . | + | . | gene_id "XLOC_049932"; transcript_id "TCONS_00082335"; exon_number "4"; |
| oId "CUFF.91801.3"; tss_id "TSS62612"; |           |   |   |   |                                                                         |
| chr7 Cufflinks exon158750837           | 158754988 | . | + | . | gene_id "XLOC_049932"; transcript_id "TCONS_00082335"; exon_number "5"; |
| oId "CUFF.91801.3"; tss_id "TSS62612"; |           |   |   |   |                                                                         |
| chr7 Cufflinks exon158743413           | 158744288 | . | + | . | gene_id "XLOC_049932"; transcript_id "TCONS_00082334"; exon_number "1"; |
| oId "CUFF.91801.2"; tss_id "TSS62612"; |           |   |   |   |                                                                         |
| chr7 Cufflinks exon158744709           | 158744854 | . | + | . | gene_id "XLOC_049932"; transcript_id "TCONS_00082334"; exon_number "2"; |
| oId "CUFF.91801.2"; tss_id "TSS62612"; |           |   |   |   |                                                                         |
| chr7 Cufflinks exon158746797           | 158746902 | . | + | . | gene_id "XLOC_049932"; transcript_id "TCONS_00082334"; exon_number "3"; |
| oId "CUFF.91801.2"; tss_id "TSS62612"; |           |   |   |   |                                                                         |
| chr7 Cufflinks exon158749274           | 158749374 | . | + | . | gene_id "XLOC_049932"; transcript_id "TCONS_00082334"; exon_number "4"; |

oId "CUFF.91801.2"; tss\_id "TSS62612";  
chr7 Cufflinks exon158749908 158754988 . + . gene\_id "XLOC\_049932"; transcript\_id "TCONS\_00082334"; exon\_number "5";  
oId "CUFF.91801.2"; tss\_id "TSS62612";  
chr7 Cufflinks exon158743914 158744287 . + . gene\_id "XLOC\_049932"; transcript\_id "TCONS\_00082336"; exon\_number "1";  
oId "CUFF.91801.4"; tss\_id "TSS62613";  
chr7 Cufflinks exon158744709 158744854 . + . gene\_id "XLOC\_049932"; transcript\_id "TCONS\_00082336"; exon\_number "2";  
oId "CUFF.91801.4"; tss\_id "TSS62613";  
chr7 Cufflinks exon158745374 158745406 . + . gene\_id "XLOC\_049932"; transcript\_id "TCONS\_00082336"; exon\_number "3";  
oId "CUFF.91801.4"; tss\_id "TSS62613";  
chr7 Cufflinks exon158743921 158746902 . + . gene\_id "XLOC\_049932"; transcript\_id "TCONS\_00082337"; exon\_number "1";  
oId "CUFF.91801.5"; tss\_id "TSS62613";  
chr7 Cufflinks exon158748810 158749161 . + . gene\_id "XLOC\_049932"; transcript\_id "TCONS\_00082337"; exon\_number "2";  
oId "CUFF.91801.5"; tss\_id "TSS62613";  
chr7 Cufflinks exon158749274 158749374 . + . gene\_id "XLOC\_049932"; transcript\_id "TCONS\_00082337"; exon\_number "3";  
oId "CUFF.91801.5"; tss\_id "TSS62613";  
chr7 Cufflinks exon158749908 158754988 . + . gene\_id "XLOC\_049932"; transcript\_id "TCONS\_00082337"; exon\_number "4";  
oId "CUFF.91801.5"; tss\_id "TSS62613";  
chr7 Cufflinks exon158799360 158799518 . + . gene\_id "XLOC\_049935"; transcript\_id "TCONS\_00082341"; exon\_number "1";  
oId "CUFF.91809.1"; tss\_id "TSS62617";  
chr7 Cufflinks exon158801466 158802129 . + . gene\_id "XLOC\_049935"; transcript\_id "TCONS\_00082341"; exon\_number "2";  
oId "CUFF.91809.1"; tss\_id "TSS62617";  
chr7 Cufflinks exon158813176 158813539 . + . gene\_id "XLOC\_049935"; transcript\_id "TCONS\_00082341"; exon\_number "3";  
oId "CUFF.91809.1"; tss\_id "TSS62617";  
chr7 Cufflinks exon158814379 158814501 . + . gene\_id "XLOC\_049935"; transcript\_id "TCONS\_00082341"; exon\_number "4";  
oId "CUFF.91809.1"; tss\_id "TSS62617";  
chr7 Cufflinks exon158799360 158799518 . + . gene\_id "XLOC\_049935"; transcript\_id "TCONS\_00082342"; exon\_number "1";  
oId "CUFF.91809.2"; tss\_id "TSS62617";  
chr7 Cufflinks exon158801241 158802129 . + . gene\_id "XLOC\_049935"; transcript\_id "TCONS\_00082342"; exon\_number "2";  
oId "CUFF.91809.2"; tss\_id "TSS62617";  
chr7 Cufflinks exon158809149 158810337 . + . gene\_id "XLOC\_049935"; transcript\_id "TCONS\_00082342"; exon\_number "3";  
oId "CUFF.91809.2"; tss\_id "TSS62617";  
chr7 Cufflinks exon158812998 158813539 . + . gene\_id "XLOC\_049935"; transcript\_id "TCONS\_00082342"; exon\_number "4";  
oId "CUFF.91809.2"; tss\_id "TSS62617";  
chr7 Cufflinks exon158814364 158814488 . + . gene\_id "XLOC\_049935"; transcript\_id "TCONS\_00082342"; exon\_number "5";  
oId "CUFF.91809.2"; tss\_id "TSS62617";  
chr7 Cufflinks exon158817858 158818929 . + . gene\_id "XLOC\_049935"; transcript\_id "TCONS\_00082342"; exon\_number "6";  
oId "CUFF.91809.2"; tss\_id "TSS62617";  
chr7 Cufflinks exon5646906 5647374 . - . gene\_id "XLOC\_050032"; transcript\_id "TCONS\_00082490"; exon\_number "1"; oId  
"CUFF.86366.1"; tss\_id "TSS62736";  
chr7 Cufflinks exon5655584 5655825 . - . gene\_id "XLOC\_050032"; transcript\_id "TCONS\_00082490"; exon\_number "2"; oId  
"CUFF.86366.1"; tss\_id "TSS62736";  
chr7 Cufflinks exon5651584 5653583 . - . gene\_id "XLOC\_050032"; transcript\_id "TCONS\_00082494"; exon\_number "1"; oId  
"CUFF.86366.2"; tss\_id "TSS62737";

chr7 Cufflinks exon5655582 5655966 . - . gene\_id "XLOC\_050032"; transcript\_id "TCONS\_00082494"; exon\_number "2"; oId "CUFF.86366.2"; tss\_id "TSS62737";

chr7 Cufflinks exon5653626 5654442 . - . gene\_id "XLOC\_050032"; transcript\_id "TCONS\_00082495"; exon\_number "1"; oId "CUFF.86366.3"; tss\_id "TSS62737";

chr7 Cufflinks exon5655582 5655966 . - . gene\_id "XLOC\_050032"; transcript\_id "TCONS\_00082495"; exon\_number "2"; oId "CUFF.86366.3"; tss\_id "TSS62737";

chr7 Cufflinks exon17470254 17475857 . - . gene\_id "XLOC\_050092"; transcript\_id "TCONS\_00082625"; exon\_number "1"; oId "CUFF.86591.4"; tss\_id "TSS62827";

chr7 Cufflinks exon17496302 17496396 . - . gene\_id "XLOC\_050092"; transcript\_id "TCONS\_00082625"; exon\_number "2"; oId "CUFF.86591.4"; tss\_id "TSS62827";

chr7 Cufflinks exon17470254 17475860 . - . gene\_id "XLOC\_050092"; transcript\_id "TCONS\_00082626"; exon\_number "1"; oId "CUFF.86591.1"; tss\_id "TSS62828";

chr7 Cufflinks exon17496306 17500177 . - . gene\_id "XLOC\_050092"; transcript\_id "TCONS\_00082626"; exon\_number "2"; oId "CUFF.86591.1"; tss\_id "TSS62828";

chr7 Cufflinks exon17503024 17503537 . - . gene\_id "XLOC\_050092"; transcript\_id "TCONS\_00082626"; exon\_number "3"; oId "CUFF.86591.1"; tss\_id "TSS62828";

chr7 Cufflinks exon17470254 17475858 . - . gene\_id "XLOC\_050092"; transcript\_id "TCONS\_00082627"; exon\_number "1"; oId "CUFF.86591.6"; tss\_id "TSS62829";

chr7 Cufflinks exon17496307 17496386 . - . gene\_id "XLOC\_050092"; transcript\_id "TCONS\_00082627"; exon\_number "2"; oId "CUFF.86591.6"; tss\_id "TSS62829";

chr7 Cufflinks exon17497083 17497213 . - . gene\_id "XLOC\_050092"; transcript\_id "TCONS\_00082627"; exon\_number "3"; oId "CUFF.86591.6"; tss\_id "TSS62829";

chr7 Cufflinks exon17500106 17500177 . - . gene\_id "XLOC\_050092"; transcript\_id "TCONS\_00082627"; exon\_number "4"; oId "CUFF.86591.6"; tss\_id "TSS62829";

chr7 Cufflinks exon17503024 17503166 . - . gene\_id "XLOC\_050092"; transcript\_id "TCONS\_00082627"; exon\_number "5"; oId "CUFF.86591.6"; tss\_id "TSS62829";

chr7 Cufflinks exon17504794 17504850 . - . gene\_id "XLOC\_050092"; transcript\_id "TCONS\_00082627"; exon\_number "6"; oId "CUFF.86591.6"; tss\_id "TSS62829";

chr7 Cufflinks exon17506790 17506904 . - . gene\_id "XLOC\_050092"; transcript\_id "TCONS\_00082627"; exon\_number "7"; oId "CUFF.86591.6"; tss\_id "TSS62829";

chr7 Cufflinks exon17522151 17522345 . - . gene\_id "XLOC\_050092"; transcript\_id "TCONS\_00082627"; exon\_number "8"; oId "CUFF.86591.6"; tss\_id "TSS62829";

chr7 Cufflinks exon17470254 17475858 . - . gene\_id "XLOC\_050092"; transcript\_id "TCONS\_00082628"; exon\_number "1"; oId "CUFF.86591.5"; tss\_id "TSS62830";

chr7 Cufflinks exon17496307 17496386 . - . gene\_id "XLOC\_050092"; transcript\_id "TCONS\_00082628"; exon\_number "2"; oId "CUFF.86591.5"; tss\_id "TSS62830";

chr7 Cufflinks exon17497083 17497213 . - . gene\_id "XLOC\_050092"; transcript\_id "TCONS\_00082628"; exon\_number "3"; oId "CUFF.86591.5"; tss\_id "TSS62830";

chr7 Cufflinks exon17500106 17500177 . - . gene\_id "XLOC\_050092"; transcript\_id "TCONS\_00082628"; exon\_number "4"; oId "CUFF.86591.5"; tss\_id "TSS62830";

chr7 Cufflinks exon17503024 17503166 . - . gene\_id "XLOC\_050092"; transcript\_id "TCONS\_00082628"; exon\_number "5"; oId "CUFF.86591.5"; tss\_id "TSS62830";

chr7 Cufflinks exon17504794 17504850 . - . gene\_id "XLOC\_050092"; transcript\_id "TCONS\_00082628"; exon\_number "6";

|                                                                                |   |   |   |                                                                         |
|--------------------------------------------------------------------------------|---|---|---|-------------------------------------------------------------------------|
| oId "CUFF.86591.5"; tss_id "TSS62830";<br>chr7 Cufflinks exon17523029 17523158 | . | - | . | gene_id "XLOC_050092"; transcript_id "TCONS_00082628"; exon_number "7"; |
| oId "CUFF.86591.5"; tss_id "TSS62830";<br>chr7 Cufflinks exon17564057 17564128 | . | - | . | gene_id "XLOC_050092"; transcript_id "TCONS_00082628"; exon_number "8"; |
| oId "CUFF.86591.5"; tss_id "TSS62830";<br>chr7 Cufflinks exon17470254 17475857 | . | - | . | gene_id "XLOC_050092"; transcript_id "TCONS_00082629"; exon_number "1"; |
| oId "CUFF.86591.3"; tss_id "TSS62831";<br>chr7 Cufflinks exon17496306 17496386 | . | - | . | gene_id "XLOC_050092"; transcript_id "TCONS_00082629"; exon_number "2"; |
| oId "CUFF.86591.3"; tss_id "TSS62831";<br>chr7 Cufflinks exon17500106 17500177 | . | - | . | gene_id "XLOC_050092"; transcript_id "TCONS_00082629"; exon_number "3"; |
| oId "CUFF.86591.3"; tss_id "TSS62831";<br>chr7 Cufflinks exon17503024 17503166 | . | - | . | gene_id "XLOC_050092"; transcript_id "TCONS_00082629"; exon_number "4"; |
| oId "CUFF.86591.3"; tss_id "TSS62831";<br>chr7 Cufflinks exon17504794 17504850 | . | - | . | gene_id "XLOC_050092"; transcript_id "TCONS_00082629"; exon_number "5"; |
| oId "CUFF.86591.3"; tss_id "TSS62831";<br>chr7 Cufflinks exon17523030 17523158 | . | - | . | gene_id "XLOC_050092"; transcript_id "TCONS_00082629"; exon_number "6"; |
| oId "CUFF.86591.3"; tss_id "TSS62831";<br>chr7 Cufflinks exon17598376 17598533 | . | - | . | gene_id "XLOC_050092"; transcript_id "TCONS_00082629"; exon_number "7"; |
| oId "CUFF.86591.3"; tss_id "TSS62831";<br>chr7 Cufflinks exon20973426 20974797 | . | - | . | gene_id "XLOC_050112"; transcript_id "TCONS_00082653"; exon_number "1"; |
| oId "CUFF.86645.1"; tss_id "TSS62851";<br>chr7 Cufflinks exon20990910 20991049 | . | - | . | gene_id "XLOC_050112"; transcript_id "TCONS_00082653"; exon_number "2"; |
| oId "CUFF.86645.1"; tss_id "TSS62851";<br>chr7 Cufflinks exon20999137 20999251 | . | - | . | gene_id "XLOC_050112"; transcript_id "TCONS_00082653"; exon_number "3"; |
| oId "CUFF.86645.1"; tss_id "TSS62851";<br>chr7 Cufflinks exon21003653 21003750 | . | - | . | gene_id "XLOC_050112"; transcript_id "TCONS_00082653"; exon_number "4"; |
| oId "CUFF.86645.1"; tss_id "TSS62851";<br>chr7 Cufflinks exon22146460 22153439 | . | - | . | gene_id "XLOC_050116"; transcript_id "TCONS_00082660"; exon_number "1"; |
| oId "CUFF.86677.2"; tss_id "TSS62856";<br>chr7 Cufflinks exon22153664 22155089 | . | - | . | gene_id "XLOC_050116"; transcript_id "TCONS_00082660"; exon_number "2"; |
| oId "CUFF.86677.2"; tss_id "TSS62856";<br>chr7 Cufflinks exon22146460 22150736 | . | - | . | gene_id "XLOC_050116"; transcript_id "TCONS_00082659"; exon_number "1"; |
| oId "CUFF.86677.1"; tss_id "TSS62856";<br>chr7 Cufflinks exon22152101 22153439 | . | - | . | gene_id "XLOC_050116"; transcript_id "TCONS_00082659"; exon_number "2"; |
| oId "CUFF.86677.1"; tss_id "TSS62856";<br>chr7 Cufflinks exon22153664 22155089 | . | - | . | gene_id "XLOC_050116"; transcript_id "TCONS_00082659"; exon_number "3"; |
| oId "CUFF.86677.1"; tss_id "TSS62856";<br>chr7 Cufflinks exon29685538 29690955 | . | - | . | gene_id "XLOC_050222"; transcript_id "TCONS_00082829"; exon_number "1"; |
| oId "CUFF.87001.3"; tss_id "TSS62989";<br>chr7 Cufflinks exon29724389 29724754 | . | - | . | gene_id "XLOC_050222"; transcript_id "TCONS_00082829"; exon_number "2"; |
| oId "CUFF.87001.3"; tss_id "TSS62989";<br>chr7 Cufflinks exon29685538 29689319 | . | - | . | gene_id "XLOC_050222"; transcript_id "TCONS_00082830"; exon_number "1"; |
| oId "CUFF.87001.1"; tss_id "TSS62990";                                         |   |   |   |                                                                         |



|                                                         |          |   |   |   |                                                                         |
|---------------------------------------------------------|----------|---|---|---|-------------------------------------------------------------------------|
| chr7 Cufflinks exon29689934                             | 29690955 | . | - | . | gene_id "XLOC_050222"; transcript_id "TCONS_00082830"; exon_number "2"; |
| oId "CUFF.87001.1"; tss_id "TSS62990";                  |          |   |   |   |                                                                         |
| chr7 Cufflinks exon29724389                             | 29725437 | . | - | . | gene_id "XLOC_050222"; transcript_id "TCONS_00082830"; exon_number "3"; |
| oId "CUFF.87001.1"; tss_id "TSS62990";                  |          |   |   |   |                                                                         |
| chr7 Cufflinks exon30754790                             | 30757732 | . | - | . | gene_id "XLOC_050253"; transcript_id "TCONS_00082872"; exon_number "1"; |
| oId "CUFF.87164.2"; tss_id "TSS63026";                  |          |   |   |   |                                                                         |
| chr7 Cufflinks exon30759450                             | 30759540 | . | - | . | gene_id "XLOC_050253"; transcript_id "TCONS_00082872"; exon_number "2"; |
| oId "CUFF.87164.2"; tss_id "TSS63026";                  |          |   |   |   |                                                                         |
| chr7 Cufflinks exon30760283                             | 30760484 | . | - | . | gene_id "XLOC_050253"; transcript_id "TCONS_00082872"; exon_number "3"; |
| oId "CUFF.87164.2"; tss_id "TSS63026";                  |          |   |   |   |                                                                         |
| chr7 Cufflinks exon30766796                             | 30766856 | . | - | . | gene_id "XLOC_050253"; transcript_id "TCONS_00082872"; exon_number "4"; |
| oId "CUFF.87164.2"; tss_id "TSS63026";                  |          |   |   |   |                                                                         |
| chr7 Cufflinks exon30764321                             | 30764443 | . | - | . | gene_id "XLOC_050253"; transcript_id "TCONS_00082873"; exon_number "1"; |
| oId "CUFF.87164.3"; tss_id "TSS63026";                  |          |   |   |   |                                                                         |
| chr7 Cufflinks exon30766796                             | 30766935 | . | - | . | gene_id "XLOC_050253"; transcript_id "TCONS_00082873"; exon_number "2"; |
| oId "CUFF.87164.3"; tss_id "TSS63026";                  |          |   |   |   |                                                                         |
| chr7 Cufflinks exon35791531                             | 35794805 | . | - | . | gene_id "XLOC_050297"; transcript_id "TCONS_00082933"; exon_number "1"; |
| oId "CUFF.87317.2"; tss_id "TSS63076";                  |          |   |   |   |                                                                         |
| chr7 Cufflinks exon35795343                             | 35795427 | . | - | . | gene_id "XLOC_050297"; transcript_id "TCONS_00082933"; exon_number "2"; |
| oId "CUFF.87317.2"; tss_id "TSS63076";                  |          |   |   |   |                                                                         |
| chr7 Cufflinks exon35796697                             | 35797069 | . | - | . | gene_id "XLOC_050297"; transcript_id "TCONS_00082933"; exon_number "3"; |
| oId "CUFF.87317.2"; tss_id "TSS63076";                  |          |   |   |   |                                                                         |
| chr7 Cufflinks exon35791531                             | 35794805 | . | - | . | gene_id "XLOC_050297"; transcript_id "TCONS_00082935"; exon_number "1"; |
| oId "CUFF.87317.4"; tss_id "TSS63077";                  |          |   |   |   |                                                                         |
| chr7 Cufflinks exon35797789                             | 35797883 | . | - | . | gene_id "XLOC_050297"; transcript_id "TCONS_00082935"; exon_number "2"; |
| oId "CUFF.87317.4"; tss_id "TSS63077";                  |          |   |   |   |                                                                         |
| chr7 Cufflinks exon35820819                             | 35820955 | . | - | . | gene_id "XLOC_050297"; transcript_id "TCONS_00082935"; exon_number "3"; |
| oId "CUFF.87317.4"; tss_id "TSS63077";                  |          |   |   |   |                                                                         |
| chr7 Cufflinks exon 35833516                            | 35833632 | . | - | . | gene_id "XLOC_050297"; transcript_id "TCONS_00082935"; exon_number      |
| "4"; oId "CUFF.87317.4"; tss_id "TSS63077";             |          |   |   |   |                                                                         |
| chr7 Cufflinks exon 35840100                            | 35840235 | . | - | . | gene_id "XLOC_050297"; transcript_id "TCONS_00082935";                  |
| exon_number "5"; oId "CUFF.87317.4"; tss_id "TSS63077"; |          |   |   |   |                                                                         |
| chr7 Cufflinks exon 35791531                            | 35794805 | . | - | . | gene_id "XLOC_050297"; transcript_id "TCONS_00082934";                  |
| exon_number "1"; oId "CUFF.87317.3"; tss_id "TSS63077"; |          |   |   |   |                                                                         |
| chr7 Cufflinks exon 35795343                            | 35795427 | . | - | . | gene_id "XLOC_050297"; transcript_id "TCONS_00082934";                  |
| exon_number "2"; oId "CUFF.87317.3"; tss_id "TSS63077"; |          |   |   |   |                                                                         |
| chr7 Cufflinks exon 35797789                            | 35797883 | . | - | . | gene_id "XLOC_050297"; transcript_id "TCONS_00082934";                  |
| exon_number "3"; oId "CUFF.87317.3"; tss_id "TSS63077"; |          |   |   |   |                                                                         |
| chr7 Cufflinks exon 35820819                            | 35820955 | . | - | . | gene_id "XLOC_050297"; transcript_id "TCONS_00082934";                  |
| exon_number "4"; oId "CUFF.87317.3"; tss_id "TSS63077"; |          |   |   |   |                                                                         |
| chr7 Cufflinks exon 35833516                            | 35833632 | . | - | . | gene_id "XLOC_050297"; transcript_id "TCONS_00082934";                  |
| exon_number "5"; oId "CUFF.87317.3"; tss_id "TSS63077"; |          |   |   |   |                                                                         |
| chr7 Cufflinks exon 35840096                            | 35840235 | . | - | . | gene_id "XLOC_050297"; transcript_id "TCONS_00082934";                  |

exon\_number "6"; oId "CUFF.87317.3"; tss\_id "TSS63077";  
chr7 Cufflinks exon 35791531 35794805 . - . gene\_id "XLOC\_050297"; transcript\_id "TCONS\_00082936";  
exon\_number "1"; oId "CUFF.87317.1"; tss\_id "TSS63078";  
chr7 Cufflinks exon 35795343 35795427 . - . gene\_id "XLOC\_050297"; transcript\_id "TCONS\_00082936";  
exon\_number "2"; oId "CUFF.87317.1"; tss\_id "TSS63078";  
chr7 Cufflinks exon 35797789 35797883 . - . gene\_id "XLOC\_050297"; transcript\_id "TCONS\_00082936";  
exon\_number "3"; oId "CUFF.87317.1"; tss\_id "TSS63078";  
chr7 Cufflinks exon 35820819 35820955 . - . gene\_id "XLOC\_050297"; transcript\_id "TCONS\_00082936";  
exon\_number "4"; oId "CUFF.87317.1"; tss\_id "TSS63078";  
chr7 Cufflinks exon 35833516 35833632 . - . gene\_id "XLOC\_050297"; transcript\_id "TCONS\_00082936";  
exon\_number "5"; oId "CUFF.87317.1"; tss\_id "TSS63078";  
chr7 Cufflinks exon 35840100 35840549 . - . gene\_id "XLOC\_050297"; transcript\_id "TCONS\_00082936";  
exon\_number "6"; oId "CUFF.87317.1"; tss\_id "TSS63078";  
chr7 Cufflinks exon 45022623 45023645 . - . gene\_id "XLOC\_050401"; transcript\_id "TCONS\_00083099";  
exon\_number "1"; oId "CUFF.87654.6"; tss\_id "TSS63209";  
chr7 Cufflinks exon 45023956 45025109 . - . gene\_id "XLOC\_050401"; transcript\_id "TCONS\_00083099";  
exon\_number "2"; oId "CUFF.87654.6"; tss\_id "TSS63209";  
chr7 Cufflinks exon 45022623 45022921 . - . gene\_id "XLOC\_050401"; transcript\_id "TCONS\_00083100";  
exon\_number "1"; oId "CUFF.87654.5"; tss\_id "TSS63210";  
chr7 Cufflinks exon 45023421 45025313 . - . gene\_id "XLOC\_050401"; transcript\_id "TCONS\_00083100";  
exon\_number "2"; oId "CUFF.87654.5"; tss\_id "TSS63210";  
chr7 Cufflinks exon 45022623 45022921 . - . gene\_id "XLOC\_050401"; transcript\_id "TCONS\_00083101";  
exon\_number "1"; oId "CUFF.87654.4"; tss\_id "TSS63211";  
chr7 Cufflinks exon 45023421 45023645 . - . gene\_id "XLOC\_050401"; transcript\_id "TCONS\_00083101";  
exon\_number "2"; oId "CUFF.87654.4"; tss\_id "TSS63211";  
chr7 Cufflinks exon 45023956 45024025 . - . gene\_id "XLOC\_050401"; transcript\_id "TCONS\_00083101";  
exon\_number "3"; oId "CUFF.87654.4"; tss\_id "TSS63211";  
chr7 Cufflinks exon 45025620 45025696 . - . gene\_id "XLOC\_050401"; transcript\_id "TCONS\_00083101";  
exon\_number "4"; oId "CUFF.87654.4"; tss\_id "TSS63211";  
chr7 Cufflinks exon 45026124 45026259 . - . gene\_id "XLOC\_050401"; transcript\_id "TCONS\_00083101";  
exon\_number "5"; oId "CUFF.87654.4"; tss\_id "TSS63211";  
chr7 Cufflinks exon 45022623 45023645 . - . gene\_id "XLOC\_050401"; transcript\_id "TCONS\_00083102";  
exon\_number "1"; oId "CUFF.87654.1"; tss\_id "TSS63212";  
chr7 Cufflinks exon 45025620 45025696 . - . gene\_id "XLOC\_050401"; transcript\_id "TCONS\_00083102";  
exon\_number "2"; oId "CUFF.87654.1"; tss\_id "TSS63212";  
chr7 Cufflinks exon 45026124 45026655 . - . gene\_id "XLOC\_050401"; transcript\_id "TCONS\_00083102";  
exon\_number "3"; oId "CUFF.87654.1"; tss\_id "TSS63212";  
chr7 Cufflinks exon 45022623 45023654 . - . gene\_id "XLOC\_050401"; transcript\_id "TCONS\_00083104";  
exon\_number "1"; oId "CUFF.87654.3"; tss\_id "TSS63212";  
chr7 Cufflinks exon 45023965 45024026 . - . gene\_id "XLOC\_050401"; transcript\_id "TCONS\_00083104";  
exon\_number "2"; oId "CUFF.87654.3"; tss\_id "TSS63212";  
chr7 Cufflinks exon 45025621 45025696 . - . gene\_id "XLOC\_050401"; transcript\_id "TCONS\_00083104";  
exon\_number "3"; oId "CUFF.87654.3"; tss\_id "TSS63212";

chr7 Cufflinks exon 45026124 45026657 . - . gene\_id "XLOC\_050401"; transcript\_id "TCONS\_00083104";  
exon\_number "4"; oId "CUFF.87654.3"; tss\_id "TSS63212";

chr7 Cufflinks exon 45022623 45022921 . - . gene\_id "XLOC\_050401"; transcript\_id "TCONS\_00083103";  
exon\_number "1"; oId "CUFF.87654.2"; tss\_id "TSS63212";

chr7 Cufflinks exon 45023421 45024025 . - . gene\_id "XLOC\_050401"; transcript\_id "TCONS\_00083103";  
exon\_number "2"; oId "CUFF.87654.2"; tss\_id "TSS63212";

chr7 Cufflinks exon 45025620 45025696 . - . gene\_id "XLOC\_050401"; transcript\_id "TCONS\_00083103";  
exon\_number "3"; oId "CUFF.87654.2"; tss\_id "TSS63212";

chr7 Cufflinks exon 45026124 45026657 . - . gene\_id "XLOC\_050401"; transcript\_id "TCONS\_00083103";  
exon\_number "4"; oId "CUFF.87654.2"; tss\_id "TSS63212";

chr7 Cufflinks exon 47673533 47676238 . - . gene\_id "XLOC\_050410"; transcript\_id "TCONS\_00083128";  
exon\_number "1"; oId "CUFF.87694.3"; tss\_id "TSS63224";

chr7 Cufflinks exon 47680220 47680288 . - . gene\_id "XLOC\_050410"; transcript\_id "TCONS\_00083128";  
exon\_number "2"; oId "CUFF.87694.3"; tss\_id "TSS63224";

chr7 Cufflinks exon 47681660 47681736 . - . gene\_id "XLOC\_050410"; transcript\_id "TCONS\_00083128";  
exon\_number "3"; oId "CUFF.87694.3"; tss\_id "TSS63224";

chr7 Cufflinks exon 47693405 47693503 . - . gene\_id "XLOC\_050410"; transcript\_id "TCONS\_00083128";  
exon\_number "4"; oId "CUFF.87694.3"; tss\_id "TSS63224";

chr7 Cufflinks exon 47673533 47676238 . - . gene\_id "XLOC\_050410"; transcript\_id "TCONS\_00083127";  
exon\_number "1"; oId "CUFF.87694.2"; tss\_id "TSS63224";

chr7 Cufflinks exon 47681660 47681736 . - . gene\_id "XLOC\_050410"; transcript\_id "TCONS\_00083127";  
exon\_number "2"; oId "CUFF.87694.2"; tss\_id "TSS63224";

chr7 Cufflinks exon 47693405 47693503 . - . gene\_id "XLOC\_050410"; transcript\_id "TCONS\_00083127";  
exon\_number "3"; oId "CUFF.87694.2"; tss\_id "TSS63224";

chr7 Cufflinks exon 47673533 47676238 . - . gene\_id "XLOC\_050410"; transcript\_id "TCONS\_00083126";  
exon\_number "1"; oId "CUFF.87694.1"; tss\_id "TSS63224";

chr7 Cufflinks exon 47693405 47693503 . - . gene\_id "XLOC\_050410"; transcript\_id "TCONS\_00083126";  
exon\_number "2"; oId "CUFF.87694.1"; tss\_id "TSS63224";

chr7 Cufflinks exon 65887956 65888865 . - . gene\_id "XLOC\_050496"; transcript\_id "TCONS\_00083288";  
exon\_number "1"; oId "CUFF.88092.15"; tss\_id "TSS63342";

chr7 Cufflinks exon 65892936 65893025 . - . gene\_id "XLOC\_050496"; transcript\_id "TCONS\_00083288";  
exon\_number "2"; oId "CUFF.88092.15"; tss\_id "TSS63342";

chr7 Cufflinks exon 65894666 65894744 . - . gene\_id "XLOC\_050496"; transcript\_id "TCONS\_00083288";  
exon\_number "3"; oId "CUFF.88092.15"; tss\_id "TSS63342";

chr7 Cufflinks exon 65894871 65895004 . - . gene\_id "XLOC\_050496"; transcript\_id "TCONS\_00083288";  
exon\_number "4"; oId "CUFF.88092.15"; tss\_id "TSS63342";

chr7 Cufflinks exon 65904122 65904291 . - . gene\_id "XLOC\_050496"; transcript\_id "TCONS\_00083288";  
exon\_number "5"; oId "CUFF.88092.15"; tss\_id "TSS63342";

chr7 Cufflinks exon 65915058 65915223 . - . gene\_id "XLOC\_050496"; transcript\_id "TCONS\_00083288";  
exon\_number "6"; oId "CUFF.88092.15"; tss\_id "TSS63342";

chr7 Cufflinks exon 65941246 65941314 . - . gene\_id "XLOC\_050496"; transcript\_id "TCONS\_00083288";  
exon\_number "7"; oId "CUFF.88092.15"; tss\_id "TSS63342";

chr7 Cufflinks exon 65943996 65944085 . - . gene\_id "XLOC\_050496"; transcript\_id "TCONS\_00083288";

exon\_number "8"; oId "CUFF.88092.15"; tss\_id "TSS63342";  
chr7 Cufflinks exon 65945383 65945435 . - . gene\_id "XLOC\_050496"; transcript\_id "TCONS\_00083288";  
exon\_number "9"; oId "CUFF.88092.15"; tss\_id "TSS63342";  
chr7 Cufflinks exon 65946528 65946586 . - . gene\_id "XLOC\_050496"; transcript\_id "TCONS\_00083288";  
exon\_number "10"; oId "CUFF.88092.15"; tss\_id "TSS63342";  
chr7 Cufflinks exon 65952936 65953025 . - . gene\_id "XLOC\_050496"; transcript\_id "TCONS\_00083288";  
exon\_number "11"; oId "CUFF.88092.15"; tss\_id "TSS63342";  
chr7 Cufflinks exon 65954925 65955094 . - . gene\_id "XLOC\_050496"; transcript\_id "TCONS\_00083288";  
exon\_number "12"; oId "CUFF.88092.15"; tss\_id "TSS63342";  
chr7 Cufflinks exon 65956018 65956226 . - . gene\_id "XLOC\_050496"; transcript\_id "TCONS\_00083288";  
exon\_number "13"; oId "CUFF.88092.15"; tss\_id "TSS63342";  
chr7 Cufflinks exon 65956337 65957326 . - . gene\_id "XLOC\_050496"; transcript\_id "TCONS\_00083288";  
exon\_number "14"; oId "CUFF.88092.15"; tss\_id "TSS63342";  
chr7 Cufflinks exon 65958203 65958578 . - . gene\_id "XLOC\_050496"; transcript\_id "TCONS\_00083288";  
exon\_number "15"; oId "CUFF.88092.15"; tss\_id "TSS63342";  
chr7 Cufflinks exon 69059792 69061419 . - . gene\_id "XLOC\_050521"; transcript\_id "TCONS\_00083321";  
exon\_number "1"; oId "CUFF.88264.4"; tss\_id "TSS63368";  
chr7 Cufflinks exon 69062220 69062481 . - . gene\_id "XLOC\_050521"; transcript\_id "TCONS\_00083321";  
exon\_number "2"; oId "CUFF.88264.4"; tss\_id "TSS63368";  
chr7 Cufflinks exon 69059792 69061419 . - . gene\_id "XLOC\_050521"; transcript\_id "TCONS\_00083322";  
exon\_number "1"; oId "CUFF.88264.1"; tss\_id "TSS63369";  
chr7 Cufflinks exon 69061641 69063024 . - . gene\_id "XLOC\_050521"; transcript\_id "TCONS\_00083322";  
exon\_number "2"; oId "CUFF.88264.1"; tss\_id "TSS63369";  
chr7 Cufflinks exon 69059792 69061419 . - . gene\_id "XLOC\_050521"; transcript\_id "TCONS\_00083323";  
exon\_number "1"; oId "CUFF.88264.2"; tss\_id "TSS63369";  
chr7 Cufflinks exon 69061641 69061677 . - . gene\_id "XLOC\_050521"; transcript\_id "TCONS\_00083323";  
exon\_number "2"; oId "CUFF.88264.2"; tss\_id "TSS63369";  
chr7 Cufflinks exon 69062033 69063026 . - . gene\_id "XLOC\_050521"; transcript\_id "TCONS\_00083323";  
exon\_number "3"; oId "CUFF.88264.2"; tss\_id "TSS63369";  
chr7 Cufflinks exon 69059792 69061419 . - . gene\_id "XLOC\_050521"; transcript\_id "TCONS\_00083324";  
exon\_number "1"; oId "CUFF.88264.3"; tss\_id "TSS63369";  
chr7 Cufflinks exon 69061641 69061677 . - . gene\_id "XLOC\_050521"; transcript\_id "TCONS\_00083324";  
exon\_number "2"; oId "CUFF.88264.3"; tss\_id "TSS63369";  
chr7 Cufflinks exon 69062220 69063033 . - . gene\_id "XLOC\_050521"; transcript\_id "TCONS\_00083324";  
exon\_number "3"; oId "CUFF.88264.3"; tss\_id "TSS63369";  
chr7 Cufflinks exon 75120043 75120900 . - . gene\_id "XLOC\_050570"; transcript\_id "TCONS\_00083437";  
exon\_number "1"; oId "CUFF.88574.1"; tss\_id "TSS63443";  
chr7 Cufflinks exon 75136689 75136845 . - . gene\_id "XLOC\_050570"; transcript\_id "TCONS\_00083437";  
exon\_number "2"; oId "CUFF.88574.1"; tss\_id "TSS63443";  
chr7 Cufflinks exon 77313168 77313568 . - . gene\_id "XLOC\_050609"; transcript\_id "TCONS\_00083511";  
exon\_number "1"; oId "CUFF.88762.1"; tss\_id "TSS63496";  
chr7 Cufflinks exon 77314519 77314645 . - . gene\_id "XLOC\_050609"; transcript\_id "TCONS\_00083511";  
exon\_number "2"; oId "CUFF.88762.1"; tss\_id "TSS63496";

chr7 Cufflinks exon 77325213 77326662 . - . gene\_id "XLOC\_050609"; transcript\_id "TCONS\_00083511";  
exon\_number "3"; oId "CUFF.88762.1"; tss\_id "TSS63496";

chr7 Cufflinks exon 96250712 96251955 . - . gene\_id "XLOC\_050704"; transcript\_id "TCONS\_00083668";  
exon\_number "1"; oId "CUFF.89136.2"; tss\_id "TSS63612";

chr7 Cufflinks exon 96275036 96275248 . - . gene\_id "XLOC\_050704"; transcript\_id "TCONS\_00083668";  
exon\_number "2"; oId "CUFF.89136.2"; tss\_id "TSS63612";

chr7 Cufflinks exon 96276741 96276852 . - . gene\_id "XLOC\_050704"; transcript\_id "TCONS\_00083668";  
exon\_number "3"; oId "CUFF.89136.2"; tss\_id "TSS63612";

chr7 Cufflinks exon 96283057 96283150 . - . gene\_id "XLOC\_050704"; transcript\_id "TCONS\_00083668";  
exon\_number "4"; oId "CUFF.89136.2"; tss\_id "TSS63612";

chr7 Cufflinks exon 96285769 96285897 . - . gene\_id "XLOC\_050704"; transcript\_id "TCONS\_00083668";  
exon\_number "5"; oId "CUFF.89136.2"; tss\_id "TSS63612";

chr7 Cufflinks exon 96293515 96293742 . - . gene\_id "XLOC\_050704"; transcript\_id "TCONS\_00083668";  
exon\_number "6"; oId "CUFF.89136.2"; tss\_id "TSS63612";

chr7 Cufflinks exon 96250712 96251955 . - . gene\_id "XLOC\_050704"; transcript\_id "TCONS\_00083669";  
exon\_number "1"; oId "CUFF.89136.3"; tss\_id "TSS63613";

chr7 Cufflinks exon 96275036 96275248 . - . gene\_id "XLOC\_050704"; transcript\_id "TCONS\_00083669";  
exon\_number "2"; oId "CUFF.89136.3"; tss\_id "TSS63613";

chr7 Cufflinks exon 96276741 96276852 . - . gene\_id "XLOC\_050704"; transcript\_id "TCONS\_00083669";  
exon\_number "3"; oId "CUFF.89136.3"; tss\_id "TSS63613";

chr7 Cufflinks exon 96285769 96285897 . - . gene\_id "XLOC\_050704"; transcript\_id "TCONS\_00083669";  
exon\_number "4"; oId "CUFF.89136.3"; tss\_id "TSS63613";

chr7 Cufflinks exon 96293515 96298913 . - . gene\_id "XLOC\_050704"; transcript\_id "TCONS\_00083669";  
exon\_number "5"; oId "CUFF.89136.3"; tss\_id "TSS63613";

chr7 Cufflinks exon 96274260 96275244 . - . gene\_id "XLOC\_050704"; transcript\_id "TCONS\_00083671";  
exon\_number "1"; oId "CUFF.89136.5"; tss\_id "TSS63615";

chr7 Cufflinks exon 96283057 96283100 . - . gene\_id "XLOC\_050704"; transcript\_id "TCONS\_00083671";  
exon\_number "2"; oId "CUFF.89136.5"; tss\_id "TSS63615";

chr7 Cufflinks exon 96274260 96275244 . - . gene\_id "XLOC\_050704"; transcript\_id "TCONS\_00083672";  
exon\_number "1"; oId "CUFF.89136.6"; tss\_id "TSS63616";

chr7 Cufflinks exon 96302034 96302053 . - . gene\_id "XLOC\_050704"; transcript\_id "TCONS\_00083672";  
exon\_number "2"; oId "CUFF.89136.6"; tss\_id "TSS63616";

chr7 Cufflinks exon 96282123 96282527 . - . gene\_id "XLOC\_050704"; transcript\_id "TCONS\_00083675";  
exon\_number "1"; oId "CUFF.89136.8"; tss\_id "TSS63614";

chr7 Cufflinks exon 96283057 96283150 . - . gene\_id "XLOC\_050704"; transcript\_id "TCONS\_00083675";  
exon\_number "2"; oId "CUFF.89136.8"; tss\_id "TSS63614";

chr7 Cufflinks exon 96285769 96285897 . - . gene\_id "XLOC\_050704"; transcript\_id "TCONS\_00083675";  
exon\_number "3"; oId "CUFF.89136.8"; tss\_id "TSS63614";

chr7 Cufflinks exon 96293515 96296284 . - . gene\_id "XLOC\_050704"; transcript\_id "TCONS\_00083675";  
exon\_number "4"; oId "CUFF.89136.8"; tss\_id "TSS63614";

chr7 Cufflinks exon 96298116 96300351 . - . gene\_id "XLOC\_050704"; transcript\_id "TCONS\_00083675";  
exon\_number "5"; oId "CUFF.89136.8"; tss\_id "TSS63614";

chr7 Cufflinks exon 96302034 96302120 . - . gene\_id "XLOC\_050704"; transcript\_id "TCONS\_00083675";

exon\_number "6"; oId "CUFF.89136.8"; tss\_id "TSS63614";  
 chr7 Cufflinks exon 96302212 96302231 . - . gene\_id "XLOC\_050704"; transcript\_id "TCONS\_00083675";  
 exon\_number "7"; oId "CUFF.89136.8"; tss\_id "TSS63614";  
 chr7 Cufflinks exon 96584455 96598430 . - . gene\_id "XLOC\_050712"; transcript\_id "TCONS\_00083684";  
 exon\_number "1"; oId "CUFF.89145.3"; tss\_id "TSS63625";  
 chr7 Cufflinks exon 96607659 96608903 . - . gene\_id "XLOC\_050712"; transcript\_id "TCONS\_00083684";  
 exon\_number "2"; oId "CUFF.89145.3"; tss\_id "TSS63625";  
 chr7 Cufflinks exon96635671 96635718 . - . gene\_id "XLOC\_050712"; transcript\_id "TCONS\_00083684"; exon\_number "3";  
 oId "CUFF.89145.3"; tss\_id "TSS63625";  
 chr7 Cufflinks exon96584455 96598430 . - . gene\_id "XLOC\_050712"; transcript\_id "TCONS\_00083686"; exon\_number "1";  
 oId "CUFF.89145.4"; tss\_id "TSS63626";  
 chr7 Cufflinks exon96607659 96608903 . - . gene\_id "XLOC\_050712"; transcript\_id "TCONS\_00083686"; exon\_number "2";  
 oId "CUFF.89145.4"; tss\_id "TSS63626";  
 chr7 Cufflinks exon96643237 96643377 . - . gene\_id "XLOC\_050712"; transcript\_id "TCONS\_00083686"; exon\_number "3";  
 oId "CUFF.89145.4"; tss\_id "TSS63626";  
 chr7 Cufflinks exon96584455 96598430 . - . gene\_id "XLOC\_050712"; transcript\_id "TCONS\_00083685"; exon\_number "1";  
 oId "CUFF.89145.2"; tss\_id "TSS63626";  
 chr7 Cufflinks exon96643237 96643377 . - . gene\_id "XLOC\_050712"; transcript\_id "TCONS\_00083685"; exon\_number "2";  
 oId "CUFF.89145.2"; tss\_id "TSS63626";  
 chr7 Cufflinks exon96602892 96608903 . - . gene\_id "XLOC\_050712"; transcript\_id "TCONS\_00083688"; exon\_number "1";  
 oId "CUFF.89145.5"; tss\_id "TSS63627";  
 chr7 Cufflinks exon96641137 96641342 . - . gene\_id "XLOC\_050712"; transcript\_id "TCONS\_00083688"; exon\_number "2";  
 oId "CUFF.89145.5"; tss\_id "TSS63627";  
 chr7 Cufflinks exon98851416 98851868 . - . gene\_id "XLOC\_050733"; transcript\_id "TCONS\_00083719"; exon\_number "1";  
 oId "CUFF.89216.1"; tss\_id "TSS63651";  
 chr7 Cufflinks exon98888500 98888599 . - . gene\_id "XLOC\_050733"; transcript\_id "TCONS\_00083719"; exon\_number "2";  
 oId "CUFF.89216.1"; tss\_id "TSS63651";  
 chr7 Cufflinks exon98916860 98917067 . - . gene\_id "XLOC\_050733"; transcript\_id "TCONS\_00083719"; exon\_number "3";  
 oId "CUFF.89216.1"; tss\_id "TSS63651";  
 chr7 Cufflinks exon98923137 98923424 . - . gene\_id "XLOC\_050733"; transcript\_id "TCONS\_00083719"; exon\_number "4";  
 oId "CUFF.89216.1"; tss\_id "TSS63651";  
 chr7 Cufflinks exon98914986 98915652 . - . gene\_id "XLOC\_050733"; transcript\_id "TCONS\_00083724"; exon\_number "1";  
 oId "CUFF.89216.5"; tss\_id "TSS63651";  
 chr7 Cufflinks exon98916860 98916932 . - . gene\_id "XLOC\_050733"; transcript\_id "TCONS\_00083724"; exon\_number "2";  
 oId "CUFF.89216.5"; tss\_id "TSS63651";  
 chr7 Cufflinks exon98917017 98917074 . - . gene\_id "XLOC\_050733"; transcript\_id "TCONS\_00083724"; exon\_number "3";  
 oId "CUFF.89216.5"; tss\_id "TSS63651";  
 chr7 Cufflinks exon98923144 98923419 . - . gene\_id "XLOC\_050733"; transcript\_id "TCONS\_00083724"; exon\_number "4";  
 oId "CUFF.89216.5"; tss\_id "TSS63651";  
 chr7 Cufflinks exon98916602 98917067 . - . gene\_id "XLOC\_050733"; transcript\_id "TCONS\_00083725"; exon\_number "1";  
 oId "CUFF.89216.6"; tss\_id "TSS63651";  
 chr7 Cufflinks exon98923137 98923424 . - . gene\_id "XLOC\_050733"; transcript\_id "TCONS\_00083725"; exon\_number "2";  
 oId "CUFF.89216.6"; tss\_id "TSS63651";

|                                        |           |   |   |   |                                                                         |
|----------------------------------------|-----------|---|---|---|-------------------------------------------------------------------------|
| chr7 Cufflinks exon100434980           | 100435201 | . | - | . | gene_id "XLOC_050786"; transcript_id "TCONS_00083807"; exon_number "1"; |
| oId "CUFF.89495.1"; tss_id "TSS63713"; |           |   |   |   |                                                                         |
| chr7 Cufflinks exon100450087           | 100450112 | . | - | . | gene_id "XLOC_050786"; transcript_id "TCONS_00083807"; exon_number "2"; |
| oId "CUFF.89495.1"; tss_id "TSS63713"; |           |   |   |   |                                                                         |
| chr7 Cufflinks exon100893668           | 100894007 | . | - | . | gene_id "XLOC_050798"; transcript_id "TCONS_00083824"; exon_number "1"; |
| oId "CUFF.89544.1"; tss_id "TSS63728"; |           |   |   |   |                                                                         |
| chr7 Cufflinks exon100894636           | 100895136 | . | - | . | gene_id "XLOC_050798"; transcript_id "TCONS_00083824"; exon_number "2"; |
| oId "CUFF.89544.1"; tss_id "TSS63728"; |           |   |   |   |                                                                         |
| chr7 Cufflinks exon102171768           | 102173424 | . | - | . | gene_id "XLOC_050811"; transcript_id "TCONS_00083842"; exon_number "1"; |
| oId "CUFF.89603.1"; tss_id "TSS63744"; |           |   |   |   |                                                                         |
| chr7 Cufflinks exon102272534           | 102272686 | . | - | . | gene_id "XLOC_050811"; transcript_id "TCONS_00083842"; exon_number "2"; |
| oId "CUFF.89603.1"; tss_id "TSS63744"; |           |   |   |   |                                                                         |
| chr7 Cufflinks exon104616604           | 104618677 | . | - | . | gene_id "XLOC_050847"; transcript_id "TCONS_00083899"; exon_number "1"; |
| oId "CUFF.89799.1"; tss_id "TSS63786"; |           |   |   |   |                                                                         |
| chr7 Cufflinks exon104618808           | 104620317 | . | - | . | gene_id "XLOC_050847"; transcript_id "TCONS_00083899"; exon_number "2"; |
| oId "CUFF.89799.1"; tss_id "TSS63786"; |           |   |   |   |                                                                         |
| chr7 Cufflinks exon104622194           | 104623138 | . | - | . | gene_id "XLOC_050848"; transcript_id "TCONS_00083901"; exon_number "1"; |
| oId "CUFF.89800.1"; tss_id "TSS63788"; |           |   |   |   |                                                                         |
| chr7 Cufflinks exon104624154           | 104637896 | . | - | . | gene_id "XLOC_050848"; transcript_id "TCONS_00083901"; exon_number "2"; |
| oId "CUFF.89800.1"; tss_id "TSS63788"; |           |   |   |   |                                                                         |
| chr7 Cufflinks exon105170477           | 105170904 | . | - | . | gene_id "XLOC_050858"; transcript_id "TCONS_00083913"; exon_number "1"; |
| oId "CUFF.89819.1"; tss_id "TSS63799"; |           |   |   |   |                                                                         |
| chr7 Cufflinks exon105171944           | 105172098 | . | - | . | gene_id "XLOC_050858"; transcript_id "TCONS_00083913"; exon_number "2"; |
| oId "CUFF.89819.1"; tss_id "TSS63799"; |           |   |   |   |                                                                         |
| chr7 Cufflinks exon105172469           | 105172522 | . | - | . | gene_id "XLOC_050858"; transcript_id "TCONS_00083913"; exon_number "3"; |
| oId "CUFF.89819.1"; tss_id "TSS63799"; |           |   |   |   |                                                                         |
| chr7 Cufflinks exon105695675           | 105698211 | . | - | . | gene_id "XLOC_050867"; transcript_id "TCONS_00083932"; exon_number "1"; |
| oId "CUFF.89848.1"; tss_id "TSS63810"; |           |   |   |   |                                                                         |
| chr7 Cufflinks exon105711745           | 105713771 | . | - | . | gene_id "XLOC_050867"; transcript_id "TCONS_00083932"; exon_number "2"; |
| oId "CUFF.89848.1"; tss_id "TSS63810"; |           |   |   |   |                                                                         |
| chr7 Cufflinks exon105706531           | 105710290 | . | - | . | gene_id "XLOC_050867"; transcript_id "TCONS_00083935"; exon_number "1"; |
| oId "CUFF.89848.2"; tss_id "TSS63810"; |           |   |   |   |                                                                         |
| chr7 Cufflinks exon105711745           | 105713771 | . | - | . | gene_id "XLOC_050867"; transcript_id "TCONS_00083935"; exon_number "2"; |
| oId "CUFF.89848.2"; tss_id "TSS63810"; |           |   |   |   |                                                                         |
| chr7 Cufflinks exon110071260           | 110072367 | . | - | . | gene_id "XLOC_050894"; transcript_id "TCONS_00083974"; exon_number "1"; |
| oId "CUFF.89967.3"; tss_id "TSS63842"; |           |   |   |   |                                                                         |
| chr7 Cufflinks exon110072868           | 110072963 | . | - | . | gene_id "XLOC_050894"; transcript_id "TCONS_00083974"; exon_number "2"; |
| oId "CUFF.89967.3"; tss_id "TSS63842"; |           |   |   |   |                                                                         |
| chr7 Cufflinks exon110151117           | 110151171 | . | - | . | gene_id "XLOC_050894"; transcript_id "TCONS_00083974"; exon_number "3"; |
| oId "CUFF.89967.3"; tss_id "TSS63842"; |           |   |   |   |                                                                         |
| chr7 Cufflinks exon110165513           | 110165618 | . | - | . | gene_id "XLOC_050894"; transcript_id "TCONS_00083974"; exon_number "4"; |
| oId "CUFF.89967.3"; tss_id "TSS63842"; |           |   |   |   |                                                                         |
| chr7 Cufflinks exon110174646           | 110174865 | . | - | . | gene_id "XLOC_050894"; transcript_id "TCONS_00083974"; exon_number "5"; |

oId "CUFF.89967.3"; tss\_id "TSS63842";  
chr7 Cufflinks exon110071260 110072349 . - . gene\_id "XLOC\_050894"; transcript\_id "TCONS\_00083973"; exon\_number "1";  
oId "CUFF.89967.2"; tss\_id "TSS63842";  
chr7 Cufflinks exon110072868 110072963 . - . gene\_id "XLOC\_050894"; transcript\_id "TCONS\_00083973"; exon\_number "2";  
oId "CUFF.89967.2"; tss\_id "TSS63842";  
chr7 Cufflinks exon110151117 110151171 . - . gene\_id "XLOC\_050894"; transcript\_id "TCONS\_00083973"; exon\_number "3";  
oId "CUFF.89967.2"; tss\_id "TSS63842";  
chr7 Cufflinks exon110165513 110165618 . - . gene\_id "XLOC\_050894"; transcript\_id "TCONS\_00083973"; exon\_number "4";  
oId "CUFF.89967.2"; tss\_id "TSS63842";  
chr7 Cufflinks exon110174646 110174865 . - . gene\_id "XLOC\_050894"; transcript\_id "TCONS\_00083973"; exon\_number "5";  
oId "CUFF.89967.2"; tss\_id "TSS63842";  
chr7 Cufflinks exon110091536 110091564 . - . gene\_id "XLOC\_050894"; transcript\_id "TCONS\_00083975"; exon\_number "1";  
oId "CUFF.89967.4"; tss\_id "TSS63842";  
chr7 Cufflinks exon110151117 110151171 . - . gene\_id "XLOC\_050894"; transcript\_id "TCONS\_00083975"; exon\_number "2";  
oId "CUFF.89967.4"; tss\_id "TSS63842";  
chr7 Cufflinks exon110165513 110165618 . - . gene\_id "XLOC\_050894"; transcript\_id "TCONS\_00083975"; exon\_number "3";  
oId "CUFF.89967.4"; tss\_id "TSS63842";  
chr7 Cufflinks exon110174646 110174865 . - . gene\_id "XLOC\_050894"; transcript\_id "TCONS\_00083975"; exon\_number "4";  
oId "CUFF.89967.4"; tss\_id "TSS63842";  
chr7 Cufflinks exon130562321 130562356 . - . gene\_id "XLOC\_051126"; transcript\_id "TCONS\_00084282"; exon\_number "1";  
oId "CUFF.90525.1"; tss\_id "TSS64102";  
chr7 Cufflinks exon130569076 130569155 . - . gene\_id "XLOC\_051126"; transcript\_id "TCONS\_00084282"; exon\_number "2";  
oId "CUFF.90525.1"; tss\_id "TSS64102";  
chr7 Cufflinks exon130596869 130596911 . - . gene\_id "XLOC\_051126"; transcript\_id "TCONS\_00084282"; exon\_number "3";  
oId "CUFF.90525.1"; tss\_id "TSS64102";  
chr7 Cufflinks exon130597710 130626617 . - . gene\_id "XLOC\_051126"; transcript\_id "TCONS\_00084282"; exon\_number "4";  
oId "CUFF.90525.1"; tss\_id "TSS64102";  
chr7 Cufflinks exon130630479 130630594 . - . gene\_id "XLOC\_051126"; transcript\_id "TCONS\_00084282"; exon\_number "5";  
oId "CUFF.90525.1"; tss\_id "TSS64102";  
chr7 Cufflinks exon130668812 130668868 . - . gene\_id "XLOC\_051126"; transcript\_id "TCONS\_00084282"; exon\_number "6";  
oId "CUFF.90525.1"; tss\_id "TSS64102";  
chr7 Cufflinks exon130792479 130793562 . - . gene\_id "XLOC\_051126"; transcript\_id "TCONS\_00084282"; exon\_number "7";  
oId "CUFF.90525.1"; tss\_id "TSS64102";  
chr7 Cufflinks exon130794496 130794809 . - . gene\_id "XLOC\_051126"; transcript\_id "TCONS\_00084282"; exon\_number "8";  
oId "CUFF.90525.1"; tss\_id "TSS64102";  
chr7 Cufflinks exon130565751 130567495 . - . gene\_id "XLOC\_051126"; transcript\_id "TCONS\_00084283"; exon\_number "1";  
oId "CUFF.90525.2"; tss\_id "TSS64103";  
chr7 Cufflinks exon130569076 130569155 . - . gene\_id "XLOC\_051126"; transcript\_id "TCONS\_00084283"; exon\_number "2";  
oId "CUFF.90525.2"; tss\_id "TSS64103";  
chr7 Cufflinks exon130596869 130596911 . - . gene\_id "XLOC\_051126"; transcript\_id "TCONS\_00084283"; exon\_number "3";  
oId "CUFF.90525.2"; tss\_id "TSS64103";  
chr7 Cufflinks exon130597710 130598069 . - . gene\_id "XLOC\_051126"; transcript\_id "TCONS\_00084283"; exon\_number "4";  
oId "CUFF.90525.2"; tss\_id "TSS64103";



|                                         |           |   |   |   |                                                                         |
|-----------------------------------------|-----------|---|---|---|-------------------------------------------------------------------------|
| chr7 Cufflinks exon130595738            | 130595920 | . | - | . | gene_id "XLOC_051126"; transcript_id "TCONS_00084285"; exon_number "1"; |
| oId "CUFF.90525.4"; tss_id "TSS64105";  |           |   |   |   |                                                                         |
| chr7 Cufflinks exon130596869            | 130596911 | . | - | . | gene_id "XLOC_051126"; transcript_id "TCONS_00084285"; exon_number "2"; |
| oId "CUFF.90525.4"; tss_id "TSS64105";  |           |   |   |   |                                                                         |
| chr7 Cufflinks exon130597710            | 130598303 | . | - | . | gene_id "XLOC_051126"; transcript_id "TCONS_00084285"; exon_number "3"; |
| oId "CUFF.90525.4"; tss_id "TSS64105";  |           |   |   |   |                                                                         |
| chr7 Cufflinks exon130628919            | 130629648 | . | - | . | gene_id "XLOC_051126"; transcript_id "TCONS_00084288"; exon_number "1"; |
| oId "CUFF.90525.7"; tss_id "TSS64106";  |           |   |   |   |                                                                         |
| chr7 Cufflinks exon130630479            | 130630594 | . | - | . | gene_id "XLOC_051126"; transcript_id "TCONS_00084288"; exon_number "2"; |
| oId "CUFF.90525.7"; tss_id "TSS64106";  |           |   |   |   |                                                                         |
| chr7 Cufflinks exon130645882            | 130646023 | . | - | . | gene_id "XLOC_051126"; transcript_id "TCONS_00084288"; exon_number "3"; |
| oId "CUFF.90525.7"; tss_id "TSS64106";  |           |   |   |   |                                                                         |
| chr7 Cufflinks exon130628919            | 130630594 | . | - | . | gene_id "XLOC_051126"; transcript_id "TCONS_00084289"; exon_number "1"; |
| oId "CUFF.90525.8"; tss_id "TSS64106";  |           |   |   |   |                                                                         |
| chr7 Cufflinks exon130645882            | 130646023 | . | - | . | gene_id "XLOC_051126"; transcript_id "TCONS_00084289"; exon_number "2"; |
| oId "CUFF.90525.8"; tss_id "TSS64106";  |           |   |   |   |                                                                         |
| chr7 Cufflinks exon130628919            | 130630594 | . | - | . | gene_id "XLOC_051126"; transcript_id "TCONS_00084287"; exon_number "1"; |
| oId "CUFF.90525.6"; tss_id "TSS64106";  |           |   |   |   |                                                                         |
| chr7 Cufflinks exon130644628            | 130644723 | . | - | . | gene_id "XLOC_051126"; transcript_id "TCONS_00084287"; exon_number "2"; |
| oId "CUFF.90525.6"; tss_id "TSS64106";  |           |   |   |   |                                                                         |
| chr7 Cufflinks exon130645882            | 130646023 | . | - | . | gene_id "XLOC_051126"; transcript_id "TCONS_00084287"; exon_number "3"; |
| oId "CUFF.90525.6"; tss_id "TSS64106";  |           |   |   |   |                                                                         |
| chr7 Cufflinks exon130628919            | 130630594 | . | - | . | gene_id "XLOC_051126"; transcript_id "TCONS_00084286"; exon_number "1"; |
| oId "CUFF.90525.5"; tss_id "TSS64106";  |           |   |   |   |                                                                         |
| chr7 Cufflinks exon130644628            | 130644729 | . | - | . | gene_id "XLOC_051126"; transcript_id "TCONS_00084286"; exon_number "2"; |
| oId "CUFF.90525.5"; tss_id "TSS64106";  |           |   |   |   |                                                                         |
| chr7 Cufflinks exon130645882            | 130646023 | . | - | . | gene_id "XLOC_051126"; transcript_id "TCONS_00084286"; exon_number "3"; |
| oId "CUFF.90525.5"; tss_id "TSS64106";  |           |   |   |   |                                                                         |
| chr7 Cufflinks exon130628919            | 130630594 | . | - | . | gene_id "XLOC_051126"; transcript_id "TCONS_00084290"; exon_number "1"; |
| oId "CUFF.90525.9"; tss_id "TSS64107";  |           |   |   |   |                                                                         |
| chr7 Cufflinks exon130668812            | 130668868 | . | - | . | gene_id "XLOC_051126"; transcript_id "TCONS_00084290"; exon_number "2"; |
| oId "CUFF.90525.9"; tss_id "TSS64107";  |           |   |   |   |                                                                         |
| chr7 Cufflinks exon130791304            | 130791376 | . | - | . | gene_id "XLOC_051126"; transcript_id "TCONS_00084290"; exon_number "3"; |
| oId "CUFF.90525.9"; tss_id "TSS64107";  |           |   |   |   |                                                                         |
| chr7 Cufflinks exon130791502            | 130791789 | . | - | . | gene_id "XLOC_051126"; transcript_id "TCONS_00084290"; exon_number "4"; |
| oId "CUFF.90525.9"; tss_id "TSS64107";  |           |   |   |   |                                                                         |
| chr7 Cufflinks exon130628919            | 130629648 | . | - | . | gene_id "XLOC_051126"; transcript_id "TCONS_00084293"; exon_number "1"; |
| oId "CUFF.90525.12"; tss_id "TSS64108"; |           |   |   |   |                                                                         |
| chr7 Cufflinks exon130630479            | 130630594 | . | - | . | gene_id "XLOC_051126"; transcript_id "TCONS_00084293"; exon_number "2"; |
| oId "CUFF.90525.12"; tss_id "TSS64108"; |           |   |   |   |                                                                         |
| chr7 Cufflinks exon130668812            | 130668868 | . | - | . | gene_id "XLOC_051126"; transcript_id "TCONS_00084293"; exon_number "3"; |
| oId "CUFF.90525.12"; tss_id "TSS64108"; |           |   |   |   |                                                                         |
| chr7 Cufflinks exon130737184            | 130737314 | . | - | . | gene_id "XLOC_051126"; transcript_id "TCONS_00084293"; exon_number "4"; |

|                                         |   |   |   |                                                                         |  |
|-----------------------------------------|---|---|---|-------------------------------------------------------------------------|--|
| oId "CUFF.90525.12"; tss_id "TSS64108"; |   |   |   |                                                                         |  |
| chr7 Cufflinks exon130792479 130793562  | . | - | . | gene_id "XLOC_051126"; transcript_id "TCONS_00084293"; exon_number "5"; |  |
| oId "CUFF.90525.12"; tss_id "TSS64108"; |   |   |   |                                                                         |  |
| chr7 Cufflinks exon130794496 130794675  | . | - | . | gene_id "XLOC_051126"; transcript_id "TCONS_00084293"; exon_number "6"; |  |
| oId "CUFF.90525.12"; tss_id "TSS64108"; |   |   |   |                                                                         |  |
| chr7 Cufflinks exon130628919 130630594  | . | - | . | gene_id "XLOC_051126"; transcript_id "TCONS_00084294"; exon_number "1"; |  |
| oId "CUFF.90525.13"; tss_id "TSS64108"; |   |   |   |                                                                         |  |
| chr7 Cufflinks exon130644628 130644729  | . | - | . | gene_id "XLOC_051126"; transcript_id "TCONS_00084294"; exon_number "2"; |  |
| oId "CUFF.90525.13"; tss_id "TSS64108"; |   |   |   |                                                                         |  |
| chr7 Cufflinks exon130668812 130668868  | . | - | . | gene_id "XLOC_051126"; transcript_id "TCONS_00084294"; exon_number "3"; |  |
| oId "CUFF.90525.13"; tss_id "TSS64108"; |   |   |   |                                                                         |  |
| chr7 Cufflinks exon130737184 130737314  | . | - | . | gene_id "XLOC_051126"; transcript_id "TCONS_00084294"; exon_number "4"; |  |
| oId "CUFF.90525.13"; tss_id "TSS64108"; |   |   |   |                                                                         |  |
| chr7 Cufflinks exon130792479 130793562  | . | - | . | gene_id "XLOC_051126"; transcript_id "TCONS_00084294"; exon_number "5"; |  |
| oId "CUFF.90525.13"; tss_id "TSS64108"; |   |   |   |                                                                         |  |
| chr7 Cufflinks exon130794496 130794675  | . | - | . | gene_id "XLOC_051126"; transcript_id "TCONS_00084294"; exon_number "6"; |  |
| oId "CUFF.90525.13"; tss_id "TSS64108"; |   |   |   |                                                                         |  |
| chr7 Cufflinks exon130628919 130630594  | . | - | . | gene_id "XLOC_051126"; transcript_id "TCONS_00084292"; exon_number "1"; |  |
| oId "CUFF.90525.11"; tss_id "TSS64108"; |   |   |   |                                                                         |  |
| chr7 Cufflinks exon130668812 130668868  | . | - | . | gene_id "XLOC_051126"; transcript_id "TCONS_00084292"; exon_number "2"; |  |
| oId "CUFF.90525.11"; tss_id "TSS64108"; |   |   |   |                                                                         |  |
| chr7 Cufflinks exon130737184 130737314  | . | - | . | gene_id "XLOC_051126"; transcript_id "TCONS_00084292"; exon_number "3"; |  |
| oId "CUFF.90525.11"; tss_id "TSS64108"; |   |   |   |                                                                         |  |
| chr7 Cufflinks exon130792479 130793562  | . | - | . | gene_id "XLOC_051126"; transcript_id "TCONS_00084292"; exon_number "4"; |  |
| oId "CUFF.90525.11"; tss_id "TSS64108"; |   |   |   |                                                                         |  |
| chr7 Cufflinks exon130794496 130794675  | . | - | . | gene_id "XLOC_051126"; transcript_id "TCONS_00084292"; exon_number "5"; |  |
| oId "CUFF.90525.11"; tss_id "TSS64108"; |   |   |   |                                                                         |  |
| chr7 Cufflinks exon130628919 130630594  | . | - | . | gene_id "XLOC_051126"; transcript_id "TCONS_00084291"; exon_number "1"; |  |
| oId "CUFF.90525.10"; tss_id "TSS64108"; |   |   |   |                                                                         |  |
| chr7 Cufflinks exon130652148 130652276  | . | - | . | gene_id "XLOC_051126"; transcript_id "TCONS_00084291"; exon_number "2"; |  |
| oId "CUFF.90525.10"; tss_id "TSS64108"; |   |   |   |                                                                         |  |
| chr7 Cufflinks exon130668812 130668868  | . | - | . | gene_id "XLOC_051126"; transcript_id "TCONS_00084291"; exon_number "3"; |  |
| oId "CUFF.90525.10"; tss_id "TSS64108"; |   |   |   |                                                                         |  |
| chr7 Cufflinks exon130737184 130737314  | . | - | . | gene_id "XLOC_051126"; transcript_id "TCONS_00084291"; exon_number "4"; |  |
| oId "CUFF.90525.10"; tss_id "TSS64108"; |   |   |   |                                                                         |  |
| chr7 Cufflinks exon130792479 130793562  | . | - | . | gene_id "XLOC_051126"; transcript_id "TCONS_00084291"; exon_number "5"; |  |
| oId "CUFF.90525.10"; tss_id "TSS64108"; |   |   |   |                                                                         |  |
| chr7 Cufflinks exon130794496 130794675  | . | - | . | gene_id "XLOC_051126"; transcript_id "TCONS_00084291"; exon_number "6"; |  |
| oId "CUFF.90525.10"; tss_id "TSS64108"; |   |   |   |                                                                         |  |
| chr7 Cufflinks exon130628919 130629206  | . | - | . | gene_id "XLOC_051126"; transcript_id "TCONS_00084295"; exon_number "1"; |  |
| oId "CUFF.90525.14"; tss_id "TSS64102"; |   |   |   |                                                                         |  |
| chr7 Cufflinks exon130630479 130630594  | . | - | . | gene_id "XLOC_051126"; transcript_id "TCONS_00084295"; exon_number "2"; |  |
| oId "CUFF.90525.14"; tss_id "TSS64102"; |   |   |   |                                                                         |  |

|                                         |           |   |   |   |                                                                         |
|-----------------------------------------|-----------|---|---|---|-------------------------------------------------------------------------|
| chr7 Cufflinks exon130644628            | 130644729 | . | - | . | gene_id "XLOC_051126"; transcript_id "TCONS_00084295"; exon_number "3"; |
| oId "CUFF.90525.14"; tss_id "TSS64102"; |           |   |   |   |                                                                         |
| chr7 Cufflinks exon130668812            | 130668868 | . | - | . | gene_id "XLOC_051126"; transcript_id "TCONS_00084295"; exon_number "4"; |
| oId "CUFF.90525.14"; tss_id "TSS64102"; |           |   |   |   |                                                                         |
| chr7 Cufflinks exon130737184            | 130737314 | . | - | . | gene_id "XLOC_051126"; transcript_id "TCONS_00084295"; exon_number "5"; |
| oId "CUFF.90525.14"; tss_id "TSS64102"; |           |   |   |   |                                                                         |
| chr7 Cufflinks exon130792479            | 130793562 | . | - | . | gene_id "XLOC_051126"; transcript_id "TCONS_00084295"; exon_number "6"; |
| oId "CUFF.90525.14"; tss_id "TSS64102"; |           |   |   |   |                                                                         |
| chr7 Cufflinks exon130794496            | 130794787 | . | - | . | gene_id "XLOC_051126"; transcript_id "TCONS_00084295"; exon_number "7"; |
| oId "CUFF.90525.14"; tss_id "TSS64102"; |           |   |   |   |                                                                         |
| chr7 Cufflinks exon134053569            | 134054296 | . | - | . | gene_id "XLOC_051138"; transcript_id "TCONS_00084319"; exon_number "1"; |
| oId "CUFF.90577.1"; tss_id "TSS64125";  |           |   |   |   |                                                                         |
| chr7 Cufflinks exon134055467            | 134055670 | . | - | . | gene_id "XLOC_051138"; transcript_id "TCONS_00084319"; exon_number "2"; |
| oId "CUFF.90577.1"; tss_id "TSS64125";  |           |   |   |   |                                                                         |
| chr7 Cufflinks exon134056097            | 134056272 | . | - | . | gene_id "XLOC_051138"; transcript_id "TCONS_00084319"; exon_number "3"; |
| oId "CUFF.90577.1"; tss_id "TSS64125";  |           |   |   |   |                                                                         |
| chr7 Cufflinks exon134102724            | 134103726 | . | - | . | gene_id "XLOC_051138"; transcript_id "TCONS_00084319"; exon_number "4"; |
| oId "CUFF.90577.1"; tss_id "TSS64125";  |           |   |   |   |                                                                         |
| chr7 Cufflinks exon134117066            | 134117214 | . | - | . | gene_id "XLOC_051138"; transcript_id "TCONS_00084319"; exon_number "5"; |
| oId "CUFF.90577.1"; tss_id "TSS64125";  |           |   |   |   |                                                                         |
| chr7 Cufflinks exon134078201            | 134078257 | . | - | . | gene_id "XLOC_051138"; transcript_id "TCONS_00084321"; exon_number "1"; |
| oId "CUFF.90577.3"; tss_id "TSS64125";  |           |   |   |   |                                                                         |
| chr7 Cufflinks exon134101073            | 134101164 | . | - | . | gene_id "XLOC_051138"; transcript_id "TCONS_00084321"; exon_number "2"; |
| oId "CUFF.90577.3"; tss_id "TSS64125";  |           |   |   |   |                                                                         |
| chr7 Cufflinks exon134102463            | 134102588 | . | - | . | gene_id "XLOC_051138"; transcript_id "TCONS_00084321"; exon_number "3"; |
| oId "CUFF.90577.3"; tss_id "TSS64125";  |           |   |   |   |                                                                         |
| chr7 Cufflinks exon134102724            | 134103726 | . | - | . | gene_id "XLOC_051138"; transcript_id "TCONS_00084321"; exon_number "4"; |
| oId "CUFF.90577.3"; tss_id "TSS64125";  |           |   |   |   |                                                                         |
| chr7 Cufflinks exon134117066            | 134117214 | . | - | . | gene_id "XLOC_051138"; transcript_id "TCONS_00084321"; exon_number "5"; |
| oId "CUFF.90577.3"; tss_id "TSS64125";  |           |   |   |   |                                                                         |
| chr7 Cufflinks exon134078201            | 134078257 | . | - | . | gene_id "XLOC_051138"; transcript_id "TCONS_00084320"; exon_number "1"; |
| oId "CUFF.90577.2"; tss_id "TSS64125";  |           |   |   |   |                                                                         |
| chr7 Cufflinks exon134102724            | 134103726 | . | - | . | gene_id "XLOC_051138"; transcript_id "TCONS_00084320"; exon_number "2"; |
| oId "CUFF.90577.2"; tss_id "TSS64125";  |           |   |   |   |                                                                         |
| chr7 Cufflinks exon134117066            | 134117214 | . | - | . | gene_id "XLOC_051138"; transcript_id "TCONS_00084320"; exon_number "3"; |
| oId "CUFF.90577.2"; tss_id "TSS64125";  |           |   |   |   |                                                                         |
| chr7 Cufflinks exon134102000            | 134102588 | . | - | . | gene_id "XLOC_051138"; transcript_id "TCONS_00084324"; exon_number "1"; |
| oId "CUFF.90577.6"; tss_id "TSS64125";  |           |   |   |   |                                                                         |
| chr7 Cufflinks exon134102724            | 134103726 | . | - | . | gene_id "XLOC_051138"; transcript_id "TCONS_00084324"; exon_number "2"; |
| oId "CUFF.90577.6"; tss_id "TSS64125";  |           |   |   |   |                                                                         |
| chr7 Cufflinks exon134117066            | 134117214 | . | - | . | gene_id "XLOC_051138"; transcript_id "TCONS_00084324"; exon_number "3"; |
| oId "CUFF.90577.6"; tss_id "TSS64125";  |           |   |   |   |                                                                         |
| chr7 Cufflinks exon134102000            | 134102971 | . | - | . | gene_id "XLOC_051138"; transcript_id "TCONS_00084323"; exon_number "1"; |

oId "CUFF.90577.5"; tss\_id "TSS64125";  
chr7 Cufflinks exon134103379 134103726 . - . gene\_id "XLOC\_051138"; transcript\_id "TCONS\_00084323"; exon\_number "2";  
oId "CUFF.90577.5"; tss\_id "TSS64125";  
chr7 Cufflinks exon134117066 134117214 . - . gene\_id "XLOC\_051138"; transcript\_id "TCONS\_00084323"; exon\_number "3";  
oId "CUFF.90577.5"; tss\_id "TSS64125";  
chr7 Cufflinks exon141404138 141405557 . - . gene\_id "XLOC\_051228"; transcript\_id "TCONS\_00084475"; exon\_number "1";  
oId "CUFF.90888.1"; tss\_id "TSS64247";  
chr7 Cufflinks exon141413989 141414174 . - . gene\_id "XLOC\_051228"; transcript\_id "TCONS\_00084475"; exon\_number "2";  
oId "CUFF.90888.1"; tss\_id "TSS64247";  
chr7 Cufflinks exon141423716 141423824 . - . gene\_id "XLOC\_051228"; transcript\_id "TCONS\_00084475"; exon\_number "3";  
oId "CUFF.90888.1"; tss\_id "TSS64247";  
chr7 Cufflinks exon141427004 141427178 . - . gene\_id "XLOC\_051228"; transcript\_id "TCONS\_00084475"; exon\_number "4";  
oId "CUFF.90888.1"; tss\_id "TSS64247";  
chr7 Cufflinks exon141427792 141427945 . - . gene\_id "XLOC\_051228"; transcript\_id "TCONS\_00084475"; exon\_number "5";  
oId "CUFF.90888.1"; tss\_id "TSS64247";  
chr7 Cufflinks exon141437183 141437367 . - . gene\_id "XLOC\_051228"; transcript\_id "TCONS\_00084475"; exon\_number "6";  
oId "CUFF.90888.1"; tss\_id "TSS64247";  
chr7 Cufflinks exon141437998 141438030 . - . gene\_id "XLOC\_051228"; transcript\_id "TCONS\_00084475"; exon\_number "7";  
oId "CUFF.90888.1"; tss\_id "TSS64247";  
chr7 Cufflinks exon142696832 142696867 . - . gene\_id "XLOC\_051272"; transcript\_id "TCONS\_00084544"; exon\_number "1";  
oId "CUFF.91041.7"; tss\_id "TSS64305";  
chr7 Cufflinks exon142736479 142736578 . - . gene\_id "XLOC\_051272"; transcript\_id "TCONS\_00084544"; exon\_number "2";  
oId "CUFF.91041.7"; tss\_id "TSS64305";  
chr7 Cufflinks exon142952395 142952514 . - . gene\_id "XLOC\_051272"; transcript\_id "TCONS\_00084544"; exon\_number "3";  
oId "CUFF.91041.7"; tss\_id "TSS64305";  
chr7 Cufflinks exon142982811 142982931 . - . gene\_id "XLOC\_051272"; transcript\_id "TCONS\_00084544"; exon\_number "4";  
oId "CUFF.91041.7"; tss\_id "TSS64305";  
chr7 Cufflinks exon142983070 142985128 . - . gene\_id "XLOC\_051272"; transcript\_id "TCONS\_00084544"; exon\_number "5";  
oId "CUFF.91041.7"; tss\_id "TSS64305";  
chr7 Cufflinks exon142728810 142730009 . - . gene\_id "XLOC\_051272"; transcript\_id "TCONS\_00084551"; exon\_number "1";  
oId "CUFF.91041.8"; tss\_id "TSS64305";  
chr7 Cufflinks exon142736479 142736578 . - . gene\_id "XLOC\_051272"; transcript\_id "TCONS\_00084551"; exon\_number "2";  
oId "CUFF.91041.8"; tss\_id "TSS64305";  
chr7 Cufflinks exon142952392 142952514 . - . gene\_id "XLOC\_051272"; transcript\_id "TCONS\_00084551"; exon\_number "3";  
oId "CUFF.91041.8"; tss\_id "TSS64305";  
chr7 Cufflinks exon142982811 142982931 . - . gene\_id "XLOC\_051272"; transcript\_id "TCONS\_00084551"; exon\_number "4";  
oId "CUFF.91041.8"; tss\_id "TSS64305";  
chr7 Cufflinks exon142983070 142985259 . - . gene\_id "XLOC\_051272"; transcript\_id "TCONS\_00084551"; exon\_number "5";  
oId "CUFF.91041.8"; tss\_id "TSS64305";  
chr7 Cufflinks exon142800348 142800397 . - . gene\_id "XLOC\_051272"; transcript\_id "TCONS\_00084554"; exon\_number "1";  
oId "CUFF.91041.9"; tss\_id "TSS64305";  
chr7 Cufflinks exon142808410 142808491 . - . gene\_id "XLOC\_051272"; transcript\_id "TCONS\_00084554"; exon\_number "2";  
oId "CUFF.91041.9"; tss\_id "TSS64305";

chr7 Cufflinks exon142952395 142952514 . - . gene\_id "XLOC\_051272"; transcript\_id "TCONS\_00084554"; exon\_number "3";  
oId "CUFF.91041.9"; tss\_id "TSS64305";  
chr7 Cufflinks exon142982811 142982931 . - . gene\_id "XLOC\_051272"; transcript\_id "TCONS\_00084554"; exon\_number "4";  
oId "CUFF.91041.9"; tss\_id "TSS64305";  
chr7 Cufflinks exon142983070 142985181 . - . gene\_id "XLOC\_051272"; transcript\_id "TCONS\_00084554"; exon\_number "5";  
oId "CUFF.91041.9"; tss\_id "TSS64305";  
chr7 Cufflinks exon142866537 142866586 . - . gene\_id "XLOC\_051272"; transcript\_id "TCONS\_00084556"; exon\_number "1";  
oId "CUFF.91041.10"; tss\_id "TSS64305";  
chr7 Cufflinks exon142952392 142952514 . - . gene\_id "XLOC\_051272"; transcript\_id "TCONS\_00084556"; exon\_number "2";  
oId "CUFF.91041.10"; tss\_id "TSS64305";  
chr7 Cufflinks exon142982811 142982931 . - . gene\_id "XLOC\_051272"; transcript\_id "TCONS\_00084556"; exon\_number "3";  
oId "CUFF.91041.10"; tss\_id "TSS64305";  
chr7 Cufflinks exon142983070 142985259 . - . gene\_id "XLOC\_051272"; transcript\_id "TCONS\_00084556"; exon\_number "4";  
oId "CUFF.91041.10"; tss\_id "TSS64305";  
chr7 Cufflinks exon142959481 142959967 . - . gene\_id "XLOC\_051272"; transcript\_id "TCONS\_00084567"; exon\_number "1";  
oId "CUFF.91041.11"; tss\_id "TSS64305";  
chr7 Cufflinks exon142982811 142982931 . - . gene\_id "XLOC\_051272"; transcript\_id "TCONS\_00084567"; exon\_number "2";  
oId "CUFF.91041.11"; tss\_id "TSS64305";  
chr7 Cufflinks exon142983070 142985181 . - . gene\_id "XLOC\_051272"; transcript\_id "TCONS\_00084567"; exon\_number "3";  
oId "CUFF.91041.11"; tss\_id "TSS64305";  
chr7 Cufflinks exon142982049 142982931 . - . gene\_id "XLOC\_051272"; transcript\_id "TCONS\_00084569"; exon\_number "1";  
oId "CUFF.91041.13"; tss\_id "TSS64305";  
chr7 Cufflinks exon142983070 142985237 . - . gene\_id "XLOC\_051272"; transcript\_id "TCONS\_00084569"; exon\_number "2";  
oId "CUFF.91041.13"; tss\_id "TSS64305";  
chr7 Cufflinks exon142982049 142982931 . - . gene\_id "XLOC\_051272"; transcript\_id "TCONS\_00084570"; exon\_number "1";  
oId "CUFF.91041.12"; tss\_id "TSS64305";  
chr7 Cufflinks exon142983070 142983264 . - . gene\_id "XLOC\_051272"; transcript\_id "TCONS\_00084570"; exon\_number "2";  
oId "CUFF.91041.12"; tss\_id "TSS64305";  
chr7 Cufflinks exon142984136 142985259 . - . gene\_id "XLOC\_051272"; transcript\_id "TCONS\_00084570"; exon\_number "3";  
oId "CUFF.91041.12"; tss\_id "TSS64305";  
chr7 Cufflinks exon148498642 148498925 . - . gene\_id "XLOC\_051312"; transcript\_id "TCONS\_00084602"; exon\_number "1";  
oId "CUFF.91154.1"; tss\_id "TSS64348";  
chr7 Cufflinks exon148499094 148501180 . - . gene\_id "XLOC\_051312"; transcript\_id "TCONS\_00084602"; exon\_number "2";  
oId "CUFF.91154.1"; tss\_id "TSS64348";  
chr7 Cufflinks exon149281933 149282494 . - . gene\_id "XLOC\_051337"; transcript\_id "TCONS\_00084644"; exon\_number "1";  
oId "CUFF.91252.1"; tss\_id "TSS64379";  
chr7 Cufflinks exon149306154 149308593 . - . gene\_id "XLOC\_051337"; transcript\_id "TCONS\_00084644"; exon\_number "2";  
oId "CUFF.91252.1"; tss\_id "TSS64379";  
chr7 Cufflinks exon149308656 149309434 . - . gene\_id "XLOC\_051338"; transcript\_id "TCONS\_00084645"; exon\_number "1";  
oId "CUFF.91253.1"; tss\_id "TSS64380";  
chr7 Cufflinks exon149310639 149311955 . - . gene\_id "XLOC\_051338"; transcript\_id "TCONS\_00084645"; exon\_number "2";  
oId "CUFF.91253.1"; tss\_id "TSS64380";  
chr7 Cufflinks exon149564783 149566947 . - . gene\_id "XLOC\_051340"; transcript\_id "TCONS\_00084654"; exon\_number "1";

|                                                                                  |   |   |   |                                                                         |
|----------------------------------------------------------------------------------|---|---|---|-------------------------------------------------------------------------|
| oId "CUFF.91271.1"; tss_id "TSS64385";<br>chr7 Cufflinks exon149567331 149567440 | . | - | . | gene_id "XLOC_051340"; transcript_id "TCONS_00084654"; exon_number "2"; |
| oId "CUFF.91271.1"; tss_id "TSS64385";<br>chr7 Cufflinks exon149568731 149568885 | . | - | . | gene_id "XLOC_051340"; transcript_id "TCONS_00084654"; exon_number "3"; |
| oId "CUFF.91271.1"; tss_id "TSS64385";<br>chr7 Cufflinks exon149570313 149570951 | . | - | . | gene_id "XLOC_051340"; transcript_id "TCONS_00084654"; exon_number "4"; |
| oId "CUFF.91271.1"; tss_id "TSS64385";<br>chr7 Cufflinks exon149910067 149910485 | . | - | . | gene_id "XLOC_051383"; transcript_id "TCONS_00084698"; exon_number "1"; |
| oId "CUFF.91349.2"; tss_id "TSS64429";<br>chr7 Cufflinks exon149911033 149911111 | . | - | . | gene_id "XLOC_051383"; transcript_id "TCONS_00084698"; exon_number "2"; |
| oId "CUFF.91349.2"; tss_id "TSS64429";<br>chr7 Cufflinks exon151816822 151819241 | . | - | . | gene_id "XLOC_051465"; transcript_id "TCONS_00084826"; exon_number "1"; |
| oId "CUFF.91550.1"; tss_id "TSS64537";<br>chr7 Cufflinks exon151827834 151827931 | . | - | . | gene_id "XLOC_051465"; transcript_id "TCONS_00084826"; exon_number "2"; |
| oId "CUFF.91550.1"; tss_id "TSS64537";<br>chr7 Cufflinks exon151828341 151828360 | . | - | . | gene_id "XLOC_051465"; transcript_id "TCONS_00084826"; exon_number "3"; |
| oId "CUFF.91550.1"; tss_id "TSS64537";<br>chr7 Cufflinks exon151816822 151819241 | . | - | . | gene_id "XLOC_051465"; transcript_id "TCONS_00084827"; exon_number "1"; |
| oId "CUFF.91550.2"; tss_id "TSS64538";<br>chr7 Cufflinks exon151827834 151827930 | . | - | . | gene_id "XLOC_051465"; transcript_id "TCONS_00084827"; exon_number "2"; |
| oId "CUFF.91550.2"; tss_id "TSS64538";<br>chr7 Cufflinks exon151828341 151828668 | . | - | . | gene_id "XLOC_051465"; transcript_id "TCONS_00084827"; exon_number "3"; |
| oId "CUFF.91550.2"; tss_id "TSS64538";<br>chr7 Cufflinks exon151828977 151829076 | . | - | . | gene_id "XLOC_051465"; transcript_id "TCONS_00084827"; exon_number "4"; |
| oId "CUFF.91550.2"; tss_id "TSS64538";<br>chr7 Cufflinks exon151827848 151827930 | . | - | . | gene_id "XLOC_051465"; transcript_id "TCONS_00084828"; exon_number "1"; |
| oId "CUFF.91550.3"; tss_id "TSS64538";<br>chr7 Cufflinks exon151828341 151829156 | . | - | . | gene_id "XLOC_051465"; transcript_id "TCONS_00084828"; exon_number "2"; |
| oId "CUFF.91550.3"; tss_id "TSS64538";<br>chr7 Cufflinks exon155104099 155104716 | . | - | . | gene_id "XLOC_051478"; transcript_id "TCONS_00084849"; exon_number "1"; |
| oId "CUFF.91641.1"; tss_id "TSS64554";<br>chr7 Cufflinks exon155114383 155114576 | . | - | . | gene_id "XLOC_051478"; transcript_id "TCONS_00084849"; exon_number "2"; |
| oId "CUFF.91641.1"; tss_id "TSS64554";<br>chr7 Cufflinks exon155141716 155141787 | . | - | . | gene_id "XLOC_051480"; transcript_id "TCONS_00084851"; exon_number "1"; |
| oId "CUFF.91645.1"; tss_id "TSS64556";<br>chr7 Cufflinks exon155144962 155145506 | . | - | . | gene_id "XLOC_051480"; transcript_id "TCONS_00084851"; exon_number "2"; |
| oId "CUFF.91645.1"; tss_id "TSS64556";<br>chr7 Cufflinks exon155143565 155145082 | . | - | . | gene_id "XLOC_051480"; transcript_id "TCONS_00084853"; exon_number "1"; |
| oId "CUFF.91645.4"; tss_id "TSS64557";<br>chr7 Cufflinks exon155148985 155149228 | . | - | . | gene_id "XLOC_051480"; transcript_id "TCONS_00084853"; exon_number "2"; |
| oId "CUFF.91645.4"; tss_id "TSS64557";<br>chr7 Cufflinks exon155149447 155152970 | . | - | . | gene_id "XLOC_051480"; transcript_id "TCONS_00084853"; exon_number "3"; |
| oId "CUFF.91645.4"; tss_id "TSS64557";                                           |   |   |   |                                                                         |

chr7 Cufflinks exon155143565 155144286 . - . gene\_id "XLOC\_051480"; transcript\_id "TCONS\_00084854"; exon\_number "1";  
oId "CUFF.91645.2"; tss\_id "TSS64558";

chr7 Cufflinks exon155144962 155145082 . - . gene\_id "XLOC\_051480"; transcript\_id "TCONS\_00084854"; exon\_number "2";  
oId "CUFF.91645.2"; tss\_id "TSS64558";

chr7 Cufflinks exon155148985 155149228 . - . gene\_id "XLOC\_051480"; transcript\_id "TCONS\_00084854"; exon\_number "3";  
oId "CUFF.91645.2"; tss\_id "TSS64558";

chr7 Cufflinks exon155149447 155151475 . - . gene\_id "XLOC\_051480"; transcript\_id "TCONS\_00084854"; exon\_number "4";  
oId "CUFF.91645.2"; tss\_id "TSS64558";

chr7 Cufflinks exon155152595 155152738 . - . gene\_id "XLOC\_051480"; transcript\_id "TCONS\_00084854"; exon\_number "5";  
oId "CUFF.91645.2"; tss\_id "TSS64558";

chr7 Cufflinks exon155153623 155153779 . - . gene\_id "XLOC\_051480"; transcript\_id "TCONS\_00084854"; exon\_number "6";  
oId "CUFF.91645.2"; tss\_id "TSS64558";

chr7 Cufflinks exon155155507 155155645 . - . gene\_id "XLOC\_051480"; transcript\_id "TCONS\_00084854"; exon\_number "7";  
oId "CUFF.91645.2"; tss\_id "TSS64558";

chr7 Cufflinks exon155155799 155155892 . - . gene\_id "XLOC\_051480"; transcript\_id "TCONS\_00084854"; exon\_number "8";  
oId "CUFF.91645.2"; tss\_id "TSS64558";

chr7 Cufflinks exon155160504 155160628 . - . gene\_id "XLOC\_051480"; transcript\_id "TCONS\_00084854"; exon\_number "9";  
oId "CUFF.91645.2"; tss\_id "TSS64558";

chr7 Cufflinks exon155402350 155404111 . - . gene\_id "XLOC\_051484"; transcript\_id "TCONS\_00084859"; exon\_number "1";  
oId "CUFF.91653.1"; tss\_id "TSS64563";

chr7 Cufflinks exon155410630 155410694 . - . gene\_id "XLOC\_051484"; transcript\_id "TCONS\_00084859"; exon\_number "2";  
oId "CUFF.91653.1"; tss\_id "TSS64563";

chr7 Cufflinks exon156230483 156231689 . - . gene\_id "XLOC\_051490"; transcript\_id "TCONS\_00084867"; exon\_number "1";  
oId "CUFF.91671.1"; tss\_id "TSS64571";

chr7 Cufflinks exon156233924 156234074 . - . gene\_id "XLOC\_051490"; transcript\_id "TCONS\_00084867"; exon\_number "2";  
oId "CUFF.91671.1"; tss\_id "TSS64571";

chr7 Cufflinks exon156236943 156238282 . - . gene\_id "XLOC\_051490"; transcript\_id "TCONS\_00084867"; exon\_number "3";  
oId "CUFF.91671.1"; tss\_id "TSS64571";

chr7 Cufflinks exon156230483 156231689 . - . gene\_id "XLOC\_051490"; transcript\_id "TCONS\_00084868"; exon\_number "1";  
oId "CUFF.91671.2"; tss\_id "TSS64572";

chr7 Cufflinks exon156233924 156234074 . - . gene\_id "XLOC\_051490"; transcript\_id "TCONS\_00084868"; exon\_number "2";  
oId "CUFF.91671.2"; tss\_id "TSS64572";

chr7 Cufflinks exon156263849 156265405 . - . gene\_id "XLOC\_051490"; transcript\_id "TCONS\_00084868"; exon\_number "3";  
oId "CUFF.91671.2"; tss\_id "TSS64572";

chr7 Cufflinks exon156278418 156278488 . - . gene\_id "XLOC\_051490"; transcript\_id "TCONS\_00084868"; exon\_number "4";  
oId "CUFF.91671.2"; tss\_id "TSS64572";

chr7 Cufflinks exon156264793 156265405 . - . gene\_id "XLOC\_051490"; transcript\_id "TCONS\_00084872"; exon\_number "1";  
oId "CUFF.91671.3"; tss\_id "TSS64573";

chr7 Cufflinks exon156395745 156395889 . - . gene\_id "XLOC\_051490"; transcript\_id "TCONS\_00084872"; exon\_number "2";  
oId "CUFF.91671.3"; tss\_id "TSS64573";

chr8 Cufflinks exon1919563 1919684 . + . gene\_id "XLOC\_051573"; transcript\_id "TCONS\_00084991"; exon\_number "1"; oId  
"CUFF.91925.1"; tss\_id "TSS64677";

chr8 Cufflinks exon1920091 1920203 . + . gene\_id "XLOC\_051573"; transcript\_id "TCONS\_00084991"; exon\_number "2"; oId

"CUFF.91925.1"; tss\_id "TSS64677";  
chr8 Cufflinks exon1924065 1924610 . + . gene\_id "XLOC\_051573"; transcript\_id "TCONS\_00084991"; exon\_number "3"; oId  
"CUFF.91925.1"; tss\_id "TSS64677";  
chr8 Cufflinks exon2187325 2187891 . + . gene\_id "XLOC\_051585"; transcript\_id "TCONS\_00085010"; exon\_number "1"; oId  
"CUFF.91949.1"; tss\_id "TSS64694";  
chr8 Cufflinks exon2188855 2189069 . + . gene\_id "XLOC\_051585"; transcript\_id "TCONS\_00085010"; exon\_number "2"; oId  
"CUFF.91949.1"; tss\_id "TSS64694";  
chr8 Cufflinks exon2191872 2192024 . + . gene\_id "XLOC\_051585"; transcript\_id "TCONS\_00085010"; exon\_number "3"; oId  
"CUFF.91949.1"; tss\_id "TSS64694";  
chr8 Cufflinks exon2196255 2196323 . + . gene\_id "XLOC\_051585"; transcript\_id "TCONS\_00085010"; exon\_number "4"; oId  
"CUFF.91949.1"; tss\_id "TSS64694";  
chr8 Cufflinks exon2197583 2197700 . + . gene\_id "XLOC\_051585"; transcript\_id "TCONS\_00085010"; exon\_number "5"; oId  
"CUFF.91949.1"; tss\_id "TSS64694";  
chr8 Cufflinks exon2199073 2199235 . + . gene\_id "XLOC\_051585"; transcript\_id "TCONS\_00085010"; exon\_number "6"; oId  
"CUFF.91949.1"; tss\_id "TSS64694";  
chr8 Cufflinks exon2226667 2226732 . + . gene\_id "XLOC\_051585"; transcript\_id "TCONS\_00085010"; exon\_number "7"; oId  
"CUFF.91949.1"; tss\_id "TSS64694";  
chr8 Cufflinks exon2226846 2229037 . + . gene\_id "XLOC\_051585"; transcript\_id "TCONS\_00085010"; exon\_number "8"; oId  
"CUFF.91949.1"; tss\_id "TSS64694";  
chr8 Cufflinks exon2191890 2192024 . + . gene\_id "XLOC\_051585"; transcript\_id "TCONS\_00085012"; exon\_number "1"; oId  
"CUFF.91949.3"; tss\_id "TSS64695";  
chr8 Cufflinks exon2196243 2196323 . + . gene\_id "XLOC\_051585"; transcript\_id "TCONS\_00085012"; exon\_number "2"; oId  
"CUFF.91949.3"; tss\_id "TSS64695";  
chr8 Cufflinks exon2197080 2197153 . + . gene\_id "XLOC\_051585"; transcript\_id "TCONS\_00085012"; exon\_number "3"; oId  
"CUFF.91949.3"; tss\_id "TSS64695";  
chr8 Cufflinks exon2197583 2197700 . + . gene\_id "XLOC\_051585"; transcript\_id "TCONS\_00085012"; exon\_number "4"; oId  
"CUFF.91949.3"; tss\_id "TSS64695";  
chr8 Cufflinks exon2199073 2202014 . + . gene\_id "XLOC\_051585"; transcript\_id "TCONS\_00085012"; exon\_number "5"; oId  
"CUFF.91949.3"; tss\_id "TSS64695";  
chr8 Cufflinks exon2191890 2192024 . + . gene\_id "XLOC\_051585"; transcript\_id "TCONS\_00085011"; exon\_number "1"; oId  
"CUFF.91949.2"; tss\_id "TSS64695";  
chr8 Cufflinks exon2197583 2197700 . + . gene\_id "XLOC\_051585"; transcript\_id "TCONS\_00085011"; exon\_number "2"; oId  
"CUFF.91949.2"; tss\_id "TSS64695";  
chr8 Cufflinks exon2199073 2202014 . + . gene\_id "XLOC\_051585"; transcript\_id "TCONS\_00085011"; exon\_number "3"; oId  
"CUFF.91949.2"; tss\_id "TSS64695";  
chr8 Cufflinks exon2196637 2197153 . + . gene\_id "XLOC\_051585"; transcript\_id "TCONS\_00085013"; exon\_number "1"; oId  
"CUFF.91949.4"; tss\_id "TSS64696";  
chr8 Cufflinks exon2197583 2197700 . + . gene\_id "XLOC\_051585"; transcript\_id "TCONS\_00085013"; exon\_number "2"; oId  
"CUFF.91949.4"; tss\_id "TSS64696";  
chr8 Cufflinks exon2199073 2202014 . + . gene\_id "XLOC\_051585"; transcript\_id "TCONS\_00085013"; exon\_number "3"; oId  
"CUFF.91949.4"; tss\_id "TSS64696";  
chr8 Cufflinks exon6692138 6693139 . + . gene\_id "XLOC\_051617"; transcript\_id "TCONS\_00085046"; exon\_number "1"; oId  
"CUFF.92115.1"; tss\_id "TSS64728";



chr8 Cufflinks exon6693690 6693743 . + . gene\_id "XLOC\_051617"; transcript\_id "TCONS\_00085046"; exon\_number "2"; oId "CUFF.92115.1"; tss\_id "TSS64728";  
chr8 Cufflinks exon6699190 6702193 . + . gene\_id "XLOC\_051617"; transcript\_id "TCONS\_00085046"; exon\_number "3"; oId "CUFF.92115.1"; tss\_id "TSS64728";  
chr8 Cufflinks exon6702284 6702451 . + . gene\_id "XLOC\_051617"; transcript\_id "TCONS\_00085046"; exon\_number "4"; oId "CUFF.92115.1"; tss\_id "TSS64728";  
chr8 Cufflinks exon6730703 6733624 . + . gene\_id "XLOC\_051617"; transcript\_id "TCONS\_00085046"; exon\_number "5"; oId "CUFF.92115.1"; tss\_id "TSS64728";  
chr8 Cufflinks exon6693076 6693139 . + . gene\_id "XLOC\_051617"; transcript\_id "TCONS\_00085047"; exon\_number "1"; oId "CUFF.92115.2"; tss\_id "TSS64729";  
chr8 Cufflinks exon6693488 6693743 . + . gene\_id "XLOC\_051617"; transcript\_id "TCONS\_00085047"; exon\_number "2"; oId "CUFF.92115.2"; tss\_id "TSS64729";  
chr8 Cufflinks exon6699190 6699975 . + . gene\_id "XLOC\_051617"; transcript\_id "TCONS\_00085047"; exon\_number "3"; oId "CUFF.92115.2"; tss\_id "TSS64729";  
chr8 Cufflinks exon6696222 6702193 . + . gene\_id "XLOC\_051617"; transcript\_id "TCONS\_00085048"; exon\_number "1"; oId "CUFF.92115.3"; tss\_id "TSS64730";  
chr8 Cufflinks exon6702284 6702567 . + . gene\_id "XLOC\_051617"; transcript\_id "TCONS\_00085048"; exon\_number "2"; oId "CUFF.92115.3"; tss\_id "TSS64730";  
chr8 Cufflinks exon6696278 6699489 . + . gene\_id "XLOC\_051617"; transcript\_id "TCONS\_00085049"; exon\_number "1"; oId "CUFF.92115.4"; tss\_id "TSS64730";  
chr8 Cufflinks exon6702284 6702451 . + . gene\_id "XLOC\_051617"; transcript\_id "TCONS\_00085049"; exon\_number "2"; oId "CUFF.92115.4"; tss\_id "TSS64730";  
chr8 Cufflinks exon6724917 6728869 . + . gene\_id "XLOC\_051617"; transcript\_id "TCONS\_00085049"; exon\_number "3"; oId "CUFF.92115.4"; tss\_id "TSS64730";  
chr8 Cufflinks exon6786909 6786983 . + . gene\_id "XLOC\_051620"; transcript\_id "TCONS\_00085053"; exon\_number "1"; oId "CUFF.92131.1"; tss\_id "TSS64734";  
chr8 Cufflinks exon6788025 6788431 . + . gene\_id "XLOC\_051620"; transcript\_id "TCONS\_00085053"; exon\_number "2"; oId "CUFF.92131.1"; tss\_id "TSS64734";  
chr8 Cufflinks exon6793469 6794392 . + . gene\_id "XLOC\_051620"; transcript\_id "TCONS\_00085053"; exon\_number "3"; oId "CUFF.92131.1"; tss\_id "TSS64734";  
chr8 Cufflinks exon9009154 9009426 . + . gene\_id "XLOC\_051664"; transcript\_id "TCONS\_00085110"; exon\_number "1"; oId "CUFF.92318.2"; tss\_id "TSS64780";  
chr8 Cufflinks exon9012476 9012586 . + . gene\_id "XLOC\_051664"; transcript\_id "TCONS\_00085110"; exon\_number "2"; oId "CUFF.92318.2"; tss\_id "TSS64780";  
chr8 Cufflinks exon9013662 9013814 . + . gene\_id "XLOC\_051664"; transcript\_id "TCONS\_00085110"; exon\_number "3"; oId "CUFF.92318.2"; tss\_id "TSS64780";  
chr8 Cufflinks exon9014281 9014357 . + . gene\_id "XLOC\_051664"; transcript\_id "TCONS\_00085110"; exon\_number "4"; oId "CUFF.92318.2"; tss\_id "TSS64780";  
chr8 Cufflinks exon9015531 9016449 . + . gene\_id "XLOC\_051664"; transcript\_id "TCONS\_00085110"; exon\_number "5"; oId "CUFF.92318.2"; tss\_id "TSS64780";  
chr8 Cufflinks exon9009154 9009426 . + . gene\_id "XLOC\_051664"; transcript\_id "TCONS\_00085111"; exon\_number "1"; oId "CUFF.92318.3"; tss\_id "TSS64780";  
chr8 Cufflinks exon9012476 9012586 . + . gene\_id "XLOC\_051664"; transcript\_id "TCONS\_00085111"; exon\_number "2"; oId

|                                                                              |   |   |                                                                             |
|------------------------------------------------------------------------------|---|---|-----------------------------------------------------------------------------|
| "CUFF.92318.3"; tss_id "TSS64780";<br>chr8 Cufflinks exon9014281 9014357 .   | + | . | gene_id "XLOC_051664"; transcript_id "TCONS_00085111"; exon_number "3"; oId |
| "CUFF.92318.3"; tss_id "TSS64780";<br>chr8 Cufflinks exon9025286 9027067 .   | + | . | gene_id "XLOC_051664"; transcript_id "TCONS_00085111"; exon_number "4"; oId |
| "CUFF.92318.3"; tss_id "TSS64780";<br>chr8 Cufflinks exon9009226 9009426 .   | + | . | gene_id "XLOC_051664"; transcript_id "TCONS_00085112"; exon_number "1"; oId |
| "CUFF.92318.6"; tss_id "TSS64780";<br>chr8 Cufflinks exon9012476 9012659 .   | + | . | gene_id "XLOC_051664"; transcript_id "TCONS_00085112"; exon_number "2"; oId |
| "CUFF.92318.6"; tss_id "TSS64780";<br>chr8 Cufflinks exon9013662 9013814 .   | + | . | gene_id "XLOC_051664"; transcript_id "TCONS_00085112"; exon_number "3"; oId |
| "CUFF.92318.6"; tss_id "TSS64780";<br>chr8 Cufflinks exon9014281 9014357 .   | + | . | gene_id "XLOC_051664"; transcript_id "TCONS_00085112"; exon_number "4"; oId |
| "CUFF.92318.6"; tss_id "TSS64780";<br>chr8 Cufflinks exon9015531 9016449 .   | + | . | gene_id "XLOC_051664"; transcript_id "TCONS_00085112"; exon_number "5"; oId |
| "CUFF.92318.6"; tss_id "TSS64780";<br>chr8 Cufflinks exon9009226 9009426 .   | + | . | gene_id "XLOC_051664"; transcript_id "TCONS_00085113"; exon_number "1"; oId |
| "CUFF.92318.5"; tss_id "TSS64780";<br>chr8 Cufflinks exon9013662 9014357 .   | + | . | gene_id "XLOC_051664"; transcript_id "TCONS_00085113"; exon_number "2"; oId |
| "CUFF.92318.5"; tss_id "TSS64780";<br>chr8 Cufflinks exon9025286 9027067 .   | + | . | gene_id "XLOC_051664"; transcript_id "TCONS_00085113"; exon_number "3"; oId |
| "CUFF.92318.5"; tss_id "TSS64780";<br>chr8 Cufflinks exon9012695 9013814 .   | + | . | gene_id "XLOC_051664"; transcript_id "TCONS_00085114"; exon_number "1"; oId |
| "CUFF.92318.7"; tss_id "TSS64781";<br>chr8 Cufflinks exon9014281 9014357 .   | + | . | gene_id "XLOC_051664"; transcript_id "TCONS_00085114"; exon_number "2"; oId |
| "CUFF.92318.7"; tss_id "TSS64781";<br>chr8 Cufflinks exon9015531 9016449 .   | + | . | gene_id "XLOC_051664"; transcript_id "TCONS_00085114"; exon_number "3"; oId |
| "CUFF.92318.7"; tss_id "TSS64781";<br>chr8 Cufflinks exon12294087 12294157 . | + | . | gene_id "XLOC_051716"; transcript_id "TCONS_00085188"; exon_number "1"; oId |
| "CUFF.92441.2"; tss_id "TSS64843";<br>chr8 Cufflinks exon12294965 12295219 . | + | . | gene_id "XLOC_051716"; transcript_id "TCONS_00085188"; exon_number "2"; oId |
| "CUFF.92441.2"; tss_id "TSS64843";<br>chr8 Cufflinks exon12295673 12296020 . | + | . | gene_id "XLOC_051716"; transcript_id "TCONS_00085188"; exon_number "3"; oId |
| "CUFF.92441.2"; tss_id "TSS64843";<br>chr8 Cufflinks exon12298478 12298570 . | + | . | gene_id "XLOC_051716"; transcript_id "TCONS_00085188"; exon_number "4"; oId |
| "CUFF.92441.2"; tss_id "TSS64843";<br>chr8 Cufflinks exon12302265 12302403 . | + | . | gene_id "XLOC_051716"; transcript_id "TCONS_00085188"; exon_number "5"; oId |
| "CUFF.92441.2"; tss_id "TSS64843";<br>chr8 Cufflinks exon12388452 12388540 . | + | . | gene_id "XLOC_051716"; transcript_id "TCONS_00085188"; exon_number "6"; oId |
| "CUFF.92441.2"; tss_id "TSS64843";<br>chr8 Cufflinks exon12406996 12408558 . | + | . | gene_id "XLOC_051716"; transcript_id "TCONS_00085188"; exon_number "7"; oId |
| "CUFF.92441.2"; tss_id "TSS64843";<br>chr8 Cufflinks exon16405919 16406025 . | + | . | gene_id "XLOC_051733"; transcript_id "TCONS_00085212"; exon_number "1"; oId |
| "CUFF.92521.1"; tss_id "TSS64862";                                           |   |   |                                                                             |

chr8 Cufflinks exon16424885 16425606 . + . gene\_id "XLOC\_051733"; transcript\_id "TCONS\_00085212"; exon\_number "2";  
oId "CUFF.92521.1"; tss\_id "TSS64862";

chr8 Cufflinks exon20080049 20082243 . + . gene\_id "XLOC\_051765"; transcript\_id "TCONS\_00085266"; exon\_number "1";  
oId "CUFF.92623.3"; tss\_id "TSS64900";

chr8 Cufflinks exon20082793 20083926 . + . gene\_id "XLOC\_051765"; transcript\_id "TCONS\_00085266"; exon\_number "2";  
oId "CUFF.92623.3"; tss\_id "TSS64900";

chr8 Cufflinks exon20080049 20082245 . + . gene\_id "XLOC\_051765"; transcript\_id "TCONS\_00085268"; exon\_number "1";  
oId "CUFF.92623.2"; tss\_id "TSS64900";

chr8 Cufflinks exon20082795 20083330 . + . gene\_id "XLOC\_051765"; transcript\_id "TCONS\_00085268"; exon\_number "2";  
oId "CUFF.92623.2"; tss\_id "TSS64900";

chr8 Cufflinks exon20083950 20087883 . + . gene\_id "XLOC\_051765"; transcript\_id "TCONS\_00085268"; exon\_number "3";  
oId "CUFF.92623.2"; tss\_id "TSS64900";

chr8 Cufflinks exon20080049 20082391 . + . gene\_id "XLOC\_051765"; transcript\_id "TCONS\_00085267"; exon\_number "1";  
oId "CUFF.92623.1"; tss\_id "TSS64900";

chr8 Cufflinks exon20082793 20083330 . + . gene\_id "XLOC\_051765"; transcript\_id "TCONS\_00085267"; exon\_number "2";  
oId "CUFF.92623.1"; tss\_id "TSS64900";

chr8 Cufflinks exon20083950 20087883 . + . gene\_id "XLOC\_051765"; transcript\_id "TCONS\_00085267"; exon\_number "3";  
oId "CUFF.92623.1"; tss\_id "TSS64900";

chr8 Cufflinks exon20080190 20081747 . + . gene\_id "XLOC\_051765"; transcript\_id "TCONS\_00085269"; exon\_number "1";  
oId "CUFF.92623.4"; tss\_id "TSS64901";

chr8 Cufflinks exon20082099 20082283 . + . gene\_id "XLOC\_051765"; transcript\_id "TCONS\_00085269"; exon\_number "2";  
oId "CUFF.92623.4"; tss\_id "TSS64901";

chr8 Cufflinks exon22941868 22942058 . + . gene\_id "XLOC\_051801"; transcript\_id "TCONS\_00085336"; exon\_number "1";  
oId "CUFF.92707.2"; tss\_id "TSS64955";

chr8 Cufflinks exon22947661 22947801 . + . gene\_id "XLOC\_051801"; transcript\_id "TCONS\_00085336"; exon\_number "2";  
oId "CUFF.92707.2"; tss\_id "TSS64955";

chr8 Cufflinks exon22950044 22951362 . + . gene\_id "XLOC\_051801"; transcript\_id "TCONS\_00085336"; exon\_number "3";  
oId "CUFF.92707.2"; tss\_id "TSS64955";

chr8 Cufflinks exon22949853 22949872 . + . gene\_id "XLOC\_051801"; transcript\_id "TCONS\_00085340"; exon\_number "1";  
oId "CUFF.92707.6"; tss\_id "TSS64956";

chr8 Cufflinks exon22950044 22951362 . + . gene\_id "XLOC\_051801"; transcript\_id "TCONS\_00085340"; exon\_number "2";  
oId "CUFF.92707.6"; tss\_id "TSS64956";

chr8 Cufflinks exon23120461 23120862 . + . gene\_id "XLOC\_051804"; transcript\_id "TCONS\_00085344"; exon\_number "1";  
oId "CUFF.92717.1"; tss\_id "TSS64960";

chr8 Cufflinks exon23121109 23121714 . + . gene\_id "XLOC\_051804"; transcript\_id "TCONS\_00085344"; exon\_number "2";  
oId "CUFF.92717.1"; tss\_id "TSS64960";

chr8 Cufflinks exon23315252 23316867 . + . gene\_id "XLOC\_051806"; transcript\_id "TCONS\_00085347"; exon\_number "1";  
oId "CUFF.92736.1"; tss\_id "TSS64962";

chr8 Cufflinks exon23336717 23340753 . + . gene\_id "XLOC\_051806"; transcript\_id "TCONS\_00085347"; exon\_number "2";  
oId "CUFF.92736.1"; tss\_id "TSS64962";

chr8 Cufflinks exon23344453 23344672 . + . gene\_id "XLOC\_051806"; transcript\_id "TCONS\_00085347"; exon\_number "3";  
oId "CUFF.92736.1"; tss\_id "TSS64962";

chr8 Cufflinks exon 23315252 23316867 . + . gene\_id "XLOC\_051806"; transcript\_id "TCONS\_00085349";

exon\_number "1"; oId "CUFF.92736.3"; tss\_id "TSS64962";  
 chr8 Cufflinks exon 23336717 23340753 . + . gene\_id "XLOC\_051806"; transcript\_id "TCONS\_00085349";  
 exon\_number "2"; oId "CUFF.92736.3"; tss\_id "TSS64962";  
 chr8 Cufflinks exon 23349685 23349878 . + . gene\_id "XLOC\_051806"; transcript\_id "TCONS\_00085349";  
 exon\_number "3"; oId "CUFF.92736.3"; tss\_id "TSS64962";  
 chr8 Cufflinks exon 23351082 23352371 . + . gene\_id "XLOC\_051806"; transcript\_id "TCONS\_00085349";  
 exon\_number "4"; oId "CUFF.92736.3"; tss\_id "TSS64962";  
 chr8 Cufflinks exon 23315252 23316867 . + . gene\_id "XLOC\_051806"; transcript\_id "TCONS\_00085348";  
 exon\_number "1"; oId "CUFF.92736.2"; tss\_id "TSS64962";  
 chr8 Cufflinks exon 23336717 23340753 . + . gene\_id "XLOC\_051806"; transcript\_id "TCONS\_00085348";  
 exon\_number "2"; oId "CUFF.92736.2"; tss\_id "TSS64962";  
 chr8 Cufflinks exon 23351082 23352371 . + . gene\_id "XLOC\_051806"; transcript\_id "TCONS\_00085348";  
 exon\_number "3"; oId "CUFF.92736.2"; tss\_id "TSS64962";  
 chr8 Cufflinks exon 23315269 23316867 . + . gene\_id "XLOC\_051806"; transcript\_id "TCONS\_00085350";  
 exon\_number "1"; oId "CUFF.92736.4"; tss\_id "TSS64962";  
 chr8 Cufflinks exon 23336717 23340753 . + . gene\_id "XLOC\_051806"; transcript\_id "TCONS\_00085350";  
 exon\_number "2"; oId "CUFF.92736.4"; tss\_id "TSS64962";  
 chr8 Cufflinks exon 23341983 23342262 . + . gene\_id "XLOC\_051806"; transcript\_id "TCONS\_00085350";  
 exon\_number "3"; oId "CUFF.92736.4"; tss\_id "TSS64962";  
 chr8 Cufflinks exon 23315272 23316867 . + . gene\_id "XLOC\_051806"; transcript\_id "TCONS\_00085351";  
 exon\_number "1"; oId "CUFF.92736.6"; tss\_id "TSS64962";  
 chr8 Cufflinks exon 23336717 23340753 . + . gene\_id "XLOC\_051806"; transcript\_id "TCONS\_00085351";  
 exon\_number "2"; oId "CUFF.92736.6"; tss\_id "TSS64962";  
 chr8 Cufflinks exon 23343142 23343218 . + . gene\_id "XLOC\_051806"; transcript\_id "TCONS\_00085351";  
 exon\_number "3"; oId "CUFF.92736.6"; tss\_id "TSS64962";  
 chr8 Cufflinks exon 23315272 23315502 . + . gene\_id "XLOC\_051806"; transcript\_id "TCONS\_00085354";  
 exon\_number "1"; oId "CUFF.92736.8"; tss\_id "TSS64962";  
 chr8 Cufflinks exon 23316727 23316867 . + . gene\_id "XLOC\_051806"; transcript\_id "TCONS\_00085354";  
 exon\_number "2"; oId "CUFF.92736.8"; tss\_id "TSS64962";  
 chr8 Cufflinks exon 23336717 23340753 . + . gene\_id "XLOC\_051806"; transcript\_id "TCONS\_00085354";  
 exon\_number "3"; oId "CUFF.92736.8"; tss\_id "TSS64962";  
 chr8 Cufflinks exon 23351082 23352371 . + . gene\_id "XLOC\_051806"; transcript\_id "TCONS\_00085354";  
 exon\_number "4"; oId "CUFF.92736.8"; tss\_id "TSS64962";  
 chr8 Cufflinks exon 23315272 23315502 . + . gene\_id "XLOC\_051806"; transcript\_id "TCONS\_00085353";  
 exon\_number "1"; oId "CUFF.92736.7"; tss\_id "TSS64962";  
 chr8 Cufflinks exon 23316727 23316867 . + . gene\_id "XLOC\_051806"; transcript\_id "TCONS\_00085353";  
 exon\_number "2"; oId "CUFF.92736.7"; tss\_id "TSS64962";  
 chr8 Cufflinks exon23336717 23340753 . + . gene\_id "XLOC\_051806"; transcript\_id "TCONS\_00085353"; exon\_number "3";  
 oId "CUFF.92736.7"; tss\_id "TSS64962";  
 chr8 Cufflinks exon23349685 23349878 . + . gene\_id "XLOC\_051806"; transcript\_id "TCONS\_00085353"; exon\_number "4";  
 oId "CUFF.92736.7"; tss\_id "TSS64962";  
 chr8 Cufflinks exon23351082 23352371 . + . gene\_id "XLOC\_051806"; transcript\_id "TCONS\_00085353"; exon\_number "5";  
 oId "CUFF.92736.7"; tss\_id "TSS64962";

|                                        |          |   |   |   |                                                                         |
|----------------------------------------|----------|---|---|---|-------------------------------------------------------------------------|
| chr8 Cufflinks exon23315272            | 23316867 | . | + | . | gene_id "XLOC_051806"; transcript_id "TCONS_00085352"; exon_number "1"; |
| oId "CUFF.92736.5"; tss_id "TSS64962"; |          |   |   |   |                                                                         |
| chr8 Cufflinks exon23336717            | 23340696 | . | + | . | gene_id "XLOC_051806"; transcript_id "TCONS_00085352"; exon_number "2"; |
| oId "CUFF.92736.5"; tss_id "TSS64962"; |          |   |   |   |                                                                         |
| chr8 Cufflinks exon23349685            | 23349878 | . | + | . | gene_id "XLOC_051806"; transcript_id "TCONS_00085352"; exon_number "3"; |
| oId "CUFF.92736.5"; tss_id "TSS64962"; |          |   |   |   |                                                                         |
| chr8 Cufflinks exon23351082            | 23352371 | . | + | . | gene_id "XLOC_051806"; transcript_id "TCONS_00085352"; exon_number "4"; |
| oId "CUFF.92736.5"; tss_id "TSS64962"; |          |   |   |   |                                                                         |
| chr8 Cufflinks exon29926649            | 29926681 | . | + | . | gene_id "XLOC_051864"; transcript_id "TCONS_00085453"; exon_number "1"; |
| oId "CUFF.92941.1"; tss_id "TSS65036"; |          |   |   |   |                                                                         |
| chr8 Cufflinks exon30210762            | 30211054 | . | + | . | gene_id "XLOC_051864"; transcript_id "TCONS_00085453"; exon_number "2"; |
| oId "CUFF.92941.1"; tss_id "TSS65036"; |          |   |   |   |                                                                         |
| chr8 Cufflinks exon41423961            | 41424442 | . | + | . | gene_id "XLOC_051918"; transcript_id "TCONS_00085535"; exon_number "1"; |
| oId "CUFF.93155.1"; tss_id "TSS65102"; |          |   |   |   |                                                                         |
| chr8 Cufflinks exon41424632            | 41425829 | . | + | . | gene_id "XLOC_051918"; transcript_id "TCONS_00085535"; exon_number "2"; |
| oId "CUFF.93155.1"; tss_id "TSS65102"; |          |   |   |   |                                                                         |
| chr8 Cufflinks exon53673352            | 53673462 | . | + | . | gene_id "XLOC_051964"; transcript_id "TCONS_00085606"; exon_number "1"; |
| oId "CUFF.93329.3"; tss_id "TSS65152"; |          |   |   |   |                                                                         |
| chr8 Cufflinks exon53680625            | 53681998 | . | + | . | gene_id "XLOC_051964"; transcript_id "TCONS_00085606"; exon_number "2"; |
| oId "CUFF.93329.3"; tss_id "TSS65152"; |          |   |   |   |                                                                         |
| chr8 Cufflinks exon53682533            | 53682656 | . | + | . | gene_id "XLOC_051964"; transcript_id "TCONS_00085606"; exon_number "3"; |
| oId "CUFF.93329.3"; tss_id "TSS65152"; |          |   |   |   |                                                                         |
| chr8 Cufflinks exon53689007            | 53689150 | . | + | . | gene_id "XLOC_051964"; transcript_id "TCONS_00085606"; exon_number "4"; |
| oId "CUFF.93329.3"; tss_id "TSS65152"; |          |   |   |   |                                                                         |
| chr8 Cufflinks exon53689426            | 53694445 | . | + | . | gene_id "XLOC_051964"; transcript_id "TCONS_00085606"; exon_number "5"; |
| oId "CUFF.93329.3"; tss_id "TSS65152"; |          |   |   |   |                                                                         |
| chr8 Cufflinks exon53680347            | 53681998 | . | + | . | gene_id "XLOC_051964"; transcript_id "TCONS_00085607"; exon_number "1"; |
| oId "CUFF.93329.5"; tss_id "TSS65153"; |          |   |   |   |                                                                         |
| chr8 Cufflinks exon53682533            | 53682655 | . | + | . | gene_id "XLOC_051964"; transcript_id "TCONS_00085607"; exon_number "2"; |
| oId "CUFF.93329.5"; tss_id "TSS65153"; |          |   |   |   |                                                                         |
| chr8 Cufflinks exon53689006            | 53694445 | . | + | . | gene_id "XLOC_051964"; transcript_id "TCONS_00085607"; exon_number "3"; |
| oId "CUFF.93329.5"; tss_id "TSS65153"; |          |   |   |   |                                                                         |
| chr8 Cufflinks exon56768328            | 56768640 | . | + | . | gene_id "XLOC_051983"; transcript_id "TCONS_00085631"; exon_number "1"; |
| oId "CUFF.93398.1"; tss_id "TSS65173"; |          |   |   |   |                                                                         |
| chr8 Cufflinks exon56815413            | 56815433 | . | + | . | gene_id "XLOC_051983"; transcript_id "TCONS_00085631"; exon_number "2"; |
| oId "CUFF.93398.1"; tss_id "TSS65173"; |          |   |   |   |                                                                         |
| chr8 Cufflinks exon58890917            | 58891043 | . | + | . | gene_id "XLOC_051994"; transcript_id "TCONS_00085646"; exon_number "1"; |
| oId "CUFF.93445.1"; tss_id "TSS65184"; |          |   |   |   |                                                                         |
| chr8 Cufflinks exon58893453            | 58893573 | . | + | . | gene_id "XLOC_051994"; transcript_id "TCONS_00085646"; exon_number "2"; |
| oId "CUFF.93445.1"; tss_id "TSS65184"; |          |   |   |   |                                                                         |
| chr8 Cufflinks exon58894825            | 58896685 | . | + | . | gene_id "XLOC_051994"; transcript_id "TCONS_00085646"; exon_number "3"; |
| oId "CUFF.93445.1"; tss_id "TSS65184"; |          |   |   |   |                                                                         |
| chr8 Cufflinks exon60032458            | 60032630 | . | + | . | gene_id "XLOC_052001"; transcript_id "TCONS_00085655"; exon_number "1"; |

|                                        |   |   |   |                                                                         |  |
|----------------------------------------|---|---|---|-------------------------------------------------------------------------|--|
| oId "CUFF.93459.1"; tss_id "TSS65191"; |   |   |   |                                                                         |  |
| chr8 Cufflinks exon60032895 60033640   | . | + | . | gene_id "XLOC_052001"; transcript_id "TCONS_00085655"; exon_number "2"; |  |
| oId "CUFF.93459.1"; tss_id "TSS65191"; |   |   |   |                                                                         |  |
| chr8 Cufflinks exon60209776 60209933   | . | + | . | gene_id "XLOC_052005"; transcript_id "TCONS_00085659"; exon_number "1"; |  |
| oId "CUFF.93488.1"; tss_id "TSS65195"; |   |   |   |                                                                         |  |
| chr8 Cufflinks exon60210123 60211250   | . | + | . | gene_id "XLOC_052005"; transcript_id "TCONS_00085659"; exon_number "2"; |  |
| oId "CUFF.93488.1"; tss_id "TSS65195"; |   |   |   |                                                                         |  |
| chr8 Cufflinks exon60209776 60209933   | . | + | . | gene_id "XLOC_052005"; transcript_id "TCONS_00085660"; exon_number "1"; |  |
| oId "CUFF.93488.2"; tss_id "TSS65195"; |   |   |   |                                                                         |  |
| chr8 Cufflinks exon60210123 60210229   | . | + | . | gene_id "XLOC_052005"; transcript_id "TCONS_00085660"; exon_number "2"; |  |
| oId "CUFF.93488.2"; tss_id "TSS65195"; |   |   |   |                                                                         |  |
| chr8 Cufflinks exon60302680 60304877   | . | + | . | gene_id "XLOC_052005"; transcript_id "TCONS_00085660"; exon_number "3"; |  |
| oId "CUFF.93488.2"; tss_id "TSS65195"; |   |   |   |                                                                         |  |
| chr8 Cufflinks exon67025274 67025831   | . | + | . | gene_id "XLOC_052052"; transcript_id "TCONS_00085721"; exon_number "1"; |  |
| oId "CUFF.93636.1"; tss_id "TSS65249"; |   |   |   |                                                                         |  |
| chr8 Cufflinks exon67026797 67027017   | . | + | . | gene_id "XLOC_052052"; transcript_id "TCONS_00085721"; exon_number "2"; |  |
| oId "CUFF.93636.1"; tss_id "TSS65249"; |   |   |   |                                                                         |  |
| chr8 Cufflinks exon67038781 67038803   | . | + | . | gene_id "XLOC_052052"; transcript_id "TCONS_00085721"; exon_number "3"; |  |
| oId "CUFF.93636.1"; tss_id "TSS65249"; |   |   |   |                                                                         |  |
| chr8 Cufflinks exon71869466 71869483   | . | + | . | gene_id "XLOC_052087"; transcript_id "TCONS_00085791"; exon_number "1"; |  |
| oId "CUFF.93768.1"; tss_id "TSS65301"; |   |   |   |                                                                         |  |
| chr8 Cufflinks exon71977592 71978036   | . | + | . | gene_id "XLOC_052087"; transcript_id "TCONS_00085791"; exon_number "2"; |  |
| oId "CUFF.93768.1"; tss_id "TSS65301"; |   |   |   |                                                                         |  |
| chr8 Cufflinks exon73961062 73961978   | . | + | . | gene_id "XLOC_052101"; transcript_id "TCONS_00085807"; exon_number "1"; |  |
| oId "CUFF.93791.1"; tss_id "TSS65315"; |   |   |   |                                                                         |  |
| chr8 Cufflinks exon73962331 73967838   | . | + | . | gene_id "XLOC_052101"; transcript_id "TCONS_00085807"; exon_number "2"; |  |
| oId "CUFF.93791.1"; tss_id "TSS65315"; |   |   |   |                                                                         |  |
| chr8 Cufflinks exon73975170 73981422   | . | + | . | gene_id "XLOC_052101"; transcript_id "TCONS_00085807"; exon_number "3"; |  |
| oId "CUFF.93791.1"; tss_id "TSS65315"; |   |   |   |                                                                         |  |
| chr8 Cufflinks exon74895849 74896272   | . | + | . | gene_id "XLOC_052105"; transcript_id "TCONS_00085814"; exon_number "1"; |  |
| oId "CUFF.93828.1"; tss_id "TSS65320"; |   |   |   |                                                                         |  |
| chr8 Cufflinks exon74896653 74897531   | . | + | . | gene_id "XLOC_052105"; transcript_id "TCONS_00085814"; exon_number "2"; |  |
| oId "CUFF.93828.1"; tss_id "TSS65320"; |   |   |   |                                                                         |  |
| chr8 Cufflinks exon86132730 86133354   | . | + | . | gene_id "XLOC_052187"; transcript_id "TCONS_00085923"; exon_number "1"; |  |
| oId "CUFF.94068.3"; tss_id "TSS65412"; |   |   |   |                                                                         |  |
| chr8 Cufflinks exon86142314 86142429   | . | + | . | gene_id "XLOC_052187"; transcript_id "TCONS_00085923"; exon_number "2"; |  |
| oId "CUFF.94068.3"; tss_id "TSS65412"; |   |   |   |                                                                         |  |
| chr8 Cufflinks exon86142522 86142940   | . | + | . | gene_id "XLOC_052187"; transcript_id "TCONS_00085923"; exon_number "3"; |  |
| oId "CUFF.94068.3"; tss_id "TSS65412"; |   |   |   |                                                                         |  |
| chr8 Cufflinks exon93681016 93681195   | . | + | . | gene_id "XLOC_052228"; transcript_id "TCONS_00085980"; exon_number "1"; |  |
| oId "CUFF.94221.3"; tss_id "TSS65459"; |   |   |   |                                                                         |  |
| chr8 Cufflinks exon93694166 93695628   | . | + | . | gene_id "XLOC_052228"; transcript_id "TCONS_00085980"; exon_number "2"; |  |
| oId "CUFF.94221.3"; tss_id "TSS65459"; |   |   |   |                                                                         |  |

|                                        |          |   |   |   |                                                                         |
|----------------------------------------|----------|---|---|---|-------------------------------------------------------------------------|
| chr8 Cufflinks exon93681016            | 93681195 | . | + | . | gene_id "XLOC_052228"; transcript_id "TCONS_00085979"; exon_number "1"; |
| oId "CUFF.94221.2"; tss_id "TSS65459"; |          |   |   |   |                                                                         |
| chr8 Cufflinks exon93689817            | 93690003 | . | + | . | gene_id "XLOC_052228"; transcript_id "TCONS_00085979"; exon_number "2"; |
| oId "CUFF.94221.2"; tss_id "TSS65459"; |          |   |   |   |                                                                         |
| chr8 Cufflinks exon93691037            | 93691338 | . | + | . | gene_id "XLOC_052228"; transcript_id "TCONS_00085979"; exon_number "3"; |
| oId "CUFF.94221.2"; tss_id "TSS65459"; |          |   |   |   |                                                                         |
| chr8 Cufflinks exon93694166            | 93695628 | . | + | . | gene_id "XLOC_052228"; transcript_id "TCONS_00085979"; exon_number "4"; |
| oId "CUFF.94221.2"; tss_id "TSS65459"; |          |   |   |   |                                                                         |
| chr8 Cufflinks exon93681016            | 93681195 | . | + | . | gene_id "XLOC_052228"; transcript_id "TCONS_00085978"; exon_number "1"; |
| oId "CUFF.94221.1"; tss_id "TSS65459"; |          |   |   |   |                                                                         |
| chr8 Cufflinks exon93691037            | 93691338 | . | + | . | gene_id "XLOC_052228"; transcript_id "TCONS_00085978"; exon_number "2"; |
| oId "CUFF.94221.1"; tss_id "TSS65459"; |          |   |   |   |                                                                         |
| chr8 Cufflinks exon93694166            | 93695628 | . | + | . | gene_id "XLOC_052228"; transcript_id "TCONS_00085978"; exon_number "3"; |
| oId "CUFF.94221.1"; tss_id "TSS65459"; |          |   |   |   |                                                                         |
| chr8 Cufflinks exon93689586            | 93690003 | . | + | . | gene_id "XLOC_052228"; transcript_id "TCONS_00085981"; exon_number "1"; |
| oId "CUFF.94221.4"; tss_id "TSS65460"; |          |   |   |   |                                                                         |
| chr8 Cufflinks exon93691037            | 93691338 | . | + | . | gene_id "XLOC_052228"; transcript_id "TCONS_00085981"; exon_number "2"; |
| oId "CUFF.94221.4"; tss_id "TSS65460"; |          |   |   |   |                                                                         |
| chr8 Cufflinks exon93694166            | 93695628 | . | + | . | gene_id "XLOC_052228"; transcript_id "TCONS_00085981"; exon_number "3"; |
| oId "CUFF.94221.4"; tss_id "TSS65460"; |          |   |   |   |                                                                         |
| chr8 Cufflinks exon93711313            | 93711428 | . | + | . | gene_id "XLOC_052231"; transcript_id "TCONS_00085984"; exon_number "1"; |
| oId "CUFF.94229.1"; tss_id "TSS65463"; |          |   |   |   |                                                                         |
| chr8 Cufflinks exon93719621            | 93719827 | . | + | . | gene_id "XLOC_052231"; transcript_id "TCONS_00085984"; exon_number "2"; |
| oId "CUFF.94229.1"; tss_id "TSS65463"; |          |   |   |   |                                                                         |
| chr8 Cufflinks exon95565938            | 95566135 | . | + | . | gene_id "XLOC_052241"; transcript_id "TCONS_00086002"; exon_number "1"; |
| oId "CUFF.94291.2"; tss_id "TSS65473"; |          |   |   |   |                                                                         |
| chr8 Cufflinks exon95582338            | 95582986 | . | + | . | gene_id "XLOC_052241"; transcript_id "TCONS_00086002"; exon_number "2"; |
| oId "CUFF.94291.2"; tss_id "TSS65473"; |          |   |   |   |                                                                         |
| chr8 Cufflinks exon95565938            | 95566135 | . | + | . | gene_id "XLOC_052241"; transcript_id "TCONS_00086001"; exon_number "1"; |
| oId "CUFF.94291.1"; tss_id "TSS65473"; |          |   |   |   |                                                                         |
| chr8 Cufflinks exon95567395            | 95567489 | . | + | . | gene_id "XLOC_052241"; transcript_id "TCONS_00086001"; exon_number "2"; |
| oId "CUFF.94291.1"; tss_id "TSS65473"; |          |   |   |   |                                                                         |
| chr8 Cufflinks exon95580371            | 95582986 | . | + | . | gene_id "XLOC_052241"; transcript_id "TCONS_00086001"; exon_number "3"; |
| oId "CUFF.94291.1"; tss_id "TSS65473"; |          |   |   |   |                                                                         |
| chr8 Cufflinks exon95565939            | 95566135 | . | + | . | gene_id "XLOC_052241"; transcript_id "TCONS_00086005"; exon_number "1"; |
| oId "CUFF.94291.6"; tss_id "TSS65473"; |          |   |   |   |                                                                         |
| chr8 Cufflinks exon95567395            | 95567494 | . | + | . | gene_id "XLOC_052241"; transcript_id "TCONS_00086005"; exon_number "2"; |
| oId "CUFF.94291.6"; tss_id "TSS65473"; |          |   |   |   |                                                                         |
| chr8 Cufflinks exon95580371            | 95582986 | . | + | . | gene_id "XLOC_052241"; transcript_id "TCONS_00086005"; exon_number "3"; |
| oId "CUFF.94291.6"; tss_id "TSS65473"; |          |   |   |   |                                                                         |
| chr8 Cufflinks exon95565939            | 95566135 | . | + | . | gene_id "XLOC_052241"; transcript_id "TCONS_00086004"; exon_number "1"; |
| oId "CUFF.94291.5"; tss_id "TSS65473"; |          |   |   |   |                                                                         |
| chr8 Cufflinks exon95580371            | 95580763 | . | + | . | gene_id "XLOC_052241"; transcript_id "TCONS_00086004"; exon_number "2"; |

|                                        |   |   |   |                                                                         |  |
|----------------------------------------|---|---|---|-------------------------------------------------------------------------|--|
| oId "CUFF.94291.5"; tss_id "TSS65473"; |   |   |   |                                                                         |  |
| chr8 Cufflinks exon95582338 95582986   | . | + | . | gene_id "XLOC_052241"; transcript_id "TCONS_00086004"; exon_number "3"; |  |
| oId "CUFF.94291.5"; tss_id "TSS65473"; |   |   |   |                                                                         |  |
| chr8 Cufflinks exon95565939 95566135   | . | + | . | gene_id "XLOC_052241"; transcript_id "TCONS_00086003"; exon_number "1"; |  |
| oId "CUFF.94291.4"; tss_id "TSS65473"; |   |   |   |                                                                         |  |
| chr8 Cufflinks exon95580277 95582986   | . | + | . | gene_id "XLOC_052241"; transcript_id "TCONS_00086003"; exon_number "2"; |  |
| oId "CUFF.94291.4"; tss_id "TSS65473"; |   |   |   |                                                                         |  |
| chr8 Cufflinks exon95565950 95566135   | . | + | . | gene_id "XLOC_052241"; transcript_id "TCONS_00086006"; exon_number "1"; |  |
| oId "CUFF.94291.7"; tss_id "TSS65473"; |   |   |   |                                                                         |  |
| chr8 Cufflinks exon95580371 95582986   | . | + | . | gene_id "XLOC_052241"; transcript_id "TCONS_00086006"; exon_number "2"; |  |
| oId "CUFF.94291.7"; tss_id "TSS65473"; |   |   |   |                                                                         |  |
| chr8 Cufflinks exon95565954 95566135   | . | + | . | gene_id "XLOC_052241"; transcript_id "TCONS_00086007"; exon_number "1"; |  |
| oId "CUFF.94291.8"; tss_id "TSS65473"; |   |   |   |                                                                         |  |
| chr8 Cufflinks exon95567395 95567489   | . | + | . | gene_id "XLOC_052241"; transcript_id "TCONS_00086007"; exon_number "2"; |  |
| oId "CUFF.94291.8"; tss_id "TSS65473"; |   |   |   |                                                                         |  |
| chr8 Cufflinks exon95580371 95580763   | . | + | . | gene_id "XLOC_052241"; transcript_id "TCONS_00086007"; exon_number "3"; |  |
| oId "CUFF.94291.8"; tss_id "TSS65473"; |   |   |   |                                                                         |  |
| chr8 Cufflinks exon95582338 95582986   | . | + | . | gene_id "XLOC_052241"; transcript_id "TCONS_00086007"; exon_number "4"; |  |
| oId "CUFF.94291.8"; tss_id "TSS65473"; |   |   |   |                                                                         |  |
| chr8 Cufflinks exon103251679 103251928 | . | + | . | gene_id "XLOC_052306"; transcript_id "TCONS_00086104"; exon_number "1"; |  |
| oId "CUFF.94540.1"; tss_id "TSS65549"; |   |   |   |                                                                         |  |
| chr8 Cufflinks exon103256233 103256349 | . | + | . | gene_id "XLOC_052306"; transcript_id "TCONS_00086104"; exon_number "2"; |  |
| oId "CUFF.94540.1"; tss_id "TSS65549"; |   |   |   |                                                                         |  |
| chr8 Cufflinks exon103264027 103264402 | . | + | . | gene_id "XLOC_052306"; transcript_id "TCONS_00086104"; exon_number "3"; |  |
| oId "CUFF.94540.1"; tss_id "TSS65549"; |   |   |   |                                                                         |  |
| chr8 Cufflinks exon103809848 103809897 | . | + | . | gene_id "XLOC_052309"; transcript_id "TCONS_00086111"; exon_number "1"; |  |
| oId "CUFF.94559.1"; tss_id "TSS65553"; |   |   |   |                                                                         |  |
| chr8 Cufflinks exon103821162 103822389 | . | + | . | gene_id "XLOC_052309"; transcript_id "TCONS_00086111"; exon_number "2"; |  |
| oId "CUFF.94559.1"; tss_id "TSS65553"; |   |   |   |                                                                         |  |
| chr8 Cufflinks exon103822502 103823762 | . | + | . | gene_id "XLOC_052309"; transcript_id "TCONS_00086111"; exon_number "3"; |  |
| oId "CUFF.94559.1"; tss_id "TSS65553"; |   |   |   |                                                                         |  |
| chr8 Cufflinks exon103818639 103820781 | . | + | . | gene_id "XLOC_052309"; transcript_id "TCONS_00086113"; exon_number "1"; |  |
| oId "CUFF.94559.3"; tss_id "TSS65554"; |   |   |   |                                                                         |  |
| chr8 Cufflinks exon103821162 103822389 | . | + | . | gene_id "XLOC_052309"; transcript_id "TCONS_00086113"; exon_number "2"; |  |
| oId "CUFF.94559.3"; tss_id "TSS65554"; |   |   |   |                                                                         |  |
| chr8 Cufflinks exon103822502 103823762 | . | + | . | gene_id "XLOC_052309"; transcript_id "TCONS_00086113"; exon_number "3"; |  |
| oId "CUFF.94559.3"; tss_id "TSS65554"; |   |   |   |                                                                         |  |
| chr8 Cufflinks exon103818639 103821027 | . | + | . | gene_id "XLOC_052309"; transcript_id "TCONS_00086112"; exon_number "1"; |  |
| oId "CUFF.94559.2"; tss_id "TSS65554"; |   |   |   |                                                                         |  |
| chr8 Cufflinks exon103821162 103822389 | . | + | . | gene_id "XLOC_052309"; transcript_id "TCONS_00086112"; exon_number "2"; |  |
| oId "CUFF.94559.2"; tss_id "TSS65554"; |   |   |   |                                                                         |  |
| chr8 Cufflinks exon103822502 103823762 | . | + | . | gene_id "XLOC_052309"; transcript_id "TCONS_00086112"; exon_number "3"; |  |
| oId "CUFF.94559.2"; tss_id "TSS65554"; |   |   |   |                                                                         |  |



chr8 Cufflinks exon103818862 103818879 . + . gene\_id "XLOC\_052309"; transcript\_id "TCONS\_00086114"; exon\_number "1";  
oId "CUFF.94559.4"; tss\_id "TSS65555";

chr8 Cufflinks exon103821162 103822389 . + . gene\_id "XLOC\_052309"; transcript\_id "TCONS\_00086114"; exon\_number "2";  
oId "CUFF.94559.4"; tss\_id "TSS65555";

chr8 Cufflinks exon103822502 103823762 . + . gene\_id "XLOC\_052309"; transcript\_id "TCONS\_00086114"; exon\_number "3";  
oId "CUFF.94559.4"; tss\_id "TSS65555";

chr8 Cufflinks exon103819238 103819793 . + . gene\_id "XLOC\_052309"; transcript\_id "TCONS\_00086115"; exon\_number "1";  
oId "CUFF.94559.5"; tss\_id "TSS65556";

chr8 Cufflinks exon103821162 103822389 . + . gene\_id "XLOC\_052309"; transcript\_id "TCONS\_00086115"; exon\_number "2";  
oId "CUFF.94559.5"; tss\_id "TSS65556";

chr8 Cufflinks exon103822502 103823762 . + . gene\_id "XLOC\_052309"; transcript\_id "TCONS\_00086115"; exon\_number "3";  
oId "CUFF.94559.5"; tss\_id "TSS65556";

chr8 Cufflinks exon103876499 103876851 . + . gene\_id "XLOC\_052310"; transcript\_id "TCONS\_00086117"; exon\_number "1";  
oId "CUFF.94563.2"; tss\_id "TSS65557";

chr8 Cufflinks exon103892123 103892286 . + . gene\_id "XLOC\_052310"; transcript\_id "TCONS\_00086117"; exon\_number "2";  
oId "CUFF.94563.2"; tss\_id "TSS65557";

chr8 Cufflinks exon103989815 103990104 . + . gene\_id "XLOC\_052310"; transcript\_id "TCONS\_00086117"; exon\_number "3";  
oId "CUFF.94563.2"; tss\_id "TSS65557";

chr8 Cufflinks exon103876499 103876851 . + . gene\_id "XLOC\_052310"; transcript\_id "TCONS\_00086116"; exon\_number "1";  
oId "CUFF.94563.1"; tss\_id "TSS65557";

chr8 Cufflinks exon103892123 103892286 . + . gene\_id "XLOC\_052310"; transcript\_id "TCONS\_00086116"; exon\_number "2";  
oId "CUFF.94563.1"; tss\_id "TSS65557";

chr8 Cufflinks exon103979825 103979901 . + . gene\_id "XLOC\_052310"; transcript\_id "TCONS\_00086116"; exon\_number "3";  
oId "CUFF.94563.1"; tss\_id "TSS65557";

chr8 Cufflinks exon103989815 103990104 . + . gene\_id "XLOC\_052310"; transcript\_id "TCONS\_00086116"; exon\_number "4";  
oId "CUFF.94563.1"; tss\_id "TSS65557";

chr8 Cufflinks exon117892179 117892658 . + . gene\_id "XLOC\_052406"; transcript\_id "TCONS\_00086242"; exon\_number "1";  
oId "CUFF.94899.1"; tss\_id "TSS65666";

chr8 Cufflinks exon117897598 117897718 . + . gene\_id "XLOC\_052406"; transcript\_id "TCONS\_00086242"; exon\_number "2";  
oId "CUFF.94899.1"; tss\_id "TSS65666";

chr8 Cufflinks exon117960753 117960976 . + . gene\_id "XLOC\_052406"; transcript\_id "TCONS\_00086242"; exon\_number "3";  
oId "CUFF.94899.1"; tss\_id "TSS65666";

chr8 Cufflinks exon128806624 128806980 . + . gene\_id "XLOC\_052466"; transcript\_id "TCONS\_00086336"; exon\_number "1";  
oId "CUFF.95104.2"; tss\_id "TSS65745";

chr8 Cufflinks exon128902835 128903244 . + . gene\_id "XLOC\_052466"; transcript\_id "TCONS\_00086336"; exon\_number "2";  
oId "CUFF.95104.2"; tss\_id "TSS65745";

chr8 Cufflinks exon128951754 128951922 . + . gene\_id "XLOC\_052466"; transcript\_id "TCONS\_00086336"; exon\_number "3";  
oId "CUFF.95104.2"; tss\_id "TSS65745";

chr8 Cufflinks exon129001408 129001537 . + . gene\_id "XLOC\_052466"; transcript\_id "TCONS\_00086336"; exon\_number "4";  
oId "CUFF.95104.2"; tss\_id "TSS65745";

chr8 Cufflinks exon129082406 129082607 . + . gene\_id "XLOC\_052466"; transcript\_id "TCONS\_00086336"; exon\_number "5";  
oId "CUFF.95104.2"; tss\_id "TSS65745";

chr8 Cufflinks exon129108764 129108900 . + . gene\_id "XLOC\_052466"; transcript\_id "TCONS\_00086336"; exon\_number "6";

oId "CUFF.95104.2"; tss\_id "TSS65745";  
chr8 Cufflinks exon129113226 129113502 . + . gene\_id "XLOC\_052466"; transcript\_id "TCONS\_00086336"; exon\_number "7";  
oId "CUFF.95104.2"; tss\_id "TSS65745";  
chr8 Cufflinks exon128806624 128806980 . + . gene\_id "XLOC\_052466"; transcript\_id "TCONS\_00086335"; exon\_number "1";  
oId "CUFF.95104.1"; tss\_id "TSS65745";  
chr8 Cufflinks exon128902835 128903244 . + . gene\_id "XLOC\_052466"; transcript\_id "TCONS\_00086335"; exon\_number "2";  
oId "CUFF.95104.1"; tss\_id "TSS65745";  
chr8 Cufflinks exon128951754 128951922 . + . gene\_id "XLOC\_052466"; transcript\_id "TCONS\_00086335"; exon\_number "3";  
oId "CUFF.95104.1"; tss\_id "TSS65745";  
chr8 Cufflinks exon128996150 128996450 . + . gene\_id "XLOC\_052466"; transcript\_id "TCONS\_00086335"; exon\_number "4";  
oId "CUFF.95104.1"; tss\_id "TSS65745";  
chr8 Cufflinks exon129001408 129001537 . + . gene\_id "XLOC\_052466"; transcript\_id "TCONS\_00086335"; exon\_number "5";  
oId "CUFF.95104.1"; tss\_id "TSS65745";  
chr8 Cufflinks exon129082406 129082518 . + . gene\_id "XLOC\_052466"; transcript\_id "TCONS\_00086335"; exon\_number "6";  
oId "CUFF.95104.1"; tss\_id "TSS65745";  
chr8 Cufflinks exon129108764 129108900 . + . gene\_id "XLOC\_052466"; transcript\_id "TCONS\_00086335"; exon\_number "7";  
oId "CUFF.95104.1"; tss\_id "TSS65745";  
chr8 Cufflinks exon129113226 129113502 . + . gene\_id "XLOC\_052466"; transcript\_id "TCONS\_00086335"; exon\_number "8";  
oId "CUFF.95104.1"; tss\_id "TSS65745";  
chr8 Cufflinks exon128806629 128806980 . + . gene\_id "XLOC\_052466"; transcript\_id "TCONS\_00086339"; exon\_number "1";  
oId "CUFF.95104.5"; tss\_id "TSS65745";  
chr8 Cufflinks exon128902835 128903244 . + . gene\_id "XLOC\_052466"; transcript\_id "TCONS\_00086339"; exon\_number "2";  
oId "CUFF.95104.5"; tss\_id "TSS65745";  
chr8 Cufflinks exon128951754 128951922 . + . gene\_id "XLOC\_052466"; transcript\_id "TCONS\_00086339"; exon\_number "3";  
oId "CUFF.95104.5"; tss\_id "TSS65745";  
chr8 Cufflinks exon129001408 129001537 . + . gene\_id "XLOC\_052466"; transcript\_id "TCONS\_00086339"; exon\_number "4";  
oId "CUFF.95104.5"; tss\_id "TSS65745";  
chr8 Cufflinks exon129021836 129021964 . + . gene\_id "XLOC\_052466"; transcript\_id "TCONS\_00086339"; exon\_number "5";  
oId "CUFF.95104.5"; tss\_id "TSS65745";  
chr8 Cufflinks exon129022564 129022690 . + . gene\_id "XLOC\_052466"; transcript\_id "TCONS\_00086339"; exon\_number "6";  
oId "CUFF.95104.5"; tss\_id "TSS65745";  
chr8 Cufflinks exon129108764 129108900 . + . gene\_id "XLOC\_052466"; transcript\_id "TCONS\_00086339"; exon\_number "7";  
oId "CUFF.95104.5"; tss\_id "TSS65745";  
chr8 Cufflinks exon129111616 129111819 . + . gene\_id "XLOC\_052466"; transcript\_id "TCONS\_00086339"; exon\_number "8";  
oId "CUFF.95104.5"; tss\_id "TSS65745";  
chr8 Cufflinks exon129113226 129113502 . + . gene\_id "XLOC\_052466"; transcript\_id "TCONS\_00086339"; exon\_number "9";  
oId "CUFF.95104.5"; tss\_id "TSS65745";  
chr8 Cufflinks exon128806629 128806980 . + . gene\_id "XLOC\_052466"; transcript\_id "TCONS\_00086338"; exon\_number "1";  
oId "CUFF.95104.4"; tss\_id "TSS65745";  
chr8 Cufflinks exon128902835 128903244 . + . gene\_id "XLOC\_052466"; transcript\_id "TCONS\_00086338"; exon\_number "2";  
oId "CUFF.95104.4"; tss\_id "TSS65745";  
chr8 Cufflinks exon128951754 128951922 . + . gene\_id "XLOC\_052466"; transcript\_id "TCONS\_00086338"; exon\_number "3";  
oId "CUFF.95104.4"; tss\_id "TSS65745";

|                                        |           |   |   |   |                                                                         |
|----------------------------------------|-----------|---|---|---|-------------------------------------------------------------------------|
| chr8 Cufflinks exon129001408           | 129001537 | . | + | . | gene_id "XLOC_052466"; transcript_id "TCONS_00086338"; exon_number "4"; |
| oId "CUFF.95104.4"; tss_id "TSS65745"; |           |   |   |   |                                                                         |
| chr8 Cufflinks exon129008807           | 129010605 | . | + | . | gene_id "XLOC_052466"; transcript_id "TCONS_00086338"; exon_number "5"; |
| oId "CUFF.95104.4"; tss_id "TSS65745"; |           |   |   |   |                                                                         |
| chr8 Cufflinks exon129021836           | 129021964 | . | + | . | gene_id "XLOC_052466"; transcript_id "TCONS_00086338"; exon_number "6"; |
| oId "CUFF.95104.4"; tss_id "TSS65745"; |           |   |   |   |                                                                         |
| chr8 Cufflinks exon129022564           | 129022690 | . | + | . | gene_id "XLOC_052466"; transcript_id "TCONS_00086338"; exon_number "7"; |
| oId "CUFF.95104.4"; tss_id "TSS65745"; |           |   |   |   |                                                                         |
| chr8 Cufflinks exon129108767           | 129108900 | . | + | . | gene_id "XLOC_052466"; transcript_id "TCONS_00086338"; exon_number "8"; |
| oId "CUFF.95104.4"; tss_id "TSS65745"; |           |   |   |   |                                                                         |
| chr8 Cufflinks exon129113226           | 129113502 | . | + | . | gene_id "XLOC_052466"; transcript_id "TCONS_00086338"; exon_number "9"; |
| oId "CUFF.95104.4"; tss_id "TSS65745"; |           |   |   |   |                                                                         |
| chr8 Cufflinks exon128806629           | 128806980 | . | + | . | gene_id "XLOC_052466"; transcript_id "TCONS_00086337"; exon_number "1"; |
| oId "CUFF.95104.3"; tss_id "TSS65745"; |           |   |   |   |                                                                         |
| chr8 Cufflinks exon128902835           | 128903244 | . | + | . | gene_id "XLOC_052466"; transcript_id "TCONS_00086337"; exon_number "2"; |
| oId "CUFF.95104.3"; tss_id "TSS65745"; |           |   |   |   |                                                                         |
| chr8 Cufflinks exon128951754           | 128951922 | . | + | . | gene_id "XLOC_052466"; transcript_id "TCONS_00086337"; exon_number "3"; |
| oId "CUFF.95104.3"; tss_id "TSS65745"; |           |   |   |   |                                                                         |
| chr8 Cufflinks exon128996150           | 128996450 | . | + | . | gene_id "XLOC_052466"; transcript_id "TCONS_00086337"; exon_number "4"; |
| oId "CUFF.95104.3"; tss_id "TSS65745"; |           |   |   |   |                                                                         |
| chr8 Cufflinks exon129001408           | 129001537 | . | + | . | gene_id "XLOC_052466"; transcript_id "TCONS_00086337"; exon_number "5"; |
| oId "CUFF.95104.3"; tss_id "TSS65745"; |           |   |   |   |                                                                         |
| chr8 Cufflinks exon129082406           | 129082607 | . | + | . | gene_id "XLOC_052466"; transcript_id "TCONS_00086337"; exon_number "6"; |
| oId "CUFF.95104.3"; tss_id "TSS65745"; |           |   |   |   |                                                                         |
| chr8 Cufflinks exon129108764           | 129108900 | . | + | . | gene_id "XLOC_052466"; transcript_id "TCONS_00086337"; exon_number "7"; |
| oId "CUFF.95104.3"; tss_id "TSS65745"; |           |   |   |   |                                                                         |
| chr8 Cufflinks exon129113226           | 129113502 | . | + | . | gene_id "XLOC_052466"; transcript_id "TCONS_00086337"; exon_number "8"; |
| oId "CUFF.95104.3"; tss_id "TSS65745"; |           |   |   |   |                                                                         |
| chr8 Cufflinks exon128806750           | 128806980 | . | + | . | gene_id "XLOC_052466"; transcript_id "TCONS_00086341"; exon_number "1"; |
| oId "CUFF.95104.7"; tss_id "TSS65746"; |           |   |   |   |                                                                         |
| chr8 Cufflinks exon128867401           | 128867565 | . | + | . | gene_id "XLOC_052466"; transcript_id "TCONS_00086341"; exon_number "2"; |
| oId "CUFF.95104.7"; tss_id "TSS65746"; |           |   |   |   |                                                                         |
| chr8 Cufflinks exon128902835           | 128903244 | . | + | . | gene_id "XLOC_052466"; transcript_id "TCONS_00086341"; exon_number "3"; |
| oId "CUFF.95104.7"; tss_id "TSS65746"; |           |   |   |   |                                                                         |
| chr8 Cufflinks exon128951754           | 128951922 | . | + | . | gene_id "XLOC_052466"; transcript_id "TCONS_00086341"; exon_number "4"; |
| oId "CUFF.95104.7"; tss_id "TSS65746"; |           |   |   |   |                                                                         |
| chr8 Cufflinks exon129001408           | 129001537 | . | + | . | gene_id "XLOC_052466"; transcript_id "TCONS_00086341"; exon_number "5"; |
| oId "CUFF.95104.7"; tss_id "TSS65746"; |           |   |   |   |                                                                         |
| chr8 Cufflinks exon129021836           | 129021964 | . | + | . | gene_id "XLOC_052466"; transcript_id "TCONS_00086341"; exon_number "6"; |
| oId "CUFF.95104.7"; tss_id "TSS65746"; |           |   |   |   |                                                                         |
| chr8 Cufflinks exon129022564           | 129022690 | . | + | . | gene_id "XLOC_052466"; transcript_id "TCONS_00086341"; exon_number "7"; |
| oId "CUFF.95104.7"; tss_id "TSS65746"; |           |   |   |   |                                                                         |
| chr8 Cufflinks exon129108764           | 129108902 | . | + | . | gene_id "XLOC_052466"; transcript_id "TCONS_00086341"; exon_number "8"; |

oId "CUFF.95104.7"; tss\_id "TSS65746";  
chr8 Cufflinks exon129113226 129113502 . + . gene\_id "XLOC\_052466"; transcript\_id "TCONS\_00086341"; exon\_number "9";  
oId "CUFF.95104.7"; tss\_id "TSS65746";  
chr8 Cufflinks exon128806750 128806980 . + . gene\_id "XLOC\_052466"; transcript\_id "TCONS\_00086340"; exon\_number "1";  
oId "CUFF.95104.6"; tss\_id "TSS65746";  
chr8 Cufflinks exon128902835 128903244 . + . gene\_id "XLOC\_052466"; transcript\_id "TCONS\_00086340"; exon\_number "2";  
oId "CUFF.95104.6"; tss\_id "TSS65746";  
chr8 Cufflinks exon128951754 128951922 . + . gene\_id "XLOC\_052466"; transcript\_id "TCONS\_00086340"; exon\_number "3";  
oId "CUFF.95104.6"; tss\_id "TSS65746";  
chr8 Cufflinks exon129001408 129001537 . + . gene\_id "XLOC\_052466"; transcript\_id "TCONS\_00086340"; exon\_number "4";  
oId "CUFF.95104.6"; tss\_id "TSS65746";  
chr8 Cufflinks exon129082406 129082518 . + . gene\_id "XLOC\_052466"; transcript\_id "TCONS\_00086340"; exon\_number "5";  
oId "CUFF.95104.6"; tss\_id "TSS65746";  
chr8 Cufflinks exon129108764 129108900 . + . gene\_id "XLOC\_052466"; transcript\_id "TCONS\_00086340"; exon\_number "6";  
oId "CUFF.95104.6"; tss\_id "TSS65746";  
chr8 Cufflinks exon129113226 129113502 . + . gene\_id "XLOC\_052466"; transcript\_id "TCONS\_00086340"; exon\_number "7";  
oId "CUFF.95104.6"; tss\_id "TSS65746";  
chr8 Cufflinks exon128806779 128806980 . + . gene\_id "XLOC\_052466"; transcript\_id "TCONS\_00086342"; exon\_number "1";  
oId "CUFF.95104.8"; tss\_id "TSS65746";  
chr8 Cufflinks exon128902835 128903244 . + . gene\_id "XLOC\_052466"; transcript\_id "TCONS\_00086342"; exon\_number "2";  
oId "CUFF.95104.8"; tss\_id "TSS65746";  
chr8 Cufflinks exon128944299 128944348 . + . gene\_id "XLOC\_052466"; transcript\_id "TCONS\_00086342"; exon\_number "3";  
oId "CUFF.95104.8"; tss\_id "TSS65746";  
chr8 Cufflinks exon128806779 128806980 . + . gene\_id "XLOC\_052466"; transcript\_id "TCONS\_00086343"; exon\_number "1";  
oId "CUFF.95104.9"; tss\_id "TSS65746";  
chr8 Cufflinks exon128902835 128903244 . + . gene\_id "XLOC\_052466"; transcript\_id "TCONS\_00086343"; exon\_number "2";  
oId "CUFF.95104.9"; tss\_id "TSS65746";  
chr8 Cufflinks exon128951754 128951922 . + . gene\_id "XLOC\_052466"; transcript\_id "TCONS\_00086343"; exon\_number "3";  
oId "CUFF.95104.9"; tss\_id "TSS65746";  
chr8 Cufflinks exon128996150 128996450 . + . gene\_id "XLOC\_052466"; transcript\_id "TCONS\_00086343"; exon\_number "4";  
oId "CUFF.95104.9"; tss\_id "TSS65746";  
chr8 Cufflinks exon129001408 129001537 . + . gene\_id "XLOC\_052466"; transcript\_id "TCONS\_00086343"; exon\_number "5";  
oId "CUFF.95104.9"; tss\_id "TSS65746";  
chr8 Cufflinks exon129082406 129082518 . + . gene\_id "XLOC\_052466"; transcript\_id "TCONS\_00086343"; exon\_number "6";  
oId "CUFF.95104.9"; tss\_id "TSS65746";  
chr8 Cufflinks exon129108764 129108900 . + . gene\_id "XLOC\_052466"; transcript\_id "TCONS\_00086343"; exon\_number "7";  
oId "CUFF.95104.9"; tss\_id "TSS65746";  
chr8 Cufflinks exon129111616 129111819 . + . gene\_id "XLOC\_052466"; transcript\_id "TCONS\_00086343"; exon\_number "8";  
oId "CUFF.95104.9"; tss\_id "TSS65746";  
chr8 Cufflinks exon129113226 129113502 . + . gene\_id "XLOC\_052466"; transcript\_id "TCONS\_00086343"; exon\_number "9";  
oId "CUFF.95104.9"; tss\_id "TSS65746";  
chr8 Cufflinks exon128807622 128807781 . + . gene\_id "XLOC\_052466"; transcript\_id "TCONS\_00086344"; exon\_number "1";  
oId "CUFF.95104.10"; tss\_id "TSS65747";

|                                         |           |   |   |   |                                                                          |
|-----------------------------------------|-----------|---|---|---|--------------------------------------------------------------------------|
| chr8 Cufflinks exon128808140            | 128808317 | . | + | . | gene_id "XLOC_052466"; transcript_id "TCONS_00086344"; exon_number "2";  |
| oId "CUFF.95104.10"; tss_id "TSS65747"; |           |   |   |   |                                                                          |
| chr8 Cufflinks exon128902835            | 128903244 | . | + | . | gene_id "XLOC_052466"; transcript_id "TCONS_00086344"; exon_number "3";  |
| oId "CUFF.95104.10"; tss_id "TSS65747"; |           |   |   |   |                                                                          |
| chr8 Cufflinks exon128944711            | 128944853 | . | + | . | gene_id "XLOC_052466"; transcript_id "TCONS_00086344"; exon_number "4";  |
| oId "CUFF.95104.10"; tss_id "TSS65747"; |           |   |   |   |                                                                          |
| chr8 Cufflinks exon128808241            | 128808254 | . | + | . | gene_id "XLOC_052466"; transcript_id "TCONS_00086345"; exon_number "1";  |
| oId "CUFF.95104.11"; tss_id "TSS65748"; |           |   |   |   |                                                                          |
| chr8 Cufflinks exon128902835            | 128903244 | . | + | . | gene_id "XLOC_052466"; transcript_id "TCONS_00086345"; exon_number "2";  |
| oId "CUFF.95104.11"; tss_id "TSS65748"; |           |   |   |   |                                                                          |
| chr8 Cufflinks exon128951754            | 128951922 | . | + | . | gene_id "XLOC_052466"; transcript_id "TCONS_00086345"; exon_number "3";  |
| oId "CUFF.95104.11"; tss_id "TSS65748"; |           |   |   |   |                                                                          |
| chr8 Cufflinks exon128996150            | 128996450 | . | + | . | gene_id "XLOC_052466"; transcript_id "TCONS_00086345"; exon_number "4";  |
| oId "CUFF.95104.11"; tss_id "TSS65748"; |           |   |   |   |                                                                          |
| chr8 Cufflinks exon129001408            | 129001537 | . | + | . | gene_id "XLOC_052466"; transcript_id "TCONS_00086345"; exon_number "5";  |
| oId "CUFF.95104.11"; tss_id "TSS65748"; |           |   |   |   |                                                                          |
| chr8 Cufflinks exon129021836            | 129021964 | . | + | . | gene_id "XLOC_052466"; transcript_id "TCONS_00086345"; exon_number "6";  |
| oId "CUFF.95104.11"; tss_id "TSS65748"; |           |   |   |   |                                                                          |
| chr8 Cufflinks exon129022564            | 129022690 | . | + | . | gene_id "XLOC_052466"; transcript_id "TCONS_00086345"; exon_number "7";  |
| oId "CUFF.95104.11"; tss_id "TSS65748"; |           |   |   |   |                                                                          |
| chr8 Cufflinks exon129082406            | 129082518 | . | + | . | gene_id "XLOC_052466"; transcript_id "TCONS_00086345"; exon_number "8";  |
| oId "CUFF.95104.11"; tss_id "TSS65748"; |           |   |   |   |                                                                          |
| chr8 Cufflinks exon129108764            | 129108900 | . | + | . | gene_id "XLOC_052466"; transcript_id "TCONS_00086345"; exon_number "9";  |
| oId "CUFF.95104.11"; tss_id "TSS65748"; |           |   |   |   |                                                                          |
| chr8 Cufflinks exon129113226            | 129113502 | . | + | . | gene_id "XLOC_052466"; transcript_id "TCONS_00086345"; exon_number "10"; |
| oId "CUFF.95104.11"; tss_id "TSS65748"; |           |   |   |   |                                                                          |
| chr8 Cufflinks exon130090077            | 130090312 | . | + | . | gene_id "XLOC_052470"; transcript_id "TCONS_00086349"; exon_number "1";  |
| oId "CUFF.95308.1"; tss_id "TSS65752";  |           |   |   |   |                                                                          |
| chr8 Cufflinks exon130116091            | 130121158 | . | + | . | gene_id "XLOC_052470"; transcript_id "TCONS_00086349"; exon_number "2";  |
| oId "CUFF.95308.1"; tss_id "TSS65752";  |           |   |   |   |                                                                          |
| chr8 Cufflinks exon130152302            | 130152403 | . | + | . | gene_id "XLOC_052472"; transcript_id "TCONS_00086353"; exon_number "1";  |
| oId "CUFF.95348.2"; tss_id "TSS65755";  |           |   |   |   |                                                                          |
| chr8 Cufflinks exon130236346            | 130236418 | . | + | . | gene_id "XLOC_052472"; transcript_id "TCONS_00086353"; exon_number "2";  |
| oId "CUFF.95348.2"; tss_id "TSS65755";  |           |   |   |   |                                                                          |
| chr8 Cufflinks exon130249730            | 130249824 | . | + | . | gene_id "XLOC_052472"; transcript_id "TCONS_00086353"; exon_number "3";  |
| oId "CUFF.95348.2"; tss_id "TSS65755";  |           |   |   |   |                                                                          |
| chr8 Cufflinks exon130253233            | 130253741 | . | + | . | gene_id "XLOC_052472"; transcript_id "TCONS_00086353"; exon_number "4";  |
| oId "CUFF.95348.2"; tss_id "TSS65755";  |           |   |   |   |                                                                          |
| chr8 Cufflinks exon130253958            | 130254600 | . | + | . | gene_id "XLOC_052472"; transcript_id "TCONS_00086353"; exon_number "5";  |
| oId "CUFF.95348.2"; tss_id "TSS65755";  |           |   |   |   |                                                                          |
| chr8 Cufflinks exon130152302            | 130152403 | . | + | . | gene_id "XLOC_052472"; transcript_id "TCONS_00086352"; exon_number "1";  |
| oId "CUFF.95348.1"; tss_id "TSS65755";  |           |   |   |   |                                                                          |
| chr8 Cufflinks exon130236346            | 130236418 | . | + | . | gene_id "XLOC_052472"; transcript_id "TCONS_00086352"; exon_number "2";  |

oId "CUFF.95348.1"; tss\_id "TSS65755";  
chr8 Cufflinks exon130248944 130249102 . + . gene\_id "XLOC\_052472"; transcript\_id "TCONS\_00086352"; exon\_number "3";  
oId "CUFF.95348.1"; tss\_id "TSS65755";  
chr8 Cufflinks exon130249727 130249825 . + . gene\_id "XLOC\_052472"; transcript\_id "TCONS\_00086352"; exon\_number "4";  
oId "CUFF.95348.1"; tss\_id "TSS65755";  
chr8 Cufflinks exon130253234 130253356 . + . gene\_id "XLOC\_052472"; transcript\_id "TCONS\_00086352"; exon\_number "5";  
oId "CUFF.95348.1"; tss\_id "TSS65755";  
chr8 Cufflinks exon130253453 130254600 . + . gene\_id "XLOC\_052472"; transcript\_id "TCONS\_00086352"; exon\_number "6";  
oId "CUFF.95348.1"; tss\_id "TSS65755";  
chr8 Cufflinks exon130152368 130152403 . + . gene\_id "XLOC\_052472"; transcript\_id "TCONS\_00086354"; exon\_number "1";  
oId "CUFF.95348.3"; tss\_id "TSS65755";  
chr8 Cufflinks exon130253233 130253741 . + . gene\_id "XLOC\_052472"; transcript\_id "TCONS\_00086354"; exon\_number "2";  
oId "CUFF.95348.3"; tss\_id "TSS65755";  
chr8 Cufflinks exon130253958 130254600 . + . gene\_id "XLOC\_052472"; transcript\_id "TCONS\_00086354"; exon\_number "3";  
oId "CUFF.95348.3"; tss\_id "TSS65755";  
chr8 Cufflinks exon130427502 130427535 . + . gene\_id "XLOC\_052479"; transcript\_id "TCONS\_00086361"; exon\_number "1";  
oId "CUFF.95431.1"; tss\_id "TSS65762";  
chr8 Cufflinks exon130428186 130428273 . + . gene\_id "XLOC\_052479"; transcript\_id "TCONS\_00086361"; exon\_number "2";  
oId "CUFF.95431.1"; tss\_id "TSS65762";  
chr8 Cufflinks exon130428355 130428475 . + . gene\_id "XLOC\_052479"; transcript\_id "TCONS\_00086361"; exon\_number "3";  
oId "CUFF.95431.1"; tss\_id "TSS65762";  
chr8 Cufflinks exon130452220 130452274 . + . gene\_id "XLOC\_052479"; transcript\_id "TCONS\_00086361"; exon\_number "4";  
oId "CUFF.95431.1"; tss\_id "TSS65762";  
chr8 Cufflinks exon130457952 130458746 . + . gene\_id "XLOC\_052479"; transcript\_id "TCONS\_00086361"; exon\_number "5";  
oId "CUFF.95431.1"; tss\_id "TSS65762";  
chr8 Cufflinks exon130427975 130428023 . + . gene\_id "XLOC\_052479"; transcript\_id "TCONS\_00086364"; exon\_number "1";  
oId "CUFF.95431.4"; tss\_id "TSS65764";  
chr8 Cufflinks exon130428186 130428273 . + . gene\_id "XLOC\_052479"; transcript\_id "TCONS\_00086364"; exon\_number "2";  
oId "CUFF.95431.4"; tss\_id "TSS65764";  
chr8 Cufflinks exon130428355 130428475 . + . gene\_id "XLOC\_052479"; transcript\_id "TCONS\_00086364"; exon\_number "3";  
oId "CUFF.95431.4"; tss\_id "TSS65764";  
chr8 Cufflinks exon130452220 130452274 . + . gene\_id "XLOC\_052479"; transcript\_id "TCONS\_00086364"; exon\_number "4";  
oId "CUFF.95431.4"; tss\_id "TSS65764";  
chr8 Cufflinks exon130458780 130458878 . + . gene\_id "XLOC\_052479"; transcript\_id "TCONS\_00086364"; exon\_number "5";  
oId "CUFF.95431.4"; tss\_id "TSS65764";  
chr8 Cufflinks exon130464993 130467234 . + . gene\_id "XLOC\_052479"; transcript\_id "TCONS\_00086364"; exon\_number "6";  
oId "CUFF.95431.4"; tss\_id "TSS65764";  
chr8 Cufflinks exon130427975 130428023 . + . gene\_id "XLOC\_052479"; transcript\_id "TCONS\_00086363"; exon\_number "1";  
oId "CUFF.95431.3"; tss\_id "TSS65764";  
chr8 Cufflinks exon130428186 130428273 . + . gene\_id "XLOC\_052479"; transcript\_id "TCONS\_00086363"; exon\_number "2";  
oId "CUFF.95431.3"; tss\_id "TSS65764";  
chr8 Cufflinks exon130430994 130431073 . + . gene\_id "XLOC\_052479"; transcript\_id "TCONS\_00086363"; exon\_number "3";  
oId "CUFF.95431.3"; tss\_id "TSS65764";

|                                        |           |   |   |   |                                                                         |
|----------------------------------------|-----------|---|---|---|-------------------------------------------------------------------------|
| chr8 Cufflinks exon130452220           | 130452274 | . | + | . | gene_id "XLOC_052479"; transcript_id "TCONS_00086363"; exon_number "4"; |
| oId "CUFF.95431.3"; tss_id "TSS65764"; |           |   |   |   |                                                                         |
| chr8 Cufflinks exon130458780           | 130458872 | . | + | . | gene_id "XLOC_052479"; transcript_id "TCONS_00086363"; exon_number "5"; |
| oId "CUFF.95431.3"; tss_id "TSS65764"; |           |   |   |   |                                                                         |
| chr8 Cufflinks exon130464993           | 130467234 | . | + | . | gene_id "XLOC_052479"; transcript_id "TCONS_00086363"; exon_number "6"; |
| oId "CUFF.95431.3"; tss_id "TSS65764"; |           |   |   |   |                                                                         |
| chr8 Cufflinks exon130428138           | 130428273 | . | + | . | gene_id "XLOC_052479"; transcript_id "TCONS_00086365"; exon_number "1"; |
| oId "CUFF.95431.6"; tss_id "TSS65765"; |           |   |   |   |                                                                         |
| chr8 Cufflinks exon130450382           | 130450514 | . | + | . | gene_id "XLOC_052479"; transcript_id "TCONS_00086365"; exon_number "2"; |
| oId "CUFF.95431.6"; tss_id "TSS65765"; |           |   |   |   |                                                                         |
| chr8 Cufflinks exon130452220           | 130452274 | . | + | . | gene_id "XLOC_052479"; transcript_id "TCONS_00086365"; exon_number "3"; |
| oId "CUFF.95431.6"; tss_id "TSS65765"; |           |   |   |   |                                                                         |
| chr8 Cufflinks exon130457952           | 130458746 | . | + | . | gene_id "XLOC_052479"; transcript_id "TCONS_00086365"; exon_number "4"; |
| oId "CUFF.95431.6"; tss_id "TSS65765"; |           |   |   |   |                                                                         |
| chr8 Cufflinks exon130428138           | 130428273 | . | + | . | gene_id "XLOC_052479"; transcript_id "TCONS_00086367"; exon_number "1"; |
| oId "CUFF.95431.7"; tss_id "TSS65765"; |           |   |   |   |                                                                         |
| chr8 Cufflinks exon130452220           | 130452274 | . | + | . | gene_id "XLOC_052479"; transcript_id "TCONS_00086367"; exon_number "2"; |
| oId "CUFF.95431.7"; tss_id "TSS65765"; |           |   |   |   |                                                                         |
| chr8 Cufflinks exon130458780           | 130458872 | . | + | . | gene_id "XLOC_052479"; transcript_id "TCONS_00086367"; exon_number "3"; |
| oId "CUFF.95431.7"; tss_id "TSS65765"; |           |   |   |   |                                                                         |
| chr8 Cufflinks exon130464993           | 130467234 | . | + | . | gene_id "XLOC_052479"; transcript_id "TCONS_00086367"; exon_number "4"; |
| oId "CUFF.95431.7"; tss_id "TSS65765"; |           |   |   |   |                                                                         |
| chr8 Cufflinks exon130428138           | 130428273 | . | + | . | gene_id "XLOC_052479"; transcript_id "TCONS_00086366"; exon_number "1"; |
| oId "CUFF.95431.5"; tss_id "TSS65765"; |           |   |   |   |                                                                         |
| chr8 Cufflinks exon130430994           | 130431078 | . | + | . | gene_id "XLOC_052479"; transcript_id "TCONS_00086366"; exon_number "2"; |
| oId "CUFF.95431.5"; tss_id "TSS65765"; |           |   |   |   |                                                                         |
| chr8 Cufflinks exon130452220           | 130452274 | . | + | . | gene_id "XLOC_052479"; transcript_id "TCONS_00086366"; exon_number "3"; |
| oId "CUFF.95431.5"; tss_id "TSS65765"; |           |   |   |   |                                                                         |
| chr8 Cufflinks exon130458780           | 130458872 | . | + | . | gene_id "XLOC_052479"; transcript_id "TCONS_00086366"; exon_number "4"; |
| oId "CUFF.95431.5"; tss_id "TSS65765"; |           |   |   |   |                                                                         |
| chr8 Cufflinks exon130464993           | 130467234 | . | + | . | gene_id "XLOC_052479"; transcript_id "TCONS_00086366"; exon_number "5"; |
| oId "CUFF.95431.5"; tss_id "TSS65765"; |           |   |   |   |                                                                         |
| chr8 Cufflinks exon130432832           | 130435575 | . | + | . | gene_id "XLOC_052479"; transcript_id "TCONS_00086369"; exon_number "1"; |
| oId "CUFF.95431.8"; tss_id "TSS65766"; |           |   |   |   |                                                                         |
| chr8 Cufflinks exon130452220           | 130452274 | . | + | . | gene_id "XLOC_052479"; transcript_id "TCONS_00086369"; exon_number "2"; |
| oId "CUFF.95431.8"; tss_id "TSS65766"; |           |   |   |   |                                                                         |
| chr8 Cufflinks exon130457952           | 130458872 | . | + | . | gene_id "XLOC_052479"; transcript_id "TCONS_00086369"; exon_number "3"; |
| oId "CUFF.95431.8"; tss_id "TSS65766"; |           |   |   |   |                                                                         |
| chr8 Cufflinks exon130464993           | 130467234 | . | + | . | gene_id "XLOC_052479"; transcript_id "TCONS_00086369"; exon_number "4"; |
| oId "CUFF.95431.8"; tss_id "TSS65766"; |           |   |   |   |                                                                         |
| chr8 Cufflinks exon134898561           | 134898783 | . | + | . | gene_id "XLOC_052491"; transcript_id "TCONS_00086392"; exon_number "1"; |
| oId "CUFF.95497.1"; tss_id "TSS65781"; |           |   |   |   |                                                                         |
| chr8 Cufflinks exon134914426           | 134914650 | . | + | . | gene_id "XLOC_052491"; transcript_id "TCONS_00086392"; exon_number "2"; |

|                                                                                  |   |   |   |                                                                         |
|----------------------------------------------------------------------------------|---|---|---|-------------------------------------------------------------------------|
| oId "CUFF.95497.1"; tss_id "TSS65781";<br>chr8 Cufflinks exon134898739 134898783 | . | + | . | gene_id "XLOC_052491"; transcript_id "TCONS_00086393"; exon_number "1"; |
| oId "CUFF.95497.2"; tss_id "TSS65782";<br>chr8 Cufflinks exon134909799 134909931 | . | + | . | gene_id "XLOC_052491"; transcript_id "TCONS_00086393"; exon_number "2"; |
| oId "CUFF.95497.2"; tss_id "TSS65782";<br>chr8 Cufflinks exon134910281 134910459 | . | + | . | gene_id "XLOC_052491"; transcript_id "TCONS_00086393"; exon_number "3"; |
| oId "CUFF.95497.2"; tss_id "TSS65782";<br>chr8 Cufflinks exon134914426 134914650 | . | + | . | gene_id "XLOC_052491"; transcript_id "TCONS_00086393"; exon_number "4"; |
| oId "CUFF.95497.2"; tss_id "TSS65782";<br>chr8 Cufflinks exon143279648 143281125 | . | + | . | gene_id "XLOC_052515"; transcript_id "TCONS_00086429"; exon_number "1"; |
| oId "CUFF.95588.2"; tss_id "TSS65814";<br>chr8 Cufflinks exon143281219 143281505 | . | + | . | gene_id "XLOC_052515"; transcript_id "TCONS_00086429"; exon_number "2"; |
| oId "CUFF.95588.2"; tss_id "TSS65814";<br>chr8 Cufflinks exon143281588 143288362 | . | + | . | gene_id "XLOC_052515"; transcript_id "TCONS_00086429"; exon_number "3"; |
| oId "CUFF.95588.2"; tss_id "TSS65814";<br>chr8 Cufflinks exon143279648 143279817 | . | + | . | gene_id "XLOC_052515"; transcript_id "TCONS_00086430"; exon_number "1"; |
| oId "CUFF.95588.1"; tss_id "TSS65814";<br>chr8 Cufflinks exon143281046 143281125 | . | + | . | gene_id "XLOC_052515"; transcript_id "TCONS_00086430"; exon_number "2"; |
| oId "CUFF.95588.1"; tss_id "TSS65814";<br>chr8 Cufflinks exon143281219 143288236 | . | + | . | gene_id "XLOC_052515"; transcript_id "TCONS_00086430"; exon_number "3"; |
| oId "CUFF.95588.1"; tss_id "TSS65814";<br>chr8 Cufflinks exon143289611 143290364 | . | + | . | gene_id "XLOC_052515"; transcript_id "TCONS_00086430"; exon_number "4"; |
| oId "CUFF.95588.1"; tss_id "TSS65814";<br>chr8 Cufflinks exon143279672 143279818 | . | + | . | gene_id "XLOC_052515"; transcript_id "TCONS_00086431"; exon_number "1"; |
| oId "CUFF.95588.3"; tss_id "TSS65814";<br>chr8 Cufflinks exon143281046 143281125 | . | + | . | gene_id "XLOC_052515"; transcript_id "TCONS_00086431"; exon_number "2"; |
| oId "CUFF.95588.3"; tss_id "TSS65814";<br>chr8 Cufflinks exon143281219 143281505 | . | + | . | gene_id "XLOC_052515"; transcript_id "TCONS_00086431"; exon_number "3"; |
| oId "CUFF.95588.3"; tss_id "TSS65814";<br>chr8 Cufflinks exon143281588 143288236 | . | + | . | gene_id "XLOC_052515"; transcript_id "TCONS_00086431"; exon_number "4"; |
| oId "CUFF.95588.3"; tss_id "TSS65814";<br>chr8 Cufflinks exon143289611 143290364 | . | + | . | gene_id "XLOC_052515"; transcript_id "TCONS_00086431"; exon_number "5"; |
| oId "CUFF.95588.3"; tss_id "TSS65814";<br>chr8 Cufflinks exon143279674 143279817 | . | + | . | gene_id "XLOC_052515"; transcript_id "TCONS_00086432"; exon_number "1"; |
| oId "CUFF.95588.4"; tss_id "TSS65814";<br>chr8 Cufflinks exon143280908 143281125 | . | + | . | gene_id "XLOC_052515"; transcript_id "TCONS_00086432"; exon_number "2"; |
| oId "CUFF.95588.4"; tss_id "TSS65814";<br>chr8 Cufflinks exon143281219 143281505 | . | + | . | gene_id "XLOC_052515"; transcript_id "TCONS_00086432"; exon_number "3"; |
| oId "CUFF.95588.4"; tss_id "TSS65814";<br>chr8 Cufflinks exon143281588 143288362 | . | + | . | gene_id "XLOC_052515"; transcript_id "TCONS_00086432"; exon_number "4"; |
| oId "CUFF.95588.4"; tss_id "TSS65814";<br>chr8 Cufflinks exon143719949 143720241 | . | + | . | gene_id "XLOC_052518"; transcript_id "TCONS_00086439"; exon_number "1"; |
| oId "CUFF.95597.4"; tss_id "TSS65819";                                           |   |   |   |                                                                         |



chr8 Cufflinks exon143721816 143722024 . + . gene\_id "XLOC\_052518"; transcript\_id "TCONS\_00086439"; exon\_number "2";  
oId "CUFF.95597.4"; tss\_id "TSS65819";

chr8 Cufflinks exon144105302 144109822 . + . gene\_id "XLOC\_052533"; transcript\_id "TCONS\_00086457"; exon\_number "1";  
oId "CUFF.95630.1"; tss\_id "TSS65836";

chr8 Cufflinks exon144109910 144113300 . + . gene\_id "XLOC\_052533"; transcript\_id "TCONS\_00086457"; exon\_number "2";  
oId "CUFF.95630.1"; tss\_id "TSS65836";

chr8 Cufflinks exon144113418 144113939 . + . gene\_id "XLOC\_052533"; transcript\_id "TCONS\_00086457"; exon\_number "3";  
oId "CUFF.95630.1"; tss\_id "TSS65836";

chr8 Cufflinks exon144363957 144364838 . + . gene\_id "XLOC\_052546"; transcript\_id "TCONS\_00086475"; exon\_number "1";  
oId "CUFF.95657.1"; tss\_id "TSS65855";

chr8 Cufflinks exon144364968 144365119 . + . gene\_id "XLOC\_052546"; transcript\_id "TCONS\_00086475"; exon\_number "2";  
oId "CUFF.95657.1"; tss\_id "TSS65855";

chr8 Cufflinks exon144370423 144370559 . + . gene\_id "XLOC\_052546"; transcript\_id "TCONS\_00086475"; exon\_number "3";  
oId "CUFF.95657.1"; tss\_id "TSS65855";

chr8 Cufflinks exon144389979 144390085 . + . gene\_id "XLOC\_052555"; transcript\_id "TCONS\_00086485"; exon\_number "1";  
oId "CUFF.95672.1"; tss\_id "TSS65864";

chr8 Cufflinks exon144390602 144391294 . + . gene\_id "XLOC\_052555"; transcript\_id "TCONS\_00086485"; exon\_number "2";  
oId "CUFF.95672.1"; tss\_id "TSS65864";

chr8 Cufflinks exon145141183 145141596 . + . gene\_id "XLOC\_052580"; transcript\_id "TCONS\_00086535"; exon\_number "1";  
oId "CUFF.95760.1"; tss\_id "TSS65891";

chr8 Cufflinks exon145143209 145143232 . + . gene\_id "XLOC\_052580"; transcript\_id "TCONS\_00086535"; exon\_number "2";  
oId "CUFF.95760.1"; tss\_id "TSS65891";

chr8 Cufflinks exon1919398 1920523 . - . gene\_id "XLOC\_052651"; transcript\_id "TCONS\_00086646"; exon\_number "1"; oId  
"CUFF.91924.1"; tss\_id "TSS65979";

chr8 Cufflinks exon1920706 1920829 . - . gene\_id "XLOC\_052651"; transcript\_id "TCONS\_00086646"; exon\_number "2"; oId  
"CUFF.91924.1"; tss\_id "TSS65979";

chr8 Cufflinks exon1921314 1921835 . - . gene\_id "XLOC\_052651"; transcript\_id "TCONS\_00086646"; exon\_number "3"; oId  
"CUFF.91924.1"; tss\_id "TSS65979";

chr8 Cufflinks exon1920840 1921202 . - . gene\_id "XLOC\_052651"; transcript\_id "TCONS\_00086647"; exon\_number "1"; oId  
"CUFF.91924.2"; tss\_id "TSS65979";

chr8 Cufflinks exon1921314 1921835 . - . gene\_id "XLOC\_052651"; transcript\_id "TCONS\_00086647"; exon\_number "2"; oId  
"CUFF.91924.2"; tss\_id "TSS65979";

chr8 Cufflinks exon2139666 2142189 . - . gene\_id "XLOC\_052653"; transcript\_id "TCONS\_00086650"; exon\_number "1"; oId  
"CUFF.91937.4"; tss\_id "TSS65982";

chr8 Cufflinks exon2143884 2145009 . - . gene\_id "XLOC\_052653"; transcript\_id "TCONS\_00086650"; exon\_number "2"; oId  
"CUFF.91937.4"; tss\_id "TSS65982";

chr8 Cufflinks exon2145032 2145077 . - . gene\_id "XLOC\_052653"; transcript\_id "TCONS\_00086650"; exon\_number "3"; oId  
"CUFF.91937.4"; tss\_id "TSS65982";

chr8 Cufflinks exon2139666 2141972 . - . gene\_id "XLOC\_052653"; transcript\_id "TCONS\_00086652"; exon\_number "1"; oId  
"CUFF.91937.3"; tss\_id "TSS65983";

chr8 Cufflinks exon2145396 2146044 . - . gene\_id "XLOC\_052653"; transcript\_id "TCONS\_00086652"; exon\_number "2"; oId  
"CUFF.91937.3"; tss\_id "TSS65983";

chr8 Cufflinks exon2139666 2144006 . - . gene\_id "XLOC\_052653"; transcript\_id "TCONS\_00086651"; exon\_number "1"; oId

"CUFF.91937.1"; tss\_id "TSS65983";  
chr8 Cufflinks exon2145396 2146044 . - . gene\_id "XLOC\_052653"; transcript\_id "TCONS\_00086651"; exon\_number "2"; oId  
"CUFF.91937.1"; tss\_id "TSS65983";  
chr8 Cufflinks exon2139666 2142189 . - . gene\_id "XLOC\_052653"; transcript\_id "TCONS\_00086653"; exon\_number "1"; oId  
"CUFF.91937.5"; tss\_id "TSS65984";  
chr8 Cufflinks exon2145396 2146196 . - . gene\_id "XLOC\_052653"; transcript\_id "TCONS\_00086653"; exon\_number "2"; oId  
"CUFF.91937.5"; tss\_id "TSS65984";  
chr8 Cufflinks exon2147275 2147678 . - . gene\_id "XLOC\_052654"; transcript\_id "TCONS\_00086654"; exon\_number "1"; oId  
"CUFF.91938.1"; tss\_id "TSS65985";  
chr8 Cufflinks exon2158671 2162187 . - . gene\_id "XLOC\_052654"; transcript\_id "TCONS\_00086654"; exon\_number "2"; oId  
"CUFF.91938.1"; tss\_id "TSS65985";  
chr8 Cufflinks exon2359797 2360824 . - . gene\_id "XLOC\_052663"; transcript\_id "TCONS\_00086665"; exon\_number "1"; oId  
"CUFF.91972.1"; tss\_id "TSS65994";  
chr8 Cufflinks exon2362070 2364248 . - . gene\_id "XLOC\_052663"; transcript\_id "TCONS\_00086665"; exon\_number "2"; oId  
"CUFF.91972.1"; tss\_id "TSS65994";  
chr8 Cufflinks exon2359797 2360972 . - . gene\_id "XLOC\_052663"; transcript\_id "TCONS\_00086666"; exon\_number "1"; oId  
"CUFF.91972.2"; tss\_id "TSS65995";  
chr8 Cufflinks exon2368038 2368071 . - . gene\_id "XLOC\_052663"; transcript\_id "TCONS\_00086666"; exon\_number "2"; oId  
"CUFF.91972.2"; tss\_id "TSS65995";  
chr8 Cufflinks exon2374989 2375075 . - . gene\_id "XLOC\_052670"; transcript\_id "TCONS\_00086673"; exon\_number "1"; oId  
"CUFF.91980.1"; tss\_id "TSS66002";  
chr8 Cufflinks exon2376833 2376956 . - . gene\_id "XLOC\_052670"; transcript\_id "TCONS\_00086673"; exon\_number "2"; oId  
"CUFF.91980.1"; tss\_id "TSS66002";  
chr8 Cufflinks exon2385796 2386129 . - . gene\_id "XLOC\_052670"; transcript\_id "TCONS\_00086673"; exon\_number "3"; oId  
"CUFF.91980.1"; tss\_id "TSS66002";  
chr8 Cufflinks exon2386749 2386908 . - . gene\_id "XLOC\_052670"; transcript\_id "TCONS\_00086673"; exon\_number "4"; oId  
"CUFF.91980.1"; tss\_id "TSS66002";  
chr8 Cufflinks exon2387516 2387599 . - . gene\_id "XLOC\_052670"; transcript\_id "TCONS\_00086673"; exon\_number "5"; oId  
"CUFF.91980.1"; tss\_id "TSS66002";  
chr8 Cufflinks exon2413377 2413572 . - . gene\_id "XLOC\_052670"; transcript\_id "TCONS\_00086673"; exon\_number "6"; oId  
"CUFF.91980.1"; tss\_id "TSS66002";  
chr8 Cufflinks exon2415813 2415840 . - . gene\_id "XLOC\_052670"; transcript\_id "TCONS\_00086673"; exon\_number "7"; oId  
"CUFF.91980.1"; tss\_id "TSS66002";  
chr8 Cufflinks exon2387219 2387293 . - . gene\_id "XLOC\_052674"; transcript\_id "TCONS\_00086677"; exon\_number "1"; oId  
"CUFF.91984.1"; tss\_id "TSS66006";  
chr8 Cufflinks exon2452656 2452794 . - . gene\_id "XLOC\_052674"; transcript\_id "TCONS\_00086677"; exon\_number "2"; oId  
"CUFF.91984.1"; tss\_id "TSS66006";  
chr8 Cufflinks exon2453716 2453795 . - . gene\_id "XLOC\_052674"; transcript\_id "TCONS\_00086677"; exon\_number "3"; oId  
"CUFF.91984.1"; tss\_id "TSS66006";  
chr8 Cufflinks exon2461872 2462021 . - . gene\_id "XLOC\_052674"; transcript\_id "TCONS\_00086677"; exon\_number "4"; oId  
"CUFF.91984.1"; tss\_id "TSS66006";  
chr8 Cufflinks exon2532238 2532353 . - . gene\_id "XLOC\_052674"; transcript\_id "TCONS\_00086677"; exon\_number "5"; oId  
"CUFF.91984.1"; tss\_id "TSS66006";

chr8 Cufflinks exon2585870 2585991 . - . gene\_id "XLOC\_052674"; transcript\_id "TCONS\_00086677"; exon\_number "6"; oId  
"CUFF.91984.1"; tss\_id "TSS66006";  
chr8 Cufflinks exon2505699 2506402 . - . gene\_id "XLOC\_052674"; transcript\_id "TCONS\_00086691"; exon\_number "1"; oId  
"CUFF.91984.2"; tss\_id "TSS66006";  
chr8 Cufflinks exon2532238 2532353 . - . gene\_id "XLOC\_052674"; transcript\_id "TCONS\_00086691"; exon\_number "2"; oId  
"CUFF.91984.2"; tss\_id "TSS66006";  
chr8 Cufflinks exon2585870 2585991 . - . gene\_id "XLOC\_052674"; transcript\_id "TCONS\_00086691"; exon\_number "3"; oId  
"CUFF.91984.2"; tss\_id "TSS66006";  
chr8 Cufflinks exon2520202 2523700 . - . gene\_id "XLOC\_052674"; transcript\_id "TCONS\_00086696"; exon\_number "1"; oId  
"CUFF.91984.3"; tss\_id "TSS66008";  
chr8 Cufflinks exon2526834 2526934 . - . gene\_id "XLOC\_052674"; transcript\_id "TCONS\_00086696"; exon\_number "2"; oId  
"CUFF.91984.3"; tss\_id "TSS66008";  
chr8 Cufflinks exon2527293 2527521 . - . gene\_id "XLOC\_052674"; transcript\_id "TCONS\_00086696"; exon\_number "3"; oId  
"CUFF.91984.3"; tss\_id "TSS66008";  
chr8 Cufflinks exon2529225 2531227 . - . gene\_id "XLOC\_052674"; transcript\_id "TCONS\_00086696"; exon\_number "4"; oId  
"CUFF.91984.3"; tss\_id "TSS66008";  
chr8 Cufflinks exon2520202 2523700 . - . gene\_id "XLOC\_052674"; transcript\_id "TCONS\_00086697"; exon\_number "1"; oId  
"CUFF.91984.4"; tss\_id "TSS66006";  
chr8 Cufflinks exon2527293 2527521 . - . gene\_id "XLOC\_052674"; transcript\_id "TCONS\_00086697"; exon\_number "2"; oId  
"CUFF.91984.4"; tss\_id "TSS66006";  
chr8 Cufflinks exon2532238 2532355 . - . gene\_id "XLOC\_052674"; transcript\_id "TCONS\_00086697"; exon\_number "3"; oId  
"CUFF.91984.4"; tss\_id "TSS66006";  
chr8 Cufflinks exon2562746 2562817 . - . gene\_id "XLOC\_052674"; transcript\_id "TCONS\_00086697"; exon\_number "4"; oId  
"CUFF.91984.4"; tss\_id "TSS66006";  
chr8 Cufflinks exon2585870 2585991 . - . gene\_id "XLOC\_052674"; transcript\_id "TCONS\_00086697"; exon\_number "5"; oId  
"CUFF.91984.4"; tss\_id "TSS66006";  
chr8 Cufflinks exon2520202 2523700 . - . gene\_id "XLOC\_052674"; transcript\_id "TCONS\_00086698"; exon\_number "1"; oId  
"CUFF.91984.5"; tss\_id "TSS66009";  
chr8 Cufflinks exon2527293 2527521 . - . gene\_id "XLOC\_052674"; transcript\_id "TCONS\_00086698"; exon\_number "2"; oId  
"CUFF.91984.5"; tss\_id "TSS66009";  
chr8 Cufflinks exon2532238 2532353 . - . gene\_id "XLOC\_052674"; transcript\_id "TCONS\_00086698"; exon\_number "3"; oId  
"CUFF.91984.5"; tss\_id "TSS66009";  
chr8 Cufflinks exon2562746 2562817 . - . gene\_id "XLOC\_052674"; transcript\_id "TCONS\_00086698"; exon\_number "4"; oId  
"CUFF.91984.5"; tss\_id "TSS66009";  
chr8 Cufflinks exon2585870 2586103 . - . gene\_id "XLOC\_052674"; transcript\_id "TCONS\_00086698"; exon\_number "5"; oId  
"CUFF.91984.5"; tss\_id "TSS66009";  
chr8 Cufflinks exon2553999 2554472 . - . gene\_id "XLOC\_052674"; transcript\_id "TCONS\_00086701"; exon\_number "1"; oId  
"CUFF.91984.8"; tss\_id "TSS66006";  
chr8 Cufflinks exon2562746 2562817 . - . gene\_id "XLOC\_052674"; transcript\_id "TCONS\_00086701"; exon\_number "2"; oId  
"CUFF.91984.8"; tss\_id "TSS66006";  
chr8 Cufflinks exon2585870 2585991 . - . gene\_id "XLOC\_052674"; transcript\_id "TCONS\_00086701"; exon\_number "3"; oId  
"CUFF.91984.8"; tss\_id "TSS66006";  
chr8 Cufflinks exon2558058 2559395 . - . gene\_id "XLOC\_052674"; transcript\_id "TCONS\_00086705"; exon\_number "1"; oId

"CUFF.91984.10"; tss\_id "TSS66006";  
chr8 Cufflinks exon2562746 2562817 . - . gene\_id "XLOC\_052674"; transcript\_id "TCONS\_00086705"; exon\_number "2"; oId  
"CUFF.91984.10"; tss\_id "TSS66006";  
chr8 Cufflinks exon2585870 2585991 . - . gene\_id "XLOC\_052674"; transcript\_id "TCONS\_00086705"; exon\_number "3"; oId  
"CUFF.91984.10"; tss\_id "TSS66006";  
chr8 Cufflinks exon8314465 8314592 . - . gene\_id "XLOC\_052751"; transcript\_id "TCONS\_00086782"; exon\_number "1"; oId  
"CUFF.92270.1"; tss\_id "TSS66098";  
chr8 Cufflinks exon8318630 8318962 . - . gene\_id "XLOC\_052751"; transcript\_id "TCONS\_00086782"; exon\_number "2"; oId  
"CUFF.92270.1"; tss\_id "TSS66098";  
chr8 Cufflinks exon8314465 8314592 . - . gene\_id "XLOC\_052751"; transcript\_id "TCONS\_00086783"; exon\_number "1"; oId  
"CUFF.92270.2"; tss\_id "TSS66098";  
chr8 Cufflinks exon8315919 8316036 . - . gene\_id "XLOC\_052751"; transcript\_id "TCONS\_00086783"; exon\_number "2"; oId  
"CUFF.92270.2"; tss\_id "TSS66098";  
chr8 Cufflinks exon8318630 8318976 . - . gene\_id "XLOC\_052751"; transcript\_id "TCONS\_00086783"; exon\_number "3"; oId  
"CUFF.92270.2"; tss\_id "TSS66098";  
chr8 Cufflinks exon16231079 16231252 . - . gene\_id "XLOC\_052807"; transcript\_id "TCONS\_00086875"; exon\_number "1";  
oId "CUFF.92520.1"; tss\_id "TSS66167";  
chr8 Cufflinks exon16240788 16240836 . - . gene\_id "XLOC\_052807"; transcript\_id "TCONS\_00086875"; exon\_number "2";  
oId "CUFF.92520.1"; tss\_id "TSS66167";  
chr8 Cufflinks exon16353302 16355493 . - . gene\_id "XLOC\_052807"; transcript\_id "TCONS\_00086875"; exon\_number "3";  
oId "CUFF.92520.1"; tss\_id "TSS66167";  
chr8 Cufflinks exon16369347 16369419 . - . gene\_id "XLOC\_052807"; transcript\_id "TCONS\_00086875"; exon\_number "4";  
oId "CUFF.92520.1"; tss\_id "TSS66167";  
chr8 Cufflinks exon16423044 16423096 . - . gene\_id "XLOC\_052807"; transcript\_id "TCONS\_00086875"; exon\_number "5";  
oId "CUFF.92520.1"; tss\_id "TSS66167";  
chr8 Cufflinks exon16424901 16425074 . - . gene\_id "XLOC\_052807"; transcript\_id "TCONS\_00086875"; exon\_number "6";  
oId "CUFF.92520.1"; tss\_id "TSS66167";  
chr8 Cufflinks exon16325523 16325547 . - . gene\_id "XLOC\_052807"; transcript\_id "TCONS\_00086877"; exon\_number "1";  
oId "CUFF.92520.2"; tss\_id "TSS66167";  
chr8 Cufflinks exon16353304 16355498 . - . gene\_id "XLOC\_052807"; transcript\_id "TCONS\_00086877"; exon\_number "2";  
oId "CUFF.92520.2"; tss\_id "TSS66167";  
chr8 Cufflinks exon16369356 16369419 . - . gene\_id "XLOC\_052807"; transcript\_id "TCONS\_00086877"; exon\_number "3";  
oId "CUFF.92520.2"; tss\_id "TSS66167";  
chr8 Cufflinks exon16424901 16425074 . - . gene\_id "XLOC\_052807"; transcript\_id "TCONS\_00086877"; exon\_number "4";  
oId "CUFF.92520.2"; tss\_id "TSS66167";  
chr8 Cufflinks exon24030840 24031881 . - . gene\_id "XLOC\_052882"; transcript\_id "TCONS\_00087009"; exon\_number "1";  
oId "CUFF.92767.1"; tss\_id "TSS66278";  
chr8 Cufflinks exon24034533 24034699 . - . gene\_id "XLOC\_052882"; transcript\_id "TCONS\_00087009"; exon\_number "2";  
oId "CUFF.92767.1"; tss\_id "TSS66278";  
chr8 Cufflinks exon24040719 24040796 . - . gene\_id "XLOC\_052882"; transcript\_id "TCONS\_00087009"; exon\_number "3";  
oId "CUFF.92767.1"; tss\_id "TSS66278";  
chr8 Cufflinks exon24111683 24111784 . - . gene\_id "XLOC\_052882"; transcript\_id "TCONS\_00087009"; exon\_number "4";  
oId "CUFF.92767.1"; tss\_id "TSS66278";

|                                        |          |   |   |   |                                                                         |
|----------------------------------------|----------|---|---|---|-------------------------------------------------------------------------|
| chr8 Cufflinks exon24153667            | 24153763 | . | - | . | gene_id "XLOC_052882"; transcript_id "TCONS_00087009"; exon_number "5"; |
| oId "CUFF.92767.1"; tss_id "TSS66278"; |          |   |   |   |                                                                         |
| chr8 Cufflinks exon24158398            | 24158442 | . | - | . | gene_id "XLOC_052882"; transcript_id "TCONS_00087009"; exon_number "6"; |
| oId "CUFF.92767.1"; tss_id "TSS66278"; |          |   |   |   |                                                                         |
| chr8 Cufflinks exon24244674            | 24245112 | . | - | . | gene_id "XLOC_052882"; transcript_id "TCONS_00087009"; exon_number "7"; |
| oId "CUFF.92767.1"; tss_id "TSS66278"; |          |   |   |   |                                                                         |
| chr8 Cufflinks exon24152299            | 24153570 | . | - | . | gene_id "XLOC_052882"; transcript_id "TCONS_00087014"; exon_number "1"; |
| oId "CUFF.92767.2"; tss_id "TSS66279"; |          |   |   |   |                                                                         |
| chr8 Cufflinks exon24153667            | 24153763 | . | - | . | gene_id "XLOC_052882"; transcript_id "TCONS_00087014"; exon_number "2"; |
| oId "CUFF.92767.2"; tss_id "TSS66279"; |          |   |   |   |                                                                         |
| chr8 Cufflinks exon24158398            | 24158442 | . | - | . | gene_id "XLOC_052882"; transcript_id "TCONS_00087014"; exon_number "3"; |
| oId "CUFF.92767.2"; tss_id "TSS66279"; |          |   |   |   |                                                                         |
| chr8 Cufflinks exon24244674            | 24244854 | . | - | . | gene_id "XLOC_052882"; transcript_id "TCONS_00087014"; exon_number "4"; |
| oId "CUFF.92767.2"; tss_id "TSS66279"; |          |   |   |   |                                                                         |
| chr8 Cufflinks exon24245264            | 24245504 | . | - | . | gene_id "XLOC_052882"; transcript_id "TCONS_00087014"; exon_number "5"; |
| oId "CUFF.92767.2"; tss_id "TSS66279"; |          |   |   |   |                                                                         |
| chr8 Cufflinks exon24406053            | 24406131 | . | - | . | gene_id "XLOC_052882"; transcript_id "TCONS_00087014"; exon_number "6"; |
| oId "CUFF.92767.2"; tss_id "TSS66279"; |          |   |   |   |                                                                         |
| chr8 Cufflinks exon30416745            | 30432515 | . | - | . | gene_id "XLOC_052939"; transcript_id "TCONS_00087114"; exon_number "1"; |
| oId "CUFF.92967.1"; tss_id "TSS66356"; |          |   |   |   |                                                                         |
| chr8 Cufflinks exon30433812            | 30435878 | . | - | . | gene_id "XLOC_052939"; transcript_id "TCONS_00087114"; exon_number "2"; |
| oId "CUFF.92967.1"; tss_id "TSS66356"; |          |   |   |   |                                                                         |
| chr8 Cufflinks exon30432888            | 30433111 | . | - | . | gene_id "XLOC_052939"; transcript_id "TCONS_00087115"; exon_number "1"; |
| oId "CUFF.92967.2"; tss_id "TSS66356"; |          |   |   |   |                                                                         |
| chr8 Cufflinks exon30433812            | 30435878 | . | - | . | gene_id "XLOC_052939"; transcript_id "TCONS_00087115"; exon_number "2"; |
| oId "CUFF.92967.2"; tss_id "TSS66356"; |          |   |   |   |                                                                         |
| chr8 Cufflinks exon49428418            | 49428916 | . | - | . | gene_id "XLOC_053017"; transcript_id "TCONS_00087248"; exon_number "1"; |
| oId "CUFF.93272.2"; tss_id "TSS66453"; |          |   |   |   |                                                                         |
| chr8 Cufflinks exon49429618            | 49429774 | . | - | . | gene_id "XLOC_053017"; transcript_id "TCONS_00087248"; exon_number "2"; |
| oId "CUFF.93272.2"; tss_id "TSS66453"; |          |   |   |   |                                                                         |
| chr8 Cufflinks exon49430560            | 49430611 | . | - | . | gene_id "XLOC_053017"; transcript_id "TCONS_00087248"; exon_number "3"; |
| oId "CUFF.93272.2"; tss_id "TSS66453"; |          |   |   |   |                                                                         |
| chr8 Cufflinks exon49428418            | 49428913 | . | - | . | gene_id "XLOC_053017"; transcript_id "TCONS_00087247"; exon_number "1"; |
| oId "CUFF.93272.1"; tss_id "TSS66453"; |          |   |   |   |                                                                         |
| chr8 Cufflinks exon49429618            | 49429774 | . | - | . | gene_id "XLOC_053017"; transcript_id "TCONS_00087247"; exon_number "2"; |
| oId "CUFF.93272.1"; tss_id "TSS66453"; |          |   |   |   |                                                                         |
| chr8 Cufflinks exon49430560            | 49430611 | . | - | . | gene_id "XLOC_053017"; transcript_id "TCONS_00087247"; exon_number "3"; |
| oId "CUFF.93272.1"; tss_id "TSS66453"; |          |   |   |   |                                                                         |
| chr8 Cufflinks exon56916774            | 56916789 | . | - | . | gene_id "XLOC_053051"; transcript_id "TCONS_00087292"; exon_number "1"; |
| oId "CUFF.93406.1"; tss_id "TSS66493"; |          |   |   |   |                                                                         |
| chr8 Cufflinks exon56963238            | 56963756 | . | - | . | gene_id "XLOC_053051"; transcript_id "TCONS_00087292"; exon_number "2"; |
| oId "CUFF.93406.1"; tss_id "TSS66493"; |          |   |   |   |                                                                         |
| chr8 Cufflinks exon59708868            | 59710009 | . | - | . | gene_id "XLOC_053069"; transcript_id "TCONS_00087321"; exon_number "1"; |

|                                        |   |   |   |                                                                         |  |
|----------------------------------------|---|---|---|-------------------------------------------------------------------------|--|
| oId "CUFF.93455.2"; tss_id "TSS66518"; |   |   |   |                                                                         |  |
| chr8 Cufflinks exon59713819 59713847   | . | - | . | gene_id "XLOC_053069"; transcript_id "TCONS_00087321"; exon_number "2"; |  |
| oId "CUFF.93455.2"; tss_id "TSS66518"; |   |   |   |                                                                         |  |
| chr8 Cufflinks exon61314730 61317808   | . | - | . | gene_id "XLOC_053082"; transcript_id "TCONS_00087343"; exon_number "1"; |  |
| oId "CUFF.93539.4"; tss_id "TSS66536"; |   |   |   |                                                                         |  |
| chr8 Cufflinks exon61320914 61321056   | . | - | . | gene_id "XLOC_053082"; transcript_id "TCONS_00087343"; exon_number "2"; |  |
| oId "CUFF.93539.4"; tss_id "TSS66536"; |   |   |   |                                                                         |  |
| chr8 Cufflinks exon61326115 61326377   | . | - | . | gene_id "XLOC_053082"; transcript_id "TCONS_00087343"; exon_number "3"; |  |
| oId "CUFF.93539.4"; tss_id "TSS66536"; |   |   |   |                                                                         |  |
| chr8 Cufflinks exon61314730 61317808   | . | - | . | gene_id "XLOC_053082"; transcript_id "TCONS_00087344"; exon_number "1"; |  |
| oId "CUFF.93539.2"; tss_id "TSS66537"; |   |   |   |                                                                         |  |
| chr8 Cufflinks exon61380631 61380751   | . | - | . | gene_id "XLOC_053082"; transcript_id "TCONS_00087344"; exon_number "2"; |  |
| oId "CUFF.93539.2"; tss_id "TSS66537"; |   |   |   |                                                                         |  |
| chr8 Cufflinks exon61381427 61381675   | . | - | . | gene_id "XLOC_053082"; transcript_id "TCONS_00087344"; exon_number "3"; |  |
| oId "CUFF.93539.2"; tss_id "TSS66537"; |   |   |   |                                                                         |  |
| chr8 Cufflinks exon61421206 61421321   | . | - | . | gene_id "XLOC_053082"; transcript_id "TCONS_00087344"; exon_number "4"; |  |
| oId "CUFF.93539.2"; tss_id "TSS66537"; |   |   |   |                                                                         |  |
| chr8 Cufflinks exon61429157 61429202   | . | - | . | gene_id "XLOC_053082"; transcript_id "TCONS_00087344"; exon_number "5"; |  |
| oId "CUFF.93539.2"; tss_id "TSS66537"; |   |   |   |                                                                         |  |
| chr8 Cufflinks exon61314730 61317808   | . | - | . | gene_id "XLOC_053082"; transcript_id "TCONS_00087345"; exon_number "1"; |  |
| oId "CUFF.93539.1"; tss_id "TSS66537"; |   |   |   |                                                                         |  |
| chr8 Cufflinks exon61421206 61421321   | . | - | . | gene_id "XLOC_053082"; transcript_id "TCONS_00087345"; exon_number "2"; |  |
| oId "CUFF.93539.1"; tss_id "TSS66537"; |   |   |   |                                                                         |  |
| chr8 Cufflinks exon61429157 61429228   | . | - | . | gene_id "XLOC_053082"; transcript_id "TCONS_00087345"; exon_number "3"; |  |
| oId "CUFF.93539.1"; tss_id "TSS66537"; |   |   |   |                                                                         |  |
| chr8 Cufflinks exon61314730 61317808   | . | - | . | gene_id "XLOC_053082"; transcript_id "TCONS_00087346"; exon_number "1"; |  |
| oId "CUFF.93539.3"; tss_id "TSS66537"; |   |   |   |                                                                         |  |
| chr8 Cufflinks exon61421208 61421321   | . | - | . | gene_id "XLOC_053082"; transcript_id "TCONS_00087346"; exon_number "2"; |  |
| oId "CUFF.93539.3"; tss_id "TSS66537"; |   |   |   |                                                                         |  |
| chr8 Cufflinks exon61429157 61429258   | . | - | . | gene_id "XLOC_053082"; transcript_id "TCONS_00087346"; exon_number "3"; |  |
| oId "CUFF.93539.3"; tss_id "TSS66537"; |   |   |   |                                                                         |  |
| chr8 Cufflinks exon61377793 61378184   | . | - | . | gene_id "XLOC_053082"; transcript_id "TCONS_00087348"; exon_number "1"; |  |
| oId "CUFF.93539.5"; tss_id "TSS66537"; |   |   |   |                                                                         |  |
| chr8 Cufflinks exon61380631 61380751   | . | - | . | gene_id "XLOC_053082"; transcript_id "TCONS_00087348"; exon_number "2"; |  |
| oId "CUFF.93539.5"; tss_id "TSS66537"; |   |   |   |                                                                         |  |
| chr8 Cufflinks exon61421206 61421321   | . | - | . | gene_id "XLOC_053082"; transcript_id "TCONS_00087348"; exon_number "3"; |  |
| oId "CUFF.93539.5"; tss_id "TSS66537"; |   |   |   |                                                                         |  |
| chr8 Cufflinks exon61429157 61429228   | . | - | . | gene_id "XLOC_053082"; transcript_id "TCONS_00087348"; exon_number "4"; |  |
| oId "CUFF.93539.5"; tss_id "TSS66537"; |   |   |   |                                                                         |  |
| chr8 Cufflinks exon66503648 66508521   | . | - | . | gene_id "XLOC_053109"; transcript_id "TCONS_00087386"; exon_number "1"; |  |
| oId "CUFF.93616.3"; tss_id "TSS66565"; |   |   |   |                                                                         |  |
| chr8 Cufflinks exon66508732 66514624   | . | - | . | gene_id "XLOC_053109"; transcript_id "TCONS_00087386"; exon_number "2"; |  |
| oId "CUFF.93616.3"; tss_id "TSS66565"; |   |   |   |                                                                         |  |

chr8 Cufflinks exon66503648 66507413 . - . gene\_id "XLOC\_053109"; transcript\_id "TCONS\_00087385"; exon\_number "1";  
oId "CUFF.93616.2"; tss\_id "TSS66565";

chr8 Cufflinks exon66508732 66514624 . - . gene\_id "XLOC\_053109"; transcript\_id "TCONS\_00087385"; exon\_number "2";  
oId "CUFF.93616.2"; tss\_id "TSS66565";

chr8 Cufflinks exon66852207 66854762 . - . gene\_id "XLOC\_053117"; transcript\_id "TCONS\_00087400"; exon\_number "1";  
oId "CUFF.93630.6"; tss\_id "TSS66577";

chr8 Cufflinks exon66856528 66857344 . - . gene\_id "XLOC\_053117"; transcript\_id "TCONS\_00087400"; exon\_number "2";  
oId "CUFF.93630.6"; tss\_id "TSS66577";

chr8 Cufflinks exon66852207 66854765 . - . gene\_id "XLOC\_053117"; transcript\_id "TCONS\_00087401"; exon\_number "1";  
oId "CUFF.93630.4"; tss\_id "TSS66578";

chr8 Cufflinks exon66863856 66863885 . - . gene\_id "XLOC\_053117"; transcript\_id "TCONS\_00087401"; exon\_number "2";  
oId "CUFF.93630.4"; tss\_id "TSS66578";

chr8 Cufflinks exon 66852207 66854762 . - . gene\_id "XLOC\_053117"; transcript\_id "TCONS\_00087402";  
exon\_number "1"; oId "CUFF.93630.3"; tss\_id "TSS66578";

chr8 Cufflinks exon 66856528 66856586 . - . gene\_id "XLOC\_053117"; transcript\_id "TCONS\_00087402";  
exon\_number "2"; oId "CUFF.93630.3"; tss\_id "TSS66578";

chr8 Cufflinks exon 66857290 66857354 . - . gene\_id "XLOC\_053117"; transcript\_id "TCONS\_00087402";  
exon\_number "3"; oId "CUFF.93630.3"; tss\_id "TSS66578";

chr8 Cufflinks exon 66863857 66863954 . - . gene\_id "XLOC\_053117"; transcript\_id "TCONS\_00087402";  
exon\_number "4"; oId "CUFF.93630.3"; tss\_id "TSS66578";

chr8 Cufflinks exon 66852207 66854762 . - . gene\_id "XLOC\_053117"; transcript\_id "TCONS\_00087403";  
exon\_number "1"; oId "CUFF.93630.2"; tss\_id "TSS66579";

chr8 Cufflinks exon 66863856 66864126 . - . gene\_id "XLOC\_053117"; transcript\_id "TCONS\_00087403";  
exon\_number "2"; oId "CUFF.93630.2"; tss\_id "TSS66579";

chr8 Cufflinks exon 66852207 66854762 . - . gene\_id "XLOC\_053117"; transcript\_id "TCONS\_00087405";  
exon\_number "1"; oId "CUFF.93630.5"; tss\_id "TSS66579";

chr8 Cufflinks exon 66862630 66864206 . - . gene\_id "XLOC\_053117"; transcript\_id "TCONS\_00087405";  
exon\_number "2"; oId "CUFF.93630.5"; tss\_id "TSS66579";

chr8 Cufflinks exon 67716056 67716075 . - . gene\_id "XLOC\_053134"; transcript\_id "TCONS\_00087424";  
exon\_number "1"; oId "CUFF.93691.1"; tss\_id "TSS66596";

chr8 Cufflinks exon 67834223 67834628 . - . gene\_id "XLOC\_053134"; transcript\_id "TCONS\_00087424";  
exon\_number "2"; oId "CUFF.93691.1"; tss\_id "TSS66596";

chr8 Cufflinks exon 67834850 67834960 . - . gene\_id "XLOC\_053134"; transcript\_id "TCONS\_00087424";  
exon\_number "3"; oId "CUFF.93691.1"; tss\_id "TSS66596";

chr8 Cufflinks exon 67837672 67837777 . - . gene\_id "XLOC\_053134"; transcript\_id "TCONS\_00087424";  
exon\_number "4"; oId "CUFF.93691.1"; tss\_id "TSS66596";

chr8 Cufflinks exon 67716056 67716075 . - . gene\_id "XLOC\_053134"; transcript\_id "TCONS\_00087425";  
exon\_number "1"; oId "CUFF.93691.2"; tss\_id "TSS66596";

chr8 Cufflinks exon 67834223 67834349 . - . gene\_id "XLOC\_053134"; transcript\_id "TCONS\_00087425";  
exon\_number "2"; oId "CUFF.93691.2"; tss\_id "TSS66596";

chr8 Cufflinks exon 67834559 67834627 . - . gene\_id "XLOC\_053134"; transcript\_id "TCONS\_00087425";  
exon\_number "3"; oId "CUFF.93691.2"; tss\_id "TSS66596";

chr8 Cufflinks exon 67834849 67834960 . - . gene\_id "XLOC\_053134"; transcript\_id "TCONS\_00087425";

exon\_number "4"; oId "CUFF.93691.2"; tss\_id "TSS66596";  
 chr8 Cufflinks exon 67837672 67837800 . - . gene\_id "XLOC\_053134"; transcript\_id "TCONS\_00087425";  
 exon\_number "5"; oId "CUFF.93691.2"; tss\_id "TSS66596";  
 chr8 Cufflinks exon 67834229 67834349 . - . gene\_id "XLOC\_053134"; transcript\_id "TCONS\_00087426";  
 exon\_number "1"; oId "CUFF.93691.3"; tss\_id "TSS66596";  
 chr8 Cufflinks exon 67834849 67834960 . - . gene\_id "XLOC\_053134"; transcript\_id "TCONS\_00087426";  
 exon\_number "2"; oId "CUFF.93691.3"; tss\_id "TSS66596";  
 chr8 Cufflinks exon 67837672 67837800 . - . gene\_id "XLOC\_053134"; transcript\_id "TCONS\_00087426";  
 exon\_number "3"; oId "CUFF.93691.3"; tss\_id "TSS66596";  
 chr8 Cufflinks exon 89820869 89821462 . - . gene\_id "XLOC\_053230"; transcript\_id "TCONS\_00087585";  
 exon\_number "1"; oId "CUFF.94102.5"; tss\_id "TSS66715";  
 chr8 Cufflinks exon 89822672 89822780 . - . gene\_id "XLOC\_053230"; transcript\_id "TCONS\_00087585";  
 exon\_number "2"; oId "CUFF.94102.5"; tss\_id "TSS66715";  
 chr8 Cufflinks exon 89855024 89855037 . - . gene\_id "XLOC\_053230"; transcript\_id "TCONS\_00087585";  
 exon\_number "3"; oId "CUFF.94102.5"; tss\_id "TSS66715";  
 chr8 Cufflinks exon 89820869 89821462 . - . gene\_id "XLOC\_053230"; transcript\_id "TCONS\_00087587";  
 exon\_number "1"; oId "CUFF.94102.2"; tss\_id "TSS66716";  
 chr8 Cufflinks exon89822672 89822780 . - . gene\_id "XLOC\_053230"; transcript\_id "TCONS\_00087587"; exon\_number  
 "2"; oId "CUFF.94102.2"; tss\_id "TSS66716";  
 chr8 Cufflinks exon89823499 89823867 . - . gene\_id "XLOC\_053230"; transcript\_id "TCONS\_00087587"; exon\_number "3";  
 oId "CUFF.94102.2"; tss\_id "TSS66716";  
 chr8 Cufflinks exon89855024 89855076 . - . gene\_id "XLOC\_053230"; transcript\_id "TCONS\_00087587"; exon\_number "4";  
 oId "CUFF.94102.2"; tss\_id "TSS66716";  
 chr8 Cufflinks exon89859413 89859522 . - . gene\_id "XLOC\_053230"; transcript\_id "TCONS\_00087587"; exon\_number "5";  
 oId "CUFF.94102.2"; tss\_id "TSS66716";  
 chr8 Cufflinks exon89872917 89873077 . - . gene\_id "XLOC\_053230"; transcript\_id "TCONS\_00087587"; exon\_number "6";  
 oId "CUFF.94102.2"; tss\_id "TSS66716";  
 chr8 Cufflinks exon89875859 89876020 . - . gene\_id "XLOC\_053230"; transcript\_id "TCONS\_00087587"; exon\_number "7";  
 oId "CUFF.94102.2"; tss\_id "TSS66716";  
 chr8 Cufflinks exon89894243 89894311 . - . gene\_id "XLOC\_053230"; transcript\_id "TCONS\_00087587"; exon\_number "8";  
 oId "CUFF.94102.2"; tss\_id "TSS66716";  
 chr8 Cufflinks exon89820869 89821462 . - . gene\_id "XLOC\_053230"; transcript\_id "TCONS\_00087586"; exon\_number "1";  
 oId "CUFF.94102.1"; tss\_id "TSS66716";  
 chr8 Cufflinks exon89822672 89822780 . - . gene\_id "XLOC\_053230"; transcript\_id "TCONS\_00087586"; exon\_number "2";  
 oId "CUFF.94102.1"; tss\_id "TSS66716";  
 chr8 Cufflinks exon89823499 89823694 . - . gene\_id "XLOC\_053230"; transcript\_id "TCONS\_00087586"; exon\_number "3";  
 oId "CUFF.94102.1"; tss\_id "TSS66716";  
 chr8 Cufflinks exon89855024 89855076 . - . gene\_id "XLOC\_053230"; transcript\_id "TCONS\_00087586"; exon\_number "4";  
 oId "CUFF.94102.1"; tss\_id "TSS66716";  
 chr8 Cufflinks exon89859413 89859521 . - . gene\_id "XLOC\_053230"; transcript\_id "TCONS\_00087586"; exon\_number "5";  
 oId "CUFF.94102.1"; tss\_id "TSS66716";  
 chr8 Cufflinks exon89872917 89873077 . - . gene\_id "XLOC\_053230"; transcript\_id "TCONS\_00087586"; exon\_number "6";  
 oId "CUFF.94102.1"; tss\_id "TSS66716";



|                                        |          |   |   |   |                                                                         |
|----------------------------------------|----------|---|---|---|-------------------------------------------------------------------------|
| chr8 Cufflinks exon89875859            | 89876020 | . | - | . | gene_id "XLOC_053230"; transcript_id "TCONS_00087586"; exon_number "7"; |
| oId "CUFF.94102.1"; tss_id "TSS66716"; |          |   |   |   |                                                                         |
| chr8 Cufflinks exon89894243            | 89894311 | . | - | . | gene_id "XLOC_053230"; transcript_id "TCONS_00087586"; exon_number "8"; |
| oId "CUFF.94102.1"; tss_id "TSS66716"; |          |   |   |   |                                                                         |
| chr8 Cufflinks exon89823845            | 89823867 | . | - | . | gene_id "XLOC_053230"; transcript_id "TCONS_00087588"; exon_number "1"; |
| oId "CUFF.94102.7"; tss_id "TSS66716"; |          |   |   |   |                                                                         |
| chr8 Cufflinks exon89859413            | 89859521 | . | - | . | gene_id "XLOC_053230"; transcript_id "TCONS_00087588"; exon_number "2"; |
| oId "CUFF.94102.7"; tss_id "TSS66716"; |          |   |   |   |                                                                         |
| chr8 Cufflinks exon89872917            | 89873077 | . | - | . | gene_id "XLOC_053230"; transcript_id "TCONS_00087588"; exon_number "3"; |
| oId "CUFF.94102.7"; tss_id "TSS66716"; |          |   |   |   |                                                                         |
| chr8 Cufflinks exon89875878            | 89876020 | . | - | . | gene_id "XLOC_053230"; transcript_id "TCONS_00087588"; exon_number "4"; |
| oId "CUFF.94102.7"; tss_id "TSS66716"; |          |   |   |   |                                                                         |
| chr8 Cufflinks exon89894243            | 89894290 | . | - | . | gene_id "XLOC_053230"; transcript_id "TCONS_00087588"; exon_number "5"; |
| oId "CUFF.94102.7"; tss_id "TSS66716"; |          |   |   |   |                                                                         |
| chr8 Cufflinks exon90729475            | 90729956 | . | - | . | gene_id "XLOC_053236"; transcript_id "TCONS_00087594"; exon_number "1"; |
| oId "CUFF.94124.2"; tss_id "TSS66722"; |          |   |   |   |                                                                         |
| chr8 Cufflinks exon90734243            | 90734384 | . | - | . | gene_id "XLOC_053236"; transcript_id "TCONS_00087594"; exon_number "2"; |
| oId "CUFF.94124.2"; tss_id "TSS66722"; |          |   |   |   |                                                                         |
| chr8 Cufflinks exon90736857            | 90737194 | . | - | . | gene_id "XLOC_053236"; transcript_id "TCONS_00087594"; exon_number "3"; |
| oId "CUFF.94124.2"; tss_id "TSS66722"; |          |   |   |   |                                                                         |
| chr8 Cufflinks exon90737746            | 90737869 | . | - | . | gene_id "XLOC_053236"; transcript_id "TCONS_00087594"; exon_number "4"; |
| oId "CUFF.94124.2"; tss_id "TSS66722"; |          |   |   |   |                                                                         |
| chr8 Cufflinks exon90769273            | 90769939 | . | - | . | gene_id "XLOC_053236"; transcript_id "TCONS_00087594"; exon_number "5"; |
| oId "CUFF.94124.2"; tss_id "TSS66722"; |          |   |   |   |                                                                         |
| chr8 Cufflinks exon90733277            | 90733602 | . | - | . | gene_id "XLOC_053236"; transcript_id "TCONS_00087597"; exon_number "1"; |
| oId "CUFF.94124.3"; tss_id "TSS66722"; |          |   |   |   |                                                                         |
| chr8 Cufflinks exon90734243            | 90734309 | . | - | . | gene_id "XLOC_053236"; transcript_id "TCONS_00087597"; exon_number "2"; |
| oId "CUFF.94124.3"; tss_id "TSS66722"; |          |   |   |   |                                                                         |
| chr8 Cufflinks exon90736857            | 90737194 | . | - | . | gene_id "XLOC_053236"; transcript_id "TCONS_00087597"; exon_number "3"; |
| oId "CUFF.94124.3"; tss_id "TSS66722"; |          |   |   |   |                                                                         |
| chr8 Cufflinks exon90737734            | 90737870 | . | - | . | gene_id "XLOC_053236"; transcript_id "TCONS_00087597"; exon_number "4"; |
| oId "CUFF.94124.3"; tss_id "TSS66722"; |          |   |   |   |                                                                         |
| chr8 Cufflinks exon90769274            | 90769939 | . | - | . | gene_id "XLOC_053236"; transcript_id "TCONS_00087597"; exon_number "5"; |
| oId "CUFF.94124.3"; tss_id "TSS66722"; |          |   |   |   |                                                                         |
| chr8 Cufflinks exon90736378            | 90737194 | . | - | . | gene_id "XLOC_053236"; transcript_id "TCONS_00087599"; exon_number "1"; |
| oId "CUFF.94124.4"; tss_id "TSS66722"; |          |   |   |   |                                                                         |
| chr8 Cufflinks exon90737746            | 90737869 | . | - | . | gene_id "XLOC_053236"; transcript_id "TCONS_00087599"; exon_number "2"; |
| oId "CUFF.94124.4"; tss_id "TSS66722"; |          |   |   |   |                                                                         |
| chr8 Cufflinks exon90769273            | 90769939 | . | - | . | gene_id "XLOC_053236"; transcript_id "TCONS_00087599"; exon_number "3"; |
| oId "CUFF.94124.4"; tss_id "TSS66722"; |          |   |   |   |                                                                         |
| chr8 Cufflinks exon92072134            | 92075974 | . | - | . | gene_id "XLOC_053252"; transcript_id "TCONS_00087623"; exon_number "1"; |
| oId "CUFF.94177.1"; tss_id "TSS66742"; |          |   |   |   |                                                                         |
| chr8 Cufflinks exon92081807            | 92082050 | . | - | . | gene_id "XLOC_053252"; transcript_id "TCONS_00087623"; exon_number "2"; |

|                                        |   |   |   |                                                                         |  |
|----------------------------------------|---|---|---|-------------------------------------------------------------------------|--|
| oId "CUFF.94177.1"; tss_id "TSS66742"; |   |   |   |                                                                         |  |
| chr8 Cufflinks exon92082159 92082417   | . | - | . | gene_id "XLOC_053252"; transcript_id "TCONS_00087623"; exon_number "3"; |  |
| oId "CUFF.94177.1"; tss_id "TSS66742"; |   |   |   |                                                                         |  |
| chr8 Cufflinks exon92080143 92082050   | . | - | . | gene_id "XLOC_053252"; transcript_id "TCONS_00087624"; exon_number "1"; |  |
| oId "CUFF.94177.3"; tss_id "TSS66742"; |   |   |   |                                                                         |  |
| chr8 Cufflinks exon92082159 92082417   | . | - | . | gene_id "XLOC_053252"; transcript_id "TCONS_00087624"; exon_number "2"; |  |
| oId "CUFF.94177.3"; tss_id "TSS66742"; |   |   |   |                                                                         |  |
| chr8 Cufflinks exon93687215 93687519   | . | - | . | gene_id "XLOC_053255"; transcript_id "TCONS_00087628"; exon_number "1"; |  |
| oId "CUFF.94222.2"; tss_id "TSS66745"; |   |   |   |                                                                         |  |
| chr8 Cufflinks exon93730627 93730746   | . | - | . | gene_id "XLOC_053255"; transcript_id "TCONS_00087628"; exon_number "2"; |  |
| oId "CUFF.94222.2"; tss_id "TSS66745"; |   |   |   |                                                                         |  |
| chr8 Cufflinks exon93770732 93770861   | . | - | . | gene_id "XLOC_053255"; transcript_id "TCONS_00087628"; exon_number "3"; |  |
| oId "CUFF.94222.2"; tss_id "TSS66745"; |   |   |   |                                                                         |  |
| chr8 Cufflinks exon93687215 93687519   | . | - | . | gene_id "XLOC_053255"; transcript_id "TCONS_00087627"; exon_number "1"; |  |
| oId "CUFF.94222.1"; tss_id "TSS66745"; |   |   |   |                                                                         |  |
| chr8 Cufflinks exon93770732 93770861   | . | - | . | gene_id "XLOC_053255"; transcript_id "TCONS_00087627"; exon_number "2"; |  |
| oId "CUFF.94222.1"; tss_id "TSS66745"; |   |   |   |                                                                         |  |
| chr8 Cufflinks exon93711462 93712217   | . | - | . | gene_id "XLOC_053255"; transcript_id "TCONS_00087630"; exon_number "1"; |  |
| oId "CUFF.94222.4"; tss_id "TSS66745"; |   |   |   |                                                                         |  |
| chr8 Cufflinks exon93730627 93730746   | . | - | . | gene_id "XLOC_053255"; transcript_id "TCONS_00087630"; exon_number "2"; |  |
| oId "CUFF.94222.4"; tss_id "TSS66745"; |   |   |   |                                                                         |  |
| chr8 Cufflinks exon93770732 93770861   | . | - | . | gene_id "XLOC_053255"; transcript_id "TCONS_00087630"; exon_number "3"; |  |
| oId "CUFF.94222.4"; tss_id "TSS66745"; |   |   |   |                                                                         |  |
| chr8 Cufflinks exon93711462 93712217   | . | - | . | gene_id "XLOC_053255"; transcript_id "TCONS_00087629"; exon_number "1"; |  |
| oId "CUFF.94222.3"; tss_id "TSS66745"; |   |   |   |                                                                         |  |
| chr8 Cufflinks exon93767890 93767925   | . | - | . | gene_id "XLOC_053255"; transcript_id "TCONS_00087629"; exon_number "2"; |  |
| oId "CUFF.94222.3"; tss_id "TSS66745"; |   |   |   |                                                                         |  |
| chr8 Cufflinks exon93770732 93770861   | . | - | . | gene_id "XLOC_053255"; transcript_id "TCONS_00087629"; exon_number "3"; |  |
| oId "CUFF.94222.3"; tss_id "TSS66745"; |   |   |   |                                                                         |  |
| chr8 Cufflinks exon93725190 93728350   | . | - | . | gene_id "XLOC_053255"; transcript_id "TCONS_00087631"; exon_number "1"; |  |
| oId "CUFF.94222.5"; tss_id "TSS66746"; |   |   |   |                                                                         |  |
| chr8 Cufflinks exon93730627 93730746   | . | - | . | gene_id "XLOC_053255"; transcript_id "TCONS_00087631"; exon_number "2"; |  |
| oId "CUFF.94222.5"; tss_id "TSS66746"; |   |   |   |                                                                         |  |
| chr8 Cufflinks exon93798204 93798288   | . | - | . | gene_id "XLOC_053255"; transcript_id "TCONS_00087631"; exon_number "3"; |  |
| oId "CUFF.94222.5"; tss_id "TSS66746"; |   |   |   |                                                                         |  |
| chr8 Cufflinks exon100014088 100014721 | . | - | . | gene_id "XLOC_053323"; transcript_id "TCONS_00087732"; exon_number "1"; |  |
| oId "CUFF.94445.4"; tss_id "TSS66826"; |   |   |   |                                                                         |  |
| chr8 Cufflinks exon100025186 100025261 | . | - | . | gene_id "XLOC_053323"; transcript_id "TCONS_00087732"; exon_number "2"; |  |
| oId "CUFF.94445.4"; tss_id "TSS66826"; |   |   |   |                                                                         |  |
| chr8 Cufflinks exon101925433 101929687 | . | - | . | gene_id "XLOC_053344"; transcript_id "TCONS_00087770"; exon_number "1"; |  |
| oId "CUFF.94511.1"; tss_id "TSS66854"; |   |   |   |                                                                         |  |
| chr8 Cufflinks exon101934906 101935000 | . | - | . | gene_id "XLOC_053344"; transcript_id "TCONS_00087770"; exon_number "2"; |  |
| oId "CUFF.94511.1"; tss_id "TSS66854"; |   |   |   |                                                                         |  |

chr8 Cufflinks exon102132455 102134749 . - . gene\_id "XLOC\_053348"; transcript\_id "TCONS\_00087778"; exon\_number "1";  
oId "CUFF.94522.1"; tss\_id "TSS66861";  
chr8 Cufflinks exon102137208 102137385 . - . gene\_id "XLOC\_053348"; transcript\_id "TCONS\_00087778"; exon\_number "2";  
oId "CUFF.94522.1"; tss\_id "TSS66861";  
chr8 Cufflinks exon102138205 102139153 . - . gene\_id "XLOC\_053348"; transcript\_id "TCONS\_00087778"; exon\_number "3";  
oId "CUFF.94522.1"; tss\_id "TSS66861";  
chr8 Cufflinks exon102178948 102190615 . - . gene\_id "XLOC\_053350"; transcript\_id "TCONS\_00087781"; exon\_number "1";  
oId "CUFF.94529.1"; tss\_id "TSS66863";  
chr8 Cufflinks exon102190951 102191138 . - . gene\_id "XLOC\_053350"; transcript\_id "TCONS\_00087781"; exon\_number "2";  
oId "CUFF.94529.1"; tss\_id "TSS66863";  
chr8 Cufflinks exon104168603 104169266 . - . gene\_id "XLOC\_053364"; transcript\_id "TCONS\_00087819"; exon\_number "1";  
oId "CUFF.94607.3"; tss\_id "TSS66891";  
chr8 Cufflinks exon104178053 104178524 . - . gene\_id "XLOC\_053364"; transcript\_id "TCONS\_00087819"; exon\_number "2";  
oId "CUFF.94607.3"; tss\_id "TSS66891";  
chr8 Cufflinks exon104246508 104246600 . - . gene\_id "XLOC\_053364"; transcript\_id "TCONS\_00087819"; exon\_number "3";  
oId "CUFF.94607.3"; tss\_id "TSS66891";  
chr8 Cufflinks exon104258522 104258912 . - . gene\_id "XLOC\_053364"; transcript\_id "TCONS\_00087819"; exon\_number "4";  
oId "CUFF.94607.3"; tss\_id "TSS66891";  
chr8 Cufflinks exon104279470 104279748 . - . gene\_id "XLOC\_053364"; transcript\_id "TCONS\_00087819"; exon\_number "5";  
oId "CUFF.94607.3"; tss\_id "TSS66891";  
chr8 Cufflinks exon104280619 104280691 . - . gene\_id "XLOC\_053364"; transcript\_id "TCONS\_00087819"; exon\_number "6";  
oId "CUFF.94607.3"; tss\_id "TSS66891";  
chr8 Cufflinks exon104168603 104169266 . - . gene\_id "XLOC\_053364"; transcript\_id "TCONS\_00087818"; exon\_number "1";  
oId "CUFF.94607.2"; tss\_id "TSS66891";  
chr8 Cufflinks exon104246508 104246600 . - . gene\_id "XLOC\_053364"; transcript\_id "TCONS\_00087818"; exon\_number "2";  
oId "CUFF.94607.2"; tss\_id "TSS66891";  
chr8 Cufflinks exon104258522 104258912 . - . gene\_id "XLOC\_053364"; transcript\_id "TCONS\_00087818"; exon\_number "3";  
oId "CUFF.94607.2"; tss\_id "TSS66891";  
chr8 Cufflinks exon104279470 104279748 . - . gene\_id "XLOC\_053364"; transcript\_id "TCONS\_00087818"; exon\_number "4";  
oId "CUFF.94607.2"; tss\_id "TSS66891";  
chr8 Cufflinks exon104280619 104280691 . - . gene\_id "XLOC\_053364"; transcript\_id "TCONS\_00087818"; exon\_number "5";  
oId "CUFF.94607.2"; tss\_id "TSS66891";  
chr8 Cufflinks exon104168603 104169266 . - . gene\_id "XLOC\_053364"; transcript\_id "TCONS\_00087817"; exon\_number "1";  
oId "CUFF.94607.1"; tss\_id "TSS66891";  
chr8 Cufflinks exon104178053 104178524 . - . gene\_id "XLOC\_053364"; transcript\_id "TCONS\_00087817"; exon\_number "2";  
oId "CUFF.94607.1"; tss\_id "TSS66891";  
chr8 Cufflinks exon104244066 104244204 . - . gene\_id "XLOC\_053364"; transcript\_id "TCONS\_00087817"; exon\_number "3";  
oId "CUFF.94607.1"; tss\_id "TSS66891";  
chr8 Cufflinks exon104246508 104246600 . - . gene\_id "XLOC\_053364"; transcript\_id "TCONS\_00087817"; exon\_number "4";  
oId "CUFF.94607.1"; tss\_id "TSS66891";  
chr8 Cufflinks exon104258522 104258912 . - . gene\_id "XLOC\_053364"; transcript\_id "TCONS\_00087817"; exon\_number "5";  
oId "CUFF.94607.1"; tss\_id "TSS66891";  
chr8 Cufflinks exon104279470 104279748 . - . gene\_id "XLOC\_053364"; transcript\_id "TCONS\_00087817"; exon\_number "6";

|                                        |   |   |   |                                                                         |  |
|----------------------------------------|---|---|---|-------------------------------------------------------------------------|--|
| oId "CUFF.94607.1"; tss_id "TSS66891"; |   |   |   |                                                                         |  |
| chr8 Cufflinks exon104280619 104280691 | . | - | . | gene_id "XLOC_053364"; transcript_id "TCONS_00087817"; exon_number "7"; |  |
| oId "CUFF.94607.1"; tss_id "TSS66891"; |   |   |   |                                                                         |  |
| chr8 Cufflinks exon104238196 104238418 | . | - | . | gene_id "XLOC_053364"; transcript_id "TCONS_00087824"; exon_number "1"; |  |
| oId "CUFF.94607.5"; tss_id "TSS66892"; |   |   |   |                                                                         |  |
| chr8 Cufflinks exon104246508 104246600 | . | - | . | gene_id "XLOC_053364"; transcript_id "TCONS_00087824"; exon_number "2"; |  |
| oId "CUFF.94607.5"; tss_id "TSS66892"; |   |   |   |                                                                         |  |
| chr8 Cufflinks exon104258522 104258912 | . | - | . | gene_id "XLOC_053364"; transcript_id "TCONS_00087824"; exon_number "3"; |  |
| oId "CUFF.94607.5"; tss_id "TSS66892"; |   |   |   |                                                                         |  |
| chr8 Cufflinks exon104279470 104279748 | . | - | . | gene_id "XLOC_053364"; transcript_id "TCONS_00087824"; exon_number "4"; |  |
| oId "CUFF.94607.5"; tss_id "TSS66892"; |   |   |   |                                                                         |  |
| chr8 Cufflinks exon104280920 104281071 | . | - | . | gene_id "XLOC_053364"; transcript_id "TCONS_00087824"; exon_number "5"; |  |
| oId "CUFF.94607.5"; tss_id "TSS66892"; |   |   |   |                                                                         |  |
| chr8 Cufflinks exon104298066 104298131 | . | - | . | gene_id "XLOC_053364"; transcript_id "TCONS_00087824"; exon_number "6"; |  |
| oId "CUFF.94607.5"; tss_id "TSS66892"; |   |   |   |                                                                         |  |
| chr8 Cufflinks exon104255806 104258912 | . | - | . | gene_id "XLOC_053364"; transcript_id "TCONS_00087826"; exon_number "1"; |  |
| oId "CUFF.94607.6"; tss_id "TSS66893"; |   |   |   |                                                                         |  |
| chr8 Cufflinks exon104290206 104290250 | . | - | . | gene_id "XLOC_053364"; transcript_id "TCONS_00087826"; exon_number "2"; |  |
| oId "CUFF.94607.6"; tss_id "TSS66893"; |   |   |   |                                                                         |  |
| chr8 Cufflinks exon106155128 106155975 | . | - | . | gene_id "XLOC_053379"; transcript_id "TCONS_00087839"; exon_number "1"; |  |
| oId "CUFF.94687.2"; tss_id "TSS66910"; |   |   |   |                                                                         |  |
| chr8 Cufflinks exon106157684 106157776 | . | - | . | gene_id "XLOC_053379"; transcript_id "TCONS_00087839"; exon_number "2"; |  |
| oId "CUFF.94687.2"; tss_id "TSS66910"; |   |   |   |                                                                         |  |
| chr8 Cufflinks exon106179646 106179717 | . | - | . | gene_id "XLOC_053379"; transcript_id "TCONS_00087839"; exon_number "3"; |  |
| oId "CUFF.94687.2"; tss_id "TSS66910"; |   |   |   |                                                                         |  |
| chr8 Cufflinks exon106200764 106201006 | . | - | . | gene_id "XLOC_053379"; transcript_id "TCONS_00087839"; exon_number "4"; |  |
| oId "CUFF.94687.2"; tss_id "TSS66910"; |   |   |   |                                                                         |  |
| chr8 Cufflinks exon106155128 106155975 | . | - | . | gene_id "XLOC_053379"; transcript_id "TCONS_00087838"; exon_number "1"; |  |
| oId "CUFF.94687.1"; tss_id "TSS66910"; |   |   |   |                                                                         |  |
| chr8 Cufflinks exon106179646 106179717 | . | - | . | gene_id "XLOC_053379"; transcript_id "TCONS_00087838"; exon_number "2"; |  |
| oId "CUFF.94687.1"; tss_id "TSS66910"; |   |   |   |                                                                         |  |
| chr8 Cufflinks exon106200764 106201006 | . | - | . | gene_id "XLOC_053379"; transcript_id "TCONS_00087838"; exon_number "3"; |  |
| oId "CUFF.94687.1"; tss_id "TSS66910"; |   |   |   |                                                                         |  |
| chr8 Cufflinks exon106176843 106177251 | . | - | . | gene_id "XLOC_053379"; transcript_id "TCONS_00087841"; exon_number "1"; |  |
| oId "CUFF.94687.3"; tss_id "TSS66910"; |   |   |   |                                                                         |  |
| chr8 Cufflinks exon106179646 106179717 | . | - | . | gene_id "XLOC_053379"; transcript_id "TCONS_00087841"; exon_number "2"; |  |
| oId "CUFF.94687.3"; tss_id "TSS66910"; |   |   |   |                                                                         |  |
| chr8 Cufflinks exon106200764 106201006 | . | - | . | gene_id "XLOC_053379"; transcript_id "TCONS_00087841"; exon_number "3"; |  |
| oId "CUFF.94687.3"; tss_id "TSS66910"; |   |   |   |                                                                         |  |
| chr8 Cufflinks exon106792638 106792795 | . | - | . | gene_id "XLOC_053382"; transcript_id "TCONS_00087844"; exon_number "1"; |  |
| oId "CUFF.94702.2"; tss_id "TSS66913"; |   |   |   |                                                                         |  |
| chr8 Cufflinks exon106794615 106794711 | . | - | . | gene_id "XLOC_053382"; transcript_id "TCONS_00087844"; exon_number "2"; |  |
| oId "CUFF.94702.2"; tss_id "TSS66913"; |   |   |   |                                                                         |  |

|                                        |           |   |   |   |                                                                         |
|----------------------------------------|-----------|---|---|---|-------------------------------------------------------------------------|
| chr8 Cufflinks exon106797290           | 106797445 | . | - | . | gene_id "XLOC_053382"; transcript_id "TCONS_00087844"; exon_number "3"; |
| oId "CUFF.94702.2"; tss_id "TSS66913"; |           |   |   |   |                                                                         |
| chr8 Cufflinks exon106799295           | 106799449 | . | - | . | gene_id "XLOC_053382"; transcript_id "TCONS_00087844"; exon_number "4"; |
| oId "CUFF.94702.2"; tss_id "TSS66913"; |           |   |   |   |                                                                         |
| chr8 Cufflinks exon106799677           | 106799824 | . | - | . | gene_id "XLOC_053382"; transcript_id "TCONS_00087844"; exon_number "5"; |
| oId "CUFF.94702.2"; tss_id "TSS66913"; |           |   |   |   |                                                                         |
| chr8 Cufflinks exon106810553           | 106810670 | . | - | . | gene_id "XLOC_053382"; transcript_id "TCONS_00087844"; exon_number "6"; |
| oId "CUFF.94702.2"; tss_id "TSS66913"; |           |   |   |   |                                                                         |
| chr8 Cufflinks exon107071309           | 107071364 | . | - | . | gene_id "XLOC_053382"; transcript_id "TCONS_00087844"; exon_number "7"; |
| oId "CUFF.94702.2"; tss_id "TSS66913"; |           |   |   |   |                                                                         |
| chr8 Cufflinks exon107072609           | 107072731 | . | - | . | gene_id "XLOC_053382"; transcript_id "TCONS_00087844"; exon_number "8"; |
| oId "CUFF.94702.2"; tss_id "TSS66913"; |           |   |   |   |                                                                         |
| chr8 Cufflinks exon106792638           | 106792795 | . | - | . | gene_id "XLOC_053382"; transcript_id "TCONS_00087843"; exon_number "1"; |
| oId "CUFF.94702.1"; tss_id "TSS66913"; |           |   |   |   |                                                                         |
| chr8 Cufflinks exon106794615           | 106794711 | . | - | . | gene_id "XLOC_053382"; transcript_id "TCONS_00087843"; exon_number "2"; |
| oId "CUFF.94702.1"; tss_id "TSS66913"; |           |   |   |   |                                                                         |
| chr8 Cufflinks exon106810553           | 106810670 | . | - | . | gene_id "XLOC_053382"; transcript_id "TCONS_00087843"; exon_number "3"; |
| oId "CUFF.94702.1"; tss_id "TSS66913"; |           |   |   |   |                                                                         |
| chr8 Cufflinks exon106939879           | 106939945 | . | - | . | gene_id "XLOC_053382"; transcript_id "TCONS_00087843"; exon_number "4"; |
| oId "CUFF.94702.1"; tss_id "TSS66913"; |           |   |   |   |                                                                         |
| chr8 Cufflinks exon107072609           | 107072731 | . | - | . | gene_id "XLOC_053382"; transcript_id "TCONS_00087843"; exon_number "5"; |
| oId "CUFF.94702.1"; tss_id "TSS66913"; |           |   |   |   |                                                                         |
| chr8 Cufflinks exon106792638           | 106792795 | . | - | . | gene_id "XLOC_053382"; transcript_id "TCONS_00087845"; exon_number "1"; |
| oId "CUFF.94702.3"; tss_id "TSS66913"; |           |   |   |   |                                                                         |
| chr8 Cufflinks exon106794615           | 106794711 | . | - | . | gene_id "XLOC_053382"; transcript_id "TCONS_00087845"; exon_number "2"; |
| oId "CUFF.94702.3"; tss_id "TSS66913"; |           |   |   |   |                                                                         |
| chr8 Cufflinks exon106797290           | 106797445 | . | - | . | gene_id "XLOC_053382"; transcript_id "TCONS_00087845"; exon_number "3"; |
| oId "CUFF.94702.3"; tss_id "TSS66913"; |           |   |   |   |                                                                         |
| chr8 Cufflinks exon106799295           | 106799449 | . | - | . | gene_id "XLOC_053382"; transcript_id "TCONS_00087845"; exon_number "4"; |
| oId "CUFF.94702.3"; tss_id "TSS66913"; |           |   |   |   |                                                                         |
| chr8 Cufflinks exon106799677           | 106799824 | . | - | . | gene_id "XLOC_053382"; transcript_id "TCONS_00087845"; exon_number "5"; |
| oId "CUFF.94702.3"; tss_id "TSS66913"; |           |   |   |   |                                                                         |
| chr8 Cufflinks exon106810553           | 106810670 | . | - | . | gene_id "XLOC_053382"; transcript_id "TCONS_00087845"; exon_number "6"; |
| oId "CUFF.94702.3"; tss_id "TSS66913"; |           |   |   |   |                                                                         |
| chr8 Cufflinks exon106939879           | 106939945 | . | - | . | gene_id "XLOC_053382"; transcript_id "TCONS_00087845"; exon_number "7"; |
| oId "CUFF.94702.3"; tss_id "TSS66913"; |           |   |   |   |                                                                         |
| chr8 Cufflinks exon107072609           | 107072804 | . | - | . | gene_id "XLOC_053382"; transcript_id "TCONS_00087845"; exon_number "8"; |
| oId "CUFF.94702.3"; tss_id "TSS66913"; |           |   |   |   |                                                                         |
| chr8 Cufflinks exon114625695           | 114627927 | . | - | . | gene_id "XLOC_053414"; transcript_id "TCONS_00087889"; exon_number "1"; |
| oId "CUFF.94843.1"; tss_id "TSS66952"; |           |   |   |   |                                                                         |
| chr8 Cufflinks exon114629455           | 114629690 | . | - | . | gene_id "XLOC_053414"; transcript_id "TCONS_00087889"; exon_number "2"; |
| oId "CUFF.94843.1"; tss_id "TSS66952"; |           |   |   |   |                                                                         |
| chr8 Cufflinks exon125204430           | 125205787 | . | - | . | gene_id "XLOC_053460"; transcript_id "TCONS_00087961"; exon_number "1"; |

oId "CUFF.95024.1"; tss\_id "TSS67012";  
chr8 Cufflinks exon125209944 125210122 . - . gene\_id "XLOC\_053460"; transcript\_id "TCONS\_00087961"; exon\_number "2";  
oId "CUFF.95024.1"; tss\_id "TSS67012";  
chr8 Cufflinks exon125204430 125205785 . - . gene\_id "XLOC\_053460"; transcript\_id "TCONS\_00087962"; exon\_number "1";  
oId "CUFF.95024.2"; tss\_id "TSS67012";  
chr8 Cufflinks exon125210073 125210126 . - . gene\_id "XLOC\_053460"; transcript\_id "TCONS\_00087962"; exon\_number "2";  
oId "CUFF.95024.2"; tss\_id "TSS67012";  
chr8 Cufflinks exon125204430 125205785 . - . gene\_id "XLOC\_053460"; transcript\_id "TCONS\_00087963"; exon\_number "1";  
oId "CUFF.95024.3"; tss\_id "TSS67012";  
chr8 Cufflinks exon125209944 125210129 . - . gene\_id "XLOC\_053460"; transcript\_id "TCONS\_00087963"; exon\_number "2";  
oId "CUFF.95024.3"; tss\_id "TSS67012";  
chr8 Cufflinks exon125204430 125205791 . - . gene\_id "XLOC\_053460"; transcript\_id "TCONS\_00087964"; exon\_number "1";  
oId "CUFF.95024.4"; tss\_id "TSS67012";  
chr8 Cufflinks exon125210073 125210133 . - . gene\_id "XLOC\_053460"; transcript\_id "TCONS\_00087964"; exon\_number "2";  
oId "CUFF.95024.4"; tss\_id "TSS67012";  
chr8 Cufflinks exon125204430 125205785 . - . gene\_id "XLOC\_053460"; transcript\_id "TCONS\_00087965"; exon\_number "1";  
oId "CUFF.95024.5"; tss\_id "TSS67013";  
chr8 Cufflinks exon125220357 125220562 . - . gene\_id "XLOC\_053460"; transcript\_id "TCONS\_00087965"; exon\_number "2";  
oId "CUFF.95024.5"; tss\_id "TSS67013";  
chr8 Cufflinks exon125259525 125259639 . - . gene\_id "XLOC\_053460"; transcript\_id "TCONS\_00087965"; exon\_number "3";  
oId "CUFF.95024.5"; tss\_id "TSS67013";  
chr8 Cufflinks exon126928966 126933470 . - . gene\_id "XLOC\_053470"; transcript\_id "TCONS\_00087983"; exon\_number "1";  
oId "CUFF.95084.1"; tss\_id "TSS67024";  
chr8 Cufflinks exon126934580 126934791 . - . gene\_id "XLOC\_053470"; transcript\_id "TCONS\_00087983"; exon\_number "2";  
oId "CUFF.95084.1"; tss\_id "TSS67024";  
chr8 Cufflinks exon126948484 126948577 . - . gene\_id "XLOC\_053470"; transcript\_id "TCONS\_00087983"; exon\_number "3";  
oId "CUFF.95084.1"; tss\_id "TSS67024";  
chr8 Cufflinks exon126958177 126958426 . - . gene\_id "XLOC\_053470"; transcript\_id "TCONS\_00087983"; exon\_number "4";  
oId "CUFF.95084.1"; tss\_id "TSS67024";  
chr8 Cufflinks exon126963158 126963462 . - . gene\_id "XLOC\_053470"; transcript\_id "TCONS\_00087983"; exon\_number "5";  
oId "CUFF.95084.1"; tss\_id "TSS67024";  
chr8 Cufflinks exon129788862 129789679 . - . gene\_id "XLOC\_053499"; transcript\_id "TCONS\_00088014"; exon\_number "1";  
oId "CUFF.95170.1"; tss\_id "TSS67053";  
chr8 Cufflinks exon129790445 129791354 . - . gene\_id "XLOC\_053499"; transcript\_id "TCONS\_00088014"; exon\_number "2";  
oId "CUFF.95170.1"; tss\_id "TSS67053";  
chr8 Cufflinks exon130228713 130229652 . - . gene\_id "XLOC\_053578"; transcript\_id "TCONS\_00088093"; exon\_number "1";  
oId "CUFF.95349.1"; tss\_id "TSS67132";  
chr8 Cufflinks exon130235467 130235615 . - . gene\_id "XLOC\_053578"; transcript\_id "TCONS\_00088093"; exon\_number "2";  
oId "CUFF.95349.1"; tss\_id "TSS67132";  
chr8 Cufflinks exon130253423 130253486 . - . gene\_id "XLOC\_053578"; transcript\_id "TCONS\_00088093"; exon\_number "3";  
oId "CUFF.95349.1"; tss\_id "TSS67132";  
chr8 Cufflinks exon130228713 130229652 . - . gene\_id "XLOC\_053578"; transcript\_id "TCONS\_00088094"; exon\_number "1";  
oId "CUFF.95349.2"; tss\_id "TSS67133";

|                                        |           |   |   |   |                                                                         |
|----------------------------------------|-----------|---|---|---|-------------------------------------------------------------------------|
| chr8 Cufflinks exon130253423           | 130253587 | . | - | . | gene_id "XLOC_053578"; transcript_id "TCONS_00088094"; exon_number "2"; |
| oId "CUFF.95349.2"; tss_id "TSS67133"; |           |   |   |   |                                                                         |
| chr8 Cufflinks exon130266713           | 130266741 | . | - | . | gene_id "XLOC_053581"; transcript_id "TCONS_00088098"; exon_number "1"; |
| oId "CUFF.95394.1"; tss_id "TSS67137"; |           |   |   |   |                                                                         |
| chr8 Cufflinks exon130278306           | 130278512 | . | - | . | gene_id "XLOC_053581"; transcript_id "TCONS_00088098"; exon_number "2"; |
| oId "CUFF.95394.1"; tss_id "TSS67137"; |           |   |   |   |                                                                         |
| chr8 Cufflinks exon130280026           | 130280109 | . | - | . | gene_id "XLOC_053581"; transcript_id "TCONS_00088098"; exon_number "3"; |
| oId "CUFF.95394.1"; tss_id "TSS67137"; |           |   |   |   |                                                                         |
| chr8 Cufflinks exon130365050           | 130365226 | . | - | . | gene_id "XLOC_053581"; transcript_id "TCONS_00088098"; exon_number "4"; |
| oId "CUFF.95394.1"; tss_id "TSS67137"; |           |   |   |   |                                                                         |
| chr8 Cufflinks exon130400291           | 130400400 | . | - | . | gene_id "XLOC_053581"; transcript_id "TCONS_00088098"; exon_number "5"; |
| oId "CUFF.95394.1"; tss_id "TSS67137"; |           |   |   |   |                                                                         |
| chr8 Cufflinks exon130363940           | 130365226 | . | - | . | gene_id "XLOC_053581"; transcript_id "TCONS_00088112"; exon_number "1"; |
| oId "CUFF.95394.9"; tss_id "TSS67138"; |           |   |   |   |                                                                         |
| chr8 Cufflinks exon130382553           | 130382623 | . | - | . | gene_id "XLOC_053581"; transcript_id "TCONS_00088112"; exon_number "2"; |
| oId "CUFF.95394.9"; tss_id "TSS67138"; |           |   |   |   |                                                                         |
| chr8 Cufflinks exon130492889           | 130492936 | . | - | . | gene_id "XLOC_053581"; transcript_id "TCONS_00088112"; exon_number "3"; |
| oId "CUFF.95394.9"; tss_id "TSS67138"; |           |   |   |   |                                                                         |
| chr8 Cufflinks exon130692174           | 130692485 | . | - | . | gene_id "XLOC_053581"; transcript_id "TCONS_00088112"; exon_number "4"; |
| oId "CUFF.95394.9"; tss_id "TSS67138"; |           |   |   |   |                                                                         |
| chr8 Cufflinks exon134375428           | 134375669 | . | - | . | gene_id "XLOC_053622"; transcript_id "TCONS_00088164"; exon_number "1"; |
| oId "CUFF.95486.3"; tss_id "TSS67190"; |           |   |   |   |                                                                         |
| chr8 Cufflinks exon134389799           | 134389911 | . | - | . | gene_id "XLOC_053622"; transcript_id "TCONS_00088164"; exon_number "2"; |
| oId "CUFF.95486.3"; tss_id "TSS67190"; |           |   |   |   |                                                                         |
| chr8 Cufflinks exon134392062           | 134392147 | . | - | . | gene_id "XLOC_053622"; transcript_id "TCONS_00088164"; exon_number "3"; |
| oId "CUFF.95486.3"; tss_id "TSS67190"; |           |   |   |   |                                                                         |
| chr8 Cufflinks exon135774869           | 135774895 | . | - | . | gene_id "XLOC_053629"; transcript_id "TCONS_00088180"; exon_number "1"; |
| oId "CUFF.95510.1"; tss_id "TSS67202"; |           |   |   |   |                                                                         |
| chr8 Cufflinks exon135801623           | 135807680 | . | - | . | gene_id "XLOC_053629"; transcript_id "TCONS_00088180"; exon_number "2"; |
| oId "CUFF.95510.1"; tss_id "TSS67202"; |           |   |   |   |                                                                         |
| chr8 Cufflinks exon135811409           | 135812762 | . | - | . | gene_id "XLOC_053629"; transcript_id "TCONS_00088180"; exon_number "3"; |
| oId "CUFF.95510.1"; tss_id "TSS67202"; |           |   |   |   |                                                                         |
| chr8 Cufflinks exon135817233           | 135824951 | . | - | . | gene_id "XLOC_053631"; transcript_id "TCONS_00088183"; exon_number "1"; |
| oId "CUFF.95512.1"; tss_id "TSS67205"; |           |   |   |   |                                                                         |
| chr8 Cufflinks exon135825356           | 135826132 | . | - | . | gene_id "XLOC_053631"; transcript_id "TCONS_00088183"; exon_number "2"; |
| oId "CUFF.95512.1"; tss_id "TSS67205"; |           |   |   |   |                                                                         |
| chr8 Cufflinks exon140613081           | 140613844 | . | - | . | gene_id "XLOC_053637"; transcript_id "TCONS_00088192"; exon_number "1"; |
| oId "CUFF.95531.4"; tss_id "TSS67211"; |           |   |   |   |                                                                         |
| chr8 Cufflinks exon140614346           | 140614379 | . | - | . | gene_id "XLOC_053637"; transcript_id "TCONS_00088192"; exon_number "2"; |
| oId "CUFF.95531.4"; tss_id "TSS67211"; |           |   |   |   |                                                                         |
| chr8 Cufflinks exon140613081           | 140613844 | . | - | . | gene_id "XLOC_053637"; transcript_id "TCONS_00088194"; exon_number "1"; |
| oId "CUFF.95531.2"; tss_id "TSS67211"; |           |   |   |   |                                                                         |
| chr8 Cufflinks exon140614301           | 140614399 | . | - | . | gene_id "XLOC_053637"; transcript_id "TCONS_00088194"; exon_number "2"; |

oId "CUFF.95531.2"; tss\_id "TSS67211";  
chr8 Cufflinks exon140613081 140613844 . - . gene\_id "XLOC\_053637"; transcript\_id "TCONS\_00088193"; exon\_number "1";  
oId "CUFF.95531.1"; tss\_id "TSS67211";  
chr8 Cufflinks exon140614256 140614399 . - . gene\_id "XLOC\_053637"; transcript\_id "TCONS\_00088193"; exon\_number "2";  
oId "CUFF.95531.1"; tss\_id "TSS67211";  
chr8 Cufflinks exon142198048 142208343 . - . gene\_id "XLOC\_053647"; transcript\_id "TCONS\_00088222"; exon\_number "1";  
oId "CUFF.95564.1"; tss\_id "TSS67229";  
chr8 Cufflinks exon142209236 142209325 . - . gene\_id "XLOC\_053647"; transcript\_id "TCONS\_00088222"; exon\_number "2";  
oId "CUFF.95564.1"; tss\_id "TSS67229";  
chr8 Cufflinks exon142212601 142212896 . - . gene\_id "XLOC\_053647"; transcript\_id "TCONS\_00088222"; exon\_number "3";  
oId "CUFF.95564.1"; tss\_id "TSS67229";  
chr8 Cufflinks exon142198048 142207525 . - . gene\_id "XLOC\_053647"; transcript\_id "TCONS\_00088223"; exon\_number "1";  
oId "CUFF.95564.2"; tss\_id "TSS67230";  
chr8 Cufflinks exon142208088 142208343 . - . gene\_id "XLOC\_053647"; transcript\_id "TCONS\_00088223"; exon\_number "2";  
oId "CUFF.95564.2"; tss\_id "TSS67230";  
chr8 Cufflinks exon142208809 142208909 . - . gene\_id "XLOC\_053647"; transcript\_id "TCONS\_00088223"; exon\_number "3";  
oId "CUFF.95564.2"; tss\_id "TSS67230";  
chr8 Cufflinks exon142209236 142209325 . - . gene\_id "XLOC\_053647"; transcript\_id "TCONS\_00088223"; exon\_number "4";  
oId "CUFF.95564.2"; tss\_id "TSS67230";  
chr8 Cufflinks exon142212601 142213443 . - . gene\_id "XLOC\_053647"; transcript\_id "TCONS\_00088223"; exon\_number "5";  
oId "CUFF.95564.2"; tss\_id "TSS67230";  
chr8 Cufflinks exon144271233 144272111 . - . gene\_id "XLOC\_053669"; transcript\_id "TCONS\_00088270"; exon\_number "1";  
oId "CUFF.95641.1"; tss\_id "TSS67265";  
chr8 Cufflinks exon144272817 144272828 . - . gene\_id "XLOC\_053669"; transcript\_id "TCONS\_00088270"; exon\_number "2";  
oId "CUFF.95641.1"; tss\_id "TSS67265";  
chr8 Cufflinks exon144362693 144363167 . - . gene\_id "XLOC\_053670"; transcript\_id "TCONS\_00088271"; exon\_number "1";  
oId "CUFF.95656.3"; tss\_id "TSS67266";  
chr8 Cufflinks exon144363263 144363870 . - . gene\_id "XLOC\_053670"; transcript\_id "TCONS\_00088271"; exon\_number "2";  
oId "CUFF.95656.3"; tss\_id "TSS67266";  
chr8 Cufflinks exon145990971 145991379 . - . gene\_id "XLOC\_053731"; transcript\_id "TCONS\_00088390"; exon\_number "1";  
oId "CUFF.95844.1"; tss\_id "TSS67354";  
chr8 Cufflinks exon145994046 145994069 . - . gene\_id "XLOC\_053731"; transcript\_id "TCONS\_00088390"; exon\_number "2";  
oId "CUFF.95844.1"; tss\_id "TSS67354";  
chr8 Cufflinks exon146037186 146038693 . - . gene\_id "XLOC\_053734"; transcript\_id "TCONS\_00088404"; exon\_number "1";  
oId "CUFF.95852.7"; tss\_id "TSS67360";  
chr8 Cufflinks exon146039701 146039809 . - . gene\_id "XLOC\_053734"; transcript\_id "TCONS\_00088404"; exon\_number "2";  
oId "CUFF.95852.7"; tss\_id "TSS67360";  
chr8 Cufflinks exon146041345 146041493 . - . gene\_id "XLOC\_053734"; transcript\_id "TCONS\_00088404"; exon\_number "3";  
oId "CUFF.95852.7"; tss\_id "TSS67360";  
chr8 Cufflinks exon146050698 146052637 . - . gene\_id "XLOC\_053734"; transcript\_id "TCONS\_00088404"; exon\_number "4";  
oId "CUFF.95852.7"; tss\_id "TSS67360";  
chr8 Cufflinks exon146037186 146038693 . - . gene\_id "XLOC\_053734"; transcript\_id "TCONS\_00088403"; exon\_number "1";  
oId "CUFF.95852.6"; tss\_id "TSS67360";



chr8 Cufflinks exon146050698 146052637 . - . gene\_id "XLOC\_053734"; transcript\_id "TCONS\_00088403"; exon\_number "2";  
oId "CUFF.95852.6"; tss\_id "TSS67360";

chr8 Cufflinks exon146041064 146041493 . - . gene\_id "XLOC\_053734"; transcript\_id "TCONS\_00088405"; exon\_number "1";  
oId "CUFF.95852.8"; tss\_id "TSS67360";

chr8 Cufflinks exon146050698 146052592 . - . gene\_id "XLOC\_053734"; transcript\_id "TCONS\_00088405"; exon\_number "2";  
oId "CUFF.95852.8"; tss\_id "TSS67360";

chr8 Cufflinks exon146044551 146045586 . - . gene\_id "XLOC\_053734"; transcript\_id "TCONS\_00088407"; exon\_number "1";  
oId "CUFF.95852.9"; tss\_id "TSS67358";

chr8 Cufflinks exon146046810 146047938 . - . gene\_id "XLOC\_053734"; transcript\_id "TCONS\_00088407"; exon\_number "2";  
oId "CUFF.95852.9"; tss\_id "TSS67358";

chr8 Cufflinks exon146050770 146050797 . - . gene\_id "XLOC\_053734"; transcript\_id "TCONS\_00088410"; exon\_number "1";  
oId "CUFF.95852.13"; tss\_id "TSS67360";

chr8 Cufflinks exon146052078 146052644 . - . gene\_id "XLOC\_053734"; transcript\_id "TCONS\_00088410"; exon\_number "2";  
oId "CUFF.95852.13"; tss\_id "TSS67360";

chr9 Cufflinks exon3526100 3526145 . + . gene\_id "XLOC\_053778"; transcript\_id "TCONS\_00088484"; exon\_number "1"; oId  
"CUFF.96052.2"; tss\_id "TSS67418";

chr9 Cufflinks exon3546778 3546912 . + . gene\_id "XLOC\_053778"; transcript\_id "TCONS\_00088484"; exon\_number "2"; oId  
"CUFF.96052.2"; tss\_id "TSS67418";

chr9 Cufflinks exon3602523 3602584 . + . gene\_id "XLOC\_053778"; transcript\_id "TCONS\_00088484"; exon\_number "3"; oId  
"CUFF.96052.2"; tss\_id "TSS67418";

chr9 Cufflinks exon3671474 3671645 . + . gene\_id "XLOC\_053778"; transcript\_id "TCONS\_00088484"; exon\_number "4"; oId  
"CUFF.96052.2"; tss\_id "TSS67418";

chr9 Cufflinks exon3674468 3678991 . + . gene\_id "XLOC\_053778"; transcript\_id "TCONS\_00088484"; exon\_number "5"; oId  
"CUFF.96052.2"; tss\_id "TSS67418";

chr9 Cufflinks exon3526138 3526777 . + . gene\_id "XLOC\_053778"; transcript\_id "TCONS\_00088485"; exon\_number "1"; oId  
"CUFF.96052.3"; tss\_id "TSS67418";

chr9 Cufflinks exon3546778 3546912 . + . gene\_id "XLOC\_053778"; transcript\_id "TCONS\_00088485"; exon\_number "2"; oId  
"CUFF.96052.3"; tss\_id "TSS67418";

chr9 Cufflinks exon3552595 3553545 . + . gene\_id "XLOC\_053778"; transcript\_id "TCONS\_00088485"; exon\_number "3"; oId  
"CUFF.96052.3"; tss\_id "TSS67418";

chr9 Cufflinks exon3526156 3526777 . + . gene\_id "XLOC\_053778"; transcript\_id "TCONS\_00088486"; exon\_number "1"; oId  
"CUFF.96052.4"; tss\_id "TSS67419";

chr9 Cufflinks exon3530206 3532722 . + . gene\_id "XLOC\_053778"; transcript\_id "TCONS\_00088486"; exon\_number "2"; oId  
"CUFF.96052.4"; tss\_id "TSS67419";

chr9 Cufflinks exon3633413 3633466 . + . gene\_id "XLOC\_053778"; transcript\_id "TCONS\_00088494"; exon\_number "1"; oId  
"CUFF.96052.5"; tss\_id "TSS67420";

chr9 Cufflinks exon3668264 3668408 . + . gene\_id "XLOC\_053778"; transcript\_id "TCONS\_00088494"; exon\_number "2"; oId  
"CUFF.96052.5"; tss\_id "TSS67420";

chr9 Cufflinks exon3671474 3671645 . + . gene\_id "XLOC\_053778"; transcript\_id "TCONS\_00088494"; exon\_number "3"; oId  
"CUFF.96052.5"; tss\_id "TSS67420";

chr9 Cufflinks exon3674411 3678991 . + . gene\_id "XLOC\_053778"; transcript\_id "TCONS\_00088494"; exon\_number "4"; oId  
"CUFF.96052.5"; tss\_id "TSS67420";

chr9 Cufflinks exon3633441 3633465 . + . gene\_id "XLOC\_053778"; transcript\_id "TCONS\_00088495"; exon\_number "1"; oId

|                                                                              |   |   |                                                                                                                   |
|------------------------------------------------------------------------------|---|---|-------------------------------------------------------------------------------------------------------------------|
| "CUFF.96052.6"; tss_id "TSS67420";<br>chr9 Cufflinks exon3671474 3671645 .   | + | . | gene_id "XLOC_053778"; transcript_id "TCONS_00088495"; exon_number "2"; oId                                       |
| "CUFF.96052.6"; tss_id "TSS67420";<br>chr9 Cufflinks exon3674411 3678991 .   | + | . | gene_id "XLOC_053778"; transcript_id "TCONS_00088495"; exon_number "3"; oId                                       |
| "CUFF.96052.6"; tss_id "TSS67420";<br>chr9 Cufflinks exon3666904 3668408 .   | + | . | gene_id "XLOC_053778"; transcript_id "TCONS_00088503"; exon_number "1"; oId                                       |
| "CUFF.96052.7"; tss_id "TSS67421";<br>chr9 Cufflinks exon3671474 3671645 .   | + | . | gene_id "XLOC_053778"; transcript_id "TCONS_00088503"; exon_number "2"; oId                                       |
| "CUFF.96052.7"; tss_id "TSS67421";<br>chr9 Cufflinks exon3674411 3678991 .   | + | . | gene_id "XLOC_053778"; transcript_id "TCONS_00088503"; exon_number "3"; oId                                       |
| "CUFF.96052.7"; tss_id "TSS67421";<br>chr9 Cufflinks exon21829416 21829432 . | + | . | gene_id "XLOC_053900"; transcript_id "TCONS_00088672"; exon_number "1";<br>oId "CUFF.96527.1"; tss_id "TSS67566"; |
| chr9 Cufflinks exon22032161 22032672 .                                       | + | . | gene_id "XLOC_053900"; transcript_id "TCONS_00088672"; exon_number "2";<br>oId "CUFF.96527.1"; tss_id "TSS67566"; |
| chr9 Cufflinks exon21994790 21995160 .                                       | + | . | gene_id "XLOC_053909"; transcript_id "TCONS_00088682"; exon_number "1";<br>oId "CUFF.96558.6"; tss_id "TSS67576"; |
| chr9 Cufflinks exon22046750 22046899 .                                       | + | . | gene_id "XLOC_053909"; transcript_id "TCONS_00088682"; exon_number "2";<br>oId "CUFF.96558.6"; tss_id "TSS67576"; |
| chr9 Cufflinks exon22049105 22049227 .                                       | + | . | gene_id "XLOC_053909"; transcript_id "TCONS_00088682"; exon_number "3";<br>oId "CUFF.96558.6"; tss_id "TSS67576"; |
| chr9 Cufflinks exon22056251 22056386 .                                       | + | . | gene_id "XLOC_053909"; transcript_id "TCONS_00088682"; exon_number "4";<br>oId "CUFF.96558.6"; tss_id "TSS67576"; |
| chr9 Cufflinks exon22063943 22064017 .                                       | + | . | gene_id "XLOC_053909"; transcript_id "TCONS_00088682"; exon_number "5";<br>oId "CUFF.96558.6"; tss_id "TSS67576"; |
| chr9 Cufflinks exon22077678 22077889 .                                       | + | . | gene_id "XLOC_053909"; transcript_id "TCONS_00088682"; exon_number "6";<br>oId "CUFF.96558.6"; tss_id "TSS67576"; |
| chr9 Cufflinks exon21994790 21995160 .                                       | + | . | gene_id "XLOC_053909"; transcript_id "TCONS_00088681"; exon_number "1";<br>oId "CUFF.96558.4"; tss_id "TSS67576"; |
| chr9 Cufflinks exon22046750 22046899 .                                       | + | . | gene_id "XLOC_053909"; transcript_id "TCONS_00088681"; exon_number "2";<br>oId "CUFF.96558.4"; tss_id "TSS67576"; |
| chr9 Cufflinks exon22049105 22049227 .                                       | + | . | gene_id "XLOC_053909"; transcript_id "TCONS_00088681"; exon_number "3";<br>oId "CUFF.96558.4"; tss_id "TSS67576"; |
| chr9 Cufflinks exon22056251 22056386 .                                       | + | . | gene_id "XLOC_053909"; transcript_id "TCONS_00088681"; exon_number "4";<br>oId "CUFF.96558.4"; tss_id "TSS67576"; |
| chr9 Cufflinks exon22077678 22077889 .                                       | + | . | gene_id "XLOC_053909"; transcript_id "TCONS_00088681"; exon_number "5";<br>oId "CUFF.96558.4"; tss_id "TSS67576"; |
| chr9 Cufflinks exon21994790 21995160 .                                       | + | . | gene_id "XLOC_053909"; transcript_id "TCONS_00088688"; exon_number "1";<br>oId "CUFF.96558.8"; tss_id "TSS67576"; |
| chr9 Cufflinks exon22046750 22046899 .                                       | + | . | gene_id "XLOC_053909"; transcript_id "TCONS_00088688"; exon_number "2";<br>oId "CUFF.96558.8"; tss_id "TSS67576"; |
| chr9 Cufflinks exon22049105 22049227 .                                       | + | . | gene_id "XLOC_053909"; transcript_id "TCONS_00088688"; exon_number "3";<br>oId "CUFF.96558.8"; tss_id "TSS67576"; |

|                                        |          |   |   |   |                                                                         |
|----------------------------------------|----------|---|---|---|-------------------------------------------------------------------------|
| chr9 Cufflinks exon22056251            | 22056386 | . | + | . | gene_id "XLOC_053909"; transcript_id "TCONS_00088688"; exon_number "4"; |
| oId "CUFF.96558.8"; tss_id "TSS67576"; |          |   |   |   |                                                                         |
| chr9 Cufflinks exon22112319            | 22112394 | . | + | . | gene_id "XLOC_053909"; transcript_id "TCONS_00088688"; exon_number "5"; |
| oId "CUFF.96558.8"; tss_id "TSS67576"; |          |   |   |   |                                                                         |
| chr9 Cufflinks exon22113665            | 22113798 | . | + | . | gene_id "XLOC_053909"; transcript_id "TCONS_00088688"; exon_number "6"; |
| oId "CUFF.96558.8"; tss_id "TSS67576"; |          |   |   |   |                                                                         |
| chr9 Cufflinks exon22118643            | 22118766 | . | + | . | gene_id "XLOC_053909"; transcript_id "TCONS_00088688"; exon_number "7"; |
| oId "CUFF.96558.8"; tss_id "TSS67576"; |          |   |   |   |                                                                         |
| chr9 Cufflinks exon22120199            | 22120409 | . | + | . | gene_id "XLOC_053909"; transcript_id "TCONS_00088688"; exon_number "8"; |
| oId "CUFF.96558.8"; tss_id "TSS67576"; |          |   |   |   |                                                                         |
| chr9 Cufflinks exon22120503            | 22121093 | . | + | . | gene_id "XLOC_053909"; transcript_id "TCONS_00088688"; exon_number "9"; |
| oId "CUFF.96558.8"; tss_id "TSS67576"; |          |   |   |   |                                                                         |
| chr9 Cufflinks exon21994790            | 21995160 | . | + | . | gene_id "XLOC_053909"; transcript_id "TCONS_00088686"; exon_number "1"; |
| oId "CUFF.96558.3"; tss_id "TSS67576"; |          |   |   |   |                                                                         |
| chr9 Cufflinks exon22046750            | 22046899 | . | + | . | gene_id "XLOC_053909"; transcript_id "TCONS_00088686"; exon_number "2"; |
| oId "CUFF.96558.3"; tss_id "TSS67576"; |          |   |   |   |                                                                         |
| chr9 Cufflinks exon22049105            | 22049227 | . | + | . | gene_id "XLOC_053909"; transcript_id "TCONS_00088686"; exon_number "3"; |
| oId "CUFF.96558.3"; tss_id "TSS67576"; |          |   |   |   |                                                                         |
| chr9 Cufflinks exon22056251            | 22056386 | . | + | . | gene_id "XLOC_053909"; transcript_id "TCONS_00088686"; exon_number "4"; |
| oId "CUFF.96558.3"; tss_id "TSS67576"; |          |   |   |   |                                                                         |
| chr9 Cufflinks exon22112319            | 22112394 | . | + | . | gene_id "XLOC_053909"; transcript_id "TCONS_00088686"; exon_number "5"; |
| oId "CUFF.96558.3"; tss_id "TSS67576"; |          |   |   |   |                                                                         |
| chr9 Cufflinks exon22118643            | 22118766 | . | + | . | gene_id "XLOC_053909"; transcript_id "TCONS_00088686"; exon_number "6"; |
| oId "CUFF.96558.3"; tss_id "TSS67576"; |          |   |   |   |                                                                         |
| chr9 Cufflinks exon22120199            | 22120409 | . | + | . | gene_id "XLOC_053909"; transcript_id "TCONS_00088686"; exon_number "7"; |
| oId "CUFF.96558.3"; tss_id "TSS67576"; |          |   |   |   |                                                                         |
| chr9 Cufflinks exon22120503            | 22121093 | . | + | . | gene_id "XLOC_053909"; transcript_id "TCONS_00088686"; exon_number "8"; |
| oId "CUFF.96558.3"; tss_id "TSS67576"; |          |   |   |   |                                                                         |
| chr9 Cufflinks exon21994790            | 21995160 | . | + | . | gene_id "XLOC_053909"; transcript_id "TCONS_00088687"; exon_number "1"; |
| oId "CUFF.96558.5"; tss_id "TSS67576"; |          |   |   |   |                                                                         |
| chr9 Cufflinks exon22046750            | 22046899 | . | + | . | gene_id "XLOC_053909"; transcript_id "TCONS_00088687"; exon_number "2"; |
| oId "CUFF.96558.5"; tss_id "TSS67576"; |          |   |   |   |                                                                         |
| chr9 Cufflinks exon22049105            | 22049227 | . | + | . | gene_id "XLOC_053909"; transcript_id "TCONS_00088687"; exon_number "3"; |
| oId "CUFF.96558.5"; tss_id "TSS67576"; |          |   |   |   |                                                                         |
| chr9 Cufflinks exon22097257            | 22097363 | . | + | . | gene_id "XLOC_053909"; transcript_id "TCONS_00088687"; exon_number "4"; |
| oId "CUFF.96558.5"; tss_id "TSS67576"; |          |   |   |   |                                                                         |
| chr9 Cufflinks exon22112319            | 22112394 | . | + | . | gene_id "XLOC_053909"; transcript_id "TCONS_00088687"; exon_number "5"; |
| oId "CUFF.96558.5"; tss_id "TSS67576"; |          |   |   |   |                                                                         |
| chr9 Cufflinks exon22113665            | 22113798 | . | + | . | gene_id "XLOC_053909"; transcript_id "TCONS_00088687"; exon_number "6"; |
| oId "CUFF.96558.5"; tss_id "TSS67576"; |          |   |   |   |                                                                         |
| chr9 Cufflinks exon22118643            | 22118766 | . | + | . | gene_id "XLOC_053909"; transcript_id "TCONS_00088687"; exon_number "7"; |
| oId "CUFF.96558.5"; tss_id "TSS67576"; |          |   |   |   |                                                                         |
| chr9 Cufflinks exon22120199            | 22120409 | . | + | . | gene_id "XLOC_053909"; transcript_id "TCONS_00088687"; exon_number "8"; |

|                                        |   |   |   |                                                                         |  |
|----------------------------------------|---|---|---|-------------------------------------------------------------------------|--|
| oId "CUFF.96558.5"; tss_id "TSS67576"; |   |   |   |                                                                         |  |
| chr9 Cufflinks exon22120503 22121093   | . | + | . | gene_id "XLOC_053909"; transcript_id "TCONS_00088687"; exon_number "9"; |  |
| oId "CUFF.96558.5"; tss_id "TSS67576"; |   |   |   |                                                                         |  |
| chr9 Cufflinks exon33617774 33617873   | . | + | . | gene_id "XLOC_053972"; transcript_id "TCONS_00088757"; exon_number "1"; |  |
| oId "CUFF.96828.1"; tss_id "TSS67639"; |   |   |   |                                                                         |  |
| chr9 Cufflinks exon33618203 33618525   | . | + | . | gene_id "XLOC_053972"; transcript_id "TCONS_00088757"; exon_number "2"; |  |
| oId "CUFF.96828.1"; tss_id "TSS67639"; |   |   |   |                                                                         |  |
| chr9 Cufflinks exon37359914 37366599   | . | + | . | gene_id "XLOC_054056"; transcript_id "TCONS_00088878"; exon_number "1"; |  |
| oId "CUFF.97126.2"; tss_id "TSS67730"; |   |   |   |                                                                         |  |
| chr9 Cufflinks exon37382174 37382277   | . | + | . | gene_id "XLOC_054056"; transcript_id "TCONS_00088878"; exon_number "2"; |  |
| oId "CUFF.97126.2"; tss_id "TSS67730"; |   |   |   |                                                                         |  |
| chr9 Cufflinks exon45359187 45359459   | . | + | . | gene_id "XLOC_054111"; transcript_id "TCONS_00088950"; exon_number "1"; |  |
| oId "CUFF.97314.3"; tss_id "TSS67793"; |   |   |   |                                                                         |  |
| chr9 Cufflinks exon45362465 45362842   | . | + | . | gene_id "XLOC_054111"; transcript_id "TCONS_00088950"; exon_number "2"; |  |
| oId "CUFF.97314.3"; tss_id "TSS67793"; |   |   |   |                                                                         |  |
| chr9 Cufflinks exon45363282 45364380   | . | + | . | gene_id "XLOC_054111"; transcript_id "TCONS_00088950"; exon_number "3"; |  |
| oId "CUFF.97314.3"; tss_id "TSS67793"; |   |   |   |                                                                         |  |
| chr9 Cufflinks exon66457289 66457355   | . | + | . | gene_id "XLOC_054147"; transcript_id "TCONS_00088994"; exon_number "1"; |  |
| oId "CUFF.97426.1"; tss_id "TSS67832"; |   |   |   |                                                                         |  |
| chr9 Cufflinks exon66459808 66459964   | . | + | . | gene_id "XLOC_054147"; transcript_id "TCONS_00088994"; exon_number "2"; |  |
| oId "CUFF.97426.1"; tss_id "TSS67832"; |   |   |   |                                                                         |  |
| chr9 Cufflinks exon66465592 66467413   | . | + | . | gene_id "XLOC_054147"; transcript_id "TCONS_00088994"; exon_number "3"; |  |
| oId "CUFF.97426.1"; tss_id "TSS67832"; |   |   |   |                                                                         |  |
| chr9 Cufflinks exon66467763 66467899   | . | + | . | gene_id "XLOC_054147"; transcript_id "TCONS_00088994"; exon_number "4"; |  |
| oId "CUFF.97426.1"; tss_id "TSS67832"; |   |   |   |                                                                         |  |
| chr9 Cufflinks exon66468617 66469310   | . | + | . | gene_id "XLOC_054147"; transcript_id "TCONS_00088994"; exon_number "5"; |  |
| oId "CUFF.97426.1"; tss_id "TSS67832"; |   |   |   |                                                                         |  |
| chr9 Cufflinks exon69065314 69066004   | . | + | . | gene_id "XLOC_054176"; transcript_id "TCONS_00089037"; exon_number "1"; |  |
| oId "CUFF.97619.2"; tss_id "TSS67865"; |   |   |   |                                                                         |  |
| chr9 Cufflinks exon69066482 69066663   | . | + | . | gene_id "XLOC_054176"; transcript_id "TCONS_00089037"; exon_number "2"; |  |
| oId "CUFF.97619.2"; tss_id "TSS67865"; |   |   |   |                                                                         |  |
| chr9 Cufflinks exon69067862 69067928   | . | + | . | gene_id "XLOC_054176"; transcript_id "TCONS_00089037"; exon_number "3"; |  |
| oId "CUFF.97619.2"; tss_id "TSS67865"; |   |   |   |                                                                         |  |
| chr9 Cufflinks exon69080669 69080838   | . | + | . | gene_id "XLOC_054176"; transcript_id "TCONS_00089037"; exon_number "4"; |  |
| oId "CUFF.97619.2"; tss_id "TSS67865"; |   |   |   |                                                                         |  |
| chr9 Cufflinks exon69082110 69082235   | . | + | . | gene_id "XLOC_054176"; transcript_id "TCONS_00089037"; exon_number "5"; |  |
| oId "CUFF.97619.2"; tss_id "TSS67865"; |   |   |   |                                                                         |  |
| chr9 Cufflinks exon69084846 69084959   | . | + | . | gene_id "XLOC_054176"; transcript_id "TCONS_00089037"; exon_number "6"; |  |
| oId "CUFF.97619.2"; tss_id "TSS67865"; |   |   |   |                                                                         |  |
| chr9 Cufflinks exon69106063 69106251   | . | + | . | gene_id "XLOC_054176"; transcript_id "TCONS_00089037"; exon_number "7"; |  |
| oId "CUFF.97619.2"; tss_id "TSS67865"; |   |   |   |                                                                         |  |
| chr9 Cufflinks exon69107168 69109652   | . | + | . | gene_id "XLOC_054176"; transcript_id "TCONS_00089037"; exon_number "8"; |  |
| oId "CUFF.97619.2"; tss_id "TSS67865"; |   |   |   |                                                                         |  |

|                                        |          |   |   |   |                                                                         |
|----------------------------------------|----------|---|---|---|-------------------------------------------------------------------------|
| chr9 Cufflinks exon69065412            | 69066004 | . | + | . | gene_id "XLOC_054176"; transcript_id "TCONS_00089038"; exon_number "1"; |
| oId "CUFF.97619.5"; tss_id "TSS67865"; |          |   |   |   |                                                                         |
| chr9 Cufflinks exon69066482            | 69066663 | . | + | . | gene_id "XLOC_054176"; transcript_id "TCONS_00089038"; exon_number "2"; |
| oId "CUFF.97619.5"; tss_id "TSS67865"; |          |   |   |   |                                                                         |
| chr9 Cufflinks exon69067862            | 69067928 | . | + | . | gene_id "XLOC_054176"; transcript_id "TCONS_00089038"; exon_number "3"; |
| oId "CUFF.97619.5"; tss_id "TSS67865"; |          |   |   |   |                                                                         |
| chr9 Cufflinks exon69080669            | 69080838 | . | + | . | gene_id "XLOC_054176"; transcript_id "TCONS_00089038"; exon_number "4"; |
| oId "CUFF.97619.5"; tss_id "TSS67865"; |          |   |   |   |                                                                         |
| chr9 Cufflinks exon69082110            | 69082235 | . | + | . | gene_id "XLOC_054176"; transcript_id "TCONS_00089038"; exon_number "5"; |
| oId "CUFF.97619.5"; tss_id "TSS67865"; |          |   |   |   |                                                                         |
| chr9 Cufflinks exon69084846            | 69084959 | . | + | . | gene_id "XLOC_054176"; transcript_id "TCONS_00089038"; exon_number "6"; |
| oId "CUFF.97619.5"; tss_id "TSS67865"; |          |   |   |   |                                                                         |
| chr9 Cufflinks exon69088253            | 69088415 | . | + | . | gene_id "XLOC_054176"; transcript_id "TCONS_00089038"; exon_number "7"; |
| oId "CUFF.97619.5"; tss_id "TSS67865"; |          |   |   |   |                                                                         |
| chr9 Cufflinks exon69106063            | 69106251 | . | + | . | gene_id "XLOC_054176"; transcript_id "TCONS_00089038"; exon_number "8"; |
| oId "CUFF.97619.5"; tss_id "TSS67865"; |          |   |   |   |                                                                         |
| chr9 Cufflinks exon69107168            | 69109652 | . | + | . | gene_id "XLOC_054176"; transcript_id "TCONS_00089038"; exon_number "9"; |
| oId "CUFF.97619.5"; tss_id "TSS67865"; |          |   |   |   |                                                                         |
| chr9 Cufflinks exon69065449            | 69066004 | . | + | . | gene_id "XLOC_054176"; transcript_id "TCONS_00089042"; exon_number "1"; |
| oId "CUFF.97619.9"; tss_id "TSS67866"; |          |   |   |   |                                                                         |
| chr9 Cufflinks exon69067862            | 69067929 | . | + | . | gene_id "XLOC_054176"; transcript_id "TCONS_00089042"; exon_number "2"; |
| oId "CUFF.97619.9"; tss_id "TSS67866"; |          |   |   |   |                                                                         |
| chr9 Cufflinks exon69082111            | 69082235 | . | + | . | gene_id "XLOC_054176"; transcript_id "TCONS_00089042"; exon_number "3"; |
| oId "CUFF.97619.9"; tss_id "TSS67866"; |          |   |   |   |                                                                         |
| chr9 Cufflinks exon69084846            | 69084959 | . | + | . | gene_id "XLOC_054176"; transcript_id "TCONS_00089042"; exon_number "4"; |
| oId "CUFF.97619.9"; tss_id "TSS67866"; |          |   |   |   |                                                                         |
| chr9 Cufflinks exon69106063            | 69106251 | . | + | . | gene_id "XLOC_054176"; transcript_id "TCONS_00089042"; exon_number "5"; |
| oId "CUFF.97619.9"; tss_id "TSS67866"; |          |   |   |   |                                                                         |
| chr9 Cufflinks exon69107168            | 69109652 | . | + | . | gene_id "XLOC_054176"; transcript_id "TCONS_00089042"; exon_number "6"; |
| oId "CUFF.97619.9"; tss_id "TSS67866"; |          |   |   |   |                                                                         |
| chr9 Cufflinks exon69065449            | 69066004 | . | + | . | gene_id "XLOC_054176"; transcript_id "TCONS_00089041"; exon_number "1"; |
| oId "CUFF.97619.7"; tss_id "TSS67866"; |          |   |   |   |                                                                         |
| chr9 Cufflinks exon69066482            | 69066663 | . | + | . | gene_id "XLOC_054176"; transcript_id "TCONS_00089041"; exon_number "2"; |
| oId "CUFF.97619.7"; tss_id "TSS67866"; |          |   |   |   |                                                                         |
| chr9 Cufflinks exon69067862            | 69067928 | . | + | . | gene_id "XLOC_054176"; transcript_id "TCONS_00089041"; exon_number "3"; |
| oId "CUFF.97619.7"; tss_id "TSS67866"; |          |   |   |   |                                                                         |
| chr9 Cufflinks exon69082110            | 69082235 | . | + | . | gene_id "XLOC_054176"; transcript_id "TCONS_00089041"; exon_number "4"; |
| oId "CUFF.97619.7"; tss_id "TSS67866"; |          |   |   |   |                                                                         |
| chr9 Cufflinks exon69084846            | 69084959 | . | + | . | gene_id "XLOC_054176"; transcript_id "TCONS_00089041"; exon_number "5"; |
| oId "CUFF.97619.7"; tss_id "TSS67866"; |          |   |   |   |                                                                         |
| chr9 Cufflinks exon69106063            | 69106251 | . | + | . | gene_id "XLOC_054176"; transcript_id "TCONS_00089041"; exon_number "6"; |
| oId "CUFF.97619.7"; tss_id "TSS67866"; |          |   |   |   |                                                                         |
| chr9 Cufflinks exon69107113            | 69109652 | . | + | . | gene_id "XLOC_054176"; transcript_id "TCONS_00089041"; exon_number "7"; |

|                                         |          |   |   |   |                                                                         |
|-----------------------------------------|----------|---|---|---|-------------------------------------------------------------------------|
| oId "CUFF.97619.7"; tss_id "TSS67866";  |          |   |   |   |                                                                         |
| chr9 Cufflinks exon69065449             | 69065708 | . | + | . | gene_id "XLOC_054176"; transcript_id "TCONS_00089043"; exon_number "1"; |
| oId "CUFF.97619.6"; tss_id "TSS67866";  |          |   |   |   |                                                                         |
| chr9 Cufflinks exon69067862             | 69067936 | . | + | . | gene_id "XLOC_054176"; transcript_id "TCONS_00089043"; exon_number "2"; |
| oId "CUFF.97619.6"; tss_id "TSS67866";  |          |   |   |   |                                                                         |
| chr9 Cufflinks exon69082118             | 69082235 | . | + | . | gene_id "XLOC_054176"; transcript_id "TCONS_00089043"; exon_number "3"; |
| oId "CUFF.97619.6"; tss_id "TSS67866";  |          |   |   |   |                                                                         |
| chr9 Cufflinks exon69084846             | 69084959 | . | + | . | gene_id "XLOC_054176"; transcript_id "TCONS_00089043"; exon_number "4"; |
| oId "CUFF.97619.6"; tss_id "TSS67866";  |          |   |   |   |                                                                         |
| chr9 Cufflinks exon69106063             | 69106251 | . | + | . | gene_id "XLOC_054176"; transcript_id "TCONS_00089043"; exon_number "5"; |
| oId "CUFF.97619.6"; tss_id "TSS67866";  |          |   |   |   |                                                                         |
| chr9 Cufflinks exon69107113             | 69107286 | . | + | . | gene_id "XLOC_054176"; transcript_id "TCONS_00089043"; exon_number "6"; |
| oId "CUFF.97619.6"; tss_id "TSS67866";  |          |   |   |   |                                                                         |
| chr9 Cufflinks exon69110878             | 69110943 | . | + | . | gene_id "XLOC_054176"; transcript_id "TCONS_00089043"; exon_number "7"; |
| oId "CUFF.97619.6"; tss_id "TSS67866";  |          |   |   |   |                                                                         |
| chr9 Cufflinks exon69065461             | 69065708 | . | + | . | gene_id "XLOC_054176"; transcript_id "TCONS_00089045"; exon_number "1"; |
| oId "CUFF.97619.11"; tss_id "TSS67866"; |          |   |   |   |                                                                         |
| chr9 Cufflinks exon69067862             | 69067928 | . | + | . | gene_id "XLOC_054176"; transcript_id "TCONS_00089045"; exon_number "2"; |
| oId "CUFF.97619.11"; tss_id "TSS67866"; |          |   |   |   |                                                                         |
| chr9 Cufflinks exon69080669             | 69080838 | . | + | . | gene_id "XLOC_054176"; transcript_id "TCONS_00089045"; exon_number "3"; |
| oId "CUFF.97619.11"; tss_id "TSS67866"; |          |   |   |   |                                                                         |
| chr9 Cufflinks exon69084846             | 69084959 | . | + | . | gene_id "XLOC_054176"; transcript_id "TCONS_00089045"; exon_number "4"; |
| oId "CUFF.97619.11"; tss_id "TSS67866"; |          |   |   |   |                                                                         |
| chr9 Cufflinks exon69106063             | 69106251 | . | + | . | gene_id "XLOC_054176"; transcript_id "TCONS_00089045"; exon_number "5"; |
| oId "CUFF.97619.11"; tss_id "TSS67866"; |          |   |   |   |                                                                         |
| chr9 Cufflinks exon69107168             | 69109652 | . | + | . | gene_id "XLOC_054176"; transcript_id "TCONS_00089045"; exon_number "6"; |
| oId "CUFF.97619.11"; tss_id "TSS67866"; |          |   |   |   |                                                                         |
| chr9 Cufflinks exon69065468             | 69066004 | . | + | . | gene_id "XLOC_054176"; transcript_id "TCONS_00089046"; exon_number "1"; |
| oId "CUFF.97619.12"; tss_id "TSS67866"; |          |   |   |   |                                                                         |
| chr9 Cufflinks exon69067862             | 69067928 | . | + | . | gene_id "XLOC_054176"; transcript_id "TCONS_00089046"; exon_number "2"; |
| oId "CUFF.97619.12"; tss_id "TSS67866"; |          |   |   |   |                                                                         |
| chr9 Cufflinks exon69080669             | 69080838 | . | + | . | gene_id "XLOC_054176"; transcript_id "TCONS_00089046"; exon_number "3"; |
| oId "CUFF.97619.12"; tss_id "TSS67866"; |          |   |   |   |                                                                         |
| chr9 Cufflinks exon69082110             | 69082235 | . | + | . | gene_id "XLOC_054176"; transcript_id "TCONS_00089046"; exon_number "4"; |
| oId "CUFF.97619.12"; tss_id "TSS67866"; |          |   |   |   |                                                                         |
| chr9 Cufflinks exon69084846             | 69084959 | . | + | . | gene_id "XLOC_054176"; transcript_id "TCONS_00089046"; exon_number "5"; |
| oId "CUFF.97619.12"; tss_id "TSS67866"; |          |   |   |   |                                                                         |
| chr9 Cufflinks exon69106063             | 69106251 | . | + | . | gene_id "XLOC_054176"; transcript_id "TCONS_00089046"; exon_number "6"; |
| oId "CUFF.97619.12"; tss_id "TSS67866"; |          |   |   |   |                                                                         |
| chr9 Cufflinks exon69107168             | 69109652 | . | + | . | gene_id "XLOC_054176"; transcript_id "TCONS_00089046"; exon_number "7"; |
| oId "CUFF.97619.12"; tss_id "TSS67866"; |          |   |   |   |                                                                         |
| chr9 Cufflinks exon69065477             | 69066004 | . | + | . | gene_id "XLOC_054176"; transcript_id "TCONS_00089049"; exon_number "1"; |
| oId "CUFF.97619.15"; tss_id "TSS67866"; |          |   |   |   |                                                                         |

|                                         |          |   |   |   |                                                                         |
|-----------------------------------------|----------|---|---|---|-------------------------------------------------------------------------|
| chr9 Cufflinks exon69066482             | 69066663 | . | + | . | gene_id "XLOC_054176"; transcript_id "TCONS_00089049"; exon_number "2"; |
| oId "CUFF.97619.15"; tss_id "TSS67866"; |          |   |   |   |                                                                         |
| chr9 Cufflinks exon69067862             | 69067928 | . | + | . | gene_id "XLOC_054176"; transcript_id "TCONS_00089049"; exon_number "3"; |
| oId "CUFF.97619.15"; tss_id "TSS67866"; |          |   |   |   |                                                                         |
| chr9 Cufflinks exon69080669             | 69080838 | . | + | . | gene_id "XLOC_054176"; transcript_id "TCONS_00089049"; exon_number "4"; |
| oId "CUFF.97619.15"; tss_id "TSS67866"; |          |   |   |   |                                                                         |
| chr9 Cufflinks exon69084846             | 69084959 | . | + | . | gene_id "XLOC_054176"; transcript_id "TCONS_00089049"; exon_number "5"; |
| oId "CUFF.97619.15"; tss_id "TSS67866"; |          |   |   |   |                                                                         |
| chr9 Cufflinks exon69106063             | 69106125 | . | + | . | gene_id "XLOC_054176"; transcript_id "TCONS_00089049"; exon_number "6"; |
| oId "CUFF.97619.15"; tss_id "TSS67866"; |          |   |   |   |                                                                         |
| chr9 Cufflinks exon75972840             | 75972934 | . | + | . | gene_id "XLOC_054239"; transcript_id "TCONS_00089155"; exon_number "1"; |
| oId "CUFF.97884.1"; tss_id "TSS67943";  |          |   |   |   |                                                                         |
| chr9 Cufflinks exon75973724             | 75973823 | . | + | . | gene_id "XLOC_054239"; transcript_id "TCONS_00089155"; exon_number "2"; |
| oId "CUFF.97884.1"; tss_id "TSS67943";  |          |   |   |   |                                                                         |
| chr9 Cufflinks exon75977616             | 75977804 | . | + | . | gene_id "XLOC_054239"; transcript_id "TCONS_00089155"; exon_number "3"; |
| oId "CUFF.97884.1"; tss_id "TSS67943";  |          |   |   |   |                                                                         |
| chr9 Cufflinks exon75978474             | 75980290 | . | + | . | gene_id "XLOC_054239"; transcript_id "TCONS_00089155"; exon_number "4"; |
| oId "CUFF.97884.1"; tss_id "TSS67943";  |          |   |   |   |                                                                         |
| chr9 Cufflinks exon75977298             | 75977804 | . | + | . | gene_id "XLOC_054239"; transcript_id "TCONS_00089159"; exon_number "1"; |
| oId "CUFF.97884.2"; tss_id "TSS67944";  |          |   |   |   |                                                                         |
| chr9 Cufflinks exon75978474             | 75979697 | . | + | . | gene_id "XLOC_054239"; transcript_id "TCONS_00089159"; exon_number "2"; |
| oId "CUFF.97884.2"; tss_id "TSS67944";  |          |   |   |   |                                                                         |
| chr9 Cufflinks exon75981166             | 75981303 | . | + | . | gene_id "XLOC_054239"; transcript_id "TCONS_00089159"; exon_number "3"; |
| oId "CUFF.97884.2"; tss_id "TSS67944";  |          |   |   |   |                                                                         |
| chr9 Cufflinks exon75982190             | 75982282 | . | + | . | gene_id "XLOC_054239"; transcript_id "TCONS_00089159"; exon_number "4"; |
| oId "CUFF.97884.2"; tss_id "TSS67944";  |          |   |   |   |                                                                         |
| chr9 Cufflinks exon75983450             | 75986042 | . | + | . | gene_id "XLOC_054239"; transcript_id "TCONS_00089159"; exon_number "5"; |
| oId "CUFF.97884.2"; tss_id "TSS67944";  |          |   |   |   |                                                                         |
| chr9 Cufflinks exon75980722             | 75981303 | . | + | . | gene_id "XLOC_054239"; transcript_id "TCONS_00089160"; exon_number "1"; |
| oId "CUFF.97884.3"; tss_id "TSS67945";  |          |   |   |   |                                                                         |
| chr9 Cufflinks exon75982190             | 75982282 | . | + | . | gene_id "XLOC_054239"; transcript_id "TCONS_00089160"; exon_number "2"; |
| oId "CUFF.97884.3"; tss_id "TSS67945";  |          |   |   |   |                                                                         |
| chr9 Cufflinks exon75983450             | 75986042 | . | + | . | gene_id "XLOC_054239"; transcript_id "TCONS_00089160"; exon_number "3"; |
| oId "CUFF.97884.3"; tss_id "TSS67945";  |          |   |   |   |                                                                         |
| chr9 Cufflinks exon76188566             | 76188760 | . | + | . | gene_id "XLOC_054244"; transcript_id "TCONS_00089162"; exon_number "1"; |
| oId "CUFF.97895.1"; tss_id "TSS67950";  |          |   |   |   |                                                                         |
| chr9 Cufflinks exon76192785             | 76192868 | . | + | . | gene_id "XLOC_054244"; transcript_id "TCONS_00089162"; exon_number "2"; |
| oId "CUFF.97895.1"; tss_id "TSS67950";  |          |   |   |   |                                                                         |
| chr9 Cufflinks exon76218280             | 76218422 | . | + | . | gene_id "XLOC_054244"; transcript_id "TCONS_00089162"; exon_number "3"; |
| oId "CUFF.97895.1"; tss_id "TSS67950";  |          |   |   |   |                                                                         |
| chr9 Cufflinks exon76221372             | 76228857 | . | + | . | gene_id "XLOC_054244"; transcript_id "TCONS_00089162"; exon_number "4"; |
| oId "CUFF.97895.1"; tss_id "TSS67950";  |          |   |   |   |                                                                         |
| chr9 Cufflinks exon76217825             | 76218422 | . | + | . | gene_id "XLOC_054244"; transcript_id "TCONS_00089166"; exon_number "1"; |

|                                                                                 |   |   |   |                                                                         |
|---------------------------------------------------------------------------------|---|---|---|-------------------------------------------------------------------------|
| oId "CUFF.97895.2"; tss_id "TSS67951";<br>chr9 Cufflinks exon76221372 76228857  | . | + | . | gene_id "XLOC_054244"; transcript_id "TCONS_00089166"; exon_number "2"; |
| oId "CUFF.97895.2"; tss_id "TSS67951";<br>chr9 Cufflinks exon84304628 84304874  | . | + | . | gene_id "XLOC_054319"; transcript_id "TCONS_00089259"; exon_number "1"; |
| oId "CUFF.98104.8"; tss_id "TSS68029";<br>chr9 Cufflinks exon84353768 84354272  | . | + | . | gene_id "XLOC_054319"; transcript_id "TCONS_00089259"; exon_number "2"; |
| oId "CUFF.98104.8"; tss_id "TSS68029";<br>chr9 Cufflinks exon84362883 84362994  | . | + | . | gene_id "XLOC_054319"; transcript_id "TCONS_00089259"; exon_number "3"; |
| oId "CUFF.98104.8"; tss_id "TSS68029";<br>chr9 Cufflinks exon84369957 84371083  | . | + | . | gene_id "XLOC_054319"; transcript_id "TCONS_00089259"; exon_number "4"; |
| oId "CUFF.98104.8"; tss_id "TSS68029";<br>chr9 Cufflinks exon84304628 84304874  | . | + | . | gene_id "XLOC_054319"; transcript_id "TCONS_00089260"; exon_number "1"; |
| oId "CUFF.98104.5"; tss_id "TSS68029";<br>chr9 Cufflinks exon84353768 84354272  | . | + | . | gene_id "XLOC_054319"; transcript_id "TCONS_00089260"; exon_number "2"; |
| oId "CUFF.98104.5"; tss_id "TSS68029";<br>chr9 Cufflinks exon84362883 84362994  | . | + | . | gene_id "XLOC_054319"; transcript_id "TCONS_00089260"; exon_number "3"; |
| oId "CUFF.98104.5"; tss_id "TSS68029";<br>chr9 Cufflinks exon84369957 84370069  | . | + | . | gene_id "XLOC_054319"; transcript_id "TCONS_00089260"; exon_number "4"; |
| oId "CUFF.98104.5"; tss_id "TSS68029";<br>chr9 Cufflinks exon84393327 84393419  | . | + | . | gene_id "XLOC_054319"; transcript_id "TCONS_00089260"; exon_number "5"; |
| oId "CUFF.98104.5"; tss_id "TSS68029";<br>chr9 Cufflinks exon84434735 84440074  | . | + | . | gene_id "XLOC_054319"; transcript_id "TCONS_00089260"; exon_number "6"; |
| oId "CUFF.98104.5"; tss_id "TSS68029";<br>chr9 Cufflinks exon84398968 84399088  | . | + | . | gene_id "XLOC_054319"; transcript_id "TCONS_00089269"; exon_number "1"; |
| oId "CUFF.98104.12"; tss_id "TSS68030";<br>chr9 Cufflinks exon84434735 84440074 | . | + | . | gene_id "XLOC_054319"; transcript_id "TCONS_00089269"; exon_number "2"; |
| oId "CUFF.98104.12"; tss_id "TSS68030";<br>chr9 Cufflinks exon92137402 92138050 | . | + | . | gene_id "XLOC_054379"; transcript_id "TCONS_00089358"; exon_number "1"; |
| oId "CUFF.98347.2"; tss_id "TSS68105";<br>chr9 Cufflinks exon92141807 92141939  | . | + | . | gene_id "XLOC_054379"; transcript_id "TCONS_00089358"; exon_number "2"; |
| oId "CUFF.98347.2"; tss_id "TSS68105";<br>chr9 Cufflinks exon92142747 92142888  | . | + | . | gene_id "XLOC_054379"; transcript_id "TCONS_00089358"; exon_number "3"; |
| oId "CUFF.98347.2"; tss_id "TSS68105";<br>chr9 Cufflinks exon92156466 92156508  | . | + | . | gene_id "XLOC_054379"; transcript_id "TCONS_00089358"; exon_number "4"; |
| oId "CUFF.98347.2"; tss_id "TSS68105";<br>chr9 Cufflinks exon92137530 92138050  | . | + | . | gene_id "XLOC_054379"; transcript_id "TCONS_00089359"; exon_number "1"; |
| oId "CUFF.98347.3"; tss_id "TSS68106";<br>chr9 Cufflinks exon92141807 92141939  | . | + | . | gene_id "XLOC_054379"; transcript_id "TCONS_00089359"; exon_number "2"; |
| oId "CUFF.98347.3"; tss_id "TSS68106";<br>chr9 Cufflinks exon92142747 92142888  | . | + | . | gene_id "XLOC_054379"; transcript_id "TCONS_00089359"; exon_number "3"; |
| oId "CUFF.98347.3"; tss_id "TSS68106";<br>chr9 Cufflinks exon92143147 92144377  | . | + | . | gene_id "XLOC_054379"; transcript_id "TCONS_00089359"; exon_number "4"; |
| oId "CUFF.98347.3"; tss_id "TSS68106";                                          |   |   |   |                                                                         |



|                                        |           |   |   |   |                                                                         |
|----------------------------------------|-----------|---|---|---|-------------------------------------------------------------------------|
| chr9 Cufflinks exon92140289            | 92141405  | . | + | . | gene_id "XLOC_054379"; transcript_id "TCONS_00089360"; exon_number "1"; |
| oId "CUFF.98347.4"; tss_id "TSS68107"; |           |   |   |   |                                                                         |
| chr9 Cufflinks exon92141807            | 92141809  | . | + | . | gene_id "XLOC_054379"; transcript_id "TCONS_00089360"; exon_number "2"; |
| oId "CUFF.98347.4"; tss_id "TSS68107"; |           |   |   |   |                                                                         |
| chr9 Cufflinks exon92142171            | 92142888  | . | + | . | gene_id "XLOC_054379"; transcript_id "TCONS_00089361"; exon_number "1"; |
| oId "CUFF.98347.5"; tss_id "TSS68108"; |           |   |   |   |                                                                         |
| chr9 Cufflinks exon92168394            | 92169784  | . | + | . | gene_id "XLOC_054379"; transcript_id "TCONS_00089361"; exon_number "2"; |
| oId "CUFF.98347.5"; tss_id "TSS68108"; |           |   |   |   |                                                                         |
| chr9 Cufflinks exon92170419            | 92172058  | . | + | . | gene_id "XLOC_054379"; transcript_id "TCONS_00089361"; exon_number "3"; |
| oId "CUFF.98347.5"; tss_id "TSS68108"; |           |   |   |   |                                                                         |
| chr9 Cufflinks exon92169072            | 92169784  | . | + | . | gene_id "XLOC_054379"; transcript_id "TCONS_00089367"; exon_number "1"; |
| oId "CUFF.98347.6"; tss_id "TSS68109"; |           |   |   |   |                                                                         |
| chr9 Cufflinks exon92170419            | 92170526  | . | + | . | gene_id "XLOC_054379"; transcript_id "TCONS_00089367"; exon_number "2"; |
| oId "CUFF.98347.6"; tss_id "TSS68109"; |           |   |   |   |                                                                         |
| chr9 Cufflinks exon92171767            | 92172058  | . | + | . | gene_id "XLOC_054379"; transcript_id "TCONS_00089367"; exon_number "3"; |
| oId "CUFF.98347.6"; tss_id "TSS68109"; |           |   |   |   |                                                                         |
| chr9 Cufflinks exon92316521            | 92316903  | . | + | . | gene_id "XLOC_054388"; transcript_id "TCONS_00089372"; exon_number "1"; |
| oId "CUFF.98367.4"; tss_id "TSS68118"; |           |   |   |   |                                                                         |
| chr9 Cufflinks exon92334102            | 92334200  | . | + | . | gene_id "XLOC_054388"; transcript_id "TCONS_00089372"; exon_number "2"; |
| oId "CUFF.98367.4"; tss_id "TSS68118"; |           |   |   |   |                                                                         |
| chr9 Cufflinks exon92334445            | 92334727  | . | + | . | gene_id "XLOC_054388"; transcript_id "TCONS_00089372"; exon_number "3"; |
| oId "CUFF.98367.4"; tss_id "TSS68118"; |           |   |   |   |                                                                         |
| chr9 Cufflinks exon92316521            | 92316904  | . | + | . | gene_id "XLOC_054388"; transcript_id "TCONS_00089371"; exon_number "1"; |
| oId "CUFF.98367.3"; tss_id "TSS68118"; |           |   |   |   |                                                                         |
| chr9 Cufflinks exon92334103            | 92334727  | . | + | . | gene_id "XLOC_054388"; transcript_id "TCONS_00089371"; exon_number "2"; |
| oId "CUFF.98367.3"; tss_id "TSS68118"; |           |   |   |   |                                                                         |
| chr9 Cufflinks exon98810863            | 98810872  | . | + | . | gene_id "XLOC_054442"; transcript_id "TCONS_00089474"; exon_number "1"; |
| oId "CUFF.98580.1"; tss_id "TSS68190"; |           |   |   |   |                                                                         |
| chr9 Cufflinks exon98908766            | 98910264  | . | + | . | gene_id "XLOC_054442"; transcript_id "TCONS_00089474"; exon_number "2"; |
| oId "CUFF.98580.1"; tss_id "TSS68190"; |           |   |   |   |                                                                         |
| chr9 Cufflinks exon100789186           | 100789476 | . | + | . | gene_id "XLOC_054459"; transcript_id "TCONS_00089504"; exon_number "1"; |
| oId "CUFF.98743.1"; tss_id "TSS68211"; |           |   |   |   |                                                                         |
| chr9 Cufflinks exon100792399           | 100792907 | . | + | . | gene_id "XLOC_054459"; transcript_id "TCONS_00089504"; exon_number "2"; |
| oId "CUFF.98743.1"; tss_id "TSS68211"; |           |   |   |   |                                                                         |
| chr9 Cufflinks exon101996465           | 101996509 | . | + | . | gene_id "XLOC_054467"; transcript_id "TCONS_00089521"; exon_number "1"; |
| oId "CUFF.98788.2"; tss_id "TSS68225"; |           |   |   |   |                                                                         |
| chr9 Cufflinks exon102000284           | 102000391 | . | + | . | gene_id "XLOC_054467"; transcript_id "TCONS_00089521"; exon_number "2"; |
| oId "CUFF.98788.2"; tss_id "TSS68225"; |           |   |   |   |                                                                         |
| chr9 Cufflinks exon102000710           | 102000771 | . | + | . | gene_id "XLOC_054467"; transcript_id "TCONS_00089521"; exon_number "3"; |
| oId "CUFF.98788.2"; tss_id "TSS68225"; |           |   |   |   |                                                                         |
| chr9 Cufflinks exon102002782           | 102003175 | . | + | . | gene_id "XLOC_054467"; transcript_id "TCONS_00089521"; exon_number "4"; |
| oId "CUFF.98788.2"; tss_id "TSS68225"; |           |   |   |   |                                                                         |
| chr9 Cufflinks exon102000286           | 102000391 | . | + | . | gene_id "XLOC_054467"; transcript_id "TCONS_00089523"; exon_number "1"; |

oId "CUFF.98788.3"; tss\_id "TSS68226";  
chr9 Cufflinks exon102002782 102003175 . + . gene\_id "XLOC\_054467"; transcript\_id "TCONS\_00089523"; exon\_number "2";  
oId "CUFF.98788.3"; tss\_id "TSS68226";  
chr9 Cufflinks exon107755578 107756331 . + . gene\_id "XLOC\_054508"; transcript\_id "TCONS\_00089590"; exon\_number "1";  
oId "CUFF.98938.2"; tss\_id "TSS68278";  
chr9 Cufflinks exon107833341 107837231 . + . gene\_id "XLOC\_054508"; transcript\_id "TCONS\_00089590"; exon\_number "2";  
oId "CUFF.98938.2"; tss\_id "TSS68278";  
chr9 Cufflinks exon130538956 130542135 . + . gene\_id "XLOC\_054711"; transcript\_id "TCONS\_00089944"; exon\_number "1";  
oId "CUFF.99601.2"; tss\_id "TSS68545";  
chr9 Cufflinks exon130543532 130546969 . + . gene\_id "XLOC\_054711"; transcript\_id "TCONS\_00089944"; exon\_number "2";  
oId "CUFF.99601.2"; tss\_id "TSS68545";  
chr9 Cufflinks exon133763800 133764456 . + . gene\_id "XLOC\_054778"; transcript\_id "TCONS\_00090074"; exon\_number "1";  
oId "CUFF.99808.1"; tss\_id "TSS68634";  
chr9 Cufflinks exon133765416 133767645 . + . gene\_id "XLOC\_054778"; transcript\_id "TCONS\_00090074"; exon\_number "2";  
oId "CUFF.99808.1"; tss\_id "TSS68634";  
chr9 Cufflinks exon133765432 133765707 . + . gene\_id "XLOC\_054778"; transcript\_id "TCONS\_00090076"; exon\_number "1";  
oId "CUFF.99808.3"; tss\_id "TSS68636";  
chr9 Cufflinks exon133767717 133770619 . + . gene\_id "XLOC\_054778"; transcript\_id "TCONS\_00090076"; exon\_number "2";  
oId "CUFF.99808.3"; tss\_id "TSS68636";  
chr9 Cufflinks exon136890472 136890658 . + . gene\_id "XLOC\_054822"; transcript\_id "TCONS\_00090179"; exon\_number "1";  
oId "CUFF.99963.1"; tss\_id "TSS68706";  
chr9 Cufflinks exon136890967 136891212 . + . gene\_id "XLOC\_054822"; transcript\_id "TCONS\_00090179"; exon\_number "2";  
oId "CUFF.99963.1"; tss\_id "TSS68706";  
chr9 Cufflinks exon 136891330 136893167 . + . gene\_id "XLOC\_054822"; transcript\_id "TCONS\_00090179";  
exon\_number "3"; oId "CUFF.99963.1"; tss\_id "TSS68706";  
chr9 Cufflinks exon 136893948 136896808 . + . gene\_id "XLOC\_054822"; transcript\_id "TCONS\_00090179";  
exon\_number "4"; oId "CUFF.99963.1"; tss\_id "TSS68706";  
chr9 Cufflinks exon 136890477 136890658 . + . gene\_id "XLOC\_054822"; transcript\_id "TCONS\_00090181";  
exon\_number "1"; oId "CUFF.99963.3"; tss\_id "TSS68706";  
chr9 Cufflinks exon 136890967 136891212 . + . gene\_id "XLOC\_054822"; transcript\_id "TCONS\_00090181";  
exon\_number "2"; oId "CUFF.99963.3"; tss\_id "TSS68706";  
chr9 Cufflinks exon 136891330 136894237 . + . gene\_id "XLOC\_054822"; transcript\_id "TCONS\_00090181";  
exon\_number "3"; oId "CUFF.99963.3"; tss\_id "TSS68706";  
chr9 Cufflinks exon 136894727 136896808 . + . gene\_id "XLOC\_054822"; transcript\_id "TCONS\_00090181";  
exon\_number "4"; oId "CUFF.99963.3"; tss\_id "TSS68706";  
chr9 Cufflinks exon 136890477 136890658 . + . gene\_id "XLOC\_054822"; transcript\_id "TCONS\_00090180";  
exon\_number "1"; oId "CUFF.99963.2"; tss\_id "TSS68706";  
chr9 Cufflinks exon 136890967 136891212 . + . gene\_id "XLOC\_054822"; transcript\_id "TCONS\_00090180";  
exon\_number "2"; oId "CUFF.99963.2"; tss\_id "TSS68706";  
chr9 Cufflinks exon 136891330 136896808 . + . gene\_id "XLOC\_054822"; transcript\_id "TCONS\_00090180";  
exon\_number "3"; oId "CUFF.99963.2"; tss\_id "TSS68706";  
chr9 Cufflinks exon 137030486 137030522 . + . gene\_id "XLOC\_054825"; transcript\_id "TCONS\_00090185";  
exon\_number "1"; oId "CUFF.99972.2"; tss\_id "TSS68710";

chr9 Cufflinks exon 137031481 137036665 . + . gene\_id "XLOC\_054825"; transcript\_id "TCONS\_00090185";  
exon\_number "2"; oId "CUFF.99972.2"; tss\_id "TSS68710";  
chr9 Cufflinks exon 137334027 137334326 . + . gene\_id "XLOC\_054828"; transcript\_id "TCONS\_00090197";  
exon\_number "1"; oId "CUFF.99975.2"; tss\_id "TSS68721";  
chr9 Cufflinks exon 137335400 137335599 . + . gene\_id "XLOC\_054828"; transcript\_id "TCONS\_00090197";  
exon\_number "2"; oId "CUFF.99975.2"; tss\_id "TSS68721";  
chr9 Cufflinks exon 137337079 137337166 . + . gene\_id "XLOC\_054828"; transcript\_id "TCONS\_00090197";  
exon\_number "3"; oId "CUFF.99975.2"; tss\_id "TSS68721";  
chr9 Cufflinks exon 137370729 137370888 . + . gene\_id "XLOC\_054828"; transcript\_id "TCONS\_00090197";  
exon\_number "4"; oId "CUFF.99975.2"; tss\_id "TSS68721";  
chr9 Cufflinks exon 137371639 137371807 . + . gene\_id "XLOC\_054828"; transcript\_id "TCONS\_00090197";  
exon\_number "5"; oId "CUFF.99975.2"; tss\_id "TSS68721";  
chr9 Cufflinks exon 137373716 137373864 . + . gene\_id "XLOC\_054828"; transcript\_id "TCONS\_00090197";  
exon\_number "6"; oId "CUFF.99975.2"; tss\_id "TSS68721";  
chr9 Cufflinks exon 137374070 137374293 . + . gene\_id "XLOC\_054828"; transcript\_id "TCONS\_00090197";  
exon\_number "7"; oId "CUFF.99975.2"; tss\_id "TSS68721";  
chr9 Cufflinks exon 137374507 137375665 . + . gene\_id "XLOC\_054828"; transcript\_id "TCONS\_00090197";  
exon\_number "8"; oId "CUFF.99975.2"; tss\_id "TSS68721";  
chr9 Cufflinks exon 137334027 137334326 . + . gene\_id "XLOC\_054828"; transcript\_id "TCONS\_00090196";  
exon\_number "1"; oId "CUFF.99975.1"; tss\_id "TSS68721";  
chr9 Cufflinks exon 137337079 137337166 . + . gene\_id "XLOC\_054828"; transcript\_id "TCONS\_00090196";  
exon\_number "2"; oId "CUFF.99975.1"; tss\_id "TSS68721";  
chr9 Cufflinks exon 137370729 137370888 . + . gene\_id "XLOC\_054828"; transcript\_id "TCONS\_00090196";  
exon\_number "3"; oId "CUFF.99975.1"; tss\_id "TSS68721";  
chr9 Cufflinks exon 137371639 137371807 . + . gene\_id "XLOC\_054828"; transcript\_id "TCONS\_00090196";  
exon\_number "4"; oId "CUFF.99975.1"; tss\_id "TSS68721";  
chr9 Cufflinks exon 137374070 137374293 . + . gene\_id "XLOC\_054828"; transcript\_id "TCONS\_00090196";  
exon\_number "5"; oId "CUFF.99975.1"; tss\_id "TSS68721";  
chr9 Cufflinks exon 137374507 137375665 . + . gene\_id "XLOC\_054828"; transcript\_id "TCONS\_00090196";  
exon\_number "6"; oId "CUFF.99975.1"; tss\_id "TSS68721";  
chr9 Cufflinks exon 137365281 137365458 . + . gene\_id "XLOC\_054828"; transcript\_id "TCONS\_00090199";  
exon\_number "1"; oId "CUFF.99975.3"; tss\_id "TSS68722";  
chr9 Cufflinks exon 137365548 137366603 . + . gene\_id "XLOC\_054828"; transcript\_id "TCONS\_00090199";  
exon\_number "2"; oId "CUFF.99975.3"; tss\_id "TSS68722";  
chr9 Cufflinks exon 137370729 137370888 . + . gene\_id "XLOC\_054828"; transcript\_id "TCONS\_00090199";  
exon\_number "3"; oId "CUFF.99975.3"; tss\_id "TSS68722";  
chr9 Cufflinks exon 137371639 137371807 . + . gene\_id "XLOC\_054828"; transcript\_id "TCONS\_00090199";  
exon\_number "4"; oId "CUFF.99975.3"; tss\_id "TSS68722";  
chr9 Cufflinks exon 137374070 137374293 . + . gene\_id "XLOC\_054828"; transcript\_id "TCONS\_00090199";  
exon\_number "5"; oId "CUFF.99975.3"; tss\_id "TSS68722";  
chr9 Cufflinks exon 137374507 137375665 . + . gene\_id "XLOC\_054828"; transcript\_id "TCONS\_00090199";  
exon\_number "6"; oId "CUFF.99975.3"; tss\_id "TSS68722";  
chr9 Cufflinks exon 139001167 139001773 . + . gene\_id "XLOC\_054840"; transcript\_id "TCONS\_00090220"; exon\_number "1";

|                                                                                   |   |   |   |                                                                         |
|-----------------------------------------------------------------------------------|---|---|---|-------------------------------------------------------------------------|
| oId "CUFF.100018.1"; tss_id "TSS68739";<br>chr9 Cufflinks exon139002044 139004400 | . | + | . | gene_id "XLOC_054840"; transcript_id "TCONS_00090220"; exon_number "2"; |
| oId "CUFF.100018.1"; tss_id "TSS68739";<br>chr9 Cufflinks exon139010914 139010943 | . | + | . | gene_id "XLOC_054841"; transcript_id "TCONS_00090223"; exon_number "1"; |
| oId "CUFF.100022.2"; tss_id "TSS68740";<br>chr9 Cufflinks exon139011666 139012152 | . | + | . | gene_id "XLOC_054841"; transcript_id "TCONS_00090223"; exon_number "2"; |
| oId "CUFF.100022.2"; tss_id "TSS68740";<br>chr9 Cufflinks exon139440608 139440823 | . | + | . | gene_id "XLOC_054855"; transcript_id "TCONS_00090239"; exon_number "1"; |
| oId "CUFF.100066.1"; tss_id "TSS68755";<br>chr9 Cufflinks exon139442294 139442553 | . | + | . | gene_id "XLOC_054855"; transcript_id "TCONS_00090239"; exon_number "2"; |
| oId "CUFF.100066.1"; tss_id "TSS68755";<br>chr9 Cufflinks exon139443196 139443314 | . | + | . | gene_id "XLOC_054855"; transcript_id "TCONS_00090239"; exon_number "3"; |
| oId "CUFF.100066.1"; tss_id "TSS68755";<br>chr9 Cufflinks exon139443584 139445649 | . | + | . | gene_id "XLOC_054855"; transcript_id "TCONS_00090239"; exon_number "4"; |
| oId "CUFF.100066.1"; tss_id "TSS68755";<br>chr9 Cufflinks exon139446223 139455373 | . | + | . | gene_id "XLOC_054855"; transcript_id "TCONS_00090239"; exon_number "5"; |
| oId "CUFF.100066.1"; tss_id "TSS68755";<br>chr9 Cufflinks exon139440633 139440823 | . | + | . | gene_id "XLOC_054855"; transcript_id "TCONS_00090240"; exon_number "1"; |
| oId "CUFF.100066.2"; tss_id "TSS68755";<br>chr9 Cufflinks exon139442294 139442553 | . | + | . | gene_id "XLOC_054855"; transcript_id "TCONS_00090240"; exon_number "2"; |
| oId "CUFF.100066.2"; tss_id "TSS68755";<br>chr9 Cufflinks exon139443584 139445472 | . | + | . | gene_id "XLOC_054855"; transcript_id "TCONS_00090240"; exon_number "3"; |
| oId "CUFF.100066.2"; tss_id "TSS68755";<br>chr9 Cufflinks exon139440646 139442009 | . | + | . | gene_id "XLOC_054855"; transcript_id "TCONS_00090242"; exon_number "1"; |
| oId "CUFF.100066.4"; tss_id "TSS68755";<br>chr9 Cufflinks exon139442294 139443314 | . | + | . | gene_id "XLOC_054855"; transcript_id "TCONS_00090242"; exon_number "2"; |
| oId "CUFF.100066.4"; tss_id "TSS68755";<br>chr9 Cufflinks exon139443584 139445649 | . | + | . | gene_id "XLOC_054855"; transcript_id "TCONS_00090242"; exon_number "3"; |
| oId "CUFF.100066.4"; tss_id "TSS68755";<br>chr9 Cufflinks exon139446223 139455373 | . | + | . | gene_id "XLOC_054855"; transcript_id "TCONS_00090242"; exon_number "4"; |
| oId "CUFF.100066.4"; tss_id "TSS68755";<br>chr9 Cufflinks exon139440646 139441498 | . | + | . | gene_id "XLOC_054855"; transcript_id "TCONS_00090241"; exon_number "1"; |
| oId "CUFF.100066.3"; tss_id "TSS68755";<br>chr9 Cufflinks exon139442291 139447522 | . | + | . | gene_id "XLOC_054855"; transcript_id "TCONS_00090241"; exon_number "2"; |
| oId "CUFF.100066.3"; tss_id "TSS68755";<br>chr9 Cufflinks exon139448057 139455373 | . | + | . | gene_id "XLOC_054855"; transcript_id "TCONS_00090241"; exon_number "3"; |
| oId "CUFF.100066.3"; tss_id "TSS68755";<br>chr9 Cufflinks exon139440670 139440823 | . | + | . | gene_id "XLOC_054855"; transcript_id "TCONS_00090243"; exon_number "1"; |
| oId "CUFF.100066.5"; tss_id "TSS68755";<br>chr9 Cufflinks exon139442294 139442553 | . | + | . | gene_id "XLOC_054855"; transcript_id "TCONS_00090243"; exon_number "2"; |
| oId "CUFF.100066.5"; tss_id "TSS68755";<br>chr9 Cufflinks exon139443196 139443260 | . | + | . | gene_id "XLOC_054855"; transcript_id "TCONS_00090243"; exon_number "3"; |
| oId "CUFF.100066.5"; tss_id "TSS68755";                                           |   |   |   |                                                                         |

|                                          |           |   |   |   |                                                                         |
|------------------------------------------|-----------|---|---|---|-------------------------------------------------------------------------|
| chr9 Cufflinks exon139443584             | 139445649 | . | + | . | gene_id "XLOC_054855"; transcript_id "TCONS_00090243"; exon_number "4"; |
| oId "CUFF.100066.5"; tss_id "TSS68755";  |           |   |   |   |                                                                         |
| chr9 Cufflinks exon139446223             | 139455373 | . | + | . | gene_id "XLOC_054855"; transcript_id "TCONS_00090243"; exon_number "5"; |
| oId "CUFF.100066.5"; tss_id "TSS68755";  |           |   |   |   |                                                                         |
| chr9 Cufflinks exon139440730             | 139440823 | . | + | . | gene_id "XLOC_054855"; transcript_id "TCONS_00090244"; exon_number "1"; |
| oId "CUFF.100066.6"; tss_id "TSS68756";  |           |   |   |   |                                                                         |
| chr9 Cufflinks exon139442294             | 139445472 | . | + | . | gene_id "XLOC_054855"; transcript_id "TCONS_00090244"; exon_number "2"; |
| oId "CUFF.100066.6"; tss_id "TSS68756";  |           |   |   |   |                                                                         |
| chr9 Cufflinks exon139440830             | 139441498 | . | + | . | gene_id "XLOC_054855"; transcript_id "TCONS_00090245"; exon_number "1"; |
| oId "CUFF.100066.7"; tss_id "TSS68756";  |           |   |   |   |                                                                         |
| chr9 Cufflinks exon139442294             | 139442553 | . | + | . | gene_id "XLOC_054855"; transcript_id "TCONS_00090245"; exon_number "2"; |
| oId "CUFF.100066.7"; tss_id "TSS68756";  |           |   |   |   |                                                                         |
| chr9 Cufflinks exon139443196             | 139443260 | . | + | . | gene_id "XLOC_054855"; transcript_id "TCONS_00090245"; exon_number "3"; |
| oId "CUFF.100066.7"; tss_id "TSS68756";  |           |   |   |   |                                                                         |
| chr9 Cufflinks exon139443584             | 139443671 | . | + | . | gene_id "XLOC_054855"; transcript_id "TCONS_00090245"; exon_number "4"; |
| oId "CUFF.100066.7"; tss_id "TSS68756";  |           |   |   |   |                                                                         |
| chr9 Cufflinks exon139445473             | 139455373 | . | + | . | gene_id "XLOC_054855"; transcript_id "TCONS_00090245"; exon_number "5"; |
| oId "CUFF.100066.7"; tss_id "TSS68756";  |           |   |   |   |                                                                         |
| chr9 Cufflinks exon139440840             | 139442009 | . | + | . | gene_id "XLOC_054855"; transcript_id "TCONS_00090246"; exon_number "1"; |
| oId "CUFF.100066.8"; tss_id "TSS68757";  |           |   |   |   |                                                                         |
| chr9 Cufflinks exon139442294             | 139442553 | . | + | . | gene_id "XLOC_054855"; transcript_id "TCONS_00090246"; exon_number "2"; |
| oId "CUFF.100066.8"; tss_id "TSS68757";  |           |   |   |   |                                                                         |
| chr9 Cufflinks exon139443584             | 139443670 | . | + | . | gene_id "XLOC_054855"; transcript_id "TCONS_00090246"; exon_number "3"; |
| oId "CUFF.100066.8"; tss_id "TSS68757";  |           |   |   |   |                                                                         |
| chr9 Cufflinks exon139447426             | 139447522 | . | + | . | gene_id "XLOC_054855"; transcript_id "TCONS_00090246"; exon_number "4"; |
| oId "CUFF.100066.8"; tss_id "TSS68757";  |           |   |   |   |                                                                         |
| chr9 Cufflinks exon139448057             | 139455373 | . | + | . | gene_id "XLOC_054855"; transcript_id "TCONS_00090246"; exon_number "5"; |
| oId "CUFF.100066.8"; tss_id "TSS68757";  |           |   |   |   |                                                                         |
| chr9 Cufflinks exon139440860             | 139442553 | . | + | . | gene_id "XLOC_054855"; transcript_id "TCONS_00090247"; exon_number "1"; |
| oId "CUFF.100066.9"; tss_id "TSS68757";  |           |   |   |   |                                                                         |
| chr9 Cufflinks exon139443584             | 139443670 | . | + | . | gene_id "XLOC_054855"; transcript_id "TCONS_00090247"; exon_number "2"; |
| oId "CUFF.100066.9"; tss_id "TSS68757";  |           |   |   |   |                                                                         |
| chr9 Cufflinks exon139443998             | 139445649 | . | + | . | gene_id "XLOC_054855"; transcript_id "TCONS_00090247"; exon_number "3"; |
| oId "CUFF.100066.9"; tss_id "TSS68757";  |           |   |   |   |                                                                         |
| chr9 Cufflinks exon139446223             | 139455373 | . | + | . | gene_id "XLOC_054855"; transcript_id "TCONS_00090247"; exon_number "4"; |
| oId "CUFF.100066.9"; tss_id "TSS68757";  |           |   |   |   |                                                                         |
| chr9 Cufflinks exon139440876             | 139442009 | . | + | . | gene_id "XLOC_054855"; transcript_id "TCONS_00090249"; exon_number "1"; |
| oId "CUFF.100066.11"; tss_id "TSS68757"; |           |   |   |   |                                                                         |
| chr9 Cufflinks exon139442294             | 139445472 | . | + | . | gene_id "XLOC_054855"; transcript_id "TCONS_00090249"; exon_number "2"; |
| oId "CUFF.100066.11"; tss_id "TSS68757"; |           |   |   |   |                                                                         |
| chr9 Cufflinks exon139440876             | 139442009 | . | + | . | gene_id "XLOC_054855"; transcript_id "TCONS_00090248"; exon_number "1"; |
| oId "CUFF.100066.10"; tss_id "TSS68757"; |           |   |   |   |                                                                         |
| chr9 Cufflinks exon139442291             | 139442553 | . | + | . | gene_id "XLOC_054855"; transcript_id "TCONS_00090248"; exon_number "2"; |

oId "CUFF.100066.10"; tss\_id "TSS68757";  
chr9 Cufflinks exon139443196 139443260 . + . gene\_id "XLOC\_054855"; transcript\_id "TCONS\_00090248"; exon\_number "3";  
oId "CUFF.100066.10"; tss\_id "TSS68757";  
chr9 Cufflinks exon139443584 139445472 . + . gene\_id "XLOC\_054855"; transcript\_id "TCONS\_00090248"; exon\_number "4";  
oId "CUFF.100066.10"; tss\_id "TSS68757";  
chr9 Cufflinks exon139441503 139442009 . + . gene\_id "XLOC\_054855"; transcript\_id "TCONS\_00090250"; exon\_number "1";  
oId "CUFF.100066.12"; tss\_id "TSS68758";  
chr9 Cufflinks exon139442294 139442553 . + . gene\_id "XLOC\_054855"; transcript\_id "TCONS\_00090250"; exon\_number "2";  
oId "CUFF.100066.12"; tss\_id "TSS68758";  
chr9 Cufflinks exon139443196 139443262 . + . gene\_id "XLOC\_054855"; transcript\_id "TCONS\_00090250"; exon\_number "3";  
oId "CUFF.100066.12"; tss\_id "TSS68758";  
chr9 Cufflinks exon139443586 139443670 . + . gene\_id "XLOC\_054855"; transcript\_id "TCONS\_00090250"; exon\_number "4";  
oId "CUFF.100066.12"; tss\_id "TSS68758";  
chr9 Cufflinks exon139443998 139445472 . + . gene\_id "XLOC\_054855"; transcript\_id "TCONS\_00090250"; exon\_number "5";  
oId "CUFF.100066.12"; tss\_id "TSS68758";  
chr9 Cufflinks exon139442024 139444839 . + . gene\_id "XLOC\_054855"; transcript\_id "TCONS\_00090251"; exon\_number "1";  
oId "CUFF.100066.13"; tss\_id "TSS68759";  
chr9 Cufflinks exon139445473 139455373 . + . gene\_id "XLOC\_054855"; transcript\_id "TCONS\_00090251"; exon\_number "2";  
oId "CUFF.100066.13"; tss\_id "TSS68759";  
chr9 Cufflinks exon139442035 139443273 . + . gene\_id "XLOC\_054855"; transcript\_id "TCONS\_00090252"; exon\_number "1";  
oId "CUFF.100066.14"; tss\_id "TSS68759";  
chr9 Cufflinks exon139443584 139443670 . + . gene\_id "XLOC\_054855"; transcript\_id "TCONS\_00090252"; exon\_number "2";  
oId "CUFF.100066.14"; tss\_id "TSS68759";  
chr9 Cufflinks exon139443998 139445472 . + . gene\_id "XLOC\_054855"; transcript\_id "TCONS\_00090252"; exon\_number "3";  
oId "CUFF.100066.14"; tss\_id "TSS68759";  
chr9 Cufflinks exon139495100 139496824 . + . gene\_id "XLOC\_054857"; transcript\_id "TCONS\_00090255"; exon\_number "1";  
oId "CUFF.100075.7"; tss\_id "TSS68761";  
chr9 Cufflinks exon139505895 139508200 . + . gene\_id "XLOC\_054857"; transcript\_id "TCONS\_00090255"; exon\_number "2";  
oId "CUFF.100075.7"; tss\_id "TSS68761";  
chr9 Cufflinks exon139495100 139496824 . + . gene\_id "XLOC\_054857"; transcript\_id "TCONS\_00090254"; exon\_number "1";  
oId "CUFF.100075.6"; tss\_id "TSS68761";  
chr9 Cufflinks exon139505899 139508200 . + . gene\_id "XLOC\_054857"; transcript\_id "TCONS\_00090254"; exon\_number "2";  
oId "CUFF.100075.6"; tss\_id "TSS68761";  
chr9 Cufflinks exon696880 700758 . - . gene\_id "XLOC\_054933"; transcript\_id "TCONS\_00090376"; exon\_number "1"; oId  
"CUFF.95927.5"; tss\_id "TSS68850";  
chr9 Cufflinks exon702294 702493 . - . gene\_id "XLOC\_054933"; transcript\_id "TCONS\_00090376"; exon\_number "2"; oId  
"CUFF.95927.5"; tss\_id "TSS68850";  
chr9 Cufflinks exon710658 711640 . - . gene\_id "XLOC\_054933"; transcript\_id "TCONS\_00090376"; exon\_number "3"; oId  
"CUFF.95927.5"; tss\_id "TSS68850";  
chr9 Cufflinks exon711879 713023 . - . gene\_id "XLOC\_054933"; transcript\_id "TCONS\_00090376"; exon\_number "4"; oId  
"CUFF.95927.5"; tss\_id "TSS68850";  
chr9 Cufflinks exon714809 714928 . - . gene\_id "XLOC\_054933"; transcript\_id "TCONS\_00090376"; exon\_number "5"; oId  
"CUFF.95927.5"; tss\_id "TSS68850";

chr9 Cufflinks exon747407 747469 . - . gene\_id "XLOC\_054933"; transcript\_id "TCONS\_00090376"; exon\_number "6"; oId  
"CUFF.95927.5"; tss\_id "TSS68850";  
chr9 Cufflinks exon749336 749791 . - . gene\_id "XLOC\_054933"; transcript\_id "TCONS\_00090376"; exon\_number "7"; oId  
"CUFF.95927.5"; tss\_id "TSS68850";  
chr9 Cufflinks exon696880 700156 . - . gene\_id "XLOC\_054933"; transcript\_id "TCONS\_00090375"; exon\_number "1"; oId  
"CUFF.95927.3"; tss\_id "TSS68850";  
chr9 Cufflinks exon702294 702493 . - . gene\_id "XLOC\_054933"; transcript\_id "TCONS\_00090375"; exon\_number "2"; oId  
"CUFF.95927.3"; tss\_id "TSS68850";  
chr9 Cufflinks exon710658 710725 . - . gene\_id "XLOC\_054933"; transcript\_id "TCONS\_00090375"; exon\_number "3"; oId  
"CUFF.95927.3"; tss\_id "TSS68850";  
chr9 Cufflinks exon711879 713023 . - . gene\_id "XLOC\_054933"; transcript\_id "TCONS\_00090375"; exon\_number "4"; oId  
"CUFF.95927.3"; tss\_id "TSS68850";  
chr9 Cufflinks exon714809 714927 . - . gene\_id "XLOC\_054933"; transcript\_id "TCONS\_00090375"; exon\_number "5"; oId  
"CUFF.95927.3"; tss\_id "TSS68850";  
chr9 Cufflinks exon747408 747469 . - . gene\_id "XLOC\_054933"; transcript\_id "TCONS\_00090375"; exon\_number "6"; oId  
"CUFF.95927.3"; tss\_id "TSS68850";  
chr9 Cufflinks exon749336 749791 . - . gene\_id "XLOC\_054933"; transcript\_id "TCONS\_00090375"; exon\_number "7"; oId  
"CUFF.95927.3"; tss\_id "TSS68850";  
chr9 Cufflinks exon696880 700758 . - . gene\_id "XLOC\_054933"; transcript\_id "TCONS\_00090377"; exon\_number "1"; oId  
"CUFF.95927.1"; tss\_id "TSS68850";  
chr9 Cufflinks exon702294 702493 . - . gene\_id "XLOC\_054933"; transcript\_id "TCONS\_00090377"; exon\_number "2"; oId  
"CUFF.95927.1"; tss\_id "TSS68850";  
chr9 Cufflinks exon710658 710730 . - . gene\_id "XLOC\_054933"; transcript\_id "TCONS\_00090377"; exon\_number "3"; oId  
"CUFF.95927.1"; tss\_id "TSS68850";  
chr9 Cufflinks exon711549 711640 . - . gene\_id "XLOC\_054933"; transcript\_id "TCONS\_00090377"; exon\_number "4"; oId  
"CUFF.95927.1"; tss\_id "TSS68850";  
chr9 Cufflinks exon711879 713023 . - . gene\_id "XLOC\_054933"; transcript\_id "TCONS\_00090377"; exon\_number "5"; oId  
"CUFF.95927.1"; tss\_id "TSS68850";  
chr9 Cufflinks exon714809 714926 . - . gene\_id "XLOC\_054933"; transcript\_id "TCONS\_00090377"; exon\_number "6"; oId  
"CUFF.95927.1"; tss\_id "TSS68850";  
chr9 Cufflinks exon747407 747469 . - . gene\_id "XLOC\_054933"; transcript\_id "TCONS\_00090377"; exon\_number "7"; oId  
"CUFF.95927.1"; tss\_id "TSS68850";  
chr9 Cufflinks exon749336 749803 . - . gene\_id "XLOC\_054933"; transcript\_id "TCONS\_00090377"; exon\_number "8"; oId  
"CUFF.95927.1"; tss\_id "TSS68850";  
chr9 Cufflinks exon696880 700758 . - . gene\_id "XLOC\_054933"; transcript\_id "TCONS\_00090378"; exon\_number "1"; oId  
"CUFF.95927.2"; tss\_id "TSS68850";  
chr9 Cufflinks exon702294 702493 . - . gene\_id "XLOC\_054933"; transcript\_id "TCONS\_00090378"; exon\_number "2"; oId  
"CUFF.95927.2"; tss\_id "TSS68850";  
chr9 Cufflinks exon710658 710725 . - . gene\_id "XLOC\_054933"; transcript\_id "TCONS\_00090378"; exon\_number "3"; oId  
"CUFF.95927.2"; tss\_id "TSS68850";  
chr9 Cufflinks exon711544 713023 . - . gene\_id "XLOC\_054933"; transcript\_id "TCONS\_00090378"; exon\_number "4"; oId  
"CUFF.95927.2"; tss\_id "TSS68850";  
chr9 Cufflinks exon714809 714926 . - . gene\_id "XLOC\_054933"; transcript\_id "TCONS\_00090378"; exon\_number "5"; oId

"CUFF.95927.2"; tss\_id "TSS68850";  
chr9 Cufflinks exon747407 747469 . - . gene\_id "XLOC\_054933"; transcript\_id "TCONS\_00090378"; exon\_number "6"; oId  
"CUFF.95927.2"; tss\_id "TSS68850";  
chr9 Cufflinks exon749336 749805 . - . gene\_id "XLOC\_054933"; transcript\_id "TCONS\_00090378"; exon\_number "7"; oId  
"CUFF.95927.2"; tss\_id "TSS68850";  
chr9 Cufflinks exon2716330 2720532 . - . gene\_id "XLOC\_054964"; transcript\_id "TCONS\_00090410"; exon\_number "1"; oId  
"CUFF.96021.1"; tss\_id "TSS68882";  
chr9 Cufflinks exon2777873 2777994 . - . gene\_id "XLOC\_054964"; transcript\_id "TCONS\_00090410"; exon\_number "2"; oId  
"CUFF.96021.1"; tss\_id "TSS68882";  
chr9 Cufflinks exon2782756 2802522 . - . gene\_id "XLOC\_054964"; transcript\_id "TCONS\_00090410"; exon\_number "3"; oId  
"CUFF.96021.1"; tss\_id "TSS68882";  
chr9 Cufflinks exon4679027 4679165 . - . gene\_id "XLOC\_054983"; transcript\_id "TCONS\_00090436"; exon\_number "1"; oId  
"CUFF.96113.7"; tss\_id "TSS68907";  
chr9 Cufflinks exon4679387 4679472 . - . gene\_id "XLOC\_054983"; transcript\_id "TCONS\_00090436"; exon\_number "2"; oId  
"CUFF.96113.7"; tss\_id "TSS68907";  
chr9 Cufflinks exon6408592 6408756 . - . gene\_id "XLOC\_055022"; transcript\_id "TCONS\_00090487"; exon\_number "1"; oId  
"CUFF.96214.1"; tss\_id "TSS68951";  
chr9 Cufflinks exon6411774 6412971 . - . gene\_id "XLOC\_055022"; transcript\_id "TCONS\_00090487"; exon\_number "2"; oId  
"CUFF.96214.1"; tss\_id "TSS68951";  
chr9 Cufflinks exon10948369 10948481 . - . gene\_id "XLOC\_055036"; transcript\_id "TCONS\_00090519"; exon\_number "1";  
oId "CUFF.96292.1"; tss\_id "TSS68969";  
chr9 Cufflinks exon11064969 11065072 . - . gene\_id "XLOC\_055036"; transcript\_id "TCONS\_00090519"; exon\_number "2";  
oId "CUFF.96292.1"; tss\_id "TSS68969";  
chr9 Cufflinks exon13738524 13739619 . - . gene\_id "XLOC\_055043"; transcript\_id "TCONS\_00090526"; exon\_number "1";  
oId "CUFF.96312.1"; tss\_id "TSS68976";  
chr9 Cufflinks exon13743981 13744782 . - . gene\_id "XLOC\_055043"; transcript\_id "TCONS\_00090526"; exon\_number "2";  
oId "CUFF.96312.1"; tss\_id "TSS68976";  
chr9 Cufflinks exon13754233 13754958 . - . gene\_id "XLOC\_055043"; transcript\_id "TCONS\_00090526"; exon\_number "3";  
oId "CUFF.96312.1"; tss\_id "TSS68976";  
chr9 Cufflinks exon13738524 13739619 . - . gene\_id "XLOC\_055043"; transcript\_id "TCONS\_00090527"; exon\_number "1";  
oId "CUFF.96312.3"; tss\_id "TSS68977";  
chr9 Cufflinks exon13743981 13744782 . - . gene\_id "XLOC\_055043"; transcript\_id "TCONS\_00090527"; exon\_number "2";  
oId "CUFF.96312.3"; tss\_id "TSS68977";  
chr9 Cufflinks exon13881898 13881989 . - . gene\_id "XLOC\_055043"; transcript\_id "TCONS\_00090527"; exon\_number "3";  
oId "CUFF.96312.3"; tss\_id "TSS68977";  
chr9 Cufflinks exon13939660 13939902 . - . gene\_id "XLOC\_055043"; transcript\_id "TCONS\_00090527"; exon\_number "4";  
oId "CUFF.96312.3"; tss\_id "TSS68977";  
chr9 Cufflinks exon14920633 14922401 . - . gene\_id "XLOC\_055056"; transcript\_id "TCONS\_00090551"; exon\_number "1";  
oId "CUFF.96335.4"; tss\_id "TSS68996";  
chr9 Cufflinks exon14928837 14929033 . - . gene\_id "XLOC\_055056"; transcript\_id "TCONS\_00090551"; exon\_number "2";  
oId "CUFF.96335.4"; tss\_id "TSS68996";  
chr9 Cufflinks exon14931624 14931721 . - . gene\_id "XLOC\_055056"; transcript\_id "TCONS\_00090551"; exon\_number "3";  
oId "CUFF.96335.4"; tss\_id "TSS68996";



|                                        |          |   |   |   |                                                                         |
|----------------------------------------|----------|---|---|---|-------------------------------------------------------------------------|
| chr9 Cufflinks exon14987891            | 14987954 | . | - | . | gene_id "XLOC_055056"; transcript_id "TCONS_00090551"; exon_number "4"; |
| oId "CUFF.96335.4"; tss_id "TSS68996"; |          |   |   |   |                                                                         |
| chr9 Cufflinks exon14989298            | 14989339 | . | - | . | gene_id "XLOC_055056"; transcript_id "TCONS_00090551"; exon_number "5"; |
| oId "CUFF.96335.4"; tss_id "TSS68996"; |          |   |   |   |                                                                         |
| chr9 Cufflinks exon14990226            | 14990343 | . | - | . | gene_id "XLOC_055056"; transcript_id "TCONS_00090551"; exon_number "6"; |
| oId "CUFF.96335.4"; tss_id "TSS68996"; |          |   |   |   |                                                                         |
| chr9 Cufflinks exon14992527            | 14992757 | . | - | . | gene_id "XLOC_055056"; transcript_id "TCONS_00090551"; exon_number "7"; |
| oId "CUFF.96335.4"; tss_id "TSS68996"; |          |   |   |   |                                                                         |
| chr9 Cufflinks exon14993152            | 14993167 | . | - | . | gene_id "XLOC_055056"; transcript_id "TCONS_00090551"; exon_number "8"; |
| oId "CUFF.96335.4"; tss_id "TSS68996"; |          |   |   |   |                                                                         |
| chr9 Cufflinks exon14920633            | 14922401 | . | - | . | gene_id "XLOC_055056"; transcript_id "TCONS_00090552"; exon_number "1"; |
| oId "CUFF.96335.2"; tss_id "TSS68996"; |          |   |   |   |                                                                         |
| chr9 Cufflinks exon14927411            | 14929027 | . | - | . | gene_id "XLOC_055056"; transcript_id "TCONS_00090552"; exon_number "2"; |
| oId "CUFF.96335.2"; tss_id "TSS68996"; |          |   |   |   |                                                                         |
| chr9 Cufflinks exon14987891            | 14987954 | . | - | . | gene_id "XLOC_055056"; transcript_id "TCONS_00090552"; exon_number "3"; |
| oId "CUFF.96335.2"; tss_id "TSS68996"; |          |   |   |   |                                                                         |
| chr9 Cufflinks exon14989295            | 14989338 | . | - | . | gene_id "XLOC_055056"; transcript_id "TCONS_00090552"; exon_number "4"; |
| oId "CUFF.96335.2"; tss_id "TSS68996"; |          |   |   |   |                                                                         |
| chr9 Cufflinks exon14990226            | 14990343 | . | - | . | gene_id "XLOC_055056"; transcript_id "TCONS_00090552"; exon_number "5"; |
| oId "CUFF.96335.2"; tss_id "TSS68996"; |          |   |   |   |                                                                         |
| chr9 Cufflinks exon14993147            | 14993179 | . | - | . | gene_id "XLOC_055056"; transcript_id "TCONS_00090552"; exon_number "6"; |
| oId "CUFF.96335.2"; tss_id "TSS68996"; |          |   |   |   |                                                                         |
| chr9 Cufflinks exon14920633            | 14929027 | . | - | . | gene_id "XLOC_055056"; transcript_id "TCONS_00090553"; exon_number "1"; |
| oId "CUFF.96335.1"; tss_id "TSS68996"; |          |   |   |   |                                                                         |
| chr9 Cufflinks exon14931624            | 14931721 | . | - | . | gene_id "XLOC_055056"; transcript_id "TCONS_00090553"; exon_number "2"; |
| oId "CUFF.96335.1"; tss_id "TSS68996"; |          |   |   |   |                                                                         |
| chr9 Cufflinks exon14987891            | 14987954 | . | - | . | gene_id "XLOC_055056"; transcript_id "TCONS_00090553"; exon_number "3"; |
| oId "CUFF.96335.1"; tss_id "TSS68996"; |          |   |   |   |                                                                         |
| chr9 Cufflinks exon14989298            | 14989338 | . | - | . | gene_id "XLOC_055056"; transcript_id "TCONS_00090553"; exon_number "4"; |
| oId "CUFF.96335.1"; tss_id "TSS68996"; |          |   |   |   |                                                                         |
| chr9 Cufflinks exon14990226            | 14990343 | . | - | . | gene_id "XLOC_055056"; transcript_id "TCONS_00090553"; exon_number "5"; |
| oId "CUFF.96335.1"; tss_id "TSS68996"; |          |   |   |   |                                                                         |
| chr9 Cufflinks exon14992527            | 14993216 | . | - | . | gene_id "XLOC_055056"; transcript_id "TCONS_00090553"; exon_number "6"; |
| oId "CUFF.96335.1"; tss_id "TSS68996"; |          |   |   |   |                                                                         |
| chr9 Cufflinks exon14920633            | 14922401 | . | - | . | gene_id "XLOC_055056"; transcript_id "TCONS_00090555"; exon_number "1"; |
| oId "CUFF.96335.5"; tss_id "TSS68996"; |          |   |   |   |                                                                         |
| chr9 Cufflinks exon14987891            | 14987955 | . | - | . | gene_id "XLOC_055056"; transcript_id "TCONS_00090555"; exon_number "2"; |
| oId "CUFF.96335.5"; tss_id "TSS68996"; |          |   |   |   |                                                                         |
| chr9 Cufflinks exon14989299            | 14989343 | . | - | . | gene_id "XLOC_055056"; transcript_id "TCONS_00090555"; exon_number "3"; |
| oId "CUFF.96335.5"; tss_id "TSS68996"; |          |   |   |   |                                                                         |
| chr9 Cufflinks exon14990231            | 14990343 | . | - | . | gene_id "XLOC_055056"; transcript_id "TCONS_00090555"; exon_number "4"; |
| oId "CUFF.96335.5"; tss_id "TSS68996"; |          |   |   |   |                                                                         |
| chr9 Cufflinks exon14992527            | 14993306 | . | - | . | gene_id "XLOC_055056"; transcript_id "TCONS_00090555"; exon_number "5"; |

|                                        |          |   |   |   |                                                                         |
|----------------------------------------|----------|---|---|---|-------------------------------------------------------------------------|
| oId "CUFF.96335.5"; tss_id "TSS68996"; |          |   |   |   |                                                                         |
| chr9 Cufflinks exon14920633            | 14929027 | . | - | . | gene_id "XLOC_055056"; transcript_id "TCONS_00090554"; exon_number "1"; |
| oId "CUFF.96335.3"; tss_id "TSS68996"; |          |   |   |   |                                                                         |
| chr9 Cufflinks exon14931624            | 14931721 | . | - | . | gene_id "XLOC_055056"; transcript_id "TCONS_00090554"; exon_number "2"; |
| oId "CUFF.96335.3"; tss_id "TSS68996"; |          |   |   |   |                                                                         |
| chr9 Cufflinks exon14987891            | 14987956 | . | - | . | gene_id "XLOC_055056"; transcript_id "TCONS_00090554"; exon_number "3"; |
| oId "CUFF.96335.3"; tss_id "TSS68996"; |          |   |   |   |                                                                         |
| chr9 Cufflinks exon14989300            | 14989347 | . | - | . | gene_id "XLOC_055056"; transcript_id "TCONS_00090554"; exon_number "4"; |
| oId "CUFF.96335.3"; tss_id "TSS68996"; |          |   |   |   |                                                                         |
| chr9 Cufflinks exon14990235            | 14990343 | . | - | . | gene_id "XLOC_055056"; transcript_id "TCONS_00090554"; exon_number "5"; |
| oId "CUFF.96335.3"; tss_id "TSS68996"; |          |   |   |   |                                                                         |
| chr9 Cufflinks exon14992527            | 14992752 | . | - | . | gene_id "XLOC_055056"; transcript_id "TCONS_00090554"; exon_number "6"; |
| oId "CUFF.96335.3"; tss_id "TSS68996"; |          |   |   |   |                                                                         |
| chr9 Cufflinks exon14992996            | 14993306 | . | - | . | gene_id "XLOC_055056"; transcript_id "TCONS_00090554"; exon_number "7"; |
| oId "CUFF.96335.3"; tss_id "TSS68996"; |          |   |   |   |                                                                         |
| chr9 Cufflinks exon32282180            | 32282503 | . | - | . | gene_id "XLOC_055140"; transcript_id "TCONS_00090680"; exon_number "1"; |
| oId "CUFF.96701.1"; tss_id "TSS69100"; |          |   |   |   |                                                                         |
| chr9 Cufflinks exon32319277            | 32319304 | . | - | . | gene_id "XLOC_055140"; transcript_id "TCONS_00090680"; exon_number "2"; |
| oId "CUFF.96701.1"; tss_id "TSS69100"; |          |   |   |   |                                                                         |
| chr9 Cufflinks exon32317959            | 32319570 | . | - | . | gene_id "XLOC_055140"; transcript_id "TCONS_00090683"; exon_number "1"; |
| oId "CUFF.96701.4"; tss_id "TSS69102"; |          |   |   |   |                                                                         |
| chr9 Cufflinks exon32319668            | 32319829 | . | - | . | gene_id "XLOC_055140"; transcript_id "TCONS_00090683"; exon_number "2"; |
| oId "CUFF.96701.4"; tss_id "TSS69102"; |          |   |   |   |                                                                         |
| chr9 Cufflinks exon32320721            | 32322626 | . | - | . | gene_id "XLOC_055140"; transcript_id "TCONS_00090683"; exon_number "3"; |
| oId "CUFF.96701.4"; tss_id "TSS69102"; |          |   |   |   |                                                                         |
| chr9 Cufflinks exon32317959            | 32319570 | . | - | . | gene_id "XLOC_055140"; transcript_id "TCONS_00090684"; exon_number "1"; |
| oId "CUFF.96701.5"; tss_id "TSS69103"; |          |   |   |   |                                                                         |
| chr9 Cufflinks exon32351830            | 32351937 | . | - | . | gene_id "XLOC_055140"; transcript_id "TCONS_00090684"; exon_number "2"; |
| oId "CUFF.96701.5"; tss_id "TSS69103"; |          |   |   |   |                                                                         |
| chr9 Cufflinks exon32317959            | 32319570 | . | - | . | gene_id "XLOC_055140"; transcript_id "TCONS_00090685"; exon_number "1"; |
| oId "CUFF.96701.2"; tss_id "TSS69103"; |          |   |   |   |                                                                         |
| chr9 Cufflinks exon32324473            | 32328202 | . | - | . | gene_id "XLOC_055140"; transcript_id "TCONS_00090685"; exon_number "2"; |
| oId "CUFF.96701.2"; tss_id "TSS69103"; |          |   |   |   |                                                                         |
| chr9 Cufflinks exon32351830            | 32351959 | . | - | . | gene_id "XLOC_055140"; transcript_id "TCONS_00090685"; exon_number "3"; |
| oId "CUFF.96701.2"; tss_id "TSS69103"; |          |   |   |   |                                                                         |
| chr9 Cufflinks exon32881088            | 32883338 | . | - | . | gene_id "XLOC_055159"; transcript_id "TCONS_00090706"; exon_number "1"; |
| oId "CUFF.96749.1"; tss_id "TSS69124"; |          |   |   |   |                                                                         |
| chr9 Cufflinks exon32883728            | 32887244 | . | - | . | gene_id "XLOC_055159"; transcript_id "TCONS_00090706"; exon_number "2"; |
| oId "CUFF.96749.1"; tss_id "TSS69124"; |          |   |   |   |                                                                         |
| chr9 Cufflinks exon32924895            | 32925026 | . | - | . | gene_id "XLOC_055159"; transcript_id "TCONS_00090706"; exon_number "3"; |
| oId "CUFF.96749.1"; tss_id "TSS69124"; |          |   |   |   |                                                                         |
| chr9 Cufflinks exon32926380            | 32926413 | . | - | . | gene_id "XLOC_055159"; transcript_id "TCONS_00090706"; exon_number "4"; |
| oId "CUFF.96749.1"; tss_id "TSS69124"; |          |   |   |   |                                                                         |

|                                        |          |   |   |   |                                                                         |
|----------------------------------------|----------|---|---|---|-------------------------------------------------------------------------|
| chr9 Cufflinks exon32885416            | 32886292 | . | - | . | gene_id "XLOC_055159"; transcript_id "TCONS_00090707"; exon_number "1"; |
| oId "CUFF.96749.2"; tss_id "TSS69124"; |          |   |   |   |                                                                         |
| chr9 Cufflinks exon32886599            | 32887245 | . | - | . | gene_id "XLOC_055159"; transcript_id "TCONS_00090707"; exon_number "2"; |
| oId "CUFF.96749.2"; tss_id "TSS69124"; |          |   |   |   |                                                                         |
| chr9 Cufflinks exon32891849            | 32891912 | . | - | . | gene_id "XLOC_055159"; transcript_id "TCONS_00090707"; exon_number "3"; |
| oId "CUFF.96749.2"; tss_id "TSS69124"; |          |   |   |   |                                                                         |
| chr9 Cufflinks exon32924895            | 32925026 | . | - | . | gene_id "XLOC_055159"; transcript_id "TCONS_00090707"; exon_number "4"; |
| oId "CUFF.96749.2"; tss_id "TSS69124"; |          |   |   |   |                                                                         |
| chr9 Cufflinks exon32926380            | 32926407 | . | - | . | gene_id "XLOC_055159"; transcript_id "TCONS_00090707"; exon_number "5"; |
| oId "CUFF.96749.2"; tss_id "TSS69124"; |          |   |   |   |                                                                         |
| chr9 Cufflinks exon33019429            | 33020881 | . | - | . | gene_id "XLOC_055168"; transcript_id "TCONS_00090722"; exon_number "1"; |
| oId "CUFF.96772.1"; tss_id "TSS69135"; |          |   |   |   |                                                                         |
| chr9 Cufflinks exon33023520            | 33024092 | . | - | . | gene_id "XLOC_055168"; transcript_id "TCONS_00090722"; exon_number "2"; |
| oId "CUFF.96772.1"; tss_id "TSS69135"; |          |   |   |   |                                                                         |
| chr9 Cufflinks exon33610408            | 33614006 | . | - | . | gene_id "XLOC_055190"; transcript_id "TCONS_00090758"; exon_number "1"; |
| oId "CUFF.96825.2"; tss_id "TSS69158"; |          |   |   |   |                                                                         |
| chr9 Cufflinks exon33729688            | 33729842 | . | - | . | gene_id "XLOC_055190"; transcript_id "TCONS_00090758"; exon_number "2"; |
| oId "CUFF.96825.2"; tss_id "TSS69158"; |          |   |   |   |                                                                         |
| chr9 Cufflinks exon33738286            | 33738414 | . | - | . | gene_id "XLOC_055190"; transcript_id "TCONS_00090758"; exon_number "3"; |
| oId "CUFF.96825.2"; tss_id "TSS69158"; |          |   |   |   |                                                                         |
| chr9 Cufflinks exon33748765            | 33749439 | . | - | . | gene_id "XLOC_055190"; transcript_id "TCONS_00090758"; exon_number "4"; |
| oId "CUFF.96825.2"; tss_id "TSS69158"; |          |   |   |   |                                                                         |
| chr9 Cufflinks exon33610408            | 33614006 | . | - | . | gene_id "XLOC_055190"; transcript_id "TCONS_00090757"; exon_number "1"; |
| oId "CUFF.96825.1"; tss_id "TSS69158"; |          |   |   |   |                                                                         |
| chr9 Cufflinks exon33738286            | 33738414 | . | - | . | gene_id "XLOC_055190"; transcript_id "TCONS_00090757"; exon_number "2"; |
| oId "CUFF.96825.1"; tss_id "TSS69158"; |          |   |   |   |                                                                         |
| chr9 Cufflinks exon33748765            | 33749439 | . | - | . | gene_id "XLOC_055190"; transcript_id "TCONS_00090757"; exon_number "3"; |
| oId "CUFF.96825.1"; tss_id "TSS69158"; |          |   |   |   |                                                                         |
| chr9 Cufflinks exon33718393            | 33722409 | . | - | . | gene_id "XLOC_055190"; transcript_id "TCONS_00090762"; exon_number "1"; |
| oId "CUFF.96825.3"; tss_id "TSS69159"; |          |   |   |   |                                                                         |
| chr9 Cufflinks exon33729688            | 33729842 | . | - | . | gene_id "XLOC_055190"; transcript_id "TCONS_00090762"; exon_number "2"; |
| oId "CUFF.96825.3"; tss_id "TSS69159"; |          |   |   |   |                                                                         |
| chr9 Cufflinks exon33738286            | 33738414 | . | - | . | gene_id "XLOC_055190"; transcript_id "TCONS_00090762"; exon_number "3"; |
| oId "CUFF.96825.3"; tss_id "TSS69159"; |          |   |   |   |                                                                         |
| chr9 Cufflinks exon33798366            | 33798555 | . | - | . | gene_id "XLOC_055190"; transcript_id "TCONS_00090762"; exon_number "4"; |
| oId "CUFF.96825.3"; tss_id "TSS69159"; |          |   |   |   |                                                                         |
| chr9 Cufflinks exon33799785            | 33799911 | . | - | . | gene_id "XLOC_055190"; transcript_id "TCONS_00090762"; exon_number "5"; |
| oId "CUFF.96825.3"; tss_id "TSS69159"; |          |   |   |   |                                                                         |
| chr9 Cufflinks exon33800558            | 33805099 | . | - | . | gene_id "XLOC_055190"; transcript_id "TCONS_00090762"; exon_number "6"; |
| oId "CUFF.96825.3"; tss_id "TSS69159"; |          |   |   |   |                                                                         |
| chr9 Cufflinks exon33730810            | 33732279 | . | - | . | gene_id "XLOC_055190"; transcript_id "TCONS_00090763"; exon_number "1"; |
| oId "CUFF.96825.5"; tss_id "TSS69158"; |          |   |   |   |                                                                         |
| chr9 Cufflinks exon33748765            | 33749443 | . | - | . | gene_id "XLOC_055190"; transcript_id "TCONS_00090763"; exon_number "2"; |

|                                         |   |   |   |                                                                         |  |
|-----------------------------------------|---|---|---|-------------------------------------------------------------------------|--|
| oId "CUFF.96825.5"; tss_id "TSS69158";  |   |   |   |                                                                         |  |
| chr9 Cufflinks exon33732971 33734117    | . | - | . | gene_id "XLOC_055190"; transcript_id "TCONS_00090764"; exon_number "1"; |  |
| oId "CUFF.96825.9"; tss_id "TSS69158";  |   |   |   |                                                                         |  |
| chr9 Cufflinks exon33738286 33738414    | . | - | . | gene_id "XLOC_055190"; transcript_id "TCONS_00090764"; exon_number "2"; |  |
| oId "CUFF.96825.9"; tss_id "TSS69158";  |   |   |   |                                                                         |  |
| chr9 Cufflinks exon33748117 33748245    | . | - | . | gene_id "XLOC_055190"; transcript_id "TCONS_00090764"; exon_number "3"; |  |
| oId "CUFF.96825.9"; tss_id "TSS69158";  |   |   |   |                                                                         |  |
| chr9 Cufflinks exon33748765 33749439    | . | - | . | gene_id "XLOC_055190"; transcript_id "TCONS_00090764"; exon_number "4"; |  |
| oId "CUFF.96825.9"; tss_id "TSS69158";  |   |   |   |                                                                         |  |
| chr9 Cufflinks exon33732971 33734117    | . | - | . | gene_id "XLOC_055190"; transcript_id "TCONS_00090765"; exon_number "1"; |  |
| oId "CUFF.96825.6"; tss_id "TSS69158";  |   |   |   |                                                                         |  |
| chr9 Cufflinks exon33738286 33738414    | . | - | . | gene_id "XLOC_055190"; transcript_id "TCONS_00090765"; exon_number "2"; |  |
| oId "CUFF.96825.6"; tss_id "TSS69158";  |   |   |   |                                                                         |  |
| chr9 Cufflinks exon33748765 33749443    | . | - | . | gene_id "XLOC_055190"; transcript_id "TCONS_00090765"; exon_number "3"; |  |
| oId "CUFF.96825.6"; tss_id "TSS69158";  |   |   |   |                                                                         |  |
| chr9 Cufflinks exon33778551 33778749    | . | - | . | gene_id "XLOC_055190"; transcript_id "TCONS_00090767"; exon_number "1"; |  |
| oId "CUFF.96825.13"; tss_id "TSS69160"; |   |   |   |                                                                         |  |
| chr9 Cufflinks exon33781874 33782091    | . | - | . | gene_id "XLOC_055190"; transcript_id "TCONS_00090767"; exon_number "2"; |  |
| oId "CUFF.96825.13"; tss_id "TSS69160"; |   |   |   |                                                                         |  |
| chr9 Cufflinks exon33798366 33798555    | . | - | . | gene_id "XLOC_055190"; transcript_id "TCONS_00090767"; exon_number "3"; |  |
| oId "CUFF.96825.13"; tss_id "TSS69160"; |   |   |   |                                                                         |  |
| chr9 Cufflinks exon33799785 33801002    | . | - | . | gene_id "XLOC_055190"; transcript_id "TCONS_00090767"; exon_number "4"; |  |
| oId "CUFF.96825.13"; tss_id "TSS69160"; |   |   |   |                                                                         |  |
| chr9 Cufflinks exon33817943 33818112    | . | - | . | gene_id "XLOC_055190"; transcript_id "TCONS_00090767"; exon_number "5"; |  |
| oId "CUFF.96825.13"; tss_id "TSS69160"; |   |   |   |                                                                         |  |
| chr9 Cufflinks exon33778551 33778749    | . | - | . | gene_id "XLOC_055190"; transcript_id "TCONS_00090766"; exon_number "1"; |  |
| oId "CUFF.96825.12"; tss_id "TSS69160"; |   |   |   |                                                                         |  |
| chr9 Cufflinks exon33781874 33782091    | . | - | . | gene_id "XLOC_055190"; transcript_id "TCONS_00090766"; exon_number "2"; |  |
| oId "CUFF.96825.12"; tss_id "TSS69160"; |   |   |   |                                                                         |  |
| chr9 Cufflinks exon33798366 33798555    | . | - | . | gene_id "XLOC_055190"; transcript_id "TCONS_00090766"; exon_number "3"; |  |
| oId "CUFF.96825.12"; tss_id "TSS69160"; |   |   |   |                                                                         |  |
| chr9 Cufflinks exon33799785 33799911    | . | - | . | gene_id "XLOC_055190"; transcript_id "TCONS_00090766"; exon_number "4"; |  |
| oId "CUFF.96825.12"; tss_id "TSS69160"; |   |   |   |                                                                         |  |
| chr9 Cufflinks exon33800558 33801002    | . | - | . | gene_id "XLOC_055190"; transcript_id "TCONS_00090766"; exon_number "5"; |  |
| oId "CUFF.96825.12"; tss_id "TSS69160"; |   |   |   |                                                                         |  |
| chr9 Cufflinks exon33817943 33818112    | . | - | . | gene_id "XLOC_055190"; transcript_id "TCONS_00090766"; exon_number "6"; |  |
| oId "CUFF.96825.12"; tss_id "TSS69160"; |   |   |   |                                                                         |  |
| chr9 Cufflinks exon33778551 33778749    | . | - | . | gene_id "XLOC_055190"; transcript_id "TCONS_00090768"; exon_number "1"; |  |
| oId "CUFF.96825.11"; tss_id "TSS69161"; |   |   |   |                                                                         |  |
| chr9 Cufflinks exon33798366 33798555    | . | - | . | gene_id "XLOC_055190"; transcript_id "TCONS_00090768"; exon_number "2"; |  |
| oId "CUFF.96825.11"; tss_id "TSS69161"; |   |   |   |                                                                         |  |
| chr9 Cufflinks exon33799785 33799911    | . | - | . | gene_id "XLOC_055190"; transcript_id "TCONS_00090768"; exon_number "3"; |  |
| oId "CUFF.96825.11"; tss_id "TSS69161"; |   |   |   |                                                                         |  |

|                                         |          |   |   |   |                                                                         |
|-----------------------------------------|----------|---|---|---|-------------------------------------------------------------------------|
| chr9 Cufflinks exon33818625             | 33818753 | . | - | . | gene_id "XLOC_055190"; transcript_id "TCONS_00090768"; exon_number "4"; |
| oId "CUFF.96825.11"; tss_id "TSS69161"; |          |   |   |   |                                                                         |
| chr9 Cufflinks exon33797647             | 33798555 | . | - | . | gene_id "XLOC_055190"; transcript_id "TCONS_00090773"; exon_number "1"; |
| oId "CUFF.96825.15"; tss_id "TSS69162"; |          |   |   |   |                                                                         |
| chr9 Cufflinks exon33799785             | 33799911 | . | - | . | gene_id "XLOC_055190"; transcript_id "TCONS_00090773"; exon_number "2"; |
| oId "CUFF.96825.15"; tss_id "TSS69162"; |          |   |   |   |                                                                         |
| chr9 Cufflinks exon33817943             | 33818268 | . | - | . | gene_id "XLOC_055190"; transcript_id "TCONS_00090773"; exon_number "3"; |
| oId "CUFF.96825.15"; tss_id "TSS69162"; |          |   |   |   |                                                                         |
| chr9 Cufflinks exon35646402             | 35646586 | . | - | . | gene_id "XLOC_055246"; transcript_id "TCONS_00090853"; exon_number "1"; |
| oId "CUFF.96999.1"; tss_id "TSS69231";  |          |   |   |   |                                                                         |
| chr9 Cufflinks exon35646700             | 35647136 | . | - | . | gene_id "XLOC_055246"; transcript_id "TCONS_00090853"; exon_number "2"; |
| oId "CUFF.96999.1"; tss_id "TSS69231";  |          |   |   |   |                                                                         |
| chr9 Cufflinks exon66523814             | 66524057 | . | - | . | gene_id "XLOC_055340"; transcript_id "TCONS_00091029"; exon_number "1"; |
| oId "CUFF.97441.2"; tss_id "TSS69349";  |          |   |   |   |                                                                         |
| chr9 Cufflinks exon66525014             | 66525128 | . | - | . | gene_id "XLOC_055340"; transcript_id "TCONS_00091029"; exon_number "2"; |
| oId "CUFF.97441.2"; tss_id "TSS69349";  |          |   |   |   |                                                                         |
| chr9 Cufflinks exon66553353             | 66553911 | . | - | . | gene_id "XLOC_055340"; transcript_id "TCONS_00091029"; exon_number "3"; |
| oId "CUFF.97441.2"; tss_id "TSS69349";  |          |   |   |   |                                                                         |
| chr9 Cufflinks exon66523814             | 66524057 | . | - | . | gene_id "XLOC_055340"; transcript_id "TCONS_00091028"; exon_number "1"; |
| oId "CUFF.97441.1"; tss_id "TSS69349";  |          |   |   |   |                                                                         |
| chr9 Cufflinks exon66525014             | 66525128 | . | - | . | gene_id "XLOC_055340"; transcript_id "TCONS_00091028"; exon_number "2"; |
| oId "CUFF.97441.1"; tss_id "TSS69349";  |          |   |   |   |                                                                         |
| chr9 Cufflinks exon66553243             | 66553911 | . | - | . | gene_id "XLOC_055340"; transcript_id "TCONS_00091028"; exon_number "3"; |
| oId "CUFF.97441.1"; tss_id "TSS69349";  |          |   |   |   |                                                                         |
| chr9 Cufflinks exon68423819             | 68424588 | . | - | . | gene_id "XLOC_055361"; transcript_id "TCONS_00091055"; exon_number "1"; |
| oId "CUFF.97549.12"; tss_id "TSS69372"; |          |   |   |   |                                                                         |
| chr9 Cufflinks exon68424897             | 68427492 | . | - | . | gene_id "XLOC_055361"; transcript_id "TCONS_00091055"; exon_number "2"; |
| oId "CUFF.97549.12"; tss_id "TSS69372"; |          |   |   |   |                                                                         |
| chr9 Cufflinks exon70207141             | 70210809 | . | - | . | gene_id "XLOC_055385"; transcript_id "TCONS_00091100"; exon_number "1"; |
| oId "CUFF.97701.3"; tss_id "TSS69405";  |          |   |   |   |                                                                         |
| chr9 Cufflinks exon70211215             | 70211260 | . | - | . | gene_id "XLOC_055385"; transcript_id "TCONS_00091100"; exon_number "2"; |
| oId "CUFF.97701.3"; tss_id "TSS69405";  |          |   |   |   |                                                                         |
| chr9 Cufflinks exon70211390             | 70211512 | . | - | . | gene_id "XLOC_055385"; transcript_id "TCONS_00091100"; exon_number "3"; |
| oId "CUFF.97701.3"; tss_id "TSS69405";  |          |   |   |   |                                                                         |
| chr9 Cufflinks exon70212122             | 70212153 | . | - | . | gene_id "XLOC_055385"; transcript_id "TCONS_00091100"; exon_number "4"; |
| oId "CUFF.97701.3"; tss_id "TSS69405";  |          |   |   |   |                                                                         |
| chr9 Cufflinks exon70207141             | 70210464 | . | - | . | gene_id "XLOC_055385"; transcript_id "TCONS_00091101"; exon_number "1"; |
| oId "CUFF.97701.2"; tss_id "TSS69406";  |          |   |   |   |                                                                         |
| chr9 Cufflinks exon70457974             | 70458265 | . | - | . | gene_id "XLOC_055385"; transcript_id "TCONS_00091101"; exon_number "2"; |
| oId "CUFF.97701.2"; tss_id "TSS69406";  |          |   |   |   |                                                                         |
| chr9 Cufflinks exon76736494             | 76738816 | . | - | . | gene_id "XLOC_055433"; transcript_id "TCONS_00091182"; exon_number "1"; |
| oId "CUFF.97908.1"; tss_id "TSS69462";  |          |   |   |   |                                                                         |
| chr9 Cufflinks exon76787848             | 76788054 | . | - | . | gene_id "XLOC_055433"; transcript_id "TCONS_00091182"; exon_number "2"; |

oId "CUFF.97908.1"; tss\_id "TSS69462";  
chr9 Cufflinks exon76789442 76789609 . - . gene\_id "XLOC\_055433"; transcript\_id "TCONS\_00091182"; exon\_number "3";  
oId "CUFF.97908.1"; tss\_id "TSS69462";  
chr9 Cufflinks exon76896785 76896906 . - . gene\_id "XLOC\_055433"; transcript\_id "TCONS\_00091182"; exon\_number "4";  
oId "CUFF.97908.1"; tss\_id "TSS69462";  
chr9 Cufflinks exon77088351 77088503 . - . gene\_id "XLOC\_055440"; transcript\_id "TCONS\_00091189"; exon\_number "1";  
oId "CUFF.97918.1"; tss\_id "TSS69469";  
chr9 Cufflinks exon77092583 77092663 . - . gene\_id "XLOC\_055440"; transcript\_id "TCONS\_00091189"; exon\_number "2";  
oId "CUFF.97918.1"; tss\_id "TSS69469";  
chr9 Cufflinks exon77098144 77098255 . - . gene\_id "XLOC\_055440"; transcript\_id "TCONS\_00091189"; exon\_number "3";  
oId "CUFF.97918.1"; tss\_id "TSS69469";  
chr9 Cufflinks exon77101040 77101205 . - . gene\_id "XLOC\_055440"; transcript\_id "TCONS\_00091189"; exon\_number "4";  
oId "CUFF.97918.1"; tss\_id "TSS69469";  
chr9 Cufflinks exon77113158 77113469 . - . gene\_id "XLOC\_055440"; transcript\_id "TCONS\_00091189"; exon\_number "5";  
oId "CUFF.97918.1"; tss\_id "TSS69469";  
chr9 Cufflinks exon85356737 85357198 . - . gene\_id "XLOC\_055475"; transcript\_id "TCONS\_00091257"; exon\_number "1";  
oId "CUFF.98127.2"; tss\_id "TSS69518";  
chr9 Cufflinks exon85357862 85359026 . - . gene\_id "XLOC\_055475"; transcript\_id "TCONS\_00091257"; exon\_number "2";  
oId "CUFF.98127.2"; tss\_id "TSS69518";  
chr9 Cufflinks exon85356737 85357198 . - . gene\_id "XLOC\_055475"; transcript\_id "TCONS\_00091258"; exon\_number "1";  
oId "CUFF.98127.3"; tss\_id "TSS69519";  
chr9 Cufflinks exon85359149 85359359 . - . gene\_id "XLOC\_055475"; transcript\_id "TCONS\_00091258"; exon\_number "2";  
oId "CUFF.98127.3"; tss\_id "TSS69519";  
chr9 Cufflinks exon85378306 85378644 . - . gene\_id "XLOC\_055475"; transcript\_id "TCONS\_00091258"; exon\_number "3";  
oId "CUFF.98127.3"; tss\_id "TSS69519";  
chr9 Cufflinks exon85359169 85359359 . - . gene\_id "XLOC\_055475"; transcript\_id "TCONS\_00091259"; exon\_number "1";  
oId "CUFF.98127.5"; tss\_id "TSS69520";  
chr9 Cufflinks exon85372640 85372777 . - . gene\_id "XLOC\_055475"; transcript\_id "TCONS\_00091259"; exon\_number "2";  
oId "CUFF.98127.5"; tss\_id "TSS69520";  
chr9 Cufflinks exon85375445 85378098 . - . gene\_id "XLOC\_055475"; transcript\_id "TCONS\_00091261"; exon\_number "1";  
oId "CUFF.98127.7"; tss\_id "TSS69521";  
chr9 Cufflinks exon85378306 85378850 . - . gene\_id "XLOC\_055475"; transcript\_id "TCONS\_00091261"; exon\_number "2";  
oId "CUFF.98127.7"; tss\_id "TSS69521";  
chr9 Cufflinks exon85375445 85376040 . - . gene\_id "XLOC\_055475"; transcript\_id "TCONS\_00091260"; exon\_number "1";  
oId "CUFF.98127.6"; tss\_id "TSS69521";  
chr9 Cufflinks exon85378306 85378850 . - . gene\_id "XLOC\_055475"; transcript\_id "TCONS\_00091260"; exon\_number "2";  
oId "CUFF.98127.6"; tss\_id "TSS69521";  
chr9 Cufflinks exon88148925 88149734 . - . gene\_id "XLOC\_055504"; transcript\_id "TCONS\_00091314"; exon\_number "1";  
oId "CUFF.98213.2"; tss\_id "TSS69559";  
chr9 Cufflinks exon88155327 88155665 . - . gene\_id "XLOC\_055504"; transcript\_id "TCONS\_00091314"; exon\_number "2";  
oId "CUFF.98213.2"; tss\_id "TSS69559";  
chr9 Cufflinks exon88148925 88149734 . - . gene\_id "XLOC\_055504"; transcript\_id "TCONS\_00091316"; exon\_number "1";  
oId "CUFF.98213.3"; tss\_id "TSS69560";

|                                        |          |   |   |   |                                                                         |
|----------------------------------------|----------|---|---|---|-------------------------------------------------------------------------|
| chr9 Cufflinks exon88150058            | 88156285 | . | - | . | gene_id "XLOC_055504"; transcript_id "TCONS_00091316"; exon_number "2"; |
| oId "CUFF.98213.3"; tss_id "TSS69560"; |          |   |   |   |                                                                         |
| chr9 Cufflinks exon91506792            | 91507088 | . | - | . | gene_id "XLOC_055531"; transcript_id "TCONS_00091361"; exon_number "1"; |
| oId "CUFF.98305.1"; tss_id "TSS69593"; |          |   |   |   |                                                                         |
| chr9 Cufflinks exon91507486            | 91507586 | . | - | . | gene_id "XLOC_055531"; transcript_id "TCONS_00091361"; exon_number "2"; |
| oId "CUFF.98305.1"; tss_id "TSS69593"; |          |   |   |   |                                                                         |
| chr9 Cufflinks exon91529724            | 91530414 | . | - | . | gene_id "XLOC_055531"; transcript_id "TCONS_00091361"; exon_number "3"; |
| oId "CUFF.98305.1"; tss_id "TSS69593"; |          |   |   |   |                                                                         |
| chr9 Cufflinks exon91522307            | 91522795 | . | - | . | gene_id "XLOC_055531"; transcript_id "TCONS_00091362"; exon_number "1"; |
| oId "CUFF.98305.2"; tss_id "TSS69594"; |          |   |   |   |                                                                         |
| chr9 Cufflinks exon91529724            | 91529981 | . | - | . | gene_id "XLOC_055531"; transcript_id "TCONS_00091362"; exon_number "2"; |
| oId "CUFF.98305.2"; tss_id "TSS69594"; |          |   |   |   |                                                                         |
| chr9 Cufflinks exon91531604            | 91531756 | . | - | . | gene_id "XLOC_055531"; transcript_id "TCONS_00091362"; exon_number "3"; |
| oId "CUFF.98305.2"; tss_id "TSS69594"; |          |   |   |   |                                                                         |
| chr9 Cufflinks exon91531937            | 91532107 | . | - | . | gene_id "XLOC_055531"; transcript_id "TCONS_00091362"; exon_number "4"; |
| oId "CUFF.98305.2"; tss_id "TSS69594"; |          |   |   |   |                                                                         |
| chr9 Cufflinks exon91538251            | 91538671 | . | - | . | gene_id "XLOC_055531"; transcript_id "TCONS_00091362"; exon_number "5"; |
| oId "CUFF.98305.2"; tss_id "TSS69594"; |          |   |   |   |                                                                         |
| chr9 Cufflinks exon91528958            | 91529981 | . | - | . | gene_id "XLOC_055531"; transcript_id "TCONS_00091363"; exon_number "1"; |
| oId "CUFF.98305.4"; tss_id "TSS69594"; |          |   |   |   |                                                                         |
| chr9 Cufflinks exon91531604            | 91531756 | . | - | . | gene_id "XLOC_055531"; transcript_id "TCONS_00091363"; exon_number "2"; |
| oId "CUFF.98305.4"; tss_id "TSS69594"; |          |   |   |   |                                                                         |
| chr9 Cufflinks exon91531937            | 91532107 | . | - | . | gene_id "XLOC_055531"; transcript_id "TCONS_00091363"; exon_number "3"; |
| oId "CUFF.98305.4"; tss_id "TSS69594"; |          |   |   |   |                                                                         |
| chr9 Cufflinks exon91538251            | 91538671 | . | - | . | gene_id "XLOC_055531"; transcript_id "TCONS_00091363"; exon_number "4"; |
| oId "CUFF.98305.4"; tss_id "TSS69594"; |          |   |   |   |                                                                         |
| chr9 Cufflinks exon93736077            | 93736567 | . | - | . | gene_id "XLOC_055552"; transcript_id "TCONS_00091395"; exon_number "1"; |
| oId "CUFF.98378.2"; tss_id "TSS69619"; |          |   |   |   |                                                                         |
| chr9 Cufflinks exon93739333            | 93739406 | . | - | . | gene_id "XLOC_055552"; transcript_id "TCONS_00091395"; exon_number "2"; |
| oId "CUFF.98378.2"; tss_id "TSS69619"; |          |   |   |   |                                                                         |
| chr9 Cufflinks exon93741517            | 93741697 | . | - | . | gene_id "XLOC_055552"; transcript_id "TCONS_00091395"; exon_number "3"; |
| oId "CUFF.98378.2"; tss_id "TSS69619"; |          |   |   |   |                                                                         |
| chr9 Cufflinks exon93736077            | 93736567 | . | - | . | gene_id "XLOC_055552"; transcript_id "TCONS_00091394"; exon_number "1"; |
| oId "CUFF.98378.1"; tss_id "TSS69619"; |          |   |   |   |                                                                         |
| chr9 Cufflinks exon93739333            | 93739406 | . | - | . | gene_id "XLOC_055552"; transcript_id "TCONS_00091394"; exon_number "2"; |
| oId "CUFF.98378.1"; tss_id "TSS69619"; |          |   |   |   |                                                                         |
| chr9 Cufflinks exon93741470            | 93741697 | . | - | . | gene_id "XLOC_055552"; transcript_id "TCONS_00091394"; exon_number "3"; |
| oId "CUFF.98378.1"; tss_id "TSS69619"; |          |   |   |   |                                                                         |
| chr9 Cufflinks exon93736077            | 93736567 | . | - | . | gene_id "XLOC_055552"; transcript_id "TCONS_00091396"; exon_number "1"; |
| oId "CUFF.98378.3"; tss_id "TSS69620"; |          |   |   |   |                                                                         |
| chr9 Cufflinks exon93739333            | 93739406 | . | - | . | gene_id "XLOC_055552"; transcript_id "TCONS_00091396"; exon_number "2"; |
| oId "CUFF.98378.3"; tss_id "TSS69620"; |          |   |   |   |                                                                         |
| chr9 Cufflinks exon93741764            | 93741979 | . | - | . | gene_id "XLOC_055552"; transcript_id "TCONS_00091396"; exon_number "3"; |

|                                        |   |   |   |                                                                         |  |
|----------------------------------------|---|---|---|-------------------------------------------------------------------------|--|
| oId "CUFF.98378.3"; tss_id "TSS69620"; |   |   |   |                                                                         |  |
| chr9 Cufflinks exon93739006 93739227   | . | - | . | gene_id "XLOC_055552"; transcript_id "TCONS_00091397"; exon_number "1"; |  |
| oId "CUFF.98378.4"; tss_id "TSS69619"; |   |   |   |                                                                         |  |
| chr9 Cufflinks exon93739333 93739406   | . | - | . | gene_id "XLOC_055552"; transcript_id "TCONS_00091397"; exon_number "2"; |  |
| oId "CUFF.98378.4"; tss_id "TSS69619"; |   |   |   |                                                                         |  |
| chr9 Cufflinks exon93741470 93741697   | . | - | . | gene_id "XLOC_055552"; transcript_id "TCONS_00091397"; exon_number "3"; |  |
| oId "CUFF.98378.4"; tss_id "TSS69619"; |   |   |   |                                                                         |  |
| chr9 Cufflinks exon93867433 93867664   | . | - | . | gene_id "XLOC_055558"; transcript_id "TCONS_00091403"; exon_number "1"; |  |
| oId "CUFF.98386.1"; tss_id "TSS69626"; |   |   |   |                                                                         |  |
| chr9 Cufflinks exon93868747 93868953   | . | - | . | gene_id "XLOC_055558"; transcript_id "TCONS_00091403"; exon_number "2"; |  |
| oId "CUFF.98386.1"; tss_id "TSS69626"; |   |   |   |                                                                         |  |
| chr9 Cufflinks exon93925460 93925730   | . | - | . | gene_id "XLOC_055558"; transcript_id "TCONS_00091403"; exon_number "3"; |  |
| oId "CUFF.98386.1"; tss_id "TSS69626"; |   |   |   |                                                                         |  |
| chr9 Cufflinks exon95569421 95570369   | . | - | . | gene_id "XLOC_055589"; transcript_id "TCONS_00091452"; exon_number "1"; |  |
| oId "CUFF.98449.1"; tss_id "TSS69665"; |   |   |   |                                                                         |  |
| chr9 Cufflinks exon95585526 95585562   | . | - | . | gene_id "XLOC_055589"; transcript_id "TCONS_00091452"; exon_number "2"; |  |
| oId "CUFF.98449.1"; tss_id "TSS69665"; |   |   |   |                                                                         |  |
| chr9 Cufflinks exon98172770 98173959   | . | - | . | gene_id "XLOC_055617"; transcript_id "TCONS_00091488"; exon_number "1"; |  |
| oId "CUFF.98542.6"; tss_id "TSS69696"; |   |   |   |                                                                         |  |
| chr9 Cufflinks exon98189006 98189079   | . | - | . | gene_id "XLOC_055617"; transcript_id "TCONS_00091488"; exon_number "2"; |  |
| oId "CUFF.98542.6"; tss_id "TSS69696"; |   |   |   |                                                                         |  |
| chr9 Cufflinks exon98172770 98173959   | . | - | . | gene_id "XLOC_055617"; transcript_id "TCONS_00091489"; exon_number "1"; |  |
| oId "CUFF.98542.5"; tss_id "TSS69697"; |   |   |   |                                                                         |  |
| chr9 Cufflinks exon98185383 98185574   | . | - | . | gene_id "XLOC_055617"; transcript_id "TCONS_00091489"; exon_number "2"; |  |
| oId "CUFF.98542.5"; tss_id "TSS69697"; |   |   |   |                                                                         |  |
| chr9 Cufflinks exon98189006 98189273   | . | - | . | gene_id "XLOC_055617"; transcript_id "TCONS_00091489"; exon_number "3"; |  |
| oId "CUFF.98542.5"; tss_id "TSS69697"; |   |   |   |                                                                         |  |
| chr9 Cufflinks exon98568370 98576204   | . | - | . | gene_id "XLOC_055623"; transcript_id "TCONS_00091503"; exon_number "1"; |  |
| oId "CUFF.98553.1"; tss_id "TSS69711"; |   |   |   |                                                                         |  |
| chr9 Cufflinks exon98612509 98612574   | . | - | . | gene_id "XLOC_055623"; transcript_id "TCONS_00091503"; exon_number "2"; |  |
| oId "CUFF.98553.1"; tss_id "TSS69711"; |   |   |   |                                                                         |  |
| chr9 Cufflinks exon98638147 98638259   | . | - | . | gene_id "XLOC_055623"; transcript_id "TCONS_00091503"; exon_number "3"; |  |
| oId "CUFF.98553.1"; tss_id "TSS69711"; |   |   |   |                                                                         |  |
| chr9 Cufflinks exon102348068 102348932 | . | - | . | gene_id "XLOC_055703"; transcript_id "TCONS_00091622"; exon_number "1"; |  |
| oId "CUFF.98808.1"; tss_id "TSS69811"; |   |   |   |                                                                         |  |
| chr9 Cufflinks exon102349167 102349266 | . | - | . | gene_id "XLOC_055703"; transcript_id "TCONS_00091622"; exon_number "2"; |  |
| oId "CUFF.98808.1"; tss_id "TSS69811"; |   |   |   |                                                                         |  |
| chr9 Cufflinks exon102350707 102350868 | . | - | . | gene_id "XLOC_055703"; transcript_id "TCONS_00091622"; exon_number "3"; |  |
| oId "CUFF.98808.1"; tss_id "TSS69811"; |   |   |   |                                                                         |  |
| chr9 Cufflinks exon102358472 102358569 | . | - | . | gene_id "XLOC_055703"; transcript_id "TCONS_00091622"; exon_number "4"; |  |
| oId "CUFF.98808.1"; tss_id "TSS69811"; |   |   |   |                                                                         |  |
| chr9 Cufflinks exon102480441 102480569 | . | - | . | gene_id "XLOC_055703"; transcript_id "TCONS_00091622"; exon_number "5"; |  |
| oId "CUFF.98808.1"; tss_id "TSS69811"; |   |   |   |                                                                         |  |



chr9 Cufflinks exon102568153 102576582 . - . gene\_id "XLOC\_055703"; transcript\_id "TCONS\_00091622"; exon\_number "6";  
oId "CUFF.98808.1"; tss\_id "TSS69811";  
chr9 Cufflinks exon102348068 102348932 . - . gene\_id "XLOC\_055703"; transcript\_id "TCONS\_00091623"; exon\_number "1";  
oId "CUFF.98808.2"; tss\_id "TSS69812";  
chr9 Cufflinks exon102349167 102349266 . - . gene\_id "XLOC\_055703"; transcript\_id "TCONS\_00091623"; exon\_number "2";  
oId "CUFF.98808.2"; tss\_id "TSS69812";  
chr9 Cufflinks exon102350707 102350868 . - . gene\_id "XLOC\_055703"; transcript\_id "TCONS\_00091623"; exon\_number "3";  
oId "CUFF.98808.2"; tss\_id "TSS69812";  
chr9 Cufflinks exon102358472 102358569 . - . gene\_id "XLOC\_055703"; transcript\_id "TCONS\_00091623"; exon\_number "4";  
oId "CUFF.98808.2"; tss\_id "TSS69812";  
chr9 Cufflinks exon102480441 102480569 . - . gene\_id "XLOC\_055703"; transcript\_id "TCONS\_00091623"; exon\_number "5";  
oId "CUFF.98808.2"; tss\_id "TSS69812";  
chr9 Cufflinks exon102568153 102568273 . - . gene\_id "XLOC\_055703"; transcript\_id "TCONS\_00091623"; exon\_number "6";  
oId "CUFF.98808.2"; tss\_id "TSS69812";  
chr9 Cufflinks exon102582103 102582171 . - . gene\_id "XLOC\_055703"; transcript\_id "TCONS\_00091623"; exon\_number "7";  
oId "CUFF.98808.2"; tss\_id "TSS69812";  
chr9 Cufflinks exon102480179 102480569 . - . gene\_id "XLOC\_055703"; transcript\_id "TCONS\_00091628"; exon\_number "1";  
oId "CUFF.98808.4"; tss\_id "TSS69813";  
chr9 Cufflinks exon102568153 102568162 . - . gene\_id "XLOC\_055703"; transcript\_id "TCONS\_00091628"; exon\_number "2";  
oId "CUFF.98808.4"; tss\_id "TSS69813";  
chr9 Cufflinks exon102534688 102535922 . - . gene\_id "XLOC\_055703"; transcript\_id "TCONS\_00091632"; exon\_number "1";  
oId "CUFF.98808.5"; tss\_id "TSS69812";  
chr9 Cufflinks exon102568154 102568273 . - . gene\_id "XLOC\_055703"; transcript\_id "TCONS\_00091632"; exon\_number "2";  
oId "CUFF.98808.5"; tss\_id "TSS69812";  
chr9 Cufflinks exon102582103 102582171 . - . gene\_id "XLOC\_055703"; transcript\_id "TCONS\_00091632"; exon\_number "3";  
oId "CUFF.98808.5"; tss\_id "TSS69812";  
chr9 Cufflinks exon102648600 102648978 . - . gene\_id "XLOC\_055724"; transcript\_id "TCONS\_00091647"; exon\_number "1";  
oId "CUFF.98808.9"; tss\_id "TSS69834";  
chr9 Cufflinks exon102657163 102657287 . - . gene\_id "XLOC\_055724"; transcript\_id "TCONS\_00091647"; exon\_number "2";  
oId "CUFF.98808.9"; tss\_id "TSS69834";  
chr9 Cufflinks exon102668836 102668883 . - . gene\_id "XLOC\_055724"; transcript\_id "TCONS\_00091647"; exon\_number "3";  
oId "CUFF.98808.9"; tss\_id "TSS69834";  
chr9 Cufflinks exon102648600 102648977 . - . gene\_id "XLOC\_055724"; transcript\_id "TCONS\_00091646"; exon\_number "1";  
oId "CUFF.98808.10"; tss\_id "TSS69834";  
chr9 Cufflinks exon102657162 102657287 . - . gene\_id "XLOC\_055724"; transcript\_id "TCONS\_00091646"; exon\_number "2";  
oId "CUFF.98808.10"; tss\_id "TSS69834";  
chr9 Cufflinks exon102668836 102668883 . - . gene\_id "XLOC\_055724"; transcript\_id "TCONS\_00091646"; exon\_number "3";  
oId "CUFF.98808.10"; tss\_id "TSS69834";  
chr9 Cufflinks exon106827258 106827287 . - . gene\_id "XLOC\_055734"; transcript\_id "TCONS\_00091662"; exon\_number "1";  
oId "CUFF.98889.1"; tss\_id "TSS69846";  
chr9 Cufflinks exon106848737 106848822 . - . gene\_id "XLOC\_055734"; transcript\_id "TCONS\_00091662"; exon\_number "2";  
oId "CUFF.98889.1"; tss\_id "TSS69846";  
chr9 Cufflinks exon106849321 106849436 . - . gene\_id "XLOC\_055734"; transcript\_id "TCONS\_00091662"; exon\_number "3";

oId "CUFF.98889.1"; tss\_id "TSS69846";  
chr9 Cufflinks exon106854370 106856284 . - . gene\_id "XLOC\_055734"; transcript\_id "TCONS\_00091662"; exon\_number "4";  
oId "CUFF.98889.1"; tss\_id "TSS69846";  
chr9 Cufflinks exon108316316 108316624 . - . gene\_id "XLOC\_055746"; transcript\_id "TCONS\_00091678"; exon\_number "1";  
oId "CUFF.98974.2"; tss\_id "TSS69859";  
chr9 Cufflinks exon108319395 108319456 . - . gene\_id "XLOC\_055746"; transcript\_id "TCONS\_00091678"; exon\_number "2";  
oId "CUFF.98974.2"; tss\_id "TSS69859";  
chr9 Cufflinks exon108320082 108320365 . - . gene\_id "XLOC\_055746"; transcript\_id "TCONS\_00091678"; exon\_number "3";  
oId "CUFF.98974.2"; tss\_id "TSS69859";  
chr9 Cufflinks exon108319361 108319456 . - . gene\_id "XLOC\_055746"; transcript\_id "TCONS\_00091679"; exon\_number "1";  
oId "CUFF.98974.3"; tss\_id "TSS69859";  
chr9 Cufflinks exon108320051 108320357 . - . gene\_id "XLOC\_055746"; transcript\_id "TCONS\_00091679"; exon\_number "2";  
oId "CUFF.98974.3"; tss\_id "TSS69859";  
chr9 Cufflinks exon130870862 130871382 . - . gene\_id "XLOC\_055923"; transcript\_id "TCONS\_00092028"; exon\_number "1";  
oId "CUFF.99629.1"; tss\_id "TSS70107";  
chr9 Cufflinks exon130873961 130874078 . - . gene\_id "XLOC\_055923"; transcript\_id "TCONS\_00092028"; exon\_number "2";  
oId "CUFF.99629.1"; tss\_id "TSS70107";  
chr9 Cufflinks exon130875652 130876965 . - . gene\_id "XLOC\_055923"; transcript\_id "TCONS\_00092028"; exon\_number "3";  
oId "CUFF.99629.1"; tss\_id "TSS70107";  
chr9 Cufflinks exon130877353 130877568 . - . gene\_id "XLOC\_055923"; transcript\_id "TCONS\_00092028"; exon\_number "4";  
oId "CUFF.99629.1"; tss\_id "TSS70107";  
chr9 Cufflinks exon130879989 130880114 . - . gene\_id "XLOC\_055923"; transcript\_id "TCONS\_00092028"; exon\_number "5";  
oId "CUFF.99629.1"; tss\_id "TSS70107";  
chr9 Cufflinks exon130880202 130882172 . - . gene\_id "XLOC\_055923"; transcript\_id "TCONS\_00092028"; exon\_number "6";  
oId "CUFF.99629.1"; tss\_id "TSS70107";  
chr9 Cufflinks exon131106673 131106691 . - . gene\_id "XLOC\_055923"; transcript\_id "TCONS\_00092028"; exon\_number "7";  
oId "CUFF.99629.1"; tss\_id "TSS70107";  
chr9 Cufflinks exon131290866 131291279 . - . gene\_id "XLOC\_055931"; transcript\_id "TCONS\_00092045"; exon\_number "1";  
oId "CUFF.99691.1"; tss\_id "TSS70117";  
chr9 Cufflinks exon131299106 131299234 . - . gene\_id "XLOC\_055931"; transcript\_id "TCONS\_00092045"; exon\_number "2";  
oId "CUFF.99691.1"; tss\_id "TSS70117";  
chr9 Cufflinks exon131305658 131305963 . - . gene\_id "XLOC\_055931"; transcript\_id "TCONS\_00092045"; exon\_number "3";  
oId "CUFF.99691.1"; tss\_id "TSS70117";  
chr9 Cufflinks exon131314647 131314679 . - . gene\_id "XLOC\_055931"; transcript\_id "TCONS\_00092045"; exon\_number "4";  
oId "CUFF.99691.1"; tss\_id "TSS70117";  
chr9 Cufflinks exon134698268 134700203 . - . gene\_id "XLOC\_055971"; transcript\_id "TCONS\_00092104"; exon\_number "1";  
oId "CUFF.99855.1"; tss\_id "TSS70161";  
chr9 Cufflinks exon134701021 134701305 . - . gene\_id "XLOC\_055971"; transcript\_id "TCONS\_00092104"; exon\_number "2";  
oId "CUFF.99855.1"; tss\_id "TSS70161";  
chr9 Cufflinks exon134698268 134701135 . - . gene\_id "XLOC\_055971"; transcript\_id "TCONS\_00092105"; exon\_number "1";  
oId "CUFF.99855.2"; tss\_id "TSS70162";  
chr9 Cufflinks exon134703355 134704005 . - . gene\_id "XLOC\_055971"; transcript\_id "TCONS\_00092105"; exon\_number "2";  
oId "CUFF.99855.2"; tss\_id "TSS70162";

|                                         |           |   |   |   |                                                                         |
|-----------------------------------------|-----------|---|---|---|-------------------------------------------------------------------------|
| chr9 Cufflinks exon134703127            | 134703923 | . | - | . | gene_id "XLOC_055971"; transcript_id "TCONS_00092106"; exon_number "1"; |
| oId "CUFF.99855.3"; tss_id "TSS70163";  |           |   |   |   |                                                                         |
| chr9 Cufflinks exon134714123            | 134714877 | . | - | . | gene_id "XLOC_055971"; transcript_id "TCONS_00092106"; exon_number "2"; |
| oId "CUFF.99855.3"; tss_id "TSS70163";  |           |   |   |   |                                                                         |
| chr9 Cufflinks exon138994869            | 138995472 | . | - | . | gene_id "XLOC_056029"; transcript_id "TCONS_00092214"; exon_number "1"; |
| oId "CUFF.100017.6"; tss_id "TSS70250"; |           |   |   |   |                                                                         |
| chr9 Cufflinks exon138996248            | 138996378 | . | - | . | gene_id "XLOC_056029"; transcript_id "TCONS_00092214"; exon_number "2"; |
| oId "CUFF.100017.6"; tss_id "TSS70250"; |           |   |   |   |                                                                         |
| chr9 Cufflinks exon138999285            | 138999431 | . | - | . | gene_id "XLOC_056029"; transcript_id "TCONS_00092214"; exon_number "3"; |
| oId "CUFF.100017.6"; tss_id "TSS70250"; |           |   |   |   |                                                                         |
| chr9 Cufflinks exon138994869            | 138995472 | . | - | . | gene_id "XLOC_056029"; transcript_id "TCONS_00092215"; exon_number "1"; |
| oId "CUFF.100017.5"; tss_id "TSS70248"; |           |   |   |   |                                                                         |
| chr9 Cufflinks exon138996248            | 138996434 | . | - | . | gene_id "XLOC_056029"; transcript_id "TCONS_00092215"; exon_number "2"; |
| oId "CUFF.100017.5"; tss_id "TSS70248"; |           |   |   |   |                                                                         |
| chr9 Cufflinks exon138999285            | 139000665 | . | - | . | gene_id "XLOC_056029"; transcript_id "TCONS_00092215"; exon_number "3"; |
| oId "CUFF.100017.5"; tss_id "TSS70248"; |           |   |   |   |                                                                         |
| chr9 Cufflinks exon139001211            | 139001610 | . | - | . | gene_id "XLOC_056029"; transcript_id "TCONS_00092215"; exon_number "4"; |
| oId "CUFF.100017.5"; tss_id "TSS70248"; |           |   |   |   |                                                                         |
| chr9 Cufflinks exon138999622            | 139000665 | . | - | . | gene_id "XLOC_056029"; transcript_id "TCONS_00092218"; exon_number "1"; |
| oId "CUFF.100017.7"; tss_id "TSS70252"; |           |   |   |   |                                                                         |
| chr9 Cufflinks exon139002066            | 139002500 | . | - | . | gene_id "XLOC_056029"; transcript_id "TCONS_00092218"; exon_number "2"; |
| oId "CUFF.100017.7"; tss_id "TSS70252"; |           |   |   |   |                                                                         |
| chr9 Cufflinks exon138999622            | 139000665 | . | - | . | gene_id "XLOC_056029"; transcript_id "TCONS_00092219"; exon_number "1"; |
| oId "CUFF.100017.8"; tss_id "TSS70253"; |           |   |   |   |                                                                         |
| chr9 Cufflinks exon139003684            | 139003818 | . | - | . | gene_id "XLOC_056029"; transcript_id "TCONS_00092219"; exon_number "2"; |
| oId "CUFF.100017.8"; tss_id "TSS70253"; |           |   |   |   |                                                                         |
| chr9 Cufflinks exon139451279            | 139459877 | . | - | . | gene_id "XLOC_056055"; transcript_id "TCONS_00092279"; exon_number "1"; |
| oId "CUFF.100067.3"; tss_id "TSS70291"; |           |   |   |   |                                                                         |
| chr9 Cufflinks exon139467429            | 139467769 | . | - | . | gene_id "XLOC_056055"; transcript_id "TCONS_00092279"; exon_number "2"; |
| oId "CUFF.100067.3"; tss_id "TSS70291"; |           |   |   |   |                                                                         |
| chr9 Cufflinks exon139471676            | 139471952 | . | - | . | gene_id "XLOC_056055"; transcript_id "TCONS_00092279"; exon_number "3"; |
| oId "CUFF.100067.3"; tss_id "TSS70291"; |           |   |   |   |                                                                         |
| chr9 Cufflinks exon139477025            | 139477211 | . | - | . | gene_id "XLOC_056055"; transcript_id "TCONS_00092279"; exon_number "4"; |
| oId "CUFF.100067.3"; tss_id "TSS70291"; |           |   |   |   |                                                                         |
| chr9 Cufflinks exon139482088            | 139482845 | . | - | . | gene_id "XLOC_056055"; transcript_id "TCONS_00092279"; exon_number "5"; |
| oId "CUFF.100067.3"; tss_id "TSS70291"; |           |   |   |   |                                                                         |
| chr9 Cufflinks exon139461980            | 139467769 | . | - | . | gene_id "XLOC_056055"; transcript_id "TCONS_00092280"; exon_number "1"; |
| oId "CUFF.100067.4"; tss_id "TSS70292"; |           |   |   |   |                                                                         |
| chr9 Cufflinks exon139471676            | 139472209 | . | - | . | gene_id "XLOC_056055"; transcript_id "TCONS_00092280"; exon_number "2"; |
| oId "CUFF.100067.4"; tss_id "TSS70292"; |           |   |   |   |                                                                         |
| chr9 Cufflinks exon139468356            | 139470416 | . | - | . | gene_id "XLOC_056055"; transcript_id "TCONS_00092281"; exon_number "1"; |
| oId "CUFF.100067.7"; tss_id "TSS70293"; |           |   |   |   |                                                                         |
| chr9 Cufflinks exon139471676            | 139471952 | . | - | . | gene_id "XLOC_056055"; transcript_id "TCONS_00092281"; exon_number "2"; |

|                                          |   |   |   |                                                                         |  |
|------------------------------------------|---|---|---|-------------------------------------------------------------------------|--|
| oId "CUFF.100067.7"; tss_id "TSS70293";  |   |   |   |                                                                         |  |
| chr9 Cufflinks exon139477025 139477211   | . | - | . | gene_id "XLOC_056055"; transcript_id "TCONS_00092281"; exon_number "3"; |  |
| oId "CUFF.100067.7"; tss_id "TSS70293";  |   |   |   |                                                                         |  |
| chr9 Cufflinks exon139479320 139482410   | . | - | . | gene_id "XLOC_056055"; transcript_id "TCONS_00092281"; exon_number "4"; |  |
| oId "CUFF.100067.7"; tss_id "TSS70293";  |   |   |   |                                                                         |  |
| chr9 Cufflinks exon139468356 139470416   | . | - | . | gene_id "XLOC_056055"; transcript_id "TCONS_00092282"; exon_number "1"; |  |
| oId "CUFF.100067.8"; tss_id "TSS70291";  |   |   |   |                                                                         |  |
| chr9 Cufflinks exon139471676 139471747   | . | - | . | gene_id "XLOC_056055"; transcript_id "TCONS_00092282"; exon_number "2"; |  |
| oId "CUFF.100067.8"; tss_id "TSS70291";  |   |   |   |                                                                         |  |
| chr9 Cufflinks exon139471903 139471952   | . | - | . | gene_id "XLOC_056055"; transcript_id "TCONS_00092282"; exon_number "3"; |  |
| oId "CUFF.100067.8"; tss_id "TSS70291";  |   |   |   |                                                                         |  |
| chr9 Cufflinks exon139477025 139477211   | . | - | . | gene_id "XLOC_056055"; transcript_id "TCONS_00092282"; exon_number "4"; |  |
| oId "CUFF.100067.8"; tss_id "TSS70291";  |   |   |   |                                                                         |  |
| chr9 Cufflinks exon139478377 139480404   | . | - | . | gene_id "XLOC_056055"; transcript_id "TCONS_00092282"; exon_number "5"; |  |
| oId "CUFF.100067.8"; tss_id "TSS70291";  |   |   |   |                                                                         |  |
| chr9 Cufflinks exon139482088 139482845   | . | - | . | gene_id "XLOC_056055"; transcript_id "TCONS_00092282"; exon_number "6"; |  |
| oId "CUFF.100067.8"; tss_id "TSS70291";  |   |   |   |                                                                         |  |
| chr9 Cufflinks exon139470438 139471952   | . | - | . | gene_id "XLOC_056055"; transcript_id "TCONS_00092283"; exon_number "1"; |  |
| oId "CUFF.100067.11"; tss_id "TSS70293"; |   |   |   |                                                                         |  |
| chr9 Cufflinks exon139482088 139482410   | . | - | . | gene_id "XLOC_056055"; transcript_id "TCONS_00092283"; exon_number "2"; |  |
| oId "CUFF.100067.11"; tss_id "TSS70293"; |   |   |   |                                                                         |  |
| chr9 Cufflinks exon139619046 139619562   | . | - | . | gene_id "XLOC_056066"; transcript_id "TCONS_00092298"; exon_number "1"; |  |
| oId "CUFF.100095.1"; tss_id "TSS70305";  |   |   |   |                                                                         |  |
| chr9 Cufflinks exon139620763 139620868   | . | - | . | gene_id "XLOC_056066"; transcript_id "TCONS_00092298"; exon_number "2"; |  |
| oId "CUFF.100095.1"; tss_id "TSS70305";  |   |   |   |                                                                         |  |
| chr9 Cufflinks exon139621498 139621538   | . | - | . | gene_id "XLOC_056066"; transcript_id "TCONS_00092298"; exon_number "3"; |  |
| oId "CUFF.100095.1"; tss_id "TSS70305";  |   |   |   |                                                                         |  |
| chr9 Cufflinks exon139622333 139622636   | . | - | . | gene_id "XLOC_056066"; transcript_id "TCONS_00092298"; exon_number "4"; |  |
| oId "CUFF.100095.1"; tss_id "TSS70305";  |   |   |   |                                                                         |  |
| chr9 Cufflinks exon139619046 139619391   | . | - | . | gene_id "XLOC_056066"; transcript_id "TCONS_00092299"; exon_number "1"; |  |
| oId "CUFF.100095.2"; tss_id "TSS70305";  |   |   |   |                                                                         |  |
| chr9 Cufflinks exon139619507 139619562   | . | - | . | gene_id "XLOC_056066"; transcript_id "TCONS_00092299"; exon_number "2"; |  |
| oId "CUFF.100095.2"; tss_id "TSS70305";  |   |   |   |                                                                         |  |
| chr9 Cufflinks exon139620763 139621538   | . | - | . | gene_id "XLOC_056066"; transcript_id "TCONS_00092299"; exon_number "3"; |  |
| oId "CUFF.100095.2"; tss_id "TSS70305";  |   |   |   |                                                                         |  |
| chr9 Cufflinks exon139622333 139622655   | . | - | . | gene_id "XLOC_056066"; transcript_id "TCONS_00092299"; exon_number "4"; |  |
| oId "CUFF.100095.2"; tss_id "TSS70305";  |   |   |   |                                                                         |  |
| chr9 Cufflinks exon139619684 139621538   | . | - | . | gene_id "XLOC_056066"; transcript_id "TCONS_00092300"; exon_number "1"; |  |
| oId "CUFF.100095.3"; tss_id "TSS70305";  |   |   |   |                                                                         |  |
| chr9 Cufflinks exon139622333 139622636   | . | - | . | gene_id "XLOC_056066"; transcript_id "TCONS_00092300"; exon_number "2"; |  |
| oId "CUFF.100095.3"; tss_id "TSS70305";  |   |   |   |                                                                         |  |
| chr9 Cufflinks exon139774301 139779588   | . | - | . | gene_id "XLOC_056076"; transcript_id "TCONS_00092317"; exon_number "1"; |  |
| oId "CUFF.100124.2"; tss_id "TSS70317";  |   |   |   |                                                                         |  |

chr9 Cufflinks exon139779745 139780137 . - . gene\_id "XLOC\_056076"; transcript\_id "TCONS\_00092317"; exon\_number "2";  
oId "CUFF.100124.2"; tss\_id "TSS70317";

chr9 Cufflinks exon139774301 139779586 . - . gene\_id "XLOC\_056076"; transcript\_id "TCONS\_00092318"; exon\_number "1";  
oId "CUFF.100124.1"; tss\_id "TSS70318";

chr9 Cufflinks exon139779745 139779811 . - . gene\_id "XLOC\_056076"; transcript\_id "TCONS\_00092318"; exon\_number "2";  
oId "CUFF.100124.1"; tss\_id "TSS70318";

chr9 Cufflinks exon139780559 139780591 . - . gene\_id "XLOC\_056076"; transcript\_id "TCONS\_00092318"; exon\_number "3";  
oId "CUFF.100124.1"; tss\_id "TSS70318";

chr9 Cufflinks exon139774301 139779586 . - . gene\_id "XLOC\_056076"; transcript\_id "TCONS\_00092319"; exon\_number "1";  
oId "CUFF.100124.3"; tss\_id "TSS70319";

chr9 Cufflinks exon139779745 139780703 . - . gene\_id "XLOC\_056076"; transcript\_id "TCONS\_00092319"; exon\_number "2";  
oId "CUFF.100124.3"; tss\_id "TSS70319";

chr9 Cufflinks exon140144542 140145819 . - . gene\_id "XLOC\_056110"; transcript\_id "TCONS\_00092368"; exon\_number "1";  
oId "CUFF.100198.4"; tss\_id "TSS70358";

chr9 Cufflinks exon140146843 140146958 . - . gene\_id "XLOC\_056110"; transcript\_id "TCONS\_00092368"; exon\_number "2";  
oId "CUFF.100198.4"; tss\_id "TSS70358";

chr9 Cufflinks exon140147327 140147427 . - . gene\_id "XLOC\_056110"; transcript\_id "TCONS\_00092368"; exon\_number "3";  
oId "CUFF.100198.4"; tss\_id "TSS70358";

chr9 Cufflinks exon140147615 140148967 . - . gene\_id "XLOC\_056110"; transcript\_id "TCONS\_00092368"; exon\_number "4";  
oId "CUFF.100198.4"; tss\_id "TSS70358";

chr9 Cufflinks exon140144542 140146958 . - . gene\_id "XLOC\_056110"; transcript\_id "TCONS\_00092367"; exon\_number "1";  
oId "CUFF.100198.1"; tss\_id "TSS70358";

chr9 Cufflinks exon140147327 140147427 . - . gene\_id "XLOC\_056110"; transcript\_id "TCONS\_00092367"; exon\_number "2";  
oId "CUFF.100198.1"; tss\_id "TSS70358";

chr9 Cufflinks exon140147615 140148967 . - . gene\_id "XLOC\_056110"; transcript\_id "TCONS\_00092367"; exon\_number "3";  
oId "CUFF.100198.1"; tss\_id "TSS70358";

chr9 Cufflinks exon140144542 140145819 . - . gene\_id "XLOC\_056110"; transcript\_id "TCONS\_00092370"; exon\_number "1";  
oId "CUFF.100198.3"; tss\_id "TSS70359";

chr9 Cufflinks exon140146843 140147427 . - . gene\_id "XLOC\_056110"; transcript\_id "TCONS\_00092370"; exon\_number "2";  
oId "CUFF.100198.3"; tss\_id "TSS70359";

chr9 Cufflinks exon 140147615 140149589 . - . gene\_id "XLOC\_056110"; transcript\_id "TCONS\_00092370";  
exon\_number "3"; oId "CUFF.100198.3"; tss\_id "TSS70359";

chr9 Cufflinks exon 140144542 140144738 . - . gene\_id "XLOC\_056110"; transcript\_id "TCONS\_00092369";  
exon\_number "1"; oId "CUFF.100198.2"; tss\_id "TSS70359";

chr9 Cufflinks exon 140145684 140149589 . - . gene\_id "XLOC\_056110"; transcript\_id "TCONS\_00092369";  
exon\_number "2"; oId "CUFF.100198.2"; tss\_id "TSS70359";

chrX Cufflinks exon 11811179 11811287 . + . gene\_id "XLOC\_056175"; transcript\_id "TCONS\_00092480";  
exon\_number "1"; oId "CUFF.100544.1"; tss\_id "TSS70446";

chrX Cufflinks exon 11811715 11812854 . + . gene\_id "XLOC\_056175"; transcript\_id "TCONS\_00092480";  
exon\_number "2"; oId "CUFF.100544.1"; tss\_id "TSS70446";

chrX Cufflinks exon 39796940 39797122 . + . gene\_id "XLOC\_056301"; transcript\_id "TCONS\_00092701";  
exon\_number "1"; oId "CUFF.100938.2"; tss\_id "TSS70601";

chrX Cufflinks exon 39797321 39798267 . + . gene\_id "XLOC\_056301"; transcript\_id "TCONS\_00092701";

exon\_number "2"; oId "CUFF.100938.2"; tss\_id "TSS70601";  
chrX Cufflinks exon 39796940 39797122 . + . gene\_id "XLOC\_056301"; transcript\_id "TCONS\_00092702";  
exon\_number "1"; oId "CUFF.100938.1"; tss\_id "TSS70601";  
chrX Cufflinks exon 39803075 39803242 . + . gene\_id "XLOC\_056301"; transcript\_id "TCONS\_00092702";  
exon\_number "2"; oId "CUFF.100938.1"; tss\_id "TSS70601";  
chrX Cufflinks exon 39812997 39818684 . + . gene\_id "XLOC\_056301"; transcript\_id "TCONS\_00092702";  
exon\_number "3"; oId "CUFF.100938.1"; tss\_id "TSS70601";  
chrX Cufflinks exon 39797001 39797122 . + . gene\_id "XLOC\_056301"; transcript\_id "TCONS\_00092704";  
exon\_number "1"; oId "CUFF.100938.4"; tss\_id "TSS70601";  
chrX Cufflinks exon 39812593 39812677 . + . gene\_id "XLOC\_056301"; transcript\_id "TCONS\_00092704";  
exon\_number "2"; oId "CUFF.100938.4"; tss\_id "TSS70601";  
chrX Cufflinks exon 39812997 39818684 . + . gene\_id "XLOC\_056301"; transcript\_id "TCONS\_00092704";  
exon\_number "3"; oId "CUFF.100938.4"; tss\_id "TSS70601";  
chrX Cufflinks exon 39797001 39797122 . + . gene\_id "XLOC\_056301"; transcript\_id "TCONS\_00092703";  
exon\_number "1"; oId "CUFF.100938.3"; tss\_id "TSS70601";  
chrX Cufflinks exon 39812997 39818684 . + . gene\_id "XLOC\_056301"; transcript\_id "TCONS\_00092703";  
exon\_number "2"; oId "CUFF.100938.3"; tss\_id "TSS70601";  
chrX Cufflinks exon 39865471 39866131 . + . gene\_id "XLOC\_056303"; transcript\_id "TCONS\_00092708";  
exon\_number "1"; oId "CUFF.100945.3"; tss\_id "TSS70603";  
chrX Cufflinks exon 39866417 39869054 . + . gene\_id "XLOC\_056303"; transcript\_id "TCONS\_00092708";  
exon\_number "2"; oId "CUFF.100945.3"; tss\_id "TSS70603";  
chrX Cufflinks exon 39869271 39874916 . + . gene\_id "XLOC\_056303"; transcript\_id "TCONS\_00092708";  
exon\_number "3"; oId "CUFF.100945.3"; tss\_id "TSS70603";  
chrX Cufflinks exon 39865471 39866131 . + . gene\_id "XLOC\_056303"; transcript\_id "TCONS\_00092707";  
exon\_number "1"; oId "CUFF.100945.2"; tss\_id "TSS70603";  
chrX Cufflinks exon 39866417 39874916 . + . gene\_id "XLOC\_056303"; transcript\_id "TCONS\_00092707";  
exon\_number "2"; oId "CUFF.100945.2"; tss\_id "TSS70603";  
chrX Cufflinks exon 46062564 46063184 . + . gene\_id "XLOC\_056330"; transcript\_id "TCONS\_00092767";  
exon\_number "1"; oId "CUFF.101068.2"; tss\_id "TSS70641";  
chrX Cufflinks exon 46067111 46067311 . + . gene\_id "XLOC\_056330"; transcript\_id "TCONS\_00092767";  
exon\_number "2"; oId "CUFF.101068.2"; tss\_id "TSS70641";  
chrX Cufflinks exon 46062564 46063187 . + . gene\_id "XLOC\_056330"; transcript\_id "TCONS\_00092766";  
exon\_number "1"; oId "CUFF.101068.1"; tss\_id "TSS70641";  
chrX Cufflinks exon 46067111 46067311 . + . gene\_id "XLOC\_056330"; transcript\_id "TCONS\_00092766";  
exon\_number "2"; oId "CUFF.101068.1"; tss\_id "TSS70641";  
chrX Cufflinks exon 46404925 46405062 . + . gene\_id "XLOC\_056335"; transcript\_id "TCONS\_00092777";  
exon\_number "1"; oId "CUFF.101099.1"; tss\_id "TSS70646";  
chrX Cufflinks exon 46405901 46407910 . + . gene\_id "XLOC\_056335"; transcript\_id "TCONS\_00092777";  
exon\_number "2"; oId "CUFF.101099.1"; tss\_id "TSS70646";  
chrX Cufflinks exon 54210484 54212522 . + . gene\_id "XLOC\_056416"; transcript\_id "TCONS\_00092944";  
exon\_number "1"; oId "CUFF.101422.2"; tss\_id "TSS70756";  
chrX Cufflinks exon 54224760 54225138 . + . gene\_id "XLOC\_056416"; transcript\_id "TCONS\_00092944";  
exon\_number "2"; oId "CUFF.101422.2"; tss\_id "TSS70756";

chrX Cufflinks exon 56755481 56756022 . + . gene\_id "XLOC\_056446"; transcript\_id "TCONS\_00093004";  
exon\_number "1"; oId "CUFF.101531.1"; tss\_id "TSS70795";

chrX Cufflinks exon 56758496 56758632 . + . gene\_id "XLOC\_056446"; transcript\_id "TCONS\_00093004";  
exon\_number "2"; oId "CUFF.101531.1"; tss\_id "TSS70795";

chrX Cufflinks exon 56843753 56844004 . + . gene\_id "XLOC\_056446"; transcript\_id "TCONS\_00093004";  
exon\_number "3"; oId "CUFF.101531.1"; tss\_id "TSS70795";

chrX Cufflinks exon 56755513 56756022 . + . gene\_id "XLOC\_056446"; transcript\_id "TCONS\_00093005";  
exon\_number "1"; oId "CUFF.101531.2"; tss\_id "TSS70795";

chrX Cufflinks exon 56758496 56758632 . + . gene\_id "XLOC\_056446"; transcript\_id "TCONS\_00093005";  
exon\_number "2"; oId "CUFF.101531.2"; tss\_id "TSS70795";

chrX Cufflinks exon 56813507 56813594 . + . gene\_id "XLOC\_056446"; transcript\_id "TCONS\_00093005";  
exon\_number "3"; oId "CUFF.101531.2"; tss\_id "TSS70795";

chrX Cufflinks exon 63800183 63800212 . + . gene\_id "XLOC\_056463"; transcript\_id "TCONS\_00093031";  
exon\_number "1"; oId "CUFF.101698.3"; tss\_id "TSS70816";

chrX Cufflinks exon 63800648 63800851 . + . gene\_id "XLOC\_056463"; transcript\_id "TCONS\_00093031";  
exon\_number "2"; oId "CUFF.101698.3"; tss\_id "TSS70816";

chrX Cufflinks exon 63800980 63801072 . + . gene\_id "XLOC\_056463"; transcript\_id "TCONS\_00093031";  
exon\_number "3"; oId "CUFF.101698.3"; tss\_id "TSS70816";

chrX Cufflinks exon 63806076 63806387 . + . gene\_id "XLOC\_056463"; transcript\_id "TCONS\_00093031";  
exon\_number "4"; oId "CUFF.101698.3"; tss\_id "TSS70816";

chrX Cufflinks exon 63800375 63800413 . + . gene\_id "XLOC\_056463"; transcript\_id "TCONS\_00093032";  
exon\_number "1"; oId "CUFF.101698.5"; tss\_id "TSS70817";

chrXCufflinks exon63800648 63800851 . + . gene\_id "XLOC\_056463"; transcript\_id "TCONS\_00093032"; exon\_number "2";  
oId "CUFF.101698.5"; tss\_id "TSS70817";

chrXCufflinks exon63800980 63801072 . + . gene\_id "XLOC\_056463"; transcript\_id "TCONS\_00093032"; exon\_number "3";  
oId "CUFF.101698.5"; tss\_id "TSS70817";

chrXCufflinks exon63806076 63806387 . + . gene\_id "XLOC\_056463"; transcript\_id "TCONS\_00093032"; exon\_number "4";  
oId "CUFF.101698.5"; tss\_id "TSS70817";

chrXCufflinks exon64808049 64808492 . + . gene\_id "XLOC\_056482"; transcript\_id "TCONS\_00093055"; exon\_number "1";  
oId "CUFF.101923.2"; tss\_id "TSS70838";

chrXCufflinks exon64808766 64808948 . + . gene\_id "XLOC\_056482"; transcript\_id "TCONS\_00093055"; exon\_number "2";  
oId "CUFF.101923.2"; tss\_id "TSS70838";

chrXCufflinks exon64813133 64813305 . + . gene\_id "XLOC\_056482"; transcript\_id "TCONS\_00093055"; exon\_number "3";  
oId "CUFF.101923.2"; tss\_id "TSS70838";

chrXCufflinks exon64808049 64808492 . + . gene\_id "XLOC\_056482"; transcript\_id "TCONS\_00093054"; exon\_number "1";  
oId "CUFF.101923.1"; tss\_id "TSS70838";

chrXCufflinks exon64813133 64813305 . + . gene\_id "XLOC\_056482"; transcript\_id "TCONS\_00093054"; exon\_number "2";  
oId "CUFF.101923.1"; tss\_id "TSS70838";

chrXCufflinks exon65235205 65235393 . + . gene\_id "XLOC\_056488"; transcript\_id "TCONS\_00093062"; exon\_number "1";  
oId "CUFF.101946.2"; tss\_id "TSS70844";

chrXCufflinks exon65238666 65244465 . + . gene\_id "XLOC\_056488"; transcript\_id "TCONS\_00093062"; exon\_number "2";  
oId "CUFF.101946.2"; tss\_id "TSS70844";

chrXCufflinks exon65235216 65235394 . + . gene\_id "XLOC\_056488"; transcript\_id "TCONS\_00093063"; exon\_number "1";

|                                                                                |   |   |   |                                                                         |
|--------------------------------------------------------------------------------|---|---|---|-------------------------------------------------------------------------|
| oId "CUFF.101946.3"; tss_id "TSS70844";<br>chrXCufflinks exon65238666 65244465 | . | + | . | gene_id "XLOC_056488"; transcript_id "TCONS_00093063"; exon_number "2"; |
| oId "CUFF.101946.3"; tss_id "TSS70844";<br>chrXCufflinks exon65235221 65235393 | . | + | . | gene_id "XLOC_056488"; transcript_id "TCONS_00093065"; exon_number "1"; |
| oId "CUFF.101946.5"; tss_id "TSS70844";<br>chrXCufflinks exon65236907 65237031 | . | + | . | gene_id "XLOC_056488"; transcript_id "TCONS_00093065"; exon_number "2"; |
| oId "CUFF.101946.5"; tss_id "TSS70844";<br>chrXCufflinks exon65238666 65244465 | . | + | . | gene_id "XLOC_056488"; transcript_id "TCONS_00093065"; exon_number "3"; |
| oId "CUFF.101946.5"; tss_id "TSS70844";<br>chrXCufflinks exon65235221 65235393 | . | + | . | gene_id "XLOC_056488"; transcript_id "TCONS_00093064"; exon_number "1"; |
| oId "CUFF.101946.4"; tss_id "TSS70844";<br>chrXCufflinks exon65236907 65244465 | . | + | . | gene_id "XLOC_056488"; transcript_id "TCONS_00093064"; exon_number "2"; |
| oId "CUFF.101946.4"; tss_id "TSS70844";<br>chrXCufflinks exon65235295 65237221 | . | + | . | gene_id "XLOC_056488"; transcript_id "TCONS_00093066"; exon_number "1"; |
| oId "CUFF.101946.6"; tss_id "TSS70844";<br>chrXCufflinks exon65238666 65244465 | . | + | . | gene_id "XLOC_056488"; transcript_id "TCONS_00093066"; exon_number "2"; |
| oId "CUFF.101946.6"; tss_id "TSS70844";<br>chrXCufflinks exon66620927 66620941 | . | + | . | gene_id "XLOC_056490"; transcript_id "TCONS_00093070"; exon_number "1"; |
| oId "CUFF.101954.1"; tss_id "TSS70847";<br>chrXCufflinks exon66790657 66791024 | . | + | . | gene_id "XLOC_056490"; transcript_id "TCONS_00093070"; exon_number "2"; |
| oId "CUFF.101954.1"; tss_id "TSS70847";<br>chrXCufflinks exon70139828 70139856 | . | + | . | gene_id "XLOC_056514"; transcript_id "TCONS_00093102"; exon_number "1"; |
| oId "CUFF.102018.1"; tss_id "TSS70876";<br>chrXCufflinks exon70182857 70183212 | . | + | . | gene_id "XLOC_056514"; transcript_id "TCONS_00093102"; exon_number "2"; |
| oId "CUFF.102018.1"; tss_id "TSS70876";<br>chrXCufflinks exon70323678 70323975 | . | + | . | gene_id "XLOC_056516"; transcript_id "TCONS_00093104"; exon_number "1"; |
| oId "CUFF.102037.1"; tss_id "TSS70878";<br>chrXCufflinks exon70324229 70325043 | . | + | . | gene_id "XLOC_056516"; transcript_id "TCONS_00093104"; exon_number "2"; |
| oId "CUFF.102037.1"; tss_id "TSS70878";<br>chrXCufflinks exon70567533 70568519 | . | + | . | gene_id "XLOC_056528"; transcript_id "TCONS_00093121"; exon_number "1"; |
| oId "CUFF.102092.2"; tss_id "TSS70890";<br>chrXCufflinks exon70569976 70570093 | . | + | . | gene_id "XLOC_056528"; transcript_id "TCONS_00093121"; exon_number "2"; |
| oId "CUFF.102092.2"; tss_id "TSS70890";<br>chrXCufflinks exon70571692 70572075 | . | + | . | gene_id "XLOC_056528"; transcript_id "TCONS_00093121"; exon_number "3"; |
| oId "CUFF.102092.2"; tss_id "TSS70890";<br>chrXCufflinks exon70572253 70576764 | . | + | . | gene_id "XLOC_056528"; transcript_id "TCONS_00093121"; exon_number "4"; |
| oId "CUFF.102092.2"; tss_id "TSS70890";<br>chrXCufflinks exon70571992 70572075 | . | + | . | gene_id "XLOC_056528"; transcript_id "TCONS_00093123"; exon_number "1"; |
| oId "CUFF.102092.4"; tss_id "TSS70891";<br>chrXCufflinks exon70572253 70572769 | . | + | . | gene_id "XLOC_056528"; transcript_id "TCONS_00093123"; exon_number "2"; |
| oId "CUFF.102092.4"; tss_id "TSS70891";<br>chrXCufflinks exon70581255 70581506 | . | + | . | gene_id "XLOC_056528"; transcript_id "TCONS_00093123"; exon_number "3"; |
| oId "CUFF.102092.4"; tss_id "TSS70891";                                        |   |   |   |                                                                         |



|                                         |          |   |   |   |                                                                         |
|-----------------------------------------|----------|---|---|---|-------------------------------------------------------------------------|
| chrXCufflinks exon73164159              | 73164300 | . | + | . | gene_id "XLOC_056562"; transcript_id "TCONS_00093179"; exon_number "1"; |
| oId "CUFF.102172.6"; tss_id "TSS70933"; |          |   |   |   |                                                                         |
| chrXCufflinks exon73164419              | 73164497 | . | + | . | gene_id "XLOC_056562"; transcript_id "TCONS_00093179"; exon_number "2"; |
| oId "CUFF.102172.6"; tss_id "TSS70933"; |          |   |   |   |                                                                         |
| chrXCufflinks exon73166834              | 73167209 | . | + | . | gene_id "XLOC_056562"; transcript_id "TCONS_00093179"; exon_number "3"; |
| oId "CUFF.102172.6"; tss_id "TSS70933"; |          |   |   |   |                                                                         |
| chrXCufflinks exon73182570              | 73182608 | . | + | . | gene_id "XLOC_056562"; transcript_id "TCONS_00093179"; exon_number "4"; |
| oId "CUFF.102172.6"; tss_id "TSS70933"; |          |   |   |   |                                                                         |
| chrXCufflinks exon73164159              | 73164300 | . | + | . | gene_id "XLOC_056562"; transcript_id "TCONS_00093178"; exon_number "1"; |
| oId "CUFF.102172.3"; tss_id "TSS70933"; |          |   |   |   |                                                                         |
| chrXCufflinks exon73164419              | 73164497 | . | + | . | gene_id "XLOC_056562"; transcript_id "TCONS_00093178"; exon_number "2"; |
| oId "CUFF.102172.3"; tss_id "TSS70933"; |          |   |   |   |                                                                         |
| chrXCufflinks exon73166834              | 73167209 | . | + | . | gene_id "XLOC_056562"; transcript_id "TCONS_00093178"; exon_number "3"; |
| oId "CUFF.102172.3"; tss_id "TSS70933"; |          |   |   |   |                                                                         |
| chrXCufflinks exon73182566              | 73182608 | . | + | . | gene_id "XLOC_056562"; transcript_id "TCONS_00093178"; exon_number "4"; |
| oId "CUFF.102172.3"; tss_id "TSS70933"; |          |   |   |   |                                                                         |
| chrXCufflinks exon73164159              | 73164300 | . | + | . | gene_id "XLOC_056562"; transcript_id "TCONS_00093180"; exon_number "1"; |
| oId "CUFF.102172.4"; tss_id "TSS70933"; |          |   |   |   |                                                                         |
| chrXCufflinks exon73164419              | 73164497 | . | + | . | gene_id "XLOC_056562"; transcript_id "TCONS_00093180"; exon_number "2"; |
| oId "CUFF.102172.4"; tss_id "TSS70933"; |          |   |   |   |                                                                         |
| chrXCufflinks exon73214675              | 73214796 | . | + | . | gene_id "XLOC_056562"; transcript_id "TCONS_00093180"; exon_number "3"; |
| oId "CUFF.102172.4"; tss_id "TSS70933"; |          |   |   |   |                                                                         |
| chrXCufflinks exon73281871              | 73281983 | . | + | . | gene_id "XLOC_056562"; transcript_id "TCONS_00093180"; exon_number "4"; |
| oId "CUFF.102172.4"; tss_id "TSS70933"; |          |   |   |   |                                                                         |
| chrXCufflinks exon73289004              | 73290217 | . | + | . | gene_id "XLOC_056562"; transcript_id "TCONS_00093180"; exon_number "5"; |
| oId "CUFF.102172.4"; tss_id "TSS70933"; |          |   |   |   |                                                                         |
| chrXCufflinks exon74824777              | 74824857 | . | + | . | gene_id "XLOC_056578"; transcript_id "TCONS_00093199"; exon_number "1"; |
| oId "CUFF.102347.3"; tss_id "TSS70949"; |          |   |   |   |                                                                         |
| chrXCufflinks exon74831684              | 74831819 | . | + | . | gene_id "XLOC_056578"; transcript_id "TCONS_00093199"; exon_number "2"; |
| oId "CUFF.102347.3"; tss_id "TSS70949"; |          |   |   |   |                                                                         |
| chrXCufflinks exon74844536              | 74844723 | . | + | . | gene_id "XLOC_056578"; transcript_id "TCONS_00093199"; exon_number "3"; |
| oId "CUFF.102347.3"; tss_id "TSS70949"; |          |   |   |   |                                                                         |
| chrXCufflinks exon74845015              | 74845411 | . | + | . | gene_id "XLOC_056578"; transcript_id "TCONS_00093199"; exon_number "4"; |
| oId "CUFF.102347.3"; tss_id "TSS70949"; |          |   |   |   |                                                                         |
| chrXCufflinks exon74824777              | 74824857 | . | + | . | gene_id "XLOC_056578"; transcript_id "TCONS_00093201"; exon_number "1"; |
| oId "CUFF.102347.2"; tss_id "TSS70949"; |          |   |   |   |                                                                         |
| chrXCufflinks exon74844536              | 74844723 | . | + | . | gene_id "XLOC_056578"; transcript_id "TCONS_00093201"; exon_number "2"; |
| oId "CUFF.102347.2"; tss_id "TSS70949"; |          |   |   |   |                                                                         |
| chrXCufflinks exon74875635              | 74875802 | . | + | . | gene_id "XLOC_056578"; transcript_id "TCONS_00093201"; exon_number "3"; |
| oId "CUFF.102347.2"; tss_id "TSS70949"; |          |   |   |   |                                                                         |
| chrXCufflinks exon74876437              | 74876736 | . | + | . | gene_id "XLOC_056578"; transcript_id "TCONS_00093201"; exon_number "4"; |
| oId "CUFF.102347.2"; tss_id "TSS70949"; |          |   |   |   |                                                                         |
| chrXCufflinks exon74824777              | 74824857 | . | + | . | gene_id "XLOC_056578"; transcript_id "TCONS_00093200"; exon_number "1"; |

|                                                                                  |   |   |   |                                                                         |
|----------------------------------------------------------------------------------|---|---|---|-------------------------------------------------------------------------|
| oId "CUFF.102347.1"; tss_id "TSS70949";<br>chrXCufflinks exon74844536 74844723   | . | + | . | gene_id "XLOC_056578"; transcript_id "TCONS_00093200"; exon_number "2"; |
| oId "CUFF.102347.1"; tss_id "TSS70949";<br>chrXCufflinks exon74876437 74876736   | . | + | . | gene_id "XLOC_056578"; transcript_id "TCONS_00093200"; exon_number "3"; |
| oId "CUFF.102347.1"; tss_id "TSS70949";<br>chrXCufflinks exon74824777 74824857   | . | + | . | gene_id "XLOC_056578"; transcript_id "TCONS_00093202"; exon_number "1"; |
| oId "CUFF.102347.4"; tss_id "TSS70949";<br>chrXCufflinks exon74831684 74831819   | . | + | . | gene_id "XLOC_056578"; transcript_id "TCONS_00093202"; exon_number "2"; |
| oId "CUFF.102347.4"; tss_id "TSS70949";<br>chrXCufflinks exon74844536 74844723   | . | + | . | gene_id "XLOC_056578"; transcript_id "TCONS_00093202"; exon_number "3"; |
| oId "CUFF.102347.4"; tss_id "TSS70949";<br>chrXCufflinks exon74887385 74887437   | . | + | . | gene_id "XLOC_056578"; transcript_id "TCONS_00093202"; exon_number "4"; |
| oId "CUFF.102347.4"; tss_id "TSS70949";<br>chrXCufflinks exon74824777 74824857   | . | + | . | gene_id "XLOC_056578"; transcript_id "TCONS_00093203"; exon_number "1"; |
| oId "CUFF.102347.5"; tss_id "TSS70949";<br>chrXCufflinks exon74831684 74831819   | . | + | . | gene_id "XLOC_056578"; transcript_id "TCONS_00093203"; exon_number "2"; |
| oId "CUFF.102347.5"; tss_id "TSS70949";<br>chrXCufflinks exon74844536 74844723   | . | + | . | gene_id "XLOC_056578"; transcript_id "TCONS_00093203"; exon_number "3"; |
| oId "CUFF.102347.5"; tss_id "TSS70949";<br>chrXCufflinks exon74888015 74888082   | . | + | . | gene_id "XLOC_056578"; transcript_id "TCONS_00093203"; exon_number "4"; |
| oId "CUFF.102347.5"; tss_id "TSS70949";<br>chrXCufflinks exon74888410 74888918   | . | + | . | gene_id "XLOC_056578"; transcript_id "TCONS_00093203"; exon_number "5"; |
| oId "CUFF.102347.5"; tss_id "TSS70949";<br>chrXCufflinks exon78625193 7862535    | . | + | . | gene_id "XLOC_056625"; transcript_id "TCONS_00093279"; exon_number "1"; |
| oId "CUFF.102512.1"; tss_id "TSS71004";<br>chrXCufflinks exon78653331 78655218   | . | + | . | gene_id "XLOC_056625"; transcript_id "TCONS_00093279"; exon_number "2"; |
| oId "CUFF.102512.1"; tss_id "TSS71004";<br>chrXCufflinks exon80065468 80066074   | . | + | . | gene_id "XLOC_056638"; transcript_id "TCONS_00093292"; exon_number "1"; |
| oId "CUFF.102554.1"; tss_id "TSS71017";<br>chrXCufflinks exon80067610 80068647   | . | + | . | gene_id "XLOC_056638"; transcript_id "TCONS_00093292"; exon_number "2"; |
| oId "CUFF.102554.1"; tss_id "TSS71017";<br>chrXCufflinks exon102023950 102024269 | . | + | . | gene_id "XLOC_056692"; transcript_id "TCONS_00093390"; exon_number "1"; |
| oId "CUFF.102810.1"; tss_id "TSS71082";<br>chrXCufflinks exon102025280 102025348 | . | + | . | gene_id "XLOC_056692"; transcript_id "TCONS_00093390"; exon_number "2"; |
| oId "CUFF.102810.1"; tss_id "TSS71082";<br>chrXCufflinks exon102071920 102072010 | . | + | . | gene_id "XLOC_056692"; transcript_id "TCONS_00093390"; exon_number "3"; |
| oId "CUFF.102810.1"; tss_id "TSS71082";<br>chrXCufflinks exon102080921 102081097 | . | + | . | gene_id "XLOC_056692"; transcript_id "TCONS_00093390"; exon_number "4"; |
| oId "CUFF.102810.1"; tss_id "TSS71082";<br>chrXCufflinks exon102081897 102082072 | . | + | . | gene_id "XLOC_056692"; transcript_id "TCONS_00093390"; exon_number "5"; |
| oId "CUFF.102810.1"; tss_id "TSS71082";<br>chrXCufflinks exon102094729 102094900 | . | + | . | gene_id "XLOC_056692"; transcript_id "TCONS_00093390"; exon_number "6"; |
| oId "CUFF.102810.1"; tss_id "TSS71082";                                          | . |   |   |                                                                         |

|                                         |           |   |   |   |                                                                          |
|-----------------------------------------|-----------|---|---|---|--------------------------------------------------------------------------|
| chrXCufflinks exon102100785             | 102100948 | . | + | . | gene_id "XLOC_056692"; transcript_id "TCONS_00093390"; exon_number "7";  |
| oId "CUFF.102810.1"; tss_id "TSS71082"; |           |   |   |   |                                                                          |
| chrXCufflinks exon102119970             | 102120080 | . | + | . | gene_id "XLOC_056692"; transcript_id "TCONS_00093390"; exon_number "8";  |
| oId "CUFF.102810.1"; tss_id "TSS71082"; |           |   |   |   |                                                                          |
| chrXCufflinks exon102139071             | 102139736 | . | + | . | gene_id "XLOC_056692"; transcript_id "TCONS_00093390"; exon_number "9";  |
| oId "CUFF.102810.1"; tss_id "TSS71082"; |           |   |   |   |                                                                          |
| chrXCufflinks exon102152502             | 102152692 | . | + | . | gene_id "XLOC_056692"; transcript_id "TCONS_00093390"; exon_number "10"; |
| oId "CUFF.102810.1"; tss_id "TSS71082"; |           |   |   |   |                                                                          |
| chrXCufflinks exon102155678             | 102155760 | . | + | . | gene_id "XLOC_056692"; transcript_id "TCONS_00093390"; exon_number "11"; |
| oId "CUFF.102810.1"; tss_id "TSS71082"; |           |   |   |   |                                                                          |
| chrXCufflinks exon102155951             | 102156061 | . | + | . | gene_id "XLOC_056692"; transcript_id "TCONS_00093390"; exon_number "12"; |
| oId "CUFF.102810.1"; tss_id "TSS71082"; |           |   |   |   |                                                                          |
| chrXCufflinks exon102156559             | 102156699 | . | + | . | gene_id "XLOC_056692"; transcript_id "TCONS_00093390"; exon_number "13"; |
| oId "CUFF.102810.1"; tss_id "TSS71082"; |           |   |   |   |                                                                          |
| chrXCufflinks exon102160589             | 102160665 | . | + | . | gene_id "XLOC_056692"; transcript_id "TCONS_00093390"; exon_number "14"; |
| oId "CUFF.102810.1"; tss_id "TSS71082"; |           |   |   |   |                                                                          |
| chrXCufflinks exon102213576             | 102213629 | . | + | . | gene_id "XLOC_056692"; transcript_id "TCONS_00093390"; exon_number "15"; |
| oId "CUFF.102810.1"; tss_id "TSS71082"; |           |   |   |   |                                                                          |
| chrXCufflinks exon102216534             | 102219408 | . | + | . | gene_id "XLOC_056692"; transcript_id "TCONS_00093390"; exon_number "16"; |
| oId "CUFF.102810.1"; tss_id "TSS71082"; |           |   |   |   |                                                                          |
| chrXCufflinks exon102024095             | 102024269 | . | + | . | gene_id "XLOC_056692"; transcript_id "TCONS_00093391"; exon_number "1";  |
| oId "CUFF.102810.3"; tss_id "TSS71083"; |           |   |   |   |                                                                          |
| chrXCufflinks exon102025280             | 102025348 | . | + | . | gene_id "XLOC_056692"; transcript_id "TCONS_00093391"; exon_number "2";  |
| oId "CUFF.102810.3"; tss_id "TSS71083"; |           |   |   |   |                                                                          |
| chrXCufflinks exon102071920             | 102072010 | . | + | . | gene_id "XLOC_056692"; transcript_id "TCONS_00093391"; exon_number "3";  |
| oId "CUFF.102810.3"; tss_id "TSS71083"; |           |   |   |   |                                                                          |
| chrXCufflinks exon102081897             | 102082072 | . | + | . | gene_id "XLOC_056692"; transcript_id "TCONS_00093391"; exon_number "4";  |
| oId "CUFF.102810.3"; tss_id "TSS71083"; |           |   |   |   |                                                                          |
| chrXCufflinks exon102094729             | 102094791 | . | + | . | gene_id "XLOC_056692"; transcript_id "TCONS_00093391"; exon_number "5";  |
| oId "CUFF.102810.3"; tss_id "TSS71083"; |           |   |   |   |                                                                          |
| chrXCufflinks exon102100785             | 102100948 | . | + | . | gene_id "XLOC_056692"; transcript_id "TCONS_00093391"; exon_number "6";  |
| oId "CUFF.102810.3"; tss_id "TSS71083"; |           |   |   |   |                                                                          |
| chrXCufflinks exon102119970             | 102120080 | . | + | . | gene_id "XLOC_056692"; transcript_id "TCONS_00093391"; exon_number "7";  |
| oId "CUFF.102810.3"; tss_id "TSS71083"; |           |   |   |   |                                                                          |
| chrXCufflinks exon102139071             | 102140338 | . | + | . | gene_id "XLOC_056692"; transcript_id "TCONS_00093391"; exon_number "8";  |
| oId "CUFF.102810.3"; tss_id "TSS71083"; |           |   |   |   |                                                                          |
| chrXCufflinks exon110754890             | 110755062 | . | + | . | gene_id "XLOC_056767"; transcript_id "TCONS_00093500"; exon_number "1";  |
| oId "CUFF.103086.1"; tss_id "TSS71168"; |           |   |   |   |                                                                          |
| chrXCufflinks exon110755226             | 110755322 | . | + | . | gene_id "XLOC_056767"; transcript_id "TCONS_00093500"; exon_number "2";  |
| oId "CUFF.103086.1"; tss_id "TSS71168"; |           |   |   |   |                                                                          |
| chrXCufflinks exon110761303             | 110765627 | . | + | . | gene_id "XLOC_056767"; transcript_id "TCONS_00093500"; exon_number "3";  |
| oId "CUFF.103086.1"; tss_id "TSS71168"; |           |   |   |   |                                                                          |
| chrXCufflinks exon125447915             | 125447926 | . | + | . | gene_id "XLOC_056836"; transcript_id "TCONS_00093605"; exon_number "1";  |

oId "CUFF.103384.1"; tss\_id "TSS71248";  
chrXCufflinks exon125606771 125607290 . + . gene\_id "XLOC\_056836"; transcript\_id "TCONS\_00093605"; exon\_number "2";  
oId "CUFF.103384.1"; tss\_id "TSS71248";  
chrXCufflinks exon133321038 133321180 . + . gene\_id "XLOC\_056879"; transcript\_id "TCONS\_00093665"; exon\_number "1";  
oId "CUFF.103550.1"; tss\_id "TSS71298";  
chrXCufflinks exon133322442 133322620 . + . gene\_id "XLOC\_056879"; transcript\_id "TCONS\_00093665"; exon\_number "2";  
oId "CUFF.103550.1"; tss\_id "TSS71298";  
chrXCufflinks exon133322991 133323088 . + . gene\_id "XLOC\_056879"; transcript\_id "TCONS\_00093665"; exon\_number "3";  
oId "CUFF.103550.1"; tss\_id "TSS71298";  
chrXCufflinks exon133346444 133346565 . + . gene\_id "XLOC\_056879"; transcript\_id "TCONS\_00093665"; exon\_number "4";  
oId "CUFF.103550.1"; tss\_id "TSS71298";  
chrXCufflinks exon133321044 133321180 . + . gene\_id "XLOC\_056879"; transcript\_id "TCONS\_00093666"; exon\_number "1";  
oId "CUFF.103550.2"; tss\_id "TSS71298";  
chrXCufflinks exon133321613 133322127 . + . gene\_id "XLOC\_056879"; transcript\_id "TCONS\_00093666"; exon\_number "2";  
oId "CUFF.103550.2"; tss\_id "TSS71298";  
chrXCufflinks exon135721702 135721963 . + . gene\_id "XLOC\_056913"; transcript\_id "TCONS\_00093715"; exon\_number "1";  
oId "CUFF.103672.2"; tss\_id "TSS71336";  
chrXCufflinks exon135722933 135723032 . + . gene\_id "XLOC\_056913"; transcript\_id "TCONS\_00093715"; exon\_number "2";  
oId "CUFF.103672.2"; tss\_id "TSS71336";  
chrXCufflinks exon135724262 135724588 . + . gene\_id "XLOC\_056913"; transcript\_id "TCONS\_00093715"; exon\_number "3";  
oId "CUFF.103672.2"; tss\_id "TSS71336";  
chrXCufflinks exon135721702 135721963 . + . gene\_id "XLOC\_056913"; transcript\_id "TCONS\_00093714"; exon\_number "1";  
oId "CUFF.103672.1"; tss\_id "TSS71336";  
chrXCufflinks exon135722933 135722999 . + . gene\_id "XLOC\_056913"; transcript\_id "TCONS\_00093714"; exon\_number "2";  
oId "CUFF.103672.1"; tss\_id "TSS71336";  
chrXCufflinks exon135724262 135724588 . + . gene\_id "XLOC\_056913"; transcript\_id "TCONS\_00093714"; exon\_number "3";  
oId "CUFF.103672.1"; tss\_id "TSS71336";  
chrXCufflinks exon135991535 135991939 . + . gene\_id "XLOC\_056917"; transcript\_id "TCONS\_00093719"; exon\_number "1";  
oId "CUFF.103703.1"; tss\_id "TSS71340";  
chrXCufflinks exon136004624 136004935 . + . gene\_id "XLOC\_056917"; transcript\_id "TCONS\_00093719"; exon\_number "2";  
oId "CUFF.103703.1"; tss\_id "TSS71340";  
chrXCufflinks exon136007406 136007538 . + . gene\_id "XLOC\_056917"; transcript\_id "TCONS\_00093719"; exon\_number "3";  
oId "CUFF.103703.1"; tss\_id "TSS71340";  
chrXCufflinks exon136103571 136104300 . + . gene\_id "XLOC\_056917"; transcript\_id "TCONS\_00093719"; exon\_number "4";  
oId "CUFF.103703.1"; tss\_id "TSS71340";  
chrXCufflinks exon6516714 6516777 . - . gene\_id "XLOC\_057087"; transcript\_id "TCONS\_00093990"; exon\_number "1"; oId  
"CUFF.100306.1"; tss\_id "TSS71556";  
chrXCufflinks exon6530441 6531612 . - . gene\_id "XLOC\_057087"; transcript\_id "TCONS\_00093990"; exon\_number "2"; oId  
"CUFF.100306.1"; tss\_id "TSS71556";  
chrXCufflinks exon6532049 6532917 . - . gene\_id "XLOC\_057087"; transcript\_id "TCONS\_00093990"; exon\_number "3"; oId  
"CUFF.100306.1"; tss\_id "TSS71556";  
chrXCufflinks exon6624398 6624507 . - . gene\_id "XLOC\_057087"; transcript\_id "TCONS\_00093990"; exon\_number "4"; oId  
"CUFF.100306.1"; tss\_id "TSS71556";

chrXCufflinks exon6685548 6685752 . - . gene\_id "XLOC\_057087"; transcript\_id "TCONS\_00093990"; exon\_number "5"; oId  
"CUFF.100306.1"; tss\_id "TSS71556";  
chrXCufflinks exon6701362 6701543 . - . gene\_id "XLOC\_057087"; transcript\_id "TCONS\_00093990"; exon\_number "6"; oId  
"CUFF.100306.1"; tss\_id "TSS71556";  
chrXCufflinks exon6819500 6819578 . - . gene\_id "XLOC\_057087"; transcript\_id "TCONS\_00093990"; exon\_number "7"; oId  
"CUFF.100306.1"; tss\_id "TSS71556";  
chrXCufflinks exon6522942 6523053 . - . gene\_id "XLOC\_057087"; transcript\_id "TCONS\_00093991"; exon\_number "1"; oId  
"CUFF.100306.3"; tss\_id "TSS71556";  
chrXCufflinks exon6530440 6532917 . - . gene\_id "XLOC\_057087"; transcript\_id "TCONS\_00093991"; exon\_number "2"; oId  
"CUFF.100306.3"; tss\_id "TSS71556";  
chrXCufflinks exon6624398 6624507 . - . gene\_id "XLOC\_057087"; transcript\_id "TCONS\_00093991"; exon\_number "3"; oId  
"CUFF.100306.3"; tss\_id "TSS71556";  
chrXCufflinks exon6639458 6639585 . - . gene\_id "XLOC\_057087"; transcript\_id "TCONS\_00093991"; exon\_number "4"; oId  
"CUFF.100306.3"; tss\_id "TSS71556";  
chrXCufflinks exon6685548 6685752 . - . gene\_id "XLOC\_057087"; transcript\_id "TCONS\_00093991"; exon\_number "5"; oId  
"CUFF.100306.3"; tss\_id "TSS71556";  
chrXCufflinks exon6687394 6687709 . - . gene\_id "XLOC\_057087"; transcript\_id "TCONS\_00093991"; exon\_number "6"; oId  
"CUFF.100306.3"; tss\_id "TSS71556";  
chrXCufflinks exon6701362 6701543 . - . gene\_id "XLOC\_057087"; transcript\_id "TCONS\_00093991"; exon\_number "7"; oId  
"CUFF.100306.3"; tss\_id "TSS71556";  
chrXCufflinks exon6819500 6819578 . - . gene\_id "XLOC\_057087"; transcript\_id "TCONS\_00093991"; exon\_number "8"; oId  
"CUFF.100306.3"; tss\_id "TSS71556";  
chrXCufflinks exon6530294 6531612 . - . gene\_id "XLOC\_057087"; transcript\_id "TCONS\_00093994"; exon\_number "1"; oId  
"CUFF.100306.4"; tss\_id "TSS71557";  
chrXCufflinks exon6532049 6533955 . - . gene\_id "XLOC\_057087"; transcript\_id "TCONS\_00093994"; exon\_number "2"; oId  
"CUFF.100306.4"; tss\_id "TSS71557";  
chrXCufflinks exon6623131 6623770 . - . gene\_id "XLOC\_057087"; transcript\_id "TCONS\_00094010"; exon\_number "1"; oId  
"CUFF.100306.6"; tss\_id "TSS71556";  
chrXCufflinks exon6624384 6624507 . - . gene\_id "XLOC\_057087"; transcript\_id "TCONS\_00094010"; exon\_number "2"; oId  
"CUFF.100306.6"; tss\_id "TSS71556";  
chrXCufflinks exon6639458 6639585 . - . gene\_id "XLOC\_057087"; transcript\_id "TCONS\_00094010"; exon\_number "3"; oId  
"CUFF.100306.6"; tss\_id "TSS71556";  
chrXCufflinks exon6685548 6685752 . - . gene\_id "XLOC\_057087"; transcript\_id "TCONS\_00094010"; exon\_number "4"; oId  
"CUFF.100306.6"; tss\_id "TSS71556";  
chrXCufflinks exon6687394 6687709 . - . gene\_id "XLOC\_057087"; transcript\_id "TCONS\_00094010"; exon\_number "5"; oId  
"CUFF.100306.6"; tss\_id "TSS71556";  
chrXCufflinks exon6688663 6688776 . - . gene\_id "XLOC\_057087"; transcript\_id "TCONS\_00094010"; exon\_number "6"; oId  
"CUFF.100306.6"; tss\_id "TSS71556";  
chrXCufflinks exon6701362 6701543 . - . gene\_id "XLOC\_057087"; transcript\_id "TCONS\_00094010"; exon\_number "7"; oId  
"CUFF.100306.6"; tss\_id "TSS71556";  
chrXCufflinks exon6819500 6819578 . - . gene\_id "XLOC\_057087"; transcript\_id "TCONS\_00094010"; exon\_number "8"; oId  
"CUFF.100306.6"; tss\_id "TSS71556";  
chrXCufflinks exon6686774 6687243 . - . gene\_id "XLOC\_057087"; transcript\_id "TCONS\_00094013"; exon\_number "1"; oId

"CUFF.100306.7"; tss\_id "TSS71558";  
chrXCufflinks exon6687394 6687621 . - . gene\_id "XLOC\_057087"; transcript\_id "TCONS\_00094013"; exon\_number "2"; oId  
"CUFF.100306.7"; tss\_id "TSS71558";  
chrXCufflinks exon6688677 6688776 . - . gene\_id "XLOC\_057087"; transcript\_id "TCONS\_00094014"; exon\_number "1"; oId  
"CUFF.100306.8"; tss\_id "TSS71559";  
chrXCufflinks exon6701362 6701543 . - . gene\_id "XLOC\_057087"; transcript\_id "TCONS\_00094014"; exon\_number "2"; oId  
"CUFF.100306.8"; tss\_id "TSS71559";  
chrXCufflinks exon6895174 6895278 . - . gene\_id "XLOC\_057087"; transcript\_id "TCONS\_00094014"; exon\_number "3"; oId  
"CUFF.100306.8"; tss\_id "TSS71559";  
chrXCufflinks exon6896201 6896354 . - . gene\_id "XLOC\_057087"; transcript\_id "TCONS\_00094014"; exon\_number "4"; oId  
"CUFF.100306.8"; tss\_id "TSS71559";  
chrXCufflinks exon10865535 10866923 . - . gene\_id "XLOC\_057157"; transcript\_id "TCONS\_00094073"; exon\_number "1";  
oId "CUFF.100454.4"; tss\_id "TSS71634";  
chrXCufflinks exon11074056 11074157 . - . gene\_id "XLOC\_057157"; transcript\_id "TCONS\_00094073"; exon\_number "2";  
oId "CUFF.100454.4"; tss\_id "TSS71634";  
chrXCufflinks exon11125022 11125110 . - . gene\_id "XLOC\_057157"; transcript\_id "TCONS\_00094073"; exon\_number "3";  
oId "CUFF.100454.4"; tss\_id "TSS71634";  
chrXCufflinks exon11129003 11129101 . - . gene\_id "XLOC\_057157"; transcript\_id "TCONS\_00094073"; exon\_number "4";  
oId "CUFF.100454.4"; tss\_id "TSS71634";  
chrXCufflinks exon11129185 11129240 . - . gene\_id "XLOC\_057157"; transcript\_id "TCONS\_00094073"; exon\_number "5";  
oId "CUFF.100454.4"; tss\_id "TSS71634";  
chrXCufflinks exon10865535 10866923 . - . gene\_id "XLOC\_057157"; transcript\_id "TCONS\_00094072"; exon\_number "1";  
oId "CUFF.100454.3"; tss\_id "TSS71634";  
chrXCufflinks exon11056723 11056775 . - . gene\_id "XLOC\_057157"; transcript\_id "TCONS\_00094072"; exon\_number "2";  
oId "CUFF.100454.3"; tss\_id "TSS71634";  
chrXCufflinks exon11074056 11074156 . - . gene\_id "XLOC\_057157"; transcript\_id "TCONS\_00094072"; exon\_number "3";  
oId "CUFF.100454.3"; tss\_id "TSS71634";  
chrXCufflinks exon11125021 11125110 . - . gene\_id "XLOC\_057157"; transcript\_id "TCONS\_00094072"; exon\_number "4";  
oId "CUFF.100454.3"; tss\_id "TSS71634";  
chrXCufflinks exon11129003 11129101 . - . gene\_id "XLOC\_057157"; transcript\_id "TCONS\_00094072"; exon\_number "5";  
oId "CUFF.100454.3"; tss\_id "TSS71634";  
chrXCufflinks exon11129185 11129240 . - . gene\_id "XLOC\_057157"; transcript\_id "TCONS\_00094072"; exon\_number "6";  
oId "CUFF.100454.3"; tss\_id "TSS71634";  
chrXCufflinks exon10865535 10866923 . - . gene\_id "XLOC\_057157"; transcript\_id "TCONS\_00094074"; exon\_number "1";  
oId "CUFF.100454.1"; tss\_id "TSS71634";  
chrXCufflinks exon10878163 10878466 . - . gene\_id "XLOC\_057157"; transcript\_id "TCONS\_00094074"; exon\_number "2";  
oId "CUFF.100454.1"; tss\_id "TSS71634";  
chrXCufflinks exon11074056 11074156 . - . gene\_id "XLOC\_057157"; transcript\_id "TCONS\_00094074"; exon\_number "3";  
oId "CUFF.100454.1"; tss\_id "TSS71634";  
chrXCufflinks exon11125021 11125110 . - . gene\_id "XLOC\_057157"; transcript\_id "TCONS\_00094074"; exon\_number "4";  
oId "CUFF.100454.1"; tss\_id "TSS71634";  
chrXCufflinks exon11129003 11129246 . - . gene\_id "XLOC\_057157"; transcript\_id "TCONS\_00094074"; exon\_number "5";  
oId "CUFF.100454.1"; tss\_id "TSS71634";

|                                         |          |   |   |   |                                                                         |
|-----------------------------------------|----------|---|---|---|-------------------------------------------------------------------------|
| chrXCufflinks exon10865535              | 10866923 | . | - | . | gene_id "XLOC_057157"; transcript_id "TCONS_00094076"; exon_number "1"; |
| oId "CUFF.100454.6"; tss_id "TSS71634"; |          |   |   |   |                                                                         |
| chrXCufflinks exon10878163              | 10878466 | . | - | . | gene_id "XLOC_057157"; transcript_id "TCONS_00094076"; exon_number "2"; |
| oId "CUFF.100454.6"; tss_id "TSS71634"; |          |   |   |   |                                                                         |
| chrXCufflinks exon11074056              | 11074157 | . | - | . | gene_id "XLOC_057157"; transcript_id "TCONS_00094076"; exon_number "3"; |
| oId "CUFF.100454.6"; tss_id "TSS71634"; |          |   |   |   |                                                                         |
| chrXCufflinks exon11125022              | 11125110 | . | - | . | gene_id "XLOC_057157"; transcript_id "TCONS_00094076"; exon_number "4"; |
| oId "CUFF.100454.6"; tss_id "TSS71634"; |          |   |   |   |                                                                         |
| chrXCufflinks exon11129003              | 11129329 | . | - | . | gene_id "XLOC_057157"; transcript_id "TCONS_00094076"; exon_number "5"; |
| oId "CUFF.100454.6"; tss_id "TSS71634"; |          |   |   |   |                                                                         |
| chrXCufflinks exon10865535              | 10866923 | . | - | . | gene_id "XLOC_057157"; transcript_id "TCONS_00094075"; exon_number "1"; |
| oId "CUFF.100454.2"; tss_id "TSS71634"; |          |   |   |   |                                                                         |
| chrXCufflinks exon11074056              | 11074156 | . | - | . | gene_id "XLOC_057157"; transcript_id "TCONS_00094075"; exon_number "2"; |
| oId "CUFF.100454.2"; tss_id "TSS71634"; |          |   |   |   |                                                                         |
| chrXCufflinks exon11125021              | 11125110 | . | - | . | gene_id "XLOC_057157"; transcript_id "TCONS_00094075"; exon_number "3"; |
| oId "CUFF.100454.2"; tss_id "TSS71634"; |          |   |   |   |                                                                         |
| chrXCufflinks exon11129003              | 11129329 | . | - | . | gene_id "XLOC_057157"; transcript_id "TCONS_00094075"; exon_number "4"; |
| oId "CUFF.100454.2"; tss_id "TSS71634"; |          |   |   |   |                                                                         |
| chrXCufflinks exon10865535              | 10866923 | . | - | . | gene_id "XLOC_057157"; transcript_id "TCONS_00094077"; exon_number "1"; |
| oId "CUFF.100454.5"; tss_id "TSS71634"; |          |   |   |   |                                                                         |
| chrXCufflinks exon11074056              | 11074163 | . | - | . | gene_id "XLOC_057157"; transcript_id "TCONS_00094077"; exon_number "2"; |
| oId "CUFF.100454.5"; tss_id "TSS71634"; |          |   |   |   |                                                                         |
| chrXCufflinks exon11125023              | 11125110 | . | - | . | gene_id "XLOC_057157"; transcript_id "TCONS_00094077"; exon_number "3"; |
| oId "CUFF.100454.5"; tss_id "TSS71634"; |          |   |   |   |                                                                         |
| chrXCufflinks exon11129003              | 11129344 | . | - | . | gene_id "XLOC_057157"; transcript_id "TCONS_00094077"; exon_number "4"; |
| oId "CUFF.100454.5"; tss_id "TSS71634"; |          |   |   |   |                                                                         |
| chrXCufflinks exon10887086              | 10887108 | . | - | . | gene_id "XLOC_057157"; transcript_id "TCONS_00094084"; exon_number "1"; |
| oId "CUFF.100454.8"; tss_id "TSS71634"; |          |   |   |   |                                                                         |
| chrXCufflinks exon11074056              | 11074161 | . | - | . | gene_id "XLOC_057157"; transcript_id "TCONS_00094084"; exon_number "2"; |
| oId "CUFF.100454.8"; tss_id "TSS71634"; |          |   |   |   |                                                                         |
| chrXCufflinks exon11125021              | 11125110 | . | - | . | gene_id "XLOC_057157"; transcript_id "TCONS_00094084"; exon_number "3"; |
| oId "CUFF.100454.8"; tss_id "TSS71634"; |          |   |   |   |                                                                         |
| chrXCufflinks exon11129003              | 11129329 | . | - | . | gene_id "XLOC_057157"; transcript_id "TCONS_00094084"; exon_number "4"; |
| oId "CUFF.100454.8"; tss_id "TSS71634"; |          |   |   |   |                                                                         |
| chrXCufflinks exon10961875              | 10961958 | . | - | . | gene_id "XLOC_057157"; transcript_id "TCONS_00094105"; exon_number "1"; |
| oId "CUFF.100454.9"; tss_id "TSS71634"; |          |   |   |   |                                                                         |
| chrXCufflinks exon10962325              | 10962382 | . | - | . | gene_id "XLOC_057157"; transcript_id "TCONS_00094105"; exon_number "2"; |
| oId "CUFF.100454.9"; tss_id "TSS71634"; |          |   |   |   |                                                                         |
| chrXCufflinks exon11074056              | 11074161 | . | - | . | gene_id "XLOC_057157"; transcript_id "TCONS_00094105"; exon_number "3"; |
| oId "CUFF.100454.9"; tss_id "TSS71634"; |          |   |   |   |                                                                         |
| chrXCufflinks exon11125021              | 11125110 | . | - | . | gene_id "XLOC_057157"; transcript_id "TCONS_00094105"; exon_number "4"; |
| oId "CUFF.100454.9"; tss_id "TSS71634"; |          |   |   |   |                                                                         |
| chrXCufflinks exon11129003              | 11129322 | . | - | . | gene_id "XLOC_057157"; transcript_id "TCONS_00094105"; exon_number "5"; |

|                                          |          |   |   |   |                                                                         |
|------------------------------------------|----------|---|---|---|-------------------------------------------------------------------------|
| oId "CUFF.100454.9"; tss_id "TSS71634";  |          |   |   |   |                                                                         |
| chrXCufflinks exon10988038               | 10988658 | . | - | . | gene_id "XLOC_057157"; transcript_id "TCONS_00094108"; exon_number "1"; |
| oId "CUFF.100454.10"; tss_id "TSS71635"; |          |   |   |   |                                                                         |
| chrXCufflinks exon11074056               | 11074156 | . | - | . | gene_id "XLOC_057157"; transcript_id "TCONS_00094108"; exon_number "2"; |
| oId "CUFF.100454.10"; tss_id "TSS71635"; |          |   |   |   |                                                                         |
| chrXCufflinks exon11125021               | 11125110 | . | - | . | gene_id "XLOC_057157"; transcript_id "TCONS_00094108"; exon_number "3"; |
| oId "CUFF.100454.10"; tss_id "TSS71635"; |          |   |   |   |                                                                         |
| chrXCufflinks exon11129003               | 11129101 | . | - | . | gene_id "XLOC_057157"; transcript_id "TCONS_00094108"; exon_number "4"; |
| oId "CUFF.100454.10"; tss_id "TSS71635"; |          |   |   |   |                                                                         |
| chrXCufflinks exon11129185               | 11129194 | . | - | . | gene_id "XLOC_057157"; transcript_id "TCONS_00094108"; exon_number "5"; |
| oId "CUFF.100454.10"; tss_id "TSS71635"; |          |   |   |   |                                                                         |
| chrXCufflinks exon10988038               | 10988658 | . | - | . | gene_id "XLOC_057157"; transcript_id "TCONS_00094109"; exon_number "1"; |
| oId "CUFF.100454.11"; tss_id "TSS71634"; |          |   |   |   |                                                                         |
| chrXCufflinks exon11074056               | 11074161 | . | - | . | gene_id "XLOC_057157"; transcript_id "TCONS_00094109"; exon_number "2"; |
| oId "CUFF.100454.11"; tss_id "TSS71634"; |          |   |   |   |                                                                         |
| chrXCufflinks exon11125021               | 11125110 | . | - | . | gene_id "XLOC_057157"; transcript_id "TCONS_00094109"; exon_number "3"; |
| oId "CUFF.100454.11"; tss_id "TSS71634"; |          |   |   |   |                                                                         |
| chrXCufflinks exon11129003               | 11129344 | . | - | . | gene_id "XLOC_057157"; transcript_id "TCONS_00094109"; exon_number "4"; |
| oId "CUFF.100454.11"; tss_id "TSS71634"; |          |   |   |   |                                                                         |
| chrXCufflinks exon11070270               | 11070326 | . | - | . | gene_id "XLOC_057157"; transcript_id "TCONS_00094123"; exon_number "1"; |
| oId "CUFF.100454.12"; tss_id "TSS71634"; |          |   |   |   |                                                                         |
| chrXCufflinks exon11074056               | 11074156 | . | - | . | gene_id "XLOC_057157"; transcript_id "TCONS_00094123"; exon_number "2"; |
| oId "CUFF.100454.12"; tss_id "TSS71634"; |          |   |   |   |                                                                         |
| chrXCufflinks exon11125021               | 11125110 | . | - | . | gene_id "XLOC_057157"; transcript_id "TCONS_00094123"; exon_number "3"; |
| oId "CUFF.100454.12"; tss_id "TSS71634"; |          |   |   |   |                                                                         |
| chrXCufflinks exon11129003               | 11129364 | . | - | . | gene_id "XLOC_057157"; transcript_id "TCONS_00094123"; exon_number "4"; |
| oId "CUFF.100454.12"; tss_id "TSS71634"; |          |   |   |   |                                                                         |
| chrXCufflinks exon11073882               | 11073891 | . | - | . | gene_id "XLOC_057157"; transcript_id "TCONS_00094125"; exon_number "1"; |
| oId "CUFF.100454.13"; tss_id "TSS71634"; |          |   |   |   |                                                                         |
| chrXCufflinks exon11074056               | 11074156 | . | - | . | gene_id "XLOC_057157"; transcript_id "TCONS_00094125"; exon_number "2"; |
| oId "CUFF.100454.13"; tss_id "TSS71634"; |          |   |   |   |                                                                         |
| chrXCufflinks exon11125021               | 11125110 | . | - | . | gene_id "XLOC_057157"; transcript_id "TCONS_00094125"; exon_number "3"; |
| oId "CUFF.100454.13"; tss_id "TSS71634"; |          |   |   |   |                                                                         |
| chrXCufflinks exon11129003               | 11129344 | . | - | . | gene_id "XLOC_057157"; transcript_id "TCONS_00094125"; exon_number "4"; |
| oId "CUFF.100454.13"; tss_id "TSS71634"; |          |   |   |   |                                                                         |
| chrXCufflinks exon11121262               | 11121320 | . | - | . | gene_id "XLOC_057157"; transcript_id "TCONS_00094126"; exon_number "1"; |
| oId "CUFF.100454.14"; tss_id "TSS71635"; |          |   |   |   |                                                                         |
| chrXCufflinks exon11125021               | 11125110 | . | - | . | gene_id "XLOC_057157"; transcript_id "TCONS_00094126"; exon_number "2"; |
| oId "CUFF.100454.14"; tss_id "TSS71635"; |          |   |   |   |                                                                         |
| chrXCufflinks exon11129003               | 11129239 | . | - | . | gene_id "XLOC_057157"; transcript_id "TCONS_00094126"; exon_number "3"; |
| oId "CUFF.100454.14"; tss_id "TSS71635"; |          |   |   |   |                                                                         |
| chrXCufflinks exon38653291               | 38661045 | . | - | . | gene_id "XLOC_057311"; transcript_id "TCONS_00094316"; exon_number "1"; |
| oId "CUFF.100907.1"; tss_id "TSS71821";  |          |   |   |   |                                                                         |



|                                         |          |   |   |   |                                                                         |
|-----------------------------------------|----------|---|---|---|-------------------------------------------------------------------------|
| chrXCufflinks exon38662986              | 38664810 | . | - | . | gene_id "XLOC_057311"; transcript_id "TCONS_00094316"; exon_number "2"; |
| oId "CUFF.100907.1"; tss_id "TSS71821"; |          |   |   |   |                                                                         |
| chrXCufflinks exon39628554              | 39628703 | . | - | . | gene_id "XLOC_057315"; transcript_id "TCONS_00094320"; exon_number "1"; |
| oId "CUFF.100918.1"; tss_id "TSS71825"; |          |   |   |   |                                                                         |
| chrXCufflinks exon39696857              | 39698534 | . | - | . | gene_id "XLOC_057315"; transcript_id "TCONS_00094320"; exon_number "2"; |
| oId "CUFF.100918.1"; tss_id "TSS71825"; |          |   |   |   |                                                                         |
| chrXCufflinks exon39735469              | 39735533 | . | - | . | gene_id "XLOC_057315"; transcript_id "TCONS_00094320"; exon_number "3"; |
| oId "CUFF.100918.1"; tss_id "TSS71825"; |          |   |   |   |                                                                         |
| chrXCufflinks exon39737094              | 39737311 | . | - | . | gene_id "XLOC_057315"; transcript_id "TCONS_00094320"; exon_number "4"; |
| oId "CUFF.100918.1"; tss_id "TSS71825"; |          |   |   |   |                                                                         |
| chrXCufflinks exon39666865              | 39667388 | . | - | . | gene_id "XLOC_057315"; transcript_id "TCONS_00094322"; exon_number "1"; |
| oId "CUFF.100918.2"; tss_id "TSS71825"; |          |   |   |   |                                                                         |
| chrXCufflinks exon39698360              | 39698534 | . | - | . | gene_id "XLOC_057315"; transcript_id "TCONS_00094322"; exon_number "2"; |
| oId "CUFF.100918.2"; tss_id "TSS71825"; |          |   |   |   |                                                                         |
| chrXCufflinks exon39708179              | 39709146 | . | - | . | gene_id "XLOC_057315"; transcript_id "TCONS_00094322"; exon_number "3"; |
| oId "CUFF.100918.2"; tss_id "TSS71825"; |          |   |   |   |                                                                         |
| chrXCufflinks exon39735469              | 39735533 | . | - | . | gene_id "XLOC_057315"; transcript_id "TCONS_00094322"; exon_number "4"; |
| oId "CUFF.100918.2"; tss_id "TSS71825"; |          |   |   |   |                                                                         |
| chrXCufflinks exon39737094              | 39737311 | . | - | . | gene_id "XLOC_057315"; transcript_id "TCONS_00094322"; exon_number "5"; |
| oId "CUFF.100918.2"; tss_id "TSS71825"; |          |   |   |   |                                                                         |
| chrXCufflinks exon39695502              | 39698534 | . | - | . | gene_id "XLOC_057315"; transcript_id "TCONS_00094324"; exon_number "1"; |
| oId "CUFF.100918.3"; tss_id "TSS71825"; |          |   |   |   |                                                                         |
| chrXCufflinks exon39735469              | 39735543 | . | - | . | gene_id "XLOC_057315"; transcript_id "TCONS_00094324"; exon_number "2"; |
| oId "CUFF.100918.3"; tss_id "TSS71825"; |          |   |   |   |                                                                         |
| chrXCufflinks exon39737104              | 39737301 | . | - | . | gene_id "XLOC_057315"; transcript_id "TCONS_00094324"; exon_number "3"; |
| oId "CUFF.100918.3"; tss_id "TSS71825"; |          |   |   |   |                                                                         |
| chrXCufflinks exon39695502              | 39698534 | . | - | . | gene_id "XLOC_057315"; transcript_id "TCONS_00094325"; exon_number "1"; |
| oId "CUFF.100918.4"; tss_id "TSS71825"; |          |   |   |   |                                                                         |
| chrXCufflinks exon39737094              | 39737311 | . | - | . | gene_id "XLOC_057315"; transcript_id "TCONS_00094325"; exon_number "2"; |
| oId "CUFF.100918.4"; tss_id "TSS71825"; |          |   |   |   |                                                                         |
| chrXCufflinks exon39710305              | 39715164 | . | - | . | gene_id "XLOC_057315"; transcript_id "TCONS_00094327"; exon_number "1"; |
| oId "CUFF.100918.5"; tss_id "TSS71825"; |          |   |   |   |                                                                         |
| chrXCufflinks exon39737094              | 39737311 | . | - | . | gene_id "XLOC_057315"; transcript_id "TCONS_00094327"; exon_number "2"; |
| oId "CUFF.100918.5"; tss_id "TSS71825"; |          |   |   |   |                                                                         |
| chrXCufflinks exon45628075              | 45629355 | . | - | . | gene_id "XLOC_057383"; transcript_id "TCONS_00094415"; exon_number "1"; |
| oId "CUFF.101047.2"; tss_id "TSS71900"; |          |   |   |   |                                                                         |
| chrXCufflinks exon45629488              | 45631842 | . | - | . | gene_id "XLOC_057383"; transcript_id "TCONS_00094415"; exon_number "2"; |
| oId "CUFF.101047.2"; tss_id "TSS71900"; |          |   |   |   |                                                                         |
| chrXCufflinks exon45628075              | 45629355 | . | - | . | gene_id "XLOC_057383"; transcript_id "TCONS_00094416"; exon_number "1"; |
| oId "CUFF.101047.1"; tss_id "TSS71901"; |          |   |   |   |                                                                         |
| chrXCufflinks exon45708809              | 45708906 | . | - | . | gene_id "XLOC_057383"; transcript_id "TCONS_00094416"; exon_number "2"; |
| oId "CUFF.101047.1"; tss_id "TSS71901"; |          |   |   |   |                                                                         |
| chrXCufflinks exon45710784              | 45710955 | . | - | . | gene_id "XLOC_057383"; transcript_id "TCONS_00094416"; exon_number "3"; |

|                                                                                |   |   |   |                                                                         |
|--------------------------------------------------------------------------------|---|---|---|-------------------------------------------------------------------------|
| oId "CUFF.101047.1"; tss_id "TSS71901";<br>chrXCufflinks exon46746854 46747127 | . | - | . | gene_id "XLOC_057402"; transcript_id "TCONS_00094444"; exon_number "1"; |
| oId "CUFF.101116.1"; tss_id "TSS71923";<br>chrXCufflinks exon46749728 46749814 | . | - | . | gene_id "XLOC_057402"; transcript_id "TCONS_00094444"; exon_number "2"; |
| oId "CUFF.101116.1"; tss_id "TSS71923";<br>chrXCufflinks exon46753959 46754016 | . | - | . | gene_id "XLOC_057402"; transcript_id "TCONS_00094444"; exon_number "3"; |
| oId "CUFF.101116.1"; tss_id "TSS71923";<br>chrXCufflinks exon46759039 46759139 | . | - | . | gene_id "XLOC_057402"; transcript_id "TCONS_00094444"; exon_number "4"; |
| oId "CUFF.101116.1"; tss_id "TSS71923";<br>chrXCufflinks exon46946079 46946115 | . | - | . | gene_id "XLOC_057403"; transcript_id "TCONS_00094445"; exon_number "1"; |
| oId "CUFF.101125.1"; tss_id "TSS71924";<br>chrXCufflinks exon46988765 46989140 | . | - | . | gene_id "XLOC_057403"; transcript_id "TCONS_00094445"; exon_number "2"; |
| oId "CUFF.101125.1"; tss_id "TSS71924";<br>chrXCufflinks exon46985119 46985242 | . | - | . | gene_id "XLOC_057403"; transcript_id "TCONS_00094446"; exon_number "1"; |
| oId "CUFF.101125.2"; tss_id "TSS71924";<br>chrXCufflinks exon46985645 46985774 | . | - | . | gene_id "XLOC_057403"; transcript_id "TCONS_00094446"; exon_number "2"; |
| oId "CUFF.101125.2"; tss_id "TSS71924";<br>chrXCufflinks exon46988764 46989190 | . | - | . | gene_id "XLOC_057403"; transcript_id "TCONS_00094446"; exon_number "3"; |
| oId "CUFF.101125.2"; tss_id "TSS71924";<br>chrXCufflinks exon46985119 46985249 | . | - | . | gene_id "XLOC_057403"; transcript_id "TCONS_00094447"; exon_number "1"; |
| oId "CUFF.101125.3"; tss_id "TSS71925";<br>chrXCufflinks exon46985645 46985774 | . | - | . | gene_id "XLOC_057403"; transcript_id "TCONS_00094447"; exon_number "2"; |
| oId "CUFF.101125.3"; tss_id "TSS71925";<br>chrXCufflinks exon46988764 46989165 | . | - | . | gene_id "XLOC_057403"; transcript_id "TCONS_00094447"; exon_number "3"; |
| oId "CUFF.101125.3"; tss_id "TSS71925";<br>chrXCufflinks exon46991728 46991811 | . | - | . | gene_id "XLOC_057403"; transcript_id "TCONS_00094447"; exon_number "4"; |
| oId "CUFF.101125.3"; tss_id "TSS71925";<br>chrXCufflinks exon70403237 70403808 | . | - | . | gene_id "XLOC_057598"; transcript_id "TCONS_00094784"; exon_number "1"; |
| oId "CUFF.102062.1"; tss_id "TSS72176";<br>chrXCufflinks exon70496705 70496795 | . | - | . | gene_id "XLOC_057598"; transcript_id "TCONS_00094784"; exon_number "2"; |
| oId "CUFF.102062.1"; tss_id "TSS72176";<br>chrXCufflinks exon73040486 73042051 | . | - | . | gene_id "XLOC_057619"; transcript_id "TCONS_00094824"; exon_number "1"; |
| oId "CUFF.102171.3"; tss_id "TSS72203";<br>chrXCufflinks exon73045950 73047819 | . | - | . | gene_id "XLOC_057619"; transcript_id "TCONS_00094824"; exon_number "2"; |
| oId "CUFF.102171.3"; tss_id "TSS72203";<br>chrXCufflinks exon73048903 73049066 | . | - | . | gene_id "XLOC_057619"; transcript_id "TCONS_00094824"; exon_number "3"; |
| oId "CUFF.102171.3"; tss_id "TSS72203";<br>chrXCufflinks exon73050901 73051109 | . | - | . | gene_id "XLOC_057619"; transcript_id "TCONS_00094824"; exon_number "4"; |
| oId "CUFF.102171.3"; tss_id "TSS72203";<br>chrXCufflinks exon73053073 73053211 | . | - | . | gene_id "XLOC_057619"; transcript_id "TCONS_00094824"; exon_number "5"; |
| oId "CUFF.102171.3"; tss_id "TSS72203";<br>chrXCufflinks exon73057277 73057338 | . | - | . | gene_id "XLOC_057619"; transcript_id "TCONS_00094824"; exon_number "6"; |
| oId "CUFF.102171.3"; tss_id "TSS72203";                                        |   |   |   |                                                                         |

|                                         |          |   |   |   |                                                                         |
|-----------------------------------------|----------|---|---|---|-------------------------------------------------------------------------|
| chrXCufflinks exon73061217              | 73072588 | . | - | . | gene_id "XLOC_057619"; transcript_id "TCONS_00094824"; exon_number "7"; |
| oId "CUFF.102171.3"; tss_id "TSS72203"; |          |   |   |   |                                                                         |
| chrXCufflinks exon73040486              | 73042052 | . | - | . | gene_id "XLOC_057619"; transcript_id "TCONS_00094825"; exon_number "1"; |
| oId "CUFF.102171.4"; tss_id "TSS72203"; |          |   |   |   |                                                                         |
| chrXCufflinks exon73045951              | 73047819 | . | - | . | gene_id "XLOC_057619"; transcript_id "TCONS_00094825"; exon_number "2"; |
| oId "CUFF.102171.4"; tss_id "TSS72203"; |          |   |   |   |                                                                         |
| chrXCufflinks exon73048903              | 73049066 | . | - | . | gene_id "XLOC_057619"; transcript_id "TCONS_00094825"; exon_number "3"; |
| oId "CUFF.102171.4"; tss_id "TSS72203"; |          |   |   |   |                                                                         |
| chrXCufflinks exon73050901              | 73051109 | . | - | . | gene_id "XLOC_057619"; transcript_id "TCONS_00094825"; exon_number "4"; |
| oId "CUFF.102171.4"; tss_id "TSS72203"; |          |   |   |   |                                                                         |
| chrXCufflinks exon73053073              | 73053209 | . | - | . | gene_id "XLOC_057619"; transcript_id "TCONS_00094825"; exon_number "5"; |
| oId "CUFF.102171.4"; tss_id "TSS72203"; |          |   |   |   |                                                                         |
| chrXCufflinks exon73057275              | 73057338 | . | - | . | gene_id "XLOC_057619"; transcript_id "TCONS_00094825"; exon_number "6"; |
| oId "CUFF.102171.4"; tss_id "TSS72203"; |          |   |   |   |                                                                         |
| chrXCufflinks exon73061217              | 73072588 | . | - | . | gene_id "XLOC_057619"; transcript_id "TCONS_00094825"; exon_number "7"; |
| oId "CUFF.102171.4"; tss_id "TSS72203"; |          |   |   |   |                                                                         |
| chrXCufflinks exon73040486              | 73047819 | . | - | . | gene_id "XLOC_057619"; transcript_id "TCONS_00094823"; exon_number "1"; |
| oId "CUFF.102171.2"; tss_id "TSS72203"; |          |   |   |   |                                                                         |
| chrXCufflinks exon73048903              | 73049066 | . | - | . | gene_id "XLOC_057619"; transcript_id "TCONS_00094823"; exon_number "2"; |
| oId "CUFF.102171.2"; tss_id "TSS72203"; |          |   |   |   |                                                                         |
| chrXCufflinks exon73050901              | 73051109 | . | - | . | gene_id "XLOC_057619"; transcript_id "TCONS_00094823"; exon_number "3"; |
| oId "CUFF.102171.2"; tss_id "TSS72203"; |          |   |   |   |                                                                         |
| chrXCufflinks exon73053073              | 73053209 | . | - | . | gene_id "XLOC_057619"; transcript_id "TCONS_00094823"; exon_number "4"; |
| oId "CUFF.102171.2"; tss_id "TSS72203"; |          |   |   |   |                                                                         |
| chrXCufflinks exon73057275              | 73057338 | . | - | . | gene_id "XLOC_057619"; transcript_id "TCONS_00094823"; exon_number "5"; |
| oId "CUFF.102171.2"; tss_id "TSS72203"; |          |   |   |   |                                                                         |
| chrXCufflinks exon73061217              | 73072588 | . | - | . | gene_id "XLOC_057619"; transcript_id "TCONS_00094823"; exon_number "6"; |
| oId "CUFF.102171.2"; tss_id "TSS72203"; |          |   |   |   |                                                                         |
| chrXCufflinks exon73040486              | 73047819 | . | - | . | gene_id "XLOC_057619"; transcript_id "TCONS_00094822"; exon_number "1"; |
| oId "CUFF.102171.1"; tss_id "TSS72203"; |          |   |   |   |                                                                         |
| chrXCufflinks exon73048903              | 73049066 | . | - | . | gene_id "XLOC_057619"; transcript_id "TCONS_00094822"; exon_number "2"; |
| oId "CUFF.102171.1"; tss_id "TSS72203"; |          |   |   |   |                                                                         |
| chrXCufflinks exon73050901              | 73051109 | . | - | . | gene_id "XLOC_057619"; transcript_id "TCONS_00094822"; exon_number "3"; |
| oId "CUFF.102171.1"; tss_id "TSS72203"; |          |   |   |   |                                                                         |
| chrXCufflinks exon73057275              | 73057338 | . | - | . | gene_id "XLOC_057619"; transcript_id "TCONS_00094822"; exon_number "4"; |
| oId "CUFF.102171.1"; tss_id "TSS72203"; |          |   |   |   |                                                                         |
| chrXCufflinks exon73061217              | 73072588 | . | - | . | gene_id "XLOC_057619"; transcript_id "TCONS_00094822"; exon_number "5"; |
| oId "CUFF.102171.1"; tss_id "TSS72203"; |          |   |   |   |                                                                         |
| chrXCufflinks exon84466933              | 84467083 | . | - | . | gene_id "XLOC_057686"; transcript_id "TCONS_00094926"; exon_number "1"; |
| oId "CUFF.102629.1"; tss_id "TSS72280"; |          |   |   |   |                                                                         |
| chrXCufflinks exon84479211              | 84479332 | . | - | . | gene_id "XLOC_057686"; transcript_id "TCONS_00094926"; exon_number "2"; |
| oId "CUFF.102629.1"; tss_id "TSS72280"; |          |   |   |   |                                                                         |
| chrXCufflinks exon84498594              | 84498848 | . | - | . | gene_id "XLOC_057686"; transcript_id "TCONS_00094926"; exon_number "3"; |

|                                         |   |   |   |                                                                         |
|-----------------------------------------|---|---|---|-------------------------------------------------------------------------|
| oId "CUFF.102629.1"; tss_id "TSS72280"; |   |   |   |                                                                         |
| chrXCufflinks exon118603197 118603208   | . | - | . | gene_id "XLOC_057845"; transcript_id "TCONS_00095195"; exon_number "1"; |
| oId "CUFF.103181.1"; tss_id "TSS72471"; |   |   |   |                                                                         |
| chrXCufflinks exon118739916 118740401   | . | - | . | gene_id "XLOC_057845"; transcript_id "TCONS_00095195"; exon_number "2"; |
| oId "CUFF.103181.1"; tss_id "TSS72471"; |   |   |   |                                                                         |
| chrXCufflinks exon118890440 118893688   | . | - | . | gene_id "XLOC_057852"; transcript_id "TCONS_00095209"; exon_number "1"; |
| oId "CUFF.103207.5"; tss_id "TSS72479"; |   |   |   |                                                                         |
| chrXCufflinks exon118903137 118903305   | . | - | . | gene_id "XLOC_057852"; transcript_id "TCONS_00095209"; exon_number "2"; |
| oId "CUFF.103207.5"; tss_id "TSS72479"; |   |   |   |                                                                         |
| chrXCufflinks exon118903761 118903868   | . | - | . | gene_id "XLOC_057852"; transcript_id "TCONS_00095209"; exon_number "3"; |
| oId "CUFF.103207.5"; tss_id "TSS72479"; |   |   |   |                                                                         |
| chrXCufflinks exon118890440 118893689   | . | - | . | gene_id "XLOC_057852"; transcript_id "TCONS_00095208"; exon_number "1"; |
| oId "CUFF.103207.4"; tss_id "TSS72479"; |   |   |   |                                                                         |
| chrXCufflinks exon118903070 118903305   | . | - | . | gene_id "XLOC_057852"; transcript_id "TCONS_00095208"; exon_number "2"; |
| oId "CUFF.103207.4"; tss_id "TSS72479"; |   |   |   |                                                                         |
| chrXCufflinks exon118903761 118903868   | . | - | . | gene_id "XLOC_057852"; transcript_id "TCONS_00095208"; exon_number "3"; |
| oId "CUFF.103207.4"; tss_id "TSS72479"; |   |   |   |                                                                         |
| chrXCufflinks exon118890440 118892060   | . | - | . | gene_id "XLOC_057852"; transcript_id "TCONS_00095207"; exon_number "1"; |
| oId "CUFF.103207.3"; tss_id "TSS72479"; |   |   |   |                                                                         |
| chrXCufflinks exon118893396 118893688   | . | - | . | gene_id "XLOC_057852"; transcript_id "TCONS_00095207"; exon_number "2"; |
| oId "CUFF.103207.3"; tss_id "TSS72479"; |   |   |   |                                                                         |
| chrXCufflinks exon118903069 118903305   | . | - | . | gene_id "XLOC_057852"; transcript_id "TCONS_00095207"; exon_number "3"; |
| oId "CUFF.103207.3"; tss_id "TSS72479"; |   |   |   |                                                                         |
| chrXCufflinks exon118903761 118903868   | . | - | . | gene_id "XLOC_057852"; transcript_id "TCONS_00095207"; exon_number "4"; |
| oId "CUFF.103207.3"; tss_id "TSS72479"; |   |   |   |                                                                         |
| chrXCufflinks exon118902679 118903305   | . | - | . | gene_id "XLOC_057852"; transcript_id "TCONS_00095211"; exon_number "1"; |
| oId "CUFF.103207.6"; tss_id "TSS72479"; |   |   |   |                                                                         |
| chrXCufflinks exon118903761 118903868   | . | - | . | gene_id "XLOC_057852"; transcript_id "TCONS_00095211"; exon_number "2"; |
| oId "CUFF.103207.6"; tss_id "TSS72479"; |   |   |   |                                                                         |
| chrXCufflinks exon118940145 118941355   | . | - | . | gene_id "XLOC_057855"; transcript_id "TCONS_00095214"; exon_number "1"; |
| oId "CUFF.103219.4"; tss_id "TSS72483"; |   |   |   |                                                                         |
| chrXCufflinks exon118964849 118966027   | . | - | . | gene_id "XLOC_057855"; transcript_id "TCONS_00095214"; exon_number "2"; |
| oId "CUFF.103219.4"; tss_id "TSS72483"; |   |   |   |                                                                         |
| chrXCufflinks exon125606346 125606880   | . | - | . | gene_id "XLOC_057893"; transcript_id "TCONS_00095283"; exon_number "1"; |
| oId "CUFF.103385.2"; tss_id "TSS72529"; |   |   |   |                                                                         |
| chrXCufflinks exon125892747 125892753   | . | - | . | gene_id "XLOC_057893"; transcript_id "TCONS_00095283"; exon_number "2"; |
| oId "CUFF.103385.2"; tss_id "TSS72529"; |   |   |   |                                                                         |
| chrXCufflinks exon129303483 129305824   | . | - | . | gene_id "XLOC_057910"; transcript_id "TCONS_00095313"; exon_number "1"; |
| oId "CUFF.103440.1"; tss_id "TSS72552"; |   |   |   |                                                                         |
| chrXCufflinks exon129306522 129306596   | . | - | . | gene_id "XLOC_057910"; transcript_id "TCONS_00095313"; exon_number "2"; |
| oId "CUFF.103440.1"; tss_id "TSS72552"; |   |   |   |                                                                         |
| chrXCufflinks exon130822682 130824043   | . | - | . | gene_id "XLOC_057918"; transcript_id "TCONS_00095327"; exon_number "1"; |
| oId "CUFF.103479.4"; tss_id "TSS72561"; |   |   |   |                                                                         |

chrXCufflinks exon130825913 130825951 . - . gene\_id "XLOC\_057918"; transcript\_id "TCONS\_00095327"; exon\_number "2";  
oId "CUFF.103479.4"; tss\_id "TSS72561";  
chrXCufflinks exon130826466 130826664 . - . gene\_id "XLOC\_057918"; transcript\_id "TCONS\_00095327"; exon\_number "3";  
oId "CUFF.103479.4"; tss\_id "TSS72561";  
chrXCufflinks exon130877124 130877276 . - . gene\_id "XLOC\_057918"; transcript\_id "TCONS\_00095327"; exon\_number "4";  
oId "CUFF.103479.4"; tss\_id "TSS72561";  
chrXCufflinks exon130883334 130883486 . - . gene\_id "XLOC\_057918"; transcript\_id "TCONS\_00095327"; exon\_number "5";  
oId "CUFF.103479.4"; tss\_id "TSS72561";  
chrXCufflinks exon130889626 130889774 . - . gene\_id "XLOC\_057918"; transcript\_id "TCONS\_00095327"; exon\_number "6";  
oId "CUFF.103479.4"; tss\_id "TSS72561";  
chrXCufflinks exon130890639 130890737 . - . gene\_id "XLOC\_057918"; transcript\_id "TCONS\_00095327"; exon\_number "7";  
oId "CUFF.103479.4"; tss\_id "TSS72561";  
chrXCufflinks exon130902577 130902724 . - . gene\_id "XLOC\_057918"; transcript\_id "TCONS\_00095327"; exon\_number "8";  
oId "CUFF.103479.4"; tss\_id "TSS72561";  
chrXCufflinks exon130911651 130911772 . - . gene\_id "XLOC\_057918"; transcript\_id "TCONS\_00095327"; exon\_number "9";  
oId "CUFF.103479.4"; tss\_id "TSS72561";  
chrXCufflinks exon130917915 130918067 . - . gene\_id "XLOC\_057918"; transcript\_id "TCONS\_00095327"; exon\_number "10";  
oId "CUFF.103479.4"; tss\_id "TSS72561";  
chrXCufflinks exon130928022 130928143 . - . gene\_id "XLOC\_057918"; transcript\_id "TCONS\_00095327"; exon\_number "11";  
oId "CUFF.103479.4"; tss\_id "TSS72561";  
chrXCufflinks exon130928325 130928494 . - . gene\_id "XLOC\_057918"; transcript\_id "TCONS\_00095327"; exon\_number "12";  
oId "CUFF.103479.4"; tss\_id "TSS72561";  
chrXCufflinks exon130929837 130930359 . - . gene\_id "XLOC\_057918"; transcript\_id "TCONS\_00095327"; exon\_number "13";  
oId "CUFF.103479.4"; tss\_id "TSS72561";  
chrXCufflinks exon130939000 130939065 . - . gene\_id "XLOC\_057918"; transcript\_id "TCONS\_00095327"; exon\_number "14";  
oId "CUFF.103479.4"; tss\_id "TSS72561";  
chrXCufflinks exon130959250 130959393 . - . gene\_id "XLOC\_057918"; transcript\_id "TCONS\_00095327"; exon\_number "15";  
oId "CUFF.103479.4"; tss\_id "TSS72561";  
chrXCufflinks exon130964320 130964671 . - . gene\_id "XLOC\_057918"; transcript\_id "TCONS\_00095327"; exon\_number "16";  
oId "CUFF.103479.4"; tss\_id "TSS72561";  
chrXCufflinks exon130836678 130837546 . - . gene\_id "XLOC\_057918"; transcript\_id "TCONS\_00095329"; exon\_number "1";  
oId "CUFF.103479.8"; tss\_id "TSS72561";  
chrXCufflinks exon130843526 130843584 . - . gene\_id "XLOC\_057918"; transcript\_id "TCONS\_00095329"; exon\_number "2";  
oId "CUFF.103479.8"; tss\_id "TSS72561";  
chrXCufflinks exon130845679 130845748 . - . gene\_id "XLOC\_057918"; transcript\_id "TCONS\_00095329"; exon\_number "3";  
oId "CUFF.103479.8"; tss\_id "TSS72561";  
chrXCufflinks exon130883334 130883486 . - . gene\_id "XLOC\_057918"; transcript\_id "TCONS\_00095329"; exon\_number "4";  
oId "CUFF.103479.8"; tss\_id "TSS72561";  
chrXCufflinks exon130889626 130889774 . - . gene\_id "XLOC\_057918"; transcript\_id "TCONS\_00095329"; exon\_number "5";  
oId "CUFF.103479.8"; tss\_id "TSS72561";  
chrXCufflinks exon130890639 130890737 . - . gene\_id "XLOC\_057918"; transcript\_id "TCONS\_00095329"; exon\_number "6";  
oId "CUFF.103479.8"; tss\_id "TSS72561";  
chrXCufflinks exon130902577 130902724 . - . gene\_id "XLOC\_057918"; transcript\_id "TCONS\_00095329"; exon\_number "7";

|                                                                                   |   |   |   |                                                                          |
|-----------------------------------------------------------------------------------|---|---|---|--------------------------------------------------------------------------|
| oId "CUFF.103479.8"; tss_id "TSS72561";<br>chrXCufflinks exon130917915 130918067  | . | - | . | gene_id "XLOC_057918"; transcript_id "TCONS_00095329"; exon_number "8";  |
| oId "CUFF.103479.8"; tss_id "TSS72561";<br>chrXCufflinks exon130928352 130928494  | . | - | . | gene_id "XLOC_057918"; transcript_id "TCONS_00095329"; exon_number "9";  |
| oId "CUFF.103479.8"; tss_id "TSS72561";<br>chrXCufflinks exon130929837 130930359  | . | - | . | gene_id "XLOC_057918"; transcript_id "TCONS_00095329"; exon_number "10"; |
| oId "CUFF.103479.8"; tss_id "TSS72561";<br>chrXCufflinks exon130939000 130939065  | . | - | . | gene_id "XLOC_057918"; transcript_id "TCONS_00095329"; exon_number "11"; |
| oId "CUFF.103479.8"; tss_id "TSS72561";<br>chrXCufflinks exon130959250 130959393  | . | - | . | gene_id "XLOC_057918"; transcript_id "TCONS_00095329"; exon_number "12"; |
| oId "CUFF.103479.8"; tss_id "TSS72561";<br>chrXCufflinks exon130964320 130964671  | . | - | . | gene_id "XLOC_057918"; transcript_id "TCONS_00095329"; exon_number "13"; |
| oId "CUFF.103479.8"; tss_id "TSS72561";<br>chrXCufflinks exon130871555 130871611  | . | - | . | gene_id "XLOC_057918"; transcript_id "TCONS_00095335"; exon_number "1";  |
| oId "CUFF.103479.9"; tss_id "TSS72562";<br>chrXCufflinks exon130877124 130877276  | . | - | . | gene_id "XLOC_057918"; transcript_id "TCONS_00095335"; exon_number "2";  |
| oId "CUFF.103479.9"; tss_id "TSS72562";<br>chrXCufflinks exon130883334 130883486  | . | - | . | gene_id "XLOC_057918"; transcript_id "TCONS_00095335"; exon_number "3";  |
| oId "CUFF.103479.9"; tss_id "TSS72562";<br>chrXCufflinks exon130889626 130889774  | . | - | . | gene_id "XLOC_057918"; transcript_id "TCONS_00095335"; exon_number "4";  |
| oId "CUFF.103479.9"; tss_id "TSS72562";<br>chrXCufflinks exon130890671 130890737  | . | - | . | gene_id "XLOC_057918"; transcript_id "TCONS_00095335"; exon_number "5";  |
| oId "CUFF.103479.9"; tss_id "TSS72562";<br>chrXCufflinks exon130902577 130902724  | . | - | . | gene_id "XLOC_057918"; transcript_id "TCONS_00095335"; exon_number "6";  |
| oId "CUFF.103479.9"; tss_id "TSS72562";<br>chrXCufflinks exon130928022 130928143  | . | - | . | gene_id "XLOC_057918"; transcript_id "TCONS_00095335"; exon_number "7";  |
| oId "CUFF.103479.9"; tss_id "TSS72562";<br>chrXCufflinks exon130928352 130930359  | . | - | . | gene_id "XLOC_057918"; transcript_id "TCONS_00095335"; exon_number "8";  |
| oId "CUFF.103479.9"; tss_id "TSS72562";<br>chrXCufflinks exon130939000 130939065  | . | - | . | gene_id "XLOC_057918"; transcript_id "TCONS_00095335"; exon_number "9";  |
| oId "CUFF.103479.9"; tss_id "TSS72562";<br>chrXCufflinks exon130959250 130959393  | . | - | . | gene_id "XLOC_057918"; transcript_id "TCONS_00095335"; exon_number "10"; |
| oId "CUFF.103479.9"; tss_id "TSS72562";<br>chrXCufflinks exon130964320 130964939  | . | - | . | gene_id "XLOC_057918"; transcript_id "TCONS_00095335"; exon_number "11"; |
| oId "CUFF.103479.9"; tss_id "TSS72562";<br>chrXCufflinks exon130928499 130930359  | . | - | . | gene_id "XLOC_057918"; transcript_id "TCONS_00095344"; exon_number "1";  |
| oId "CUFF.103479.10"; tss_id "TSS72561";<br>chrXCufflinks exon130959250 130959393 | . | - | . | gene_id "XLOC_057918"; transcript_id "TCONS_00095344"; exon_number "2";  |
| oId "CUFF.103479.10"; tss_id "TSS72561";<br>chrXCufflinks exon130964320 130964685 | . | - | . | gene_id "XLOC_057918"; transcript_id "TCONS_00095344"; exon_number "3";  |
| oId "CUFF.103479.10"; tss_id "TSS72561";<br>chrXCufflinks exon130928499 130930359 | . | - | . | gene_id "XLOC_057918"; transcript_id "TCONS_00095345"; exon_number "1";  |
| oId "CUFF.103479.11"; tss_id "TSS72562";                                          |   |   |   |                                                                          |

|                                          |           |   |   |   |                                                                         |
|------------------------------------------|-----------|---|---|---|-------------------------------------------------------------------------|
| chrXCufflinks exon130939000              | 130939065 | . | - | . | gene_id "XLOC_057918"; transcript_id "TCONS_00095345"; exon_number "2"; |
| oId "CUFF.103479.11"; tss_id "TSS72562"; |           |   |   |   |                                                                         |
| chrXCufflinks exon130958215              | 130959393 | . | - | . | gene_id "XLOC_057918"; transcript_id "TCONS_00095345"; exon_number "3"; |
| oId "CUFF.103479.11"; tss_id "TSS72562"; |           |   |   |   |                                                                         |
| chrXCufflinks exon130964320              | 130964944 | . | - | . | gene_id "XLOC_057918"; transcript_id "TCONS_00095345"; exon_number "4"; |
| oId "CUFF.103479.11"; tss_id "TSS72562"; |           |   |   |   |                                                                         |
| chrXCufflinks exon133306636              | 133307243 | . | - | . | gene_id "XLOC_057948"; transcript_id "TCONS_00095388"; exon_number "1"; |
| oId "CUFF.103548.2"; tss_id "TSS72603";  |           |   |   |   |                                                                         |
| chrXCufflinks exon133307713              | 133308147 | . | - | . | gene_id "XLOC_057948"; transcript_id "TCONS_00095388"; exon_number "2"; |
| oId "CUFF.103548.2"; tss_id "TSS72603";  |           |   |   |   |                                                                         |
| chrXCufflinks exon133306636              | 133307243 | . | - | . | gene_id "XLOC_057948"; transcript_id "TCONS_00095387"; exon_number "1"; |
| oId "CUFF.103548.1"; tss_id "TSS72603";  |           |   |   |   |                                                                         |
| chrXCufflinks exon133308048              | 133308147 | . | - | . | gene_id "XLOC_057948"; transcript_id "TCONS_00095387"; exon_number "2"; |
| oId "CUFF.103548.1"; tss_id "TSS72603";  |           |   |   |   |                                                                         |
| chrXCufflinks exon133675232              | 133678029 | . | - | . | gene_id "XLOC_057949"; transcript_id "TCONS_00095390"; exon_number "1"; |
| oId "CUFF.103579.3"; tss_id "TSS72604";  |           |   |   |   |                                                                         |
| chrXCufflinks exon133678744              | 133680570 | . | - | . | gene_id "XLOC_057949"; transcript_id "TCONS_00095390"; exon_number "2"; |
| oId "CUFF.103579.3"; tss_id "TSS72604";  |           |   |   |   |                                                                         |
| chrXCufflinks exon133675232              | 133678029 | . | - | . | gene_id "XLOC_057949"; transcript_id "TCONS_00095392"; exon_number "1"; |
| oId "CUFF.103579.6"; tss_id "TSS72604";  |           |   |   |   |                                                                         |
| chrXCufflinks exon133678744              | 133678827 | . | - | . | gene_id "XLOC_057949"; transcript_id "TCONS_00095392"; exon_number "2"; |
| oId "CUFF.103579.6"; tss_id "TSS72604";  |           |   |   |   |                                                                         |
| chrXCufflinks exon133680582              | 133680660 | . | - | . | gene_id "XLOC_057949"; transcript_id "TCONS_00095392"; exon_number "3"; |
| oId "CUFF.103579.6"; tss_id "TSS72604";  |           |   |   |   |                                                                         |
| chrXCufflinks exon133675232              | 133677961 | . | - | . | gene_id "XLOC_057949"; transcript_id "TCONS_00095391"; exon_number "1"; |
| oId "CUFF.103579.4"; tss_id "TSS72604";  |           |   |   |   |                                                                         |
| chrXCufflinks exon133678744              | 133680135 | . | - | . | gene_id "XLOC_057949"; transcript_id "TCONS_00095391"; exon_number "2"; |
| oId "CUFF.103579.4"; tss_id "TSS72604";  |           |   |   |   |                                                                         |
| chrXCufflinks exon133680582              | 133680660 | . | - | . | gene_id "XLOC_057949"; transcript_id "TCONS_00095391"; exon_number "3"; |
| oId "CUFF.103579.4"; tss_id "TSS72604";  |           |   |   |   |                                                                         |
| chrXCufflinks exon133675232              | 133677961 | . | - | . | gene_id "XLOC_057949"; transcript_id "TCONS_00095394"; exon_number "1"; |
| oId "CUFF.103579.5"; tss_id "TSS72604";  |           |   |   |   |                                                                         |
| chrXCufflinks exon133678744              | 133678827 | . | - | . | gene_id "XLOC_057949"; transcript_id "TCONS_00095394"; exon_number "2"; |
| oId "CUFF.103579.5"; tss_id "TSS72604";  |           |   |   |   |                                                                         |
| chrXCufflinks exon133680582              | 133680663 | . | - | . | gene_id "XLOC_057949"; transcript_id "TCONS_00095394"; exon_number "3"; |
| oId "CUFF.103579.5"; tss_id "TSS72604";  |           |   |   |   |                                                                         |
| chrXCufflinks exon150473059              | 150473539 | . | - | . | gene_id "XLOC_058034"; transcript_id "TCONS_00095544"; exon_number "1"; |
| oId "CUFF.103858.1"; tss_id "TSS72711";  |           |   |   |   |                                                                         |
| chrXCufflinks exon150564349              | 150565539 | . | - | . | gene_id "XLOC_058034"; transcript_id "TCONS_00095544"; exon_number "2"; |
| oId "CUFF.103858.1"; tss_id "TSS72711";  |           |   |   |   |                                                                         |
| chrXCufflinks exon150475408              | 150475505 | . | - | . | gene_id "XLOC_058034"; transcript_id "TCONS_00095545"; exon_number "1"; |
| oId "CUFF.103858.2"; tss_id "TSS72711";  |           |   |   |   |                                                                         |
| chrXCufflinks exon150564349              | 150565522 | . | - | . | gene_id "XLOC_058034"; transcript_id "TCONS_00095545"; exon_number "2"; |

oId "CUFF.103858.2"; tss\_id "TSS72711";  
chrXCufflinks exon150537261 150537344 . - . gene\_id "XLOC\_058034"; transcript\_id "TCONS\_00095546"; exon\_number "1";  
oId "CUFF.103858.3"; tss\_id "TSS72711";  
chrXCufflinks exon150564349 150565522 . - . gene\_id "XLOC\_058034"; transcript\_id "TCONS\_00095546"; exon\_number "2";  
oId "CUFF.103858.3"; tss\_id "TSS72711";  
chrXCufflinks exon150559422 150561158 . - . gene\_id "XLOC\_058034"; transcript\_id "TCONS\_00095550"; exon\_number "1";  
oId "CUFF.103858.4"; tss\_id "TSS72711";  
chrXCufflinks exon150564349 150565522 . - . gene\_id "XLOC\_058034"; transcript\_id "TCONS\_00095550"; exon\_number "2";  
oId "CUFF.103858.4"; tss\_id "TSS72711";  
chrXCufflinks exon153027102 153027548 . - . gene\_id "XLOC\_058060"; transcript\_id "TCONS\_00095583"; exon\_number "1";  
oId "CUFF.103958.1"; tss\_id "TSS72744";  
chrXCufflinks exon153028397 153028550 . - . gene\_id "XLOC\_058060"; transcript\_id "TCONS\_00095583"; exon\_number "2";  
oId "CUFF.103958.1"; tss\_id "TSS72744";  
chrXCufflinks exon153028818 153028928 . - . gene\_id "XLOC\_058060"; transcript\_id "TCONS\_00095583"; exon\_number "3";  
oId "CUFF.103958.1"; tss\_id "TSS72744";  
chrXCufflinks exon153029165 153029272 . - . gene\_id "XLOC\_058060"; transcript\_id "TCONS\_00095583"; exon\_number "4";  
oId "CUFF.103958.1"; tss\_id "TSS72744";  
chrXCufflinks exon153031838 153031915 . - . gene\_id "XLOC\_058060"; transcript\_id "TCONS\_00095583"; exon\_number "5";  
oId "CUFF.103958.1"; tss\_id "TSS72744";  
chrYCufflinks exon20488419 20488576 . + . gene\_id "XLOC\_058182"; transcript\_id "TCONS\_00095768"; exon\_number "1";  
oId "CUFF.104378.1"; tss\_id "TSS72891";  
chrYCufflinks exon20491077 20491194 . + . gene\_id "XLOC\_058182"; transcript\_id "TCONS\_00095768"; exon\_number "2";  
oId "CUFF.104378.1"; tss\_id "TSS72891";  
chrYCufflinks exon20492530 20492712 . + . gene\_id "XLOC\_058182"; transcript\_id "TCONS\_00095768"; exon\_number "3";  
oId "CUFF.104378.1"; tss\_id "TSS72891";  
chrYCufflinks exon21034387 21034720 . - . gene\_id "XLOC\_058219"; transcript\_id "TCONS\_00095824"; exon\_number "1";  
oId "CUFF.104381.4"; tss\_id "TSS72930";  
chrYCufflinks exon 21038954 21039091 . - . gene\_id "XLOC\_058219"; transcript\_id "TCONS\_00095824"; exon\_number  
"2"; oId "CUFF.104381.4"; tss\_id "TSS72930";  
chrY Cufflinks exon 21230610 21230684 . - . gene\_id "XLOC\_058219"; transcript\_id "TCONS\_00095824";  
exon\_number "3"; oId "CUFF.104381.4"; tss\_id "TSS72930";  
chrY Cufflinks exon 21238931 21239433 . - . gene\_id "XLOC\_058219"; transcript\_id "TCONS\_00095824";  
exon\_number "4"; oId "CUFF.104381.4"; tss\_id "TSS72930";  
chrY Cufflinks exon 21034387 21034720 . - . gene\_id "XLOC\_058219"; transcript\_id "TCONS\_00095823";  
exon\_number "1"; oId "CUFF.104381.3"; tss\_id "TSS72930";  
chrY Cufflinks exon 21038954 21039091 . - . gene\_id "XLOC\_058219"; transcript\_id "TCONS\_00095823";  
exon\_number "2"; oId "CUFF.104381.3"; tss\_id "TSS72930";  
chrY Cufflinks exon 21238931 21239433 . - . gene\_id "XLOC\_058219"; transcript\_id "TCONS\_00095823";  
exon\_number "3"; oId "CUFF.104381.3"; tss\_id "TSS72930";  
chrY Cufflinks exon 21034387 21034720 . - . gene\_id "XLOC\_058219"; transcript\_id "TCONS\_00095825";  
exon\_number "1"; oId "CUFF.104381.1"; tss\_id "TSS72930";  
chrY Cufflinks exon 21038954 21039091 . - . gene\_id "XLOC\_058219"; transcript\_id "TCONS\_00095825";  
exon\_number "2"; oId "CUFF.104381.1"; tss\_id "TSS72930";



chrY Cufflinks exon 21203256 21203472 . - . gene\_id "XLOC\_058219"; transcript\_id "TCONS\_00095825";  
exon\_number "3"; oId "CUFF.104381.1"; tss\_id "TSS72930";

chrY Cufflinks exon 21205049 21206581 . - . gene\_id "XLOC\_058219"; transcript\_id "TCONS\_00095825";  
exon\_number "4"; oId "CUFF.104381.1"; tss\_id "TSS72930";

chrY Cufflinks exon 21207128 21207177 . - . gene\_id "XLOC\_058219"; transcript\_id "TCONS\_00095825";  
exon\_number "5"; oId "CUFF.104381.1"; tss\_id "TSS72930";

chrY Cufflinks exon 21230610 21230684 . - . gene\_id "XLOC\_058219"; transcript\_id "TCONS\_00095825";  
exon\_number "6"; oId "CUFF.104381.1"; tss\_id "TSS72930";

chrY Cufflinks exon 21238931 21239457 . - . gene\_id "XLOC\_058219"; transcript\_id "TCONS\_00095825";  
exon\_number "7"; oId "CUFF.104381.1"; tss\_id "TSS72930";

chrY Cufflinks exon 21094585 21094727 . - . gene\_id "XLOC\_058219"; transcript\_id "TCONS\_00095834";  
exon\_number "1"; oId "CUFF.104381.6"; tss\_id "TSS72930";

chrY Cufflinks exon 21238931 21239433 . - . gene\_id "XLOC\_058219"; transcript\_id "TCONS\_00095834";  
exon\_number "2"; oId "CUFF.104381.6"; tss\_id "TSS72930";

chr1 Cufflinks exon 4844970 4846850 . + . gene\_id "XLOC\_000106"; transcript\_id "TCONS\_00000195"; exon\_number "1"; oId  
"CUFF.385.4"; tss\_id "TSS146";

chr1 Cufflinks exon 4851076 4852571 . + . gene\_id "XLOC\_000106"; transcript\_id "TCONS\_00000195"; exon\_number "2"; oId  
"CUFF.385.4"; tss\_id "TSS146";

chr1 Cufflinks exon 6977405 6977573 . + . gene\_id "XLOC\_000124"; transcript\_id "TCONS\_00000232"; exon\_number "1"; oId  
"CUFF.454.1"; tss\_id "TSS170";

chr1 Cufflinks exon 6978176 6979153 . + . gene\_id "XLOC\_000124"; transcript\_id "TCONS\_00000232"; exon\_number "2"; oId  
"CUFF.454.1"; tss\_id "TSS170";

chr1 Cufflinks exon 11538979 11539429 . + . gene\_id "XLOC\_000177"; transcript\_id "TCONS\_00000321";  
exon\_number "1"; oId "CUFF.646.3"; tss\_id "TSS235";

chr1 Cufflinks exon 11541315 11543618 . + . gene\_id "XLOC\_000177"; transcript\_id "TCONS\_00000321";  
exon\_number "2"; oId "CUFF.646.3"; tss\_id "TSS235";

chr1 Cufflinks exon 13813846 13814326 . + . gene\_id "XLOC\_000205"; transcript\_id "TCONS\_00000388";  
exon\_number "1"; oId "CUFF.726.2"; tss\_id "TSS277";

chr1 Cufflinks exon 13815191 13815293 . + . gene\_id "XLOC\_000205"; transcript\_id "TCONS\_00000388";  
exon\_number "2"; oId "CUFF.726.2"; tss\_id "TSS277";

chr1 Cufflinks exon 13815912 13816475 . + . gene\_id "XLOC\_000205"; transcript\_id "TCONS\_00000388";  
exon\_number "3"; oId "CUFF.726.2"; tss\_id "TSS277";

chr1 Cufflinks exon 13813861 13814326 . + . gene\_id "XLOC\_000205"; transcript\_id "TCONS\_00000389";  
exon\_number "1"; oId "CUFF.726.3"; tss\_id "TSS277";

chr1 Cufflinks exon 13815191 13815778 . + . gene\_id "XLOC\_000205"; transcript\_id "TCONS\_00000389";  
exon\_number "2"; oId "CUFF.726.3"; tss\_id "TSS277";

chr1 Cufflinks exon 26614571 26615209 . + . gene\_id "XLOC\_000418"; transcript\_id "TCONS\_00000727";  
exon\_number "1"; oId "CUFF.1372.2"; tss\_id "TSS536";

chr1 Cufflinks exon 26616090 26616189 . + . gene\_id "XLOC\_000418"; transcript\_id "TCONS\_00000727";  
exon\_number "2"; oId "CUFF.1372.2"; tss\_id "TSS536";

chr1 Cufflinks exon 26617449 26619015 . + . gene\_id "XLOC\_000418"; transcript\_id "TCONS\_00000727";  
exon\_number "3"; oId "CUFF.1372.2"; tss\_id "TSS536";

chr1 Cufflinks exon 33815687 33816048 . + . gene\_id "XLOC\_000552"; transcript\_id "TCONS\_00000968";

|                                                       |   |   |   |                                                        |  |
|-------------------------------------------------------|---|---|---|--------------------------------------------------------|--|
| exon_number "1"; oId "CUFF.1789.4"; tss_id "TSS712";  |   |   |   |                                                        |  |
| chr1 Cufflinks exon 33823296 33823354                 | . | + | . | gene_id "XLOC_000552"; transcript_id "TCONS_00000968"; |  |
| exon_number "2"; oId "CUFF.1789.4"; tss_id "TSS712";  |   |   |   |                                                        |  |
| chr1 Cufflinks exon 43889236 43889279                 | . | + | . | gene_id "XLOC_000671"; transcript_id "TCONS_00001204"; |  |
| exon_number "1"; oId "CUFF.2331.1"; tss_id "TSS869";  |   |   |   |                                                        |  |
| chr1 Cufflinks exon 43889405 43889790                 | . | + | . | gene_id "XLOC_000671"; transcript_id "TCONS_00001204"; |  |
| exon_number "2"; oId "CUFF.2331.1"; tss_id "TSS869";  |   |   |   |                                                        |  |
| chr1 Cufflinks exon 46598804 46598814                 | . | + | . | gene_id "XLOC_000712"; transcript_id "TCONS_00001296"; |  |
| exon_number "1"; oId "CUFF.2474.1"; tss_id "TSS924";  |   |   |   |                                                        |  |
| chr1 Cufflinks exon 46600203 46600326                 | . | + | . | gene_id "XLOC_000712"; transcript_id "TCONS_00001296"; |  |
| exon_number "2"; oId "CUFF.2474.1"; tss_id "TSS924";  |   |   |   |                                                        |  |
| chr1 Cufflinks exon 46601267 46601478                 | . | + | . | gene_id "XLOC_000712"; transcript_id "TCONS_00001296"; |  |
| exon_number "3"; oId "CUFF.2474.1"; tss_id "TSS924";  |   |   |   |                                                        |  |
| chr1 Cufflinks exon 46598867 46599062                 | . | + | . | gene_id "XLOC_000712"; transcript_id "TCONS_00001298"; |  |
| exon_number "1"; oId "CUFF.2474.3"; tss_id "TSS924";  |   |   |   |                                                        |  |
| chr1 Cufflinks exon 46600203 46600326                 | . | + | . | gene_id "XLOC_000712"; transcript_id "TCONS_00001298"; |  |
| exon_number "2"; oId "CUFF.2474.3"; tss_id "TSS924";  |   |   |   |                                                        |  |
| chr1 Cufflinks exon 46604544 46604752                 | . | + | . | gene_id "XLOC_000712"; transcript_id "TCONS_00001298"; |  |
| exon_number "3"; oId "CUFF.2474.3"; tss_id "TSS924";  |   |   |   |                                                        |  |
| chr1 Cufflinks exon 46599043 46599062                 | . | + | . | gene_id "XLOC_000712"; transcript_id "TCONS_00001299"; |  |
| exon_number "1"; oId "CUFF.2474.4"; tss_id "TSS925";  |   |   |   |                                                        |  |
| chr1 Cufflinks exon 46600203 46600326                 | . | + | . | gene_id "XLOC_000712"; transcript_id "TCONS_00001299"; |  |
| exon_number "2"; oId "CUFF.2474.4"; tss_id "TSS925";  |   |   |   |                                                        |  |
| chr1 Cufflinks exon 46604539 46604752                 | . | + | . | gene_id "XLOC_000712"; transcript_id "TCONS_00001299"; |  |
| exon_number "3"; oId "CUFF.2474.4"; tss_id "TSS925";  |   |   |   |                                                        |  |
| chr1 Cufflinks exon 57558177 57558262                 | . | + | . | gene_id "XLOC_000802"; transcript_id "TCONS_00001439"; |  |
| exon_number "1"; oId "CUFF.2843.1"; tss_id "TSS1032"; |   |   |   |                                                        |  |
| chr1 Cufflinks exon 57559979 57560155                 | . | + | . | gene_id "XLOC_000802"; transcript_id "TCONS_00001439"; |  |
| exon_number "2"; oId "CUFF.2843.1"; tss_id "TSS1032"; |   |   |   |                                                        |  |
| chr1 Cufflinks exon 57571518 57571654                 | . | + | . | gene_id "XLOC_000802"; transcript_id "TCONS_00001439"; |  |
| exon_number "3"; oId "CUFF.2843.1"; tss_id "TSS1032"; |   |   |   |                                                        |  |
| chr1 Cufflinks exon 57575956 57576070                 | . | + | . | gene_id "XLOC_000802"; transcript_id "TCONS_00001439"; |  |
| exon_number "4"; oId "CUFF.2843.1"; tss_id "TSS1032"; |   |   |   |                                                        |  |
| chr1 Cufflinks exon 57578067 57579372                 | . | + | . | gene_id "XLOC_000802"; transcript_id "TCONS_00001439"; |  |
| exon_number "5"; oId "CUFF.2843.1"; tss_id "TSS1032"; |   |   |   |                                                        |  |
| chr1 Cufflinks exon 64014641 64015044                 | . | + | . | gene_id "XLOC_000848"; transcript_id "TCONS_00001507"; |  |
| exon_number "1"; oId "CUFF.3060.1"; tss_id "TSS1087"; |   |   |   |                                                        |  |
| chr1 Cufflinks exon 64015160 64016681                 | . | + | . | gene_id "XLOC_000848"; transcript_id "TCONS_00001507"; |  |
| exon_number "2"; oId "CUFF.3060.1"; tss_id "TSS1087"; |   |   |   |                                                        |  |
| chr1 Cufflinks exon 79123519 79123734                 | . | + | . | gene_id "XLOC_000937"; transcript_id "TCONS_00001683"; |  |
| exon_number "1"; oId "CUFF.3446.6"; tss_id "TSS1213"; |   |   |   |                                                        |  |
| chr1 Cufflinks exon 79124997 79125168                 | . | + | . | gene_id "XLOC_000937"; transcript_id "TCONS_00001683"; |  |
| exon_number "2"; oId "CUFF.3446.6"; tss_id "TSS1213"; |   |   |   |                                                        |  |

|      |           |      |           |           |   |   |   |                                                                                                              |
|------|-----------|------|-----------|-----------|---|---|---|--------------------------------------------------------------------------------------------------------------|
| chr1 | Cufflinks | exon | 79127077  | 79128563  | . | + | . | gene_id "XLOC_000937"; transcript_id "TCONS_00001683"; exon_number "3"; oId "CUFF.3446.6"; tss_id "TSS1213"; |
| chr1 | Cufflinks | exon | 79129450  | 79129763  | . | + | . | gene_id "XLOC_000937"; transcript_id "TCONS_00001683"; exon_number "4"; oId "CUFF.3446.6"; tss_id "TSS1213"; |
| chr1 | Cufflinks | exon | 94057525  | 94058065  | . | + | . | gene_id "XLOC_001045"; transcript_id "TCONS_00001856"; exon_number "1"; oId "CUFF.3991.1"; tss_id "TSS1354"; |
| chr1 | Cufflinks | exon | 94059930  | 94060006  | . | + | . | gene_id "XLOC_001045"; transcript_id "TCONS_00001856"; exon_number "2"; oId "CUFF.3991.1"; tss_id "TSS1354"; |
| chr1 | Cufflinks | exon | 94064474  | 94064547  | . | + | . | gene_id "XLOC_001045"; transcript_id "TCONS_00001856"; exon_number "3"; oId "CUFF.3991.1"; tss_id "TSS1354"; |
| chr1 | Cufflinks | exon | 94064718  | 94065587  | . | + | . | gene_id "XLOC_001045"; transcript_id "TCONS_00001856"; exon_number "4"; oId "CUFF.3991.1"; tss_id "TSS1354"; |
| chr1 | Cufflinks | exon | 112019490 | 112019700 | . | + | . | gene_id "XLOC_001247"; transcript_id "TCONS_00002189"; exon_number "1"; oId "CUFF.4594.5"; tss_id "TSS1597"; |
| chr1 | Cufflinks | exon | 112020605 | 112021134 | . | + | . | gene_id "XLOC_001247"; transcript_id "TCONS_00002189"; exon_number "2"; oId "CUFF.4594.5"; tss_id "TSS1597"; |
| chr1 | Cufflinks | exon | 113663487 | 113663535 | . | + | . | gene_id "XLOC_001279"; transcript_id "TCONS_00002246"; exon_number "1"; oId "CUFF.4685.1"; tss_id "TSS1639"; |
| chr1 | Cufflinks | exon | 113664273 | 113664675 | . | + | . | gene_id "XLOC_001279"; transcript_id "TCONS_00002246"; exon_number "2"; oId "CUFF.4685.1"; tss_id "TSS1639"; |
| chr1 | Cufflinks | exon | 145013720 | 145013828 | . | + | . | gene_id "XLOC_001412"; transcript_id "TCONS_00002422"; exon_number "1"; oId "CUFF.5247.2"; tss_id "TSS1791"; |
| chr1 | Cufflinks | exon | 145017981 | 145018923 | . | + | . | gene_id "XLOC_001412"; transcript_id "TCONS_00002422"; exon_number "2"; oId "CUFF.5247.2"; tss_id "TSS1791"; |
| chr1 | Cufflinks | exon | 145013720 | 145013828 | . | + | . | gene_id "XLOC_001412"; transcript_id "TCONS_00002421"; exon_number "1"; oId "CUFF.5247.1"; tss_id "TSS1791"; |
| chr1 | Cufflinks | exon | 145016388 | 145016496 | . | + | . | gene_id "XLOC_001412"; transcript_id "TCONS_00002421"; exon_number "2"; oId "CUFF.5247.1"; tss_id "TSS1791"; |
| chr1 | Cufflinks | exon | 145017981 | 145018923 | . | + | . | gene_id "XLOC_001412"; transcript_id "TCONS_00002421"; exon_number "3"; oId "CUFF.5247.1"; tss_id "TSS1791"; |
| chr1 | Cufflinks | exon | 145068661 | 145068670 | . | + | . | gene_id "XLOC_001418"; transcript_id "TCONS_00002429"; exon_number "1"; oId "CUFF.5254.1"; tss_id "TSS1797"; |
| chr1 | Cufflinks | exon | 145292702 | 145293075 | . | + | . | gene_id "XLOC_001418"; transcript_id "TCONS_00002429"; exon_number "2"; oId "CUFF.5254.1"; tss_id "TSS1797"; |
| chr1 | Cufflinks | exon | 145297182 | 145297261 | . | + | . | gene_id "XLOC_001425"; transcript_id "TCONS_00002444"; exon_number "1"; oId "CUFF.5271.1"; tss_id "TSS1806"; |
| chr1 | Cufflinks | exon | 145303553 | 145303878 | . | + | . | gene_id "XLOC_001425"; transcript_id "TCONS_00002444"; exon_number "2"; oId "CUFF.5271.1"; tss_id "TSS1806"; |
| chr1 | Cufflinks | exon | 147400499 | 147400691 | . | + | . | gene_id "XLOC_001459"; transcript_id "TCONS_00002504"; exon_number "1"; oId "CUFF.5409.4"; tss_id "TSS1850"; |
| chr1 | Cufflinks | exon | 147408741 | 147408800 | . | + | . | gene_id "XLOC_001459"; transcript_id "TCONS_00002504"; exon_number "2"; oId "CUFF.5409.4"; tss_id "TSS1850"; |
| chr1 | Cufflinks | exon | 147410619 | 147410658 | . | + | . | gene_id "XLOC_001459"; transcript_id "TCONS_00002504"; exon_number "3";                                      |

oId "CUFF.5409.4"; tss\_id "TSS1850";  
chr1 Cufflinks exon147400506 147400691 . + . gene\_id "XLOC\_001459"; transcript\_id "TCONS\_00002507"; exon\_number "1";  
oId "CUFF.5409.9"; tss\_id "TSS1850";  
chr1 Cufflinks exon147401004 147401122 . + . gene\_id "XLOC\_001459"; transcript\_id "TCONS\_00002507"; exon\_number "2";  
oId "CUFF.5409.9"; tss\_id "TSS1850";  
chr1 Cufflinks exon147400506 147400691 . + . gene\_id "XLOC\_001459"; transcript\_id "TCONS\_00002506"; exon\_number "1";  
oId "CUFF.5409.10"; tss\_id "TSS1850";  
chr1 Cufflinks exon147400864 147401122 . + . gene\_id "XLOC\_001459"; transcript\_id "TCONS\_00002506"; exon\_number "2";  
oId "CUFF.5409.10"; tss\_id "TSS1850";  
chr1 Cufflinks exon147994146 147994529 . + . gene\_id "XLOC\_001467"; transcript\_id "TCONS\_00002522"; exon\_number "1";  
oId "CUFF.5443.1"; tss\_id "TSS1858";  
chr1 Cufflinks exon148241846 148242585 . + . gene\_id "XLOC\_001467"; transcript\_id "TCONS\_00002522"; exon\_number "2";  
oId "CUFF.5443.1"; tss\_id "TSS1858";  
chr1 Cufflinks exon148241465 148241653 . + . gene\_id "XLOC\_001467"; transcript\_id "TCONS\_00002526"; exon\_number "1";  
oId "CUFF.5443.4"; tss\_id "TSS1859";  
chr1 Cufflinks exon148247535 148247694 . + . gene\_id "XLOC\_001467"; transcript\_id "TCONS\_00002526"; exon\_number "2";  
oId "CUFF.5443.4"; tss\_id "TSS1859";  
chr1 Cufflinks exon154782091 154782207 . + . gene\_id "XLOC\_001607"; transcript\_id "TCONS\_00002769"; exon\_number "1";  
oId "CUFF.5903.1"; tss\_id "TSS2040";  
chr1 Cufflinks exon154783459 154783678 . + . gene\_id "XLOC\_001607"; transcript\_id "TCONS\_00002769"; exon\_number "2";  
oId "CUFF.5903.1"; tss\_id "TSS2040";  
chr1 Cufflinks exon154787295 154788014 . + . gene\_id "XLOC\_001607"; transcript\_id "TCONS\_00002769"; exon\_number "3";  
oId "CUFF.5903.1"; tss\_id "TSS2040";  
chr1 Cufflinks exon180145204 180145465 . + . gene\_id "XLOC\_001911"; transcript\_id "TCONS\_00003344"; exon\_number "1";  
oId "CUFF.7024.1"; tss\_id "TSS2417";  
chr1 Cufflinks exon180145524 180145578 . + . gene\_id "XLOC\_001911"; transcript\_id "TCONS\_00003344"; exon\_number "2";  
oId "CUFF.7024.1"; tss\_id "TSS2417";  
chr1 Cufflinks exon196716956 196717206 . + . gene\_id "XLOC\_002092"; transcript\_id "TCONS\_00003584"; exon\_number "1";  
oId "CUFF.7478.1"; tss\_id "TSS2615";  
chr1 Cufflinks exon196717261 196717281 . + . gene\_id "XLOC\_002092"; transcript\_id "TCONS\_00003584"; exon\_number "2";  
oId "CUFF.7478.1"; tss\_id "TSS2615";  
chr1 Cufflinks exon200993059 200993204 . + . gene\_id "XLOC\_002124"; transcript\_id "TCONS\_00003642"; exon\_number "1";  
oId "CUFF.7685.3"; tss\_id "TSS2656";  
chr1 Cufflinks exon200994632 200999675 . + . gene\_id "XLOC\_002124"; transcript\_id "TCONS\_00003642"; exon\_number "2";  
oId "CUFF.7685.3"; tss\_id "TSS2656";  
chr1 Cufflinks exon200993059 200993213 . + . gene\_id "XLOC\_002124"; transcript\_id "TCONS\_00003643"; exon\_number "1";  
oId "CUFF.7685.4"; tss\_id "TSS2656";  
chr1 Cufflinks exon200994550 200999675 . + . gene\_id "XLOC\_002124"; transcript\_id "TCONS\_00003643"; exon\_number "2";  
oId "CUFF.7685.4"; tss\_id "TSS2656";  
chr1 Cufflinks exon200993059 200993204 . + . gene\_id "XLOC\_002124"; transcript\_id "TCONS\_00003641"; exon\_number "1";  
oId "CUFF.7685.2"; tss\_id "TSS2656";  
chr1 Cufflinks exon200994550 200999675 . + . gene\_id "XLOC\_002124"; transcript\_id "TCONS\_00003641"; exon\_number "2";  
oId "CUFF.7685.2"; tss\_id "TSS2656";

chr1 Cufflinks exon200993059 200993213 . + . gene\_id "XLOC\_002124"; transcript\_id "TCONS\_00003640"; exon\_number "1";  
oId "CUFF.7685.1"; tss\_id "TSS2656";

chr1 Cufflinks exon200994632 200999675 . + . gene\_id "XLOC\_002124"; transcript\_id "TCONS\_00003640"; exon\_number "2";  
oId "CUFF.7685.1"; tss\_id "TSS2656";

chr1 Cufflinks exon200993104 200993205 . + . gene\_id "XLOC\_002124"; transcript\_id "TCONS\_00003645"; exon\_number "1";  
oId "CUFF.7685.6"; tss\_id "TSS2656";

chr1 Cufflinks exon200994550 200999675 . + . gene\_id "XLOC\_002124"; transcript\_id "TCONS\_00003645"; exon\_number "2";  
oId "CUFF.7685.6"; tss\_id "TSS2656";

chr1 Cufflinks exon200993104 200993205 . + . gene\_id "XLOC\_002124"; transcript\_id "TCONS\_00003644"; exon\_number "1";  
oId "CUFF.7685.5"; tss\_id "TSS2656";

chr1 Cufflinks exon200994632 200999675 . + . gene\_id "XLOC\_002124"; transcript\_id "TCONS\_00003644"; exon\_number "2";  
oId "CUFF.7685.5"; tss\_id "TSS2656";

chr1 Cufflinks exon245134136 245134771 . + . gene\_id "XLOC\_002670"; transcript\_id "TCONS\_00004521"; exon\_number "1";  
oId "CUFF.9308.1"; tss\_id "TSS3301";

chr1 Cufflinks exon245136591 245136951 . + . gene\_id "XLOC\_002670"; transcript\_id "TCONS\_00004521"; exon\_number "2";  
oId "CUFF.9308.1"; tss\_id "TSS3301";

chr1 Cufflinks exon249200408 249200541 . + . gene\_id "XLOC\_002721"; transcript\_id "TCONS\_00004587"; exon\_number "1";  
oId "CUFF.9501.1"; tss\_id "TSS3359";

chr1 Cufflinks exon249208015 249208078 . + . gene\_id "XLOC\_002721"; transcript\_id "TCONS\_00004587"; exon\_number "2";  
oId "CUFF.9501.1"; tss\_id "TSS3359";

chr1 Cufflinks exon249208638 249210388 . + . gene\_id "XLOC\_002721"; transcript\_id "TCONS\_00004587"; exon\_number "3";  
oId "CUFF.9501.1"; tss\_id "TSS3359";

chr1 Cufflinks exon1588831 1588948 . - . gene\_id "XLOC\_002802"; transcript\_id "TCONS\_00004722"; exon\_number "1"; oId  
"CUFF.206.1"; tss\_id "TSS3465";

chr1 Cufflinks exon1590375 1590613 . - . gene\_id "XLOC\_002802"; transcript\_id "TCONS\_00004722"; exon\_number "2"; oId  
"CUFF.206.1"; tss\_id "TSS3465";

chr1 Cufflinks exon2447502 2447522 . - . gene\_id "XLOC\_002839"; transcript\_id "TCONS\_00004789"; exon\_number "1"; oId  
"CUFF.288.1"; tss\_id "TSS3509";

chr1 Cufflinks exon2447575 2447771 . - . gene\_id "XLOC\_002839"; transcript\_id "TCONS\_00004789"; exon\_number "2"; oId  
"CUFF.288.1"; tss\_id "TSS3509";

chr1 Cufflinks exon16931965 16934186 . - . gene\_id "XLOC\_003006"; transcript\_id "TCONS\_00005075"; exon\_number "1";  
oId "CUFF.888.8"; tss\_id "TSS3727";

chr1 Cufflinks exon16935003 16935274 . - . gene\_id "XLOC\_003006"; transcript\_id "TCONS\_00005075"; exon\_number "2";  
oId "CUFF.888.8"; tss\_id "TSS3727";

chr1 Cufflinks exon16939833 16940100 . - . gene\_id "XLOC\_003006"; transcript\_id "TCONS\_00005075"; exon\_number "3";  
oId "CUFF.888.8"; tss\_id "TSS3727";

chr1 Cufflinks exon20990414 20991255 . - . gene\_id "XLOC\_003056"; transcript\_id "TCONS\_00005180"; exon\_number "1";  
oId "CUFF.1035.1"; tss\_id "TSS3809";

chr1 Cufflinks exon20992707 20992824 . - . gene\_id "XLOC\_003056"; transcript\_id "TCONS\_00005180"; exon\_number "2";  
oId "CUFF.1035.1"; tss\_id "TSS3809";

chr1 Cufflinks exon20993258 20993434 . - . gene\_id "XLOC\_003056"; transcript\_id "TCONS\_00005180"; exon\_number "3";  
oId "CUFF.1035.1"; tss\_id "TSS3809";

chr1 Cufflinks exon26351429 26351678 . - . gene\_id "XLOC\_003140"; transcript\_id "TCONS\_00005361"; exon\_number "1";

oId "CUFF.1340.2"; tss\_id "TSS3938";  
chr1 Cufflinks exon26354529 26354612 . - . gene\_id "XLOC\_003140"; transcript\_id "TCONS\_00005361"; exon\_number "2";  
oId "CUFF.1340.2"; tss\_id "TSS3938";  
chr1 Cufflinks exon26361403 26361619 . - . gene\_id "XLOC\_003140"; transcript\_id "TCONS\_00005361"; exon\_number "3";  
oId "CUFF.1340.2"; tss\_id "TSS3938";  
chr1 Cufflinks exon26351429 26351678 . - . gene\_id "XLOC\_003140"; transcript\_id "TCONS\_00005363"; exon\_number "1";  
oId "CUFF.1340.1"; tss\_id "TSS3939";  
chr1 Cufflinks exon26354529 26354615 . - . gene\_id "XLOC\_003140"; transcript\_id "TCONS\_00005363"; exon\_number "2";  
oId "CUFF.1340.1"; tss\_id "TSS3939";  
chr1 Cufflinks exon26361396 26361894 . - . gene\_id "XLOC\_003140"; transcript\_id "TCONS\_00005363"; exon\_number "3";  
oId "CUFF.1340.1"; tss\_id "TSS3939";  
chr1 Cufflinks exon26789248 26789361 . - . gene\_id "XLOC\_003150"; transcript\_id "TCONS\_00005389"; exon\_number "1";  
oId "CUFF.1393.1"; tss\_id "TSS3955";  
chr1 Cufflinks exon26789867 26789924 . - . gene\_id "XLOC\_003150"; transcript\_id "TCONS\_00005389"; exon\_number "2";  
oId "CUFF.1393.1"; tss\_id "TSS3955";  
chr1 Cufflinks exon26792695 26792815 . - . gene\_id "XLOC\_003150"; transcript\_id "TCONS\_00005389"; exon\_number "3";  
oId "CUFF.1393.1"; tss\_id "TSS3955";  
chr1 Cufflinks exon26793539 26794028 . - . gene\_id "XLOC\_003150"; transcript\_id "TCONS\_00005389"; exon\_number "4";  
oId "CUFF.1393.1"; tss\_id "TSS3955";  
chr1 Cufflinks exon28526790 28527881 . - . gene\_id "XLOC\_003187"; transcript\_id "TCONS\_00005455"; exon\_number "1";  
oId "CUFF.1514.2"; tss\_id "TSS4003";  
chr1 Cufflinks exon28530375 28530441 . - . gene\_id "XLOC\_003187"; transcript\_id "TCONS\_00005455"; exon\_number "2";  
oId "CUFF.1514.2"; tss\_id "TSS4003";  
chr1 Cufflinks exon39989057 39989369 . - . gene\_id "XLOC\_003323"; transcript\_id "TCONS\_00005729"; exon\_number "1";  
oId "CUFF.2047.6"; tss\_id "TSS4207";  
chr1 Cufflinks exon39989479 39989568 . - . gene\_id "XLOC\_003323"; transcript\_id "TCONS\_00005729"; exon\_number "2";  
oId "CUFF.2047.6"; tss\_id "TSS4207";  
chr1 Cufflinks exon39992580 39994289 . - . gene\_id "XLOC\_003323"; transcript\_id "TCONS\_00005729"; exon\_number "3";  
oId "CUFF.2047.6"; tss\_id "TSS4207";  
chr1 Cufflinks exon42312860 42314116 . - . gene\_id "XLOC\_003349"; transcript\_id "TCONS\_00005796"; exon\_number "1";  
oId "CUFF.2193.11"; tss\_id "TSS4248";  
chr1 Cufflinks exon42314542 42314760 . - . gene\_id "XLOC\_003349"; transcript\_id "TCONS\_00005796"; exon\_number "2";  
oId "CUFF.2193.11"; tss\_id "TSS4248";  
chr1 Cufflinks exon42384084 42384195 . - . gene\_id "XLOC\_003349"; transcript\_id "TCONS\_00005796"; exon\_number "3";  
oId "CUFF.2193.11"; tss\_id "TSS4248";  
chr1 Cufflinks exon42501478 42501596 . - . gene\_id "XLOC\_003349"; transcript\_id "TCONS\_00005796"; exon\_number "4";  
oId "CUFF.2193.11"; tss\_id "TSS4248";  
chr1 Cufflinks exon41987038 41987342 . - . gene\_id "XLOC\_003350"; transcript\_id "TCONS\_00005792"; exon\_number "1";  
oId "CUFF.2195.1"; tss\_id "TSS4249";  
chr1 Cufflinks exon41988206 41988269 . - . gene\_id "XLOC\_003350"; transcript\_id "TCONS\_00005792"; exon\_number "2";  
oId "CUFF.2195.1"; tss\_id "TSS4249";  
chr1 Cufflinks exon42307019 42307415 . - . gene\_id "XLOC\_003351"; transcript\_id "TCONS\_00005793"; exon\_number "1";  
oId "CUFF.2197.1"; tss\_id "TSS4250";

|                                      |          |   |   |   |                                                                         |
|--------------------------------------|----------|---|---|---|-------------------------------------------------------------------------|
| chr1 Cufflinks exon42312054          | 42312765 | . | - | . | gene_id "XLOC_003351"; transcript_id "TCONS_00005793"; exon_number "2"; |
| oId "CUFF.2197.1"; tss_id "TSS4250"; |          |   |   |   |                                                                         |
| chr1 Cufflinks exon42317378          | 42317629 | . | - | . | gene_id "XLOC_003354"; transcript_id "TCONS_00005797"; exon_number "1"; |
| oId "CUFF.2200.1"; tss_id "TSS4253"; |          |   |   |   |                                                                         |
| chr1 Cufflinks exon42459932          | 42459954 | . | - | . | gene_id "XLOC_003354"; transcript_id "TCONS_00005797"; exon_number "2"; |
| oId "CUFF.2200.1"; tss_id "TSS4253"; |          |   |   |   |                                                                         |
| chr1 Cufflinks exon42328907          | 42330419 | . | - | . | gene_id "XLOC_003355"; transcript_id "TCONS_00005798"; exon_number "1"; |
| oId "CUFF.2201.1"; tss_id "TSS4254"; |          |   |   |   |                                                                         |
| chr1 Cufflinks exon42331219          | 42331286 | . | - | . | gene_id "XLOC_003355"; transcript_id "TCONS_00005798"; exon_number "2"; |
| oId "CUFF.2201.1"; tss_id "TSS4254"; |          |   |   |   |                                                                         |
| chr1 Cufflinks exon42335218          | 42335301 | . | - | . | gene_id "XLOC_003355"; transcript_id "TCONS_00005798"; exon_number "3"; |
| oId "CUFF.2201.1"; tss_id "TSS4254"; |          |   |   |   |                                                                         |
| chr1 Cufflinks exon42336426          | 42336497 | . | - | . | gene_id "XLOC_003355"; transcript_id "TCONS_00005798"; exon_number "4"; |
| oId "CUFF.2201.1"; tss_id "TSS4254"; |          |   |   |   |                                                                         |
| chr1 Cufflinks exon44688267          | 44688321 | . | - | . | gene_id "XLOC_003399"; transcript_id "TCONS_00005866"; exon_number "1"; |
| oId "CUFF.2377.1"; tss_id "TSS4307"; |          |   |   |   |                                                                         |
| chr1 Cufflinks exon44691438          | 44691675 | . | - | . | gene_id "XLOC_003399"; transcript_id "TCONS_00005866"; exon_number "2"; |
| oId "CUFF.2377.1"; tss_id "TSS4307"; |          |   |   |   |                                                                         |
| chr1 Cufflinks exon44707587          | 44707752 | . | - | . | gene_id "XLOC_003399"; transcript_id "TCONS_00005866"; exon_number "3"; |
| oId "CUFF.2377.1"; tss_id "TSS4307"; |          |   |   |   |                                                                         |
| chr1 Cufflinks exon44709917          | 44709955 | . | - | . | gene_id "XLOC_003399"; transcript_id "TCONS_00005866"; exon_number "4"; |
| oId "CUFF.2377.1"; tss_id "TSS4307"; |          |   |   |   |                                                                         |
| chr1 Cufflinks exon44709048          | 44709669 | . | - | . | gene_id "XLOC_003399"; transcript_id "TCONS_00005867"; exon_number "1"; |
| oId "CUFF.2377.2"; tss_id "TSS4307"; |          |   |   |   |                                                                         |
| chr1 Cufflinks exon44709917          | 44709955 | . | - | . | gene_id "XLOC_003399"; transcript_id "TCONS_00005867"; exon_number "2"; |
| oId "CUFF.2377.2"; tss_id "TSS4307"; |          |   |   |   |                                                                         |
| chr1 Cufflinks exon46084993          | 46086105 | . | - | . | gene_id "XLOC_003425"; transcript_id "TCONS_00005907"; exon_number "1"; |
| oId "CUFF.2460.5"; tss_id "TSS4340"; |          |   |   |   |                                                                         |
| chr1 Cufflinks exon46086200          | 46086394 | . | - | . | gene_id "XLOC_003425"; transcript_id "TCONS_00005907"; exon_number "2"; |
| oId "CUFF.2460.5"; tss_id "TSS4340"; |          |   |   |   |                                                                         |
| chr1 Cufflinks exon52485803          | 52486684 | . | - | . | gene_id "XLOC_003478"; transcript_id "TCONS_00006020"; exon_number "1"; |
| oId "CUFF.2661.3"; tss_id "TSS4425"; |          |   |   |   |                                                                         |
| chr1 Cufflinks exon52489163          | 52489246 | . | - | . | gene_id "XLOC_003478"; transcript_id "TCONS_00006020"; exon_number "2"; |
| oId "CUFF.2661.3"; tss_id "TSS4425"; |          |   |   |   |                                                                         |
| chr1 Cufflinks exon52490182          | 52490251 | . | - | . | gene_id "XLOC_003478"; transcript_id "TCONS_00006020"; exon_number "3"; |
| oId "CUFF.2661.3"; tss_id "TSS4425"; |          |   |   |   |                                                                         |
| chr1 Cufflinks exon52492947          | 52493021 | . | - | . | gene_id "XLOC_003478"; transcript_id "TCONS_00006020"; exon_number "4"; |
| oId "CUFF.2661.3"; tss_id "TSS4425"; |          |   |   |   |                                                                         |
| chr1 Cufflinks exon52494250          | 52494304 | . | - | . | gene_id "XLOC_003478"; transcript_id "TCONS_00006020"; exon_number "5"; |
| oId "CUFF.2661.3"; tss_id "TSS4425"; |          |   |   |   |                                                                         |
| chr1 Cufflinks exon52496041          | 52496209 | . | - | . | gene_id "XLOC_003478"; transcript_id "TCONS_00006020"; exon_number "6"; |
| oId "CUFF.2661.3"; tss_id "TSS4425"; |          |   |   |   |                                                                         |
| chr1 Cufflinks exon53742979          | 53744116 | . | - | . | gene_id "XLOC_003497"; transcript_id "TCONS_00006070"; exon_number "1"; |

oId "CUFF.2732.1"; tss\_id "TSS4455";  
chr1 Cufflinks exon53745222 53745273 . - . gene\_id "XLOC\_003497"; transcript\_id "TCONS\_00006070"; exon\_number "2";  
oId "CUFF.2732.1"; tss\_id "TSS4455";  
chr1 Cufflinks exon59120411 59125827 . - . gene\_id "XLOC\_003573"; transcript\_id "TCONS\_00006189"; exon\_number "1";  
oId "CUFF.2917.2"; tss\_id "TSS4550";  
chr1 Cufflinks exon59126842 59126899 . - . gene\_id "XLOC\_003573"; transcript\_id "TCONS\_00006189"; exon\_number "2";  
oId "CUFF.2917.2"; tss\_id "TSS4550";  
chr1 Cufflinks exon59127078 59127183 . - . gene\_id "XLOC\_003573"; transcript\_id "TCONS\_00006189"; exon\_number "3";  
oId "CUFF.2917.2"; tss\_id "TSS4550";  
chr1 Cufflinks exon59129122 59129194 . - . gene\_id "XLOC\_003573"; transcript\_id "TCONS\_00006189"; exon\_number "4";  
oId "CUFF.2917.2"; tss\_id "TSS4550";  
chr1 Cufflinks exon67464930 67470131 . - . gene\_id "XLOC\_003638"; transcript\_id "TCONS\_00006288"; exon\_number "1";  
oId "CUFF.3165.2"; tss\_id "TSS4630";  
chr1 Cufflinks exon67474768 67474850 . - . gene\_id "XLOC\_003638"; transcript\_id "TCONS\_00006288"; exon\_number "2";  
oId "CUFF.3165.2"; tss\_id "TSS4630";  
chr1 Cufflinks exon67476152 67476209 . - . gene\_id "XLOC\_003638"; transcript\_id "TCONS\_00006288"; exon\_number "3";  
oId "CUFF.3165.2"; tss\_id "TSS4630";  
chr1 Cufflinks exon67477083 67477102 . - . gene\_id "XLOC\_003638"; transcript\_id "TCONS\_00006288"; exon\_number "4";  
oId "CUFF.3165.2"; tss\_id "TSS4630";  
chr1 Cufflinks exon85719790 85720184 . - . gene\_id "XLOC\_003757"; transcript\_id "TCONS\_00006463"; exon\_number "1";  
oId "CUFF.3563.1"; tss\_id "TSS4765";  
chr1 Cufflinks exon85722405 85722438 . - . gene\_id "XLOC\_003757"; transcript\_id "TCONS\_00006463"; exon\_number "2";  
oId "CUFF.3563.1"; tss\_id "TSS4765";  
chr1 Cufflinks exon86115106 86119781 . - . gene\_id "XLOC\_003775"; transcript\_id "TCONS\_00006485"; exon\_number "1";  
oId "CUFF.3592.2"; tss\_id "TSS4784";  
chr1 Cufflinks exon86123530 86123654 . - . gene\_id "XLOC\_003775"; transcript\_id "TCONS\_00006485"; exon\_number "2";  
oId "CUFF.3592.2"; tss\_id "TSS4784";  
chr1 Cufflinks exon86142919 86142996 . - . gene\_id "XLOC\_003775"; transcript\_id "TCONS\_00006485"; exon\_number "3";  
oId "CUFF.3592.2"; tss\_id "TSS4784";  
chr1 Cufflinks exon86144384 86144464 . - . gene\_id "XLOC\_003775"; transcript\_id "TCONS\_00006485"; exon\_number "4";  
oId "CUFF.3592.2"; tss\_id "TSS4784";  
chr1 Cufflinks exon86145056 86145114 . - . gene\_id "XLOC\_003775"; transcript\_id "TCONS\_00006485"; exon\_number "5";  
oId "CUFF.3592.2"; tss\_id "TSS4784";  
chr1 Cufflinks exon86139692 86140062 . - . gene\_id "XLOC\_003777"; transcript\_id "TCONS\_00006488"; exon\_number "1";  
oId "CUFF.3595.1"; tss\_id "TSS4787";  
chr1 Cufflinks exon86141802 86141883 . - . gene\_id "XLOC\_003777"; transcript\_id "TCONS\_00006488"; exon\_number "2";  
oId "CUFF.3595.1"; tss\_id "TSS4787";  
chr1 Cufflinks exon89475182 89475918 . - . gene\_id "XLOC\_003805"; transcript\_id "TCONS\_00006537"; exon\_number "1";  
oId "CUFF.3680.1"; tss\_id "TSS4819";  
chr1 Cufflinks exon89478635 89478762 . - . gene\_id "XLOC\_003805"; transcript\_id "TCONS\_00006537"; exon\_number "2";  
oId "CUFF.3680.1"; tss\_id "TSS4819";  
chr1 Cufflinks exon111196186 111202208 . - . gene\_id "XLOC\_004017"; transcript\_id "TCONS\_00006920"; exon\_number "1";  
oId "CUFF.4515.1"; tss\_id "TSS5103";



chr1 Cufflinks exon111210845 111210963 . - . gene\_id "XLOC\_004017"; transcript\_id "TCONS\_00006920"; exon\_number "2";  
oId "CUFF.4515.1"; tss\_id "TSS5103";

chr1 Cufflinks exon111214098 111214397 . - . gene\_id "XLOC\_004017"; transcript\_id "TCONS\_00006920"; exon\_number "3";  
oId "CUFF.4515.1"; tss\_id "TSS5103";

chr1 Cufflinks exon144833251 144833621 . - . gene\_id "XLOC\_004198"; transcript\_id "TCONS\_00007185"; exon\_number "1";  
oId "CUFF.5229.1"; tss\_id "TSS5317";

chr1 Cufflinks exon144835453 144835862 . - . gene\_id "XLOC\_004198"; transcript\_id "TCONS\_00007185"; exon\_number "2";  
oId "CUFF.5229.1"; tss\_id "TSS5317";

chr1 Cufflinks exon145475740 145476081 . - . gene\_id "XLOC\_004212"; transcript\_id "TCONS\_00007208"; exon\_number "1";  
oId "CUFF.5306.1"; tss\_id "TSS5335";

chr1 Cufflinks exon145476719 145476863 . - . gene\_id "XLOC\_004212"; transcript\_id "TCONS\_00007208"; exon\_number "2";  
oId "CUFF.5306.1"; tss\_id "TSS5335";

chr1 Cufflinks exon147744100 147744165 . - . gene\_id "XLOC\_004258"; transcript\_id "TCONS\_00007286"; exon\_number "1";  
oId "CUFF.5423.1"; tss\_id "TSS5387";

chr1 Cufflinks exon147931724 147932319 . - . gene\_id "XLOC\_004258"; transcript\_id "TCONS\_00007286"; exon\_number "2";  
oId "CUFF.5423.1"; tss\_id "TSS5387";

chr1 Cufflinks exon147805383 147805403 . - . gene\_id "XLOC\_004260"; transcript\_id "TCONS\_00007288"; exon\_number "1";  
oId "CUFF.5430.1"; tss\_id "TSS5389";

chr1 Cufflinks exon147806020 147807094 . - . gene\_id "XLOC\_004260"; transcript\_id "TCONS\_00007288"; exon\_number "2";  
oId "CUFF.5430.1"; tss\_id "TSS5389";

chr1 Cufflinks exon154719997 154720164 . - . gene\_id "XLOC\_004425"; transcript\_id "TCONS\_00007544"; exon\_number "1";  
oId "CUFF.5902.1"; tss\_id "TSS5595";

chr1 Cufflinks exon154720485 154720599 . - . gene\_id "XLOC\_004425"; transcript\_id "TCONS\_00007544"; exon\_number "2";  
oId "CUFF.5902.1"; tss\_id "TSS5595";

chr1 Cufflinks exon155201061 155203319 . - . gene\_id "XLOC\_004453"; transcript\_id "TCONS\_00007589"; exon\_number "1";  
oId "CUFF.5964.1"; tss\_id "TSS5625";

chr1 Cufflinks exon155203882 155203913 . - . gene\_id "XLOC\_004453"; transcript\_id "TCONS\_00007589"; exon\_number "2";  
oId "CUFF.5964.1"; tss\_id "TSS5625";

chr1 Cufflinks exon156374044 156374393 . - . gene\_id "XLOC\_004486"; transcript\_id "TCONS\_00007652"; exon\_number "1";  
oId "CUFF.6106.4"; tss\_id "TSS5668";

chr1 Cufflinks exon156384446 156384545 . - . gene\_id "XLOC\_004486"; transcript\_id "TCONS\_00007652"; exon\_number "2";  
oId "CUFF.6106.4"; tss\_id "TSS5668";

chr1 Cufflinks exon156389963 156390066 . - . gene\_id "XLOC\_004486"; transcript\_id "TCONS\_00007652"; exon\_number "3";  
oId "CUFF.6106.4"; tss\_id "TSS5668";

chr1 Cufflinks exon156374044 156374393 . - . gene\_id "XLOC\_004486"; transcript\_id "TCONS\_00007656"; exon\_number "1";  
oId "CUFF.6106.6"; tss\_id "TSS5669";

chr1 Cufflinks exon156384446 156384545 . - . gene\_id "XLOC\_004486"; transcript\_id "TCONS\_00007656"; exon\_number "2";  
oId "CUFF.6106.6"; tss\_id "TSS5669";

chr1 Cufflinks exon156391347 156391577 . - . gene\_id "XLOC\_004486"; transcript\_id "TCONS\_00007656"; exon\_number "3";  
oId "CUFF.6106.6"; tss\_id "TSS5669";

chr1 Cufflinks exon156374044 156374393 . - . gene\_id "XLOC\_004486"; transcript\_id "TCONS\_00007655"; exon\_number "1";  
oId "CUFF.6106.5"; tss\_id "TSS5669";

chr1 Cufflinks exon156391347 156391577 . - . gene\_id "XLOC\_004486"; transcript\_id "TCONS\_00007655"; exon\_number "2";

oId "CUFF.6106.5"; tss\_id "TSS5669";  
chr1 Cufflinks exon156383219 156384090 . - . gene\_id "XLOC\_004486"; transcript\_id "TCONS\_00007665"; exon\_number "1";  
oId "CUFF.6106.7"; tss\_id "TSS5668";  
chr1 Cufflinks exon156384446 156384545 . - . gene\_id "XLOC\_004486"; transcript\_id "TCONS\_00007665"; exon\_number "2";  
oId "CUFF.6106.7"; tss\_id "TSS5668";  
chr1 Cufflinks exon156389963 156390126 . - . gene\_id "XLOC\_004486"; transcript\_id "TCONS\_00007665"; exon\_number "3";  
oId "CUFF.6106.7"; tss\_id "TSS5668";  
chr1 Cufflinks exon172362364 172363550 . - . gene\_id "XLOC\_004717"; transcript\_id "TCONS\_00008087"; exon\_number "1";  
oId "CUFF.6842.1"; tss\_id "TSS5978";  
chr1 Cufflinks exon172366304 172366344 . - . gene\_id "XLOC\_004717"; transcript\_id "TCONS\_00008087"; exon\_number "2";  
oId "CUFF.6842.1"; tss\_id "TSS5978";  
chr1 Cufflinks exon172362364 172363550 . - . gene\_id "XLOC\_004717"; transcript\_id "TCONS\_00008088"; exon\_number "1";  
oId "CUFF.6842.2"; tss\_id "TSS5979";  
chr1 Cufflinks exon172368959 172369054 . - . gene\_id "XLOC\_004717"; transcript\_id "TCONS\_00008088"; exon\_number "2";  
oId "CUFF.6842.2"; tss\_id "TSS5979";  
chr1 Cufflinks exon241786433 241787532 . - . gene\_id "XLOC\_005349"; transcript\_id "TCONS\_00009181"; exon\_number "1";  
oId "CUFF.9224.1"; tss\_id "TSS6805";  
chr1 Cufflinks exon241787597 241788771 . - . gene\_id "XLOC\_005349"; transcript\_id "TCONS\_00009181"; exon\_number "2";  
oId "CUFF.9224.1"; tss\_id "TSS6805";  
chr1 Cufflinks exon247461590 247464578 . - . gene\_id "XLOC\_005407"; transcript\_id "TCONS\_00009283"; exon\_number "1";  
oId "CUFF.9439.5"; tss\_id "TSS6876";  
chr1 Cufflinks exon247468323 247468365 . - . gene\_id "XLOC\_005407"; transcript\_id "TCONS\_00009283"; exon\_number "2";  
oId "CUFF.9439.5"; tss\_id "TSS6876";  
chr1 Cufflinks exon247461590 247464578 . - . gene\_id "XLOC\_005407"; transcript\_id "TCONS\_00009284"; exon\_number "1";  
oId "CUFF.9439.3"; tss\_id "TSS6877";  
chr1 Cufflinks exon247468550 247468567 . - . gene\_id "XLOC\_005407"; transcript\_id "TCONS\_00009284"; exon\_number "2";  
oId "CUFF.9439.3"; tss\_id "TSS6877";  
chr1 Cufflinks exon247461590 247464578 . - . gene\_id "XLOC\_005407"; transcript\_id "TCONS\_00009285"; exon\_number "1";  
oId "CUFF.9439.1"; tss\_id "TSS6878";  
chr1 Cufflinks exon247464676 247464744 . - . gene\_id "XLOC\_005407"; transcript\_id "TCONS\_00009285"; exon\_number "2";  
oId "CUFF.9439.1"; tss\_id "TSS6878";  
chr1 Cufflinks exon247471237 247471247 . - . gene\_id "XLOC\_005407"; transcript\_id "TCONS\_00009285"; exon\_number "3";  
oId "CUFF.9439.1"; tss\_id "TSS6878";  
chr10 Cufflinks exon13694895 13694929 . + . gene\_id "XLOC\_005574"; transcript\_id "TCONS\_00009538"; exon\_number  
"1"; oId "CUFF.9943.5"; tss\_id "TSS7072";  
chr10 Cufflinks exon13696353 13696427 . + . gene\_id "XLOC\_005574"; transcript\_id "TCONS\_00009538"; exon\_number  
"2"; oId "CUFF.9943.5"; tss\_id "TSS7072";  
chr10 Cufflinks exon13697378 13697935 . + . gene\_id "XLOC\_005574"; transcript\_id "TCONS\_00009538"; exon\_number  
"3"; oId "CUFF.9943.5"; tss\_id "TSS7072";  
chr10 Cufflinks exon31676053 31676195 . + . gene\_id "XLOC\_005771"; transcript\_id "TCONS\_00009833"; exon\_number  
"1"; oId "CUFF.10556.1"; tss\_id "TSS7298";  
chr10 Cufflinks exon31676649 31676727 . + . gene\_id "XLOC\_005771"; transcript\_id "TCONS\_00009833"; exon\_number  
"2"; oId "CUFF.10556.1"; tss\_id "TSS7298";

|       |                        |          |   |   |   |                                                                                                               |
|-------|------------------------|----------|---|---|---|---------------------------------------------------------------------------------------------------------------|
| chr10 | Cufflinks exon47913664 | 47913703 | . | + | . | gene_id "XLOC_005880"; transcript_id "TCONS_00010038"; exon_number "1"; oId "CUFF.10980.2"; tss_id "TSS7442"; |
| chr10 | Cufflinks exon47915878 | 47915964 | . | + | . | gene_id "XLOC_005880"; transcript_id "TCONS_00010038"; exon_number "2"; oId "CUFF.10980.2"; tss_id "TSS7442"; |
| chr10 | Cufflinks exon47919942 | 47920043 | . | + | . | gene_id "XLOC_005880"; transcript_id "TCONS_00010038"; exon_number "3"; oId "CUFF.10980.2"; tss_id "TSS7442"; |
| chr10 | Cufflinks exon47922235 | 47922366 | . | + | . | gene_id "XLOC_005880"; transcript_id "TCONS_00010038"; exon_number "4"; oId "CUFF.10980.2"; tss_id "TSS7442"; |
| chr10 | Cufflinks exon47923534 | 47923644 | . | + | . | gene_id "XLOC_005880"; transcript_id "TCONS_00010038"; exon_number "5"; oId "CUFF.10980.2"; tss_id "TSS7442"; |
| chr10 | Cufflinks exon51623432 | 51623901 | . | + | . | gene_id "XLOC_005928"; transcript_id "TCONS_00010116"; exon_number "1"; oId "CUFF.11130.1"; tss_id "TSS7504"; |
| chr10 | Cufflinks exon51625564 | 51625587 | . | + | . | gene_id "XLOC_005928"; transcript_id "TCONS_00010116"; exon_number "2"; oId "CUFF.11130.1"; tss_id "TSS7504"; |
| chr10 | Cufflinks exon52499593 | 52499743 | . | + | . | gene_id "XLOC_005943"; transcript_id "TCONS_00010139"; exon_number "1"; oId "CUFF.11172.2"; tss_id "TSS7521"; |
| chr10 | Cufflinks exon52502675 | 52503617 | . | + | . | gene_id "XLOC_005943"; transcript_id "TCONS_00010139"; exon_number "2"; oId "CUFF.11172.2"; tss_id "TSS7521"; |
| chr10 | Cufflinks exon60094739 | 60094985 | . | + | . | gene_id "XLOC_005961"; transcript_id "TCONS_00010164"; exon_number "1"; oId "CUFF.11223.4"; tss_id "TSS7540"; |
| chr10 | Cufflinks exon60104281 | 60104334 | . | + | . | gene_id "XLOC_005961"; transcript_id "TCONS_00010164"; exon_number "2"; oId "CUFF.11223.4"; tss_id "TSS7540"; |
| chr10 | Cufflinks exon63519394 | 63519939 | . | + | . | gene_id "XLOC_005968"; transcript_id "TCONS_00010179"; exon_number "1"; oId "CUFF.11251.2"; tss_id "TSS7551"; |
| chr10 | Cufflinks exon63520621 | 63520761 | . | + | . | gene_id "XLOC_005968"; transcript_id "TCONS_00010179"; exon_number "2"; oId "CUFF.11251.2"; tss_id "TSS7551"; |
| chr10 | Cufflinks exon63525697 | 63526223 | . | + | . | gene_id "XLOC_005968"; transcript_id "TCONS_00010179"; exon_number "3"; oId "CUFF.11251.2"; tss_id "TSS7551"; |
| chr10 | Cufflinks exon89578058 | 89578471 | . | + | . | gene_id "XLOC_006160"; transcript_id "TCONS_00010541"; exon_number "1"; oId "CUFF.11941.2"; tss_id "TSS7816"; |
| chr10 | Cufflinks exon89578659 | 89580838 | . | + | . | gene_id "XLOC_006160"; transcript_id "TCONS_00010541"; exon_number "2"; oId "CUFF.11941.2"; tss_id "TSS7816"; |
| chr10 | Cufflinks exon89638049 | 89638109 | . | + | . | gene_id "XLOC_006164"; transcript_id "TCONS_00010550"; exon_number "1"; oId "CUFF.11955.5"; tss_id "TSS7824"; |
| chr10 | Cufflinks exon89638683 | 89638780 | . | + | . | gene_id "XLOC_006164"; transcript_id "TCONS_00010550"; exon_number "2"; oId "CUFF.11955.5"; tss_id "TSS7824"; |
| chr10 | Cufflinks exon89640057 | 89640195 | . | + | . | gene_id "XLOC_006164"; transcript_id "TCONS_00010550"; exon_number "3"; oId "CUFF.11955.5"; tss_id "TSS7824"; |
| chr10 | Cufflinks exon89682220 | 89682297 | . | + | . | gene_id "XLOC_006164"; transcript_id "TCONS_00010550"; exon_number "4"; oId "CUFF.11955.5"; tss_id "TSS7824"; |
| chr10 | Cufflinks exon89826597 | 89826610 | . | + | . | gene_id "XLOC_006166"; transcript_id "TCONS_00010554"; exon_number "1"; oId "CUFF.11961.2"; tss_id "TSS7828"; |
| chr10 | Cufflinks exon89892184 | 89892310 | . | + | . | gene_id "XLOC_006166"; transcript_id "TCONS_00010554"; exon_number "1"; oId "CUFF.11961.2"; tss_id "TSS7828"; |

|                                                                                       |   |   |   |                                                                    |
|---------------------------------------------------------------------------------------|---|---|---|--------------------------------------------------------------------|
| "2"; oId "CUFF.11961.2"; tss_id "TSS7828";<br>chr10 Cufflinks exon90129836 90129937   | . | + | . | gene_id "XLOC_006166"; transcript_id "TCONS_00010554"; exon_number |
| "3"; oId "CUFF.11961.2"; tss_id "TSS7828";<br>chr10 Cufflinks exon90133877 90137683   | . | + | . | gene_id "XLOC_006166"; transcript_id "TCONS_00010554"; exon_number |
| "4"; oId "CUFF.11961.2"; tss_id "TSS7828";<br>chr10 Cufflinks exon91526307 91526329   | . | + | . | gene_id "XLOC_006213"; transcript_id "TCONS_00010610"; exon_number |
| "1"; oId "CUFF.12093.3"; tss_id "TSS7880";<br>chr10 Cufflinks exon91528047 91528148   | . | + | . | gene_id "XLOC_006213"; transcript_id "TCONS_00010610"; exon_number |
| "2"; oId "CUFF.12093.3"; tss_id "TSS7880";<br>chr10 Cufflinks exon91528495 91528645   | . | + | . | gene_id "XLOC_006213"; transcript_id "TCONS_00010610"; exon_number |
| "3"; oId "CUFF.12093.3"; tss_id "TSS7880";<br>chr10 Cufflinks exon91532446 91532588   | . | + | . | gene_id "XLOC_006213"; transcript_id "TCONS_00010610"; exon_number |
| "4"; oId "CUFF.12093.3"; tss_id "TSS7880";<br>chr10 Cufflinks exon91533728 91534714   | . | + | . | gene_id "XLOC_006213"; transcript_id "TCONS_00010610"; exon_number |
| "5"; oId "CUFF.12093.3"; tss_id "TSS7880";<br>chr10 Cufflinks exon92980359 92980593   | . | + | . | gene_id "XLOC_006225"; transcript_id "TCONS_00010633"; exon_number |
| "1"; oId "CUFF.12132.3"; tss_id "TSS7896";<br>chr10 Cufflinks exon92982446 92982740   | . | + | . | gene_id "XLOC_006225"; transcript_id "TCONS_00010633"; exon_number |
| "2"; oId "CUFF.12132.3"; tss_id "TSS7896";<br>chr10 Cufflinks exon92987094 92987717   | . | + | . | gene_id "XLOC_006225"; transcript_id "TCONS_00010633"; exon_number |
| "3"; oId "CUFF.12132.3"; tss_id "TSS7896";<br>chr10 Cufflinks exon98115459 98115470   | . | + | . | gene_id "XLOC_006287"; transcript_id "TCONS_00010735"; exon_number |
| "1"; oId "CUFF.12354.1"; tss_id "TSS7971";<br>chr10 Cufflinks exon98116204 98116533   | . | + | . | gene_id "XLOC_006287"; transcript_id "TCONS_00010735"; exon_number |
| "2"; oId "CUFF.12354.1"; tss_id "TSS7971";<br>chr10 Cufflinks exon122216466 122216873 | . | + | . | gene_id "XLOC_006533"; transcript_id "TCONS_00011153"; exon_number |
| "1"; oId "CUFF.13092.3"; tss_id "TSS8282";<br>chr10 Cufflinks exon122263330 122263438 | . | + | . | gene_id "XLOC_006533"; transcript_id "TCONS_00011153"; exon_number |
| "2"; oId "CUFF.13092.3"; tss_id "TSS8282";<br>chr10 Cufflinks exon122348815 122349440 | . | + | . | gene_id "XLOC_006533"; transcript_id "TCONS_00011153"; exon_number |
| "3"; oId "CUFF.13092.3"; tss_id "TSS8282";<br>chr10 Cufflinks exon134259282 134259284 | . | + | . | gene_id "XLOC_006689"; transcript_id "TCONS_00011391"; exon_number |
| "1"; oId "CUFF.13530.2"; tss_id "TSS8470";<br>chr10 Cufflinks exon134261242 134262284 | . | + | . | gene_id "XLOC_006689"; transcript_id "TCONS_00011391"; exon_number |
| "2"; oId "CUFF.13530.2"; tss_id "TSS8470";<br>chr10 Cufflinks exon134259285 134259288 | . | + | . | gene_id "XLOC_006689"; transcript_id "TCONS_00011392"; exon_number |
| "1"; oId "CUFF.13530.3"; tss_id "TSS8470";<br>chr10 Cufflinks exon134261246 134262284 | . | + | . | gene_id "XLOC_006689"; transcript_id "TCONS_00011392"; exon_number |
| "2"; oId "CUFF.13530.3"; tss_id "TSS8470";<br>chr10 Cufflinks exon134260498 134260582 | . | + | . | gene_id "XLOC_006689"; transcript_id "TCONS_00011394"; exon_number |
| "1"; oId "CUFF.13530.5"; tss_id "TSS8471";<br>chr10 Cufflinks exon134261241 134262284 | . | + | . | gene_id "XLOC_006689"; transcript_id "TCONS_00011394"; exon_number |
| "2"; oId "CUFF.13530.5"; tss_id "TSS8471";                                            | . | + | . | gene_id "XLOC_006689"; transcript_id "TCONS_00011394"; exon_number |

|       |                         |           |   |   |   |                                                                                                               |
|-------|-------------------------|-----------|---|---|---|---------------------------------------------------------------------------------------------------------------|
| chr10 | Cufflinks exon134260595 | 134260613 | . | + | . | gene_id "XLOC_006689"; transcript_id "TCONS_00011395"; exon_number "1"; oId "CUFF.13530.6"; tss_id "TSS8471"; |
| chr10 | Cufflinks exon134260803 | 134262284 | . | + | . | gene_id "XLOC_006689"; transcript_id "TCONS_00011395"; exon_number "2"; oId "CUFF.13530.6"; tss_id "TSS8471"; |
| chr10 | Cufflinks exon134260711 | 134261012 | . | + | . | gene_id "XLOC_006689"; transcript_id "TCONS_00011396"; exon_number "1"; oId "CUFF.13530.7"; tss_id "TSS8472"; |
| chr10 | Cufflinks exon134261241 | 134262284 | . | + | . | gene_id "XLOC_006689"; transcript_id "TCONS_00011396"; exon_number "2"; oId "CUFF.13530.7"; tss_id "TSS8472"; |
| chr10 | Cufflinks exon7398773   | 7400029   | . | - | . | gene_id "XLOC_006826"; transcript_id "TCONS_00011614"; exon_number "1"; oId "CUFF.9793.1"; tss_id "TSS8637";  |
| chr10 | Cufflinks exon7400201   | 7400234   | . | - | . | gene_id "XLOC_006826"; transcript_id "TCONS_00011614"; exon_number "2"; oId "CUFF.9793.1"; tss_id "TSS8637";  |
| chr10 | Cufflinks exon12627567  | 12628442  | . | - | . | gene_id "XLOC_006857"; transcript_id "TCONS_00011668"; exon_number "1"; oId "CUFF.9915.1"; tss_id "TSS8679";  |
| chr10 | Cufflinks exon12628703  | 12628749  | . | - | . | gene_id "XLOC_006857"; transcript_id "TCONS_00011668"; exon_number "2"; oId "CUFF.9915.1"; tss_id "TSS8679";  |
| chr10 | Cufflinks exon12627567  | 12628442  | . | - | . | gene_id "XLOC_006857"; transcript_id "TCONS_00011669"; exon_number "1"; oId "CUFF.9915.2"; tss_id "TSS8680";  |
| chr10 | Cufflinks exon12629031  | 12629089  | . | - | . | gene_id "XLOC_006857"; transcript_id "TCONS_00011669"; exon_number "2"; oId "CUFF.9915.2"; tss_id "TSS8680";  |
| chr10 | Cufflinks exon20010775  | 20011154  | . | - | . | gene_id "XLOC_006923"; transcript_id "TCONS_00011786"; exon_number "1"; oId "CUFF.10112.2"; tss_id "TSS8769"; |
| chr10 | Cufflinks exon20011259  | 20011351  | . | - | . | gene_id "XLOC_006923"; transcript_id "TCONS_00011786"; exon_number "2"; oId "CUFF.10112.2"; tss_id "TSS8769"; |
| chr10 | Cufflinks exon20013856  | 20013910  | . | - | . | gene_id "XLOC_006923"; transcript_id "TCONS_00011786"; exon_number "3"; oId "CUFF.10112.2"; tss_id "TSS8769"; |
| chr10 | Cufflinks exon20017334  | 20017575  | . | - | . | gene_id "XLOC_006923"; transcript_id "TCONS_00011786"; exon_number "4"; oId "CUFF.10112.2"; tss_id "TSS8769"; |
| chr10 | Cufflinks exon20010775  | 20011154  | . | - | . | gene_id "XLOC_006923"; transcript_id "TCONS_00011785"; exon_number "1"; oId "CUFF.10112.1"; tss_id "TSS8769"; |
| chr10 | Cufflinks exon20011259  | 20011351  | . | - | . | gene_id "XLOC_006923"; transcript_id "TCONS_00011785"; exon_number "2"; oId "CUFF.10112.1"; tss_id "TSS8769"; |
| chr10 | Cufflinks exon20017334  | 20017575  | . | - | . | gene_id "XLOC_006923"; transcript_id "TCONS_00011785"; exon_number "3"; oId "CUFF.10112.1"; tss_id "TSS8769"; |
| chr10 | Cufflinks exon72976981  | 72977392  | . | - | . | gene_id "XLOC_007306"; transcript_id "TCONS_00012472"; exon_number "1"; oId "CUFF.11460.2"; tss_id "TSS9266"; |
| chr10 | Cufflinks exon72977714  | 72977733  | . | - | . | gene_id "XLOC_007306"; transcript_id "TCONS_00012472"; exon_number "2"; oId "CUFF.11460.2"; tss_id "TSS9266"; |
| chr10 | Cufflinks exon72976981  | 72977392  | . | - | . | gene_id "XLOC_007306"; transcript_id "TCONS_00012473"; exon_number "1"; oId "CUFF.11460.3"; tss_id "TSS9267"; |
| chr10 | Cufflinks exon72977751  | 72977985  | . | - | . | gene_id "XLOC_007306"; transcript_id "TCONS_00012473"; exon_number "2"; oId "CUFF.11460.3"; tss_id "TSS9267"; |
| chr10 | Cufflinks exon81442309  | 81445139  | . | - | . | gene_id "XLOC_007392"; transcript_id "TCONS_00012619"; exon_number "1"; oId "CUFF.11460.4"; tss_id "TSS9268"; |

|                                            |                        |          |   |   |                                                                    |
|--------------------------------------------|------------------------|----------|---|---|--------------------------------------------------------------------|
| "1"; oId "CUFF.11764.1"; tss_id "TSS9379"; |                        |          |   |   |                                                                    |
| chr10                                      | Cufflinks exon81446038 | 81446217 | . | - | .                                                                  |
| "2"; oId "CUFF.11764.1"; tss_id "TSS9379"; |                        |          |   |   | gene_id "XLOC_007392"; transcript_id "TCONS_00012619"; exon_number |
| chr10                                      | Cufflinks exon81451378 | 81451812 | . | - | .                                                                  |
| "3"; oId "CUFF.11764.1"; tss_id "TSS9379"; |                        |          |   |   | gene_id "XLOC_007392"; transcript_id "TCONS_00012619"; exon_number |
| chr10                                      | Cufflinks exon81526027 | 81526081 | . | - | .                                                                  |
| "4"; oId "CUFF.11764.1"; tss_id "TSS9379"; |                        |          |   |   | gene_id "XLOC_007392"; transcript_id "TCONS_00012619"; exon_number |
| chr10                                      | Cufflinks exon81564242 | 81564284 | . | - | .                                                                  |
| "5"; oId "CUFF.11764.1"; tss_id "TSS9379"; |                        |          |   |   | gene_id "XLOC_007392"; transcript_id "TCONS_00012619"; exon_number |
| chr10                                      | Cufflinks exon81565796 | 81565878 | . | - | .                                                                  |
| "6"; oId "CUFF.11764.1"; tss_id "TSS9379"; |                        |          |   |   | gene_id "XLOC_007392"; transcript_id "TCONS_00012619"; exon_number |
| chr10                                      | Cufflinks exon81568519 | 81568589 | . | - | .                                                                  |
| "7"; oId "CUFF.11764.1"; tss_id "TSS9379"; |                        |          |   |   | gene_id "XLOC_007392"; transcript_id "TCONS_00012619"; exon_number |
| chr10                                      | Cufflinks exon81574370 | 81574472 | . | - | .                                                                  |
| "8"; oId "CUFF.11764.1"; tss_id "TSS9379"; |                        |          |   |   | gene_id "XLOC_007392"; transcript_id "TCONS_00012619"; exon_number |
| chr10                                      | Cufflinks exon81585954 | 81586353 | . | - | .                                                                  |
| "9"; oId "CUFF.11764.1"; tss_id "TSS9379"; |                        |          |   |   | gene_id "XLOC_007392"; transcript_id "TCONS_00012619"; exon_number |
| chr10                                      | Cufflinks exon81451256 | 81451812 | . | - | .                                                                  |
| "1"; oId "CUFF.11764.3"; tss_id "TSS9379"; |                        |          |   |   | gene_id "XLOC_007392"; transcript_id "TCONS_00012622"; exon_number |
| chr10                                      | Cufflinks exon81526027 | 81526080 | . | - | .                                                                  |
| "2"; oId "CUFF.11764.3"; tss_id "TSS9379"; |                        |          |   |   | gene_id "XLOC_007392"; transcript_id "TCONS_00012622"; exon_number |
| chr10                                      | Cufflinks exon81564241 | 81564283 | . | - | .                                                                  |
| "3"; oId "CUFF.11764.3"; tss_id "TSS9379"; |                        |          |   |   | gene_id "XLOC_007392"; transcript_id "TCONS_00012622"; exon_number |
| chr10                                      | Cufflinks exon81565795 | 81565878 | . | - | .                                                                  |
| "4"; oId "CUFF.11764.3"; tss_id "TSS9379"; |                        |          |   |   | gene_id "XLOC_007392"; transcript_id "TCONS_00012622"; exon_number |
| chr10                                      | Cufflinks exon81568515 | 81568588 | . | - | .                                                                  |
| "5"; oId "CUFF.11764.3"; tss_id "TSS9379"; |                        |          |   |   | gene_id "XLOC_007392"; transcript_id "TCONS_00012622"; exon_number |
| chr10                                      | Cufflinks exon81574369 | 81574472 | . | - | .                                                                  |
| "6"; oId "CUFF.11764.3"; tss_id "TSS9379"; |                        |          |   |   | gene_id "XLOC_007392"; transcript_id "TCONS_00012622"; exon_number |
| chr10                                      | Cufflinks exon81585954 | 81586350 | . | - | .                                                                  |
| "7"; oId "CUFF.11764.3"; tss_id "TSS9379"; |                        |          |   |   | gene_id "XLOC_007392"; transcript_id "TCONS_00012622"; exon_number |
| chr10                                      | Cufflinks exon98352841 | 98355391 | . | - | .                                                                  |
| "1"; oId "CUFF.12366.2"; tss_id "TSS9555"; |                        |          |   |   | gene_id "XLOC_007528"; transcript_id "TCONS_00012850"; exon_number |
| chr10                                      | Cufflinks exon98362037 | 98362155 | . | - | .                                                                  |
| "2"; oId "CUFF.12366.2"; tss_id "TSS9555"; |                        |          |   |   | gene_id "XLOC_007528"; transcript_id "TCONS_00012850"; exon_number |
| chr10                                      | Cufflinks exon98363736 | 98363806 | . | - | .                                                                  |
| "3"; oId "CUFF.12366.2"; tss_id "TSS9555"; |                        |          |   |   | gene_id "XLOC_007528"; transcript_id "TCONS_00012850"; exon_number |
| chr10                                      | Cufflinks exon98369469 | 98369625 | . | - | .                                                                  |
| "4"; oId "CUFF.12366.2"; tss_id "TSS9555"; |                        |          |   |   | gene_id "XLOC_007528"; transcript_id "TCONS_00012850"; exon_number |
| chr10                                      | Cufflinks exon98370445 | 98370467 | . | - | .                                                                  |
| "5"; oId "CUFF.12366.2"; tss_id "TSS9555"; |                        |          |   |   | gene_id "XLOC_007528"; transcript_id "TCONS_00012850"; exon_number |
| chr10                                      | Cufflinks exon98981930 | 98985889 | . | - | .                                                                  |
| "1"; oId "CUFF.12385.1"; tss_id "TSS9568"; |                        |          |   |   | gene_id "XLOC_007535"; transcript_id "TCONS_00012864"; exon_number |

|       |                |           |           |   |   |   |                                                                                                                |
|-------|----------------|-----------|-----------|---|---|---|----------------------------------------------------------------------------------------------------------------|
| chr10 | Cufflinks exon | 98987510  | 98987613  | . | - | . | gene_id "XLOC_007535"; transcript_id "TCONS_00012864"; exon_number "2"; oId "CUFF.12385.1"; tss_id "TSS9568";  |
| chr10 | Cufflinks exon | 113909622 | 113913424 | . | - | . | gene_id "XLOC_007665"; transcript_id "TCONS_00013116"; exon_number "1"; oId "CUFF.12813.1"; tss_id "TSS9751";  |
| chr10 | Cufflinks exon | 113914387 | 113914447 | . | - | . | gene_id "XLOC_007665"; transcript_id "TCONS_00013116"; exon_number "2"; oId "CUFF.12813.1"; tss_id "TSS9751";  |
| chr10 | Cufflinks exon | 113915624 | 113915811 | . | - | . | gene_id "XLOC_007665"; transcript_id "TCONS_00013116"; exon_number "3"; oId "CUFF.12813.1"; tss_id "TSS9751";  |
| chr10 | Cufflinks exon | 113917007 | 113917147 | . | - | . | gene_id "XLOC_007665"; transcript_id "TCONS_00013116"; exon_number "4"; oId "CUFF.12813.1"; tss_id "TSS9751";  |
| chr10 | Cufflinks exon | 113918074 | 113918151 | . | - | . | gene_id "XLOC_007665"; transcript_id "TCONS_00013116"; exon_number "5"; oId "CUFF.12813.1"; tss_id "TSS9751";  |
| chr10 | Cufflinks exon | 113919669 | 113919811 | . | - | . | gene_id "XLOC_007665"; transcript_id "TCONS_00013116"; exon_number "6"; oId "CUFF.12813.1"; tss_id "TSS9751";  |
| chr10 | Cufflinks exon | 113920073 | 113920112 | . | - | . | gene_id "XLOC_007665"; transcript_id "TCONS_00013116"; exon_number "7"; oId "CUFF.12813.1"; tss_id "TSS9751";  |
| chr10 | Cufflinks exon | 117526099 | 117528201 | . | - | . | gene_id "XLOC_007686"; transcript_id "TCONS_00013160"; exon_number "1"; oId "CUFF.12917.1"; tss_id "TSS9783";  |
| chr10 | Cufflinks exon | 117535915 | 117536161 | . | - | . | gene_id "XLOC_007686"; transcript_id "TCONS_00013160"; exon_number "2"; oId "CUFF.12917.1"; tss_id "TSS9783";  |
| chr10 | Cufflinks exon | 117603987 | 117604046 | . | - | . | gene_id "XLOC_007686"; transcript_id "TCONS_00013160"; exon_number "3"; oId "CUFF.12917.1"; tss_id "TSS9783";  |
| chr10 | Cufflinks exon | 117625928 | 117626093 | . | - | . | gene_id "XLOC_007686"; transcript_id "TCONS_00013160"; exon_number "4"; oId "CUFF.12917.1"; tss_id "TSS9783";  |
| chr10 | Cufflinks exon | 117589236 | 117590572 | . | - | . | gene_id "XLOC_007686"; transcript_id "TCONS_00013162"; exon_number "1"; oId "CUFF.12917.2"; tss_id "TSS9783";  |
| chr10 | Cufflinks exon | 117603987 | 117604046 | . | - | . | gene_id "XLOC_007686"; transcript_id "TCONS_00013162"; exon_number "2"; oId "CUFF.12917.2"; tss_id "TSS9783";  |
| chr10 | Cufflinks exon | 117625928 | 117626093 | . | - | . | gene_id "XLOC_007686"; transcript_id "TCONS_00013162"; exon_number "3"; oId "CUFF.12917.2"; tss_id "TSS9783";  |
| chr10 | Cufflinks exon | 118231670 | 118232190 | . | - | . | gene_id "XLOC_007693"; transcript_id "TCONS_00013173"; exon_number "1"; oId "CUFF.12942.1"; tss_id "TSS9794";  |
| chr10 | Cufflinks exon | 118232357 | 118232591 | . | - | . | gene_id "XLOC_007693"; transcript_id "TCONS_00013173"; exon_number "2"; oId "CUFF.12942.1"; tss_id "TSS9794";  |
| chr10 | Cufflinks exon | 134744864 | 134745717 | . | - | . | gene_id "XLOC_007889"; transcript_id "TCONS_00013499"; exon_number "1"; oId "CUFF.13558.1"; tss_id "TSS10038"; |
| chr10 | Cufflinks exon | 134745776 | 134746126 | . | - | . | gene_id "XLOC_007889"; transcript_id "TCONS_00013499"; exon_number "2"; oId "CUFF.13558.1"; tss_id "TSS10038"; |
| chr11 | Cufflinks exon | 47102398  | 47102418  | . | + | . | gene_id "XLOC_008424"; transcript_id "TCONS_00014330"; exon_number "1"; oId "CUFF.15326.1"; tss_id "TSS10703"; |
| chr11 | Cufflinks exon | 47273022  | 47273855  | . | + | . | gene_id "XLOC_008424"; transcript_id "TCONS_00014330"; exon_number "2"; oId "CUFF.15326.1"; tss_id "TSS10703"; |
| chr11 | Cufflinks exon | 63858676  | 63858862  | . | + | . | gene_id "XLOC_008563"; transcript_id "TCONS_00014558"; exon_number                                             |

"1"; oId "CUFF.15884.2"; tss\_id "TSS10871";  
chr11 Cufflinks exon63859114 63859712 . + . gene\_id "XLOC\_008563"; transcript\_id "TCONS\_00014558"; exon\_number  
"2"; oId "CUFF.15884.2"; tss\_id "TSS10871";  
chr11 Cufflinks exon65006977 65007045 . + . gene\_id "XLOC\_008596"; transcript\_id "TCONS\_00014629"; exon\_number  
"1"; oId "CUFF.15986.8"; tss\_id "TSS10920";  
chr11 Cufflinks exon65009461 65010378 . + . gene\_id "XLOC\_008596"; transcript\_id "TCONS\_00014629"; exon\_number  
"2"; oId "CUFF.15986.8"; tss\_id "TSS10920";  
chr11 Cufflinks exon74705783 74705972 . + . gene\_id "XLOC\_008802"; transcript\_id "TCONS\_00014975"; exon\_number  
"1"; oId "CUFF.16691.1"; tss\_id "TSS11190";  
chr11 Cufflinks exon74707906 74707922 . + . gene\_id "XLOC\_008802"; transcript\_id "TCONS\_00014975"; exon\_number  
"2"; oId "CUFF.16691.1"; tss\_id "TSS11190";  
chr11 Cufflinks exon114128344 114128600 . + . gene\_id "XLOC\_009013"; transcript\_id "TCONS\_00015357"; exon\_number  
"1"; oId "CUFF.17551.1"; tss\_id "TSS11450";  
chr11 Cufflinks exon114133570 114133656 . + . gene\_id "XLOC\_009013"; transcript\_id "TCONS\_00015357"; exon\_number  
"2"; oId "CUFF.17551.1"; tss\_id "TSS11450";  
chr11 Cufflinks exon114136249 114136522 . + . gene\_id "XLOC\_009013"; transcript\_id "TCONS\_00015357"; exon\_number  
"3"; oId "CUFF.17551.1"; tss\_id "TSS11450";  
chr11 Cufflinks exon118963529 118963535 . + . gene\_id "XLOC\_009067"; transcript\_id "TCONS\_00015440"; exon\_number  
"1"; oId "CUFF.17757.2"; tss\_id "TSS11516";  
chr11 Cufflinks exon118963659 118963731 . + . gene\_id "XLOC\_009067"; transcript\_id "TCONS\_00015440"; exon\_number  
"2"; oId "CUFF.17757.2"; tss\_id "TSS11516";  
chr11 Cufflinks exon118963820 118964259 . + . gene\_id "XLOC\_009067"; transcript\_id "TCONS\_00015440"; exon\_number  
"3"; oId "CUFF.17757.2"; tss\_id "TSS11516";  
chr11 Cufflinks exon134247024 134247148 . + . gene\_id "XLOC\_009222"; transcript\_id "TCONS\_00015723"; exon\_number  
"1"; oId "CUFF.18217.2"; tss\_id "TSS11713";  
chr11 Cufflinks exon134251653 134252131 . + . gene\_id "XLOC\_009222"; transcript\_id "TCONS\_00015723"; exon\_number  
"2"; oId "CUFF.18217.2"; tss\_id "TSS11713";  
chr11 Cufflinks exon134248551 134249431 . + . gene\_id "XLOC\_009222"; transcript\_id "TCONS\_00015724"; exon\_number  
"1"; oId "CUFF.18217.3"; tss\_id "TSS11714";  
chr11 Cufflinks exon134251653 134252131 . + . gene\_id "XLOC\_009222"; transcript\_id "TCONS\_00015724"; exon\_number  
"2"; oId "CUFF.18217.3"; tss\_id "TSS11714";  
chr11 Cufflinks exon283705 283782 . - . gene\_id "XLOC\_009266"; transcript\_id "TCONS\_00015783"; exon\_number "1"; oId  
"CUFF.13686.1"; tss\_id "TSS11768";  
chr11 Cufflinks exon283953 284202 . - . gene\_id "XLOC\_009266"; transcript\_id "TCONS\_00015783"; exon\_number "2"; oId  
"CUFF.13686.1"; tss\_id "TSS11768";  
chr11 Cufflinks exon3023299 3023404 . - . gene\_id "XLOC\_009347"; transcript\_id "TCONS\_00015909"; exon\_number "1"; oId  
"CUFF.13937.1"; tss\_id "TSS11864";  
chr11 Cufflinks exon3023504 3023767 . - . gene\_id "XLOC\_009347"; transcript\_id "TCONS\_00015909"; exon\_number "2"; oId  
"CUFF.13937.1"; tss\_id "TSS11864";  
chr11 Cufflinks exon3167224 3167362 . - . gene\_id "XLOC\_009353"; transcript\_id "TCONS\_00015917"; exon\_number "1"; oId  
"CUFF.13946.1"; tss\_id "TSS11870";  
chr11 Cufflinks exon3185170 3185546 . - . gene\_id "XLOC\_009353"; transcript\_id "TCONS\_00015917"; exon\_number "2"; oId  
"CUFF.13946.1"; tss\_id "TSS11870";



|       |                        |          |   |   |   |                                                                                                                |
|-------|------------------------|----------|---|---|---|----------------------------------------------------------------------------------------------------------------|
| chr11 | Cufflinks exon7458868  | 7462950  | . | - | . | gene_id "XLOC_009441"; transcript_id "TCONS_00016060"; exon_number "1"; oId "CUFF.14201.2"; tss_id "TSS11976"; |
| chr11 | Cufflinks exon7471604  | 7471673  | . | - | . | gene_id "XLOC_009441"; transcript_id "TCONS_00016060"; exon_number "2"; oId "CUFF.14201.2"; tss_id "TSS11976"; |
| chr11 | Cufflinks exon7479027  | 7479190  | . | - | . | gene_id "XLOC_009441"; transcript_id "TCONS_00016060"; exon_number "3"; oId "CUFF.14201.2"; tss_id "TSS11976"; |
| chr11 | Cufflinks exon7482470  | 7482567  | . | - | . | gene_id "XLOC_009441"; transcript_id "TCONS_00016060"; exon_number "4"; oId "CUFF.14201.2"; tss_id "TSS11976"; |
| chr11 | Cufflinks exon7486984  | 7487066  | . | - | . | gene_id "XLOC_009441"; transcript_id "TCONS_00016060"; exon_number "5"; oId "CUFF.14201.2"; tss_id "TSS11976"; |
| chr11 | Cufflinks exon10358695 | 10358705 | . | - | . | gene_id "XLOC_009497"; transcript_id "TCONS_00016153"; exon_number "1"; oId "CUFF.14326.1"; tss_id "TSS12050"; |
| chr11 | Cufflinks exon10530647 | 10531862 | . | - | . | gene_id "XLOC_009497"; transcript_id "TCONS_00016153"; exon_number "2"; oId "CUFF.14326.1"; tss_id "TSS12050"; |
| chr11 | Cufflinks exon10516981 | 10516998 | . | - | . | gene_id "XLOC_009497"; transcript_id "TCONS_00016155"; exon_number "1"; oId "CUFF.14326.3"; tss_id "TSS12051"; |
| chr11 | Cufflinks exon10530237 | 10532386 | . | - | . | gene_id "XLOC_009497"; transcript_id "TCONS_00016155"; exon_number "2"; oId "CUFF.14326.3"; tss_id "TSS12051"; |
| chr11 | Cufflinks exon18627948 | 18631501 | . | - | . | gene_id "XLOC_009584"; transcript_id "TCONS_00016300"; exon_number "1"; oId "CUFF.14638.1"; tss_id "TSS12163"; |
| chr11 | Cufflinks exon18632087 | 18632144 | . | - | . | gene_id "XLOC_009584"; transcript_id "TCONS_00016300"; exon_number "2"; oId "CUFF.14638.1"; tss_id "TSS12163"; |
| chr11 | Cufflinks exon31452152 | 31452680 | . | - | . | gene_id "XLOC_009637"; transcript_id "TCONS_00016380"; exon_number "1"; oId "CUFF.14985.1"; tss_id "TSS12232"; |
| chr11 | Cufflinks exon31452946 | 31454115 | . | - | . | gene_id "XLOC_009637"; transcript_id "TCONS_00016380"; exon_number "2"; oId "CUFF.14985.1"; tss_id "TSS12232"; |
| chr11 | Cufflinks exon31455007 | 31455117 | . | - | . | gene_id "XLOC_009637"; transcript_id "TCONS_00016380"; exon_number "3"; oId "CUFF.14985.1"; tss_id "TSS12232"; |
| chr11 | Cufflinks exon31531066 | 31531175 | . | - | . | gene_id "XLOC_009637"; transcript_id "TCONS_00016380"; exon_number "4"; oId "CUFF.14985.1"; tss_id "TSS12232"; |
| chr11 | Cufflinks exon57157432 | 57158451 | . | - | . | gene_id "XLOC_009784"; transcript_id "TCONS_00016654"; exon_number "1"; oId "CUFF.15459.8"; tss_id "TSS12433"; |
| chr11 | Cufflinks exon57159964 | 57161804 | . | - | . | gene_id "XLOC_009784"; transcript_id "TCONS_00016654"; exon_number "2"; oId "CUFF.15459.8"; tss_id "TSS12433"; |
| chr11 | Cufflinks exon57165578 | 57166454 | . | - | . | gene_id "XLOC_009784"; transcript_id "TCONS_00016654"; exon_number "3"; oId "CUFF.15459.8"; tss_id "TSS12433"; |
| chr11 | Cufflinks exon64832735 | 64833945 | . | - | . | gene_id "XLOC_009930"; transcript_id "TCONS_00016934"; exon_number "1"; oId "CUFF.15967.1"; tss_id "TSS12635"; |
| chr11 | Cufflinks exon64834024 | 64834151 | . | - | . | gene_id "XLOC_009930"; transcript_id "TCONS_00016934"; exon_number "2"; oId "CUFF.15967.1"; tss_id "TSS12635"; |
| chr11 | Cufflinks exon64834285 | 64834362 | . | - | . | gene_id "XLOC_009930"; transcript_id "TCONS_00016934"; exon_number "3"; oId "CUFF.15967.1"; tss_id "TSS12635"; |
| chr11 | Cufflinks exon64835510 | 64835531 | . | - | . | gene_id "XLOC_009930"; transcript_id "TCONS_00016934"; exon_number "4"; oId "CUFF.15967.1"; tss_id "TSS12635"; |

|                                             |   |   |   |                                                                    |  |
|---------------------------------------------|---|---|---|--------------------------------------------------------------------|--|
| "4"; oId "CUFF.15967.1"; tss_id "TSS12635"; |   |   |   |                                                                    |  |
| chr11 Cufflinks exon64832735 64834151       | . | - | . | gene_id "XLOC_009930"; transcript_id "TCONS_00016935"; exon_number |  |
| "1"; oId "CUFF.15967.2"; tss_id "TSS12636"; |   |   |   |                                                                    |  |
| chr11 Cufflinks exon64834285 64834355       | . | - | . | gene_id "XLOC_009930"; transcript_id "TCONS_00016935"; exon_number |  |
| "2"; oId "CUFF.15967.2"; tss_id "TSS12636"; |   |   |   |                                                                    |  |
| chr11 Cufflinks exon64835964 64836058       | . | - | . | gene_id "XLOC_009930"; transcript_id "TCONS_00016935"; exon_number |  |
| "3"; oId "CUFF.15967.2"; tss_id "TSS12636"; |   |   |   |                                                                    |  |
| chr11 Cufflinks exon65783804 65784387       | . | - | . | gene_id "XLOC_009968"; transcript_id "TCONS_00016998"; exon_number |  |
| "1"; oId "CUFF.16121.1"; tss_id "TSS12680"; |   |   |   |                                                                    |  |
| chr11 Cufflinks exon65784531 65784645       | . | - | . | gene_id "XLOC_009968"; transcript_id "TCONS_00016998"; exon_number |  |
| "2"; oId "CUFF.16121.1"; tss_id "TSS12680"; |   |   |   |                                                                    |  |
| chr11 Cufflinks exon65786259 65786373       | . | - | . | gene_id "XLOC_009968"; transcript_id "TCONS_00016998"; exon_number |  |
| "3"; oId "CUFF.16121.1"; tss_id "TSS12680"; |   |   |   |                                                                    |  |
| chr11 Cufflinks exon65787611 65787686       | . | - | . | gene_id "XLOC_009968"; transcript_id "TCONS_00016998"; exon_number |  |
| "4"; oId "CUFF.16121.1"; tss_id "TSS12680"; |   |   |   |                                                                    |  |
| chr11 Cufflinks exon73386683 73389007       | . | - | . | gene_id "XLOC_010100"; transcript_id "TCONS_00017243"; exon_number |  |
| "1"; oId "CUFF.16589.4"; tss_id "TSS12869"; |   |   |   |                                                                    |  |
| chr11 Cufflinks exon73390699 73390765       | . | - | . | gene_id "XLOC_010100"; transcript_id "TCONS_00017243"; exon_number |  |
| "2"; oId "CUFF.16589.4"; tss_id "TSS12869"; |   |   |   |                                                                    |  |
| chr11 Cufflinks exon73390877 73390923       | . | - | . | gene_id "XLOC_010100"; transcript_id "TCONS_00017243"; exon_number |  |
| "3"; oId "CUFF.16589.4"; tss_id "TSS12869"; |   |   |   |                                                                    |  |
| chr11 Cufflinks exon76493625 76493900       | . | - | . | gene_id "XLOC_010137"; transcript_id "TCONS_00017309"; exon_number |  |
| "1"; oId "CUFF.16755.2"; tss_id "TSS12923"; |   |   |   |                                                                    |  |
| chr11 Cufflinks exon76494047 76494106       | . | - | . | gene_id "XLOC_010137"; transcript_id "TCONS_00017309"; exon_number |  |
| "2"; oId "CUFF.16755.2"; tss_id "TSS12923"; |   |   |   |                                                                    |  |
| chr11 Cufflinks exon76493625 76493900       | . | - | . | gene_id "XLOC_010137"; transcript_id "TCONS_00017308"; exon_number |  |
| "1"; oId "CUFF.16755.1"; tss_id "TSS12923"; |   |   |   |                                                                    |  |
| chr11 Cufflinks exon76494035 76494106       | . | - | . | gene_id "XLOC_010137"; transcript_id "TCONS_00017308"; exon_number |  |
| "2"; oId "CUFF.16755.1"; tss_id "TSS12923"; |   |   |   |                                                                    |  |
| chr11 Cufflinks exon93097960 93098132       | . | - | . | gene_id "XLOC_010216"; transcript_id "TCONS_00017462"; exon_number |  |
| "1"; oId "CUFF.17108.2"; tss_id "TSS13029"; |   |   |   |                                                                    |  |
| chr11 Cufflinks exon93098513 93098632       | . | - | . | gene_id "XLOC_010216"; transcript_id "TCONS_00017462"; exon_number |  |
| "2"; oId "CUFF.17108.2"; tss_id "TSS13029"; |   |   |   |                                                                    |  |
| chr11 Cufflinks exon114024123 114024273     | . | - | . | gene_id "XLOC_010339"; transcript_id "TCONS_00017686"; exon_number |  |
| "1"; oId "CUFF.17546.1"; tss_id "TSS13177"; |   |   |   |                                                                    |  |
| chr11 Cufflinks exon114038966 114039143     | . | - | . | gene_id "XLOC_010339"; transcript_id "TCONS_00017686"; exon_number |  |
| "2"; oId "CUFF.17546.1"; tss_id "TSS13177"; |   |   |   |                                                                    |  |
| chr11 Cufflinks exon114040605 114040777     | . | - | . | gene_id "XLOC_010339"; transcript_id "TCONS_00017686"; exon_number |  |
| "3"; oId "CUFF.17546.1"; tss_id "TSS13177"; |   |   |   |                                                                    |  |
| chr11 Cufflinks exon114043384 114043477     | . | - | . | gene_id "XLOC_010339"; transcript_id "TCONS_00017686"; exon_number |  |
| "4"; oId "CUFF.17546.1"; tss_id "TSS13177"; |   |   |   |                                                                    |  |
| chr11 Cufflinks exon114038218 114039143     | . | - | . | gene_id "XLOC_010339"; transcript_id "TCONS_00017691"; exon_number |  |
| "1"; oId "CUFF.17546.2"; tss_id "TSS13177"; |   |   |   |                                                                    |  |

|       |                                                          |           |           |   |   |   |                                                                    |
|-------|----------------------------------------------------------|-----------|-----------|---|---|---|--------------------------------------------------------------------|
| chr11 | Cufflinks exon                                           | 114040605 | 114040772 | . | - | . | gene_id "XLOC_010339"; transcript_id "TCONS_00017691"; exon_number |
|       |                                                          |           |           |   |   |   | "2"; oId "CUFF.17546.2"; tss_id "TSS13177";                        |
| chr11 | Cufflinks exon                                           | 114043379 | 114043477 | . | - | . | gene_id "XLOC_010339"; transcript_id "TCONS_00017691"; exon_number |
|       |                                                          |           |           |   |   |   | "3"; oId "CUFF.17546.2"; tss_id "TSS13177";                        |
| chr11 | Cufflinks exon                                           | 124960809 | 124967636 | . | - | . | gene_id "XLOC_010468"; transcript_id "TCONS_00017920"; exon_number |
|       |                                                          |           |           |   |   |   | "1"; oId "CUFF.17950.9"; tss_id "TSS13349";                        |
| chr11 | Cufflinks exon                                           | 124971097 | 124972213 | . | - | . | gene_id "XLOC_010468"; transcript_id "TCONS_00017920"; exon_number |
|       |                                                          |           |           |   |   |   | "2"; oId "CUFF.17950.9"; tss_id "TSS13349";                        |
| chr11 | Cufflinks exon                                           | 124972630 | 124972705 | . | - | . | gene_id "XLOC_010468"; transcript_id "TCONS_00017920"; exon_number |
|       |                                                          |           |           |   |   |   | "3"; oId "CUFF.17950.9"; tss_id "TSS13349";                        |
| chr11 | Cufflinks exon                                           | 124981481 | 124981659 | . | - | . | gene_id "XLOC_010468"; transcript_id "TCONS_00017920"; exon_number |
|       |                                                          |           |           |   |   |   | "4"; oId "CUFF.17950.9"; tss_id "TSS13349";                        |
| chr11 | Cufflinks exon                                           | 124960809 | 124967636 | . | - | . | gene_id "XLOC_010468"; transcript_id "TCONS_00017917"; exon_number |
|       |                                                          |           |           |   |   |   | "1"; oId "CUFF.17950.1"; tss_id "TSS13349";                        |
| chr11 | Cufflinks exon                                           | 124971097 | 124972225 | . | - | . | gene_id "XLOC_010468"; transcript_id "TCONS_00017917"; exon_number |
|       |                                                          |           |           |   |   |   | "2"; oId "CUFF.17950.1"; tss_id "TSS13349";                        |
| chr11 | Cufflinks exon                                           | 124972629 | 124972705 | . | - | . | gene_id "XLOC_010468"; transcript_id "TCONS_00017917"; exon_number |
|       |                                                          |           |           |   |   |   | "3"; oId "CUFF.17950.1"; tss_id "TSS13349";                        |
| chr11 | Cufflinks exon                                           | 124980387 | 124980445 | . | - | . | gene_id "XLOC_010468"; transcript_id "TCONS_00017917"; exon_number |
|       |                                                          |           |           |   |   |   | "4"; oId "CUFF.17950.1"; tss_id "TSS13349";                        |
| chr11 | Cufflinks exon                                           | 124980540 | 124980642 | . | - | . | gene_id "XLOC_010468"; transcript_id "TCONS_00017917"; exon_number |
|       |                                                          |           |           |   |   |   | "5"; oId "CUFF.17950.1"; tss_id "TSS13349";                        |
| chr11 | Cufflinks exon                                           | 124981435 | 124981659 | . | - | . | gene_id "XLOC_010468"; transcript_id "TCONS_00017917"; exon_number |
|       |                                                          |           |           |   |   |   | "6"; oId "CUFF.17950.1"; tss_id "TSS13349";                        |
| chr11 | Cufflinks exon                                           | 124960809 | 124967636 | . | - | . | gene_id "XLOC_010468"; transcript_id "TCONS_00017922"; exon_number |
|       |                                                          |           |           |   |   |   | "1"; oId "CUFF.17950.7"; tss_id "TSS13349";                        |
| chr11 | Cufflinks exon                                           | 124971097 | 124972705 | . | - | . | gene_id "XLOC_010468"; transcript_id "TCONS_00017922"; exon_number |
|       |                                                          |           |           |   |   |   | "2"; oId "CUFF.17950.7"; tss_id "TSS13349";                        |
| chr11 | Cufflinks exon                                           | 124981481 | 124981734 | . | - | . | gene_id "XLOC_010468"; transcript_id "TCONS_00017922"; exon_number |
|       |                                                          |           |           |   |   |   | "3"; oId "CUFF.17950.7"; tss_id "TSS13349";                        |
| chr11 | Cufflinks exon                                           | 124960809 | 124967636 | . | - | . | gene_id "XLOC_010468"; transcript_id "TCONS_00017925";             |
|       | exon_number "1"; oId "CUFF.17950.8"; tss_id "TSS13349";  |           |           |   |   |   |                                                                    |
| chr11 | Cufflinks exon                                           | 124971097 | 124972213 | . | - | . | gene_id "XLOC_010468"; transcript_id "TCONS_00017925";             |
|       | exon_number "2"; oId "CUFF.17950.8"; tss_id "TSS13349";  |           |           |   |   |   |                                                                    |
| chr11 | Cufflinks exon                                           | 124972630 | 124972705 | . | - | . | gene_id "XLOC_010468"; transcript_id "TCONS_00017925";             |
|       | exon_number "3"; oId "CUFF.17950.8"; tss_id "TSS13349";  |           |           |   |   |   |                                                                    |
| chr11 | Cufflinks exon                                           | 124981483 | 124981768 | . | - | . | gene_id "XLOC_010468"; transcript_id "TCONS_00017925";             |
|       | exon_number "4"; oId "CUFF.17950.8"; tss_id "TSS13349";  |           |           |   |   |   |                                                                    |
| chr11 | Cufflinks exon                                           | 124960809 | 124967636 | . | - | . | gene_id "XLOC_010468"; transcript_id "TCONS_00017923";             |
|       | exon_number "1"; oId "CUFF.17950.12"; tss_id "TSS13349"; |           |           |   |   |   |                                                                    |
| chr11 | Cufflinks exon                                           | 124971097 | 124972213 | . | - | . | gene_id "XLOC_010468"; transcript_id "TCONS_00017923";             |
|       | exon_number "2"; oId "CUFF.17950.12"; tss_id "TSS13349"; |           |           |   |   |   |                                                                    |
| chr11 | Cufflinks exon                                           | 124972630 | 124972705 | . | - | . | gene_id "XLOC_010468"; transcript_id "TCONS_00017923";             |

exon\_number "3"; oId "CUFF.17950.12"; tss\_id "TSS13349";  
 chr11 Cufflinks exon 124980540 124980642 . - . gene\_id "XLOC\_010468"; transcript\_id "TCONS\_00017923";  
 exon\_number "4"; oId "CUFF.17950.12"; tss\_id "TSS13349";  
 chr11 Cufflinks exon 124981483 124981768 . - . gene\_id "XLOC\_010468"; transcript\_id "TCONS\_00017923";  
 exon\_number "5"; oId "CUFF.17950.12"; tss\_id "TSS13349";  
 chr11 Cufflinks exon 128561518 128562016 . - . gene\_id "XLOC\_010495"; transcript\_id "TCONS\_00017974";  
 exon\_number "1"; oId "CUFF.18056.5"; tss\_id "TSS13384";  
 chr11 Cufflinks exon 128562550 128563286 . - . gene\_id "XLOC\_010495"; transcript\_id "TCONS\_00017974";  
 exon\_number "2"; oId "CUFF.18056.5"; tss\_id "TSS13384";  
 chr11 Cufflinks exon 128565808 128565918 . - . gene\_id "XLOC\_010495"; transcript\_id "TCONS\_00017974";  
 exon\_number "3"; oId "CUFF.18056.5"; tss\_id "TSS13384";  
 chr11 Cufflinks exon 128561518 128562016 . - . gene\_id "XLOC\_010495"; transcript\_id "TCONS\_00017975";  
 exon\_number "1"; oId "CUFF.18056.4"; tss\_id "TSS13384";  
 chr11 Cufflinks exon 128562550 128563286 . - . gene\_id "XLOC\_010495"; transcript\_id "TCONS\_00017975";  
 exon\_number "2"; oId "CUFF.18056.4"; tss\_id "TSS13384";  
 chr11 Cufflinks exon 128565134 128565229 . - . gene\_id "XLOC\_010495"; transcript\_id "TCONS\_00017975";  
 exon\_number "3"; oId "CUFF.18056.4"; tss\_id "TSS13384";  
 chr11 Cufflinks exon 128565808 128565919 . - . gene\_id "XLOC\_010495"; transcript\_id "TCONS\_00017975";  
 exon\_number "4"; oId "CUFF.18056.4"; tss\_id "TSS13384";  
 chr11 Cufflinks exon 128561518 128562016 . - . gene\_id "XLOC\_010495"; transcript\_id "TCONS\_00017976";  
 exon\_number "1"; oId "CUFF.18056.6"; tss\_id "TSS13384";  
 chr11 Cufflinks exon 128565808 128565944 . - . gene\_id "XLOC\_010495"; transcript\_id "TCONS\_00017976";  
 exon\_number "2"; oId "CUFF.18056.6"; tss\_id "TSS13384";  
 chr11 Cufflinks exon 134024416 134024462 . - . gene\_id "XLOC\_010561"; transcript\_id "TCONS\_00018078";  
 exon\_number "1"; oId "CUFF.18190.1"; tss\_id "TSS13464";  
 chr11 Cufflinks exon 134024487 134025895 . - . gene\_id "XLOC\_010561"; transcript\_id "TCONS\_00018078";  
 exon\_number "2"; oId "CUFF.18190.1"; tss\_id "TSS13464";  
 chr12 Cufflinks exon 2994933 2995063 . + . gene\_id "XLOC\_010641"; transcript\_id "TCONS\_00018209"; exon\_number "1"; oId  
 "CUFF.18458.1"; tss\_id "TSS13565";  
 chr12 Cufflinks exon 2995119 2995336 . + . gene\_id "XLOC\_010641"; transcript\_id "TCONS\_00018209"; exon\_number "2"; oId  
 "CUFF.18458.1"; tss\_id "TSS13565";  
 chr12 Cufflinks exon 4551078 4551233 . + . gene\_id "XLOC\_010653"; transcript\_id "TCONS\_00018229"; exon\_number "1"; oId  
 "CUFF.18492.1"; tss\_id "TSS13582";  
 chr12 Cufflinks exon 4552783 4554266 . + . gene\_id "XLOC\_010653"; transcript\_id "TCONS\_00018229"; exon\_number "2"; oId  
 "CUFF.18492.1"; tss\_id "TSS13582";  
 chr12 Cufflinks exon 48240051 48240254 . + . gene\_id "XLOC\_011089"; transcript\_id "TCONS\_00018889";  
 exon\_number "1"; oId "CUFF.20217.1"; tss\_id "TSS14100";  
 chr12 Cufflinks exon 48240472 48240582 . + . gene\_id "XLOC\_011089"; transcript\_id "TCONS\_00018889";  
 exon\_number "2"; oId "CUFF.20217.1"; tss\_id "TSS14100";  
 chr12 Cufflinks exon 48240655 48240690 . + . gene\_id "XLOC\_011089"; transcript\_id "TCONS\_00018889";  
 exon\_number "3"; oId "CUFF.20217.1"; tss\_id "TSS14100";  
 chr12 Cufflinks exon 70914036 70914047 . + . gene\_id "XLOC\_011434"; transcript\_id "TCONS\_00019470";  
 exon\_number "1"; oId "CUFF.21404.1"; tss\_id "TSS14530";

|                  |      |                  |          |             |   |   |                                                        |
|------------------|------|------------------|----------|-------------|---|---|--------------------------------------------------------|
| chr12 Cufflinks  | exon | 70916304         | 70916410 | .           | + | . | gene_id "XLOC_011434"; transcript_id "TCONS_00019470"; |
| exon_number "2"; | oId  | "CUFF.21404.1";  | tss_id   | "TSS14530"; |   |   |                                                        |
| chr12 Cufflinks  | exon | 70931830         | 70931961 | .           | + | . | gene_id "XLOC_011434"; transcript_id "TCONS_00019470"; |
| exon_number "3"; | oId  | "CUFF.21404.1";  | tss_id   | "TSS14530"; |   |   |                                                        |
| chr12 Cufflinks  | exon | 95945353         | 95945576 | .           | + | . | gene_id "XLOC_011551"; transcript_id "TCONS_00019665"; |
| exon_number "1"; | oId  | "CUFF.21936.4";  | tss_id   | "TSS14664"; |   |   |                                                        |
| chr12 Cufflinks  | exon | 96028300         | 96028517 | .           | + | . | gene_id "XLOC_011551"; transcript_id "TCONS_00019665"; |
| exon_number "2"; | oId  | "CUFF.21936.4";  | tss_id   | "TSS14664"; |   |   |                                                        |
| chr12 Cufflinks  | exon | 96043104         | 96043182 | .           | + | . | gene_id "XLOC_011551"; transcript_id "TCONS_00019665"; |
| exon_number "3"; | oId  | "CUFF.21936.4";  | tss_id   | "TSS14664"; |   |   |                                                        |
| chr12 Cufflinks  | exon | 96059459         | 96059552 | .           | + | . | gene_id "XLOC_011551"; transcript_id "TCONS_00019665"; |
| exon_number "4"; | oId  | "CUFF.21936.4";  | tss_id   | "TSS14664"; |   |   |                                                        |
| chr12 Cufflinks  | exon | 96131623         | 96131690 | .           | + | . | gene_id "XLOC_011551"; transcript_id "TCONS_00019665"; |
| exon_number "5"; | oId  | "CUFF.21936.4";  | tss_id   | "TSS14664"; |   |   |                                                        |
| chr12 Cufflinks  | exon | 96133938         | 96135118 | .           | + | . | gene_id "XLOC_011551"; transcript_id "TCONS_00019665"; |
| exon_number "6"; | oId  | "CUFF.21936.4";  | tss_id   | "TSS14664"; |   |   |                                                        |
| chr12 Cufflinks  | exon | 96133343         | 96134106 | .           | + | . | gene_id "XLOC_011551"; transcript_id "TCONS_00019675"; |
| exon_number "1"; | oId  | "CUFF.21936.13"; | tss_id   | "TSS14668"; |   |   |                                                        |
| chr12 Cufflinks  | exon | 96137277         | 96137299 | .           | + | . | gene_id "XLOC_011551"; transcript_id "TCONS_00019675"; |
| exon_number "2"; | oId  | "CUFF.21936.13"; | tss_id   | "TSS14668"; |   |   |                                                        |
| chr12 Cufflinks  | exon | 10089077         | 10091769 | .           | - | . | gene_id "XLOC_012088"; transcript_id "TCONS_00020633"; |
| exon_number "1"; | oId  | "CUFF.18938.1";  | tss_id   | "TSS15357"; |   |   |                                                        |
| chr12 Cufflinks  | exon | 10092508         | 10092712 | .           | - | . | gene_id "XLOC_012088"; transcript_id "TCONS_00020633"; |
| exon_number "2"; | oId  | "CUFF.18938.1";  | tss_id   | "TSS15357"; |   |   |                                                        |
| chr12 Cufflinks  | exon | 10089077         | 10089413 | .           | - | . | gene_id "XLOC_012088"; transcript_id "TCONS_00020634"; |
| exon_number "1"; | oId  | "CUFF.18938.2";  | tss_id   | "TSS15358"; |   |   |                                                        |
| chr12 Cufflinks  | exon | 10091662         | 10091769 | .           | - | . | gene_id "XLOC_012088"; transcript_id "TCONS_00020634"; |
| exon_number "2"; | oId  | "CUFF.18938.2";  | tss_id   | "TSS15358"; |   |   |                                                        |
| chr12 Cufflinks  | exon | 10092508         | 10092692 | .           | - | . | gene_id "XLOC_012088"; transcript_id "TCONS_00020634"; |
| exon_number "3"; | oId  | "CUFF.18938.2";  | tss_id   | "TSS15358"; |   |   |                                                        |
| chr12 Cufflinks  | exon | 10095088         | 10095171 | .           | - | . | gene_id "XLOC_012088"; transcript_id "TCONS_00020634"; |
| exon_number "4"; | oId  | "CUFF.18938.2";  | tss_id   | "TSS15358"; |   |   |                                                        |
| chr12 Cufflinks  | exon | 10095729         | 10096094 | .           | - | . | gene_id "XLOC_012088"; transcript_id "TCONS_00020634"; |
| exon_number "5"; | oId  | "CUFF.18938.2";  | tss_id   | "TSS15358"; |   |   |                                                        |
| chr12 Cufflinks  | exon | 12835856         | 12836929 | .           | - | . | gene_id "XLOC_012195"; transcript_id "TCONS_00020777"; |
| exon_number "1"; | oId  | "CUFF.19310.3";  | tss_id   | "TSS15479"; |   |   |                                                        |
| chr12 Cufflinks  | exon | 12837285         | 12837441 | .           | - | . | gene_id "XLOC_012195"; transcript_id "TCONS_00020777"; |
| exon_number "2"; | oId  | "CUFF.19310.3";  | tss_id   | "TSS15479"; |   |   |                                                        |
| chr12 Cufflinks  | exon | 12841434         | 12841866 | .           | - | . | gene_id "XLOC_012195"; transcript_id "TCONS_00020777"; |
| exon_number "3"; | oId  | "CUFF.19310.3";  | tss_id   | "TSS15479"; |   |   |                                                        |
| chr12 Cufflinks  | exon | 12848393         | 12848445 | .           | - | . | gene_id "XLOC_012195"; transcript_id "TCONS_00020777"; |
| exon_number "4"; | oId  | "CUFF.19310.3";  | tss_id   | "TSS15479"; |   |   |                                                        |
| chr12 Cufflinks  | exon | 12848999         | 12849130 | .           | - | . | gene_id "XLOC_012195"; transcript_id "TCONS_00020777"; |

exon\_number "5"; oId "CUFF.19310.3"; tss\_id "TSS15479";  
 chr12 Cufflinks exon 15674520 15675016 . - . gene\_id "XLOC\_012223"; transcript\_id "TCONS\_00020814";  
 exon\_number "1"; oId "CUFF.19415.1"; tss\_id "TSS15511";  
 chr12 Cufflinks exon 15678372 15678522 . - . gene\_id "XLOC\_012223"; transcript\_id "TCONS\_00020814";  
 exon\_number "2"; oId "CUFF.19415.1"; tss\_id "TSS15511";  
 chr12 Cufflinks exon 15708599 15708732 . - . gene\_id "XLOC\_012223"; transcript\_id "TCONS\_00020814";  
 exon\_number "3"; oId "CUFF.19415.1"; tss\_id "TSS15511";  
 chr12 Cufflinks exon 15714980 15715257 . - . gene\_id "XLOC\_012223"; transcript\_id "TCONS\_00020814";  
 exon\_number "4"; oId "CUFF.19415.1"; tss\_id "TSS15511";  
 chr12 Cufflinks exon 15694156 15694580 . - . gene\_id "XLOC\_012223"; transcript\_id "TCONS\_00020816";  
 exon\_number "1"; oId "CUFF.19415.2"; tss\_id "TSS15511";  
 chr12 Cufflinks exon 15696242 15696406 . - . gene\_id "XLOC\_012223"; transcript\_id "TCONS\_00020816";  
 exon\_number "2"; oId "CUFF.19415.2"; tss\_id "TSS15511";  
 chr12 Cufflinks exon 15708598 15708732 . - . gene\_id "XLOC\_012223"; transcript\_id "TCONS\_00020816";  
 exon\_number "3"; oId "CUFF.19415.2"; tss\_id "TSS15511";  
 chr12 Cufflinks exon 15714980 15715257 . - . gene\_id "XLOC\_012223"; transcript\_id "TCONS\_00020816";  
 exon\_number "4"; oId "CUFF.19415.2"; tss\_id "TSS15511";  
 chr12 Cufflinks exon 33523923 33524601 . - . gene\_id "XLOC\_012409"; transcript\_id "TCONS\_00021074";  
 exon\_number "1"; oId "CUFF.19956.1"; tss\_id "TSS15734";  
 chr12 Cufflinks exon 33529693 33529836 . - . gene\_id "XLOC\_012409"; transcript\_id "TCONS\_00021074";  
 exon\_number "2"; oId "CUFF.19956.1"; tss\_id "TSS15734";  
 chr12 Cufflinks exon 33532767 33532900 . - . gene\_id "XLOC\_012409"; transcript\_id "TCONS\_00021074";  
 exon\_number "3"; oId "CUFF.19956.1"; tss\_id "TSS15734";  
 chr12 Cufflinks exon 33533194 33533265 . - . gene\_id "XLOC\_012409"; transcript\_id "TCONS\_00021074";  
 exon\_number "4"; oId "CUFF.19956.1"; tss\_id "TSS15734";  
 chr12 Cufflinks exon 33528301 33529836 . - . gene\_id "XLOC\_012409"; transcript\_id "TCONS\_00021077";  
 exon\_number "1"; oId "CUFF.19956.2"; tss\_id "TSS15734";  
 chr12 Cufflinks exon 33532767 33532896 . - . gene\_id "XLOC\_012409"; transcript\_id "TCONS\_00021077";  
 exon\_number "2"; oId "CUFF.19956.2"; tss\_id "TSS15734";  
 chr12 Cufflinks exon33533194 33533273 . - . gene\_id "XLOC\_012409"; transcript\_id "TCONS\_00021077"; exon\_number  
 "3"; oId "CUFF.19956.2"; tss\_id "TSS15734";  
 chr12 Cufflinks exon54667777 54668093 . - . gene\_id "XLOC\_012645"; transcript\_id "TCONS\_00021502"; exon\_number  
 "1"; oId "CUFF.20720.1"; tss\_id "TSS16062";  
 chr12 Cufflinks exon54673459 54673622 . - . gene\_id "XLOC\_012645"; transcript\_id "TCONS\_00021502"; exon\_number  
 "2"; oId "CUFF.20720.1"; tss\_id "TSS16062";  
 chr12 Cufflinks exon62582984 62585487 . - . gene\_id "XLOC\_012800"; transcript\_id "TCONS\_00021766"; exon\_number  
 "1"; oId "CUFF.21144.2"; tss\_id "TSS16263";  
 chr12 Cufflinks exon62585693 62586709 . - . gene\_id "XLOC\_012800"; transcript\_id "TCONS\_00021766"; exon\_number  
 "2"; oId "CUFF.21144.2"; tss\_id "TSS16263";  
 chr12 Cufflinks exon70080652 70081239 . - . gene\_id "XLOC\_012865"; transcript\_id "TCONS\_00021865"; exon\_number  
 "1"; oId "CUFF.21364.4"; tss\_id "TSS16342";  
 chr12 Cufflinks exon70082850 70083201 . - . gene\_id "XLOC\_012865"; transcript\_id "TCONS\_00021865"; exon\_number  
 "2"; oId "CUFF.21364.4"; tss\_id "TSS16342";

|       |                |           |           |   |   |   |                                                                                                                |
|-------|----------------|-----------|-----------|---|---|---|----------------------------------------------------------------------------------------------------------------|
| chr12 | Cufflinks exon | 93177794  | 93178800  | . | - | . | gene_id "XLOC_013015"; transcript_id "TCONS_00022083"; exon_number "1"; oId "CUFF.21803.1"; tss_id "TSS16519"; |
| chr12 | Cufflinks exon | 93179925  | 93180908  | . | - | . | gene_id "XLOC_013015"; transcript_id "TCONS_00022083"; exon_number "2"; oId "CUFF.21803.1"; tss_id "TSS16519"; |
| chr12 | Cufflinks exon | 93477055  | 93477398  | . | - | . | gene_id "XLOC_013018"; transcript_id "TCONS_00022086"; exon_number "1"; oId "CUFF.21811.1"; tss_id "TSS16522"; |
| chr12 | Cufflinks exon | 93663807  | 93663815  | . | - | . | gene_id "XLOC_013018"; transcript_id "TCONS_00022086"; exon_number "2"; oId "CUFF.21811.1"; tss_id "TSS16522"; |
| chr12 | Cufflinks exon | 94659662  | 94664919  | . | - | . | gene_id "XLOC_013038"; transcript_id "TCONS_00022110"; exon_number "1"; oId "CUFF.21890.2"; tss_id "TSS16545"; |
| chr12 | Cufflinks exon | 94669328  | 94669449  | . | - | . | gene_id "XLOC_013038"; transcript_id "TCONS_00022110"; exon_number "2"; oId "CUFF.21890.2"; tss_id "TSS16545"; |
| chr12 | Cufflinks exon | 109489846 | 109490543 | . | - | . | gene_id "XLOC_013154"; transcript_id "TCONS_00022334"; exon_number "1"; oId "CUFF.22376.1"; tss_id "TSS16703"; |
| chr12 | Cufflinks exon | 109491491 | 109491770 | . | - | . | gene_id "XLOC_013154"; transcript_id "TCONS_00022334"; exon_number "2"; oId "CUFF.22376.1"; tss_id "TSS16703"; |
| chr12 | Cufflinks exon | 120881764 | 120882758 | . | - | . | gene_id "XLOC_013260"; transcript_id "TCONS_00022560"; exon_number "1"; oId "CUFF.22753.1"; tss_id "TSS16853"; |
| chr12 | Cufflinks exon | 120884029 | 120884043 | . | - | . | gene_id "XLOC_013260"; transcript_id "TCONS_00022560"; exon_number "2"; oId "CUFF.22753.1"; tss_id "TSS16853"; |
| chr12 | Cufflinks exon | 121041738 | 121041751 | . | - | . | gene_id "XLOC_013260"; transcript_id "TCONS_00022560"; exon_number "3"; oId "CUFF.22753.1"; tss_id "TSS16853"; |
| chr12 | Cufflinks exon | 120928141 | 120929913 | . | - | . | gene_id "XLOC_013262"; transcript_id "TCONS_00022562"; exon_number "1"; oId "CUFF.22765.1"; tss_id "TSS16855"; |
| chr12 | Cufflinks exon | 120933626 | 120933749 | . | - | . | gene_id "XLOC_013262"; transcript_id "TCONS_00022562"; exon_number "2"; oId "CUFF.22765.1"; tss_id "TSS16855"; |
| chr12 | Cufflinks exon | 122233170 | 122233632 | . | - | . | gene_id "XLOC_013287"; transcript_id "TCONS_00022612"; exon_number "1"; oId "CUFF.22872.5"; tss_id "TSS16894"; |
| chr12 | Cufflinks exon | 122234097 | 122234148 | . | - | . | gene_id "XLOC_013287"; transcript_id "TCONS_00022612"; exon_number "2"; oId "CUFF.22872.5"; tss_id "TSS16894"; |
| chr12 | Cufflinks exon | 122237753 | 122237862 | . | - | . | gene_id "XLOC_013287"; transcript_id "TCONS_00022612"; exon_number "3"; oId "CUFF.22872.5"; tss_id "TSS16894"; |
| chr12 | Cufflinks exon | 122239478 | 122239514 | . | - | . | gene_id "XLOC_013287"; transcript_id "TCONS_00022612"; exon_number "4"; oId "CUFF.22872.5"; tss_id "TSS16894"; |
| chr12 | Cufflinks exon | 122239613 | 122239714 | . | - | . | gene_id "XLOC_013287"; transcript_id "TCONS_00022612"; exon_number "5"; oId "CUFF.22872.5"; tss_id "TSS16894"; |
| chr12 | Cufflinks exon | 122240537 | 122240690 | . | - | . | gene_id "XLOC_013287"; transcript_id "TCONS_00022612"; exon_number "6"; oId "CUFF.22872.5"; tss_id "TSS16894"; |
| chr12 | Cufflinks exon | 122240785 | 122241390 | . | - | . | gene_id "XLOC_013287"; transcript_id "TCONS_00022612"; exon_number "7"; oId "CUFF.22872.5"; tss_id "TSS16894"; |
| chr12 | Cufflinks exon | 123632169 | 123634194 | . | - | . | gene_id "XLOC_013323"; transcript_id "TCONS_00022676"; exon_number "1"; oId "CUFF.23007.1"; tss_id "TSS16944"; |
| chr12 | Cufflinks exon | 123634323 | 123634427 | . | - | . | gene_id "XLOC_013323"; transcript_id "TCONS_00022676"; exon_number "2"; oId "CUFF.23007.1"; tss_id "TSS16944"; |

|                                             |   |   |   |                                                                    |  |
|---------------------------------------------|---|---|---|--------------------------------------------------------------------|--|
| "2"; oId "CUFF.23007.1"; tss_id "TSS16944"; |   |   |   |                                                                    |  |
| chr12 Cufflinks exon133507258 133508033     | . | - | . | gene_id "XLOC_013487"; transcript_id "TCONS_00022917"; exon_number |  |
| "1"; oId "CUFF.23460.1"; tss_id "TSS17145"; |   |   |   |                                                                    |  |
| chr12 Cufflinks exon133509081 133509195     | . | - | . | gene_id "XLOC_013487"; transcript_id "TCONS_00022917"; exon_number |  |
| "2"; oId "CUFF.23460.1"; tss_id "TSS17145"; |   |   |   |                                                                    |  |
| chr13 Cufflinks exon26586362 26586540       | . | + | . | gene_id "XLOC_013560"; transcript_id "TCONS_00023043"; exon_number |  |
| "1"; oId "CUFF.23756.4"; tss_id "TSS17238"; |   |   |   |                                                                    |  |
| chr13 Cufflinks exon26586669 26586760       | . | + | . | gene_id "XLOC_013560"; transcript_id "TCONS_00023043"; exon_number |  |
| "2"; oId "CUFF.23756.4"; tss_id "TSS17238"; |   |   |   |                                                                    |  |
| chr13 Cufflinks exon26594026 26600384       | . | + | . | gene_id "XLOC_013560"; transcript_id "TCONS_00023043"; exon_number |  |
| "3"; oId "CUFF.23756.4"; tss_id "TSS17238"; |   |   |   |                                                                    |  |
| chr13 Cufflinks exon26586374 26586572       | . | + | . | gene_id "XLOC_013560"; transcript_id "TCONS_00023044"; exon_number |  |
| "1"; oId "CUFF.23756.5"; tss_id "TSS17238"; |   |   |   |                                                                    |  |
| chr13 Cufflinks exon26586669 26586760       | . | + | . | gene_id "XLOC_013560"; transcript_id "TCONS_00023044"; exon_number |  |
| "2"; oId "CUFF.23756.5"; tss_id "TSS17238"; |   |   |   |                                                                    |  |
| chr13 Cufflinks exon26594026 26600384       | . | + | . | gene_id "XLOC_013560"; transcript_id "TCONS_00023044"; exon_number |  |
| "3"; oId "CUFF.23756.5"; tss_id "TSS17238"; |   |   |   |                                                                    |  |
| chr13 Cufflinks exon26586510 26586541       | . | + | . | gene_id "XLOC_013560"; transcript_id "TCONS_00023045"; exon_number |  |
| "1"; oId "CUFF.23756.6"; tss_id "TSS17239"; |   |   |   |                                                                    |  |
| chr13 Cufflinks exon26586670 26586760       | . | + | . | gene_id "XLOC_013560"; transcript_id "TCONS_00023045"; exon_number |  |
| "2"; oId "CUFF.23756.6"; tss_id "TSS17239"; |   |   |   |                                                                    |  |
| chr13 Cufflinks exon26594026 26600384       | . | + | . | gene_id "XLOC_013560"; transcript_id "TCONS_00023045"; exon_number |  |
| "3"; oId "CUFF.23756.6"; tss_id "TSS17239"; |   |   |   |                                                                    |  |
| chr13 Cufflinks exon26587567 26587581       | . | + | . | gene_id "XLOC_013560"; transcript_id "TCONS_00023046"; exon_number |  |
| "1"; oId "CUFF.23756.7"; tss_id "TSS17240"; |   |   |   |                                                                    |  |
| chr13 Cufflinks exon26594026 26600384       | . | + | . | gene_id "XLOC_013560"; transcript_id "TCONS_00023046"; exon_number |  |
| "2"; oId "CUFF.23756.7"; tss_id "TSS17240"; |   |   |   |                                                                    |  |
| chr13 Cufflinks exon26592067 26592089       | . | + | . | gene_id "XLOC_013560"; transcript_id "TCONS_00023047"; exon_number |  |
| "1"; oId "CUFF.23756.8"; tss_id "TSS17241"; |   |   |   |                                                                    |  |
| chr13 Cufflinks exon26594026 26600384       | . | + | . | gene_id "XLOC_013560"; transcript_id "TCONS_00023047"; exon_number |  |
| "2"; oId "CUFF.23756.8"; tss_id "TSS17241"; |   |   |   |                                                                    |  |
| chr13 Cufflinks exon34526171 34526678       | . | + | . | gene_id "XLOC_013648"; transcript_id "TCONS_00023186"; exon_number |  |
| "1"; oId "CUFF.24096.1"; tss_id "TSS17347"; |   |   |   |                                                                    |  |
| chr13 Cufflinks exon34529242 34530063       | . | + | . | gene_id "XLOC_013648"; transcript_id "TCONS_00023186"; exon_number |  |
| "2"; oId "CUFF.24096.1"; tss_id "TSS17347"; |   |   |   |                                                                    |  |
| chr13 Cufflinks exon47323893 47323918       | . | + | . | gene_id "XLOC_013735"; transcript_id "TCONS_00023323"; exon_number |  |
| "1"; oId "CUFF.24532.2"; tss_id "TSS17453"; |   |   |   |                                                                    |  |
| chr13 Cufflinks exon47324675 47327251       | . | + | . | gene_id "XLOC_013735"; transcript_id "TCONS_00023323"; exon_number |  |
| "2"; oId "CUFF.24532.2"; tss_id "TSS17453"; |   |   |   |                                                                    |  |
| chr13 Cufflinks exon76199143 76200157       | . | + | . | gene_id "XLOC_013879"; transcript_id "TCONS_00023527"; exon_number |  |
| "1"; oId "CUFF.25129.1"; tss_id "TSS17621"; |   |   |   |                                                                    |  |
| chr13 Cufflinks exon76200908 76201040       | . | + | . | gene_id "XLOC_013879"; transcript_id "TCONS_00023527"; exon_number |  |
| "2"; oId "CUFF.25129.1"; tss_id "TSS17621"; |   |   |   |                                                                    |  |



|       |                        |          |   |   |   |                                                                                                                |
|-------|------------------------|----------|---|---|---|----------------------------------------------------------------------------------------------------------------|
| chr13 | Cufflinks exon21727734 | 21729289 | . | - | . | gene_id "XLOC_014132"; transcript_id "TCONS_00023940"; exon_number "1"; oId "CUFF.23602.3"; tss_id "TSS17942"; |
| chr13 | Cufflinks exon21729832 | 21729950 | . | - | . | gene_id "XLOC_014132"; transcript_id "TCONS_00023940"; exon_number "2"; oId "CUFF.23602.3"; tss_id "TSS17942"; |
| chr13 | Cufflinks exon21732061 | 21732264 | . | - | . | gene_id "XLOC_014132"; transcript_id "TCONS_00023940"; exon_number "3"; oId "CUFF.23602.3"; tss_id "TSS17942"; |
| chr13 | Cufflinks exon21734041 | 21734126 | . | - | . | gene_id "XLOC_014132"; transcript_id "TCONS_00023940"; exon_number "4"; oId "CUFF.23602.3"; tss_id "TSS17942"; |
| chr13 | Cufflinks exon21735929 | 21736014 | . | - | . | gene_id "XLOC_014132"; transcript_id "TCONS_00023940"; exon_number "5"; oId "CUFF.23602.3"; tss_id "TSS17942"; |
| chr13 | Cufflinks exon21736446 | 21736468 | . | - | . | gene_id "XLOC_014132"; transcript_id "TCONS_00023940"; exon_number "6"; oId "CUFF.23602.3"; tss_id "TSS17942"; |
| chr13 | Cufflinks exon31186062 | 31188028 | . | - | . | gene_id "XLOC_014240"; transcript_id "TCONS_00024107"; exon_number "1"; oId "CUFF.23948.4"; tss_id "TSS18081"; |
| chr13 | Cufflinks exon31188262 | 31190796 | . | - | . | gene_id "XLOC_014240"; transcript_id "TCONS_00024107"; exon_number "2"; oId "CUFF.23948.4"; tss_id "TSS18081"; |
| chr13 | Cufflinks exon46777342 | 46777365 | . | - | . | gene_id "XLOC_014385"; transcript_id "TCONS_00024364"; exon_number "1"; oId "CUFF.24501.1"; tss_id "TSS18263"; |
| chr13 | Cufflinks exon46784030 | 46785807 | . | - | . | gene_id "XLOC_014385"; transcript_id "TCONS_00024364"; exon_number "2"; oId "CUFF.24501.1"; tss_id "TSS18263"; |
| chr13 | Cufflinks exon49063096 | 49064387 | . | - | . | gene_id "XLOC_014408"; transcript_id "TCONS_00024400"; exon_number "1"; oId "CUFF.24608.8"; tss_id "TSS18291"; |
| chr13 | Cufflinks exon49066576 | 49067127 | . | - | . | gene_id "XLOC_014408"; transcript_id "TCONS_00024400"; exon_number "2"; oId "CUFF.24608.8"; tss_id "TSS18291"; |
| chr13 | Cufflinks exon49063096 | 49064387 | . | - | . | gene_id "XLOC_014408"; transcript_id "TCONS_00024401"; exon_number "1"; oId "CUFF.24608.1"; tss_id "TSS18291"; |
| chr13 | Cufflinks exon49066623 | 49067137 | . | - | . | gene_id "XLOC_014408"; transcript_id "TCONS_00024401"; exon_number "2"; oId "CUFF.24608.1"; tss_id "TSS18291"; |
| chr14 | Cufflinks exon22262602 | 22264080 | . | + | . | gene_id "XLOC_014863"; transcript_id "TCONS_00025140"; exon_number "1"; oId "CUFF.26089.1"; tss_id "TSS18866"; |
| chr14 | Cufflinks exon22264381 | 22264857 | . | + | . | gene_id "XLOC_014863"; transcript_id "TCONS_00025140"; exon_number "2"; oId "CUFF.26089.1"; tss_id "TSS18866"; |
| chr14 | Cufflinks exon22262602 | 22264080 | . | + | . | gene_id "XLOC_014863"; transcript_id "TCONS_00025141"; exon_number "1"; oId "CUFF.26089.2"; tss_id "TSS18866"; |
| chr14 | Cufflinks exon22264887 | 22265335 | . | + | . | gene_id "XLOC_014863"; transcript_id "TCONS_00025141"; exon_number "2"; oId "CUFF.26089.2"; tss_id "TSS18866"; |
| chr14 | Cufflinks exon22262602 | 22264080 | . | + | . | gene_id "XLOC_014863"; transcript_id "TCONS_00025142"; exon_number "1"; oId "CUFF.26089.3"; tss_id "TSS18866"; |
| chr14 | Cufflinks exon22265336 | 22265636 | . | + | . | gene_id "XLOC_014863"; transcript_id "TCONS_00025142"; exon_number "2"; oId "CUFF.26089.3"; tss_id "TSS18866"; |
| chr14 | Cufflinks exon22265764 | 22265878 | . | + | . | gene_id "XLOC_014863"; transcript_id "TCONS_00025142"; exon_number "3"; oId "CUFF.26089.3"; tss_id "TSS18866"; |
| chr14 | Cufflinks exon22267179 | 22267340 | . | + | . | gene_id "XLOC_014863"; transcript_id "TCONS_00025142"; exon_number "4"; oId "CUFF.26089.3"; tss_id "TSS18866"; |



|       |                        |          |   |   |   |                                                                                                                |
|-------|------------------------|----------|---|---|---|----------------------------------------------------------------------------------------------------------------|
| chr14 | Cufflinks exon22850754 | 22850808 | . | - | . | gene_id "XLOC_016134"; transcript_id "TCONS_00027013"; exon_number "3"; oId "CUFF.26136.1"; tss_id "TSS20358"; |
| chr14 | Cufflinks exon22869445 | 22869567 | . | - | . | gene_id "XLOC_016134"; transcript_id "TCONS_00027013"; exon_number "4"; oId "CUFF.26136.1"; tss_id "TSS20358"; |
| chr14 | Cufflinks exon23764886 | 23767667 | . | - | . | gene_id "XLOC_016177"; transcript_id "TCONS_00027088"; exon_number "1"; oId "CUFF.26241.4"; tss_id "TSS20416"; |
| chr14 | Cufflinks exon23768610 | 23768750 | . | - | . | gene_id "XLOC_016177"; transcript_id "TCONS_00027088"; exon_number "2"; oId "CUFF.26241.4"; tss_id "TSS20416"; |
| chr14 | Cufflinks exon23769967 | 23770465 | . | - | . | gene_id "XLOC_016177"; transcript_id "TCONS_00027088"; exon_number "3"; oId "CUFF.26241.4"; tss_id "TSS20416"; |
| chr14 | Cufflinks exon60714032 | 60714181 | . | - | . | gene_id "XLOC_016508"; transcript_id "TCONS_00027621"; exon_number "1"; oId "CUFF.27569.1"; tss_id "TSS20826"; |
| chr14 | Cufflinks exon60715358 | 60715802 | . | - | . | gene_id "XLOC_016508"; transcript_id "TCONS_00027621"; exon_number "2"; oId "CUFF.27569.1"; tss_id "TSS20826"; |
| chr14 | Cufflinks exon61761422 | 61763315 | . | - | . | gene_id "XLOC_016529"; transcript_id "TCONS_00027648"; exon_number "1"; oId "CUFF.27649.3"; tss_id "TSS20850"; |
| chr14 | Cufflinks exon61764918 | 61766463 | . | - | . | gene_id "XLOC_016529"; transcript_id "TCONS_00027648"; exon_number "2"; oId "CUFF.27649.3"; tss_id "TSS20850"; |
| chr14 | Cufflinks exon68862094 | 68863133 | . | - | . | gene_id "XLOC_016616"; transcript_id "TCONS_00027764"; exon_number "1"; oId "CUFF.27937.1"; tss_id "TSS20947"; |
| chr14 | Cufflinks exon68863836 | 68863983 | . | - | . | gene_id "XLOC_016616"; transcript_id "TCONS_00027764"; exon_number "2"; oId "CUFF.27937.1"; tss_id "TSS20947"; |
| chr14 | Cufflinks exon68867016 | 68867188 | . | - | . | gene_id "XLOC_016616"; transcript_id "TCONS_00027764"; exon_number "3"; oId "CUFF.27937.1"; tss_id "TSS20947"; |
| chr14 | Cufflinks exon68868259 | 68868436 | . | - | . | gene_id "XLOC_016616"; transcript_id "TCONS_00027764"; exon_number "4"; oId "CUFF.27937.1"; tss_id "TSS20947"; |
| chr14 | Cufflinks exon68862094 | 68863133 | . | - | . | gene_id "XLOC_016616"; transcript_id "TCONS_00027765"; exon_number "1"; oId "CUFF.27937.2"; tss_id "TSS20948"; |
| chr14 | Cufflinks exon68863897 | 68863983 | . | - | . | gene_id "XLOC_016616"; transcript_id "TCONS_00027765"; exon_number "2"; oId "CUFF.27937.2"; tss_id "TSS20948"; |
| chr14 | Cufflinks exon68867016 | 68867188 | . | - | . | gene_id "XLOC_016616"; transcript_id "TCONS_00027765"; exon_number "3"; oId "CUFF.27937.2"; tss_id "TSS20948"; |
| chr14 | Cufflinks exon68870720 | 68871614 | . | - | . | gene_id "XLOC_016616"; transcript_id "TCONS_00027765"; exon_number "4"; oId "CUFF.27937.2"; tss_id "TSS20948"; |
| chr14 | Cufflinks exon68862094 | 68863133 | . | - | . | gene_id "XLOC_016616"; transcript_id "TCONS_00027766"; exon_number "1"; oId "CUFF.27937.3"; tss_id "TSS20949"; |
| chr14 | Cufflinks exon68863836 | 68863983 | . | - | . | gene_id "XLOC_016616"; transcript_id "TCONS_00027766"; exon_number "2"; oId "CUFF.27937.3"; tss_id "TSS20949"; |
| chr14 | Cufflinks exon68867016 | 68867188 | . | - | . | gene_id "XLOC_016616"; transcript_id "TCONS_00027766"; exon_number "3"; oId "CUFF.27937.3"; tss_id "TSS20949"; |
| chr14 | Cufflinks exon68873227 | 68873279 | . | - | . | gene_id "XLOC_016616"; transcript_id "TCONS_00027766"; exon_number "4"; oId "CUFF.27937.3"; tss_id "TSS20949"; |
| chr14 | Cufflinks exon72890179 | 72891688 | . | - | . | gene_id "XLOC_016684"; transcript_id "TCONS_00027855"; exon_number                                             |

|                                             |   |   |   |                                                                    |  |
|---------------------------------------------|---|---|---|--------------------------------------------------------------------|--|
| "1"; oId "CUFF.28205.2"; tss_id "TSS21024"; |   |   |   |                                                                    |  |
| chr14 Cufflinks exon72894949 72895470       | . | - | . | gene_id "XLOC_016684"; transcript_id "TCONS_00027855"; exon_number |  |
| "2"; oId "CUFF.28205.2"; tss_id "TSS21024"; |   |   |   |                                                                    |  |
| chr14 Cufflinks exon72897043 72897170       | . | - | . | gene_id "XLOC_016684"; transcript_id "TCONS_00027855"; exon_number |  |
| "3"; oId "CUFF.28205.2"; tss_id "TSS21024"; |   |   |   |                                                                    |  |
| chr14 Cufflinks exon72901489 72901611       | . | - | . | gene_id "XLOC_016684"; transcript_id "TCONS_00027855"; exon_number |  |
| "4"; oId "CUFF.28205.2"; tss_id "TSS21024"; |   |   |   |                                                                    |  |
| chr14 Cufflinks exon72906372 72906540       | . | - | . | gene_id "XLOC_016684"; transcript_id "TCONS_00027855"; exon_number |  |
| "5"; oId "CUFF.28205.2"; tss_id "TSS21024"; |   |   |   |                                                                    |  |
| chr14 Cufflinks exon72890179 72891688       | . | - | . | gene_id "XLOC_016684"; transcript_id "TCONS_00027854"; exon_number |  |
| "1"; oId "CUFF.28205.1"; tss_id "TSS21024"; |   |   |   |                                                                    |  |
| chr14 Cufflinks exon72901489 72901611       | . | - | . | gene_id "XLOC_016684"; transcript_id "TCONS_00027854"; exon_number |  |
| "2"; oId "CUFF.28205.1"; tss_id "TSS21024"; |   |   |   |                                                                    |  |
| chr14 Cufflinks exon72906376 72906540       | . | - | . | gene_id "XLOC_016684"; transcript_id "TCONS_00027854"; exon_number |  |
| "3"; oId "CUFF.28205.1"; tss_id "TSS21024"; |   |   |   |                                                                    |  |
| chr14 Cufflinks exon72894354 72895470       | . | - | . | gene_id "XLOC_016684"; transcript_id "TCONS_00027856"; exon_number |  |
| "1"; oId "CUFF.28205.3"; tss_id "TSS21024"; |   |   |   |                                                                    |  |
| chr14 Cufflinks exon72897043 72897170       | . | - | . | gene_id "XLOC_016684"; transcript_id "TCONS_00027856"; exon_number |  |
| "2"; oId "CUFF.28205.3"; tss_id "TSS21024"; |   |   |   |                                                                    |  |
| chr14 Cufflinks exon72901489 72901611       | . | - | . | gene_id "XLOC_016684"; transcript_id "TCONS_00027856"; exon_number |  |
| "3"; oId "CUFF.28205.3"; tss_id "TSS21024"; |   |   |   |                                                                    |  |
| chr14 Cufflinks exon72906372 72906553       | . | - | . | gene_id "XLOC_016684"; transcript_id "TCONS_00027856"; exon_number |  |
| "4"; oId "CUFF.28205.3"; tss_id "TSS21024"; |   |   |   |                                                                    |  |
| chr14 Cufflinks exon73007226 73011378       | . | - | . | gene_id "XLOC_016686"; transcript_id "TCONS_00027868"; exon_number |  |
| "1"; oId "CUFF.28219.3"; tss_id "TSS21026"; |   |   |   |                                                                    |  |
| chr14 Cufflinks exon73012779 73012952       | . | - | . | gene_id "XLOC_016686"; transcript_id "TCONS_00027868"; exon_number |  |
| "2"; oId "CUFF.28219.3"; tss_id "TSS21026"; |   |   |   |                                                                    |  |
| chr14 Cufflinks exon73019288 73019490       | . | - | . | gene_id "XLOC_016686"; transcript_id "TCONS_00027868"; exon_number |  |
| "3"; oId "CUFF.28219.3"; tss_id "TSS21026"; |   |   |   |                                                                    |  |
| chr14 Cufflinks exon73061035 73061155       | . | - | . | gene_id "XLOC_016686"; transcript_id "TCONS_00027868"; exon_number |  |
| "4"; oId "CUFF.28219.3"; tss_id "TSS21026"; |   |   |   |                                                                    |  |
| chr14 Cufflinks exon73007226 73011378       | . | - | . | gene_id "XLOC_016686"; transcript_id "TCONS_00027867"; exon_number |  |
| "1"; oId "CUFF.28219.2"; tss_id "TSS21026"; |   |   |   |                                                                    |  |
| chr14 Cufflinks exon73012779 73012952       | . | - | . | gene_id "XLOC_016686"; transcript_id "TCONS_00027867"; exon_number |  |
| "2"; oId "CUFF.28219.2"; tss_id "TSS21026"; |   |   |   |                                                                    |  |
| chr14 Cufflinks exon73019288 73019490       | . | - | . | gene_id "XLOC_016686"; transcript_id "TCONS_00027867"; exon_number |  |
| "3"; oId "CUFF.28219.2"; tss_id "TSS21026"; |   |   |   |                                                                    |  |
| chr14 Cufflinks exon73029053 73029277       | . | - | . | gene_id "XLOC_016686"; transcript_id "TCONS_00027867"; exon_number |  |
| "4"; oId "CUFF.28219.2"; tss_id "TSS21026"; |   |   |   |                                                                    |  |
| chr14 Cufflinks exon73061035 73061155       | . | - | . | gene_id "XLOC_016686"; transcript_id "TCONS_00027867"; exon_number |  |
| "5"; oId "CUFF.28219.2"; tss_id "TSS21026"; |   |   |   |                                                                    |  |
| chr14 Cufflinks exon75548818 75551389       | . | - | . | gene_id "XLOC_016744"; transcript_id "TCONS_00027966"; exon_number |  |
| "1"; oId "CUFF.28405.2"; tss_id "TSS21101"; |   |   |   |                                                                    |  |

|       |                         |           |   |   |   |                                                                                                                |
|-------|-------------------------|-----------|---|---|---|----------------------------------------------------------------------------------------------------------------|
| chr14 | Cufflinks exon75551562  | 75551626  | . | - | . | gene_id "XLOC_016744"; transcript_id "TCONS_00027966"; exon_number "2"; oId "CUFF.28405.2"; tss_id "TSS21101"; |
| chr14 | Cufflinks exon81570839  | 81572024  | . | - | . | gene_id "XLOC_016788"; transcript_id "TCONS_00028039"; exon_number "1"; oId "CUFF.28679.2"; tss_id "TSS21158"; |
| chr14 | Cufflinks exon81573377  | 81573730  | . | - | . | gene_id "XLOC_016788"; transcript_id "TCONS_00028039"; exon_number "2"; oId "CUFF.28679.2"; tss_id "TSS21158"; |
| chr14 | Cufflinks exon92430989  | 92436237  | . | - | . | gene_id "XLOC_016843"; transcript_id "TCONS_00028154"; exon_number "1"; oId "CUFF.28878.1"; tss_id "TSS21245"; |
| chr14 | Cufflinks exon92439061  | 92439174  | . | - | . | gene_id "XLOC_016843"; transcript_id "TCONS_00028154"; exon_number "2"; oId "CUFF.28878.1"; tss_id "TSS21245"; |
| chr14 | Cufflinks exon92440971  | 92441087  | . | - | . | gene_id "XLOC_016843"; transcript_id "TCONS_00028154"; exon_number "3"; oId "CUFF.28878.1"; tss_id "TSS21245"; |
| chr14 | Cufflinks exon92441516  | 92441630  | . | - | . | gene_id "XLOC_016843"; transcript_id "TCONS_00028154"; exon_number "4"; oId "CUFF.28878.1"; tss_id "TSS21245"; |
| chr14 | Cufflinks exon92441901  | 92441956  | . | - | . | gene_id "XLOC_016843"; transcript_id "TCONS_00028154"; exon_number "5"; oId "CUFF.28878.1"; tss_id "TSS21245"; |
| chr14 | Cufflinks exon92442456  | 92442533  | . | - | . | gene_id "XLOC_016843"; transcript_id "TCONS_00028154"; exon_number "6"; oId "CUFF.28878.1"; tss_id "TSS21245"; |
| chr14 | Cufflinks exon92443470  | 92443595  | . | - | . | gene_id "XLOC_016843"; transcript_id "TCONS_00028154"; exon_number "7"; oId "CUFF.28878.1"; tss_id "TSS21245"; |
| chr14 | Cufflinks exon99635625  | 99638496  | . | - | . | gene_id "XLOC_017017"; transcript_id "TCONS_00028405"; exon_number "1"; oId "CUFF.29347.8"; tss_id "TSS21464"; |
| chr14 | Cufflinks exon99925136  | 99925162  | . | - | . | gene_id "XLOC_017017"; transcript_id "TCONS_00028405"; exon_number "2"; oId "CUFF.29347.8"; tss_id "TSS21464"; |
| chr14 | Cufflinks exon100612369 | 100613244 | . | - | . | gene_id "XLOC_017035"; transcript_id "TCONS_00028428"; exon_number "1"; oId "CUFF.29461.2"; tss_id "TSS21486"; |
| chr14 | Cufflinks exon100613419 | 100613434 | . | - | . | gene_id "XLOC_017035"; transcript_id "TCONS_00028428"; exon_number "2"; oId "CUFF.29461.2"; tss_id "TSS21486"; |
| chr14 | Cufflinks exon100612369 | 100613244 | . | - | . | gene_id "XLOC_017035"; transcript_id "TCONS_00028429"; exon_number "1"; oId "CUFF.29461.5"; tss_id "TSS21487"; |
| chr14 | Cufflinks exon100613781 | 100613843 | . | - | . | gene_id "XLOC_017035"; transcript_id "TCONS_00028429"; exon_number "2"; oId "CUFF.29461.5"; tss_id "TSS21487"; |
| chr14 | Cufflinks exon102260799 | 102263234 | . | - | . | gene_id "XLOC_017067"; transcript_id "TCONS_00028479"; exon_number "1"; oId "CUFF.29558.2"; tss_id "TSS21528"; |
| chr14 | Cufflinks exon102276554 | 102276653 | . | - | . | gene_id "XLOC_017067"; transcript_id "TCONS_00028479"; exon_number "2"; oId "CUFF.29558.2"; tss_id "TSS21528"; |
| chr15 | Cufflinks exon23390722  | 23390901  | . | + | . | gene_id "XLOC_017271"; transcript_id "TCONS_00028788"; exon_number "1"; oId "CUFF.30199.1"; tss_id "TSS21789"; |
| chr15 | Cufflinks exon23390994  | 23391118  | . | + | . | gene_id "XLOC_017271"; transcript_id "TCONS_00028788"; exon_number "2"; oId "CUFF.30199.1"; tss_id "TSS21789"; |
| chr15 | Cufflinks exon23392485  | 23392657  | . | + | . | gene_id "XLOC_017271"; transcript_id "TCONS_00028788"; exon_number "3"; oId "CUFF.30199.1"; tss_id "TSS21789"; |
| chr15 | Cufflinks exon23675988  | 23676006  | . | + | . | gene_id "XLOC_017271"; transcript_id "TCONS_00028788"; exon_number                                             |

|                                                                                                                                     |       |                                                                    |
|-------------------------------------------------------------------------------------------------------------------------------------|-------|--------------------------------------------------------------------|
| "4"; oId "CUFF.30199.1"; tss_id "TSS21789";<br>chr15 Cufflinks exon52471659 52471682<br>"1"; oId "CUFF.31393.1"; tss_id "TSS22202"; | . + . | gene_id "XLOC_017603"; transcript_id "TCONS_00029358"; exon_number |
| chr15 Cufflinks exon52472747 52473195<br>"2"; oId "CUFF.31393.1"; tss_id "TSS22202";                                                | . + . | gene_id "XLOC_017603"; transcript_id "TCONS_00029358"; exon_number |
| chr15 Cufflinks exon52513316 52513891<br>"1"; oId "CUFF.31395.1"; tss_id "TSS22206";                                                | . + . | gene_id "XLOC_017607"; transcript_id "TCONS_00029362"; exon_number |
| chr15 Cufflinks exon52515822 52516764<br>"2"; oId "CUFF.31395.1"; tss_id "TSS22206";                                                | . + . | gene_id "XLOC_017607"; transcript_id "TCONS_00029362"; exon_number |
| chr15 Cufflinks exon58743569 58743785<br>"1"; oId "CUFF.31573.1"; tss_id "TSS22243";                                                | . + . | gene_id "XLOC_017634"; transcript_id "TCONS_00029411"; exon_number |
| chr15 Cufflinks exon58743868 58744797<br>"2"; oId "CUFF.31573.1"; tss_id "TSS22243";                                                | . + . | gene_id "XLOC_017634"; transcript_id "TCONS_00029411"; exon_number |
| chr15 Cufflinks exon82555119 82555273<br>"1"; oId "CUFF.32702.1"; tss_id "TSS22625";                                                | . + . | gene_id "XLOC_017959"; transcript_id "TCONS_00029899"; exon_number |
| chr15 Cufflinks exon82555480 82555529<br>"2"; oId "CUFF.32702.1"; tss_id "TSS22625";                                                | . + . | gene_id "XLOC_017959"; transcript_id "TCONS_00029899"; exon_number |
| chr15 Cufflinks exon82555700 82556092<br>"3"; oId "CUFF.32702.1"; tss_id "TSS22625";                                                | . + . | gene_id "XLOC_017959"; transcript_id "TCONS_00029899"; exon_number |
| chr15 Cufflinks exon82555123 82555529<br>"1"; oId "CUFF.32702.5"; tss_id "TSS22625";                                                | . + . | gene_id "XLOC_017959"; transcript_id "TCONS_00029903"; exon_number |
| chr15 Cufflinks exon82557910 82557931<br>"2"; oId "CUFF.32702.5"; tss_id "TSS22625";                                                | . + . | gene_id "XLOC_017959"; transcript_id "TCONS_00029903"; exon_number |
| chr15 Cufflinks exon82674447 82674501<br>"1"; oId "CUFF.32709.3"; tss_id "TSS22631";                                                | . + . | gene_id "XLOC_017962"; transcript_id "TCONS_00029917"; exon_number |
| chr15 Cufflinks exon82692871 82692927<br>"2"; oId "CUFF.32709.3"; tss_id "TSS22631";                                                | . + . | gene_id "XLOC_017962"; transcript_id "TCONS_00029917"; exon_number |
| chr15 Cufflinks exon82696818 82696957<br>"3"; oId "CUFF.32709.3"; tss_id "TSS22631";                                                | . + . | gene_id "XLOC_017962"; transcript_id "TCONS_00029917"; exon_number |
| chr15 Cufflinks exon82700493 82700572<br>"4"; oId "CUFF.32709.3"; tss_id "TSS22631";                                                | . + . | gene_id "XLOC_017962"; transcript_id "TCONS_00029917"; exon_number |
| chr15 Cufflinks exon82706806 82707816<br>"5"; oId "CUFF.32709.3"; tss_id "TSS22631";                                                | . + . | gene_id "XLOC_017962"; transcript_id "TCONS_00029917"; exon_number |
| chr15 Cufflinks exon83050953 83051043<br>"1"; oId "CUFF.32720.1"; tss_id "TSS22645";                                                | . + . | gene_id "XLOC_017968"; transcript_id "TCONS_00029938"; exon_number |
| chr15 Cufflinks exon83051378 83051533<br>"2"; oId "CUFF.32720.1"; tss_id "TSS22645";                                                | . + . | gene_id "XLOC_017968"; transcript_id "TCONS_00029938"; exon_number |
| chr15 Cufflinks exon85639156 85639201<br>"1"; oId "CUFF.32885.1"; tss_id "TSS22716";                                                | . + . | gene_id "XLOC_018023"; transcript_id "TCONS_00030031"; exon_number |
| chr15 Cufflinks exon85639601 85641034<br>"2"; oId "CUFF.32885.1"; tss_id "TSS22716";                                                | . + . | gene_id "XLOC_018023"; transcript_id "TCONS_00030031"; exon_number |
| chr15 Cufflinks exon93422719 93422728<br>"1"; oId "CUFF.33209.1"; tss_id "TSS22858";                                                | . + . | gene_id "XLOC_018141"; transcript_id "TCONS_00030212"; exon_number |

|       |                        |          |   |   |   |                                                                                                                |
|-------|------------------------|----------|---|---|---|----------------------------------------------------------------------------------------------------------------|
| chr15 | Cufflinks exon93567774 | 93571349 | . | + | . | gene_id "XLOC_018141"; transcript_id "TCONS_00030212"; exon_number "2"; oId "CUFF.33209.1"; tss_id "TSS22858"; |
| chr15 | Cufflinks exon93426073 | 93426416 | . | + | . | gene_id "XLOC_018142"; transcript_id "TCONS_00030214"; exon_number "1"; oId "CUFF.33211.2"; tss_id "TSS22861"; |
| chr15 | Cufflinks exon93428745 | 93428814 | . | + | . | gene_id "XLOC_018142"; transcript_id "TCONS_00030214"; exon_number "2"; oId "CUFF.33211.2"; tss_id "TSS22861"; |
| chr15 | Cufflinks exon93429399 | 93429484 | . | + | . | gene_id "XLOC_018142"; transcript_id "TCONS_00030214"; exon_number "3"; oId "CUFF.33211.2"; tss_id "TSS22861"; |
| chr15 | Cufflinks exon93435234 | 93435302 | . | + | . | gene_id "XLOC_018142"; transcript_id "TCONS_00030214"; exon_number "4"; oId "CUFF.33211.2"; tss_id "TSS22861"; |
| chr15 | Cufflinks exon93440954 | 93441977 | . | + | . | gene_id "XLOC_018142"; transcript_id "TCONS_00030214"; exon_number "5"; oId "CUFF.33211.2"; tss_id "TSS22861"; |
| chr15 | Cufflinks exon93426073 | 93426416 | . | + | . | gene_id "XLOC_018142"; transcript_id "TCONS_00030213"; exon_number "1"; oId "CUFF.33211.1"; tss_id "TSS22861"; |
| chr15 | Cufflinks exon93426815 | 93427008 | . | + | . | gene_id "XLOC_018142"; transcript_id "TCONS_00030213"; exon_number "2"; oId "CUFF.33211.1"; tss_id "TSS22861"; |
| chr15 | Cufflinks exon93428745 | 93428814 | . | + | . | gene_id "XLOC_018142"; transcript_id "TCONS_00030213"; exon_number "3"; oId "CUFF.33211.1"; tss_id "TSS22861"; |
| chr15 | Cufflinks exon93429399 | 93429484 | . | + | . | gene_id "XLOC_018142"; transcript_id "TCONS_00030213"; exon_number "4"; oId "CUFF.33211.1"; tss_id "TSS22861"; |
| chr15 | Cufflinks exon93435234 | 93435302 | . | + | . | gene_id "XLOC_018142"; transcript_id "TCONS_00030213"; exon_number "5"; oId "CUFF.33211.1"; tss_id "TSS22861"; |
| chr15 | Cufflinks exon93440954 | 93441977 | . | + | . | gene_id "XLOC_018142"; transcript_id "TCONS_00030213"; exon_number "6"; oId "CUFF.33211.1"; tss_id "TSS22861"; |
| chr15 | Cufflinks exon94399789 | 94399825 | . | + | . | gene_id "XLOC_018252"; transcript_id "TCONS_00030335"; exon_number "1"; oId "CUFF.33403.1"; tss_id "TSS22977"; |
| chr15 | Cufflinks exon94408603 | 94408877 | . | + | . | gene_id "XLOC_018252"; transcript_id "TCONS_00030335"; exon_number "2"; oId "CUFF.33403.1"; tss_id "TSS22977"; |
| chr15 | Cufflinks exon94410629 | 94410930 | . | + | . | gene_id "XLOC_018252"; transcript_id "TCONS_00030335"; exon_number "3"; oId "CUFF.33403.1"; tss_id "TSS22977"; |
| chr15 | Cufflinks exon94406214 | 94406445 | . | + | . | gene_id "XLOC_018252"; transcript_id "TCONS_00030336"; exon_number "1"; oId "CUFF.33403.3"; tss_id "TSS22978"; |
| chr15 | Cufflinks exon94408603 | 94408877 | . | + | . | gene_id "XLOC_018252"; transcript_id "TCONS_00030336"; exon_number "2"; oId "CUFF.33403.3"; tss_id "TSS22978"; |
| chr15 | Cufflinks exon94412920 | 94413062 | . | + | . | gene_id "XLOC_018252"; transcript_id "TCONS_00030336"; exon_number "3"; oId "CUFF.33403.3"; tss_id "TSS22978"; |
| chr15 | Cufflinks exon94421263 | 94421622 | . | + | . | gene_id "XLOC_018252"; transcript_id "TCONS_00030336"; exon_number "4"; oId "CUFF.33403.3"; tss_id "TSS22978"; |
| chr15 | Cufflinks exon29744482 | 29744929 | . | - | . | gene_id "XLOC_018410"; transcript_id "TCONS_00030589"; exon_number "1"; oId "CUFF.30379.1"; tss_id "TSS23181"; |
| chr15 | Cufflinks exon29745100 | 29745162 | . | - | . | gene_id "XLOC_018410"; transcript_id "TCONS_00030589"; exon_number "2"; oId "CUFF.30379.1"; tss_id "TSS23181"; |
| chr15 | Cufflinks exon34149114 | 34151295 | . | - | . | gene_id "XLOC_018453"; transcript_id "TCONS_00030670"; exon_number                                             |

|                                             |   |   |   |                                                                    |  |
|---------------------------------------------|---|---|---|--------------------------------------------------------------------|--|
| "1"; oId "CUFF.30560.2"; tss_id "TSS23248"; |   |   |   |                                                                    |  |
| chr15 Cufflinks exon34151782 34151836       | . | - | . | gene_id "XLOC_018453"; transcript_id "TCONS_00030670"; exon_number |  |
| "2"; oId "CUFF.30560.2"; tss_id "TSS23248"; |   |   |   |                                                                    |  |
| chr15 Cufflinks exon34149114 34151295       | . | - | . | gene_id "XLOC_018453"; transcript_id "TCONS_00030671"; exon_number |  |
| "1"; oId "CUFF.30560.3"; tss_id "TSS23249"; |   |   |   |                                                                    |  |
| chr15 Cufflinks exon34151889 34152346       | . | - | . | gene_id "XLOC_018453"; transcript_id "TCONS_00030671"; exon_number |  |
| "2"; oId "CUFF.30560.3"; tss_id "TSS23249"; |   |   |   |                                                                    |  |
| chr15 Cufflinks exon34149114 34151295       | . | - | . | gene_id "XLOC_018453"; transcript_id "TCONS_00030672"; exon_number |  |
| "1"; oId "CUFF.30560.1"; tss_id "TSS23250"; |   |   |   |                                                                    |  |
| chr15 Cufflinks exon34156958 34157181       | . | - | . | gene_id "XLOC_018453"; transcript_id "TCONS_00030672"; exon_number |  |
| "2"; oId "CUFF.30560.1"; tss_id "TSS23250"; |   |   |   |                                                                    |  |
| chr15 Cufflinks exon34157779 34157842       | . | - | . | gene_id "XLOC_018453"; transcript_id "TCONS_00030672"; exon_number |  |
| "3"; oId "CUFF.30560.1"; tss_id "TSS23250"; |   |   |   |                                                                    |  |
| chr15 Cufflinks exon35270542 35272615       | . | - | . | gene_id "XLOC_018486"; transcript_id "TCONS_00030725"; exon_number |  |
| "1"; oId "CUFF.30623.2"; tss_id "TSS23296"; |   |   |   |                                                                    |  |
| chr15 Cufflinks exon35450136 35450165       | . | - | . | gene_id "XLOC_018486"; transcript_id "TCONS_00030725"; exon_number |  |
| "2"; oId "CUFF.30623.2"; tss_id "TSS23296"; |   |   |   |                                                                    |  |
| chr15 Cufflinks exon40577615 40578275       | . | - | . | gene_id "XLOC_018536"; transcript_id "TCONS_00030800"; exon_number |  |
| "1"; oId "CUFF.30782.1"; tss_id "TSS23354"; |   |   |   |                                                                    |  |
| chr15 Cufflinks exon40579279 40579531       | . | - | . | gene_id "XLOC_018536"; transcript_id "TCONS_00030800"; exon_number |  |
| "2"; oId "CUFF.30782.1"; tss_id "TSS23354"; |   |   |   |                                                                    |  |
| chr15 Cufflinks exon42450899 42453027       | . | - | . | gene_id "XLOC_018575"; transcript_id "TCONS_00030874"; exon_number |  |
| "1"; oId "CUFF.30928.1"; tss_id "TSS23402"; |   |   |   |                                                                    |  |
| chr15 Cufflinks exon42453672 42453787       | . | - | . | gene_id "XLOC_018575"; transcript_id "TCONS_00030874"; exon_number |  |
| "2"; oId "CUFF.30928.1"; tss_id "TSS23402"; |   |   |   |                                                                    |  |
| chr15 Cufflinks exon42471470 42471515       | . | - | . | gene_id "XLOC_018576"; transcript_id "TCONS_00030876"; exon_number |  |
| "1"; oId "CUFF.30929.1"; tss_id "TSS23404"; |   |   |   |                                                                    |  |
| chr15 Cufflinks exon42475676 42475868       | . | - | . | gene_id "XLOC_018576"; transcript_id "TCONS_00030876"; exon_number |  |
| "2"; oId "CUFF.30929.1"; tss_id "TSS23404"; |   |   |   |                                                                    |  |
| chr15 Cufflinks exon52015261 52015846       | . | - | . | gene_id "XLOC_018722"; transcript_id "TCONS_00031144"; exon_number |  |
| "1"; oId "CUFF.31365.1"; tss_id "TSS23595"; |   |   |   |                                                                    |  |
| chr15 Cufflinks exon52016987 52017150       | . | - | . | gene_id "XLOC_018722"; transcript_id "TCONS_00031144"; exon_number |  |
| "2"; oId "CUFF.31365.1"; tss_id "TSS23595"; |   |   |   |                                                                    |  |
| chr15 Cufflinks exon52156465 52156483       | . | - | . | gene_id "XLOC_018722"; transcript_id "TCONS_00031144"; exon_number |  |
| "3"; oId "CUFF.31365.1"; tss_id "TSS23595"; |   |   |   |                                                                    |  |
| chr15 Cufflinks exon76026091 76027644       | . | - | . | gene_id "XLOC_019021"; transcript_id "TCONS_00031686"; exon_number |  |
| "1"; oId "CUFF.32373.5"; tss_id "TSS23989"; |   |   |   |                                                                    |  |
| chr15 Cufflinks exon76030728 76030933       | . | - | . | gene_id "XLOC_019021"; transcript_id "TCONS_00031686"; exon_number |  |
| "2"; oId "CUFF.32373.5"; tss_id "TSS23989"; |   |   |   |                                                                    |  |
| chr15 Cufflinks exon76031066 76031098       | . | - | . | gene_id "XLOC_019021"; transcript_id "TCONS_00031686"; exon_number |  |
| "3"; oId "CUFF.32373.5"; tss_id "TSS23989"; |   |   |   |                                                                    |  |
| chr15 Cufflinks exon82768175 82768515       | . | - | . | gene_id "XLOC_019115"; transcript_id "TCONS_00031852"; exon_number |  |
| "1"; oId "CUFF.32713.1"; tss_id "TSS24110"; |   |   |   |                                                                    |  |



|       |                |           |           |   |   |   |                                                                                                                |
|-------|----------------|-----------|-----------|---|---|---|----------------------------------------------------------------------------------------------------------------|
| chr15 | Cufflinks exon | 83006289  | 83006355  | . | - | . | gene_id "XLOC_019115"; transcript_id "TCONS_00031852"; exon_number "2"; oId "CUFF.32713.1"; tss_id "TSS24110"; |
| chr15 | Cufflinks exon | 83145167  | 83145437  | . | - | . | gene_id "XLOC_019115"; transcript_id "TCONS_00031852"; exon_number "3"; oId "CUFF.32713.1"; tss_id "TSS24110"; |
| chr15 | Cufflinks exon | 100796736 | 100797279 | . | - | . | gene_id "XLOC_019304"; transcript_id "TCONS_00032180"; exon_number "1"; oId "CUFF.33583.1"; tss_id "TSS24336"; |
| chr15 | Cufflinks exon | 100797509 | 100797594 | . | - | . | gene_id "XLOC_019304"; transcript_id "TCONS_00032180"; exon_number "2"; oId "CUFF.33583.1"; tss_id "TSS24336"; |
| chr15 | Cufflinks exon | 100796736 | 100797279 | . | - | . | gene_id "XLOC_019304"; transcript_id "TCONS_00032181"; exon_number "1"; oId "CUFF.33583.2"; tss_id "TSS24337"; |
| chr15 | Cufflinks exon | 100798187 | 100798300 | . | - | . | gene_id "XLOC_019304"; transcript_id "TCONS_00032181"; exon_number "2"; oId "CUFF.33583.2"; tss_id "TSS24337"; |
| chr16 | Cufflinks exon | 541658    | 541993    | . | + | . | gene_id "XLOC_019355"; transcript_id "TCONS_00032271"; exon_number "1"; oId "CUFF.33718.1"; tss_id "TSS24407"; |
| chr16 | Cufflinks exon | 542015    | 542038    | . | + | . | gene_id "XLOC_019355"; transcript_id "TCONS_00032271"; exon_number "2"; oId "CUFF.33718.1"; tss_id "TSS24407"; |
| chr16 | Cufflinks exon | 551468    | 551547    | . | + | . | gene_id "XLOC_019359"; transcript_id "TCONS_00032275"; exon_number "1"; oId "CUFF.33722.1"; tss_id "TSS24411"; |
| chr16 | Cufflinks exon | 551619    | 552992    | . | + | . | gene_id "XLOC_019359"; transcript_id "TCONS_00032275"; exon_number "2"; oId "CUFF.33722.1"; tss_id "TSS24411"; |
| chr16 | Cufflinks exon | 1458391   | 1458893   | . | + | . | gene_id "XLOC_019393"; transcript_id "TCONS_00032331"; exon_number "1"; oId "CUFF.33813.1"; tss_id "TSS24451"; |
| chr16 | Cufflinks exon | 1461930   | 1462243   | . | + | . | gene_id "XLOC_019393"; transcript_id "TCONS_00032331"; exon_number "2"; oId "CUFF.33813.1"; tss_id "TSS24451"; |
| chr16 | Cufflinks exon | 2390923   | 2391374   | . | + | . | gene_id "XLOC_019433"; transcript_id "TCONS_00032396"; exon_number "1"; oId "CUFF.33920.4"; tss_id "TSS24504"; |
| chr16 | Cufflinks exon | 2395176   | 2395187   | . | + | . | gene_id "XLOC_019433"; transcript_id "TCONS_00032396"; exon_number "2"; oId "CUFF.33920.4"; tss_id "TSS24504"; |
| chr16 | Cufflinks exon | 9058048   | 9058433   | . | + | . | gene_id "XLOC_019541"; transcript_id "TCONS_00032576"; exon_number "1"; oId "CUFF.34266.4"; tss_id "TSS24635"; |
| chr16 | Cufflinks exon | 9060610   | 9061833   | . | + | . | gene_id "XLOC_019541"; transcript_id "TCONS_00032576"; exon_number "2"; oId "CUFF.34266.4"; tss_id "TSS24635"; |
| chr16 | Cufflinks exon | 10479883  | 10479979  | . | + | . | gene_id "XLOC_019547"; transcript_id "TCONS_00032585"; exon_number "1"; oId "CUFF.34286.1"; tss_id "TSS24642"; |
| chr16 | Cufflinks exon | 10481001  | 10481147  | . | + | . | gene_id "XLOC_019547"; transcript_id "TCONS_00032585"; exon_number "2"; oId "CUFF.34286.1"; tss_id "TSS24642"; |
| chr16 | Cufflinks exon | 10481235  | 10481566  | . | + | . | gene_id "XLOC_019547"; transcript_id "TCONS_00032585"; exon_number "3"; oId "CUFF.34286.1"; tss_id "TSS24642"; |
| chr16 | Cufflinks exon | 17228361  | 17228407  | . | + | . | gene_id "XLOC_019612"; transcript_id "TCONS_00032726"; exon_number "1"; oId "CUFF.34510.1"; tss_id "TSS24727"; |
| chr16 | Cufflinks exon | 17231373  | 17231471  | . | + | . | gene_id "XLOC_019612"; transcript_id "TCONS_00032726"; exon_number "2"; oId "CUFF.34510.1"; tss_id "TSS24727"; |
| chr16 | Cufflinks exon | 17232099  | 17232589  | . | + | . | gene_id "XLOC_019612"; transcript_id "TCONS_00032726"; exon_number "3"; oId "CUFF.34510.1"; tss_id "TSS24727"; |

|                                             |   |   |   |                                                                    |  |
|---------------------------------------------|---|---|---|--------------------------------------------------------------------|--|
| "3"; oId "CUFF.34510.1"; tss_id "TSS24727"; |   |   |   |                                                                    |  |
| chr16 Cufflinks exon21127782 21127858       | . | + | . | gene_id "XLOC_019636"; transcript_id "TCONS_00032760"; exon_number |  |
| "1"; oId "CUFF.34611.3"; tss_id "TSS24754"; |   |   |   |                                                                    |  |
| chr16 Cufflinks exon21132233 21132614       | . | + | . | gene_id "XLOC_019636"; transcript_id "TCONS_00032760"; exon_number |  |
| "2"; oId "CUFF.34611.3"; tss_id "TSS24754"; |   |   |   |                                                                    |  |
| chr16 Cufflinks exon31371790 31371983       | . | + | . | gene_id "XLOC_019809"; transcript_id "TCONS_00033092"; exon_number |  |
| "1"; oId "CUFF.35397.1"; tss_id "TSS24983"; |   |   |   |                                                                    |  |
| chr16 Cufflinks exon31372101 31372381       | . | + | . | gene_id "XLOC_019809"; transcript_id "TCONS_00033092"; exon_number |  |
| "2"; oId "CUFF.35397.1"; tss_id "TSS24983"; |   |   |   |                                                                    |  |
| chr16 Cufflinks exon54073305 54073346       | . | + | . | gene_id "XLOC_019875"; transcript_id "TCONS_00033214"; exon_number |  |
| "1"; oId "CUFF.35638.1"; tss_id "TSS25064"; |   |   |   |                                                                    |  |
| chr16 Cufflinks exon54073458 54074285       | . | + | . | gene_id "XLOC_019875"; transcript_id "TCONS_00033214"; exon_number |  |
| "2"; oId "CUFF.35638.1"; tss_id "TSS25064"; |   |   |   |                                                                    |  |
| chr16 Cufflinks exon66605115 66605173       | . | + | . | gene_id "XLOC_019945"; transcript_id "TCONS_00033352"; exon_number |  |
| "1"; oId "CUFF.35871.1"; tss_id "TSS25155"; |   |   |   |                                                                    |  |
| chr16 Cufflinks exon66608843 66610957       | . | + | . | gene_id "XLOC_019945"; transcript_id "TCONS_00033352"; exon_number |  |
| "2"; oId "CUFF.35871.1"; tss_id "TSS25155"; |   |   |   |                                                                    |  |
| chr16 Cufflinks exon67518234 67518435       | . | + | . | gene_id "XLOC_019979"; transcript_id "TCONS_00033425"; exon_number |  |
| "1"; oId "CUFF.35964.8"; tss_id "TSS25200"; |   |   |   |                                                                    |  |
| chr16 Cufflinks exon67521858 67522007       | . | + | . | gene_id "XLOC_019979"; transcript_id "TCONS_00033425"; exon_number |  |
| "2"; oId "CUFF.35964.8"; tss_id "TSS25200"; |   |   |   |                                                                    |  |
| chr16 Cufflinks exon68414477 68415399       | . | + | . | gene_id "XLOC_020006"; transcript_id "TCONS_00033471"; exon_number |  |
| "1"; oId "CUFF.36053.1"; tss_id "TSS25235"; |   |   |   |                                                                    |  |
| chr16 Cufflinks exon68418873 68419034       | . | + | . | gene_id "XLOC_020006"; transcript_id "TCONS_00033471"; exon_number |  |
| "2"; oId "CUFF.36053.1"; tss_id "TSS25235"; |   |   |   |                                                                    |  |
| chr16 Cufflinks exon79123852 79123982       | . | + | . | gene_id "XLOC_020119"; transcript_id "TCONS_00033667"; exon_number |  |
| "1"; oId "CUFF.36546.1"; tss_id "TSS25361"; |   |   |   |                                                                    |  |
| chr16 Cufflinks exon79135032 79135273       | . | + | . | gene_id "XLOC_020119"; transcript_id "TCONS_00033667"; exon_number |  |
| "2"; oId "CUFF.36546.1"; tss_id "TSS25361"; |   |   |   |                                                                    |  |
| chr16 Cufflinks exon79123852 79123982       | . | + | . | gene_id "XLOC_020119"; transcript_id "TCONS_00033668"; exon_number |  |
| "1"; oId "CUFF.36546.2"; tss_id "TSS25361"; |   |   |   |                                                                    |  |
| chr16 Cufflinks exon79144580 79144737       | . | + | . | gene_id "XLOC_020119"; transcript_id "TCONS_00033668"; exon_number |  |
| "2"; oId "CUFF.36546.2"; tss_id "TSS25361"; |   |   |   |                                                                    |  |
| chr16 Cufflinks exon90224513 90224599       | . | + | . | gene_id "XLOC_020329"; transcript_id "TCONS_00034017"; exon_number |  |
| "1"; oId "CUFF.37123.2"; tss_id "TSS25621"; |   |   |   |                                                                    |  |
| chr16 Cufflinks exon90224800 90224996       | . | + | . | gene_id "XLOC_020329"; transcript_id "TCONS_00034017"; exon_number |  |
| "2"; oId "CUFF.37123.2"; tss_id "TSS25621"; |   |   |   |                                                                    |  |
| chr16 Cufflinks exon90225841 90225940       | . | + | . | gene_id "XLOC_020329"; transcript_id "TCONS_00034017"; exon_number |  |
| "3"; oId "CUFF.37123.2"; tss_id "TSS25621"; |   |   |   |                                                                    |  |
| chr16 Cufflinks exon20908095 20909196       | . | - | . | gene_id "XLOC_020624"; transcript_id "TCONS_00034552"; exon_number |  |
| "1"; oId "CUFF.34607.1"; tss_id "TSS26012"; |   |   |   |                                                                    |  |
| chr16 Cufflinks exon20910045 20910101       | . | - | . | gene_id "XLOC_020624"; transcript_id "TCONS_00034552"; exon_number |  |
| "2"; oId "CUFF.34607.1"; tss_id "TSS26012"; |   |   |   |                                                                    |  |

|       |                |          |          |   |   |   |                                                                                                                |
|-------|----------------|----------|----------|---|---|---|----------------------------------------------------------------------------------------------------------------|
| chr16 | Cufflinks exon | 21892067 | 21892193 | . | - | . | gene_id "XLOC_020650"; transcript_id "TCONS_00034605"; exon_number "1"; oId "CUFF.34697.1"; tss_id "TSS26051"; |
| chr16 | Cufflinks exon | 21893166 | 21893272 | . | - | . | gene_id "XLOC_020650"; transcript_id "TCONS_00034605"; exon_number "2"; oId "CUFF.34697.1"; tss_id "TSS26051"; |
| chr16 | Cufflinks exon | 21910213 | 21910432 | . | - | . | gene_id "XLOC_020656"; transcript_id "TCONS_00034621"; exon_number "1"; oId "CUFF.34705.2"; tss_id "TSS26061"; |
| chr16 | Cufflinks exon | 21912863 | 21913035 | . | - | . | gene_id "XLOC_020656"; transcript_id "TCONS_00034621"; exon_number "2"; oId "CUFF.34705.2"; tss_id "TSS26061"; |
| chr16 | Cufflinks exon | 21914770 | 21914814 | . | - | . | gene_id "XLOC_020656"; transcript_id "TCONS_00034621"; exon_number "3"; oId "CUFF.34705.2"; tss_id "TSS26061"; |
| chr16 | Cufflinks exon | 21910213 | 21910329 | . | - | . | gene_id "XLOC_020656"; transcript_id "TCONS_00034622"; exon_number "1"; oId "CUFF.34705.1"; tss_id "TSS26061"; |
| chr16 | Cufflinks exon | 21912947 | 21913035 | . | - | . | gene_id "XLOC_020656"; transcript_id "TCONS_00034622"; exon_number "2"; oId "CUFF.34705.1"; tss_id "TSS26061"; |
| chr16 | Cufflinks exon | 21914770 | 21914868 | . | - | . | gene_id "XLOC_020656"; transcript_id "TCONS_00034622"; exon_number "3"; oId "CUFF.34705.1"; tss_id "TSS26061"; |
| chr16 | Cufflinks exon | 28890278 | 28890425 | . | - | . | gene_id "XLOC_020722"; transcript_id "TCONS_00034732"; exon_number "1"; oId "CUFF.35017.1"; tss_id "TSS26152"; |
| chr16 | Cufflinks exon | 28890863 | 28891242 | . | - | . | gene_id "XLOC_020722"; transcript_id "TCONS_00034732"; exon_number "2"; oId "CUFF.35017.1"; tss_id "TSS26152"; |
| chr16 | Cufflinks exon | 49880799 | 49882012 | . | - | . | gene_id "XLOC_020870"; transcript_id "TCONS_00034962"; exon_number "1"; oId "CUFF.35571.1"; tss_id "TSS26331"; |
| chr16 | Cufflinks exon | 49882928 | 49883083 | . | - | . | gene_id "XLOC_020870"; transcript_id "TCONS_00034962"; exon_number "2"; oId "CUFF.35571.1"; tss_id "TSS26331"; |
| chr16 | Cufflinks exon | 49887702 | 49889457 | . | - | . | gene_id "XLOC_020870"; transcript_id "TCONS_00034962"; exon_number "3"; oId "CUFF.35571.1"; tss_id "TSS26331"; |
| chr16 | Cufflinks exon | 67551609 | 67552288 | . | - | . | gene_id "XLOC_021012"; transcript_id "TCONS_00035207"; exon_number "1"; oId "CUFF.35971.2"; tss_id "TSS26522"; |
| chr16 | Cufflinks exon | 67555871 | 67555903 | . | - | . | gene_id "XLOC_021012"; transcript_id "TCONS_00035207"; exon_number "2"; oId "CUFF.35971.2"; tss_id "TSS26522"; |
| chr16 | Cufflinks exon | 67551609 | 67552290 | . | - | . | gene_id "XLOC_021012"; transcript_id "TCONS_00035209"; exon_number "1"; oId "CUFF.35971.3"; tss_id "TSS26523"; |
| chr16 | Cufflinks exon | 67562222 | 67562648 | . | - | . | gene_id "XLOC_021012"; transcript_id "TCONS_00035209"; exon_number "2"; oId "CUFF.35971.3"; tss_id "TSS26523"; |
| chr16 | Cufflinks exon | 67551609 | 67552288 | . | - | . | gene_id "XLOC_021012"; transcript_id "TCONS_00035208"; exon_number "1"; oId "CUFF.35971.1"; tss_id "TSS26523"; |
| chr16 | Cufflinks exon | 67562220 | 67562648 | . | - | . | gene_id "XLOC_021012"; transcript_id "TCONS_00035208"; exon_number "2"; oId "CUFF.35971.1"; tss_id "TSS26523"; |
| chr16 | Cufflinks exon | 72136167 | 72136968 | . | - | . | gene_id "XLOC_021093"; transcript_id "TCONS_00035389"; exon_number "1"; oId "CUFF.36280.1"; tss_id "TSS26641"; |
| chr16 | Cufflinks exon | 72137301 | 72137337 | . | - | . | gene_id "XLOC_021093"; transcript_id "TCONS_00035389"; exon_number "2"; oId "CUFF.36280.1"; tss_id "TSS26641"; |
| chr16 | Cufflinks exon | 75135654 | 75137715 | . | - | . | gene_id "XLOC_021146"; transcript_id "TCONS_00035458"; exon_number                                             |

"1"; oId "CUFF.36453.1"; tss\_id "TSS26703";  
chr16 Cufflinks exon75312902 75312920 . - . gene\_id "XLOC\_021146"; transcript\_id "TCONS\_00035458"; exon\_number  
"2"; oId "CUFF.36453.1"; tss\_id "TSS26703";  
chr16 Cufflinks exon89003460 89003546 . - . gene\_id "XLOC\_021319"; transcript\_id "TCONS\_00035733"; exon\_number  
"1"; oId "CUFF.36977.1"; tss\_id "TSS26921";  
chr16 Cufflinks exon89003994 89004148 . - . gene\_id "XLOC\_021319"; transcript\_id "TCONS\_00035733"; exon\_number  
"2"; oId "CUFF.36977.1"; tss\_id "TSS26921";  
chr16 Cufflinks exon89004852 89005064 . - . gene\_id "XLOC\_021319"; transcript\_id "TCONS\_00035733"; exon\_number  
"3"; oId "CUFF.36977.1"; tss\_id "TSS26921";  
chr16 Cufflinks exon89008180 89008193 . - . gene\_id "XLOC\_021319"; transcript\_id "TCONS\_00035733"; exon\_number  
"4"; oId "CUFF.36977.1"; tss\_id "TSS26921";  
chr17 Cufflinks exon4345764 4345920 . + . gene\_id "XLOC\_021417"; transcript\_id "TCONS\_00035891"; exon\_number "1"; oId  
"CUFF.37357.1"; tss\_id "TSS27043";  
chr17 Cufflinks exon4346070 4346331 . + . gene\_id "XLOC\_021417"; transcript\_id "TCONS\_00035891"; exon\_number "2"; oId  
"CUFF.37357.1"; tss\_id "TSS27043";  
chr17 Cufflinks exon16342109 16342374 . + . gene\_id "XLOC\_021573"; transcript\_id "TCONS\_00036158"; exon\_number  
"1"; oId "CUFF.38022.1"; tss\_id "TSS27240";  
chr17 Cufflinks exon16342641 16343567 . + . gene\_id "XLOC\_021573"; transcript\_id "TCONS\_00036158"; exon\_number  
"2"; oId "CUFF.38022.1"; tss\_id "TSS27240";  
chr17 Cufflinks exon16344388 16344444 . + . gene\_id "XLOC\_021573"; transcript\_id "TCONS\_00036158"; exon\_number  
"3"; oId "CUFF.38022.1"; tss\_id "TSS27240";  
chr17 Cufflinks exon16344682 16345340 . + . gene\_id "XLOC\_021573"; transcript\_id "TCONS\_00036158"; exon\_number  
"4"; oId "CUFF.38022.1"; tss\_id "TSS27240";  
chr17 Cufflinks exon17207228 17207791 . + . gene\_id "XLOC\_021598"; transcript\_id "TCONS\_00036198"; exon\_number  
"1"; oId "CUFF.38090.2"; tss\_id "TSS27269";  
chr17 Cufflinks exon17208168 17209091 . + . gene\_id "XLOC\_021598"; transcript\_id "TCONS\_00036198"; exon\_number  
"2"; oId "CUFF.38090.2"; tss\_id "TSS27269";  
chr17 Cufflinks exon31149489 31149880 . + . gene\_id "XLOC\_021804"; transcript\_id "TCONS\_00036542"; exon\_number  
"1"; oId "CUFF.38667.1"; tss\_id "TSS27529";  
chr17 Cufflinks exon31281570 31281580 . + . gene\_id "XLOC\_021804"; transcript\_id "TCONS\_00036542"; exon\_number  
"2"; oId "CUFF.38667.1"; tss\_id "TSS27529";  
chr17 Cufflinks exon37081421 37082144 . + . gene\_id "XLOC\_021883"; transcript\_id "TCONS\_00036674"; exon\_number  
"1"; oId "CUFF.38936.2"; tss\_id "TSS27629";  
chr17 Cufflinks exon37082670 37085637 . + . gene\_id "XLOC\_021883"; transcript\_id "TCONS\_00036674"; exon\_number  
"2"; oId "CUFF.38936.2"; tss\_id "TSS27629";  
chr17 Cufflinks exon47903511 47903513 . + . gene\_id "XLOC\_022146"; transcript\_id "TCONS\_00037138"; exon\_number  
"1"; oId "CUFF.39928.3"; tss\_id "TSS27973";  
chr17 Cufflinks exon47904060 47904161 . + . gene\_id "XLOC\_022146"; transcript\_id "TCONS\_00037138"; exon\_number  
"2"; oId "CUFF.39928.3"; tss\_id "TSS27973";  
chr17 Cufflinks exon47904763 47906458 . + . gene\_id "XLOC\_022146"; transcript\_id "TCONS\_00037138"; exon\_number  
"3"; oId "CUFF.39928.3"; tss\_id "TSS27973";  
chr17 Cufflinks exon48424148 48424295 . + . gene\_id "XLOC\_022162"; transcript\_id "TCONS\_00037166"; exon\_number  
"1"; oId "CUFF.39968.1"; tss\_id "TSS27991";

|       |                        |          |   |   |   |                                                                                                                |
|-------|------------------------|----------|---|---|---|----------------------------------------------------------------------------------------------------------------|
| chr17 | Cufflinks exon48424621 | 48424720 | . | + | . | gene_id "XLOC_022162"; transcript_id "TCONS_00037166"; exon_number "2"; oId "CUFF.39968.1"; tss_id "TSS27991"; |
| chr17 | Cufflinks exon48425245 | 48425314 | . | + | . | gene_id "XLOC_022162"; transcript_id "TCONS_00037166"; exon_number "3"; oId "CUFF.39968.1"; tss_id "TSS27991"; |
| chr17 | Cufflinks exon54320332 | 54331581 | . | + | . | gene_id "XLOC_022208"; transcript_id "TCONS_00037240"; exon_number "1"; oId "CUFF.40098.1"; tss_id "TSS28046"; |
| chr17 | Cufflinks exon54335297 | 54336325 | . | + | . | gene_id "XLOC_022208"; transcript_id "TCONS_00037240"; exon_number "2"; oId "CUFF.40098.1"; tss_id "TSS28046"; |
| chr17 | Cufflinks exon64314560 | 64314759 | . | + | . | gene_id "XLOC_022327"; transcript_id "TCONS_00037437"; exon_number "1"; oId "CUFF.40596.1"; tss_id "TSS28190"; |
| chr17 | Cufflinks exon64316073 | 64316545 | . | + | . | gene_id "XLOC_022327"; transcript_id "TCONS_00037437"; exon_number "2"; oId "CUFF.40596.1"; tss_id "TSS28190"; |
| chr17 | Cufflinks exon72439205 | 72439273 | . | + | . | gene_id "XLOC_022415"; transcript_id "TCONS_00037579"; exon_number "1"; oId "CUFF.40802.2"; tss_id "TSS28300"; |
| chr17 | Cufflinks exon72439957 | 72440051 | . | + | . | gene_id "XLOC_022415"; transcript_id "TCONS_00037579"; exon_number "2"; oId "CUFF.40802.2"; tss_id "TSS28300"; |
| chr17 | Cufflinks exon72442988 | 72443568 | . | + | . | gene_id "XLOC_022415"; transcript_id "TCONS_00037579"; exon_number "3"; oId "CUFF.40802.2"; tss_id "TSS28300"; |
| chr17 | Cufflinks exon72475239 | 72475322 | . | + | . | gene_id "XLOC_022416"; transcript_id "TCONS_00037587"; exon_number "1"; oId "CUFF.40804.7"; tss_id "TSS28304"; |
| chr17 | Cufflinks exon72477428 | 72477465 | . | + | . | gene_id "XLOC_022416"; transcript_id "TCONS_00037587"; exon_number "2"; oId "CUFF.40804.7"; tss_id "TSS28304"; |
| chr17 | Cufflinks exon72477865 | 72477972 | . | + | . | gene_id "XLOC_022416"; transcript_id "TCONS_00037587"; exon_number "3"; oId "CUFF.40804.7"; tss_id "TSS28304"; |
| chr17 | Cufflinks exon72480140 | 72480937 | . | + | . | gene_id "XLOC_022416"; transcript_id "TCONS_00037587"; exon_number "4"; oId "CUFF.40804.7"; tss_id "TSS28304"; |
| chr17 | Cufflinks exon73780920 | 73781065 | . | + | . | gene_id "XLOC_022459"; transcript_id "TCONS_00037652"; exon_number "1"; oId "CUFF.40934.1"; tss_id "TSS28353"; |
| chr17 | Cufflinks exon73787841 | 73788100 | . | + | . | gene_id "XLOC_022459"; transcript_id "TCONS_00037652"; exon_number "2"; oId "CUFF.40934.1"; tss_id "TSS28353"; |
| chr17 | Cufflinks exon73788394 | 73788559 | . | + | . | gene_id "XLOC_022459"; transcript_id "TCONS_00037652"; exon_number "3"; oId "CUFF.40934.1"; tss_id "TSS28353"; |
| chr17 | Cufflinks exon73789524 | 73790279 | . | + | . | gene_id "XLOC_022459"; transcript_id "TCONS_00037652"; exon_number "4"; oId "CUFF.40934.1"; tss_id "TSS28353"; |
| chr17 | Cufflinks exon3605435  | 3606636  | . | - | . | gene_id "XLOC_022712"; transcript_id "TCONS_00038099"; exon_number "1"; oId "CUFF.37313.1"; tss_id "TSS28695"; |
| chr17 | Cufflinks exon3608392  | 3608488  | . | - | . | gene_id "XLOC_022712"; transcript_id "TCONS_00038099"; exon_number "2"; oId "CUFF.37313.1"; tss_id "TSS28695"; |
| chr17 | Cufflinks exon3608720  | 3608939  | . | - | . | gene_id "XLOC_022712"; transcript_id "TCONS_00038099"; exon_number "3"; oId "CUFF.37313.1"; tss_id "TSS28695"; |
| chr17 | Cufflinks exon3618031  | 3618236  | . | - | . | gene_id "XLOC_022712"; transcript_id "TCONS_00038099"; exon_number "4"; oId "CUFF.37313.1"; tss_id "TSS28695"; |
| chr17 | Cufflinks exon3619982  | 3620092  | . | - | . | gene_id "XLOC_022712"; transcript_id "TCONS_00038099"; exon_number "5"; oId "CUFF.37313.1"; tss_id "TSS28695"; |

"CUFF.37313.1"; tss\_id "TSS28695";  
chr17 Cufflinks exon3623601 3623696 . - . gene\_id "XLOC\_022712"; transcript\_id "TCONS\_00038099"; exon\_number "6"; oId  
"CUFF.37313.1"; tss\_id "TSS28695";  
chr17 Cufflinks exon3626982 3627203 . - . gene\_id "XLOC\_022712"; transcript\_id "TCONS\_00038099"; exon\_number "7"; oId  
"CUFF.37313.1"; tss\_id "TSS28695";  
chr17 Cufflinks exon8023854 8025355 . - . gene\_id "XLOC\_022828"; transcript\_id "TCONS\_00038310"; exon\_number "1"; oId  
"CUFF.37656.1"; tss\_id "TSS28847";  
chr17 Cufflinks exon8025661 8025748 . - . gene\_id "XLOC\_022828"; transcript\_id "TCONS\_00038310"; exon\_number "2"; oId  
"CUFF.37656.1"; tss\_id "TSS28847";  
chr17 Cufflinks exon8026155 8026348 . - . gene\_id "XLOC\_022828"; transcript\_id "TCONS\_00038310"; exon\_number "3"; oId  
"CUFF.37656.1"; tss\_id "TSS28847";  
chr17 Cufflinks exon8075690 8077590 . - . gene\_id "XLOC\_022836"; transcript\_id "TCONS\_00038334"; exon\_number "1"; oId  
"CUFF.37666.4"; tss\_id "TSS28859";  
chr17 Cufflinks exon8079518 8079869 . - . gene\_id "XLOC\_022836"; transcript\_id "TCONS\_00038334"; exon\_number "2"; oId  
"CUFF.37666.4"; tss\_id "TSS28859";  
chr17 Cufflinks exon28154701 28154732 . - . gene\_id "XLOC\_023123"; transcript\_id "TCONS\_00038785"; exon\_number  
"1"; oId "CUFF.38489.1"; tss\_id "TSS29213";  
chr17 Cufflinks exon28155133 28155618 . - . gene\_id "XLOC\_023123"; transcript\_id "TCONS\_00038785"; exon\_number  
"2"; oId "CUFF.38489.1"; tss\_id "TSS29213";  
chr17 Cufflinks exon 38974369 38974734 . - . gene\_id "XLOC\_023271"; transcript\_id "TCONS\_00039085";  
exon\_number "1"; oId "CUFF.39100.2"; tss\_id "TSS29421";  
chr17 Cufflinks exon 38974831 38974907 . - . gene\_id "XLOC\_023271"; transcript\_id "TCONS\_00039085";  
exon\_number "2"; oId "CUFF.39100.2"; tss\_id "TSS29421";  
chr17 Cufflinks exon 40852184 40854610 . - . gene\_id "XLOC\_023329"; transcript\_id "TCONS\_00039197";  
exon\_number "1"; oId "CUFF.39232.2"; tss\_id "TSS29505";  
chr17 Cufflinks exon 40854895 40855838 . - . gene\_id "XLOC\_023329"; transcript\_id "TCONS\_00039197";  
exon\_number "2"; oId "CUFF.39232.2"; tss\_id "TSS29505";  
chr17 Cufflinks exon 40856620 40856701 . - . gene\_id "XLOC\_023329"; transcript\_id "TCONS\_00039197";  
exon\_number "3"; oId "CUFF.39232.2"; tss\_id "TSS29505";  
chr17 Cufflinks exon 40856806 40856880 . - . gene\_id "XLOC\_023329"; transcript\_id "TCONS\_00039197";  
exon\_number "4"; oId "CUFF.39232.2"; tss\_id "TSS29505";  
chr17 Cufflinks exon 45532516 45532884 . - . gene\_id "XLOC\_023480"; transcript\_id "TCONS\_00039469";  
exon\_number "1"; oId "CUFF.39758.1"; tss\_id "TSS29715";  
chr17 Cufflinks exon 45720783 45720794 . - . gene\_id "XLOC\_023480"; transcript\_id "TCONS\_00039469";  
exon\_number "2"; oId "CUFF.39758.1"; tss\_id "TSS29715";  
chr17 Cufflinks exon 53497298 53497894 . - . gene\_id "XLOC\_023582"; transcript\_id "TCONS\_00039639";  
exon\_number "1"; oId "CUFF.40068.2"; tss\_id "TSS29845";  
chr17 Cufflinks exon 53499031 53499375 . - . gene\_id "XLOC\_023582"; transcript\_id "TCONS\_00039639";  
exon\_number "2"; oId "CUFF.40068.2"; tss\_id "TSS29845";  
chr17 Cufflinks exon 54361833 54367288 . - . gene\_id "XLOC\_023589"; transcript\_id "TCONS\_00039652";  
exon\_number "1"; oId "CUFF.40096.5"; tss\_id "TSS29852";  
chr17 Cufflinks exon 54367533 54367671 . - . gene\_id "XLOC\_023589"; transcript\_id "TCONS\_00039652";  
exon\_number "2"; oId "CUFF.40096.5"; tss\_id "TSS29852";

|                  |      |                  |          |             |   |   |                                                        |
|------------------|------|------------------|----------|-------------|---|---|--------------------------------------------------------|
| chr17 Cufflinks  | exon | 54361833         | 54366388 | .           | - | . | gene_id "XLOC_023589"; transcript_id "TCONS_00039653"; |
| exon_number "1"; | oId  | "CUFF.40096.6";  | tss_id   | "TSS29852"; |   |   |                                                        |
| chr17 Cufflinks  | exon | 54366829         | 54367288 | .           | - | . | gene_id "XLOC_023589"; transcript_id "TCONS_00039653"; |
| exon_number "2"; | oId  | "CUFF.40096.6";  | tss_id   | "TSS29852"; |   |   |                                                        |
| chr17 Cufflinks  | exon | 54367533         | 54367721 | .           | - | . | gene_id "XLOC_023589"; transcript_id "TCONS_00039653"; |
| exon_number "3"; | oId  | "CUFF.40096.6";  | tss_id   | "TSS29852"; |   |   |                                                        |
| chr17 Cufflinks  | exon | 54361833         | 54367288 | .           | - | . | gene_id "XLOC_023589"; transcript_id "TCONS_00039654"; |
| exon_number "1"; | oId  | "CUFF.40096.4";  | tss_id   | "TSS29854"; |   |   |                                                        |
| chr17 Cufflinks  | exon | 54367855         | 54370170 | .           | - | . | gene_id "XLOC_023589"; transcript_id "TCONS_00039654"; |
| exon_number "2"; | oId  | "CUFF.40096.4";  | tss_id   | "TSS29854"; |   |   |                                                        |
| chr17 Cufflinks  | exon | 62396777         | 62398715 | .           | - | . | gene_id "XLOC_023717"; transcript_id "TCONS_00039892"; |
| exon_number "1"; | oId  | "CUFF.40495.1";  | tss_id   | "TSS30025"; |   |   |                                                        |
| chr17 Cufflinks  | exon | 62400407         | 62401207 | .           | - | . | gene_id "XLOC_023717"; transcript_id "TCONS_00039892"; |
| exon_number "2"; | oId  | "CUFF.40495.1";  | tss_id   | "TSS30025"; |   |   |                                                        |
| chr17 Cufflinks  | exon | 62407062         | 62407402 | .           | - | . | gene_id "XLOC_023717"; transcript_id "TCONS_00039892"; |
| exon_number "3"; | oId  | "CUFF.40495.1";  | tss_id   | "TSS30025"; |   |   |                                                        |
| chr17 Cufflinks  | exon | 62777824         | 62778042 | .           | - | . | gene_id "XLOC_023725"; transcript_id "TCONS_00039926"; |
| exon_number "1"; | oId  | "CUFF.40524.15"; | tss_id   | "TSS30038"; |   |   |                                                        |
| chr17 Cufflinks  | exon | 62778324         | 62778580 | .           | - | . | gene_id "XLOC_023725"; transcript_id "TCONS_00039926"; |
| exon_number "2"; | oId  | "CUFF.40524.15"; | tss_id   | "TSS30038"; |   |   |                                                        |
| chr17 Cufflinks  | exon | 74675651         | 74676961 | .           | - | . | gene_id "XLOC_023884"; transcript_id "TCONS_00040216"; |
| exon_number "1"; | oId  | "CUFF.41023.3";  | tss_id   | "TSS30256"; |   |   |                                                        |
| chr17 Cufflinks  | exon | 74681154         | 74681247 | .           | - | . | gene_id "XLOC_023884"; transcript_id "TCONS_00040216"; |
| exon_number "2"; | oId  | "CUFF.41023.3";  | tss_id   | "TSS30256"; |   |   |                                                        |
| chr17 Cufflinks  | exon | 74684195         | 74684258 | .           | - | . | gene_id "XLOC_023884"; transcript_id "TCONS_00040216"; |
| exon_number "3"; | oId  | "CUFF.41023.3";  | tss_id   | "TSS30256"; |   |   |                                                        |
| chr17 Cufflinks  | exon | 74684752         | 74684969 | .           | - | . | gene_id "XLOC_023884"; transcript_id "TCONS_00040216"; |
| exon_number "4"; | oId  | "CUFF.41023.3";  | tss_id   | "TSS30256"; |   |   |                                                        |
| chr17 Cufflinks  | exon | 74675651         | 74676961 | .           | - | . | gene_id "XLOC_023884"; transcript_id "TCONS_00040217"; |
| exon_number "1"; | oId  | "CUFF.41023.4";  | tss_id   | "TSS30254"; |   |   |                                                        |
| chr17 Cufflinks  | exon | 74681154         | 74681247 | .           | - | . | gene_id "XLOC_023884"; transcript_id "TCONS_00040217"; |
| exon_number "2"; | oId  | "CUFF.41023.4";  | tss_id   | "TSS30254"; |   |   |                                                        |
| chr17 Cufflinks  | exon | 74684195         | 74684258 | .           | - | . | gene_id "XLOC_023884"; transcript_id "TCONS_00040217"; |
| exon_number "3"; | oId  | "CUFF.41023.4";  | tss_id   | "TSS30254"; |   |   |                                                        |
| chr17 Cufflinks  | exon | 74705580         | 74705679 | .           | - | . | gene_id "XLOC_023884"; transcript_id "TCONS_00040217"; |
| exon_number "4"; | oId  | "CUFF.41023.4";  | tss_id   | "TSS30254"; |   |   |                                                        |
| chr17 Cufflinks  | exon | 76114252         | 76114377 | .           | - | . | gene_id "XLOC_023898"; transcript_id "TCONS_00040238"; |
| exon_number "1"; | oId  | "CUFF.41143.1";  | tss_id   | "TSS30272"; |   |   |                                                        |
| chr17 Cufflinks  | exon | 76116545         | 76116731 | .           | - | . | gene_id "XLOC_023898"; transcript_id "TCONS_00040238"; |
| exon_number "2"; | oId  | "CUFF.41143.1";  | tss_id   | "TSS30272"; |   |   |                                                        |
| chr17 Cufflinks  | exon | 80059346         | 80059742 | .           | - | . | gene_id "XLOC_024003"; transcript_id "TCONS_00040419"; |
| exon_number "1"; | oId  | "CUFF.41433.2";  | tss_id   | "TSS30402"; |   |   |                                                        |
| chr17 Cufflinks  | exon | 80064146         | 80064426 | .           | - | . | gene_id "XLOC_024003"; transcript_id "TCONS_00040419"; |

exon\_number "2"; oId "CUFF.41433.2"; tss\_id "TSS30402";  
 chr18 Cufflinks exon 3594081 3594238 . + . gene\_id "XLOC\_024079"; transcript\_id "TCONS\_00040531"; exon\_number "1"; oId  
 "CUFF.41657.3"; tss\_id "TSS30495";  
 chr18 Cufflinks exon 3594418 3594482 . + . gene\_id "XLOC\_024079"; transcript\_id "TCONS\_00040531"; exon\_number "2"; oId  
 "CUFF.41657.3"; tss\_id "TSS30495";  
 chr18 Cufflinks exon 3596577 3596673 . + . gene\_id "XLOC\_024079"; transcript\_id "TCONS\_00040531"; exon\_number "3"; oId  
 "CUFF.41657.3"; tss\_id "TSS30495";  
 chr18 Cufflinks exon 3597174 3598257 . + . gene\_id "XLOC\_024079"; transcript\_id "TCONS\_00040531"; exon\_number "4"; oId  
 "CUFF.41657.3"; tss\_id "TSS30495";  
 chr18 Cufflinks exon 3594081 3594238 . + . gene\_id "XLOC\_024079"; transcript\_id "TCONS\_00040529"; exon\_number "1"; oId  
 "CUFF.41657.1"; tss\_id "TSS30495";  
 chr18 Cufflinks exon 3594418 3594482 . + . gene\_id "XLOC\_024079"; transcript\_id "TCONS\_00040529"; exon\_number "2"; oId  
 "CUFF.41657.1"; tss\_id "TSS30495";  
 chr18 Cufflinks exon 3597174 3598257 . + . gene\_id "XLOC\_024079"; transcript\_id "TCONS\_00040529"; exon\_number "3"; oId  
 "CUFF.41657.1"; tss\_id "TSS30495";  
 chr18 Cufflinks exon 3594112 3594238 . + . gene\_id "XLOC\_024079"; transcript\_id "TCONS\_00040535"; exon\_number "1"; oId  
 "CUFF.41657.7"; tss\_id "TSS30495";  
 chr18 Cufflinks exon 3596577 3596673 . + . gene\_id "XLOC\_024079"; transcript\_id "TCONS\_00040535"; exon\_number "2"; oId  
 "CUFF.41657.7"; tss\_id "TSS30495";  
 chr18 Cufflinks exon 3597214 3598257 . + . gene\_id "XLOC\_024079"; transcript\_id "TCONS\_00040535"; exon\_number "3"; oId  
 "CUFF.41657.7"; tss\_id "TSS30495";  
 chr18 Cufflinks exon 34823695 34823961 . + . gene\_id "XLOC\_024321"; transcript\_id "TCONS\_00040918";  
 exon\_number "1"; oId "CUFF.42460.1"; tss\_id "TSS30793";  
 chr18 Cufflinks exon 34826853 34827326 . + . gene\_id "XLOC\_024321"; transcript\_id "TCONS\_00040918";  
 exon\_number "2"; oId "CUFF.42460.1"; tss\_id "TSS30793";  
 chr18 Cufflinks exon 43914187 43914298 . + . gene\_id "XLOC\_024355"; transcript\_id "TCONS\_00040973";  
 exon\_number "1"; oId "CUFF.42768.5"; tss\_id "TSS30837";  
 chr18 Cufflinks exon 43915851 43917614 . + . gene\_id "XLOC\_024355"; transcript\_id "TCONS\_00040973";  
 exon\_number "2"; oId "CUFF.42768.5"; tss\_id "TSS30837";  
 chr18 Cufflinks exon 72354144 72354438 . + . gene\_id "XLOC\_024540"; transcript\_id "TCONS\_00041250";  
 exon\_number "1"; oId "CUFF.43301.1"; tss\_id "TSS31054";  
 chr18 Cufflinks exon 72439595 72439691 . + . gene\_id "XLOC\_024540"; transcript\_id "TCONS\_00041250";  
 exon\_number "2"; oId "CUFF.43301.1"; tss\_id "TSS31054";  
 chr18 Cufflinks exon 72440466 72440487 . + . gene\_id "XLOC\_024540"; transcript\_id "TCONS\_00041250";  
 exon\_number "3"; oId "CUFF.43301.1"; tss\_id "TSS31054";  
 chr18 Cufflinks exon 13270966 13273163 . - . gene\_id "XLOC\_024717"; transcript\_id "TCONS\_00041512";  
 exon\_number "1"; oId "CUFF.41916.4"; tss\_id "TSS31270";  
 chr18 Cufflinks exon 13273734 13274087 . - . gene\_id "XLOC\_024717"; transcript\_id "TCONS\_00041512";  
 exon\_number "2"; oId "CUFF.41916.4"; tss\_id "TSS31270";  
 chr18 Cufflinks exon 13270966 13273155 . - . gene\_id "XLOC\_024717"; transcript\_id "TCONS\_00041516";  
 exon\_number "1"; oId "CUFF.41916.5"; tss\_id "TSS31270";  
 chr18 Cufflinks exon 13273727 13274107 . - . gene\_id "XLOC\_024717"; transcript\_id "TCONS\_00041516";  
 exon\_number "2"; oId "CUFF.41916.5"; tss\_id "TSS31270";



|                  |      |                 |          |             |   |   |                                                        |
|------------------|------|-----------------|----------|-------------|---|---|--------------------------------------------------------|
| chr18 Cufflinks  | exon | 13270966        | 13273153 | .           | - | . | gene_id "XLOC_024717"; transcript_id "TCONS_00041514"; |
| exon_number "1"; | oId  | "CUFF.41916.2"; | tss_id   | "TSS31270"; |   |   |                                                        |
| chr18 Cufflinks  | exon | 13273727        | 13274107 | .           | - | . | gene_id "XLOC_024717"; transcript_id "TCONS_00041514"; |
| exon_number "2"; | oId  | "CUFF.41916.2"; | tss_id   | "TSS31270"; |   |   |                                                        |
| chr18 Cufflinks  | exon | 13270966        | 13272884 | .           | - | . | gene_id "XLOC_024717"; transcript_id "TCONS_00041513"; |
| exon_number "1"; | oId  | "CUFF.41916.1"; | tss_id   | "TSS31270"; |   |   |                                                        |
| chr18 Cufflinks  | exon | 13273727        | 13274107 | .           | - | . | gene_id "XLOC_024717"; transcript_id "TCONS_00041513"; |
| exon_number "2"; | oId  | "CUFF.41916.1"; | tss_id   | "TSS31270"; |   |   |                                                        |
| chr18 Cufflinks  | exon | 72566631        | 72568652 | .           | - | . | gene_id "XLOC_025164"; transcript_id "TCONS_00042174"; |
| exon_number "1"; | oId  | "CUFF.43302.1"; | tss_id   | "TSS31816"; |   |   |                                                        |
| chr18 Cufflinks  | exon | 72577066        | 72577216 | .           | - | . | gene_id "XLOC_025164"; transcript_id "TCONS_00042174"; |
| exon_number "2"; | oId  | "CUFF.43302.1"; | tss_id   | "TSS31816"; |   |   |                                                        |
| chr18 Cufflinks  | exon | 72618042        | 72618283 | .           | - | . | gene_id "XLOC_025164"; transcript_id "TCONS_00042174"; |
| exon_number "3"; | oId  | "CUFF.43302.1"; | tss_id   | "TSS31816"; |   |   |                                                        |
| chr18 Cufflinks  | exon | 72570339        | 72570775 | .           | - | . | gene_id "XLOC_025164"; transcript_id "TCONS_00042175"; |
| exon_number "1"; | oId  | "CUFF.43302.2"; | tss_id   | "TSS31816"; |   |   |                                                        |
| chr18 Cufflinks  | exon | 72577066        | 72577213 | .           | - | . | gene_id "XLOC_025164"; transcript_id "TCONS_00042175"; |
| exon_number "2"; | oId  | "CUFF.43302.2"; | tss_id   | "TSS31816"; |   |   |                                                        |
| chr18 Cufflinks  | exon | 72618042        | 72618283 | .           | - | . | gene_id "XLOC_025164"; transcript_id "TCONS_00042175"; |
| exon_number "3"; | oId  | "CUFF.43302.2"; | tss_id   | "TSS31816"; |   |   |                                                        |
| chr18 Cufflinks  | exon | 72607614        | 72607927 | .           | - | . | gene_id "XLOC_025164"; transcript_id "TCONS_00042176"; |
| exon_number "1"; | oId  | "CUFF.43302.3"; | tss_id   | "TSS31816"; |   |   |                                                        |
| chr18 Cufflinks  | exon | 72618042        | 72618283 | .           | - | . | gene_id "XLOC_025164"; transcript_id "TCONS_00042176"; |
| exon_number "2"; | oId  | "CUFF.43302.3"; | tss_id   | "TSS31816"; |   |   |                                                        |
| chr18 Cufflinks  | exon | 77157220        | 77158219 | .           | - | . | gene_id "XLOC_025203"; transcript_id "TCONS_00042241"; |
| exon_number "1"; | oId  | "CUFF.43428.1"; | tss_id   | "TSS31866"; |   |   |                                                        |
| chr18 Cufflinks  | exon | 77160023        | 77160197 | .           | - | . | gene_id "XLOC_025203"; transcript_id "TCONS_00042241"; |
| exon_number "2"; | oId  | "CUFF.43428.1"; | tss_id   | "TSS31866"; |   |   |                                                        |
| chr19 Cufflinks  | exon | 17413042        | 17413143 | .           | + | . | gene_id "XLOC_025585"; transcript_id "TCONS_00042909"; |
| exon_number "1"; | oId  | "CUFF.45168.1"; | tss_id   | "TSS32340"; |   |   |                                                        |
| chr19 Cufflinks  | exon | 17413168        | 17413356 | .           | + | . | gene_id "XLOC_025585"; transcript_id "TCONS_00042909"; |
| exon_number "2"; | oId  | "CUFF.45168.1"; | tss_id   | "TSS32340"; |   |   |                                                        |
| chr19 Cufflinks  | exon | 42055661        | 42055920 | .           | + | . | gene_id "XLOC_025995"; transcript_id "TCONS_00043625"; |
| exon_number "1"; | oId  | "CUFF.46841.1"; | tss_id   | "TSS32847"; |   |   |                                                        |
| chr19 Cufflinks  | exon | 42056506        | 42057490 | .           | + | . | gene_id "XLOC_025995"; transcript_id "TCONS_00043625"; |
| exon_number "2"; | oId  | "CUFF.46841.1"; | tss_id   | "TSS32847"; |   |   |                                                        |
| chr19 Cufflinks  | exon | 55338472        | 55338586 | .           | + | . | gene_id "XLOC_026344"; transcript_id "TCONS_00044286"; |
| exon_number "1"; | oId  | "CUFF.48020.1"; | tss_id   | "TSS33297"; |   |   |                                                        |
| chr19 Cufflinks  | exon | 55356428        | 55356713 | .           | + | . | gene_id "XLOC_026344"; transcript_id "TCONS_00044286"; |
| exon_number "2"; | oId  | "CUFF.48020.1"; | tss_id   | "TSS33297"; |   |   |                                                        |
| chr19 Cufflinks  | exon | 56813412        | 56813464 | .           | + | . | gene_id "XLOC_026387"; transcript_id "TCONS_00044359"; |
| exon_number "1"; | oId  | "CUFF.48177.1"; | tss_id   | "TSS33353"; |   |   |                                                        |
| chr19 Cufflinks  | exon | 56816143        | 56816199 | .           | + | . | gene_id "XLOC_026387"; transcript_id "TCONS_00044359"; |

exon\_number "2"; oId "CUFF.48177.1"; tss\_id "TSS33353";  
chr19 Cufflinks exon 56821493 56821823 . + . gene\_id "XLOC\_026387"; transcript\_id "TCONS\_00044359";  
exon\_number "3"; oId "CUFF.48177.1"; tss\_id "TSS33353";  
chr19 Cufflinks exon 56813413 56813464 . + . gene\_id "XLOC\_026387"; transcript\_id "TCONS\_00044360";  
exon\_number "1"; oId "CUFF.48177.2"; tss\_id "TSS33353";  
chr19 Cufflinks exon 56816143 56816204 . + . gene\_id "XLOC\_026387"; transcript\_id "TCONS\_00044360";  
exon\_number "2"; oId "CUFF.48177.2"; tss\_id "TSS33353";  
chr19 Cufflinks exon 56821493 56821823 . + . gene\_id "XLOC\_026387"; transcript\_id "TCONS\_00044360";  
exon\_number "3"; oId "CUFF.48177.2"; tss\_id "TSS33353";  
chr19 Cufflinks exon57999768 58000078 . + . gene\_id "XLOC\_026423"; transcript\_id "TCONS\_00044421"; exon\_number  
"1"; oId "CUFF.48297.1"; tss\_id "TSS33391";  
chr19 Cufflinks exon58000104 58000674 . + . gene\_id "XLOC\_026423"; transcript\_id "TCONS\_00044421"; exon\_number  
"2"; oId "CUFF.48297.1"; tss\_id "TSS33391";  
chr19 Cufflinks exon58963924 58964149 . + . gene\_id "XLOC\_026487"; transcript\_id "TCONS\_00044542"; exon\_number  
"1"; oId "CUFF.48509.4"; tss\_id "TSS33475";  
chr19 Cufflinks exon58964554 58964633 . + . gene\_id "XLOC\_026487"; transcript\_id "TCONS\_00044542"; exon\_number  
"2"; oId "CUFF.48509.4"; tss\_id "TSS33475";  
chr19 Cufflinks exon4061611 4062243 . - . gene\_id "XLOC\_026627"; transcript\_id "TCONS\_00044751"; exon\_number "1"; oId  
"CUFF.43875.6"; tss\_id "TSS33655";  
chr19 Cufflinks exon4062692 4062943 . - . gene\_id "XLOC\_026627"; transcript\_id "TCONS\_00044751"; exon\_number "2"; oId  
"CUFF.43875.6"; tss\_id "TSS33655";  
chr19 Cufflinks exon13993861 13993904 . - . gene\_id "XLOC\_026853"; transcript\_id "TCONS\_00045174"; exon\_number  
"1"; oId "CUFF.44888.1"; tss\_id "TSS33951";  
chr19 Cufflinks exon13993926 13994116 . - . gene\_id "XLOC\_026853"; transcript\_id "TCONS\_00045174"; exon\_number  
"2"; oId "CUFF.44888.1"; tss\_id "TSS33951";  
chr19 Cufflinks exon15795867 15795993 . - . gene\_id "XLOC\_026911"; transcript\_id "TCONS\_00045283"; exon\_number  
"1"; oId "CUFF.45049.2"; tss\_id "TSS34034";  
chr19 Cufflinks exon15807236 15807793 . - . gene\_id "XLOC\_026911"; transcript\_id "TCONS\_00045283"; exon\_number  
"2"; oId "CUFF.45049.2"; tss\_id "TSS34034";  
chr19 Cufflinks exon15795867 15795991 . - . gene\_id "XLOC\_026911"; transcript\_id "TCONS\_00045282"; exon\_number  
"1"; oId "CUFF.45049.1"; tss\_id "TSS34034";  
chr19 Cufflinks exon15807234 15807793 . - . gene\_id "XLOC\_026911"; transcript\_id "TCONS\_00045282"; exon\_number  
"2"; oId "CUFF.45049.1"; tss\_id "TSS34034";  
chr19 Cufflinks exon15957076 15957173 . - . gene\_id "XLOC\_026915"; transcript\_id "TCONS\_00045290"; exon\_number  
"1"; oId "CUFF.45056.1"; tss\_id "TSS34039";  
chr19 Cufflinks exon15965543 15965646 . - . gene\_id "XLOC\_026915"; transcript\_id "TCONS\_00045290"; exon\_number  
"2"; oId "CUFF.45056.1"; tss\_id "TSS34039";  
chr19 Cufflinks exon15975626 15975719 . - . gene\_id "XLOC\_026915"; transcript\_id "TCONS\_00045290"; exon\_number  
"3"; oId "CUFF.45056.1"; tss\_id "TSS34039";  
chr19 Cufflinks exon17447483 17448029 . - . gene\_id "XLOC\_026940"; transcript\_id "TCONS\_00045340"; exon\_number  
"1"; oId "CUFF.45173.1"; tss\_id "TSS34071";  
chr19 Cufflinks exon17448210 17448285 . - . gene\_id "XLOC\_026940"; transcript\_id "TCONS\_00045340"; exon\_number  
"2"; oId "CUFF.45173.1"; tss\_id "TSS34071";

|       |                        |          |   |   |   |                                                                                                                |
|-------|------------------------|----------|---|---|---|----------------------------------------------------------------------------------------------------------------|
| chr19 | Cufflinks exon18417040 | 18418365 | . | - | . | gene_id "XLOC_026964"; transcript_id "TCONS_00045377"; exon_number "1"; oId "CUFF.45279.6"; tss_id "TSS34101"; |
| chr19 | Cufflinks exon18418456 | 18418473 | . | - | . | gene_id "XLOC_026964"; transcript_id "TCONS_00045377"; exon_number "2"; oId "CUFF.45279.6"; tss_id "TSS34101"; |
| chr19 | Cufflinks exon20141588 | 20141691 | . | - | . | gene_id "XLOC_027010"; transcript_id "TCONS_00045466"; exon_number "1"; oId "CUFF.45456.1"; tss_id "TSS34163"; |
| chr19 | Cufflinks exon20141802 | 20141922 | . | - | . | gene_id "XLOC_027010"; transcript_id "TCONS_00045466"; exon_number "2"; oId "CUFF.45456.1"; tss_id "TSS34163"; |
| chr19 | Cufflinks exon20143651 | 20143716 | . | - | . | gene_id "XLOC_027010"; transcript_id "TCONS_00045466"; exon_number "3"; oId "CUFF.45456.1"; tss_id "TSS34163"; |
| chr19 | Cufflinks exon36233428 | 36233704 | . | - | . | gene_id "XLOC_027166"; transcript_id "TCONS_00045710"; exon_number "1"; oId "CUFF.46302.4"; tss_id "TSS34346"; |
| chr19 | Cufflinks exon36234710 | 36234805 | . | - | . | gene_id "XLOC_027166"; transcript_id "TCONS_00045710"; exon_number "2"; oId "CUFF.46302.4"; tss_id "TSS34346"; |
| chr19 | Cufflinks exon36234971 | 36235322 | . | - | . | gene_id "XLOC_027166"; transcript_id "TCONS_00045710"; exon_number "3"; oId "CUFF.46302.4"; tss_id "TSS34346"; |
| chr19 | Cufflinks exon36235527 | 36235639 | . | - | . | gene_id "XLOC_027166"; transcript_id "TCONS_00045710"; exon_number "4"; oId "CUFF.46302.4"; tss_id "TSS34346"; |
| chr19 | Cufflinks exon36236026 | 36236088 | . | - | . | gene_id "XLOC_027166"; transcript_id "TCONS_00045710"; exon_number "5"; oId "CUFF.46302.4"; tss_id "TSS34346"; |
| chr19 | Cufflinks exon36236249 | 36236343 | . | - | . | gene_id "XLOC_027166"; transcript_id "TCONS_00045710"; exon_number "6"; oId "CUFF.46302.4"; tss_id "TSS34346"; |
| chr19 | Cufflinks exon36395303 | 36395536 | . | - | . | gene_id "XLOC_027173"; transcript_id "TCONS_00045728"; exon_number "1"; oId "CUFF.46330.3"; tss_id "TSS34359"; |
| chr19 | Cufflinks exon36398120 | 36398163 | . | - | . | gene_id "XLOC_027173"; transcript_id "TCONS_00045728"; exon_number "2"; oId "CUFF.46330.3"; tss_id "TSS34359"; |
| chr19 | Cufflinks exon36398348 | 36398482 | . | - | . | gene_id "XLOC_027173"; transcript_id "TCONS_00045728"; exon_number "3"; oId "CUFF.46330.3"; tss_id "TSS34359"; |
| chr19 | Cufflinks exon36398632 | 36398664 | . | - | . | gene_id "XLOC_027173"; transcript_id "TCONS_00045728"; exon_number "4"; oId "CUFF.46330.3"; tss_id "TSS34359"; |
| chr19 | Cufflinks exon36399077 | 36399217 | . | - | . | gene_id "XLOC_027173"; transcript_id "TCONS_00045728"; exon_number "5"; oId "CUFF.46330.3"; tss_id "TSS34359"; |
| chr19 | Cufflinks exon49173080 | 49173102 | . | - | . | gene_id "XLOC_027422"; transcript_id "TCONS_00046248"; exon_number "1"; oId "CUFF.47378.1"; tss_id "TSS34726"; |
| chr19 | Cufflinks exon49173248 | 49173610 | . | - | . | gene_id "XLOC_027422"; transcript_id "TCONS_00046248"; exon_number "2"; oId "CUFF.47378.1"; tss_id "TSS34726"; |
| chr19 | Cufflinks exon56818885 | 56819492 | . | - | . | gene_id "XLOC_027633"; transcript_id "TCONS_00046664"; exon_number "1"; oId "CUFF.48179.1"; tss_id "TSS35011"; |
| chr19 | Cufflinks exon56819775 | 56819823 | . | - | . | gene_id "XLOC_027633"; transcript_id "TCONS_00046664"; exon_number "2"; oId "CUFF.48179.1"; tss_id "TSS35011"; |
| chr19 | Cufflinks exon58509763 | 58511264 | . | - | . | gene_id "XLOC_027666"; transcript_id "TCONS_00046718"; exon_number "1"; oId "CUFF.48432.5"; tss_id "TSS35048"; |
| chr19 | Cufflinks exon58512051 | 58512107 | . | - | . | gene_id "XLOC_027666"; transcript_id "TCONS_00046718"; exon_number "2"; oId "CUFF.48432.5"; tss_id "TSS35048"; |

"2"; oId "CUFF.48432.5"; tss\_id "TSS35048";  
chr19 Cufflinks exon58512657 58512738 . - . gene\_id "XLOC\_027666"; transcript\_id "TCONS\_00046718"; exon\_number  
"3"; oId "CUFF.48432.5"; tss\_id "TSS35048";  
chr19 Cufflinks exon58513683 58513724 . - . gene\_id "XLOC\_027666"; transcript\_id "TCONS\_00046718"; exon\_number  
"4"; oId "CUFF.48432.5"; tss\_id "TSS35048";  
chr19 Cufflinks exon58509763 58511264 . - . gene\_id "XLOC\_027666"; transcript\_id "TCONS\_00046719"; exon\_number  
"1"; oId "CUFF.48432.4"; tss\_id "TSS35050";  
chr19 Cufflinks exon58512051 58512107 . - . gene\_id "XLOC\_027666"; transcript\_id "TCONS\_00046719"; exon\_number  
"2"; oId "CUFF.48432.4"; tss\_id "TSS35050";  
chr19 Cufflinks exon58512657 58512738 . - . gene\_id "XLOC\_027666"; transcript\_id "TCONS\_00046719"; exon\_number  
"3"; oId "CUFF.48432.4"; tss\_id "TSS35050";  
chr19 Cufflinks exon58513764 58514147 . - . gene\_id "XLOC\_027666"; transcript\_id "TCONS\_00046719"; exon\_number  
"4"; oId "CUFF.48432.4"; tss\_id "TSS35050";  
chr2 Cufflinks exon1370568 1370871 . + . gene\_id "XLOC\_027721"; transcript\_id "TCONS\_00046821"; exon\_number "1"; oId  
"CUFF.48648.6"; tss\_id "TSS35123";  
chr2 Cufflinks exon1371115 1371384 . + . gene\_id "XLOC\_027721"; transcript\_id "TCONS\_00046821"; exon\_number "2"; oId  
"CUFF.48648.6"; tss\_id "TSS35123";  
chr2 Cufflinks exon1104701 1108199 . + . gene\_id "XLOC\_027725"; transcript\_id "TCONS\_00046811"; exon\_number "1"; oId  
"CUFF.48654.1"; tss\_id "TSS35127";  
chr2 Cufflinks exon1108247 1108749 . + . gene\_id "XLOC\_027725"; transcript\_id "TCONS\_00046811"; exon\_number "2"; oId  
"CUFF.48654.1"; tss\_id "TSS35127";  
chr2 Cufflinks exon39664557 39664676 . + . gene\_id "XLOC\_028066"; transcript\_id "TCONS\_00047348"; exon\_number "1";  
oId "CUFF.49806.3"; tss\_id "TSS35540";  
chr2 Cufflinks exon39680980 39681072 . + . gene\_id "XLOC\_028066"; transcript\_id "TCONS\_00047348"; exon\_number "2";  
oId "CUFF.49806.3"; tss\_id "TSS35540";  
chr2 Cufflinks exon39681438 39681506 . + . gene\_id "XLOC\_028066"; transcript\_id "TCONS\_00047348"; exon\_number "3";  
oId "CUFF.49806.3"; tss\_id "TSS35540";  
chr2 Cufflinks exon39743555 39743682 . + . gene\_id "XLOC\_028066"; transcript\_id "TCONS\_00047348"; exon\_number "4";  
oId "CUFF.49806.3"; tss\_id "TSS35540";  
chr2 Cufflinks exon39745724 39745851 . + . gene\_id "XLOC\_028066"; transcript\_id "TCONS\_00047348"; exon\_number "5";  
oId "CUFF.49806.3"; tss\_id "TSS35540";  
chr2 Cufflinks exon39873402 39873507 . + . gene\_id "XLOC\_028066"; transcript\_id "TCONS\_00047348"; exon\_number "6";  
oId "CUFF.49806.3"; tss\_id "TSS35540";  
chr2 Cufflinks exon44401901 44402047 . + . gene\_id "XLOC\_028112"; transcript\_id "TCONS\_00047420"; exon\_number "1";  
oId "CUFF.49989.1"; tss\_id "TSS35596";  
chr2 Cufflinks exon44407384 44407543 . + . gene\_id "XLOC\_028112"; transcript\_id "TCONS\_00047420"; exon\_number "2";  
oId "CUFF.49989.1"; tss\_id "TSS35596";  
chr2 Cufflinks exon68907095 68907227 . + . gene\_id "XLOC\_028386"; transcript\_id "TCONS\_00047793"; exon\_number "1";  
oId "CUFF.51139.3"; tss\_id "TSS35914";  
chr2 Cufflinks exon68919876 68920958 . + . gene\_id "XLOC\_028386"; transcript\_id "TCONS\_00047793"; exon\_number "2";  
oId "CUFF.51139.3"; tss\_id "TSS35914";  
chr2 Cufflinks exon73511654 73511710 . + . gene\_id "XLOC\_028438"; transcript\_id "TCONS\_00047876"; exon\_number "1";  
oId "CUFF.51337.1"; tss\_id "TSS35975";

|                                        |          |   |   |   |                                                                         |
|----------------------------------------|----------|---|---|---|-------------------------------------------------------------------------|
| chr2 Cufflinks exon73513036            | 73513365 | . | + | . | gene_id "XLOC_028438"; transcript_id "TCONS_00047876"; exon_number "2"; |
| oId "CUFF.51337.1"; tss_id "TSS35975"; |          |   |   |   |                                                                         |
| chr2 Cufflinks exon75899495            | 75900070 | . | + | . | gene_id "XLOC_028495"; transcript_id "TCONS_00047986"; exon_number "1"; |
| oId "CUFF.51637.1"; tss_id "TSS36045"; |          |   |   |   |                                                                         |
| chr2 Cufflinks exon75904415            | 75904473 | . | + | . | gene_id "XLOC_028495"; transcript_id "TCONS_00047986"; exon_number "2"; |
| oId "CUFF.51637.1"; tss_id "TSS36045"; |          |   |   |   |                                                                         |
| chr2 Cufflinks exon80220426            | 80220661 | . | + | . | gene_id "XLOC_028499"; transcript_id "TCONS_00047992"; exon_number "1"; |
| oId "CUFF.51652.3"; tss_id "TSS36049"; |          |   |   |   |                                                                         |
| chr2 Cufflinks exon80221958            | 80223297 | . | + | . | gene_id "XLOC_028499"; transcript_id "TCONS_00047992"; exon_number "2"; |
| oId "CUFF.51652.3"; tss_id "TSS36049"; |          |   |   |   |                                                                         |
| chr2 Cufflinks exon80220426            | 80220661 | . | + | . | gene_id "XLOC_028499"; transcript_id "TCONS_00047991"; exon_number "1"; |
| oId "CUFF.51652.2"; tss_id "TSS36049"; |          |   |   |   |                                                                         |
| chr2 Cufflinks exon80221958            | 80222084 | . | + | . | gene_id "XLOC_028499"; transcript_id "TCONS_00047991"; exon_number "2"; |
| oId "CUFF.51652.2"; tss_id "TSS36049"; |          |   |   |   |                                                                         |
| chr2 Cufflinks exon80222496            | 80222628 | . | + | . | gene_id "XLOC_028499"; transcript_id "TCONS_00047991"; exon_number "3"; |
| oId "CUFF.51652.2"; tss_id "TSS36049"; |          |   |   |   |                                                                         |
| chr2 Cufflinks exon80223134            | 80223297 | . | + | . | gene_id "XLOC_028499"; transcript_id "TCONS_00047991"; exon_number "4"; |
| oId "CUFF.51652.2"; tss_id "TSS36049"; |          |   |   |   |                                                                         |
| chr2 Cufflinks exon80220426            | 80220661 | . | + | . | gene_id "XLOC_028499"; transcript_id "TCONS_00047990"; exon_number "1"; |
| oId "CUFF.51652.1"; tss_id "TSS36049"; |          |   |   |   |                                                                         |
| chr2 Cufflinks exon80221958            | 80222084 | . | + | . | gene_id "XLOC_028499"; transcript_id "TCONS_00047990"; exon_number "2"; |
| oId "CUFF.51652.1"; tss_id "TSS36049"; |          |   |   |   |                                                                         |
| chr2 Cufflinks exon80223134            | 80223297 | . | + | . | gene_id "XLOC_028499"; transcript_id "TCONS_00047990"; exon_number "3"; |
| oId "CUFF.51652.1"; tss_id "TSS36049"; |          |   |   |   |                                                                         |
| chr2 Cufflinks exon80220490            | 80220662 | . | + | . | gene_id "XLOC_028499"; transcript_id "TCONS_00047993"; exon_number "1"; |
| oId "CUFF.51652.4"; tss_id "TSS36049"; |          |   |   |   |                                                                         |
| chr2 Cufflinks exon80221958            | 80223297 | . | + | . | gene_id "XLOC_028499"; transcript_id "TCONS_00047993"; exon_number "2"; |
| oId "CUFF.51652.4"; tss_id "TSS36049"; |          |   |   |   |                                                                         |
| chr2 Cufflinks exon87035420            | 87036753 | . | + | . | gene_id "XLOC_028544"; transcript_id "TCONS_00048076"; exon_number "1"; |
| oId "CUFF.51841.3"; tss_id "TSS36112"; |          |   |   |   |                                                                         |
| chr2 Cufflinks exon87037016            | 87037459 | . | + | . | gene_id "XLOC_028544"; transcript_id "TCONS_00048076"; exon_number "2"; |
| oId "CUFF.51841.3"; tss_id "TSS36112"; |          |   |   |   |                                                                         |
| chr2 Cufflinks exon87035420            | 87036752 | . | + | . | gene_id "XLOC_028544"; transcript_id "TCONS_00048075"; exon_number "1"; |
| oId "CUFF.51841.2"; tss_id "TSS36112"; |          |   |   |   |                                                                         |
| chr2 Cufflinks exon87037015            | 87037459 | . | + | . | gene_id "XLOC_028544"; transcript_id "TCONS_00048075"; exon_number "2"; |
| oId "CUFF.51841.2"; tss_id "TSS36112"; |          |   |   |   |                                                                         |
| chr2 Cufflinks exon87754942            | 87754971 | . | + | . | gene_id "XLOC_028566"; transcript_id "TCONS_00048109"; exon_number "1"; |
| oId "CUFF.51920.1"; tss_id "TSS36141"; |          |   |   |   |                                                                         |
| chr2 Cufflinks exon87755083            | 87755164 | . | + | . | gene_id "XLOC_028566"; transcript_id "TCONS_00048109"; exon_number "2"; |
| oId "CUFF.51920.1"; tss_id "TSS36141"; |          |   |   |   |                                                                         |
| chr2 Cufflinks exon87820726            | 87821037 | . | + | . | gene_id "XLOC_028566"; transcript_id "TCONS_00048109"; exon_number "3"; |
| oId "CUFF.51920.1"; tss_id "TSS36141"; |          |   |   |   |                                                                         |
| chr2 Cufflinks exon87882792            | 87884791 | . | + | . | gene_id "XLOC_028567"; transcript_id "TCONS_00048112"; exon_number "1"; |

|                                        |   |   |   |                                                                         |  |
|----------------------------------------|---|---|---|-------------------------------------------------------------------------|--|
| oId "CUFF.51921.2"; tss_id "TSS36142"; |   |   |   |                                                                         |  |
| chr2 Cufflinks exon87906112 87906288   | . | + | . | gene_id "XLOC_028567"; transcript_id "TCONS_00048112"; exon_number "2"; |  |
| oId "CUFF.51921.2"; tss_id "TSS36142"; |   |   |   |                                                                         |  |
| chr2 Cufflinks exon88000503 88000574   | . | + | . | gene_id "XLOC_028567"; transcript_id "TCONS_00048112"; exon_number "3"; |  |
| oId "CUFF.51921.2"; tss_id "TSS36142"; |   |   |   |                                                                         |  |
| chr2 Cufflinks exon88003854 88004119   | . | + | . | gene_id "XLOC_028567"; transcript_id "TCONS_00048112"; exon_number "4"; |  |
| oId "CUFF.51921.2"; tss_id "TSS36142"; |   |   |   |                                                                         |  |
| chr2 Cufflinks exon88016186 88016309   | . | + | . | gene_id "XLOC_028567"; transcript_id "TCONS_00048112"; exon_number "5"; |  |
| oId "CUFF.51921.2"; tss_id "TSS36142"; |   |   |   |                                                                         |  |
| chr2 Cufflinks exon88019351 88019527   | . | + | . | gene_id "XLOC_028567"; transcript_id "TCONS_00048112"; exon_number "6"; |  |
| oId "CUFF.51921.2"; tss_id "TSS36142"; |   |   |   |                                                                         |  |
| chr2 Cufflinks exon97873985 97874207   | . | + | . | gene_id "XLOC_028640"; transcript_id "TCONS_00048241"; exon_number "1"; |  |
| oId "CUFF.52191.1"; tss_id "TSS36236"; |   |   |   |                                                                         |  |
| chr2 Cufflinks exon97876019 97876242   | . | + | . | gene_id "XLOC_028640"; transcript_id "TCONS_00048241"; exon_number "2"; |  |
| oId "CUFF.52191.1"; tss_id "TSS36236"; |   |   |   |                                                                         |  |
| chr2 Cufflinks exon98307236 98307248   | . | + | . | gene_id "XLOC_028652"; transcript_id "TCONS_00048258"; exon_number "1"; |  |
| oId "CUFF.52244.1"; tss_id "TSS36251"; |   |   |   |                                                                         |  |
| chr2 Cufflinks exon98444190 98444784   | . | + | . | gene_id "XLOC_028652"; transcript_id "TCONS_00048258"; exon_number "2"; |  |
| oId "CUFF.52244.1"; tss_id "TSS36251"; |   |   |   |                                                                         |  |
| chr2 Cufflinks exon99185838 99185875   | . | + | . | gene_id "XLOC_028663"; transcript_id "TCONS_00048274"; exon_number "1"; |  |
| oId "CUFF.52259.1"; tss_id "TSS36266"; |   |   |   |                                                                         |  |
| chr2 Cufflinks exon99186046 99186344   | . | + | . | gene_id "XLOC_028663"; transcript_id "TCONS_00048274"; exon_number "2"; |  |
| oId "CUFF.52259.1"; tss_id "TSS36266"; |   |   |   |                                                                         |  |
| chr2 Cufflinks exon99229739 99230646   | . | + | . | gene_id "XLOC_028675"; transcript_id "TCONS_00048289"; exon_number "1"; |  |
| oId "CUFF.52275.1"; tss_id "TSS36278"; |   |   |   |                                                                         |  |
| chr2 Cufflinks exon99530621 99530633   | . | + | . | gene_id "XLOC_028675"; transcript_id "TCONS_00048289"; exon_number "2"; |  |
| oId "CUFF.52275.1"; tss_id "TSS36278"; |   |   |   |                                                                         |  |
| chr2 Cufflinks exon103048642 103048726 | . | + | . | gene_id "XLOC_028719"; transcript_id "TCONS_00048371"; exon_number "1"; |  |
| oId "CUFF.52467.1"; tss_id "TSS36338"; |   |   |   |                                                                         |  |
| chr2 Cufflinks exon103048819 103049054 | . | + | . | gene_id "XLOC_028719"; transcript_id "TCONS_00048371"; exon_number "2"; |  |
| oId "CUFF.52467.1"; tss_id "TSS36338"; |   |   |   |                                                                         |  |
| chr2 Cufflinks exon110040083 110040286 | . | + | . | gene_id "XLOC_028781"; transcript_id "TCONS_00048475"; exon_number "1"; |  |
| oId "CUFF.52633.1"; tss_id "TSS36420"; |   |   |   |                                                                         |  |
| chr2 Cufflinks exon110047287 110047306 | . | + | . | gene_id "XLOC_028781"; transcript_id "TCONS_00048475"; exon_number "2"; |  |
| oId "CUFF.52633.1"; tss_id "TSS36420"; |   |   |   |                                                                         |  |
| chr2 Cufflinks exon113240877 113240888 | . | + | . | gene_id "XLOC_028807"; transcript_id "TCONS_00048530"; exon_number "1"; |  |
| oId "CUFF.52811.1"; tss_id "TSS36456"; |   |   |   |                                                                         |  |
| chr2 Cufflinks exon113240979 113241299 | . | + | . | gene_id "XLOC_028807"; transcript_id "TCONS_00048530"; exon_number "2"; |  |
| oId "CUFF.52811.1"; tss_id "TSS36456"; |   |   |   |                                                                         |  |
| chr2 Cufflinks exon114009054 114009107 | . | + | . | gene_id "XLOC_028829"; transcript_id "TCONS_00048571"; exon_number "1"; |  |
| oId "CUFF.52873.6"; tss_id "TSS36487"; |   |   |   |                                                                         |  |
| chr2 Cufflinks exon114012967 114013126 | . | + | . | gene_id "XLOC_028829"; transcript_id "TCONS_00048571"; exon_number "2"; |  |
| oId "CUFF.52873.6"; tss_id "TSS36487"; |   |   |   |                                                                         |  |

|                                        |           |   |   |   |                                                                         |
|----------------------------------------|-----------|---|---|---|-------------------------------------------------------------------------|
| chr2 Cufflinks exon114020855           | 114021031 | . | + | . | gene_id "XLOC_028829"; transcript_id "TCONS_00048571"; exon_number "3"; |
| oId "CUFF.52873.6"; tss_id "TSS36487"; |           |   |   |   |                                                                         |
| chr2 Cufflinks exon114023053           | 114024750 | . | + | . | gene_id "XLOC_028829"; transcript_id "TCONS_00048571"; exon_number "4"; |
| oId "CUFF.52873.6"; tss_id "TSS36487"; |           |   |   |   |                                                                         |
| chr2 Cufflinks exon134882494           | 134883323 | . | + | . | gene_id "XLOC_029127"; transcript_id "TCONS_00048965"; exon_number "1"; |
| oId "CUFF.53686.1"; tss_id "TSS36819"; |           |   |   |   |                                                                         |
| chr2 Cufflinks exon134883534           | 134884413 | . | + | . | gene_id "XLOC_029127"; transcript_id "TCONS_00048965"; exon_number "2"; |
| oId "CUFF.53686.1"; tss_id "TSS36819"; |           |   |   |   |                                                                         |
| chr2 Cufflinks exon178554666           | 178554728 | . | + | . | gene_id "XLOC_029429"; transcript_id "TCONS_00049401"; exon_number "1"; |
| oId "CUFF.54680.2"; tss_id "TSS37169"; |           |   |   |   |                                                                         |
| chr2 Cufflinks exon178563157           | 178563299 | . | + | . | gene_id "XLOC_029429"; transcript_id "TCONS_00049401"; exon_number "2"; |
| oId "CUFF.54680.2"; tss_id "TSS37169"; |           |   |   |   |                                                                         |
| chr2 Cufflinks exon178567216           | 178567477 | . | + | . | gene_id "XLOC_029429"; transcript_id "TCONS_00049401"; exon_number "3"; |
| oId "CUFF.54680.2"; tss_id "TSS37169"; |           |   |   |   |                                                                         |
| chr2 Cufflinks exon178587817           | 178587931 | . | + | . | gene_id "XLOC_029429"; transcript_id "TCONS_00049401"; exon_number "4"; |
| oId "CUFF.54680.2"; tss_id "TSS37169"; |           |   |   |   |                                                                         |
| chr2 Cufflinks exon178589448           | 178589824 | . | + | . | gene_id "XLOC_029429"; transcript_id "TCONS_00049401"; exon_number "5"; |
| oId "CUFF.54680.2"; tss_id "TSS37169"; |           |   |   |   |                                                                         |
| chr2 Cufflinks exon182818968           | 182819361 | . | + | . | gene_id "XLOC_029469"; transcript_id "TCONS_00049469"; exon_number "1"; |
| oId "CUFF.54762.4"; tss_id "TSS37216"; |           |   |   |   |                                                                         |
| chr2 Cufflinks exon182839946           | 182839991 | . | + | . | gene_id "XLOC_029469"; transcript_id "TCONS_00049469"; exon_number "2"; |
| oId "CUFF.54762.4"; tss_id "TSS37216"; |           |   |   |   |                                                                         |
| chr2 Cufflinks exon182926169           | 182926206 | . | + | . | gene_id "XLOC_029469"; transcript_id "TCONS_00049469"; exon_number "3"; |
| oId "CUFF.54762.4"; tss_id "TSS37216"; |           |   |   |   |                                                                         |
| chr2 Cufflinks exon182928458           | 182928518 | . | + | . | gene_id "XLOC_029469"; transcript_id "TCONS_00049469"; exon_number "4"; |
| oId "CUFF.54762.4"; tss_id "TSS37216"; |           |   |   |   |                                                                         |
| chr2 Cufflinks exon182981934           | 182982483 | . | + | . | gene_id "XLOC_029469"; transcript_id "TCONS_00049469"; exon_number "5"; |
| oId "CUFF.54762.4"; tss_id "TSS37216"; |           |   |   |   |                                                                         |
| chr2 Cufflinks exon182818968           | 182819361 | . | + | . | gene_id "XLOC_029469"; transcript_id "TCONS_00049470"; exon_number "1"; |
| oId "CUFF.54762.1"; tss_id "TSS37216"; |           |   |   |   |                                                                         |
| chr2 Cufflinks exon182839946           | 182839991 | . | + | . | gene_id "XLOC_029469"; transcript_id "TCONS_00049470"; exon_number "2"; |
| oId "CUFF.54762.1"; tss_id "TSS37216"; |           |   |   |   |                                                                         |
| chr2 Cufflinks exon182852566           | 182852626 | . | + | . | gene_id "XLOC_029469"; transcript_id "TCONS_00049470"; exon_number "3"; |
| oId "CUFF.54762.1"; tss_id "TSS37216"; |           |   |   |   |                                                                         |
| chr2 Cufflinks exon182888549           | 182888640 | . | + | . | gene_id "XLOC_029469"; transcript_id "TCONS_00049470"; exon_number "4"; |
| oId "CUFF.54762.1"; tss_id "TSS37216"; |           |   |   |   |                                                                         |
| chr2 Cufflinks exon182926169           | 182926206 | . | + | . | gene_id "XLOC_029469"; transcript_id "TCONS_00049470"; exon_number "5"; |
| oId "CUFF.54762.1"; tss_id "TSS37216"; |           |   |   |   |                                                                         |
| chr2 Cufflinks exon182928458           | 182928518 | . | + | . | gene_id "XLOC_029469"; transcript_id "TCONS_00049470"; exon_number "6"; |
| oId "CUFF.54762.1"; tss_id "TSS37216"; |           |   |   |   |                                                                         |
| chr2 Cufflinks exon182981934           | 182982195 | . | + | . | gene_id "XLOC_029469"; transcript_id "TCONS_00049470"; exon_number "7"; |
| oId "CUFF.54762.1"; tss_id "TSS37216"; |           |   |   |   |                                                                         |
| chr2 Cufflinks exon182993701           | 182996109 | . | + | . | gene_id "XLOC_029469"; transcript_id "TCONS_00049470"; exon_number "8"; |

|                                        |   |   |   |                                                                         |  |
|----------------------------------------|---|---|---|-------------------------------------------------------------------------|--|
| oId "CUFF.54762.1"; tss_id "TSS37216"; |   |   |   |                                                                         |  |
| chr2 Cufflinks exon192542798 192542967 | . | + | . | gene_id "XLOC_029573"; transcript_id "TCONS_00049603"; exon_number "1"; |  |
| oId "CUFF.55322.1"; tss_id "TSS37333"; |   |   |   |                                                                         |  |
| chr2 Cufflinks exon192543716 192543854 | . | + | . | gene_id "XLOC_029573"; transcript_id "TCONS_00049603"; exon_number "2"; |  |
| oId "CUFF.55322.1"; tss_id "TSS37333"; |   |   |   |                                                                         |  |
| chr2 Cufflinks exon192546672 192546743 | . | + | . | gene_id "XLOC_029573"; transcript_id "TCONS_00049603"; exon_number "3"; |  |
| oId "CUFF.55322.1"; tss_id "TSS37333"; |   |   |   |                                                                         |  |
| chr2 Cufflinks exon192547218 192548221 | . | + | . | gene_id "XLOC_029573"; transcript_id "TCONS_00049603"; exon_number "4"; |  |
| oId "CUFF.55322.1"; tss_id "TSS37333"; |   |   |   |                                                                         |  |
| chr2 Cufflinks exon197124592 197124885 | . | + | . | gene_id "XLOC_029591"; transcript_id "TCONS_00049631"; exon_number "1"; |  |
| oId "CUFF.55391.1"; tss_id "TSS37353"; |   |   |   |                                                                         |  |
| chr2 Cufflinks exon197124964 197124964 | . | + | . | gene_id "XLOC_029591"; transcript_id "TCONS_00049631"; exon_number "2"; |  |
| oId "CUFF.55391.1"; tss_id "TSS37353"; |   |   |   |                                                                         |  |
| chr2 Cufflinks exon197125055 197125096 | . | + | . | gene_id "XLOC_029591"; transcript_id "TCONS_00049631"; exon_number "3"; |  |
| oId "CUFF.55391.1"; tss_id "TSS37353"; |   |   |   |                                                                         |  |
| chr2 Cufflinks exon197127775 197128928 | . | + | . | gene_id "XLOC_029591"; transcript_id "TCONS_00049631"; exon_number "4"; |  |
| oId "CUFF.55391.1"; tss_id "TSS37353"; |   |   |   |                                                                         |  |
| chr2 Cufflinks exon197124748 197124885 | . | + | . | gene_id "XLOC_029591"; transcript_id "TCONS_00049632"; exon_number "1"; |  |
| oId "CUFF.55391.2"; tss_id "TSS37354"; |   |   |   |                                                                         |  |
| chr2 Cufflinks exon197124965 197125096 | . | + | . | gene_id "XLOC_029591"; transcript_id "TCONS_00049632"; exon_number "2"; |  |
| oId "CUFF.55391.2"; tss_id "TSS37354"; |   |   |   |                                                                         |  |
| chr2 Cufflinks exon197127775 197128928 | . | + | . | gene_id "XLOC_029591"; transcript_id "TCONS_00049632"; exon_number "3"; |  |
| oId "CUFF.55391.2"; tss_id "TSS37354"; |   |   |   |                                                                         |  |
| chr2 Cufflinks exon198062799 198062813 | . | + | . | gene_id "XLOC_029596"; transcript_id "TCONS_00049643"; exon_number "1"; |  |
| oId "CUFF.55433.1"; tss_id "TSS37360"; |   |   |   |                                                                         |  |
| chr2 Cufflinks exon198063642 198063925 | . | + | . | gene_id "XLOC_029596"; transcript_id "TCONS_00049643"; exon_number "2"; |  |
| oId "CUFF.55433.1"; tss_id "TSS37360"; |   |   |   |                                                                         |  |
| chr2 Cufflinks exon198681349 198681705 | . | + | . | gene_id "XLOC_029619"; transcript_id "TCONS_00049672"; exon_number "1"; |  |
| oId "CUFF.55531.1"; tss_id "TSS37386"; |   |   |   |                                                                         |  |
| chr2 Cufflinks exon198682645 198682786 | . | + | . | gene_id "XLOC_029619"; transcript_id "TCONS_00049672"; exon_number "2"; |  |
| oId "CUFF.55531.1"; tss_id "TSS37386"; |   |   |   |                                                                         |  |
| chr2 Cufflinks exon198683304 198685537 | . | + | . | gene_id "XLOC_029619"; transcript_id "TCONS_00049672"; exon_number "3"; |  |
| oId "CUFF.55531.1"; tss_id "TSS37386"; |   |   |   |                                                                         |  |
| chr2 Cufflinks exon198745235 198746776 | . | + | . | gene_id "XLOC_029620"; transcript_id "TCONS_00049673"; exon_number "1"; |  |
| oId "CUFF.55532.1"; tss_id "TSS37387"; |   |   |   |                                                                         |  |
| chr2 Cufflinks exon198749939 198751127 | . | + | . | gene_id "XLOC_029620"; transcript_id "TCONS_00049673"; exon_number "2"; |  |
| oId "CUFF.55532.1"; tss_id "TSS37387"; |   |   |   |                                                                         |  |
| chr2 Cufflinks exon203879354 203879431 | . | + | . | gene_id "XLOC_029683"; transcript_id "TCONS_00049765"; exon_number "1"; |  |
| oId "CUFF.55776.2"; tss_id "TSS37463"; |   |   |   |                                                                         |  |
| chr2 Cufflinks exon203880879 203881158 | . | + | . | gene_id "XLOC_029683"; transcript_id "TCONS_00049765"; exon_number "2"; |  |
| oId "CUFF.55776.2"; tss_id "TSS37463"; |   |   |   |                                                                         |  |
| chr2 Cufflinks exon203881322 203881599 | . | + | . | gene_id "XLOC_029683"; transcript_id "TCONS_00049765"; exon_number "3"; |  |
| oId "CUFF.55776.2"; tss_id "TSS37463"; |   |   |   |                                                                         |  |



chr2 Cufflinks exon204822787 204822806 . + . gene\_id "XLOC\_029693"; transcript\_id "TCONS\_00049797"; exon\_number "1";  
oId "CUFF.55808.4"; tss\_id "TSS37482";

chr2 Cufflinks exon204824309 204826322 . + . gene\_id "XLOC\_029693"; transcript\_id "TCONS\_00049797"; exon\_number "2";  
oId "CUFF.55808.4"; tss\_id "TSS37482";

chr2 Cufflinks exon216226761 216227657 . + . gene\_id "XLOC\_029758"; transcript\_id "TCONS\_00049910"; exon\_number "1";  
oId "CUFF.56162.1"; tss\_id "TSS37560";

chr2 Cufflinks exon216231656 216233299 . + . gene\_id "XLOC\_029758"; transcript\_id "TCONS\_00049910"; exon\_number "2";  
oId "CUFF.56162.1"; tss\_id "TSS37560";

chr2 Cufflinks exon220163624 220163850 . + . gene\_id "XLOC\_029825"; transcript\_id "TCONS\_00050017"; exon\_number "1";  
oId "CUFF.56375.2"; tss\_id "TSS37637";

chr2 Cufflinks exon220164348 220164892 . + . gene\_id "XLOC\_029825"; transcript\_id "TCONS\_00050017"; exon\_number "2";  
oId "CUFF.56375.2"; tss\_id "TSS37637";

chr2 Cufflinks exon220165097 220165146 . + . gene\_id "XLOC\_029825"; transcript\_id "TCONS\_00050017"; exon\_number "3";  
oId "CUFF.56375.2"; tss\_id "TSS37637";

chr2 Cufflinks exon220168399 220168573 . + . gene\_id "XLOC\_029825"; transcript\_id "TCONS\_00050017"; exon\_number "4";  
oId "CUFF.56375.2"; tss\_id "TSS37637";

chr2 Cufflinks exon220168719 220168852 . + . gene\_id "XLOC\_029825"; transcript\_id "TCONS\_00050017"; exon\_number "5";  
oId "CUFF.56375.2"; tss\_id "TSS37637";

chr2 Cufflinks exon220163624 220163850 . + . gene\_id "XLOC\_029825"; transcript\_id "TCONS\_00050016"; exon\_number "1";  
oId "CUFF.56375.1"; tss\_id "TSS37637";

chr2 Cufflinks exon220164348 220164892 . + . gene\_id "XLOC\_029825"; transcript\_id "TCONS\_00050016"; exon\_number "2";  
oId "CUFF.56375.1"; tss\_id "TSS37637";

chr2 Cufflinks exon220165097 220165153 . + . gene\_id "XLOC\_029825"; transcript\_id "TCONS\_00050016"; exon\_number "3";  
oId "CUFF.56375.1"; tss\_id "TSS37637";

chr2 Cufflinks exon220168726 220168852 . + . gene\_id "XLOC\_029825"; transcript\_id "TCONS\_00050016"; exon\_number "4";  
oId "CUFF.56375.1"; tss\_id "TSS37637";

chr2 Cufflinks exon220163640 220163850 . + . gene\_id "XLOC\_029825"; transcript\_id "TCONS\_00050018"; exon\_number "1";  
oId "CUFF.56375.3"; tss\_id "TSS37637";

chr2 Cufflinks exon220164348 220164892 . + . gene\_id "XLOC\_029825"; transcript\_id "TCONS\_00050018"; exon\_number "2";  
oId "CUFF.56375.3"; tss\_id "TSS37637";

chr2 Cufflinks exon220165097 220165146 . + . gene\_id "XLOC\_029825"; transcript\_id "TCONS\_00050018"; exon\_number "3";  
oId "CUFF.56375.3"; tss\_id "TSS37637";

chr2 Cufflinks exon220168719 220168852 . + . gene\_id "XLOC\_029825"; transcript\_id "TCONS\_00050018"; exon\_number "4";  
oId "CUFF.56375.3"; tss\_id "TSS37637";

chr2 Cufflinks exon242195969 242195978 . + . gene\_id "XLOC\_030038"; transcript\_id "TCONS\_00050380"; exon\_number "1";  
oId "CUFF.57026.1"; tss\_id "TSS37894";

chr2 Cufflinks exon242384587 242386536 . + . gene\_id "XLOC\_030038"; transcript\_id "TCONS\_00050380"; exon\_number "2";  
oId "CUFF.57026.1"; tss\_id "TSS37894";

chr2 Cufflinks exon42024 42305 . - . gene\_id "XLOC\_030096"; transcript\_id "TCONS\_00050477"; exon\_number "1"; oId  
"CUFF.48568.1"; tss\_id "TSS37970";

chr2 Cufflinks exon42809 44190 . - . gene\_id "XLOC\_030096"; transcript\_id "TCONS\_00050477"; exon\_number "2"; oId  
"CUFF.48568.1"; tss\_id "TSS37970";

chr2 Cufflinks exon1126083 1126506 . - . gene\_id "XLOC\_030127"; transcript\_id "TCONS\_00050539"; exon\_number "1"; oId

"CUFF.48653.2"; tss\_id "TSS38014";  
chr2 Cufflinks exon1129464 1129947 . - . gene\_id "XLOC\_030127"; transcript\_id "TCONS\_00050539"; exon\_number "2"; oId  
"CUFF.48653.2"; tss\_id "TSS38014";  
chr2 Cufflinks exon1792885 1795779 . - . gene\_id "XLOC\_030137"; transcript\_id "TCONS\_00050555"; exon\_number "1"; oId  
"CUFF.48701.6"; tss\_id "TSS38031";  
chr2 Cufflinks exon1796093 1796236 . - . gene\_id "XLOC\_030137"; transcript\_id "TCONS\_00050555"; exon\_number "2"; oId  
"CUFF.48701.6"; tss\_id "TSS38031";  
chr2 Cufflinks exon1799020 1799038 . - . gene\_id "XLOC\_030137"; transcript\_id "TCONS\_00050555"; exon\_number "3"; oId  
"CUFF.48701.6"; tss\_id "TSS38031";  
chr2 Cufflinks exon65609939 65610205 . - . gene\_id "XLOC\_030802"; transcript\_id "TCONS\_00051524"; exon\_number "1";  
oId "CUFF.51033.1"; tss\_id "TSS38831";  
chr2 Cufflinks exon65611812 65612096 . - . gene\_id "XLOC\_030802"; transcript\_id "TCONS\_00051524"; exon\_number "2";  
oId "CUFF.51033.1"; tss\_id "TSS38831";  
chr2 Cufflinks exon71174158 71174801 . - . gene\_id "XLOC\_030870"; transcript\_id "TCONS\_00051642"; exon\_number "1";  
oId "CUFF.51266.4"; tss\_id "TSS38925";  
chr2 Cufflinks exon71175357 71175742 . - . gene\_id "XLOC\_030870"; transcript\_id "TCONS\_00051642"; exon\_number "2";  
oId "CUFF.51266.4"; tss\_id "TSS38925";  
chr2 Cufflinks exon73169165 73172228 . - . gene\_id "XLOC\_030886"; transcript\_id "TCONS\_00051676"; exon\_number "1";  
oId "CUFF.51321.2"; tss\_id "TSS38951";  
chr2 Cufflinks exon73194366 73194411 . - . gene\_id "XLOC\_030886"; transcript\_id "TCONS\_00051676"; exon\_number "2";  
oId "CUFF.51321.2"; tss\_id "TSS38951";  
chr2 Cufflinks exon73285837 73286196 . - . gene\_id "XLOC\_030887"; transcript\_id "TCONS\_00051680"; exon\_number "1";  
oId "CUFF.51325.1"; tss\_id "TSS38954";  
chr2 Cufflinks exon73286413 73286435 . - . gene\_id "XLOC\_030887"; transcript\_id "TCONS\_00051680"; exon\_number "2";  
oId "CUFF.51325.1"; tss\_id "TSS38954";  
chr2 Cufflinks exon75785610 75785825 . - . gene\_id "XLOC\_030954"; transcript\_id "TCONS\_00051771"; exon\_number "1";  
oId "CUFF.51631.5"; tss\_id "TSS39030";  
chr2 Cufflinks exon75787806 75788045 . - . gene\_id "XLOC\_030954"; transcript\_id "TCONS\_00051771"; exon\_number "2";  
oId "CUFF.51631.5"; tss\_id "TSS39030";  
chr2 Cufflinks exon75788383 75788446 . - . gene\_id "XLOC\_030954"; transcript\_id "TCONS\_00051771"; exon\_number "3";  
oId "CUFF.51631.5"; tss\_id "TSS39030";  
chr2 Cufflinks exon87042460 87042841 . - . gene\_id "XLOC\_031010"; transcript\_id "TCONS\_00051863"; exon\_number "1";  
oId "CUFF.51852.2"; tss\_id "TSS39104";  
chr2 Cufflinks exon87049444 87049497 . - . gene\_id "XLOC\_031010"; transcript\_id "TCONS\_00051863"; exon\_number "2";  
oId "CUFF.51852.2"; tss\_id "TSS39104";  
chr2 Cufflinks exon87053076 87053335 . - . gene\_id "XLOC\_031010"; transcript\_id "TCONS\_00051863"; exon\_number "3";  
oId "CUFF.51852.2"; tss\_id "TSS39104";  
chr2 Cufflinks exon99767946 99770890 . - . gene\_id "XLOC\_031125"; transcript\_id "TCONS\_00052076"; exon\_number "1";  
oId "CUFF.52289.1"; tss\_id "TSS39268";  
chr2 Cufflinks exon99771300 99771350 . - . gene\_id "XLOC\_031125"; transcript\_id "TCONS\_00052076"; exon\_number "2";  
oId "CUFF.52289.1"; tss\_id "TSS39268";  
chr2 Cufflinks exon100079218 100079282 . - . gene\_id "XLOC\_031138"; transcript\_id "TCONS\_00052091"; exon\_number "1";  
oId "CUFF.52374.1"; tss\_id "TSS39281";

|                                        |           |   |   |   |                                                                         |
|----------------------------------------|-----------|---|---|---|-------------------------------------------------------------------------|
| chr2 Cufflinks exon100080385           | 100080540 | . | - | . | gene_id "XLOC_031138"; transcript_id "TCONS_00052091"; exon_number "2"; |
| oId "CUFF.52374.1"; tss_id "TSS39281"; |           |   |   |   |                                                                         |
| chr2 Cufflinks exon100754041           | 100754399 | . | - | . | gene_id "XLOC_031142"; transcript_id "TCONS_00052103"; exon_number "1"; |
| oId "CUFF.52378.7"; tss_id "TSS39287"; |           |   |   |   |                                                                         |
| chr2 Cufflinks exon100758946           | 100759103 | . | - | . | gene_id "XLOC_031142"; transcript_id "TCONS_00052103"; exon_number "2"; |
| oId "CUFF.52378.7"; tss_id "TSS39287"; |           |   |   |   |                                                                         |
| chr2 Cufflinks exon100603323           | 100603333 | . | - | . | gene_id "XLOC_031143"; transcript_id "TCONS_00052101"; exon_number "1"; |
| oId "CUFF.52379.1"; tss_id "TSS39288"; |           |   |   |   |                                                                         |
| chr2 Cufflinks exon100603368           | 100603598 | . | - | . | gene_id "XLOC_031143"; transcript_id "TCONS_00052101"; exon_number "2"; |
| oId "CUFF.52379.1"; tss_id "TSS39288"; |           |   |   |   |                                                                         |
| chr2 Cufflinks exon100709806           | 100709891 | . | - | . | gene_id "XLOC_031144"; transcript_id "TCONS_00052102"; exon_number "1"; |
| oId "CUFF.52380.1"; tss_id "TSS39289"; |           |   |   |   |                                                                         |
| chr2 Cufflinks exon100710066           | 100710296 | . | - | . | gene_id "XLOC_031144"; transcript_id "TCONS_00052102"; exon_number "2"; |
| oId "CUFF.52380.1"; tss_id "TSS39289"; |           |   |   |   |                                                                         |
| chr2 Cufflinks exon102045989           | 102046228 | . | - | . | gene_id "XLOC_031161"; transcript_id "TCONS_00052153"; exon_number "1"; |
| oId "CUFF.52430.1"; tss_id "TSS39320"; |           |   |   |   |                                                                         |
| chr2 Cufflinks exon102046618           | 102046653 | . | - | . | gene_id "XLOC_031161"; transcript_id "TCONS_00052153"; exon_number "2"; |
| oId "CUFF.52430.1"; tss_id "TSS39320"; |           |   |   |   |                                                                         |
| chr2 Cufflinks exon105481872           | 105484850 | . | - | . | gene_id "XLOC_031172"; transcript_id "TCONS_00052170"; exon_number "1"; |
| oId "CUFF.52504.1"; tss_id "TSS39332"; |           |   |   |   |                                                                         |
| chr2 Cufflinks exon105489172           | 105489186 | . | - | . | gene_id "XLOC_031172"; transcript_id "TCONS_00052170"; exon_number "2"; |
| oId "CUFF.52504.1"; tss_id "TSS39332"; |           |   |   |   |                                                                         |
| chr2 Cufflinks exon105485684           | 105486408 | . | - | . | gene_id "XLOC_031172"; transcript_id "TCONS_00052171"; exon_number "1"; |
| oId "CUFF.52504.2"; tss_id "TSS39333"; |           |   |   |   |                                                                         |
| chr2 Cufflinks exon105488704           | 105489053 | . | - | . | gene_id "XLOC_031172"; transcript_id "TCONS_00052171"; exon_number "2"; |
| oId "CUFF.52504.2"; tss_id "TSS39333"; |           |   |   |   |                                                                         |
| chr2 Cufflinks exon105947909           | 105951525 | . | - | . | gene_id "XLOC_031178"; transcript_id "TCONS_00052184"; exon_number "1"; |
| oId "CUFF.52521.3"; tss_id "TSS39342"; |           |   |   |   |                                                                         |
| chr2 Cufflinks exon105952762           | 105953974 | . | - | . | gene_id "XLOC_031178"; transcript_id "TCONS_00052184"; exon_number "2"; |
| oId "CUFF.52521.3"; tss_id "TSS39342"; |           |   |   |   |                                                                         |
| chr2 Cufflinks exon105947909           | 105951510 | . | - | . | gene_id "XLOC_031178"; transcript_id "TCONS_00052183"; exon_number "1"; |
| oId "CUFF.52521.2"; tss_id "TSS39342"; |           |   |   |   |                                                                         |
| chr2 Cufflinks exon105951616           | 105953974 | . | - | . | gene_id "XLOC_031178"; transcript_id "TCONS_00052183"; exon_number "2"; |
| oId "CUFF.52521.2"; tss_id "TSS39342"; |           |   |   |   |                                                                         |
| chr2 Cufflinks exon105947909           | 105951525 | . | - | . | gene_id "XLOC_031178"; transcript_id "TCONS_00052182"; exon_number "1"; |
| oId "CUFF.52521.1"; tss_id "TSS39342"; |           |   |   |   |                                                                         |
| chr2 Cufflinks exon105951616           | 105953974 | . | - | . | gene_id "XLOC_031178"; transcript_id "TCONS_00052182"; exon_number "2"; |
| oId "CUFF.52521.1"; tss_id "TSS39342"; |           |   |   |   |                                                                         |
| chr2 Cufflinks exon115901625           | 115901945 | . | - | . | gene_id "XLOC_031315"; transcript_id "TCONS_00052386"; exon_number "1"; |
| oId "CUFF.52941.1"; tss_id "TSS39506"; |           |   |   |   |                                                                         |
| chr2 Cufflinks exon115902436           | 115902604 | . | - | . | gene_id "XLOC_031315"; transcript_id "TCONS_00052386"; exon_number "2"; |
| oId "CUFF.52941.1"; tss_id "TSS39506"; |           |   |   |   |                                                                         |
| chr2 Cufflinks exon115918681           | 115918920 | . | - | . | gene_id "XLOC_031315"; transcript_id "TCONS_00052386"; exon_number "3"; |

oId "CUFF.52941.1"; tss\_id "TSS39506";  
chr2 Cufflinks exon135213330 135214347 . - . gene\_id "XLOC\_031465"; transcript\_id "TCONS\_00052622"; exon\_number "1";  
oId "CUFF.53745.5"; tss\_id "TSS39693";  
chr2 Cufflinks exon135215603 135215744 . - . gene\_id "XLOC\_031465"; transcript\_id "TCONS\_00052622"; exon\_number "2";  
oId "CUFF.53745.5"; tss\_id "TSS39693";  
chr2 Cufflinks exon135223685 135223796 . - . gene\_id "XLOC\_031465"; transcript\_id "TCONS\_00052622"; exon\_number "3";  
oId "CUFF.53745.5"; tss\_id "TSS39693";  
chr2 Cufflinks exon135260472 135260568 . - . gene\_id "XLOC\_031465"; transcript\_id "TCONS\_00052622"; exon\_number "4";  
oId "CUFF.53745.5"; tss\_id "TSS39693";  
chr2 Cufflinks exon135308141 135308232 . - . gene\_id "XLOC\_031465"; transcript\_id "TCONS\_00052622"; exon\_number "5";  
oId "CUFF.53745.5"; tss\_id "TSS39693";  
chr2 Cufflinks exon135414047 135414146 . - . gene\_id "XLOC\_031465"; transcript\_id "TCONS\_00052622"; exon\_number "6";  
oId "CUFF.53745.5"; tss\_id "TSS39693";  
chr2 Cufflinks exon149682198 149682242 . - . gene\_id "XLOC\_031516"; transcript\_id "TCONS\_00052706"; exon\_number "1";  
oId "CUFF.53944.1"; tss\_id "TSS39756";  
chr2 Cufflinks exon149684358 149684821 . - . gene\_id "XLOC\_031516"; transcript\_id "TCONS\_00052706"; exon\_number "2";  
oId "CUFF.53944.1"; tss\_id "TSS39756";  
chr2 Cufflinks exon161258197 161258613 . - . gene\_id "XLOC\_031597"; transcript\_id "TCONS\_00052855"; exon\_number "1";  
oId "CUFF.54180.1"; tss\_id "TSS39864";  
chr2 Cufflinks exon161259760 161260110 . - . gene\_id "XLOC\_031597"; transcript\_id "TCONS\_00052855"; exon\_number "2";  
oId "CUFF.54180.1"; tss\_id "TSS39864";  
chr2 Cufflinks exon219231058 219231521 . - . gene\_id "XLOC\_032127"; transcript\_id "TCONS\_00053714"; exon\_number "1";  
oId "CUFF.56292.2"; tss\_id "TSS40542";  
chr2 Cufflinks exon219231650 219231750 . - . gene\_id "XLOC\_032127"; transcript\_id "TCONS\_00053714"; exon\_number "2";  
oId "CUFF.56292.2"; tss\_id "TSS40542";  
chr2 Cufflinks exon219232314 219232625 . - . gene\_id "XLOC\_032127"; transcript\_id "TCONS\_00053714"; exon\_number "3";  
oId "CUFF.56292.2"; tss\_id "TSS40542";  
chr2 Cufflinks exon219231058 219231517 . - . gene\_id "XLOC\_032127"; transcript\_id "TCONS\_00053715"; exon\_number "1";  
oId "CUFF.56292.1"; tss\_id "TSS40542";  
chr2 Cufflinks exon219231650 219231750 . - . gene\_id "XLOC\_032127"; transcript\_id "TCONS\_00053715"; exon\_number "2";  
oId "CUFF.56292.1"; tss\_id "TSS40542";  
chr2 Cufflinks exon219232314 219232649 . - . gene\_id "XLOC\_032127"; transcript\_id "TCONS\_00053715"; exon\_number "3";  
oId "CUFF.56292.1"; tss\_id "TSS40542";  
chr2 Cufflinks exon225383524 225383708 . - . gene\_id "XLOC\_032181"; transcript\_id "TCONS\_00053825"; exon\_number "1";  
oId "CUFF.56453.1"; tss\_id "TSS40616";  
chr2 Cufflinks exon225393666 225393712 . - . gene\_id "XLOC\_032181"; transcript\_id "TCONS\_00053825"; exon\_number "2";  
oId "CUFF.56453.1"; tss\_id "TSS40616";  
chr2 Cufflinks exon231185384 231185468 . - . gene\_id "XLOC\_032214"; transcript\_id "TCONS\_00053878"; exon\_number "1";  
oId "CUFF.56552.1"; tss\_id "TSS40656";  
chr2 Cufflinks exon231190536 231191485 . - . gene\_id "XLOC\_032214"; transcript\_id "TCONS\_00053878"; exon\_number "2";  
oId "CUFF.56552.1"; tss\_id "TSS40656";  
chr2 Cufflinks exon238597886 238597913 . - . gene\_id "XLOC\_032293"; transcript\_id "TCONS\_00054004"; exon\_number "1";  
oId "CUFF.56806.4"; tss\_id "TSS40753";

|                                             |           |   |   |   |                                                                             |
|---------------------------------------------|-----------|---|---|---|-----------------------------------------------------------------------------|
| chr2 Cufflinks exon238599854                | 238600416 | . | - | . | gene_id "XLOC_032293"; transcript_id "TCONS_00054004"; exon_number "2";     |
| oId "CUFF.56806.4"; tss_id "TSS40753";      |           |   |   |   |                                                                             |
| chr2 Cufflinks exon240115027                | 240116658 | . | - | . | gene_id "XLOC_032307"; transcript_id "TCONS_00054040"; exon_number "1";     |
| oId "CUFF.56871.1"; tss_id "TSS40773";      |           |   |   |   |                                                                             |
| chr2 Cufflinks exon240116813                | 240117153 | . | - | . | gene_id "XLOC_032307"; transcript_id "TCONS_00054040"; exon_number "2";     |
| oId "CUFF.56871.1"; tss_id "TSS40773";      |           |   |   |   |                                                                             |
| chr20 Cufflinks exon42694748                | 42694750  | . | + | . | gene_id "XLOC_032828"; transcript_id "TCONS_00054861"; exon_number          |
| "1"; oId "CUFF.58802.9"; tss_id "TSS41410"; |           |   |   |   |                                                                             |
| chr20 Cufflinks exon42695373                | 42695497  | . | + | . | gene_id "XLOC_032828"; transcript_id "TCONS_00054861"; exon_number          |
| "2"; oId "CUFF.58802.9"; tss_id "TSS41410"; |           |   |   |   |                                                                             |
| chr20 Cufflinks exon42697290                | 42698259  | . | + | . | gene_id "XLOC_032828"; transcript_id "TCONS_00054861"; exon_number          |
| "3"; oId "CUFF.58802.9"; tss_id "TSS41410"; |           |   |   |   |                                                                             |
| chr20 Cufflinks exon58630516                | 58631063  | . | + | . | gene_id "XLOC_033046"; transcript_id "TCONS_00055163"; exon_number          |
| "1"; oId "CUFF.59438.1"; tss_id "TSS41663"; |           |   |   |   |                                                                             |
| chr20 Cufflinks exon58632385                | 58634041  | . | + | . | gene_id "XLOC_033046"; transcript_id "TCONS_00055163"; exon_number          |
| "2"; oId "CUFF.59438.1"; tss_id "TSS41663"; |           |   |   |   |                                                                             |
| chr20 Cufflinks exon58644888                | 58648008  | . | + | . | gene_id "XLOC_033046"; transcript_id "TCONS_00055163"; exon_number          |
| "3"; oId "CUFF.59438.1"; tss_id "TSS41663"; |           |   |   |   |                                                                             |
| chr20 Cufflinks exon58642478                | 58644233  | . | + | . | gene_id "XLOC_033046"; transcript_id "TCONS_00055167"; exon_number          |
| "1"; oId "CUFF.59438.8"; tss_id "TSS41666"; |           |   |   |   |                                                                             |
| chr20 Cufflinks exon58644888                | 58645098  | . | + | . | gene_id "XLOC_033046"; transcript_id "TCONS_00055167"; exon_number          |
| "2"; oId "CUFF.59438.8"; tss_id "TSS41666"; |           |   |   |   |                                                                             |
| chr20 Cufflinks exon58645675                | 58648008  | . | + | . | gene_id "XLOC_033046"; transcript_id "TCONS_00055167"; exon_number          |
| "3"; oId "CUFF.59438.8"; tss_id "TSS41666"; |           |   |   |   |                                                                             |
| chr20 Cufflinks exon62719739                | 62719758  | . | + | . | gene_id "XLOC_033236"; transcript_id "TCONS_00055449"; exon_number          |
| "1"; oId "CUFF.59845.1"; tss_id "TSS41903"; |           |   |   |   |                                                                             |
| chr20 Cufflinks exon62719950                | 62720073  | . | + | . | gene_id "XLOC_033236"; transcript_id "TCONS_00055449"; exon_number          |
| "2"; oId "CUFF.59845.1"; tss_id "TSS41903"; |           |   |   |   |                                                                             |
| chr20 Cufflinks exon62720132                | 62720293  | . | + | . | gene_id "XLOC_033236"; transcript_id "TCONS_00055449"; exon_number          |
| "3"; oId "CUFF.59845.1"; tss_id "TSS41903"; |           |   |   |   |                                                                             |
| chr20 Cufflinks exon62791012                | 62791061  | . | + | . | gene_id "XLOC_033242"; transcript_id "TCONS_00055457"; exon_number          |
| "1"; oId "CUFF.59855.1"; tss_id "TSS41910"; |           |   |   |   |                                                                             |
| chr20 Cufflinks exon62791505                | 62791593  | . | + | . | gene_id "XLOC_033242"; transcript_id "TCONS_00055457"; exon_number          |
| "2"; oId "CUFF.59855.1"; tss_id "TSS41910"; |           |   |   |   |                                                                             |
| chr20 Cufflinks exon62791783                | 62791907  | . | + | . | gene_id "XLOC_033242"; transcript_id "TCONS_00055457"; exon_number          |
| "3"; oId "CUFF.59855.1"; tss_id "TSS41910"; |           |   |   |   |                                                                             |
| chr20 Cufflinks exon62792713                | 62794332  | . | + | . | gene_id "XLOC_033242"; transcript_id "TCONS_00055457"; exon_number          |
| "4"; oId "CUFF.59855.1"; tss_id "TSS41910"; |           |   |   |   |                                                                             |
| chr20 Cufflinks exon3648615                 | 3649647   | . | - | . | gene_id "XLOC_033316"; transcript_id "TCONS_00055592"; exon_number "1"; oId |
| "CUFF.57451.5"; tss_id "TSS41999";          |           |   |   |   |                                                                             |
| chr20 Cufflinks exon3649946                 | 3650017   | . | - | . | gene_id "XLOC_033316"; transcript_id "TCONS_00055592"; exon_number "2"; oId |
| "CUFF.57451.5"; tss_id "TSS41999";          |           |   |   |   |                                                                             |
| chr20 Cufflinks exon3650193                 | 3650284   | . | - | . | gene_id "XLOC_033316"; transcript_id "TCONS_00055592"; exon_number "3"; oId |

"CUFF.57451.5"; tss\_id "TSS41999";  
chr20 Cufflinks exon3651436 3651448 . - . gene\_id "XLOC\_033316"; transcript\_id "TCONS\_00055592"; exon\_number "4"; oId  
"CUFF.57451.5"; tss\_id "TSS41999";  
chr20 Cufflinks exon3648615 3649644 . - . gene\_id "XLOC\_033316"; transcript\_id "TCONS\_00055593"; exon\_number "1"; oId  
"CUFF.57451.1"; tss\_id "TSS42000";  
chr20 Cufflinks exon3649946 3650017 . - . gene\_id "XLOC\_033316"; transcript\_id "TCONS\_00055593"; exon\_number "2"; oId  
"CUFF.57451.1"; tss\_id "TSS42000";  
chr20 Cufflinks exon3650193 3650284 . - . gene\_id "XLOC\_033316"; transcript\_id "TCONS\_00055593"; exon\_number "3"; oId  
"CUFF.57451.1"; tss\_id "TSS42000";  
chr20 Cufflinks exon3651436 3651649 . - . gene\_id "XLOC\_033316"; transcript\_id "TCONS\_00055593"; exon\_number "4"; oId  
"CUFF.57451.1"; tss\_id "TSS42000";  
chr20 Cufflinks exon20370190 20373897 . - . gene\_id "XLOC\_033442"; transcript\_id "TCONS\_00055783"; exon\_number  
"1"; oId "CUFF.57912.2"; tss\_id "TSS42154";  
chr20 Cufflinks exon20377339 20377378 . - . gene\_id "XLOC\_033442"; transcript\_id "TCONS\_00055783"; exon\_number  
"2"; oId "CUFF.57912.2"; tss\_id "TSS42154";  
chr20 Cufflinks exon20392671 20392792 . - . gene\_id "XLOC\_033442"; transcript\_id "TCONS\_00055783"; exon\_number  
"3"; oId "CUFF.57912.2"; tss\_id "TSS42154";  
chr20 Cufflinks exon20453473 20453600 . - . gene\_id "XLOC\_033442"; transcript\_id "TCONS\_00055783"; exon\_number  
"4"; oId "CUFF.57912.2"; tss\_id "TSS42154";  
chr20 Cufflinks exon20469502 20469536 . - . gene\_id "XLOC\_033442"; transcript\_id "TCONS\_00055783"; exon\_number  
"5"; oId "CUFF.57912.2"; tss\_id "TSS42154";  
chr20 Cufflinks exon20471812 20472182 . - . gene\_id "XLOC\_033444"; transcript\_id "TCONS\_00055789"; exon\_number  
"1"; oId "CUFF.57915.1"; tss\_id "TSS42157";  
chr20 Cufflinks exon20473424 20473480 . - . gene\_id "XLOC\_033444"; transcript\_id "TCONS\_00055789"; exon\_number  
"2"; oId "CUFF.57915.1"; tss\_id "TSS42157";  
chr20 Cufflinks exon24937784 24938473 . - . gene\_id "XLOC\_033506"; transcript\_id "TCONS\_00055871"; exon\_number  
"1"; oId "CUFF.58038.1"; tss\_id "TSS42227";  
chr20 Cufflinks exon24938651 24939698 . - . gene\_id "XLOC\_033506"; transcript\_id "TCONS\_00055871"; exon\_number  
"2"; oId "CUFF.58038.1"; tss\_id "TSS42227";  
chr20 Cufflinks exon31290493 31291260 . - . gene\_id "XLOC\_033564"; transcript\_id "TCONS\_00055976"; exon\_number  
"1"; oId "CUFF.58292.5"; tss\_id "TSS42308";  
chr20 Cufflinks exon31291642 31291705 . - . gene\_id "XLOC\_033564"; transcript\_id "TCONS\_00055976"; exon\_number  
"2"; oId "CUFF.58292.5"; tss\_id "TSS42308";  
chr20 Cufflinks exon33148346 33148783 . - . gene\_id "XLOC\_033597"; transcript\_id "TCONS\_00056022"; exon\_number  
"1"; oId "CUFF.58404.1"; tss\_id "TSS42346";  
chr20 Cufflinks exon33150672 33150711 . - . gene\_id "XLOC\_033597"; transcript\_id "TCONS\_00056022"; exon\_number  
"2"; oId "CUFF.58404.1"; tss\_id "TSS42346";  
chr20 Cufflinks exon35204840 35204898 . - . gene\_id "XLOC\_033623"; transcript\_id "TCONS\_00056086"; exon\_number  
"1"; oId "CUFF.58520.1"; tss\_id "TSS42384";  
chr20 Cufflinks exon35230312 35230395 . - . gene\_id "XLOC\_033623"; transcript\_id "TCONS\_00056086"; exon\_number  
"2"; oId "CUFF.58520.1"; tss\_id "TSS42384";  
chr20 Cufflinks exon35231101 35231144 . - . gene\_id "XLOC\_033623"; transcript\_id "TCONS\_00056086"; exon\_number  
"3"; oId "CUFF.58520.1"; tss\_id "TSS42384";

|       |                                              |          |          |   |   |   |                                                                    |
|-------|----------------------------------------------|----------|----------|---|---|---|--------------------------------------------------------------------|
| chr20 | Cufflinks exon                               | 35233345 | 35233956 | . | - | . | gene_id "XLOC_033623"; transcript_id "TCONS_00056086"; exon_number |
|       | "4"; oId "CUFF.58520.1"; tss_id "TSS42384";  |          |          |   |   |   |                                                                    |
| chr20 | Cufflinks exon                               | 35230336 | 35230395 | . | - | . | gene_id "XLOC_033623"; transcript_id "TCONS_00056089"; exon_number |
|       | "1"; oId "CUFF.58520.2"; tss_id "TSS42384";  |          |          |   |   |   |                                                                    |
| chr20 | Cufflinks exon                               | 35233345 | 35233956 | . | - | . | gene_id "XLOC_033623"; transcript_id "TCONS_00056089"; exon_number |
|       | "2"; oId "CUFF.58520.2"; tss_id "TSS42384";  |          |          |   |   |   |                                                                    |
| chr20 | Cufflinks exon                               | 43256750 | 43256905 | . | - | . | gene_id "XLOC_033718"; transcript_id "TCONS_00056238"; exon_number |
|       | "1"; oId "CUFF.58837.1"; tss_id "TSS42511";  |          |          |   |   |   |                                                                    |
| chr20 | Cufflinks exon                               | 43261633 | 43261698 | . | - | . | gene_id "XLOC_033718"; transcript_id "TCONS_00056238"; exon_number |
|       | "2"; oId "CUFF.58837.1"; tss_id "TSS42511";  |          |          |   |   |   |                                                                    |
| chr20 | Cufflinks exon                               | 62202272 | 62202582 | . | - | . | gene_id "XLOC_033963"; transcript_id "TCONS_00056655"; exon_number |
|       | "1"; oId "CUFF.59794.1"; tss_id "TSS42822";  |          |          |   |   |   |                                                                    |
| chr20 | Cufflinks exon                               | 62203042 | 62203117 | . | - | . | gene_id "XLOC_033963"; transcript_id "TCONS_00056655"; exon_number |
|       | "2"; oId "CUFF.59794.1"; tss_id "TSS42822";  |          |          |   |   |   |                                                                    |
| chr21 | Cufflinks exon                               | 30518174 | 30518236 | . | + | . | gene_id "XLOC_034057"; transcript_id "TCONS_00056806"; exon_number |
|       | "1"; oId "CUFF.60240.10"; tss_id "TSS42941"; |          |          |   |   |   |                                                                    |
| chr21 | Cufflinks exon                               | 30521510 | 30521571 | . | + | . | gene_id "XLOC_034057"; transcript_id "TCONS_00056806"; exon_number |
|       | "2"; oId "CUFF.60240.10"; tss_id "TSS42941"; |          |          |   |   |   |                                                                    |
| chr21 | Cufflinks exon                               | 30532262 | 30532377 | . | + | . | gene_id "XLOC_034057"; transcript_id "TCONS_00056806"; exon_number |
|       | "3"; oId "CUFF.60240.10"; tss_id "TSS42941"; |          |          |   |   |   |                                                                    |
| chr21 | Cufflinks exon                               | 30547033 | 30548210 | . | + | . | gene_id "XLOC_034057"; transcript_id "TCONS_00056806"; exon_number |
|       | "4"; oId "CUFF.60240.10"; tss_id "TSS42941"; |          |          |   |   |   |                                                                    |
| chr21 | Cufflinks exon                               | 30968360 | 30969098 | . | + | . | gene_id "XLOC_034116"; transcript_id "TCONS_00056867"; exon_number |
|       | "1"; oId "CUFF.60340.2"; tss_id "TSS43001";  |          |          |   |   |   |                                                                    |
| chr21 | Cufflinks exon                               | 30969890 | 30970014 | . | + | . | gene_id "XLOC_034116"; transcript_id "TCONS_00056867"; exon_number |
|       | "2"; oId "CUFF.60340.2"; tss_id "TSS43001";  |          |          |   |   |   |                                                                    |
| chr21 | Cufflinks exon                               | 31002859 | 31003067 | . | + | . | gene_id "XLOC_034116"; transcript_id "TCONS_00056867"; exon_number |
|       | "3"; oId "CUFF.60340.2"; tss_id "TSS43001";  |          |          |   |   |   |                                                                    |
| chr21 | Cufflinks exon                               | 30968360 | 30969098 | . | + | . | gene_id "XLOC_034116"; transcript_id "TCONS_00056868"; exon_number |
|       | "1"; oId "CUFF.60340.3"; tss_id "TSS43001";  |          |          |   |   |   |                                                                    |
| chr21 | Cufflinks exon                               | 30969890 | 30970014 | . | + | . | gene_id "XLOC_034116"; transcript_id "TCONS_00056868"; exon_number |
|       | "2"; oId "CUFF.60340.3"; tss_id "TSS43001";  |          |          |   |   |   |                                                                    |
| chr21 | Cufflinks exon                               | 31003313 | 31003435 | . | + | . | gene_id "XLOC_034116"; transcript_id "TCONS_00056868"; exon_number |
|       | "3"; oId "CUFF.60340.3"; tss_id "TSS43001";  |          |          |   |   |   |                                                                    |
| chr21 | Cufflinks exon                               | 31009604 | 31009753 | . | + | . | gene_id "XLOC_034116"; transcript_id "TCONS_00056868"; exon_number |
|       | "4"; oId "CUFF.60340.3"; tss_id "TSS43001";  |          |          |   |   |   |                                                                    |
| chr21 | Cufflinks exon                               | 31022949 | 31023094 | . | + | . | gene_id "XLOC_034116"; transcript_id "TCONS_00056868"; exon_number |
|       | "5"; oId "CUFF.60340.3"; tss_id "TSS43001";  |          |          |   |   |   |                                                                    |
| chr21 | Cufflinks exon                               | 31024492 | 31026812 | . | + | . | gene_id "XLOC_034116"; transcript_id "TCONS_00056868"; exon_number |
|       | "6"; oId "CUFF.60340.3"; tss_id "TSS43001";  |          |          |   |   |   |                                                                    |
| chr21 | Cufflinks exon                               | 30968360 | 30969098 | . | + | . | gene_id "XLOC_034116"; transcript_id "TCONS_00056870"; exon_number |
|       | "1"; oId "CUFF.60340.4"; tss_id "TSS43001";  |          |          |   |   |   |                                                                    |
| chr21 | Cufflinks exon                               | 30969890 | 30970014 | . | + | . | gene_id "XLOC_034116"; transcript_id "TCONS_00056870"; exon_number |

"2"; oId "CUFF.60340.4"; tss\_id "TSS43001";  
chr21 Cufflinks exon31003313 31003435 . + . gene\_id "XLOC\_034116"; transcript\_id "TCONS\_00056870"; exon\_number  
"3"; oId "CUFF.60340.4"; tss\_id "TSS43001";  
chr21 Cufflinks exon31009604 31009753 . + . gene\_id "XLOC\_034116"; transcript\_id "TCONS\_00056870"; exon\_number  
"4"; oId "CUFF.60340.4"; tss\_id "TSS43001";  
chr21 Cufflinks exon31022949 31023094 . + . gene\_id "XLOC\_034116"; transcript\_id "TCONS\_00056870"; exon\_number  
"5"; oId "CUFF.60340.4"; tss\_id "TSS43001";  
chr21 Cufflinks exon31024492 31025554 . + . gene\_id "XLOC\_034116"; transcript\_id "TCONS\_00056870"; exon\_number  
"6"; oId "CUFF.60340.4"; tss\_id "TSS43001";  
chr21 Cufflinks exon31028388 31030217 . + . gene\_id "XLOC\_034116"; transcript\_id "TCONS\_00056870"; exon\_number  
"7"; oId "CUFF.60340.4"; tss\_id "TSS43001";  
chr21 Cufflinks exon30968360 30969098 . + . gene\_id "XLOC\_034116"; transcript\_id "TCONS\_00056869"; exon\_number  
"1"; oId "CUFF.60340.1"; tss\_id "TSS43001";  
chr21 Cufflinks exon30969890 30970014 . + . gene\_id "XLOC\_034116"; transcript\_id "TCONS\_00056869"; exon\_number  
"2"; oId "CUFF.60340.1"; tss\_id "TSS43001";  
chr21 Cufflinks exon31003313 31003435 . + . gene\_id "XLOC\_034116"; transcript\_id "TCONS\_00056869"; exon\_number  
"3"; oId "CUFF.60340.1"; tss\_id "TSS43001";  
chr21 Cufflinks exon31009604 31009753 . + . gene\_id "XLOC\_034116"; transcript\_id "TCONS\_00056869"; exon\_number  
"4"; oId "CUFF.60340.1"; tss\_id "TSS43001";  
chr21 Cufflinks exon31022949 31023094 . + . gene\_id "XLOC\_034116"; transcript\_id "TCONS\_00056869"; exon\_number  
"5"; oId "CUFF.60340.1"; tss\_id "TSS43001";  
chr21 Cufflinks exon31024492 31025554 . + . gene\_id "XLOC\_034116"; transcript\_id "TCONS\_00056869"; exon\_number  
"6"; oId "CUFF.60340.1"; tss\_id "TSS43001";  
chr21 Cufflinks exon31026913 31030217 . + . gene\_id "XLOC\_034116"; transcript\_id "TCONS\_00056869"; exon\_number  
"7"; oId "CUFF.60340.1"; tss\_id "TSS43001";  
chr21 Cufflinks exon30968360 30969098 . + . gene\_id "XLOC\_034116"; transcript\_id "TCONS\_00056871"; exon\_number  
"1"; oId "CUFF.60340.5"; tss\_id "TSS43001";  
chr21 Cufflinks exon30969890 30970014 . + . gene\_id "XLOC\_034116"; transcript\_id "TCONS\_00056871"; exon\_number  
"2"; oId "CUFF.60340.5"; tss\_id "TSS43001";  
chr21 Cufflinks exon31121153 31121464 . + . gene\_id "XLOC\_034116"; transcript\_id "TCONS\_00056871"; exon\_number  
"3"; oId "CUFF.60340.5"; tss\_id "TSS43001";  
chr21 Cufflinks exon31131150 31131329 . + . gene\_id "XLOC\_034116"; transcript\_id "TCONS\_00056871"; exon\_number  
"4"; oId "CUFF.60340.5"; tss\_id "TSS43001";  
chr21 Cufflinks exon31132339 31133758 . + . gene\_id "XLOC\_034116"; transcript\_id "TCONS\_00056871"; exon\_number  
"5"; oId "CUFF.60340.5"; tss\_id "TSS43001";  
chr21 Cufflinks exon31120494 31120619 . + . gene\_id "XLOC\_034116"; transcript\_id "TCONS\_00056879"; exon\_number  
"1"; oId "CUFF.60340.6"; tss\_id "TSS43002";  
chr21 Cufflinks exon31121153 31121464 . + . gene\_id "XLOC\_034116"; transcript\_id "TCONS\_00056879"; exon\_number  
"2"; oId "CUFF.60340.6"; tss\_id "TSS43002";  
chr21 Cufflinks exon31131150 31131329 . + . gene\_id "XLOC\_034116"; transcript\_id "TCONS\_00056879"; exon\_number  
"3"; oId "CUFF.60340.6"; tss\_id "TSS43002";  
chr21 Cufflinks exon 31132339 31132384 . + . gene\_id "XLOC\_034116"; transcript\_id "TCONS\_00056879";  
exon\_number "4"; oId "CUFF.60340.6"; tss\_id "TSS43002";



|                 |      |                      |                    |   |   |   |                                                        |
|-----------------|------|----------------------|--------------------|---|---|---|--------------------------------------------------------|
| chr21 Cufflinks | exon | 31135897             | 31136325           | . | + | . | gene_id "XLOC_034116"; transcript_id "TCONS_00056879"; |
| exon_number     | "5"; | oId "CUFF.60340.6";  | tss_id "TSS43002"; |   |   |   |                                                        |
| chr21 Cufflinks | exon | 41934724             | 41934977           | . | + | . | gene_id "XLOC_034267"; transcript_id "TCONS_00057086"; |
| exon_number     | "1"; | oId "CUFF.60884.1";  | tss_id "TSS43174"; |   |   |   |                                                        |
| chr21 Cufflinks | exon | 41936567             | 41936625           | . | + | . | gene_id "XLOC_034267"; transcript_id "TCONS_00057086"; |
| exon_number     | "2"; | oId "CUFF.60884.1";  | tss_id "TSS43174"; |   |   |   |                                                        |
| chr21 Cufflinks | exon | 47351436             | 47352040           | . | + | . | gene_id "XLOC_034394"; transcript_id "TCONS_00057333"; |
| exon_number     | "1"; | oId "CUFF.61318.9";  | tss_id "TSS43341"; |   |   |   |                                                        |
| chr21 Cufflinks | exon | 47352489             | 47353496           | . | + | . | gene_id "XLOC_034394"; transcript_id "TCONS_00057333"; |
| exon_number     | "2"; | oId "CUFF.61318.9";  | tss_id "TSS43341"; |   |   |   |                                                        |
| chr21 Cufflinks | exon | 15313282             | 15313299           | . | - | . | gene_id "XLOC_034455"; transcript_id "TCONS_00057419"; |
| exon_number     | "1"; | oId "CUFF.59970.20"; | tss_id "TSS43420"; |   |   |   |                                                        |
| chr21 Cufflinks | exon | 15317360             | 15317430           | . | - | . | gene_id "XLOC_034455"; transcript_id "TCONS_00057419"; |
| exon_number     | "2"; | oId "CUFF.59970.20"; | tss_id "TSS43420"; |   |   |   |                                                        |
| chr21 Cufflinks | exon | 15323388             | 15323460           | . | - | . | gene_id "XLOC_034455"; transcript_id "TCONS_00057419"; |
| exon_number     | "3"; | oId "CUFF.59970.20"; | tss_id "TSS43420"; |   |   |   |                                                        |
| chr21 Cufflinks | exon | 15323553             | 15323581           | . | - | . | gene_id "XLOC_034455"; transcript_id "TCONS_00057419"; |
| exon_number     | "4"; | oId "CUFF.59970.20"; | tss_id "TSS43420"; |   |   |   |                                                        |
| chr21 Cufflinks | exon | 15326387             | 15326468           | . | - | . | gene_id "XLOC_034455"; transcript_id "TCONS_00057419"; |
| exon_number     | "5"; | oId "CUFF.59970.20"; | tss_id "TSS43420"; |   |   |   |                                                        |
| chr21 Cufflinks | exon | 15342294             | 15342431           | . | - | . | gene_id "XLOC_034455"; transcript_id "TCONS_00057419"; |
| exon_number     | "6"; | oId "CUFF.59970.20"; | tss_id "TSS43420"; |   |   |   |                                                        |
| chr21 Cufflinks | exon | 15344317             | 15344355           | . | - | . | gene_id "XLOC_034455"; transcript_id "TCONS_00057419"; |
| exon_number     | "7"; | oId "CUFF.59970.20"; | tss_id "TSS43420"; |   |   |   |                                                        |
| chr21 Cufflinks | exon | 39842700             | 39844003           | . | - | . | gene_id "XLOC_034629"; transcript_id "TCONS_00057694"; |
| exon_number     | "1"; | oId "CUFF.60761.11"; | tss_id "TSS43653"; |   |   |   |                                                        |
| chr21 Cufflinks | exon | 39845950             | 39846044           | . | - | . | gene_id "XLOC_034629"; transcript_id "TCONS_00057694"; |
| exon_number     | "2"; | oId "CUFF.60761.11"; | tss_id "TSS43653"; |   |   |   |                                                        |
| chr21 Cufflinks | exon | 39847299             | 39847666           | . | - | . | gene_id "XLOC_034629"; transcript_id "TCONS_00057694"; |
| exon_number     | "3"; | oId "CUFF.60761.11"; | tss_id "TSS43653"; |   |   |   |                                                        |
| chr21 Cufflinks | exon | 43629495             | 43630676           | . | - | . | gene_id "XLOC_034714"; transcript_id "TCONS_00057819"; |
| exon_number     | "1"; | oId "CUFF.60967.1";  | tss_id "TSS43767"; |   |   |   |                                                        |
| chr21 Cufflinks | exon | 43630895             | 43630984           | . | - | . | gene_id "XLOC_034714"; transcript_id "TCONS_00057819"; |
| exon_number     | "2"; | oId "CUFF.60967.1";  | tss_id "TSS43767"; |   |   |   |                                                        |
| chr21 Cufflinks | exon | 43640260             | 43640479           | . | - | . | gene_id "XLOC_034714"; transcript_id "TCONS_00057819"; |
| exon_number     | "3"; | oId "CUFF.60967.1";  | tss_id "TSS43767"; |   |   |   |                                                        |
| chr21 Cufflinks | exon | 44095039             | 44099702           | . | - | . | gene_id "XLOC_034727"; transcript_id "TCONS_00057836"; |
| exon_number     | "1"; | oId "CUFF.61005.3";  | tss_id "TSS43781"; |   |   |   |                                                        |
| chr21 Cufflinks | exon | 44100740             | 44104148           | . | - | . | gene_id "XLOC_034727"; transcript_id "TCONS_00057836"; |
| exon_number     | "2"; | oId "CUFF.61005.3";  | tss_id "TSS43781"; |   |   |   |                                                        |
| chr21 Cufflinks | exon | 44095039             | 44099132           | . | - | . | gene_id "XLOC_034727"; transcript_id "TCONS_00057834"; |
| exon_number     | "1"; | oId "CUFF.61005.1";  | tss_id "TSS43781"; |   |   |   |                                                        |
| chr21 Cufflinks | exon | 44100740             | 44104148           | . | - | . | gene_id "XLOC_034727"; transcript_id "TCONS_00057834"; |

|                                                         |     |                                                        |
|---------------------------------------------------------|-----|--------------------------------------------------------|
| exon_number "2"; oId "CUFF.61005.1"; tss_id "TSS43781"; | - . | gene_id "XLOC_034799"; transcript_id "TCONS_00057939"; |
| chr21 Cufflinks exon 46269500 46271542 .                |     |                                                        |
| exon_number "1"; oId "CUFF.61247.2"; tss_id "TSS43864"; | - . | gene_id "XLOC_034799"; transcript_id "TCONS_00057939"; |
| chr21 Cufflinks exon 46274792 46274898 .                |     |                                                        |
| exon_number "2"; oId "CUFF.61247.2"; tss_id "TSS43864"; | - . | gene_id "XLOC_034799"; transcript_id "TCONS_00057940"; |
| chr21 Cufflinks exon 46269500 46271542 .                |     |                                                        |
| exon_number "1"; oId "CUFF.61247.3"; tss_id "TSS43865"; | - . | gene_id "XLOC_034799"; transcript_id "TCONS_00057940"; |
| chr21 Cufflinks exon 46275125 46275171 .                |     |                                                        |
| exon_number "2"; oId "CUFF.61247.3"; tss_id "TSS43865"; | - . | gene_id "XLOC_034799"; transcript_id "TCONS_00057940"; |
| chr21 Cufflinks exon 46276108 46276279 .                |     |                                                        |
| exon_number "3"; oId "CUFF.61247.3"; tss_id "TSS43865"; | - . | gene_id "XLOC_034799"; transcript_id "TCONS_00057940"; |
| chr21 Cufflinks exon 46281078 46281186 .                |     |                                                        |
| exon_number "4"; oId "CUFF.61247.3"; tss_id "TSS43865"; | - . | gene_id "XLOC_034799"; transcript_id "TCONS_00057940"; |
| chr21 Cufflinks exon 46285310 46285362 .                |     |                                                        |
| exon_number "5"; oId "CUFF.61247.3"; tss_id "TSS43865"; | - . | gene_id "XLOC_034799"; transcript_id "TCONS_00057940"; |
| chr21 Cufflinks exon 46285486 46285557 .                |     |                                                        |
| exon_number "6"; oId "CUFF.61247.3"; tss_id "TSS43865"; | - . | gene_id "XLOC_034805"; transcript_id "TCONS_00057951"; |
| chr21 Cufflinks exon 46356173 46356724 .                |     |                                                        |
| exon_number "1"; oId "CUFF.61255.1"; tss_id "TSS43876"; | - . | gene_id "XLOC_034805"; transcript_id "TCONS_00057951"; |
| chr21 Cufflinks exon 46358359 46359462 .                |     |                                                        |
| exon_number "2"; oId "CUFF.61255.1"; tss_id "TSS43876"; | + . | gene_id "XLOC_034939"; transcript_id "TCONS_00058199"; |
| chr22 Cufflinks exon 22006246 22006620 .                |     |                                                        |
| exon_number "1"; oId "CUFF.61828.2"; tss_id "TSS44052"; | + . | gene_id "XLOC_034939"; transcript_id "TCONS_00058199"; |
| chr22 Cufflinks exon 22008302 22008712 .                |     |                                                        |
| exon_number "2"; oId "CUFF.61828.2"; tss_id "TSS44052"; | + . | gene_id "XLOC_034939"; transcript_id "TCONS_00058202"; |
| chr22 Cufflinks exon 22012752 22012975 .                |     |                                                        |
| exon_number "1"; oId "CUFF.61828.9"; tss_id "TSS44054"; | + . | gene_id "XLOC_034939"; transcript_id "TCONS_00058202"; |
| chr22 Cufflinks exon 22015126 22015312 .                |     |                                                        |
| exon_number "2"; oId "CUFF.61828.9"; tss_id "TSS44054"; | + . | gene_id "XLOC_034939"; transcript_id "TCONS_00058202"; |
| chr22 Cufflinks exon 22016180 22016660 .                |     |                                                        |
| exon_number "3"; oId "CUFF.61828.9"; tss_id "TSS44054"; | + . | gene_id "XLOC_035016"; transcript_id "TCONS_00058344"; |
| chr22 Cufflinks exon 24497882 24497912 .                |     |                                                        |
| exon_number "1"; oId "CUFF.62098.1"; tss_id "TSS44149"; | + . | gene_id "XLOC_035016"; transcript_id "TCONS_00058344"; |
| chr22 Cufflinks exon 24497961 24498502 .                |     |                                                        |
| exon_number "2"; oId "CUFF.62098.1"; tss_id "TSS44149"; | + . | gene_id "XLOC_035122"; transcript_id "TCONS_00058519"; |
| chr22 Cufflinks exon 29602561 29603358 .                |     |                                                        |
| exon_number "1"; oId "CUFF.62421.1"; tss_id "TSS44288"; | + . | gene_id "XLOC_035122"; transcript_id "TCONS_00058519"; |
| chr22 Cufflinks exon 29603953 29604091 .                |     |                                                        |
| exon_number "2"; oId "CUFF.62421.1"; tss_id "TSS44288"; | + . | gene_id "XLOC_035122"; transcript_id "TCONS_00058519"; |
| chr22 Cufflinks exon 29604527 29605183 .                |     |                                                        |
| exon_number "3"; oId "CUFF.62421.1"; tss_id "TSS44288"; | + . | gene_id "XLOC_035123"; transcript_id "TCONS_00058520"; |
| chr22 Cufflinks exon 29614664 29615145 .                |     |                                                        |
| exon_number "1"; oId "CUFF.62422.1"; tss_id "TSS44289"; |     |                                                        |

|                                                         |      |          |          |   |   |   |                                                        |
|---------------------------------------------------------|------|----------|----------|---|---|---|--------------------------------------------------------|
| chr22 Cufflinks                                         | exon | 29615414 | 29615555 | . | + | . | gene_id "XLOC_035123"; transcript_id "TCONS_00058520"; |
| exon_number "2"; oId "CUFF.62422.1"; tss_id "TSS44289"; |      |          |          |   |   |   |                                                        |
| chr22 Cufflinks                                         | exon | 31731335 | 31731402 | . | + | . | gene_id "XLOC_035160"; transcript_id "TCONS_00058596"; |
| exon_number "1"; oId "CUFF.62568.1"; tss_id "TSS44337"; |      |          |          |   |   |   |                                                        |
| chr22 Cufflinks                                         | exon | 31733654 | 31734007 | . | + | . | gene_id "XLOC_035160"; transcript_id "TCONS_00058596"; |
| exon_number "2"; oId "CUFF.62568.1"; tss_id "TSS44337"; |      |          |          |   |   |   |                                                        |
| chr22 Cufflinks                                         | exon | 39540645 | 39540876 | . | + | . | gene_id "XLOC_035271"; transcript_id "TCONS_00058780"; |
| exon_number "1"; oId "CUFF.63065.3"; tss_id "TSS44471"; |      |          |          |   |   |   |                                                        |
| chr22 Cufflinks                                         | exon | 39546481 | 39548321 | . | + | . | gene_id "XLOC_035271"; transcript_id "TCONS_00058780"; |
| exon_number "2"; oId "CUFF.63065.3"; tss_id "TSS44471"; |      |          |          |   |   |   |                                                        |
| chr22 Cufflinks                                         | exon | 41098866 | 41098890 | . | + | . | gene_id "XLOC_035298"; transcript_id "TCONS_00058827"; |
| exon_number "1"; oId "CUFF.63156.1"; tss_id "TSS44509"; |      |          |          |   |   |   |                                                        |
| chr22 Cufflinks                                         | exon | 41327040 | 41328823 | . | + | . | gene_id "XLOC_035298"; transcript_id "TCONS_00058827"; |
| exon_number "2"; oId "CUFF.63156.1"; tss_id "TSS44509"; |      |          |          |   |   |   |                                                        |
| chr22 Cufflinks                                         | exon | 46449726 | 46449800 | . | + | . | gene_id "XLOC_035379"; transcript_id "TCONS_00058990"; |
| exon_number "1"; oId "CUFF.63542.3"; tss_id "TSS44632"; |      |          |          |   |   |   |                                                        |
| chr22 Cufflinks                                         | exon | 46452727 | 46452825 | . | + | . | gene_id "XLOC_035379"; transcript_id "TCONS_00058990"; |
| exon_number "2"; oId "CUFF.63542.3"; tss_id "TSS44632"; |      |          |          |   |   |   |                                                        |
| chr22 Cufflinks                                         | exon | 46452942 | 46454402 | . | + | . | gene_id "XLOC_035379"; transcript_id "TCONS_00058990"; |
| exon_number "3"; oId "CUFF.63542.3"; tss_id "TSS44632"; |      |          |          |   |   |   |                                                        |
| chr22 Cufflinks                                         | exon | 47449754 | 47450278 | . | + | . | gene_id "XLOC_035414"; transcript_id "TCONS_00059053"; |
| exon_number "1"; oId "CUFF.63600.1"; tss_id "TSS44676"; |      |          |          |   |   |   |                                                        |
| chr22 Cufflinks                                         | exon | 47455843 | 47455907 | . | + | . | gene_id "XLOC_035414"; transcript_id "TCONS_00059053"; |
| exon_number "2"; oId "CUFF.63600.1"; tss_id "TSS44676"; |      |          |          |   |   |   |                                                        |
| chr22 Cufflinks                                         | exon | 20399449 | 20400817 | . | - | . | gene_id "XLOC_035583"; transcript_id "TCONS_00059315"; |
| exon_number "1"; oId "CUFF.61741.1"; tss_id "TSS44883"; |      |          |          |   |   |   |                                                        |
| chr22 Cufflinks                                         | exon | 20400848 | 20402335 | . | - | . | gene_id "XLOC_035583"; transcript_id "TCONS_00059315"; |
| exon_number "2"; oId "CUFF.61741.1"; tss_id "TSS44883"; |      |          |          |   |   |   |                                                        |
| chr22 Cufflinks                                         | exon | 23961849 | 23961876 | . | - | . | gene_id "XLOC_035667"; transcript_id "TCONS_00059454"; |
| exon_number "1"; oId "CUFF.62015.1"; tss_id "TSS44989"; |      |          |          |   |   |   |                                                        |
| chr22 Cufflinks                                         | exon | 23966162 | 23966503 | . | - | . | gene_id "XLOC_035667"; transcript_id "TCONS_00059454"; |
| exon_number "2"; oId "CUFF.62015.1"; tss_id "TSS44989"; |      |          |          |   |   |   |                                                        |
| chr22 Cufflinks                                         | exon | 29805058 | 29805646 | . | - | . | gene_id "XLOC_035751"; transcript_id "TCONS_00059585"; |
| exon_number "1"; oId "CUFF.62436.5"; tss_id "TSS45089"; |      |          |          |   |   |   |                                                        |
| chr22 Cufflinks                                         | exon | 29806964 | 29808500 | . | - | . | gene_id "XLOC_035751"; transcript_id "TCONS_00059585"; |
| exon_number "2"; oId "CUFF.62436.5"; tss_id "TSS45089"; |      |          |          |   |   |   |                                                        |
| chr22 Cufflinks                                         | exon | 29805058 | 29805646 | . | - | . | gene_id "XLOC_035751"; transcript_id "TCONS_00059584"; |
| exon_number "1"; oId "CUFF.62436.3"; tss_id "TSS45089"; |      |          |          |   |   |   |                                                        |
| chr22 Cufflinks                                         | exon | 29806945 | 29808500 | . | - | . | gene_id "XLOC_035751"; transcript_id "TCONS_00059584"; |
| exon_number "2"; oId "CUFF.62436.3"; tss_id "TSS45089"; |      |          |          |   |   |   |                                                        |
| chr22 Cufflinks                                         | exon | 38480896 | 38481382 | . | - | . | gene_id "XLOC_035897"; transcript_id "TCONS_00059829"; |
| exon_number "1"; oId "CUFF.62938.2"; tss_id "TSS45292"; |      |          |          |   |   |   |                                                        |
| chr22 Cufflinks                                         | exon | 38481693 | 38481739 | . | - | . | gene_id "XLOC_035897"; transcript_id "TCONS_00059829"; |

exon\_number "2"; oId "CUFF.62938.2"; tss\_id "TSS45292";  
chr22 Cufflinks exon 38482249 38482456 . - . gene\_id "XLOC\_035897"; transcript\_id "TCONS\_00059829";  
exon\_number "3"; oId "CUFF.62938.2"; tss\_id "TSS45292";  
chr22 Cufflinks exon 38482571 38482707 . - . gene\_id "XLOC\_035897"; transcript\_id "TCONS\_00059829";  
exon\_number "4"; oId "CUFF.62938.2"; tss\_id "TSS45292";  
chr22 Cufflinks exon 38965295 38965395 . - . gene\_id "XLOC\_035936"; transcript\_id "TCONS\_00059897";  
exon\_number "1"; oId "CUFF.63003.3"; tss\_id "TSS45346";  
chr22 Cufflinks exon 38966048 38966201 . - . gene\_id "XLOC\_035936"; transcript\_id "TCONS\_00059897";  
exon\_number "2"; oId "CUFF.63003.3"; tss\_id "TSS45346";  
chr22 Cufflinks exon 41770832 41771178 . - . gene\_id "XLOC\_035985"; transcript\_id "TCONS\_00059969";  
exon\_number "1"; oId "CUFF.63197.2"; tss\_id "TSS45403";  
chr22 Cufflinks exon 41776340 41777289 . - . gene\_id "XLOC\_035985"; transcript\_id "TCONS\_00059969";  
exon\_number "2"; oId "CUFF.63197.2"; tss\_id "TSS45403";  
chr22 Cufflinks exon 41770832 41771178 . - . gene\_id "XLOC\_035985"; transcript\_id "TCONS\_00059970";  
exon\_number "1"; oId "CUFF.63197.1"; tss\_id "TSS45404";  
chr22 Cufflinks exon 41777744 41777776 . - . gene\_id "XLOC\_035985"; transcript\_id "TCONS\_00059970";  
exon\_number "2"; oId "CUFF.63197.1"; tss\_id "TSS45404";  
chr22 Cufflinks exon 46557034 46557221 . - . gene\_id "XLOC\_036109"; transcript\_id "TCONS\_00060155";  
exon\_number "1"; oId "CUFF.63565.1"; tss\_id "TSS45559";  
chr22 Cufflinks exon 46563427 46563525 . - . gene\_id "XLOC\_036109"; transcript\_id "TCONS\_00060155";  
exon\_number "2"; oId "CUFF.63565.1"; tss\_id "TSS45559";  
chr22 Cufflinks exon 46568001 46568088 . - . gene\_id "XLOC\_036109"; transcript\_id "TCONS\_00060155";  
exon\_number "3"; oId "CUFF.63565.1"; tss\_id "TSS45559";  
chr22 Cufflinks exon 49806406 49810384 . - . gene\_id "XLOC\_036124"; transcript\_id "TCONS\_00060182";  
exon\_number "1"; oId "CUFF.63674.3"; tss\_id "TSS45582";  
chr22 Cufflinks exon 49810464 49810577 . - . gene\_id "XLOC\_036124"; transcript\_id "TCONS\_00060182";  
exon\_number "2"; oId "CUFF.63674.3"; tss\_id "TSS45582";  
chr22 Cufflinks exon 50050761 50051190 . - . gene\_id "XLOC\_036124"; transcript\_id "TCONS\_00060182";  
exon\_number "3"; oId "CUFF.63674.3"; tss\_id "TSS45582";  
chr22 Cufflinks exon 49806406 49810384 . - . gene\_id "XLOC\_036124"; transcript\_id "TCONS\_00060183";  
exon\_number "1"; oId "CUFF.63674.4"; tss\_id "TSS45582";  
chr22 Cufflinks exon 49810464 49810577 . - . gene\_id "XLOC\_036124"; transcript\_id "TCONS\_00060183";  
exon\_number "2"; oId "CUFF.63674.4"; tss\_id "TSS45582";  
chr22 Cufflinks exon 50051053 50051197 . - . gene\_id "XLOC\_036124"; transcript\_id "TCONS\_00060183";  
exon\_number "3"; oId "CUFF.63674.4"; tss\_id "TSS45582";  
chr22 Cufflinks exon 49806406 49809684 . - . gene\_id "XLOC\_036124"; transcript\_id "TCONS\_00060184";  
exon\_number "1"; oId "CUFF.63674.7"; tss\_id "TSS45582";  
chr22 Cufflinks exon 49810464 49810577 . - . gene\_id "XLOC\_036124"; transcript\_id "TCONS\_00060184";  
exon\_number "2"; oId "CUFF.63674.7"; tss\_id "TSS45582";  
chr22 Cufflinks exon 50051053 50051234 . - . gene\_id "XLOC\_036124"; transcript\_id "TCONS\_00060184";  
exon\_number "3"; oId "CUFF.63674.7"; tss\_id "TSS45582";  
chr22 Cufflinks exon 49806406 49809684 . - . gene\_id "XLOC\_036124"; transcript\_id "TCONS\_00060185";  
exon\_number "1"; oId "CUFF.63674.2"; tss\_id "TSS45583";

chr22 Cufflinks exon 49810464 49810577 . - . gene\_id "XLOC\_036124"; transcript\_id "TCONS\_00060185";  
exon\_number "2"; oId "CUFF.63674.2"; tss\_id "TSS45583";

chr22 Cufflinks exon 50050142 50051433 . - . gene\_id "XLOC\_036124"; transcript\_id "TCONS\_00060185";  
exon\_number "3"; oId "CUFF.63674.2"; tss\_id "TSS45583";

chr3 Cufflinks exon 5088405 5088423 . + . gene\_id "XLOC\_036227"; transcript\_id "TCONS\_00060351"; exon\_number "1"; oId  
"CUFF.63994.1"; tss\_id "TSS45711";

chr3 Cufflinks exon 5260065 5261650 . + . gene\_id "XLOC\_036227"; transcript\_id "TCONS\_00060351"; exon\_number "2"; oId  
"CUFF.63994.1"; tss\_id "TSS45711";

chr3 Cufflinks exon 17987644 17987727 . + . gene\_id "XLOC\_036377"; transcript\_id "TCONS\_00060597";  
exon\_number "1"; oId "CUFF.64543.2"; tss\_id "TSS45897";

chr3 Cufflinks exon 18055147 18055266 . + . gene\_id "XLOC\_036377"; transcript\_id "TCONS\_00060597";  
exon\_number "2"; oId "CUFF.64543.2"; tss\_id "TSS45897";

chr3 Cufflinks exon 18058110 18058203 . + . gene\_id "XLOC\_036377"; transcript\_id "TCONS\_00060597";  
exon\_number "3"; oId "CUFF.64543.2"; tss\_id "TSS45897";

chr3 Cufflinks exon 18082941 18083033 . + . gene\_id "XLOC\_036377"; transcript\_id "TCONS\_00060597";  
exon\_number "4"; oId "CUFF.64543.2"; tss\_id "TSS45897";

chr3 Cufflinks exon 18105424 18105554 . + . gene\_id "XLOC\_036377"; transcript\_id "TCONS\_00060597";  
exon\_number "5"; oId "CUFF.64543.2"; tss\_id "TSS45897";

chr3 Cufflinks exon 18289806 18289922 . + . gene\_id "XLOC\_036377"; transcript\_id "TCONS\_00060597";  
exon\_number "6"; oId "CUFF.64543.2"; tss\_id "TSS45897";

chr3 Cufflinks exon 18308510 18310998 . + . gene\_id "XLOC\_036377"; transcript\_id "TCONS\_00060597";  
exon\_number "7"; oId "CUFF.64543.2"; tss\_id "TSS45897";

chr3 Cufflinks exon 17987664 17987727 . + . gene\_id "XLOC\_036377"; transcript\_id "TCONS\_00060598";  
exon\_number "1"; oId "CUFF.64543.3"; tss\_id "TSS45897";

chr3 Cufflinks exon 18082941 18083035 . + . gene\_id "XLOC\_036377"; transcript\_id "TCONS\_00060598";  
exon\_number "2"; oId "CUFF.64543.3"; tss\_id "TSS45897";

chr3 Cufflinks exon 18105424 18105554 . + . gene\_id "XLOC\_036377"; transcript\_id "TCONS\_00060598";  
exon\_number "3"; oId "CUFF.64543.3"; tss\_id "TSS45897";

chr3 Cufflinks exon 18308510 18310998 . + . gene\_id "XLOC\_036377"; transcript\_id "TCONS\_00060598";  
exon\_number "4"; oId "CUFF.64543.3"; tss\_id "TSS45897";

chr3 Cufflinks exon 18020883 18021064 . + . gene\_id "XLOC\_036377"; transcript\_id "TCONS\_00060601";  
exon\_number "1"; oId "CUFF.64543.7"; tss\_id "TSS45899";

chr3 Cufflinks exon 18055147 18055266 . + . gene\_id "XLOC\_036377"; transcript\_id "TCONS\_00060601"; exon\_number "2";  
oId "CUFF.64543.7"; tss\_id "TSS45899";

chr3 Cufflinks exon 18058110 18058203 . + . gene\_id "XLOC\_036377"; transcript\_id "TCONS\_00060601"; exon\_number "3";  
oId "CUFF.64543.7"; tss\_id "TSS45899";

chr3 Cufflinks exon 18082941 18083033 . + . gene\_id "XLOC\_036377"; transcript\_id "TCONS\_00060601"; exon\_number "4";  
oId "CUFF.64543.7"; tss\_id "TSS45899";

chr3 Cufflinks exon 18308510 18310998 . + . gene\_id "XLOC\_036377"; transcript\_id "TCONS\_00060601"; exon\_number "5";  
oId "CUFF.64543.7"; tss\_id "TSS45899";

chr3 Cufflinks exon 18020943 18021064 . + . gene\_id "XLOC\_036377"; transcript\_id "TCONS\_00060602"; exon\_number "1";  
oId "CUFF.64543.9"; tss\_id "TSS45899";

chr3 Cufflinks exon 18055147 18055266 . + . gene\_id "XLOC\_036377"; transcript\_id "TCONS\_00060602"; exon\_number "2";



|                                         |          |   |   |   |                                                                         |
|-----------------------------------------|----------|---|---|---|-------------------------------------------------------------------------|
| chr3 Cufflinks exon18055147             | 18055266 | . | + | . | gene_id "XLOC_036377"; transcript_id "TCONS_00060605"; exon_number "2"; |
| oId "CUFF.64543.12"; tss_id "TSS45900"; |          |   |   |   |                                                                         |
| chr3 Cufflinks exon18058110             | 18058203 | . | + | . | gene_id "XLOC_036377"; transcript_id "TCONS_00060605"; exon_number "3"; |
| oId "CUFF.64543.12"; tss_id "TSS45900"; |          |   |   |   |                                                                         |
| chr3 Cufflinks exon18082941             | 18083033 | . | + | . | gene_id "XLOC_036377"; transcript_id "TCONS_00060605"; exon_number "4"; |
| oId "CUFF.64543.12"; tss_id "TSS45900"; |          |   |   |   |                                                                         |
| chr3 Cufflinks exon18090705             | 18090801 | . | + | . | gene_id "XLOC_036377"; transcript_id "TCONS_00060605"; exon_number "5"; |
| oId "CUFF.64543.12"; tss_id "TSS45900"; |          |   |   |   |                                                                         |
| chr3 Cufflinks exon18192458             | 18192594 | . | + | . | gene_id "XLOC_036377"; transcript_id "TCONS_00060605"; exon_number "6"; |
| oId "CUFF.64543.12"; tss_id "TSS45900"; |          |   |   |   |                                                                         |
| chr3 Cufflinks exon18021044             | 18021064 | . | + | . | gene_id "XLOC_036377"; transcript_id "TCONS_00060606"; exon_number "1"; |
| oId "CUFF.64543.13"; tss_id "TSS45900"; |          |   |   |   |                                                                         |
| chr3 Cufflinks exon18043669             | 18043830 | . | + | . | gene_id "XLOC_036377"; transcript_id "TCONS_00060606"; exon_number "2"; |
| oId "CUFF.64543.13"; tss_id "TSS45900"; |          |   |   |   |                                                                         |
| chr3 Cufflinks exon18058110             | 18058203 | . | + | . | gene_id "XLOC_036377"; transcript_id "TCONS_00060606"; exon_number "3"; |
| oId "CUFF.64543.13"; tss_id "TSS45900"; |          |   |   |   |                                                                         |
| chr3 Cufflinks exon18082941             | 18083033 | . | + | . | gene_id "XLOC_036377"; transcript_id "TCONS_00060606"; exon_number "4"; |
| oId "CUFF.64543.13"; tss_id "TSS45900"; |          |   |   |   |                                                                         |
| chr3 Cufflinks exon18105424             | 18105555 | . | + | . | gene_id "XLOC_036377"; transcript_id "TCONS_00060606"; exon_number "5"; |
| oId "CUFF.64543.13"; tss_id "TSS45900"; |          |   |   |   |                                                                         |
| chr3 Cufflinks exon18308510             | 18310998 | . | + | . | gene_id "XLOC_036377"; transcript_id "TCONS_00060606"; exon_number "6"; |
| oId "CUFF.64543.13"; tss_id "TSS45900"; |          |   |   |   |                                                                         |
| chr3 Cufflinks exon18031562             | 18031669 | . | + | . | gene_id "XLOC_036377"; transcript_id "TCONS_00060607"; exon_number "1"; |
| oId "CUFF.64543.14"; tss_id "TSS45901"; |          |   |   |   |                                                                         |
| chr3 Cufflinks exon18055147             | 18055266 | . | + | . | gene_id "XLOC_036377"; transcript_id "TCONS_00060607"; exon_number "2"; |
| oId "CUFF.64543.14"; tss_id "TSS45901"; |          |   |   |   |                                                                         |
| chr3 Cufflinks exon18082941             | 18083033 | . | + | . | gene_id "XLOC_036377"; transcript_id "TCONS_00060607"; exon_number "3"; |
| oId "CUFF.64543.14"; tss_id "TSS45901"; |          |   |   |   |                                                                         |
| chr3 Cufflinks exon18105424             | 18105554 | . | + | . | gene_id "XLOC_036377"; transcript_id "TCONS_00060607"; exon_number "4"; |
| oId "CUFF.64543.14"; tss_id "TSS45901"; |          |   |   |   |                                                                         |
| chr3 Cufflinks exon18306537             | 18306603 | . | + | . | gene_id "XLOC_036377"; transcript_id "TCONS_00060607"; exon_number "5"; |
| oId "CUFF.64543.14"; tss_id "TSS45901"; |          |   |   |   |                                                                         |
| chr3 Cufflinks exon18308510             | 18310998 | . | + | . | gene_id "XLOC_036377"; transcript_id "TCONS_00060607"; exon_number "6"; |
| oId "CUFF.64543.14"; tss_id "TSS45901"; |          |   |   |   |                                                                         |
| chr3 Cufflinks exon18113662             | 18113708 | . | + | . | gene_id "XLOC_036377"; transcript_id "TCONS_00060609"; exon_number "1"; |
| oId "CUFF.64543.15"; tss_id "TSS45902"; |          |   |   |   |                                                                         |
| chr3 Cufflinks exon18306537             | 18306603 | . | + | . | gene_id "XLOC_036377"; transcript_id "TCONS_00060609"; exon_number "2"; |
| oId "CUFF.64543.15"; tss_id "TSS45902"; |          |   |   |   |                                                                         |
| chr3 Cufflinks exon18308510             | 18310998 | . | + | . | gene_id "XLOC_036377"; transcript_id "TCONS_00060609"; exon_number "3"; |
| oId "CUFF.64543.15"; tss_id "TSS45902"; |          |   |   |   |                                                                         |
| chr3 Cufflinks exon23301247             | 23301270 | . | + | . | gene_id "XLOC_036423"; transcript_id "TCONS_00060663"; exon_number "1"; |
| oId "CUFF.64666.1"; tss_id "TSS45952";  |          |   |   |   |                                                                         |
| chr3 Cufflinks exon23304430             | 23304711 | . | + | . | gene_id "XLOC_036423"; transcript_id "TCONS_00060663"; exon_number "2"; |

|                                                                                |   |   |   |                                                                         |
|--------------------------------------------------------------------------------|---|---|---|-------------------------------------------------------------------------|
| oId "CUFF.64666.1"; tss_id "TSS45952";<br>chr3 Cufflinks exon23306626 23306645 | . | + | . | gene_id "XLOC_036423"; transcript_id "TCONS_00060663"; exon_number "3"; |
| oId "CUFF.64666.1"; tss_id "TSS45952";<br>chr3 Cufflinks exon28283100 28283303 | . | + | . | gene_id "XLOC_036462"; transcript_id "TCONS_00060716"; exon_number "1"; |
| oId "CUFF.64758.9"; tss_id "TSS45995";<br>chr3 Cufflinks exon28304782 28304871 | . | + | . | gene_id "XLOC_036462"; transcript_id "TCONS_00060716"; exon_number "2"; |
| oId "CUFF.64758.9"; tss_id "TSS45995";<br>chr3 Cufflinks exon28312437 28312483 | . | + | . | gene_id "XLOC_036462"; transcript_id "TCONS_00060716"; exon_number "3"; |
| oId "CUFF.64758.9"; tss_id "TSS45995";<br>chr3 Cufflinks exon42254863 42257013 | . | + | . | gene_id "XLOC_036599"; transcript_id "TCONS_00060934"; exon_number "1"; |
| oId "CUFF.65195.1"; tss_id "TSS46157";<br>chr3 Cufflinks exon42392667 42392676 | . | + | . | gene_id "XLOC_036599"; transcript_id "TCONS_00060934"; exon_number "2"; |
| oId "CUFF.65195.1"; tss_id "TSS46157";<br>chr3 Cufflinks exon44519202 44519701 | . | + | . | gene_id "XLOC_036619"; transcript_id "TCONS_00060975"; exon_number "1"; |
| oId "CUFF.65277.1"; tss_id "TSS46184";<br>chr3 Cufflinks exon44520074 44520161 | . | + | . | gene_id "XLOC_036619"; transcript_id "TCONS_00060975"; exon_number "2"; |
| oId "CUFF.65277.1"; tss_id "TSS46184";<br>chr3 Cufflinks exon44523102 44525057 | . | + | . | gene_id "XLOC_036619"; transcript_id "TCONS_00060975"; exon_number "3"; |
| oId "CUFF.65277.1"; tss_id "TSS46184";<br>chr3 Cufflinks exon49956509 49956519 | . | + | . | gene_id "XLOC_036706"; transcript_id "TCONS_00061119"; exon_number "1"; |
| oId "CUFF.65622.1"; tss_id "TSS46295";<br>chr3 Cufflinks exon50149753 50150265 | . | + | . | gene_id "XLOC_036706"; transcript_id "TCONS_00061119"; exon_number "2"; |
| oId "CUFF.65622.1"; tss_id "TSS46295";<br>chr3 Cufflinks exon51572682 51572931 | . | + | . | gene_id "XLOC_036738"; transcript_id "TCONS_00061181"; exon_number "1"; |
| oId "CUFF.65704.1"; tss_id "TSS46337";<br>chr3 Cufflinks exon51575514 51575545 | . | + | . | gene_id "XLOC_036738"; transcript_id "TCONS_00061181"; exon_number "2"; |
| oId "CUFF.65704.1"; tss_id "TSS46337";<br>chr3 Cufflinks exon51573308 51573587 | . | + | . | gene_id "XLOC_036739"; transcript_id "TCONS_00061187"; exon_number "1"; |
| oId "CUFF.65705.2"; tss_id "TSS46339";<br>chr3 Cufflinks exon51573827 51574078 | . | + | . | gene_id "XLOC_036739"; transcript_id "TCONS_00061187"; exon_number "2"; |
| oId "CUFF.65705.2"; tss_id "TSS46339";<br>chr3 Cufflinks exon59722002 59722249 | . | + | . | gene_id "XLOC_036834"; transcript_id "TCONS_00061337"; exon_number "1"; |
| oId "CUFF.65999.2"; tss_id "TSS46453";<br>chr3 Cufflinks exon59795458 59798153 | . | + | . | gene_id "XLOC_036834"; transcript_id "TCONS_00061337"; exon_number "2"; |
| oId "CUFF.65999.2"; tss_id "TSS46453";<br>chr3 Cufflinks exon59722002 59722249 | . | + | . | gene_id "XLOC_036834"; transcript_id "TCONS_00061336"; exon_number "1"; |
| oId "CUFF.65999.1"; tss_id "TSS46453";<br>chr3 Cufflinks exon59756474 59756688 | . | + | . | gene_id "XLOC_036834"; transcript_id "TCONS_00061336"; exon_number "2"; |
| oId "CUFF.65999.1"; tss_id "TSS46453";<br>chr3 Cufflinks exon59795458 59798153 | . | + | . | gene_id "XLOC_036834"; transcript_id "TCONS_00061336"; exon_number "3"; |
| oId "CUFF.65999.1"; tss_id "TSS46453";<br>chr3 Cufflinks exon63893803 63895522 | . | + | . | gene_id "XLOC_036858"; transcript_id "TCONS_00061370"; exon_number "1"; |
| oId "CUFF.66127.1"; tss_id "TSS46483";                                         | . |   |   |                                                                         |



|                                        |           |   |   |   |                                                                         |
|----------------------------------------|-----------|---|---|---|-------------------------------------------------------------------------|
| chr3 Cufflinks exon63895970            | 63896072  | . | + | . | gene_id "XLOC_036858"; transcript_id "TCONS_00061370"; exon_number "2"; |
| oId "CUFF.66127.1"; tss_id "TSS46483"; |           |   |   |   |                                                                         |
| chr3 Cufflinks exon127880193           | 127880596 | . | + | . | gene_id "XLOC_037204"; transcript_id "TCONS_00061896"; exon_number "1"; |
| oId "CUFF.67652.1"; tss_id "TSS46891"; |           |   |   |   |                                                                         |
| chr3 Cufflinks exon127880707           | 127880773 | . | + | . | gene_id "XLOC_037204"; transcript_id "TCONS_00061896"; exon_number "2"; |
| oId "CUFF.67652.1"; tss_id "TSS46891"; |           |   |   |   |                                                                         |
| chr3 Cufflinks exon127881078           | 127881682 | . | + | . | gene_id "XLOC_037204"; transcript_id "TCONS_00061896"; exon_number "3"; |
| oId "CUFF.67652.1"; tss_id "TSS46891"; |           |   |   |   |                                                                         |
| chr3 Cufflinks exon129231285           | 129231884 | . | + | . | gene_id "XLOC_037318"; transcript_id "TCONS_00062016"; exon_number "1"; |
| oId "CUFF.67844.1"; tss_id "TSS47006"; |           |   |   |   |                                                                         |
| chr3 Cufflinks exon129232359           | 129232574 | . | + | . | gene_id "XLOC_037318"; transcript_id "TCONS_00062016"; exon_number "2"; |
| oId "CUFF.67844.1"; tss_id "TSS47006"; |           |   |   |   |                                                                         |
| chr3 Cufflinks exon130573045           | 130573113 | . | + | . | gene_id "XLOC_037333"; transcript_id "TCONS_00062041"; exon_number "1"; |
| oId "CUFF.67919.1"; tss_id "TSS47027"; |           |   |   |   |                                                                         |
| chr3 Cufflinks exon130574725           | 130575105 | . | + | . | gene_id "XLOC_037333"; transcript_id "TCONS_00062041"; exon_number "2"; |
| oId "CUFF.67919.1"; tss_id "TSS47027"; |           |   |   |   |                                                                         |
| chr3 Cufflinks exon150141279           | 150141332 | . | + | . | gene_id "XLOC_037514"; transcript_id "TCONS_00062316"; exon_number "1"; |
| oId "CUFF.68547.1"; tss_id "TSS47237"; |           |   |   |   |                                                                         |
| chr3 Cufflinks exon150142419           | 150142450 | . | + | . | gene_id "XLOC_037514"; transcript_id "TCONS_00062316"; exon_number "2"; |
| oId "CUFF.68547.1"; tss_id "TSS47237"; |           |   |   |   |                                                                         |
| chr3 Cufflinks exon150143566           | 150143603 | . | + | . | gene_id "XLOC_037514"; transcript_id "TCONS_00062316"; exon_number "3"; |
| oId "CUFF.68547.1"; tss_id "TSS47237"; |           |   |   |   |                                                                         |
| chr3 Cufflinks exon150147916           | 150148619 | . | + | . | gene_id "XLOC_037514"; transcript_id "TCONS_00062316"; exon_number "4"; |
| oId "CUFF.68547.1"; tss_id "TSS47237"; |           |   |   |   |                                                                         |
| chr3 Cufflinks exon157000556           | 157000684 | . | + | . | gene_id "XLOC_037568"; transcript_id "TCONS_00062415"; exon_number "1"; |
| oId "CUFF.68737.7"; tss_id "TSS47308"; |           |   |   |   |                                                                         |
| chr3 Cufflinks exon157001013           | 157001645 | . | + | . | gene_id "XLOC_037568"; transcript_id "TCONS_00062415"; exon_number "2"; |
| oId "CUFF.68737.7"; tss_id "TSS47308"; |           |   |   |   |                                                                         |
| chr3 Cufflinks exon171757386           | 171757561 | . | + | . | gene_id "XLOC_037660"; transcript_id "TCONS_00062552"; exon_number "1"; |
| oId "CUFF.69069.1"; tss_id "TSS47426"; |           |   |   |   |                                                                         |
| chr3 Cufflinks exon171830242           | 171830380 | . | + | . | gene_id "XLOC_037660"; transcript_id "TCONS_00062552"; exon_number "2"; |
| oId "CUFF.69069.1"; tss_id "TSS47426"; |           |   |   |   |                                                                         |
| chr3 Cufflinks exon171851261           | 171851336 | . | + | . | gene_id "XLOC_037660"; transcript_id "TCONS_00062552"; exon_number "3"; |
| oId "CUFF.69069.1"; tss_id "TSS47426"; |           |   |   |   |                                                                         |
| chr3 Cufflinks exon171904502           | 171905031 | . | + | . | gene_id "XLOC_037660"; transcript_id "TCONS_00062552"; exon_number "4"; |
| oId "CUFF.69069.1"; tss_id "TSS47426"; |           |   |   |   |                                                                         |
| chr3 Cufflinks exon179674446           | 179674648 | . | + | . | gene_id "XLOC_037712"; transcript_id "TCONS_00062628"; exon_number "1"; |
| oId "CUFF.69237.4"; tss_id "TSS47490"; |           |   |   |   |                                                                         |
| chr3 Cufflinks exon179697349           | 179697473 | . | + | . | gene_id "XLOC_037712"; transcript_id "TCONS_00062628"; exon_number "2"; |
| oId "CUFF.69237.4"; tss_id "TSS47490"; |           |   |   |   |                                                                         |
| chr3 Cufflinks exon179697616           | 179697796 | . | + | . | gene_id "XLOC_037712"; transcript_id "TCONS_00062628"; exon_number "3"; |
| oId "CUFF.69237.4"; tss_id "TSS47490"; |           |   |   |   |                                                                         |
| chr3 Cufflinks exon182619789           | 182619812 | . | + | . | gene_id "XLOC_037730"; transcript_id "TCONS_00062666"; exon_number "1"; |

|                                        |   |   |   |                                                                         |  |
|----------------------------------------|---|---|---|-------------------------------------------------------------------------|--|
| oId "CUFF.69280.3"; tss_id "TSS47513"; |   |   |   |                                                                         |  |
| chr3 Cufflinks exon182631649 182631782 | . | + | . | gene_id "XLOC_037730"; transcript_id "TCONS_00062666"; exon_number "2"; |  |
| oId "CUFF.69280.3"; tss_id "TSS47513"; |   |   |   |                                                                         |  |
| chr3 Cufflinks exon182635811 182639421 | . | + | . | gene_id "XLOC_037730"; transcript_id "TCONS_00062666"; exon_number "3"; |  |
| oId "CUFF.69280.3"; tss_id "TSS47513"; |   |   |   |                                                                         |  |
| chr3 Cufflinks exon182629425 182629446 | . | + | . | gene_id "XLOC_037730"; transcript_id "TCONS_00062667"; exon_number "1"; |  |
| oId "CUFF.69280.4"; tss_id "TSS47514"; |   |   |   |                                                                         |  |
| chr3 Cufflinks exon182631649 182631782 | . | + | . | gene_id "XLOC_037730"; transcript_id "TCONS_00062667"; exon_number "2"; |  |
| oId "CUFF.69280.4"; tss_id "TSS47514"; |   |   |   |                                                                         |  |
| chr3 Cufflinks exon182635811 182639421 | . | + | . | gene_id "XLOC_037730"; transcript_id "TCONS_00062667"; exon_number "3"; |  |
| oId "CUFF.69280.4"; tss_id "TSS47514"; |   |   |   |                                                                         |  |
| chr3 Cufflinks exon194868600 194868834 | . | + | . | gene_id "XLOC_037867"; transcript_id "TCONS_00062881"; exon_number "1"; |  |
| oId "CUFF.69670.2"; tss_id "TSS47687"; |   |   |   |                                                                         |  |
| chr3 Cufflinks exon194872986 194873585 | . | + | . | gene_id "XLOC_037867"; transcript_id "TCONS_00062881"; exon_number "2"; |  |
| oId "CUFF.69670.2"; tss_id "TSS47687"; |   |   |   |                                                                         |  |
| chr3 Cufflinks exon194868600 194868834 | . | + | . | gene_id "XLOC_037867"; transcript_id "TCONS_00062880"; exon_number "1"; |  |
| oId "CUFF.69670.1"; tss_id "TSS47687"; |   |   |   |                                                                         |  |
| chr3 Cufflinks exon194872971 194873585 | . | + | . | gene_id "XLOC_037867"; transcript_id "TCONS_00062880"; exon_number "2"; |  |
| oId "CUFF.69670.1"; tss_id "TSS47687"; |   |   |   |                                                                         |  |
| chr3 Cufflinks exon195413895 195413926 | . | + | . | gene_id "XLOC_037881"; transcript_id "TCONS_00062904"; exon_number "1"; |  |
| oId "CUFF.69709.2"; tss_id "TSS47705"; |   |   |   |                                                                         |  |
| chr3 Cufflinks exon195414358 195414911 | . | + | . | gene_id "XLOC_037881"; transcript_id "TCONS_00062904"; exon_number "2"; |  |
| oId "CUFF.69709.2"; tss_id "TSS47705"; |   |   |   |                                                                         |  |
| chr3 Cufflinks exon196729777 196730077 | . | + | . | gene_id "XLOC_037917"; transcript_id "TCONS_00062949"; exon_number "1"; |  |
| oId "CUFF.69911.3"; tss_id "TSS47743"; |   |   |   |                                                                         |  |
| chr3 Cufflinks exon196730473 196730841 | . | + | . | gene_id "XLOC_037917"; transcript_id "TCONS_00062949"; exon_number "2"; |  |
| oId "CUFF.69911.3"; tss_id "TSS47743"; |   |   |   |                                                                         |  |
| chr3 Cufflinks exon196730968 196731230 | . | + | . | gene_id "XLOC_037917"; transcript_id "TCONS_00062949"; exon_number "3"; |  |
| oId "CUFF.69911.3"; tss_id "TSS47743"; |   |   |   |                                                                         |  |
| chr3 Cufflinks exon196731365 196731615 | . | + | . | gene_id "XLOC_037917"; transcript_id "TCONS_00062949"; exon_number "4"; |  |
| oId "CUFF.69911.3"; tss_id "TSS47743"; |   |   |   |                                                                         |  |
| chr3 Cufflinks exon196729777 196729844 | . | + | . | gene_id "XLOC_037917"; transcript_id "TCONS_00062948"; exon_number "1"; |  |
| oId "CUFF.69911.2"; tss_id "TSS47743"; |   |   |   |                                                                         |  |
| chr3 Cufflinks exon196730473 196730841 | . | + | . | gene_id "XLOC_037917"; transcript_id "TCONS_00062948"; exon_number "2"; |  |
| oId "CUFF.69911.2"; tss_id "TSS47743"; |   |   |   |                                                                         |  |
| chr3 Cufflinks exon196730968 196731230 | . | + | . | gene_id "XLOC_037917"; transcript_id "TCONS_00062948"; exon_number "3"; |  |
| oId "CUFF.69911.2"; tss_id "TSS47743"; |   |   |   |                                                                         |  |
| chr3 Cufflinks exon196731365 196731615 | . | + | . | gene_id "XLOC_037917"; transcript_id "TCONS_00062948"; exon_number "4"; |  |
| oId "CUFF.69911.2"; tss_id "TSS47743"; |   |   |   |                                                                         |  |
| chr3 Cufflinks exon196729777 196729844 | . | + | . | gene_id "XLOC_037917"; transcript_id "TCONS_00062947"; exon_number "1"; |  |
| oId "CUFF.69911.1"; tss_id "TSS47743"; |   |   |   |                                                                         |  |
| chr3 Cufflinks exon196730473 196730841 | . | + | . | gene_id "XLOC_037917"; transcript_id "TCONS_00062947"; exon_number "2"; |  |
| oId "CUFF.69911.1"; tss_id "TSS47743"; |   |   |   |                                                                         |  |

|                                        |           |   |   |   |                                                                         |
|----------------------------------------|-----------|---|---|---|-------------------------------------------------------------------------|
| chr3 Cufflinks exon196731365           | 196731615 | . | + | . | gene_id "XLOC_037917"; transcript_id "TCONS_00062947"; exon_number "3"; |
| oId "CUFF.69911.1"; tss_id "TSS47743"; |           |   |   |   |                                                                         |
| chr3 Cufflinks exon15567041            | 15567053  | . | - | . | gene_id "XLOC_038104"; transcript_id "TCONS_00063251"; exon_number "1"; |
| oId "CUFF.64448.1"; tss_id "TSS47982"; |           |   |   |   |                                                                         |
| chr3 Cufflinks exon15838717            | 15839473  | . | - | . | gene_id "XLOC_038104"; transcript_id "TCONS_00063251"; exon_number "2"; |
| oId "CUFF.64448.1"; tss_id "TSS47982"; |           |   |   |   |                                                                         |
| chr3 Cufflinks exon16298568            | 16302336  | . | - | . | gene_id "XLOC_038114"; transcript_id "TCONS_00063266"; exon_number "1"; |
| oId "CUFF.64484.4"; tss_id "TSS47997"; |           |   |   |   |                                                                         |
| chr3 Cufflinks exon16303740            | 16303838  | . | - | . | gene_id "XLOC_038114"; transcript_id "TCONS_00063266"; exon_number "2"; |
| oId "CUFF.64484.4"; tss_id "TSS47997"; |           |   |   |   |                                                                         |
| chr3 Cufflinks exon16298568            | 16302336  | . | - | . | gene_id "XLOC_038114"; transcript_id "TCONS_00063267"; exon_number "1"; |
| oId "CUFF.64484.3"; tss_id "TSS47998"; |           |   |   |   |                                                                         |
| chr3 Cufflinks exon16305662            | 16305736  | . | - | . | gene_id "XLOC_038114"; transcript_id "TCONS_00063267"; exon_number "2"; |
| oId "CUFF.64484.3"; tss_id "TSS47998"; |           |   |   |   |                                                                         |
| chr3 Cufflinks exon16306102            | 16306182  | . | - | . | gene_id "XLOC_038114"; transcript_id "TCONS_00063267"; exon_number "3"; |
| oId "CUFF.64484.3"; tss_id "TSS47998"; |           |   |   |   |                                                                         |
| chr3 Cufflinks exon18018164            | 18020233  | . | - | . | gene_id "XLOC_038132"; transcript_id "TCONS_00063297"; exon_number "1"; |
| oId "CUFF.64551.1"; tss_id "TSS48021"; |           |   |   |   |                                                                         |
| chr3 Cufflinks exon18022591            | 18023022  | . | - | . | gene_id "XLOC_038132"; transcript_id "TCONS_00063297"; exon_number "2"; |
| oId "CUFF.64551.1"; tss_id "TSS48021"; |           |   |   |   |                                                                         |
| chr3 Cufflinks exon44983842            | 44983975  | . | - | . | gene_id "XLOC_038283"; transcript_id "TCONS_00063598"; exon_number "1"; |
| oId "CUFF.65337.1"; tss_id "TSS48221"; |           |   |   |   |                                                                         |
| chr3 Cufflinks exon44984287            | 44984386  | . | - | . | gene_id "XLOC_038283"; transcript_id "TCONS_00063598"; exon_number "2"; |
| oId "CUFF.65337.1"; tss_id "TSS48221"; |           |   |   |   |                                                                         |
| chr3 Cufflinks exon44984786            | 44984992  | . | - | . | gene_id "XLOC_038283"; transcript_id "TCONS_00063598"; exon_number "3"; |
| oId "CUFF.65337.1"; tss_id "TSS48221"; |           |   |   |   |                                                                         |
| chr3 Cufflinks exon48555102            | 48557239  | . | - | . | gene_id "XLOC_038338"; transcript_id "TCONS_00063701"; exon_number "1"; |
| oId "CUFF.65504.1"; tss_id "TSS48298"; |           |   |   |   |                                                                         |
| chr3 Cufflinks exon48558548            | 48558656  | . | - | . | gene_id "XLOC_038338"; transcript_id "TCONS_00063701"; exon_number "2"; |
| oId "CUFF.65504.1"; tss_id "TSS48298"; |           |   |   |   |                                                                         |
| chr3 Cufflinks exon60685869            | 60685885  | . | - | . | gene_id "XLOC_038555"; transcript_id "TCONS_00064087"; exon_number "1"; |
| oId "CUFF.66073.1"; tss_id "TSS48584"; |           |   |   |   |                                                                         |
| chr3 Cufflinks exon60807642            | 60807705  | . | - | . | gene_id "XLOC_038555"; transcript_id "TCONS_00064087"; exon_number "2"; |
| oId "CUFF.66073.1"; tss_id "TSS48584"; |           |   |   |   |                                                                         |
| chr3 Cufflinks exon61027719            | 61027771  | . | - | . | gene_id "XLOC_038555"; transcript_id "TCONS_00064087"; exon_number "3"; |
| oId "CUFF.66073.1"; tss_id "TSS48584"; |           |   |   |   |                                                                         |
| chr3 Cufflinks exon61186291            | 61186339  | . | - | . | gene_id "XLOC_038555"; transcript_id "TCONS_00064087"; exon_number "4"; |
| oId "CUFF.66073.1"; tss_id "TSS48584"; |           |   |   |   |                                                                         |
| chr3 Cufflinks exon61236975            | 61237133  | . | - | . | gene_id "XLOC_038555"; transcript_id "TCONS_00064087"; exon_number "5"; |
| oId "CUFF.66073.1"; tss_id "TSS48584"; |           |   |   |   |                                                                         |
| chr3 Cufflinks exon60763732            | 60763759  | . | - | . | gene_id "XLOC_038555"; transcript_id "TCONS_00064088"; exon_number "1"; |
| oId "CUFF.66073.2"; tss_id "TSS48584"; |           |   |   |   |                                                                         |
| chr3 Cufflinks exon60807613            | 60807705  | . | - | . | gene_id "XLOC_038555"; transcript_id "TCONS_00064088"; exon_number "2"; |

|                                                                                   |   |   |   |                                                                         |
|-----------------------------------------------------------------------------------|---|---|---|-------------------------------------------------------------------------|
| oId "CUFF.66073.2"; tss_id "TSS48584";<br>chr3 Cufflinks exon61027719 61027771    | . | - | . | gene_id "XLOC_038555"; transcript_id "TCONS_00064088"; exon_number "3"; |
| oId "CUFF.66073.2"; tss_id "TSS48584";<br>chr3 Cufflinks exon61186291 61186339    | . | - | . | gene_id "XLOC_038555"; transcript_id "TCONS_00064088"; exon_number "4"; |
| oId "CUFF.66073.2"; tss_id "TSS48584";<br>chr3 Cufflinks exon61236975 61237133    | . | - | . | gene_id "XLOC_038555"; transcript_id "TCONS_00064088"; exon_number "5"; |
| oId "CUFF.66073.2"; tss_id "TSS48584";<br>chr3 Cufflinks exon71234003 71234076    | . | - | . | gene_id "XLOC_038591"; transcript_id "TCONS_00064173"; exon_number "1"; |
| oId "CUFF.66202.1"; tss_id "TSS48643";<br>chr3 Cufflinks exon71242899 71243224    | . | - | . | gene_id "XLOC_038591"; transcript_id "TCONS_00064173"; exon_number "2"; |
| oId "CUFF.66202.1"; tss_id "TSS48643";<br>chr3 Cufflinks exon98219331 98220364    | . | - | . | gene_id "XLOC_038670"; transcript_id "TCONS_00064289"; exon_number "1"; |
| oId "CUFF.66501.1"; tss_id "TSS48734";<br>chr3 Cufflinks exon98223312 98223388    | . | - | . | gene_id "XLOC_038670"; transcript_id "TCONS_00064289"; exon_number "2"; |
| oId "CUFF.66501.1"; tss_id "TSS48734";<br>chr3 Cufflinks exon98223718 98231733    | . | - | . | gene_id "XLOC_038670"; transcript_id "TCONS_00064289"; exon_number "3"; |
| oId "CUFF.66501.1"; tss_id "TSS48734";<br>chr3 Cufflinks exon114864388 114865716  | . | - | . | gene_id "XLOC_038769"; transcript_id "TCONS_00064509"; exon_number "1"; |
| oId "CUFF.66979.13"; tss_id "TSS48854";<br>chr3 Cufflinks exon114866066 114866127 | . | - | . | gene_id "XLOC_038769"; transcript_id "TCONS_00064509"; exon_number "2"; |
| oId "CUFF.66979.13"; tss_id "TSS48854";<br>chr3 Cufflinks exon117447857 117448026 | . | - | . | gene_id "XLOC_038906"; transcript_id "TCONS_00064618"; exon_number "1"; |
| oId "CUFF.67174.1"; tss_id "TSS48992";<br>chr3 Cufflinks exon117716029 117716419  | . | - | . | gene_id "XLOC_038906"; transcript_id "TCONS_00064618"; exon_number "2"; |
| oId "CUFF.67174.1"; tss_id "TSS48992";<br>chr3 Cufflinks exon117575288 117576176  | . | - | . | gene_id "XLOC_038906"; transcript_id "TCONS_00064629"; exon_number "1"; |
| oId "CUFF.67174.2"; tss_id "TSS48992";<br>chr3 Cufflinks exon117716029 117716419  | . | - | . | gene_id "XLOC_038906"; transcript_id "TCONS_00064629"; exon_number "2"; |
| oId "CUFF.67174.2"; tss_id "TSS48992";<br>chr3 Cufflinks exon120043318 120046170  | . | - | . | gene_id "XLOC_038988"; transcript_id "TCONS_00064733"; exon_number "1"; |
| oId "CUFF.67309.7"; tss_id "TSS49082";<br>chr3 Cufflinks exon120258381 120258400  | . | - | . | gene_id "XLOC_038988"; transcript_id "TCONS_00064733"; exon_number "2"; |
| oId "CUFF.67309.7"; tss_id "TSS49082";<br>chr3 Cufflinks exon123210665 123212035  | . | - | . | gene_id "XLOC_039023"; transcript_id "TCONS_00064794"; exon_number "1"; |
| oId "CUFF.67443.2"; tss_id "TSS49127";<br>chr3 Cufflinks exon123489004 123489029  | . | - | . | gene_id "XLOC_039023"; transcript_id "TCONS_00064794"; exon_number "2"; |
| oId "CUFF.67443.2"; tss_id "TSS49127";<br>chr3 Cufflinks exon129104186 129107740  | . | - | . | gene_id "XLOC_039103"; transcript_id "TCONS_00064975"; exon_number "1"; |
| oId "CUFF.67834.7"; tss_id "TSS49256";<br>chr3 Cufflinks exon129108743 129108939  | . | - | . | gene_id "XLOC_039103"; transcript_id "TCONS_00064975"; exon_number "2"; |
| oId "CUFF.67834.7"; tss_id "TSS49256";<br>chr3 Cufflinks exon129112011 129112477  | . | - | . | gene_id "XLOC_039103"; transcript_id "TCONS_00064975"; exon_number "3"; |
| oId "CUFF.67834.7"; tss_id "TSS49256";                                            |   |   |   |                                                                         |

|                                         |           |   |   |   |                                                                         |
|-----------------------------------------|-----------|---|---|---|-------------------------------------------------------------------------|
| chr3 Cufflinks exon133052285            | 133053506 | . | - | . | gene_id "XLOC_039152"; transcript_id "TCONS_00065068"; exon_number "1"; |
| oId "CUFF.67993.1"; tss_id "TSS49324";  |           |   |   |   |                                                                         |
| chr3 Cufflinks exon133054010            | 133054105 | . | - | . | gene_id "XLOC_039152"; transcript_id "TCONS_00065068"; exon_number "2"; |
| oId "CUFF.67993.1"; tss_id "TSS49324";  |           |   |   |   |                                                                         |
| chr3 Cufflinks exon133054620            | 133054695 | . | - | . | gene_id "XLOC_039152"; transcript_id "TCONS_00065068"; exon_number "3"; |
| oId "CUFF.67993.1"; tss_id "TSS49324";  |           |   |   |   |                                                                         |
| chr3 Cufflinks exon133052285            | 133052955 | . | - | . | gene_id "XLOC_039152"; transcript_id "TCONS_00065069"; exon_number "1"; |
| oId "CUFF.67993.2"; tss_id "TSS49324";  |           |   |   |   |                                                                         |
| chr3 Cufflinks exon133053213            | 133053506 | . | - | . | gene_id "XLOC_039152"; transcript_id "TCONS_00065069"; exon_number "2"; |
| oId "CUFF.67993.2"; tss_id "TSS49324";  |           |   |   |   |                                                                         |
| chr3 Cufflinks exon133054620            | 133054703 | . | - | . | gene_id "XLOC_039152"; transcript_id "TCONS_00065069"; exon_number "3"; |
| oId "CUFF.67993.2"; tss_id "TSS49324";  |           |   |   |   |                                                                         |
| chr3 Cufflinks exon137780827            | 137781819 | . | - | . | gene_id "XLOC_039211"; transcript_id "TCONS_00065162"; exon_number "1"; |
| oId "CUFF.68169.2"; tss_id "TSS49400";  |           |   |   |   |                                                                         |
| chr3 Cufflinks exon137783470            | 137783609 | . | - | . | gene_id "XLOC_039211"; transcript_id "TCONS_00065162"; exon_number "2"; |
| oId "CUFF.68169.2"; tss_id "TSS49400";  |           |   |   |   |                                                                         |
| chr3 Cufflinks exon137784821            | 137784850 | . | - | . | gene_id "XLOC_039211"; transcript_id "TCONS_00065162"; exon_number "3"; |
| oId "CUFF.68169.2"; tss_id "TSS49400";  |           |   |   |   |                                                                         |
| chr3 Cufflinks exon142984064            | 142985771 | . | - | . | gene_id "XLOC_039266"; transcript_id "TCONS_00065262"; exon_number "1"; |
| oId "CUFF.68382.1"; tss_id "TSS49474";  |           |   |   |   |                                                                         |
| chr3 Cufflinks exon142987717            | 142987831 | . | - | . | gene_id "XLOC_039266"; transcript_id "TCONS_00065262"; exon_number "2"; |
| oId "CUFF.68382.1"; tss_id "TSS49474";  |           |   |   |   |                                                                         |
| chr3 Cufflinks exon143082219            | 143082242 | . | - | . | gene_id "XLOC_039266"; transcript_id "TCONS_00065262"; exon_number "3"; |
| oId "CUFF.68382.1"; tss_id "TSS49474";  |           |   |   |   |                                                                         |
| chr3 Cufflinks exon179704237            | 179704304 | . | - | . | gene_id "XLOC_039482"; transcript_id "TCONS_00065596"; exon_number "1"; |
| oId "CUFF.69238.1"; tss_id "TSS49742";  |           |   |   |   |                                                                         |
| chr3 Cufflinks exon179706174            | 179706575 | . | - | . | gene_id "XLOC_039482"; transcript_id "TCONS_00065596"; exon_number "2"; |
| oId "CUFF.69238.1"; tss_id "TSS49742";  |           |   |   |   |                                                                         |
| chr3 Cufflinks exon194123403            | 194126299 | . | - | . | gene_id "XLOC_039587"; transcript_id "TCONS_00065781"; exon_number "1"; |
| oId "CUFF.69630.2"; tss_id "TSS49883";  |           |   |   |   |                                                                         |
| chr3 Cufflinks exon194129086            | 194129107 | . | - | . | gene_id "XLOC_039587"; transcript_id "TCONS_00065781"; exon_number "2"; |
| oId "CUFF.69630.2"; tss_id "TSS49883";  |           |   |   |   |                                                                         |
| chr3 Cufflinks exon195256703            | 195256709 | . | - | . | gene_id "XLOC_039599"; transcript_id "TCONS_00065807"; exon_number "1"; |
| oId "CUFF.69676.2"; tss_id "TSS49902";  |           |   |   |   |                                                                         |
| chr3 Cufflinks exon195269734            | 195270224 | . | - | . | gene_id "XLOC_039599"; transcript_id "TCONS_00065807"; exon_number "2"; |
| oId "CUFF.69676.2"; tss_id "TSS49902";  |           |   |   |   |                                                                         |
| chr3 Cufflinks exon195620581            | 195621234 | . | - | . | gene_id "XLOC_039605"; transcript_id "TCONS_00065829"; exon_number "1"; |
| oId "CUFF.69735.10"; tss_id "TSS49911"; |           |   |   |   |                                                                         |
| chr3 Cufflinks exon195622766            | 195622785 | . | - | . | gene_id "XLOC_039605"; transcript_id "TCONS_00065829"; exon_number "2"; |
| oId "CUFF.69735.10"; tss_id "TSS49911"; |           |   |   |   |                                                                         |
| chr3 Cufflinks exon195622928            | 195623168 | . | - | . | gene_id "XLOC_039609"; transcript_id "TCONS_00065831"; exon_number "1"; |
| oId "CUFF.69739.1"; tss_id "TSS49918";  |           |   |   |   |                                                                         |
| chr3 Cufflinks exon195624038            | 195624056 | . | - | . | gene_id "XLOC_039609"; transcript_id "TCONS_00065831"; exon_number "2"; |

oId "CUFF.69739.1"; tss\_id "TSS49918";  
chr3 Cufflinks exon197330592 197335119 . - . gene\_id "XLOC\_039689"; transcript\_id "TCONS\_00065976"; exon\_number "1";  
oId "CUFF.69981.2"; tss\_id "TSS50023";  
chr3 Cufflinks exon197335671 197335919 . - . gene\_id "XLOC\_039689"; transcript\_id "TCONS\_00065976"; exon\_number "2";  
oId "CUFF.69981.2"; tss\_id "TSS50023";  
chr4 Cufflinks exon77811960 77811982 . + . gene\_id "XLOC\_040331"; transcript\_id "TCONS\_00066940"; exon\_number "1";  
oId "CUFF.72335.1"; tss\_id "TSS50778";  
chr4 Cufflinks exon77958419 77959768 . + . gene\_id "XLOC\_040331"; transcript\_id "TCONS\_00066940"; exon\_number "2";  
oId "CUFF.72335.1"; tss\_id "TSS50778";  
chr4 Cufflinks exon111544495 111544611 . + . gene\_id "XLOC\_040551"; transcript\_id "TCONS\_00067313"; exon\_number "1";  
oId "CUFF.73250.1"; tss\_id "TSS51060";  
chr4 Cufflinks exon111544763 111544885 . + . gene\_id "XLOC\_040551"; transcript\_id "TCONS\_00067313"; exon\_number "2";  
oId "CUFF.73250.1"; tss\_id "TSS51060";  
chr4 Cufflinks exon6176035 6176322 . - . gene\_id "XLOC\_041095"; transcript\_id "TCONS\_00068226"; exon\_number "1"; oId  
"CUFF.70461.1"; tss\_id "TSS51751";  
chr4 Cufflinks exon6176868 6177475 . - . gene\_id "XLOC\_041095"; transcript\_id "TCONS\_00068226"; exon\_number "2"; oId  
"CUFF.70461.1"; tss\_id "TSS51751";  
chr4 Cufflinks exon6178798 6179098 . - . gene\_id "XLOC\_041095"; transcript\_id "TCONS\_00068226"; exon\_number "3"; oId  
"CUFF.70461.1"; tss\_id "TSS51751";  
chr4 Cufflinks exon13570366 13571752 . - . gene\_id "XLOC\_041247"; transcript\_id "TCONS\_00068419"; exon\_number "1";  
oId "CUFF.71030.1"; tss\_id "TSS51919";  
chr4 Cufflinks exon13574326 13574466 . - . gene\_id "XLOC\_041247"; transcript\_id "TCONS\_00068419"; exon\_number "2";  
oId "CUFF.71030.1"; tss\_id "TSS51919";  
chr4 Cufflinks exon13578462 13578615 . - . gene\_id "XLOC\_041247"; transcript\_id "TCONS\_00068419"; exon\_number "3";  
oId "CUFF.71030.1"; tss\_id "TSS51919";  
chr4 Cufflinks exon13579027 13579111 . - . gene\_id "XLOC\_041247"; transcript\_id "TCONS\_00068419"; exon\_number "4";  
oId "CUFF.71030.1"; tss\_id "TSS51919";  
chr4 Cufflinks exon13579206 13579255 . - . gene\_id "XLOC\_041247"; transcript\_id "TCONS\_00068419"; exon\_number "5";  
oId "CUFF.71030.1"; tss\_id "TSS51919";  
chr4 Cufflinks exon13579413 13579482 . - . gene\_id "XLOC\_041247"; transcript\_id "TCONS\_00068419"; exon\_number "6";  
oId "CUFF.71030.1"; tss\_id "TSS51919";  
chr4 Cufflinks exon83814605 83816000 . - . gene\_id "XLOC\_041575"; transcript\_id "TCONS\_00068979"; exon\_number "1";  
oId "CUFF.72509.2"; tss\_id "TSS52339";  
chr4 Cufflinks exon83816845 83816927 . - . gene\_id "XLOC\_041575"; transcript\_id "TCONS\_00068979"; exon\_number "2";  
oId "CUFF.72509.2"; tss\_id "TSS52339";  
chr4 Cufflinks exon83819142 83819215 . - . gene\_id "XLOC\_041575"; transcript\_id "TCONS\_00068979"; exon\_number "3";  
oId "CUFF.72509.2"; tss\_id "TSS52339";  
chr4 Cufflinks exon83821230 83821376 . - . gene\_id "XLOC\_041575"; transcript\_id "TCONS\_00068979"; exon\_number "4";  
oId "CUFF.72509.2"; tss\_id "TSS52339";  
chr4 Cufflinks exon83821487 83822069 . - . gene\_id "XLOC\_041575"; transcript\_id "TCONS\_00068979"; exon\_number "5";  
oId "CUFF.72509.2"; tss\_id "TSS52339";  
chr4 Cufflinks exon103552643 103553438 . - . gene\_id "XLOC\_041677"; transcript\_id "TCONS\_00069168"; exon\_number "1";  
oId "CUFF.72894.6"; tss\_id "TSS52473";

|                                        |           |   |   |   |                                                                         |
|----------------------------------------|-----------|---|---|---|-------------------------------------------------------------------------|
| chr4 Cufflinks exon103554408           | 103554511 | . | - | . | gene_id "XLOC_041677"; transcript_id "TCONS_00069168"; exon_number "2"; |
| oId "CUFF.72894.6"; tss_id "TSS52473"; |           |   |   |   |                                                                         |
| chr4 Cufflinks exon106603785           | 106604474 | . | - | . | gene_id "XLOC_041724"; transcript_id "TCONS_00069243"; exon_number "1"; |
| oId "CUFF.73032.3"; tss_id "TSS52533"; |           |   |   |   |                                                                         |
| chr4 Cufflinks exon106607849           | 106607995 | . | - | . | gene_id "XLOC_041724"; transcript_id "TCONS_00069243"; exon_number "2"; |
| oId "CUFF.73032.3"; tss_id "TSS52533"; |           |   |   |   |                                                                         |
| chr4 Cufflinks exon106610629           | 106610656 | . | - | . | gene_id "XLOC_041724"; transcript_id "TCONS_00069243"; exon_number "3"; |
| oId "CUFF.73032.3"; tss_id "TSS52533"; |           |   |   |   |                                                                         |
| chr4 Cufflinks exon123645479           | 123645540 | . | - | . | gene_id "XLOC_041885"; transcript_id "TCONS_00069485"; exon_number "1"; |
| oId "CUFF.73629.1"; tss_id "TSS52728"; |           |   |   |   |                                                                         |
| chr4 Cufflinks exon123646033           | 123646084 | . | - | . | gene_id "XLOC_041885"; transcript_id "TCONS_00069485"; exon_number "2"; |
| oId "CUFF.73629.1"; tss_id "TSS52728"; |           |   |   |   |                                                                         |
| chr4 Cufflinks exon123648210           | 123648243 | . | - | . | gene_id "XLOC_041885"; transcript_id "TCONS_00069485"; exon_number "3"; |
| oId "CUFF.73629.1"; tss_id "TSS52728"; |           |   |   |   |                                                                         |
| chr4 Cufflinks exon123651201           | 123651790 | . | - | . | gene_id "XLOC_041885"; transcript_id "TCONS_00069485"; exon_number "4"; |
| oId "CUFF.73629.1"; tss_id "TSS52728"; |           |   |   |   |                                                                         |
| chr4 Cufflinks exon123653207           | 123653348 | . | - | . | gene_id "XLOC_041885"; transcript_id "TCONS_00069485"; exon_number "5"; |
| oId "CUFF.73629.1"; tss_id "TSS52728"; |           |   |   |   |                                                                         |
| chr4 Cufflinks exon123653442           | 123653616 | . | - | . | gene_id "XLOC_041885"; transcript_id "TCONS_00069485"; exon_number "6"; |
| oId "CUFF.73629.1"; tss_id "TSS52728"; |           |   |   |   |                                                                         |
| chr4 Cufflinks exon123652239           | 123652838 | . | - | . | gene_id "XLOC_041885"; transcript_id "TCONS_00069489"; exon_number "1"; |
| oId "CUFF.73629.5"; tss_id "TSS52728"; |           |   |   |   |                                                                         |
| chr4 Cufflinks exon123653207           | 123653348 | . | - | . | gene_id "XLOC_041885"; transcript_id "TCONS_00069489"; exon_number "2"; |
| oId "CUFF.73629.5"; tss_id "TSS52728"; |           |   |   |   |                                                                         |
| chr4 Cufflinks exon123653574           | 123653613 | . | - | . | gene_id "XLOC_041885"; transcript_id "TCONS_00069489"; exon_number "3"; |
| oId "CUFF.73629.5"; tss_id "TSS52728"; |           |   |   |   |                                                                         |
| chr4 Cufflinks exon129190392           | 129192568 | . | - | . | gene_id "XLOC_041902"; transcript_id "TCONS_00069512"; exon_number "1"; |
| oId "CUFF.73742.1"; tss_id "TSS52748"; |           |   |   |   |                                                                         |
| chr4 Cufflinks exon129193517           | 129193672 | . | - | . | gene_id "XLOC_041902"; transcript_id "TCONS_00069512"; exon_number "2"; |
| oId "CUFF.73742.1"; tss_id "TSS52748"; |           |   |   |   |                                                                         |
| chr4 Cufflinks exon129207871           | 129207934 | . | - | . | gene_id "XLOC_041902"; transcript_id "TCONS_00069512"; exon_number "3"; |
| oId "CUFF.73742.1"; tss_id "TSS52748"; |           |   |   |   |                                                                         |
| chr4 Cufflinks exon129190392           | 129192568 | . | - | . | gene_id "XLOC_041902"; transcript_id "TCONS_00069513"; exon_number "1"; |
| oId "CUFF.73742.3"; tss_id "TSS52749"; |           |   |   |   |                                                                         |
| chr4 Cufflinks exon129193517           | 129193672 | . | - | . | gene_id "XLOC_041902"; transcript_id "TCONS_00069513"; exon_number "2"; |
| oId "CUFF.73742.3"; tss_id "TSS52749"; |           |   |   |   |                                                                         |
| chr4 Cufflinks exon129208446           | 129208495 | . | - | . | gene_id "XLOC_041902"; transcript_id "TCONS_00069513"; exon_number "3"; |
| oId "CUFF.73742.3"; tss_id "TSS52749"; |           |   |   |   |                                                                         |
| chr4 Cufflinks exon154297439           | 154299230 | . | - | . | gene_id "XLOC_042045"; transcript_id "TCONS_00069751"; exon_number "1"; |
| oId "CUFF.74303.1"; tss_id "TSS52934"; |           |   |   |   |                                                                         |
| chr4 Cufflinks exon154308652           | 154308744 | . | - | . | gene_id "XLOC_042045"; transcript_id "TCONS_00069751"; exon_number "2"; |
| oId "CUFF.74303.1"; tss_id "TSS52934"; |           |   |   |   |                                                                         |
| chr4 Cufflinks exon169915056           | 169915811 | . | - | . | gene_id "XLOC_042098"; transcript_id "TCONS_00069837"; exon_number "1"; |

|                                        |   |   |   |                                                                         |  |
|----------------------------------------|---|---|---|-------------------------------------------------------------------------|--|
| oId "CUFF.74491.1"; tss_id "TSS53000"; |   |   |   |                                                                         |  |
| chr4 Cufflinks exon169915988 169917386 | . | - | . | gene_id "XLOC_042098"; transcript_id "TCONS_00069837"; exon_number "2"; |  |
| oId "CUFF.74491.1"; tss_id "TSS53000"; |   |   |   |                                                                         |  |
| chr4 Cufflinks exon186846844 186846868 | . | - | . | gene_id "XLOC_042263"; transcript_id "TCONS_00070067"; exon_number "1"; |  |
| oId "CUFF.75013.1"; tss_id "TSS53194"; |   |   |   |                                                                         |  |
| chr4 Cufflinks exon186854090 186854498 | . | - | . | gene_id "XLOC_042263"; transcript_id "TCONS_00070067"; exon_number "2"; |  |
| oId "CUFF.75013.1"; tss_id "TSS53194"; |   |   |   |                                                                         |  |
| chr5 Cufflinks exon21563277 21563803   | . | + | . | gene_id "XLOC_042514"; transcript_id "TCONS_00070431"; exon_number "1"; |  |
| oId "CUFF.75749.1"; tss_id "TSS53491"; |   |   |   |                                                                         |  |
| chr5 Cufflinks exon21565124 21565952   | . | + | . | gene_id "XLOC_042514"; transcript_id "TCONS_00070431"; exon_number "2"; |  |
| oId "CUFF.75749.1"; tss_id "TSS53491"; |   |   |   |                                                                         |  |
| chr5 Cufflinks exon55034062 55034071   | . | + | . | gene_id "XLOC_042643"; transcript_id "TCONS_00070645"; exon_number "1"; |  |
| oId "CUFF.76519.1"; tss_id "TSS53655"; |   |   |   |                                                                         |  |
| chr5 Cufflinks exon55240519 55240888   | . | + | . | gene_id "XLOC_042643"; transcript_id "TCONS_00070645"; exon_number "2"; |  |
| oId "CUFF.76519.1"; tss_id "TSS53655"; |   |   |   |                                                                         |  |
| chr5 Cufflinks exon56205087 56205570   | . | + | . | gene_id "XLOC_042647"; transcript_id "TCONS_00070658"; exon_number "1"; |  |
| oId "CUFF.76537.3"; tss_id "TSS53660"; |   |   |   |                                                                         |  |
| chr5 Cufflinks exon56208838 56208961   | . | + | . | gene_id "XLOC_042647"; transcript_id "TCONS_00070658"; exon_number "2"; |  |
| oId "CUFF.76537.3"; tss_id "TSS53660"; |   |   |   |                                                                         |  |
| chr5 Cufflinks exon56209701 56209816   | . | + | . | gene_id "XLOC_042647"; transcript_id "TCONS_00070658"; exon_number "3"; |  |
| oId "CUFF.76537.3"; tss_id "TSS53660"; |   |   |   |                                                                         |  |
| chr5 Cufflinks exon56210688 56210793   | . | + | . | gene_id "XLOC_042647"; transcript_id "TCONS_00070658"; exon_number "4"; |  |
| oId "CUFF.76537.3"; tss_id "TSS53660"; |   |   |   |                                                                         |  |
| chr5 Cufflinks exon56212642 56214891   | . | + | . | gene_id "XLOC_042647"; transcript_id "TCONS_00070658"; exon_number "5"; |  |
| oId "CUFF.76537.3"; tss_id "TSS53660"; |   |   |   |                                                                         |  |
| chr5 Cufflinks exon56206190 56206221   | . | + | . | gene_id "XLOC_042647"; transcript_id "TCONS_00070660"; exon_number "1"; |  |
| oId "CUFF.76537.7"; tss_id "TSS53662"; |   |   |   |                                                                         |  |
| chr5 Cufflinks exon56208838 56208961   | . | + | . | gene_id "XLOC_042647"; transcript_id "TCONS_00070660"; exon_number "2"; |  |
| oId "CUFF.76537.7"; tss_id "TSS53662"; |   |   |   |                                                                         |  |
| chr5 Cufflinks exon56209701 56209816   | . | + | . | gene_id "XLOC_042647"; transcript_id "TCONS_00070660"; exon_number "3"; |  |
| oId "CUFF.76537.7"; tss_id "TSS53662"; |   |   |   |                                                                         |  |
| chr5 Cufflinks exon56210688 56210793   | . | + | . | gene_id "XLOC_042647"; transcript_id "TCONS_00070660"; exon_number "4"; |  |
| oId "CUFF.76537.7"; tss_id "TSS53662"; |   |   |   |                                                                         |  |
| chr5 Cufflinks exon56212642 56214891   | . | + | . | gene_id "XLOC_042647"; transcript_id "TCONS_00070660"; exon_number "5"; |  |
| oId "CUFF.76537.7"; tss_id "TSS53662"; |   |   |   |                                                                         |  |
| chr5 Cufflinks exon65901015 65901779   | . | + | . | gene_id "XLOC_042698"; transcript_id "TCONS_00070744"; exon_number "1"; |  |
| oId "CUFF.76702.1"; tss_id "TSS53726"; |   |   |   |                                                                         |  |
| chr5 Cufflinks exon65902231 65902282   | . | + | . | gene_id "XLOC_042698"; transcript_id "TCONS_00070744"; exon_number "2"; |  |
| oId "CUFF.76702.1"; tss_id "TSS53726"; |   |   |   |                                                                         |  |
| chr5 Cufflinks exon94890782 94891108   | . | + | . | gene_id "XLOC_043107"; transcript_id "TCONS_00071277"; exon_number "1"; |  |
| oId "CUFF.77905.2"; tss_id "TSS54178"; |   |   |   |                                                                         |  |
| chr5 Cufflinks exon94891912 94892767   | . | + | . | gene_id "XLOC_043107"; transcript_id "TCONS_00071277"; exon_number "2"; |  |
| oId "CUFF.77905.2"; tss_id "TSS54178"; |   |   |   |                                                                         |  |



chr5 Cufflinks exon109776726 109776771 . + . gene\_id "XLOC\_043272"; transcript\_id "TCONS\_00071495"; exon\_number "1";  
oId "CUFF.78321.1"; tss\_id "TSS54361";

chr5 Cufflinks exon109830964 109831102 . + . gene\_id "XLOC\_043272"; transcript\_id "TCONS\_00071495"; exon\_number "2";  
oId "CUFF.78321.1"; tss\_id "TSS54361";

chr5 Cufflinks exon109833007 109833122 . + . gene\_id "XLOC\_043272"; transcript\_id "TCONS\_00071495"; exon\_number "3";  
oId "CUFF.78321.1"; tss\_id "TSS54361";

chr5 Cufflinks exon115783194 115783487 . + . gene\_id "XLOC\_043328"; transcript\_id "TCONS\_00071578"; exon\_number "1";  
oId "CUFF.78528.2"; tss\_id "TSS54425";

chr5 Cufflinks exon115785324 115785513 . + . gene\_id "XLOC\_043328"; transcript\_id "TCONS\_00071578"; exon\_number "2";  
oId "CUFF.78528.2"; tss\_id "TSS54425";

chr5 Cufflinks exon115806887 115807369 . + . gene\_id "XLOC\_043328"; transcript\_id "TCONS\_00071578"; exon\_number "3";  
oId "CUFF.78528.2"; tss\_id "TSS54425";

chr5 Cufflinks exon141704858 141704935 . + . gene\_id "XLOC\_043670"; transcript\_id "TCONS\_00072092"; exon\_number "1";  
oId "CUFF.79497.2"; tss\_id "TSS54839";

chr5 Cufflinks exon141724981 141725050 . + . gene\_id "XLOC\_043670"; transcript\_id "TCONS\_00072092"; exon\_number "2";  
oId "CUFF.79497.2"; tss\_id "TSS54839";

chr5 Cufflinks exon141732791 141733148 . + . gene\_id "XLOC\_043670"; transcript\_id "TCONS\_00072092"; exon\_number "3";  
oId "CUFF.79497.2"; tss\_id "TSS54839";

chr5 Cufflinks exon141843535 141843624 . + . gene\_id "XLOC\_043670"; transcript\_id "TCONS\_00072092"; exon\_number "4";  
oId "CUFF.79497.2"; tss\_id "TSS54839";

chr5 Cufflinks exon141909560 141909786 . + . gene\_id "XLOC\_043670"; transcript\_id "TCONS\_00072092"; exon\_number "5";  
oId "CUFF.79497.2"; tss\_id "TSS54839";

chr5 Cufflinks exon142985119 142985296 . + . gene\_id "XLOC\_043680"; transcript\_id "TCONS\_00072106"; exon\_number "1";  
oId "CUFF.79524.2"; tss\_id "TSS54852";

chr5 Cufflinks exon142987763 142987873 . + . gene\_id "XLOC\_043680"; transcript\_id "TCONS\_00072106"; exon\_number "2";  
oId "CUFF.79524.2"; tss\_id "TSS54852";

chr5 Cufflinks exon143042460 143042522 . + . gene\_id "XLOC\_043680"; transcript\_id "TCONS\_00072106"; exon\_number "3";  
oId "CUFF.79524.2"; tss\_id "TSS54852";

chr5 Cufflinks exon143048959 143049051 . + . gene\_id "XLOC\_043680"; transcript\_id "TCONS\_00072106"; exon\_number "4";  
oId "CUFF.79524.2"; tss\_id "TSS54852";

chr5 Cufflinks exon143052144 143052262 . + . gene\_id "XLOC\_043680"; transcript\_id "TCONS\_00072106"; exon\_number "5";  
oId "CUFF.79524.2"; tss\_id "TSS54852";

chr5 Cufflinks exon143200045 143200284 . + . gene\_id "XLOC\_043680"; transcript\_id "TCONS\_00072106"; exon\_number "6";  
oId "CUFF.79524.2"; tss\_id "TSS54852";

chr5 Cufflinks exon149522517 149522652 . + . gene\_id "XLOC\_043721"; transcript\_id "TCONS\_00072177"; exon\_number "1";  
oId "CUFF.79656.1"; tss\_id "TSS54908";

chr5 Cufflinks exon149523558 149524737 . + . gene\_id "XLOC\_043721"; transcript\_id "TCONS\_00072177"; exon\_number "2";  
oId "CUFF.79656.1"; tss\_id "TSS54908";

chr5 Cufflinks exon1082117 1082172 . - . gene\_id "XLOC\_044021"; transcript\_id "TCONS\_00072678"; exon\_number "1"; oId  
"CUFF.75235.1"; tss\_id "TSS55282";

chr5 Cufflinks exon1082203 1082633 . - . gene\_id "XLOC\_044021"; transcript\_id "TCONS\_00072678"; exon\_number "2"; oId  
"CUFF.75235.1"; tss\_id "TSS55282";

chr5 Cufflinks exon41730167 41731872 . - . gene\_id "XLOC\_044324"; transcript\_id "TCONS\_00073152"; exon\_number "1";

oId "CUFF.76158.3"; tss\_id "TSS55657";  
chr5 Cufflinks exon41739492 41739593 . - . gene\_id "XLOC\_044324"; transcript\_id "TCONS\_00073152"; exon\_number "2";  
oId "CUFF.76158.3"; tss\_id "TSS55657";  
chr5 Cufflinks exon41740567 41740643 . - . gene\_id "XLOC\_044324"; transcript\_id "TCONS\_00073152"; exon\_number "3";  
oId "CUFF.76158.3"; tss\_id "TSS55657";  
chr5 Cufflinks exon53389743 53390115 . - . gene\_id "XLOC\_044391"; transcript\_id "TCONS\_00073264"; exon\_number "1";  
oId "CUFF.76474.1"; tss\_id "TSS55744";  
chr5 Cufflinks exon53390717 53391620 . - . gene\_id "XLOC\_044391"; transcript\_id "TCONS\_00073264"; exon\_number "2";  
oId "CUFF.76474.1"; tss\_id "TSS55744";  
chr5 Cufflinks exon66287293 66287365 . - . gene\_id "XLOC\_044450"; transcript\_id "TCONS\_00073366"; exon\_number "1";  
oId "CUFF.76779.1"; tss\_id "TSS55816";  
chr5 Cufflinks exon66297606 66297877 . - . gene\_id "XLOC\_044450"; transcript\_id "TCONS\_00073366"; exon\_number "2";  
oId "CUFF.76779.1"; tss\_id "TSS55816";  
chr5 Cufflinks exon66299672 66300014 . - . gene\_id "XLOC\_044450"; transcript\_id "TCONS\_00073366"; exon\_number "3";  
oId "CUFF.76779.1"; tss\_id "TSS55816";  
chr5 Cufflinks exon93952830 93953867 . - . gene\_id "XLOC\_044664"; transcript\_id "TCONS\_00073747"; exon\_number "1";  
oId "CUFF.77870.10"; tss\_id "TSS56098";  
chr5 Cufflinks exon93954205 93954309 . - . gene\_id "XLOC\_044664"; transcript\_id "TCONS\_00073747"; exon\_number "2";  
oId "CUFF.77870.10"; tss\_id "TSS56098";  
chr5 Cufflinks exon114875364 114875571 . - . gene\_id "XLOC\_044782"; transcript\_id "TCONS\_00073921"; exon\_number "1";  
oId "CUFF.78431.1"; tss\_id "TSS56239";  
chr5 Cufflinks exon114876582 114876735 . - . gene\_id "XLOC\_044782"; transcript\_id "TCONS\_00073921"; exon\_number "2";  
oId "CUFF.78431.1"; tss\_id "TSS56239";  
chr5 Cufflinks exon114878531 114878634 . - . gene\_id "XLOC\_044782"; transcript\_id "TCONS\_00073921"; exon\_number "3";  
oId "CUFF.78431.1"; tss\_id "TSS56239";  
chr5 Cufflinks exon139712428 139713865 . - . gene\_id "XLOC\_045003"; transcript\_id "TCONS\_00074254"; exon\_number "1";  
oId "CUFF.79330.1"; tss\_id "TSS56516";  
chr5 Cufflinks exon139714243 139714333 . - . gene\_id "XLOC\_045003"; transcript\_id "TCONS\_00074254"; exon\_number "2";  
oId "CUFF.79330.1"; tss\_id "TSS56516";  
chr5 Cufflinks exon139715457 139715612 . - . gene\_id "XLOC\_045003"; transcript\_id "TCONS\_00074254"; exon\_number "3";  
oId "CUFF.79330.1"; tss\_id "TSS56516";  
chr5 Cufflinks exon139721801 139721825 . - . gene\_id "XLOC\_045003"; transcript\_id "TCONS\_00074254"; exon\_number "4";  
oId "CUFF.79330.1"; tss\_id "TSS56516";  
chr5 Cufflinks exon139712428 139713865 . - . gene\_id "XLOC\_045003"; transcript\_id "TCONS\_00074255"; exon\_number "1";  
oId "CUFF.79330.2"; tss\_id "TSS56517";  
chr5 Cufflinks exon139714243 139714333 . - . gene\_id "XLOC\_045003"; transcript\_id "TCONS\_00074255"; exon\_number "2";  
oId "CUFF.79330.2"; tss\_id "TSS56517";  
chr5 Cufflinks exon139715457 139715612 . - . gene\_id "XLOC\_045003"; transcript\_id "TCONS\_00074255"; exon\_number "3";  
oId "CUFF.79330.2"; tss\_id "TSS56517";  
chr5 Cufflinks exon139721833 139721959 . - . gene\_id "XLOC\_045003"; transcript\_id "TCONS\_00074255"; exon\_number "4";  
oId "CUFF.79330.2"; tss\_id "TSS56517";  
chr5 Cufflinks exon140894562 140896575 . - . gene\_id "XLOC\_045019"; transcript\_id "TCONS\_00074275"; exon\_number "1";  
oId "CUFF.79456.3"; tss\_id "TSS56536";

chr5 Cufflinks exon140899010 140899039 . - . gene\_id "XLOC\_045019"; transcript\_id "TCONS\_00074275"; exon\_number "2";  
oId "CUFF.79456.3"; tss\_id "TSS56536";

chr5 Cufflinks exon177865732 177866811 . - . gene\_id "XLOC\_045274"; transcript\_id "TCONS\_00074707"; exon\_number "1";  
oId "CUFF.80423.1"; tss\_id "TSS56847";

chr5 Cufflinks exon177869646 177869884 . - . gene\_id "XLOC\_045274"; transcript\_id "TCONS\_00074707"; exon\_number "2";  
oId "CUFF.80423.1"; tss\_id "TSS56847";

chr6 Cufflinks exon10412551 10412600 . + . gene\_id "XLOC\_045496"; transcript\_id "TCONS\_00075030"; exon\_number "1";  
oId "CUFF.81019.1"; tss\_id "TSS57099";

chr6 Cufflinks exon 10414914 10415284 . + . gene\_id "XLOC\_045496"; transcript\_id "TCONS\_00075030";  
exon\_number "2"; oId "CUFF.81019.1"; tss\_id "TSS57099";

chr6 Cufflinks exon 10415520 10418262 . + . gene\_id "XLOC\_045496"; transcript\_id "TCONS\_00075030";  
exon\_number "3"; oId "CUFF.81019.1"; tss\_id "TSS57099";

chr6 Cufflinks exon 12293515 12294017 . + . gene\_id "XLOC\_045528"; transcript\_id "TCONS\_00075094";  
exon\_number "1"; oId "CUFF.81115.6"; tss\_id "TSS57150";

chr6 Cufflinks exon 12294174 12294329 . + . gene\_id "XLOC\_045528"; transcript\_id "TCONS\_00075094";  
exon\_number "2"; oId "CUFF.81115.6"; tss\_id "TSS57150";

chr6 Cufflinks exon 12294494 12294637 . + . gene\_id "XLOC\_045528"; transcript\_id "TCONS\_00075094";  
exon\_number "3"; oId "CUFF.81115.6"; tss\_id "TSS57150";

chr6 Cufflinks exon 12296195 12297427 . + . gene\_id "XLOC\_045528"; transcript\_id "TCONS\_00075094";  
exon\_number "4"; oId "CUFF.81115.6"; tss\_id "TSS57150";

chr6 Cufflinks exon 20403487 20404063 . + . gene\_id "XLOC\_045603"; transcript\_id "TCONS\_00075202";  
exon\_number "1"; oId "CUFF.81347.3"; tss\_id "TSS57238";

chr6 Cufflinks exon 20431335 20435829 . + . gene\_id "XLOC\_045603"; transcript\_id "TCONS\_00075202";  
exon\_number "2"; oId "CUFF.81347.3"; tss\_id "TSS57238";

chr6 Cufflinks exon 20437749 20438156 . + . gene\_id "XLOC\_045604"; transcript\_id "TCONS\_00075204";  
exon\_number "1"; oId "CUFF.81348.1"; tss\_id "TSS57240";

chr6 Cufflinks exon 20440188 20440935 . + . gene\_id "XLOC\_045604"; transcript\_id "TCONS\_00075204";  
exon\_number "2"; oId "CUFF.81348.1"; tss\_id "TSS57240";

chr6 Cufflinks exon 20437749 20438156 . + . gene\_id "XLOC\_045604"; transcript\_id "TCONS\_00075205";  
exon\_number "1"; oId "CUFF.81348.2"; tss\_id "TSS57240";

chr6 Cufflinks exon 20440947 20441453 . + . gene\_id "XLOC\_045604"; transcript\_id "TCONS\_00075205";  
exon\_number "2"; oId "CUFF.81348.2"; tss\_id "TSS57240";

chr6 Cufflinks exon 42751234 42753069 . + . gene\_id "XLOC\_046035"; transcript\_id "TCONS\_00075922";  
exon\_number "1"; oId "CUFF.82865.2"; tss\_id "TSS57769";

chr6 Cufflinks exon 42758154 42759061 . + . gene\_id "XLOC\_046035"; transcript\_id "TCONS\_00075922";  
exon\_number "2"; oId "CUFF.82865.2"; tss\_id "TSS57769";

chr6 Cufflinks exon 52930203 52930590 . + . gene\_id "XLOC\_046119"; transcript\_id "TCONS\_00076082";  
exon\_number "1"; oId "CUFF.83136.6"; tss\_id "TSS57875";

chr6 Cufflinks exon 52932703 52932728 . + . gene\_id "XLOC\_046119"; transcript\_id "TCONS\_00076082";  
exon\_number "2"; oId "CUFF.83136.6"; tss\_id "TSS57875";

chr6 Cufflinks exon 122793062 122793186 . + . gene\_id "XLOC\_046530"; transcript\_id "TCONS\_00076697";  
exon\_number "1"; oId "CUFF.84714.11"; tss\_id "TSS58351";

chr6 Cufflinks exon 122798996 122799084 . + . gene\_id "XLOC\_046530"; transcript\_id "TCONS\_00076697";

exon\_number "2"; oId "CUFF.84714.11"; tss\_id "TSS58351";  
 chr6 Cufflinks exon 122803044 122803101 . + . gene\_id "XLOC\_046530"; transcript\_id "TCONS\_00076697";  
 exon\_number "3"; oId "CUFF.84714.11"; tss\_id "TSS58351";  
 chr6 Cufflinks exon 122803292 122803411 . + . gene\_id "XLOC\_046530"; transcript\_id "TCONS\_00076697";  
 exon\_number "4"; oId "CUFF.84714.11"; tss\_id "TSS58351";  
 chr6 Cufflinks exon 122902910 122902987 . + . gene\_id "XLOC\_046530"; transcript\_id "TCONS\_00076697";  
 exon\_number "5"; oId "CUFF.84714.11"; tss\_id "TSS58351";  
 chr6 Cufflinks exon 122907064 122907152 . + . gene\_id "XLOC\_046530"; transcript\_id "TCONS\_00076697";  
 exon\_number "6"; oId "CUFF.84714.11"; tss\_id "TSS58351";  
 chr6 Cufflinks exon 122924649 122924711 . + . gene\_id "XLOC\_046530"; transcript\_id "TCONS\_00076697";  
 exon\_number "7"; oId "CUFF.84714.11"; tss\_id "TSS58351";  
 chr6 Cufflinks exon 143381947 143382203 . + . gene\_id "XLOC\_046692"; transcript\_id "TCONS\_00076942";  
 exon\_number "1"; oId "CUFF.85214.1"; tss\_id "TSS58542";  
 chr6 Cufflinks exon 143382351 143382712 . + . gene\_id "XLOC\_046692"; transcript\_id "TCONS\_00076942";  
 exon\_number "2"; oId "CUFF.85214.1"; tss\_id "TSS58542";  
 chr6 Cufflinks exon 158653188 158653335 . + . gene\_id "XLOC\_046824"; transcript\_id "TCONS\_00077159";  
 exon\_number "1"; oId "CUFF.85674.2"; tss\_id "TSS58712";  
 chr6 Cufflinks exon 158688266 158688304 . + . gene\_id "XLOC\_046824"; transcript\_id "TCONS\_00077159"; exon\_number "2";  
 oId "CUFF.85674.2"; tss\_id "TSS58712";  
 chr6 Cufflinks exon 158703295 158703410 . + . gene\_id "XLOC\_046824"; transcript\_id "TCONS\_00077159"; exon\_number "3";  
 oId "CUFF.85674.2"; tss\_id "TSS58712";  
 chr6 Cufflinks exon 158733083 158735300 . + . gene\_id "XLOC\_046824"; transcript\_id "TCONS\_00077159"; exon\_number "4";  
 oId "CUFF.85674.2"; tss\_id "TSS58712";  
 chr6 Cufflinks exon 158820296 158820316 . + . gene\_id "XLOC\_046824"; transcript\_id "TCONS\_00077159"; exon\_number "5";  
 oId "CUFF.85674.2"; tss\_id "TSS58712";  
 chr6 Cufflinks exon 159049934 159050157 . + . gene\_id "XLOC\_046836"; transcript\_id "TCONS\_00077182"; exon\_number "1";  
 oId "CUFF.85693.1"; tss\_id "TSS58731";  
 chr6 Cufflinks exon 159050403 159050723 . + . gene\_id "XLOC\_046836"; transcript\_id "TCONS\_00077182"; exon\_number "2";  
 oId "CUFF.85693.1"; tss\_id "TSS58731";  
 chr6 Cufflinks exon 29815610 29816180 . - . gene\_id "XLOC\_047270"; transcript\_id "TCONS\_00077911"; exon\_number "1";  
 oId "CUFF.81879.1"; tss\_id "TSS59254";  
 chr6 Cufflinks exon 29816833 29816925 . - . gene\_id "XLOC\_047270"; transcript\_id "TCONS\_00077911"; exon\_number "2";  
 oId "CUFF.81879.1"; tss\_id "TSS59254";  
 chr6 Cufflinks exon 29820099 29820263 . - . gene\_id "XLOC\_047270"; transcript\_id "TCONS\_00077911"; exon\_number "3";  
 oId "CUFF.81879.1"; tss\_id "TSS59254";  
 chr6 Cufflinks exon 29825123 29825215 . - . gene\_id "XLOC\_047270"; transcript\_id "TCONS\_00077911"; exon\_number "4";  
 oId "CUFF.81879.1"; tss\_id "TSS59254";  
 chr6 Cufflinks exon 29955954 29955992 . - . gene\_id "XLOC\_047270"; transcript\_id "TCONS\_00077911"; exon\_number "5";  
 oId "CUFF.81879.1"; tss\_id "TSS59254";  
 chr6 Cufflinks exon 29817780 29818406 . - . gene\_id "XLOC\_047270"; transcript\_id "TCONS\_00077912"; exon\_number "1";  
 oId "CUFF.81879.2"; tss\_id "TSS59255";  
 chr6 Cufflinks exon 29820099 29820124 . - . gene\_id "XLOC\_047270"; transcript\_id "TCONS\_00077912"; exon\_number "2";  
 oId "CUFF.81879.2"; tss\_id "TSS59255";

|                                        |           |   |   |   |                                                                         |
|----------------------------------------|-----------|---|---|---|-------------------------------------------------------------------------|
| chr6 Cufflinks exon29895205            | 29895376  | . | - | . | gene_id "XLOC_047279"; transcript_id "TCONS_00077921"; exon_number "1"; |
| oId "CUFF.81908.1"; tss_id "TSS59264"; |           |   |   |   |                                                                         |
| chr6 Cufflinks exon29895930            | 29896033  | . | - | . | gene_id "XLOC_047279"; transcript_id "TCONS_00077921"; exon_number "2"; |
| oId "CUFF.81908.1"; tss_id "TSS59264"; |           |   |   |   |                                                                         |
| chr6 Cufflinks exon29896216            | 29896319  | . | - | . | gene_id "XLOC_047279"; transcript_id "TCONS_00077921"; exon_number "3"; |
| oId "CUFF.81908.1"; tss_id "TSS59264"; |           |   |   |   |                                                                         |
| chr6 Cufflinks exon37661068            | 37661177  | . | - | . | gene_id "XLOC_047485"; transcript_id "TCONS_00078277"; exon_number "1"; |
| oId "CUFF.82604.1"; tss_id "TSS59531"; |           |   |   |   |                                                                         |
| chr6 Cufflinks exon37661352            | 37661832  | . | - | . | gene_id "XLOC_047485"; transcript_id "TCONS_00078277"; exon_number "2"; |
| oId "CUFF.82604.1"; tss_id "TSS59531"; |           |   |   |   |                                                                         |
| chr6 Cufflinks exon41671793            | 41673490  | . | - | . | gene_id "XLOC_047547"; transcript_id "TCONS_00078378"; exon_number "1"; |
| oId "CUFF.82804.1"; tss_id "TSS59613"; |           |   |   |   |                                                                         |
| chr6 Cufflinks exon41678655            | 41678681  | . | - | . | gene_id "XLOC_047547"; transcript_id "TCONS_00078378"; exon_number "2"; |
| oId "CUFF.82804.1"; tss_id "TSS59613"; |           |   |   |   |                                                                         |
| chr6 Cufflinks exon118452449           | 118457141 | . | - | . | gene_id "XLOC_048032"; transcript_id "TCONS_00079205"; exon_number "1"; |
| oId "CUFF.84484.1"; tss_id "TSS60254"; |           |   |   |   |                                                                         |
| chr6 Cufflinks exon118462441           | 118462483 | . | - | . | gene_id "XLOC_048032"; transcript_id "TCONS_00079205"; exon_number "2"; |
| oId "CUFF.84484.1"; tss_id "TSS60254"; |           |   |   |   |                                                                         |
| chr6 Cufflinks exon118452449           | 118455693 | . | - | . | gene_id "XLOC_048032"; transcript_id "TCONS_00079206"; exon_number "1"; |
| oId "CUFF.84484.2"; tss_id "TSS60255"; |           |   |   |   |                                                                         |
| chr6 Cufflinks exon118457017           | 118457141 | . | - | . | gene_id "XLOC_048032"; transcript_id "TCONS_00079206"; exon_number "2"; |
| oId "CUFF.84484.2"; tss_id "TSS60255"; |           |   |   |   |                                                                         |
| chr6 Cufflinks exon118489680           | 118489707 | . | - | . | gene_id "XLOC_048032"; transcript_id "TCONS_00079206"; exon_number "3"; |
| oId "CUFF.84484.2"; tss_id "TSS60255"; |           |   |   |   |                                                                         |
| chr6 Cufflinks exon118452449           | 118455211 | . | - | . | gene_id "XLOC_048032"; transcript_id "TCONS_00079207"; exon_number "1"; |
| oId "CUFF.84484.3"; tss_id "TSS60255"; |           |   |   |   |                                                                         |
| chr6 Cufflinks exon118457017           | 118457141 | . | - | . | gene_id "XLOC_048032"; transcript_id "TCONS_00079207"; exon_number "2"; |
| oId "CUFF.84484.3"; tss_id "TSS60255"; |           |   |   |   |                                                                         |
| chr6 Cufflinks exon118489699           | 118489712 | . | - | . | gene_id "XLOC_048032"; transcript_id "TCONS_00079207"; exon_number "3"; |
| oId "CUFF.84484.3"; tss_id "TSS60255"; |           |   |   |   |                                                                         |
| chr6 Cufflinks exon118452449           | 118455693 | . | - | . | gene_id "XLOC_048032"; transcript_id "TCONS_00079208"; exon_number "1"; |
| oId "CUFF.84484.4"; tss_id "TSS60255"; |           |   |   |   |                                                                         |
| chr6 Cufflinks exon118457017           | 118457102 | . | - | . | gene_id "XLOC_048032"; transcript_id "TCONS_00079208"; exon_number "2"; |
| oId "CUFF.84484.4"; tss_id "TSS60255"; |           |   |   |   |                                                                         |
| chr6 Cufflinks exon118489699           | 118489726 | . | - | . | gene_id "XLOC_048032"; transcript_id "TCONS_00079208"; exon_number "3"; |
| oId "CUFF.84484.4"; tss_id "TSS60255"; |           |   |   |   |                                                                         |
| chr6 Cufflinks exon124301158           | 124302875 | . | - | . | gene_id "XLOC_048077"; transcript_id "TCONS_00079270"; exon_number "1"; |
| oId "CUFF.84734.3"; tss_id "TSS60308"; |           |   |   |   |                                                                         |
| chr6 Cufflinks exon124304559           | 124304598 | . | - | . | gene_id "XLOC_048077"; transcript_id "TCONS_00079270"; exon_number "2"; |
| oId "CUFF.84734.3"; tss_id "TSS60308"; |           |   |   |   |                                                                         |
| chr6 Cufflinks exon124316626           | 124316905 | . | - | . | gene_id "XLOC_048077"; transcript_id "TCONS_00079270"; exon_number "3"; |
| oId "CUFF.84734.3"; tss_id "TSS60308"; |           |   |   |   |                                                                         |
| chr6 Cufflinks exon124303982           | 124304597 | . | - | . | gene_id "XLOC_048077"; transcript_id "TCONS_00079271"; exon_number "1"; |

oId "CUFF.84734.4"; tss\_id "TSS60306";  
chr6 Cufflinks exon124316625 124316819 . - . gene\_id "XLOC\_048077"; transcript\_id "TCONS\_00079271"; exon\_number "2";  
oId "CUFF.84734.4"; tss\_id "TSS60306";  
chr6 Cufflinks exon124325521 124325562 . - . gene\_id "XLOC\_048077"; transcript\_id "TCONS\_00079271"; exon\_number "3";  
oId "CUFF.84734.4"; tss\_id "TSS60306";  
chr6 Cufflinks exon149979289 149983374 . - . gene\_id "XLOC\_048279"; transcript\_id "TCONS\_00079609"; exon\_number "1";  
oId "CUFF.85457.1"; tss\_id "TSS60565";  
chr6 Cufflinks exon149984328 149984440 . - . gene\_id "XLOC\_048279"; transcript\_id "TCONS\_00079609"; exon\_number "2";  
oId "CUFF.85457.1"; tss\_id "TSS60565";  
chr6 Cufflinks exon166193911 166195411 . - . gene\_id "XLOC\_048388"; transcript\_id "TCONS\_00079799"; exon\_number "1";  
oId "CUFF.85838.2"; tss\_id "TSS60713";  
chr6 Cufflinks exon166204912 166205581 . - . gene\_id "XLOC\_048388"; transcript\_id "TCONS\_00079799"; exon\_number "2";  
oId "CUFF.85838.2"; tss\_id "TSS60713";  
chr6 Cufflinks exon166205716 166205823 . - . gene\_id "XLOC\_048388"; transcript\_id "TCONS\_00079799"; exon\_number "3";  
oId "CUFF.85838.2"; tss\_id "TSS60713";  
chr6 Cufflinks exon166205931 166206227 . - . gene\_id "XLOC\_048388"; transcript\_id "TCONS\_00079799"; exon\_number "4";  
oId "CUFF.85838.2"; tss\_id "TSS60713";  
chr6 Cufflinks exon166197773 166200173 . - . gene\_id "XLOC\_048388"; transcript\_id "TCONS\_00079803"; exon\_number "1";  
oId "CUFF.85838.3"; tss\_id "TSS60713";  
chr6 Cufflinks exon166205399 166205581 . - . gene\_id "XLOC\_048388"; transcript\_id "TCONS\_00079803"; exon\_number "2";  
oId "CUFF.85838.3"; tss\_id "TSS60713";  
chr6 Cufflinks exon166205716 166205823 . - . gene\_id "XLOC\_048388"; transcript\_id "TCONS\_00079803"; exon\_number "3";  
oId "CUFF.85838.3"; tss\_id "TSS60713";  
chr6 Cufflinks exon166205931 166206227 . - . gene\_id "XLOC\_048388"; transcript\_id "TCONS\_00079803"; exon\_number "4";  
oId "CUFF.85838.3"; tss\_id "TSS60713";  
chr6 Cufflinks exon169958462 169958973 . - . gene\_id "XLOC\_048476"; transcript\_id "TCONS\_00079905"; exon\_number "1";  
oId "CUFF.86031.1"; tss\_id "TSS60810";  
chr6 Cufflinks exon169959141 169959259 . - . gene\_id "XLOC\_048476"; transcript\_id "TCONS\_00079905"; exon\_number "2";  
oId "CUFF.86031.1"; tss\_id "TSS60810";  
chr6 Cufflinks exon169959365 169959540 . - . gene\_id "XLOC\_048476"; transcript\_id "TCONS\_00079905"; exon\_number "3";  
oId "CUFF.86031.1"; tss\_id "TSS60810";  
chr6 Cufflinks exon170027168 170027243 . - . gene\_id "XLOC\_048481"; transcript\_id "TCONS\_00079912"; exon\_number "1";  
oId "CUFF.86040.1"; tss\_id "TSS60816";  
chr6 Cufflinks exon170027641 170028544 . - . gene\_id "XLOC\_048481"; transcript\_id "TCONS\_00079912"; exon\_number "2";  
oId "CUFF.86040.1"; tss\_id "TSS60816";  
chr7 Cufflinks exon1084209 1084294 . + . gene\_id "XLOC\_048538"; transcript\_id "TCONS\_00080009"; exon\_number "1"; oId  
"CUFF.86166.2"; tss\_id "TSS60883";  
chr7 Cufflinks exon1084973 1087690 . + . gene\_id "XLOC\_048538"; transcript\_id "TCONS\_00080009"; exon\_number "2"; oId  
"CUFF.86166.2"; tss\_id "TSS60883";  
chr7 Cufflinks exon18330061 18330138 . + . gene\_id "XLOC\_048649"; transcript\_id "TCONS\_00080225"; exon\_number "1";  
oId "CUFF.86610.1"; tss\_id "TSS61034";  
chr7 Cufflinks exon18365135 18365215 . + . gene\_id "XLOC\_048649"; transcript\_id "TCONS\_00080225"; exon\_number "2";  
oId "CUFF.86610.1"; tss\_id "TSS61034";

|                                        |          |   |   |   |                                                                         |
|----------------------------------------|----------|---|---|---|-------------------------------------------------------------------------|
| chr7 Cufflinks exon18367072            | 18367684 | . | + | . | gene_id "XLOC_048649"; transcript_id "TCONS_00080225"; exon_number "3"; |
| oId "CUFF.86610.1"; tss_id "TSS61034"; |          |   |   |   |                                                                         |
| chr7 Cufflinks exon23237568            | 23237596 | . | + | . | gene_id "XLOC_048677"; transcript_id "TCONS_00080280"; exon_number "1"; |
| oId "CUFF.86723.1"; tss_id "TSS61069"; |          |   |   |   |                                                                         |
| chr7 Cufflinks exon23238113            | 23238290 | . | + | . | gene_id "XLOC_048677"; transcript_id "TCONS_00080280"; exon_number "2"; |
| oId "CUFF.86723.1"; tss_id "TSS61069"; |          |   |   |   |                                                                         |
| chr7 Cufflinks exon23312892            | 23313233 | . | + | . | gene_id "XLOC_048680"; transcript_id "TCONS_00080285"; exon_number "1"; |
| oId "CUFF.86726.3"; tss_id "TSS61073"; |          |   |   |   |                                                                         |
| chr7 Cufflinks exon23313684            | 23314734 | . | + | . | gene_id "XLOC_048680"; transcript_id "TCONS_00080285"; exon_number "2"; |
| oId "CUFF.86726.3"; tss_id "TSS61073"; |          |   |   |   |                                                                         |
| chr7 Cufflinks exon39554873            | 39554905 | . | + | . | gene_id "XLOC_048873"; transcript_id "TCONS_00080550"; exon_number "1"; |
| oId "CUFF.87454.1"; tss_id "TSS61293"; |          |   |   |   |                                                                         |
| chr7 Cufflinks exon39747288            | 39747723 | . | + | . | gene_id "XLOC_048873"; transcript_id "TCONS_00080550"; exon_number "2"; |
| oId "CUFF.87454.1"; tss_id "TSS61293"; |          |   |   |   |                                                                         |
| chr7 Cufflinks exon48086289            | 48086425 | . | + | . | gene_id "XLOC_048941"; transcript_id "TCONS_00080684"; exon_number "1"; |
| oId "CUFF.87705.4"; tss_id "TSS61386"; |          |   |   |   |                                                                         |
| chr7 Cufflinks exon48089477            | 48089574 | . | + | . | gene_id "XLOC_048941"; transcript_id "TCONS_00080684"; exon_number "2"; |
| oId "CUFF.87705.4"; tss_id "TSS61386"; |          |   |   |   |                                                                         |
| chr7 Cufflinks exon48092297            | 48092520 | . | + | . | gene_id "XLOC_048941"; transcript_id "TCONS_00080684"; exon_number "3"; |
| oId "CUFF.87705.4"; tss_id "TSS61386"; |          |   |   |   |                                                                         |
| chr7 Cufflinks exon48099823            | 48100901 | . | + | . | gene_id "XLOC_048941"; transcript_id "TCONS_00080684"; exon_number "4"; |
| oId "CUFF.87705.4"; tss_id "TSS61386"; |          |   |   |   |                                                                         |
| chr7 Cufflinks exon48086384            | 48086425 | . | + | . | gene_id "XLOC_048941"; transcript_id "TCONS_00080685"; exon_number "1"; |
| oId "CUFF.87705.5"; tss_id "TSS61386"; |          |   |   |   |                                                                         |
| chr7 Cufflinks exon48089477            | 48089574 | . | + | . | gene_id "XLOC_048941"; transcript_id "TCONS_00080685"; exon_number "2"; |
| oId "CUFF.87705.5"; tss_id "TSS61386"; |          |   |   |   |                                                                         |
| chr7 Cufflinks exon48092297            | 48092520 | . | + | . | gene_id "XLOC_048941"; transcript_id "TCONS_00080685"; exon_number "3"; |
| oId "CUFF.87705.5"; tss_id "TSS61386"; |          |   |   |   |                                                                         |
| chr7 Cufflinks exon48094192            | 48094203 | . | + | . | gene_id "XLOC_048941"; transcript_id "TCONS_00080685"; exon_number "4"; |
| oId "CUFF.87705.5"; tss_id "TSS61386"; |          |   |   |   |                                                                         |
| chr7 Cufflinks exon48099823            | 48100901 | . | + | . | gene_id "XLOC_048941"; transcript_id "TCONS_00080685"; exon_number "5"; |
| oId "CUFF.87705.5"; tss_id "TSS61386"; |          |   |   |   |                                                                         |
| chr7 Cufflinks exon48086413            | 48086425 | . | + | . | gene_id "XLOC_048941"; transcript_id "TCONS_00080686"; exon_number "1"; |
| oId "CUFF.87705.6"; tss_id "TSS61387"; |          |   |   |   |                                                                         |
| chr7 Cufflinks exon48089477            | 48089574 | . | + | . | gene_id "XLOC_048941"; transcript_id "TCONS_00080686"; exon_number "2"; |
| oId "CUFF.87705.6"; tss_id "TSS61387"; |          |   |   |   |                                                                         |
| chr7 Cufflinks exon48099823            | 48100901 | . | + | . | gene_id "XLOC_048941"; transcript_id "TCONS_00080686"; exon_number "3"; |
| oId "CUFF.87705.6"; tss_id "TSS61387"; |          |   |   |   |                                                                         |
| chr7 Cufflinks exon65670259            | 65670509 | . | + | . | gene_id "XLOC_049043"; transcript_id "TCONS_00080844"; exon_number "1"; |
| oId "CUFF.88086.1"; tss_id "TSS61505"; |          |   |   |   |                                                                         |
| chr7 Cufflinks exon65751498            | 65751696 | . | + | . | gene_id "XLOC_049043"; transcript_id "TCONS_00080844"; exon_number "2"; |
| oId "CUFF.88086.1"; tss_id "TSS61505"; |          |   |   |   |                                                                         |
| chr7 Cufflinks exon65817492            | 65817542 | . | + | . | gene_id "XLOC_049043"; transcript_id "TCONS_00080844"; exon_number "3"; |

|                                        |   |   |   |                                                                         |  |
|----------------------------------------|---|---|---|-------------------------------------------------------------------------|--|
| oId "CUFF.88086.1"; tss_id "TSS61505"; |   |   |   |                                                                         |  |
| chr7 Cufflinks exon65821812 65821860   | . | + | . | gene_id "XLOC_049043"; transcript_id "TCONS_00080844"; exon_number "4"; |  |
| oId "CUFF.88086.1"; tss_id "TSS61505"; |   |   |   |                                                                         |  |
| chr7 Cufflinks exon65823786 65824877   | . | + | . | gene_id "XLOC_049043"; transcript_id "TCONS_00080844"; exon_number "5"; |  |
| oId "CUFF.88086.1"; tss_id "TSS61505"; |   |   |   |                                                                         |  |
| chr7 Cufflinks exon72714513 72714641   | . | + | . | gene_id "XLOC_049154"; transcript_id "TCONS_00081006"; exon_number "1"; |  |
| oId "CUFF.88403.1"; tss_id "TSS61630"; |   |   |   |                                                                         |  |
| chr7 Cufflinks exon72715070 72716510   | . | + | . | gene_id "XLOC_049154"; transcript_id "TCONS_00081006"; exon_number "2"; |  |
| oId "CUFF.88403.1"; tss_id "TSS61630"; |   |   |   |                                                                         |  |
| chr7 Cufflinks exon96786624 96786643   | . | + | . | gene_id "XLOC_049339"; transcript_id "TCONS_00081327"; exon_number "1"; |  |
| oId "CUFF.89148.3"; tss_id "TSS61863"; |   |   |   |                                                                         |  |
| chr7 Cufflinks exon96810324 96811075   | . | + | . | gene_id "XLOC_049339"; transcript_id "TCONS_00081327"; exon_number "2"; |  |
| oId "CUFF.89148.3"; tss_id "TSS61863"; |   |   |   |                                                                         |  |
| chr7 Cufflinks exon100659993 100660023 | . | + | . | gene_id "XLOC_049417"; transcript_id "TCONS_00081468"; exon_number "1"; |  |
| oId "CUFF.89512.2"; tss_id "TSS61961"; |   |   |   |                                                                         |  |
| chr7 Cufflinks exon100660856 100660944 | . | + | . | gene_id "XLOC_049417"; transcript_id "TCONS_00081468"; exon_number "2"; |  |
| oId "CUFF.89512.2"; tss_id "TSS61961"; |   |   |   |                                                                         |  |
| chr7 Cufflinks exon100661876 100662230 | . | + | . | gene_id "XLOC_049417"; transcript_id "TCONS_00081468"; exon_number "3"; |  |
| oId "CUFF.89512.2"; tss_id "TSS61961"; |   |   |   |                                                                         |  |
| chr7 Cufflinks exon100660044 100660226 | . | + | . | gene_id "XLOC_049417"; transcript_id "TCONS_00081469"; exon_number "1"; |  |
| oId "CUFF.89512.3"; tss_id "TSS61961"; |   |   |   |                                                                         |  |
| chr7 Cufflinks exon100660856 100660944 | . | + | . | gene_id "XLOC_049417"; transcript_id "TCONS_00081469"; exon_number "2"; |  |
| oId "CUFF.89512.3"; tss_id "TSS61961"; |   |   |   |                                                                         |  |
| chr7 Cufflinks exon100661876 100662230 | . | + | . | gene_id "XLOC_049417"; transcript_id "TCONS_00081469"; exon_number "3"; |  |
| oId "CUFF.89512.3"; tss_id "TSS61961"; |   |   |   |                                                                         |  |
| chr7 Cufflinks exon129631723 129631749 | . | + | . | gene_id "XLOC_049619"; transcript_id "TCONS_00081815"; exon_number "1"; |  |
| oId "CUFF.90483.1"; tss_id "TSS62216"; |   |   |   |                                                                         |  |
| chr7 Cufflinks exon129773313 129775560 | . | + | . | gene_id "XLOC_049619"; transcript_id "TCONS_00081815"; exon_number "2"; |  |
| oId "CUFF.90483.1"; tss_id "TSS62216"; |   |   |   |                                                                         |  |
| chr7 Cufflinks exon134671201 134672747 | . | + | . | gene_id "XLOC_049647"; transcript_id "TCONS_00081867"; exon_number "1"; |  |
| oId "CUFF.90588.1"; tss_id "TSS62253"; |   |   |   |                                                                         |  |
| chr7 Cufflinks exon134674001 134674438 | . | + | . | gene_id "XLOC_049647"; transcript_id "TCONS_00081867"; exon_number "2"; |  |
| oId "CUFF.90588.1"; tss_id "TSS62253"; |   |   |   |                                                                         |  |
| chr7 Cufflinks exon139477937 139478270 | . | + | . | gene_id "XLOC_049692"; transcript_id "TCONS_00081933"; exon_number "1"; |  |
| oId "CUFF.90786.2"; tss_id "TSS62305"; |   |   |   |                                                                         |  |
| chr7 Cufflinks exon139480539 139480623 | . | + | . | gene_id "XLOC_049692"; transcript_id "TCONS_00081933"; exon_number "2"; |  |
| oId "CUFF.90786.2"; tss_id "TSS62305"; |   |   |   |                                                                         |  |
| chr7 Cufflinks exon139482465 139482528 | . | + | . | gene_id "XLOC_049692"; transcript_id "TCONS_00081933"; exon_number "3"; |  |
| oId "CUFF.90786.2"; tss_id "TSS62305"; |   |   |   |                                                                         |  |
| chr7 Cufflinks exon139487137 139487225 | . | + | . | gene_id "XLOC_049692"; transcript_id "TCONS_00081933"; exon_number "4"; |  |
| oId "CUFF.90786.2"; tss_id "TSS62305"; |   |   |   |                                                                         |  |
| chr7 Cufflinks exon139497009 139497285 | . | + | . | gene_id "XLOC_049692"; transcript_id "TCONS_00081933"; exon_number "5"; |  |
| oId "CUFF.90786.2"; tss_id "TSS62305"; |   |   |   |                                                                         |  |



|                                        |           |   |   |   |                                                                         |
|----------------------------------------|-----------|---|---|---|-------------------------------------------------------------------------|
| chr7 Cufflinks exon142015760           | 142015769 | . | + | . | gene_id "XLOC_049728"; transcript_id "TCONS_00081989"; exon_number "1"; |
| oId "CUFF.90935.1"; tss_id "TSS62350"; |           |   |   |   |                                                                         |
| chr7 Cufflinks exon142127993           | 142128042 | . | + | . | gene_id "XLOC_049728"; transcript_id "TCONS_00081989"; exon_number "2"; |
| oId "CUFF.90935.1"; tss_id "TSS62350"; |           |   |   |   |                                                                         |
| chr7 Cufflinks exon142164723           | 142165154 | . | + | . | gene_id "XLOC_049728"; transcript_id "TCONS_00081989"; exon_number "3"; |
| oId "CUFF.90935.1"; tss_id "TSS62350"; |           |   |   |   |                                                                         |
| chr7 Cufflinks exon142107224           | 142108262 | . | + | . | gene_id "XLOC_049728"; transcript_id "TCONS_00082000"; exon_number "1"; |
| oId "CUFF.90935.2"; tss_id "TSS62351"; |           |   |   |   |                                                                         |
| chr7 Cufflinks exon142164997           | 142165154 | . | + | . | gene_id "XLOC_049728"; transcript_id "TCONS_00082000"; exon_number "2"; |
| oId "CUFF.90935.2"; tss_id "TSS62351"; |           |   |   |   |                                                                         |
| chr7 Cufflinks exon142106908           | 142107222 | . | + | . | gene_id "XLOC_049736"; transcript_id "TCONS_00081999"; exon_number "1"; |
| oId "CUFF.90953.1"; tss_id "TSS62359"; |           |   |   |   |                                                                         |
| chr7 Cufflinks exon142127258           | 142127989 | . | + | . | gene_id "XLOC_049736"; transcript_id "TCONS_00081999"; exon_number "2"; |
| oId "CUFF.90953.1"; tss_id "TSS62359"; |           |   |   |   |                                                                         |
| chr7 Cufflinks exon142108263           | 142108542 | . | + | . | gene_id "XLOC_049737"; transcript_id "TCONS_00082001"; exon_number "1"; |
| oId "CUFF.90954.1"; tss_id "TSS62360"; |           |   |   |   |                                                                         |
| chr7 Cufflinks exon142165534           | 142165579 | . | + | . | gene_id "XLOC_049737"; transcript_id "TCONS_00082001"; exon_number "2"; |
| oId "CUFF.90954.1"; tss_id "TSS62360"; |           |   |   |   |                                                                         |
| chr7 Cufflinks exon142110472           | 142110540 | . | + | . | gene_id "XLOC_049738"; transcript_id "TCONS_00082002"; exon_number "1"; |
| oId "CUFF.90955.1"; tss_id "TSS62361"; |           |   |   |   |                                                                         |
| chr7 Cufflinks exon142167538           | 142170849 | . | + | . | gene_id "XLOC_049738"; transcript_id "TCONS_00082002"; exon_number "2"; |
| oId "CUFF.90955.1"; tss_id "TSS62361"; |           |   |   |   |                                                                         |
| chr7 Cufflinks exon142163171           | 142163921 | . | + | . | gene_id "XLOC_049738"; transcript_id "TCONS_00082016"; exon_number "1"; |
| oId "CUFF.90955.3"; tss_id "TSS62362"; |           |   |   |   |                                                                         |
| chr7 Cufflinks exon142165695           | 142170849 | . | + | . | gene_id "XLOC_049738"; transcript_id "TCONS_00082016"; exon_number "2"; |
| oId "CUFF.90955.3"; tss_id "TSS62362"; |           |   |   |   |                                                                         |
| chr7 Cufflinks exon142163171           | 142163921 | . | + | . | gene_id "XLOC_049738"; transcript_id "TCONS_00082015"; exon_number "1"; |
| oId "CUFF.90955.2"; tss_id "TSS62362"; |           |   |   |   |                                                                         |
| chr7 Cufflinks exon142165692           | 142170849 | . | + | . | gene_id "XLOC_049738"; transcript_id "TCONS_00082015"; exon_number "2"; |
| oId "CUFF.90955.2"; tss_id "TSS62362"; |           |   |   |   |                                                                         |
| chr7 Cufflinks exon142131445           | 142131762 | . | + | . | gene_id "XLOC_049745"; transcript_id "TCONS_00082009"; exon_number "1"; |
| oId "CUFF.90972.1"; tss_id "TSS62369"; |           |   |   |   |                                                                         |
| chr7 Cufflinks exon142140913           | 142141140 | . | + | . | gene_id "XLOC_049745"; transcript_id "TCONS_00082009"; exon_number "2"; |
| oId "CUFF.90972.1"; tss_id "TSS62369"; |           |   |   |   |                                                                         |
| chr7 Cufflinks exon142423178           | 142423264 | . | + | . | gene_id "XLOC_049755"; transcript_id "TCONS_00082028"; exon_number "1"; |
| oId "CUFF.91018.1"; tss_id "TSS62385"; |           |   |   |   |                                                                         |
| chr7 Cufflinks exon142423394           | 142423560 | . | + | . | gene_id "XLOC_049755"; transcript_id "TCONS_00082028"; exon_number "2"; |
| oId "CUFF.91018.1"; tss_id "TSS62385"; |           |   |   |   |                                                                         |
| chr7 Cufflinks exon142424898           | 142425007 | . | + | . | gene_id "XLOC_049755"; transcript_id "TCONS_00082028"; exon_number "3"; |
| oId "CUFF.91018.1"; tss_id "TSS62385"; |           |   |   |   |                                                                         |
| chr7 Cufflinks exon142425384           | 142426197 | . | + | . | gene_id "XLOC_049755"; transcript_id "TCONS_00082028"; exon_number "4"; |
| oId "CUFF.91018.1"; tss_id "TSS62385"; |           |   |   |   |                                                                         |
| chr7 Cufflinks exon143060378           | 143060410 | . | + | . | gene_id "XLOC_049771"; transcript_id "TCONS_00082059"; exon_number "1"; |

oId "CUFF.91095.1"; tss\_id "TSS62407";  
chr7 Cufflinks exon143060994 143061316 . + . gene\_id "XLOC\_049771"; transcript\_id "TCONS\_00082059"; exon\_number "2";  
oId "CUFF.91095.1"; tss\_id "TSS62407";  
chr7 Cufflinks exon150078345 150078517 . + . gene\_id "XLOC\_049832"; transcript\_id "TCONS\_00082175"; exon\_number "1";  
oId "CUFF.91403.1"; tss\_id "TSS62492";  
chr7 Cufflinks exon150078715 150078893 . + . gene\_id "XLOC\_049832"; transcript\_id "TCONS\_00082175"; exon\_number "2";  
oId "CUFF.91403.1"; tss\_id "TSS62492";  
chr7 Cufflinks exon150079226 150079433 . + . gene\_id "XLOC\_049833"; transcript\_id "TCONS\_00082176"; exon\_number "1";  
oId "CUFF.91404.1"; tss\_id "TSS62493";  
chr7 Cufflinks exon150079795 150079818 . + . gene\_id "XLOC\_049833"; transcript\_id "TCONS\_00082176"; exon\_number "2";  
oId "CUFF.91404.1"; tss\_id "TSS62493";  
chr7 Cufflinks exon151106247 151106468 . + . gene\_id "XLOC\_049860"; transcript\_id "TCONS\_00082237"; exon\_number "1";  
oId "CUFF.91537.2"; tss\_id "TSS62532";  
chr7 Cufflinks exon151108756 151108878 . + . gene\_id "XLOC\_049860"; transcript\_id "TCONS\_00082237"; exon\_number "2";  
oId "CUFF.91537.2"; tss\_id "TSS62532";  
chr7 Cufflinks exon151109053 151109156 . + . gene\_id "XLOC\_049860"; transcript\_id "TCONS\_00082237"; exon\_number "3";  
oId "CUFF.91537.2"; tss\_id "TSS62532";  
chr7 Cufflinks exon151109805 151110132 . + . gene\_id "XLOC\_049860"; transcript\_id "TCONS\_00082237"; exon\_number "4";  
oId "CUFF.91537.2"; tss\_id "TSS62532";  
chr7 Cufflinks exon1778266 1778974 . - . gene\_id "XLOC\_049986"; transcript\_id "TCONS\_00082416"; exon\_number "1"; oId  
"CUFF.86221.2"; tss\_id "TSS62678";  
chr7 Cufflinks exon1781845 1781946 . - . gene\_id "XLOC\_049986"; transcript\_id "TCONS\_00082416"; exon\_number "2"; oId  
"CUFF.86221.2"; tss\_id "TSS62678";  
chr7 Cufflinks exon1778266 1778838 . - . gene\_id "XLOC\_049986"; transcript\_id "TCONS\_00082415"; exon\_number "1"; oId  
"CUFF.86221.1"; tss\_id "TSS62678";  
chr7 Cufflinks exon1781845 1781946 . - . gene\_id "XLOC\_049986"; transcript\_id "TCONS\_00082415"; exon\_number "2"; oId  
"CUFF.86221.1"; tss\_id "TSS62678";  
chr7 Cufflinks exon5538043 5538987 . - . gene\_id "XLOC\_050027"; transcript\_id "TCONS\_00082485"; exon\_number "1"; oId  
"CUFF.86356.1"; tss\_id "TSS62731";  
chr7 Cufflinks exon5539020 5539185 . - . gene\_id "XLOC\_050027"; transcript\_id "TCONS\_00082485"; exon\_number "2"; oId  
"CUFF.86356.1"; tss\_id "TSS62731";  
chr7 Cufflinks exon23349728 23352079 . - . gene\_id "XLOC\_050132"; transcript\_id "TCONS\_00082686"; exon\_number "1";  
oId "CUFF.86728.6"; tss\_id "TSS62875";  
chr7 Cufflinks exon23352354 23352467 . - . gene\_id "XLOC\_050132"; transcript\_id "TCONS\_00082686"; exon\_number "2";  
oId "CUFF.86728.6"; tss\_id "TSS62875";  
chr7 Cufflinks exon23353088 23353134 . - . gene\_id "XLOC\_050132"; transcript\_id "TCONS\_00082686"; exon\_number "3";  
oId "CUFF.86728.6"; tss\_id "TSS62875";  
chr7 Cufflinks exon30464143 30465326 . - . gene\_id "XLOC\_050236"; transcript\_id "TCONS\_00082848"; exon\_number "1";  
oId "CUFF.87086.3"; tss\_id "TSS63005";  
chr7 Cufflinks exon30465462 30465479 . - . gene\_id "XLOC\_050236"; transcript\_id "TCONS\_00082848"; exon\_number "2";  
oId "CUFF.87086.3"; tss\_id "TSS63005";  
chr7 Cufflinks exon38279177 38279702 . - . gene\_id "XLOC\_050319"; transcript\_id "TCONS\_00082973"; exon\_number "1";  
oId "CUFF.87395.1"; tss\_id "TSS63107";

|                                        |           |   |   |   |                                                                         |
|----------------------------------------|-----------|---|---|---|-------------------------------------------------------------------------|
| chr7 Cufflinks exon38281289            | 38281321  | . | - | . | gene_id "XLOC_050319"; transcript_id "TCONS_00082973"; exon_number "2"; |
| oId "CUFF.87395.1"; tss_id "TSS63107"; |           |   |   |   |                                                                         |
| chr7 Cufflinks exon38292495            | 38292676  | . | - | . | gene_id "XLOC_050319"; transcript_id "TCONS_00082981"; exon_number "1"; |
| oId "CUFF.87395.8"; tss_id "TSS63112"; |           |   |   |   |                                                                         |
| chr7 Cufflinks exon38308789            | 38308885  | . | - | . | gene_id "XLOC_050319"; transcript_id "TCONS_00082981"; exon_number "2"; |
| oId "CUFF.87395.8"; tss_id "TSS63112"; |           |   |   |   |                                                                         |
| chr7 Cufflinks exon77646374            | 77649293  | . | - | . | gene_id "XLOC_050612"; transcript_id "TCONS_00083514"; exon_number "1"; |
| oId "CUFF.88778.1"; tss_id "TSS63499"; |           |   |   |   |                                                                         |
| chr7 Cufflinks exon77649515            | 77649627  | . | - | . | gene_id "XLOC_050612"; transcript_id "TCONS_00083514"; exon_number "2"; |
| oId "CUFF.88778.1"; tss_id "TSS63499"; |           |   |   |   |                                                                         |
| chr7 Cufflinks exon92234235            | 92244600  | . | - | . | gene_id "XLOC_050678"; transcript_id "TCONS_00083617"; exon_number "1"; |
| oId "CUFF.89016.5"; tss_id "TSS63575"; |           |   |   |   |                                                                         |
| chr7 Cufflinks exon92247386            | 92247521  | . | - | . | gene_id "XLOC_050678"; transcript_id "TCONS_00083617"; exon_number "2"; |
| oId "CUFF.89016.5"; tss_id "TSS63575"; |           |   |   |   |                                                                         |
| chr7 Cufflinks exon92252350            | 92252400  | . | - | . | gene_id "XLOC_050678"; transcript_id "TCONS_00083617"; exon_number "3"; |
| oId "CUFF.89016.5"; tss_id "TSS63575"; |           |   |   |   |                                                                         |
| chr7 Cufflinks exon92253799            | 92253827  | . | - | . | gene_id "XLOC_050678"; transcript_id "TCONS_00083617"; exon_number "4"; |
| oId "CUFF.89016.5"; tss_id "TSS63575"; |           |   |   |   |                                                                         |
| chr7 Cufflinks exon100657450           | 100657530 | . | - | . | gene_id "XLOC_050789"; transcript_id "TCONS_00083813"; exon_number "1"; |
| oId "CUFF.89513.1"; tss_id "TSS63718"; |           |   |   |   |                                                                         |
| chr7 Cufflinks exon100657635           | 100657720 | . | - | . | gene_id "XLOC_050789"; transcript_id "TCONS_00083813"; exon_number "2"; |
| oId "CUFF.89513.1"; tss_id "TSS63718"; |           |   |   |   |                                                                         |
| chr7 Cufflinks exon100658479           | 100658548 | . | - | . | gene_id "XLOC_050789"; transcript_id "TCONS_00083813"; exon_number "3"; |
| oId "CUFF.89513.1"; tss_id "TSS63718"; |           |   |   |   |                                                                         |
| chr7 Cufflinks exon100660696           | 100660944 | . | - | . | gene_id "XLOC_050789"; transcript_id "TCONS_00083813"; exon_number "4"; |
| oId "CUFF.89513.1"; tss_id "TSS63718"; |           |   |   |   |                                                                         |
| chr7 Cufflinks exon105733802           | 105734000 | . | - | . | gene_id "XLOC_050870"; transcript_id "TCONS_00083937"; exon_number "1"; |
| oId "CUFF.89857.1"; tss_id "TSS63814"; |           |   |   |   |                                                                         |
| chr7 Cufflinks exon105734339           | 105734445 | . | - | . | gene_id "XLOC_050870"; transcript_id "TCONS_00083937"; exon_number "2"; |
| oId "CUFF.89857.1"; tss_id "TSS63814"; |           |   |   |   |                                                                         |
| chr7 Cufflinks exon110720639           | 110722576 | . | - | . | gene_id "XLOC_050937"; transcript_id "TCONS_00084018"; exon_number "1"; |
| oId "CUFF.90041.1"; tss_id "TSS63885"; |           |   |   |   |                                                                         |
| chr7 Cufflinks exon110736637           | 110737510 | . | - | . | gene_id "XLOC_050937"; transcript_id "TCONS_00084018"; exon_number "2"; |
| oId "CUFF.90041.1"; tss_id "TSS63885"; |           |   |   |   |                                                                         |
| chr7 Cufflinks exon110893075           | 110895737 | . | - | . | gene_id "XLOC_050958"; transcript_id "TCONS_00084040"; exon_number "1"; |
| oId "CUFF.90072.1"; tss_id "TSS63907"; |           |   |   |   |                                                                         |
| chr7 Cufflinks exon110969450           | 110970803 | . | - | . | gene_id "XLOC_050958"; transcript_id "TCONS_00084040"; exon_number "2"; |
| oId "CUFF.90072.1"; tss_id "TSS63907"; |           |   |   |   |                                                                         |
| chr7 Cufflinks exon117350706           | 117351836 | . | - | . | gene_id "XLOC_051032"; transcript_id "TCONS_00084137"; exon_number "1"; |
| oId "CUFF.90240.2"; tss_id "TSS63991"; |           |   |   |   |                                                                         |
| chr7 Cufflinks exon117355792           | 117355943 | . | - | . | gene_id "XLOC_051032"; transcript_id "TCONS_00084137"; exon_number "2"; |
| oId "CUFF.90240.2"; tss_id "TSS63991"; |           |   |   |   |                                                                         |
| chr7 Cufflinks exon133161387           | 133165263 | . | - | . | gene_id "XLOC_051136"; transcript_id "TCONS_00084315"; exon_number "1"; |

|                                        |   |   |   |                                                                         |  |
|----------------------------------------|---|---|---|-------------------------------------------------------------------------|--|
| oId "CUFF.90551.1"; tss_id "TSS64121"; |   |   |   |                                                                         |  |
| chr7 Cufflinks exon133168562 133169133 | . | - | . | gene_id "XLOC_051136"; transcript_id "TCONS_00084315"; exon_number "2"; |  |
| oId "CUFF.90551.1"; tss_id "TSS64121"; |   |   |   |                                                                         |  |
| chr7 Cufflinks exon139469698 139469935 | . | - | . | gene_id "XLOC_051192"; transcript_id "TCONS_00084419"; exon_number "1"; |  |
| oId "CUFF.90784.1"; tss_id "TSS64200"; |   |   |   |                                                                         |  |
| chr7 Cufflinks exon139470334 139470419 | . | - | . | gene_id "XLOC_051192"; transcript_id "TCONS_00084419"; exon_number "2"; |  |
| oId "CUFF.90784.1"; tss_id "TSS64200"; |   |   |   |                                                                         |  |
| chr7 Cufflinks exon139473171 139473403 | . | - | . | gene_id "XLOC_051193"; transcript_id "TCONS_00084420"; exon_number "1"; |  |
| oId "CUFF.90785.1"; tss_id "TSS64201"; |   |   |   |                                                                         |  |
| chr7 Cufflinks exon139474253 139474512 | . | - | . | gene_id "XLOC_051193"; transcript_id "TCONS_00084420"; exon_number "2"; |  |
| oId "CUFF.90785.1"; tss_id "TSS64201"; |   |   |   |                                                                         |  |
| chr7 Cufflinks exon140419135 140426316 | . | - | . | gene_id "XLOC_051218"; transcript_id "TCONS_00084461"; exon_number "1"; |  |
| oId "CUFF.90865.3"; tss_id "TSS64234"; |   |   |   |                                                                         |  |
| chr7 Cufflinks exon140426924 140428236 | . | - | . | gene_id "XLOC_051218"; transcript_id "TCONS_00084461"; exon_number "2"; |  |
| oId "CUFF.90865.3"; tss_id "TSS64234"; |   |   |   |                                                                         |  |
| chr7 Cufflinks exon142031045 142031179 | . | - | . | gene_id "XLOC_051238"; transcript_id "TCONS_00084486"; exon_number "1"; |  |
| oId "CUFF.90941.1"; tss_id "TSS64258"; |   |   |   |                                                                         |  |
| chr7 Cufflinks exon142035061 142036643 | . | - | . | gene_id "XLOC_051238"; transcript_id "TCONS_00084486"; exon_number "2"; |  |
| oId "CUFF.90941.1"; tss_id "TSS64258"; |   |   |   |                                                                         |  |
| chr7 Cufflinks exon142042205 142045021 | . | - | . | gene_id "XLOC_051240"; transcript_id "TCONS_00084488"; exon_number "1"; |  |
| oId "CUFF.90948.1"; tss_id "TSS64260"; |   |   |   |                                                                         |  |
| chr7 Cufflinks exon142045726 142045790 | . | - | . | gene_id "XLOC_051240"; transcript_id "TCONS_00084488"; exon_number "2"; |  |
| oId "CUFF.90948.1"; tss_id "TSS64260"; |   |   |   |                                                                         |  |
| chr7 Cufflinks exon142042205 142045021 | . | - | . | gene_id "XLOC_051240"; transcript_id "TCONS_00084489"; exon_number "1"; |  |
| oId "CUFF.90948.2"; tss_id "TSS64260"; |   |   |   |                                                                         |  |
| chr7 Cufflinks exon142045318 142045559 | . | - | . | gene_id "XLOC_051240"; transcript_id "TCONS_00084489"; exon_number "2"; |  |
| oId "CUFF.90948.2"; tss_id "TSS64260"; |   |   |   |                                                                         |  |
| chr7 Cufflinks exon142045726 142045801 | . | - | . | gene_id "XLOC_051240"; transcript_id "TCONS_00084489"; exon_number "3"; |  |
| oId "CUFF.90948.2"; tss_id "TSS64260"; |   |   |   |                                                                         |  |
| chr7 Cufflinks exon142124361 142124428 | . | - | . | gene_id "XLOC_051245"; transcript_id "TCONS_00084496"; exon_number "1"; |  |
| oId "CUFF.90967.1"; tss_id "TSS64269"; |   |   |   |                                                                         |  |
| chr7 Cufflinks exon142124517 142124747 | . | - | . | gene_id "XLOC_051245"; transcript_id "TCONS_00084496"; exon_number "2"; |  |
| oId "CUFF.90967.1"; tss_id "TSS64269"; |   |   |   |                                                                         |  |
| chr8 Cufflinks exon48646310 48646836   | . | + | . | gene_id "XLOC_051950"; transcript_id "TCONS_00085590"; exon_number "1"; |  |
| oId "CUFF.93247.1"; tss_id "TSS65137"; |   |   |   |                                                                         |  |
| chr8 Cufflinks exon48646891 48647677   | . | + | . | gene_id "XLOC_051950"; transcript_id "TCONS_00085590"; exon_number "2"; |  |
| oId "CUFF.93247.1"; tss_id "TSS65137"; |   |   |   |                                                                         |  |
| chr8 Cufflinks exon48647700 48647866   | . | + | . | gene_id "XLOC_051950"; transcript_id "TCONS_00085590"; exon_number "3"; |  |
| oId "CUFF.93247.1"; tss_id "TSS65137"; |   |   |   |                                                                         |  |
| chr8 Cufflinks exon57124197 57124396   | . | + | . | gene_id "XLOC_051989"; transcript_id "TCONS_00085640"; exon_number "1"; |  |
| oId "CUFF.93430.3"; tss_id "TSS65179"; |   |   |   |                                                                         |  |
| chr8 Cufflinks exon57127157 57127226   | . | + | . | gene_id "XLOC_051989"; transcript_id "TCONS_00085640"; exon_number "2"; |  |
| oId "CUFF.93430.3"; tss_id "TSS65179"; |   |   |   |                                                                         |  |

|                                        |           |   |   |   |                                                                         |
|----------------------------------------|-----------|---|---|---|-------------------------------------------------------------------------|
| chr8 Cufflinks exon57128948            | 57129090  | . | + | . | gene_id "XLOC_051989"; transcript_id "TCONS_00085640"; exon_number "3"; |
| oId "CUFF.93430.3"; tss_id "TSS65179"; |           |   |   |   |                                                                         |
| chr8 Cufflinks exon57129890            | 57131357  | . | + | . | gene_id "XLOC_051989"; transcript_id "TCONS_00085640"; exon_number "4"; |
| oId "CUFF.93430.3"; tss_id "TSS65179"; |           |   |   |   |                                                                         |
| chr8 Cufflinks exon57124197            | 57124396  | . | + | . | gene_id "XLOC_051989"; transcript_id "TCONS_00085641"; exon_number "1"; |
| oId "CUFF.93430.4"; tss_id "TSS65179"; |           |   |   |   |                                                                         |
| chr8 Cufflinks exon57127157            | 57127226  | . | + | . | gene_id "XLOC_051989"; transcript_id "TCONS_00085641"; exon_number "2"; |
| oId "CUFF.93430.4"; tss_id "TSS65179"; |           |   |   |   |                                                                         |
| chr8 Cufflinks exon57128992            | 57129090  | . | + | . | gene_id "XLOC_051989"; transcript_id "TCONS_00085641"; exon_number "3"; |
| oId "CUFF.93430.4"; tss_id "TSS65179"; |           |   |   |   |                                                                         |
| chr8 Cufflinks exon57129890            | 57131357  | . | + | . | gene_id "XLOC_051989"; transcript_id "TCONS_00085641"; exon_number "4"; |
| oId "CUFF.93430.4"; tss_id "TSS65179"; |           |   |   |   |                                                                         |
| chr8 Cufflinks exon57124197            | 57124396  | . | + | . | gene_id "XLOC_051989"; transcript_id "TCONS_00085639"; exon_number "1"; |
| oId "CUFF.93430.2"; tss_id "TSS65179"; |           |   |   |   |                                                                         |
| chr8 Cufflinks exon57125321            | 57125448  | . | + | . | gene_id "XLOC_051989"; transcript_id "TCONS_00085639"; exon_number "2"; |
| oId "CUFF.93430.2"; tss_id "TSS65179"; |           |   |   |   |                                                                         |
| chr8 Cufflinks exon57127157            | 57127226  | . | + | . | gene_id "XLOC_051989"; transcript_id "TCONS_00085639"; exon_number "3"; |
| oId "CUFF.93430.2"; tss_id "TSS65179"; |           |   |   |   |                                                                         |
| chr8 Cufflinks exon57128992            | 57129090  | . | + | . | gene_id "XLOC_051989"; transcript_id "TCONS_00085639"; exon_number "4"; |
| oId "CUFF.93430.2"; tss_id "TSS65179"; |           |   |   |   |                                                                         |
| chr8 Cufflinks exon57129890            | 57131357  | . | + | . | gene_id "XLOC_051989"; transcript_id "TCONS_00085639"; exon_number "5"; |
| oId "CUFF.93430.2"; tss_id "TSS65179"; |           |   |   |   |                                                                         |
| chr8 Cufflinks exon79625696            | 79626934  | . | + | . | gene_id "XLOC_052163"; transcript_id "TCONS_00085885"; exon_number "1"; |
| oId "CUFF.93975.4"; tss_id "TSS65384"; |           |   |   |   |                                                                         |
| chr8 Cufflinks exon79627456            | 79627563  | . | + | . | gene_id "XLOC_052163"; transcript_id "TCONS_00085885"; exon_number "2"; |
| oId "CUFF.93975.4"; tss_id "TSS65384"; |           |   |   |   |                                                                         |
| chr8 Cufflinks exon79629563            | 79632049  | . | + | . | gene_id "XLOC_052163"; transcript_id "TCONS_00085885"; exon_number "3"; |
| oId "CUFF.93975.4"; tss_id "TSS65384"; |           |   |   |   |                                                                         |
| chr8 Cufflinks exon121737339           | 121737388 | . | + | . | gene_id "XLOC_052424"; transcript_id "TCONS_00086271"; exon_number "1"; |
| oId "CUFF.94953.2"; tss_id "TSS65691"; |           |   |   |   |                                                                         |
| chr8 Cufflinks exon121754720           | 121754807 | . | + | . | gene_id "XLOC_052424"; transcript_id "TCONS_00086271"; exon_number "2"; |
| oId "CUFF.94953.2"; tss_id "TSS65691"; |           |   |   |   |                                                                         |
| chr8 Cufflinks exon121787515           | 121787766 | . | + | . | gene_id "XLOC_052424"; transcript_id "TCONS_00086271"; exon_number "3"; |
| oId "CUFF.94953.2"; tss_id "TSS65691"; |           |   |   |   |                                                                         |
| chr8 Cufflinks exon121788599           | 121789077 | . | + | . | gene_id "XLOC_052424"; transcript_id "TCONS_00086271"; exon_number "4"; |
| oId "CUFF.94953.2"; tss_id "TSS65691"; |           |   |   |   |                                                                         |
| chr8 Cufflinks exon121743632           | 121743953 | . | + | . | gene_id "XLOC_052424"; transcript_id "TCONS_00086272"; exon_number "1"; |
| oId "CUFF.94953.3"; tss_id "TSS65692"; |           |   |   |   |                                                                         |
| chr8 Cufflinks exon121754720           | 121754807 | . | + | . | gene_id "XLOC_052424"; transcript_id "TCONS_00086272"; exon_number "2"; |
| oId "CUFF.94953.3"; tss_id "TSS65692"; |           |   |   |   |                                                                         |
| chr8 Cufflinks exon121768288           | 121768473 | . | + | . | gene_id "XLOC_052424"; transcript_id "TCONS_00086272"; exon_number "3"; |
| oId "CUFF.94953.3"; tss_id "TSS65692"; |           |   |   |   |                                                                         |
| chr8 Cufflinks exon121773493           | 121773612 | . | + | . | gene_id "XLOC_052424"; transcript_id "TCONS_00086273"; exon_number "1"; |

oId "CUFF.94953.4"; tss\_id "TSS65693";  
chr8 Cufflinks exon121778018 121778104 . + . gene\_id "XLOC\_052424"; transcript\_id "TCONS\_00086273"; exon\_number "2";  
oId "CUFF.94953.4"; tss\_id "TSS65693";  
chr8 Cufflinks exon121780899 121781938 . + . gene\_id "XLOC\_052424"; transcript\_id "TCONS\_00086273"; exon\_number "3";  
oId "CUFF.94953.4"; tss\_id "TSS65693";  
chr8 Cufflinks exon121787515 121787766 . + . gene\_id "XLOC\_052424"; transcript\_id "TCONS\_00086273"; exon\_number "4";  
oId "CUFF.94953.4"; tss\_id "TSS65693";  
chr8 Cufflinks exon121788599 121789077 . + . gene\_id "XLOC\_052424"; transcript\_id "TCONS\_00086273"; exon\_number "5";  
oId "CUFF.94953.4"; tss\_id "TSS65693";  
chr8 Cufflinks exon133013124 133013148 . + . gene\_id "XLOC\_052481"; transcript\_id "TCONS\_00086372"; exon\_number "1";  
oId "CUFF.95469.3"; tss\_id "TSS65769";  
chr8 Cufflinks exon133014006 133014054 . + . gene\_id "XLOC\_052481"; transcript\_id "TCONS\_00086372"; exon\_number "2";  
oId "CUFF.95469.3"; tss\_id "TSS65769";  
chr8 Cufflinks exon133014850 133014953 . + . gene\_id "XLOC\_052481"; transcript\_id "TCONS\_00086372"; exon\_number "3";  
oId "CUFF.95469.3"; tss\_id "TSS65769";  
chr8 Cufflinks exon133015483 133015532 . + . gene\_id "XLOC\_052481"; transcript\_id "TCONS\_00086372"; exon\_number "4";  
oId "CUFF.95469.3"; tss\_id "TSS65769";  
chr8 Cufflinks exon133023037 133025886 . + . gene\_id "XLOC\_052481"; transcript\_id "TCONS\_00086372"; exon\_number "5";  
oId "CUFF.95469.3"; tss\_id "TSS65769";  
chr8 Cufflinks exon12039565 12040498 . - . gene\_id "XLOC\_052782"; transcript\_id "TCONS\_00086830"; exon\_number "1";  
oId "CUFF.92420.2"; tss\_id "TSS66137";  
chr8 Cufflinks exon12282600 12282840 . - . gene\_id "XLOC\_052782"; transcript\_id "TCONS\_00086830"; exon\_number "2";  
oId "CUFF.92420.2"; tss\_id "TSS66137";  
chr8 Cufflinks exon52762369 52762646 . - . gene\_id "XLOC\_053027"; transcript\_id "TCONS\_00087262"; exon\_number "1";  
oId "CUFF.93288.1"; tss\_id "TSS66465";  
chr8 Cufflinks exon52770053 52770079 . - . gene\_id "XLOC\_053027"; transcript\_id "TCONS\_00087262"; exon\_number "2";  
oId "CUFF.93288.1"; tss\_id "TSS66465";  
chr8 Cufflinks exon91968559 91971258 . - . gene\_id "XLOC\_053250"; transcript\_id "TCONS\_00087616"; exon\_number "1";  
oId "CUFF.94168.3"; tss\_id "TSS66739";  
chr8 Cufflinks exon91972970 91973076 . - . gene\_id "XLOC\_053250"; transcript\_id "TCONS\_00087616"; exon\_number "2";  
oId "CUFF.94168.3"; tss\_id "TSS66739";  
chr8 Cufflinks exon91983294 91983369 . - . gene\_id "XLOC\_053250"; transcript\_id "TCONS\_00087616"; exon\_number "3";  
oId "CUFF.94168.3"; tss\_id "TSS66739";  
chr8 Cufflinks exon91992591 91992689 . - . gene\_id "XLOC\_053250"; transcript\_id "TCONS\_00087616"; exon\_number "4";  
oId "CUFF.94168.3"; tss\_id "TSS66739";  
chr8 Cufflinks exon91997342 91997485 . - . gene\_id "XLOC\_053250"; transcript\_id "TCONS\_00087616"; exon\_number "5";  
oId "CUFF.94168.3"; tss\_id "TSS66739";  
chr8 Cufflinks exon102698749 102701634 . - . gene\_id "XLOC\_053354"; transcript\_id "TCONS\_00087787"; exon\_number "1";  
oId "CUFF.94537.2"; tss\_id "TSS66867";  
chr8 Cufflinks exon102701769 102701851 . - . gene\_id "XLOC\_053354"; transcript\_id "TCONS\_00087787"; exon\_number "2";  
oId "CUFF.94537.2"; tss\_id "TSS66867";  
chr8 Cufflinks exon104168603 104169266 . - . gene\_id "XLOC\_053364"; transcript\_id "TCONS\_00087816"; exon\_number "1";  
oId "CUFF.94607.4"; tss\_id "TSS66890";

|                                        |           |   |   |   |                                                                             |
|----------------------------------------|-----------|---|---|---|-----------------------------------------------------------------------------|
| chr8 Cufflinks exon104178053           | 104178524 | . | - | . | gene_id "XLOC_053364"; transcript_id "TCONS_00087816"; exon_number "2";     |
| oId "CUFF.94607.4"; tss_id "TSS66890"; |           |   |   |   |                                                                             |
| chr8 Cufflinks exon104184164           | 104184368 | . | - | . | gene_id "XLOC_053364"; transcript_id "TCONS_00087816"; exon_number "3";     |
| oId "CUFF.94607.4"; tss_id "TSS66890"; |           |   |   |   |                                                                             |
| chr8 Cufflinks exon118937477           | 118937595 | . | - | . | gene_id "XLOC_053432"; transcript_id "TCONS_00087920"; exon_number "1";     |
| oId "CUFF.94914.1"; tss_id "TSS66980"; |           |   |   |   |                                                                             |
| chr8 Cufflinks exon118948224           | 118948362 | . | - | . | gene_id "XLOC_053432"; transcript_id "TCONS_00087920"; exon_number "2";     |
| oId "CUFF.94914.1"; tss_id "TSS66980"; |           |   |   |   |                                                                             |
| chr8 Cufflinks exon119084837           | 119085016 | . | - | . | gene_id "XLOC_053432"; transcript_id "TCONS_00087920"; exon_number "3";     |
| oId "CUFF.94914.1"; tss_id "TSS66980"; |           |   |   |   |                                                                             |
| chr8 Cufflinks exon119092988           | 119093869 | . | - | . | gene_id "XLOC_053432"; transcript_id "TCONS_00087920"; exon_number "4";     |
| oId "CUFF.94914.1"; tss_id "TSS66980"; |           |   |   |   |                                                                             |
| chr8 Cufflinks exon119092729           | 119092740 | . | - | . | gene_id "XLOC_053432"; transcript_id "TCONS_00087921"; exon_number "1";     |
| oId "CUFF.94914.2"; tss_id "TSS66980"; |           |   |   |   |                                                                             |
| chr8 Cufflinks exon119092988           | 119093869 | . | - | . | gene_id "XLOC_053432"; transcript_id "TCONS_00087921"; exon_number "2";     |
| oId "CUFF.94914.2"; tss_id "TSS66980"; |           |   |   |   |                                                                             |
| chr8 Cufflinks exon119201695           | 119209971 | . | - | . | gene_id "XLOC_053435"; transcript_id "TCONS_00087924"; exon_number "1";     |
| oId "CUFF.94918.2"; tss_id "TSS66983"; |           |   |   |   |                                                                             |
| chr8 Cufflinks exon119251954           | 119252214 | . | - | . | gene_id "XLOC_053435"; transcript_id "TCONS_00087924"; exon_number "2";     |
| oId "CUFF.94918.2"; tss_id "TSS66983"; |           |   |   |   |                                                                             |
| chr8 Cufflinks exon119253391           | 119253762 | . | - | . | gene_id "XLOC_053435"; transcript_id "TCONS_00087924"; exon_number "3";     |
| oId "CUFF.94918.2"; tss_id "TSS66983"; |           |   |   |   |                                                                             |
| chr8 Cufflinks exon140910799           | 140911042 | . | - | . | gene_id "XLOC_053639"; transcript_id "TCONS_00088200"; exon_number "1";     |
| oId "CUFF.95537.1"; tss_id "TSS67215"; |           |   |   |   |                                                                             |
| chr8 Cufflinks exon141192427           | 141192445 | . | - | . | gene_id "XLOC_053639"; transcript_id "TCONS_00088200"; exon_number "2";     |
| oId "CUFF.95537.1"; tss_id "TSS67215"; |           |   |   |   |                                                                             |
| chr8 Cufflinks exon142247885           | 142247976 | . | - | . | gene_id "XLOC_053650"; transcript_id "TCONS_00088236"; exon_number "1";     |
| oId "CUFF.95569.1"; tss_id "TSS67238"; |           |   |   |   |                                                                             |
| chr8 Cufflinks exon142249119           | 142249434 | . | - | . | gene_id "XLOC_053650"; transcript_id "TCONS_00088236"; exon_number "2";     |
| oId "CUFF.95569.1"; tss_id "TSS67238"; |           |   |   |   |                                                                             |
| chr8 Cufflinks exon144521783           | 144522046 | . | - | . | gene_id "XLOC_053675"; transcript_id "TCONS_00088276"; exon_number "1";     |
| oId "CUFF.95691.1"; tss_id "TSS67271"; |           |   |   |   |                                                                             |
| chr8 Cufflinks exon144522157           | 144522202 | . | - | . | gene_id "XLOC_053675"; transcript_id "TCONS_00088276"; exon_number "2";     |
| oId "CUFF.95691.1"; tss_id "TSS67271"; |           |   |   |   |                                                                             |
| chr8 Cufflinks exon145310807           | 145311287 | . | - | . | gene_id "XLOC_053704"; transcript_id "TCONS_00088340"; exon_number "1";     |
| oId "CUFF.95774.1"; tss_id "TSS67314"; |           |   |   |   |                                                                             |
| chr8 Cufflinks exon145311343           | 145311402 | . | - | . | gene_id "XLOC_053704"; transcript_id "TCONS_00088340"; exon_number "2";     |
| oId "CUFF.95774.1"; tss_id "TSS67314"; |           |   |   |   |                                                                             |
| chr9 Cufflinks exon8858018             | 8858323   | . | + | . | gene_id "XLOC_053837"; transcript_id "TCONS_00088562"; exon_number "1"; oId |
| "CUFF.96283.2"; tss_id "TSS67487";     |           |   |   |   |                                                                             |
| chr9 Cufflinks exon8859956             | 8860037   | . | + | . | gene_id "XLOC_053837"; transcript_id "TCONS_00088562"; exon_number "2"; oId |
| "CUFF.96283.2"; tss_id "TSS67487";     |           |   |   |   |                                                                             |
| chr9 Cufflinks exon8860782             | 8861727   | . | + | . | gene_id "XLOC_053837"; transcript_id "TCONS_00088562"; exon_number "3"; oId |

|                                                                                  |                                                                                                                   |
|----------------------------------------------------------------------------------|-------------------------------------------------------------------------------------------------------------------|
| "CUFF.96283.2"; tss_id "TSS67487";<br>chr9 Cufflinks exon8858018 8858323 . + .   | gene_id "XLOC_053837"; transcript_id "TCONS_00088561"; exon_number "1"; oId                                       |
| "CUFF.96283.1"; tss_id "TSS67487";<br>chr9 Cufflinks exon8860782 8861727 . + .   | gene_id "XLOC_053837"; transcript_id "TCONS_00088561"; exon_number "2"; oId                                       |
| "CUFF.96283.1"; tss_id "TSS67487";<br>chr9 Cufflinks exon37984813 37984877 . + . | gene_id "XLOC_054081"; transcript_id "TCONS_00088910"; exon_number "1";<br>oId "CUFF.97192.1"; tss_id "TSS67759"; |
| chr9 Cufflinks exon37985077 37990161 . + .                                       | gene_id "XLOC_054081"; transcript_id "TCONS_00088910"; exon_number "2";<br>oId "CUFF.97192.1"; tss_id "TSS67759"; |
| chr9 Cufflinks exon68726202 68726979 . + .                                       | gene_id "XLOC_054162"; transcript_id "TCONS_00089015"; exon_number "1";<br>oId "CUFF.97570.4"; tss_id "TSS67849"; |
| chr9 Cufflinks exon68728837 68728906 . + .                                       | gene_id "XLOC_054162"; transcript_id "TCONS_00089015"; exon_number "2";<br>oId "CUFF.97570.4"; tss_id "TSS67849"; |
| chr9 Cufflinks exon68743105 68743230 . + .                                       | gene_id "XLOC_054162"; transcript_id "TCONS_00089015"; exon_number "3";<br>oId "CUFF.97570.4"; tss_id "TSS67849"; |
| chr9 Cufflinks exon68745854 68745969 . + .                                       | gene_id "XLOC_054162"; transcript_id "TCONS_00089015"; exon_number "4";<br>oId "CUFF.97570.4"; tss_id "TSS67849"; |
| chr9 Cufflinks exon68748020 68748376 . + .                                       | gene_id "XLOC_054162"; transcript_id "TCONS_00089015"; exon_number "5";<br>oId "CUFF.97570.4"; tss_id "TSS67849"; |
| chr9 Cufflinks exon68726202 68726683 . + .                                       | gene_id "XLOC_054162"; transcript_id "TCONS_00089014"; exon_number "1";<br>oId "CUFF.97570.3"; tss_id "TSS67849"; |
| chr9 Cufflinks exon68728837 68728906 . + .                                       | gene_id "XLOC_054162"; transcript_id "TCONS_00089014"; exon_number "2";<br>oId "CUFF.97570.3"; tss_id "TSS67849"; |
| chr9 Cufflinks exon68743105 68743230 . + .                                       | gene_id "XLOC_054162"; transcript_id "TCONS_00089014"; exon_number "3";<br>oId "CUFF.97570.3"; tss_id "TSS67849"; |
| chr9 Cufflinks exon68745854 68745967 . + .                                       | gene_id "XLOC_054162"; transcript_id "TCONS_00089014"; exon_number "4";<br>oId "CUFF.97570.3"; tss_id "TSS67849"; |
| chr9 Cufflinks exon68748018 68748376 . + .                                       | gene_id "XLOC_054162"; transcript_id "TCONS_00089014"; exon_number "5";<br>oId "CUFF.97570.3"; tss_id "TSS67849"; |
| chr9 Cufflinks exon68726202 68726695 . + .                                       | gene_id "XLOC_054162"; transcript_id "TCONS_00089013"; exon_number "1";<br>oId "CUFF.97570.2"; tss_id "TSS67849"; |
| chr9 Cufflinks exon68728841 68728906 . + .                                       | gene_id "XLOC_054162"; transcript_id "TCONS_00089013"; exon_number "2";<br>oId "CUFF.97570.2"; tss_id "TSS67849"; |
| chr9 Cufflinks exon68743105 68743230 . + .                                       | gene_id "XLOC_054162"; transcript_id "TCONS_00089013"; exon_number "3";<br>oId "CUFF.97570.2"; tss_id "TSS67849"; |
| chr9 Cufflinks exon68745854 68745967 . + .                                       | gene_id "XLOC_054162"; transcript_id "TCONS_00089013"; exon_number "4";<br>oId "CUFF.97570.2"; tss_id "TSS67849"; |
| chr9 Cufflinks exon68748018 68748376 . + .                                       | gene_id "XLOC_054162"; transcript_id "TCONS_00089013"; exon_number "5";<br>oId "CUFF.97570.2"; tss_id "TSS67849"; |
| chr9 Cufflinks exon68726455 68726683 . + .                                       | gene_id "XLOC_054162"; transcript_id "TCONS_00089019"; exon_number "1";<br>oId "CUFF.97570.7"; tss_id "TSS67850"; |
| chr9 Cufflinks exon68727457 68727638 . + .                                       | gene_id "XLOC_054162"; transcript_id "TCONS_00089019"; exon_number "2";<br>oId "CUFF.97570.7"; tss_id "TSS67850"; |



|                                        |          |   |   |   |                                                                         |
|----------------------------------------|----------|---|---|---|-------------------------------------------------------------------------|
| chr9 Cufflinks exon68728837            | 68728906 | . | + | . | gene_id "XLOC_054162"; transcript_id "TCONS_00089019"; exon_number "3"; |
| oId "CUFF.97570.7"; tss_id "TSS67850"; |          |   |   |   |                                                                         |
| chr9 Cufflinks exon68743105            | 68743230 | . | + | . | gene_id "XLOC_054162"; transcript_id "TCONS_00089019"; exon_number "4"; |
| oId "CUFF.97570.7"; tss_id "TSS67850"; |          |   |   |   |                                                                         |
| chr9 Cufflinks exon68745854            | 68745967 | . | + | . | gene_id "XLOC_054162"; transcript_id "TCONS_00089019"; exon_number "5"; |
| oId "CUFF.97570.7"; tss_id "TSS67850"; |          |   |   |   |                                                                         |
| chr9 Cufflinks exon68748018            | 68748376 | . | + | . | gene_id "XLOC_054162"; transcript_id "TCONS_00089019"; exon_number "6"; |
| oId "CUFF.97570.7"; tss_id "TSS67850"; |          |   |   |   |                                                                         |
| chr9 Cufflinks exon68726541            | 68726979 | . | + | . | gene_id "XLOC_054162"; transcript_id "TCONS_00089020"; exon_number "1"; |
| oId "CUFF.97570.8"; tss_id "TSS67850"; |          |   |   |   |                                                                         |
| chr9 Cufflinks exon68727457            | 68727638 | . | + | . | gene_id "XLOC_054162"; transcript_id "TCONS_00089020"; exon_number "2"; |
| oId "CUFF.97570.8"; tss_id "TSS67850"; |          |   |   |   |                                                                         |
| chr9 Cufflinks exon68728837            | 68728906 | . | + | . | gene_id "XLOC_054162"; transcript_id "TCONS_00089020"; exon_number "3"; |
| oId "CUFF.97570.8"; tss_id "TSS67850"; |          |   |   |   |                                                                         |
| chr9 Cufflinks exon68743105            | 68743230 | . | + | . | gene_id "XLOC_054162"; transcript_id "TCONS_00089020"; exon_number "4"; |
| oId "CUFF.97570.8"; tss_id "TSS67850"; |          |   |   |   |                                                                         |
| chr9 Cufflinks exon68745854            | 68745967 | . | + | . | gene_id "XLOC_054162"; transcript_id "TCONS_00089020"; exon_number "5"; |
| oId "CUFF.97570.8"; tss_id "TSS67850"; |          |   |   |   |                                                                         |
| chr9 Cufflinks exon68748018            | 68748376 | . | + | . | gene_id "XLOC_054162"; transcript_id "TCONS_00089020"; exon_number "6"; |
| oId "CUFF.97570.8"; tss_id "TSS67850"; |          |   |   |   |                                                                         |
| chr9 Cufflinks exon95858405            | 95858634 | . | + | . | gene_id "XLOC_054413"; transcript_id "TCONS_00089408"; exon_number "1"; |
| oId "CUFF.98463.3"; tss_id "TSS68147"; |          |   |   |   |                                                                         |
| chr9 Cufflinks exon95869956            | 95870109 | . | + | . | gene_id "XLOC_054413"; transcript_id "TCONS_00089408"; exon_number "2"; |
| oId "CUFF.98463.3"; tss_id "TSS68147"; |          |   |   |   |                                                                         |
| chr9 Cufflinks exon95872850            | 95873003 | . | + | . | gene_id "XLOC_054413"; transcript_id "TCONS_00089408"; exon_number "3"; |
| oId "CUFF.98463.3"; tss_id "TSS68147"; |          |   |   |   |                                                                         |
| chr9 Cufflinks exon95874500            | 95874571 | . | + | . | gene_id "XLOC_054413"; transcript_id "TCONS_00089408"; exon_number "4"; |
| oId "CUFF.98463.3"; tss_id "TSS68147"; |          |   |   |   |                                                                         |
| chr9 Cufflinks exon95875274            | 95875577 | . | + | . | gene_id "XLOC_054413"; transcript_id "TCONS_00089408"; exon_number "5"; |
| oId "CUFF.98463.3"; tss_id "TSS68147"; |          |   |   |   |                                                                         |
| chr9 Cufflinks exon95858405            | 95858634 | . | + | . | gene_id "XLOC_054413"; transcript_id "TCONS_00089406"; exon_number "1"; |
| oId "CUFF.98463.1"; tss_id "TSS68147"; |          |   |   |   |                                                                         |
| chr9 Cufflinks exon95869956            | 95870109 | . | + | . | gene_id "XLOC_054413"; transcript_id "TCONS_00089406"; exon_number "2"; |
| oId "CUFF.98463.1"; tss_id "TSS68147"; |          |   |   |   |                                                                         |
| chr9 Cufflinks exon95872850            | 95873003 | . | + | . | gene_id "XLOC_054413"; transcript_id "TCONS_00089406"; exon_number "3"; |
| oId "CUFF.98463.1"; tss_id "TSS68147"; |          |   |   |   |                                                                         |
| chr9 Cufflinks exon95874161            | 95874220 | . | + | . | gene_id "XLOC_054413"; transcript_id "TCONS_00089406"; exon_number "4"; |
| oId "CUFF.98463.1"; tss_id "TSS68147"; |          |   |   |   |                                                                         |
| chr9 Cufflinks exon95874500            | 95874571 | . | + | . | gene_id "XLOC_054413"; transcript_id "TCONS_00089406"; exon_number "5"; |
| oId "CUFF.98463.1"; tss_id "TSS68147"; |          |   |   |   |                                                                         |
| chr9 Cufflinks exon95875274            | 95875577 | . | + | . | gene_id "XLOC_054413"; transcript_id "TCONS_00089406"; exon_number "6"; |
| oId "CUFF.98463.1"; tss_id "TSS68147"; |          |   |   |   |                                                                         |
| chr9 Cufflinks exon97587136            | 97587151 | . | + | . | gene_id "XLOC_054431"; transcript_id "TCONS_00089456"; exon_number "1"; |

oId "CUFF.98528.1"; tss\_id "TSS68176";  
chr9 Cufflinks exon97588404 97588869 . + . gene\_id "XLOC\_054431"; transcript\_id "TCONS\_00089456"; exon\_number "2";  
oId "CUFF.98528.1"; tss\_id "TSS68176";  
chr9 Cufflinks exon109625927 109628472 . + . gene\_id "XLOC\_054558"; transcript\_id "TCONS\_00089663"; exon\_number "1";  
oId "CUFF.99054.4"; tss\_id "TSS68335";  
chr9 Cufflinks exon109630127 109632063 . + . gene\_id "XLOC\_054558"; transcript\_id "TCONS\_00089663"; exon\_number "2";  
oId "CUFF.99054.4"; tss\_id "TSS68335";  
chr9 Cufflinks exon123605320 123605717 . + . gene\_id "XLOC\_054626"; transcript\_id "TCONS\_00089775"; exon\_number "1";  
oId "CUFF.99375.3"; tss\_id "TSS68422";  
chr9 Cufflinks exon123607271 123607474 . + . gene\_id "XLOC\_054626"; transcript\_id "TCONS\_00089775"; exon\_number "2";  
oId "CUFF.99375.3"; tss\_id "TSS68422";  
chr9 Cufflinks exon123609572 123609631 . + . gene\_id "XLOC\_054626"; transcript\_id "TCONS\_00089775"; exon\_number "3";  
oId "CUFF.99375.3"; tss\_id "TSS68422";  
chr9 Cufflinks exon123613516 123616651 . + . gene\_id "XLOC\_054626"; transcript\_id "TCONS\_00089775"; exon\_number "4";  
oId "CUFF.99375.3"; tss\_id "TSS68422";  
chr9 Cufflinks exon124584555 124584875 . + . gene\_id "XLOC\_054637"; transcript\_id "TCONS\_00089815"; exon\_number "1";  
oId "CUFF.99423.1"; tss\_id "TSS68454";  
chr9 Cufflinks exon124585037 124586099 . + . gene\_id "XLOC\_054637"; transcript\_id "TCONS\_00089815"; exon\_number "2";  
oId "CUFF.99423.1"; tss\_id "TSS68454";  
chr9 Cufflinks exon127420705 127421020 . + . gene\_id "XLOC\_054656"; transcript\_id "TCONS\_00089846"; exon\_number "1";  
oId "CUFF.99487.2"; tss\_id "TSS68477";  
chr9 Cufflinks exon127460524 127461270 . + . gene\_id "XLOC\_054656"; transcript\_id "TCONS\_00089846"; exon\_number "2";  
oId "CUFF.99487.2"; tss\_id "TSS68477";  
chr9 Cufflinks exon127420706 127421020 . + . gene\_id "XLOC\_054656"; transcript\_id "TCONS\_00089847"; exon\_number "1";  
oId "CUFF.99487.5"; tss\_id "TSS68477";  
chr9 Cufflinks exon127460597 127461270 . + . gene\_id "XLOC\_054656"; transcript\_id "TCONS\_00089847"; exon\_number "2";  
oId "CUFF.99487.5"; tss\_id "TSS68477";  
chr9 Cufflinks exon127420706 127421020 . + . gene\_id "XLOC\_054656"; transcript\_id "TCONS\_00089848"; exon\_number "1";  
oId "CUFF.99487.4"; tss\_id "TSS68477";  
chr9 Cufflinks exon127492694 127492814 . + . gene\_id "XLOC\_054656"; transcript\_id "TCONS\_00089848"; exon\_number "2";  
oId "CUFF.99487.4"; tss\_id "TSS68477";  
chr9 Cufflinks exon127498733 127498771 . + . gene\_id "XLOC\_054656"; transcript\_id "TCONS\_00089848"; exon\_number "3";  
oId "CUFF.99487.4"; tss\_id "TSS68477";  
chr9 Cufflinks exon139725374 139725464 . + . gene\_id "XLOC\_054875"; transcript\_id "TCONS\_00090280"; exon\_number "1";  
oId "CUFF.100111.1"; tss\_id "TSS68783";  
chr9 Cufflinks exon139725559 139725672 . + . gene\_id "XLOC\_054875"; transcript\_id "TCONS\_00090280"; exon\_number "2";  
oId "CUFF.100111.1"; tss\_id "TSS68783";  
chr9 Cufflinks exon14481 14940 . - . gene\_id "XLOC\_054920"; transcript\_id "TCONS\_00090353"; exon\_number "1"; oId  
"CUFF.95905.3"; tss\_id "TSS68835";  
chr9 Cufflinks exon15041 15077 . - . gene\_id "XLOC\_054920"; transcript\_id "TCONS\_00090353"; exon\_number "2"; oId  
"CUFF.95905.3"; tss\_id "TSS68835";  
chr9 Cufflinks exon8832468 8833120 . - . gene\_id "XLOC\_055034"; transcript\_id "TCONS\_00090517"; exon\_number "1"; oId  
"CUFF.96286.1"; tss\_id "TSS68967";

chr9 Cufflinks exon8835861 8835969 . - . gene\_id "XLOC\_055034"; transcript\_id "TCONS\_00090517"; exon\_number "2"; oId "CUFF.96286.1"; tss\_id "TSS68967";

chr9 Cufflinks exon8847856 8848164 . - . gene\_id "XLOC\_055035"; transcript\_id "TCONS\_00090518"; exon\_number "1"; oId "CUFF.96287.1"; tss\_id "TSS68968";

chr9 Cufflinks exon8853633 8854411 . - . gene\_id "XLOC\_055035"; transcript\_id "TCONS\_00090518"; exon\_number "2"; oId "CUFF.96287.1"; tss\_id "TSS68968";

chr9 Cufflinks exon33504535 33504589 . - . gene\_id "XLOC\_055185"; transcript\_id "TCONS\_00090752"; exon\_number "1"; oId "CUFF.96814.2"; tss\_id "TSS69153";

chr9 Cufflinks exon33507162 33507333 . - . gene\_id "XLOC\_055185"; transcript\_id "TCONS\_00090752"; exon\_number "2"; oId "CUFF.96814.2"; tss\_id "TSS69153";

chr9 Cufflinks exon33508361 33508427 . - . gene\_id "XLOC\_055185"; transcript\_id "TCONS\_00090752"; exon\_number "3"; oId "CUFF.96814.2"; tss\_id "TSS69153";

chr9 Cufflinks exon33509128 33509334 . - . gene\_id "XLOC\_055185"; transcript\_id "TCONS\_00090752"; exon\_number "4"; oId "CUFF.96814.2"; tss\_id "TSS69153";

chr9 Cufflinks exon33510618 33510709 . - . gene\_id "XLOC\_055185"; transcript\_id "TCONS\_00090752"; exon\_number "5"; oId "CUFF.96814.2"; tss\_id "TSS69153";

chr9 Cufflinks exon33510985 33511164 . - . gene\_id "XLOC\_055185"; transcript\_id "TCONS\_00090752"; exon\_number "6"; oId "CUFF.96814.2"; tss\_id "TSS69153";

chr9 Cufflinks exon34664160 34665187 . - . gene\_id "XLOC\_055217"; transcript\_id "TCONS\_00090810"; exon\_number "1"; oId "CUFF.96890.2"; tss\_id "TSS69196";

chr9 Cufflinks exon34665311 34665370 . - . gene\_id "XLOC\_055217"; transcript\_id "TCONS\_00090810"; exon\_number "2"; oId "CUFF.96890.2"; tss\_id "TSS69196";

chr9 Cufflinks exon34665610 34665677 . - . gene\_id "XLOC\_055217"; transcript\_id "TCONS\_00090810"; exon\_number "3"; oId "CUFF.96890.2"; tss\_id "TSS69196";

chr9 Cufflinks exon34665975 34666053 . - . gene\_id "XLOC\_055217"; transcript\_id "TCONS\_00090810"; exon\_number "4"; oId "CUFF.96890.2"; tss\_id "TSS69196";

chr9 Cufflinks exon34664160 34665187 . - . gene\_id "XLOC\_055217"; transcript\_id "TCONS\_00090809"; exon\_number "1"; oId "CUFF.96890.1"; tss\_id "TSS69196";

chr9 Cufflinks exon34665311 34665370 . - . gene\_id "XLOC\_055217"; transcript\_id "TCONS\_00090809"; exon\_number "2"; oId "CUFF.96890.1"; tss\_id "TSS69196";

chr9 Cufflinks exon34665610 34666053 . - . gene\_id "XLOC\_055217"; transcript\_id "TCONS\_00090809"; exon\_number "3"; oId "CUFF.96890.1"; tss\_id "TSS69196";

chr9 Cufflinks exon35044112 35044499 . - . gene\_id "XLOC\_055227"; transcript\_id "TCONS\_00090821"; exon\_number "1"; oId "CUFF.96925.1"; tss\_id "TSS69207";

chr9 Cufflinks exon35045190 35045273 . - . gene\_id "XLOC\_055227"; transcript\_id "TCONS\_00090821"; exon\_number "2"; oId "CUFF.96925.1"; tss\_id "TSS69207";

chr9 Cufflinks exon96205694 96209979 . - . gene\_id "XLOC\_055597"; transcript\_id "TCONS\_00091467"; exon\_number "1"; oId "CUFF.98472.4"; tss\_id "TSS69673";

chr9 Cufflinks exon96212761 96212881 . - . gene\_id "XLOC\_055597"; transcript\_id "TCONS\_00091467"; exon\_number "2"; oId "CUFF.98472.4"; tss\_id "TSS69673";

chr9 Cufflinks exon96213227 96213873 . - . gene\_id "XLOC\_055597"; transcript\_id "TCONS\_00091467"; exon\_number "3"; oId "CUFF.98472.4"; tss\_id "TSS69673";

chr9 Cufflinks exon139323067 139324259 . - . gene\_id "XLOC\_056047"; transcript\_id "TCONS\_00092248"; exon\_number "1";

|                                         |   |   |   |                                                                         |  |
|-----------------------------------------|---|---|---|-------------------------------------------------------------------------|--|
| oId "CUFF.100056.6"; tss_id "TSS70277"; |   |   |   |                                                                         |  |
| chr9 Cufflinks exon139324729 139324865  | . | - | . | gene_id "XLOC_056047"; transcript_id "TCONS_00092248"; exon_number "2"; |  |
| oId "CUFF.100056.6"; tss_id "TSS70277"; |   |   |   |                                                                         |  |
| chr9 Cufflinks exon139325083 139325301  | . | - | . | gene_id "XLOC_056047"; transcript_id "TCONS_00092248"; exon_number "3"; |  |
| oId "CUFF.100056.6"; tss_id "TSS70277"; |   |   |   |                                                                         |  |
| chr9 Cufflinks exon139651631 139651957  | . | - | . | gene_id "XLOC_056069"; transcript_id "TCONS_00092306"; exon_number "1"; |  |
| oId "CUFF.100104.1"; tss_id "TSS70309"; |   |   |   |                                                                         |  |
| chr9 Cufflinks exon139652123 139652146  | . | - | . | gene_id "XLOC_056069"; transcript_id "TCONS_00092306"; exon_number "2"; |  |
| oId "CUFF.100104.1"; tss_id "TSS70309"; |   |   |   |                                                                         |  |
| chr9 Cufflinks exon139946661 139946677  | . | - | . | gene_id "XLOC_056088"; transcript_id "TCONS_00092342"; exon_number "1"; |  |
| oId "CUFF.100152.1"; tss_id "TSS70334"; |   |   |   |                                                                         |  |
| chr9 Cufflinks exon140201425 140201715  | . | - | . | gene_id "XLOC_056088"; transcript_id "TCONS_00092342"; exon_number "2"; |  |
| oId "CUFF.100152.1"; tss_id "TSS70334"; |   |   |   |                                                                         |  |
| chr9 Cufflinks exon140202060 140202098  | . | - | . | gene_id "XLOC_056088"; transcript_id "TCONS_00092342"; exon_number "3"; |  |
| oId "CUFF.100152.1"; tss_id "TSS70334"; |   |   |   |                                                                         |  |
| chr9 Cufflinks exon140202306 140202446  | . | - | . | gene_id "XLOC_056088"; transcript_id "TCONS_00092342"; exon_number "4"; |  |
| oId "CUFF.100152.1"; tss_id "TSS70334"; |   |   |   |                                                                         |  |
| chrXCufflinks exon21521387 21521460     | . | + | . | gene_id "XLOC_056234"; transcript_id "TCONS_00092593"; exon_number "1"; |  |
| oId "CUFF.100751.1"; tss_id "TSS70524"; |   |   |   |                                                                         |  |
| chrXCufflinks exon21522907 21523171     | . | + | . | gene_id "XLOC_056234"; transcript_id "TCONS_00092593"; exon_number "2"; |  |
| oId "CUFF.100751.1"; tss_id "TSS70524"; |   |   |   |                                                                         |  |
| chrXCufflinks exon49071066 49071209     | . | + | . | gene_id "XLOC_056382"; transcript_id "TCONS_00092876"; exon_number "1"; |  |
| oId "CUFF.101316.1"; tss_id "TSS70705"; |   |   |   |                                                                         |  |
| chrXCufflinks exon49071817 49071945     | . | + | . | gene_id "XLOC_056382"; transcript_id "TCONS_00092876"; exon_number "2"; |  |
| oId "CUFF.101316.1"; tss_id "TSS70705"; |   |   |   |                                                                         |  |
| chrXCufflinks exon49072846 49072955     | . | + | . | gene_id "XLOC_056382"; transcript_id "TCONS_00092876"; exon_number "3"; |  |
| oId "CUFF.101316.1"; tss_id "TSS70705"; |   |   |   |                                                                         |  |
| chrXCufflinks exon55934640 55935233     | . | + | . | gene_id "XLOC_056440"; transcript_id "TCONS_00092990"; exon_number "1"; |  |
| oId "CUFF.101493.7"; tss_id "TSS70788"; |   |   |   |                                                                         |  |
| chrXCufflinks exon56041278 56041394     | . | + | . | gene_id "XLOC_056440"; transcript_id "TCONS_00092990"; exon_number "2"; |  |
| oId "CUFF.101493.7"; tss_id "TSS70788"; |   |   |   |                                                                         |  |
| chrXCufflinks exon56137721 56137751     | . | + | . | gene_id "XLOC_056440"; transcript_id "TCONS_00092990"; exon_number "3"; |  |
| oId "CUFF.101493.7"; tss_id "TSS70788"; |   |   |   |                                                                         |  |
| chrXCufflinks exon55934640 55935233     | . | + | . | gene_id "XLOC_056440"; transcript_id "TCONS_00092991"; exon_number "1"; |  |
| oId "CUFF.101493.2"; tss_id "TSS70788"; |   |   |   |                                                                         |  |
| chrXCufflinks exon56041278 56041394     | . | + | . | gene_id "XLOC_056440"; transcript_id "TCONS_00092991"; exon_number "2"; |  |
| oId "CUFF.101493.2"; tss_id "TSS70788"; |   |   |   |                                                                         |  |
| chrXCufflinks exon56230871 56230988     | . | + | . | gene_id "XLOC_056440"; transcript_id "TCONS_00092991"; exon_number "3"; |  |
| oId "CUFF.101493.2"; tss_id "TSS70788"; |   |   |   |                                                                         |  |
| chrXCufflinks exon55934640 55935233     | . | + | . | gene_id "XLOC_056440"; transcript_id "TCONS_00092993"; exon_number "1"; |  |
| oId "CUFF.101493.5"; tss_id "TSS70788"; |   |   |   |                                                                         |  |
| chrXCufflinks exon56041278 56041394     | . | + | . | gene_id "XLOC_056440"; transcript_id "TCONS_00092993"; exon_number "2"; |  |
| oId "CUFF.101493.5"; tss_id "TSS70788"; |   |   |   |                                                                         |  |

|                                         |           |   |   |   |                                                                         |
|-----------------------------------------|-----------|---|---|---|-------------------------------------------------------------------------|
| chrXCufflinks exon56098198              | 56098250  | . | + | . | gene_id "XLOC_056440"; transcript_id "TCONS_00092993"; exon_number "3"; |
| oId "CUFF.101493.5"; tss_id "TSS70788"; |           |   |   |   |                                                                         |
| chrXCufflinks exon56231415              | 56231649  | . | + | . | gene_id "XLOC_056440"; transcript_id "TCONS_00092993"; exon_number "4"; |
| oId "CUFF.101493.5"; tss_id "TSS70788"; |           |   |   |   |                                                                         |
| chrXCufflinks exon55934640              | 55935233  | . | + | . | gene_id "XLOC_056440"; transcript_id "TCONS_00092992"; exon_number "1"; |
| oId "CUFF.101493.4"; tss_id "TSS70788"; |           |   |   |   |                                                                         |
| chrXCufflinks exon56041278              | 56041394  | . | + | . | gene_id "XLOC_056440"; transcript_id "TCONS_00092992"; exon_number "2"; |
| oId "CUFF.101493.4"; tss_id "TSS70788"; |           |   |   |   |                                                                         |
| chrXCufflinks exon56231406              | 56231649  | . | + | . | gene_id "XLOC_056440"; transcript_id "TCONS_00092992"; exon_number "3"; |
| oId "CUFF.101493.4"; tss_id "TSS70788"; |           |   |   |   |                                                                         |
| chrXCufflinks exon153233040             | 153234521 | . | + | . | gene_id "XLOC_057017"; transcript_id "TCONS_00093877"; exon_number "1"; |
| oId "CUFF.103974.1"; tss_id "TSS71464"; |           |   |   |   |                                                                         |
| chrXCufflinks exon153234650             | 153234825 | . | + | . | gene_id "XLOC_057017"; transcript_id "TCONS_00093877"; exon_number "2"; |
| oId "CUFF.103974.1"; tss_id "TSS71464"; |           |   |   |   |                                                                         |
| chrXCufflinks exon153235239             | 153235878 | . | + | . | gene_id "XLOC_057017"; transcript_id "TCONS_00093877"; exon_number "3"; |
| oId "CUFF.103974.1"; tss_id "TSS71464"; |           |   |   |   |                                                                         |
| chrXCufflinks exon153234216             | 153234521 | . | + | . | gene_id "XLOC_057017"; transcript_id "TCONS_00093879"; exon_number "1"; |
| oId "CUFF.103974.3"; tss_id "TSS71465"; |           |   |   |   |                                                                         |
| chrXCufflinks exon153234650             | 153234822 | . | + | . | gene_id "XLOC_057017"; transcript_id "TCONS_00093879"; exon_number "2"; |
| oId "CUFF.103974.3"; tss_id "TSS71465"; |           |   |   |   |                                                                         |
| chrXCufflinks exon153235236             | 153235878 | . | + | . | gene_id "XLOC_057017"; transcript_id "TCONS_00093879"; exon_number "3"; |
| oId "CUFF.103974.3"; tss_id "TSS71465"; |           |   |   |   |                                                                         |
| chrXCufflinks exon153234216             | 153234521 | . | + | . | gene_id "XLOC_057017"; transcript_id "TCONS_00093878"; exon_number "1"; |
| oId "CUFF.103974.2"; tss_id "TSS71465"; |           |   |   |   |                                                                         |
| chrXCufflinks exon153234650             | 153235878 | . | + | . | gene_id "XLOC_057017"; transcript_id "TCONS_00093878"; exon_number "2"; |
| oId "CUFF.103974.2"; tss_id "TSS71465"; |           |   |   |   |                                                                         |
| chrXCufflinks exon17650747              | 17654262  | . | - | . | gene_id "XLOC_057253"; transcript_id "TCONS_00094204"; exon_number "1"; |
| oId "CUFF.100692.1"; tss_id "TSS71738"; |           |   |   |   |                                                                         |
| chrXCufflinks exon17657527              | 17658516  | . | - | . | gene_id "XLOC_057253"; transcript_id "TCONS_00094204"; exon_number "2"; |
| oId "CUFF.100692.1"; tss_id "TSS71738"; |           |   |   |   |                                                                         |
| chrXCufflinks exon17666420              | 17666550  | . | - | . | gene_id "XLOC_057253"; transcript_id "TCONS_00094204"; exon_number "3"; |
| oId "CUFF.100692.1"; tss_id "TSS71738"; |           |   |   |   |                                                                         |
| chrXCufflinks exon17654412              | 17656165  | . | - | . | gene_id "XLOC_057253"; transcript_id "TCONS_00094205"; exon_number "1"; |
| oId "CUFF.100692.2"; tss_id "TSS71739"; |           |   |   |   |                                                                         |
| chrXCufflinks exon17657527              | 17658516  | . | - | . | gene_id "XLOC_057253"; transcript_id "TCONS_00094205"; exon_number "2"; |
| oId "CUFF.100692.2"; tss_id "TSS71739"; |           |   |   |   |                                                                         |
| chrXCufflinks exon17669609              | 17669781  | . | - | . | gene_id "XLOC_057253"; transcript_id "TCONS_00094205"; exon_number "3"; |
| oId "CUFF.100692.2"; tss_id "TSS71739"; |           |   |   |   |                                                                         |
| chrXCufflinks exon19942499              | 19943025  | . | - | . | gene_id "XLOC_057269"; transcript_id "TCONS_00094238"; exon_number "1"; |
| oId "CUFF.100734.1"; tss_id "TSS71766"; |           |   |   |   |                                                                         |
| chrXCufflinks exon19944104              | 19944173  | . | - | . | gene_id "XLOC_057269"; transcript_id "TCONS_00094238"; exon_number "2"; |
| oId "CUFF.100734.1"; tss_id "TSS71766"; |           |   |   |   |                                                                         |
| chrXCufflinks exon30845559              | 30849692  | . | - | . | gene_id "XLOC_057292"; transcript_id "TCONS_00094280"; exon_number "1"; |

|                                                                                  |   |   |   |                                                                         |
|----------------------------------------------------------------------------------|---|---|---|-------------------------------------------------------------------------|
| oId "CUFF.100851.4"; tss_id "TSS71796";<br>chrXCufflinks exon30852168 30852269   | . | - | . | gene_id "XLOC_057292"; transcript_id "TCONS_00094280"; exon_number "2"; |
| oId "CUFF.100851.4"; tss_id "TSS71796";<br>chrXCufflinks exon30852400 30852449   | . | - | . | gene_id "XLOC_057292"; transcript_id "TCONS_00094280"; exon_number "3"; |
| oId "CUFF.100851.4"; tss_id "TSS71796";<br>chrXCufflinks exon40003535 40004159   | . | - | . | gene_id "XLOC_057340"; transcript_id "TCONS_00094359"; exon_number "1"; |
| oId "CUFF.100962.2"; tss_id "TSS71854";<br>chrXCufflinks exon40004751 40005281   | . | - | . | gene_id "XLOC_057340"; transcript_id "TCONS_00094359"; exon_number "2"; |
| oId "CUFF.100962.2"; tss_id "TSS71854";<br>chrXCufflinks exon40003535 40004159   | . | - | . | gene_id "XLOC_057340"; transcript_id "TCONS_00094360"; exon_number "1"; |
| oId "CUFF.100962.1"; tss_id "TSS71854";<br>chrXCufflinks exon40005321 40005357   | . | - | . | gene_id "XLOC_057340"; transcript_id "TCONS_00094360"; exon_number "2"; |
| oId "CUFF.100962.1"; tss_id "TSS71854";<br>chrXCufflinks exon40030964 40031337   | . | - | . | gene_id "XLOC_057346"; transcript_id "TCONS_00094367"; exon_number "1"; |
| oId "CUFF.100971.1"; tss_id "TSS71861";<br>chrXCufflinks exon40031892 40033732   | . | - | . | gene_id "XLOC_057346"; transcript_id "TCONS_00094367"; exon_number "2"; |
| oId "CUFF.100971.1"; tss_id "TSS71861";<br>chrXCufflinks exon49044265 49045735   | . | - | . | gene_id "XLOC_057460"; transcript_id "TCONS_00094546"; exon_number "1"; |
| oId "CUFF.101312.1"; tss_id "TSS71997";<br>chrXCufflinks exon49046927 49047343   | . | - | . | gene_id "XLOC_057460"; transcript_id "TCONS_00094546"; exon_number "2"; |
| oId "CUFF.101312.1"; tss_id "TSS71997";<br>chrXCufflinks exon109437414 109441862 | . | - | . | gene_id "XLOC_057817"; transcript_id "TCONS_00095144"; exon_number "1"; |
| oId "CUFF.103075.1"; tss_id "TSS72433";<br>chrXCufflinks exon109443998 109444065 | . | - | . | gene_id "XLOC_057817"; transcript_id "TCONS_00095144"; exon_number "2"; |
| oId "CUFF.103075.1"; tss_id "TSS72433";<br>chrXCufflinks exon133675232 133677961 | . | - | . | gene_id "XLOC_057949"; transcript_id "TCONS_00095396"; exon_number "1"; |
| oId "CUFF.103579.2"; tss_id "TSS72605";<br>chrXCufflinks exon133678744 133683690 | . | - | . | gene_id "XLOC_057949"; transcript_id "TCONS_00095396"; exon_number "2"; |
| oId "CUFF.103579.2"; tss_id "TSS72605";<br>chrXCufflinks exon133675232 133678827 | . | - | . | gene_id "XLOC_057949"; transcript_id "TCONS_00095395"; exon_number "1"; |
| oId "CUFF.103579.1"; tss_id "TSS72605";<br>chrXCufflinks exon133680582 133683690 | . | - | . | gene_id "XLOC_057949"; transcript_id "TCONS_00095395"; exon_number "2"; |
| oId "CUFF.103579.1"; tss_id "TSS72605";<br>chrXCufflinks exon138808473 138811121 | . | - | . | gene_id "XLOC_057996"; transcript_id "TCONS_00095477"; exon_number "1"; |
| oId "CUFF.103737.5"; tss_id "TSS72664";<br>chrXCufflinks exon138819890 138819923 | . | - | . | gene_id "XLOC_057996"; transcript_id "TCONS_00095477"; exon_number "2"; |
| oId "CUFF.103737.5"; tss_id "TSS72664";<br>chrXCufflinks exon149934809 149937574 | . | - | . | gene_id "XLOC_058032"; transcript_id "TCONS_00095538"; exon_number "1"; |
| oId "CUFF.103855.5"; tss_id "TSS72707";<br>chrXCufflinks exon149938777 149938842 | . | - | . | gene_id "XLOC_058032"; transcript_id "TCONS_00095538"; exon_number "2"; |
| oId "CUFF.103855.5"; tss_id "TSS72707";<br>chrXCufflinks exon149938988 149939025 | . | - | . | gene_id "XLOC_058032"; transcript_id "TCONS_00095538"; exon_number "3"; |
| oId "CUFF.103855.5"; tss_id "TSS72707";                                          |   |   |   |                                                                         |

|                                         |           |   |   |   |                                                                         |
|-----------------------------------------|-----------|---|---|---|-------------------------------------------------------------------------|
| chrXCufflinks exon151876743             | 151877122 | . | - | . | gene_id "XLOC_058041"; transcript_id "TCONS_00095557"; exon_number "1"; |
| oId "CUFF.103883.1"; tss_id "TSS72719"; |           |   |   |   |                                                                         |
| chrXCufflinks exon151877317             | 151877489 | . | - | . | gene_id "XLOC_058041"; transcript_id "TCONS_00095557"; exon_number "2"; |
| oId "CUFF.103883.1"; tss_id "TSS72719"; |           |   |   |   |                                                                         |
| chrXCufflinks exon151877944             | 151878058 | . | - | . | gene_id "XLOC_058041"; transcript_id "TCONS_00095557"; exon_number "3"; |
| oId "CUFF.103883.1"; tss_id "TSS72719"; |           |   |   |   |                                                                         |
| chrXCufflinks exon151881745             | 151881804 | . | - | . | gene_id "XLOC_058041"; transcript_id "TCONS_00095557"; exon_number "4"; |
| oId "CUFF.103883.1"; tss_id "TSS72719"; |           |   |   |   |                                                                         |
| chrXCufflinks exon151882978             | 151883038 | . | - | . | gene_id "XLOC_058041"; transcript_id "TCONS_00095557"; exon_number "5"; |
| oId "CUFF.103883.1"; tss_id "TSS72719"; |           |   |   |   |                                                                         |
